# Supplementary material for: Transcriptomics and quantitative proteomics reveal changes after second stimulation of bone marrow-derived macrophages from lupus-prone MRL/lpr mice
Source: Front Immunol. 2022 Oct 19;13:1004232. doi: 10.3389/fimmu.2022.1004232 (PMC9627492; doi:10.3389/fimmu.2022.1004232)
Supplement: Supplementary file 1 [file Table_1.xlsx]

## Sheet: Sheet1
id	baseMean	baseMean_A	baseMean_B	foldChange(B/A)(B/A)	log2FoldChange	pval	padj	Chromosome	Start Site	End Site	Direction	Length	Name	GO	KEGG	EC	eggNOG Class	eggNOG	Description	Entrez_geneID	UniProtAC
ENSMUSG00000006818	17762.2	917.263	34607.1	37.7286	5.23759	0	0	17	13225733	13258950	+	10008	Sod2	GO:0004784;GO:0005759;GO:0006801;GO:0019430;GO:0046872;GO:0055114;GO:0000302;GO:0000303;GO:0001306;GO:0001315;GO:0001315;GO:0001666;GO:0001836;GO:0001889;GO:0003032;GO:0003069;GO:0003677;GO:0003677;GO:0004784;GO:0004784;GO:0004784;GO:0004784;GO:0004784;GO:0005515;GO:0005737;GO:0005737;GO:0005739;GO:0005739;GO:0005739;GO:0005739;GO:0005743;GO:0005759;GO:0005759;GO:0006357;GO:0006357;GO:0006749;GO:…	K04564	EC:1.15.1.1	P	0DMMM;1CWH5;0UTQD;KOG0876;0V45V;12R7H;1B44M;18Z5H;09ZJN	superoxide dismutase 2, mitochondrial [Source:MGI Symbol;Acc:MGI:98352]	20656	P09671;Q4FJX9
ENSMUSG00000017009	13712.4	711.184	26713.7	37.5623	5.23121	0	0	2	164266167	164285807	-	2547	Sdc4	GO:0001657;GO:0001843;GO:0001968;GO:0001968;GO:0005080;GO:0005080;GO:0005515;GO:0005576;GO:0005796;GO:0005925;GO:0005925;GO:0009986;GO:0009986;GO:0009986;GO:0010762;GO:0016020;GO:0016020;GO:0016021;GO:0016477;GO:0042060;GO:0042130;GO:0042130;GO:0042802;GO:0042802;GO:0042802;GO:0043034;GO:0043034;GO:0045121;GO:0045121;GO:0045860;GO:0045860;GO:0051496;GO:0051496;GO:0051894;GO:0051894;GO:0060122;GO:…	K16338	-	W;T	13RBQ;0VDJG;0UKWC;1CZD7;1ATRY;0IXIG;192PV;0A2PM;0DQBB	syndecan 4 [Source:MGI Symbol;Acc:MGI:1349164]	20971	O35988;Q3U5S6
ENSMUSG00000017652	12044.1	19.6329	24068.7	1225.94	10.2597	0	0	2	164897547	164914868	+	3406	Cd40	GO:0001934;GO:0001934;GO:0002376;GO:0002637;GO:0002637;GO:0002768;GO:0002768;GO:0003823;GO:0003823;GO:0003823;GO:0005515;GO:0005515;GO:0005576;GO:0005615;GO:0005615;GO:0005737;GO:0005737;GO:0005886;GO:0005886;GO:0006874;GO:0006874;GO:0006874;GO:0006954;GO:0006954;GO:0006954;GO:0009617;GO:0009897;GO:0009897;GO:0009897;GO:0009986;GO:0009986;GO:0016020;GO:0016021;GO:0019899;GO:0019899;GO:0019904;GO:…	K03160	-	T	0VFS7;0A15X;19164;1D0E0;0IY0H;1B166;13SA9;0US0P;0DSBB	CD40 antigen [Source:MGI Symbol;Acc:MGI:88336]	21939	P27512
ENSMUSG00000018930	6811.53	74.923	13548.1	180.827	7.49847	0	0	11	83553410	83555509	+	660	Ccl4	GO:0002548;GO:0005125;GO:0005515;GO:0005576;GO:0005576;GO:0005615;GO:0005615;GO:0005615;GO:0006935;GO:0006954;GO:0006954;GO:0006954;GO:0006955;GO:0007165;GO:0007186;GO:0008009;GO:0008009;GO:0008009;GO:0009636;GO:0030593;GO:0030595;GO:0031726;GO:0031730;GO:0032760;GO:0035690;GO:0042802;GO:0043117;GO:0043547;GO:0043922;GO:0048020;GO:0048245;GO:0048247;GO:0050850;GO:0051928;GO:0060326;GO:0070098;GO:…	K12964	-	W;T	13X8V;1B6HY;0UVZK;196B4;1D4A0;0DUZ9;0J4I9;0A8E2;0VJA1	chemokine (C-C motif) ligand 4 [Source:MGI Symbol;Acc:MGI:98261]	20303	P14097;Q5QNV9
ENSMUSG00000021025	14078.9	693.861	27464	39.5814	5.30675	0	0	12	55536195	55539432	-	1610	Nfkbia	GO:0005515;GO:0005515;GO:0005515;GO:0005634;GO:0005634;GO:0005634;GO:0005737;GO:0005737;GO:0005737;GO:0005829;GO:0005829;GO:0005886;GO:0005886;GO:0006606;GO:0007249;GO:0007249;GO:0007253;GO:0007253;GO:0008139;GO:0008139;GO:0010468;GO:0010745;GO:0010745;GO:0010875;GO:0010875;GO:0010888;GO:0010888;GO:0019899;GO:0019899;GO:0031072;GO:0031625;GO:0031625;GO:0031663;GO:0032088;GO:0032088;GO:0032270;GO:…	K04734	-	K;E	0UMFD;KOG0504;1AWTT;0V8EB;1CTJ4;18VJA;09XG9;0DITT;13MEG	nuclear factor of kappa light polypeptide gene enhancer in B cells inhibitor, alpha [Source:MGI Symbol;Acc:MGI:104741]	18035	Q9Z1E3
ENSMUSG00000022126	59794.6	33.2789	119556	3592.54	11.8108	0	0	14	103284413	103294009	+	2623	Acod1	GO:0002760;GO:0006952;GO:0016829;GO:0047613;GO:0071222;GO:0072573;	K17724	EC:4.1.1.6	S;T;K	12NUR;0V5MT;0UQK2;09UN7;18X5T;0DFY0;0IEAF;1AW9Z;1CQMH	aconitate decarboxylase 1 [Source:MGI Symbol;Acc:MGI:103206]	16365	P54987;A0A0R4J027
ENSMUSG00000023067	12223.6	488.681	23958.5	49.0269	5.6155	0	0	17	29309950	29319701	+	3553	Cdkn1a	GO:0000079;GO:0000082;GO:0000086;GO:0000307;GO:0004860;GO:0004860;GO:0004861;GO:0004861;GO:0005515;GO:0005515;GO:0005515;GO:0005515;GO:0005634;GO:0005634;GO:0005634;GO:0005654;GO:0005730;GO:0005737;GO:0005737;GO:0005829;GO:0006606;GO:0006974;GO:0006974;GO:0006977;GO:0006978;GO:0007049;GO:0007050;GO:0007050;GO:0007050;GO:0007050;GO:0007095;GO:0007095;GO:0007346;GO:0007346;GO:0007507;GO:0008285;GO:…	K06625	-	T	1933H;13Q29;1D30F;0UV0F;1B5ST;0DTNN;0A6NZ;0VHH2;KOG4743	cyclin-dependent kinase inhibitor 1A (P21) [Source:MGI Symbol;Acc:MGI:104556]	12575	P39689;Q564P6
ENSMUSG00000024401	52027	145.686	103908	713.236	9.47824	0	0	17	35418357	35420983	-	1639	Tnf	GO:0000122;GO:0000122;GO:0000122;GO:0000165;GO:0000165;GO:0000185;GO:0000185;GO:0000187;GO:0000187;GO:0000976;GO:0000976;GO:0001774;GO:0001774;GO:0001775;GO:0001819;GO:0001819;GO:0001891;GO:0001932;GO:0001934;GO:0001934;GO:0001934;GO:0001937;GO:0002020;GO:0002020;GO:0002020;GO:0002037;GO:0002269;GO:0002439;GO:0002439;GO:0002637;GO:0002719;GO:0002719;GO:0002876;GO:0002925;GO:0003085;GO:0005125;GO:…	K03156	-	T;V	0ISAN;18UT2;1CPFN;0UFSN;13NCV;0V4DY;1B3M4;0DERX;09TEV	tumor necrosis factor [Source:MGI Symbol;Acc:MGI:104798]	21926	P06804;Q3U593
ENSMUSG00000026390	14574.1	813.033	28335.2	34.8512	5.12314	0	0	1	120402267	120432753	-	1925	Marco	GO:0001540;GO:0001664;GO:0001664;GO:0001664;GO:0001934;GO:0002376;GO:0005044;GO:0005581;GO:0005737;GO:0005886;GO:0005886;GO:0005886;GO:0005886;GO:0006897;GO:0006897;GO:0006897;GO:0006898;GO:0006911;GO:0007193;GO:0016020;GO:0016020;GO:0016021;GO:0038024;GO:0043277;GO:0045087;GO:0070374;GO:0097242;GO:0016020;GO:0016021;	K13884	-	T;U	18Y2U;09ZMZ;1CW0U;0DM5Q;1B49R;0IHK7;0UPR3;0VAIN;13N6N	macrophage receptor with collagenous structure [Source:MGI Symbol;Acc:MGI:1309998]	17167	Q60754;A2RT24
ENSMUSG00000026875	3931.96	59.8308	7804.08	130.436	7.0272	0	0	2	34831762	34851784	-	8819	Traf1	GO:0005164;GO:0005164;GO:0005164;GO:0005164;GO:0005515;GO:0005515;GO:0005515;GO:0005737;GO:0006915;GO:0007165;GO:0008270;GO:0009898;GO:0031625;GO:0031625;GO:0031625;GO:0031996;GO:0031996;GO:0033209;GO:0042802;GO:0042802;GO:0042981;GO:0043122;GO:0046330;GO:0051092;GO:0051092;GO:0070534;GO:2001236;GO:2001236;GO:0005164;GO:0005164;GO:0005164;GO:0005515;GO:0005515;GO:0005515;GO:0005737;GO:0006915;GO:…	K03172	-	T	0B5NE;0V3IZ;1BBA8;0WIAG;1DFWW;0ISDN;197CD;13EZK;0E90Q	TNF receptor-associated factor 1 [Source:MGI Symbol;Acc:MGI:101836]	22029	P39428
ENSMUSG00000027398	48792	33.4811	97550.5	2913.6	11.5086	0	0	2	129206490	129213059	-	1907	Il1b	GO:0000122;GO:0000165;GO:0000187;GO:0001660;GO:0001934;GO:0005125;GO:0005125;GO:0005125;GO:0005149;GO:0005178;GO:0005178;GO:0005576;GO:0005576;GO:0005576;GO:0005615;GO:0005615;GO:0005615;GO:0005615;GO:0005615;GO:0005737;GO:0005764;GO:0005776;GO:0005829;GO:0006954;GO:0006954;GO:0006954;GO:0006954;GO:0006955;GO:0007204;GO:0007613;GO:0008284;GO:0008285;GO:0009743;GO:0010573;GO:0010573;GO:0010575;GO:…	K04519	-	T;V	0DRYM;1CWH6;18TT7;0VFAB;0UPAA;13ME0;0IGSZ;1ASW1;0A43M	interleukin 1 beta [Source:MGI Symbol;Acc:MGI:96543]	16176	P10749
ENSMUSG00000027399	9424.36	43.5015	18805.2	432.289	8.75585	0	0	2	129141530	129151892	-	1974	Il1a	GO:0001660;GO:0001819;GO:0001819;GO:0002248;GO:0005125;GO:0005125;GO:0005125;GO:0005125;GO:0005149;GO:0005149;GO:0005507;GO:0005507;GO:0005507;GO:0005576;GO:0005576;GO:0005615;GO:0005615;GO:0005615;GO:0005615;GO:0005615;GO:0005737;GO:0005829;GO:0005829;GO:0005829;GO:0005886;GO:0006883;GO:0006954;GO:0006954;GO:0006954;GO:0006955;GO:0008285;GO:0008285;GO:0009986;GO:0010575;GO:0010628;GO:0010628;GO:…	K04383	-	W;T	1AWYQ;0UFPI;0JAAI;0DHQC;142BS;192YM;0V7DF;09WEY;1CSEP	interleukin 1 alpha [Source:MGI Symbol;Acc:MGI:96542]	16175	P01582;Q3U0Y6
ENSMUSG00000028270	3233.2	35.4105	6430.99	181.613	7.50472	0	0	3	142326363	142343769	+	2516	Gbp2	GO:0000139;GO:0000166;GO:0003924;GO:0003924;GO:0003924;GO:0005525;GO:0005525;GO:0005525;GO:0005634;GO:0005654;GO:0005737;GO:0005737;GO:0005794;GO:0005794;GO:0005829;GO:0009617;GO:0015629;GO:0016020;GO:0016787;GO:0020005;GO:0031410;GO:0031410;GO:0034504;GO:0035458;GO:0042803;GO:0042832;GO:0042832;GO:0044406;GO:0048471;GO:0048471;GO:0050830;GO:0050830;GO:0071222;GO:0071346;GO:0071346;GO:0003924;GO:…	K20897	-	S;O;T;D;C;K	1AVYD;0UI2K;0V9BC;134KU;09XSJ;KOG2037;1CUKV;0DJTQ;194H1	guanylate binding protein 2 [Source:MGI Symbol;Acc:MGI:102772]	14469	Q9Z0E6
ENSMUSG00000028525	3180	73.9395	6286.07	85.0164	6.40967	0	0	4	101944740	102464456	+	10560	Pde4b	GO:0000930;GO:0001780;GO:0004114;GO:0004114;GO:0004115;GO:0004115;GO:0004115;GO:0004115;GO:0004115;GO:0004115;GO:0005515;GO:0005634;GO:0005634;GO:0005737;GO:0005813;GO:0005829;GO:0005829;GO:0005891;GO:0006198;GO:0006198;GO:0007165;GO:0007165;GO:0008021;GO:0008081;GO:0009408;GO:0014069;GO:0016020;GO:0016787;GO:0030018;GO:0030552;GO:0030552;GO:0030593;GO:0032729;GO:0032729;GO:0032743;GO:0032743;GO:…	K13293	EC:3.1.4.53	T	0UHKN;1ATCI;1CUW1;0DK28;18ZRC;0V756;12PR9;09W6Y;KOG3689	phosphodiesterase 4B, cAMP specific [Source:MGI Symbol;Acc:MGI:99557]	18578	Q8VBU5;B1AWD0
ENSMUSG00000030156	4310.31	7.42958	8613.2	1159.31	10.1791	0	0	6	129244288	129252399	-	6509	Cd69	GO:0005509;GO:0009897;GO:0009897;GO:0009986;GO:0016020;GO:0016021;GO:0030246;GO:0032991;GO:0035690;GO:0042802;	K06502	-	T;V	195IN;1CVY5;0UQ6A;13UWE;KOG4297;0A4RD;1AZWK;0DM34;0VFK9	CD69 antigen [Source:MGI Symbol;Acc:MGI:88343]	12515	P37217;Q3U6A8
ENSMUSG00000032688	15226.2	839.694	29612.8	35.2662	5.14021	0	0	18	65564009	65612138	+	18040	Malt1	GO:0001650;GO:0001650;GO:0001923;GO:0002020;GO:0002096;GO:0002726;GO:0002726;GO:0004197;GO:0004842;GO:0004842;GO:0005515;GO:0005634;GO:0005634;GO:0005634;GO:0005737;GO:0005737;GO:0005737;GO:0005829;GO:0005829;GO:0005829;GO:0005829;GO:0006508;GO:0006508;GO:0006508;GO:0006508;GO:0006915;GO:0007249;GO:0007250;GO:0007250;GO:0008233;GO:0008233;GO:0008233;GO:0009620;GO:0016567;GO:0016787;GO:0019209;GO:…	K07369	EC:3.4.22.-	T;K	13JDV;09WF9;18X9Y;1AY41;0DHQM;0UJYV;0IG3U;0V7DU;1CSEY	MALT1 paracaspase [Source:MGI Symbol;Acc:MGI:2445027]	240354	Q2TBA3
ENSMUSG00000037405	17023.7	532.61	33514.7	62.9254	5.97557	0	0	9	20927281	20940113	+	4360	Icam1	GO:0001772;GO:0002291;GO:0002291;GO:0002438;GO:0002457;GO:0002693;GO:0002693;GO:0005178;GO:0005178;GO:0005178;GO:0005615;GO:0005615;GO:0005886;GO:0005887;GO:0007155;GO:0007155;GO:0007155;GO:0007155;GO:0007159;GO:0007159;GO:0007605;GO:0008360;GO:0009897;GO:0009986;GO:0016020;GO:0016020;GO:0016021;GO:0022614;GO:0030838;GO:0033627;GO:0043547;GO:0044406;GO:0044406;GO:0044877;GO:0045121;GO:0045429;GO:…	K06490	-	T;W	1B090;13NCQ;0IPHM;0DMAY;1CR6B;0UIWP;09W69;195US;0VAP3	intercellular adhesion molecule 1 [Source:MGI Symbol;Acc:MGI:96392]	15894	P13597;Q3U8M7
ENSMUSG00000040253	2353.18	37.2542	4669.1	125.331	6.9696	0	0	3	142236103	142255910	+	5614	Gbp7	GO:0003924;GO:0003924;GO:0005525;GO:0005525;GO:0005794;GO:0020005;GO:0031410;GO:0031410;GO:0042832;GO:0042832;GO:0044406;GO:0050830;GO:0050830;GO:0071346;GO:0071346;GO:0003924;GO:0003924;GO:0005525;GO:0005525;GO:0005794;GO:0020005;GO:0031410;GO:0031410;GO:0042832;GO:0042832;GO:0044406;GO:0050830;GO:0050830;GO:0071346;GO:0071346;	K20899	-	S;O;T;D;C;K	191WI;0V9BC;134KU;09XSJ;1AYRV;KOG2037;1CUKV;0UNNF;0DJTQ	guanylate binding protein 7 [Source:MGI Symbol;Acc:MGI:2444421]	229900	Q91Z40
ENSMUSG00000045551	4506.52	59.6458	8953.39	150.109	7.22987	0	0	17	18096733	18104202	-	1324	Fpr1	GO:0001664;GO:0001664;GO:0002430;GO:0004875;GO:0004930;GO:0004930;GO:0004930;GO:0004982;GO:0004982;GO:0004982;GO:0004982;GO:0005124;GO:0005124;GO:0005737;GO:0005737;GO:0005886;GO:0005886;GO:0005886;GO:0005886;GO:0006935;GO:0006935;GO:0006954;GO:0007165;GO:0007186;GO:0007186;GO:0007186;GO:0007200;GO:0007200;GO:0007200;GO:0007204;GO:0016020;GO:0016021;GO:0016021;GO:0050786;GO:0050786;	K04172	-	T	09YRX;194JK;1CTRF;0DNT1;0II0H;1AX0S;13FV7;0UP03;0V7XT	formyl peptide receptor 1 [Source:MGI Symbol;Acc:MGI:107443]	14293	P33766
ENSMUSG00000047945	16283.3	248.525	32318	130.039	7.02281	0	0	4	129407374	129409778	+	1605	Marcksl1	GO:0003779;GO:0005516;GO:0005516;GO:0005737;GO:0005737;GO:0005856;GO:0005886;GO:0005886;GO:0005886;GO:0005886;GO:0007015;GO:0007417;GO:0008021;GO:0008284;GO:0016020;GO:0051015;GO:0099026;GO:0099509;GO:0099523;GO:0099626;	K13536	-	Z;T	0DSQI;1B34S;0A5BR;0UFPR;0V8IT;0IDYZ;1CYX1;12U8H;193FC	MARCKS-like 1 [Source:MGI Symbol;Acc:MGI:97143]	17357	P28667
ENSMUSG00000053113	7202.56	22.6863	14382.4	633.97	9.30827	0	0	11	117856905	117860873	-	2891	Socs3	GO:0001784;GO:0001932;GO:0005515;GO:0005515;GO:0005737;GO:0005829;GO:0005942;GO:0007165;GO:0007259;GO:0007259;GO:0009968;GO:0009968;GO:0016567;GO:0035556;GO:0035556;GO:0040008;GO:0042532;GO:0042532;GO:0043066;GO:0043551;GO:0045595;GO:0045597;GO:0046426;GO:0046426;GO:0046627;GO:0046854;GO:0046935;GO:0050728;GO:0060670;GO:0060674;GO:0060707;GO:0060708;GO:1990830;	K04696	-	T	0DS95;191EU;0A4T3;KOG4566;13IYN;0VFMZ;1CZRN;1AX90;0UR4C	suppressor of cytokine signaling 3 [Source:MGI Symbol;Acc:MGI:1201791]	12702	O35718
ENSMUSG00000105504	6884.26	3.71479	13764.8	3705.41	11.8554	0	0	3	142199739	142228105	+	6637	Gbp5	GO:0000139;GO:0000166;GO:0002376;GO:0003924;GO:0003924;GO:0005515;GO:0005525;GO:0005525;GO:0005525;GO:0005737;GO:0005737;GO:0005794;GO:0005794;GO:0006954;GO:0009617;GO:0016020;GO:0016787;GO:0031410;GO:0031410;GO:0032611;GO:0032621;GO:0034067;GO:0042802;GO:0042803;GO:0045089;GO:0048471;GO:0051289;GO:0051289;GO:0071346;GO:0071346;GO:1900017;GO:1900227;GO:1900227;GO:0003924;GO:0005525;GO:0005794;GO:…	K20898	-	S;K	0V5RR;0DG1U;09US8;18XUQ;1ASMB;KOG2037;1CQRC;0UHMY;13NFW	guanylate binding protein 5 [Source:MGI Symbol;Acc:MGI:2429943]	229898	Q8CFB4;Q8BMN7
ENSMUSG00000035164	5289.37	255.467	10323.3	40.4094	5.33662	6.5491e-305	4.2461e-302	9	52022644	52079872	-	6845	Zc3h12c	GO:0003729;GO:0004518;GO:0004519;GO:0004521;GO:0005634;GO:0016787;GO:0036464;GO:0046872;GO:0046872;GO:0090502;GO:0004518;GO:0004519;GO:0016787;GO:0046872;GO:0046872;GO:0090305;	K18668	EC:3.1.-.-	A;S;K	0UKS4;0DGMG;12RNG;KOG3777;09VCG;0V6BM;1CTUQ;1B0NC;18U9J	zinc finger CCCH type containing 12C [Source:MGI Symbol;Acc:MGI:3026959]	244871	Q5DTV4;E9Q1I3
ENSMUSG00000000982	21800.4	189.783	43411	228.74	7.83756	1.56641e-301	9.73261e-299	11	83538670	83540181	-	766	Ccl3	GO:0000165;GO:0001649;GO:0001775;GO:0002548;GO:0002548;GO:0004672;GO:0004698;GO:0005125;GO:0005515;GO:0005515;GO:0005576;GO:0005576;GO:0005615;GO:0005615;GO:0005615;GO:0005737;GO:0005829;GO:0006468;GO:0006816;GO:0006874;GO:0006887;GO:0006935;GO:0006954;GO:0006954;GO:0006954;GO:0006955;GO:0007010;GO:0007165;GO:0007186;GO:0007204;GO:0007204;GO:0007267;GO:0008009;GO:0008009;GO:0008009;GO:0008009;GO:…	K05408	-	T	196EQ;0UWD3;0DVHK;146RM;1D4YW;1B6KP;0J4I9;0A9HK;0VKER	chemokine (C-C motif) ligand 3 [Source:MGI Symbol;Acc:MGI:98260]	20302	P10855;Q5QNW0
ENSMUSG00000019850	15371	1044.15	29697.9	28.4421	4.82996	1.13168e-296	6.75026e-294	10	18876658	18891405	-	7226	Tnfaip3	GO:0001922;GO:0002020;GO:0002020;GO:0002237;GO:0002237;GO:0002237;GO:0002315;GO:0002632;GO:0002634;GO:0002637;GO:0002677;GO:0003677;GO:0003677;GO:0003824;GO:0004842;GO:0004842;GO:0004842;GO:0004843;GO:0004843;GO:0004843;GO:0004843;GO:0005515;GO:0005515;GO:0005515;GO:0005515;GO:0005634;GO:0005634;GO:0005634;GO:0005634;GO:0005737;GO:0005737;GO:0005737;GO:0005764;GO:0006508;GO:0006915;GO:0006954;GO:…	K11859	EC:3.4.19.12	T;K	13DPS;0WHDR;0IQZK;1979D;0B4UY;0V39Z;1DFG3;1BB3R;0E8HZ	tumor necrosis factor, alpha-induced protein 3 [Source:MGI Symbol;Acc:MGI:1196377]	21929	Q60769;Q7TQD1
ENSMUSG00000027995	10418.8	738.196	20099.3	27.2277	4.767	9.31198e-281	5.34078e-278	3	83743579	83749074	-	3014	Tlr2	GO:0001530;GO:0001540;GO:0001666;GO:0001774;GO:0001775;GO:0002224;GO:0002224;GO:0002237;GO:0002376;GO:0002755;GO:0004888;GO:0005737;GO:0005794;GO:0005886;GO:0005887;GO:0006691;GO:0006954;GO:0006954;GO:0006954;GO:0006955;GO:0007165;GO:0007252;GO:0008285;GO:0009636;GO:0009986;GO:0009986;GO:0010628;GO:0016020;GO:0016021;GO:0016021;GO:0030177;GO:0030670;GO:0031226;GO:0031410;GO:0032289;GO:0032493;GO:…	K10159	-	T	0DII2;1ARAQ;12R4X;09U4Y;0V85A;0UM2G;1CT8N;KOG4641;191N5	toll-like receptor 2 [Source:MGI Symbol;Acc:MGI:1346060]	24088	Q9QUN7;G3X8Y8
ENSMUSG00000025225	6794.37	445.004	13143.7	29.5362	4.88441	1.80922e-278	9.99227e-276	19	46292759	46300824	+	4584	Nfkb2	GO:0003677;GO:0003677;GO:0003700;GO:0005634;GO:0005737;GO:0005737;GO:0006355;GO:0007165;GO:0000785;GO:0000978;GO:0000978;GO:0000981;GO:0001228;GO:0002268;GO:0002467;GO:0003677;GO:0003677;GO:0003700;GO:0005515;GO:0005634;GO:0005634;GO:0005737;GO:0005737;GO:0005737;GO:0005829;GO:0006355;GO:0006355;GO:0006357;GO:0007165;GO:0030198;GO:0033257;GO:0038061;GO:0045944;GO:0048511;GO:0048535;GO:0048536;GO:…	K04469	-	K;E	0VD3P;KOG0504;0A3C4;18TUE;1B0KB;0UJGQ;1CTIN;0DITA;13GBI	nuclear factor of kappa light polypeptide gene enhancer in B cells 2, p49/p100 [Source:MGI Symbol;Acc:MGI:1099800]	18034	Q9WTK5;Q3UG25;Q3UV15
ENSMUSG00000039735	6563.82	470.508	12657.1	26.901	4.74959	1.49933e-266	7.985e-264	3	122332368	122413364	-	12376	Fnbp1l	GO:0005886;GO:0005938;GO:0006897;GO:0007165;GO:0016020;GO:0005737;GO:0005856;GO:0005886;GO:0006897;GO:0006897;GO:0006914;GO:0007165;GO:0016020;GO:0005737;GO:0005856;GO:0005886;GO:0006897;GO:0006897;GO:0006914;GO:0007165;GO:0016020;GO:0005737;GO:0005856;GO:0005886;GO:0006897;GO:0006897;GO:0006914;GO:0007165;GO:0016020;	K20121	-	Z	0WG1G;13BRZ;0INNW;0E7SQ;1DESI;1972S;0B3MK;1BASG;0V2UB	formin binding protein 1-like [Source:MGI Symbol;Acc:MGI:1925642]	214459	E9PUI5
ENSMUSG00000020178	1489.66	5.54135	2973.78	536.653	9.06785	5.89684e-266	3.03219e-263	10	75152711	75170618	+	3062	Adora2a	GO:0001609;GO:0001609;GO:0001609;GO:0001963;GO:0001973;GO:0001973;GO:0001973;GO:0001975;GO:0004930;GO:0004930;GO:0005515;GO:0005882;GO:0005882;GO:0005886;GO:0005886;GO:0005886;GO:0005887;GO:0006355;GO:0006355;GO:0006469;GO:0006469;GO:0007165;GO:0007186;GO:0007186;GO:0007186;GO:0007189;GO:0007189;GO:0007205;GO:0007205;GO:0007271;GO:0007271;GO:0007626;GO:0007626;GO:0008285;GO:0008285;GO:0012505;GO:…	K04266	-	T	KOG3656;13HH2;1CS68;09Y1D;0V8YY;0UJBG;18U0Z;0DHG2;1AVP3	adenosine A2a receptor [Source:MGI Symbol;Acc:MGI:99402]	11540	Q60613
ENSMUSG00000045664	1472.78	26.0927	2919.48	111.889	6.80592	7.97298e-257	3.9631e-254	19	5965664	5974844	-	3411	Cdc42ep2	GO:0001515;GO:0005096;GO:0005096;GO:0005737;GO:0005737;GO:0005737;GO:0005737;GO:0005829;GO:0005829;GO:0005856;GO:0005856;GO:0005886;GO:0005886;GO:0005886;GO:0007266;GO:0008360;GO:0008360;GO:0008360;GO:0008360;GO:0012505;GO:0015630;GO:0015630;GO:0016020;GO:0016020;GO:0016020;GO:0030036;GO:0030036;GO:0030838;GO:0030838;GO:0030838;GO:0031267;GO:0031267;GO:0031267;GO:0031274;GO:0031274;GO:0031274;GO:…	-	-	Z;T	0A27G;0VD3D;0IZS0;13TCJ;0UIG6;1B2CA;1CYV4;0DPVK;19509	CDC42 effector protein (Rho GTPase binding) 2 [Source:MGI Symbol;Acc:MGI:1929744]	104252	Q8JZX9
ENSMUSG00000044701	3006.19	8.81064	6003.56	681.399	9.41236	9.91208e-256	4.76803e-253	7	126188182	126194113	-	1021	Il27	GO:0002230;GO:0002376;GO:0005102;GO:0005125;GO:0005515;GO:0005576;GO:0005576;GO:0005615;GO:0005615;GO:0005615;GO:0005829;GO:0006954;GO:0007165;GO:0009617;GO:0032729;GO:0032729;GO:0042129;GO:0042129;GO:0042129;GO:0045087;GO:0045523;GO:0045523;GO:0045523;GO:0045625;GO:0045625;GO:0045625;	K22629	-	O;T	13M44;1CZMY;0URNF;0A55J;1B15I;0IKKP;19347;0DQJE;0VF6E	interleukin 27 [Source:MGI Symbol;Acc:MGI:2384409]	246779	Q8K3I6
ENSMUSG00000058427	58054.9	45.4068	116064	2556.1	11.3197	1.23918e-255	5.77459e-253	5	91051730	91053797	+	2068	Cxcl2	GO:0005125;GO:0005576;GO:0005576;GO:0005615;GO:0006935;GO:0006935;GO:0006952;GO:0006955;GO:0007165;GO:0008009;GO:0060326;GO:0001975;GO:0002237;GO:0005125;GO:0005576;GO:0005576;GO:0005615;GO:0005615;GO:0005615;GO:0005615;GO:0006935;GO:0006935;GO:0006952;GO:0006954;GO:0006954;GO:0006955;GO:0007165;GO:0007204;GO:0007204;GO:0008009;GO:0008009;GO:0008009;GO:0008009;GO:0009408;GO:0010332;GO:0030593;GO:…	K05505	-	S;W	0DVJX;1D4WZ;0J3WE;1B6Q4;0VKBQ;13XHT;0A9A4;0UWC6	chemokine (C-X-C motif) ligand 2 [Source:MGI Symbol;Acc:MGI:1340094]	20310	P10889;Q3U1J5
ENSMUSG00000035042	6541.36	13.2931	13069.4	983.176	9.94131	4.26978e-252	1.92942e-249	11	83416604	83421344	-	960	Ccl5	GO:0000165;GO:0002230;GO:0002548;GO:0004435;GO:0004672;GO:0005125;GO:0005515;GO:0005576;GO:0005576;GO:0005615;GO:0005615;GO:0005615;GO:0005737;GO:0006816;GO:0006874;GO:0006887;GO:0006935;GO:0006954;GO:0006954;GO:0006954;GO:0006955;GO:0007159;GO:0007159;GO:0007165;GO:0007186;GO:0007186;GO:0007186;GO:0007267;GO:0007267;GO:0008009;GO:0008009;GO:0008009;GO:0008009;GO:0008201;GO:0009636;GO:0010628;GO:…	K12499	-	T;V	0A9BH;0VK8C;1D4V5;1B6N1;0J0XH;0DVII;193QG;0UWA5;13UMY	chemokine (C-C motif) ligand 5 [Source:MGI Symbol;Acc:MGI:98262]	20304	P30882;Q5XZF2
ENSMUSG00000043953	6637.6	538.319	12736.9	23.6605	4.56441	4.7416e-252	2.07961e-249	9	110883554	110886587	-	2598	Ccrl2	GO:0004930;GO:0004930;GO:0004950;GO:0005737;GO:0005886;GO:0005887;GO:0005887;GO:0006935;GO:0006954;GO:0006954;GO:0006955;GO:0007165;GO:0007186;GO:0007186;GO:0007204;GO:0009897;GO:0016020;GO:0016021;GO:0016021;GO:0016493;GO:0016493;GO:0019722;GO:0019957;GO:0042379;GO:0042379;GO:0048020;GO:0060326;GO:0070098;GO:0004930;GO:0004930;GO:0004950;GO:0005737;GO:0005886;GO:0005887;GO:0005887;GO:0006935;GO:…	K08373	-	T	0A3FQ;13NJS;194AK;1D07T;0VDFJ;1B049;0IKE4;0DR2W;0UU54	chemokine (C-C motif) receptor-like 2 [Source:MGI Symbol;Acc:MGI:1920904]	54199	O35457
ENSMUSG00000044162	3679.44	239.505	7119.38	29.7254	4.89362	1.74333e-251	7.42757e-249	6	65502297	65611024	+	10916	Tnip3	GO:0002756;GO:0031593;GO:0031593;GO:0034142;GO:0043124;GO:0043124;GO:0045944;GO:0071222;GO:0071222;GO:0002756;GO:0031593;GO:0031593;GO:0034142;GO:0043124;GO:0043124;GO:0045944;GO:0071222;GO:0071222;GO:0002756;GO:0031593;GO:0031593;GO:0034142;GO:0043124;GO:0043124;GO:0045944;GO:0071222;GO:0071222;	K23836	-	S;T	12NSU;193X3;0IGHG;0DMM2;0A01H;1CWGH;0UIGH;1B06Y;0VAY2	TNFAIP3 interacting protein 3 [Source:MGI Symbol;Acc:MGI:3041165]	414084	Q3SXA6
ENSMUSG00000035356	12774.6	208.553	25340.6	121.507	6.92489	7.21361e-251	2.98804e-248	16	55631738	55659262	-	5018	Nfkbiz	GO:0005515;GO:0005634;GO:0005634;GO:0005634;GO:0006954;GO:0010468;GO:0016607;GO:0036464;GO:0050729;GO:0050852;GO:2000321;GO:0005515;GO:0005634;GO:0005634;GO:0005634;GO:0006954;GO:0010468;GO:0016607;GO:0016607;GO:0036464;GO:0036464;GO:0050729;GO:0050729;GO:0050852;GO:2000321;GO:0005515;GO:0005634;GO:0005634;GO:0005634;GO:0006954;GO:0010468;GO:0016607;GO:0036464;GO:0050729;GO:0050852;GO:2000321;GO:…	K14242	-	K;E	0DKBA;KOG0504;1CV54;18W3F;1AZBI;13JN0;09YW3;0V9TX;0UP8E	nuclear factor of kappa light polypeptide gene enhancer in B cells inhibitor, zeta [Source:MGI Symbol;Acc:MGI:1931595]	80859	Q9EST8
ENSMUSG00000055994	1488.42	46.1402	2930.69	63.5171	5.98907	4.64359e-243	1.87149e-240	8	89373943	89415102	+	5014	Nod2	GO:0005515;GO:0005737;GO:0006259;GO:0016888;GO:0032495;GO:0032731;GO:0042981;GO:0000166;GO:0002221;GO:0002221;GO:0002227;GO:0002253;GO:0002367;GO:0002376;GO:0002606;GO:0002710;GO:0002732;GO:0002732;GO:0002830;GO:0002830;GO:0002830;GO:0002862;GO:0002925;GO:0003779;GO:0003779;GO:0005515;GO:0005524;GO:0005737;GO:0005737;GO:0005737;GO:0005737;GO:0005737;GO:0005794;GO:0005794;GO:0005829;GO:0005829;GO:…	K10165	-	T;I	1CVNP;0UKPP;12SQR;0DKTS;KOG4308;0VA8J;18TGR;1B0TD;09ZBD	nucleotide-binding oligomerization domain containing 2 [Source:MGI Symbol;Acc:MGI:2429397]	257632	Q80SY9
ENSMUSG00000002699	7961.43	730.978	15191.9	20.783	4.37733	3.46885e-241	1.36125e-238	11	33996920	34042295	+	4459	Lcp2	GO:0005515;GO:0005515;GO:0005737;GO:0005829;GO:0005829;GO:0005829;GO:0005911;GO:0007169;GO:0035556;GO:0036398;GO:0036398;GO:0044853;GO:0044853;GO:0045576;GO:0045860;GO:0050852;GO:0050852;	K07361	-	-	-	lymphocyte cytosolic protein 2 [Source:MGI Symbol;Acc:MGI:1321402]	16822	Q60787
ENSMUSG00000050395	953.162	5.12669	1901.2	370.843	8.53467	2.02841e-240	7.7558e-238	4	63642840	63663350	-	5828	Tnfsf15	GO:0005164;GO:0005576;GO:0006915;GO:0006955;GO:0007165;GO:0016020;GO:0016020;	K05478	-	T	1CQ9X;18TDI;1ASMK;0V59S;0IFSK;09UAN;0UG1W;13NWF;0DFK9	tumor necrosis factor (ligand) superfamily, member 15 [Source:MGI Symbol;Acc:MGI:2180140]	326623	Q5UBV8;A0A0U5J7F3;B2RR33
ENSMUSG00000022534	1828.44	85.8206	3571.06	41.6108	5.37888	2.62191e-234	9.77447e-232	16	3525082	3535961	-	3251	Mefv	GO:0001726;GO:0002376;GO:0003779;GO:0003779;GO:0005634;GO:0005634;GO:0005654;GO:0005654;GO:0005737;GO:0005737;GO:0005737;GO:0005776;GO:0005829;GO:0005829;GO:0005856;GO:0005874;GO:0005875;GO:0005875;GO:0006954;GO:0006954;GO:0008270;GO:0008270;GO:0010468;GO:0010508;GO:0010508;GO:0016567;GO:0030027;GO:0031410;GO:0032691;GO:0032695;GO:0034341;GO:0034341;GO:0042802;GO:0042995;GO:0045087;GO:0045087;GO:…	K12803	-	Z;O	KOG2177;0DIW5;1CW0W;13IA3;0UQ9E;0VAIS;19238;1B4AS;09ZN3	Mediterranean fever [Source:MGI Symbol;Acc:MGI:1859396]	54483	Q9JJ26
ENSMUSG00000029380	49606.6	33.2343	99179.9	2984.26	11.5432	2.52445e-233	9.1816e-231	5	91039100	91040974	+	1875	Cxcl1	GO:0002237;GO:0002526;GO:0005125;GO:0005576;GO:0005576;GO:0005615;GO:0005615;GO:0005615;GO:0005615;GO:0006935;GO:0006935;GO:0006952;GO:0006954;GO:0006954;GO:0006955;GO:0007165;GO:0007204;GO:0008009;GO:0008009;GO:0008009;GO:0008083;GO:0010765;GO:0030593;GO:0030593;GO:0031640;GO:0032930;GO:0043268;GO:0045236;GO:0060326;GO:0061844;GO:0061844;GO:0070098;GO:0070965;GO:0071222;GO:1902035;	K05505	-	S;W	0DVJX;1D4WZ;19409;0J3WE;1B6Q4;0VKBQ;13XHT;0A9A4;0UWC6	chemokine (C-X-C motif) ligand 1 [Source:MGI Symbol;Acc:MGI:108068]	14825	P12850;A2RTH0
ENSMUSG00000033066	6029.01	570.913	11487.1	20.1206	4.3306	1.52563e-229	5.41673e-227	11	67345917	67579816	+	11688	Gas7	-	K18618	-	Z;O;D	1BBMD;0B6PI;KOG0940;197I5;KOG2398;0E9PU;0V3ZP;13GJE;0WJEW;1DGIE	growth arrest specific 7 [Source:MGI Symbol;Acc:MGI:1202388]	14457	Q3U432;Q3U8N2
ENSMUSG00000016528	18592.8	2112.91	35072.8	16.5993	4.05305	7.82029e-227	2.71201e-224	1	130981437	131025563	-	3041	Mapkapk2	GO:0000166;GO:0002224;GO:0002224;GO:0004672;GO:0004674;GO:0004674;GO:0004674;GO:0004683;GO:0005515;GO:0005515;GO:0005516;GO:0005524;GO:0005524;GO:0005634;GO:0005634;GO:0005634;GO:0005634;GO:0005654;GO:0005654;GO:0005737;GO:0005737;GO:0005737;GO:0005737;GO:0005813;GO:0005813;GO:0006468;GO:0006468;GO:0006954;GO:0006954;GO:0006974;GO:0006974;GO:0006974;GO:0009931;GO:0016301;GO:0016310;GO:0016740;GO:…	K04443	EC:2.7.11.1	T	18VKH;1CUI6;0UNIH;12PZ5;KOG0604;0DJR3;1B31G;09YBC;0V7I5	MAP kinase-activated protein kinase 2 [Source:MGI Symbol;Acc:MGI:109298]	17164	P49138;Q3U2P8
ENSMUSG00000026981	5019.87	479.054	9560.68	19.9574	4.31885	5.34742e-223	1.81229e-220	2	24226865	24241506	+	5535	Il1rn	GO:0001660;GO:0002437;GO:0005125;GO:0005125;GO:0005149;GO:0005149;GO:0005149;GO:0005150;GO:0005151;GO:0005152;GO:0005152;GO:0005152;GO:0005576;GO:0005576;GO:0005615;GO:0005615;GO:0005615;GO:0005737;GO:0006629;GO:0006953;GO:0006954;GO:0006954;GO:0006955;GO:0007165;GO:0007613;GO:0014050;GO:0019233;GO:0030073;GO:0030336;GO:0031982;GO:0034115;GO:0043066;GO:0043507;GO:0045352;GO:0045353;GO:0045837;GO:…	K05481	-	W;T	13TYV;0A4QH;0VFJK;0DS6S;192T2;1D1FU;0URDG;0IZQ4;1B5Q8	interleukin 1 receptor antagonist [Source:MGI Symbol;Acc:MGI:96547]	16181	P25085;Q542C7
ENSMUSG00000026031	13050.4	1523.97	24576.9	16.1269	4.0114	8.29546e-219	2.74893e-216	1	58750667	58798043	+	12669	Cflar	GO:0001666;GO:0002020;GO:0002020;GO:0004197;GO:0005123;GO:0005737;GO:0006508;GO:0006915;GO:0008047;GO:0008234;GO:0010667;GO:0010976;GO:0031264;GO:0031264;GO:0031265;GO:0032869;GO:0033574;GO:0042981;GO:0043066;GO:0043123;GO:0044877;GO:0045121;GO:0060544;GO:0070374;GO:0071364;GO:0071392;GO:0071456;GO:0071549;GO:0071732;GO:0072126;GO:0097342;GO:1902042;GO:1903055;GO:1903427;GO:1903845;GO:1903944;GO:…	K04724	-	D	1AS4Y;0VANN;18WP8;0DMAB;13HU3;1CW5I;09ZS9;0UQFM;KOG3573	CASP8 and FADD-like apoptosis regulator [Source:MGI Symbol;Acc:MGI:1336166]	12633	O35732;Q812G4
ENSMUSG00000023947	3038.74	247.524	5829.95	23.5531	4.55784	2.60191e-218	8.43472e-216	17	45866629	45874095	+	3045	Nfkbie	GO:0001650;GO:0005515;GO:0005654;GO:0005737;GO:0005794;GO:0005829;GO:0042942;GO:0045892;GO:0048471;GO:0001650;GO:0005654;GO:0005794;GO:0005829;GO:0042942;GO:0048471;	K05872	-	K;E	0UQCI;0DQII;KOG0504;0VC0J;13M39;1CZKX;18W50;0A2AC;1AV6R	nuclear factor of kappa light polypeptide gene enhancer in B cells inhibitor, epsilon [Source:MGI Symbol;Acc:MGI:1194908]	18037	O54910
ENSMUSG00000028634	4012.68	201.637	7823.72	38.801	5.27802	1.68458e-212	5.34479e-210	4	119590981	119995242	+	17627	Hivep3	GO:0000978;GO:0000981;GO:0003677;GO:0005634;GO:0005634;GO:0005634;GO:0005737;GO:0005829;GO:0006357;GO:0035914;GO:0045893;GO:0045893;GO:0046872;GO:0000978;GO:0000981;GO:0003677;GO:0005634;GO:0005634;GO:0005634;GO:0005737;GO:0005829;GO:0006357;GO:0035914;GO:0045893;GO:0046872;	K09239	-	K	09WFV;0V7ED;0UJZX;KOG1721;1CSFQ;0DHRC;13FBN;192BT;1AZDT	human immunodeficiency virus type I enhancer binding protein 3 [Source:MGI Symbol;Acc:MGI:106589]	16656	A2A884
ENSMUSG00000074622	3785.47	7265.08	305.863	0.0421005	-4.57002	4.69528e-210	1.45867e-207	2	160205623	160208985	-	3363	Mafb	GO:0000978;GO:0000978;GO:0000981;GO:0000981;GO:0000981;GO:0001228;GO:0003677;GO:0003677;GO:0003677;GO:0003700;GO:0005515;GO:0005515;GO:0005634;GO:0005634;GO:0005634;GO:0005634;GO:0005634;GO:0005654;GO:0005667;GO:0006355;GO:0006355;GO:0006355;GO:0006357;GO:0006357;GO:0007379;GO:0007585;GO:0008134;GO:0008134;GO:0021571;GO:0021572;GO:0021599;GO:0033077;GO:0035284;GO:0042472;GO:0042802;GO:0042802;GO:…	K09036	-	K	1B179;0DM6M;0VAJN;0URB0;1950H;KOG4196;13UZ2;09ZNW;1CW1U	v-maf musculoaponeurotic fibrosarcoma oncogene family, protein B (avian) [Source:MGI Symbol;Acc:MGI:104555]	16658	P54841
ENSMUSG00000028163	13113.9	1637.94	24589.9	15.0126	3.90811	5.96354e-210	1.81486e-207	3	135290416	135397308	-	12061	Nfkb1	GO:0000122;GO:0000122;GO:0000122;GO:0000785;GO:0000976;GO:0000976;GO:0000976;GO:0000977;GO:0000977;GO:0000978;GO:0000978;GO:0000978;GO:0000981;GO:0001225;GO:0001227;GO:0001227;GO:0001228;GO:0001228;GO:0001818;GO:0003677;GO:0003677;GO:0003677;GO:0003682;GO:0003690;GO:0003700;GO:0003700;GO:0003700;GO:0003700;GO:0005515;GO:0005515;GO:0005634;GO:0005634;GO:0005634;GO:0005634;GO:0005654;GO:0005654;GO:…	K02580	-	K;E	0UGN0;0VD3P;KOG0504;0A3C4;1AWWW;1CTIN;0DITA;18SWP;13GBI	nuclear factor of kappa light polypeptide gene enhancer in B cells 1, p105 [Source:MGI Symbol;Acc:MGI:97312]	18033	P25799
ENSMUSG00000029084	954.784	22.3813	1887.19	84.32	6.3978	8.7926e-210	2.62231e-207	5	44025895	44069717	+	3890	Cd38	GO:0001666;GO:0001666;GO:0003953;GO:0003953;GO:0003953;GO:0003953;GO:0005634;GO:0005634;GO:0005886;GO:0005886;GO:0005886;GO:0005886;GO:0007204;GO:0007204;GO:0007565;GO:0008284;GO:0008284;GO:0009725;GO:0009725;GO:0009986;GO:0010977;GO:0010977;GO:0014824;GO:0014824;GO:0016020;GO:0016020;GO:0016021;GO:0016323;GO:0016323;GO:0016740;GO:0016787;GO:0016798;GO:0016849;GO:0016849;GO:0030307;GO:0030307;GO:…	K01242	-	M;T	09UGC;18Z8J;0IH8E;0UR65;0DNUA;1B4WD;12TG0;0VC2H;1CXRM	CD38 antigen [Source:MGI Symbol;Acc:MGI:107474]	12494	P56528;Q4FJL8;Q3UCS6
ENSMUSG00000042349	4710.38	495.39	8925.37	18.0168	4.17127	1.0208e-208	2.98475e-206	1	131182080	131207344	-	9018	Ikbke	GO:0000166;GO:0004672;GO:0004674;GO:0004674;GO:0004704;GO:0004704;GO:0004704;GO:0005515;GO:0005524;GO:0005524;GO:0005634;GO:0005634;GO:0005634;GO:0005737;GO:0005737;GO:0005737;GO:0005737;GO:0006468;GO:0006468;GO:0006468;GO:0006468;GO:0006974;GO:0007252;GO:0008384;GO:0008384;GO:0008630;GO:0008630;GO:0008630;GO:0010884;GO:0016301;GO:0016310;GO:0016605;GO:0016605;GO:0016605;GO:0016740;GO:0018105;GO:…	K07211	EC:2.7.11.10	T	0USJT;09XJY;0V8HW;1CTP1;KOG4250;12QKK;18SIA;0DIXJ;1AUCC	inhibitor of kappaB kinase epsilon [Source:MGI Symbol;Acc:MGI:1929612]	56489	Q9R0T8
ENSMUSG00000024789	4368.49	461.563	8275.42	17.9291	4.16423	8.61507e-206	2.47054e-203	19	29229228	29290480	+	5030	Jak2	GO:0000166;GO:0004672;GO:0004713;GO:0004713;GO:0004715;GO:0004715;GO:0005524;GO:0005524;GO:0005634;GO:0005856;GO:0005856;GO:0006325;GO:0006468;GO:0012505;GO:0016020;GO:0016020;GO:0016301;GO:0016310;GO:0016740;GO:0035556;GO:0042393;GO:0000166;GO:0000186;GO:0000791;GO:0004672;GO:0004713;GO:0004713;GO:0004713;GO:0004713;GO:0004715;GO:0004715;GO:0005102;GO:0005131;GO:0005524;GO:0005524;GO:0005634;GO:…	K04447	EC:2.7.10.2	T;B	12TI0;0UM1R;1948N;0V7H4;KOG0197;1B1I3;09WIK;1CT85;0DG6K	Janus kinase 2 [Source:MGI Symbol;Acc:MGI:96629]	16452	Q62120
ENSMUSG00000028266	4173.64	447.362	7899.92	17.6589	4.14232	1.90083e-202	5.34815e-200	3	143894291	143910981	-	3530	Lmo4	GO:0001843;GO:0001843;GO:0003281;GO:0005515;GO:0005515;GO:0005634;GO:0006357;GO:0008134;GO:0008134;GO:0021514;GO:0021522;GO:0021527;GO:0030334;GO:0031252;GO:0031333;GO:0033674;GO:0042659;GO:0045944;GO:0046872;GO:0048538;GO:0050865;GO:0090575;GO:0001843;GO:0001843;GO:0003281;GO:0005515;GO:0005515;GO:0005634;GO:0006357;GO:0008134;GO:0008134;GO:0021514;GO:0021522;GO:0021527;GO:0030334;GO:0031252;GO:…	K24099	-	K	13RR8;1CR25;0V62V;0UI3B;09V3A;0DGCP;18TWR;KOG0490;1ATP1	LIM domain only 4 [Source:MGI Symbol;Acc:MGI:109360]	16911	P61969;Q542S1
ENSMUSG00000102037	1312.01	65.0363	2558.98	39.347	5.29818	7.54895e-202	2.08463e-199	9	88838953	88844472	+	819	Bcl2a1a	GO:0001782;GO:0002903;GO:0005515;GO:0005515;GO:0005737;GO:0005741;GO:0006915;GO:0008630;GO:0042803;GO:0042981;GO:0043066;GO:0043066;GO:0044877;GO:0046982;GO:0051400;GO:0097192;	K02162	-	T	192MA;1CPFD;0A0GW;0DERK;0UFS5;KOG4728;1ARKX;0V569;13S3B	B cell leukemia/lymphoma 2 related protein A1a [Source:MGI Symbol;Acc:MGI:102687]	12044	Q07440
ENSMUSG00000003617	859.299	21.7816	1696.82	77.9015	6.28358	8.07625e-195	2.18969e-192	3	20011218	20063309	+	9566	Cp	GO:0004322;GO:0004322;GO:0004322;GO:0005507;GO:0005507;GO:0005576;GO:0005615;GO:0005615;GO:0005886;GO:0006811;GO:0006825;GO:0006826;GO:0016491;GO:0016491;GO:0016491;GO:0046658;GO:0046688;GO:0046872;GO:0051087;GO:0055072;GO:0055114;GO:0055114;GO:0005507;GO:0006825;GO:0016491;GO:0016491;GO:0046872;GO:0055114;GO:0055114;GO:0005507;GO:0006825;GO:0016491;GO:0016491;GO:0046872;GO:0055114;GO:0055114;GO:…	K13624	EC:1.16.3.1	Q	09WF8;192EK;0UPN2;KOG1263;12Q6R;1AZC8;1CSYR;0DI8B;0V7VZ	ceruloplasmin [Source:MGI Symbol;Acc:MGI:88476]	12870	Q61147
ENSMUSG00000024772	12779.7	361.072	25198.4	69.7877	6.1249	2.72014e-192	7.24334e-190	19	6326755	6350126	+	3705	Ehd1	GO:0000166;GO:0005509;GO:0005515;GO:0005524;GO:0005525;GO:0005768;GO:0005768;GO:0005769;GO:0005769;GO:0005811;GO:0005886;GO:0005886;GO:0005886;GO:0005929;GO:0006886;GO:0006886;GO:0006897;GO:0006897;GO:0010008;GO:0010008;GO:0010008;GO:0010886;GO:0010976;GO:0010976;GO:0015031;GO:0016020;GO:0016197;GO:0016197;GO:0020018;GO:0020018;GO:0030030;GO:0030139;GO:0030139;GO:0031095;GO:0031175;GO:0031175;GO:…	K12483	-	T;U	0V6UU;1CTEH;0USGH;1B57K;09XC5;12N3T;1923G;KOG1954;0DIPJ	EH-domain containing 1 [Source:MGI Symbol;Acc:MGI:1341878]	13660	Q9WVK4;Q80ZZ0
ENSMUSG00000055202	861.171	25.4038	1696.94	66.7985	6.06174	6.40126e-189	1.67466e-186	17	33014650	33028905	-	3555	Zfp811	GO:0000977;GO:0000981;GO:0005634;GO:0006355;GO:0006357;GO:0046872;GO:0000977;GO:0000981;GO:0005634;GO:0006355;GO:0006357;GO:0046872;GO:0000977;GO:0000981;GO:0005634;GO:0006355;GO:0006357;	K09228	-	K	KOG1721	zinc finger protein 811 [Source:MGI Symbol;Acc:MGI:2682944]	240063	A0A3Q4EGT7
ENSMUSG00000027035	12739.9	1882.27	23597.5	12.5367	3.64809	1.99791e-187	5.13669e-185	2	68691785	68944626	+	8875	Cers6	GO:0003677;GO:0005515;GO:0005783;GO:0005783;GO:0005783;GO:0005789;GO:0006629;GO:0006665;GO:0006954;GO:0016020;GO:0016021;GO:0016021;GO:0016410;GO:0016740;GO:0030148;GO:0046513;GO:0046513;GO:0046513;GO:0050291;GO:0050291;GO:0050291;GO:0003677;GO:0003677;GO:0005634;GO:0005783;GO:0005789;GO:0006629;GO:0006665;GO:0016020;GO:0016021;GO:0016021;GO:0016740;GO:0046513;GO:0050291;	K23727	EC:2.3.1.291	U	0DJDW;18ZTA;12XI5;0UTVB;0V8YA;1B4WG;KOG1607;1CZKR;09Y0R	ceramide synthase 6 [Source:MGI Symbol;Acc:MGI:2442564]	241447	Q8C172
ENSMUSG00000099974	1081.43	53.1414	2109.73	39.7003	5.31108	1.276e-185	3.22503e-183	9	88605338	88613967	-	863	Bcl2a1d	GO:0005741;GO:0006915;GO:0008630;GO:0030217;GO:0042803;GO:0042981;GO:0043027;GO:0043066;GO:0043154;GO:0044877;GO:0046982;GO:0050852;GO:0051400;GO:0097192;	K02162	-	T	192MA;1CPFD;0A0GW;0DERK;0UFS5;KOG4728;1ARKX;0V569;13S3B	B cell leukemia/lymphoma 2 related protein A1d [Source:MGI Symbol;Acc:MGI:1278325]	12047	O55179
ENSMUSG00000027646	2217.31	216.404	4218.22	19.4924	4.28484	1.3369e-184	3.32263e-182	2	157260364	157313782	+	4371	Src	GO:0000166;GO:0004672;GO:0004713;GO:0004713;GO:0004715;GO:0005524;GO:0005524;GO:0006468;GO:0016301;GO:0016310;GO:0016740;GO:0018108;GO:0000166;GO:0004672;GO:0004713;GO:0004713;GO:0004715;GO:0005524;GO:0005524;GO:0006468;GO:0016301;GO:0016310;GO:0016740;GO:0018108;GO:0000166;GO:0001545;GO:0001545;GO:0001819;GO:0002102;GO:0002376;GO:0004672;GO:0004672;GO:0004672;GO:0004713;GO:0004713;GO:0004713;GO:…	K05704	EC:2.7.10.2	T	09UFI;1CY0J;1B2R2;12R0Y;KOG0197;0UMIY;0DMK2;18X31;0V649	Rous sarcoma oncogene [Source:MGI Symbol;Acc:MGI:98397]	20779	P05480
ENSMUSG00000040339	5772.24	668.276	10876.2	16.275	4.02459	1.20471e-182	2.94502e-180	3	108878313	108934923	-	5702	Fam102b	GO:0003674;GO:0005575;GO:0008150;	-	-	S	12RVZ;1CPF3;0V4DA;0IWVB;1AX52;0UFRV;0DERB;09TE6;190Q3	family with sequence similarity 102, member B [Source:MGI Symbol;Acc:MGI:3036259]	329739	Q8BQS4;E9Q4R1
ENSMUSG00000032000	3478.17	422.894	6533.44	15.4494	3.94948	1.59127e-181	3.82725e-179	9	7848700	7873187	-	5009	Birc3	GO:0005634;GO:0005737;GO:0007283;GO:0032991;GO:0042981;GO:0044877;GO:0045121;GO:0046872;GO:0005737;	K16060	-	O;T;D	09XU3;13HTW;KOG1101;1AXBT;0DJ69;0UH8Q;0V8RR;1CTY4;194HC	baculoviral IAP repeat-containing 3 [Source:MGI Symbol;Acc:MGI:1197007]	11796	O08863;A2CGA5;Q3TSE5
ENSMUSG00000020134	4875.39	649.681	9101.1	14.0086	3.80824	4.76502e-180	1.12787e-177	11	21041291	21100323	+	6553	Peli1	GO:0000209;GO:0000209;GO:0000209;GO:0000778;GO:0001819;GO:0004842;GO:0005515;GO:0005515;GO:0005634;GO:0008063;GO:0008063;GO:0008592;GO:0016567;GO:0016740;GO:0030890;GO:0031398;GO:0032088;GO:0032496;GO:0034141;GO:0034145;GO:0042130;GO:0043123;GO:0043161;GO:0043161;GO:0043331;GO:0050868;GO:0050871;GO:0060546;GO:0060546;GO:0061630;GO:0061630;GO:0061630;GO:0061630;GO:0070534;GO:0070534;GO:0070936;GO:…	K11964	EC:2.3.2.27	T	0DNAJ;KOG3842;0VBJD;1CX7H;12TB1;1B2V7;18YWZ;0A0P6;0UIUF	pellino 1 [Source:MGI Symbol;Acc:MGI:1914495]	67245	Q8C669;Q5SRW7
ENSMUSG00000048621	1067.56	27.7992	2107.32	75.8047	6.24422	3.64249e-179	8.48699e-177	X	108240362	108244045	+	2795	Gm6377	GO:0003674;GO:0005575;GO:0034121;GO:0035751;GO:0003674;GO:0005575;GO:0034121;GO:0035751;	-	-	S	0IVMI;1CZX6;0A365;1AU7J;0DQTI;195VU;13IGV;0UQ4U;0VE12	predicted gene 6377 [Source:MGI Symbol;Acc:MGI:3647255]	622976	Q8BHV4
ENSMUSG00000026360	1358	2641.08	74.9098	0.0283633	-5.13983	3.75766e-179	8.62066e-177	1	143875076	143879899	-	3627	Rgs2	GO:0001965;GO:0001965;GO:0001975;GO:0005096;GO:0005096;GO:0005096;GO:0005096;GO:0005515;GO:0005634;GO:0005634;GO:0005634;GO:0005730;GO:0005737;GO:0005737;GO:0005737;GO:0005737;GO:0005829;GO:0005829;GO:0005829;GO:0005886;GO:0005886;GO:0005886;GO:0005886;GO:0006417;GO:0007049;GO:0007186;GO:0007283;GO:0007420;GO:0008277;GO:0008277;GO:0008277;GO:0009898;GO:0009898;GO:0009898;GO:0009968;GO:0010519;GO:…	K18154	-	T	18WT3;0DMVA;1CWQX;0VB4N;0UR2N;1B319;13HZP;KOG3589;0A08R	regulator of G-protein signaling 2 [Source:MGI Symbol;Acc:MGI:1098271]	19735	O08849
ENSMUSG00000038068	1299.7	2529.99	69.4047	0.0274328	-5.18795	3.76006e-177	8.49545e-175	13	47276132	47401467	+	4936	Rnf144b	GO:0000151;GO:0000209;GO:0004842;GO:0004842;GO:0004842;GO:0005737;GO:0005737;GO:0005737;GO:0005737;GO:0005739;GO:0006511;GO:0006511;GO:0006511;GO:0006915;GO:0016020;GO:0016021;GO:0016567;GO:0016567;GO:0016740;GO:0031624;GO:0031966;GO:0031966;GO:0031966;GO:0031966;GO:0032436;GO:0043066;GO:0043066;GO:0043066;GO:0046872;GO:0061630;GO:0000151;GO:0000209;GO:0004842;GO:0004842;GO:0005737;GO:0005737;GO:…	K11975	EC:2.3.2.31	O	09X8A;12SXA;0URGI;0DN6D;KOG1815;18SF1;0V4D8;1CYJD;1ARPD	ring finger protein 144B [Source:MGI Symbol;Acc:MGI:2384986]	218215	Q8BKD6
ENSMUSG00000041135	2042.22	204.838	3879.6	18.9398	4.24335	6.49925e-177	1.44652e-174	4	16122733	16163647	-	2816	Ripk2	GO:0000166;GO:0001961;GO:0002250;GO:0002250;GO:0002376;GO:0002827;GO:0004672;GO:0004672;GO:0004674;GO:0004674;GO:0004706;GO:0004715;GO:0005102;GO:0005102;GO:0005524;GO:0005524;GO:0005737;GO:0005737;GO:0005737;GO:0005737;GO:0005829;GO:0005829;GO:0005829;GO:0005856;GO:0005856;GO:0005856;GO:0006468;GO:0006915;GO:0007249;GO:0007256;GO:0007257;GO:0010800;GO:0010800;GO:0010800;GO:0010942;GO:0010942;GO:…	K08846	EC:2.7.11.1	T	1CQA5;1AU4G;13IJ2;0UIKS;09VGK;KOG0192;18T41;0DFKG;0V6FS	receptor (TNFRSF)-interacting serine-threonine kinase 2 [Source:MGI Symbol;Acc:MGI:1891456]	192656	P58801;Q547H1
ENSMUSG00000026827	4023.99	537.665	7510.32	13.9684	3.80409	4.548e-176	9.97349e-174	2	57127647	57260731	+	6549	Gpd2	GO:0004367;GO:0004368;GO:0004368;GO:0005509;GO:0005739;GO:0005739;GO:0005739;GO:0005743;GO:0005743;GO:0006072;GO:0006072;GO:0006094;GO:0006734;GO:0009331;GO:0009331;GO:0016020;GO:0016491;GO:0016491;GO:0019563;GO:0035264;GO:0043010;GO:0046872;GO:0052590;GO:0052591;GO:0055114;GO:0055114;GO:0004368;GO:0004368;GO:0005509;GO:0005739;GO:0005739;GO:0006072;GO:0006072;GO:0009331;GO:0009331;GO:0016491;GO:…	K00111	EC:1.1.5.3	C	0DJQJ;1B005;09YAY;12R1Y;KOG0042;1CUHJ;18T86;0V6XB;0UNHD	glycerol phosphate dehydrogenase 2, mitochondrial [Source:MGI Symbol;Acc:MGI:99778]	14571	Q64521
ENSMUSG00000027776	613.279	0.352975	1226.21	3473.92	11.7623	1.011e-175	2.18493e-173	3	68597977	68605880	+	1701	Il12a	GO:0001916;GO:0002860;GO:0005125;GO:0005125;GO:0005143;GO:0005576;GO:0005576;GO:0005615;GO:0005615;GO:0006955;GO:0007050;GO:0007165;GO:0008083;GO:0008083;GO:0008083;GO:0009615;GO:0010224;GO:0016477;GO:0032496;GO:0032700;GO:0032729;GO:0032816;GO:0032946;GO:0034393;GO:0042163;GO:0042531;GO:0043514;GO:0045513;GO:0045785;GO:0045954;GO:0046982;GO:0048662;GO:0050671;GO:0050709;GO:0050830;GO:0051135;GO:…	K05406	-	W	0IVIR;0DQ86;13N0A;0URJP;0A2KK;0VDGJ;1B3YV;1CZ9U;193GN	interleukin 12a [Source:MGI Symbol;Acc:MGI:96539]	16159	P43431;Q549G3
ENSMUSG00000098557	8966.9	1413.49	16520.3	11.6876	3.54691	4.4392e-174	9.45676e-172	14	103214017	103220073	-	6057	Kctd12	GO:0042802;GO:0051260;	K21918	-	-	-	potassium channel tetramerisation domain containing 12 [Source:MGI Symbol;Acc:MGI:2145823]	239217	Q6WVG3;A0A0R4J2B2;Q8C2V2;Q69ZA6
ENSMUSG00000030403	9475.03	1495.62	17454.4	11.6704	3.54478	4.91763e-174	1.03284e-171	7	18990854	19005742	-	2617	Vasp	GO:0001843;GO:0001843;GO:0003779;GO:0003779;GO:0005515;GO:0005522;GO:0005522;GO:0005522;GO:0005737;GO:0005829;GO:0005829;GO:0005829;GO:0005856;GO:0005856;GO:0005886;GO:0005886;GO:0005886;GO:0005923;GO:0005925;GO:0005925;GO:0005925;GO:0007411;GO:0007411;GO:0008154;GO:0016020;GO:0017124;GO:0017124;GO:0017124;GO:0030027;GO:0030036;GO:0030036;GO:0030054;GO:0030175;GO:0030838;GO:0030838;GO:0030838;GO:…	K06274	-	Z;T	KOG4590;0VABX;1AZNP;09ZEV;13PCB;0DKX4;190ZD;1CVSC;0UPZ8	vasodilator-stimulated phosphoprotein [Source:MGI Symbol;Acc:MGI:109268]	22323	P70460
ENSMUSG00000040435	5233.32	763.949	9702.69	12.7007	3.66684	2.16351e-173	4.48087e-171	7	45172340	45175692	-	2937	Ppp1r15a	GO:0000164;GO:0000164;GO:0005737;GO:0005739;GO:0005739;GO:0005741;GO:0005783;GO:0005783;GO:0005783;GO:0005789;GO:0005794;GO:0006417;GO:0006915;GO:0008157;GO:0010628;GO:0016020;GO:0016020;GO:0019888;GO:0019888;GO:0019901;GO:0019903;GO:0030968;GO:0032515;GO:0032516;GO:0032516;GO:0033138;GO:0034976;GO:0034976;GO:0034976;GO:0035308;GO:0036496;GO:0045943;GO:0060734;GO:0070262;GO:0070972;GO:1902310;GO:…	K14019	-	T	0USCT;1CZEM;0ITE6;12TD0;0A2QW;1AW9F;0DQCM;0VDKN;193NM	protein phosphatase 1, regulatory subunit 15A [Source:MGI Symbol;Acc:MGI:1927072]	17872	P17564;B2RRL7
ENSMUSG00000003283	7086.16	1093.34	13079	11.9624	3.58043	7.6051e-173	1.55352e-170	2	152950388	152993361	+	2092	Hck	GO:0000166;GO:0001784;GO:0002376;GO:0004672;GO:0004713;GO:0004713;GO:0004713;GO:0004715;GO:0004715;GO:0005102;GO:0005515;GO:0005524;GO:0005524;GO:0005634;GO:0005654;GO:0005737;GO:0005764;GO:0005764;GO:0005794;GO:0005829;GO:0005856;GO:0005884;GO:0005884;GO:0005886;GO:0005886;GO:0005901;GO:0005901;GO:0005925;GO:0005925;GO:0006468;GO:0006887;GO:0006909;GO:0006909;GO:0006954;GO:0007169;GO:0008284;GO:…	K08893	EC:2.7.10.2	Z;T	18UEZ;0V4Q4;1AZTR;KOG0197;09TQU;0USB1;1CPQW;0DF11;12NBR	hemopoietic cell kinase [Source:MGI Symbol;Acc:MGI:96052]	15162	P08103
ENSMUSG00000037580	2885.46	359.794	5411.13	15.0395	3.91069	9.90289e-172	1.99557e-169	14	47391352	47426870	-	6251	Gch1	GO:0000166;GO:0003824;GO:0003924;GO:0003924;GO:0003934;GO:0003934;GO:0003934;GO:0003934;GO:0003934;GO:0003934;GO:0005509;GO:0005509;GO:0005525;GO:0005525;GO:0005525;GO:0005525;GO:0005525;GO:0005634;GO:0005634;GO:0005634;GO:0005654;GO:0005654;GO:0005737;GO:0005737;GO:0005737;GO:0005737;GO:0005829;GO:0005829;GO:0006729;GO:0006729;GO:0006729;GO:0006729;GO:0008152;GO:0008217;GO:0008217;GO:0008270;GO:…	K01495	EC:3.5.4.16	H	1CTUV;18VF5;KOG2698;1AUDU;0V7I8;13HKT;0DJ34;0UKZG;09WJK	GTP cyclohydrolase 1 [Source:MGI Symbol;Acc:MGI:95675]	14528	Q05915;Q3U7P6
ENSMUSG00000050578	11689.1	284.408	23093.7	81.1992	6.34339	2.14387e-170	4.26258e-168	9	7272514	7283331	+	2673	Mmp13	GO:0001958;GO:0001968;GO:0003417;GO:0004175;GO:0004222;GO:0004222;GO:0004222;GO:0005509;GO:0005509;GO:0005518;GO:0005518;GO:0005576;GO:0005576;GO:0005576;GO:0005615;GO:0005764;GO:0005794;GO:0006508;GO:0006508;GO:0006508;GO:0007507;GO:0008233;GO:0008233;GO:0008237;GO:0008237;GO:0008270;GO:0008270;GO:0008270;GO:0009725;GO:0016787;GO:0022617;GO:0022617;GO:0030198;GO:0030282;GO:0030282;GO:0030574;GO:…	K07994	EC:3.4.24.-	O;W	0DGSQ;KOG1565;0V6HA;1AUFS;09U0I;0UIYP;13GUN;18ZRE;1CRGU	matrix metallopeptidase 13 [Source:MGI Symbol;Acc:MGI:1340026]	17386	P33435;Q3U9V5
ENSMUSG00000045382	3088.94	5789.27	388.621	0.0671279	-3.89694	4.13522e-168	8.11373e-166	1	128515936	128520030	-	1808	Cxcr4	GO:0001666;GO:0001764;GO:0002064;GO:0003779;GO:0004930;GO:0004930;GO:0004950;GO:0005634;GO:0005737;GO:0005764;GO:0005764;GO:0005768;GO:0005768;GO:0005769;GO:0005769;GO:0005770;GO:0005770;GO:0005886;GO:0005886;GO:0005886;GO:0006935;GO:0007165;GO:0007186;GO:0007186;GO:0007186;GO:0008038;GO:0009986;GO:0014823;GO:0016020;GO:0016021;GO:0016021;GO:0016477;GO:0019722;GO:0019955;GO:0019957;GO:0022008;GO:…	K04189	-	T	KOG3656;09XJW;194AW;0V8HU;12PRP;1B2JP;1CTP0;0DIXH;0UIY4	chemokine (C-X-C motif) receptor 4 [Source:MGI Symbol;Acc:MGI:109563]	12767	P70658;A0A0R4J0N8
ENSMUSG00000033538	1849.84	195.349	3504.33	17.9388	4.16501	1.37156e-166	2.65619e-164	9	5308828	5336783	+	3710	Casp4	GO:0004197;GO:0006508;GO:0002376;GO:0004197;GO:0004197;GO:0004197;GO:0005515;GO:0005576;GO:0005737;GO:0005737;GO:0005739;GO:0005739;GO:0005783;GO:0005783;GO:0005789;GO:0005829;GO:0005829;GO:0005886;GO:0006508;GO:0006508;GO:0006508;GO:0006954;GO:0007015;GO:0008233;GO:0008233;GO:0008234;GO:0008234;GO:0012501;GO:0016020;GO:0016540;GO:0016540;GO:0016787;GO:0032731;GO:0032991;GO:0032991;GO:0035234;GO:…	K04394	-	D	1ARQT;0VAES;1CVVC;12S0S;0UFW8;0DM0G;18SGZ;09WHC;KOG3573	caspase 4, apoptosis-related cysteine peptidase [Source:MGI Symbol;Acc:MGI:107700]	12363	P70343
ENSMUSG00000045502	2958.08	11.912	5904.24	495.655	8.95319	1.72197e-165	3.29205e-163	5	124001633	124003562	-	1930	Hcar2	GO:0001614;GO:0001781;GO:0004930;GO:0004930;GO:0004930;GO:0005525;GO:0005886;GO:0005886;GO:0006915;GO:0007165;GO:0007186;GO:0007186;GO:0007186;GO:0016020;GO:0016020;GO:0016021;GO:0016021;GO:0016021;GO:0030054;GO:0033031;GO:0033031;GO:0035590;GO:0050995;GO:0050995;GO:0050995;GO:0070165;GO:0070165;GO:0070165;GO:0070553;GO:0070553;GO:0070553;	K08402	-	T	0IKI5;09TWR;1CPWS;13JB3;1B1UV;0V4VT;18S7G;0DF77;0UHAA	hydroxycarboxylic acid receptor 2 [Source:MGI Symbol;Acc:MGI:1933383]	80885	Q9EP66;Q0VBA6
ENSMUSG00000041782	470.919	0	941.839	Inf	Inf	3.06048e-165	5.77695e-163	1	135746336	135761080	+	3400	Lad1	GO:0005198;GO:0005576;GO:0005604;GO:0015629;GO:0015629;	-	-	S	0A27U;0VD3Q;0UNZN;0DPVZ;1CYVF;1AYHZ;0IIRJ;18WMH;13R1N	ladinin [Source:MGI Symbol;Acc:MGI:109343]	16763	P57016
ENSMUSG00000026012	1776	3380.91	171.091	0.0506051	-4.30457	2.79946e-162	5.21819e-160	1	60755959	60812518	+	6122	Cd28	GO:0001772;GO:0002020;GO:0002020;GO:0002863;GO:0005886;GO:0005886;GO:0006955;GO:0009897;GO:0009897;GO:0009897;GO:0009986;GO:0009986;GO:0010628;GO:0010628;GO:0010629;GO:0010629;GO:0014068;GO:0016020;GO:0016020;GO:0016021;GO:0019901;GO:0031295;GO:0031295;GO:0032733;GO:0032733;GO:0032733;GO:0032743;GO:0032743;GO:0032743;GO:0032753;GO:0032753;GO:0032753;GO:0042102;GO:0042102;GO:0042102;GO:0042102;GO:…	K06470	-	T	13R2A;09Z38;0DKIS;18TQB;0VA0R;0IXMM;1CVCU;1AZ54;0UP4N	CD28 antigen [Source:MGI Symbol;Acc:MGI:88327]	12487	P31041;Q8CDB3
ENSMUSG00000035107	2138.25	262.119	4014.39	15.3151	3.93689	3.38675e-161	6.23496e-159	16	58228806	58290090	+	8401	Dcbld2	GO:0005887;GO:0005887;GO:0005887;GO:0009986;GO:0009986;GO:0009986;GO:0016020;GO:0016021;GO:0030308;GO:0030308;GO:0030308;GO:0042060;GO:0042060;GO:0042060;	K24794	-	T;U	18SAI;0DF4E;0II5Z;0V4TF;1AS2X;09TU5;1CPUA;12YUE;0UG9U	discoidin, CUB and LCCL domain containing 2 [Source:MGI Symbol;Acc:MGI:1920629]	73379	Q91ZV3
ENSMUSG00000036067	4969.81	136.824	9802.8	71.6454	6.1628	3.1827e-160	5.78786e-158	2	26911375	26918010	-	3211	Slc2a6	GO:0005764;GO:0005765;GO:0005765;GO:0006110;GO:0006110;GO:0008643;GO:0016020;GO:0016020;GO:0016021;GO:0016021;GO:0022857;GO:0055085;GO:1904659;GO:0005764;GO:0005765;GO:0005765;GO:0005765;GO:0006110;GO:0006110;GO:0006110;GO:0008643;GO:0016020;GO:0016020;GO:0016021;GO:0016021;GO:0022857;GO:0055085;GO:1904659;GO:0016020;GO:0016021;	K08144	-	J;G	09VQM;1B3Y1;KOG0254;0DJ26;1CTTS;0V8N1;0UTH3;18XDT;12RBT	solute carrier family 2 (facilitated glucose transporter), member 6 [Source:MGI Symbol;Acc:MGI:2443286]	227659	Q3UDF0
ENSMUSG00000032691	17295.9	541.394	34050.5	62.894	5.97485	6.11879e-160	1.09932e-157	11	59432394	59457782	+	4057	Nlrp3	GO:0000139;GO:0000166;GO:0002367;GO:0002376;GO:0002674;GO:0002830;GO:0005515;GO:0005515;GO:0005524;GO:0005576;GO:0005634;GO:0005737;GO:0005737;GO:0005783;GO:0005829;GO:0005829;GO:0006919;GO:0006954;GO:0006954;GO:0006954;GO:0008134;GO:0032088;GO:0032088;GO:0032691;GO:0032731;GO:0032731;GO:0032731;GO:0032731;GO:0032736;GO:0032753;GO:0032754;GO:0042802;GO:0043280;GO:0043280;GO:0043280;GO:0043565;GO:…	K12800	-	S;T	1AXM4;09Y5T;0IE5X;0V93A;0DJJ2;0UNAE;1CUBN;1914T;13QUA	NLR family, pyrin domain containing 3 [Source:MGI Symbol;Acc:MGI:2653833]	216799	Q8R4B8
ENSMUSG00000024014	4320.87	683.042	7958.7	11.6518	3.54249	8.27127e-159	1.46835e-156	17	29709727	29715086	+	3362	Pim1	GO:0000166;GO:0004672;GO:0004674;GO:0004674;GO:0004674;GO:0004674;GO:0004674;GO:0005515;GO:0005524;GO:0005524;GO:0005524;GO:0005524;GO:0005634;GO:0005634;GO:0005634;GO:0005730;GO:0005730;GO:0005737;GO:0005737;GO:0005737;GO:0005737;GO:0005829;GO:0005829;GO:0005886;GO:0005886;GO:0006468;GO:0006468;GO:0006468;GO:0006468;GO:0006915;GO:0007049;GO:0008134;GO:0008134;GO:0016020;GO:0016301;GO:0016310;GO:…	K04702	EC:2.7.11.1	T;B	KOG0583;09THD;0UFXZ;1ATEZ;0DEU7;0V4GC;1958A;12UDI;1CPHY	proviral integration site 1 [Source:MGI Symbol;Acc:MGI:97584]	18712	P06803
ENSMUSG00000048537	1826.21	211.469	3440.95	16.2716	4.02429	4.43551e-158	7.78145e-156	9	44597601	44646495	-	7179	Phldb1	GO:0010470;GO:0010717;GO:0045180;GO:0070507;GO:1904261;GO:0003674;GO:0010470;GO:0010717;GO:0045180;GO:0045180;GO:0070507;GO:0070507;GO:1904261;	K23794	-	Z;T	1BBAH;0WIB8;0E914;1DFXA;13F2P;0ISGZ;197CM;0B5P1;0V3JA	pleckstrin homology like domain, family B, member 1 [Source:MGI Symbol;Acc:MGI:2143230]	102693	Q6PDH0
ENSMUSG00000031596	11281.9	2093.61	20470.1	9.77744	3.28946	6.4135e-157	1.11207e-154	8	41315433	41375345	+	9135	Slc7a2	GO:0000064;GO:0002537;GO:0005289;GO:0005292;GO:0005886;GO:0005886;GO:0005886;GO:0006809;GO:0006865;GO:0006865;GO:0006865;GO:0015171;GO:0015171;GO:0015179;GO:0015181;GO:0015181;GO:0015189;GO:0015807;GO:0015809;GO:0016020;GO:0016020;GO:0016021;GO:0016021;GO:0016021;GO:0022857;GO:0030054;GO:0042116;GO:0043030;GO:0050727;GO:0055085;GO:0061459;GO:0089718;GO:0097627;GO:0097638;GO:0097638;GO:0097639;GO:…	K13864	-	E	0V5II;1AV9P;09UJB;0UHNX;18YYY;1CQRW;12QK9;0DG2D;KOG1286	solute carrier family 7 (cationic amino acid transporter, y+ system), member 2 [Source:MGI Symbol;Acc:MGI:99828]	11988	P18581
ENSMUSG00000035891	3127.09	5803.82	450.354	0.0775962	-3.68787	4.4447e-155	7.61831e-153	15	86023329	86070342	-	4812	Cerk	GO:0000166;GO:0000287;GO:0000287;GO:0000287;GO:0001727;GO:0001729;GO:0001729;GO:0001729;GO:0001729;GO:0003951;GO:0005524;GO:0005737;GO:0005739;GO:0005886;GO:0005886;GO:0005886;GO:0006665;GO:0006672;GO:0006672;GO:0006672;GO:0006672;GO:0016020;GO:0016020;GO:0016021;GO:0016021;GO:0016021;GO:0016301;GO:0016301;GO:0016310;GO:0016310;GO:0016740;GO:0046834;GO:0102773;	K04715	EC:2.7.1.138	T;I	0UPC1;0DNDQ;1AX7R;12NTX;1CXBK;09UKX;191SQ;0V5KB;KOG1115	ceramide kinase [Source:MGI Symbol;Acc:MGI:2386052]	223753	Q8K4Q7
ENSMUSG00000021281	40869.6	8298.34	73440.9	8.85007	3.14569	4.72805e-152	8.0119e-150	12	111408903	111421452	+	4984	Tnfaip2	GO:0000145;GO:0000145;GO:0000149;GO:0001525;GO:0006887;GO:0006887;GO:0007275;GO:0030154;GO:0051601;GO:0000145;GO:0006887;GO:0000145;GO:0006887;GO:0000145;GO:0006887;GO:0000145;GO:0006887;	K19989	-	U	0VDJS;18TZB;KOG2286;1B41V;133HT;1CZDD;0A2PZ;0UTGX;0DQBF	tumor necrosis factor, alpha-induced protein 2 [Source:MGI Symbol;Acc:MGI:104960]	21928	Q61333
ENSMUSG00000025959	1882.71	241.431	3523.99	14.5963	3.86753	2.78833e-150	4.67186e-148	1	64068606	64161441	-	8131	Klf7	GO:0000122;GO:0000122;GO:0000122;GO:0000785;GO:0000978;GO:0000978;GO:0000978;GO:0000981;GO:0000981;GO:0000981;GO:0001228;GO:0001228;GO:0003677;GO:0003677;GO:0003700;GO:0005515;GO:0005634;GO:0005634;GO:0005634;GO:0005654;GO:0005829;GO:0006357;GO:0007409;GO:0007411;GO:0042593;GO:0042593;GO:0042593;GO:0045604;GO:0045604;GO:0045893;GO:0045944;GO:0045944;GO:0046872;GO:0048813;GO:0061179;GO:0061179;GO:…	K09207	-	K	1AYAM;1CUE6;0UKGH;13HQY;KOG1721;09Y7Z;0DJHW;18TS7;0V95K	Kruppel-like factor 7 (ubiquitous) [Source:MGI Symbol;Acc:MGI:1935151]	93691	Q99JB0
ENSMUSG00000022906	3216.6	518.21	5914.99	11.4143	3.51277	1.38599e-148	2.29644e-146	16	35758840	35792975	+	4872	Parp9	GO:0000122;GO:0000122;GO:0002230;GO:0002230;GO:0002376;GO:0003714;GO:0003714;GO:0003714;GO:0003950;GO:0003950;GO:0003950;GO:0003950;GO:0004857;GO:0004857;GO:0005634;GO:0005634;GO:0005634;GO:0005634;GO:0005654;GO:0005654;GO:0005737;GO:0005737;GO:0005737;GO:0005737;GO:0005739;GO:0005739;GO:0005829;GO:0005829;GO:0005829;GO:0006281;GO:0006302;GO:0006302;GO:0006302;GO:0006471;GO:0006471;GO:0006974;GO:…	K15260	EC:2.4.2.30	K;L;B	0VB7Q;KOG2633;1CWU7;0DMYD;0UR6C;0A0BJ;1B1IR;13JCG;18S0H	poly (ADP-ribose) polymerase family, member 9 [Source:MGI Symbol;Acc:MGI:1933117]	80285	Q8CAS9
ENSMUSG00000042622	919.761	69.2445	1770.28	25.5656	4.67613	1.246e-147	2.04179e-145	15	79230821	79243276	+	2594	Maff	GO:0000978;GO:0000981;GO:0001228;GO:0001701;GO:0003677;GO:0003677;GO:0003700;GO:0005634;GO:0005634;GO:0005654;GO:0005654;GO:0005739;GO:0006355;GO:0006357;GO:0035914;GO:0043565;GO:0045604;GO:0045604;GO:0045944;GO:1990837;GO:0000978;GO:0000981;GO:0001228;GO:0001228;GO:0001701;GO:0003677;GO:0003677;GO:0003700;GO:0005634;GO:0005634;GO:0005654;GO:0005654;GO:0005654;GO:0005739;GO:0005739;GO:0006355;GO:…	K09037	-	K	0VETP;13PV3;0DRIE;0UUE2;0A3YU;1AYB2;KOG4196;193BP;1CXHH	v-maf musculoaponeurotic fibrosarcoma oncogene family, protein F (avian) [Source:MGI Symbol;Acc:MGI:96910]	17133	O54791;Q3U0G5
ENSMUSG00000028599	40729.2	8592.34	72866	8.48034	3.08412	3.29812e-147	5.34582e-145	4	144940033	144973440	-	3818	Tnfrsf1b	GO:0002718;GO:0002724;GO:0002724;GO:0003176;GO:0003177;GO:0003332;GO:0005031;GO:0005031;GO:0005031;GO:0005031;GO:0005515;GO:0005634;GO:0005634;GO:0006954;GO:0006954;GO:0006955;GO:0006955;GO:0007166;GO:0007568;GO:0008630;GO:0008630;GO:0010614;GO:0016020;GO:0016020;GO:0016020;GO:0016020;GO:0016021;GO:0030424;GO:0030424;GO:0031625;GO:0031625;GO:0031641;GO:0031643;GO:0031643;GO:0032496;GO:0033209;GO:…	K05141	-	T	13MDA;1CXWX;0A1BV;18YYD;0IJ06;0DNZC;0VC7E;0UNTC;1B010	tumor necrosis factor receptor superfamily, member 1b [Source:MGI Symbol;Acc:MGI:1314883]	21938	P25119;Q545P4
ENSMUSG00000021087	915.669	54.3991	1776.94	32.6648	5.02967	1.42645e-145	2.28722e-143	12	72258526	72455828	-	4980	Rtn1	GO:0000139;GO:0000139;GO:0000139;GO:0005783;GO:0005783;GO:0005783;GO:0005789;GO:0005789;GO:0005790;GO:0005794;GO:0008150;GO:0016020;GO:0016021;GO:1902430;GO:1902430;GO:0005783;GO:0005789;GO:0016020;GO:0016021;GO:0005783;GO:0005789;GO:0016020;GO:0016021;	K20721	-	U	13BRI;1B0CF;1CQSZ;192C8;0DG3E;0URYM;0VBVP;0A2IP;KOG1792	reticulon 1 [Source:MGI Symbol;Acc:MGI:1933947]	104001	Q8K0T0;Q4FJL2;Q05CD8
ENSMUSG00000044827	3446.86	590.793	6302.94	10.6686	3.4153	8.90355e-144	1.41244e-141	5	65082022	65090906	-	3346	Tlr1	GO:0001774;GO:0001774;GO:0001775;GO:0001775;GO:0002224;GO:0002224;GO:0002224;GO:0002224;GO:0002376;GO:0002755;GO:0004888;GO:0004888;GO:0005794;GO:0005794;GO:0005794;GO:0005886;GO:0005887;GO:0006952;GO:0006954;GO:0006954;GO:0006954;GO:0006955;GO:0007165;GO:0007250;GO:0016020;GO:0016021;GO:0016021;GO:0016787;GO:0030670;GO:0031410;GO:0032493;GO:0032493;GO:0032755;GO:0032757;GO:0032757;GO:0032760;GO:…	K05398	-	T	0UGQQ;1CT9T;09X7S;1AWJB;13HS3;0DIJ8;0V86D;18VI4;KOG4641	toll-like receptor 1 [Source:MGI Symbol;Acc:MGI:1341295]	21897	Q9EPQ1;B9EJ46
ENSMUSG00000031609	1928.98	269.093	3588.87	13.3369	3.73735	1.052e-143	1.65131e-141	8	57935741	57940894	-	1178	Sap30	GO:0000118;GO:0000118;GO:0000118;GO:0000122;GO:0003677;GO:0003712;GO:0003714;GO:0003714;GO:0005515;GO:0005515;GO:0005515;GO:0005634;GO:0005634;GO:0005654;GO:0005654;GO:0005654;GO:0006355;GO:0006355;GO:0006355;GO:0016580;GO:0035914;GO:0046872;	K19202	-	K	18YTE;0A1S9;0DPEF;0VCMY;1AVEV;0IHMG;12S0R;0UJNZ;1CX32	sin3 associated polypeptide [Source:MGI Symbol;Acc:MGI:1929129]	60406	O88574
ENSMUSG00000063234	1146.19	7.6592	2284.73	298.299	8.22061	1.08775e-143	1.68963e-141	15	103216662	103219039	-	1725	Gpr84	GO:0004930;GO:0004930;GO:0007186;GO:0007186;GO:0016020;GO:0016021;GO:0016021;	K08421	-	T	KOG3656;0DKBV;12RH3;18TUI;0V9UA;0UH8Z;1ASX2;09YWK;1CV5N	G protein-coupled receptor 84 [Source:MGI Symbol;Acc:MGI:1934129]	80910	Q8CIM5;A0A0R4J100
ENSMUSG00000039841	1959.2	279.963	3638.45	12.9962	3.70001	2.22031e-142	3.41332e-140	6	28239926	28398004	-	4831	Zfp800	GO:0003677;GO:0005634;GO:0008150;GO:0046872;GO:0003677;GO:0005634;GO:0008150;GO:0046872;GO:0003677;GO:0005634;GO:0008150;GO:0046872;GO:0005634;	-	-	K	1ARF6;0VB73;12SQ4;1CWTN;0DMXS;0A0B0;KOG1721;0UFJA;18S5X	zinc finger protein 800 [Source:MGI Symbol;Acc:MGI:1889334]	627049	Q0VEE6;B7ZMR9
ENSMUSG00000010307	1189.17	2270.12	108.224	0.0476733	-4.39068	3.3084e-140	5.03417e-138	7	46700349	46704525	+	1887	Tmem86a	GO:0016020;GO:0016021;GO:0016021;GO:0047408;GO:0047409;	-	-	S;J	0A03G;KOG4804;191EZ;1CXMT;13HYY;0DNQF;0VBYT;0UU8W;1B01N	transmembrane protein 86A [Source:MGI Symbol;Acc:MGI:1915143]	67893	Q9D8N3
ENSMUSG00000020227	3135.8	348.879	5922.72	16.9765	4.08546	1.70621e-138	2.57001e-136	10	119977553	120038035	-	3676	Irak3	GO:0000166;GO:0000287;GO:0000287;GO:0000287;GO:0001960;GO:0002755;GO:0004672;GO:0004672;GO:0004674;GO:0004674;GO:0004674;GO:0005515;GO:0005524;GO:0005524;GO:0005524;GO:0005524;GO:0005634;GO:0005634;GO:0005634;GO:0005634;GO:0005737;GO:0005737;GO:0005737;GO:0005737;GO:0005886;GO:0006468;GO:0006468;GO:0006468;GO:0006468;GO:0006915;GO:0007165;GO:0009615;GO:0010933;GO:0010936;GO:0016301;GO:0016310;GO:…	K04732	EC:2.7.11.1	T	0UK7C;0VD7I;KOG1187;0DPZK;13IMP;0A2BI;1CYZR;18Y1X;1AVPU	interleukin-1 receptor-associated kinase 3 [Source:MGI Symbol;Acc:MGI:1921164]	73914	Q8K4B2;Q0VB14
ENSMUSG00000026131	6298.71	1269.19	11328.2	8.92558	3.15795	7.07841e-138	1.05553e-135	1	33947306	34347742	+	41619	Dst	GO:0003779;GO:0005509;GO:0005737;GO:0005856;GO:0005856;GO:0005874;GO:0008017;GO:0016020;GO:0042995;GO:0045104;GO:0046872;GO:0003779;GO:0005737;GO:0005856;GO:0005856;GO:0005874;GO:0008092;GO:0045104;GO:0003779;GO:0003779;GO:0003779;GO:0005198;GO:0005509;GO:0005515;GO:0005515;GO:0005515;GO:0005634;GO:0005635;GO:0005737;GO:0005737;GO:0005783;GO:0005789;GO:0005856;GO:0005856;GO:0005874;GO:0005882;GO:…	K10382	-	Z	12PJV;09UFA;0DH7H;0UKX7;1B4JZ;1CRXN;0V5EN;18VX5;KOG0516;KOG0517	dystonin [Source:MGI Symbol;Acc:MGI:104627]	13518	Q91ZU6
ENSMUSG00000056498	966.571	1861.59	71.554	0.0384371	-4.70136	2.63435e-137	3.88945e-135	3	84573499	84611882	+	4738	Tmem154	GO:0003674;GO:0005575;GO:0008150;GO:0016020;GO:0016021;	-	-	S	1D3P0;13Y8N;0A82B;0UVU8;0DUF4;0J2D6;0VIBN;193JD;1B6AD	transmembrane protein 154 [Source:MGI Symbol;Acc:MGI:2444725]	320782	Q8C4Q9
ENSMUSG00000038437	4270.99	826.47	7715.51	9.3355	3.22273	1.88295e-135	2.75281e-133	11	97554240	97576289	+	7451	Mllt6	GO:0003014;GO:0005634;GO:0007588;GO:0010765;GO:0031491;GO:0031491;GO:0035811;GO:0035812;GO:0036359;GO:0042393;GO:0042393;GO:0045944;GO:0045944;GO:0046872;GO:2001161;GO:0003014;GO:0005634;GO:0007588;GO:0010765;GO:0031491;GO:0031491;GO:0031491;GO:0035811;GO:0035812;GO:0036359;GO:0042393;GO:0042393;GO:0042393;GO:0045944;GO:0045944;GO:0046872;GO:2001161;	K23588	-	S	1CTEY;0UPXX;12PIA;1AVAJ;0V8AM;KOG0956;0DIPX;09XCE;18Z4X	myeloid/lymphoid or mixed-lineage leukemia; translocated to, 6 [Source:MGI Symbol;Acc:MGI:1935145]	246198	B1AR09;Q3UPK1
ENSMUSG00000035513	789.588	59.8308	1519.35	25.394	4.66642	2.29555e-135	3.32342e-133	2	29084553	29143017	-	3990	Ntng2	GO:0003674;GO:0005515;GO:0005886;GO:0005886;GO:0005886;GO:0007275;GO:0007399;GO:0007409;GO:0009887;GO:0009888;GO:0010975;GO:0016020;GO:0016477;GO:0030154;GO:0030424;GO:0031225;GO:0034446;GO:0043256;GO:0045171;GO:0045171;GO:0046658;GO:0050804;GO:0070831;GO:0090543;GO:0090543;GO:0098685;GO:0098698;GO:0098978;GO:0099029;GO:0099560;GO:0150011;GO:1905606;GO:2001222;GO:0003674;GO:0005515;GO:0005886;GO:…	K16359	-	T;W	18U2B;1CRVW;1AUQ7;0UH30;KOG3512;0V6VW;13IK3;09VXD;0DH5M	netrin G2 [Source:MGI Symbol;Acc:MGI:2159341]	171171	Q8R4F1;A2AKW8
ENSMUSG00000029490	1540.55	212.874	2868.23	13.4738	3.75209	8.10784e-135	1.16254e-132	5	108588920	108596966	-	5340	Mfsd7a	GO:0005575;GO:0016020;GO:0016021;GO:0022857;GO:0055085;GO:0016020;GO:0016021;	K12306	-	B;U	0UU62;0DR51;0VED7;KOG2563;1B1Y8;1D0A9;13K1N;0A2H3;191R2	major facilitator superfamily domain containing 7A [Source:MGI Symbol;Acc:MGI:2442629]	243197	Q8CE47
ENSMUSG00000020057	4760.51	952.053	8568.96	9.00051	3.17001	3.37628e-134	4.79496e-132	10	88158666	88214942	-	3045	Dram1	GO:0016020;GO:0016021;GO:0003674;GO:0005737;GO:0005737;GO:0005764;GO:0005764;GO:0005764;GO:0005764;GO:0005765;GO:0006914;GO:0006915;GO:0010506;GO:0010506;GO:0010506;GO:0016020;GO:0016021;	K21955	-	S;T	KOG4320;0A1B4;13IZ4;18ZSY;0DNYR;0VC6S;0UG0B;1CXW9;1B37H	DNA-damage regulated autophagy modulator 1 [Source:MGI Symbol;Acc:MGI:1918962]	71712	Q9DC58
ENSMUSG00000039908	1134.39	2159.79	108.993	0.0504646	-4.30858	6.00679e-134	8.45031e-132	11	119246383	119271905	+	3610	Slc26a11	GO:0005654;GO:0005654;GO:0005764;GO:0005765;GO:0005765;GO:0005765;GO:0005783;GO:0005783;GO:0005783;GO:0005794;GO:0005794;GO:0005794;GO:0005886;GO:0005886;GO:0005886;GO:0005887;GO:0006811;GO:0008271;GO:0008272;GO:0008272;GO:0008272;GO:0008272;GO:0008509;GO:0008509;GO:0008509;GO:0015116;GO:0015116;GO:0015301;GO:0015301;GO:0016020;GO:0016020;GO:0016021;GO:0016021;GO:0016021;GO:0016021;GO:0043231;GO:…	K14708	-	P	0V4TX;0DF51;18WM9;1AZHC;09TUP;1CPUU;0UGAW;12N5G;KOG0236	solute carrier family 26, member 11 [Source:MGI Symbol;Acc:MGI:2444589]	268512	Q80ZD3
ENSMUSG00000052837	7029.14	1485.08	12573.2	8.46634	3.08174	7.03892e-134	9.80976e-132	8	85701113	85705347	-	2301	Junb	GO:0000785;GO:0000977;GO:0000978;GO:0000978;GO:0000981;GO:0001228;GO:0001570;GO:0001649;GO:0001701;GO:0001829;GO:0003677;GO:0003677;GO:0003677;GO:0003690;GO:0003700;GO:0003700;GO:0005515;GO:0005515;GO:0005515;GO:0005515;GO:0005634;GO:0005634;GO:0005654;GO:0005654;GO:0005667;GO:0006355;GO:0006355;GO:0006357;GO:0006357;GO:0006366;GO:0008134;GO:0009987;GO:0030316;GO:0033687;GO:0035976;GO:0035976;GO:…	K09028	-	K	09T5A;0UH63;0V440;12UA8;1B1P9;KOG0837;19555;1CP64;0DEGF	jun B proto-oncogene [Source:MGI Symbol;Acc:MGI:96647]	16477	P09450;Q569U6
ENSMUSG00000041936	2613.88	381.246	4846.51	12.7123	3.66815	1.36137e-133	1.8797e-131	4	156249747	156281945	-	9285	Agrn	GO:0005509;GO:0007275;GO:0016020;GO:0016021;GO:0030154;GO:0007275;GO:0016020;GO:0016021;GO:0030154;GO:0001932;GO:0001934;GO:0001934;GO:0002162;GO:0002162;GO:0005201;GO:0005509;GO:0005509;GO:0005509;GO:0005515;GO:0005576;GO:0005604;GO:0005615;GO:0005615;GO:0005796;GO:0005829;GO:0005886;GO:0005886;GO:0007009;GO:0007268;GO:0007275;GO:0007416;GO:0007528;GO:0007528;GO:0009887;GO:0009888;GO:0009986;GO:…	K06254	-	W	0V3XI;0B6HC;0E9K8;197H9;1DGF6;0WJ7Y;13G7P;1BBJW;0ITSI	agrin [Source:MGI Symbol;Acc:MGI:87961]	11603	-
ENSMUSG00000020275	3803.06	735.111	6871.01	9.3469	3.22449	4.1277e-133	5.64699e-131	11	23686847	23720970	-	7466	Rel	GO:0000978;GO:0001228;GO:0003677;GO:0003700;GO:0003700;GO:0005634;GO:0005634;GO:0005634;GO:0005667;GO:0005737;GO:0005737;GO:0006355;GO:0007249;GO:0007249;GO:0010629;GO:0032688;GO:0043123;GO:0043565;GO:0045893;GO:0045944;GO:1901215;	K09254	-	K	0IG8F;1CPFA;1AT7E;09TEG;13E12;0UM6S;191F7;0DERH;0V4DN	reticuloendotheliosis oncogene [Source:MGI Symbol;Acc:MGI:97897]	19696	A4QPD3
ENSMUSG00000025795	1392.91	2620.75	165.079	0.0629891	-3.98875	6.47471e-133	8.77735e-131	10	121246255	121312252	-	3826	Rassf3	GO:0005737;GO:0005737;GO:0005829;GO:0005856;GO:0005874;GO:0005886;GO:0007165;GO:0007165;GO:0042802;GO:0042981;	K09852	-	Z;T	1CQH1;KOG4239;0UH9A;12NS7;1ASX7;18VP1;09UHY;0V5H4;0DFTM	Ras association (RalGDS/AF-6) domain family member 3 [Source:MGI Symbol;Acc:MGI:2179722]	192678	Q99P51
ENSMUSG00000044350	4698.12	946.457	8449.78	8.9278	3.15831	7.59327e-133	1.0201e-130	14	77261640	77274344	-	3644	Lacc1	GO:0002221;GO:0002221;GO:0002376;GO:0004000;GO:0004000;GO:0004731;GO:0004731;GO:0005507;GO:0005634;GO:0005737;GO:0005777;GO:0005777;GO:0005783;GO:0005783;GO:0006954;GO:0016740;GO:0016787;GO:0017061;GO:0017061;GO:0030641;GO:0030641;GO:0045087;GO:0046872;GO:0047975;GO:0047975;GO:0050727;GO:0055114;GO:0070431;GO:1900542;	K05810	EC:1.10.3.-	S	1AYAA;0VCWZ;18Y6S;0A3B9;0IHUK;1CX85;13IUI;0DNB5;0UPRY	laccase domain containing 1 [Source:MGI Symbol;Acc:MGI:2445077]	210808	Q8BZT9
ENSMUSG00000016283	1372.78	29.1495	2716.4	93.1887	6.54208	9.3939e-133	1.25073e-130	17	37791742	37794443	-	1551	H2-M2	GO:0002476;GO:0005615;GO:0009897;GO:0009986;GO:0016020;GO:0016021;GO:0002476;GO:0005615;GO:0009897;GO:0009986;GO:0016020;GO:0016021;	K06751	-	-	-	histocompatibility 2, M region locus 2 [Source:MGI Symbol;Acc:MGI:95914]	14990	Q6W9L1
ENSMUSG00000030966	1732.93	260.591	3205.27	12.3	3.62059	2.60917e-132	3.44318e-130	7	102207128	102214693	-	3714	Trim21	GO:0000209;GO:0003713;GO:0004842;GO:0005634;GO:0005654;GO:0005737;GO:0006513;GO:0008270;GO:0010508;GO:0016567;GO:0019005;GO:0031648;GO:0032088;GO:0032092;GO:0032897;GO:0034341;GO:0042802;GO:0045087;GO:0045787;GO:0045824;GO:0045893;GO:0046598;GO:0046872;GO:0046872;GO:0051091;GO:0051865;GO:0061630;GO:0070534;GO:0090086;GO:1902187;GO:0008270;GO:0045893;GO:0046598;GO:0046872;GO:0046872;	K10651	EC:2.3.2.27	O;K	KOG2177;12QXR;0USXG;09UKA;0DFVY;18XES;1CQJA;0V5JK;1B05T	tripartite motif-containing 21 [Source:MGI Symbol;Acc:MGI:106657]	20821	Q3U7K7;Q3UCL2
ENSMUSG00000004296	3226.45	2.30289	6450.59	2801.08	11.4518	3.89644e-132	5.09681e-130	11	44290890	44304860	+	1967	Il12b	GO:0001916;GO:0002230;GO:0002230;GO:0002323;GO:0002827;GO:0002827;GO:0002860;GO:0002862;GO:0004896;GO:0004896;GO:0004896;GO:0005125;GO:0005125;GO:0005126;GO:0005515;GO:0005576;GO:0005576;GO:0005615;GO:0005615;GO:0005737;GO:0005788;GO:0005796;GO:0007050;GO:0007166;GO:0008083;GO:0008283;GO:0009897;GO:0009986;GO:0010033;GO:0010224;GO:0010536;GO:0016020;GO:0016477;GO:0019221;GO:0019221;GO:0019233;GO:…	K05425	-	T	18U6Z;1CZQE;12TC0;09XR2;0DRCT;0VF5R;0IF5K;1AW8A;0UKRV	interleukin 12b [Source:MGI Symbol;Acc:MGI:96540]	16160	P43432;Q3ZAX5
ENSMUSG00000050350	434.591	8.81064	860.372	97.6514	6.60957	8.48727e-132	1.10054e-129	14	122148665	122153193	-	1498	Gpr18	GO:0002300;GO:0002305;GO:0002689;GO:0004930;GO:0004930;GO:0004930;GO:0005886;GO:0005887;GO:0007165;GO:0007186;GO:0007186;GO:0016020;GO:0016021;GO:0016021;GO:0030659;GO:0031410;GO:0032720;GO:0035025;GO:0051482;	K08410	-	T	13MSS;1CZ0W;0DQ0F;0VD8P;18Y3Q;0A2CY;0IFPC;0UFJN;1AX6F	G protein-coupled receptor 18 [Source:MGI Symbol;Acc:MGI:107859]	110168	Q8K1Z6
ENSMUSG00000028385	1141.06	2167.13	114.988	0.0530599	-4.23623	2.10308e-131	2.70354e-129	4	59805840	59904737	+	7795	Snx30	GO:0005737;GO:0015031;GO:0035091;	K17921	-	U	194IH;1CPFF;12PDA;0DERN;0UFS9;09TEK;KOG2273;1B0PZ;0V4DS	sorting nexin family member 30 [Source:MGI Symbol;Acc:MGI:2443882]	209131	Q8CE50
ENSMUSG00000002983	1611.88	238.47	2985.29	12.5185	3.64599	1.72382e-130	2.19706e-128	7	19340142	19363363	-	3885	Relb	GO:0000785;GO:0000785;GO:0000785;GO:0000978;GO:0000978;GO:0000978;GO:0000978;GO:0000981;GO:0003677;GO:0003677;GO:0003677;GO:0003700;GO:0005515;GO:0005515;GO:0005515;GO:0005634;GO:0005634;GO:0005634;GO:0005634;GO:0005634;GO:0005654;GO:0005654;GO:0005737;GO:0005737;GO:0005813;GO:0005813;GO:0005815;GO:0005829;GO:0005829;GO:0005856;GO:0006355;GO:0006357;GO:0006357;GO:0006954;GO:0007249;GO:0010628;GO:…	K09253	-	K	0DJYW;1AWYK;0A0WR;0IFBK;13IH3;0UNAN;18TJS;1CYNR;0VD2C	avian reticuloendotheliosis viral (v-rel) oncogene related B [Source:MGI Symbol;Acc:MGI:103289]	19698	Q04863
ENSMUSG00000025278	2488.79	441.279	4536.3	10.2799	3.36175	4.38049e-130	5.53576e-128	14	14518185	14651816	-	9198	Flnb	GO:0001725;GO:0003334;GO:0003382;GO:0003779;GO:0003779;GO:0005515;GO:0005634;GO:0005634;GO:0005737;GO:0005737;GO:0005829;GO:0005856;GO:0005886;GO:0005903;GO:0005925;GO:0005938;GO:0007519;GO:0030018;GO:0030036;GO:0030036;GO:0030154;GO:0042802;GO:0043005;GO:0043005;GO:0043025;GO:0043025;GO:0045335;GO:0071346;	K04437	-	Z	0V4XN;0UM1B;KOG0518;1AWHC;18XE3;0DIHA;09TYR;1CT7V;12NFR	filamin, beta [Source:MGI Symbol;Acc:MGI:2446089]	286940	Q80X90
ENSMUSG00000035004	9914.69	2240.41	17589	7.85078	2.97284	6.29016e-130	7.88226e-128	7	120663290	120673795	-	2175	Igsf6	GO:0003674;GO:0005575;GO:0008150;GO:0016020;GO:0016021;	-	-	T	0IUPA;09ZQP;18YGQ;1AYTZ;1CW3M;0DM8I;0UQDG;0VAM6;13K1D	immunoglobulin superfamily, member 6 [Source:MGI Symbol;Acc:MGI:1891393]	80719	P0C6B7
ENSMUSG00000033857	615.452	1210.05	20.8512	0.0172317	-5.85879	2.36732e-129	2.94179e-127	11	118367655	118380035	+	5184	Engase	GO:0004553;GO:0005737;GO:0005737;GO:0005829;GO:0006517;GO:0006517;GO:0008152;GO:0016787;GO:0016798;GO:0033925;GO:0033925;GO:0004553;GO:0005737;GO:0005737;GO:0005829;GO:0006517;GO:0006517;GO:0008152;GO:0016787;GO:0016798;GO:0033925;GO:0033925;GO:0033925;GO:0004553;GO:0005737;GO:0005737;GO:0005829;GO:0006517;GO:0006517;GO:0008152;GO:0016787;GO:0016798;GO:0033925;GO:0033925;GO:0033925;	K01227	EC:3.2.1.96	P;G	KOG2331;0DK4G;1AWT3;18YHA;12SG4;0V9MR;09YPZ;0UN1R;1CUY8	endo-beta-N-acetylglucosaminidase [Source:MGI Symbol;Acc:MGI:2443788]	217364	Q8BX80
ENSMUSG00000079197	2817.67	528.255	5107.08	9.66784	3.27319	2.64892e-128	3.26452e-126	14	55824898	55828570	-	1764	Psme2	GO:0000502;GO:0005515;GO:0005654;GO:0005737;GO:0008537;GO:0010950;GO:0019884;GO:0042802;GO:0061133;GO:0061136;GO:2000045;GO:0000502;GO:0008537;GO:0000502;GO:0008537;	K06697	-	O	0A1VR;0US2U;1B22K;18U73;1CYGD;KOG4470;12U3Q;0DPHV;0VCRB	proteasome (prosome, macropain) activator subunit 2 (PA28 beta) [Source:MGI Symbol;Acc:MGI:1096365]	19188	P97372;Q5SVP3
ENSMUSG00000013846	8534.98	1931.17	15138.8	7.83918	2.9707	4.47966e-128	5.47547e-126	15	66974724	67048679	-	6851	St3gal1	GO:0002319;GO:0003836;GO:0003836;GO:0003836;GO:0005576;GO:0005794;GO:0006054;GO:0006468;GO:0006486;GO:0006486;GO:0006486;GO:0006487;GO:0008373;GO:0010706;GO:0010706;GO:0010706;GO:0016020;GO:0016021;GO:0016740;GO:0016757;GO:0032580;GO:0032588;GO:0032588;GO:0032588;GO:0097503;GO:1905403;GO:1990675;GO:1990675;GO:1990675;GO:1990676;GO:1990676;GO:1990676;GO:1990743;GO:1990743;GO:1990743;GO:0002319;GO:…	K00780	EC:2.4.99.4	G	0V77R;18T6Q;0DKMB;1CVFS;13IB8;0UPM5;KOG2692;0A20A;1AYNE	ST3 beta-galactoside alpha-2,3-sialyltransferase 1 [Source:MGI Symbol;Acc:MGI:98304]	20442	P54751;Q544T4
ENSMUSG00000021929	6008.69	1315.58	10701.8	8.13467	3.02408	8.8339e-128	1.07098e-125	14	61602660	61677323	-	4298	Kpna3	GO:0005634;GO:0005634;GO:0005654;GO:0005737;GO:0005737;GO:0006606;GO:0006607;GO:0008022;GO:0008139;GO:0015031;GO:0061608;GO:0061608;	K23583	-	U	0UQAN;0V809;09X23;18UNC;1CT39;KOG0166;0DICS;12RBS;1B01B	karyopherin (importin) alpha 3 [Source:MGI Symbol;Acc:MGI:1100863]	16648	O35344;Q543M7
ENSMUSG00000015340	40393	9867.82	70918.2	7.18682	2.84535	1.8974e-127	2.28177e-125	X	9301491	9354010	-	5808	Cybb	GO:0005244;GO:0005515;GO:0005515;GO:0005635;GO:0005635;GO:0005737;GO:0005737;GO:0005739;GO:0005783;GO:0005783;GO:0005791;GO:0005791;GO:0005794;GO:0005794;GO:0005886;GO:0005886;GO:0005886;GO:0005886;GO:0005887;GO:0006801;GO:0006801;GO:0006811;GO:0006952;GO:0006954;GO:0007584;GO:0009055;GO:0016020;GO:0016020;GO:0016021;GO:0016175;GO:0016175;GO:0016491;GO:0016491;GO:0020037;GO:0022900;GO:0030425;GO:…	K21421	EC:1.-.-.-	Q;C;P	1CSAS;0V6AP;1AVA4;KOG0039;12P7E;09VBE;0DHKF;18WB9;0UJTA	cytochrome b-245, beta polypeptide [Source:MGI Symbol;Acc:MGI:88574]	13058	Q61093;Q3U6G0
ENSMUSG00000025492	2431.9	447.458	4416.34	9.86983	3.30303	2.65142e-125	3.16303e-123	7	140589499	140590683	-	678	Ifitm3	GO:0002376;GO:0005634;GO:0005737;GO:0005737;GO:0005764;GO:0005765;GO:0005768;GO:0005783;GO:0005886;GO:0005886;GO:0005886;GO:0006898;GO:0008285;GO:0009615;GO:0009615;GO:0009986;GO:0016020;GO:0016021;GO:0016021;GO:0031410;GO:0031902;GO:0032897;GO:0032991;GO:0034341;GO:0034341;GO:0035455;GO:0035455;GO:0035456;GO:0035456;GO:0045071;GO:0045071;GO:0045087;GO:0045177;GO:0046597;GO:0046597;GO:0046597;GO:…	K06566	-	S;T	193XZ;13XNX;0VJSA;1D4IR;0A8GR;0UVYW;0DV1U;0J2DU;1B6FV	interferon induced transmembrane protein 3 [Source:MGI Symbol;Acc:MGI:1913391]	66141	Q9CQW9
ENSMUSG00000021733	3563.8	496.151	6631.46	13.3658	3.74047	4.46299e-125	5.28192e-123	14	7669823	7767484	-	15201	Slc4a7	GO:0005452;GO:0006811;GO:0006820;GO:0008509;GO:0015698;GO:0016020;GO:0016020;GO:0016021;GO:0016021;GO:0098656;GO:0005452;GO:0006811;GO:0006820;GO:0008509;GO:0015698;GO:0016020;GO:0016020;GO:0016021;GO:0016021;GO:0098656;GO:0005452;GO:0006811;GO:0006820;GO:0008509;GO:0015698;GO:0016020;GO:0016020;GO:0016021;GO:0016021;GO:0098656;GO:0005452;GO:0006811;GO:0006820;GO:0008509;GO:0015698;GO:0016020;GO:…	K13858	-	P	KOG1172;09VZ2;0DHY5;0V6NE;0UR5Y;12Q16;1CSNR;1B0XR	solute carrier family 4, sodium bicarbonate cotransporter, member 7 [Source:MGI Symbol;Acc:MGI:2443878]	218756	F8VQC9
ENSMUSG00000024953	8074.77	1869.45	14280.1	7.63868	2.93332	1.19557e-124	1.40381e-122	19	6884065	6887474	-	2139	Prdx5	GO:0004601;GO:0005782;GO:0016209;GO:0016491;GO:0016491;GO:0055114;GO:0098869;GO:0001016;GO:0004601;GO:0004601;GO:0005102;GO:0005102;GO:0005515;GO:0005634;GO:0005737;GO:0005737;GO:0005737;GO:0005739;GO:0005739;GO:0005739;GO:0005777;GO:0005777;GO:0005777;GO:0005782;GO:0005782;GO:0005829;GO:0006915;GO:0006979;GO:0006979;GO:0008379;GO:0008379;GO:0016209;GO:0016209;GO:0016480;GO:0016491;GO:0016491;GO:…	K11187	EC:1.11.1.24	O;K	0A4PF;13RBC;0VFII;0UGV2;KOG0541;18W7F;1AZKY;1D1EU;0DS1M	peroxiredoxin 5 [Source:MGI Symbol;Acc:MGI:1859821]	54683	P99029
ENSMUSG00000066152	3717.03	773.89	6660.17	8.60609	3.10536	1.80126e-124	2.09847e-122	4	62180799	62216648	+	2033	Slc31a2	GO:0005375;GO:0005375;GO:0006811;GO:0006825;GO:0006878;GO:0016020;GO:0016021;GO:0016021;GO:0035434;GO:0005375;GO:0005375;GO:0005515;GO:0005770;GO:0005886;GO:0006811;GO:0006825;GO:0006878;GO:0006878;GO:0006878;GO:0016020;GO:0016020;GO:0016021;GO:0016021;GO:0035434;GO:0035434;GO:0055037;GO:1902311;GO:0005375;GO:0005375;GO:0006811;GO:0006825;GO:0006878;GO:0016020;GO:0016021;GO:0016021;GO:0035434;	K14687	-	P	13S8I;1B1KG;0DUCW;KOG3386;0UVJE;0A7KI;0VIEY;1D3QK;1934E	solute carrier family 31, member 2 [Source:MGI Symbol;Acc:MGI:1333844]	20530	Q9CPU9;Q4KL43
ENSMUSG00000026821	3441.02	706.099	6175.93	8.74656	3.12872	3.94466e-124	4.55991e-122	2	28403137	28443093	+	6345	Ralgds	GO:0005085;GO:0005085;GO:0007264;GO:0050790;GO:0005085;GO:0005085;GO:0005515;GO:0005515;GO:0005634;GO:0005634;GO:0005737;GO:0005829;GO:0005903;GO:0007165;GO:0007264;GO:0030695;GO:0050790;GO:0005085;GO:0005085;GO:0007165;GO:0007264;GO:0050790;GO:0005085;GO:0005085;GO:0007165;GO:0007264;GO:0050790;GO:0005085;GO:0005085;GO:0007165;GO:0007264;GO:0050790;GO:0005085;GO:0005085;GO:0007264;GO:0050790;GO:…	K08732	-	T	1ATHD;1CTFJ;09XD2;0DIQG;0V8B2;KOG3629;0UQIW;12RJ9;18WBG	ral guanine nucleotide dissociation stimulator [Source:MGI Symbol;Acc:MGI:107485]	19730	Q03385;Q6ZPU1
ENSMUSG00000027698	5999.68	10812	1187.31	0.109814	-3.18687	1.72554e-123	1.97933e-121	3	27237114	27338757	+	5253	Nceh1	GO:0005783;GO:0005886;GO:0006470;GO:0006629;GO:0006805;GO:0016020;GO:0016020;GO:0016021;GO:0016021;GO:0016042;GO:0016787;GO:0016787;GO:0016787;GO:0017171;GO:0042301;GO:0043231;GO:0046485;GO:0052689;GO:0060395;GO:0016787;	K14349	EC:3.1.1.-	V	0UMWT;1B0GN;1CRN1;KOG1515;0V6N9;0DGXT;13KTG;1912D;09VPD	neutral cholesterol ester hydrolase 1 [Source:MGI Symbol;Acc:MGI:2443191]	320024	Q8BLF1
ENSMUSG00000048911	870.268	91.5916	1648.95	18.0032	4.17018	4.20642e-123	4.78826e-121	2	131139984	131194812	-	6801	Rnf24	GO:0000139;GO:0005794;GO:0005794;GO:0005794;GO:0005794;GO:0008270;GO:0012505;GO:0016020;GO:0016021;GO:0016567;GO:0046872;GO:0061630;GO:0000139;GO:0005794;GO:0005794;GO:0005794;GO:0008270;GO:0012505;GO:0016020;GO:0016021;GO:0016567;GO:0046872;GO:0061630;GO:0000139;GO:0005794;GO:0005794;GO:0005794;GO:0008270;GO:0012505;GO:0016020;GO:0016021;GO:0016567;GO:0046872;GO:0061630;	-	-	O	18YCC;KOG0800;0DRYA;0URMU;1D172;0A4F2;0VF9Z;1B1JK;13QDC	ring finger protein 24 [Source:MGI Symbol;Acc:MGI:1261771]	51902	Q8BGI1;Q4VA59
ENSMUSG00000079419	2866.65	571.362	5161.93	9.03442	3.17543	3.76707e-122	4.25564e-120	19	11446730	11459556	+	2050	Ms4a6c	GO:0016020;GO:0016021;GO:0016021;	K22191	-	S	0UUPF;1D2N7;0DS71;0VGZN;193JN;1B37A;0A64Y;13W8M;0J2FM	membrane-spanning 4-domains, subfamily A, member 6C [Source:MGI Symbol;Acc:MGI:2385644]	73656	Q99N08
ENSMUSG00000049502	3087.15	575.303	5598.99	9.73224	3.28277	1.30429e-121	1.46238e-119	16	35746881	35759521	-	5725	Dtx3l	GO:0002230;GO:0002230;GO:0002376;GO:0004842;GO:0004842;GO:0004842;GO:0004857;GO:0004857;GO:0005634;GO:0005634;GO:0005634;GO:0005654;GO:0005654;GO:0005654;GO:0005737;GO:0005737;GO:0005737;GO:0005764;GO:0005764;GO:0005764;GO:0005765;GO:0005768;GO:0005769;GO:0005769;GO:0005829;GO:0005829;GO:0006281;GO:0006302;GO:0006302;GO:0006302;GO:0006325;GO:0006511;GO:0006511;GO:0006974;GO:0006974;GO:0006974;GO:…	K06058	EC:2.3.2.27	O;L	0UK74;1AX70;0IEH5;0A43V;1D0VZ;0VEYR;13NAY;0DN4G;191RG	deltex 3-like, E3 ubiquitin ligase [Source:MGI Symbol;Acc:MGI:2656973]	209200	Q3UIR3
ENSMUSG00000045672	360.35	5.34257	715.358	133.898	7.06499	1.0869e-120	1.20954e-118	4	63132241	63253228	+	13022	Col27a1	GO:0003431;GO:0005201;GO:0005201;GO:0005201;GO:0005576;GO:0005581;GO:0005583;GO:0005615;GO:0030020;GO:0030198;GO:0030198;GO:0031012;GO:0046872;GO:0062023;	K19721	-	W	0V43J;1B282;0DJVB;09T4V;0UNQ0;191C9;KOG3544;1CUNK;12N1R	collagen, type XXVII, alpha 1 [Source:MGI Symbol;Acc:MGI:2672118]	373864	Q5QNQ9
ENSMUSG00000030560	10404.8	2047.94	18761.7	9.16125	3.19554	3.4415e-120	3.80145e-118	7	87927293	87960096	+	5808	Ctsc	GO:0001913;GO:0004197;GO:0004252;GO:0005615;GO:0005654;GO:0005654;GO:0005737;GO:0005764;GO:0005764;GO:0005764;GO:0005764;GO:0005783;GO:0005783;GO:0005794;GO:0005794;GO:0005813;GO:0005813;GO:0006508;GO:0006508;GO:0006508;GO:0006508;GO:0006508;GO:0006915;GO:0007568;GO:0008233;GO:0008234;GO:0008234;GO:0008234;GO:0008234;GO:0010033;GO:0010033;GO:0016505;GO:0016787;GO:0019902;GO:0019902;GO:0031404;GO:…	K01275	EC:3.4.14.1	O	0DGZK;0UIZ9;12PF9;18SFA;KOG1543;1AVFG;1CRPV;09VR1;0V6Q1	cathepsin C [Source:MGI Symbol;Acc:MGI:109553]	13032	P97821;Q3UBY5;Q8BQL3
ENSMUSG00000020806	4786.55	1089.14	8483.96	7.78959	2.96155	2.76547e-119	3.03226e-117	11	116488991	116517845	-	5293	Rhbdf2	GO:0005515;GO:0005515;GO:0005783;GO:0005789;GO:0005789;GO:0005886;GO:0006508;GO:0015031;GO:0016020;GO:0016021;GO:0016021;GO:0042058;GO:0050708;GO:0050709;GO:0005515;GO:0005515;GO:0005783;GO:0005789;GO:0005789;GO:0005886;GO:0005886;GO:0006508;GO:0015031;GO:0016020;GO:0016021;GO:0016021;GO:0042058;GO:0050708;GO:0050709;	-	-	T;U	09XQS;12QPF;1AVM6;18YX6;0DJ2S;0V8NH;0UMRY;1CTUG;KOG2290	rhomboid 5 homolog 2 [Source:MGI Symbol;Acc:MGI:2442473]	217344	Q80WQ6
ENSMUSG00000000555	12174	3060.9	21287	6.9545	2.79795	1.27093e-118	1.38336e-116	15	103252713	103275190	-	4933	Itga5	GO:0005154;GO:0005154;GO:0005178;GO:0005178;GO:0005515;GO:0005515;GO:0005515;GO:0005737;GO:0005737;GO:0005783;GO:0005794;GO:0005886;GO:0005886;GO:0005886;GO:0005911;GO:0005911;GO:0005925;GO:0005925;GO:0005925;GO:0007044;GO:0007155;GO:0007155;GO:0007155;GO:0007155;GO:0007155;GO:0007157;GO:0007159;GO:0007229;GO:0007229;GO:0007229;GO:0007229;GO:0007565;GO:0007613;GO:0008305;GO:0008305;GO:0008305;GO:…	K06484	-	W	1CP6D;09T5M;0V44B;0UFEM;190SD;KOG3637;12N24;1B1M0;0DEGR	integrin alpha 5 (fibronectin receptor alpha) [Source:MGI Symbol;Acc:MGI:96604]	16402	P11688;Q80YP5
ENSMUSG00000052270	5735.68	31.4969	11439.9	363.205	8.50464	5.98094e-118	6.46289e-116	17	18108086	18114214	+	1296	Fpr2	GO:0001540;GO:0001540;GO:0001774;GO:0001934;GO:0002430;GO:0002768;GO:0004875;GO:0004930;GO:0004930;GO:0004930;GO:0004982;GO:0004982;GO:0004982;GO:0005124;GO:0005737;GO:0005886;GO:0005886;GO:0005886;GO:0006898;GO:0006935;GO:0006954;GO:0007165;GO:0007166;GO:0007186;GO:0007186;GO:0007186;GO:0007193;GO:0007200;GO:0007200;GO:0007204;GO:0014068;GO:0016020;GO:0016021;GO:0016021;GO:0019722;GO:0032930;GO:…	K04173	-	T	09YRX;194JK;1CTRF;0DNT1;0II0H;1AX0S;13FV7;0UP03;0V7XT	formyl peptide receptor 2 [Source:MGI Symbol;Acc:MGI:1278319]	14289	O88536
ENSMUSG00000025314	15794.3	4045.85	27542.8	6.80767	2.76716	1.05723e-117	1.1342e-115	2	90260098	90410991	-	8352	Ptprj	GO:0004721;GO:0004725;GO:0004725;GO:0006470;GO:0016020;GO:0016021;GO:0016311;GO:0016787;GO:0016791;GO:0035335;GO:0004721;GO:0004725;GO:0004725;GO:0006470;GO:0016020;GO:0016021;GO:0016311;GO:0016787;GO:0016791;GO:0035335;GO:0004721;GO:0004725;GO:0004725;GO:0006470;GO:0016020;GO:0016021;GO:0016311;GO:0016787;GO:0016791;GO:0035335;	K05698	EC:3.1.3.48	T	0UPWR;1B0CY;12NH8;KOG0791;09U1T;0V50R;0DNZ0;1CXWE;18T42	protein tyrosine phosphatase, receptor type, J [Source:MGI Symbol;Acc:MGI:104574]	19271	Q64455;E9Q4S7
ENSMUSG00000022876	541.597	33.5702	1049.62	31.2666	4.96655	1.23399e-117	1.31438e-115	16	75655681	75819169	-	4935	Samsn1	GO:0001726;GO:0001784;GO:0001784;GO:0002820;GO:0005634;GO:0005634;GO:0005634;GO:0005737;GO:0005737;GO:0005737;GO:0005829;GO:0042995;GO:0050732;GO:0050732;GO:0050869;GO:0050869;	K23707	-	T	1CTEN;0UM98;1AVJG;12QFT;0V4V9;KOG4384;0DIPN;09XC7;18WJV	SAM domain, SH3 domain and nuclear localization signals, 1 [Source:MGI Symbol;Acc:MGI:1914992]	67742	P57725
ENSMUSG00000062232	2811.39	405.183	5217.6	12.8771	3.68674	5.44859e-117	5.76237e-115	3	78969823	79193824	-	14051	Rapgef2	GO:0001568;GO:0001764;GO:0005085;GO:0005085;GO:0005085;GO:0005096;GO:0005096;GO:0005096;GO:0005737;GO:0005737;GO:0005768;GO:0005770;GO:0005770;GO:0005829;GO:0005886;GO:0005886;GO:0005911;GO:0005923;GO:0007165;GO:0007186;GO:0007186;GO:0007218;GO:0007218;GO:0007264;GO:0007275;GO:0007399;GO:0008285;GO:0008285;GO:0010976;GO:0010976;GO:0016020;GO:0016020;GO:0016324;GO:0019901;GO:0019933;GO:0019933;GO:…	K08018	-	T	18VZI;1CTRA;0UM0J;0DIZW;1AX4T;0V5Q6;12NW8;09UQI;KOG3542	Rap guanine nucleotide exchange factor (GEF) 2 [Source:MGI Symbol;Acc:MGI:2659071]	76089	E9QNQ4;Q6NXI4
ENSMUSG00000041642	2353.79	4248.76	458.83	0.107991	-3.21101	5.40628e-116	5.67736e-114	1	136059127	136105736	+	12184	Kif21b	GO:0000166;GO:0003774;GO:0003777;GO:0005524;GO:0005524;GO:0007018;GO:0008017;GO:0000166;GO:0003774;GO:0003777;GO:0005524;GO:0005524;GO:0007018;GO:0008017;GO:0003777;GO:0007018;	K24185	-	Z	0V7JF;1CSPT;12QPN;09WKT;1AZMD;0UJZ1;195J2;0DHZ3;KOG0244	kinesin family member 21B [Source:MGI Symbol;Acc:MGI:109234]	16565	Q9QXL1;F8VQE2
ENSMUSG00000026235	353.812	6.21646	701.408	112.831	6.81802	6.91982e-116	7.21597e-114	1	77343822	77491725	-	8054	Epha4	GO:0000166;GO:0004672;GO:0004672;GO:0004672;GO:0004672;GO:0004713;GO:0004713;GO:0004714;GO:0004714;GO:0005003;GO:0005004;GO:0005005;GO:0005005;GO:0005515;GO:0005515;GO:0005524;GO:0005524;GO:0005737;GO:0005737;GO:0005737;GO:0005741;GO:0005741;GO:0005768;GO:0005769;GO:0005783;GO:0005783;GO:0005794;GO:0005794;GO:0005886;GO:0005886;GO:0005886;GO:0005886;GO:0005887;GO:0005887;GO:0005887;GO:0005887;GO:…	K05105	EC:2.7.10.1	T	0DEEW;0UNNC;09T3T;18W05;1CP4M;KOG0196;0V42J;12PWI;1B4AC	Eph receptor A4 [Source:MGI Symbol;Acc:MGI:98277]	13838	Q03137
ENSMUSG00000089809	13153.5	3433.84	22873.2	6.66111	2.73576	2.11941e-114	2.19476e-112	5	99365285	99876924	-	13805	Rasgef1b	GO:0005085;GO:0005085;GO:0005085;GO:0005768;GO:0005769;GO:0005770;GO:0007264;GO:0030496;GO:0050790;GO:0005085;GO:0005085;GO:0005085;GO:0005768;GO:0005769;GO:0005770;GO:0007264;GO:0030496;GO:0050790;GO:0005085;GO:0005085;GO:0007264;GO:0050790;GO:0005085;GO:0005085;GO:0007264;GO:0050790;GO:0005085;GO:0005085;GO:0005085;GO:0005768;GO:0005769;GO:0005770;GO:0007264;GO:0030496;GO:0050790;	-	-	T	0UJ9K;1B04T;09UFQ;0DFRD;18SC2;KOG3541;13KPK;0V5F3;KOG3417;1CQEY	RasGEF domain family, member 1B [Source:MGI Symbol;Acc:MGI:2443755]	320292	Q8JZL7
ENSMUSG00000038459	3217.24	717.5	5716.97	7.9679	2.9942	1.04904e-113	1.07884e-111	7	83758564	83801101	-	4606	Abhd17c	GO:0002084;GO:0002084;GO:0002084;GO:0002084;GO:0005768;GO:0005886;GO:0005886;GO:0008474;GO:0008474;GO:0008474;GO:0008474;GO:0010008;GO:0014069;GO:0016020;GO:0016787;GO:0018215;GO:0030054;GO:0042995;GO:0043197;GO:0045202;GO:0045211;GO:0055038;GO:0098839;GO:0098978;GO:0098978;GO:0099175;GO:0099175;GO:0099175;GO:1902817;GO:1905668;	K01076	EC:3.1.2.22	S;O	0UHQ6;1CUAW;0V5HI;12NSC;195Y2;KOG1552;1B3FF;09UI8;0DFTZ	abhydrolase domain containing 17C [Source:MGI Symbol;Acc:MGI:1917428]	70178	Q8VCV1
ENSMUSG00000025746	3961.28	1.47358	7921.09	5375.41	12.3922	1.11466e-113	1.13848e-111	5	30218112	30224979	+	2428	Il6	GO:0001781;GO:0001878;GO:0002262;GO:0002314;GO:0002377;GO:0002384;GO:0002526;GO:0002639;GO:0002675;GO:0005102;GO:0005102;GO:0005125;GO:0005125;GO:0005125;GO:0005125;GO:0005125;GO:0005138;GO:0005138;GO:0005138;GO:0005515;GO:0005576;GO:0005576;GO:0005615;GO:0005615;GO:0005615;GO:0005615;GO:0005737;GO:0005737;GO:0005896;GO:0005896;GO:0006469;GO:0006469;GO:0006953;GO:0006954;GO:0006955;GO:0007165;GO:…	K05405	-	W	0IW11;0VD3S;1D2QU;0UP2D;1B6G6;13QWV;0DQZU;193F5;0A68U	interleukin 6 [Source:MGI Symbol;Acc:MGI:96559]	16193	P08505;A2RTD1
ENSMUSG00000042677	3202.73	718.829	5686.64	7.91097	2.98386	1.55992e-113	1.58241e-111	4	125012216	125021633	-	2882	Zc3h12a	GO:0000294;GO:0000294;GO:0000932;GO:0000932;GO:0000932;GO:0001525;GO:0001933;GO:0002230;GO:0002230;GO:0002376;GO:0002757;GO:0002757;GO:0002757;GO:0003677;GO:0003677;GO:0003677;GO:0003682;GO:0003682;GO:0003682;GO:0003723;GO:0003723;GO:0003723;GO:0003729;GO:0003729;GO:0003729;GO:0003730;GO:0004518;GO:0004519;GO:0004521;GO:0004521;GO:0004532;GO:0004540;GO:0004540;GO:0004843;GO:0004843;GO:0004843;GO:…	K18668	EC:3.1.-.-	S;K	0UP7I;0DKIW;12RNG;KOG3777;1AYSW;09VCG;18WD5;0V6BM;1CVD0	zinc finger CCCH type containing 12A [Source:MGI Symbol;Acc:MGI:2385891]	230738	Q5D1E7
ENSMUSG00000018459	1268.66	203.769	2333.56	11.452	3.51753	2.45546e-113	2.47404e-111	2	165246948	165315150	-	5215	Slc13a3	GO:0005310;GO:0005310;GO:0005343;GO:0005886;GO:0005886;GO:0005886;GO:0006811;GO:0006814;GO:0006835;GO:0006835;GO:0015137;GO:0015137;GO:0015139;GO:0015139;GO:0015141;GO:0015141;GO:0015141;GO:0015141;GO:0015183;GO:0015293;GO:0015362;GO:0015742;GO:0015744;GO:0015746;GO:0015746;GO:0015810;GO:0016020;GO:0016020;GO:0016020;GO:0016021;GO:0016021;GO:0016021;GO:0016323;GO:0016323;GO:0017153;GO:0017153;GO:…	K14445	-	P	0V512;195A0;12Q3H;0DFBW;0USYH;1CU0A;09U24;1AYJI;KOG1281	solute carrier family 13 (sodium-dependent dicarboxylate transporter), member 3 [Source:MGI Symbol;Acc:MGI:2149635]	114644	Q91Y63;Q3UUJ6
ENSMUSG00000003863	491.735	29.4716	953.998	32.3701	5.01659	1.0645e-111	1.06535e-109	7	44988546	45016443	-	7899	Ppfia3	GO:0001669;GO:0001669;GO:0003674;GO:0005737;GO:0005737;GO:0007269;GO:0007269;GO:0007269;GO:0016079;GO:0016081;GO:0031410;GO:0045202;GO:0048172;GO:0048172;GO:0048786;GO:0048786;GO:0050808;GO:0098831;GO:0098875;GO:0098875;GO:0098978;GO:0001669;GO:0001669;GO:0001669;GO:0003674;GO:0005737;GO:0005737;GO:0007269;GO:0007269;GO:0007269;GO:0016079;GO:0016081;GO:0031410;GO:0045202;GO:0048172;GO:0048172;GO:…	-	-	T	0DF0T;0V4PV;1AUMZ;0US7P;18VPC;09TQM;KOG0249;1CPQK;12NBM	protein tyrosine phosphatase, receptor type, f polypeptide (PTPRF), interacting protein (liprin), alpha 3 [Source:MGI Symbol;Acc:MGI:1924037]	76787	P60469;Q9CWF5
ENSMUSG00000021895	2143.83	442.146	3845.51	8.69738	3.12058	1.64625e-111	1.63659e-109	14	26836856	27125868	+	4527	Arhgef3	GO:0005085;GO:0035556;GO:0050790;GO:0005085;GO:0005085;GO:0005085;GO:0005737;GO:0035025;GO:0035556;GO:0050790;GO:0005085;GO:0005085;GO:0005085;GO:0005737;GO:0035025;GO:0035556;GO:0050790;	K20683	-	T	1CTBB;12R8C;0UM5G;18SR8;KOG4305;1AWWS;09WAQ;0DHK3;0V78Y	Rho guanine nucleotide exchange factor (GEF) 3 [Source:MGI Symbol;Acc:MGI:1918954]	71704	Q91X46;A0A2X0SFN9
ENSMUSG00000035697	3217.41	5705.58	729.232	0.12781	-2.96792	1.7255e-110	1.70401e-108	10	79852487	79867306	+	4478	Arhgap45	GO:0005096;GO:0007165;GO:0035556;GO:0043547;GO:0005096;GO:0007165;GO:0035556;GO:0043547;GO:0005096;GO:0005096;GO:0005737;GO:0005886;GO:0007165;GO:0016020;GO:0032587;GO:0035556;GO:0042995;GO:0046872;GO:0090630;	K20644	-	T	18TVQ;0DFUM;1ASYC;12NSS;0V5I7;KOG1453;0UHAR;1CQI1;09UIZ	Rho GTPase activating protein 45 [Source:MGI Symbol;Acc:MGI:1917969]	70719	Q3TBD2;G3X9Q3
ENSMUSG00000039232	922.836	123.842	1721.83	13.9034	3.79737	1.87262e-110	1.83714e-108	10	12813953	12840042	-	4209	Stx11	GO:0005484;GO:0005794;GO:0006886;GO:0016020;GO:0016192;GO:0061025;GO:0005484;GO:0005794;GO:0006886;GO:0016020;GO:0016192;GO:0061025;GO:0005794;GO:0016020;GO:0016192;	K08487	-	U	0V6HU;0UT3A;13HDA;1B4JJ;194V1;1CRHC;0DGTA;09VIK;KOG0810	syntaxin 11 [Source:MGI Symbol;Acc:MGI:1921982]	74732	Q9D3G5;Q3U5V8
ENSMUSG00000021457	29585.1	8226.23	50943.9	6.19286	2.63061	2.52274e-110	2.45877e-108	13	52737209	52802828	+	9362	Syk	GO:0000166;GO:0000187;GO:0001525;GO:0001784;GO:0001784;GO:0001819;GO:0001820;GO:0001945;GO:0002092;GO:0002250;GO:0002250;GO:0002281;GO:0002281;GO:0002283;GO:0002283;GO:0002366;GO:0002376;GO:0002554;GO:0004672;GO:0004672;GO:0004672;GO:0004674;GO:0004674;GO:0004713;GO:0004713;GO:0004713;GO:0004715;GO:0004715;GO:0004715;GO:0004715;GO:0004715;GO:0005102;GO:0005178;GO:0005178;GO:0005515;GO:0005515;GO:…	K05855	EC:2.7.10.2	T	0IH0T;18VQR;13I3G;0UJB4;0VDHS;1AX5P;0DH8V;0A2MV;1CRYW	spleen tyrosine kinase [Source:MGI Symbol;Acc:MGI:99515]	20963	P48025;Q3UPF7;Q6P1E0
ENSMUSG00000020826	2093.5	2.6867	4184.32	1557.42	10.6049	8.00537e-110	7.75169e-108	11	78811613	78851080	+	4439	Nos2	GO:0001666;GO:0003779;GO:0003958;GO:0004517;GO:0004517;GO:0004517;GO:0004517;GO:0004517;GO:0004517;GO:0005515;GO:0005515;GO:0005515;GO:0005515;GO:0005516;GO:0005516;GO:0005615;GO:0005634;GO:0005634;GO:0005737;GO:0005737;GO:0005737;GO:0005777;GO:0005777;GO:0005829;GO:0005829;GO:0005829;GO:0005829;GO:0005886;GO:0006527;GO:0006527;GO:0006527;GO:0006527;GO:0006801;GO:0006809;GO:0006809;GO:0006809;GO:…	K13241	EC:1.14.13.39	C	1AWYU;09TG9;1CPGY;0V4FA;0UK24;12PXV;KOG1158;18XWD;0DET5	nitric oxide synthase 2, inducible [Source:MGI Symbol;Acc:MGI:97361]	18126	P29477
ENSMUSG00000030717	616.139	55.3793	1176.9	21.2516	4.4095	1.37828e-109	1.32599e-107	7	126222421	126230033	-	2514	Nupr1	GO:0002526;GO:0003677;GO:0003677;GO:0003677;GO:0003682;GO:0003713;GO:0003713;GO:0003713;GO:0005515;GO:0005634;GO:0005634;GO:0005634;GO:0005634;GO:0005654;GO:0005654;GO:0005737;GO:0005737;GO:0005737;GO:0006473;GO:0008285;GO:0008584;GO:0009636;GO:0010506;GO:0010507;GO:0010507;GO:0010507;GO:0010667;GO:0010667;GO:0010667;GO:0010698;GO:0031401;GO:0032993;GO:0032993;GO:0035914;GO:0042771;GO:0043065;GO:…	K15626	-	K	193XQ;KOG4319;1B6SM;0DVHV;1D4UG;0VK7B;13XEV;0UW9J;0A9AJ	nuclear protein transcription regulator 1 [Source:MGI Symbol;Acc:MGI:1891834]	56312	Q9WTK0
ENSMUSG00000015837	60403	13214.2	107592	8.14213	3.02541	1.48853e-109	1.42288e-107	11	50090193	50101654	-	3356	Sqstm1	GO:0000122;GO:0000407;GO:0000423;GO:0000423;GO:0000932;GO:0000932;GO:0001934;GO:0002376;GO:0003712;GO:0005080;GO:0005080;GO:0005080;GO:0005515;GO:0005515;GO:0005515;GO:0005634;GO:0005737;GO:0005737;GO:0005739;GO:0005764;GO:0005768;GO:0005770;GO:0005776;GO:0005776;GO:0005783;GO:0005829;GO:0005829;GO:0006914;GO:0006914;GO:0006915;GO:0007032;GO:0007032;GO:0007032;GO:0008270;GO:0016234;GO:0016235;GO:…	K14381	-	S;J;L;B	18SAQ;0DEQ5;0V4C0;0UFQF;09TCX;12TTI;1ARJP;1CPDW;KOG4582	sequestosome 1 [Source:MGI Symbol;Acc:MGI:107931]	18412	Q64337
ENSMUSG00000046223	3342.45	786.391	5898.51	7.50072	2.90703	2.84962e-109	2.7066e-107	7	24161909	24175393	+	2617	Plaur	GO:0001934;GO:0001934;GO:0005102;GO:0005102;GO:0005515;GO:0005576;GO:0005886;GO:0005886;GO:0005886;GO:0005886;GO:0005887;GO:0009986;GO:0009986;GO:0016020;GO:0016021;GO:0019899;GO:0019899;GO:0019904;GO:0019904;GO:0030162;GO:0030377;GO:0031225;GO:0034112;GO:0034112;GO:0038195;GO:0043066;GO:0043066;GO:0043388;GO:0043388;GO:0045742;GO:0045742;GO:0048762;GO:0060742;GO:0090200;GO:0090200;GO:2001243;GO:…	K03985	-	T	18SAP;0VDEG;0UTFT;1B369;13PEG;1CZ7C;0DFNR;0A2IM;0IJ50	plasminogen activator, urokinase receptor [Source:MGI Symbol;Acc:MGI:97612]	18793	P35456;Q545X5
ENSMUSG00000001542	3560.1	848.717	6271.48	7.38936	2.88545	5.4691e-109	5.16173e-107	13	75854876	75920483	+	9828	Ell2	GO:0005634;GO:0005654;GO:0005654;GO:0006368;GO:0006368;GO:0008023;GO:0008023;GO:0008023;GO:0008023;GO:0032968;GO:0042795;GO:0042795;GO:0042795;GO:0006368;GO:0008023;GO:0006368;GO:0008023;GO:0006368;GO:0008023;GO:0006368;GO:0008023;GO:0006368;GO:0008023;	K15183	-	K	0UN8I;0DJM0;KOG4796;1B2VD;1CUDU;0V93M;13FCK;09Y7I;1900S	elongation factor for RNA polymerase II 2 [Source:MGI Symbol;Acc:MGI:2183438]	192657	Q3UKU1
ENSMUSG00000026822	507.027	34.5366	979.516	28.3617	4.82587	6.18604e-109	5.80165e-107	2	32274645	32278264	-	2623	Lcn2	GO:0002020;GO:0002376;GO:0005506;GO:0005506;GO:0005515;GO:0005549;GO:0005576;GO:0005576;GO:0005615;GO:0005615;GO:0005615;GO:0005615;GO:0005829;GO:0005829;GO:0006811;GO:0006915;GO:0009615;GO:0009617;GO:0009635;GO:0010628;GO:0015891;GO:0031346;GO:0031410;GO:0036094;GO:0042493;GO:0042742;GO:0042742;GO:0042802;GO:0045087;GO:0055072;GO:0060205;GO:0070301;GO:0097192;GO:0097577;GO:0097577;GO:0120162;GO:…	K21129	-	O;W	0VES9;0UTQK;1B5PN;0JAXJ;0DP2N;1CZK8;13TAW;193BY;0A3XE	lipocalin 2 [Source:MGI Symbol;Acc:MGI:96757]	16819	P11672
ENSMUSG00000027351	3555.17	847.635	6262.7	7.38845	2.88527	1.98916e-108	1.85389e-106	2	116951855	117012760	+	6784	Spred1	GO:0000188;GO:0000188;GO:0005173;GO:0005515;GO:0005515;GO:0005634;GO:0005654;GO:0005654;GO:0005737;GO:0005737;GO:0005737;GO:0005829;GO:0005829;GO:0005886;GO:0005886;GO:0005886;GO:0005901;GO:0006469;GO:0006469;GO:0007275;GO:0009966;GO:0010719;GO:0010801;GO:0010801;GO:0010801;GO:0010801;GO:0010923;GO:0010923;GO:0010923;GO:0016020;GO:0016020;GO:0016525;GO:0016525;GO:0016525;GO:0016525;GO:0019901;GO:…	K04703	-	T	0IQ20;0WGW7;0B4DF;1DF7N;1BAZD;13CZ3;0V345;1976T;0E88V	sprouty protein with EVH-1 domain 1, related sequence [Source:MGI Symbol;Acc:MGI:2150016]	114715	Q924S8
ENSMUSG00000027611	3383.11	272.982	6493.25	23.7863	4.57206	7.61235e-108	7.05064e-106	2	155593037	155597391	+	2031	Procr	GO:0005615;GO:0005615;GO:0005615;GO:0005813;GO:0007596;GO:0007599;GO:0008022;GO:0016020;GO:0016021;GO:0038023;GO:0048471;GO:0048471;GO:0050819;GO:0050819;GO:0050819;GO:0038023;	K06557	-	W;T	13Q2F;1B2KY;0DRFT;0VEQK;18Y8Y;0IWW5;0UMZV;0A3VY;1D0N4	protein C receptor, endothelial [Source:MGI Symbol;Acc:MGI:104596]	19124	Q64695
ENSMUSG00000037242	23127.7	6531.82	39723.6	6.08156	2.60444	1.41471e-107	1.30223e-105	4	134941280	135000125	-	6572	Clic4	GO:0001525;GO:0001525;GO:0001886;GO:0005244;GO:0005254;GO:0005254;GO:0005254;GO:0005515;GO:0005634;GO:0005634;GO:0005737;GO:0005737;GO:0005737;GO:0005739;GO:0005739;GO:0005739;GO:0005739;GO:0005813;GO:0005813;GO:0005829;GO:0005829;GO:0005886;GO:0005886;GO:0005886;GO:0005902;GO:0005902;GO:0005911;GO:0005911;GO:0006811;GO:0006821;GO:0006821;GO:0007035;GO:0009566;GO:0009986;GO:0009986;GO:0015630;GO:…	K05024	-	P	KOG1422;13HTJ;0DKFR;0V9Y1;1B595;1CRYR;0UIAQ;18ZDF;09Z0K	chloride intracellular channel 4 (mitochondrial) [Source:MGI Symbol;Acc:MGI:1352754]	29876	Q9QYB1;Q543N5
ENSMUSG00000042608	1591.99	305.58	2878.4	9.41948	3.23565	1.62258e-107	1.48441e-105	4	125997750	126034822	+	4117	Stk40	GO:0000166;GO:0003016;GO:0004672;GO:0004674;GO:0005515;GO:0005524;GO:0005524;GO:0005634;GO:0005654;GO:0005654;GO:0005737;GO:0005829;GO:0005829;GO:0005977;GO:0006468;GO:0010468;GO:0016301;GO:0016310;GO:0016740;GO:0030324;GO:0035264;GO:0043066;GO:0043408;GO:0048286;GO:0060425;GO:0106310;GO:0106311;GO:0000166;GO:0003016;GO:0004672;GO:0004674;GO:0005515;GO:0005515;GO:0005524;GO:0005524;GO:0005634;GO:…	K16312	EC:2.7.11.1	T	KOG0583;0VAAZ;09ZDZ;1350N;1CVRI;0DKWC;0USNH;190P5;1ATXD	serine/threonine kinase 40 [Source:MGI Symbol;Acc:MGI:1921428]	74178	Q7TNL3
ENSMUSG00000054855	296.482	3.23846	589.726	182.101	7.50859	8.07195e-107	7.33956e-105	15	98561302	98575342	-	2967	Rnd1	GO:0000166;GO:0003924;GO:0003924;GO:0005102;GO:0005525;GO:0005525;GO:0005525;GO:0005737;GO:0005829;GO:0005856;GO:0005856;GO:0005886;GO:0005886;GO:0005886;GO:0005912;GO:0005938;GO:0007015;GO:0007015;GO:0007162;GO:0007163;GO:0007264;GO:0008360;GO:0015629;GO:0016020;GO:0016322;GO:0016477;GO:0019901;GO:0030865;GO:0031410;GO:0032956;GO:0042995;GO:0043231;GO:0043231;GO:0000166;GO:0003924;GO:0003924;GO:…	K07531	-	S;Z	18XV1;09ZA0;0DKS8;0VA74;KOG0393;1CVKW;13KD7;1AYY6;0UU21	Rho family GTPase 1 [Source:MGI Symbol;Acc:MGI:2444878]	223881	Q8BLR7
ENSMUSG00000000957	12599.3	925.09	24273.5	26.2391	4.71365	3.28785e-106	2.97142e-104	14	54669069	54682821	+	5960	Mmp14	GO:0001501;GO:0001503;GO:0001503;GO:0001525;GO:0001541;GO:0001666;GO:0001935;GO:0001958;GO:0004175;GO:0004175;GO:0004222;GO:0004222;GO:0004222;GO:0004222;GO:0005178;GO:0005178;GO:0005615;GO:0005615;GO:0005634;GO:0005634;GO:0005737;GO:0005737;GO:0005737;GO:0005737;GO:0005829;GO:0005829;GO:0005886;GO:0005886;GO:0006508;GO:0006508;GO:0006508;GO:0006508;GO:0006979;GO:0008233;GO:0008237;GO:0008237;GO:…	K07763	EC:3.4.24.80	O;W	KOG1565;0UJH4;09TSQ;0DEJD;0V4S1;18S8U;12PPA;1AZDX;1CS33	matrix metallopeptidase 14 (membrane-inserted) [Source:MGI Symbol;Acc:MGI:101900]	17387	P53690
ENSMUSG00000018654	4403.54	1114.71	7692.38	6.90082	2.78677	4.60994e-106	4.14117e-104	11	11635003	11722926	+	5777	Ikzf1	GO:0003677;GO:0005634;GO:0005654;GO:0005721;GO:0005829;GO:0019904;GO:0030098;GO:0030218;GO:0032991;GO:0000122;GO:0000977;GO:0001227;	K09220	-	K;B	1AT7F;0UHKV;0V6EU;0DG0S;18W0R;KOG1721;09VFN;1CQQC;12SSB	IKAROS family zinc finger 1 [Source:MGI Symbol;Acc:MGI:1342540]	22778	G5E8H3;Q3UQ33;Q8C5P6
ENSMUSG00000028459	4406.79	1110.14	7703.43	6.93912	2.79475	4.782e-106	4.27001e-104	4	43446462	43454628	-	3422	Cd72	GO:0004888;GO:0005887;GO:0004888;GO:0005887;GO:0005887;GO:0005887;GO:0016020;GO:0016021;GO:0030246;GO:0004888;GO:0005887;GO:0016020;GO:0016021;GO:0004888;GO:0005887;GO:0005887;GO:0016020;GO:0016021;GO:0004888;GO:0005887;GO:0016020;GO:0016021;	K06504	-	T;V	13EM9;0V3FS;1DFRG;0B5DI;0WI0R;197BF;0E8UT;1BB83;0IS25	CD72 antigen [Source:MGI Symbol;Acc:MGI:88345]	12517	P21855
ENSMUSG00000022372	1211.28	208.035	2214.53	10.645	3.4121	4.86761e-106	4.32059e-104	15	66652668	66703678	-	9186	Sla	GO:0004715;GO:0005102;GO:0005515;GO:0005737;GO:0005768;GO:0005925;GO:0007169;GO:0009966;GO:0030154;GO:0031234;GO:0038083;GO:0042127;GO:0043197;GO:0045087;GO:0004715;GO:0005102;GO:0005515;GO:0005737;GO:0005768;GO:0005925;GO:0007169;GO:0009966;GO:0030154;GO:0031234;GO:0038083;GO:0042127;GO:0043197;GO:0045087;GO:0004715;GO:0005102;GO:0005515;GO:0005737;GO:0005768;GO:0005925;GO:0007169;GO:0009966;GO:…	K23698	-	T	0V9ZD;0DP1N;1CXZG;19152;0UQUU;09Y8K;13KD6;0IFZ7;1AZ66	src-like adaptor [Source:MGI Symbol;Acc:MGI:104295]	20491	Q60898;Q4FJX0
ENSMUSG00000020573	4047.9	1021.12	7074.68	6.92834	2.79251	3.71087e-105	3.27435e-103	12	32223472	32258658	-	8426	Pik3cg	GO:0000166;GO:0001525;GO:0001932;GO:0002376;GO:0002675;GO:0003376;GO:0003376;GO:0004674;GO:0005515;GO:0005524;GO:0005737;GO:0005737;GO:0005737;GO:0005829;GO:0005829;GO:0005886;GO:0005886;GO:0005886;GO:0005942;GO:0005942;GO:0005943;GO:0005944;GO:0005944;GO:0006468;GO:0006897;GO:0006935;GO:0006954;GO:0007186;GO:0007204;GO:0010595;GO:0010595;GO:0010897;GO:0014065;GO:0014065;GO:0014065;GO:0016020;GO:…	K21289	EC:2.7.1.153	T	18V6R;KOG0904;0DMAW;0UFCH;1CW62;1B0E0;09WZX;12QH0;0V7XY	phosphatidylinositol-4,5-bisphosphate 3-kinase catalytic subunit gamma [Source:MGI Symbol;Acc:MGI:1353576]	30955	Q9JHG7;Q3UVA4;Q8C5Q7
ENSMUSG00000026896	8164.25	269.501	16059	59.588	5.89695	1.58554e-104	1.39079e-102	2	62426142	62476599	-	8165	Ifih1	GO:0000166;GO:0002376;GO:0003677;GO:0003723;GO:0003724;GO:0003725;GO:0003725;GO:0003725;GO:0003725;GO:0003727;GO:0003727;GO:0003727;GO:0003727;GO:0004386;GO:0005515;GO:0005515;GO:0005524;GO:0005524;GO:0005634;GO:0005737;GO:0005737;GO:0008270;GO:0008270;GO:0008270;GO:0008270;GO:0009615;GO:0009615;GO:0016787;GO:0016787;GO:0016925;GO:0016925;GO:0016925;GO:0032727;GO:0032727;GO:0032727;GO:0032728;GO:…	K12647	EC:3.6.4.13	A	1AYAQ;0V4TZ;190AY;KOG0354;1CTWW;0DF53;12NQ7;09TUS;0UQBF	interferon induced with helicase C domain 1 [Source:MGI Symbol;Acc:MGI:1918836]	71586	Q8R5F7;Q3TGP5;D2CGM4
ENSMUSG00000049037	4195.56	1068.32	7322.8	6.85451	2.77705	3.70039e-104	3.22691e-102	6	122898807	122911578	+	1558	Clec4a1	GO:0003674;GO:0005575;GO:0008150;GO:0016020;GO:0016021;GO:0030246;	K10057	-	T;V	0DMIX;13Q9N;1AWSU;0UUEM;KOG4297;0VFYN;1D1TH;0A53A	C-type lectin domain family 4, member a1 [Source:MGI Symbol;Acc:MGI:3036291]	269799	Q80UI7
ENSMUSG00000071757	719.304	86.5266	1352.08	15.6262	3.9659	4.87183e-104	4.22377e-102	15	57558061	57703228	+	4434	Zhx2	GO:0000122;GO:0000122;GO:0000981;GO:0003677;GO:0003677;GO:0005515;GO:0005515;GO:0005634;GO:0005634;GO:0005634;GO:0005634;GO:0005654;GO:0005654;GO:0005829;GO:0005829;GO:0006357;GO:0006357;GO:0006402;GO:0007399;GO:0030154;GO:0035019;GO:0042802;GO:0042802;GO:0042803;GO:0042803;GO:0042803;GO:0045665;GO:0045892;GO:0045892;GO:0045892;GO:0046872;GO:0046982;GO:0046982;GO:0046982;GO:0060040;	-	-	K	13KXP;0UFNS;0IHET;18XRZ;0DJ6M;1B3Q6;09X5D;1CTYI;0V8S2	zinc fingers and homeoboxes 2 [Source:MGI Symbol;Acc:MGI:2683087]	387609	Q8C0C0
ENSMUSG00000030595	1715	353.7	3076.31	8.69749	3.1206	7.92641e-104	6.83229e-102	7	28457676	28466937	-	2169	Nfkbib	GO:0005515;GO:0005634;GO:0005737;GO:0005737;GO:0005829;GO:0005829;GO:0007165;GO:0007165;GO:0007253;GO:0007253;GO:0071222;GO:0071222;GO:0005515;GO:0005634;GO:0005737;GO:0005737;GO:0005829;GO:0005829;GO:0007165;GO:0007165;GO:0007253;GO:0007253;GO:0071222;GO:0071222;	K02581	-	K;E	1CS66;1AZB4;18W6D;KOG0504;13NER;0V753;0DHG0;09W6V;0UJMB	nuclear factor of kappa light polypeptide gene enhancer in B cells inhibitor, beta [Source:MGI Symbol;Acc:MGI:104752]	18036	Q60778
ENSMUSG00000027808	9237.85	2589.16	15886.5	6.13578	2.61725	2.53894e-103	2.1759e-101	3	58427238	58433313	-	4611	Serp1	GO:0001501;GO:0005783;GO:0005783;GO:0005789;GO:0005881;GO:0005881;GO:0006006;GO:0006486;GO:0006486;GO:0006486;GO:0009791;GO:0010259;GO:0015031;GO:0016020;GO:0016021;GO:0030968;GO:0030968;GO:0032024;GO:0045727;GO:0046622;GO:0048644;GO:0060124;	-	-	K;U	KOG3491;0DVN7;196IY;0AADW;0UWDQ;0VMC4;1D4YE;1B6QJ;13WAQ	stress-associated endoplasmic reticulum protein 1 [Source:MGI Symbol;Acc:MGI:92638]	28146	Q9Z1W5
ENSMUSG00000032788	2069.68	3693.12	446.247	0.120832	-3.04892	1.20383e-102	1.0258e-100	10	78272578	78300809	-	5397	Pdxk	GO:0000166;GO:0000287;GO:0005524;GO:0005524;GO:0005654;GO:0005737;GO:0005829;GO:0005829;GO:0008270;GO:0008478;GO:0008478;GO:0008478;GO:0008478;GO:0009443;GO:0009443;GO:0009443;GO:0016301;GO:0016310;GO:0016740;GO:0030170;GO:0030955;GO:0031402;GO:0031403;GO:0036094;GO:0042803;GO:0042823;GO:0043066;GO:0046872;GO:0070280;	K00868	EC:2.7.1.35	H	09X8K;1CTAX;0V879;12QTC;KOG2599;0UM4Y;0DIK4;1ARR7;18UV0	pyridoxal (pyridoxine, vitamin B6) kinase [Source:MGI Symbol;Acc:MGI:1351869]	216134	Q8K183
ENSMUSG00000024754	1193.34	212.271	2174.42	10.2436	3.35665	1.33049e-102	1.12729e-100	19	21755706	21835724	+	8520	Cemip2	GO:0001525;GO:0004415;GO:0004415;GO:0004415;GO:0005509;GO:0005509;GO:0005509;GO:0005886;GO:0005886;GO:0005886;GO:0005887;GO:0005887;GO:0005887;GO:0007275;GO:0008152;GO:0016020;GO:0016021;GO:0016787;GO:0016798;GO:0030214;GO:0030214;GO:0030214;GO:0043231;GO:0043231;GO:1903670;GO:0001525;GO:0004415;GO:0004415;GO:0005509;GO:0005509;GO:0005886;GO:0005886;GO:0005887;GO:0005887;GO:0007275;GO:0008152;GO:…	K22144	EC:3.2.1.35	S	0V9F4;1AU2R;0UQAV;1CUR8;12SC1;09YCH;0DJXS;19009;0IFCM	cell migration inducing hyaluronidase 2 [Source:MGI Symbol;Acc:MGI:1890373]	83921	Q5FWI3;Q8BS93
ENSMUSG00000042333	885.754	130.258	1641.25	12.6	3.65536	1.37405e-102	1.15761e-100	4	155006390	155013020	-	1438	Tnfrsf14	GO:0016020;GO:0016021;GO:0001618;GO:0002250;GO:0002376;GO:0002720;GO:0002720;GO:0005515;GO:0005886;GO:0005886;GO:0005886;GO:0009897;GO:0009897;GO:0016020;GO:0016021;GO:0016032;GO:0019955;GO:0031295;GO:0031625;GO:0045087;GO:0046642;GO:0046642;GO:0046718;GO:0050731;GO:0050731;GO:0050829;GO:0050829;GO:0050830;GO:0050830;GO:1905675;GO:2000406;GO:2000406;GO:0016020;GO:0016021;	K05152	-	-	-	tumor necrosis factor receptor superfamily, member 14 (herpesvirus entry mediator) [Source:MGI Symbol;Acc:MGI:2675303]	230979	Q80WM9
ENSMUSG00000020572	14655.9	4241.03	25070.7	5.91148	2.56352	1.53942e-102	1.28965e-100	12	32869544	32903348	+	5054	Nampt	GO:0000166;GO:0001774;GO:0001774;GO:0003824;GO:0004514;GO:0005125;GO:0005125;GO:0005125;GO:0005576;GO:0005615;GO:0005634;GO:0005634;GO:0005634;GO:0005737;GO:0005737;GO:0005737;GO:0005829;GO:0005886;GO:0005886;GO:0007165;GO:0007565;GO:0007568;GO:0007623;GO:0007623;GO:0008144;GO:0009435;GO:0009435;GO:0009435;GO:0010507;GO:0010507;GO:0014070;GO:0014916;GO:0014916;GO:0016607;GO:0016607;GO:0016740;GO:…	K03462	EC:2.4.2.12	H	133FK;0A1S4;0DPEB;0VCMR;0IEB2;1CYC7;18YC7;0UITD;1B0MA	nicotinamide phosphoribosyltransferase [Source:MGI Symbol;Acc:MGI:1929865]	59027	Q99KQ4
ENSMUSG00000015316	249.36	0.352975	498.368	1411.91	10.4634	2.98568e-102	2.48729e-100	1	171594695	171628752	+	6156	Slamf1	GO:0001779;GO:0001787;GO:0002232;GO:0002250;GO:0002277;GO:0002376;GO:0002725;GO:0005515;GO:0005515;GO:0005886;GO:0006909;GO:0007155;GO:0009897;GO:0009986;GO:0009986;GO:0010759;GO:0016020;GO:0016021;GO:0016021;GO:0031338;GO:0032689;GO:0032695;GO:0032715;GO:0032720;GO:0032729;GO:0035744;GO:0038023;GO:0038023;GO:0042104;GO:0042169;GO:0042802;GO:0045087;GO:0045335;GO:0046330;GO:0046649;GO:0050790;GO:…	K06536	-	T	0UUF2;0A4QE;13MVR;1AUYF;18W0I;0DS6N;0VFJG;1D1FR;0IFKK	signaling lymphocytic activation molecule family member 1 [Source:MGI Symbol;Acc:MGI:1351314]	27218	Q9QUM4;Q544K1
ENSMUSG00000038352	1227.36	222.353	2232.37	10.0398	3.32765	3.98556e-102	3.30182e-100	11	97880404	97887007	-	2073	Arl5c	GO:0000166;GO:0005525;GO:0005525;GO:0005525;GO:0005802;GO:0006886;GO:0016192;GO:1903292;GO:0000166;GO:0005525;GO:0005525;	K07960	-	U	0VDRK;0USJV;0A2WB;1CZKH;0DQI8;13KQY;192ZV;KOG0070;1B436	ADP-ribosylation factor-like 5C [Source:MGI Symbol;Acc:MGI:3028577]	217151	Q6P068
ENSMUSG00000033355	2259.27	274.11	4244.43	15.4844	3.95274	7.2139e-102	5.9433e-100	16	23339041	23432972	+	2131	Rtp4	GO:0001580;GO:0001580;GO:0005515;GO:0005737;GO:0005737;GO:0006612;GO:0006612;GO:0016020;GO:0016021;GO:0031849;GO:0051205;GO:0051607;GO:0001580;GO:0001580;GO:0005515;GO:0005737;GO:0005737;GO:0006612;GO:0006612;GO:0016020;GO:0016021;GO:0031849;GO:0051205;GO:0051607;GO:0001580;GO:0001580;GO:0005515;GO:0005737;GO:0005737;GO:0006612;GO:0006612;GO:0016020;GO:0016021;GO:0031849;GO:0051205;GO:0051607;	-	-	T;U	13PC0;1967W;1B03R;09WVI;0UUMV;0DTMI;0IH22;0VEXE;1D1CR	receptor transporter protein 4 [Source:MGI Symbol;Acc:MGI:1915025]	67775	Q9ER80
ENSMUSG00000016496	6445.7	1552.81	11338.6	7.302	2.86829	1.83156e-101	1.50067e-99	19	29344855	29365495	+	3622	Cd274	GO:0002250;GO:0002376;GO:0002845;GO:0002845;GO:0002845;GO:0005515;GO:0005515;GO:0005654;GO:0005768;GO:0005886;GO:0005886;GO:0005886;GO:0006955;GO:0006955;GO:0006955;GO:0007165;GO:0007165;GO:0007166;GO:0007166;GO:0007166;GO:0009897;GO:0009897;GO:0009986;GO:0009986;GO:0015629;GO:0016020;GO:0016021;GO:0030335;GO:0030335;GO:0031295;GO:0031295;GO:0031295;GO:0031901;GO:0031901;GO:0031901;GO:0032689;GO:…	K06745	-	T	09W7E;1CS6T;13QT3;1AVR7;18WQ4;0IIBU;0V75P;0DHGI;0UJ64	CD274 antigen [Source:MGI Symbol;Acc:MGI:1926446]	60533	Q9EP73;Q3U472
ENSMUSG00000024164	4315.9	351.185	8280.62	23.5791	4.55943	2.49163e-101	2.03034e-99	17	57510970	57535136	-	5143	C3	GO:0001798;GO:0001934;GO:0001934;GO:0001934;GO:0001970;GO:0002376;GO:0004866;GO:0005515;GO:0005515;GO:0005576;GO:0005576;GO:0005576;GO:0005615;GO:0005615;GO:0005615;GO:0005615;GO:0005615;GO:0006629;GO:0006631;GO:0006954;GO:0006954;GO:0006956;GO:0006956;GO:0006956;GO:0006956;GO:0006957;GO:0006958;GO:0007596;GO:0008289;GO:0009617;GO:0009986;GO:0010575;GO:0010575;GO:0010828;GO:0010828;GO:0010828;GO:…	K03990	-	O;V	1CWM0;1AZ7Z;0V9VN;0URWM;18WYI;13MNB;KOG1366;09YXX;0DKCZ	complement component 3 [Source:MGI Symbol;Acc:MGI:88227]	12266	P01027
ENSMUSG00000042675	904.937	1687.28	122.59	0.0726553	-3.78279	4.56973e-101	3.70347e-99	7	126376127	126379686	+	1848	Ypel3	GO:0003674;GO:0005575;GO:0005634;GO:0005730;GO:0006915;GO:0046872;GO:2000774;GO:0003674;GO:0005575;GO:0005634;GO:0005730;GO:0006915;GO:0046872;GO:2000774;GO:0003674;GO:0005575;GO:0005634;GO:0005730;GO:0006915;GO:0046872;GO:2000774;GO:2000774;GO:0003674;GO:0005575;GO:0005634;GO:0005730;GO:0006915;GO:0046872;GO:2000774;	-	-	S;U	1D1KX;192ZK;13RB7;0UUQ2;0VFQX;0A4WA;0DSBH;1B5IP;KOG3399	yippee like 3 [Source:MGI Symbol;Acc:MGI:1913340]	66090	P61237
ENSMUSG00000020400	8623.35	1474.68	15772	10.6952	3.41889	1.55725e-100	1.25523e-98	11	54801611	54853743	-	3539	Tnip1	GO:0002755;GO:0043124;GO:0050727;GO:0070373;GO:0002755;GO:0043124;GO:0050727;GO:0070373;GO:0002755;GO:0043124;GO:0050727;GO:0070373;GO:0002755;GO:0002755;GO:0005515;GO:0005634;GO:0005654;GO:0005737;GO:0005737;GO:0005829;GO:0006954;GO:0007159;GO:0007159;GO:0009101;GO:0031593;GO:0031593;GO:0042802;GO:0043124;GO:0043124;GO:0043124;GO:0043124;GO:0045944;GO:0045944;GO:0050727;GO:0050729;GO:0051019;GO:…	K23829	-	T;K	0VAEF;1CVUX;09ZH8;0UQ2W;1B0F2;0DM03;19116;0IEGE;13CJI	TNFAIP3 interacting protein 1 [Source:MGI Symbol;Acc:MGI:1926194]	57783	Q9WUU8
ENSMUSG00000038843	1204.14	2362.51	45.7747	0.0193754	-5.68963	3.24136e-100	2.59867e-98	19	17303505	17350208	-	5760	Gcnt1	GO:0000139;GO:0003829;GO:0003829;GO:0003829;GO:0005615;GO:0005615;GO:0005794;GO:0005802;GO:0005802;GO:0006486;GO:0009101;GO:0009101;GO:0009101;GO:0016020;GO:0016020;GO:0016021;GO:0016740;GO:0016757;GO:0018215;GO:0031985;GO:0031985;GO:0031985;GO:0032868;GO:0048729;GO:0050901;GO:0050901;GO:0050901;GO:0060352;GO:0060352;GO:0060352;GO:0060993;GO:0000139;GO:0003829;GO:0003829;GO:0005615;GO:0005794;GO:…	K00727	EC:2.4.1.102	-	-	glucosaminyl (N-acetyl) transferase 1, core 2 [Source:MGI Symbol;Acc:MGI:95676]	14537	Q09324
ENSMUSG00000080316	1034.64	175.288	1893.99	10.805	3.43363	1.04618e-99	8.34262e-98	17	18047420	18063271	+	7067	Spaca6	GO:0007342;GO:0007342;GO:0016020;GO:0016021;GO:0001669;GO:0002080;GO:0003674;GO:0007338;GO:0007342;GO:0007342;GO:0007342;GO:0007342;GO:0016020;GO:0016021;GO:0016021;GO:0031410;GO:0007342;GO:0007342;GO:0007342;	-	-	S	0UVVM;0A8WG;0VJST;0DV9U;0J0E7;13UVB;1D4KF;1B6I2;19425	sperm acrosome associated 6 [Source:MGI Symbol;Acc:MGI:1922452]	75202	E9Q8Q8
ENSMUSG00000034522	382.813	757.499	8.12708	0.0107288	-6.54236	1.10019e-99	8.72663e-98	14	65595838	65636379	+	4733	Zfp395	GO:0000978;GO:0000978;GO:0000987;GO:0001228;GO:0003677;GO:0003700;GO:0005634;GO:0005634;GO:0005654;GO:0005737;GO:0005829;GO:0006357;GO:0006357;GO:0045944;GO:0000978;GO:0000978;GO:0000978;GO:0000987;GO:0000987;GO:0001228;GO:0001228;GO:0003677;GO:0003677;GO:0003700;GO:0005634;GO:0005634;GO:0005634;GO:0005654;GO:0005654;GO:0005737;GO:0005737;GO:0005829;GO:0005829;GO:0006357;GO:0006357;GO:0016607;GO:…	-	-	S	0II8D;13MGV;0UHCQ;1CS5Q;1B2JM;18UNX;0DHFJ;09W6B;0V74N	zinc finger protein 395 [Source:MGI Symbol;Acc:MGI:2682318]	380912	E9Q5N9
ENSMUSG00000021024	4001.31	1068.95	6933.66	6.4864	2.69742	1.39306e-98	1.09912e-96	12	55431007	55465239	+	1234	Psma6	GO:0000502;GO:0005634;GO:0005737;GO:0005839;GO:0019773;GO:0019773;GO:0051603;GO:0000502;GO:0000502;GO:0000932;GO:0003723;GO:0003723;GO:0004175;GO:0005515;GO:0005634;GO:0005634;GO:0005634;GO:0005654;GO:0005654;GO:0005654;GO:0005737;GO:0005737;GO:0005737;GO:0005829;GO:0005839;GO:0005839;GO:0005839;GO:0005839;GO:0005844;GO:0005844;GO:0006511;GO:0007519;GO:0010499;GO:0016363;GO:0019773;GO:0019773;GO:…	K02730	EC:3.4.25.1	O;K	1CTZX;0V8T4;18V1F;KOG0182;09W1B;1AS2P;12R1B;0DJ7Z;0UG9Q	proteasome subunit alpha 6 [Source:MGI Symbol;Acc:MGI:1347006]	26443	Q9QUM9
ENSMUSG00000018395	1778.81	3175.68	381.947	0.120272	-3.05562	4.89695e-98	3.84333e-96	11	53458206	53492794	+	3586	Kif3a	GO:0000166;GO:0003774;GO:0003777;GO:0005524;GO:0005524;GO:0005874;GO:0007018;GO:0008017;GO:0000166;GO:0001701;GO:0001822;GO:0001947;GO:0003341;GO:0003777;GO:0003777;GO:0005515;GO:0005515;GO:0005515;GO:0005515;GO:0005524;GO:0005524;GO:0005737;GO:0005813;GO:0005814;GO:0005814;GO:0005829;GO:0005856;GO:0005871;GO:0005874;GO:0005874;GO:0005876;GO:0005929;GO:0005929;GO:0005930;GO:0007018;GO:0007018;GO:…	K10394	-	Z	0DFD2;1CQ2S;0UIV4;18XR1;0V4YP;12NHW;KOG0240;09TZU;1AUC0	kinesin family member 3A [Source:MGI Symbol;Acc:MGI:107689]	16568	P28741;Q3UF02
ENSMUSG00000063450	989.596	169.064	1810.13	10.7068	3.42045	7.68351e-98	5.99877e-96	12	75864908	76157700	+	26726	Syne2	GO:0003779;GO:0005635;GO:0034993;GO:0051015;GO:0003779;GO:0005634;GO:0005635;GO:0005640;GO:0016020;GO:0016021;GO:0016021;GO:0034993;GO:0051015;GO:0003779;GO:0005515;GO:0005634;GO:0005634;GO:0005634;GO:0005635;GO:0005635;GO:0005635;GO:0005635;GO:0005635;GO:0005640;GO:0005654;GO:0005737;GO:0005737;GO:0005737;GO:0005739;GO:0005739;GO:0005739;GO:0005856;GO:0005886;GO:0005925;GO:0005925;GO:0006998;GO:…	K19346	-	Z	1CWVG;09UB4;0UR7S;0V5A9;191MY;1AXTW;12UBG;KOG0516;0DFKT	spectrin repeat containing, nuclear envelope 2 [Source:MGI Symbol;Acc:MGI:2449316]	319565	Q6ZWQ0
ENSMUSG00000024308	5468.7	1539.76	9397.63	6.10331	2.60959	1.16421e-97	9.04201e-96	17	34134873	34148266	+	3628	Tapbp	GO:0002397;GO:0016020;GO:0016020;GO:0016021;GO:0019885;GO:0042824;GO:0062061;GO:0065003;GO:0000139;GO:0002398;GO:0002479;GO:0005515;GO:0005783;GO:0005789;GO:0005789;GO:0005887;GO:0006952;GO:0010468;GO:0016020;GO:0016020;GO:0016021;GO:0019885;GO:0030670;GO:0042824;GO:0046978;GO:0046979;GO:0050823;GO:0061635;GO:0062061;GO:0065003;	K08058	-	U	0VEP4;0II43;1ASXK;1D0KM;0DQWW;0UU10;18W5I;09XFN;13IBE	TAP binding protein [Source:MGI Symbol;Acc:MGI:1201689]	21356	Q9R233;Q3U9A3;Q8C6N4;Q9D679
ENSMUSG00000047747	553.088	1063.93	42.2448	0.0397063	-4.65449	2.00525e-97	1.54934e-95	8	83589985	83817897	+	17242	Rnf150	GO:0005737;GO:0006511;GO:0016020;GO:0016021;GO:0016567;GO:0046872;GO:0061630;	-	-	O	1CV47;KOG0800;1B34Y;194Q8;0DKA8;09YV7;13KB3;0V9T0;0UN3X	ring finger protein 150 [Source:MGI Symbol;Acc:MGI:2443860]	330812	Q5DTZ6
ENSMUSG00000039501	9331.56	2756.06	15907.1	5.77167	2.52899	2.5222e-97	1.93871e-95	2	166877713	166904935	-	8189	Znfx1	GO:0003700;GO:0003723;GO:0004386;GO:0005634;GO:0006355;GO:0008270;GO:0031048;GO:0031380;GO:0046872;GO:0003700;GO:0004386;GO:0005634;GO:0006355;GO:0008270;GO:0046872;GO:0004386;GO:0004386;	-	-	L	0V51M;0UFUX;12Q27;1CQ21;0DFCA;09U2N;18SFG;KOG1807;1ARPR	zinc finger, NFX1-type containing 1 [Source:MGI Symbol;Acc:MGI:2138982]	98999	Q8R151
ENSMUSG00000021670	2967.99	765.227	5170.75	6.75714	2.75641	3.92863e-97	3.00429e-95	13	96785475	96807444	-	7275	Hmgcr	GO:0004420;GO:0004420;GO:0004420;GO:0004420;GO:0005777;GO:0005778;GO:0005778;GO:0005778;GO:0005783;GO:0005783;GO:0005789;GO:0005789;GO:0005789;GO:0006629;GO:0006694;GO:0006695;GO:0006695;GO:0006695;GO:0006743;GO:0006743;GO:0007568;GO:0007584;GO:0008202;GO:0008203;GO:0008284;GO:0008284;GO:0008299;GO:0008299;GO:0008299;GO:0008299;GO:0008542;GO:0010664;GO:0010664;GO:0010666;GO:0010666;GO:0015936;GO:…	K00021	EC:1.1.1.34	I	12RVD;0DKU1;KOG2480;1CVNY;0V8UA;18Y05;0UNT4;1B51M;09ZBN	3-hydroxy-3-methylglutaryl-Coenzyme A reductase [Source:MGI Symbol;Acc:MGI:96159]	15357	Q01237;Q8BV96
ENSMUSG00000034422	23493.8	1706.13	45281.5	26.5405	4.73013	5.83792e-97	4.44159e-95	16	35653244	35691914	-	9306	Parp14	GO:0002376;GO:0003714;GO:0003950;GO:0003950;GO:0003950;GO:0003950;GO:0005515;GO:0005515;GO:0005634;GO:0005634;GO:0005737;GO:0005737;GO:0005737;GO:0005737;GO:0005829;GO:0005829;GO:0005886;GO:0005886;GO:0006471;GO:0006471;GO:0010629;GO:0010629;GO:0010629;GO:0016740;GO:0016757;GO:0019899;GO:0019899;GO:0042531;GO:0042531;GO:0042532;GO:0042532;GO:0045087;GO:0045892;GO:0060336;GO:0060336;GO:0060336;GO:…	K15261	EC:2.4.2.30	K;B	1AWYB;KOG2633;09Z6H;0UPNT;19113;12QR3;0VA3U;1CPQR;0DKND	poly (ADP-ribose) polymerase family, member 14 [Source:MGI Symbol;Acc:MGI:1919489]	547253	Q2EMV9
ENSMUSG00000051413	3751.45	1012.7	6490.2	6.40881	2.68006	8.28117e-97	6.26847e-95	2	153069679	153083346	-	5735	Plagl2	GO:0000981;GO:0001228;GO:0005634;GO:0005634;GO:0006351;GO:0006357;GO:0006629;GO:0009791;GO:0034378;GO:0043565;GO:0043565;GO:0045944;GO:2001244;GO:0000981;GO:0001228;GO:0001228;GO:0005634;GO:0005634;GO:0006351;GO:0006357;GO:0006629;GO:0009791;GO:0034378;GO:0043565;GO:0043565;GO:0043565;GO:0045944;GO:2001244;	K19486	-	K	0V4UC;09TV4;13M37;KOG1721;0UI01;1AUWF;0DGA0;18ZYB;1CQZE	pleiomorphic adenoma gene-like 2 [Source:MGI Symbol;Acc:MGI:1933165]	54711	Q925T4
ENSMUSG00000011008	2950.46	762.739	5138.19	6.73649	2.752	1.01284e-96	7.62799e-95	3	145855588	145901268	+	3288	Mcoln2	GO:0002250;GO:0002376;GO:0005261;GO:0005262;GO:0005764;GO:0005768;GO:0006811;GO:0006816;GO:0015031;GO:0016020;GO:0016020;GO:0016021;GO:0032722;GO:0042802;GO:0045087;GO:0051209;GO:0055037;GO:0055038;GO:0070588;GO:0071639;GO:0071642;GO:0071651;GO:0072345;GO:1905517;GO:1990266;GO:2000341;GO:2000343;GO:0002250;GO:0002376;GO:0005261;GO:0005262;GO:0005764;GO:0005768;GO:0006811;GO:0006816;GO:0015031;GO:…	K04993	-	P	1AT4A;0DIN0;09XAK;KOG3733;0V88X;1CTCW;195F8;0URPK;12T8J	mucolipin 2 [Source:MGI Symbol;Acc:MGI:1915529]	68279	Q8K595
ENSMUSG00000030142	32777.5	147.488	65407.5	443.475	8.79271	1.22953e-96	9.21345e-95	6	123258748	123266829	-	4965	Clec4e	GO:0001819;GO:0002221;GO:0002221;GO:0002292;GO:0002376;GO:0005509;GO:0005509;GO:0005515;GO:0006955;GO:0016020;GO:0016020;GO:0016021;GO:0030246;GO:0038023;GO:0038094;GO:0038187;GO:0038187;GO:0042742;GO:0045087;GO:0045087;GO:0046872;GO:0030246;GO:0016020;GO:0016021;	K10059	-	T;V	190YU;1ASJP;0A26J;0VD26;13PWZ;KOG4297;1CYTX;0DJCR;0UJMI	C-type lectin domain family 4, member e [Source:MGI Symbol;Acc:MGI:1861232]	56619	Q9R0Q8;Q4FK29
ENSMUSG00000039116	1140.07	214.098	2066.04	9.64997	3.27052	1.39084e-96	1.03701e-94	10	14278327	14421403	-	12228	Adgrg6	GO:0004888;GO:0004930;GO:0004930;GO:0004930;GO:0004930;GO:0005515;GO:0005518;GO:0005737;GO:0005886;GO:0005886;GO:0005887;GO:0007005;GO:0007165;GO:0007166;GO:0007166;GO:0007186;GO:0007186;GO:0007189;GO:0007189;GO:0009986;GO:0014037;GO:0016020;GO:0016020;GO:0016021;GO:0016021;GO:0019933;GO:0019933;GO:0022011;GO:0022011;GO:0042552;GO:0042552;GO:0043236;GO:0043236;GO:0050840;GO:0060347;GO:0060347;GO:…	K08463	-	O;T	0URCV;1CRRY;KOG3714;12R5K;1B35H;09VTE;0V6S6;0DH1R;KOG4193;1928V	adhesion G protein-coupled receptor G6 [Source:MGI Symbol;Acc:MGI:1916151]	215798	Q6F3F9
ENSMUSG00000025059	1340.57	272.825	2408.31	8.82732	3.14198	1.66373e-96	1.23431e-94	X	84745543	84820425	-	7743	Gk	GO:0000166;GO:0004370;GO:0004370;GO:0004370;GO:0004370;GO:0005524;GO:0005634;GO:0005737;GO:0005739;GO:0005739;GO:0005739;GO:0005741;GO:0005975;GO:0006071;GO:0006071;GO:0006071;GO:0006072;GO:0006641;GO:0016020;GO:0016301;GO:0016310;GO:0016310;GO:0016740;GO:0016773;GO:0016773;GO:0019217;GO:0019563;GO:0042393;GO:0042593;GO:0045471;GO:0046167;GO:0000166;GO:0004370;GO:0004370;GO:0004370;GO:0004370;GO:…	K00864	EC:2.7.1.30	G	KOG2517;18WPH;0UFQA;0DHQ5;09UHN;1ARJJ;0V5GV;12P47;1CSEH	glycerol kinase [Source:MGI Symbol;Acc:MGI:106594]	14933	Q64516;Q3TEN9;Q3TET2
ENSMUSG00000025790	730.596	26.1406	1435.05	54.8974	5.77866	2.00586e-96	1.48076e-94	7	73925167	74204528	-	8474	Slco3a1	GO:0001934;GO:0005886;GO:0005886;GO:0005887;GO:0006811;GO:0015347;GO:0015732;GO:0015732;GO:0016020;GO:0016020;GO:0016021;GO:0016324;GO:0043252;GO:0051092;GO:0055085;GO:0001934;GO:0001934;GO:0005886;GO:0005886;GO:0005886;GO:0005887;GO:0005887;GO:0006811;GO:0006857;GO:0008514;GO:0009925;GO:0009986;GO:0015347;GO:0015711;GO:0015732;GO:0015732;GO:0015732;GO:0016020;GO:0016020;GO:0016021;GO:0035672;GO:…	K14353	-	Q;P	0V4MT;0UGNI;12NAH;KOG3626;0DIMK;1CTCG;18WZ2;09TNP;1AWNE	solute carrier organic anion transporter family, member 3a1 [Source:MGI Symbol;Acc:MGI:1351867]	108116	Q8R3L5
ENSMUSG00000027360	253.037	2.14869	503.925	234.527	7.87361	3.15556e-96	2.31802e-94	2	126435587	126461219	-	6389	Hdc	GO:0001692;GO:0001694;GO:0001694;GO:0001694;GO:0001694;GO:0003824;GO:0004398;GO:0004398;GO:0004398;GO:0004398;GO:0005737;GO:0005829;GO:0006520;GO:0006547;GO:0006548;GO:0006548;GO:0006548;GO:0016597;GO:0016829;GO:0016831;GO:0016831;GO:0016831;GO:0019752;GO:0030170;GO:0030170;GO:0030425;GO:0042423;GO:0042802;GO:0043025;	K01590	EC:4.1.1.22	E	0DMI5;1CWDD;1ATRU;0VAVF;18X4K;0UQQT;KOG0628;09ZYP;12QW1	histidine decarboxylase [Source:MGI Symbol;Acc:MGI:96062]	15186	P23738
ENSMUSG00000051439	21055.4	2198.56	39912.3	18.1539	4.1822	6.25011e-96	4.56871e-94	18	36858120	36859851	-	1732	Cd14	GO:0001530;GO:0001530;GO:0001530;GO:0001819;GO:0001819;GO:0002237;GO:0002376;GO:0005576;GO:0005615;GO:0005615;GO:0005794;GO:0005794;GO:0005794;GO:0005886;GO:0005886;GO:0005886;GO:0006898;GO:0006954;GO:0006954;GO:0006954;GO:0006954;GO:0009408;GO:0009617;GO:0009617;GO:0009897;GO:0009897;GO:0009897;GO:0009986;GO:0009986;GO:0016020;GO:0031225;GO:0031362;GO:0031362;GO:0031362;GO:0031663;GO:0031663;GO:…	K04391	-	T;W	18TM4;13RSN;0UIW7;09VP7;0V6N2;0DGXI;1B430;0IXG9;1CRMT	CD14 antigen [Source:MGI Symbol;Acc:MGI:88318]	12475	P10810;Q4FJP7;Q3UE54;Q3UB18
ENSMUSG00000070720	230.263	0.383815	460.143	1198.87	10.2275	1.25127e-95	9.10195e-94	4	131648511	131650451	+	1476	Tmem200b	GO:0003674;GO:0005575;GO:0008150;GO:0016020;GO:0016021;GO:0003674;GO:0005575;GO:0008150;GO:0016020;GO:0016021;	-	-	S	0DIW2;1AYEN;1CTMG;09XIN;1954M;KOG4823;0UMIB;0V8GT;13SU4	transmembrane protein 200B [Source:MGI Symbol;Acc:MGI:3646343]	623230	D3Z0P8
ENSMUSG00000005087	20113.4	6273.95	33952.9	5.41173	2.43609	6.77361e-95	4.90331e-93	2	102641486	102732010	-	6776	Cd44	GO:0004896;GO:0005540;GO:0005540;GO:0005794;GO:0005829;GO:0005886;GO:0005902;GO:0007155;GO:0007155;GO:0009986;GO:0016020;GO:0016021;GO:0016021;GO:0016324;GO:0016477;GO:0019221;GO:0030214;GO:0031258;GO:0033138;GO:0034116;GO:0035692;GO:0042110;GO:0042995;GO:0042995;GO:0043066;GO:0043154;GO:0043518;GO:0044319;GO:0044344;GO:0050731;GO:0051216;GO:0070374;GO:0070487;GO:1900625;GO:1902166;GO:2000392;GO:…	K06256	-	W;T	1B3SZ;18UX2;1CUI9;0UNIM;13SK8;0DJR6;09YBF;0V990;0IZCP	CD44 antigen [Source:MGI Symbol;Acc:MGI:88338]	12505	P15379;A2APM2
ENSMUSG00000062585	388.572	764.367	12.7764	0.016715	-5.90271	2.40148e-94	1.72999e-92	4	135622705	135647518	+	3982	Cnr2	GO:0004930;GO:0004930;GO:0004930;GO:0004930;GO:0004949;GO:0004949;GO:0004949;GO:0005515;GO:0005737;GO:0005783;GO:0005783;GO:0005886;GO:0005886;GO:0006954;GO:0007165;GO:0007186;GO:0007186;GO:0007186;GO:0007189;GO:0016020;GO:0016021;GO:0016021;GO:0019222;GO:0019233;GO:0030425;GO:0030425;GO:0030595;GO:0031234;GO:0032229;GO:0032496;GO:0033004;GO:0038171;GO:0042995;GO:0043005;GO:0043025;GO:0043204;GO:…	K04278	-	T	KOG3656;0DQQU;1CSW9;1B4TR;0A2UB;0VDYB;13JGT;191ZZ;0USZR	cannabinoid receptor 2 (macrophage) [Source:MGI Symbol;Acc:MGI:104650]	12802	P47936
ENSMUSG00000032122	8295.79	14081.6	2510.02	0.178249	-2.48804	3.77988e-94	2.70988e-92	9	37138881	37167034	-	6643	Slc37a2	GO:0005783;GO:0005789;GO:0006072;GO:0006127;GO:0008643;GO:0015169;GO:0015297;GO:0015760;GO:0015760;GO:0015760;GO:0015794;GO:0016020;GO:0016021;GO:0016021;GO:0022857;GO:0030176;GO:0030176;GO:0030176;GO:0035435;GO:0035435;GO:0035435;GO:0055085;GO:0061513;GO:0061513;GO:0061513;GO:0005783;GO:0005789;GO:0006072;GO:0006127;GO:0008643;GO:0015169;GO:0015297;GO:0015760;GO:0015760;GO:0015760;GO:0015760;GO:…	K13783	-	P;G	0IP3Z;1DEWU;1BAUJ;0B3U9;0V2X4;1973T;0E7X8;13C4R;0WG8R	solute carrier family 37 (glycerol-3-phosphate transporter), member 2 [Source:MGI Symbol;Acc:MGI:1929693]	56857	Q9WU81
ENSMUSG00000008855	1090.62	1989.48	191.768	0.0963911	-3.37496	5.12136e-94	3.65405e-92	11	102085258	102120992	-	8780	Hdac5	GO:0000118;GO:0000118;GO:0004407;GO:0004407;GO:0005634;GO:0005634;GO:0005737;GO:0006325;GO:0006325;GO:0016575;GO:0016787;GO:0032041;GO:0040029;GO:0046872;GO:0070932;GO:0000118;GO:0000118;GO:0000122;GO:0000976;GO:0000978;GO:0001085;GO:0003682;GO:0004407;GO:0004407;GO:0004407;GO:0005080;GO:0005634;GO:0005634;GO:0005634;GO:0005634;GO:0005737;GO:0005737;GO:0005737;GO:0005794;GO:0005829;GO:0006325;GO:…	K11406	EC:3.5.1.98	B	KOG1343;0DH82;0UM1F;0V6W3;09URG;1AXXP;1CRY6;12P3Q;18YWB	histone deacetylase 5 [Source:MGI Symbol;Acc:MGI:1333784]	15184	Q3UJF1;Q6P9T4
ENSMUSG00000038332	1159.77	2106.62	212.916	0.10107	-3.30658	8.09944e-94	5.75138e-92	10	41685931	41784420	+	3982	Sesn1	GO:0001650;GO:0005634;GO:0005634;GO:0005654;GO:0005737;GO:0005737;GO:0034198;GO:0042149;GO:0061700;GO:0070728;GO:0072593;GO:0098869;GO:1901031;GO:1904262;GO:0001650;GO:0005515;GO:0005634;GO:0005634;GO:0005634;GO:0005654;GO:0005737;GO:0005737;GO:0005737;GO:0016239;GO:0016491;GO:0016684;GO:0030308;GO:0031932;GO:0034198;GO:0034198;GO:0042149;GO:0051896;GO:0055114;GO:0061700;GO:0061700;GO:0061700;GO:…	K10141	-	S;J	KOG3746;09WFN;0V7E5;0DH5Z;0UP10;12PWZ;1AVAE;18WBI;1CUY2	sestrin 1 [Source:MGI Symbol;Acc:MGI:2155278]	140742	P58006
ENSMUSG00000021367	1111.17	4.8354	2217.51	458.599	8.84109	6.78135e-93	4.79258e-91	13	42454952	42461466	+	2139	Edn1	GO:0000122;GO:0000122;GO:0001501;GO:0001516;GO:0001516;GO:0001569;GO:0001666;GO:0001666;GO:0001701;GO:0001821;GO:0001821;GO:0003100;GO:0003100;GO:0003100;GO:0005102;GO:0005125;GO:0005125;GO:0005179;GO:0005179;GO:0005179;GO:0005515;GO:0005576;GO:0005576;GO:0005615;GO:0005615;GO:0005615;GO:0005615;GO:0005737;GO:0005737;GO:0006874;GO:0006885;GO:0007166;GO:0007166;GO:0007186;GO:0007186;GO:0007193;GO:…	K16366	-	T;W	0UM0E;0V842;13QFQ;0IWVG;09X5H;192NH;1AWGE;0DIGI;1CT73	endothelin 1 [Source:MGI Symbol;Acc:MGI:95283]	13614	P22387;Q544E0
ENSMUSG00000009376	2627.64	223.898	5031.37	22.4717	4.49004	1.29643e-92	9.11903e-91	6	17463799	17573979	+	7679	Met	GO:0000166;GO:0001886;GO:0004672;GO:0004713;GO:0004713;GO:0004714;GO:0004714;GO:0005524;GO:0005524;GO:0006468;GO:0007169;GO:0009925;GO:0016020;GO:0016021;GO:0016021;GO:0017154;GO:0018108;GO:0019903;GO:0031116;GO:0035024;GO:0042802;GO:0045944;GO:0048754;GO:0050918;GO:0051497;GO:0061436;GO:0070495;GO:0071526;GO:0071526;GO:1901299;GO:1905098;GO:2001028;GO:0017154;GO:0071526;GO:0000166;GO:0004672;GO:…	K05099	EC:2.7.10.1	T	0E8CA;1BB15;KOG1095;0V36G;13D6S;0B4IB;1977Z;1DFAU;KOG3610;0WH1X	met proto-oncogene [Source:MGI Symbol;Acc:MGI:96969]	17295	F8VQL0;A4FUV6
ENSMUSG00000041058	3185.19	5508.05	862.327	0.156558	-2.67524	2.14018e-92	1.49833e-90	4	19608303	19708993	-	6453	Wwp1	GO:0000209;GO:0004842;GO:0004842;GO:0004842;GO:0005515;GO:0005634;GO:0005737;GO:0005737;GO:0005829;GO:0005886;GO:0006511;GO:0016020;GO:0016567;GO:0016567;GO:0016567;GO:0016740;GO:0030217;GO:0030324;GO:0043161;GO:0043161;GO:0045732;GO:0045892;GO:0061630;GO:0061630;GO:0061630;GO:0061630;GO:0000209;GO:0004842;GO:0004842;GO:0004842;GO:0005515;GO:0005634;GO:0005737;GO:0005737;GO:0005829;GO:0005886;GO:…	K05633	EC:2.3.2.26	O	1AWJ1;1CPJG;KOG0940;09T7I;0UJJ2;0V46G;18S9B;12NJ4;0DEVW	WW domain containing E3 ubiquitin protein ligase 1 [Source:MGI Symbol;Acc:MGI:1861728]	107568	Q8BZZ3;Q3UV52
ENSMUSG00000020589	3636.21	1027.93	6244.49	6.07481	2.60284	3.31963e-91	2.31319e-89	12	12312140	12430966	+	12596	Cyria	GO:0003674;GO:0008150;GO:0016020;GO:0030833;GO:0003674;GO:0008150;GO:0016020;GO:0030833;GO:0003674;GO:0008150;GO:0016020;GO:0030833;	-	-	S	KOG3951;1956Z;09WCM;0DHMW;12N7E;0UJVE;1CSCB;1AVCD;0V7B3	CYFIP related Rac1 interactor A [Source:MGI Symbol;Acc:MGI:1261783]	76820	Q8BHZ0
ENSMUSG00000027435	4193.2	7178.72	1207.69	0.168232	-2.57147	3.49199e-91	2.42198e-89	2	148278560	148285483	-	6677	Cd93	GO:0001849;GO:0001849;GO:0005509;GO:0005886;GO:0005886;GO:0007155;GO:0009986;GO:0016020;GO:0016021;GO:0030246;GO:0031410;GO:0098609;GO:0098609;GO:0098609;	K06702	-	W;T	13J7Q;18U2X;0IJQN;1CXI8;0UQ99;0DNM0;0A0ZM;1ATJD;0VBW3	CD93 antigen [Source:MGI Symbol;Acc:MGI:106664]	17064	O89103
ENSMUSG00000060012	2384.53	4327.51	441.543	0.102032	-3.29291	4.52583e-91	3.1245e-89	14	64884714	65047066	+	13017	Kif13b	GO:0000166;GO:0003774;GO:0003777;GO:0003777;GO:0005524;GO:0005524;GO:0005737;GO:0005829;GO:0005871;GO:0005874;GO:0005902;GO:0007018;GO:0007018;GO:0008017;GO:0008017;GO:0016887;GO:0019901;GO:0030424;GO:0033270;GO:0050770;GO:0071889;GO:0000166;GO:0003774;GO:0003777;GO:0003777;GO:0005515;GO:0005524;GO:0005524;GO:0005737;GO:0005829;GO:0005871;GO:0005874;GO:0005902;GO:0007018;GO:0007018;GO:0008017;GO:…	K17914	-	Z	1CUEV;1B0HR;0UJWR;0V8TH;KOG0245;0DJN0;09Y8U;18YFX;12QSJ	kinesin family member 13B [Source:MGI Symbol;Acc:MGI:1098265]	16554	E9Q4K7
ENSMUSG00000058013	8163.28	1567.21	14759.4	9.41759	3.23536	9.75565e-91	6.70398e-89	5	93241296	93324306	+	9472	Septin11	GO:0000166;GO:0001725;GO:0003924;GO:0005515;GO:0005515;GO:0005525;GO:0005525;GO:0005737;GO:0005856;GO:0005940;GO:0007049;GO:0015630;GO:0030054;GO:0030424;GO:0031105;GO:0031105;GO:0031105;GO:0032153;GO:0034613;GO:0042995;GO:0043197;GO:0045202;GO:0050807;GO:0051301;GO:0060090;GO:0061640;GO:0098794;GO:0098978;GO:0098982;GO:0099629;GO:0000166;GO:0005525;GO:0005525;GO:0005856;GO:0005525;GO:0005856;GO:…	K16939	-	Z;D	0V73G;12QMH;0DHEE;09W55;18WE1;KOG2655;1CS4E;0UJJ4;1B551	septin 11 [Source:MGI Symbol;Acc:MGI:1277214]	52398	Q8C1B7
ENSMUSG00000034265	683.405	1281.38	85.4324	0.0666723	-3.90677	2.53801e-90	1.73609e-88	17	5542832	5804086	+	3078	Zdhhc14	GO:0000139;GO:0005783;GO:0005783;GO:0005783;GO:0005783;GO:0005789;GO:0005794;GO:0005794;GO:0006612;GO:0016020;GO:0016021;GO:0016409;GO:0016409;GO:0016409;GO:0016740;GO:0016746;GO:0018215;GO:0018230;GO:0018230;GO:0018230;GO:0018230;GO:0018345;GO:0018345;GO:0019706;GO:0019706;	K16675	EC:2.3.1.225	S;M	09WN1;1B1ST;0DHXJ;12Q0T;1903M;1CSNA;0V7KM;KOG1311;0UGXP	zinc finger, DHHC domain containing 14 [Source:MGI Symbol;Acc:MGI:2653229]	224454	Q8BQQ1
ENSMUSG00000039934	2535.72	676.466	4394.96	6.49695	2.69976	3.05671e-90	2.08136e-88	5	21391253	21520130	+	10425	Gsap	GO:0001540;GO:0001540;GO:0001540;GO:0005794;GO:0005802;GO:0005802;GO:0005802;GO:0005802;GO:0030162;GO:0030162;GO:0030162;GO:1902004;GO:1902004;GO:1902004;GO:1902004;GO:0001540;GO:0001540;GO:0005794;GO:0005802;GO:0005802;GO:0005802;GO:0030162;GO:0030162;GO:1902004;GO:1902004;GO:1902004;	-	-	S;K	09TMX;1CPN3;0DEYD;1ARU0;0IG5Q;12RXV;0V4KZ;18SN1;0UG1D	gamma-secretase activating protein [Source:MGI Symbol;Acc:MGI:2442259]	212167	Q3TCV3
ENSMUSG00000064289	3261.72	920.638	5602.81	6.08579	2.60544	1.38861e-89	9.41222e-88	2	61408929	61484515	+	6096	Tank	GO:0007249;GO:0004843;GO:0004843;GO:0004843;GO:0005515;GO:0005737;GO:0005829;GO:0005829;GO:0006508;GO:0006974;GO:0006974;GO:0006974;GO:0007249;GO:0007249;GO:0007249;GO:0018215;GO:0031625;GO:0031625;GO:0032991;GO:0032991;GO:0032991;GO:0035800;GO:0035800;GO:0035800;GO:0043124;GO:0043124;GO:0043124;GO:0046872;GO:0071347;GO:0071347;GO:0071347;GO:0071356;GO:0071356;GO:0071356;GO:0071479;GO:0071479;GO:…	K12650	-	S;T	1CWAF;0IGRF;09ZWK;13HRG;0UQMS;18W93;1B4IB;0VAT7;0DMF7	TRAF family member-associated Nf-kappa B activator [Source:MGI Symbol;Acc:MGI:107676]	21353	P70347
ENSMUSG00000025429	2493.83	241.109	4746.54	19.6863	4.29912	2.00861e-89	1.35531e-87	18	77877614	77970579	+	2340	Pstpip2	GO:0003779;GO:0007010;GO:0016477;GO:0003779;GO:0003779;GO:0005515;GO:0005737;GO:0005737;GO:0005829;GO:0005856;GO:0005856;GO:0005884;GO:0005886;GO:0007010;GO:0007010;GO:0008092;GO:0016020;GO:0016477;GO:0030041;GO:0051015;	K20124	-	Z	0B6PJ;197I6;0IU8M;0E9PV;1BBME;0V3ZQ;13GJF;0WJEX;1DGIF	proline-serine-threonine phosphatase-interacting protein 2 [Source:MGI Symbol;Acc:MGI:1335088]	19201	Q99M15
ENSMUSG00000001248	3126.52	884.224	5368.81	6.07178	2.60212	6.39965e-89	4.29872e-87	7	30829552	30855321	-	5239	Gramd1a	GO:0016020;GO:0016021;GO:0005776;GO:0005783;GO:0005789;GO:0005829;GO:0005886;GO:0005886;GO:0006869;GO:0006914;GO:0008289;GO:0015485;GO:0015918;GO:0016020;GO:0016021;GO:0031227;GO:0031227;GO:0031234;GO:0031234;GO:0031410;GO:0044232;GO:0044232;GO:0071397;GO:0120009;GO:0120020;GO:0140268;GO:0005776;GO:0005783;GO:0005789;GO:0005829;GO:0005829;GO:0005886;GO:0005886;GO:0005886;GO:0006869;GO:0006914;GO:…	-	-	S;D;P	0V4X4;18Y25;12P9A;0UQEH;1CW4M;0DEH3;1AYFK;09TY4;KOG1032	GRAM domain containing 1A [Source:MGI Symbol;Acc:MGI:105490]	52857	Q8VEF1
ENSMUSG00000018899	3662.63	403.25	6922.01	17.1655	4.10144	8.42258e-89	5.63218e-87	11	53660841	53669200	+	3975	Irf1	GO:0000785;GO:0000785;GO:0000976;GO:0000976;GO:0000976;GO:0000976;GO:0000978;GO:0000978;GO:0000978;GO:0000981;GO:0000981;GO:0001228;GO:0001228;GO:0002376;GO:0002376;GO:0002819;GO:0003677;GO:0003677;GO:0003700;GO:0003700;GO:0005515;GO:0005515;GO:0005515;GO:0005515;GO:0005634;GO:0005634;GO:0005634;GO:0005737;GO:0006355;GO:0006357;GO:0006915;GO:0006915;GO:0006915;GO:0006915;GO:0007050;GO:0007050;GO:…	K09444	-	K	1925D;1AX39;13CX1;0IER3;0DIYB;1CTPS;0UM2B;0VF97;0A4EA	interferon regulatory factor 1 [Source:MGI Symbol;Acc:MGI:96590]	16362	P15314;Q5SX13
ENSMUSG00000031584	4124.7	1218.41	7030.99	5.77063	2.52873	1.17704e-88	7.83574e-87	8	34142551	34188191	+	2754	Gsr	GO:0004362;GO:0004362;GO:0004362;GO:0004362;GO:0005737;GO:0005739;GO:0005739;GO:0005739;GO:0005829;GO:0005829;GO:0005829;GO:0006749;GO:0006749;GO:0006749;GO:0007283;GO:0009897;GO:0016491;GO:0016491;GO:0016668;GO:0034599;GO:0042802;GO:0043295;GO:0045454;GO:0045454;GO:0050660;GO:0050660;GO:0050660;GO:0050661;GO:0050661;GO:0055114;GO:0055114;GO:0098869;	K00383	EC:1.8.1.7	O;Q	KOG0405;1B39V;0DMWP;0V7S3;12PHT;18YVN;09WU3;1CWSE;0UR41	glutathione reductase [Source:MGI Symbol;Acc:MGI:95804]	14782	P47791
ENSMUSG00000025969	25777	8522.11	43031.9	5.04944	2.33612	1.27713e-88	8.46423e-87	1	62742444	62857854	+	11842	Nrp2	GO:0001525;GO:0001755;GO:0001764;GO:0003148;GO:0005021;GO:0005515;GO:0005515;GO:0005886;GO:0005886;GO:0007275;GO:0007399;GO:0007411;GO:0007411;GO:0007507;GO:0008201;GO:0016020;GO:0016020;GO:0016021;GO:0017154;GO:0017154;GO:0021612;GO:0021649;GO:0021675;GO:0021828;GO:0030154;GO:0030424;GO:0036486;GO:0038084;GO:0042802;GO:0046872;GO:0048846;GO:0050919;GO:0061549;GO:0061551;GO:0097374;GO:0097490;GO:…	K06819	-	W;T	0UKBY;1CSQH;0IHB5;0V7NM;1AZ3J;13HQ1;18V4I;09WQ4;0DHZV	neuropilin 2 [Source:MGI Symbol;Acc:MGI:1100492]	18187	O35375;Q3U5I8
ENSMUSG00000028064	1037.46	207.463	1867.45	9.00138	3.17015	4.21502e-88	2.77859e-86	3	88343266	88368489	-	5406	Sema4a	GO:0001525;GO:0001755;GO:0002250;GO:0002292;GO:0002376;GO:0005615;GO:0005886;GO:0005887;GO:0007275;GO:0007399;GO:0007409;GO:0007411;GO:0008360;GO:0010594;GO:0016020;GO:0016021;GO:0016525;GO:0030154;GO:0030215;GO:0030215;GO:0030335;GO:0045063;GO:0045499;GO:0048843;GO:0050919;GO:0071526;GO:0071526;GO:1904891;GO:1905704;GO:0007275;GO:0007399;GO:0016020;GO:0016021;GO:0030154;GO:0030215;GO:0001525;GO:…	K06521	-	T	139DI;1CUIX;0DJRT;0UNJ7;09YCD;0V99V;190U2;1AY2G;KOG3611	sema domain, immunoglobulin domain (Ig), transmembrane domain (TM) and short cytoplasmic domain, (semaphorin) 4A [Source:MGI Symbol;Acc:MGI:107560]	20351	Q62178
ENSMUSG00000028412	5894.21	1823.31	9965.11	5.4654	2.45033	4.22975e-88	2.77859e-86	4	53440413	53622478	+	6945	Slc44a1	GO:0016020;GO:0016021;GO:0022857;GO:0055085;GO:0005654;GO:0005739;GO:0005739;GO:0005741;GO:0005829;GO:0005886;GO:0005886;GO:0005886;GO:0015220;GO:0015220;GO:0015220;GO:0015871;GO:0015871;GO:0015871;GO:0016020;GO:0016020;GO:0016021;GO:0016021;GO:0022857;GO:0022857;GO:0055085;GO:0055085;GO:0055085;GO:0055085;GO:0016020;GO:0016021;GO:0022857;GO:0055085;GO:0005654;GO:0005739;GO:0005829;GO:0005886;GO:…	K06515	-	I;P	0DF4J;0V4TJ;18U27;0UIE2;KOG1362;13HK7;09TUA;1B0EA;1CPUE	solute carrier family 44, member 1 [Source:MGI Symbol;Acc:MGI:2140592]	100434	Q6X893
ENSMUSG00000046982	1658.89	266.269	3051.51	11.4602	3.51856	8.28141e-88	5.41634e-86	18	84029752	84105831	-	5848	Tshz1	GO:0000981;GO:0003677;GO:0003677;GO:0003677;GO:0005515;GO:0005634;GO:0005634;GO:0006357;GO:0007275;GO:0009952;GO:0010468;GO:0042474;GO:0046872;GO:0060023;GO:0003677;GO:0003677;GO:0005634;GO:0010468;GO:0046872;	K09236	-	K	18ZPY;0UJW2;1AYSG;1CSCW;13HV8;09WD7;0DHNF;0IJEQ;0V7BM	teashirt zinc finger family member 1 [Source:MGI Symbol;Acc:MGI:1346031]	110796	Q5DTH5
ENSMUSG00000028268	2683.25	16.2848	5350.21	328.54	8.35993	4.0905e-87	2.66365e-85	3	142265787	142278970	+	3265	Gbp3	GO:0003924;GO:0005525;GO:0000139;GO:0000166;GO:0003924;GO:0003924;GO:0003924;GO:0005525;GO:0005525;GO:0005525;GO:0005634;GO:0005634;GO:0005737;GO:0005794;GO:0005794;GO:0005829;GO:0005886;GO:0016020;GO:0016787;GO:0020005;GO:0031410;GO:0031410;GO:0035458;GO:0042803;GO:0042832;GO:0042832;GO:0044406;GO:0048471;GO:0048471;GO:0050830;GO:0050830;GO:0071346;GO:0071346;GO:0003924;GO:0005525;GO:0000139;GO:…	K20899	-	S;O;T;D;C;K	191WI;0V9BC;134KU;09XSJ;1AYRV;KOG2037;1CUKV;0UNNF;0DJTQ	guanylate binding protein 3 [Source:MGI Symbol;Acc:MGI:1926263]	55932	Q61107
ENSMUSG00000032724	268.24	7.98133	528.498	66.2168	6.04912	3.47009e-86	2.24982e-84	2	103396655	103548768	+	6032	Abtb2	GO:0005654;GO:0046982;GO:0097237;	K10521	-	S	0DIVS;09XIB;0UMHV;1B0U1;1CYQE;0IESM;12X6N;0V8GG;18TJ2	ankyrin repeat and BTB (POZ) domain containing 2 [Source:MGI Symbol;Acc:MGI:2139365]	99382	Q7TQI7;Q3T9J9
ENSMUSG00000031488	3860.97	161.525	7560.42	46.8065	5.54864	4.18028e-86	2.69854e-84	8	27628801	27664674	-	10800	Rab11fip1	GO:0005768;GO:0005829;GO:0015031;GO:0016020;GO:0043231;GO:0070164;GO:0005768;GO:0005829;GO:0015031;GO:0016020;GO:0030670;GO:0031267;GO:0031410;GO:0043231;GO:0043231;GO:0045055;GO:0055037;GO:0070164;	K12484	-	S;U	0DGS4;13IMZ;0IGQZ;0VFEU;18UGK;1CRG7;0UFVX;1AU5G;0A3X9	RAB11 family interacting protein 1 (class I) [Source:MGI Symbol;Acc:MGI:1923017]	75767	Q9D620
ENSMUSG00000026288	2914.21	5000.23	828.194	0.165631	-2.59395	5.94652e-86	3.82218e-84	1	87548034	87648229	+	7602	Inpp5d	GO:0002376;GO:0004439;GO:0004445;GO:0005515;GO:0005515;GO:0005515;GO:0005737;GO:0005829;GO:0005829;GO:0005856;GO:0005884;GO:0005886;GO:0005886;GO:0006915;GO:0008340;GO:0009968;GO:0016020;GO:0016064;GO:0016787;GO:0017124;GO:0030487;GO:0030853;GO:0030863;GO:0030889;GO:0032715;GO:0035556;GO:0043065;GO:0045121;GO:0045579;GO:0045621;GO:0045648;GO:0045656;GO:0045659;GO:0045671;GO:0045779;GO:0046856;GO:…	K03084	EC:3.1.3.86	T;U	0DENY;1B10H;1CR6F;1912W;0UKTP;KOG0565;09X1J;12Q93;0V7ZR	inositol polyphosphate-5-phosphatase D [Source:MGI Symbol;Acc:MGI:107357]	16331	Q9ES52
ENSMUSG00000038301	4585.57	1413	7758.14	5.49055	2.45695	9.21966e-86	5.90058e-84	6	51500881	51567659	+	9300	Snx10	GO:0001696;GO:0005545;GO:0005545;GO:0005545;GO:0005634;GO:0005634;GO:0005634;GO:0005737;GO:0005768;GO:0005783;GO:0005783;GO:0005783;GO:0005813;GO:0005813;GO:0005813;GO:0005815;GO:0005856;GO:0006886;GO:0006897;GO:0007032;GO:0007032;GO:0007032;GO:0008289;GO:0010008;GO:0015031;GO:0016020;GO:0030030;GO:0030141;GO:0030316;GO:0031313;GO:0031313;GO:0031313;GO:0035091;GO:0035630;GO:0044691;GO:0045453;GO:…	K17924	-	U	0UN80;192EM;1D181;12PUM;KOG2527;1B3VR;0A4G6;0VFB4;0DHE5	sorting nexin 10 [Source:MGI Symbol;Acc:MGI:1919232]	71982	Q9CWT3;Q4FJX6;Q3UBN7
ENSMUSG00000034343	2180.97	594.367	3767.58	6.3388	2.66421	4.12293e-85	2.6274e-83	1	91178026	91218059	+	8842	Ube2f	GO:0000166;GO:0000209;GO:0005524;GO:0005634;GO:0016740;GO:0018215;GO:0019788;GO:0019788;GO:0045116;GO:0045116;GO:0045116;GO:0061631;GO:0061654;GO:0000166;GO:0000209;GO:0005524;GO:0005634;GO:0016740;GO:0018215;GO:0019788;GO:0019788;GO:0045116;GO:0045116;GO:0045116;GO:0061631;GO:0061654;GO:0000166;GO:0000209;GO:0005524;GO:0005634;GO:0016740;GO:0018215;GO:0019788;GO:0019788;GO:0045116;GO:0045116;GO:…	K10687	EC:2.3.2.34	H;O	0V5I0;1CQHU;0DFUE;1B19A;191H2;KOG0420;12PWW;0UHAF;09UIU	ubiquitin-conjugating enzyme E2F (putative) [Source:MGI Symbol;Acc:MGI:1915171]	67921	Q9CY34
ENSMUSG00000024679	6442.01	2062.72	10821.3	5.24612	2.39125	4.26959e-85	2.70929e-83	19	11563968	11582213	-	1735	Ms4a6d	GO:0016020;GO:0016021;GO:0016021;GO:0016020;GO:0016021;GO:0016021;	K22191	-	S	0UUPF;1D2N7;0DS71;0VGZN;193JN;1B37A;0A64Y;13W8M;0J2FM	membrane-spanning 4-domains, subfamily A, member 6D [Source:MGI Symbol;Acc:MGI:1916024]	68774	Q99N07;Q2TVW7
ENSMUSG00000020841	18195.3	3572.13	32818.4	9.18736	3.19965	6.98368e-85	4.41274e-83	11	76669250	76737844	-	8332	Cpd	GO:0004180;GO:0004181;GO:0004181;GO:0004181;GO:0005615;GO:0005634;GO:0005802;GO:0005886;GO:0006508;GO:0006508;GO:0006518;GO:0006518;GO:0008233;GO:0008237;GO:0008270;GO:0016020;GO:0016021;GO:0016485;GO:0016787;GO:0043231;GO:0044877;GO:0046872;GO:0048471;GO:0051721;	K07752	EC:3.4.17.22	O;T;E;U	1CRJS;12P19;18Y9Q;1ASM2;0UITB;09V9C;0V6KB;KOG2649;0DFQZ	carboxypeptidase D [Source:MGI Symbol;Acc:MGI:107265]	12874	O89001
ENSMUSG00000034248	2445.66	691.493	4199.83	6.07356	2.60254	5.59785e-84	3.52216e-82	14	69479297	69522561	-	6021	Slc25a37	GO:0005381;GO:0005381;GO:0005739;GO:0005739;GO:0005743;GO:0005743;GO:0006811;GO:0016020;GO:0016021;GO:0048250;GO:0048250;GO:0055072;GO:0005381;GO:0005381;GO:0005739;GO:0005739;GO:0005743;GO:0005743;GO:0006811;GO:0016020;GO:0016021;GO:0048250;GO:0048250;GO:0055072;	K15113	-	C	KOG0760;09XA9;12QEP;0V88K;0DI92;1B4WP;1CSZH;0UGX6;18WGD	solute carrier family 25, member 37 [Source:MGI Symbol;Acc:MGI:1914962]	67712	Q920G8;Q9CQG7
ENSMUSG00000075033	250.329	6.41523	494.243	77.0421	6.26758	1.02062e-83	6.39472e-82	16	55660316	55715648	-	6436	Nxpe3	GO:0003674;GO:0005575;GO:0008150;GO:0016020;GO:0016021;	-	-	S	0UMWX;18ZNY;0DER5;0IFPX;1AUXI;0V4D4;12U7P;1CPEY;09TE1	neurexophilin and PC-esterase domain family, member 3 [Source:MGI Symbol;Acc:MGI:2686598]	385658	B9EKK6
ENSMUSG00000020901	16193.5	5605.04	26781.9	4.77819	2.25646	5.35196e-82	3.33927e-80	11	68322947	68388675	+	5550	Pik3r5	GO:0005634;GO:0005737;GO:0005829;GO:0005829;GO:0005829;GO:0005886;GO:0005942;GO:0005942;GO:0005942;GO:0005944;GO:0005944;GO:0007186;GO:0007186;GO:0014065;GO:0016020;GO:0016301;GO:0016310;GO:0031683;GO:0034451;GO:0034451;GO:0043406;GO:0043406;GO:0043551;GO:0043551;GO:0046935;GO:0046935;GO:0046935;GO:0046935;GO:0051897;	K21290	-	T	1CXP9;0UI6K;13JT6;18XEU;0VC07;0A13Y;0DKXE;1AZQY;0IES2	phosphoinositide-3-kinase regulatory subunit 5 [Source:MGI Symbol;Acc:MGI:2443588]	320207	Q5SW28;A1A4T4
ENSMUSG00000030315	596.543	1116.48	76.6063	0.0686141	-3.86535	5.9336e-82	3.68674e-80	6	114837589	114946955	-	5396	Vgll4	GO:0001223;GO:0005515;GO:0005515;GO:0005634;GO:0006355;GO:0030178;GO:0030178;GO:0030308;GO:0030308;GO:0035331;GO:0035331;GO:0045892;GO:0045892;GO:0060044;GO:1903364;GO:0006355;GO:0006355;	-	-	K	0IFGD;0DKYM;1AZNQ;12T7D;0UMXZ;18VFN;0VAD4;09ZG2;1CVTJ	vestigial like family member 4 [Source:MGI Symbol;Acc:MGI:2652840]	232334	Q80V24
ENSMUSG00000036528	3272.04	556.366	5987.71	10.7622	3.4279	6.46561e-82	4.00063e-80	7	107194414	107347790	+	10876	Ppfibp2	GO:0007528;GO:0042802;GO:0042802;GO:0042802;GO:0048786;GO:0050808;GO:0098793;GO:0098793;	-	-	S;T	18V68;0V4E3;1CPFT;1AVZC;0UPZ4;09TF1;0DES3;KOG1899;13H7T	PTPRF interacting protein, binding protein 2 (liprin beta 2) [Source:MGI Symbol;Acc:MGI:894649]	19024	O35711;G3X957
ENSMUSG00000002871	1340.31	2389.81	290.798	0.121682	-3.03881	1.06105e-81	6.53814e-80	6	88879233	88889220	+	4171	Tpra1	GO:0005886;GO:0016020;GO:0016021;GO:0040016;GO:1901991;GO:0005886;GO:0016020;GO:0016021;GO:0040016;GO:1901991;GO:0016020;GO:0016021;GO:0016020;GO:0016021;GO:0005886;GO:0016020;GO:0016021;GO:0040016;GO:1901991;GO:0016020;GO:0016021;GO:0016020;GO:0016021;GO:0016020;GO:0016021;GO:0016020;GO:0016021;	K22988	-	S	0DPZW;13IUE;0VDEY;1B31Y;0URY8;KOG4536;192PA;1CQ1H;09X98	transmembrane protein, adipocyte asscociated 1 [Source:MGI Symbol;Acc:MGI:1345190]	24100	Q99MU1
ENSMUSG00000029798	1230.34	129.473	2331.21	18.0054	4.17035	1.45345e-81	8.91927e-80	6	57557985	57641617	+	9292	Herc6	GO:0002244;GO:0002376;GO:0004842;GO:0005654;GO:0005737;GO:0005737;GO:0005829;GO:0005829;GO:0009617;GO:0016567;GO:0016740;GO:0045087;GO:0061630;	K22372	EC:2.3.2.-	O	0UGQB;KOG0941;0DFEK;0VCYN;1AXTH;1CQ4C;18TG8;12NRN;09ZJH	hect domain and RLD 6 [Source:MGI Symbol;Acc:MGI:1914388]	67138	F2Z461
ENSMUSG00000021725	1093.58	247.863	1939.31	7.8241	2.96792	6.50724e-81	3.97688e-79	13	116991356	117162073	-	8882	Parp8	GO:0003950;GO:0003950;GO:0016740;GO:0016757;GO:0070213;GO:0140289;GO:1990404;GO:0003950;GO:0003950;GO:0006471;GO:0016740;GO:0016757;GO:0070213;GO:0070213;GO:0140289;GO:0140289;GO:1990404;GO:1990404;	K15258	EC:2.4.2.30	S	18TI4;0IE5T;0VB80;1AV6W;0A0BU;0DJS9;13I21;0UJPT;1CUJB	poly (ADP-ribose) polymerase family, member 8 [Source:MGI Symbol;Acc:MGI:1098713]	52552	Q3UD82;F8WIK2
ENSMUSG00000061024	1920.68	397.812	3443.56	8.65624	3.11374	1.8247e-80	1.11061e-78	1	9615633	9617680	+	2048	Rrs1	GO:0000027;GO:0000027;GO:0000055;GO:0000447;GO:0000794;GO:0001650;GO:0002244;GO:0005515;GO:0005634;GO:0005634;GO:0005654;GO:0005730;GO:0005730;GO:0005730;GO:0005783;GO:0007080;GO:0008097;GO:0008097;GO:0030687;GO:0042254;GO:0042254;GO:0042273;GO:0042273;GO:1901796;GO:1901796;GO:1902570;GO:1902570;	K14852	-	J	0DR4K;18Z7X;0VECN;09YBZ;1D09M;1B1JR;KOG1765;13HDT;0URMY	ribosome biogenesis regulator 1 [Source:MGI Symbol;Acc:MGI:1929721]	59014	Q9CYH6
ENSMUSG00000051343	1483.32	2597.2	369.449	0.142249	-2.81351	1.85903e-80	1.1269e-78	6	85311944	85351616	-	6124	Rab11fip5	GO:0000139;GO:0005737;GO:0005739;GO:0005739;GO:0005739;GO:0005741;GO:0005741;GO:0005768;GO:0005769;GO:0005769;GO:0005794;GO:0015031;GO:0016020;GO:0030141;GO:0030141;GO:0030658;GO:0031267;GO:0031410;GO:0031901;GO:0031966;GO:0034451;GO:0035773;GO:0043015;GO:0043015;GO:0043231;GO:0043231;GO:0045055;GO:0045055;GO:0045335;GO:0045335;GO:0055037;GO:0055037;GO:0055038;GO:0070164;GO:0071346;GO:0071468;GO:…	K12484	-	S;U	0VAWF;1CWEJ;1B1XG;0UQS0;18WYP;13IQZ;0IJ70;09ZZP;0DMJA	RAB11 family interacting protein 5 (class I) [Source:MGI Symbol;Acc:MGI:1098586]	52055	Q8R361;Q6ZQ33
ENSMUSG00000030162	216.465	3.39266	429.538	126.608	6.98423	2.07353e-80	1.25184e-78	6	129462207	129484128	-	3572	Olr1	GO:0002376;GO:0005041;GO:0005041;GO:0005576;GO:0005654;GO:0005886;GO:0005886;GO:0005886;GO:0006897;GO:0006954;GO:0006954;GO:0006954;GO:0007155;GO:0007159;GO:0007159;GO:0008219;GO:0008219;GO:0010629;GO:0016020;GO:0016021;GO:0019897;GO:0030246;GO:0042157;GO:0042157;GO:0042802;GO:0043231;GO:0043235;GO:0043235;GO:0045121;GO:0016020;GO:0016021;	K08763	-	T;V	0DNWZ;12TI6;1CXUC;0V9C3;192NW;1B4JU;KOG4297;0A199;0US90	oxidized low density lipoprotein (lectin-like) receptor 1 [Source:MGI Symbol;Acc:MGI:1261434]	108078	Q9EQ09
ENSMUSG00000045817	3834.8	6453.38	1216.23	0.188465	-2.40763	4.27037e-80	2.56773e-78	17	84491359	84495375	-	3530	Zfp36l2	GO:0000165;GO:0000288;GO:0003723;GO:0005634;GO:0005634;GO:0005737;GO:0005737;GO:0006402;GO:0007275;GO:0009611;GO:0009611;GO:0009611;GO:0030097;GO:0030097;GO:0033077;GO:0033077;GO:0035019;GO:0035925;GO:0035925;GO:0035925;GO:0043488;GO:0043488;GO:0043488;GO:0044344;GO:0044344;GO:0044344;GO:0045577;GO:0045599;GO:0046872;GO:0046872;GO:0048103;GO:0060216;GO:0061158;GO:0061158;GO:0061158;GO:0070371;GO:…	K18753	-	S;T	0UQCP;13RRI;0VD43;1B48X;0A287;0DRKE;KOG1677;1D0TP;191UE	zinc finger protein 36, C3H type-like 2 [Source:MGI Symbol;Acc:MGI:107945]	12193	P23949
ENSMUSG00000020263	1150.14	2042.28	257.991	0.126325	-2.98479	8.9229e-80	5.34371e-78	10	83435897	83484602	-	5949	Appl2	GO:0001726;GO:0001786;GO:0001786;GO:0001786;GO:0002024;GO:0005515;GO:0005515;GO:0005634;GO:0005634;GO:0005634;GO:0005737;GO:0005737;GO:0005768;GO:0005768;GO:0005768;GO:0005886;GO:0005886;GO:0005886;GO:0006606;GO:0006606;GO:0006606;GO:0007049;GO:0007179;GO:0007179;GO:0007179;GO:0008283;GO:0009631;GO:0010008;GO:0010008;GO:0010008;GO:0010008;GO:0010762;GO:0016020;GO:0016020;GO:0016020;GO:0023052;GO:…	K20132	-	T	1CPRZ;1AS00;18STI;09TRU;0UG6X;0DF27;0V4R5;KOG0521;12QH7;KOG3536	adaptor protein, phosphotyrosine interaction, PH domain and leucine zipper containing 2 [Source:MGI Symbol;Acc:MGI:2384914]	216190	Q8K3G9;Q3TVI6
ENSMUSG00000059588	2810.89	195.613	5426.16	27.7393	4.79386	2.06099e-79	1.22934e-77	2	84160970	84255755	-	4882	Calcrl	GO:0001525;GO:0001525;GO:0001525;GO:0001605;GO:0001605;GO:0001605;GO:0001635;GO:0001635;GO:0001635;GO:0004888;GO:0004930;GO:0004930;GO:0004948;GO:0005737;GO:0005737;GO:0005764;GO:0005764;GO:0005768;GO:0005768;GO:0005783;GO:0005783;GO:0005886;GO:0005886;GO:0005886;GO:0005886;GO:0006816;GO:0006816;GO:0007165;GO:0007166;GO:0007186;GO:0007186;GO:0007186;GO:0007188;GO:0007189;GO:0007189;GO:0007189;GO:…	K04577	-	T	0UQ2M;0VACF;1CW2Q;KOG4564;1AX1B;0DGT5;18U29;1362D;09TPZ	calcitonin receptor-like [Source:MGI Symbol;Acc:MGI:1926944]	54598	Q9R1W5;A2AR99
ENSMUSG00000024981	3539.4	1121.6	5957.2	5.31132	2.40907	2.32618e-79	1.38199e-77	19	55240370	55286152	+	4864	Acsl5	GO:0016020;GO:0016021;GO:0009758;GO:0016020;GO:0016021;GO:0050053;GO:0000166;GO:0001676;GO:0001676;GO:0001676;GO:0001676;GO:0004467;GO:0004467;GO:0004467;GO:0004467;GO:0005524;GO:0005654;GO:0005654;GO:0005730;GO:0005730;GO:0005739;GO:0005739;GO:0005739;GO:0005739;GO:0005741;GO:0005743;GO:0005783;GO:0005783;GO:0005783;GO:0005783;GO:0005789;GO:0005886;GO:0005886;GO:0005886;GO:0006629;GO:0006631;GO:…	K01897	EC:6.2.1.3	I	1B4QD;0V4XT;1CPJ2;KOG1256;18XUN;0UGR1;0DJJS;12PYZ;09TYX	acyl-CoA synthetase long-chain family member 5 [Source:MGI Symbol;Acc:MGI:1919129]	433256	Q8JZR0;Q3UC67
ENSMUSG00000033581	1655.27	397.993	2912.56	7.3181	2.87147	3.51145e-79	2.07789e-77	16	21877759	21982049	-	7402	Igf2bp2	GO:0003676;GO:0003723;GO:0003723;GO:0003729;GO:0003729;GO:0003730;GO:0003730;GO:0003730;GO:0005634;GO:0005634;GO:0005634;GO:0005737;GO:0005737;GO:0005737;GO:0005829;GO:0005829;GO:0005856;GO:0005856;GO:0006417;GO:0007399;GO:0010468;GO:0048027;GO:0048027;GO:0051028;GO:0051252;GO:0003676;GO:0003723;GO:0003723;GO:0003729;GO:0005634;GO:0051028;	K17392	-	A;K	1B09U;12QIR;0UNKW;0V8ED;1CTJ6;KOG2193;09XGB;0DITV;195UX	insulin-like growth factor 2 mRNA binding protein 2 [Source:MGI Symbol;Acc:MGI:1890358]	319765	Q5SF07
ENSMUSG00000024696	1584.78	2757.45	412.112	0.149454	-2.74222	4.93226e-79	2.90711e-77	19	12773557	12811171	+	1790	Lpxn	GO:0046872;GO:0002102;GO:0002102;GO:0002102;GO:0003712;GO:0003712;GO:0003712;GO:0003712;GO:0005515;GO:0005634;GO:0005634;GO:0005634;GO:0005737;GO:0005737;GO:0005737;GO:0005829;GO:0005829;GO:0005829;GO:0005886;GO:0005886;GO:0005886;GO:0005886;GO:0005925;GO:0005925;GO:0005925;GO:0005925;GO:0006355;GO:0007155;GO:0007162;GO:0007162;GO:0007179;GO:0016020;GO:0016607;GO:0016607;GO:0030054;GO:0033628;GO:…	K24314	-	Z;T;K	0DGSR;0V6HB;KOG1703;12Q3X;1B1GE;18YNX;1CVWQ;09VI1;0UQ4K	leupaxin [Source:MGI Symbol;Acc:MGI:2147677]	107321	Q99N69
ENSMUSG00000043336	3011.22	930.32	5092.12	5.47352	2.45247	6.0983e-79	3.58023e-77	16	57173456	57393489	+	5335	Filip1l	GO:0003674;GO:0005575;GO:0005634;GO:0005737;GO:0008150;GO:0016020;	-	-	S	0IKR8;09TC4;0DEPE;13NQ8;1CPD6;1AS1Q;0V4B9;18YSH;0UG7B	filamin A interacting protein 1-like [Source:MGI Symbol;Acc:MGI:1925999]	78749	E0CYH7
ENSMUSG00000039959	1819.45	3310.61	328.287	0.0991621	-3.33407	8.5268e-79	4.98634e-77	5	135435385	135573974	-	12961	Hip1	GO:0003779;GO:0003779;GO:0005515;GO:0005543;GO:0005634;GO:0005737;GO:0005737;GO:0005737;GO:0005794;GO:0005794;GO:0006897;GO:0006897;GO:0006915;GO:0006915;GO:0006915;GO:0006915;GO:0006919;GO:0006919;GO:0006919;GO:0007015;GO:0012505;GO:0016020;GO:0030136;GO:0030136;GO:0030136;GO:0030136;GO:0030136;GO:0030154;GO:0030276;GO:0030276;GO:0030276;GO:0030276;GO:0030665;GO:0031234;GO:0031234;GO:0031410;GO:…	K04559	-	Z;K	KOG0980;0V94Q;18ZSA;1CUDE;0UU01;09Y76;0DHKB;130S5;1AS9S	huntingtin interacting protein 1 [Source:MGI Symbol;Acc:MGI:1099804]	215114	Q8VD75
ENSMUSG00000040264	181.997	0.383815	363.611	947.36	9.88777	4.30986e-78	2.51049e-76	3	142300608	142324940	+	2823	Gbp2b	GO:0003924;GO:0005525;GO:0005794;	K20897	-	S;O;T;D;C;K	1AVYD;0UI2K;0V9BC;134KU;09XSJ;KOG2037;1CUKV;0DJTQ;194H1	guanylate binding protein 2b [Source:MGI Symbol;Acc:MGI:95666]	14468	A4UUI2
ENSMUSG00000037697	1826.99	516.908	3137.07	6.06892	2.60144	5.06256e-78	2.93747e-76	14	45825924	45895600	-	14076	Ddhd1	GO:0046872;GO:0046872;GO:0090141;GO:0046872;GO:0046872;	K13619	EC:3.1.1.-	I;U	12QAH;0DMNP;KOG2308;0UNJF;0V4H8;1B2UU;18ZU6;1CWI5;09TIA	DDHD domain containing 1 [Source:MGI Symbol;Acc:MGI:2150302]	114874	Q80YA3
ENSMUSG00000090272	1272.51	179.42	2365.6	13.1847	3.72079	8.74648e-78	5.05533e-76	1	173676692	173708447	-	3591	Mndal	GO:0002218;GO:0035458;GO:0000122;GO:0000978;GO:0001227;GO:0002218;GO:0002218;GO:0003674;GO:0003690;GO:0003690;GO:0005634;GO:0005634;GO:0005654;GO:0005730;GO:0005730;GO:0005829;GO:0008134;GO:0009617;GO:0030308;GO:0032731;GO:0035458;GO:0035458;GO:0040008;GO:0042802;GO:0002218;GO:0035458;GO:0002218;GO:0035458;	-	-	-	-	myeloid nuclear differentiation antigen like [Source:MGI Symbol;Acc:MGI:3780953]	100040462	D0QMC3
ENSMUSG00000071637	1531.28	186.816	2875.75	15.3935	3.94425	1.16129e-77	6.68618e-76	16	15705150	15708895	+	3746	Cebpd	GO:0000785;GO:0000976;GO:0000978;GO:0000978;GO:0000978;GO:0000978;GO:0000981;GO:0001228;GO:0001228;GO:0001228;GO:0002244;GO:0003677;GO:0003677;GO:0003700;GO:0005515;GO:0005515;GO:0005634;GO:0005634;GO:0005634;GO:0005654;GO:0005654;GO:0006355;GO:0006357;GO:0006357;GO:0042802;GO:0043565;GO:0043565;GO:0045444;GO:0045595;GO:0045669;GO:0045892;GO:0045944;GO:0045944;GO:0045944;GO:0048839;GO:1990837;	K10050	-	-	-	CCAAT/enhancer binding protein (C/EBP), delta [Source:MGI Symbol;Acc:MGI:103573]	12609	Q00322;B9EIA9;Q3UE64
ENSMUSG00000035385	298.034	18.4027	577.666	31.3903	4.97225	1.2334e-77	7.07403e-76	11	81926397	81928279	+	1138	Ccl2	GO:0001525;GO:0001664;GO:0001666;GO:0001912;GO:0001912;GO:0001938;GO:0001938;GO:0002523;GO:0002523;GO:0002544;GO:0002548;GO:0002687;GO:0002687;GO:0002693;GO:0002693;GO:0005125;GO:0005125;GO:0005515;GO:0005515;GO:0005576;GO:0005576;GO:0005615;GO:0005615;GO:0005615;GO:0005615;GO:0005615;GO:0005737;GO:0005737;GO:0005791;GO:0005791;GO:0006874;GO:0006874;GO:0006935;GO:0006954;GO:0006954;GO:0006954;GO:…	K14624	-	W	0A9MF;0J1ST;0VKCZ;13VZX;1D54A;0DVIR;0UW9M;1B6T0;1942X	chemokine (C-C motif) ligand 2 [Source:MGI Symbol;Acc:MGI:98259]	20296	P10148;Q5SVU3
ENSMUSG00000021930	1823.04	518.227	3127.85	6.03568	2.59352	1.85069e-77	1.05738e-75	14	61769442	61794335	-	4002	Spryd7	GO:0003674;GO:0005575;GO:0008150;GO:0016020;GO:0016021;	-	-	S	1CWV5;0A2DC;0VD8Z;192RP;13NA9;KOG4030;1AZUK;0UQ46;0DQ0P	SPRY domain containing 7 [Source:MGI Symbol;Acc:MGI:1913924]	66674	Q3TFQ1
ENSMUSG00000039191	1143.86	277.133	2010.58	7.25493	2.85896	2.58153e-77	1.4693e-75	5	53623494	53814704	+	12750	Rbpj	GO:0001228;GO:0003677;GO:0003700;GO:0005634;GO:0006355;GO:0006357;GO:0045944;GO:0000978;GO:0001228;GO:0003677;GO:0003677;GO:0003700;GO:0005634;GO:0005634;GO:0006355;GO:0006357;GO:0045944;GO:0000122;GO:0000122;GO:0000122;GO:0000785;GO:0000978;GO:0000978;GO:0000978;GO:0000978;GO:0000981;GO:0001103;GO:0001103;GO:0001228;GO:0001228;GO:0001228;GO:0001228;GO:0001525;GO:0001756;GO:0001756;GO:0001837;GO:…	K06053	-	K	KOG3743;1ASFM;12T7Q;0V54V;1CQ58;09U5V;0UFH9;0DFFF;18TBJ	recombination signal binding protein for immunoglobulin kappa J region [Source:MGI Symbol;Acc:MGI:96522]	19664	P31266
ENSMUSG00000026626	3585.61	1160.97	6010.26	5.17692	2.37209	2.70259e-77	1.53236e-75	1	191084172	191135469	-	9607	Ppp2r5a	GO:0000159;GO:0000159;GO:0000159;GO:0000159;GO:0000775;GO:0004721;GO:0004721;GO:0005515;GO:0005634;GO:0005634;GO:0005694;GO:0005737;GO:0005737;GO:0005737;GO:0005813;GO:0005813;GO:0005829;GO:0005829;GO:0005829;GO:0005829;GO:0006470;GO:0006470;GO:0006470;GO:0007165;GO:0016020;GO:0016020;GO:0019888;GO:0019900;GO:0019900;GO:0030018;GO:0030018;GO:0031430;GO:0031430;GO:0031952;GO:0035307;GO:0035307;GO:…	K11584	-	T	194T9;KOG2085;0A17T;0DNVK;12N9U;0USZ8;1AYUY;0V6ZH;1CXT3	protein phosphatase 2, regulatory subunit B', alpha [Source:MGI Symbol;Acc:MGI:2388479]	226849	Q6PD03
ENSMUSG00000025245	1488.69	166.251	2811.13	16.909	4.07972	3.20467e-77	1.81016e-75	9	123523481	123546762	-	11152	Lztfl1	GO:0005737;GO:0005737;GO:0005737;GO:0005515;GO:0005515;GO:0005737;GO:0005737;GO:0005829;GO:0005829;GO:0042802;GO:0042802;GO:0044877;GO:0044877;GO:0044877;GO:1903565;GO:1903565;GO:1903565;GO:1903568;GO:1903568;GO:0005737;GO:0005737;	K19400	-	K	0DNA2;0VBIU;0UG7H;12SZV;1CX6V;0A0NR;1B1IN;0IGWZ;18X79	leucine zipper transcription factor-like 1 [Source:MGI Symbol;Acc:MGI:1934860]	93730	Q9JHQ5
ENSMUSG00000023106	1772.22	501.148	3043.28	6.07263	2.60232	5.14659e-77	2.89607e-75	5	124045238	124066898	+	6094	Denr	GO:0001731;GO:0001731;GO:0001731;GO:0002188;GO:0003729;GO:0003743;GO:0003743;GO:0006412;GO:0006413;GO:0006413;GO:0032790;GO:0032790;GO:0075522;GO:0075522;GO:0003743;GO:0003743;GO:0006412;GO:0006413;GO:0006413;	K24272	-	J	09U3U;0UPXY;KOG3239;0V52Y;18RZY;1B4F0;13QMC;0DFDI;1CQ3A	density-regulated protein [Source:MGI Symbol;Acc:MGI:1915434]	68184	Q9CQJ6
ENSMUSG00000039852	1504.45	2613.83	395.072	0.151147	-2.72598	9.77706e-77	5.48103e-75	4	150366103	150706423	+	8528	Rere	GO:0000118;GO:0001085;GO:0003682;GO:0003713;GO:0003714;GO:0003714;GO:0005515;GO:0005634;GO:0005634;GO:0005634;GO:0005634;GO:0006338;GO:0006355;GO:0007275;GO:0008270;GO:0016605;GO:0021549;GO:0021691;GO:0021930;GO:0021942;GO:0043565;GO:0045892;GO:0045893;GO:0046872;GO:0048755;GO:0048813;GO:0003682;GO:0005634;GO:0006355;GO:0008270;GO:0043565;GO:0005634;GO:0005634;	K05628	-	K	KOG2133;136GN;18SFS;0V4FW;09TGX;0UFV1;1CPHF;1ARPX;0DETP	arginine glutamic acid dipeptide (RE) repeats [Source:MGI Symbol;Acc:MGI:2683486]	68703	Q80TZ9
ENSMUSG00000027366	6508.29	2255.91	10760.7	4.77	2.25399	1.11725e-76	6.23988e-75	2	126732311	126775155	-	8665	Sppl2a	GO:0004190;GO:0005764;GO:0005765;GO:0005765;GO:0005765;GO:0005768;GO:0005770;GO:0005770;GO:0005886;GO:0005886;GO:0006508;GO:0006509;GO:0006509;GO:0006509;GO:0008233;GO:0016020;GO:0016020;GO:0016020;GO:0016021;GO:0016021;GO:0016787;GO:0030660;GO:0030660;GO:0030660;GO:0030660;GO:0031293;GO:0031293;GO:0031293;GO:0031902;GO:0031902;GO:0033619;GO:0033619;GO:0033619;GO:0033619;GO:0042500;GO:0042500;GO:…	K09596	EC:3.4.23.-	T;U	09WK4;1916M;KOG2442;13HVS;0UQA2;1CSK2;0V7IQ;0DHVG;1B0P3	signal peptide peptidase like 2A [Source:MGI Symbol;Acc:MGI:1913802]	66552	Q9JJF9
ENSMUSG00000047798	1263.3	2216.61	309.988	0.139848	-2.83807	1.25717e-76	6.99514e-75	11	115007040	115024818	-	5149	Cd300lf	GO:0001618;GO:0001786;GO:0002376;GO:0004888;GO:0005136;GO:0005515;GO:0005886;GO:0005886;GO:0008289;GO:0016020;GO:0016021;GO:0030316;GO:0033004;GO:0033004;GO:0034125;GO:0034125;GO:0035666;GO:0035666;GO:0035772;GO:0046718;GO:0097001;GO:0097001;GO:1902216;GO:2000426;GO:2000427;GO:0001618;GO:0001786;GO:0002376;GO:0004888;GO:0005136;GO:0005515;GO:0005886;GO:0005886;GO:0008289;GO:0016020;GO:0016021;GO:…	K20395	-	S;W;T	1AU12;0DJVP;0IZ4I;09YFG;0UNQN;19629;13T9V;1CUNY;0V9DA	CD300 molecule like family member F [Source:MGI Symbol;Acc:MGI:2442359]	246746	Q6SJQ7;A0A1C9ZQ14
ENSMUSG00000039217	479.058	66.0027	892.113	13.5163	3.75663	7.27233e-76	4.03141e-74	9	50466127	50493140	+	1031	Il18	GO:0000165;GO:0000165;GO:0001525;GO:0001525;GO:0001525;GO:0001666;GO:0005125;GO:0005125;GO:0005125;GO:0005125;GO:0005125;GO:0005576;GO:0005615;GO:0005615;GO:0005615;GO:0005615;GO:0005737;GO:0005737;GO:0006954;GO:0006954;GO:0006954;GO:0006954;GO:0006955;GO:0006955;GO:0008283;GO:0008625;GO:0010628;GO:0010744;GO:0014068;GO:0014068;GO:0014911;GO:0016324;GO:0030101;GO:0030155;GO:0030155;GO:0030155;GO:…	K05482	-	T	1D280;13WDN;0VGFJ;1B0CH;0A5KI;0DSWY;0UQM1;193C9;0J3U9	interleukin 18 [Source:MGI Symbol;Acc:MGI:107936]	16173	P70380;Q2PMY2
ENSMUSG00000024966	2726.55	859.875	4593.23	5.34174	2.41731	8.29879e-76	4.58339e-74	19	6998070	7017335	-	2108	Stip1	GO:0005515;GO:0005634;GO:0005737;GO:0005829;GO:0008022;GO:0008022;GO:0030544;GO:0030544;GO:0032991;GO:0032991;GO:0032991;GO:0043209;GO:0051087;GO:0051087;GO:0051879;GO:0051879;GO:0051879;GO:0098761;GO:0101031;GO:0101031;	K09553	-	O	12N8B;1917T;1CY0H;KOG0548;0DP2J;09V7J;0V674;1AW9D;0URK7	stress-induced phosphoprotein 1 [Source:MGI Symbol;Acc:MGI:109130]	20867	Q60864
ENSMUSG00000063193	4773.22	7920.33	1626.11	0.205309	-2.28413	1.51833e-75	8.35475e-74	11	114813607	114825212	-	2917	Cd300lb	GO:0016020;GO:0016021;GO:0002376;GO:0002446;GO:0004888;GO:0005515;GO:0005886;GO:0005886;GO:0016020;GO:0016021;GO:0033005;GO:0071222;GO:0016020;GO:0016021;	K20395	-	-	-	CD300 molecule like family member B [Source:MGI Symbol;Acc:MGI:2685099]	217304	Q3U497;Q3TEQ8;A0A0R3P9D2
ENSMUSG00000037295	2128.16	3621.43	634.886	0.175314	-2.51199	5.70767e-75	3.12915e-73	4	134468865	134495335	-	7010	Ldlrap1	GO:0001540;GO:0001540;GO:0001540;GO:0001784;GO:0001784;GO:0001784;GO:0005102;GO:0005515;GO:0005515;GO:0005546;GO:0005546;GO:0005737;GO:0005737;GO:0005769;GO:0005769;GO:0005769;GO:0005829;GO:0005829;GO:0005829;GO:0005883;GO:0006629;GO:0006897;GO:0006898;GO:0006898;GO:0008202;GO:0008203;GO:0009898;GO:0009898;GO:0009925;GO:0009925;GO:0009925;GO:0030159;GO:0030159;GO:0030276;GO:0030276;GO:0030276;GO:…	K12474	-	T	09YQM;1AU8E;0UIR5;0V9NG;131AV;0DK53;1CUYX;191QK;KOG3536	low density lipoprotein receptor adaptor protein 1 [Source:MGI Symbol;Acc:MGI:2140175]	100017	Q8C142
ENSMUSG00000041773	721.663	1313.38	129.948	0.0989421	-3.33727	5.80855e-75	3.17279e-73	13	97377613	97389542	+	4737	Enc1	GO:0000785;GO:0003779;GO:0003779;GO:0005634;GO:0005634;GO:0005634;GO:0005654;GO:0005654;GO:0005730;GO:0005730;GO:0005737;GO:0005737;GO:0005737;GO:0005737;GO:0005856;GO:0007275;GO:0007399;GO:0010499;GO:0010499;GO:0010499;GO:0010499;GO:0010976;GO:0010976;GO:0016363;GO:0016363;GO:0016363;GO:0016567;GO:0016567;GO:0016567;GO:0017148;GO:0017148;GO:0017148;GO:0031463;GO:0031463;GO:0031463;GO:0031463;GO:…	K10462	-	T	09VH1;0DGRS;12PAX;1CRFT;1ATV8;18UVR;0V6GA;0UNVR;KOG4441	ectodermal-neural cortex 1 [Source:MGI Symbol;Acc:MGI:109610]	13803	O35709
ENSMUSG00000072620	14702.5	2424.32	26980.6	11.1292	3.47627	6.52935e-75	3.55349e-73	11	82955938	82961504	+	1664	Slfn2	GO:0008285;GO:0009617;	K24457	-	S	1D111;1423J;19473;0A069;1B7CR;0VDXK;0JAUV;0DRSW;0UUIB	schlafen 2 [Source:MGI Symbol;Acc:MGI:1313258]	20556	Q9Z0I6
ENSMUSG00000005043	535.083	997.405	72.7605	0.0729498	-3.77695	1.90207e-74	1.03141e-72	11	119234251	119246362	-	4414	Sgsh	GO:0005515;GO:0005539;GO:0005764;GO:0006027;GO:0006027;GO:0008449;GO:0008484;GO:0016250;GO:0016250;GO:0030200;GO:0030200;GO:0030201;GO:0003824;GO:0005515;GO:0005539;GO:0005764;GO:0005764;GO:0006027;GO:0006027;GO:0006027;GO:0008449;GO:0008484;GO:0008484;GO:0016250;GO:0016250;GO:0016250;GO:0016787;GO:0030200;GO:0030200;GO:0030200;GO:0030201;GO:0003824;GO:0005515;GO:0005539;GO:0005764;GO:0006027;GO:…	K01565	EC:3.10.1.1	G	1AXMW;0DKQB;0VA5I;18YKU;0UTAF;1CVIW;09Z87;KOG3867;12RSM	N-sulfoglucosamine sulfohydrolase (sulfamidase) [Source:MGI Symbol;Acc:MGI:1350341]	27029	Q9EQ08;Q3URR4
ENSMUSG00000027555	1707.86	494.064	2921.65	5.91351	2.56401	2.17072e-74	1.17282e-72	3	14706787	14728062	+	2299	Car13	GO:0004089;GO:0004089;GO:0004089;GO:0004089;GO:0005737;GO:0005829;GO:0005829;GO:0006730;GO:0008270;GO:0016829;GO:0016836;GO:0043209;GO:0043231;GO:0046872;	K01672	EC:4.2.1.1	P	1CV4N;13HPY;18UQ4;0VC0Y;KOG0382;0UGEK;0A14P;0DNSM;1B4H3	carbonic anhydrase 13 [Source:MGI Symbol;Acc:MGI:1931322]	71934	Q9D6N1
ENSMUSG00000025017	19555.1	7268.29	31841.8	4.38093	2.13124	2.67515e-74	1.44014e-72	19	41260816	41373541	-	5572	Pik3ap1	GO:0005102;GO:0005515;GO:0005515;GO:0005737;GO:0005737;GO:0005829;GO:0005829;GO:0005886;GO:0005886;GO:0014068;GO:0016020;GO:0034122;GO:0034134;GO:0034142;GO:0034154;GO:0034162;GO:0036312;GO:0036312;GO:0042802;GO:0050727;	K12230	-	T	18UX6;13KN1;0UHCY;09UKF;1CQJH;0IKKC;0DFW6;1AU9M;0V5JU	phosphoinositide-3-kinase adaptor protein 1 [Source:MGI Symbol;Acc:MGI:1933177]	83490	Q9EQ32
ENSMUSG00000044674	2341.71	324.126	4359.3	13.4494	3.74947	6.03965e-74	3.23969e-72	5	4803839	4808035	-	4197	Fzd1	GO:0001934;GO:0003149;GO:0003150;GO:0003151;GO:0004888;GO:0004930;GO:0005102;GO:0005109;GO:0005886;GO:0005886;GO:0005886;GO:0007165;GO:0007166;GO:0007186;GO:0007267;GO:0007275;GO:0009986;GO:0010976;GO:0016020;GO:0016020;GO:0016021;GO:0016021;GO:0016021;GO:0016055;GO:0016055;GO:0016055;GO:0017147;GO:0017147;GO:0030165;GO:0030514;GO:0030855;GO:0035425;GO:0036520;GO:0042493;GO:0042802;GO:0042803;GO:…	K02432	-	T	1CYYR;0V4SV;18XNF;0URE0;12NRT;0DN6E;1B3F3;KOG3577;09TTI	frizzled class receptor 1 [Source:MGI Symbol;Acc:MGI:1196625]	14362	O70421
ENSMUSG00000043157	1431.79	2480.36	383.221	0.154502	-2.6943	6.79903e-74	3.63395e-72	14	61547202	61549385	+	2184	Arl11	GO:0000166;GO:0002244;GO:0005525;GO:0005525;GO:0005525;GO:0005886;GO:0006886;GO:0016192;GO:0000166;GO:0002244;GO:0005525;GO:0005525;GO:0005525;GO:0005886;GO:0006886;GO:0016192;	K07959	-	U	0UPWF;1CW3V;0DM8P;1ATRG;KOG0070;0VAM9;09XKW;195YG;13QQ3	ADP-ribosylation factor-like 11 [Source:MGI Symbol;Acc:MGI:2444054]	219144	Q6P3A9
ENSMUSG00000027878	7777.3	2559.75	12994.9	5.0766	2.34386	8.99959e-74	4.79292e-72	3	97920843	98057677	+	10782	Notch2	GO:0000122;GO:0001501;GO:0001701;GO:0001709;GO:0001709;GO:0001889;GO:0001890;GO:0001947;GO:0002011;GO:0002315;GO:0002437;GO:0003184;GO:0003184;GO:0005509;GO:0005515;GO:0005515;GO:0005576;GO:0005634;GO:0005634;GO:0005634;GO:0005654;GO:0005654;GO:0005654;GO:0005737;GO:0005829;GO:0005886;GO:0005886;GO:0005886;GO:0005886;GO:0005887;GO:0005887;GO:0005887;GO:0005929;GO:0006355;GO:0006357;GO:0006959;GO:…	K20994	-	T;K	1BB5A;197AA;0B4ZZ;0WHJN;0E8ME;1DFJ6;0V3C0;0IR7G;13DX8	notch 2 [Source:MGI Symbol;Acc:MGI:97364]	18129	O35516
ENSMUSG00000024663	1426.97	2558.93	295.01	0.115286	-3.11671	4.69579e-73	2.49194e-71	19	9979033	10015744	+	7161	Rab3il1	GO:0005085;GO:0005085;GO:0005085;GO:0005085;GO:0006887;GO:0015031;GO:0019900;GO:0042802;GO:0050790;GO:0070319;GO:0005085;GO:0050790;GO:0005085;GO:0050790;GO:0005085;GO:0005085;GO:0005085;GO:0005085;GO:0006887;GO:0015031;GO:0019900;GO:0042802;GO:0050790;GO:0070319;GO:0005085;GO:0050790;GO:0005085;GO:0050790;GO:0005085;GO:0005085;GO:0005085;GO:0005085;GO:0006887;GO:0015031;GO:0019900;GO:0042802;GO:…	K16779	-	U	09WND;KOG4324;18SEM;1AU8G;0DHXZ;12R8Z;1CSNJ;0V7KY;0UKZT	RAB3A interacting protein (rabin3)-like 1 [Source:MGI Symbol;Acc:MGI:1922010]	74760	Q8VDV3
ENSMUSG00000042129	28644.4	3782	53506.9	14.1478	3.8225	5.56705e-73	2.94382e-71	6	116609969	116650913	-	9209	Rassf4	GO:0003674;GO:0005575;GO:0007049;GO:0007165;GO:0007165;GO:0003674;GO:0005575;GO:0007049;GO:0007165;GO:0007165;	K09851	-	T	196YI;13MS5;0B19H;KOG4239;1BAEP;0WDUP;0V1SW;1DDHB;0E6IW	Ras association (RalGDS/AF-6) domain family member 4 [Source:MGI Symbol;Acc:MGI:2386853]	213391	Q8CB96
ENSMUSG00000004099	1539.39	2677.45	401.326	0.149891	-2.73801	6.26847e-73	3.30302e-71	9	20818505	20871184	-	7377	Dnmt1	GO:0003677;GO:0003677;GO:0003682;GO:0003682;GO:0003886;GO:0003886;GO:0005634;GO:0005634;GO:0008168;GO:0008168;GO:0008270;GO:0016740;GO:0032259;GO:0046872;GO:0090116;GO:0000122;GO:0000792;GO:0003677;GO:0003677;GO:0003677;GO:0003682;GO:0003682;GO:0003723;GO:0003824;GO:0003886;GO:0003886;GO:0003886;GO:0005515;GO:0005515;GO:0005515;GO:0005634;GO:0005634;GO:0005634;GO:0005634;GO:0005654;GO:0005657;GO:…	K00558	EC:2.1.1.37	K;B	12RZZ;0UQ1T;0V6G0;0DGRF;1CRFF;09VGR;18UKG;0IF68;1AUWR	DNA methyltransferase (cytosine-5) 1 [Source:MGI Symbol;Acc:MGI:94912]	13433	P13864;Q3UHZ3
ENSMUSG00000003206	902.808	158.557	1647.06	10.3878	3.37682	1.31256e-72	6.89184e-71	17	56259640	56264022	+	1154	Ebi3	GO:0004896;GO:0004896;GO:0004896;GO:0005125;GO:0005515;GO:0005515;GO:0005576;GO:0005615;GO:0009897;GO:0016020;GO:0017046;GO:0019221;GO:0019221;GO:0019955;GO:0033210;GO:0042098;GO:0043235;GO:0045523;	K24476	-	W	1CWMR;0UQZQ;0A060;0VB23;13S8D;192TT;1B59Y;0DMS3;0IX61	Epstein-Barr virus induced gene 3 [Source:MGI Symbol;Acc:MGI:1354171]	50498	O35228;Q3U1K3
ENSMUSG00000042228	7644.8	2779.99	12509.6	4.49988	2.16989	1.85911e-72	9.7274e-71	4	3678115	3813122	+	4073	Lyn	GO:0000166;GO:0001782;GO:0001817;GO:0001933;GO:0001934;GO:0001934;GO:0002250;GO:0002376;GO:0002431;GO:0002431;GO:0002513;GO:0002513;GO:0002553;GO:0002553;GO:0002576;GO:0002576;GO:0002762;GO:0002768;GO:0002774;GO:0002902;GO:0002902;GO:0004672;GO:0004672;GO:0004713;GO:0004713;GO:0004713;GO:0004713;GO:0004713;GO:0004713;GO:0004715;GO:0004715;GO:0005102;GO:0005102;GO:0005102;GO:0005128;GO:0005161;GO:…	K05854	EC:2.7.10.2	T	0UNKM;195ZK;KOG0197;0DJSM;1AWSY;09YCT;12R3M;1CUJR;0V5FJ	LYN proto-oncogene, Src family tyrosine kinase [Source:MGI Symbol;Acc:MGI:96892]	17096	P25911;Q3TCS3;Q8CEI0
ENSMUSG00000024529	1193.35	196.357	2190.35	11.1549	3.47961	3.37507e-72	1.75975e-70	18	52649139	52662939	-	4778	Lox	GO:0001568;GO:0001649;GO:0001932;GO:0004720;GO:0004720;GO:0004720;GO:0004720;GO:0004720;GO:0005507;GO:0005507;GO:0005507;GO:0005507;GO:0005515;GO:0005515;GO:0005518;GO:0005518;GO:0005518;GO:0005576;GO:0005581;GO:0005615;GO:0005615;GO:0005615;GO:0005615;GO:0005615;GO:0005634;GO:0005634;GO:0007507;GO:0009725;GO:0009725;GO:0010468;GO:0016202;GO:0016491;GO:0016641;GO:0017015;GO:0018057;GO:0018057;GO:…	K00277	EC:1.4.3.13	O;W	0DKQN;0VA5U;1CVJ5;13KN2;0IHTH;195CU;0UJBD;09Z8H;1AUUF	lysyl oxidase [Source:MGI Symbol;Acc:MGI:96817]	16948	P28301;Q3TXH3;Q3TP83
ENSMUSG00000027347	637.86	3.80731	1271.91	334.071	8.38401	3.62762e-72	1.88485e-70	2	117110474	117173482	-	5600	Rasgrp1	GO:0000139;GO:0001934;GO:0002437;GO:0005085;GO:0005085;GO:0005085;GO:0005509;GO:0005509;GO:0005737;GO:0005783;GO:0005789;GO:0005794;GO:0005794;GO:0005829;GO:0005829;GO:0005829;GO:0005829;GO:0005886;GO:0005886;GO:0005886;GO:0005886;GO:0007264;GO:0008270;GO:0014066;GO:0016020;GO:0019992;GO:0030101;GO:0030154;GO:0031210;GO:0032252;GO:0032725;GO:0032729;GO:0032760;GO:0032816;GO:0032825;GO:0033089;GO:…	K04350	-	T	0IQ6J;0B4GF;1977D;0E8B2;1DF9Q;13D3G;1BB0G;0V35R;0WGZJ	RAS guanyl releasing protein 1 [Source:MGI Symbol;Acc:MGI:1314635]	19419	Q9Z1S3
ENSMUSG00000000204	213.894	6.56943	421.219	64.118	6.00266	1.01341e-71	5.24723e-70	11	83066012	83081042	+	3964	Slfn4	GO:0003674;GO:0005575;GO:0009617;GO:0003674;GO:0005575;GO:0009617;GO:0003674;GO:0005575;GO:0009617;	K24457	-	S	1D111;1423J;1963I;0A069;0VDXK;0JAUV;0DRSW;0UUIB;1B4R5	schlafen 4 [Source:MGI Symbol;Acc:MGI:1329010]	20558	Q3UV66;Q3UV10
ENSMUSG00000032261	4026.73	1399.5	6653.95	4.75451	2.2493	1.04297e-71	5.38159e-70	9	83430380	83520854	+	7865	Sh3bgrl2	GO:0005654;GO:0031965;GO:0005515;GO:0005634;GO:0005654;GO:0008150;GO:0017124;GO:0031965;	K23740	-	O	KOG4023;193PZ;0UVF4;13U5R;1B63B;1D3R6;0VIFK;0DUDJ;0A7IZ	SH3 domain binding glutamic acid-rich protein like 2 [Source:MGI Symbol;Acc:MGI:1915350]	212531	Q8BG73
ENSMUSG00000031897	1473.21	423.881	2522.54	5.95106	2.57315	3.53752e-71	1.81902e-69	8	106662367	106665076	-	1705	Psmb10	GO:0000502;GO:0000902;GO:0002376;GO:0004175;GO:0004175;GO:0004298;GO:0004298;GO:0005634;GO:0005634;GO:0005654;GO:0005737;GO:0005737;GO:0005829;GO:0005839;GO:0005839;GO:0005839;GO:0005839;GO:0006508;GO:0008233;GO:0010499;GO:0016787;GO:0019774;GO:0042098;GO:0043161;GO:0051603;GO:1990111;	K02733	EC:3.4.25.1	O	1B4QV;KOG0173;09UF2;18UXV;12SP3;0DFQT;0UNHW;0V5EB;1CQEF	proteasome (prosome, macropain) subunit, beta type 10 [Source:MGI Symbol;Acc:MGI:1096380]	19171	O35955
ENSMUSG00000039031	552.175	1020.02	84.3305	0.0826754	-3.5964	3.68533e-71	1.88851e-69	10	26629417	26794644	+	6602	Arhgap18	GO:0001726;GO:0001726;GO:0005096;GO:0005096;GO:0005096;GO:0005096;GO:0005737;GO:0005737;GO:0005737;GO:0005737;GO:0005829;GO:0005829;GO:0005881;GO:0005881;GO:0005886;GO:0005886;GO:0007165;GO:0007264;GO:0007264;GO:0008360;GO:0008360;GO:0016607;GO:0016607;GO:0030833;GO:0030833;GO:0030833;GO:0032956;GO:0032956;GO:0043547;GO:0051056;GO:0051056;GO:0051056;GO:2000145;GO:2000145;	K20639	-	T	KOG2200;0DG4N;0UJCT;0V5UR;12NYV;1CQU7;09UV5;18Y96;1B13Z	Rho GTPase activating protein 18 [Source:MGI Symbol;Acc:MGI:1921160]	73910	Q8K0Q5
ENSMUSG00000046031	269.501	17.7755	521.227	29.3228	4.87395	6.38718e-71	3.26184e-69	10	34002063	34003980	-	1094	Calhm6	GO:0005261;GO:0005887;GO:0006811;GO:0016020;GO:0016021;GO:0034220;GO:0098655;	-	-	P;U	0DF19;18SCW;1ARMF;0IGW7;0UG5K;0VEI7;13JMB;0A1EK;1CPEQ	calcium homeostasis modulator family member 6 [Source:MGI Symbol;Acc:MGI:2443082]	215900	Q8C9E8
ENSMUSG00000028214	215.34	7.15202	423.528	59.2179	5.88796	8.73751e-71	4.44689e-69	4	11704457	11714752	+	2104	Gem	GO:0000166;GO:0000278;GO:0000278;GO:0000287;GO:0000287;GO:0003924;GO:0003924;GO:0003924;GO:0003924;GO:0005246;GO:0005515;GO:0005525;GO:0005525;GO:0005525;GO:0005525;GO:0005525;GO:0005634;GO:0005886;GO:0005886;GO:0007165;GO:0009898;GO:0009898;GO:0016020;GO:0016020;GO:0019003;GO:0019003;GO:0030496;GO:0030496;GO:0051233;GO:0051233;GO:0051276;GO:0051276;GO:0051310;GO:0051310;GO:0072686;GO:0072686;GO:…	K07846	-	S;J	0V6AT;0UJ7H;1B2QB;09VBH;192GX;12RPT;KOG0395;1CR9U;0DGJZ	GTP binding protein (gene overexpressed in skeletal muscle) [Source:MGI Symbol;Acc:MGI:99844]	14579	P55041;Q3TH76
ENSMUSG00000020671	6161.9	2247.99	10075.8	4.48215	2.16419	9.2442e-71	4.68876e-69	12	3297428	3359969	-	3513	Rab10	GO:0000145;GO:0000166;GO:0003924;GO:0003924;GO:0005515;GO:0005515;GO:0005515;GO:0005525;GO:0005525;GO:0005525;GO:0005737;GO:0005768;GO:0005768;GO:0005768;GO:0005783;GO:0005789;GO:0005789;GO:0005794;GO:0005794;GO:0005794;GO:0005802;GO:0005802;GO:0005856;GO:0005886;GO:0005886;GO:0005886;GO:0005929;GO:0005929;GO:0006886;GO:0006893;GO:0006893;GO:0006904;GO:0007409;GO:0007409;GO:0008021;GO:0009306;GO:…	K07903	-	U	0DJYH;09YQS;1CW0X;191AF;0UQ9F;0V9NP;12RDJ;1B0U7;KOG0078	RAB10, member RAS oncogene family [Source:MGI Symbol;Acc:MGI:105066]	19325	P61027;Q4FJL0
ENSMUSG00000050022	1159.33	2065.27	253.394	0.122693	-3.02688	1.03088e-70	5.21101e-69	5	140709882	140747194	+	6697	Amz1	GO:0005575;GO:0006508;GO:0006508;GO:0008233;GO:0008233;GO:0008237;GO:0008237;GO:0016787;GO:0046872;GO:0005575;GO:0006508;GO:0006508;GO:0008233;GO:0008233;GO:0008237;GO:0008237;GO:0016787;GO:0046872;	K06974	EC:3.4.-.-	S;O	0DRMV;18UPR;0IVMN;1CYZB;0UTFM;13NP1;1B06H;0VF51;0A5PZ	archaelysin family metallopeptidase 1 [Source:MGI Symbol;Acc:MGI:2442258]	231842	Q8BVF9;A1L312;Q3UTF6
ENSMUSG00000032802	13861.6	4286.25	23436.9	5.46791	2.45099	1.80432e-70	9.08986e-69	2	151947436	151953296	+	2820	Srxn1	GO:0000166;GO:0005524;GO:0005829;GO:0006979;GO:0016209;GO:0016491;GO:0016667;GO:0032542;GO:0032542;GO:0055114;GO:0055114;GO:0098869;	K12260	EC:1.8.98.2	-	-	sulfiredoxin 1 homolog (S. cerevisiae) [Source:MGI Symbol;Acc:MGI:104971]	76650	Q9D975;A2AQU8
ENSMUSG00000022885	459.433	860.945	57.9218	0.0672771	-3.89374	4.21193e-70	2.11476e-68	16	23043490	23179100	+	4916	St6gal1	GO:0000138;GO:0000139;GO:0000139;GO:0000139;GO:0003835;GO:0003835;GO:0003835;GO:0003835;GO:0005576;GO:0005783;GO:0005794;GO:0005797;GO:0006054;GO:0006054;GO:0006054;GO:0006486;GO:0006486;GO:0006486;GO:0008373;GO:0008373;GO:0008373;GO:0016020;GO:0016021;GO:0016740;GO:0016757;GO:0018279;GO:0018279;GO:0018279;GO:0032580;GO:0032946;GO:0042803;GO:0042803;GO:0042803;GO:0050922;GO:0097503;GO:0097503;GO:…	K00778	EC:2.4.99.1	G	0DGM7;0VCMN;0A32H;1AWXY;12RUZ;1CQ12;0US74;18YM1;KOG2692	beta galactoside alpha 2,6 sialyltransferase 1 [Source:MGI Symbol;Acc:MGI:108470]	20440	Q64685;Q8BM62
ENSMUSG00000035235	637.973	126.82	1149.12	9.06104	3.17968	5.39659e-70	2.70047e-68	14	61835696	61843395	+	1650	Trim13	GO:0002376;GO:0003713;GO:0004842;GO:0004842;GO:0005737;GO:0005737;GO:0005783;GO:0005789;GO:0005789;GO:0005789;GO:0008270;GO:0010332;GO:0010332;GO:0010942;GO:0010942;GO:0016020;GO:0016021;GO:0016239;GO:0016239;GO:0016239;GO:0016239;GO:0016567;GO:0016567;GO:0016740;GO:0030433;GO:0030433;GO:0030433;GO:0030433;GO:0032897;GO:0032897;GO:0043123;GO:0043123;GO:0043123;GO:0043161;GO:0043161;GO:0043161;GO:…	K12003	EC:2.3.2.27	O	0KDQ8;14TXB	tripartite motif-containing 13 [Source:MGI Symbol;Acc:MGI:1913847]	66597	Q9CYB0;Q3TSD2
ENSMUSG00000021366	2269.84	736.55	3803.14	5.16345	2.36833	6.30254e-70	3.14326e-68	13	42205497	42346013	+	9294	Hivep1	GO:0000122;GO:0000122;GO:0000978;GO:0001227;GO:0003676;GO:0005634;GO:0005634;GO:0005654;GO:0005739;GO:0005829;GO:0008270;GO:0016604;GO:0030509;GO:0045944;GO:1990837;	K09239	-	K	0VAS5;0DME5;13IMQ;0UH3W;KOG1721;09ZVR;19049;1ARNR;1CW9C	human immunodeficiency virus type I enhancer binding protein 1 [Source:MGI Symbol;Acc:MGI:96100]	110521	F8VPM9
ENSMUSG00000029826	5407.19	1973.78	8840.61	4.47904	2.16319	9.83712e-70	4.8897e-68	6	38282221	38331538	-	6518	Zc3hav1	GO:0003950;GO:0005829;GO:0046872;GO:0046872;GO:0002376;GO:0003723;GO:0003723;GO:0003950;GO:0005634;GO:0005634;GO:0005737;GO:0005737;GO:0005829;GO:0006471;GO:0009615;GO:0009615;GO:0017151;GO:0032481;GO:0032727;GO:0032728;GO:0032781;GO:0042802;GO:0043123;GO:0045071;GO:0045071;GO:0045087;GO:0046872;GO:0046872;GO:0050691;GO:0051607;GO:0061014;GO:0061014;GO:0071360;GO:0098586;GO:1900246;GO:0002376;GO:…	K15259	EC:2.4.2.30	K	1DE2C;0V25N;1BAIQ;0KE5N;131I4;0W34Z;0E76D;0AQM1	zinc finger CCCH type, antiviral 1 [Source:MGI Symbol;Acc:MGI:1926031]	78781	Q3UPF5
ENSMUSG00000048498	323.396	31.6203	615.172	19.455	4.28207	1.60919e-69	7.97216e-68	11	114942743	114953003	-	2088	Cd300e	GO:0002376;GO:0004888;GO:0005886;GO:0005886;GO:0008150;GO:0016020;GO:0016021;	K06719	-	T	196YT;0B1CN;145H6;0JCED;1BAF9;0E6M7;1DDJF;0WDY0;0V1UE	CD300E molecule [Source:MGI Symbol;Acc:MGI:2387602]	217306	Q8K249
ENSMUSG00000032741	999.28	1754.47	244.096	0.139128	-2.84551	1.91229e-69	9.44239e-68	5	120672218	120726738	-	8462	Tpcn1	GO:0005216;GO:0005244;GO:0005245;GO:0005248;GO:0005262;GO:0005764;GO:0005765;GO:0005765;GO:0005765;GO:0005765;GO:0005768;GO:0006811;GO:0006811;GO:0006816;GO:0010008;GO:0010008;GO:0010008;GO:0010008;GO:0010508;GO:0010508;GO:0015280;GO:0016020;GO:0016020;GO:0016021;GO:0034765;GO:0035725;GO:0042802;GO:0042802;GO:0042803;GO:0051209;GO:0055085;GO:0070588;GO:0072345;GO:0072345;GO:0072345;GO:0072345;GO:…	K16896	-	P	0INF7;13BJI;0V2SR;1BAR7;0B3I4;0E7Q8;0WFXF;1DEQB;19727	two pore channel 1 [Source:MGI Symbol;Acc:MGI:2182472]	252972	Q9EQJ0
ENSMUSG00000020393	1547.05	462.057	2632.04	5.69636	2.51004	2.20531e-69	1.08533e-67	11	5141552	5211558	-	7722	Kremen1	GO:0003674;GO:0005886;GO:0006915;GO:0016020;GO:0016020;GO:0016021;GO:0016055;GO:0016055;GO:0030279;GO:0043025;GO:0048681;GO:0060173;GO:0090090;	K23091	-	O;T;G	0V3A2;0WHDY;1979F;1DFG7;0IR07;0E8I3;0B4V5;1BB3U;13DQD	kringle containing transmembrane protein 1 [Source:MGI Symbol;Acc:MGI:1933988]	84035	Q99N43
ENSMUSG00000020120	24475.4	9107.99	39842.8	4.37449	2.12912	4.716e-69	2.31332e-67	11	16921206	17002381	-	4486	Plek	GO:0002244;GO:0002576;GO:0005080;GO:0005080;GO:0005737;GO:0005737;GO:0005886;GO:0006904;GO:0007229;GO:0007229;GO:0010572;GO:0010920;GO:0010920;GO:0010925;GO:0010925;GO:0030030;GO:0030030;GO:0030836;GO:0030836;GO:0030836;GO:0030845;GO:0030845;GO:0030866;GO:0030866;GO:0031529;GO:0031529;GO:0031532;GO:0031532;GO:0031532;GO:0032233;GO:0032233;GO:0032587;GO:0032587;GO:0033625;GO:0035556;GO:0042803;GO:…	K19993	-	T	0IFJ7;09XEV;13HUJ;1CTS2;1AS31;18SWX;0V8KH;0DJ0K;0UG9Y	pleckstrin [Source:MGI Symbol;Acc:MGI:1860485]	56193	Q9JHK5;Q5F271
ENSMUSG00000029561	3659.36	383.7	6935.01	18.0741	4.17585	5.02516e-69	2.45689e-67	5	115034997	115050295	+	6374	Oasl2	GO:0000166;GO:0001730;GO:0001730;GO:0001730;GO:0001730;GO:0002376;GO:0003723;GO:0003725;GO:0003725;GO:0003725;GO:0003725;GO:0005524;GO:0005654;GO:0005829;GO:0006164;GO:0009615;GO:0016020;GO:0016740;GO:0016779;GO:0016779;GO:0045071;GO:0045087;GO:0046872;GO:0051607;GO:0051607;GO:0051607;GO:0060700;GO:0001730;GO:0003725;GO:0051607;GO:0001730;GO:0003725;GO:0016779;GO:0051607;GO:0001730;GO:0003725;GO:…	K14608	-	H;J;O	0DF4M;0V4TK;1CP6T;KOG0001;0UR6E;1B7D6;09TUC;12QYV	2'-5' oligoadenylate synthetase-like 2 [Source:MGI Symbol;Acc:MGI:1344390]	23962	Q9Z2F2
ENSMUSG00000052681	14001.7	5419.48	22584	4.16719	2.05908	7.44833e-69	3.62972e-67	10	117649776	117681940	-	2884	Rap1b	GO:0000166;GO:0003924;GO:0003924;GO:0003924;GO:0003924;GO:0003924;GO:0005515;GO:0005525;GO:0005525;GO:0005525;GO:0005525;GO:0005525;GO:0005737;GO:0005811;GO:0005811;GO:0005829;GO:0005829;GO:0005829;GO:0005886;GO:0005886;GO:0005911;GO:0005911;GO:0005911;GO:0007165;GO:0007264;GO:0008283;GO:0009743;GO:0016020;GO:0016020;GO:0016787;GO:0019003;GO:0019003;GO:0019003;GO:0019003;GO:0030054;GO:0032486;GO:…	K07836	-	S;J	0UQZ1;0V73F;12R1D;0DHED;09W54;1CS4D;1AW97;KOG0395;190H7	RAS related protein 1b [Source:MGI Symbol;Acc:MGI:894315]	215449	Q99JI6;Q52L50
ENSMUSG00000039156	1304.62	372.871	2236.36	5.99768	2.5844	1.1753e-68	5.70882e-67	5	54155841	54278399	+	5133	Stim2	GO:0002115;GO:0005246;GO:0005246;GO:0005246;GO:0005246;GO:0005509;GO:0005509;GO:0005509;GO:0005515;GO:0005783;GO:0005783;GO:0005783;GO:0005789;GO:0005886;GO:0005886;GO:0005886;GO:0006811;GO:0006816;GO:0006874;GO:0006874;GO:0006874;GO:0006874;GO:0015279;GO:0015279;GO:0016020;GO:0016021;GO:0016021;GO:0032237;GO:0032237;GO:0032237;GO:0046872;GO:0051928;GO:0051928;GO:0070588;GO:0005246;GO:0005246;GO:…	K18196	-	U	12U3H;1CWUR;0VB42;0DMUQ;1AS6U;18T0S;0UGP7;0A080;KOG4403	stromal interaction molecule 2 [Source:MGI Symbol;Acc:MGI:2151156]	116873	P83093;A5CVE4
ENSMUSG00000020017	2750.9	4570.11	931.692	0.203866	-2.2943	1.21703e-68	5.89232e-67	10	93324630	93355166	+	5549	Hal	GO:0003824;GO:0004397;GO:0004397;GO:0004397;GO:0004397;GO:0004397;GO:0005737;GO:0006547;GO:0006548;GO:0006548;GO:0006548;GO:0016829;GO:0016841;GO:0016841;GO:0019556;GO:0019557;	K01745	EC:4.3.1.3	Q;E	0DKBU;135SB;KOG0222;18WP7;0V9U8;09YWH;0UP94;1CV5M;1AYUG	histidine ammonia lyase [Source:MGI Symbol;Acc:MGI:96010]	15109	P35492;Q8CE60;B2RXW1
ENSMUSG00000037331	5295.19	1950.14	8640.23	4.43056	2.14749	1.87085e-68	9.02853e-67	11	57899890	57952860	+	6829	Larp1	GO:0003723;GO:0000339;GO:0000339;GO:0000340;GO:0000340;GO:0003723;GO:0003730;GO:0003730;GO:0005737;GO:0005737;GO:0005844;GO:0005844;GO:0006413;GO:0006413;GO:0006417;GO:0008190;GO:0008190;GO:0008283;GO:0008283;GO:0008494;GO:0008494;GO:0010494;GO:0010494;GO:0010608;GO:0016239;GO:0017148;GO:0017148;GO:0031369;GO:0031369;GO:0031929;GO:0031929;GO:0031931;GO:0031931;GO:0038202;GO:0038202;GO:0042788;GO:…	K18757	-	O;J	12RRR;0V7PU;0DI11;KOG2590;1CSRR;09WRF;18YBQ;0UP4C;1B0DG	La ribonucleoprotein domain family, member 1 [Source:MGI Symbol;Acc:MGI:1890165]	73158	Q6ZQ58
ENSMUSG00000038151	2055.43	665.065	3445.8	5.18115	2.37327	2.5152e-68	1.20989e-66	10	44313173	44404497	-	5579	Prdm1	GO:0000122;GO:0000122;GO:0000978;GO:0000978;GO:0001227;GO:0001701;GO:0001763;GO:0001822;GO:0001892;GO:0001893;GO:0002250;GO:0002376;GO:0003170;GO:0003279;GO:0003281;GO:0003677;GO:0003700;GO:0003700;GO:0005515;GO:0005515;GO:0005634;GO:0005634;GO:0005634;GO:0005634;GO:0005737;GO:0005737;GO:0005737;GO:0005737;GO:0006357;GO:0007275;GO:0007281;GO:0008168;GO:0009791;GO:0010468;GO:0010628;GO:0010629;GO:…	K24501	EC:2.1.1.-	K	1AYPE;12RIQ;0URIG;1CWT5;0A0FY;0DMXD;18TX7;KOG2461;0VBC3	PR domain containing 1, with ZNF domain [Source:MGI Symbol;Acc:MGI:99655]	12142	Q60636
ENSMUSG00000029570	531.591	979.935	83.2482	0.0849528	-3.55719	2.57933e-68	1.23675e-66	5	140593075	140601300	+	2505	Lfng	GO:0000139;GO:0000139;GO:0001541;GO:0001756;GO:0001756;GO:0002315;GO:0005794;GO:0007275;GO:0007386;GO:0007389;GO:0008375;GO:0008593;GO:0008593;GO:0014807;GO:0016020;GO:0016020;GO:0016021;GO:0016740;GO:0016757;GO:0016757;GO:0030173;GO:0030173;GO:0030217;GO:0032092;GO:0033829;GO:0033829;GO:0033829;GO:0033829;GO:0045747;GO:0046872;GO:0051446;GO:1902367;	K05948	EC:2.4.1.222	O;W;G	09XJB;0DHXV;12TPC;1CTN8;0II9W;0URR2;1AV7S;0V6XF;18YJJ	LFNG O-fucosylpeptide 3-beta-N- acetylglucosaminyltransferase [Source:MGI Symbol;Acc:MGI:1095413]	16848	O09010;B2RRW2
ENSMUSG00000032508	2139.71	700.897	3578.53	5.10565	2.35209	4.11575e-68	1.96712e-66	9	119165000	119170477	-	2576	Myd88	GO:0002238;GO:0002376;GO:0002755;GO:0002755;GO:0005102;GO:0005102;GO:0005121;GO:0005121;GO:0005149;GO:0005149;GO:0005149;GO:0005515;GO:0005515;GO:0005515;GO:0005515;GO:0005634;GO:0005634;GO:0005634;GO:0005737;GO:0005737;GO:0005737;GO:0005829;GO:0005886;GO:0005886;GO:0006909;GO:0006909;GO:0006909;GO:0006915;GO:0006915;GO:0006954;GO:0006954;GO:0006955;GO:0007165;GO:0007166;GO:0007178;GO:0007254;GO:…	K04729	-	T;K	12SM9;0A237;1CWEU;0UQSF;191S8;0VCYQ;0IIN8;0DFRX;1B0YG	myeloid differentiation primary response gene 88 [Source:MGI Symbol;Acc:MGI:108005]	17874	P22366;Q3U7M4
ENSMUSG00000075254	386.451	51.1332	721.769	14.1155	3.81921	4.97701e-68	2.37116e-66	16	33504740	33591946	+	12728	Heg1	GO:0005509;GO:0007043;GO:0007507;GO:0016020;GO:0016021;GO:0005509;GO:0007043;GO:0007507;GO:0016020;GO:0016021;GO:0001570;GO:0001701;GO:0001885;GO:0001886;GO:0001944;GO:0001945;GO:0003017;GO:0003209;GO:0003222;GO:0003281;GO:0005509;GO:0005515;GO:0005515;GO:0005886;GO:0005911;GO:0005911;GO:0007043;GO:0007275;GO:0007507;GO:0007507;GO:0007507;GO:0009791;GO:0009897;GO:0009986;GO:0016020;GO:0016021;GO:…	K24472	-	T	09VDQ;1AT9A;0UHNM;13K4J;1CRC3;0V6CP;18T46;0IJZT;0DGN8	heart development protein with EGF-like domains 1 [Source:MGI Symbol;Acc:MGI:1924696]	77446	E9Q440;Q6DFX1
ENSMUSG00000026829	691.419	150.014	1232.82	8.21806	3.0388	8.57856e-68	4.074e-66	2	28386903	28395427	+	1337	Gbgt1	GO:0000139;GO:0001575;GO:0005794;GO:0005794;GO:0005975;GO:0006486;GO:0016020;GO:0016020;GO:0016021;GO:0016740;GO:0016757;GO:0016757;GO:0016758;GO:0030259;GO:0030259;GO:0031982;GO:0046872;GO:0047277;GO:0047277;GO:0000139;GO:0001575;GO:0005794;GO:0005794;GO:0005975;GO:0006486;GO:0016020;GO:0016020;GO:0016021;GO:0016740;GO:0016757;GO:0016757;GO:0016758;GO:0030259;GO:0030259;GO:0031982;GO:0046872;GO:…	K00722	EC:2.4.1.88	G	0UNRZ;1956A;0IFQJ;0DJWQ;1AYZ7;0V6PN;12R6I;09YGG;1CUQ5	globoside alpha-1,3-N- acetylgalactosaminyltransferase 1 [Source:MGI Symbol;Acc:MGI:2449143]	227671	Q8VI38
ENSMUSG00000060477	3906.01	1414.2	6397.81	4.52398	2.17759	1.65321e-67	7.82626e-66	6	113615428	113671987	+	4412	Irak2	GO:0000166;GO:0001959;GO:0001959;GO:0001959;GO:0002755;GO:0004672;GO:0004672;GO:0005515;GO:0005524;GO:0005524;GO:0005634;GO:0005737;GO:0005886;GO:0006468;GO:0006954;GO:0007165;GO:0007249;GO:0019221;GO:0031663;GO:0032088;GO:0032088;GO:0035556;GO:0042803;GO:0042803;GO:0042981;GO:0043433;GO:0046982;GO:0046982;GO:0051092;GO:0051092;GO:0051092;GO:0070498;GO:0070498;GO:0070498;GO:0070498;GO:0070555;GO:…	K04731	EC:2.7.11.1	T	0VCW6;KOG1187;1B38V;1CYMY;18TZG;0DPNZ;0A211;0UT05;13JWZ	interleukin-1 receptor-associated kinase 2 [Source:MGI Symbol;Acc:MGI:2429603]	108960	Q8CFA1
ENSMUSG00000034247	4376.95	7228.61	1525.28	0.211006	-2.24464	8.84472e-67	4.17381e-65	11	103255101	103303513	-	5968	Plekhm1	GO:0005515;GO:0005515;GO:0005730;GO:0005737;GO:0005764;GO:0005765;GO:0005768;GO:0006914;GO:0010008;GO:0015031;GO:0016020;GO:0032418;GO:0035556;GO:0043231;GO:0045780;GO:0046872;GO:1900029;	K23282	-	T	0KDQT;0WD89;1BA8W;196W7;14TY2;0B0QY;1DD3P;0E64E;0V1H1	pleckstrin homology domain containing, family M (with RUN domain) member 1 [Source:MGI Symbol;Acc:MGI:2443207]	353047	Q7TSI1
ENSMUSG00000066026	2334.86	3886.05	783.674	0.201663	-2.30998	1.15698e-66	5.44256e-65	4	144619397	144654779	+	2927	Dhrs3	GO:0001523;GO:0001523;GO:0003151;GO:0004745;GO:0004745;GO:0004745;GO:0005811;GO:0016020;GO:0016021;GO:0016491;GO:0016616;GO:0030278;GO:0042572;GO:0048385;GO:0048387;GO:0052650;GO:0055114;GO:0055114;GO:0060021;GO:0060349;GO:0060411;GO:0004745;GO:0042572;GO:0055114;GO:0001523;GO:0001523;GO:0003151;GO:0004745;GO:0004745;GO:0004745;GO:0005811;GO:0016020;GO:0016021;GO:0016491;GO:0016616;GO:0030278;GO:…	K11146	EC:1.1.1.300	Q	1CSA6;KOG1201;0UJSN;18Z3C;1B3DA;0DHJV;12U70;09WAI;0V78T	dehydrogenase/reductase (SDR family) member 3 [Source:MGI Symbol;Acc:MGI:1315215]	20148	O88876
ENSMUSG00000025324	490.908	84.2512	897.564	10.6534	3.41325	1.28112e-66	6.00755e-65	7	58305914	58479168	+	5587	Atp10a	GO:0000287;GO:0005524;GO:0015914;GO:0016020;GO:0016021;GO:0016021;GO:0034204;GO:0140326;GO:0000166;GO:0000166;GO:0000287;GO:0000287;GO:0005524;GO:0005524;GO:0005783;GO:0005783;GO:0005783;GO:0005789;GO:0005886;GO:0005886;GO:0005887;GO:0006869;GO:0015914;GO:0016020;GO:0016021;GO:0016021;GO:0034204;GO:0045332;GO:0046872;GO:0140326;GO:0140326;GO:0140326;GO:0140345;GO:0140345;GO:0140351;GO:1903527;GO:…	K01530	EC:7.6.2.1	P	18VYM;0UJDW;0DHAP;12NWG;1ASE6;KOG0206;1CS0T;09U13;0V6ZX	ATPase, class V, type 10A [Source:MGI Symbol;Acc:MGI:1330809]	11982	O54827;Q3V1Y7;Q6A046
ENSMUSG00000040483	1349.68	167.341	2532.03	15.131	3.91943	1.30275e-66	6.08985e-65	11	72192455	72204559	+	4689	Xaf1	GO:0006915;GO:0005634;GO:0005634;GO:0005654;GO:0005737;GO:0005739;GO:0005739;GO:0006915;GO:0006915;GO:0031333;GO:0035456;GO:0046872;GO:0005634;GO:0005634;GO:0005654;GO:0005737;GO:0005739;GO:0005739;GO:0006915;GO:0006915;GO:0031333;GO:0035456;GO:0046872;GO:0006915;	-	-	T	13IV2;1CY4E;0IK96;0VBJP;0USIR;0DP6F;0A1ID;1B2PI;193Q8	XIAP associated factor 1 [Source:MGI Symbol;Acc:MGI:3772572]	327959	Q5NBU8
ENSMUSG00000035284	1677.98	2835.68	520.284	0.183477	-2.44633	1.75919e-66	8.1978e-65	9	67747678	67902920	+	16299	Vps13c	GO:0003674;GO:0005739;GO:0005741;GO:0005741;GO:0005741;GO:0005829;GO:0005829;GO:0006623;GO:0007005;GO:0007005;GO:0007005;GO:0016020;GO:0019898;GO:0032127;GO:0032868;GO:0045053;GO:1905090;GO:1905090;GO:1905090;	K19525	-	U	12PEB;1CX8F;0DHTX;1AXYH;09WIM;0UNYP;0V7H5;KOG1809;18U97	vacuolar protein sorting 13C [Source:MGI Symbol;Acc:MGI:2444207]	320528	Q8BX70;A1ILG8
ENSMUSG00000049866	3040.35	5910.63	170.059	0.0287717	-5.11921	2.09213e-66	9.71896e-65	1	88600847	88629943	-	5492	Arl4c	GO:0000166;GO:0005525;GO:0005525;GO:0005525;GO:0005737;GO:0005737;GO:0005829;GO:0005886;GO:0005886;GO:0005886;GO:0006886;GO:0016020;GO:0016192;GO:0030175;GO:0032456;GO:0032456;GO:0032456;GO:0042995;GO:0043014;GO:0043014;GO:0000166;GO:0005525;GO:0005525;GO:0005525;GO:0005737;GO:0005737;GO:0005829;GO:0005886;GO:0005886;GO:0005886;GO:0006886;GO:0016020;GO:0016192;GO:0030175;GO:0032456;GO:0032456;GO:…	K07945	-	U	1CRVI;0UM0P;0DH58;0V6VJ;KOG0070;195MH;09VX4;1AWGR;13HDS	ADP-ribosylation factor-like 4C [Source:MGI Symbol;Acc:MGI:2445172]	320982	P61208
ENSMUSG00000030269	1572.73	490.25	2655.2	5.41601	2.43723	3.55512e-66	1.6464e-64	6	113214804	113258353	+	3006	Mtmr14	GO:0001726;GO:0001726;GO:0004438;GO:0004438;GO:0004438;GO:0004438;GO:0004725;GO:0005737;GO:0016311;GO:0016787;GO:0035335;GO:0048471;GO:0048471;GO:0004438;GO:0016311;GO:0004438;GO:0016311;GO:0004438;GO:0016311;GO:0004438;GO:0004438;GO:0004725;GO:0016311;GO:0035335;GO:0004438;GO:0004438;GO:0004725;GO:0016311;GO:0035335;GO:0004438;GO:0016311;GO:0004438;GO:0016311;	K18086	-	S	0DEN7;1B1W4;0V4A1;0UFN0;190ZI;1CPC3;0IHSK;130CG;09TAW	myotubularin related protein 14 [Source:MGI Symbol;Acc:MGI:1916075]	97287	Q8VEL2
ENSMUSG00000040760	1873.91	609.929	3137.9	5.1447	2.36309	3.63601e-66	1.67864e-64	14	26640945	26693189	-	8719	Appl1	GO:0001726;GO:0001786;GO:0001786;GO:0001786;GO:0005515;GO:0005634;GO:0005634;GO:0005634;GO:0005737;GO:0005737;GO:0005737;GO:0005768;GO:0005768;GO:0005768;GO:0005769;GO:0005769;GO:0005769;GO:0005829;GO:0005829;GO:0005886;GO:0005886;GO:0005886;GO:0006606;GO:0006606;GO:0006606;GO:0007049;GO:0007179;GO:0007179;GO:0007179;GO:0008286;GO:0008286;GO:0008286;GO:0008286;GO:0010008;GO:0010008;GO:0010008;GO:…	K08733	-	T	18WY5;09TRU;0DF27;1AWTM;0V4R5;KOG0521;0UMEF;1CR9M;12QH7;KOG3536	adaptor protein, phosphotyrosine interaction, PH domain and leucine zipper containing 1 [Source:MGI Symbol;Acc:MGI:1920243]	72993	Q8K3H0
ENSMUSG00000048249	867.378	1527.4	207.358	0.135759	-2.88088	4.03811e-66	1.85853e-64	17	26934624	26995609	+	8564	Crebrf	GO:0000122;GO:0000122;GO:0000977;GO:0000977;GO:0000981;GO:0001228;GO:0003700;GO:0005634;GO:0005634;GO:0005654;GO:0005737;GO:0005737;GO:0006355;GO:0006357;GO:0006986;GO:0006986;GO:0016604;GO:0016604;GO:0032388;GO:0032388;GO:0034976;GO:0034976;GO:0042711;GO:0045732;GO:0045732;GO:0045944;GO:0051222;GO:0051222;GO:1900102;GO:1900102;GO:1900170;GO:1900170;GO:1902213;GO:0006986;GO:0000977;GO:0001228;GO:…	K21554	-	K	0V7AR;09WCB;18WDA;12NQM;0DHMQ;1CSC5;0UJV0;0IHZR;1AVC7	CREB3 regulatory factor [Source:MGI Symbol;Acc:MGI:1924378]	77128	Q8CDG5
ENSMUSG00000044786	4364.41	1618.7	7110.12	4.3925	2.13504	5.47707e-66	2.51305e-64	7	28076209	28079678	-	3470	Zfp36	GO:0000122;GO:0000122;GO:0000165;GO:0000165;GO:0000288;GO:0000289;GO:0000932;GO:0000932;GO:0003677;GO:0003729;GO:0003729;GO:0003730;GO:0005515;GO:0005515;GO:0005634;GO:0005634;GO:0005737;GO:0005737;GO:0005829;GO:0006357;GO:0006402;GO:0006402;GO:0007275;GO:0009611;GO:0009611;GO:0010494;GO:0010494;GO:0010837;GO:0010837;GO:0019899;GO:0019901;GO:0019957;GO:0030014;GO:0031072;GO:0031086;GO:0031086;GO:…	K15308	-	S;T;K	0A0X5;0DNIG;0VBTI;1ASN6;0URVR;1CURJ;18ZEI;13UR4;KOG1677	zinc finger protein 36 [Source:MGI Symbol;Acc:MGI:99180]	22695	P22893;Q3U3D2
ENSMUSG00000024732	1297.63	385.543	2209.71	5.73141	2.51889	7.04221e-66	3.22127e-64	19	10918845	10926630	-	5774	Ccdc86	GO:0005634;GO:0005634;GO:0005654;GO:0005654;GO:0005694;GO:0005730;GO:0005730;GO:0005730;	K14822	-	S	0VFSG;13W7I;1AS7H;KOG4538;0DSCT;1D1N8;0UFYK;18UHE;0A41T	coiled-coil domain containing 86 [Source:MGI Symbol;Acc:MGI:1277220]	108673	Q9JJ89
ENSMUSG00000049225	760.009	1351.15	168.872	0.124984	-3.00018	1.09932e-65	5.01316e-64	4	11958184	11966452	-	4507	Pdp1	GO:0000287;GO:0004721;GO:0004722;GO:0004722;GO:0004724;GO:0004724;GO:0004741;GO:0004741;GO:0004741;GO:0005509;GO:0005509;GO:0005739;GO:0005739;GO:0005739;GO:0005759;GO:0006470;GO:0006470;GO:0006470;GO:0016787;GO:0016791;GO:0035970;GO:0043169;GO:0044877;GO:0046872;GO:1904184;GO:0004721;GO:0004722;GO:0004722;GO:0006470;GO:0016787;GO:0016791;GO:0035970;GO:0043169;GO:0046872;GO:0004721;GO:0004722;GO:…	K01102	EC:3.1.3.43	T	13A7V;0UU66;1CWAY;KOG0700;09YR5;18S7D;1AW6T;0VATK;0DMFM	pyruvate dehyrogenase phosphatase catalytic subunit 1 [Source:MGI Symbol;Acc:MGI:2685870]	381511	Q3UV70;A8Y5Q1
ENSMUSG00000078453	1188.42	341.748	2035.1	5.95498	2.5741	1.94436e-65	8.83974e-64	10	17887008	17899036	-	1056	Abracl	-	-	-	Z;S	0VKDD;1D4Z1;1B68B;0UW4W;193SH;KOG3376;0A9K0;13URY;0DVQ2	ABRA C-terminal like [Source:MGI Symbol;Acc:MGI:1920362]	73112	Q4KML4;E9QMV2
ENSMUSG00000045092	1665.44	2915.05	415.819	0.142645	-2.8095	6.28074e-65	2.84676e-63	3	115504082	115508721	-	3046	S1pr1	GO:0001525;GO:0001525;GO:0001525;GO:0001664;GO:0001664;GO:0001955;GO:0003245;GO:0003376;GO:0003376;GO:0003376;GO:0003376;GO:0004930;GO:0004930;GO:0004930;GO:0004930;GO:0004930;GO:0005654;GO:0005654;GO:0005737;GO:0005768;GO:0005886;GO:0005886;GO:0005901;GO:0006935;GO:0007165;GO:0007186;GO:0007186;GO:0007186;GO:0007186;GO:0007189;GO:0007193;GO:0007193;GO:0007420;GO:0008284;GO:0009897;GO:0016020;GO:…	K04288	-	T	13190;0DENT;1ARQ6;09TH0;0IIA7;1916J;1CPCM;0V4G0;0UFVA	sphingosine-1-phosphate receptor 1 [Source:MGI Symbol;Acc:MGI:1096355]	13609	O08530
ENSMUSG00000030691	1069.06	299.901	1838.23	6.12945	2.61576	6.49609e-65	2.93544e-63	7	100742070	100933612	+	16627	Fchsd2	GO:0005515;GO:0005547;GO:0005547;GO:0005737;GO:0005886;GO:0005886;GO:0005905;GO:0005905;GO:0006897;GO:0007274;GO:0008289;GO:0015031;GO:0016020;GO:0030054;GO:0030833;GO:0030838;GO:0031594;GO:0032420;GO:0042995;GO:0043325;GO:0043325;GO:0044803;GO:0055037;GO:0072583;GO:0072583;GO:0120043;GO:2000601;GO:2000601;GO:0005515;GO:0005547;GO:0005547;GO:0005737;GO:0005886;GO:0005886;GO:0005905;GO:0005905;GO:…	K20125	-	Z	0WG1N;0INNZ;0E7SU;1DESP;13BS4;0B3MQ;1BASM;0V2UI;1972W	FCH and double SH3 domains 2 [Source:MGI Symbol;Acc:MGI:2448475]	207278	Q3USJ8
ENSMUSG00000066150	3624.73	1240.71	6008.75	4.84301	2.2759	8.58225e-65	3.86642e-63	4	62278964	62310006	+	4280	Slc31a1	GO:0005375;GO:0005375;GO:0005375;GO:0005375;GO:0005515;GO:0005737;GO:0005737;GO:0005770;GO:0005886;GO:0005886;GO:0005886;GO:0005886;GO:0006811;GO:0006825;GO:0006878;GO:0006878;GO:0015677;GO:0015677;GO:0016020;GO:0016021;GO:0016021;GO:0035434;GO:0042802;GO:0042802;GO:0043025;GO:0043025;GO:0055037;GO:0055085;GO:0055085;GO:0072719;GO:0072719;GO:0098705;GO:0098705;GO:0005375;GO:0005375;GO:0006811;GO:…	K14686	-	P	13KG1;0A3K7;KOG3386;0UTMF;0DHU7;0VEFE;18YFA;1B37C;1CZHW	solute carrier family 31, member 1 [Source:MGI Symbol;Acc:MGI:1333843]	20529	Q8K211
ENSMUSG00000032690	2687.96	950.819	4425.1	4.65399	2.21847	9.72468e-65	4.36791e-63	5	120868398	120887918	-	4451	Oas2	GO:0000166;GO:0001730;GO:0001730;GO:0001730;GO:0001730;GO:0002376;GO:0003723;GO:0003725;GO:0003725;GO:0003725;GO:0005524;GO:0005524;GO:0005654;GO:0005737;GO:0005737;GO:0005829;GO:0006401;GO:0009615;GO:0009617;GO:0016020;GO:0016740;GO:0016779;GO:0016779;GO:0045071;GO:0045087;GO:0046872;GO:0048471;GO:0048471;GO:0051607;GO:0051607;GO:0051607;GO:0060337;GO:0060700;GO:1903487;GO:0000166;GO:0001730;GO:…	K14216	EC:2.7.7.84	J;O	0DF4M;0V4TK;1CP6T;KOG0001;0UKKA;1AW2R;09TUC;12QYV	2'-5' oligoadenylate synthetase 2 [Source:MGI Symbol;Acc:MGI:2180852]	246728	E9Q9A9
ENSMUSG00000036206	636.913	139.157	1134.67	8.15385	3.02748	2.33549e-64	1.04585e-62	1	88998137	89082790	+	5112	Sh3bp4	GO:0005092;GO:0005092;GO:0005092;GO:0005634;GO:0005737;GO:0005737;GO:0005737;GO:0005737;GO:0005905;GO:0006897;GO:0008285;GO:0008285;GO:0008285;GO:0010508;GO:0010508;GO:0010508;GO:0016020;GO:0030136;GO:0030308;GO:0030308;GO:0030308;GO:0031267;GO:0031267;GO:0031410;GO:0032007;GO:0032007;GO:0032007;GO:0032007;GO:0034260;GO:0034260;GO:0034260;GO:0042802;GO:0042802;GO:0050790;GO:0050790;GO:0050790;GO:…	K20066	-	T;U	12P27;09V12;0DGAE;1B1K0;191T7;0IEE9;0UI0H;0V60P;1CQZU	SH3-domain binding protein 4 [Source:MGI Symbol;Acc:MGI:2138297]	98402	Q921I6
ENSMUSG00000047810	2512.66	884.402	4140.93	4.68218	2.22718	2.34789e-64	1.04826e-62	19	6821991	6835579	-	5032	Ccdc88b	GO:0001819;GO:0005737;GO:0005737;GO:0005783;GO:0005794;GO:0005813;GO:0005856;GO:0008017;GO:0016020;GO:0030705;GO:0030705;GO:0031122;GO:0042102;GO:0042832;GO:0050870;GO:0051959;	-	-	Z;I;E	0A59N;1D13T;140CN;0DSH2;18VWT;0VEAG;1ASG7;0UG96;KOG4643	coiled-coil domain containing 88B [Source:MGI Symbol;Acc:MGI:1925567]	78317	Q4QRL3
ENSMUSG00000027962	2283.44	316.991	4249.88	13.4069	3.74491	4.07117e-64	1.81222e-62	3	115903598	115923337	-	8870	Vcam1	GO:0001666;GO:0002102;GO:0002526;GO:0002544;GO:0005178;GO:0005178;GO:0005615;GO:0005615;GO:0005769;GO:0005783;GO:0005794;GO:0005902;GO:0007155;GO:0007155;GO:0007155;GO:0007155;GO:0007157;GO:0007159;GO:0007160;GO:0007568;GO:0007584;GO:0008131;GO:0009308;GO:0009897;GO:0009986;GO:0009986;GO:0010043;GO:0010212;GO:0016020;GO:0016020;GO:0016021;GO:0016021;GO:0022614;GO:0030175;GO:0032496;GO:0034113;GO:…	K06527	-	T;W	192A3;0UMK3;13HUA;0DKW8;0VAAU;09ZDU;1CVRD;1AZMG;0IIKS	vascular cell adhesion molecule 1 [Source:MGI Symbol;Acc:MGI:98926]	22329	Q3UPN1
ENSMUSG00000027111	1149.22	1973.62	324.826	0.164584	-2.6031	4.82371e-64	2.14081e-62	2	71575960	71688760	+	9142	Itga6	GO:0005515;GO:0005515;GO:0005604;GO:0005886;GO:0005886;GO:0005912;GO:0007155;GO:0007155;GO:0007160;GO:0007229;GO:0008305;GO:0008305;GO:0009897;GO:0009925;GO:0009986;GO:0010811;GO:0010976;GO:0016020;GO:0016021;GO:0016323;GO:0022409;GO:0030056;GO:0030175;GO:0030335;GO:0031589;GO:0031668;GO:0031994;GO:0031994;GO:0034676;GO:0035878;GO:0038132;GO:0038132;GO:0042327;GO:0042475;GO:0043065;GO:0043236;GO:…	K06485	-	W	0V44B;0UMX6;18V8Y;KOG3637;0DMTK;12N24;1AXU6;09UEE;1CY9G	integrin alpha 6 [Source:MGI Symbol;Acc:MGI:96605]	16403	Q61739;Q6PEE8
ENSMUSG00000048216	385.835	35.6881	735.983	20.6227	4.36616	9.02377e-64	3.99295e-62	6	13834457	13839941	-	4083	Gpr85	GO:0004930;GO:0004930;GO:0004930;GO:0005783;GO:0005783;GO:0005783;GO:0005886;GO:0005886;GO:0005886;GO:0005886;GO:0005887;GO:0007165;GO:0007186;GO:0007186;GO:0016020;GO:0016021;GO:0016021;GO:0004930;GO:0004930;GO:0004930;GO:0005783;GO:0005783;GO:0005886;GO:0005886;GO:0005886;GO:0005887;GO:0007165;GO:0007186;GO:0007186;GO:0016020;GO:0016021;GO:0016021;GO:0004930;GO:0004930;GO:0004930;GO:0005783;GO:…	K04302	-	T	KOG3656;13KZQ;191EN;09Z3W;0VA1A;1B1AT;1CVDU;0URDJ;0DKJJ	G protein-coupled receptor 85 [Source:MGI Symbol;Acc:MGI:1927851]	64450	P60894;Q6ZWR2
ENSMUSG00000040613	11191.1	17845.9	4536.39	0.254198	-1.97598	9.05967e-64	3.99698e-62	6	122554751	122579403	-	2702	Apobec1	GO:0003723;GO:0003729;GO:0003729;GO:0003824;GO:0004126;GO:0004126;GO:0004126;GO:0004131;GO:0004131;GO:0005515;GO:0005634;GO:0005634;GO:0005634;GO:0005737;GO:0005737;GO:0005737;GO:0005737;GO:0006397;GO:0006641;GO:0006970;GO:0006970;GO:0008047;GO:0008047;GO:0008270;GO:0009972;GO:0010043;GO:0010332;GO:0016554;GO:0016554;GO:0016554;GO:0016556;GO:0016556;GO:0016787;GO:0016787;GO:0019904;GO:0019904;GO:…	K16932	EC:3.5.4.36	K	0IKDF;0VDJ5;1B207;1CZCX;13HK8;1930E;0A2PB;0UTK5;0DQB0	apolipoprotein B mRNA editing enzyme, catalytic polypeptide 1 [Source:MGI Symbol;Acc:MGI:103298]	11810	P51908;Q3U9G8
ENSMUSG00000017765	1684.38	552.524	2816.23	5.09702	2.34965	1.84757e-63	8.12714e-62	8	106670222	106692729	-	4279	Slc12a4	GO:0006811;GO:0006811;GO:0006813;GO:0006884;GO:0007268;GO:0015293;GO:0015377;GO:0015379;GO:0015379;GO:0016020;GO:0016020;GO:0016021;GO:0016021;GO:0019901;GO:0022857;GO:0045202;GO:0055064;GO:0055075;GO:0055085;GO:0071805;GO:1902476;GO:1902476;GO:1990573;GO:0006811;GO:0006811;GO:0006813;GO:0015293;GO:0015377;GO:0015379;GO:0016020;GO:0016020;GO:0016021;GO:0016021;GO:0019901;GO:0022857;GO:0055085;GO:…	K14427	-	P	18XV2;1AUE8;KOG2082;0DITF;0UIXA;12RG5;1CTIT;0V4WR;09XFV	solute carrier family 12, member 4 [Source:MGI Symbol;Acc:MGI:1309465]	20498	Q9JIS8;Q3TWZ6
ENSMUSG00000058835	7215.35	2864.33	11566.4	4.03808	2.01367	4.61777e-63	2.0253e-61	2	22830085	22930253	-	4032	Abi1	GO:0001756;GO:0005515;GO:0005515;GO:0005515;GO:0005634;GO:0005737;GO:0005829;GO:0005856;GO:0005886;GO:0008134;GO:0008154;GO:0014069;GO:0014069;GO:0016235;GO:0017124;GO:0017124;GO:0018108;GO:0030027;GO:0030027;GO:0030027;GO:0030054;GO:0030054;GO:0030175;GO:0030296;GO:0030296;GO:0030426;GO:0031209;GO:0031209;GO:0031252;GO:0032433;GO:0035591;GO:0035855;GO:0042995;GO:0043005;GO:0045202;GO:0048813;GO:…	K23649	-	Z;T	1AV0K;1CTQA;0UMM7;18T6C;09TZX;0V50N;0DFBH;12S1T;KOG2546	abl interactor 1 [Source:MGI Symbol;Acc:MGI:104913]	11308	Q8CBW3;Q3TPY5
ENSMUSG00000039531	924.854	251.89	1597.82	6.34332	2.66524	5.00219e-63	2.18747e-61	10	33795138	33827265	-	9072	Zup1	GO:0004843;GO:0005634;GO:0005634;GO:0005737;GO:0006508;GO:0010468;GO:0016787;GO:0018215;GO:0046872;GO:0004843;GO:0005634;GO:0005634;GO:0005737;GO:0006508;GO:0010468;GO:0016787;GO:0018215;GO:0046872;GO:0004843;GO:0006508;GO:0018215;GO:0004843;GO:0005634;GO:0005634;GO:0005737;GO:0006508;GO:0010468;GO:0016787;GO:0018215;GO:0046872;GO:0004843;GO:0005634;GO:0005634;GO:0005737;GO:0006508;GO:0010468;GO:…	K24134	EC:3.4.19.12	S;J	1AUZ3;18YT7;0DJ59;0V8QT;09XT6;12TWJ;0UU14;1CTX4;KOG4696	zinc finger containing ubiquitin peptidase 1 [Source:MGI Symbol;Acc:MGI:1919830]	72580	Q3T9Z9
ENSMUSG00000028793	2732.93	987.913	4477.94	4.53273	2.18038	6.8017e-63	2.9657e-61	4	128952064	128979679	+	2872	Rnf19b	GO:0004842;GO:0016020;GO:0016021;GO:0016567;GO:0016740;GO:0046872;GO:0000151;GO:0000209;GO:0002250;GO:0002376;GO:0004842;GO:0005737;GO:0005783;GO:0005783;GO:0005783;GO:0005789;GO:0005829;GO:0005829;GO:0006511;GO:0016020;GO:0016021;GO:0016567;GO:0016567;GO:0016740;GO:0031624;GO:0032436;GO:0042267;GO:0043130;GO:0043130;GO:0043130;GO:0044194;GO:0044194;GO:0046872;GO:0051865;GO:0051865;GO:0051865;GO:…	K11973	EC:2.3.2.31	O	18XVN;12T1W;KOG1815;09U0D;0DFA5;0UHNW;0V4Z6;1AURC;1CPZV	ring finger protein 19B [Source:MGI Symbol;Acc:MGI:1922484]	75234	-
ENSMUSG00000050390	1972.82	3461.93	483.718	0.139725	-2.83934	8.38992e-63	3.64754e-61	4	129113371	129155197	-	5770	C77080	GO:0003674;GO:0005575;GO:0030154;GO:0003674;GO:0005575;GO:0030154;GO:0003674;GO:0005575;GO:0030154;	-	-	S	1B283;18VVI;0IMX5;0UUQ6;0A4WU;13JZ3;0VFRG;1CW11;0DSBW	expressed sequence C77080 [Source:MGI Symbol;Acc:MGI:2140651]	97130	A2A7S8
ENSMUSG00000020077	2672.97	517.337	4828.6	9.33358	3.22243	1.01385e-62	4.39424e-61	10	62329612	62363230	-	2196	Srgn	GO:0000139;GO:0001818;GO:0005515;GO:0005518;GO:0005576;GO:0005615;GO:0005615;GO:0005794;GO:0005794;GO:0006915;GO:0016485;GO:0030141;GO:0030502;GO:0030502;GO:0030502;GO:0031214;GO:0033363;GO:0033364;GO:0033371;GO:0033373;GO:0033382;GO:0042588;GO:0042629;GO:0050804;GO:0098685;GO:0098978;GO:0099091;GO:0099175;GO:0140507;GO:0140507;GO:0000139;GO:0001818;GO:0005515;GO:0005518;GO:0005576;GO:0005615;GO:…	K06849	-	O;W	0VJF3;1D3YT;0J42T;0UVQV;196GD;0DUMG;1B66S;0A8TU;13X45	serglycin [Source:MGI Symbol;Acc:MGI:97756]	19073	P13609
ENSMUSG00000005686	7185.8	1887.31	12484.3	6.61484	2.72571	1.01664e-62	4.39424e-61	7	110367413	110411612	+	5627	Ampd3	GO:0003876;GO:0003876;GO:0003876;GO:0003876;GO:0003876;GO:0005829;GO:0006188;GO:0006188;GO:0006196;GO:0009117;GO:0009168;GO:0016787;GO:0019239;GO:0032264;GO:0032264;GO:0034101;GO:0046031;GO:0046031;GO:0046033;GO:0046033;GO:0046033;GO:0046034;GO:0046034;GO:0046039;GO:0046872;GO:0097009;GO:0003876;GO:0003876;GO:0009168;GO:0016787;GO:0019239;GO:0032264;GO:0032264;GO:0046872;GO:0003876;GO:0003876;GO:…	K01490	EC:3.5.4.6	F	KOG1096;0V4C6;12PUK;0DG0K;1CX9I;0URR7;09UQP;1B370;1918F	adenosine monophosphate deaminase 3 [Source:MGI Symbol;Acc:MGI:1096344]	11717	O08739
ENSMUSG00000026819	913.444	249.498	1577.39	6.32227	2.66044	1.08238e-62	4.66488e-61	2	32304499	32341457	-	7862	Slc25a25	GO:0002021;GO:0005347;GO:0005509;GO:0005739;GO:0005739;GO:0005743;GO:0005743;GO:0014823;GO:0015867;GO:0016020;GO:0016021;GO:0032094;GO:0035264;GO:0043010;GO:0045333;GO:0046034;GO:0046872;GO:0055085;GO:0060612;GO:0070588;GO:0002021;GO:0005347;GO:0005509;GO:0005739;GO:0005739;GO:0005743;GO:0005743;GO:0014823;GO:0015867;GO:0016020;GO:0016021;GO:0032094;GO:0035264;GO:0043010;GO:0045333;GO:0046034;GO:…	K14684	-	C	0UQ1M;1B534;09UKJ;KOG0036;1CQJN;0DFWA;0V5JZ;12PNQ;18XHV	solute carrier family 25 (mitochondrial carrier, phosphate carrier), member 25 [Source:MGI Symbol;Acc:MGI:1915913]	227731	A2ASZ8
ENSMUSG00000029050	1722.99	2879.36	566.621	0.196787	-2.34529	2.21517e-62	9.51951e-61	4	155238532	155307049	-	5562	Ski	GO:0006351;GO:0046332;GO:0000122;GO:0001227;GO:0005634;GO:0005654;GO:0005813;GO:0006351;GO:0008270;GO:0008285;GO:0010626;GO:0014902;GO:0016604;GO:0016605;GO:0019901;GO:0019904;GO:0030512;GO:0030514;GO:0031625;GO:0032926;GO:0032991;GO:0042802;GO:0043388;GO:0045668;GO:0046332;GO:0046332;GO:0060395;GO:0070491;	-	-	K	12TFK;0A15U;0VC1Z;0DNTQ;1CXR1;0UTY1;0IFDK;18XXZ;1AYQW	ski sarcoma viral oncogene homolog (avian) [Source:MGI Symbol;Acc:MGI:98310]	20481	-
ENSMUSG00000042190	1168.01	351.339	1984.68	5.64889	2.49797	3.20541e-62	1.37354e-60	5	113750415	113788487	-	3408	Cmklr1	GO:0002430;GO:0004875;GO:0004930;GO:0004930;GO:0004930;GO:0005886;GO:0005886;GO:0005886;GO:0006935;GO:0006935;GO:0006954;GO:0007165;GO:0007186;GO:0007186;GO:0007186;GO:0007200;GO:0007204;GO:0010759;GO:0010759;GO:0016020;GO:0016021;GO:0016021;GO:0032088;GO:0032088;GO:0032695;GO:0045600;GO:0050848;GO:0050848;GO:0120162;GO:0004930;GO:0004930;GO:0005886;GO:0007165;GO:0007186;GO:0007186;GO:0016020;GO:…	K04245	-	T	09YRX;1CTRF;0DNT1;0II0H;1AY9T;0UUGE;13FV7;18VUS;0V7XT	chemokine-like receptor 1 [Source:MGI Symbol;Acc:MGI:109603]	14747	P97468;Q497D3
ENSMUSG00000006403	468.283	4.00609	932.56	232.786	7.86286	3.31485e-62	1.41636e-60	1	171077990	171088206	+	4810	Adamts4	GO:0002020;GO:0004222;GO:0004222;GO:0004222;GO:0005515;GO:0005576;GO:0005615;GO:0006508;GO:0006508;GO:0006508;GO:0008233;GO:0008233;GO:0008237;GO:0008237;GO:0008237;GO:0016607;GO:0016787;GO:0030198;GO:0031012;GO:0042742;GO:0046872;GO:0062023;GO:0002020;GO:0004222;GO:0005576;GO:0005615;GO:0006508;GO:0006508;GO:0008233;GO:0008233;GO:0008237;GO:0008237;GO:0016607;GO:0016787;GO:0046872;GO:0004222;GO:…	K07764	EC:3.4.24.82	-	-	a disintegrin-like and metallopeptidase (reprolysin type) with thrombospondin type 1 motif, 4 [Source:MGI Symbol;Acc:MGI:1339949]	240913	Q8BNJ2
ENSMUSG00000040943	2753.64	848.111	4659.17	5.49359	2.45775	5.42352e-62	2.31073e-60	3	133169440	133250900	-	16870	Tet2	GO:0001822;GO:0002318;GO:0003677;GO:0005515;GO:0005634;GO:0005634;GO:0005654;GO:0006211;GO:0006211;GO:0006211;GO:0006325;GO:0006493;GO:0006493;GO:0007049;GO:0008198;GO:0008198;GO:0008270;GO:0008270;GO:0009791;GO:0016491;GO:0019857;GO:0019858;GO:0020027;GO:0030097;GO:0030099;GO:0030099;GO:0030099;GO:0035511;GO:0045944;GO:0045944;GO:0045944;GO:0046872;GO:0048536;GO:0048872;GO:0051213;GO:0055114;GO:…	K24309	EC:1.14.11.-	S;K;B	12RI9;1CTWK;0UMTM;0V8Q6;09XSP;0IE22;192DN;1B23D;0DJ4P	tet methylcytosine dioxygenase 2 [Source:MGI Symbol;Acc:MGI:2443298]	214133	Q4JK59
ENSMUSG00000029063	6142.16	2439.31	9845	4.03597	2.01292	5.54583e-62	2.35611e-60	4	155646835	155675458	+	3747	Nadk	GO:0000166;GO:0003951;GO:0003951;GO:0003951;GO:0003951;GO:0005524;GO:0005829;GO:0006741;GO:0006741;GO:0006741;GO:0016301;GO:0016310;GO:0016740;GO:0019674;GO:0035774;GO:0046872;GO:0000166;GO:0003951;GO:0003951;GO:0003951;GO:0003951;GO:0003951;GO:0005524;GO:0005829;GO:0006741;GO:0006741;GO:0006741;GO:0006741;GO:0016301;GO:0016310;GO:0016740;GO:0019674;GO:0035774;GO:0035774;GO:0046872;GO:0003951;GO:…	K00858	EC:2.7.1.23	H;G	KOG2178;09XYH;0UJRR;1AVFT;1CW2M;0DM7I;12TFF;18TF6;0V8WA	NAD kinase [Source:MGI Symbol;Acc:MGI:2183149]	192185	P58058;Q3UGI1
ENSMUSG00000029108	1269.1	390.479	2147.71	5.50021	2.45949	5.67492e-62	2.4041e-60	5	57875309	58290572	+	10604	Pcdh7	GO:0005509;GO:0005509;GO:0005515;GO:0005886;GO:0005886;GO:0005886;GO:0005887;GO:0005887;GO:0007155;GO:0007155;GO:0007155;GO:0007156;GO:0016020;GO:0016020;GO:0016021;GO:0005509;GO:0005509;GO:0005515;GO:0005886;GO:0005886;GO:0005887;GO:0005887;GO:0007155;GO:0007155;GO:0007155;GO:0007156;GO:0016020;GO:0016020;GO:0016021;GO:0005509;GO:0005509;GO:0005515;GO:0005886;GO:0005886;GO:0005887;GO:0005887;GO:…	K16498	-	U	0II7Q;0DHV9;12QPB;0V7II;1AVEQ;0UK5I;1CSJX;18YSV;09WJX	protocadherin 7 [Source:MGI Symbol;Acc:MGI:1860487]	54216	A0A0A6YY83;Q3USI1;Q8CA35
ENSMUSG00000017119	1949.21	3233.3	665.123	0.20571	-2.28132	7.5973e-62	3.20938e-60	11	101442975	101472777	+	6871	Nbr1	GO:0000407;GO:0000407;GO:0000407;GO:0005515;GO:0005654;GO:0005654;GO:0005737;GO:0005739;GO:0005739;GO:0005758;GO:0005764;GO:0005770;GO:0005776;GO:0005776;GO:0005829;GO:0005829;GO:0005829;GO:0008270;GO:0016236;GO:0016236;GO:0016236;GO:0016236;GO:0016236;GO:0016604;GO:0016604;GO:0030500;GO:0031410;GO:0031430;GO:0032872;GO:0043130;GO:0043130;GO:0043130;GO:0043130;GO:0043130;GO:0043231;GO:0043231;GO:…	K17987	-	Z;P;L;B	197HH;1BBKC;0E9MK;13GC4;1DGGA;0B6JS;KOG4351;KOG4582;0V3Y9;0WJAM	NBR1, autophagy cargo receptor [Source:MGI Symbol;Acc:MGI:108498]	17966	P97432;Q05BC8;A1L329
ENSMUSG00000021948	14143.4	5854.61	22432.1	3.83153	1.93792	1.00362e-61	4.22767e-60	14	30317311	30348167	-	5544	Prkcd	GO:0000166;GO:0004672;GO:0004672;GO:0004674;GO:0004674;GO:0004674;GO:0004674;GO:0004697;GO:0004697;GO:0004698;GO:0004699;GO:0004715;GO:0005515;GO:0005524;GO:0005524;GO:0005634;GO:0005634;GO:0005737;GO:0005737;GO:0005739;GO:0005739;GO:0005783;GO:0005783;GO:0005829;GO:0005829;GO:0005886;GO:0005886;GO:0005911;GO:0006468;GO:0006468;GO:0006915;GO:0006915;GO:0006979;GO:0007049;GO:0008047;GO:0016020;GO:…	K06068	EC:2.7.11.13	-	-	protein kinase C, delta [Source:MGI Symbol;Acc:MGI:97598]	18753	P28867;Q53YN4
ENSMUSG00000022353	2138.58	3530.77	746.381	0.211393	-2.242	1.30264e-61	5.4718e-60	15	58813083	58953854	-	11345	Mtss1	GO:0003779;GO:0003785;GO:0005102;GO:0007009;GO:0015629;GO:0030036;GO:0042802;GO:0003779;GO:0030036;GO:0003779;GO:0030036;GO:0003779;GO:0007009;GO:0030036;	K20128	-	Z;S	09TS1;192GU;1CPS7;0IGVU;0DF2F;1AVBX;0V4RB;12T1B;0UKA3	MTSS I-BAR domain containing 1 [Source:MGI Symbol;Acc:MGI:2384818]	211401	Q8R1S4;G3X9H7;Q6ZQB7
ENSMUSG00000022831	8816.36	3588.85	14043.9	3.9132	1.96835	2.29709e-61	9.62195e-60	16	36755345	36783574	+	2525	Hcls1	GO:0000122;GO:0001085;GO:0001085;GO:0003779;GO:0005515;GO:0005515;GO:0005515;GO:0005634;GO:0005634;GO:0005634;GO:0005667;GO:0005667;GO:0005737;GO:0005737;GO:0005737;GO:0005739;GO:0005829;GO:0005829;GO:0005884;GO:0005886;GO:0005886;GO:0005886;GO:0008284;GO:0009725;GO:0014068;GO:0014068;GO:0017124;GO:0019901;GO:0019901;GO:0030041;GO:0030218;GO:0030427;GO:0030833;GO:0030833;GO:0030833;GO:0030854;GO:…	K06106	-	Z;B	0IFV2;12STU;0DIR8;09VCP;0V8BW;1CTGA;190QM;0UP8V;1B3BZ	hematopoietic cell specific Lyn substrate 1 [Source:MGI Symbol;Acc:MGI:104568]	15163	P49710;Q8CA06
ENSMUSG00000033705	1918.08	3179.05	657.103	0.206698	-2.2744	3.19358e-61	1.33397e-59	2	120459602	120562376	+	22053	Stard9	GO:0000166;GO:0003777;GO:0003777;GO:0003777;GO:0003777;GO:0005524;GO:0005524;GO:0005634;GO:0005634;GO:0005737;GO:0005737;GO:0005814;GO:0005814;GO:0005856;GO:0005871;GO:0005874;GO:0007018;GO:0007018;GO:0008017;GO:0008017;GO:0008017;GO:0008017;GO:0008289;GO:0008574;GO:0016887;GO:0051225;GO:0051225;GO:0000166;GO:0003774;GO:0003777;GO:0005524;GO:0005524;GO:0005874;GO:0007018;GO:0008017;GO:0008289;	K16491	-	Z	1AXT5;0DF02;0V8TH;KOG0245;0UR98;1CPPU;09Y8U;12QSJ;18UHN	START domain containing 9 [Source:MGI Symbol;Acc:MGI:3045258]	668880	-
ENSMUSG00000037752	616.6	92.4688	1140.73	12.3364	3.62485	5.90125e-61	2.45808e-59	4	132452208	132459857	-	4312	Xkr8	GO:0002513;GO:0003674;GO:0005886;GO:0005886;GO:0005886;GO:0005886;GO:0006915;GO:0016020;GO:0016020;GO:0016021;GO:0016021;GO:0043652;GO:0043652;GO:0043652;GO:0043652;GO:0051649;GO:0070782;GO:0070782;GO:0070782;GO:0070782;GO:1902742;	-	-	S	0DKBX;13MKS;KOG4790;1CV5T;191DX;0V9UG;1ASX4;09YWR;0UP9C	X-linked Kx blood group related 8 [Source:MGI Symbol;Acc:MGI:2685877]	381560	Q8C0T0
ENSMUSG00000096054	1121.87	1915.41	328.341	0.171421	-2.54438	6.54127e-61	2.71709e-59	10	4970917	5501482	-	40491	Syne1	GO:0000932;GO:0003779;GO:0003779;GO:0005521;GO:0005634;GO:0005635;GO:0005640;GO:0005654;GO:0005730;GO:0005737;GO:0005794;GO:0007030;GO:0016020;GO:0016021;GO:0016021;GO:0016021;GO:0019899;GO:0030017;GO:0031965;GO:0034993;GO:0042692;GO:0045211;GO:0090292;GO:0140444;GO:0000932;GO:0002053;GO:0003779;GO:0003779;GO:0005102;GO:0005515;GO:0005515;GO:0005521;GO:0005634;GO:0005635;GO:0005635;GO:0005635;GO:…	K19326	-	Z	1CQAG;09UB4;0UZQ3;0V5A9;12UBG;KOG0516;0DFKT;0IUP1;0W32P;14GAB;0UZDD;1DAPI;0E3GD;0AQJ2	spectrin repeat containing, nuclear envelope 1 [Source:MGI Symbol;Acc:MGI:1927152]	64009	Q6ZWR6;Q6PI72
ENSMUSG00000015846	2079.22	3430.04	728.411	0.212362	-2.2354	7.53636e-61	3.12173e-59	2	27566452	27652969	+	6303	Rxra	GO:0003677;GO:0003700;GO:0005634;GO:0006355;GO:0008270;GO:0043565;GO:0046872;GO:0000122;GO:0000122;GO:0000785;GO:0000785;GO:0000976;GO:0000976;GO:0000977;GO:0000978;GO:0000978;GO:0001162;GO:0001701;GO:0001890;GO:0001893;GO:0001972;GO:0003007;GO:0003677;GO:0003677;GO:0003677;GO:0003690;GO:0003700;GO:0003700;GO:0003707;GO:0004879;GO:0004879;GO:0004879;GO:0005515;GO:0005515;GO:0005515;GO:0005634;GO:…	K08524	-	K	18TMV;1B0V8;0V4Q5;0UN7V;0DF12;09TQV;1CPQX;13HS8;KOG3575	retinoid X receptor alpha [Source:MGI Symbol;Acc:MGI:98214]	20181	P28700;A2AJP1;Q3UMU4
ENSMUSG00000020668	832.869	224.135	1441.6	6.43185	2.68523	9.5917e-61	3.96209e-59	12	3415132	3456494	+	7406	Kif3c	GO:0000166;GO:0003777;GO:0003777;GO:0005515;GO:0005524;GO:0005524;GO:0005737;GO:0005829;GO:0005856;GO:0005871;GO:0005874;GO:0005874;GO:0007018;GO:0007018;GO:0008017;GO:0008017;GO:0008017;GO:0008021;GO:0010976;GO:0015630;GO:0016020;GO:0016887;GO:0019894;GO:0030424;GO:0030425;GO:0030426;GO:0035371;GO:0043025;GO:0071598;GO:0072384;GO:0000166;GO:0003777;GO:0003777;GO:0005515;GO:0005524;GO:0005524;GO:…	K20197	-	Z	0UGHI;0V4YP;12NHW;0DF9P;KOG0240;09TZU;18WID;1AYNS;1CPZA	kinesin family member 3C [Source:MGI Symbol;Acc:MGI:107979]	16570	O35066;Q571A6
ENSMUSG00000034858	270.005	521.956	18.0551	0.0345913	-4.85345	1.21125e-60	4.98956e-59	9	74860166	74939750	+	6637	Fam214a	GO:0003674;GO:0005575;GO:0008150;GO:0003674;GO:0005575;GO:0008150;GO:0003674;GO:0005575;GO:0008150;	-	-	S;U	0UI65;18XR8;1B2GJ;0DIV1;KOG2306;12Q8Z;0V8FK;09XHJ;1CTKC	family with sequence similarity 214, member A [Source:MGI Symbol;Acc:MGI:2387648]	235493	Q69ZK7
ENSMUSG00000027947	1161.81	1977.61	346.013	0.174965	-2.51486	1.42046e-60	5.83522e-59	3	89771366	89820503	-	8642	Il6ra	GO:0004896;GO:0016020;GO:0016020;GO:0016021;GO:0019221;GO:0004896;GO:0004896;GO:0004897;GO:0004897;GO:0004915;GO:0004915;GO:0004915;GO:0004921;GO:0005138;GO:0005138;GO:0005576;GO:0005576;GO:0005576;GO:0005615;GO:0005886;GO:0005896;GO:0005896;GO:0005896;GO:0008284;GO:0008284;GO:0008284;GO:0009897;GO:0010536;GO:0010536;GO:0010573;GO:0010573;GO:0010573;GO:0016020;GO:0016020;GO:0016021;GO:0016324;GO:…	K05055	-	T	0DGFQ;12SI1;09V6Z;0V66G;0UI8S;0II5K;1922H;1CR5C;1ATTG	interleukin 6 receptor, alpha [Source:MGI Symbol;Acc:MGI:105304]	16194	P22272;Q3URV7
ENSMUSG00000020883	802.798	1402.63	202.97	0.144707	-2.78879	1.90557e-60	7.80654e-59	11	97973382	98041229	-	12106	Fbxl20	GO:0001662;GO:0005515;GO:0005737;GO:0019005;GO:0031146;GO:0045202;GO:0098685;GO:0098793;GO:0098978;GO:0099575;GO:2000300;	K10268	-	S;T	09W7V;0V767;KOG4341;0UKHN;1AX9U;0DHGX;12PS1;18Y7I;1CS79	F-box and leucine-rich repeat protein 20 [Source:MGI Symbol;Acc:MGI:1919444]	72194	Q9CZV8
ENSMUSG00000066800	400.877	745.299	56.4541	0.0757469	-3.72267	2.78805e-60	1.13905e-58	1	153625172	153639967	+	6641	Rnasel	GO:0000166;GO:0003723;GO:0003723;GO:0003723;GO:0003723;GO:0004518;GO:0004519;GO:0004540;GO:0004540;GO:0004540;GO:0004672;GO:0005524;GO:0005524;GO:0005737;GO:0005739;GO:0006364;GO:0006396;GO:0006397;GO:0006468;GO:0016363;GO:0016787;GO:0019843;GO:0042802;GO:0043021;GO:0043488;GO:0045071;GO:0045071;GO:0045071;GO:0045444;GO:0045944;GO:0045944;GO:0046326;GO:0046872;GO:0051607;GO:0051607;GO:0051607;GO:…	K01165	-	T;M;K	0V0UR;KOG4177;0AZTQ;14SY9;196Q6;1DCBT;KOG1027;1B9TM;0WCA3;0E5BR	ribonuclease L (2', 5'-oligoisoadenylate synthetase-dependent) [Source:MGI Symbol;Acc:MGI:1098272]	24014	Q05921;B2RQP1
ENSMUSG00000023030	3276.94	1254.09	5299.79	4.22602	2.0793	3.13665e-60	1.27797e-58	15	100285779	100322953	-	6354	Slc11a2	GO:0000041;GO:0001666;GO:0005375;GO:0005375;GO:0005381;GO:0005381;GO:0005384;GO:0005384;GO:0005384;GO:0005506;GO:0005507;GO:0005634;GO:0005634;GO:0005737;GO:0005737;GO:0005739;GO:0005739;GO:0005739;GO:0005741;GO:0005764;GO:0005765;GO:0005765;GO:0005765;GO:0005768;GO:0005768;GO:0005769;GO:0005769;GO:0005769;GO:0005770;GO:0005773;GO:0005773;GO:0005802;GO:0005886;GO:0005886;GO:0005886;GO:0005886;GO:…	K21398	-	P	KOG1291;0UJ4A;1AVZP;18SBU;09VEF;0DGP9;1CRD3;0V6DM;12RF6	solute carrier family 11 (proton-coupled divalent metal ion transporters), member 2 [Source:MGI Symbol;Acc:MGI:1345279]	18174	P49282
ENSMUSG00000036636	5823.85	2356.18	9291.52	3.94347	1.97947	4.73242e-60	1.92288e-58	17	25352365	25381078	+	5291	Clcn7	GO:0005247;GO:0005247;GO:0005654;GO:0006811;GO:0006821;GO:0009268;GO:0016020;GO:0016020;GO:0016021;GO:0031410;GO:0055085;GO:1902476;GO:0000166;GO:0005247;GO:0005247;GO:0005515;GO:0005524;GO:0005654;GO:0005764;GO:0005765;GO:0006811;GO:0006821;GO:0009268;GO:0015108;GO:0015297;GO:0016020;GO:0016020;GO:0016021;GO:0031410;GO:0043231;GO:0055085;GO:1902476;GO:0005247;GO:0006821;GO:0016020;GO:0016020;GO:…	K05016	-	P	1ASKW;KOG0474;0DG85;0UR1I;12SW6;19076;0V91M;1CQXK;09Y45	chloride channel, voltage-sensitive 7 [Source:MGI Symbol;Acc:MGI:1347048]	26373	O70496;Q6RUT9
ENSMUSG00000039747	5504.48	549.217	10459.7	19.0448	4.25133	4.87344e-60	1.9748e-58	5	136176313	136199567	-	6077	Orai2	GO:0002115;GO:0015279;GO:0016020;GO:0016020;GO:0016020;GO:0016021;GO:0030426;GO:0070588;GO:0016020;GO:0016021;GO:0030426;GO:0016020;GO:0016021;	K16057	-	A	0UFQ2;0DHD6;1AZSD;09W46;0V72H;18VJQ;KOG4298;12RK3;1CS3F	ORAI calcium release-activated calcium modulator 2 [Source:MGI Symbol;Acc:MGI:2443195]	269717	Q8BH10;Q14BR6
ENSMUSG00000025888	2822.88	1062	4583.76	4.31617	2.10975	5.08284e-60	2.05407e-58	9	5298508	5307290	+	3136	Casp1	GO:0001666;GO:0001774;GO:0001819;GO:0004175;GO:0004175;GO:0004197;GO:0004197;GO:0004197;GO:0005515;GO:0005515;GO:0005515;GO:0005576;GO:0005634;GO:0005737;GO:0005737;GO:0005737;GO:0005739;GO:0005829;GO:0005886;GO:0006508;GO:0006508;GO:0006508;GO:0006508;GO:0006915;GO:0007520;GO:0007613;GO:0008233;GO:0008233;GO:0008234;GO:0008234;GO:0009617;GO:0010506;GO:0014070;GO:0016020;GO:0016485;GO:0016540;GO:…	K01370	EC:3.4.22.36	D	0VAES;1CVVC;12S0S;0UFW8;0DM0G;18U4W;09WHC;KOG3573;1AZ8D	caspase 1 [Source:MGI Symbol;Acc:MGI:96544]	12362	P29452
ENSMUSG00000031586	559.144	121.642	996.646	8.19324	3.03443	5.95796e-60	2.40122e-58	8	34272671	34419891	-	6556	Rbpms	GO:0000932;GO:0003676;GO:0003713;GO:0003713;GO:0003723;GO:0003723;GO:0003729;GO:0005634;GO:0005654;GO:0005737;GO:0005829;GO:0006979;GO:0006979;GO:0008143;GO:0008143;GO:0010494;GO:0010494;GO:0010862;GO:0010862;GO:0042803;GO:0045893;GO:0060391;GO:0060391;GO:0000932;GO:0003676;GO:0003713;GO:0003713;GO:0003723;GO:0003723;GO:0003729;GO:0005634;GO:0005654;GO:0005737;GO:0005829;GO:0006979;GO:0006979;GO:…	-	-	A;K	0DNY7;1CXVP;0USA9;13HCP;KOG1457;1950Z;0A1AK;1AXYP;0VC6A	RNA binding protein gene with multiple splicing [Source:MGI Symbol;Acc:MGI:1334446]	19663	Q9WVB0
ENSMUSG00000039158	2508.41	925.467	4091.36	4.42086	2.14433	6.01746e-60	2.41866e-58	4	63285362	63321591	-	5765	Akna	GO:0001650;GO:0001650;GO:0001837;GO:0003677;GO:0005515;GO:0005634;GO:0005654;GO:0005654;GO:0005737;GO:0005813;GO:0005813;GO:0005813;GO:0005814;GO:0005829;GO:0005829;GO:0005856;GO:0005874;GO:0007399;GO:0021849;GO:0043231;GO:0043231;GO:0045944;GO:0045944;GO:0050727;GO:0060232;GO:0060234;	K21404	-	K	0IDZE;0DHHH;09W8D;0V76T;0UHN2;18W7Q;1AV6S;13H8V;1CS7S	AT-hook transcription factor [Source:MGI Symbol;Acc:MGI:2140340]	100182	Q80VW7
ENSMUSG00000026893	330.842	44.7112	616.973	13.7991	3.7865	1.10374e-59	4.42446e-58	2	62494629	62524453	+	3409	Gca	GO:0005509;GO:0005509;GO:0005509;GO:0005509;GO:0005737;GO:0005829;GO:0005829;GO:0005886;GO:0005886;GO:0016020;GO:0042803;GO:0042803;GO:0046872;GO:0046982;GO:0046982;	K23923	-	T	0VBCJ;0A0GC;18TIV;0DJJK;0UTA1;1CUCC;KOG0037;12QC6;1B161	grancalcin [Source:MGI Symbol;Acc:MGI:1918521]	227960	Q8VC88
ENSMUSG00000027580	14088.1	1294.5	26881.8	20.7662	4.37617	1.34828e-59	5.39024e-58	2	180869408	180883820	-	11529	Helz2	GO:0000166;GO:0000184;GO:0003677;GO:0003723;GO:0003723;GO:0003724;GO:0004386;GO:0004386;GO:0004540;GO:0005524;GO:0005634;GO:0005654;GO:0005737;GO:0016787;GO:0030374;GO:0030374;GO:0045944;GO:0046872;GO:0090501;GO:0003723;GO:0004386;GO:0004540;GO:0005634;GO:0030374;GO:0030374;GO:0045893;GO:0045944;GO:0090501;GO:0003723;GO:0004386;GO:0004540;GO:0005634;GO:0030374;GO:0045893;GO:0090501;	-	-	A;J;K	12N6M;KOG1804;18VCR;1CPF2;KOG2102;0UFRU;0V4D9;1B371;0DER9;09TE5	helicase with zinc finger 2, transcriptional coactivator [Source:MGI Symbol;Acc:MGI:2385169]	229003	E9QAM5;Q3TZD5
ENSMUSG00000028773	1180.94	217.168	2144.72	9.87584	3.3039	1.53212e-59	6.10883e-58	4	130202388	130209256	+	823	Fabp3	GO:0005324;GO:0005324;GO:0005504;GO:0005504;GO:0005615;GO:0005615;GO:0005615;GO:0005737;GO:0005737;GO:0005737;GO:0005829;GO:0005829;GO:0005829;GO:0006631;GO:0008092;GO:0008092;GO:0008289;GO:0008289;GO:0015909;GO:0015909;GO:0015909;GO:0016528;GO:0016528;GO:0032365;GO:0032868;GO:0036041;GO:0036041;GO:0042493;GO:0042632;GO:0046320;GO:0050543;GO:0050543;GO:0050873;GO:0055091;GO:0070538;GO:0070538;GO:…	K08752	-	I	1D34F;0UV51;0A6SZ;KOG4015;13QJM;0DTSF;1B5SG;0VHKT;1935T	fatty acid binding protein 3, muscle and heart [Source:MGI Symbol;Acc:MGI:95476]	14077	P11404;Q5EBJ0
ENSMUSG00000002111	11735.3	4928.58	18542	3.76213	1.91155	1.82385e-59	7.2526e-58	2	90912735	90946101	+	2695	Spi1	GO:0000122;GO:0000785;GO:0000785;GO:0000785;GO:0000978;GO:0000978;GO:0000978;GO:0000978;GO:0000981;GO:0000981;GO:0000981;GO:0001085;GO:0001227;GO:0001228;GO:0001228;GO:0001944;GO:0002320;GO:0002573;GO:0003677;GO:0003677;GO:0003677;GO:0003700;GO:0003700;GO:0003700;GO:0003700;GO:0003723;GO:0005515;GO:0005515;GO:0005634;GO:0005634;GO:0005634;GO:0005634;GO:0005634;GO:0005634;GO:0005654;GO:0005654;GO:…	K09438	-	K;B	09VH2;0UHQJ;0DGRT;KOG3805;1CRFU;1ATAY;12SKS;0V6GB;1908K	spleen focus forming virus (SFFV) proviral integration oncogene [Source:MGI Symbol;Acc:MGI:98282]	20375	P17433;Q3U5L4
ENSMUSG00000054717	744.781	193.725	1295.84	6.68907	2.74181	1.96676e-59	7.8001e-58	8	57964941	57969033	+	3003	Hmgb2	GO:0000785;GO:0000785;GO:0000793;GO:0000793;GO:0000793;GO:0000976;GO:0000976;GO:0000987;GO:0001938;GO:0001938;GO:0002376;GO:0002437;GO:0003677;GO:0003677;GO:0003677;GO:0003677;GO:0003677;GO:0003684;GO:0003684;GO:0003690;GO:0003690;GO:0003713;GO:0003713;GO:0005515;GO:0005576;GO:0005615;GO:0005615;GO:0005615;GO:0005634;GO:0005634;GO:0005634;GO:0005634;GO:0005634;GO:0005654;GO:0005654;GO:0005694;GO:…	K11295	-	K;B	0UGBY;09Z4C;KOG0381;0DF62;0VDMV;194UU;12T0N;1ARPK;1CPVN	high mobility group box 2 [Source:MGI Symbol;Acc:MGI:96157]	97165	P30681
ENSMUSG00000021322	2202.79	387.877	4017.71	10.3582	3.3727	2.80602e-59	1.10991e-57	13	20978283	21220787	+	5925	Aoah	GO:0005509;GO:0005509;GO:0005509;GO:0005576;GO:0006629;GO:0006631;GO:0006631;GO:0008653;GO:0009104;GO:0009104;GO:0009104;GO:0016787;GO:0016788;GO:0031410;GO:0046872;GO:0050528;GO:0050528;GO:0050528;GO:0050528;GO:0050728;GO:0050728;GO:0005576;GO:0050528;	K01065	EC:3.1.1.77	I;G	0DS4E;0UFT3;13ITJ;1AX2T;1CW3J;0VFGR;18T4G;0A4MI;0IFCC	acyloxyacyl hydrolase [Source:MGI Symbol;Acc:MGI:1350928]	27052	O35298
ENSMUSG00000000078	14351.5	6080.2	22622.9	3.72075	1.89559	3.49631e-59	1.37929e-57	13	5911481	5920393	+	4391	Klf6	GO:0000978;GO:0001228;GO:0001650;GO:0005654;GO:0005730;GO:0005829;GO:0043231;GO:0045944;GO:1990837;	K09207	-	K	1CUAB;18TAS;1AUQ5;13HQY;0UI48;KOG1721;09Y7Z;0DJHW;0V95K	Kruppel-like factor 6 [Source:MGI Symbol;Acc:MGI:1346318]	23849	Q8BPQ2
ENSMUSG00000052609	355.548	666.737	44.3593	0.0665319	-3.90981	5.62196e-59	2.212e-57	12	76577665	76627262	+	11727	Plekhg3	GO:0005085;GO:0005085;GO:0005575;GO:0050790;GO:0005085;GO:0005085;GO:0005575;GO:0050790;GO:0005085;GO:0050790;	K23859	-	T	1909Z;12PE9;09VAB;0V69K;0DGIP;1CR8G;KOG3518;0UICI;1B05A	pleckstrin homology domain containing, family G (with RhoGef domain) member 3 [Source:MGI Symbol;Acc:MGI:2388284]	263406	Q4VAC9
ENSMUSG00000047098	1423.95	450.46	2397.45	5.32223	2.41203	1.00885e-58	3.95894e-57	14	55829165	55841150	+	5734	Rnf31	GO:0000209;GO:0000209;GO:0004842;GO:0004842;GO:0004842;GO:0005515;GO:0005515;GO:0005737;GO:0005829;GO:0009898;GO:0009898;GO:0016567;GO:0016740;GO:0023035;GO:0031625;GO:0035631;GO:0042802;GO:0043123;GO:0043123;GO:0043123;GO:0043130;GO:0043130;GO:0046872;GO:0050852;GO:0050852;GO:0051092;GO:0051092;GO:0060546;GO:0071797;GO:0071797;GO:0071797;GO:0097039;GO:0097039;GO:0004842;GO:0016567;GO:0016740;GO:…	K11974	EC:2.3.2.31	O	0V9SQ;09YUV;KOG1812;18Z68;0UQXX;13HGC;0DIDS;1B0P8;1CV3M	ring finger protein 31 [Source:MGI Symbol;Acc:MGI:1934704]	268749	Q924T7
ENSMUSG00000023150	1326.44	2260.77	392.101	0.173437	-2.52752	1.36351e-58	5.33664e-57	1	151220228	151240173	+	5435	Ivns1abp	GO:0005515;GO:0005634;GO:0005634;GO:0005737;GO:0005829;GO:0005829;GO:0005856;GO:0008380;GO:0008380;GO:0009615;GO:0009615;GO:0031397;GO:0031397;GO:0031397;GO:2001243;GO:0005515;GO:0005634;GO:0005634;GO:0005737;GO:0005829;GO:0005856;GO:0008380;GO:0009615;GO:0031397;GO:0031397;GO:2001243;GO:0005515;GO:0005634;GO:0005634;GO:0005737;GO:0005829;GO:0005856;GO:0008380;GO:0009615;GO:0031397;GO:0031397;GO:…	K15046	-	T	0V9KK;1CUX4;0DK3C;18TH6;1B3QI;12RBM;09YNX;0UP04;KOG4441	influenza virus NS1A binding protein [Source:MGI Symbol;Acc:MGI:2152389]	117198	Q920Q8
ENSMUSG00000031431	395.757	733.644	57.8696	0.0788796	-3.6642	1.74261e-58	6.80257e-57	X	139440277	139501408	-	4341	Tsc22d3	GO:0000122;GO:0005634;GO:0005634;GO:0005737;GO:0005737;GO:0006357;GO:0006970;GO:0043426;GO:0048642;GO:0070236;GO:0005515;GO:0005634;GO:0005634;GO:0005737;GO:0006357;GO:0006970;GO:0070236;GO:0006357;	-	-	K	0V3EF;0WHUH;1DFP2;0B57Y;0E8RZ;1BB76;0IRR1;13EBV	TSC22 domain family, member 3 [Source:MGI Symbol;Acc:MGI:1196284]	14605	Q9Z2S7
ENSMUSG00000022895	6701.75	339.047	13064.5	38.5329	5.26802	1.7597e-58	6.85134e-57	16	95502942	95522095	+	5780	Ets2	GO:0000122;GO:0000977;GO:0000978;GO:0000981;GO:0001227;GO:0001712;GO:0003677;GO:0003677;GO:0003677;GO:0003700;GO:0003700;GO:0005634;GO:0005634;GO:0005654;GO:0005829;GO:0005886;GO:0006355;GO:0006357;GO:0007498;GO:0019904;GO:0030154;GO:0035259;GO:0035259;GO:0043565;GO:0043565;GO:0045893;GO:0045944;GO:0045944;GO:0090009;GO:1990837;GO:0043565;	K21932	-	K	13IAS;09TSZ;191I0;KOG3806;1CPT4;0UG8N;0DF3A;0V4SB;1AX27	E26 avian leukemia oncogene 2, 3' domain [Source:MGI Symbol;Acc:MGI:95456]	23872	P15037;Q3UP99
ENSMUSG00000025076	778.031	211.198	1344.86	6.36777	2.67079	1.95949e-58	7.60934e-57	19	56385561	56430776	+	4403	Casp7	GO:0004190;GO:0004197;GO:0004197;GO:0005515;GO:0005634;GO:0005737;GO:0005737;GO:0005829;GO:0005829;GO:0006508;GO:0006508;GO:0006508;GO:0006508;GO:0006915;GO:0006915;GO:0006915;GO:0007507;GO:0007568;GO:0008233;GO:0008233;GO:0008234;GO:0008234;GO:0008234;GO:0008234;GO:0009411;GO:0016485;GO:0016787;GO:0043231;GO:0043231;GO:0051146;GO:0051402;GO:0071887;GO:0072734;GO:0097153;GO:0097153;GO:0097194;GO:…	K04397	EC:3.4.22.60	D	1CS2Z;13KPR;0DMAH;09ZPU;0VE4P;0UI80;1ATSV;18USP;KOG3573	caspase 7 [Source:MGI Symbol;Acc:MGI:109383]	12369	P97864;Q4FJQ4
ENSMUSG00000037921	892.578	129.874	1655.28	12.7453	3.67189	2.29652e-58	8.89499e-57	8	62381121	62491278	+	8684	Ddx60	GO:0003690;GO:0003723;GO:0003725;GO:0003727;GO:0005515;GO:0005737;GO:0005829;GO:0009615;GO:0045111;GO:0051607;GO:1900245;GO:1900246;GO:0003690;GO:0003723;GO:0003725;GO:0003727;GO:0005515;GO:0005737;GO:0005829;GO:0009615;GO:0045111;GO:0051607;GO:1900245;GO:1900246;GO:0000166;GO:0003676;GO:0003690;GO:0003723;GO:0003725;GO:0003727;GO:0005515;GO:0005524;GO:0005524;GO:0005737;GO:0005829;GO:0009615;GO:…	K20103	EC:3.6.4.13	A	KOG0949;KOG0948;0UMKZ;1AX3N;0A0C4;12SQZ;0DIYN;0V75Y;18XMV;1CTQ4	DExD/H box helicase 60 [Source:MGI Symbol;Acc:MGI:2384570]	234311	G3X9F7
ENSMUSG00000052512	1285.6	2161.07	410.119	0.189776	-2.39763	2.46479e-58	9.52201e-57	7	48558464	49259838	+	32228	Nav2	GO:0003025;GO:0005614;GO:0005654;GO:0007399;GO:0007399;GO:0007605;GO:0007608;GO:0007626;GO:0008201;GO:0021554;GO:0021563;GO:0021564;GO:0021695;GO:0022008;GO:0031012;GO:0003025;GO:0005614;GO:0005654;GO:0005654;GO:0007399;GO:0007399;GO:0007399;GO:0007605;GO:0007608;GO:0007626;GO:0008201;GO:0021554;GO:0021563;GO:0021564;GO:0022008;GO:0031012;GO:0003025;GO:0005614;GO:0005654;GO:0007399;GO:0007399;GO:…	K19483	EC:3.6.4.12	Z	1916F;0DMIN;12SYF;1CWDU;0UGQ6;0V7DJ;0IGVF;1B0NJ;09ZZ4	neuron navigator 2 [Source:MGI Symbol;Acc:MGI:2183691]	78286	Q8BYE8;Q6ZPE7;Q8BJG0;V9GXT3
ENSMUSG00000022272	5965.42	1963.88	9966.97	5.07515	2.34345	4.65173e-58	1.79242e-56	15	25622611	25813759	+	10122	Myo10	GO:0000166;GO:0001726;GO:0001726;GO:0003774;GO:0003779;GO:0005515;GO:0005516;GO:0005524;GO:0005524;GO:0005547;GO:0005730;GO:0005730;GO:0005737;GO:0005829;GO:0005829;GO:0005829;GO:0005856;GO:0005856;GO:0005886;GO:0005886;GO:0005886;GO:0005938;GO:0008360;GO:0008360;GO:0016020;GO:0016459;GO:0016459;GO:0022409;GO:0030027;GO:0030027;GO:0030175;GO:0030507;GO:0030705;GO:0030898;GO:0031527;GO:0032433;GO:…	K12559	-	Z	1CSXV;0V4MW;1B56K;0UUKB;12NAI;KOG4229;09TNR;18T82;0DJTZ	myosin X [Source:MGI Symbol;Acc:MGI:107716]	17909	F8VQB6;Q80TR9
ENSMUSG00000026170	642.424	1135.33	149.524	0.131701	-2.92466	1.24147e-57	4.77132e-56	1	74752733	74777051	+	2173	Cyp27a1	GO:0004497;GO:0005506;GO:0005739;GO:0005739;GO:0005739;GO:0005740;GO:0005743;GO:0005743;GO:0006629;GO:0006694;GO:0006699;GO:0006699;GO:0006699;GO:0006700;GO:0006707;GO:0006707;GO:0006707;GO:0008123;GO:0008202;GO:0008203;GO:0008203;GO:0008203;GO:0008386;GO:0016020;GO:0016491;GO:0016705;GO:0020037;GO:0020037;GO:0020037;GO:0020037;GO:0030343;GO:0030343;GO:0030343;GO:0030343;GO:0030544;GO:0030544;GO:…	K00488	EC:1.14.15.15	Q	1ARXH;0DGWI;09W4E;0V72R;12SBQ;1CRKT;KOG0159;18XXX;0UIUQ	cytochrome P450, family 27, subfamily a, polypeptide 1 [Source:MGI Symbol;Acc:MGI:88594]	104086	Q9DBG1
ENSMUSG00000040479	4353.06	6945.01	1761.12	0.25358	-1.97949	1.54774e-57	5.93314e-56	2	91763169	91806209	-	6270	Dgkz	GO:0000166;GO:0004143;GO:0005524;GO:0007165;GO:0016301;GO:0016310;GO:0016740;GO:0000166;GO:0003951;GO:0004143;GO:0004143;GO:0005524;GO:0007165;GO:0007205;GO:0016301;GO:0016301;GO:0016310;GO:0016740;GO:0035556;GO:0046486;GO:0000166;GO:0001727;GO:0003951;GO:0004143;GO:0004143;GO:0004143;GO:0004143;GO:0004857;GO:0005515;GO:0005515;GO:0005524;GO:0005634;GO:0005634;GO:0005634;GO:0005737;GO:0005829;GO:…	K00901	EC:2.7.1.107	T;I	0V5GI;KOG0782;09W8Z;0DHIA;0UJQM;18W1X;1AU5A;1CS8I;12PSP	diacylglycerol kinase zeta [Source:MGI Symbol;Acc:MGI:1278339]	104418	Q80UP3
ENSMUSG00000022867	5105.91	2091.49	8120.32	3.88256	1.95701	1.56945e-57	6.00092e-56	16	76810594	76913668	+	5411	Usp25	GO:0004843;GO:0004843;GO:0005783;GO:0005829;GO:0006508;GO:0006511;GO:0008233;GO:0008234;GO:0016579;GO:0016579;GO:0016787;GO:0018215;GO:0031625;GO:0032183;GO:0051117;GO:0070536;GO:0071108;GO:1904293;GO:0000502;GO:0004197;GO:0004843;GO:0004843;GO:0004843;GO:0004843;GO:0005634;GO:0005634;GO:0005737;GO:0005783;GO:0005829;GO:0005829;GO:0006508;GO:0006511;GO:0006511;GO:0008233;GO:0008234;GO:0016579;GO:…	K11849	EC:3.4.19.12	O	KOG1863;0UP7E;1CQUB;1AZ8I;0DG4S;0V5UX;12NZ2;194WI;09UVA	ubiquitin specific peptidase 25 [Source:MGI Symbol;Acc:MGI:1353655]	30940	P57080
ENSMUSG00000027613	2381.94	901.66	3862.22	4.28346	2.09878	3.12187e-57	1.19062e-55	2	155661752	155668845	-	2702	Eif6	GO:0000054;GO:0000054;GO:0000460;GO:0000470;GO:0003743;GO:0005634;GO:0005634;GO:0005634;GO:0005638;GO:0005654;GO:0005654;GO:0005730;GO:0005730;GO:0005737;GO:0005737;GO:0005737;GO:0005829;GO:0005882;GO:0006110;GO:0006412;GO:0006413;GO:0030687;GO:0032868;GO:0035195;GO:0035195;GO:0035195;GO:0035278;GO:0035278;GO:0035278;GO:0042254;GO:0042256;GO:0042256;GO:0042256;GO:0042256;GO:0042273;GO:0042304;GO:…	K03264	-	J	KOG3185;0DKY3;1AZT5;0UQU0;19209;12NJZ;09ZFI;1CVT3;0V7M2	eukaryotic translation initiation factor 6 [Source:MGI Symbol;Acc:MGI:1196288]	16418	O55135;Q545K4
ENSMUSG00000031652	2275.03	854.283	3695.77	4.32617	2.11309	4.02352e-57	1.53058e-55	8	87534788	87611886	-	12189	N4bp1	GO:0003723;GO:0005515;GO:0005515;GO:0005634;GO:0005634;GO:0005634;GO:0005730;GO:0016605;GO:0016605;GO:0031397;GO:0031397;GO:0032435;GO:0032435;GO:0034644;GO:0034644;GO:0034644;	-	-	S;K	0UN4N;1925U;12PAJ;0DGR1;KOG3777;1CRF0;0V6FF;09U6A;1AYJ3	NEDD4 binding protein 1 [Source:MGI Symbol;Acc:MGI:2136825]	80750	Q6A037;Q5EBQ4
ENSMUSG00000074794	424.847	779.274	70.4195	0.0903656	-3.46808	5.95341e-57	2.25896e-55	13	81031503	81044161	+	6266	Arrdc3	GO:0001659;GO:0005737;GO:0005737;GO:0005764;GO:0005768;GO:0005768;GO:0005768;GO:0005768;GO:0005769;GO:0005886;GO:0005886;GO:0005886;GO:0005886;GO:0015031;GO:0016020;GO:0031651;GO:0031699;GO:0031699;GO:0043588;GO:0051443;GO:0051443;GO:0060613;GO:0071878;GO:0090327;GO:0120163;	-	-	S;T;C	KOG3780;13HFT;1952J;1CQ52;09Z9K;0DFFA;0UR8U;0VA6T;1B08W	arrestin domain containing 3 [Source:MGI Symbol;Acc:MGI:2145242]	105171	Q7TPQ9
ENSMUSG00000007655	5487.86	643.236	10332.5	16.0633	4.0057	7.47756e-57	2.83009e-55	6	17306334	17341451	+	3444	Cav1	GO:0000122;GO:0000139;GO:0000139;GO:0000139;GO:0000139;GO:0000149;GO:0000188;GO:0001525;GO:0001570;GO:0001666;GO:0001937;GO:0001937;GO:0001938;GO:0001960;GO:0002026;GO:0002080;GO:0002095;GO:0002931;GO:0003057;GO:0005102;GO:0005102;GO:0005515;GO:0005515;GO:0005515;GO:0005737;GO:0005739;GO:0005768;GO:0005768;GO:0005768;GO:0005778;GO:0005783;GO:0005783;GO:0005783;GO:0005794;GO:0005794;GO:0005794;GO:…	K06278	-	T;V	0IV7A;0A3GD;0VEBF;13KXN;1B1ZN;0DR3M;0UU92;1D08I;194HN	caveolin 1, caveolae protein [Source:MGI Symbol;Acc:MGI:102709]	12389	P49817
ENSMUSG00000027339	1475.54	2449.54	501.532	0.204745	-2.2881	9.81177e-57	3.70413e-55	2	131831335	131872178	-	11993	Rassf2	GO:0000775;GO:0000776;GO:0000776;GO:0000776;GO:0000777;GO:0001501;GO:0001503;GO:0004672;GO:0004672;GO:0005515;GO:0005634;GO:0005634;GO:0005634;GO:0005634;GO:0005654;GO:0005654;GO:0005694;GO:0005737;GO:0005737;GO:0005737;GO:0005737;GO:0005794;GO:0005794;GO:0005829;GO:0005829;GO:0005886;GO:0005886;GO:0006468;GO:0007049;GO:0007165;GO:0007165;GO:0031954;GO:0031954;GO:0032991;GO:0032991;GO:0033137;GO:…	K09851	-	T	KOG4239;09TW5;1CPW3;18SUS;0DF6H;0V4VB;0UGCQ;12N95;1AS54	Ras association (RalGDS/AF-6) domain family member 2 [Source:MGI Symbol;Acc:MGI:2442060]	215653	Q8BMS9
ENSMUSG00000038024	2746.12	4428.46	1063.78	0.240215	-2.0576	2.16262e-56	8.14367e-55	4	86666792	86768840	+	8482	Dennd4c	GO:0005085;GO:0005085;GO:0005085;GO:0005085;GO:0005737;GO:0005794;GO:0005794;GO:0005829;GO:0005829;GO:0005829;GO:0005886;GO:0015031;GO:0016020;GO:0030659;GO:0030904;GO:0031410;GO:0031410;GO:0032483;GO:0032593;GO:0032869;GO:0043231;GO:0043231;GO:0050790;GO:0072659;GO:0005085;GO:0050790;GO:0005085;GO:0005085;GO:0005085;GO:0005737;GO:0005794;GO:0005829;GO:0005829;GO:0005886;GO:0015031;GO:0016020;GO:…	K20163	-	T;U	194P6;12NIB;1AW3B;0DI96;09WYM;0UT5B;1CSZN;KOG2127;0V534	DENN/MADD domain containing 4C [Source:MGI Symbol;Acc:MGI:1914769]	329877	A6H8H2
ENSMUSG00000000149	3085.91	4950.57	1221.26	0.24669	-2.01923	5.53365e-56	2.07854e-54	5	140744163	140816186	-	3416	Gna12	GO:0000166;GO:0001664;GO:0001664;GO:0001701;GO:0003924;GO:0003924;GO:0003924;GO:0005525;GO:0005737;GO:0005834;GO:0005834;GO:0005886;GO:0007165;GO:0007165;GO:0007186;GO:0007186;GO:0007188;GO:0007266;GO:0007266;GO:0007266;GO:0008360;GO:0010762;GO:0016020;GO:0016328;GO:0019001;GO:0030154;GO:0031526;GO:0031526;GO:0031526;GO:0031683;GO:0031683;GO:0031752;GO:0031752;GO:0031752;GO:0032006;GO:0032006;GO:…	K04346	-	T;D	0UFGJ;09X7M;1ARD8;1CP7W;KOG0082;0DEI3;13IT4;0V867;18Y9N	guanine nucleotide binding protein, alpha 12 [Source:MGI Symbol;Acc:MGI:95767]	14673	P27600
ENSMUSG00000064246	13329	39.7387	26618.3	669.833	9.38766	8.14641e-56	3.05224e-54	1	134109914	134117919	+	2804	Chil1	GO:0005515;GO:0005576;GO:0005576;GO:0005615;GO:0005615;GO:0005615;GO:0005737;GO:0005783;GO:0005975;GO:0006032;GO:0006915;GO:0006954;GO:0007250;GO:0008061;GO:0008061;GO:0008061;GO:0008061;GO:0009612;GO:0010800;GO:0030324;GO:0030324;GO:0032637;GO:0034612;GO:0045766;GO:0045766;GO:0045766;GO:0051897;GO:0051897;GO:0070374;GO:0070374;GO:0070555;GO:0070741;GO:0071356;GO:0005515;GO:0005576;GO:0005576;GO:…	K17523	-	W;G	0V4N2;0DF5I;1B0U6;18Y04;0URHV;09TNW;KOG2806;12QHY;1CPV6	chitinase-like 1 [Source:MGI Symbol;Acc:MGI:1340899]	12654	Q61362
ENSMUSG00000024404	6121.54	2590.3	9652.79	3.72652	1.89783	9.44228e-56	3.5289e-54	18	12261798	12290444	+	10963	Riok3	GO:0000166;GO:0002376;GO:0004674;GO:0004674;GO:0004674;GO:0004674;GO:0004674;GO:0005524;GO:0005524;GO:0005737;GO:0005829;GO:0006468;GO:0016301;GO:0016310;GO:0016740;GO:0030490;GO:0030490;GO:0030490;GO:0030688;GO:0030688;GO:0030688;GO:0031333;GO:0031333;GO:0032728;GO:0032728;GO:0039534;GO:0039534;GO:0042254;GO:0043124;GO:0043124;GO:0045087;GO:0045089;GO:0045089;GO:0046872;GO:0051607;GO:0071359;GO:…	K08872	EC:2.7.11.1	T	KOG2269;133R2;0VDK4;0A2QC;0DQBX;1AVIQ;18WJ7;0USZD;1CZDZ	RIO kinase 3 [Source:MGI Symbol;Acc:MGI:1914128]	66878	Q9DBU3
ENSMUSG00000057315	588.202	1042.54	133.864	0.128402	-2.96126	1.00668e-55	3.75291e-54	5	102629257	103045803	+	8792	Arhgap24	GO:0005096;GO:0007165;GO:0043547;GO:0001525;GO:0005096;GO:0005096;GO:0005096;GO:0005737;GO:0005856;GO:0005912;GO:0005925;GO:0005925;GO:0005925;GO:0007165;GO:0007275;GO:0030054;GO:0030154;GO:0035021;GO:0035021;GO:0035313;GO:0035313;GO:0042995;GO:0090630;GO:0090630;GO:1900028;GO:1900028;GO:0001525;GO:0005096;GO:0005096;GO:0005096;GO:0005737;GO:0005856;GO:0005912;GO:0005925;GO:0005925;GO:0005925;GO:…	K20642	-	T	0DGF5;18V6A;KOG4270;09V69;0V65V;1AXZS;12P56;0UI84;1CR4U	Rho GTPase activating protein 24 [Source:MGI Symbol;Acc:MGI:1922647]	231532	Q8C4V1;G3X9N1;Q8BHH3
ENSMUSG00000021591	2875.87	1134.38	4617.36	4.07037	2.02516	1.48111e-55	5.50783e-54	13	75987987	75998273	+	5494	Glrx	GO:0005634;GO:0005737;GO:0005737;GO:0005739;GO:0005758;GO:0005829;GO:0009055;GO:0015035;GO:0015038;GO:0019153;GO:0022900;GO:0030425;GO:0032024;GO:0043025;GO:0045838;GO:0045838;GO:0045921;GO:0047485;GO:0047485;GO:0055114;GO:0060355;GO:0071392;GO:1901224;GO:1901299;GO:2000587;GO:2000651;GO:2000651;GO:0005634;GO:0005737;GO:0005737;GO:0005739;GO:0005758;GO:0005829;GO:0009055;GO:0015035;GO:0015038;GO:…	K03676	-	O	193P6;0VJ4D;1D45U;0A88Q;1B67R;13W1I;0DUUX;0UVST;KOG1752	glutaredoxin [Source:MGI Symbol;Acc:MGI:2135625]	93692	Q9QUH0;Q3U6L3
ENSMUSG00000020190	1616.61	2967.93	265.28	0.0893822	-3.48387	3.50901e-55	1.30165e-53	10	80501161	80513946	-	3892	Mknk2	GO:0000166;GO:0004672;GO:0004674;GO:0004674;GO:0004674;GO:0004683;GO:0005515;GO:0005516;GO:0005524;GO:0005524;GO:0005524;GO:0005524;GO:0005634;GO:0005634;GO:0005654;GO:0005654;GO:0005737;GO:0005737;GO:0006417;GO:0006468;GO:0006468;GO:0006468;GO:0006468;GO:0006915;GO:0009931;GO:0016301;GO:0016310;GO:0016604;GO:0016604;GO:0016605;GO:0016740;GO:0018105;GO:0030097;GO:0030097;GO:0035556;GO:0035556;GO:…	K04372	EC:2.7.11.1	T	0DQME;0V4QQ;KOG0607;1AUY7;09TRD;1CZV2;0UP54;194ED;12NBZ	MAP kinase-interacting serine/threonine kinase 2 [Source:MGI Symbol;Acc:MGI:894279]	17347	Q8CDB0;Q3TPM2
ENSMUSG00000022529	4154.31	1096.06	7212.55	6.58042	2.71818	3.56649e-55	1.31969e-53	16	3561957	3568654	+	4521	Zfp263	GO:0000122;GO:0000122;GO:0000785;GO:0000978;GO:0000981;GO:0001227;GO:0001227;GO:0003677;GO:0005634;GO:0006355;GO:0006357;GO:0043565;GO:0043565;GO:0045944;GO:0045944;GO:0046872;GO:1990837;GO:1990837;GO:0000122;GO:0000785;GO:0000978;GO:0000981;GO:0001227;GO:0005634;GO:0006357;GO:0043565;GO:1990837;GO:0000122;GO:0000785;GO:0000978;GO:0000981;GO:0001227;GO:0006357;GO:0043565;GO:1990837;	K09229	-	K	1CW8C;0VAR7;0DMD3;18SKB;1B54A;KOG1721;13KP2;0UQJ5;09ZUN	zinc finger protein 263 [Source:MGI Symbol;Acc:MGI:1921370]	74120	Q8CF60
ENSMUSG00000029217	988.109	1675.51	300.709	0.179473	-2.47816	5.01319e-55	1.85041e-53	5	72913059	73025826	-	3744	Tec	GO:0000166;GO:0002250;GO:0002376;GO:0004672;GO:0004713;GO:0004713;GO:0004715;GO:0004715;GO:0005524;GO:0005524;GO:0005856;GO:0005886;GO:0006468;GO:0007229;GO:0010543;GO:0016301;GO:0016310;GO:0016740;GO:0018108;GO:0035556;GO:0038083;GO:0042246;GO:0046872;GO:0050731;GO:0050853;GO:0000166;GO:0002250;GO:0002376;GO:0004672;GO:0004713;GO:0004713;GO:0004715;GO:0005524;GO:0005524;GO:0006468;GO:0016301;GO:…	K07364	EC:2.7.10.2	T	195ID;0V4AE;0UK02;1B3TN;12TTS;1CRCG;KOG0197;09VT7;0DH1H	tec protein tyrosine kinase [Source:MGI Symbol;Acc:MGI:98662]	21682	P24604;Q3U436;Q3TH41
ENSMUSG00000025337	2485.18	971.734	3998.62	4.11494	2.04087	6.73643e-55	2.48034e-53	5	130274572	130284371	-	2033	Sbds	GO:0000922;GO:0000922;GO:0000922;GO:0001833;GO:0002244;GO:0002244;GO:0002244;GO:0005634;GO:0005634;GO:0005634;GO:0005654;GO:0005654;GO:0005654;GO:0005730;GO:0005730;GO:0005730;GO:0005737;GO:0005737;GO:0005737;GO:0005819;GO:0005829;GO:0005829;GO:0005856;GO:0006364;GO:0006364;GO:0007052;GO:0007052;GO:0008017;GO:0008017;GO:0019843;GO:0019843;GO:0030282;GO:0030282;GO:0030595;GO:0030595;GO:0042254;GO:…	K14574	-	J	0V7P0;KOG2917;1B312;0UKCI;12PHJ;1CSR1;0DI0A;09WQH;18YBM	SBDS ribosome maturation factor [Source:MGI Symbol;Acc:MGI:1913961]	66711	P70122
ENSMUSG00000066682	342.884	28.4881	657.279	23.0721	4.52808	7.05035e-55	2.58953e-53	5	137864089	137870077	-	1957	Pilrb2	GO:0016020;GO:0016021;GO:0016020;GO:0016021;GO:0016020;GO:0016021;GO:0042288;	K15411	-	T	13Q66;1D2XQ;0A6ZA;0IW80;0VHUD;0DTQH;0UV2T	paired immunoglobin-like type 2 receptor beta 2 [Source:MGI Symbol;Acc:MGI:2450535]	545812	-
ENSMUSG00000034652	3435.23	5474.04	1396.42	0.255098	-1.97088	7.25166e-55	2.65692e-53	11	114780867	114795480	+	4738	Cd300a	GO:0001786;GO:0002376;GO:0002552;GO:0004888;GO:0005515;GO:0005886;GO:0005886;GO:0005886;GO:0006898;GO:0008429;GO:0014063;GO:0016020;GO:0016020;GO:0016021;GO:0019902;GO:0030889;GO:0032516;GO:0033007;GO:0034125;GO:0038023;GO:0043305;GO:0043407;GO:0048147;GO:0050856;GO:0050859;GO:0051134;GO:0060101;GO:1902564;GO:1902567;GO:1902569;GO:2000417;GO:0001786;GO:0002376;GO:0002552;GO:0004888;GO:0005515;GO:…	K06719	-	W;T	0UUCQ;0A6XP;0VHRZ;0DRFK;13SFX;1D0MW;1B51H;0IXT8;1963P	CD300A molecule [Source:MGI Symbol;Acc:MGI:2443411]	217303	Q6SJQ0
ENSMUSG00000036833	2672.25	4412.65	931.854	0.211178	-2.24347	8.44243e-55	3.08563e-53	2	24866045	24944069	+	7496	Pnpla7	GO:0004622;GO:0004622;GO:0004622;GO:0004622;GO:0005783;GO:0005783;GO:0005783;GO:0005789;GO:0005789;GO:0005811;GO:0006629;GO:0006629;GO:0016020;GO:0016021;GO:0016042;GO:0016787;GO:0034638;GO:0052689;GO:0102545;GO:0016020;GO:0016021;GO:0016020;GO:0016021;	K14676	EC:3.1.1.5	O;I	0UPTC;KOG2968;12S4D;190SS;09VN1;1CU97;1AXUC;0DJGR;0V917	patatin-like phospholipase domain containing 7 [Source:MGI Symbol;Acc:MGI:2385325]	241274	A2AJ88
ENSMUSG00000029840	17041.4	7576.51	26506.2	3.49847	1.80673	9.03051e-55	3.29249e-53	6	35485841	35516823	-	3960	Mtpn	GO:0005634;GO:0005634;GO:0005634;GO:0005634;GO:0005737;GO:0005737;GO:0005737;GO:0005737;GO:0005829;GO:0005829;GO:0005829;GO:0006584;GO:0008290;GO:0008290;GO:0008361;GO:0008361;GO:0010557;GO:0010557;GO:0010557;GO:0010613;GO:0010613;GO:0010613;GO:0010613;GO:0021707;GO:0030307;GO:0030307;GO:0030307;GO:0030424;GO:0030424;GO:0043403;GO:0043565;GO:0043565;GO:0048471;GO:0051092;GO:0051092;GO:0051092;GO:…	-	-	K	1B65N;1D3HD;0A7W1;13SWY;0UV7B;0VJP7;0DU38;KOG4214;193BQ	myotrophin [Source:MGI Symbol;Acc:MGI:99445]	14489	P62774
ENSMUSG00000028630	1453.32	514.382	2392.27	4.65075	2.21746	1.04254e-54	3.79179e-53	10	118691508	118706114	-	6251	Dyrk2	GO:0000151;GO:0000151;GO:0000166;GO:0000287;GO:0000287;GO:0000287;GO:0004672;GO:0004674;GO:0004674;GO:0004674;GO:0004674;GO:0004712;GO:0004713;GO:0004713;GO:0004713;GO:0005524;GO:0005524;GO:0005524;GO:0005524;GO:0005634;GO:0005634;GO:0005634;GO:0005634;GO:0005654;GO:0005654;GO:0005737;GO:0005737;GO:0005737;GO:0005737;GO:0005829;GO:0005829;GO:0005856;GO:0006468;GO:0006468;GO:0006468;GO:0006468;GO:…	K18669	EC:2.7.12.1	T	0DG5U;09UWE;1B1K2;12NPP;KOG0667;0UHTU;1CQVE;1910M;0V5W3	dual-specificity tyrosine-(Y)-phosphorylation regulated kinase 2 [Source:MGI Symbol;Acc:MGI:1330301]	69181	Q5U4C9
ENSMUSG00000038866	1985.38	689.231	3281.54	4.76115	2.25131	1.17898e-54	4.27762e-53	1	105918136	105961804	+	6774	Zcchc2	GO:0003674;GO:0003676;GO:0005737;GO:0005737;GO:0008150;GO:0008270;GO:0035091;GO:0046872;GO:0003674;GO:0003676;GO:0005737;GO:0008150;GO:0008270;GO:0035091;GO:0046872;GO:0003676;GO:0008270;GO:0035091;	K22700	-	S;J;O;T	0A0WN;1CXF6;0IZZC;192BR;0URV6;0VBT4;12U3N;0DNHU;1AZ1X	zinc finger, CCHC domain containing 2 [Source:MGI Symbol;Acc:MGI:2444114]	227449	Q69ZB8
ENSMUSG00000031504	713.527	197.967	1229.09	6.20855	2.63426	1.18365e-54	4.28412e-53	8	11503518	11528710	-	1392	Rab20	GO:0000166;GO:0003924;GO:0003924;GO:0005525;GO:0005525;GO:0005794;GO:0005794;GO:0005794;GO:0006886;GO:0012505;GO:0015031;GO:0016020;GO:0030670;GO:0031410;GO:0043231;GO:0043231;GO:0045335;GO:0045335;GO:0045335;GO:0071346;GO:0090383;GO:0090383;GO:0090383;GO:0090385;GO:0090385;GO:0090385;	K07911	-	U	KOG0092;1AX7E;13KBU;0A33U;1D1QP;18XG2;0UMR3;0VFVB;0DSF1	RAB20, member RAS oncogene family [Source:MGI Symbol;Acc:MGI:102789]	19332	P35295;Q3TPA7
ENSMUSG00000034168	569.674	1009.42	129.931	0.128719	-2.9577	1.31814e-54	4.75936e-53	12	86927475	86931572	-	4098	Irf2bpl	GO:0000122;GO:0000122;GO:0003714;GO:0005634;GO:0005634;GO:0005634;GO:0005634;GO:0005654;GO:0005654;GO:0006357;GO:0007399;GO:0007399;GO:0016567;GO:0016740;GO:0045944;GO:0045944;GO:0046543;GO:0046872;GO:0061630;GO:0061630;GO:0061630;	K22383	-	K	1CY0R;0VCAV;13KJD;0UQHX;1AY4M;0A0FC;0DP2S;18U58;KOG3579	interferon regulatory factor 2 binding protein-like [Source:MGI Symbol;Acc:MGI:2442463]	238330	Q8K3X4
ENSMUSG00000041153	772.854	222.154	1323.55	5.95782	2.57478	1.57071e-54	5.65761e-53	4	15997121	16013888	-	5571	Osgin2	GO:0005575;GO:0007165;GO:0008083;GO:0030308;GO:0005575;GO:0007165;GO:0008083;GO:0030308;	-	-	T	1ASZE;0DHDJ;12QIZ;09W4G;0UHC4;0V72U;0IF6I;18YR8;1CS3T	oxidative stress induced growth inhibitor family member 2 [Source:MGI Symbol;Acc:MGI:2384798]	209212	-
ENSMUSG00000045980	1000.46	1848.13	152.792	0.0826741	-3.59642	2.06389e-54	7.41609e-53	11	115078313	115137849	+	4610	Tmem104	GO:0016020;GO:0016021;GO:0003674;GO:0005575;GO:0008150;GO:0016020;GO:0016021;	-	-	S	KOG3832;0DEFA;0VDF4;1AXF9;0A1XI;1CZ81;18TCM;0UT0J;13D4D	transmembrane protein 104 [Source:MGI Symbol;Acc:MGI:2444222]	320534	Q3TB48
ENSMUSG00000058152	170.476	7.62836	333.324	43.6954	5.44941	2.23074e-54	7.99636e-53	18	59308473	59669071	+	7228	Chsy3	GO:0005575;GO:0005794;GO:0008376;GO:0008376;GO:0016020;GO:0016021;GO:0016740;GO:0030206;GO:0032580;GO:0032580;GO:0046872;GO:0047238;GO:0047238;GO:0050510;GO:0005575;GO:0005794;GO:0008376;GO:0008376;GO:0016020;GO:0016021;GO:0016740;GO:0030206;GO:0032580;GO:0032580;GO:0046872;GO:0047238;GO:0047238;GO:0050510;	K13499	-	G	09YA9;12R1H;1AU37;0UUPI;18YDX;0V97R;1CUGQ;KOG3588;0DJPT	chondroitin sulfate synthase 3 [Source:MGI Symbol;Acc:MGI:1926173]	78923	Q5DTK1
ENSMUSG00000038147	6870.01	10761.1	2978.89	0.276819	-1.85298	3.11743e-54	1.11405e-52	1	171667265	171718285	+	6267	Cd84	GO:0005886;GO:0016020;GO:0016021;GO:0032685;GO:0032701;GO:0033004;GO:0042802;GO:0043231;GO:0043305;GO:2001256;GO:0016020;GO:0016021;	K06511	-	-	-	CD84 antigen [Source:MGI Symbol;Acc:MGI:1336885]	12523	Q18PI6;A0A0R4J0K5
ENSMUSG00000036155	1985.23	3223.44	747.023	0.231747	-2.10938	3.1228e-54	1.11405e-52	1	127132752	127416073	+	10291	Mgat5	GO:0000139;GO:0004864;GO:0004864;GO:0005576;GO:0005794;GO:0005794;GO:0005794;GO:0006486;GO:0006487;GO:0006487;GO:0006487;GO:0006487;GO:0008375;GO:0016020;GO:0016020;GO:0016020;GO:0016021;GO:0016740;GO:0016757;GO:0016757;GO:0018215;GO:0018279;GO:0018279;GO:0018279;GO:0030144;GO:0030144;GO:0030144;GO:0030144;GO:0030144;GO:0030145;GO:0030145;GO:0030145;GO:0030335;GO:0030335;GO:0043204;GO:1903614;GO:…	K00744	EC:2.4.1.155	G	12N4P;1CPBG;0IDYS;0DEMK;0V49B;0UT9T;1903I;1AZQ9;09TA9	mannoside acetylglucosaminyltransferase 5 [Source:MGI Symbol;Acc:MGI:894701]	107895	Q8R4G6;Q059T5
ENSMUSG00000026395	16778.4	7497.28	26059.5	3.47586	1.79737	3.83984e-54	1.36658e-52	1	137990599	138103446	-	18313	Ptprc	GO:0000187;GO:0001779;GO:0001915;GO:0001916;GO:0001960;GO:0002244;GO:0002711;GO:0002923;GO:0002925;GO:0004721;GO:0004725;GO:0004725;GO:0004725;GO:0004725;GO:0004725;GO:0005102;GO:0005515;GO:0005515;GO:0005886;GO:0005886;GO:0005887;GO:0005887;GO:0005925;GO:0006469;GO:0006469;GO:0006469;GO:0006470;GO:0006470;GO:0006470;GO:0006933;GO:0007159;GO:0008201;GO:0009897;GO:0009898;GO:0009986;GO:0010332;GO:…	K06478	EC:3.1.3.48	-	-	protein tyrosine phosphatase, receptor type, C [Source:MGI Symbol;Acc:MGI:97810]	19264	P06800;Q8C6Q7
ENSMUSG00000004730	29166.7	13180.8	45152.5	3.42562	1.77637	8.13901e-54	2.88974e-52	17	57665691	57790527	+	3238	Adgre1	GO:0002250;GO:0002376;GO:0004888;GO:0004930;GO:0004930;GO:0004930;GO:0005509;GO:0005886;GO:0005886;GO:0005887;GO:0007165;GO:0007166;GO:0007186;GO:0007186;GO:0007189;GO:0009897;GO:0016020;GO:0016021;GO:0016021;GO:0071944;GO:0005509;GO:0005509;GO:0005509;GO:0002250;GO:0002376;GO:0004888;GO:0004930;GO:0004930;GO:0004930;GO:0005509;GO:0005886;GO:0005886;GO:0005887;GO:0007165;GO:0007166;GO:0007186;GO:…	K04591	-	T	190VM;1CPF6;0UK4H;09TEB;13HFH;0V4DH;1AVKM;KOG4193;0DERD	adhesion G protein-coupled receptor E1 [Source:MGI Symbol;Acc:MGI:106912]	13733	Q61549;Q3U9R0
ENSMUSG00000021384	318.397	595.947	40.8467	0.0685408	-3.86689	1.34479e-53	4.76331e-52	13	49384166	49402182	-	2837	Susd3	GO:0003674;GO:0005886;GO:0005886;GO:0005886;GO:0005886;GO:0008150;GO:0016020;GO:0016021;GO:0003674;GO:0005886;GO:0005886;GO:0005886;GO:0008150;GO:0016020;GO:0016021;GO:0016020;GO:0016021;GO:0003674;GO:0005886;GO:0005886;GO:0005886;GO:0008150;GO:0016020;GO:0016021;	K23821	-	S	0IY2S;1CU7E;0UGN6;09Y1V;18T29;0DJEV;13MIT;1ASD3;0V8ZC	sushi domain containing 3 [Source:MGI Symbol;Acc:MGI:1913579]	66329	Q9D176
ENSMUSG00000066306	3455.41	5482.82	1428	0.26045	-1.94092	1.72633e-53	6.10026e-52	7	101583318	101664171	+	7919	Numa1	GO:0000139;GO:0000139;GO:0000132;GO:0000132;GO:0000132;GO:0000132;GO:0000139;GO:0000922;GO:0000922;GO:0000922;GO:0000922;GO:0000922;GO:0001578;GO:0001578;GO:0001578;GO:0005634;GO:0005634;GO:0005634;GO:0005634;GO:0005654;GO:0005654;GO:0005654;GO:0005654;GO:0005694;GO:0005737;GO:0005794;GO:0005813;GO:0005813;GO:0005813;GO:0005813;GO:0005815;GO:0005829;GO:0005829;GO:0005856;GO:0005874;GO:0005876;GO:…	K16808	-	U	0IFJ8;0UN7M;1CSZ0;13HE7;18X8K;0DI8J;0VEQ3;0A3VH;1AVP9	nuclear mitotic apparatus protein 1 [Source:MGI Symbol;Acc:MGI:2443665]	101706	E9Q7G0
ENSMUSG00000018476	800.384	238.042	1362.73	5.72474	2.51721	1.83335e-53	6.46308e-52	11	69289334	69304501	-	6954	Kdm6b	GO:0000785;GO:0000978;GO:0002437;GO:0003682;GO:0003682;GO:0005515;GO:0005634;GO:0005634;GO:0005634;GO:0005634;GO:0005634;GO:0006325;GO:0006338;GO:0006954;GO:0008013;GO:0010468;GO:0014823;GO:0016491;GO:0016577;GO:0021766;GO:0021766;GO:0031490;GO:0043565;GO:0044666;GO:0045165;GO:0045446;GO:0045944;GO:0045944;GO:0046872;GO:0046872;GO:0048333;GO:0051213;GO:0055007;GO:0055114;GO:0060992;GO:0070301;GO:…	K11448	EC:1.14.11.68	P;K;B	KOG1246;13F8M;0WIFP;KOG1124;0V3KS;0B5T6;0E93R;1DFZR	KDM1 lysine (K)-specific demethylase 6B [Source:MGI Symbol;Acc:MGI:2448492]	216850	Q5NCY0
ENSMUSG00000006418	2546.24	1016.54	4075.95	4.00964	2.00347	2.3019e-53	8.09574e-52	2	167334565	167358093	+	3356	Rnf114	GO:0000209;GO:0005634;GO:0005737;GO:0005829;GO:0005829;GO:0005886;GO:0005886;GO:0006511;GO:0007275;GO:0007283;GO:0016567;GO:0016740;GO:0030154;GO:0046872;GO:0061630;GO:0000209;GO:0005634;GO:0005737;GO:0005829;GO:0005886;GO:0006511;GO:0007275;GO:0007283;GO:0016567;GO:0016740;GO:0030154;GO:0046872;GO:0061630;GO:0046872;	K15697	EC:2.3.2.27	O	0A078;0VB37;1CWP2;1B2YC;18YYH;12SKZ;0UFFX;0DMTR;0IEG7	ring finger protein 114 [Source:MGI Symbol;Acc:MGI:1933159]	81018	Q9ET26
ENSMUSG00000034957	4450.63	7017.06	1884.2	0.268518	-1.89691	2.37121e-53	8.31989e-52	7	34818718	34821353	+	2636	Cebpa	GO:0000050;GO:0000122;GO:0000785;GO:0000976;GO:0000976;GO:0000978;GO:0000978;GO:0000978;GO:0000981;GO:0000981;GO:0001163;GO:0001228;GO:0001228;GO:0001228;GO:0001228;GO:0001889;GO:0001889;GO:0001892;GO:0003677;GO:0003677;GO:0003682;GO:0003700;GO:0003700;GO:0003700;GO:0003700;GO:0005515;GO:0005515;GO:0005515;GO:0005634;GO:0005634;GO:0005634;GO:0005654;GO:0005654;GO:0005654;GO:0005667;GO:0005667;GO:…	K09055	-	K	0UQS9;193T6;13MUP;1B0J0;0DM32;KOG3119;09ZJS;1CVPC;0VAGH	CCAAT/enhancer binding protein (C/EBP), alpha [Source:MGI Symbol;Acc:MGI:99480]	12606	P53566
ENSMUSG00000029379	17412.7	10.7297	34814.7	3244.7	11.6639	2.68283e-53	9.39116e-52	5	90933962	90937459	+	3498	Cxcl3	GO:0005125;GO:0005515;GO:0005576;GO:0005576;GO:0005615;GO:0005615;GO:0005615;GO:0005615;GO:0006935;GO:0006935;GO:0006952;GO:0006954;GO:0006954;GO:0006954;GO:0006954;GO:0006955;GO:0007204;GO:0007204;GO:0008009;GO:0008009;GO:0008009;GO:0008009;GO:0008009;GO:0030593;GO:0030593;GO:0030593;GO:0030593;GO:0032496;GO:0045236;GO:0061844;GO:0070098;GO:0071222;GO:0071222;	K05505	-	S;W	0DVJX;1D4WZ;0J3WE;1B6Q4;0VKBQ;13XHT;0A9A4;0UWC6	chemokine (C-X-C motif) ligand 3 [Source:MGI Symbol;Acc:MGI:3037818]	330122	Q6W5C0
ENSMUSG00000022125	3553.63	1478.28	5628.99	3.80781	1.92896	2.87748e-53	1.00489e-51	14	103307652	103315064	+	2563	Cln5	GO:0005515;GO:0005537;GO:0005537;GO:0005764;GO:0005764;GO:0005764;GO:0005765;GO:0005765;GO:0005765;GO:0005775;GO:0005783;GO:0005783;GO:0005794;GO:0005794;GO:0005829;GO:0006465;GO:0006465;GO:0007040;GO:0007040;GO:0007042;GO:0007042;GO:0007420;GO:0007601;GO:0016020;GO:0016021;GO:0016021;GO:0016798;GO:0022008;GO:0042147;GO:0048471;GO:0048471;GO:0070085;GO:0070085;GO:1904426;	K12390	-	O	0DJUS;0UNPE;13I9R;1CUMZ;0V9CB;09VC8;18TPE;0IJEH;1AY63	ceroid-lipofuscinosis, neuronal 5 [Source:MGI Symbol;Acc:MGI:2442253]	211286	Q3UMW8;B2RUP8
ENSMUSG00000049327	3381.85	1400.27	5363.44	3.83029	1.93745	2.96832e-53	1.03419e-51	5	124577993	124600371	+	5307	Kmt5a	GO:0005634;GO:0005694;GO:0008168;GO:0016740;GO:0018024;GO:0032259;GO:0034968;GO:0000122;GO:0002039;GO:0003714;GO:0005634;GO:0005654;GO:0005694;GO:0005829;GO:0008168;GO:0016279;GO:0016740;GO:0018024;GO:0018024;GO:0018026;GO:0032259;GO:0034968;GO:0043516;GO:0045892;GO:0005634;GO:0005694;GO:0008168;GO:0016740;GO:0018024;GO:0032259;GO:0034968;	K11428	EC:2.1.1.361	S;K;B	0VAN1;13JBW;18S7U;1ATBC;0DHZI;0UHR2;09ZRJ;1CSQ7;KOG1085	lysine methyltransferase 5A [Source:MGI Symbol;Acc:MGI:1915206]	67956	Q2YDW7;E9QNB8
ENSMUSG00000025854	14354.5	6456.93	22252	3.44622	1.78502	3.41093e-53	1.18564e-51	5	138740269	138795832	+	6590	Fam20c	GO:0000166;GO:0001501;GO:0004674;GO:0004674;GO:0004674;GO:0004674;GO:0005509;GO:0005524;GO:0005576;GO:0005615;GO:0005615;GO:0005737;GO:0005737;GO:0005737;GO:0005794;GO:0005794;GO:0005794;GO:0006468;GO:0006468;GO:0006468;GO:0006468;GO:0016301;GO:0016310;GO:0016740;GO:0016773;GO:0030145;GO:0030145;GO:0030501;GO:0031214;GO:0031214;GO:0036179;GO:0040036;GO:0045669;GO:0046034;GO:0046034;GO:0046872;GO:…	K21958	EC:2.7.11.1	S;T;P	0UK4F;1AUYQ;1CQS4;09UK5;12R04;18W0P;KOG3829;0V5JE;0DG2M	FAM20C, golgi associated secretory pathway kinase [Source:MGI Symbol;Acc:MGI:2136853]	80752	Q5MJS3
ENSMUSG00000001348	2125.14	659.006	3591.28	5.44954	2.44614	4.35741e-53	1.51111e-51	9	22038023	22047007	-	2030	Acp5	GO:0001503;GO:0003993;GO:0003993;GO:0003993;GO:0003993;GO:0005764;GO:0005764;GO:0008198;GO:0008198;GO:0008199;GO:0008199;GO:0016311;GO:0016787;GO:0016787;GO:0032496;GO:0032691;GO:0032695;GO:0032720;GO:0032929;GO:0034097;GO:0045019;GO:0045453;GO:0045453;GO:0046872;GO:0050728;GO:0050830;GO:0060349;GO:0001503;GO:0003993;GO:0003993;GO:0003993;GO:0003993;GO:0005764;GO:0005764;GO:0008198;GO:0008198;GO:…	K14379	EC:3.1.3.2	O	18WGQ;1B2SR;KOG2679;0VCQA;0DPGS;0A1UK;0USUE;1CYF5;138I5	acid phosphatase 5, tartrate resistant [Source:MGI Symbol;Acc:MGI:87883]	11433	Q05117
ENSMUSG00000038615	5735.43	2485.17	8985.68	3.61572	1.85428	5.80848e-53	2.00965e-51	11	96708240	96720794	-	5441	Nfe2l1	GO:0003677;GO:0003677;GO:0003700;GO:0005634;GO:0005783;GO:0005789;GO:0006355;GO:0006629;GO:0008202;GO:0008203;GO:0008289;GO:0016020;GO:0016021;GO:0034599;GO:0000122;GO:0000209;GO:0000978;GO:0000978;GO:0000978;GO:0000981;GO:0001227;GO:0001228;GO:0003677;GO:0003677;GO:0003682;GO:0003700;GO:0003713;GO:0005515;GO:0005634;GO:0005634;GO:0005634;GO:0005654;GO:0005737;GO:0005783;GO:0005783;GO:0005789;GO:…	K09040	-	K	12QXZ;0UT5C;1B1DT;1CZZP;KOG3863;0DQVP;0VE2W;0A1Z7;18XG1	nuclear factor, erythroid derived 2,-like 1 [Source:MGI Symbol;Acc:MGI:99421]	18023	Q61985;Q3V3M1;Q6GTN8
ENSMUSG00000037111	564.371	995.876	132.866	0.133417	-2.90599	6.03679e-53	2.08381e-51	3	51422740	51468300	-	10813	Setd7	GO:0002039;GO:0002039;GO:0003682;GO:0003682;GO:0005515;GO:0005634;GO:0005634;GO:0005634;GO:0005694;GO:0005694;GO:0005694;GO:0005730;GO:0005730;GO:0006325;GO:0006355;GO:0006479;GO:0006974;GO:0006974;GO:0008168;GO:0016279;GO:0016279;GO:0016279;GO:0016740;GO:0018022;GO:0018024;GO:0018024;GO:0018024;GO:0018024;GO:0018026;GO:0018026;GO:0018026;GO:0018027;GO:0018027;GO:0018027;GO:0032259;GO:0034968;GO:…	K11431	EC:2.1.1.364	K;B	0UFDZ;1CP6Z;0V44U;KOG1079;1ARB5;191FP;0DEH8;09T61;13I14	SET domain containing (lysine methyltransferase) 7 [Source:MGI Symbol;Acc:MGI:1920501]	73251	Q8VHL1
ENSMUSG00000042659	747.244	218.09	1276.4	5.85263	2.54908	7.04934e-53	2.42771e-51	7	68386743	68398989	-	4039	Arrdc4	GO:0005737;GO:0005768;GO:0005768;GO:0005769;GO:0005886;GO:0005886;GO:0005886;GO:0015031;GO:0015031;GO:0016020;GO:0016567;GO:0031410;GO:0043231;GO:0051443;GO:0140112;GO:1903561;GO:1990756;GO:1990756;GO:0005737;GO:0005768;GO:0005768;GO:0005769;GO:0005886;GO:0005886;GO:0005886;GO:0015031;GO:0015031;GO:0016020;GO:0016567;GO:0031410;GO:0043231;GO:0051443;GO:0140112;GO:1903561;GO:1990756;GO:1990756;	-	-	S;C	KOG3780;12RVP;0UJWY;0DHP7;1CSDQ;1AY9R;0V7CD;09WE1;18TFR	arrestin domain containing 4 [Source:MGI Symbol;Acc:MGI:1913662]	66412	A0A0B4J1F4
ENSMUSG00000049130	4792.56	1413.35	8171.78	5.78187	2.53154	8.86979e-53	3.04761e-51	7	15980668	15993465	-	2570	C5ar1	GO:0001774;GO:0001856;GO:0002430;GO:0004875;GO:0004875;GO:0004878;GO:0004878;GO:0004878;GO:0004878;GO:0004930;GO:0004930;GO:0004930;GO:0004930;GO:0005886;GO:0005886;GO:0005886;GO:0006915;GO:0006935;GO:0006935;GO:0006954;GO:0007165;GO:0007186;GO:0007186;GO:0007200;GO:0007204;GO:0007204;GO:0009986;GO:0010575;GO:0010759;GO:0016020;GO:0016021;GO:0016021;GO:0016323;GO:0016323;GO:0021534;GO:0030593;GO:…	K04010	-	T;V	12Q2R;0IF0K;1AV8R;1CSRE;0V7PH;0DI0R;0UPIB;18W9V;09WR1	complement component 5a receptor 1 [Source:MGI Symbol;Acc:MGI:88232]	12273	P30993
ENSMUSG00000026923	2577.08	1037.2	4116.96	3.96932	1.98889	1.1257e-52	3.85895e-51	2	26347915	26406675	-	14232	Notch1	GO:0000122;GO:0000122;GO:0000122;GO:0000122;GO:0000139;GO:0001525;GO:0001669;GO:0001669;GO:0001701;GO:0001708;GO:0001726;GO:0001837;GO:0001837;GO:0001889;GO:0001947;GO:0002040;GO:0002051;GO:0002052;GO:0002052;GO:0002193;GO:0002193;GO:0002437;GO:0003151;GO:0003151;GO:0003157;GO:0003160;GO:0003162;GO:0003169;GO:0003180;GO:0003180;GO:0003180;GO:0003181;GO:0003182;GO:0003184;GO:0003184;GO:0003184;GO:…	K02599	-	T;K	197AB;1BB5B;0B4ZZ;0WHJN;0E8ME;1DFJ6;0V3C1;0IR7G;13DX8	notch 1 [Source:MGI Symbol;Acc:MGI:97363]	18128	Q01705
ENSMUSG00000049401	2105.02	824.054	3385.99	4.10894	2.03877	1.31943e-52	4.51268e-51	2	180231038	180237629	+	2580	Ogfr	GO:0004985;GO:0005634;GO:0005737;GO:0016020;GO:0038003;GO:0038023;GO:0040008;	-	-	K	09WNP;18S2M;0UJC4;1AZGB;12R0H;0DJC0;1CU47;0V8WT;0IH5X	opioid growth factor receptor [Source:MGI Symbol;Acc:MGI:1919325]	72075	Q99PG2
ENSMUSG00000036617	188.573	370.451	6.69418	0.0180703	-5.79023	1.77401e-52	6.05355e-51	2	19914591	20815524	+	16148	Etl4	GO:0048706;GO:0048706;GO:0048706;GO:0048706;GO:0048706;GO:0003674;GO:0005515;GO:0005737;GO:0005737;GO:0007275;GO:0030234;GO:0048706;GO:0048706;GO:0050790;GO:0003674;GO:0005515;GO:0005737;GO:0005737;GO:0007275;GO:0030234;GO:0048706;GO:0048706;GO:0050790;GO:0048706;GO:0003674;GO:0005515;GO:0005737;GO:0005737;GO:0007275;GO:0030234;GO:0048706;GO:0048706;GO:0050790;GO:0003674;GO:0005515;GO:0005737;GO:…	-	-	S	0V5T5;12RRH;0UHPS;18SBZ;1CQSM;09UTK;0IG2A;0DG33;1B44Z	enhancer trap locus 4 [Source:MGI Symbol;Acc:MGI:95454]	208618	A2AQ25;E9QAU4;B2RY09
ENSMUSG00000032014	170.452	9.10194	331.802	36.454	5.188	2.18227e-52	7.42968e-51	9	43132532	43151208	-	2629	Oaf	GO:0003674;GO:0008150;	-	-	S	1CV4H;1AXWU;0DKAK;09YVI;0IFWW;18YVF;12RGB;0V9TB;0UNDF	out at first homolog [Source:MGI Symbol;Acc:MGI:94852]	102644	Q8QZR4
ENSMUSG00000024927	3231.47	1343.86	5119.08	3.80922	1.9295	2.30105e-52	7.81624e-51	19	5687511	5698158	+	3072	Rela	GO:0000122;GO:0000122;GO:0000122;GO:0000785;GO:0000785;GO:0000785;GO:0000785;GO:0000785;GO:0000976;GO:0000976;GO:0000977;GO:0000977;GO:0000978;GO:0000978;GO:0000978;GO:0000978;GO:0000978;GO:0000979;GO:0000979;GO:0000981;GO:0000981;GO:0000981;GO:0000981;GO:0001225;GO:0001225;GO:0001227;GO:0001227;GO:0001227;GO:0001228;GO:0001228;GO:0001228;GO:0001889;GO:0001942;GO:0003677;GO:0003677;GO:0003677;GO:…	K04735	-	K	0IG8F;1CPFA;18YPB;09TEG;13E12;1AXQX;0DERH;0V4DN;0UFH7	v-rel reticuloendotheliosis viral oncogene homolog A (avian) [Source:MGI Symbol;Acc:MGI:103290]	19697	Q04207;Q548Y4
ENSMUSG00000052397	5150.55	982.227	9318.87	9.48749	3.24603	2.70516e-52	9.16805e-51	17	7005440	7050183	-	3290	Ezr	GO:0000122;GO:0000122;GO:0001650;GO:0001650;GO:0001726;GO:0001726;GO:0001772;GO:0001772;GO:0001931;GO:0001951;GO:0003376;GO:0003376;GO:0003779;GO:0003779;GO:0003779;GO:0005515;GO:0005515;GO:0005515;GO:0005737;GO:0005737;GO:0005737;GO:0005768;GO:0005768;GO:0005829;GO:0005829;GO:0005856;GO:0005856;GO:0005884;GO:0005884;GO:0005884;GO:0005886;GO:0005886;GO:0005886;GO:0005886;GO:0005902;GO:0005902;GO:…	K08007	-	Z;S;T	0DIN7;KOG3529;1AWPD;0UIIU;0V7TS;18XKD;1CTD4;12RFB;09W3R	ezrin [Source:MGI Symbol;Acc:MGI:98931]	22350	P26040;Q4KML7;Q8CBU4;Q3UL48
ENSMUSG00000059263	3236.47	1347.64	5125.3	3.80317	1.9272	2.876e-52	9.72491e-51	7	111622711	111710868	+	13755	Usp47	GO:0004197;GO:0004843;GO:0004843;GO:0004843;GO:0004843;GO:0005634;GO:0005737;GO:0005737;GO:0005829;GO:0006281;GO:0006284;GO:0006284;GO:0006508;GO:0006511;GO:0006974;GO:0006974;GO:0008233;GO:0008234;GO:0010972;GO:0010972;GO:0016579;GO:0016579;GO:0016787;GO:0018215;GO:0019005;GO:0019005;GO:0030307;GO:0030307;GO:0031647;GO:0034644;GO:0035520;GO:0035520;GO:0042493;GO:0042493;GO:0043066;GO:0043154;GO:…	K11857	EC:3.4.19.12	O	0VBHU;KOG4598;12U64;0UI42;1ATFS;0DN91;1CX5Q;0A0MK;18YS6	ubiquitin specific peptidase 47 [Source:MGI Symbol;Acc:MGI:1922246]	74996	Q8BY87
ENSMUSG00000028211	570.549	1003.48	137.62	0.137143	-2.86624	3.60038e-52	1.21468e-50	4	11156431	11174379	+	6475	Trp53inp1	GO:0000045;GO:0005634;GO:0005634;GO:0005634;GO:0005634;GO:0005737;GO:0005776;GO:0005776;GO:0005776;GO:0005776;GO:0005829;GO:0005829;GO:0005829;GO:0006355;GO:0006914;GO:0006915;GO:0007050;GO:0008285;GO:0008285;GO:0009408;GO:0010506;GO:0010508;GO:0010508;GO:0010508;GO:0010628;GO:0010629;GO:0016209;GO:0016605;GO:0030336;GO:0031410;GO:0034644;GO:0043065;GO:0045893;GO:0045893;GO:0045893;GO:0045893;GO:…	K15310	-	K	1AWTF;0DI9P;13NHP;0UKQI;1CT06;09WZ5;0IJ9V;18XKI;0V7X6	transformation related protein 53 inducible nuclear protein 1 [Source:MGI Symbol;Acc:MGI:1926609]	60599	Q9QXE4;Q3UQK9
ENSMUSG00000026470	2016.92	792.07	3241.77	4.09278	2.03308	6.26904e-52	2.11025e-50	1	155034461	155084002	+	10637	Stx6	GO:0000139;GO:0000149;GO:0005484;GO:0005484;GO:0005515;GO:0005515;GO:0005654;GO:0005654;GO:0005769;GO:0005769;GO:0005794;GO:0005794;GO:0005794;GO:0005794;GO:0005802;GO:0005802;GO:0005829;GO:0005829;GO:0006886;GO:0006886;GO:0006906;GO:0006906;GO:0006906;GO:0007032;GO:0008021;GO:0008021;GO:0012505;GO:0015031;GO:0016020;GO:0016020;GO:0016020;GO:0016021;GO:0016021;GO:0016021;GO:0016021;GO:0016189;GO:…	K08498	-	U	1CRAZ;0UIFA;KOG3202;0DGM5;1922U;09VCR;0V6BT;12P84;1B1IT	syntaxin 6 [Source:MGI Symbol;Acc:MGI:1926235]	58244	Q9JKK1
ENSMUSG00000035158	3546.68	1499.2	5594.17	3.73144	1.89973	6.99684e-52	2.34993e-50	6	97784013	97998310	+	6196	Mitf	GO:0003700;GO:0005634;GO:0005634;GO:0006355;GO:0006357;GO:0046983;GO:0000122;GO:0000122;GO:0000978;GO:0000978;GO:0000978;GO:0000978;GO:0000981;GO:0000981;GO:0000981;GO:0001228;GO:0001228;GO:0001228;GO:0003677;GO:0003677;GO:0003682;GO:0003700;GO:0003700;GO:0005515;GO:0005634;GO:0005634;GO:0005634;GO:0005634;GO:0005634;GO:0005737;GO:0005737;GO:0005737;GO:0006351;GO:0006351;GO:0006355;GO:0006355;GO:…	K09455	-	K	12SEP;0V8E6;18WUG;0UHJ8;1CQ2G;09XG5;KOG1318;0DFCS;1AT5Z	melanogenesis associated transcription factor [Source:MGI Symbol;Acc:MGI:104554]	17342	Q08874
ENSMUSG00000078153	790.373	240.852	1339.89	5.56315	2.4759	1.39014e-51	4.65838e-50	11	48836181	48837017	-	837	Psme2b	GO:0000502;GO:0005515;GO:0005654;GO:0005737;GO:0008537;GO:0010950;GO:0019884;GO:0042802;GO:0061133;GO:0061136;GO:2000045;	K06697	-	O	0A1VR;0US2U;1B22K;18U73;1CYGD;KOG4470;12U3Q;0DPHV;0VCRB	protease (prosome, macropain) activator subunit 2B [Source:MGI Symbol;Acc:MGI:1341073]	621823	P97372;Q5SVP3
ENSMUSG00000020034	263.524	500.168	26.8812	0.0537445	-4.21774	1.43072e-51	4.78361e-50	10	84412490	84450223	+	3438	Tcp11l2	GO:0003674;GO:0005575;GO:0007165;	-	-	T	0DHA4;1B0FX;09U6Y;18ZAH;0V562;KOG1981;12NJX;1CTHS;0UFK1	t-complex 11 (mouse) like 2 [Source:MGI Symbol;Acc:MGI:2444679]	216198	Q8K1H7
ENSMUSG00000021133	7305.78	2252.01	12359.6	5.48823	2.45634	1.65426e-51	5.51863e-50	12	80837284	80927609	+	7615	Susd6	GO:0006974;GO:0008219;GO:0016020;GO:0016021;GO:0003674;GO:0005575;GO:0006974;GO:0006974;GO:0008219;GO:0008219;GO:0016020;GO:0016021;	K23824	-	S	0IGYD;1B51T;09Z6X;0VA47;18XNM;1CVHC;136BN;0DKNV;0UPPC	sushi domain containing 6 [Source:MGI Symbol;Acc:MGI:2444661]	217684	Q8BGE4
ENSMUSG00000058818	3195.04	1336.78	5053.29	3.78018	1.91845	1.76947e-51	5.8898e-50	7	3714408	3723390	-	4471	Pirb	GO:0001540;GO:0001782;GO:0002250;GO:0002376;GO:0005515;GO:0005515;GO:0005886;GO:0007611;GO:0016020;GO:0016021;GO:0019221;GO:0019724;GO:0035307;GO:0042803;GO:0043011;GO:0044877;GO:0051248;GO:1900271;GO:1900454;	K06512	-	T	13KS9;18SY1;1AU75;0DIAQ;1CRSY;0IKJD;0UIPQ;0A2BJ;0VB6S	paired Ig-like receptor B [Source:MGI Symbol;Acc:MGI:894311]	18733	P97484
ENSMUSG00000027078	1032.04	348.214	1715.86	4.92761	2.30089	1.85445e-51	6.15892e-50	2	84629172	84640679	+	1996	Ube2l6	GO:0000151;GO:0000166;GO:0000209;GO:0005515;GO:0005524;GO:0005634;GO:0006511;GO:0016567;GO:0016740;GO:0018215;GO:0019787;GO:0019941;GO:0031625;GO:0032020;GO:0032020;GO:0042296;GO:0042296;GO:0043130;GO:0061631;GO:0061631;	K04553	EC:2.3.2.23	O	1D38F;0DU0Q;19324;0A73J;1B5M9;0VHXM;0UV75;13QRC;KOG0422	ubiquitin-conjugating enzyme E2L 6 [Source:MGI Symbol;Acc:MGI:1914500]	56791	Q9QZU9
ENSMUSG00000028037	4184.57	339.972	8029.16	23.6171	4.56176	3.3296e-51	1.10336e-49	3	151436559	151455597	-	6129	Ifi44	GO:0003674;GO:0005737;GO:0006955;GO:0009617;	-	-	S	0V4Y2;0DF95;12T23;0UK1C;09TZ5;0IDX3;191K2;1CPYR;1AVXU	interferon-induced protein 44 [Source:MGI Symbol;Acc:MGI:2443016]	99899	Q8BV66
ENSMUSG00000030203	1556.75	275.049	2838.45	10.3198	3.36734	3.41507e-51	1.12917e-49	6	134692431	134769588	-	7798	Dusp16	GO:0000188;GO:0000188;GO:0004721;GO:0004721;GO:0004722;GO:0004725;GO:0005515;GO:0005634;GO:0005634;GO:0005654;GO:0005737;GO:0005737;GO:0005829;GO:0005829;GO:0006470;GO:0006470;GO:0008138;GO:0008330;GO:0016311;GO:0016311;GO:0016787;GO:0016791;GO:0016791;GO:0017017;GO:0017017;GO:0035335;GO:0035970;GO:0043409;GO:0051019;GO:0106306;GO:0106307;GO:0000188;GO:0000188;GO:0004721;GO:0004721;GO:0004722;GO:…	K04459	-	V	13117;0DHPX;1B45D;0V7D4;191CU;0UJXZ;09WEM;KOG1716;1CSEB	dual specificity phosphatase 16 [Source:MGI Symbol;Acc:MGI:1917936]	70686	F6UIK0
ENSMUSG00000025375	566.291	993.964	138.618	0.13946	-2.84208	3.88879e-51	1.28296e-49	11	119898139	119937993	-	7159	Aatk	GO:0004672;GO:0004713;GO:0005524;GO:0006468;GO:0018108;GO:0004672;GO:0004713;GO:0005524;GO:0006468;GO:0018108;GO:0004672;GO:0004713;GO:0005524;GO:0006468;GO:0018108;GO:0004672;GO:0005524;GO:0006468;	K17480	EC:2.7.10.1	T	0IGQE;09T8X;18UAM;13ITK;0UIII;1B2P4;0DEK3;0V47W;1CPA0	apoptosis-associated tyrosine kinase [Source:MGI Symbol;Acc:MGI:1197518]	11302	Q80YE4;B1AZF3
ENSMUSG00000046207	1210.4	259.052	2161.75	8.34486	3.06089	4.28228e-51	1.40965e-49	11	68393845	68443524	+	3622	Pik3r6	GO:0001525;GO:0005515;GO:0005737;GO:0005886;GO:0005942;GO:0005944;GO:0005944;GO:0007186;GO:0007186;GO:0016020;GO:0042269;GO:0043406;GO:0043406;GO:0043551;GO:0045582;GO:0045766;GO:0045766;GO:0046854;GO:0046934;GO:0046935;GO:0046935;GO:0046935;GO:0001525;GO:0005515;GO:0005737;GO:0005886;GO:0005942;GO:0005944;GO:0005944;GO:0007186;GO:0007186;GO:0016020;GO:0042269;GO:0042269;GO:0043406;GO:0043406;GO:…	K21290	-	S;T	0A1J7;18VKG;0UQK3;1ATI6;0VCEX;0DMDV;0ITTQ;13M63;1CW94	phosphoinositide-3-kinase regulatory subunit 5 [Source:MGI Symbol;Acc:MGI:2144613]	104709	Q3U6Q4
ENSMUSG00000031824	620.513	1079.62	161.409	0.149506	-2.74172	4.60222e-51	1.51164e-49	8	120840891	120892045	+	6626	6430548M08Rik	GO:0003674;GO:0005575;GO:0008150;GO:0003674;GO:0005575;GO:0008150;	-	-	S	1AWMT;0VCM8;0UIHK;0IDYE;19114;13IIA;1CUU5;0A1RM;0DK05	RIKEN cDNA 6430548M08 gene [Source:MGI Symbol;Acc:MGI:2443793]	234797	Q8R0A7
ENSMUSG00000008496	1209.49	427.894	1991.1	4.65325	2.21824	4.81158e-51	1.57693e-49	7	24786769	24879151	-	8243	Pou2f2	GO:0000785;GO:0000976;GO:0000978;GO:0000978;GO:0000981;GO:0000981;GO:0001228;GO:0002335;GO:0003677;GO:0003677;GO:0003677;GO:0003700;GO:0003700;GO:0003700;GO:0005634;GO:0005634;GO:0005634;GO:0005654;GO:0005737;GO:0006355;GO:0006355;GO:0006357;GO:0019904;GO:0032755;GO:0043231;GO:0043565;GO:0045893;GO:0045944;GO:0045944;GO:0048469;GO:0098586;GO:1990837;GO:0000785;GO:0000976;GO:0000978;GO:0000978;GO:…	K09364	-	K	13KGX;1B52K;09ZXK;KOG3802;0VAU8;18TT1;0DMGG;1CWBU;0UIUM	POU domain, class 2, transcription factor 2 [Source:MGI Symbol;Acc:MGI:101897]	18987	Q00196
ENSMUSG00000027195	3321.68	1409.08	5234.28	3.71467	1.89323	5.80875e-51	1.89956e-49	2	93863034	93988309	-	2407	Hsd17b12	GO:0001968;GO:0004303;GO:0005518;GO:0005783;GO:0005789;GO:0006629;GO:0006633;GO:0006694;GO:0006703;GO:0008201;GO:0009923;GO:0009923;GO:0010811;GO:0016020;GO:0016021;GO:0016491;GO:0016491;GO:0030198;GO:0031012;GO:0050062;GO:0050062;GO:0055114;GO:0055114;GO:0102339;GO:0102340;GO:0102341;GO:0102342;	K10251	-	Q;I	1AYP1;1CV0W;0UP3V;KOG1014;09UPB;0DK70;0V9QB;1929T;12QGJ	hydroxysteroid (17-beta) dehydrogenase 12 [Source:MGI Symbol;Acc:MGI:1926967]	56348	O70503;Q0VGQ1
ENSMUSG00000031779	124.192	1.8574	246.526	132.727	7.05231	2.12271e-50	6.92646e-49	8	95472218	95478327	+	2325	Ccl22	GO:0002548;GO:0005125;GO:0005576;GO:0005576;GO:0005615;GO:0005615;GO:0005615;GO:0005615;GO:0006935;GO:0006954;GO:0006954;GO:0006954;GO:0006955;GO:0007165;GO:0007186;GO:0008009;GO:0008009;GO:0030593;GO:0031640;GO:0043547;GO:0048020;GO:0048247;GO:0060326;GO:0061844;GO:0070098;GO:0070374;GO:0071346;GO:0071347;GO:0071356;	K21095	-	O;W	13VFZ;0DVRV;1D52B;0A9NQ;0UWA2;0VKK6;0J20K;1B6T1;193QM	chemokine (C-C motif) ligand 22 [Source:MGI Symbol;Acc:MGI:1306779]	20299	O88430;Q546S6
ENSMUSG00000070462	2683.1	1120.41	4245.79	3.78948	1.922	3.12043e-50	1.01598e-48	7	83529081	83533513	-	4433	Tlnrd1	GO:0001725;GO:0003779;GO:0003779;GO:0003779;GO:0008150;GO:0042802;GO:0042802;	-	-	Z	12STT;1CWYX;KOG4261;0UTVV;0A0FM;0VBBR;18YR3;1B2PR;0DMJP	talin rod domain containing 1 [Source:MGI Symbol;Acc:MGI:1891420]	80889	Q9ERE8
ENSMUSG00000031770	799.431	250.659	1348.2	5.37862	2.42724	3.23963e-50	1.05249e-48	8	95113066	95122005	+	2333	Herpud1	GO:0005515;GO:0005783;GO:0005783;GO:0005783;GO:0005783;GO:0005783;GO:0005789;GO:0005789;GO:0005789;GO:0005789;GO:0006511;GO:0006511;GO:0006874;GO:0006874;GO:0006986;GO:0006986;GO:0016020;GO:0016021;GO:0016021;GO:0016567;GO:0030433;GO:0030433;GO:0030968;GO:0030968;GO:0030968;GO:0030970;GO:0030970;GO:0031396;GO:0032469;GO:0032469;GO:0032469;GO:0032469;GO:0034976;GO:0034976;GO:0043154;GO:0043154;GO:…	K14027	-	O	12SIW;0V5IS;18YIP;09UJK;0URVF;0DI3Y;1AXJH;1CX23;KOG4583	homocysteine-inducible, endoplasmic reticulum stress-inducible, ubiquitin-like domain member 1 [Source:MGI Symbol;Acc:MGI:1927406]	64209	Q9JJK5;Q3TMN9
ENSMUSG00000055782	169.501	334.283	4.71902	0.0141168	-6.14644	6.13564e-50	1.98902e-48	15	91030074	91076002	-	5946	Abcd2	GO:0000038;GO:0000038;GO:0000166;GO:0005524;GO:0005524;GO:0005777;GO:0005777;GO:0006635;GO:0006635;GO:0016020;GO:0016021;GO:0016021;GO:0016887;GO:0032000;GO:0042626;GO:0042760;GO:0042803;GO:0055085;	K05676	-	Q;I	0UFQI;0DEQ8;09TCZ;1AY0J;1CPDZ;0V4C2;190X1;KOG0064;12NB6	ATP-binding cassette, sub-family D (ALD), member 2 [Source:MGI Symbol;Acc:MGI:1349467]	26874	Q61285;A0A0R4J0U5
ENSMUSG00000042396	3441.52	1481.28	5401.77	3.64669	1.86659	6.58008e-50	2.12846e-48	9	48400001	48406599	-	4941	Rbm7	GO:0003676;GO:0003723;GO:0000381;GO:0003676;GO:0003723;GO:0003723;GO:0003727;GO:0005515;GO:0005634;GO:0005634;GO:0005634;GO:0005654;GO:0005654;GO:0016076;GO:0017069;GO:0051321;GO:0071889;GO:0071889;GO:0097157;GO:0003676;	K13188	-	S	1B2CH;0DQ1U;1CZ2I;KOG4454;18YA2;0UME0;0A2ES;13WPK;0VDAE	RNA binding motif protein 7 [Source:MGI Symbol;Acc:MGI:1914260]	67010	Q9CQT2;Q14A95
ENSMUSG00000039976	608.484	1091.65	125.317	0.114795	-3.12286	8.18322e-50	2.6413e-48	11	119033871	119119325	-	7119	Tbc1d16	GO:0001919;GO:0001919;GO:0001919;GO:0005096;GO:0005096;GO:0005096;GO:0005096;GO:0005769;GO:0005769;GO:0005769;GO:0005769;GO:0005829;GO:0005829;GO:0005829;GO:0006886;GO:0031267;GO:0090630;GO:0001919;GO:0005096;GO:0005096;GO:0005769;GO:0005769;GO:0005829;GO:0006886;GO:0031267;GO:0090630;GO:0001919;GO:0005096;GO:0005096;GO:0005769;GO:0005769;GO:0005829;GO:0006886;GO:0031267;GO:0090630;	K24797	-	T	18TRM;0VBDS;0A0HN;12SVF;0DN4M;KOG2224;1CU0Q;0URDN;1B33H	TBC1 domain family, member 16 [Source:MGI Symbol;Acc:MGI:2652878]	207592	Q6PFC0
ENSMUSG00000030232	2459.91	1018.82	3901	3.82894	1.93694	8.31023e-50	2.6765e-48	6	140568389	140624198	+	9851	Aebp2	GO:0000122;GO:0000978;GO:0001227;GO:0001227;GO:0003677;GO:0003677;GO:0005634;GO:0005634;GO:0005654;GO:0006325;GO:0006355;GO:0006357;GO:0035098;GO:0035098;GO:0035098;GO:0046872;GO:0000122;GO:0000978;GO:0001227;GO:0001227;GO:0003677;GO:0003677;GO:0005634;GO:0005634;GO:0005654;GO:0006325;GO:0006355;GO:0006357;GO:0035098;GO:0035098;GO:0035098;GO:0046872;GO:0000122;GO:0000978;GO:0001227;GO:0001227;GO:…	K17452	-	K	09XNA;18Y2B;1CTRG;13HMW;0V8JZ;1AX50;KOG1721;0DJ01;0UMNM	AE binding protein 2 [Source:MGI Symbol;Acc:MGI:1338038]	11569	Q9Z248
ENSMUSG00000027219	1090.64	383.302	1797.97	4.69075	2.22982	8.82074e-50	2.8348e-48	2	122256958	122291618	+	4208	Slc28a2	GO:0001895;GO:0001895;GO:0005326;GO:0005337;GO:0005337;GO:0005337;GO:0005345;GO:0005415;GO:0005415;GO:0005415;GO:0005886;GO:0005887;GO:0005887;GO:0005887;GO:0006836;GO:0012506;GO:0015211;GO:0015211;GO:0015213;GO:0015293;GO:0015389;GO:0015855;GO:0015860;GO:0015862;GO:0016020;GO:0016020;GO:0016021;GO:0030135;GO:0031526;GO:0032238;GO:0034394;GO:0035340;GO:0072531;GO:1901642;GO:1901642;GO:1901642;GO:…	K11536	-	P	1CQTG;0UHQW;KOG3747;18ZRN;09UUI;0V5U1;0DG3V;1B123;12NJF	solute carrier family 28 (sodium-coupled nucleoside transporter), member 2 [Source:MGI Symbol;Acc:MGI:1913105]	269346	O88627
ENSMUSG00000042700	803.634	255.032	1352.24	5.30222	2.4066	1.69671e-49	5.44113e-48	12	82216094	82498560	+	12806	Sipa1l1	GO:0005096;GO:0005096;GO:0005096;GO:0005737;GO:0005737;GO:0005856;GO:0005886;GO:0014069;GO:0014069;GO:0015629;GO:0019901;GO:0030054;GO:0031532;GO:0031532;GO:0031532;GO:0031625;GO:0032991;GO:0043005;GO:0043025;GO:0043087;GO:0043087;GO:0043087;GO:0043197;GO:0043197;GO:0044877;GO:0045202;GO:0046875;GO:0048013;GO:0048167;GO:0048167;GO:0048814;GO:0048814;GO:0050770;GO:0051015;GO:0051056;GO:0061001;GO:…	K17701	-	W;T	12P2U;0UMPB;0DGA6;09V0S;1CQZJ;18TP9;1AX5M;KOG3686;0V60F	signal-induced proliferation-associated 1 like 1 [Source:MGI Symbol;Acc:MGI:2443679]	217692	Q8C0T5
ENSMUSG00000027009	7135.38	1748.14	12522.6	7.16341	2.84065	1.87552e-49	6.00167e-48	2	79085770	79163467	+	13978	Itga4	GO:0001968;GO:0002687;GO:0003366;GO:0003823;GO:0005886;GO:0005886;GO:0007155;GO:0007155;GO:0007159;GO:0007160;GO:0007229;GO:0008305;GO:0009986;GO:0009986;GO:0016020;GO:0016021;GO:0019960;GO:0030426;GO:0033631;GO:0034113;GO:0034446;GO:0034669;GO:0035987;GO:0043025;GO:0043113;GO:0050839;GO:0050839;GO:0050901;GO:0050904;GO:0060385;GO:0070062;GO:0071345;GO:0090074;GO:0098657;GO:0140039;GO:1903039;GO:…	K06483	-	W	1DEZB;0WGDJ;13CAV;0E7ZW;1974F;0B3YG;1BAVK;0IPB2;0V2YW	integrin alpha 4 [Source:MGI Symbol;Acc:MGI:96603]	16401	Q00651;Q792F9;Q8BQ25
ENSMUSG00000015839	10311.8	4769.3	15854.4	3.32426	1.73303	2.5618e-49	8.18021e-48	2	75505857	75534985	-	3796	Nfe2l2	GO:0000785;GO:0000976;GO:0000976;GO:0000976;GO:0000976;GO:0000978;GO:0000978;GO:0000981;GO:0001102;GO:0001102;GO:0001221;GO:0001221;GO:0001228;GO:0003677;GO:0003677;GO:0003677;GO:0003677;GO:0003700;GO:0003700;GO:0003700;GO:0003700;GO:0005515;GO:0005515;GO:0005515;GO:0005634;GO:0005634;GO:0005634;GO:0005634;GO:0005634;GO:0005634;GO:0005634;GO:0005634;GO:0005654;GO:0005654;GO:0005667;GO:0005737;GO:…	K05638	-	K	14TS3;196UM;1DCYS;0E5ZD;1BA5P;0WD2H;0V1CS;0KDJ5;0B0JB	nuclear factor, erythroid derived 2, like 2 [Source:MGI Symbol;Acc:MGI:108420]	18024	Q60795
ENSMUSG00000036622	4503.65	7008.73	1998.58	0.285157	-1.81017	2.88207e-49	9.1832e-48	4	140714184	140734641	+	6000	Atp13a2	GO:0000166;GO:0000166;GO:0005524;GO:0006812;GO:0016020;GO:0016021;GO:0016021;GO:0016887;GO:0046872;GO:0000166;GO:0000166;GO:0000421;GO:0005524;GO:0005764;GO:0005764;GO:0005764;GO:0005765;GO:0005765;GO:0005765;GO:0005768;GO:0005770;GO:0005770;GO:0005771;GO:0005771;GO:0005776;GO:0005776;GO:0006812;GO:0006874;GO:0006874;GO:0006874;GO:0006879;GO:0006879;GO:0006882;GO:0006882;GO:0006914;GO:0006914;GO:…	K13526	EC:7.2.2.-	P	12PU6;0DEPA;0V4B6;09TBZ;1B4ZP;KOG0208;0UT8R;1CUFE;18ZCV	ATPase type 13A2 [Source:MGI Symbol;Acc:MGI:1922022]	74772	Q9CTG6
ENSMUSG00000005610	28177.2	9114.13	47240.3	5.18319	2.37384	3.55595e-49	1.13062e-47	7	110666957	110682237	-	10166	Eif4g2	GO:0003723;GO:0003743;GO:0003743;GO:0005829;GO:0006412;GO:0006413;GO:0006446;GO:0007507;GO:0008135;GO:0010507;GO:0016281;GO:0030307;GO:0030424;GO:0034645;GO:0045727;GO:0045773;GO:0060999;GO:0003723;GO:0003743;GO:0006412;GO:0006413;GO:0003723;	K03260	-	J	19757;1DF1I;0E829;0B42A;13CGC;0V30G;1BAWU;0WGHS;0IPIB	eukaryotic translation initiation factor 4, gamma 2 [Source:MGI Symbol;Acc:MGI:109207]	13690	Q62448;A0JNY7
ENSMUSG00000037820	5878.56	2660.15	9096.98	3.41973	1.77388	5.0115e-49	1.59003e-47	2	157958322	157988356	-	4608	Tgm2	GO:0001974;GO:0001974;GO:0003810;GO:0003810;GO:0003810;GO:0003810;GO:0003810;GO:0005509;GO:0005525;GO:0005525;GO:0005525;GO:0005737;GO:0005737;GO:0005739;GO:0005739;GO:0005739;GO:0005739;GO:0005783;GO:0005829;GO:0005829;GO:0005829;GO:0005886;GO:0005886;GO:0005886;GO:0007186;GO:0007200;GO:0007200;GO:0008483;GO:0016020;GO:0016740;GO:0016746;GO:0018149;GO:0018149;GO:0018149;GO:0018149;GO:0018149;GO:…	K05625	EC:2.3.2.13	O;T	18UI9;0V54T;12WTW;0IFMV;0UGRC;09U5T;1CQ55;0DFFC;1AXCB	transglutaminase 2, C polypeptide [Source:MGI Symbol;Acc:MGI:98731]	21817	P21981
ENSMUSG00000031453	2054.97	3778.42	331.521	0.0877404	-3.51061	6.91561e-49	2.1895e-47	8	13616948	13727603	-	5095	Rasa3	GO:0005096;GO:0005096;GO:0007165;GO:0015278;GO:0015278;GO:0031235;GO:0031235;GO:0034605;GO:0035556;GO:0043087;GO:0043547;GO:0046580;GO:0046872;GO:0051209;	K12380	-	T	0URC2;KOG2059;18TE0;09WRB;0V7PR;12R8D;1CSRM;0DI0X;1AW1K	RAS p21 protein activator 3 [Source:MGI Symbol;Acc:MGI:1197013]	19414	Q60790
ENSMUSG00000019189	1607.69	627.228	2588.15	4.12634	2.04486	8.51446e-49	2.68999e-47	11	44409791	44456347	+	7786	Rnf145	GO:0005783;GO:0005783;GO:0005789;GO:0008270;GO:0012505;GO:0016020;GO:0016021;GO:0016567;GO:0016740;GO:0046872;GO:0061630;GO:0016020;GO:0016021;	K23789	EC:2.3.2.27	O	KOG0802;0DFHX;09U84;12T2W;1918R;0V579;1B06S;1CQ7R;0UQFS	ring finger protein 145 [Source:MGI Symbol;Acc:MGI:1921565]	74315	Q5SWK7
ENSMUSG00000021998	52160.8	24921.6	79400	3.186	1.67174	8.99218e-49	2.83491e-47	14	75368541	75468282	+	9504	Lcp1	GO:0005509;GO:0051015;GO:0051017;GO:0005509;GO:0051015;GO:0051017;GO:0005509;GO:0051015;GO:0051017;GO:0001725;GO:0001726;GO:0001891;GO:0002102;GO:0002286;GO:0002286;GO:0003779;GO:0005178;GO:0005509;GO:0005515;GO:0005515;GO:0005737;GO:0005737;GO:0005737;GO:0005829;GO:0005829;GO:0005856;GO:0005884;GO:0005884;GO:0005886;GO:0005886;GO:0005925;GO:0009611;GO:0010737;GO:0015629;GO:0016020;GO:0016477;GO:…	K17276	-	Z	0V55N;12U9H;1CRV4;09VWS;KOG0046;1AX42;0DH4W;18VE7;0UMME	lymphocyte cytosolic protein 1 [Source:MGI Symbol;Acc:MGI:104808]	18826	Q61233
ENSMUSG00000029254	2482.88	702.196	4263.55	6.07175	2.60211	9.35829e-49	2.94411e-47	5	86219605	86253984	+	6215	Stap1	GO:0001784;GO:0001784;GO:0005068;GO:0005157;GO:0005515;GO:0005634;GO:0005634;GO:0005634;GO:0005654;GO:0005654;GO:0005737;GO:0005737;GO:0005737;GO:0005739;GO:0005739;GO:0005739;GO:0007169;GO:0007169;GO:0009617;GO:0010628;GO:0010760;GO:0019901;GO:0019901;GO:0030099;GO:0030674;GO:0030971;GO:0032991;GO:0032991;GO:0035591;GO:0035591;GO:0035591;GO:0042326;GO:0043231;GO:0043231;GO:0050861;GO:0050861;GO:…	K24025	-	T	0DQ4A;18SQY;12ZI6;0A2GV;1ATUI;0VDCR;1CZ5D;0UIAD;0IGPX	signal transducing adaptor family member 1 [Source:MGI Symbol;Acc:MGI:1926193]	56792	Q9JM90
ENSMUSG00000021823	1269.93	471.296	2068.57	4.38912	2.13393	1.01165e-48	3.17594e-47	14	20979466	21083744	+	8191	Vcl	GO:0001725;GO:0002009;GO:0002009;GO:0002102;GO:0002162;GO:0002162;GO:0003779;GO:0003779;GO:0003779;GO:0005198;GO:0005515;GO:0005515;GO:0005515;GO:0005737;GO:0005856;GO:0005884;GO:0005886;GO:0005886;GO:0005903;GO:0005911;GO:0005911;GO:0005912;GO:0005912;GO:0005912;GO:0005915;GO:0005916;GO:0005925;GO:0005925;GO:0005925;GO:0007155;GO:0007155;GO:0007155;GO:0014704;GO:0015629;GO:0015629;GO:0016020;GO:…	K05700	-	Z;W	18TNR;0DKX6;0V5HX;12NSN;0UPZE;1CVSF;KOG3681;1AZNU;09UIR	vinculin [Source:MGI Symbol;Acc:MGI:98927]	22330	Q64727
ENSMUSG00000004947	622.094	167.262	1076.93	6.43857	2.68674	1.46725e-48	4.59657e-47	5	136023654	136061726	+	7032	Dtx2	GO:0005515;GO:0005634;GO:0005654;GO:0005654;GO:0005654;GO:0005737;GO:0007219;GO:0007219;GO:0007219;GO:0007219;GO:0008270;GO:0016567;GO:0016567;GO:0016567;GO:0016740;GO:0031965;GO:0031965;GO:0046872;GO:0046872;GO:0061630;GO:0005515;GO:0005634;GO:0005654;GO:0005654;GO:0005737;GO:0007219;GO:0007219;GO:0007219;GO:0007219;GO:0008270;GO:0016567;GO:0016567;GO:0016567;GO:0016740;GO:0031965;GO:0046872;GO:…	K06058	EC:2.3.2.27	O	0V4HT;139G2;1922G;1CVFW;0IEMS;1AZ90;0UPMA;09TIV;0DEVG	deltex 2, E3 ubiquitin ligase [Source:MGI Symbol;Acc:MGI:1921448]	74198	Q8R3P2
ENSMUSG00000028771	3088.8	977.738	5199.87	5.31827	2.41096	1.75826e-48	5.49668e-47	5	21191643	21260909	-	3509	Ptpn12	GO:0002102;GO:0004721;GO:0004721;GO:0004721;GO:0004725;GO:0004725;GO:0004725;GO:0004725;GO:0004726;GO:0005515;GO:0005515;GO:0005515;GO:0005634;GO:0005737;GO:0005737;GO:0005829;GO:0005925;GO:0006470;GO:0006470;GO:0006470;GO:0016311;GO:0016787;GO:0016791;GO:0017124;GO:0017124;GO:0030054;GO:0035335;GO:0035335;GO:0035335;GO:0035335;GO:0042058;GO:0042058;GO:0042058;GO:0042058;GO:0042246;GO:0042995;GO:…	K18024	EC:3.1.3.48	T	1ASV7;0UH6T;KOG0789;0DGMB;1CRB6;09VCV;0V6BY;18WZ5;12P88	protein tyrosine phosphatase, non-receptor type 12 [Source:MGI Symbol;Acc:MGI:104673]	19248	P35831
ENSMUSG00000038127	4309.89	1921.77	6698.02	3.48534	1.8013	1.87745e-48	5.85703e-47	16	27207619	27270968	+	9164	Ccdc50	GO:0005829;GO:0007605;GO:0031625;GO:0005737;GO:0005737;GO:0007605;GO:0015630;GO:0005737;GO:0007605;GO:0015630;GO:0005737;GO:0005737;GO:0007605;GO:0015630;	-	-	S	1CY0F;0A1F0;1ASJI;0VCAI;0IKBK;13ITI;0DP2H;0UQIG;18VH7	coiled-coil domain containing 50 [Source:MGI Symbol;Acc:MGI:1914751]	67501	Q810U5;A6H6M8
ENSMUSG00000052593	12482.3	5855.7	19108.9	3.26329	1.70633	1.94387e-48	6.05155e-47	12	21373510	21423633	-	7154	Adam17	GO:0001666;GO:0001934;GO:0004175;GO:0004222;GO:0004222;GO:0005112;GO:0005138;GO:0005178;GO:0005737;GO:0005829;GO:0005887;GO:0005911;GO:0005925;GO:0006508;GO:0006508;GO:0006509;GO:0007155;GO:0007173;GO:0007220;GO:0008237;GO:0008237;GO:0008284;GO:0009986;GO:0010820;GO:0015629;GO:0016020;GO:0016021;GO:0016324;GO:0016485;GO:0017124;GO:0030165;GO:0030307;GO:0030335;GO:0030512;GO:0032496;GO:0032587;GO:…	K06059	EC:3.4.24.86	O;W	KOG3658;0DMVZ;18Z3X;1ARV9;12SZN;09WYZ;1CX6I;0UG1H;0V99K	a disintegrin and metallopeptidase domain 17 [Source:MGI Symbol;Acc:MGI:1096335]	11491	Q9Z0F8
ENSMUSG00000024737	16250.3	7701.1	24799.6	3.22026	1.68718	2.15511e-48	6.6952e-47	19	10817091	10836726	+	5491	Slc15a3	GO:0002376;GO:0005764;GO:0005765;GO:0005765;GO:0005765;GO:0005765;GO:0005768;GO:0006857;GO:0010008;GO:0015031;GO:0015293;GO:0015647;GO:0015833;GO:0015835;GO:0016020;GO:0016020;GO:0016021;GO:0022857;GO:0043231;GO:0043231;GO:0045087;GO:0055085;GO:0070434;GO:0071916;GO:0071916;GO:0071916;GO:0140206;GO:0140206;GO:0140206;	K14638	-	P;E	0DJYU;1AZVC;09XYR;18YTV;12QTM;KOG1237;0V5WI;1CUSI;0UG9S	solute carrier family 15, member 3 [Source:MGI Symbol;Acc:MGI:1929691]	65221	Q8BPX9
ENSMUSG00000027215	1888.87	766.879	3010.87	3.92613	1.97311	2.59051e-48	8.03111e-47	2	93249456	93293485	-	3005	Cd82	GO:0005886;GO:0005886;GO:0005887;GO:0016020;GO:0016021;GO:0016021;GO:0005886;GO:0005886;GO:0005886;GO:0005887;GO:0016020;GO:0016021;GO:0016021;GO:0005886;GO:0005886;GO:0005887;GO:0016020;GO:0016021;GO:0016021;GO:0005886;GO:0005886;GO:0005887;GO:0016020;GO:0016021;GO:0016021;GO:0016020;GO:0016021;GO:0016021;GO:0016020;GO:0016021;GO:0016021;GO:0016020;GO:0016021;GO:0016021;GO:0016020;GO:0016021;GO:…	K06509	-	S;G	1CPKR;192Z3;KOG3882;0V4JI;09TKH;0DEX6;13ITH;1B0JZ;0UFZJ	CD82 antigen [Source:MGI Symbol;Acc:MGI:104651]	12521	P40237;Q3UII2
ENSMUSG00000062127	2145.78	3409.45	882.113	0.258726	-1.9505	2.68941e-48	8.32042e-47	3	104909231	104960462	-	8138	Cttnbp2nl	GO:0005737;GO:0005856;GO:0006470;GO:0006470;GO:0006470;GO:0015629;GO:0015629;GO:0015629;GO:0030027;GO:0032410;GO:0032410;GO:0034763;GO:0034763;GO:0042995;GO:0051721;GO:0051721;GO:0051721;GO:0005737;GO:0005856;GO:0006470;GO:0006470;GO:0015629;GO:0015629;GO:0030027;GO:0032410;GO:0034763;GO:0042995;GO:0051721;GO:0051721;	-	-	Z;S	0URCX;KOG1103;1B202;0DRAA;1D0FM;0A3PH;18Z1U;0VEIC;13N7J	CTTNBP2 N-terminal like [Source:MGI Symbol;Acc:MGI:1933137]	80281	Q99LJ0
ENSMUSG00000042726	4577.98	1856.44	7299.52	3.932	1.97526	3.45378e-48	1.06631e-46	5	121509788	121523695	-	4486	Trafd1	GO:0005515;GO:0005515;GO:0008270;GO:0045824;GO:0046872;GO:0005515;GO:0005515;GO:0008270;GO:0045824;GO:0046872;GO:0008270;GO:0046872;	-	-	S;T	0DHHZ;12S7U;18XZG;0V6K8;0UJQC;0IGBJ;1AV75;1CS87;09XFH	TRAF type zinc finger domain containing 1 [Source:MGI Symbol;Acc:MGI:1923551]	231712	Q3UDK1
ENSMUSG00000044197	459.49	822.118	96.863	0.117821	-3.08533	4.05582e-48	1.24959e-46	5	139363452	139382170	+	6786	Gpr146	GO:0016020;GO:0016021;GO:0003674;GO:0004930;GO:0004930;GO:0005886;GO:0005886;GO:0007165;GO:0007186;GO:0007186;GO:0008150;GO:0016020;GO:0016021;GO:0016021;GO:0003674;GO:0004930;GO:0004930;GO:0005886;GO:0005886;GO:0005886;GO:0007165;GO:0007186;GO:0007186;GO:0008150;GO:0016020;GO:0016021;GO:0016021;	K08431	-	T	0ITRV;12TU1;1CSDM;195WY;1AVA5;09WDY;0V7CA;0DH4I;0UJTC	G protein-coupled receptor 146 [Source:MGI Symbol;Acc:MGI:1933113]	80290	Q99LE2
ENSMUSG00000024535	412.094	738.634	85.5543	0.115828	-3.10995	6.35066e-48	1.9526e-46	18	53378734	53523992	+	2456	Snx24	GO:0005575;GO:0008150;GO:0008289;GO:0010314;GO:0015031;GO:0016020;GO:0030659;GO:0031410;GO:0032266;GO:0035091;GO:0070273;GO:1901981;GO:0005575;GO:0008150;GO:0008289;GO:0010314;GO:0015031;GO:0016020;GO:0030659;GO:0031410;GO:0032266;GO:0035091;GO:0070273;GO:1901981;	K17941	-	U	0IMHV;1BAMM;13ATT;0WFER;0B336;1970C;1DEGP;0E7FR;0V2MX	sorting nexing 24 [Source:MGI Symbol;Acc:MGI:1916476]	69226	Q9CRB0
ENSMUSG00000032193	3952.91	1101	6804.83	6.18058	2.62774	7.49735e-48	2.30042e-46	9	21634779	21661215	+	9622	Ldlr	GO:0001540;GO:0002020;GO:0005041;GO:0005041;GO:0005509;GO:0005515;GO:0005615;GO:0005764;GO:0005764;GO:0005768;GO:0005768;GO:0005769;GO:0005769;GO:0005770;GO:0005770;GO:0005794;GO:0005794;GO:0005886;GO:0005886;GO:0005886;GO:0005886;GO:0005901;GO:0005905;GO:0005905;GO:0006629;GO:0006629;GO:0006869;GO:0006897;GO:0006897;GO:0006898;GO:0006909;GO:0007616;GO:0007616;GO:0008202;GO:0008203;GO:0008203;GO:…	K12473	-	T	1DCIN;196RX;0B01R;0WCI5;0E5IS;14T6W;0V10Y;1B9XX;0KD0U	low density lipoprotein receptor [Source:MGI Symbol;Acc:MGI:96765]	16835	P35951
ENSMUSG00000026466	3926.65	1747.34	6105.95	3.49442	1.80505	7.6898e-48	2.35463e-46	1	155880345	155912226	-	5406	Tor1aip1	GO:0005634;GO:0016020;GO:0016021;GO:0001671;GO:0001671;GO:0005515;GO:0005521;GO:0005521;GO:0005634;GO:0005634;GO:0005635;GO:0005635;GO:0005637;GO:0008092;GO:0016020;GO:0016021;GO:0031965;GO:0031965;GO:0032781;GO:0032781;GO:0051117;GO:0071763;GO:0090435;GO:0001671;GO:0001671;GO:0005515;GO:0005521;GO:0005634;GO:0005634;GO:0005635;GO:0005637;GO:0008092;GO:0016020;GO:0016021;GO:0031965;GO:0032781;GO:…	K23001	-	Z;U	0IJUB;0V845;0URZD;1CT7B;195K3;13NQE;1AS7N;0A10Q;0DNN8	torsin A interacting protein 1 [Source:MGI Symbol;Acc:MGI:3582693]	208263	Q921T2
ENSMUSG00000069662	5553.66	2076.28	9031.04	4.34962	2.12089	8.30001e-48	2.53626e-46	10	37009371	37014916	-	4048	Marcks	GO:0003779;GO:0005080;GO:0005516;GO:0005516;GO:0005516;GO:0005737;GO:0005737;GO:0005737;GO:0005813;GO:0005856;GO:0005886;GO:0005938;GO:0007015;GO:0007417;GO:0016020;GO:0016020;GO:0032432;GO:0032432;GO:0042585;GO:0042802;GO:0051015;GO:0051015;GO:0051017;GO:0051764;	K12561	-	Z;T	1D4ST;0UW6F;193TU;13U5Z;0DVD0;0A8YZ;1B6J2;0J04K;0VJVC	myristoylated alanine rich protein kinase C substrate [Source:MGI Symbol;Acc:MGI:96907]	17118	P26645
ENSMUSG00000017715	1805.05	728.114	2881.98	3.95814	1.98482	8.67741e-48	2.64617e-46	11	117877118	117914837	+	5333	Pgs1	GO:0000166;GO:0003824;GO:0005524;GO:0005739;GO:0005739;GO:0005739;GO:0005739;GO:0005783;GO:0005783;GO:0006629;GO:0006655;GO:0006655;GO:0008444;GO:0008444;GO:0008444;GO:0008444;GO:0008654;GO:0008654;GO:0016740;GO:0032049;GO:0032049;GO:0032049;GO:0046339;GO:0000166;GO:0003824;GO:0005524;GO:0005739;GO:0006629;GO:0006655;GO:0008444;GO:0008444;GO:0008654;GO:0016740;GO:0032049;GO:0000166;GO:0003824;GO:…	K00995	EC:2.7.8.5	H;I	0UJ1T;0V9SV;1B04F;0DNYD;09YV1;1CXVV;18W9N;KOG3964;12NB4	phosphatidylglycerophosphate synthase 1 [Source:MGI Symbol;Acc:MGI:1921701]	74451	Q8BHF7;B9EKS7
ENSMUSG00000039497	3959.15	1764.84	6153.45	3.48669	1.80186	8.88097e-48	2.70271e-46	10	34027389	34083711	-	4980	Dse	GO:0005654;GO:0005783;GO:0005794;GO:0005829;GO:0015012;GO:0016020;GO:0016021;GO:0016853;GO:0030204;GO:0030205;GO:0030206;GO:0030208;GO:0047757;GO:0047757;GO:0047757;GO:0016853;GO:0016853;	K01794	EC:5.1.3.19	G	12NM9;0V585;18XCS;1B2K8;0IKEY;0DFIR;0UGWR;1CQ8H;09U90	dermatan sulfate epimerase [Source:MGI Symbol;Acc:MGI:2443455]	212898	Q8BLI4
ENSMUSG00000019920	6034.95	1747.26	10322.6	5.90792	2.56265	1.08487e-47	3.29482e-46	10	58159288	58260513	+	5137	Lims1	GO:0005886;GO:0005925;GO:0016020;GO:0030054;GO:0005886;GO:0005925;GO:0016020;GO:0030054;GO:0046872;GO:0005886;GO:0005925;GO:0016020;GO:0030054;GO:0032991;GO:0044877;GO:0046872;GO:0005886;GO:0005925;GO:0016020;GO:0030054;GO:0046872;	K23354	-	T	1CQPI;18XV8;12TMT;0DG02;1AU2Z;KOG2272;0V5PR;09UQ4;0UIMX	LIM and senescent cell antigen-like domains 1 [Source:MGI Symbol;Acc:MGI:1195263]	110829	Q99JW4;A0A0R4J005
ENSMUSG00000028527	173.476	13.2622	333.69	25.1609	4.65311	1.30195e-47	3.94607e-46	4	101276474	101324192	+	4646	Ak4	GO:0000166;GO:0002082;GO:0002082;GO:0004017;GO:0004550;GO:0004550;GO:0004550;GO:0005524;GO:0005524;GO:0005525;GO:0005737;GO:0005739;GO:0005739;GO:0005739;GO:0005759;GO:0005759;GO:0005759;GO:0006139;GO:0006163;GO:0006165;GO:0006165;GO:0006165;GO:0006172;GO:0009142;GO:0009142;GO:0009142;GO:0016301;GO:0016310;GO:0016740;GO:0016776;GO:0019205;GO:0046033;GO:0046033;GO:0046033;GO:0046034;GO:0046034;GO:…	K00939	EC:2.7.4.3	F	1945X;13IR2;0UMTQ;0V8Q9;09XSR;1AX9Y;1CTWN;KOG3078;0DJ4R	adenylate kinase 4 [Source:MGI Symbol;Acc:MGI:87979]	11639	Q9WUR9;Q3U489
ENSMUSG00000050777	598.024	1031.84	164.205	0.159138	-2.65165	1.73103e-47	5.23594e-46	1	119995107	120001804	-	1311	Tmem37	GO:0005244;GO:0005244;GO:0005262;GO:0005262;GO:0006811;GO:0006816;GO:0016020;GO:0016021;GO:0016021;GO:0034765;GO:0070588;	-	-	P	1D15R;0IE8N;09UTS;0UH5U;0DRWY;0VF8R;1B403;13P6E;18XW6	transmembrane protein 37 [Source:MGI Symbol;Acc:MGI:2157899]	170706	Q9JJV3
ENSMUSG00000033487	3178.95	1396.03	4961.87	3.55428	1.82956	1.75079e-47	5.28498e-46	14	72775386	72947443	-	9944	Fndc3a	GO:0000139;GO:0001669;GO:0005794;GO:0005794;GO:0005829;GO:0007286;GO:0009566;GO:0012506;GO:0016020;GO:0016021;GO:0031410;GO:0060009;GO:0098609;GO:0016020;GO:0016021;	K24485	-	S	09UFN;0IE8R;1AU7Q;1CUHA;0DFRC;18U5H;0UNH4;0V5F0;12NQX	fibronectin type III domain containing 3A [Source:MGI Symbol;Acc:MGI:1196463]	319448	Q8BX90
ENSMUSG00000030474	562.834	61.1673	1064.5	17.4031	4.12127	2.02142e-47	6.08957e-46	7	43300494	43309585	-	1849	Siglece	GO:0005515;GO:0005515;GO:0005886;GO:0007155;GO:0007155;GO:0007155;GO:0009897;GO:0016020;GO:0016021;GO:0016021;GO:0030246;GO:0033691;GO:0033691;GO:0048029;GO:0050728;GO:0060101;GO:0016020;GO:0016021;	K10079	-	T	09W1I;0V6ZT;0IJT6;0DHAK;18VUR;1AUWN;0UJDS;13N43;1CS0N	sialic acid binding Ig-like lectin E [Source:MGI Symbol;Acc:MGI:1932475]	83382	Q91Y57
ENSMUSG00000062901	1551.32	2496.72	605.928	0.242689	-2.04282	2.38578e-47	7.17273e-46	16	19916292	19947971	+	10183	Klhl24	GO:0005737;GO:0005737;GO:0005737;GO:0005912;GO:0005912;GO:0005912;GO:0016567;GO:0016567;GO:0016567;GO:0030054;GO:0030057;GO:0030057;GO:0030057;GO:0030424;GO:0031463;GO:0031463;GO:0031463;GO:0042995;GO:0043204;GO:0045109;GO:0045109;GO:0045109;GO:0051865;GO:0051865;GO:0051865;GO:2000312;GO:2000312;GO:2000312;	K10461	-	T	09UF7;0UJH7;0DM9H;18ZYA;1AS70;0VAMZ;13K5B;1CW4N;KOG4441	kelch-like 24 [Source:MGI Symbol;Acc:MGI:1923035]	75785	Q8BRG6
ENSMUSG00000005973	674.256	206.853	1141.66	5.51918	2.46445	2.5381e-47	7.61533e-46	2	105216636	105229664	-	3196	Rcn1	GO:0001701;GO:0005509;GO:0005509;GO:0005783;GO:0005783;GO:0005783;GO:0005783;GO:0005788;GO:0043010;GO:0046872;	K23898	-	T;U	1AUBN;0DF13;0V4Q6;KOG4223;18XBN;12PP3;09TQW;0USNY;1CPQY	reticulocalbin 1 [Source:MGI Symbol;Acc:MGI:104559]	19672	Q05186
ENSMUSG00000075284	2237.52	3537.72	937.324	0.264951	-1.9162	2.54744e-47	7.628e-46	2	73259954	73360078	-	5896	Wipf1	GO:0001726;GO:0003779;GO:0003779;GO:0005515;GO:0005737;GO:0005856;GO:0005884;GO:0005884;GO:0008154;GO:0015629;GO:0015629;GO:0017124;GO:0017124;GO:0030036;GO:0030048;GO:0030048;GO:0031410;GO:0042995;GO:0046827;GO:0051707;GO:0001726;GO:0003779;GO:0003779;GO:0005515;GO:0005737;GO:0005856;GO:0005884;GO:0005884;GO:0008154;GO:0015629;GO:0015629;GO:0017124;GO:0030036;GO:0030048;GO:0030048;GO:0031410;GO:…	K19475	-	Z	0A07J;12PJ5;1B0WA;0DMU4;1CWPH;KOG4462;0UR19;193G6;0VB3I	WAS/WASL interacting protein family, member 1 [Source:MGI Symbol;Acc:MGI:2178801]	215280	Q8K1I7
ENSMUSG00000040782	3170.89	1078.63	5263.14	4.87945	2.28672	2.57598e-47	7.69801e-46	1	159059890	159175210	+	17516	Cop1	GO:0016567;GO:0061630;GO:0000139;GO:0000139;GO:0005515;GO:0005515;GO:0005634;GO:0005737;GO:0010212;GO:0010212;GO:0016567;GO:0016607;GO:0016740;GO:0031464;GO:0031464;GO:0032436;GO:0032436;GO:0043161;GO:0043161;GO:0046872;GO:0061630;GO:0061630;GO:0061630;GO:0016567;GO:0046872;GO:0061630;GO:0016567;GO:0061630;GO:0016567;GO:0061630;GO:0016567;GO:0061630;	K10143	EC:2.3.2.27	O	0V58W;1CQ95;12NMJ;1AVAX;09U9Q;18U0U;0DFJE;0IE71;0UJTZ	COP1, E3 ubiquitin ligase [Source:MGI Symbol;Acc:MGI:1347046]	26374	Q9R1A8
ENSMUSG00000041827	6918.14	84.7	13751.6	162.356	7.34302	2.96057e-47	8.82962e-46	5	115061299	115075974	+	2608	Oasl1	GO:0002376;GO:0003677;GO:0003677;GO:0003723;GO:0003725;GO:0003725;GO:0003725;GO:0005634;GO:0005654;GO:0005654;GO:0005730;GO:0005730;GO:0005737;GO:0005737;GO:0005829;GO:0005829;GO:0009615;GO:0009615;GO:0016020;GO:0016779;GO:0045071;GO:0045071;GO:0045087;GO:0051607;GO:0051607;GO:0051607;GO:0051607;GO:0060700;GO:0002376;GO:0003677;GO:0003677;GO:0003723;GO:0003725;GO:0003725;GO:0003725;GO:0005634;GO:…	K14608	-	J;O	0DF4M;0V4TK;1CP6T;1947B;KOG0001;1B0SC;09TUC;12QYV;0UGA6	2'-5' oligoadenylate synthetase-like 1 [Source:MGI Symbol;Acc:MGI:2180849]	231655	Q8VI94
ENSMUSG00000043279	2006.15	829.571	3182.72	3.83658	1.93982	3.57754e-47	1.06484e-45	5	137134498	137145063	-	9281	Trim56	GO:0005737;GO:0008270;GO:0046872;GO:0008270;GO:0046872;	K12026	EC:2.3.2.27	O	0B69D;0ITEJ;0WIZ6;0V3SY;197FE;0E9EC;1BBG0;1DG9N;13FX6	tripartite motif-containing 56 [Source:MGI Symbol;Acc:MGI:2685298]	384309	Q80VI1;A0A0R4J0Q6
ENSMUSG00000020869	7607.83	3556.88	11658.8	3.27782	1.71273	3.66557e-47	1.08886e-45	11	94520593	94536042	+	3073	Lrrc59	GO:0005634;GO:0005635;GO:0005783;GO:0005783;GO:0005783;GO:0005789;GO:0016020;GO:0016021;GO:0031090;GO:0042645;GO:0042645;GO:0043231;	-	-	S	0URC7;18WT6;0VAC8;0DKXK;12ZPM;KOG0473;1CVSR;1AS5W;09ZF9	leucine rich repeat containing 59 [Source:MGI Symbol;Acc:MGI:2138133]	98238	Q922Q8
ENSMUSG00000029007	1939.58	803.153	3076.01	3.82992	1.93731	3.75165e-47	1.11222e-45	4	148161518	148172488	-	4236	Agtrap	GO:0000139;GO:0001666;GO:0004945;GO:0005515;GO:0005654;GO:0005783;GO:0005789;GO:0005794;GO:0005794;GO:0005829;GO:0005886;GO:0005886;GO:0005938;GO:0008217;GO:0008217;GO:0016020;GO:0016021;GO:0030659;GO:0031410;GO:0038166;GO:0042802;GO:0043231;GO:0043231;	-	-	T	1D2NB;0IYP8;13T43;0A7DF;0DU6X;1B1M8;0VI4N;193BH;0UN3F	angiotensin II, type I receptor-associated protein [Source:MGI Symbol;Acc:MGI:1339977]	11610	Q9WVK0
ENSMUSG00000004105	1521.08	2665.43	376.738	0.141342	-2.82273	4.66121e-47	1.37913e-45	2	33106081	33137729	+	6286	Angptl2	GO:0001525;GO:0005102;GO:0005576;GO:0005615;GO:0005615;GO:0062023;	-	-	S;T;E	0DH5X;1B35P;1CRW5;13DWM;0V6W2;0UNZ8;KOG2579;09VXJ;18XZR	angiopoietin-like 2 [Source:MGI Symbol;Acc:MGI:1347002]	26360	Q9R045
ENSMUSG00000073910	363.667	77.363	649.971	8.40158	3.07066	5.07652e-47	1.49903e-45	4	34949074	35157484	-	6200	Mob3b	GO:0003674;GO:0005575;GO:0035330;GO:0035330;GO:0046872;	-	-	D	1947T;12Q3F;1CR3B;0DGDT;1AYFG;0UI56;KOG1903;0V64B;09V4P	MOB kinase activator 3B [Source:MGI Symbol;Acc:MGI:2664539]	214944	Q8VE04
ENSMUSG00000040296	3028.39	355.112	5701.66	16.0559	4.00503	1.62397e-46	4.78591e-45	4	40203773	40239828	-	7050	Ddx58	GO:0000166;GO:0002230;GO:0002230;GO:0002376;GO:0002735;GO:0003677;GO:0003690;GO:0003723;GO:0003724;GO:0003725;GO:0003725;GO:0003725;GO:0003727;GO:0003727;GO:0003727;GO:0004386;GO:0005515;GO:0005515;GO:0005524;GO:0005524;GO:0005737;GO:0005737;GO:0005737;GO:0005829;GO:0005829;GO:0005856;GO:0005886;GO:0005886;GO:0005923;GO:0005923;GO:0008270;GO:0008270;GO:0008270;GO:0009597;GO:0009615;GO:0009615;GO:…	K12646	EC:3.6.4.13	A;K	1ATHZ;0V4TZ;KOG0354;0DQ4Z;12NQ7;18ZIS;0UTEU;1CZ68;09TUS	DEAD/H box helicase 58 [Source:MGI Symbol;Acc:MGI:2442858]	230073	Q6Q899;A1L0V6
ENSMUSG00000031701	3816.56	1722.62	5910.49	3.4311	1.77867	1.85086e-46	5.4438e-45	8	86264262	86281973	-	2975	Dnaja2	GO:0001671;GO:0001671;GO:0001671;GO:0005524;GO:0005634;GO:0005829;GO:0005829;GO:0005829;GO:0006457;GO:0009408;GO:0016020;GO:0031072;GO:0032781;GO:0042026;GO:0042026;GO:0046872;GO:0051082;GO:0051082;GO:0051082;GO:0051087;GO:0051087;	K09503	-	O	0UM7F;0DIN9;18XKN;0V62A;1AWPH;12NR7;KOG0712;1CTD5;09UMX	DnaJ heat shock protein family (Hsp40) member A2 [Source:MGI Symbol;Acc:MGI:1931882]	56445	Q9QYJ0
ENSMUSG00000028894	1693.54	628.654	2758.43	4.38784	2.13351	1.91442e-46	5.61966e-45	4	124635643	124695304	+	4657	Inpp5b	GO:0001701;GO:0004439;GO:0004439;GO:0004439;GO:0004439;GO:0004445;GO:0005737;GO:0005768;GO:0005793;GO:0005829;GO:0005829;GO:0005829;GO:0005829;GO:0007165;GO:0007283;GO:0016020;GO:0016020;GO:0016020;GO:0016020;GO:0016021;GO:0016787;GO:0030317;GO:0030670;GO:0031410;GO:0031901;GO:0046855;GO:0046856;GO:0046856;GO:0046856;GO:0046856;GO:0046856;GO:0046872;GO:0052658;GO:0052658;GO:0052658;GO:0052658;GO:…	K01099	EC:3.1.3.36	T;U	KOG4270;0V9Z6;1CPWF;0UGD4;0DF6X;09Z1Q;KOG0565;18U8T;1AS5G;12S2S	inositol polyphosphate-5-phosphatase B [Source:MGI Symbol;Acc:MGI:103257]	16330	Q8K337
ENSMUSG00000024675	276.931	3.36182	550.501	163.751	7.35536	2.30549e-46	6.75433e-45	19	11382134	11404610	+	1751	Ms4a4c	GO:0003674;GO:0005575;GO:0008150;GO:0016020;GO:0016021;GO:0003674;GO:0005575;GO:0008150;GO:0016020;GO:0016021;GO:0016021;GO:0003674;GO:0005575;GO:0008150;GO:0016020;GO:0016021;GO:0016021;	K22190	-	S	1967A;1AWM6;1CTBK;0DIKP;0UM5X;0VHG7;13UNP;0A6N2;0J084	membrane-spanning 4-domains, subfamily A, member 4C [Source:MGI Symbol;Acc:MGI:1927656]	64380	Q9D3F6
ENSMUSG00000034731	1099.49	407.63	1791.36	4.39456	2.13572	2.43413e-46	7.1172e-45	14	78796190	78970216	-	16975	Dgkh	GO:0000166;GO:0003951;GO:0004143;GO:0004143;GO:0004143;GO:0005524;GO:0005737;GO:0005768;GO:0005886;GO:0007165;GO:0007205;GO:0007205;GO:0016301;GO:0016301;GO:0016310;GO:0016740;GO:0035556;GO:0043231;GO:0046473;GO:0046486;GO:0046872;GO:0000166;GO:0003951;GO:0004143;GO:0004143;GO:0004143;GO:0004143;GO:0005524;GO:0005737;GO:0005737;GO:0005768;GO:0005856;GO:0005886;GO:0006654;GO:0007165;GO:0007205;GO:…	K00901	EC:2.7.1.107	I	0UPXZ;0V7XP;1CUXR;0DK3Y;KOG1170;1AZWQ;12NWP;190KE;09WZQ	diacylglycerol kinase, eta [Source:MGI Symbol;Acc:MGI:2444188]	380921	D3YXJ0
ENSMUSG00000047888	410.793	732.832	88.7534	0.12111	-3.04561	2.56738e-46	7.49211e-45	15	80595514	80825286	+	23677	Tnrc6b	GO:0000932;GO:0000932;GO:0003676;GO:0003723;GO:0005654;GO:0005737;GO:0006417;GO:0031047;GO:0031047;GO:0031047;GO:0035195;GO:0035278;GO:0060213;GO:0060213;GO:0060213;GO:1900153;GO:1900153;GO:1905618;GO:1905618;GO:1905618;GO:0003676;GO:0031047;GO:0035278;	K18412	-	S	18YGN;1CVUJ;0VAE4;0UQ29;12S0X;09ZGY;0DKZR;1AS9U;0IET2	trinucleotide repeat containing 6b [Source:MGI Symbol;Acc:MGI:2443730]	213988	Q8BKI2;Q8VD67;Q8BX83;Q8BWL0
ENSMUSG00000020593	225.056	427.863	22.2493	0.0520011	-4.26532	3.79997e-46	1.10674e-44	12	16585670	16696967	-	9930	Lpin1	GO:0006357;GO:0008195;GO:0008195;GO:0009062;GO:0016311;GO:0016787;GO:0019432;GO:0006357;GO:0008195;GO:0008195;GO:0009062;GO:0016311;GO:0016787;GO:0019432;GO:0006357;GO:0008195;GO:0008195;GO:0009062;GO:0016311;GO:0016787;GO:0019432;GO:0006357;GO:0008195;GO:0008195;GO:0009062;GO:0016311;GO:0016787;GO:0019432;GO:0031100;GO:0032869;GO:0006357;GO:0008195;GO:0008195;GO:0009062;GO:0016311;GO:0016787;GO:…	K15728	EC:3.1.3.4	N;K;I	0V77W;0DHIV;18XB2;0UKXQ;1CU51;KOG2116;1AWDZ;09W9K;12PNV	lipin 1 [Source:MGI Symbol;Acc:MGI:1891340]	14245	Q91ZP3;E9QKQ5
ENSMUSG00000046245	1311.22	63.2647	2559.17	40.4518	5.33813	6.8212e-46	1.9828e-44	5	137820214	137834543	-	3090	Pilra	GO:0005515;GO:0007165;GO:0016020;GO:0016021;GO:0042288;GO:0005515;GO:0007165;GO:0016020;GO:0016021;GO:0042288;	K15411	-	T	13Q66;1B5KT;1D2XQ;0A6ZA;0IW80;0VHUD;0DTQH;1934A;0UV2T	paired immunoglobin-like type 2 receptor alpha [Source:MGI Symbol;Acc:MGI:2450529]	231805	Q2YFS3
ENSMUSG00000026110	1335.08	522.429	2147.73	4.11105	2.03951	6.96189e-46	2.01976e-44	1	37478421	37580097	-	12881	Mgat4a	GO:0000139;GO:0005576;GO:0005783;GO:0005793;GO:0005794;GO:0005795;GO:0006486;GO:0006487;GO:0006487;GO:0008375;GO:0008375;GO:0008454;GO:0016020;GO:0016021;GO:0016740;GO:0016757;GO:0016757;GO:0018215;GO:0046872;GO:0000139;GO:0005576;GO:0005783;GO:0005793;GO:0005794;GO:0005795;GO:0006486;GO:0006487;GO:0006487;GO:0008375;GO:0008375;GO:0008454;GO:0016020;GO:0016021;GO:0016740;GO:0016757;GO:0016757;GO:…	K00738	EC:2.4.1.145	G	1CW81;12PV7;0IEDC;09WCV;18ZST;0UM5W;0DK6M;0V7BB;1B01I	mannoside acetylglucosaminyltransferase 4, isoenzyme A [Source:MGI Symbol;Acc:MGI:2662992]	269181	Q812G0
ENSMUSG00000024235	1032.4	379.046	1685.75	4.44736	2.15295	9.59691e-46	2.77882e-44	18	4331327	4353015	-	4504	Map3k8	GO:0000165;GO:0000166;GO:0000186;GO:0000287;GO:0002376;GO:0004672;GO:0004674;GO:0004709;GO:0004709;GO:0004709;GO:0005524;GO:0005524;GO:0005737;GO:0005737;GO:0005829;GO:0005829;GO:0006468;GO:0007049;GO:0007165;GO:0016301;GO:0016310;GO:0016740;GO:0046872;GO:0000165;GO:0000166;GO:0000186;GO:0004674;GO:0004709;GO:0005524;GO:0006468;GO:0016301;GO:0016310;GO:0016740;	K04415	EC:2.7.11.25	T	09V8E;18W6F;1CR6N;KOG0201;12PQ1;1B230;0V67Y;0UIAF;0DGH0	mitogen-activated protein kinase kinase kinase 8 [Source:MGI Symbol;Acc:MGI:1346878]	26410	Q07174;Q3UEB8
ENSMUSG00000028937	752.224	247.692	1256.76	5.07387	2.34309	1.09064e-45	3.15186e-44	4	152262591	152356312	+	2124	Acot7	GO:0000062;GO:0005654;GO:0005654;GO:0005737;GO:0005737;GO:0005829;GO:0005829;GO:0005829;GO:0006629;GO:0006631;GO:0006631;GO:0006637;GO:0009062;GO:0015937;GO:0016290;GO:0016290;GO:0016290;GO:0016787;GO:0016790;GO:0036042;GO:0036042;GO:0036114;GO:0036116;GO:0042803;GO:0043005;GO:0044297;GO:0047617;GO:0047617;GO:0051792;GO:0052689;GO:0102991;GO:1900535;GO:1900535;GO:0000062;GO:0005654;GO:0005829;GO:…	K17360	EC:3.1.2.2	I	1CX8C;KOG2763;0DNBB;18X4E;1B06J;0A0Q0;13JVH;0VBK6;0UPHD	acyl-CoA thioesterase 7 [Source:MGI Symbol;Acc:MGI:1917275]	70025	Q91V12;E9PYH2
ENSMUSG00000015745	1730.35	2751.29	709.41	0.257847	-1.95541	1.38773e-45	4.00267e-44	3	95895741	95903313	-	2172	Plekho1	GO:0005515;GO:0005634;GO:0005737;GO:0005886;GO:0007520;GO:0008360;GO:0016020;GO:0032587;GO:0036195;GO:0051451;GO:0072673;GO:0005634;GO:0005737;GO:0016020;GO:0005634;GO:0005737;GO:0016020;GO:0005634;GO:0005737;GO:0016020;	K24022	-	T	09YDK;18V1Y;0V9B6;1CUKK;13M6S;0IEJU;0DJTG;1AU17;0UINF	pleckstrin homology domain containing, family O member 1 [Source:MGI Symbol;Acc:MGI:1914470]	67220	Q9JIY0
ENSMUSG00000049988	2315.09	1000.21	3629.96	3.6292	1.85965	1.58489e-45	4.56254e-44	8	71068805	71074133	+	2039	Lrrc25	GO:0003674;GO:0005575;GO:0005737;GO:0008150;GO:0016020;GO:0016021;	-	-	S	193A4;09XMN;0DIZ9;1AX49;0V8JB;140V3;0UMMP;0J965;1CTQP	leucine rich repeat containing 25 [Source:MGI Symbol;Acc:MGI:2445284]	211228	Q8K1T1;B9EHD0
ENSMUSG00000042901	1490.37	598.603	2382.14	3.9795	1.99259	1.67133e-45	4.80211e-44	1	183078134	183106331	+	6175	Aida	GO:0005515;GO:0005737;GO:0007275;GO:0009953;GO:0009953;GO:0016020;GO:0019904;GO:0031333;GO:0035091;GO:0043254;GO:0043508;GO:0043508;GO:0046329;GO:0046329;GO:0048264;GO:0048264;GO:2000016;GO:0005515;GO:0005737;GO:0007275;GO:0009953;GO:0009953;GO:0016020;GO:0019904;GO:0031333;GO:0035091;GO:0043254;GO:0043508;GO:0046329;GO:0046329;GO:0048264;GO:0048264;GO:2000016;	-	-	T	0IJ07;0VCEJ;13E2U;1B4ZR;0USJD;19547;0A1IY;1CY51;0DP70	axin interactor, dorsalization associated [Source:MGI Symbol;Acc:MGI:1919737]	108909	Q8C4Q6
ENSMUSG00000004359	326.454	66.294	586.614	8.84867	3.14546	3.37063e-45	9.66594e-44	10	88510634	88520877	-	3841	Spic	GO:0000978;GO:0000981;GO:0001228;GO:0001824;GO:0003677;GO:0003700;GO:0005634;GO:0005634;GO:0006355;GO:0006357;GO:0030154;GO:0043565;GO:0045944;GO:0045944;GO:0003677;GO:0003700;GO:0006355;GO:0043565;	K09440	-	K	0A1FR;1CYUC;KOG3805;0DPV1;1AZPN;13H91;0UMZP;0VD2P;192QV	Spi-C transcription factor (Spi-1/PU.1 related) [Source:MGI Symbol;Acc:MGI:1341168]	20728	Q6P3D7
ENSMUSG00000090877	163.195	12.5563	313.834	24.9942	4.64352	3.48538e-45	9.97582e-44	17	35175412	35178214	-	2803	Hspa1b	GO:0000166;GO:0002199;GO:0005515;GO:0005515;GO:0005524;GO:0005524;GO:0005634;GO:0005737;GO:0005737;GO:0005739;GO:0005759;GO:0005813;GO:0005815;GO:0005829;GO:0005856;GO:0005886;GO:0006457;GO:0007339;GO:0008180;GO:0009408;GO:0016192;GO:0016887;GO:0031072;GO:0031625;GO:0032436;GO:0034620;GO:0042026;GO:0042026;GO:0043066;GO:0043154;GO:0044183;GO:0044183;GO:0044297;GO:0051082;GO:0051085;GO:0051787;GO:…	K03283	-	-	-	heat shock protein 1B [Source:MGI Symbol;Acc:MGI:99517]	15511	P17879
ENSMUSG00000047881	641.564	1091.03	192.099	0.176072	-2.50577	4.02681e-45	1.15034e-43	5	64066240	64126240	-	3856	Rell1	GO:0003674;GO:0005886;GO:0005886;GO:0005886;GO:0005886;GO:0015630;GO:0015630;GO:0016020;GO:0016021;GO:1900745;GO:1900745;GO:1900745;GO:1900745;GO:1900745;	-	-	U	09ZMD;1CW07;1ATDT;0DM52;0VAI1;0IGV6;13N8R;0UNXE;18TSU	RELT-like 1 [Source:MGI Symbol;Acc:MGI:2140767]	100532	Q8K2J7
ENSMUSG00000050029	1747.48	728.052	2766.92	3.80044	1.92617	4.61197e-45	1.31498e-43	X	50092789	50106895	-	3545	Rap2c	GO:0000166;GO:0003713;GO:0003713;GO:0003924;GO:0003924;GO:0005525;GO:0005525;GO:0005525;GO:0005525;GO:0005525;GO:0005737;GO:0005737;GO:0005737;GO:0005768;GO:0005829;GO:0005886;GO:0005886;GO:0005886;GO:0005923;GO:0005923;GO:0007165;GO:0016020;GO:0016020;GO:0016020;GO:0016787;GO:0019003;GO:0019003;GO:0019003;GO:0030336;GO:0030336;GO:0031954;GO:0032486;GO:0032486;GO:0032486;GO:0044291;GO:0044291;GO:…	K07839	-	S;J	1AYXM;0V7XB;0DI9U;0UKQK;190GV;1CT0A;09WZA;KOG0395;12RFZ	RAP2C, member of RAS oncogene family [Source:MGI Symbol;Acc:MGI:1919315]	72065	Q8BU31
ENSMUSG00000025993	4975.25	7620.6	2329.91	0.305738	-1.70963	5.52751e-45	1.57302e-43	1	45947228	45965683	-	9000	Slc40a1	GO:0002260;GO:0003158;GO:0005381;GO:0005381;GO:0005381;GO:0005381;GO:0005515;GO:0005515;GO:0005654;GO:0005829;GO:0005886;GO:0005886;GO:0006811;GO:0006826;GO:0006879;GO:0008021;GO:0015093;GO:0016020;GO:0016021;GO:0016021;GO:0016323;GO:0016323;GO:0016323;GO:0017046;GO:0017046;GO:0017046;GO:0034395;GO:0034755;GO:0034755;GO:0034755;GO:0042802;GO:0043066;GO:0045944;GO:0048536;GO:0055072;GO:0055072;GO:…	K14685	-	P	0UPST;0DGIK;12RU2;1CVKR;18TDK;09Z9U;0VA70;1ASSS;KOG2601	solute carrier family 40 (iron-regulated transporter), member 1 [Source:MGI Symbol;Acc:MGI:1315204]	53945	Q9JHI9
ENSMUSG00000025154	2830.41	5569.34	91.4798	0.0164256	-5.92791	5.61153e-45	1.59389e-43	19	41755027	41790486	-	5103	Arhgap19	GO:0005096;GO:0005096;GO:0005737;GO:0005886;GO:0007165;GO:0043231;GO:0043547;GO:0051056;GO:0007165;GO:0005096;GO:0005096;GO:0005737;GO:0005886;GO:0007165;GO:0043231;GO:0043547;GO:0051056;	K20640	-	T	0E84X;1975Z;0WGNE;0B467;0V31V;1DF3W;1BAXX;13CNI;0IPRZ	Rho GTPase activating protein 19 [Source:MGI Symbol;Acc:MGI:1918335]	71085	Q8BRH3
ENSMUSG00000040663	309.992	61.3866	558.598	9.09968	3.18582	6.02744e-45	1.70877e-43	19	4264292	4273544	+	3806	Clcf1	GO:0002639;GO:0002830;GO:0005102;GO:0005102;GO:0005102;GO:0005125;GO:0005125;GO:0005125;GO:0005125;GO:0005127;GO:0005127;GO:0005127;GO:0005515;GO:0005515;GO:0005576;GO:0005576;GO:0005576;GO:0005576;GO:0005576;GO:0005615;GO:0007166;GO:0007166;GO:0007259;GO:0007259;GO:0008284;GO:0008284;GO:0008284;GO:0030183;GO:0030890;GO:0030890;GO:0042531;GO:0042531;GO:0042531;GO:0042531;GO:0043524;GO:0043524;GO:…	K05421	-	W;T	13QUJ;0VFD4;0DNAE;1ASI0;0UGU6;1CX7B;18T5Y;0IVWG;0A3N0	cardiotrophin-like cytokine factor 1 [Source:MGI Symbol;Acc:MGI:1930088]	56708	Q9QZM3
ENSMUSG00000034041	380.033	679.999	80.0666	0.117745	-3.08626	6.17407e-45	1.74702e-43	8	85428078	85431569	+	2033	Lyl1	GO:0046983;GO:0000785;GO:0000978;GO:0000981;GO:0001955;GO:0001955;GO:0001955;GO:0003677;GO:0003677;GO:0003677;GO:0005634;GO:0006355;GO:0006355;GO:0006355;GO:0006357;GO:0030183;GO:0045893;GO:0045893;GO:0045893;GO:0046983;GO:0060216;	K15604	-	K	KOG4029;1AY1S;0V8ES;0UMG2;1CTJM;13NX1;0DIU9;1903B;09XGR	lymphoblastomic leukemia 1 [Source:MGI Symbol;Acc:MGI:96891]	17095	P27792
ENSMUSG00000031444	1687.67	150.761	3224.57	21.3886	4.41877	8.83281e-45	2.4946e-43	8	13087308	13106676	+	2731	F10	GO:0004252;GO:0004252;GO:0004252;GO:0005509;GO:0005543;GO:0005576;GO:0005576;GO:0005615;GO:0005783;GO:0006508;GO:0006508;GO:0007596;GO:0007596;GO:0007596;GO:0007596;GO:0007599;GO:0008233;GO:0008236;GO:0016020;GO:0016787;GO:0043231;GO:0051897;GO:0004252;GO:0004252;GO:0005509;GO:0005543;GO:0005576;GO:0005576;GO:0006508;GO:0006508;GO:0007596;GO:0007596;GO:0007599;GO:0008233;GO:0008236;GO:0016787;GO:…	K01314	EC:3.4.21.6	O	1B0HW;09V8X;12TMD;0UK0W;0DH34;1CRTD;18VEJ;0V6TJ;0IGPV	coagulation factor X [Source:MGI Symbol;Acc:MGI:103107]	14058	O88947;Q3TBR2
ENSMUSG00000052085	3957.56	6083.54	1831.58	0.301072	-1.73182	1.40289e-44	3.9546e-43	19	24976898	25179796	+	10070	Dock8	GO:0001771;GO:0005085;GO:0005085;GO:0005085;GO:0005085;GO:0005515;GO:0005737;GO:0005737;GO:0005737;GO:0005886;GO:0007264;GO:0016020;GO:0031252;GO:0031256;GO:0031256;GO:0031258;GO:0036336;GO:0036336;GO:0042995;GO:0043547;GO:0043547;GO:0061485;GO:0061485;GO:0070233;GO:1903905;GO:1903905;GO:1903905;GO:1990869;GO:1990869;GO:2000406;GO:2000406;GO:2000406;	K21852	-	T	1BAP0;13B5E;0B38P;19714;1DEJP;KOG1997;0V2PV;0WFKS;0E7J7	dedicator of cytokinesis 8 [Source:MGI Symbol;Acc:MGI:1921396]	76088	Q8C147
ENSMUSG00000029366	1178.34	282.568	2074.11	7.34021	2.87582	1.58775e-44	4.46727e-43	5	88912855	88931140	+	3781	Dck	GO:0000166;GO:0000287;GO:0004136;GO:0004137;GO:0004137;GO:0004137;GO:0004138;GO:0005524;GO:0005524;GO:0005524;GO:0005634;GO:0005654;GO:0005654;GO:0005737;GO:0005739;GO:0005829;GO:0006139;GO:0006170;GO:0006220;GO:0006220;GO:0008144;GO:0009157;GO:0016301;GO:0016310;GO:0016740;GO:0019136;GO:0019136;GO:0032548;GO:0042803;GO:0046092;GO:0046939;	K00893	EC:2.7.1.74	F	KOG4235;0DGV8;1CRJA;1B00U;09VKP;18ZKC;0UQPN;0V6JU;12PCY	deoxycytidine kinase [Source:MGI Symbol;Acc:MGI:102726]	13178	P43346;Q545E8
ENSMUSG00000047735	6449.08	1231.54	11666.6	9.47317	3.24385	2.12913e-44	5.97921e-43	6	3372257	3399572	-	5427	Samd9l	-	K23949	-	S	13G0G;0V4EM;0UNY9;1AYG8;09TFI;18UK2;1CPGA;0IETT;0DESJ	sterile alpha motif domain containing 9-like [Source:MGI Symbol;Acc:MGI:1343184]	209086	E9PX59;Q8BZG4
ENSMUSG00000056153	1649.75	2962.85	336.643	0.113621	-3.1377	2.35708e-44	6.6069e-43	18	88683348	88945605	-	11349	Socs6	GO:0001772;GO:0001772;GO:0005515;GO:0005515;GO:0005515;GO:0005829;GO:0005942;GO:0005942;GO:0009968;GO:0010498;GO:0010498;GO:0016567;GO:0016567;GO:0035556;GO:0040008;GO:0040008;GO:0040008;GO:0043551;GO:0046854;GO:0046854;GO:0046935;GO:0046935;GO:0050868;GO:0001772;GO:0005515;GO:0005515;GO:0005515;GO:0005829;GO:0005942;GO:0005942;GO:0009968;GO:0010498;GO:0016567;GO:0016567;GO:0035556;GO:0040008;GO:…	K04699	-	T	13HHP;0DNEK;1CXBX;0VBPX;KOG4566;1920D;0UIE0;1B1ZT;0A0TB	suppressor of cytokine signaling 6 [Source:MGI Symbol;Acc:MGI:1924885]	54607	Q9JLY0
ENSMUSG00000021701	5988.94	2871.55	9106.32	3.17122	1.66504	4.53013e-44	1.26742e-42	13	110531580	110537378	+	4491	Plk2	GO:0000082;GO:0000082;GO:0000082;GO:0000082;GO:0000166;GO:0000278;GO:0000278;GO:0000785;GO:0000922;GO:0004672;GO:0004674;GO:0004674;GO:0004674;GO:0004674;GO:0004674;GO:0005524;GO:0005524;GO:0005634;GO:0005737;GO:0005737;GO:0005737;GO:0005737;GO:0005813;GO:0005813;GO:0005813;GO:0005813;GO:0005814;GO:0005814;GO:0005814;GO:0005814;GO:0005856;GO:0006468;GO:0006468;GO:0006468;GO:0006468;GO:0006468;GO:…	K08861	EC:2.7.11.21	D	18SP6;0DJU6;0V605;09V0D;0UNVK;1B4GS;1CUT9;KOG0575;12PB0	polo like kinase 2 [Source:MGI Symbol;Acc:MGI:1099790]	20620	P53351;Q548A9;Q3TV29
ENSMUSG00000035692	2912.94	42.8263	5783.06	135.035	7.07719	5.21179e-44	1.4554e-42	4	156283912	156285253	-	703	Isg15	GO:0005178;GO:0005178;GO:0005178;GO:0005515;GO:0005515;GO:0005576;GO:0005576;GO:0005576;GO:0005634;GO:0005737;GO:0005737;GO:0007229;GO:0007229;GO:0007229;GO:0009617;GO:0019941;GO:0019941;GO:0022627;GO:0030501;GO:0031386;GO:0031386;GO:0031397;GO:0031397;GO:0031397;GO:0031625;GO:0032020;GO:0032020;GO:0032020;GO:0032020;GO:0032609;GO:0032613;GO:0032649;GO:0032649;GO:0032649;GO:0034340;GO:0034340;GO:…	K12159	-	O	0DTRB;193EP;0UUZS;KOG0001;13VQF;1B5MQ;0VI08;1D338;0A6PP	ISG15 ubiquitin-like modifier [Source:MGI Symbol;Acc:MGI:1855694]	100038882	Q64339;Q4FJR9
ENSMUSG00000020260	1685.44	707.501	2663.37	3.76448	1.91245	6.94595e-44	1.93604e-42	10	77095052	77105409	+	7878	Pofut2	GO:0001707;GO:0005783;GO:0005794;GO:0005794;GO:0005794;GO:0005975;GO:0006004;GO:0006486;GO:0008417;GO:0010468;GO:0010717;GO:0016740;GO:0016757;GO:0036065;GO:0036066;GO:0036066;GO:0036066;GO:0046922;GO:0046922;GO:0046922;GO:0046922;GO:0051046;GO:0051046;GO:1903334;GO:1903334;GO:0005783;GO:0006004;GO:0006486;GO:0016740;GO:0036066;GO:0046922;GO:0005783;GO:0006004;GO:0006486;GO:0016740;GO:0036066;GO:…	K03691	EC:2.4.1.221	O	0DK4R;09YQC;12RRA;1ASUA;0V9N4;0UH5X;191HT;0IFPR;1CUYJ	protein O-fucosyltransferase 2 [Source:MGI Symbol;Acc:MGI:1916863]	80294	Q8VHI3;B2RV73
ENSMUSG00000033220	7594.55	3683.76	11505.3	3.12326	1.64305	1.01738e-43	2.83044e-42	15	78443367	78456983	-	3103	Rac2	GO:0000166;GO:0003924;GO:0003924;GO:0003924;GO:0005525;GO:0005525;GO:0005525;GO:0005525;GO:0005525;GO:0005635;GO:0005737;GO:0005737;GO:0005829;GO:0005829;GO:0005856;GO:0005884;GO:0005884;GO:0005886;GO:0005938;GO:0006935;GO:0007015;GO:0007015;GO:0007015;GO:0007163;GO:0007186;GO:0007264;GO:0008045;GO:0008284;GO:0008360;GO:0010592;GO:0010592;GO:0010592;GO:0010810;GO:0010810;GO:0016020;GO:0016020;GO:…	K07860	-	Z;S;T	0V62F;1CTM0;0DIVP;09V2T;18Z63;0UNQQ;1AY79;KOG0393;12N5X	Rac family small GTPase 2 [Source:MGI Symbol;Acc:MGI:97846]	19354	Q05144
ENSMUSG00000037965	3260.62	1500.09	5021.15	3.34723	1.74297	1.3009e-43	3.61248e-42	16	10954456	10994257	-	9160	Zc3h7a	GO:0005575;GO:0010608;GO:0010608;GO:0035196;GO:0035196;GO:0035196;GO:0035198;GO:0035198;GO:0035198;GO:0035198;GO:0046872;GO:0046872;GO:0005575;GO:0010608;GO:0035196;GO:0035196;GO:0035198;GO:0035198;GO:0035198;GO:0046872;GO:0046872;GO:0005575;GO:0010608;GO:0035196;GO:0035196;GO:0035198;GO:0035198;GO:0035198;GO:0005575;GO:0010608;GO:0035196;GO:0035196;GO:0035198;GO:0035198;GO:0035198;GO:0046872;GO:…	-	-	S	0V65D;13JTB;0DGET;0IDY2;1AYKT;18W97;0UI71;1CR4B;09V5T	zinc finger CCCH type containing 7 A [Source:MGI Symbol;Acc:MGI:2445044]	106205	Q3UBH9
ENSMUSG00000025321	271.612	7.78256	535.441	68.8001	6.10434	1.74181e-43	4.82786e-42	12	119121757	119202537	-	11060	Itgb8	GO:0001570;GO:0001570;GO:0001570;GO:0001573;GO:0005102;GO:0005102;GO:0005178;GO:0005886;GO:0005925;GO:0006955;GO:0007155;GO:0007155;GO:0007160;GO:0007179;GO:0007229;GO:0007229;GO:0007229;GO:0008305;GO:0009615;GO:0009986;GO:0009986;GO:0010628;GO:0010628;GO:0010629;GO:0010629;GO:0016020;GO:0016021;GO:0016477;GO:0033627;GO:0034686;GO:0034686;GO:0034686;GO:0038023;GO:0045766;GO:0045766;GO:0051216;GO:…	K06591	-	W	12Q2P;1AT9U;0V5Y5;18U7U;KOG1226;0DG7P;09UY7;0UT4H;1CQX7	integrin beta 8 [Source:MGI Symbol;Acc:MGI:1338035]	320910	Q0VBD0
ENSMUSG00000031792	1299.02	516.887	2081.15	4.02631	2.00946	2.64279e-43	7.31155e-42	8	96058912	96074135	+	2803	Usb1	GO:0000175;GO:0000175;GO:0004518;GO:0004518;GO:0005634;GO:0005634;GO:0005654;GO:0008380;GO:0016787;GO:0034477;GO:0034477;GO:0034477;GO:0045171;GO:0090305;GO:0090503;GO:1990838;GO:0004518;GO:0005634;GO:0016787;GO:0034477;GO:0090305;	K23093	EC:3.1.4.-	A	13NN2;KOG3102;1CU9Y;1B2RS;0UM5C;18VP2;0DJHH;0A2EH;0VDA4	U6 snRNA biogenesis 1 [Source:MGI Symbol;Acc:MGI:2142454]	101985	Q91W78;A0A0R4J0E0
ENSMUSG00000004530	4498.16	6859.03	2137.29	0.311602	-1.68222	4.25926e-43	1.17619e-41	5	113980497	114046819	-	9664	Coro1c	GO:0015629;GO:0030036;GO:0051015;GO:0000147;GO:0001755;GO:0001755;GO:0001755;GO:0001932;GO:0001932;GO:0001933;GO:0001933;GO:0003779;GO:0005737;GO:0005768;GO:0005856;GO:0005856;GO:0005886;GO:0005938;GO:0006909;GO:0007015;GO:0010008;GO:0010008;GO:0010008;GO:0010632;GO:0010632;GO:0010633;GO:0010633;GO:0010762;GO:0015629;GO:0015629;GO:0015629;GO:0016020;GO:0016197;GO:0016197;GO:0016197;GO:0016328;GO:…	K13886	-	Z	12NEF;18UCI;0V4FS;09TGS;1CQGI;KOG0303;1B0YQ;0UKMS;0DFT4	coronin, actin binding protein 1C [Source:MGI Symbol;Acc:MGI:1345964]	23790	Q9WUM4
ENSMUSG00000017830	1140.87	191.168	2090.57	10.9358	3.45098	4.30345e-43	1.18619e-41	11	100585710	100595097	-	3272	Dhx58	GO:0000166;GO:0002376;GO:0003677;GO:0003723;GO:0003724;GO:0003725;GO:0003725;GO:0003725;GO:0003725;GO:0003727;GO:0003727;GO:0003727;GO:0003727;GO:0004386;GO:0005524;GO:0005524;GO:0005737;GO:0005737;GO:0005737;GO:0008270;GO:0008270;GO:0008270;GO:0008270;GO:0009615;GO:0009615;GO:0009617;GO:0016787;GO:0016787;GO:0032480;GO:0032480;GO:0032480;GO:0032481;GO:0032728;GO:0039534;GO:0039534;GO:0039534;GO:…	K12649	EC:3.6.4.13	A	0V4TZ;18WX5;KOG0354;1CTWW;0DF53;1AT0C;12NQ7;09TUS;0UGAY	DEXH (Asp-Glu-X-His) box polypeptide 58 [Source:MGI Symbol;Acc:MGI:1931560]	80861	Q99J87
ENSMUSG00000035671	938.892	350.154	1527.63	4.36275	2.12524	7.72443e-43	2.12522e-41	8	84937307	84963684	-	4625	Zswim4	GO:0003674;GO:0008270;GO:0031462;GO:0046872;GO:1902667;	-	-	S	1B4U0;0V6Y9;12NM3;0US5R;0DM5V;09VZT;1D0ZM;KOG3615;195YM	zinc finger SWIM-type containing 4 [Source:MGI Symbol;Acc:MGI:2443726]	212168	Q8C7B8
ENSMUSG00000037306	2651.53	4101.81	1201.24	0.292857	-1.77173	7.74119e-43	2.12591e-41	4	134289001	134431601	-	5722	Man1c1	GO:0000139;GO:0004571;GO:0004571;GO:0004571;GO:0005509;GO:0005509;GO:0005783;GO:0005794;GO:0005975;GO:0006013;GO:0006491;GO:0008152;GO:0016020;GO:0016020;GO:0016021;GO:0016787;GO:0016798;GO:0030166;GO:0000139;GO:0004571;GO:0004571;GO:0004571;GO:0005509;GO:0005509;GO:0005783;GO:0005794;GO:0005975;GO:0006013;GO:0006491;GO:0008152;GO:0016020;GO:0016020;GO:0016021;GO:0016787;GO:0016798;GO:0030166;	K01230	EC:3.2.1.113	G	0V66Z;12P5U;KOG2431;0USEQ;195V7;09V7E;0DGG8;1B3WH;1CR5U	mannosidase, alpha, class 1C, member 1 [Source:MGI Symbol;Acc:MGI:2446214]	230815	Q6NXK9
ENSMUSG00000062203	2881.58	1321.82	4441.34	3.36002	1.74847	9.8496e-43	2.69995e-41	16	11037156	11072189	-	5428	Gspt1	GO:0000166;GO:0000184;GO:0002184;GO:0003747;GO:0003747;GO:0003747;GO:0003924;GO:0003924;GO:0005525;GO:0005525;GO:0005829;GO:0006412;GO:0006412;GO:0006449;GO:0006449;GO:0006479;GO:0018444;GO:0000166;GO:0000184;GO:0002184;GO:0003747;GO:0003747;GO:0003747;GO:0003747;GO:0003924;GO:0003924;GO:0005525;GO:0005525;GO:0005829;GO:0006412;GO:0006412;GO:0006449;GO:0006449;GO:0006449;GO:0006479;GO:0006479;GO:…	K03267	-	J	1ASVT;0V584;09U8Z;0DFS7;1CQFS;0UH7I;12P6V;KOG0459	G1 to S phase transition 1 [Source:MGI Symbol;Acc:MGI:1316728]	14852	Q8R050
ENSMUSG00000027782	3777.61	1781.58	5773.65	3.24075	1.69633	1.10457e-42	3.02228e-41	3	68974482	69034446	-	8940	Kpna4	GO:0005654;GO:0006606;GO:0015031;GO:0031965;GO:0061608;GO:0005515;GO:0005515;GO:0005634;GO:0005634;GO:0005634;GO:0005654;GO:0005654;GO:0005737;GO:0005737;GO:0006606;GO:0006606;GO:0006607;GO:0008139;GO:0015031;GO:0031965;GO:0042542;GO:0061608;GO:0061608;GO:0061608;GO:0006606;GO:0015031;GO:0061608;	K23583	-	U	0V809;18UYN;1AWAT;09X23;0UJT2;1CT39;KOG0166;0DICS;12RBS	karyopherin (importin) alpha 4 [Source:MGI Symbol;Acc:MGI:1100848]	16649	O35343;Q4FJX1
ENSMUSG00000026786	3469.91	1623.56	5316.26	3.27444	1.71125	1.4607e-42	3.98937e-41	2	22664106	22765665	+	7414	Apbb1ip	GO:0002291;GO:0005515;GO:0005515;GO:0005737;GO:0005829;GO:0005829;GO:0005829;GO:0005856;GO:0005886;GO:0005886;GO:0005886;GO:0005886;GO:0005925;GO:0007165;GO:0016020;GO:0030027;GO:0030054;GO:0042101;GO:0042995;GO:0045785;	K17704	-	Z;T	09UFY;0V5FB;0DFRP;1B3EM;1CQF9;KOG3751;12P97;18VS6;0UH70	amyloid beta (A4) precursor protein-binding, family B, member 1 interacting protein [Source:MGI Symbol;Acc:MGI:1861354]	54519	Q8R5A3;B1AYC9
ENSMUSG00000021196	3459.79	1618.98	5300.59	3.27403	1.71107	1.47582e-42	4.02329e-41	13	6629804	6698813	-	13401	Pfkp	GO:0000166;GO:0003824;GO:0003872;GO:0003872;GO:0003872;GO:0003872;GO:0005524;GO:0005524;GO:0005524;GO:0005524;GO:0005737;GO:0005737;GO:0005737;GO:0005737;GO:0005829;GO:0005945;GO:0005945;GO:0006002;GO:0006002;GO:0006002;GO:0006096;GO:0006096;GO:0006096;GO:0008152;GO:0016020;GO:0016208;GO:0016301;GO:0016310;GO:0016740;GO:0030388;GO:0030388;GO:0042802;GO:0042802;GO:0044877;GO:0044877;GO:0046872;GO:…	K00850	EC:2.7.1.11	G	09U07;0DFA0;KOG2440;1ASPB;0V4Z1;0UH05;12PSE;18WW7;1CPZP	phosphofructokinase, platelet [Source:MGI Symbol;Acc:MGI:1891833]	56421	Q9WUA3;Q8C605
ENSMUSG00000028403	1299.84	530.551	2069.13	3.89997	1.96346	1.75565e-42	4.77743e-41	4	82716975	82778195	-	12972	Zdhhc21	GO:0000139;GO:0001942;GO:0003056;GO:0005783;GO:0005794;GO:0005794;GO:0005794;GO:0005794;GO:0005886;GO:0005886;GO:0005886;GO:0006612;GO:0016020;GO:0016021;GO:0016409;GO:0016409;GO:0016409;GO:0016740;GO:0016746;GO:0018215;GO:0018230;GO:0018230;GO:0018230;GO:0018230;GO:0018345;GO:0018345;GO:0019706;GO:0019706;GO:0048733;GO:0071875;GO:1903140;GO:1904997;GO:0016020;GO:0016021;GO:0016409;GO:0016740;GO:…	K18932	EC:2.3.1.225	S;M	0DKB7;1B2GF;1CV51;0USDA;13IDK;09YVZ;18UR8;0V9TU;KOG1311	zinc finger, DHHC domain containing 21 [Source:MGI Symbol;Acc:MGI:1915518]	68268	Q9D270
ENSMUSG00000004043	1115.43	439.449	1791.41	4.07649	2.02733	1.76605e-42	4.79697e-41	11	100750177	100775995	+	7133	Stat5a	GO:0000785;GO:0000978;GO:0000978;GO:0000981;GO:0001228;GO:0001553;GO:0001779;GO:0001938;GO:0003677;GO:0003677;GO:0003677;GO:0003690;GO:0003700;GO:0003700;GO:0005515;GO:0005515;GO:0005515;GO:0005634;GO:0005634;GO:0005634;GO:0005654;GO:0005654;GO:0005737;GO:0005737;GO:0005829;GO:0005829;GO:0006355;GO:0006357;GO:0006357;GO:0006366;GO:0006952;GO:0007165;GO:0007259;GO:0007259;GO:0007565;GO:0007595;GO:…	K11223	-	K	1B289;12PE2;KOG3667;194UJ;0UP21;09VPA;0V6N6;0DGXQ;1CRMY	signal transducer and activator of transcription 5A [Source:MGI Symbol;Acc:MGI:103036]	20850	P42230;Q9JIA0;Q3UZ79
ENSMUSG00000034459	6994.22	42.6859	13945.7	326.706	8.35185	1.88183e-42	5.10216e-41	19	34618271	34627409	+	2656	Ifit1	GO:0002376;GO:0003723;GO:0003723;GO:0005515;GO:0005737;GO:0005829;GO:0009615;GO:0009617;GO:0035457;GO:0035458;GO:0045087;GO:0051607;GO:0051607;	K14217	-	S;P	0DNWM;0A0WM;1CXU0;13I8N;1B0KV;0V5W7;KOG1124;1949C;0UM6F	interferon-induced protein with tetratricopeptide repeats 1 [Source:MGI Symbol;Acc:MGI:99450]	15957	Q64282
ENSMUSG00000050737	5410.91	41.2911	10780.5	261.086	8.02838	2.12227e-42	5.7436e-41	2	30779483	30819875	-	3931	Ptges	GO:0001516;GO:0001516;GO:0001516;GO:0001516;GO:0001516;GO:0002526;GO:0002544;GO:0004364;GO:0004364;GO:0004364;GO:0004602;GO:0004602;GO:0004602;GO:0004667;GO:0004667;GO:0004667;GO:0005641;GO:0005737;GO:0005737;GO:0006629;GO:0006631;GO:0006633;GO:0006693;GO:0006693;GO:0008285;GO:0014070;GO:0016020;GO:0016021;GO:0016021;GO:0016021;GO:0016021;GO:0016491;GO:0016740;GO:0016853;GO:0019233;GO:0031620;GO:…	K15729	EC:5.3.99.3	I	0DR0J;1D3D6;0IY81;13RWR;0A6VT;0VHPZ;1B5E2;1934B;0UPHP	prostaglandin E synthase [Source:MGI Symbol;Acc:MGI:1927593]	64292	Q9JM51;Q8BNP8
ENSMUSG00000036611	373.379	663.214	83.5443	0.125969	-2.98886	2.37332e-42	6.4114e-41	9	25392843	25515406	+	2935	Eepd1	GO:0003677;GO:0006281;GO:0010875;GO:0010875;GO:0046658;	-	-	L	1DD6Y;0V1JS;0E67P;14U2D;1BAB5;196X9;0B0UW;0WDCG;0KDV5	endonuclease/exonuclease/phosphatase family domain containing 1 [Source:MGI Symbol;Acc:MGI:1914734]	67484	Q3TGW2
ENSMUSG00000029822	3357.09	617.688	6096.5	9.86988	3.30303	2.92001e-42	7.87399e-41	6	50270310	50433181	-	9021	Osbpl3	GO:0005634;GO:0005737;GO:0005783;GO:0005789;GO:0005829;GO:0005829;GO:0005829;GO:0005886;GO:0005886;GO:0005886;GO:0006869;GO:0008289;GO:0008289;GO:0015248;GO:0015485;GO:0015485;GO:0015918;GO:0016020;GO:0016020;GO:0031965;GO:0031965;GO:0032433;GO:0032934;GO:0042995;GO:0043231;GO:0097038;GO:0097038;GO:0005829;GO:0005886;GO:0006869;GO:0008289;GO:0008289;GO:0015485;GO:0031965;GO:0097038;GO:0006869;GO:…	K20463	-	T;I	0V51S;0DJ92;0UR3B;12Q34;18VJT;KOG1737;1CU13;09XWE;1B0YT	oxysterol binding protein-like 3 [Source:MGI Symbol;Acc:MGI:1918970]	71720	Q9DBS9
ENSMUSG00000052684	2136.68	3325.38	947.988	0.285077	-1.81058	3.26125e-42	8.7783e-41	4	94937271	94940459	-	3189	Jun	GO:0000122;GO:0000785;GO:0000785;GO:0000791;GO:0000976;GO:0000976;GO:0000978;GO:0000978;GO:0000981;GO:0000981;GO:0001102;GO:0001227;GO:0001228;GO:0001228;GO:0001525;GO:0001525;GO:0001774;GO:0001836;GO:0001836;GO:0001889;GO:0001938;GO:0003151;GO:0003677;GO:0003677;GO:0003677;GO:0003682;GO:0003690;GO:0003690;GO:0003700;GO:0003700;GO:0003700;GO:0005096;GO:0005515;GO:0005515;GO:0005515;GO:0005634;GO:…	K04448	-	-	-	jun proto-oncogene [Source:MGI Symbol;Acc:MGI:96646]	16476	P05627;Q52L79
ENSMUSG00000053819	2992.68	1389.05	4596.3	3.30895	1.72637	3.68676e-42	9.90575e-41	3	126389951	126639975	+	22493	Camk2d	GO:0000082;GO:0000166;GO:0001666;GO:0002028;GO:0003254;GO:0004672;GO:0004672;GO:0004674;GO:0004674;GO:0004683;GO:0004683;GO:0004683;GO:0004683;GO:0004683;GO:0005515;GO:0005515;GO:0005516;GO:0005516;GO:0005516;GO:0005516;GO:0005524;GO:0005524;GO:0005634;GO:0005737;GO:0005737;GO:0005829;GO:0005886;GO:0005954;GO:0006468;GO:0006468;GO:0006468;GO:0006816;GO:0010613;GO:0010613;GO:0010649;GO:0010666;GO:…	K04515	EC:2.7.11.17	T	1AZN8;0UFT0;194Y9;KOG0033;0DI02;09W2C;1CSQS;0V70H;12PNB	calcium/calmodulin-dependent protein kinase II, delta [Source:MGI Symbol;Acc:MGI:1341265]	108058	Q6PHZ2
ENSMUSG00000031799	12278.9	2571.81	21985.9	8.54882	3.09572	3.71101e-42	9.95299e-41	8	72884018	72906986	+	4269	Tpm4	GO:0001725;GO:0002102;GO:0003779;GO:0005737;GO:0005737;GO:0005856;GO:0005884;GO:0006936;GO:0007015;GO:0015629;GO:0015629;GO:0015629;GO:0030863;GO:0042802;GO:0042802;GO:0042802;GO:0042803;GO:0042803;GO:0042803;GO:0046872;GO:0046982;GO:0046982;GO:0046982;GO:0051015;GO:0051015;GO:0051015;GO:0051015;GO:0003779;GO:0005856;	K10375	-	Z	0V7TQ;KOG1003;0UMIG;1B2EJ;0DJ35;09XR3;194SA;1CTUZ;12RF9	tropomyosin 4 [Source:MGI Symbol;Acc:MGI:2449202]	326618	Q6IRU2
ENSMUSG00000015889	642.276	1079.66	204.893	0.189776	-2.39763	5.39826e-42	1.44522e-40	10	93289273	93320737	+	6102	Lta4h	GO:0004177;GO:0004177;GO:0004177;GO:0004177;GO:0004301;GO:0004301;GO:0004301;GO:0004301;GO:0004463;GO:0004463;GO:0004463;GO:0004463;GO:0005515;GO:0005634;GO:0005634;GO:0005654;GO:0005654;GO:0005737;GO:0005737;GO:0005829;GO:0005829;GO:0005829;GO:0006508;GO:0006508;GO:0006691;GO:0008233;GO:0008237;GO:0008237;GO:0008270;GO:0008270;GO:0008270;GO:0008270;GO:0016787;GO:0019370;GO:0019370;GO:0019370;GO:…	K01254	EC:3.3.2.6	O;I;E;V	0V4I1;KOG1047;1CPJD;0UFXR;1ARRZ;12P0U;09TJ3;18XX8;0DEVT	leukotriene A4 hydrolase [Source:MGI Symbol;Acc:MGI:96836]	16993	P24527
ENSMUSG00000022148	5888.63	2873.61	8903.65	3.09842	1.63153	6.64346e-42	1.7754e-40	15	6552334	6692794	+	5384	Fyb	GO:0005886;GO:0006955;GO:0007229;GO:0015629;GO:0005886;GO:0006955;GO:0007229;GO:0015629;GO:0005515;GO:0005515;GO:0005515;GO:0005634;GO:0005737;GO:0005829;GO:0005886;GO:0005886;GO:0005886;GO:0006955;GO:0007229;GO:0007229;GO:0008289;GO:0015629;GO:0030054;GO:0032991;GO:0044877;GO:0044877;GO:0050852;GO:0072659;GO:0072659;GO:0005886;GO:0007229;GO:0008289;	K17698	-	T	0DM42;0IEQF;1B4PQ;1CVZ5;0V8YK;13K6Q;0UQ7C;09YW6;18VT5	FYN binding protein [Source:MGI Symbol;Acc:MGI:1346327]	23880	O35601;B2RUR0
ENSMUSG00000022122	358.617	23.1626	694.071	29.9651	4.90521	7.27875e-42	1.9417e-40	14	104052061	104081838	-	4266	Ednrb	GO:0000122;GO:0000122;GO:0000122;GO:0001755;GO:0001934;GO:0001934;GO:0004930;GO:0004930;GO:0004962;GO:0004962;GO:0004962;GO:0004962;GO:0005515;GO:0005886;GO:0005886;GO:0005886;GO:0005886;GO:0006885;GO:0007165;GO:0007186;GO:0007186;GO:0007186;GO:0007200;GO:0007200;GO:0007204;GO:0007204;GO:0007422;GO:0007497;GO:0007568;GO:0008217;GO:0008217;GO:0008217;GO:0008284;GO:0008284;GO:0014043;GO:0014070;GO:…	K04198	-	T	KOG3656;1CT9Q;0URCD;0A0GH;0DN3M;13I7S;18TF7;1AZ5R;0VBCQ	endothelin receptor type B [Source:MGI Symbol;Acc:MGI:102720]	13618	P48302
ENSMUSG00000032754	1946.58	3221.81	671.345	0.208375	-2.26275	7.5641e-42	2.01421e-40	5	120649233	120672089	+	3463	Slc8b1	GO:0005432;GO:0005432;GO:0005432;GO:0005739;GO:0005739;GO:0005739;GO:0005739;GO:0005743;GO:0005743;GO:0005743;GO:0005886;GO:0005886;GO:0006811;GO:0006812;GO:0006814;GO:0006816;GO:0006851;GO:0006851;GO:0006874;GO:0008324;GO:0015297;GO:0016020;GO:0016020;GO:0016021;GO:0016021;GO:0030061;GO:0030061;GO:0030061;GO:0032592;GO:0032592;GO:0035725;GO:0042383;GO:0042383;GO:0042593;GO:0042593;GO:0042802;GO:…	K13754	-	P	0VCS5;0DPIS;18WTG;0UN4C;13JXP;1ATUF;0A0GN;1CYHD;KOG2399	solute carrier family 8 (sodium/lithium/calcium exchanger), member B1 [Source:MGI Symbol;Acc:MGI:2180781]	170756	Q925Q3
ENSMUSG00000024431	3170.5	1486.1	4854.91	3.26687	1.70791	8.38847e-42	2.22975e-40	18	39543598	39652474	-	7684	Nr3c1	GO:0003677;GO:0003677;GO:0003700;GO:0004883;GO:0005496;GO:0005496;GO:0005634;GO:0005634;GO:0005737;GO:0005739;GO:0005819;GO:0005856;GO:0006325;GO:0006355;GO:0008270;GO:0042921;GO:0043402;GO:0043565;GO:0046872;GO:0003677;GO:0003677;GO:0003700;GO:0004883;GO:0005496;GO:0005496;GO:0005634;GO:0005634;GO:0005737;GO:0005739;GO:0005819;GO:0005856;GO:0006325;GO:0006355;GO:0008270;GO:0042921;GO:0043402;GO:…	K05771	-	K;B	09TMN;0DEY5;1AXW4;18YUK;13J22;0UG10;1CPMU;KOG3575;0V4KR	nuclear receptor subfamily 3, group C, member 1 [Source:MGI Symbol;Acc:MGI:95824]	14815	-
ENSMUSG00000020423	791.582	284.165	1299	4.57129	2.1926	8.69246e-42	2.30644e-40	1	134002908	134006858	-	2743	Btg2	GO:0000122;GO:0000122;GO:0003714;GO:0003714;GO:0005515;GO:0005634;GO:0005737;GO:0006479;GO:0006974;GO:0006974;GO:0008285;GO:0008285;GO:0008285;GO:0008285;GO:0008285;GO:0008306;GO:0009612;GO:0009952;GO:0010033;GO:0010243;GO:0014070;GO:0017148;GO:0017148;GO:0017148;GO:0021542;GO:0021954;GO:0030182;GO:0030182;GO:0031175;GO:0031175;GO:0035914;GO:0043066;GO:0043066;GO:0043434;GO:0043524;GO:0043524;GO:…	K14443	-	T;K	13QG9;0A02X;1AVZA;0VAZ6;18UR3;KOG4006;1CWI2;0DMNM;0UQVQ	BTG anti-proliferation factor 2 [Source:MGI Symbol;Acc:MGI:108384]	12227	Q04211;Q3TF68
ENSMUSG00000024277	3353.03	1581.79	5124.27	3.23954	1.69579	1.06997e-41	2.83399e-40	18	23885390	24026918	+	10202	Mapre2	GO:0005737;GO:0005856;GO:0005874;GO:0007049;GO:0008017;GO:0051301;GO:0005737;GO:0005856;GO:0005874;GO:0007049;GO:0008017;GO:0051301;GO:0008017;GO:0005515;GO:0005737;GO:0005815;GO:0005856;GO:0005874;GO:0005881;GO:0005925;GO:0007049;GO:0008017;GO:0019901;GO:0031110;GO:0032014;GO:0043547;GO:0051010;GO:0051010;GO:0051225;GO:0051233;GO:0051301;GO:0051549;GO:0120183;GO:1904825;GO:0005515;GO:0005737;GO:…	K10436	-	Z	12QG6;1CTF1;18WEQ;0UFS1;KOG3000;1AZ5U;0DIPZ;09XCH;0V74H	microtubule-associated protein, RP/EB family, member 2 [Source:MGI Symbol;Acc:MGI:106271]	212307	Q8R001
ENSMUSG00000023066	229.031	428.473	29.5903	0.0690599	-3.85601	1.21749e-41	3.21901e-40	18	88989914	89149140	+	12075	Rttn	GO:0003674;GO:0005737;GO:0005813;GO:0005814;GO:0005856;GO:0005929;GO:0007099;GO:0007275;GO:0007368;GO:0010457;GO:0016021;GO:0032053;GO:0036064;GO:0036064;GO:0036064;GO:0036064;GO:0036064;GO:0042995;GO:0044782;	K16484	-	Z;S	0DJUU;12WT9;1B4TP;0UJG7;0IEI0;0V9U6;09YWF;1CUN1;19575	rotatin [Source:MGI Symbol;Acc:MGI:2179288]	246102	Q8R4Y8
ENSMUSG00000078616	484.119	17.5288	950.71	54.2371	5.76121	1.26375e-41	3.33541e-40	7	104031272	104050044	-	1716	Trim30c	GO:0000209;GO:0005634;GO:0005654;GO:0005737;GO:0005737;GO:0005829;GO:0008270;GO:0010468;GO:0010508;GO:0016567;GO:0019901;GO:0032880;GO:0042803;GO:0043123;GO:0045087;GO:0046596;GO:0046872;GO:0051092;GO:0061630;	-	-	O;K	0B6AK;0WJ0G;13FYK;1DGAS;1BBGY;197FW;0E9FG;0ITFH;0V3TY	tripartite motif-containing 30C [Source:MGI Symbol;Acc:MGI:4821257]	434219	-
ENSMUSG00000030144	18060.8	9155.5	26966.2	2.94535	1.55844	1.39122e-41	3.66534e-40	6	123239070	123252224	+	1599	Clec4d	GO:0016020;GO:0016021;GO:0002250;GO:0002250;GO:0002292;GO:0002376;GO:0005886;GO:0016020;GO:0016021;GO:0030246;GO:0030887;GO:0034987;GO:0038094;GO:0042742;GO:0045087;GO:0045087;GO:0046872;	K10058	-	T;V	0UJ1X;1CW80;13PCP;1B09X;KOG4297;0VAQR;0DMCT;1930B;09ZUB	C-type lectin domain family 4, member d [Source:MGI Symbol;Acc:MGI:1298389]	17474	Q9Z2H6;Q4KL29
ENSMUSG00000028691	37196.1	19107.2	55285.1	2.89343	1.53278	2.20672e-41	5.80363e-40	4	116542741	116558019	+	3043	Prdx1	GO:0000302;GO:0000791;GO:0004601;GO:0004601;GO:0005515;GO:0005634;GO:0005730;GO:0005737;GO:0005737;GO:0005739;GO:0005759;GO:0005782;GO:0005829;GO:0005829;GO:0005829;GO:0006979;GO:0008283;GO:0008379;GO:0016209;GO:0016209;GO:0016491;GO:0016491;GO:0019430;GO:0019430;GO:0020037;GO:0030101;GO:0032872;GO:0034101;GO:0042267;GO:0042744;GO:0042802;GO:0042802;GO:0043209;GO:0045321;GO:0045454;GO:0051920;GO:…	K13279	EC:1.11.1.24	O	12TFB;0V5GS;KOG0852;194CX;0UH8R;09UHH;1ASHU;1CQGQ;0DFT9	peroxiredoxin 1 [Source:MGI Symbol;Acc:MGI:99523]	18477	P35700
ENSMUSG00000039987	734.622	260.135	1209.11	4.64801	2.21661	2.54572e-41	6.6834e-40	5	20963661	21087122	-	6929	Phtf2	GO:0003677;GO:0005634;GO:0005783;GO:0016020;GO:0016021;GO:0003677;GO:0005634;	-	-	K	0V58Q;1AYP7;0DENH;0IF1F;18V1I;12SVX;0UJQX;09ZVF;1CW97	putative homeodomain transcription factor 2 [Source:MGI Symbol;Acc:MGI:1916020]	68770	Q8CB19;Q8C9D2;A0A0R4J1Q1
ENSMUSG00000029640	2663.92	1236.96	4090.89	3.30722	1.72562	3.06452e-41	8.0313e-40	5	146671619	146731816	-	4639	Usp12	GO:0004197;GO:0004197;GO:0004197;GO:0004197;GO:0004843;GO:0004843;GO:0004843;GO:0004843;GO:0004843;GO:0005634;GO:0005634;GO:0005829;GO:0005829;GO:0006508;GO:0006511;GO:0008233;GO:0008234;GO:0016579;GO:0016579;GO:0016579;GO:0016579;GO:0016579;GO:0016787;GO:0018215;GO:0046872;GO:0050862;GO:0101005;	K11842	EC:3.4.19.12	O	12R4Z;KOG1864;0DFZU;0UMGZ;09UPY;1CTKJ;0V5PJ;1AWZJ;18T3E	ubiquitin specific peptidase 12 [Source:MGI Symbol;Acc:MGI:1270128]	22217	Q9D9M2
ENSMUSG00000063268	1433.35	432.438	2434.26	5.62915	2.49292	3.31599e-41	8.67508e-40	15	76115374	76127641	-	4275	Parp10	GO:0003950;GO:0003950;GO:0016740;GO:0016757;GO:0003714;GO:0003950;GO:0003950;GO:0003950;GO:0005634;GO:0005634;GO:0005634;GO:0005730;GO:0005730;GO:0005737;GO:0005737;GO:0005737;GO:0005794;GO:0005794;GO:0005829;GO:0005829;GO:0006281;GO:0006471;GO:0006974;GO:0010629;GO:0010629;GO:0010847;GO:0016740;GO:0016757;GO:0019985;GO:0019985;GO:0032088;GO:0045071;GO:0045892;GO:0048147;GO:0070212;GO:0070212;GO:…	K15261	EC:2.4.2.30	S	09V45;1CR2R;0URB6;1AXS0;18THP;0IH3S;0DGDA;0V63S;12T9U	poly (ADP-ribose) polymerase family, member 10 [Source:MGI Symbol;Acc:MGI:3712326]	671535	Q8CIE4
ENSMUSG00000031101	782.465	1288.45	276.482	0.214585	-2.22038	4.82097e-41	1.25902e-39	X	47235313	47250442	+	2677	Sash3	GO:0002639;GO:0002639;GO:0002726;GO:0002821;GO:0002821;GO:0005634;GO:0005634;GO:0005737;GO:0005737;GO:0030890;GO:0030890;GO:0032729;GO:0032733;GO:0032743;GO:0032753;GO:0032760;GO:0042102;GO:0043372;GO:0046622;GO:0048873;GO:0051251;	K23706	-	T	1971R;1DENT;0V2RS;1BAQF;0INAS;0B3FB;13BFS;0WFUF;0E7NM	SAM and SH3 domain containing 3 [Source:MGI Symbol;Acc:MGI:1921381]	74131	Q8K352
ENSMUSG00000018796	8713.17	919.339	16507	17.9553	4.16634	5.50097e-41	1.4341e-39	8	46924074	46989088	+	10483	Acsl1	GO:0000038;GO:0000038;GO:0000038;GO:0000038;GO:0000166;GO:0001676;GO:0001676;GO:0001676;GO:0001676;GO:0004467;GO:0004467;GO:0004467;GO:0004467;GO:0004467;GO:0005524;GO:0005739;GO:0005739;GO:0005739;GO:0005739;GO:0005741;GO:0005741;GO:0005741;GO:0005777;GO:0005778;GO:0005778;GO:0005778;GO:0005783;GO:0005783;GO:0005783;GO:0005783;GO:0005783;GO:0005789;GO:0005886;GO:0005886;GO:0006629;GO:0006631;GO:…	K01897	EC:6.2.1.3	I	0V4XT;KOG1256;1CY7I;0DJJS;1B2FS;12PYZ;0UNII;18WRG;09TYX	acyl-CoA synthetase long-chain family member 1 [Source:MGI Symbol;Acc:MGI:102797]	14081	P41216
ENSMUSG00000043004	1725.15	2697.24	753.071	0.279201	-1.84063	6.51699e-41	1.69601e-39	14	19922627	20027695	-	4390	Gng2	GO:0003924;GO:0005834;GO:0005834;GO:0005834;GO:0005886;GO:0005886;GO:0007165;GO:0007186;GO:0007186;GO:0007186;GO:0008283;GO:0016020;GO:0031680;GO:0031681;GO:0031681;GO:0031681;GO:0031681;GO:0003924;GO:0005834;GO:0005834;GO:0005834;GO:0005886;GO:0005886;GO:0007165;GO:0007186;GO:0007186;GO:0007186;GO:0008283;GO:0016020;GO:0031680;GO:0031681;GO:0031681;GO:0031681;GO:0031681;GO:0003924;GO:0005834;GO:…	K07826	-	T	13U6Z;1B6K4;KOG4119;0DVH5;0UW8F;0A99M;193RN;1D4TS;0VK66	guanine nucleotide binding protein (G protein), gamma 2 [Source:MGI Symbol;Acc:MGI:102705]	14702	P63213
ENSMUSG00000041417	3447.89	1646.12	5249.66	3.18911	1.67315	7.67345e-41	1.99349e-39	13	101817071	101904725	-	10079	Pik3r1	GO:0001678;GO:0001784;GO:0001784;GO:0001934;GO:0001953;GO:0005102;GO:0005158;GO:0005158;GO:0005158;GO:0005159;GO:0005159;GO:0005159;GO:0005161;GO:0005168;GO:0005168;GO:0005515;GO:0005515;GO:0005515;GO:0005516;GO:0005634;GO:0005634;GO:0005737;GO:0005737;GO:0005737;GO:0005801;GO:0005829;GO:0005829;GO:0005886;GO:0005911;GO:0005942;GO:0005942;GO:0005943;GO:0006006;GO:0006468;GO:0006606;GO:0007162;GO:…	K02649	-	T	18VDX;09UBX;KOG4637;12NNR;0DIHX;1CT8C;1AUCA;0UMVA;0V5B2	phosphoinositide-3-kinase regulatory subunit 1 [Source:MGI Symbol;Acc:MGI:97583]	18708	P26450;Q8C7P2;Q3TP23
ENSMUSG00000041324	306.896	66.5203	547.272	8.22714	3.04039	9.24949e-41	2.39876e-39	13	16186436	16206206	+	6390	Inhba	GO:0000082;GO:0000082;GO:0000082;GO:0001541;GO:0001541;GO:0001541;GO:0001707;GO:0001942;GO:0001942;GO:0001942;GO:0002244;GO:0002244;GO:0005102;GO:0005125;GO:0005125;GO:0005125;GO:0005125;GO:0005179;GO:0005179;GO:0005576;GO:0005576;GO:0005576;GO:0005576;GO:0005576;GO:0005615;GO:0005615;GO:0005615;GO:0005615;GO:0006357;GO:0006357;GO:0006357;GO:0007050;GO:0007050;GO:0007050;GO:0008083;GO:0008083;GO:…	K04667	-	T	0V7ND;13QY5;KOG3900;09WPX;195NP;0DHZK;0UI57;1CSQ8;1B33Q	inhibin beta-A [Source:MGI Symbol;Acc:MGI:96570]	16323	Q04998;Q3UY39
ENSMUSG00000038178	8954.64	13381.6	4527.63	0.338346	-1.56343	1.04047e-40	2.69366e-39	11	75422520	75468401	+	10042	Slc43a2	GO:0015179;GO:0015807;GO:0016020;GO:0016021;GO:0055085;GO:1902475;GO:0005886;GO:0015175;GO:0015179;GO:0015179;GO:0015179;GO:0015804;GO:0015807;GO:0015807;GO:0016020;GO:0016021;GO:0022857;GO:0051956;GO:0055085;GO:0060358;GO:1902475;GO:0005886;GO:0015175;GO:0015179;GO:0015179;GO:0015179;GO:0015804;GO:0015807;GO:0015807;GO:0016020;GO:0016021;GO:0022857;GO:0051956;GO:0055085;GO:0060358;GO:1902475;GO:…	K08229	-	P	1CTQC;0IHJQ;0V6IG;194FX;09VJC;13CV8;0DGTZ;0URU3;1AW1A	solute carrier family 43, member 2 [Source:MGI Symbol;Acc:MGI:2442746]	215113	Q8CGA3
ENSMUSG00000022408	276.578	524.108	29.048	0.0554237	-4.17335	1.36759e-40	3.53439e-39	15	80556048	80584626	+	2993	Fam83f	-	K23930	-	S	1CT5C;09X3S;0IJIT;0DIET;13MAU;18TXF;0US88;0V82A;1AXYD	family with sequence similarity 83, member F [Source:MGI Symbol;Acc:MGI:2146227]	213956	Q3UKU4;A0A0R4J033
ENSMUSG00000038886	2270.24	3502.49	1038	0.29636	-1.75458	1.4284e-40	3.68516e-39	7	79998845	80021123	-	10317	Man2a2	GO:0000139;GO:0000139;GO:0003824;GO:0004559;GO:0004559;GO:0004572;GO:0005794;GO:0005975;GO:0006013;GO:0006486;GO:0006491;GO:0006517;GO:0008152;GO:0015923;GO:0016020;GO:0016021;GO:0016787;GO:0016798;GO:0016799;GO:0030246;GO:0046872;GO:0003824;GO:0004559;GO:0005975;GO:0006013;GO:0008152;GO:0016020;GO:0016021;GO:0016787;GO:0016798;GO:0016020;GO:0016021;	K01231	EC:3.2.1.114	G	0DM6C;1B4DI;0V9UI;18VI8;0UQAF;09VYT;KOG1958;12QNA;1CW1I	mannosidase 2, alpha 2 [Source:MGI Symbol;Acc:MGI:2150656]	140481	Q8BRK9;Q197W7;Q7TPQ0
ENSMUSG00000044629	293.165	547.301	39.0283	0.0713105	-3.80974	1.43144e-40	3.68663e-39	11	17001586	17029371	+	4003	Cnrip1	GO:0005737;GO:0005886;GO:0008022;GO:0031718;GO:0005737;GO:0005886;GO:0005886;GO:0008022;GO:0010469;GO:0031718;GO:0031718;GO:0043209;GO:2000272;GO:2000272;	-	-	T	0UNYQ;1937H;0IK8D;0DM9M;0A1D0;0VEUT;13NZS;1B05S;1CW4S	cannabinoid receptor interacting protein 1 [Source:MGI Symbol;Acc:MGI:1917505]	380686	Q5M8N0
ENSMUSG00000027737	18865.1	543.381	37186.9	68.4361	6.09669	1.52927e-40	3.93181e-39	3	49846975	50398063	-	13922	Slc7a11	GO:0006865;GO:0006865;GO:0016020;GO:0016020;GO:0016021;GO:0016021;GO:0022857;GO:0055085;GO:0005791;GO:0005791;GO:0005856;GO:0005856;GO:0005886;GO:0005886;GO:0006749;GO:0006865;GO:0006865;GO:0006979;GO:0007420;GO:0007420;GO:0008542;GO:0009636;GO:0009636;GO:0009986;GO:0009986;GO:0014070;GO:0015179;GO:0016020;GO:0016020;GO:0016020;GO:0016021;GO:0016021;GO:0021591;GO:0021756;GO:0022857;GO:0030534;GO:…	K13869	-	E	12P2T;1CT91;09V1W;190VU;1AWIK;0V61J;0UM2S;0DIIE;KOG1287	solute carrier family 7 (cationic amino acid transporter, y+ system), member 11 [Source:MGI Symbol;Acc:MGI:1347355]	26570	Q9WTR6;Q542C8
ENSMUSG00000020300	8064.51	4071.91	12057.1	2.96104	1.56611	1.77922e-40	4.56656e-39	11	31822211	31885634	+	6369	Cpeb4	GO:0000900;GO:0002931;GO:0003676;GO:0003723;GO:0003723;GO:0003730;GO:0003730;GO:0005634;GO:0005634;GO:0005634;GO:0005634;GO:0005737;GO:0005737;GO:0005737;GO:0005737;GO:0005783;GO:0006412;GO:0006417;GO:0008135;GO:0014069;GO:0030054;GO:0030424;GO:0030425;GO:0030425;GO:0030426;GO:0035235;GO:0035235;GO:0036294;GO:0036294;GO:0042149;GO:0042149;GO:0042995;GO:0043005;GO:0043022;GO:0043197;GO:0043524;GO:…	K02602	-	J	195IC;12RYW;09UGD;1CQFN;0DFS4;KOG0129;0V5FQ;1B4EA;0UH7E	cytoplasmic polyadenylation element binding protein 4 [Source:MGI Symbol;Acc:MGI:1914829]	67579	Q7TN98;Q3TSF0
ENSMUSG00000037110	757.191	275.313	1239.07	4.50059	2.17011	2.24492e-40	5.75193e-39	2	146081799	146354264	-	18811	Ralgapa2	GO:0005096;GO:0005096;GO:0005634;GO:0043547;GO:0051056;GO:0005096;GO:0005096;GO:0005634;GO:0005737;GO:0005829;GO:0005886;GO:0043547;GO:0051056;GO:0005096;GO:0005096;GO:0005634;GO:0043547;GO:0051056;GO:0005096;GO:0005096;GO:0005096;GO:0005096;GO:0005634;GO:0005737;GO:0005737;GO:0005737;GO:0005829;GO:0005829;GO:0005886;GO:0032484;GO:0032880;GO:0043547;GO:0046982;GO:0046982;GO:0051056;GO:0060178;GO:…	-	-	T	1ARHB;0DEEZ;0UFCR;18S8A;09T3U;1CP4Q;0V42K;12NG2;KOG3686	Ral GTPase activating protein, alpha subunit 2 (catalytic) [Source:MGI Symbol;Acc:MGI:3036245]	241694	A3KGS3;A0A0A0MQD7
ENSMUSG00000118668	1484.63	640.466	2328.79	3.63608	1.86238	2.27227e-40	5.81201e-39	19	6806578	6818004	-	3581	RPS6KA4	GO:0000166;GO:0000287;GO:0004672;GO:0004674;GO:0004674;GO:0004674;GO:0004674;GO:0004674;GO:0005515;GO:0005524;GO:0005524;GO:0005524;GO:0005524;GO:0005634;GO:0005634;GO:0005634;GO:0005654;GO:0005654;GO:0005654;GO:0005737;GO:0005829;GO:0005829;GO:0006355;GO:0006355;GO:0006355;GO:0006355;GO:0006468;GO:0006468;GO:0006468;GO:0006468;GO:0006954;GO:0016301;GO:0016310;GO:0016572;GO:0016740;GO:0018105;GO:…	-	-	-	-	ribosomal protein S6 kinase, polypeptide 4 [Source:NCBI gene (formerly Entrezgene);Acc:56613]	-	-
ENSMUSG00000039285	1919.21	862.805	2975.62	3.44877	1.78608	2.40346e-40	6.13706e-39	9	117869567	117898862	+	6439	Azi2	GO:0000278;GO:0005515;GO:0005737;GO:0005737;GO:0005737;GO:0007249;GO:0007249;GO:0042110;GO:0044565;GO:0097028;GO:0000278;GO:0005515;GO:0005737;GO:0005737;GO:0005737;GO:0007249;GO:0007249;GO:0042110;GO:0044565;GO:0097028;GO:0000278;GO:0005515;GO:0005737;GO:0005737;GO:0005737;GO:0007249;GO:0007249;GO:0042110;GO:0044565;GO:0097028;GO:0000278;GO:0005515;GO:0005737;GO:0005737;GO:0005737;GO:0007249;GO:…	K12651	-	Z;T	0IG4Z;18YPH;1CVQA;0VAA0;1B0FR;0DKV9;0UNBB;09ZCZ;12RWX	5-azacytidine induced gene 2 [Source:MGI Symbol;Acc:MGI:1351332]	27215	Q9QYP6
ENSMUSG00000033545	2700.44	1266.29	4134.58	3.26512	1.70713	2.4099e-40	6.14299e-39	8	112262729	112352662	+	7018	Znrf1	GO:0004842;GO:0005515;GO:0005764;GO:0005768;GO:0005768;GO:0005768;GO:0005829;GO:0005829;GO:0007010;GO:0016020;GO:0016020;GO:0016020;GO:0016567;GO:0016740;GO:0030054;GO:0030672;GO:0031410;GO:0043161;GO:0045202;GO:0046872;GO:0061630;GO:0061630;GO:0070936;GO:0046872;GO:0004842;GO:0005515;GO:0005764;GO:0005768;GO:0005768;GO:0005829;GO:0007010;GO:0016020;GO:0016020;GO:0016567;GO:0016740;GO:0030054;GO:…	K10694	EC:2.3.2.27	O	1D19W;KOG0801;193GT;1AUJX;0VFD7;0DQ34;0UNWG;0A3H2;13UVR	zinc and ring finger 1 [Source:MGI Symbol;Acc:MGI:2177308]	170737	Q91V17
ENSMUSG00000019210	4534.5	2225.41	6843.59	3.07521	1.62068	2.54058e-40	6.46503e-39	6	120771266	120799754	-	4110	Atp6v1e1	GO:0005515;GO:0005737;GO:0005739;GO:0005768;GO:0005829;GO:0005902;GO:0006811;GO:0008553;GO:0008553;GO:0016324;GO:0016324;GO:0016787;GO:0033178;GO:0046961;GO:0051117;GO:0051117;GO:1902600;GO:1902600;GO:0006811;GO:0033178;GO:0046961;GO:1902600;GO:0006811;GO:0033178;GO:0046961;GO:1902600;GO:0006811;GO:0033178;GO:0046961;GO:1902600;	K02150	-	C	12Q2D;0V7NZ;1CSQZ;0UH8X;0DI07;18UG0;KOG1664;09WQG;1ASWZ	ATPase, H+ transporting, lysosomal V1 subunit E1 [Source:MGI Symbol;Acc:MGI:894326]	11973	P50518
ENSMUSG00000009090	1834.25	2852.31	816.184	0.286148	-1.80516	3.13429e-40	7.96227e-39	11	4936824	4992791	+	4957	Ap1b1	GO:0006886;GO:0015031;GO:0015031;GO:0016020;GO:0016192;GO:0030117;GO:0030131;GO:0030276;GO:0001822;GO:0005515;GO:0005794;GO:0005794;GO:0005794;GO:0005802;GO:0005829;GO:0005829;GO:0006886;GO:0006886;GO:0007368;GO:0007507;GO:0015031;GO:0015031;GO:0016020;GO:0016192;GO:0016192;GO:0016192;GO:0019901;GO:0030117;GO:0030131;GO:0030276;GO:0030665;GO:0031410;GO:0043231;GO:0043231;GO:0048268;GO:0006886;GO:…	K12392	-	U	12PEG;1CX4B;0DN7R;09WY9;0V7WF;18TC3;KOG1061;1AS6A;0URHT	adaptor protein complex AP-1, beta 1 subunit [Source:MGI Symbol;Acc:MGI:1096368]	11764	O35643;Q8CC13
ENSMUSG00000055447	5722.62	2844.61	8600.62	3.02348	1.59621	3.1849e-40	8.07707e-39	16	49620896	49735373	+	6276	Cd47	GO:0005887;GO:0016020;GO:0016021;GO:0022409;GO:0050729;GO:0050766;GO:0070053;GO:0005887;GO:0016020;GO:0016021;GO:0022409;GO:0050729;GO:0050766;GO:0070053;GO:0005887;GO:0016020;GO:0016021;GO:0022409;GO:0050729;GO:0050766;GO:0070053;GO:0005886;GO:0005887;GO:0016020;GO:0016021;GO:0022409;GO:0050729;GO:0050766;GO:0070053;GO:0005886;GO:0005887;GO:0016020;GO:0016021;GO:0022409;GO:0050729;GO:0050766;GO:…	K06266	-	W;T	1CVN9;0IJTS;0DKTE;0V8YT;191G3;13MME;0UPUW;1B473;09ZB3	CD47 antigen (Rh-related antigen, integrin- associated signal transducer) [Source:MGI Symbol;Acc:MGI:96617]	16423	Q61735
ENSMUSG00000031429	718.978	257.77	1180.19	4.57844	2.19486	3.32359e-40	8.41449e-39	X	139849178	139857477	-	1469	Psmd10	GO:0000122;GO:0000122;GO:0000122;GO:0000502;GO:0000502;GO:0000502;GO:0005515;GO:0005634;GO:0005634;GO:0005634;GO:0005737;GO:0005737;GO:0005737;GO:0005829;GO:0005829;GO:0006915;GO:0007253;GO:0007253;GO:0007253;GO:0008134;GO:0008134;GO:0008540;GO:0008540;GO:0030307;GO:0030307;GO:0030307;GO:0031398;GO:0031398;GO:0031398;GO:0032088;GO:0032088;GO:0032088;GO:0032436;GO:0032436;GO:0032436;GO:0043066;GO:…	K06694	-	O;K	09WNQ;13KG3;0V7M9;0DHYA;1B0US;0UKA2;KOG4412;1CSNW;192DH	proteasome (prosome, macropain) 26S subunit, non- ATPase, 10 [Source:MGI Symbol;Acc:MGI:1858898]	53380	Q9Z2X2
ENSMUSG00000023460	1711.33	757.979	2664.68	3.5155	1.81373	3.4865e-40	8.81199e-39	17	66801507	66826724	-	3033	Rab12	GO:0003924;GO:0005525;GO:0032482;GO:0000139;GO:0000166;GO:0003924;GO:0005525;GO:0005525;GO:0005764;GO:0005765;GO:0005768;GO:0005768;GO:0005776;GO:0005794;GO:0005794;GO:0005886;GO:0006904;GO:0006914;GO:0008021;GO:0008333;GO:0009306;GO:0015031;GO:0016020;GO:0016239;GO:0017157;GO:0019003;GO:0019003;GO:0030141;GO:0031410;GO:0032482;GO:0032593;GO:0032869;GO:0044257;GO:0045335;GO:0055037;GO:0055038;GO:…	K07907	-	U	1CRJQ;13HMG;0DNJC;0UNEF;0VBUE;1B4WU;KOG0078;0A0Y3;18Z01	RAB12, member RAS oncogene family [Source:MGI Symbol;Acc:MGI:894284]	19328	P35283
ENSMUSG00000041238	730.113	262.894	1197.33	4.55444	2.18727	3.60395e-40	9.09342e-39	18	11766333	11878278	+	12521	Rbbp8	GO:0000014;GO:0000014;GO:0000082;GO:0000403;GO:0000406;GO:0000724;GO:0000724;GO:0001103;GO:0001835;GO:0003677;GO:0003684;GO:0003684;GO:0003690;GO:0003697;GO:0003714;GO:0004518;GO:0004519;GO:0004519;GO:0005634;GO:0005634;GO:0005654;GO:0005654;GO:0005694;GO:0006281;GO:0006281;GO:0006974;GO:0007049;GO:0010792;GO:0010792;GO:0010792;GO:0016787;GO:0017053;GO:0032355;GO:0035861;GO:0042802;GO:0043231;GO:…	K20773	EC:3.1.-.-	K;B	18Y2F;09VS1;1ARE3;0UJ0N;0IJ39;0DH0K;13FN3;1CRQW;0V6QZ	retinoblastoma binding protein 8, endonuclease [Source:MGI Symbol;Acc:MGI:2442995]	225182	Q80YR6
ENSMUSG00000041645	2566.46	1200.86	3932.06	3.27436	1.71121	4.26714e-40	1.07486e-38	12	103374241	103392089	-	8242	Ddx24	GO:0000166;GO:0003676;GO:0003723;GO:0003724;GO:0004386;GO:0004386;GO:0005524;GO:0005524;GO:0005730;GO:0005730;GO:0016787;GO:0000166;GO:0003676;GO:0003724;GO:0004386;GO:0004386;GO:0005524;GO:0005524;GO:0005730;GO:0016787;GO:0000166;GO:0003676;GO:0003724;GO:0004386;GO:0004386;GO:0005524;GO:0005524;GO:0016787;	K14805	EC:3.6.4.13	A	0VA9D;18XD4;0UIVY;0DP9T;1CY7U;KOG0347;09ZC7;1B2TC;12NJ7	DEAD box helicase 24 [Source:MGI Symbol;Acc:MGI:1351337]	27225	Q9ESV0
ENSMUSG00000000282	1110.72	1776.57	444.869	0.250409	-1.99764	4.62076e-40	1.16197e-38	11	74721746	74736551	+	4627	Mnt	GO:0000122;GO:0000122;GO:0000785;GO:0000977;GO:0000977;GO:0000978;GO:0000981;GO:0001227;GO:0001227;GO:0003677;GO:0003677;GO:0003682;GO:0003700;GO:0005515;GO:0005634;GO:0005634;GO:0005654;GO:0005654;GO:0006355;GO:0006357;GO:0007569;GO:0046983;GO:0051726;GO:2001234;GO:0046983;	K09115	-	K	0V2ZQ;KOG2483;1974W;1DF0E;13CCX;0WGFF;0E813;1BAWD;0B409	max binding protein [Source:MGI Symbol;Acc:MGI:109150]	17428	O08789
ENSMUSG00000036894	2264.02	1045.82	3482.21	3.32963	1.73536	6.74004e-40	1.69205e-38	3	61269059	61275851	+	6793	Rap2b	GO:0000166;GO:0003924;GO:0003924;GO:0003924;GO:0005525;GO:0005525;GO:0005525;GO:0005525;GO:0005525;GO:0005768;GO:0005829;GO:0005829;GO:0005886;GO:0005886;GO:0005886;GO:0005923;GO:0005923;GO:0007165;GO:0010008;GO:0016020;GO:0016020;GO:0016020;GO:0016020;GO:0016787;GO:0019003;GO:0019003;GO:0019003;GO:0019904;GO:0030168;GO:0030168;GO:0030336;GO:0030336;GO:0031954;GO:0031954;GO:0032486;GO:0032486;GO:…	K07838	-	S;J	0V7XB;190FZ;0DI9U;0UKQK;1CT0A;1B2XE;09WZA;KOG0395;12RFZ	RAP2B, member of RAS oncogene family [Source:MGI Symbol;Acc:MGI:1921262]	74012	P61226;Q6ZWR0
ENSMUSG00000013707	762.344	1251.93	272.76	0.217872	-2.19844	7.17207e-40	1.79748e-38	3	95046832	95049671	-	1122	Tnfaip8l2	GO:0002376;GO:0005515;GO:0005737;GO:0005737;GO:0042981;GO:0045087;GO:0050728;GO:0050728;GO:0050868;GO:0050868;	-	-	T	0IGTQ;0DN5T;1ASFU;0VBEW;0UGRS;18SKZ;1CX2B;12SWJ;0A0IR	tumor necrosis factor, alpha-induced protein 8-like 2 [Source:MGI Symbol;Acc:MGI:1917019]	69769	Q9D8Y7
ENSMUSG00000047959	209.245	18.6802	399.811	21.4029	4.41973	8.29898e-40	2.07642e-38	3	106943485	106945386	+	1902	Kcna3	GO:0005216;GO:0005244;GO:0005249;GO:0005249;GO:0005249;GO:0005249;GO:0005251;GO:0005251;GO:0005251;GO:0005267;GO:0005886;GO:0005886;GO:0005886;GO:0005887;GO:0005887;GO:0006811;GO:0006811;GO:0006813;GO:0006813;GO:0008076;GO:0008076;GO:0015271;GO:0015271;GO:0016020;GO:0016020;GO:0016021;GO:0016021;GO:0030424;GO:0030424;GO:0034765;GO:0044305;GO:0044305;GO:0045121;GO:0045121;GO:0051260;GO:0055085;GO:…	K04876	-	P	0UFUA;18WGP;1CQJ8;09UK7;0DFVW;KOG1545;12QRV;0V5JH;1ARP7	potassium voltage-gated channel, shaker-related subfamily, member 3 [Source:MGI Symbol;Acc:MGI:96660]	16491	P16390
ENSMUSG00000055723	551.598	83.038	1020.16	12.2854	3.61888	9.42691e-40	2.35313e-38	7	113646017	113717016	-	3554	Rras2	GO:0000139;GO:0000166;GO:0003924;GO:0003924;GO:0005515;GO:0005525;GO:0005525;GO:0005525;GO:0005794;GO:0005886;GO:0005886;GO:0007165;GO:0007265;GO:0007265;GO:0009987;GO:0016020;GO:0016020;GO:0016787;GO:0019003;GO:0030335;GO:1901214;GO:1901214;GO:0000166;GO:0003924;GO:0005525;GO:0005525;GO:0007165;GO:0016020;	K07830	-	S;J	1ASZ6;09UJX;0DFVI;0UHBU;12RTQ;KOG0395;0V5J4;18TWC;1CQIX	related RAS viral (r-ras) oncogene 2 [Source:MGI Symbol;Acc:MGI:1914172]	66922	P62071;Q9CTF6
ENSMUSG00000016559	13471.6	6933.78	20009.4	2.88579	1.52897	9.43651e-40	2.35313e-38	11	115912738	115918788	-	2976	H3f3b	GO:0000228;GO:0000781;GO:0000786;GO:0000786;GO:0000786;GO:0000978;GO:0000979;GO:0001649;GO:0001740;GO:0003677;GO:0003677;GO:0005634;GO:0005634;GO:0005634;GO:0005654;GO:0005694;GO:0006997;GO:0007283;GO:0007286;GO:0007338;GO:0007566;GO:0008283;GO:0008584;GO:0031492;GO:0031508;GO:0031509;GO:0032991;GO:0035264;GO:0042692;GO:0046982;GO:0048477;GO:0090230;GO:1902340;GO:0000228;GO:0000781;GO:0000786;GO:…	K11253	-	B	KOG1745;0VHGA;192P3;0DTMN;0UV0S;1B5EX;0A6N5;13PQG;1D2Z6	H3.3 histone B [Source:MGI Symbol;Acc:MGI:1101768]	15081	P84244
ENSMUSG00000031530	2013.93	919.994	3107.87	3.37814	1.75623	1.07657e-39	2.6801e-38	8	35274451	35287048	+	2740	Dusp4	GO:0000188;GO:0000188;GO:0000188;GO:0001706;GO:0004721;GO:0004721;GO:0004722;GO:0004725;GO:0004725;GO:0004725;GO:0005634;GO:0005634;GO:0005634;GO:0005654;GO:0005737;GO:0006470;GO:0006470;GO:0006470;GO:0008138;GO:0008330;GO:0008330;GO:0008330;GO:0016311;GO:0016311;GO:0016311;GO:0016787;GO:0016791;GO:0016791;GO:0016791;GO:0017017;GO:0017017;GO:0017017;GO:0035335;GO:0035335;GO:0035335;GO:0035970;GO:…	K04459	-	V	0DIVA;1AXG8;13H9Y;0V8FX;09XHW;1CTKP;18YFD;KOG1716;0UPHN	dual specificity phosphatase 4 [Source:MGI Symbol;Acc:MGI:2442191]	319520	Q8BFV3
ENSMUSG00000048142	144.138	281.563	6.7116	0.0238369	-5.39066	1.12451e-39	2.79477e-38	5	34153328	34163260	+	6670	Nat8l	GO:0005737;GO:0005739;GO:0008080;GO:0016020;GO:0016021;GO:0017188;GO:0017188;GO:0031966;GO:0031966;	K18309	EC:2.3.1.17	S;M	0V3I7;1BB9Q;13EVS;0E8ZC;0IS8M;1DFVN;0B5K6;0WI7T	N-acetyltransferase 8-like [Source:MGI Symbol;Acc:MGI:2447776]	269642	Q3UGX3;A0A0R4J0R4
ENSMUSG00000025190	1120.57	1885.32	355.815	0.18873	-2.40561	1.18774e-39	2.94702e-38	19	43488191	43513044	-	2539	Got1	GO:0003824;GO:0004069;GO:0004069;GO:0004069;GO:0004069;GO:0004069;GO:0004609;GO:0005654;GO:0005654;GO:0005737;GO:0005737;GO:0005737;GO:0005737;GO:0005764;GO:0005764;GO:0005829;GO:0005829;GO:0005829;GO:0005829;GO:0006103;GO:0006107;GO:0006107;GO:0006114;GO:0006114;GO:0006520;GO:0006531;GO:0006531;GO:0006531;GO:0006532;GO:0006532;GO:0006533;GO:0006533;GO:0006536;GO:0007219;GO:0008483;GO:0008483;GO:…	K14454	EC:2.6.1.1	E	0UNN0;1CWMN;0V497;18XN6;12PGV;1B02D;KOG1411;09TA6;0DMS0	glutamic-oxaloacetic transaminase 1, soluble [Source:MGI Symbol;Acc:MGI:95791]	14718	P05201
ENSMUSG00000017561	1987.96	907.335	3068.59	3.38198	1.75787	1.30766e-39	3.23918e-38	11	79937319	79971817	-	4261	Crlf3	GO:0000082;GO:0000082;GO:0003677;GO:0005634;GO:0005737;GO:0005737;GO:0005829;GO:0005886;GO:0030308;GO:0030308;GO:0042802;GO:0045893;GO:0045893;GO:0045944;GO:0045944;GO:0046427;GO:0046427;GO:0071158;GO:0071158;GO:0000082;GO:0000082;GO:0003677;GO:0005634;GO:0005737;GO:0005737;GO:0005829;GO:0005886;GO:0030308;GO:0030308;GO:0042802;GO:0045893;GO:0045893;GO:0045944;GO:0045944;GO:0046427;GO:0046427;GO:…	K24482	-	K	1CXAU;0A0SH;0II83;1B0V2;0DN88;18T9U;0UP5H;132VC;0VBNS	cytokine receptor-like factor 3 [Source:MGI Symbol;Acc:MGI:1860086]	54394	Q9Z2L7
ENSMUSG00000030681	4244.39	2088.82	6399.97	3.06391	1.61538	1.53685e-39	3.80059e-38	7	126586032	126613793	-	7627	Mvp	GO:0005634;GO:0005634;GO:0005737;GO:0005737;GO:0005829;GO:0005856;GO:0019901;GO:0019903;GO:0031953;GO:0038127;GO:0042059;GO:0042802;GO:0048471;GO:0061099;	K17266	-	Z	0DN21;1CWYE;0UIB6;1ATVH;0A0F8;18UVY;0VBBH;0IF6T;13JAZ	major vault protein [Source:MGI Symbol;Acc:MGI:1925638]	78388	E9Q3X0;Q3U7S9
ENSMUSG00000049643	707.527	1167.13	247.924	0.212422	-2.235	2.1315e-39	5.2624e-38	7	27252658	27281524	+	4780	2310022A10Rik	GO:0005654;	-	-	S;O	0UQ1C;KOG3930;0VADG;18TF1;09ZGE;0DKZ1;1ARC0;13C8W;1CVTX	RIKEN cDNA 2310022A10 gene [Source:MGI Symbol;Acc:MGI:1913617]	66367	Q8R3Y5;G5E8E3
ENSMUSG00000018750	1102.75	1758.69	446.807	0.254056	-1.97678	2.62119e-39	6.46068e-38	11	69656738	69674849	+	8117	Zbtb4	GO:0000122;GO:0000785;GO:0000977;GO:0000978;GO:0000981;GO:0001227;GO:0003677;GO:0005634;GO:0005634;GO:0005654;GO:0005694;GO:0005829;GO:0006355;GO:0006974;GO:0008327;GO:0010428;GO:0016604;GO:0019901;GO:0042803;GO:0043565;GO:0045892;GO:0046872;GO:0000122;GO:0000122;GO:0000785;GO:0000977;GO:0000977;GO:0000978;GO:0000981;GO:0001227;GO:0001227;GO:0003677;GO:0005634;GO:0005634;GO:0005634;GO:0005654;GO:…	K10491	-	K	0UU6G;18U2K;1CZ4M;0VA8V;0A2G8;0DQ3K;KOG1721;1AXXZ;139QB	zinc finger and BTB domain containing 4 [Source:MGI Symbol;Acc:MGI:1922830]	75580	Q5F293
ENSMUSG00000014361	2787.99	4275.27	1300.7	0.304239	-1.71672	3.26674e-39	8.03855e-38	2	128540876	128644814	+	4336	Mertk	GO:0000166;GO:0001750;GO:0001750;GO:0001779;GO:0001818;GO:0004672;GO:0004713;GO:0004713;GO:0004714;GO:0004714;GO:0005524;GO:0005524;GO:0005615;GO:0005615;GO:0005737;GO:0005737;GO:0005887;GO:0006468;GO:0006468;GO:0006468;GO:0006909;GO:0006909;GO:0006909;GO:0006909;GO:0007169;GO:0007275;GO:0007283;GO:0007399;GO:0016020;GO:0016021;GO:0016028;GO:0016028;GO:0016301;GO:0016310;GO:0016477;GO:0016740;GO:…	K05117	EC:2.7.10.1	T	13IZU;1AZCJ;18X9J;0DHUI;0V7HR;0IG6I;0UPQB;1CSJ4;09WJ5	MER proto-oncogene tyrosine kinase [Source:MGI Symbol;Acc:MGI:96965]	17289	Q60805
ENSMUSG00000076441	674.413	76.8079	1272.02	16.561	4.04972	3.53635e-39	8.68766e-38	2	31360219	31410684	+	2414	Ass1	GO:0000050;GO:0000050;GO:0000050;GO:0000050;GO:0000050;GO:0000052;GO:0000052;GO:0000053;GO:0000053;GO:0000053;GO:0000053;GO:0000166;GO:0001822;GO:0001889;GO:0004055;GO:0004055;GO:0004055;GO:0004055;GO:0004055;GO:0004055;GO:0005515;GO:0005524;GO:0005524;GO:0005634;GO:0005634;GO:0005737;GO:0005737;GO:0005737;GO:0005737;GO:0005739;GO:0005741;GO:0005741;GO:0005764;GO:0005764;GO:0005783;GO:0005783;GO:…	K01940	EC:6.3.4.5	H;E	1CT5Y;0DIF9;1AS8M;13I7G;0V7D8;KOG1706;0UKYR;09X47;18T3I	argininosuccinate synthetase 1 [Source:MGI Symbol;Acc:MGI:88090]	11898	P16460;Q3UJ34
ENSMUSG00000022817	5077.27	7611.97	2542.57	0.334023	-1.58198	3.7426e-39	9.17922e-38	16	33650035	33769708	+	3553	Itgb5	GO:0007155;GO:0007229;GO:0007229;GO:0008305;GO:0016020;GO:0016021;GO:0038023;GO:0007155;GO:0007160;GO:0007179;GO:0007229;GO:0007229;GO:0007229;GO:0008305;GO:0009986;GO:0016020;GO:0016021;GO:0034684;GO:0035987;GO:0038023;GO:0043149;GO:0043235;GO:0090136;GO:0007155;GO:0007229;GO:0007229;GO:0008305;GO:0016020;GO:0016021;GO:0038023;	K06588	-	W	0DG9T;0V602;09V0A;1CSSC;19559;12SZY;KOG1226;1B3MK;0UGX1	integrin beta 5 [Source:MGI Symbol;Acc:MGI:96614]	16419	O70309;Q6PE70
ENSMUSG00000021149	1393.1	606.467	2179.73	3.59415	1.84565	6.41071e-39	1.56973e-37	13	9016367	9046119	-	9566	Gtpbp4	GO:0000079;GO:0000079;GO:0000079;GO:0000166;GO:0000463;GO:0003924;GO:0003924;GO:0003924;GO:0005525;GO:0005525;GO:0005525;GO:0005525;GO:0005525;GO:0005634;GO:0005634;GO:0005634;GO:0005634;GO:0005654;GO:0005654;GO:0005730;GO:0005730;GO:0005730;GO:0005730;GO:0005737;GO:0005737;GO:0005737;GO:0005829;GO:0005829;GO:0008156;GO:0008156;GO:0008156;GO:0008285;GO:0008285;GO:0008285;GO:0022408;GO:0022408;GO:…	K06943	-	S;H;M	0V51G;1B09Z;0UQIP;18Z6A;1CXCW;0DNFK;KOG1490;09U2G;12NHM	GTP binding protein 4 [Source:MGI Symbol;Acc:MGI:1916487]	69237	Q99ME9
ENSMUSG00000045362	413.46	764.349	62.5712	0.081862	-3.61066	6.56731e-39	1.60544e-37	7	143161396	143182459	-	3218	Tnfrsf26	GO:0016020;GO:0016021;GO:0005886;GO:0009986;GO:0016020;GO:0016021;GO:0036462;GO:0043065;	K05161	-	T	196G5;1B8BX;1D5QS;0DWCJ;1482D;0AAZX;0VN00;0JFKD;0UWVH	tumor necrosis factor receptor superfamily, member 26 [Source:MGI Symbol;Acc:MGI:2651928]	244237	P83626;Q3U3N2
ENSMUSG00000039804	1580.61	703.117	2458.11	3.49601	1.80571	6.98489e-39	1.70472e-37	2	164842277	164876787	-	4383	Ncoa5	GO:0003682;GO:0005634;GO:0005654;GO:0005654;GO:0015629;GO:0015629;GO:0042593;GO:0046627;	-	-	K;Y;U	1B444;0UTNF;0DPJQ;18YDV;0A17B;13JZR;1CYB3;0VDZ5;KOG0845	nuclear receptor coactivator 5 [Source:MGI Symbol;Acc:MGI:2385165]	228869	Q91W39
ENSMUSG00000028494	15196.8	22943.8	7449.72	0.324694	-1.62285	7.06377e-39	1.72116e-37	4	86566623	86588297	-	3512	Plin2	GO:0005515;GO:0005515;GO:0005634;GO:0005737;GO:0005811;GO:0005811;GO:0005811;GO:0005811;GO:0005811;GO:0005829;GO:0005829;GO:0005886;GO:0010890;GO:0014070;GO:0015909;GO:0016020;GO:0019915;GO:0019915;GO:0042493;	K17284	-	U	1CWV7;0A0CC;0DMZ6;0VB8H;18SFU;0UHNB;13HK9;0IJG1;1AT8Z	perilipin 2 [Source:MGI Symbol;Acc:MGI:87920]	11520	P43883;Q3U711
ENSMUSG00000021892	4379.93	2177.43	6582.42	3.02301	1.59599	7.8697e-39	1.9144e-37	14	31081837	31158035	-	3194	Sh3bp5	GO:0004860;GO:0004860;GO:0005085;GO:0005085;GO:0005654;GO:0005737;GO:0005737;GO:0005739;GO:0005739;GO:0006469;GO:0016020;GO:0016604;GO:0017124;GO:0030659;GO:0030659;GO:0031410;GO:0035556;GO:0035556;GO:0035556;GO:0061099;GO:0004860;GO:0004860;GO:0005085;GO:0005085;GO:0005654;GO:0005737;GO:0005737;GO:0005739;GO:0005739;GO:0006469;GO:0016020;GO:0016604;GO:0017124;GO:0030659;GO:0030659;GO:0031410;GO:…	K23739	-	T	0UQ5B;0V80F;KOG2008;1CT3D;1AZVR;13KXD;09X27;0DICX;18TFN	SH3-domain binding protein 5 (BTK-associated) [Source:MGI Symbol;Acc:MGI:1344391]	24056	Q9Z131
ENSMUSG00000052821	472.524	144.205	800.843	5.55349	2.47339	8.17697e-39	1.98591e-37	X	105617952	105647285	-	5142	Cysltr1	GO:0001631;GO:0002437;GO:0004930;GO:0004930;GO:0004974;GO:0004974;GO:0005515;GO:0005886;GO:0005887;GO:0005887;GO:0006816;GO:0006935;GO:0006954;GO:0007165;GO:0007166;GO:0007186;GO:0007186;GO:0007218;GO:0008528;GO:0016020;GO:0016021;GO:0016021;GO:0045766;GO:0045907;GO:0061737;GO:0001631;GO:0002437;GO:0004930;GO:0004930;GO:0004974;GO:0004974;GO:0005515;GO:0005886;GO:0005887;GO:0005887;GO:0006816;GO:…	K04322	-	T	0VD7D;13JPV;0A2WA;1B39G;0DQSJ;1CZVY;0UTY6;0IKK2;18Y94	cysteinyl leukotriene receptor 1 [Source:MGI Symbol;Acc:MGI:1926218]	58861	Q99JA4
ENSMUSG00000021569	225.193	38.9711	411.415	10.5569	3.40012	9.89261e-39	2.39868e-37	13	74059466	74085903	-	3472	Trip13	GO:0000166;GO:0001556;GO:0001673;GO:0005515;GO:0005515;GO:0005524;GO:0005524;GO:0005634;GO:0005694;GO:0006302;GO:0006302;GO:0007094;GO:0007094;GO:0007094;GO:0007130;GO:0007131;GO:0007131;GO:0007131;GO:0007141;GO:0007144;GO:0007283;GO:0007286;GO:0016887;GO:0030154;GO:0042802;GO:0042802;GO:0048477;GO:0051321;GO:0051598;	K22399	-	O;L	1CWV6;0DMZ5;KOG0744;1ASQA;18TM6;0V8XF;12QUM;0UFP3;09XZQ	thyroid hormone receptor interactor 13 [Source:MGI Symbol;Acc:MGI:1916966]	69716	Q3UA06
ENSMUSG00000042500	430.214	741.944	118.483	0.159693	-2.64663	1.18816e-38	2.87628e-37	4	126383334	126427265	-	6947	Ago4	GO:0000932;GO:0000932;GO:0003676;GO:0003723;GO:0003723;GO:0003725;GO:0003725;GO:0003727;GO:0003727;GO:0005634;GO:0005737;GO:0005737;GO:0005737;GO:0005829;GO:0006402;GO:0006402;GO:0006402;GO:0006417;GO:0007130;GO:0007140;GO:0008584;GO:0010501;GO:0010501;GO:0010586;GO:0016442;GO:0016442;GO:0016442;GO:0022604;GO:0031047;GO:0031054;GO:0031054;GO:0035196;GO:0035196;GO:0035198;GO:0035198;GO:0035198;GO:…	K11593	-	J	0DGFB;18VEZ;KOG1041;0V66Q;1CRPD;1AYGU;09V75;12N2H;0UGEN	argonaute RISC catalytic subunit 4 [Source:MGI Symbol;Acc:MGI:1924100]	76850	Q8CJF8;Q9CS58
ENSMUSG00000058099	4798.64	7186.07	2411.21	0.335539	-1.57545	1.2075e-38	2.91835e-37	15	82877174	82917507	-	7970	Nfam1	GO:0001819;GO:0004888;GO:0004888;GO:0004888;GO:0004888;GO:0005886;GO:0007165;GO:0007165;GO:0009986;GO:0016020;GO:0016021;GO:0016021;GO:0016021;GO:0016021;GO:0016021;GO:0030183;GO:0035556;GO:0035556;GO:0045121;GO:0045121;GO:0045577;GO:0045577;GO:0050853;GO:0050853;GO:0050861;GO:0050861;GO:0051091;GO:0051091;GO:0001819;GO:0004888;GO:0004888;GO:0004888;GO:0004888;GO:0005886;GO:0007165;GO:0007165;GO:…	-	-	T	193IK;0DRHV;0VESY;1B4W8;0A3Y2;13WFS;1D0QC;0J2TX;0UN39	Nfat activating molecule with ITAM motif 1 [Source:MGI Symbol;Acc:MGI:1921289]	74039	Q8R4V1
ENSMUSG00000004266	4532.34	2260.86	6803.82	3.00939	1.58947	1.33397e-38	3.2188e-37	6	124697670	124715677	-	2802	Ptpn6	GO:0001784;GO:0002244;GO:0002924;GO:0004721;GO:0004725;GO:0004725;GO:0004725;GO:0004725;GO:0004725;GO:0005001;GO:0005001;GO:0005515;GO:0005515;GO:0005515;GO:0005515;GO:0005515;GO:0005634;GO:0005634;GO:0005654;GO:0005730;GO:0005737;GO:0005737;GO:0005829;GO:0005911;GO:0006470;GO:0006470;GO:0008284;GO:0014068;GO:0016311;GO:0016787;GO:0016791;GO:0017124;GO:0018108;GO:0019221;GO:0019901;GO:0030154;GO:…	K05697	EC:3.1.3.48	T	0V6WW;18S1Y;0DH76;KOG0790;1AUIG;1CRXA;09VYG;132K8;0UPD5	protein tyrosine phosphatase, non-receptor type 6 [Source:MGI Symbol;Acc:MGI:96055]	15170	P29351;Q3UB72
ENSMUSG00000029313	4750.59	2388.37	7112.8	2.9781	1.57439	1.79704e-38	4.32915e-37	5	103840240	104003188	+	9458	Aff1	GO:0005634;GO:0005634;GO:0010468;GO:0010468;GO:0005634;GO:0005634;GO:0008023;GO:0010468;	K15184	-	K	1AUUS;1CPFG;0V6ID;13I7E;09VJ9;0IGJB;0UKUW;18T0P;0DERP	AF4/FMR2 family, member 1 [Source:MGI Symbol;Acc:MGI:1100819]	17355	A3KMF4;E9Q921;Q3UP77
ENSMUSG00000031451	3443.47	5195.52	1691.41	0.325552	-1.61904	1.86766e-38	4.49202e-37	8	13515374	13544490	-	2548	Gas6	GO:0001764;GO:0001786;GO:0001786;GO:0001786;GO:0001934;GO:0001934;GO:0001934;GO:0001934;GO:0001961;GO:0001961;GO:0001961;GO:0003104;GO:0003104;GO:0003104;GO:0005102;GO:0005102;GO:0005102;GO:0005509;GO:0005576;GO:0005576;GO:0005615;GO:0005615;GO:0005615;GO:0005615;GO:0005737;GO:0005737;GO:0005737;GO:0006468;GO:0006468;GO:0006468;GO:0006909;GO:0006909;GO:0006909;GO:0006915;GO:0007165;GO:0007165;GO:…	K05464	-	T	1CT5S;0DIF7;0UJHC;0V9VU;18U3T;12RD2;1AT6K;0IGK1;09YY3	growth arrest specific 6 [Source:MGI Symbol;Acc:MGI:95660]	14456	Q61592
ENSMUSG00000005514	7733.43	12296.8	3170.06	0.257795	-1.9557	1.95778e-38	4.70119e-37	5	135698887	135764180	+	4021	Por	GO:0010181;GO:0016020;GO:0016021;GO:0016491;GO:0055114;GO:0010181;GO:0016020;GO:0016021;GO:0055114;GO:0003420;GO:0003420;GO:0003958;GO:0003958;GO:0003958;GO:0003958;GO:0003958;GO:0004128;GO:0004128;GO:0005737;GO:0005739;GO:0005739;GO:0005783;GO:0005789;GO:0005829;GO:0007584;GO:0008941;GO:0008941;GO:0009055;GO:0009055;GO:0009437;GO:0009725;GO:0009812;GO:0010181;GO:0010181;GO:0010181;GO:0010181;GO:…	K00327	EC:1.6.2.4	C	0V437;1CPFH;09TEP;1ARM6;18SCJ;0UFSC;KOG1158;12N1H;0DERQ	P450 (cytochrome) oxidoreductase [Source:MGI Symbol;Acc:MGI:97744]	18984	P37040
ENSMUSG00000015733	8353.53	4309.67	12397.4	2.87665	1.52439	2.35819e-38	5.6536e-37	6	17636233	17666971	+	5890	Capza2	GO:0003779;GO:0005515;GO:0005903;GO:0008290;GO:0008290;GO:0008290;GO:0008290;GO:0016020;GO:0030036;GO:0030863;GO:0051015;GO:0051016;GO:0051016;GO:0051016;GO:0051693;GO:0003779;GO:0008290;GO:0008290;GO:0051016;GO:0051016;GO:0051693;GO:0003779;GO:0008290;GO:0008290;GO:0051016;GO:0051016;GO:0051693;	K10364	-	Z	18TN4;1CPRA;0DF1H;12PIR;0V4QH;KOG0836;09TR6;1B2P6;0UG5Y	capping protein (actin filament) muscle Z-line, alpha 2 [Source:MGI Symbol;Acc:MGI:106222]	12343	P47754;Q5DQJ3
ENSMUSG00000024424	943.207	184.088	1702.33	9.24736	3.20904	2.4721e-38	5.91717e-37	18	12732953	12871920	+	7234	Ttc39c	-	-	-	S;U	KOG3783;13G5Z;1DGEB;197H1;0V3WV;0B6FZ;0WJ6D;1BBJ9;0E9JA	tetratricopeptide repeat domain 39C [Source:MGI Symbol;Acc:MGI:1919997]	72747	Q8VE09;A0A3Q4EGC9;Q8BJQ0
ENSMUSG00000034855	3203.34	3.71479	6402.96	1723.64	10.7512	2.66818e-38	6.37627e-37	5	92494497	92496748	-	2252	Cxcl10	GO:0002690;GO:0005125;GO:0005576;GO:0005576;GO:0005576;GO:0005576;GO:0005615;GO:0005615;GO:0005615;GO:0006935;GO:0006935;GO:0006935;GO:0006935;GO:0006952;GO:0006954;GO:0006954;GO:0006955;GO:0006955;GO:0007186;GO:0007186;GO:0007186;GO:0007189;GO:0007189;GO:0007189;GO:0008009;GO:0008009;GO:0008009;GO:0008009;GO:0008009;GO:0008201;GO:0008201;GO:0008284;GO:0009617;GO:0009897;GO:0010818;GO:0010818;GO:…	K12671	-	W	13VPQ;1B6SH;1D56C;193TZ;0DVW2;0A9VR;0VKR5;0UWIU;0J1VC	chemokine (C-X-C motif) ligand 10 [Source:MGI Symbol;Acc:MGI:1352450]	15945	P17515;Q548V9
ENSMUSG00000068015	849.748	331.861	1367.64	4.12111	2.04303	2.70887e-38	6.46314e-37	14	74992115	75185316	-	7734	Lrch1	GO:0005515;GO:0005737;GO:0005737;GO:0005737;GO:0005737;GO:0034260;GO:0034260;GO:0034260;GO:1990869;GO:1990869;GO:1990869;GO:1990869;GO:2000405;GO:2000405;GO:2000405;GO:2000405;GO:0016020;GO:0016021;	-	-	Z;T	0UM74;KOG0619;09VZD;18XBF;0V6XT;0DH86;1CRYA;KOG0532;1ATK0;12TVR	leucine-rich repeats and calponin homology (CH) domain containing 1 [Source:MGI Symbol;Acc:MGI:2443390]	380916	P62046
ENSMUSG00000026942	788.877	300.621	1277.13	4.24832	2.08689	2.7484e-38	6.54698e-37	2	25407994	25436952	-	5101	Traf2	GO:0000151;GO:0002637;GO:0002726;GO:0002947;GO:0004842;GO:0004842;GO:0004842;GO:0004842;GO:0005164;GO:0005164;GO:0005164;GO:0005164;GO:0005174;GO:0005515;GO:0005515;GO:0005515;GO:0005515;GO:0005737;GO:0005737;GO:0005737;GO:0005829;GO:0005829;GO:0005938;GO:0006915;GO:0007165;GO:0007165;GO:0007250;GO:0007250;GO:0008270;GO:0008270;GO:0008289;GO:0009898;GO:0009898;GO:0012506;GO:0016567;GO:0016740;GO:…	K03173	EC:2.3.2.27	O;T	0V3IY;1BBA7;0B5ND;1DFWV;0ISDM;13EZJ;0WIAF;0E90P	TNF receptor-associated factor 2 [Source:MGI Symbol;Acc:MGI:101835]	22030	P39429;Q3U8L1;Q8C6X9
ENSMUSG00000039470	218.499	37.6071	399.39	10.6201	3.40872	3.00022e-38	7.13544e-37	8	40876856	40963309	+	5528	Zdhhc2	GO:0000139;GO:0005768;GO:0005783;GO:0005783;GO:0005783;GO:0005783;GO:0005789;GO:0005789;GO:0005789;GO:0005794;GO:0005794;GO:0005794;GO:0005794;GO:0005886;GO:0005887;GO:0006612;GO:0014069;GO:0014069;GO:0014069;GO:0016020;GO:0016021;GO:0016188;GO:0016409;GO:0016409;GO:0016409;GO:0016740;GO:0016746;GO:0018215;GO:0018230;GO:0018230;GO:0018230;GO:0018230;GO:0018230;GO:0018345;GO:0018345;GO:0019705;GO:…	K20028	EC:2.3.1.225	S;O	1CSHR;0DHT9;18WVE;0V7GJ;1B3RV;09WI0;0UK2T;KOG1315;136R1	zinc finger, DHHC domain containing 2 [Source:MGI Symbol;Acc:MGI:1923452]	70546	P59267
ENSMUSG00000049624	1286.1	2082.07	490.134	0.235407	-2.08677	3.01653e-38	7.16281e-37	9	78443770	78495323	-	3627	Slc17a5	GO:0005764;GO:0005764;GO:0005764;GO:0005764;GO:0005765;GO:0005765;GO:0005765;GO:0005829;GO:0005829;GO:0005886;GO:0005886;GO:0005886;GO:0005887;GO:0006820;GO:0006865;GO:0009617;GO:0015136;GO:0015136;GO:0015136;GO:0015136;GO:0015293;GO:0015739;GO:0015739;GO:0015739;GO:0015739;GO:0016020;GO:0016021;GO:0016021;GO:0022857;GO:0022857;GO:0030054;GO:0030672;GO:0031410;GO:0031410;GO:0045202;GO:0055085;GO:…	K12301	-	P;G	18ZT2;0UFG6;1CP7I;12PZZ;0V45C;0DEHS;KOG2532;09T6K;1ARCV	solute carrier family 17 (anion/sugar transporter), member 5 [Source:MGI Symbol;Acc:MGI:1924105]	235504	Q8BN82
ENSMUSG00000025915	1833.06	842.772	2823.36	3.35009	1.7442	3.58247e-38	8.49313e-37	1	9868332	9971070	+	14311	Sgk3	GO:0000166;GO:0004672;GO:0004674;GO:0004674;GO:0004674;GO:0004674;GO:0005524;GO:0005524;GO:0005654;GO:0005768;GO:0005769;GO:0006468;GO:0015459;GO:0016301;GO:0016310;GO:0016740;GO:0018105;GO:0031410;GO:0031410;GO:0035091;GO:0035556;GO:0043231;GO:0055037;GO:0106310;GO:0106311;GO:2001240;GO:0000166;GO:0004672;GO:0004674;GO:0004674;GO:0005524;GO:0005524;GO:0006468;GO:0035091;GO:0000166;GO:0004672;GO:…	K13304	EC:2.7.11.1	Z;T;D;U	1CV05;09U4Q;18Z3N;KOG2101;0V53T;0DFEB;KOG0598;12P0N;0UMQC;1AYN4	serum/glucocorticoid regulated kinase 3 [Source:MGI Symbol;Acc:MGI:2182368]	170755	Q9ERE3
ENSMUSG00000002881	1982.29	880.149	3084.43	3.50445	1.80919	4.36969e-38	1.0343e-36	1	52496453	52539838	-	4100	Nab1	GO:0003712;GO:0005634;GO:0005634;GO:0006355;GO:0045892;GO:0001958;GO:0003712;GO:0003712;GO:0005634;GO:0005634;GO:0005634;GO:0006355;GO:0006355;GO:0006355;GO:0008134;GO:0008134;GO:0014037;GO:0042552;GO:0045682;GO:0045892;GO:0003712;GO:0005634;GO:0005634;GO:0006355;GO:0045892;	K22388	-	K	KOG3835;0DIWU;1913S;0UMJ0;1CTN7;1B3QX;12TS4;09WA2;0V78E	Ngfi-A binding protein 1 [Source:MGI Symbol;Acc:MGI:107564]	17936	Q61122
ENSMUSG00000052102	1990.51	3426.66	554.349	0.161775	-2.62794	4.61129e-38	1.08975e-36	18	38460588	38472056	-	4311	Gnpda1	GO:0004342;GO:0004342;GO:0005975;GO:0006044;GO:0004342;GO:0004342;GO:0005975;GO:0006044;GO:0004342;GO:0004342;GO:0004342;GO:0004342;GO:0005737;GO:0005737;GO:0005975;GO:0005975;GO:0006002;GO:0006041;GO:0006043;GO:0006043;GO:0006043;GO:0006044;GO:0006046;GO:0006048;GO:0006091;GO:0006091;GO:0007340;GO:0016787;GO:0019262;GO:0042802;GO:0046370;GO:0004342;GO:0006044;GO:0004342;GO:0004342;GO:0005975;GO:…	K02564	EC:3.5.99.6	G	1CVXB;0UISP;0DM2B;KOG3148;18XDD;0VAG3;1AWGP;09ZJ4;12P4Z	glucosamine-6-phosphate deaminase 1 [Source:MGI Symbol;Acc:MGI:1347054]	26384	O88958;Q3TKA0
ENSMUSG00000021483	249.96	456.889	43.0309	0.0941824	-3.4084	5.04253e-38	1.18978e-36	13	64580128	64589587	+	6775	Cdk20	GO:0000166;GO:0001843;GO:0004672;GO:0004674;GO:0004693;GO:0004693;GO:0005515;GO:0005524;GO:0005524;GO:0005634;GO:0005634;GO:0005654;GO:0005737;GO:0005929;GO:0006468;GO:0006468;GO:0006468;GO:0007049;GO:0007275;GO:0016301;GO:0016310;GO:0016740;GO:0021508;GO:0031076;GO:0042995;GO:0048706;GO:0051301;GO:0051726;GO:0060021;GO:0060045;GO:0061512;GO:0106311;GO:1901620;GO:1901621;GO:1903317;GO:1990403;GO:…	K08817	EC:2.7.11.22	D;K;L	0V4ME;0DHB0;09W1Y;1AW62;1CS13;0UJEC;12PN8;18S57;KOG0659	cyclin-dependent kinase 20 [Source:MGI Symbol;Acc:MGI:2145349]	105278	Q9JHU3
ENSMUSG00000022822	5881.79	3004.85	8758.74	2.91487	1.54343	5.5627e-38	1.31044e-36	16	20150053	20245144	-	10681	Abcc5	GO:0000166;GO:0005524;GO:0005524;GO:0005768;GO:0005794;GO:0005796;GO:0005886;GO:0005886;GO:0005886;GO:0008514;GO:0009925;GO:0010008;GO:0015216;GO:0015562;GO:0015562;GO:0015711;GO:0015865;GO:0016020;GO:0016020;GO:0016020;GO:0016020;GO:0016021;GO:0016021;GO:0016323;GO:0016323;GO:0016324;GO:0016324;GO:0016887;GO:0034634;GO:0034775;GO:0042626;GO:0042626;GO:0042908;GO:0042908;GO:0042910;GO:0042910;GO:…	K05668	-	Q	KOG0054;1CV0D;0UP3H;18U2M;0V5UG;1AZZB;0DH03;12PGU;09UMJ	ATP-binding cassette, sub-family C (CFTR/MRP), member 5 [Source:MGI Symbol;Acc:MGI:1351644]	27416	Q9R1X5
ENSMUSG00000075595	765.781	1246.43	285.136	0.228763	-2.12807	8.78e-38	2.0651e-36	11	95603499	95725941	+	15444	Zfp652	GO:0000785;GO:0000978;GO:0003677;GO:0003700;GO:0005634;GO:0006357;GO:0046872;GO:0000785;GO:0000978;GO:0003677;GO:0003700;GO:0005634;GO:0006357;GO:0046872;	-	-	K	18UQZ;0V4KE;0DGHT;1CR7H;0UK9W;KOG1721;1AVSA;09V9F;12TBM	zinc finger protein 652 [Source:MGI Symbol;Acc:MGI:2442221]	268469	Q5DU09
ENSMUSG00000074305	1446.35	2287.74	604.963	0.264437	-1.919	1.14751e-37	2.69474e-36	9	56108410	56325351	-	12351	Peak1	GO:0004672;GO:0005524;GO:0006468;GO:0004672;GO:0004672;GO:0004715;GO:0004715;GO:0004715;GO:0005737;GO:0005856;GO:0005925;GO:0005925;GO:0005925;GO:0005925;GO:0006468;GO:0006468;GO:0015629;GO:0015629;GO:0015629;GO:0015629;GO:0016477;GO:0016477;GO:0016477;GO:0018108;GO:0030054;GO:0034446;GO:0034446;GO:0034446;GO:0042802;GO:0042802;GO:0046777;GO:0046777;GO:0048041;GO:0048041;GO:0048041;GO:0051893;GO:…	K17538	EC:2.7.10.2	T;D	13KKA;0IJMD;1CQ2K;18YU4;09YSF;0V9QC;0DK71;0UN2M;1AYP2	pseudopodium-enriched atypical kinase 1 [Source:MGI Symbol;Acc:MGI:2442366]	244895	Q69Z38
ENSMUSG00000035929	714.869	118.318	1311.42	11.0838	3.47039	1.75328e-37	4.11082e-36	17	35598593	35604266	+	2596	H2-Q4	GO:0002476;GO:0005102;GO:0005615;GO:0005783;GO:0005794;GO:0005797;GO:0005886;GO:0009897;GO:0009986;GO:0016020;GO:0016021;GO:0030881;GO:0042277;GO:0042605;GO:0042608;GO:0042610;GO:0042612;GO:0042824;GO:0044877;GO:0046977;GO:0062061;GO:0070971;	K06751	-	U	09WNN;0US52;0VB3S;1CU56;0II5V;194CQ;13KER;0DJCZ;1AX68	histocompatibility 2, Q region locus 4 [Source:MGI Symbol;Acc:MGI:95933]	15015	Q8HWB2;Q0WXH7
ENSMUSG00000029178	1686.72	773.894	2599.55	3.35906	1.74806	2.26663e-37	5.29889e-36	5	64960731	64990244	+	11243	Klf3	GO:0000122;GO:0000785;GO:0000977;GO:0000978;GO:0000981;GO:0001227;GO:0003677;GO:0003677;GO:0005634;GO:0005654;GO:0005654;GO:0006357;GO:0046872;GO:1901653;GO:1990837;GO:1990837;GO:0000122;GO:0000785;GO:0000977;GO:0000978;GO:0000981;GO:0001227;GO:0003677;GO:0003677;GO:0005634;GO:0005654;GO:0006357;GO:0046872;GO:1990837;	K15605	-	K	0UQRQ;0DQFZ;13IJW;1B38N;1CZI1;0VDPG;18VXW;KOG1721;0A2TU	Kruppel-like factor 3 (basic) [Source:MGI Symbol;Acc:MGI:1342773]	16599	Q60980;Q545J5
ENSMUSG00000040528	1159.26	496.466	1822.04	3.67002	1.87579	2.2671e-37	5.29889e-36	11	106642052	106659620	+	2474	Milr1	GO:0004888;GO:0005515;GO:0005576;GO:0005886;GO:0005887;GO:0005887;GO:0007166;GO:0016020;GO:0016021;GO:0033004;GO:0033004;GO:0043303;GO:0043303;GO:0098742;GO:0033004;GO:0043303;GO:0004888;GO:0005515;GO:0005576;GO:0005886;GO:0005887;GO:0005887;GO:0007166;GO:0016020;GO:0016021;GO:0033004;GO:0033004;GO:0043303;GO:0043303;GO:0098742;GO:0004888;GO:0005515;GO:0005576;GO:0005886;GO:0005887;GO:0005887;GO:…	-	-	T	0A0DZ;1B5BM;0VBA6;0UR9F;0DN0S;1941G;0IGSD;13I24;1CWWX	mast cell immunoglobulin like receptor 1 [Source:MGI Symbol;Acc:MGI:2685731]	380732	Q3TB92
ENSMUSG00000059851	389.611	674.688	104.535	0.154938	-2.69023	2.80835e-37	6.55369e-36	7	4743114	4750513	+	4001	Kmt5c	GO:0000779;GO:0000792;GO:0003682;GO:0003682;GO:0005634;GO:0005634;GO:0005654;GO:0005694;GO:0005721;GO:0006281;GO:0006281;GO:0006325;GO:0008168;GO:0016571;GO:0016740;GO:0032259;GO:0034773;GO:0034773;GO:0034773;GO:0042393;GO:0042799;GO:0042799;GO:0042799;GO:0045830;GO:0046872;GO:1904047;GO:1904047;GO:2001034;GO:2001034;GO:0005634;GO:0005694;GO:0000779;GO:0000792;GO:0000792;GO:0003682;GO:0003682;GO:…	K11429	EC:2.1.1.362	B	0V8HX;09WCX;1CTP2;18ZE9;12QKP;0DIXK;0UHEM;1AS97;KOG2589	lysine methyltransferase 5C [Source:MGI Symbol;Acc:MGI:2385262]	232811	Q6Q783
ENSMUSG00000020261	1521.61	2358.5	684.716	0.290318	-1.78429	4.28139e-37	9.97565e-36	11	55095176	55127156	+	5626	Slc36a1	GO:0003333;GO:0005280;GO:0005280;GO:0005368;GO:0005368;GO:0005764;GO:0005764;GO:0005764;GO:0005765;GO:0005783;GO:0005783;GO:0005886;GO:0005886;GO:0005886;GO:0006865;GO:0015078;GO:0015078;GO:0015171;GO:0015175;GO:0015175;GO:0015180;GO:0015180;GO:0015187;GO:0015187;GO:0015193;GO:0015193;GO:0015293;GO:0015734;GO:0015734;GO:0015804;GO:0015804;GO:0015808;GO:0015808;GO:0015816;GO:0015816;GO:0015824;GO:…	K14209	-	P;E	KOG1304;12P1R;1CQGE;18TTT;09UH5;0V5GF;1ASWJ;0UGSB;0DFSZ	solute carrier family 36 (proton/amino acid symporter), member 1 [Source:MGI Symbol;Acc:MGI:2445299]	215335	Q8K4D3;Q5F227
ENSMUSG00000027368	1271.52	54.2929	2488.74	45.8391	5.51851	9.39936e-37	2.18663e-35	2	127178079	127180296	+	2003	Dusp2	GO:0000188;GO:0001706;GO:0004721;GO:0004721;GO:0004721;GO:0004722;GO:0004725;GO:0004725;GO:0005515;GO:0005634;GO:0005634;GO:0005654;GO:0005654;GO:0005737;GO:0006470;GO:0006470;GO:0006470;GO:0008138;GO:0008330;GO:0016311;GO:0016787;GO:0016791;GO:0017017;GO:0017017;GO:0031965;GO:0031965;GO:0035335;GO:0035970;GO:0051019;GO:0051019;GO:0106306;GO:0106307;	K04459	-	V	0UMGK;0DIUX;18SR9;0V8FG;09XHE;1CTK8;1AXH6;KOG1716;12QJ8	dual specificity phosphatase 2 [Source:MGI Symbol;Acc:MGI:101911]	13537	Q05922
ENSMUSG00000030921	5399.66	1051.81	9747.5	9.26735	3.21216	9.71357e-37	2.25621e-35	7	104058232	104114400	-	4111	Trim30a	GO:0000209;GO:0003677;GO:0005634;GO:0005654;GO:0005737;GO:0005737;GO:0005737;GO:0005829;GO:0008270;GO:0009617;GO:0010468;GO:0010508;GO:0016567;GO:0019901;GO:0032715;GO:0032720;GO:0032880;GO:0034122;GO:0042803;GO:0043123;GO:0045087;GO:0045732;GO:0046596;GO:0046598;GO:0046872;GO:0051092;GO:0051865;GO:0061630;GO:1900226;GO:2000378;	-	-	O;K	0B6AK;0WJ0G;13FYK;1DGAS;1BBGY;197FW;0E9FG;0ITFH;0V3TY	tripartite motif-containing 30A [Source:MGI Symbol;Acc:MGI:98178]	20128	P15533
ENSMUSG00000040723	1623.57	328.382	2918.76	8.88831	3.15191	1.03533e-36	2.40106e-35	1	165474085	165537326	-	10131	Rcsd1	GO:0003009;GO:0005575;GO:0051015;GO:0071474;GO:0003009;GO:0005575;GO:0051015;GO:0051015;GO:0071474;GO:0071474;	K18615	-	S;T	1CXEF;0IKAV;191HI;0DHBZ;0V7G3;0URUS;13P19;1AVX2;09TAM	RCSD domain containing 1 [Source:MGI Symbol;Acc:MGI:2676394]	226594	Q3UZA1
ENSMUSG00000030830	16796.3	4735.74	28856.9	6.09342	2.60725	1.08245e-36	2.50645e-35	7	126895432	126934310	+	6569	Itgal	GO:0007155;GO:0007155;GO:0007229;GO:0008305;GO:0016020;GO:0016021;GO:0046872;GO:0007155;GO:0007155;GO:0007229;GO:0008305;GO:0016020;GO:0016021;GO:0046872;GO:0002291;GO:0007155;GO:0007155;GO:0007157;GO:0007159;GO:0007160;GO:0007229;GO:0008305;GO:0009986;GO:0009986;GO:0016020;GO:0016021;GO:0030369;GO:0034687;GO:0035683;GO:0043113;GO:0044877;GO:0046872;GO:0050839;GO:0098609;GO:0001772;GO:0002291;GO:…	K05718	-	W	1DEZ3;0WGD6;0E7ZM;0B3Y5;0IPAP;13CAF	integrin alpha L [Source:MGI Symbol;Acc:MGI:96606]	16408	E9Q5M7
ENSMUSG00000054203	1028.16	4.80456	2051.52	426.994	8.73807	1.15555e-36	2.67157e-35	1	173839564	173859376	-	4177	Ifi205	GO:0000122;GO:0000978;GO:0001227;GO:0002218;GO:0002218;GO:0003690;GO:0003690;GO:0005634;GO:0005634;GO:0005654;GO:0005730;GO:0005730;GO:0005829;GO:0008134;GO:0009617;GO:0009617;GO:0032731;GO:0035458;GO:0035458;GO:0035458;GO:0042802;	-	-	K	1CTDT;0UM8D;0DINX;0J5NP;194Q0;1B2J8;1408X;0V89T;09XBF	interferon activated gene 205 [Source:MGI Symbol;Acc:MGI:101847]	226695	Q8CGE8
ENSMUSG00000040026	11347.4	61.9145	22632.9	365.551	8.51393	1.19426e-36	2.75678e-35	7	46361422	46365124	-	2606	Saa3	GO:0005576;GO:0005576;GO:0005615;GO:0006953;GO:0007252;GO:0009617;GO:0034364;GO:0035634;GO:0035662;GO:0042056;GO:0050918;GO:0060326;GO:0071347;	K17310	-	S	0UVED;1D3KC;1968W;0IXU4;1B5XD;0DUDX;0A7RM;13V05;0VIAJ	serum amyloid A 3 [Source:MGI Symbol;Acc:MGI:98223]	20210	P04918
ENSMUSG00000016529	117.179	7.33706	227.021	30.9416	4.95148	1.50235e-36	3.4626e-35	1	130947582	130952711	+	1310	Il10	GO:0001818;GO:0001818;GO:0001818;GO:0001819;GO:0001819;GO:0001938;GO:0002237;GO:0002237;GO:0002639;GO:0002639;GO:0002719;GO:0002719;GO:0002875;GO:0002904;GO:0002904;GO:0005125;GO:0005125;GO:0005125;GO:0005141;GO:0005141;GO:0005576;GO:0005576;GO:0005615;GO:0005615;GO:0005615;GO:0005615;GO:0006955;GO:0006955;GO:0006955;GO:0007165;GO:0007568;GO:0008285;GO:0010033;GO:0010468;GO:0010468;GO:0010507;GO:…	K05443	-	W	09TS6;1CPSD;0DF2K;1B58D;0V4RH;13TP3;0UG7D;0IYFW;192YB	interleukin 10 [Source:MGI Symbol;Acc:MGI:96537]	16153	P18893;Q3U879
ENSMUSG00000029616	1710.89	2629.39	792.397	0.301362	-1.73043	1.68978e-36	3.88857e-35	5	121566653	121590569	-	9060	Erp29	GO:0005783;GO:0000187;GO:0000187;GO:0001934;GO:0001934;GO:0005783;GO:0005783;GO:0005783;GO:0005783;GO:0005783;GO:0005788;GO:0005788;GO:0005790;GO:0005790;GO:0006888;GO:0009306;GO:0009986;GO:0009986;GO:0010628;GO:0010628;GO:0010629;GO:0010629;GO:0030133;GO:0030133;GO:0042470;GO:0042803;GO:0042803;GO:0050709;GO:0050709;GO:0051087;GO:0051087;GO:1902235;GO:0005783;GO:0005783;	K09586	-	O;U	0IX2F;0VAWZ;12RVA;1B0JQ;18Y82;0UQSU;0A00A;0DMJY;1CWF8	endoplasmic reticulum protein 29 [Source:MGI Symbol;Acc:MGI:1914647]	67397	P57759
ENSMUSG00000028497	875.564	1402.15	348.981	0.248891	-2.00642	1.99254e-36	4.57824e-35	4	88314381	88357165	-	6756	Hacd4	GO:0005783;GO:0005783;GO:0005789;GO:0006629;GO:0006631;GO:0006633;GO:0016020;GO:0016021;GO:0016829;GO:0018812;GO:0019899;GO:0030497;GO:0042761;GO:0102158;GO:0102343;GO:0102344;GO:0102345;GO:0005783;GO:0005789;GO:0006629;GO:0006631;GO:0006633;GO:0016020;GO:0016021;GO:0016829;GO:0102158;GO:0102343;GO:0102344;GO:0102345;GO:0005783;GO:0005783;GO:0005789;GO:0006629;GO:0006631;GO:0006633;GO:0016020;GO:…	K10703	EC:4.2.1.134	S;U	KOG3187;1B46A;18Z79;0UP64;0DRZE;0VDTT;12Q49;0A3EM;1D189	3-hydroxyacyl-CoA dehydratase 4 [Source:MGI Symbol;Acc:MGI:1914025]	66775	A2AKM2
ENSMUSG00000041132	388.552	670.438	106.667	0.1591	-2.65199	2.05802e-36	4.72142e-35	5	150495109	150520653	-	3813	N4bp2l1	GO:0003674;GO:0005575;GO:0008150;GO:0003674;GO:0005575;GO:0008150;	-	-	L	12S79;18YGI;09UJJ;KOG2401;0UTM3;1AZYY;0V5IR;0DQRD;1CZUQ	NEDD4 binding protein 2-like 1 [Source:MGI Symbol;Acc:MGI:2140872]	100637	Q3V2Q8
ENSMUSG00000040297	1641.13	762.955	2519.31	3.30205	1.72336	2.08678e-36	4.78004e-35	1	161643683	161704251	-	8928	Suco	GO:0001503;GO:0003674;GO:0005737;GO:0005783;GO:0005791;GO:0007275;GO:0016020;GO:0016020;GO:0016021;GO:0030867;GO:0032967;GO:0045669;GO:0046850;GO:0046850;	-	-	S;O;T;I	09TYP;0VAB2;12SYH;0DMQJ;1CWK4;1B0FV;0UPVD;18ZYQ;KOG1396	SUN domain containing ossification factor [Source:MGI Symbol;Acc:MGI:2138346]	226551	-
ENSMUSG00000023055	667.497	1092.49	242.506	0.221976	-2.17153	2.26126e-36	5.17176e-35	15	102615212	102630613	-	5731	Calcoco1	GO:0000785;GO:0000785;GO:0000976;GO:0000976;GO:0000978;GO:0000978;GO:0000978;GO:0003682;GO:0003712;GO:0003712;GO:0003713;GO:0003713;GO:0003713;GO:0003713;GO:0003713;GO:0005515;GO:0005515;GO:0005515;GO:0005634;GO:0005634;GO:0005634;GO:0005634;GO:0005737;GO:0005829;GO:0005829;GO:0007165;GO:0008013;GO:0008013;GO:0008022;GO:0008022;GO:0010628;GO:0010628;GO:0016055;GO:0030374;GO:0030374;GO:0030518;GO:…	-	-	K	0V5ZN;09UZW;0DG9B;18UAT;1ATIJ;1CQWS;0IHKH;0UHYY;13J3Y	calcium binding and coiled coil domain 1 [Source:MGI Symbol;Acc:MGI:1914738]	67488	Q8CGU1
ENSMUSG00000024778	134.916	12.1725	257.66	21.1675	4.40378	2.29459e-36	5.23995e-35	19	34268066	34305172	+	2062	Fas	GO:0001934;GO:0002020;GO:0004888;GO:0005031;GO:0005031;GO:0005515;GO:0005515;GO:0005515;GO:0005516;GO:0005516;GO:0005576;GO:0005615;GO:0005737;GO:0005829;GO:0005886;GO:0005886;GO:0006915;GO:0006915;GO:0006915;GO:0006924;GO:0006924;GO:0006925;GO:0006955;GO:0007165;GO:0007623;GO:0008625;GO:0008625;GO:0009636;GO:0009897;GO:0009897;GO:0009986;GO:0010467;GO:0010468;GO:0010626;GO:0010942;GO:0016020;GO:…	K04390	-	T	1CTQE;09XME;1B0GF;0J23A;0DIYZ;0V8J4;13V7I;0UMMC;192Y5	Fas (TNF receptor superfamily member 6) [Source:MGI Symbol;Acc:MGI:95484]	14102	P25446
ENSMUSG00000020818	1468.4	2274.47	662.332	0.291203	-1.7799	2.5024e-36	5.70578e-35	11	116743266	116766461	+	7076	Mfsd11	GO:0016020;GO:0016021;GO:0016020;GO:0016021;GO:0003674;GO:0005575;GO:0008150;GO:0016020;GO:0016021;GO:0016020;GO:0016021;GO:0016020;GO:0016021;GO:0003674;GO:0005575;GO:0008150;GO:0016020;GO:0016021;	-	-	S;B;U	KOG3098;1B3HE;12N7K;09TFM;18T4F;0DPPG;0UT0D;0V4EQ;1CYND	major facilitator superfamily domain containing 11 [Source:MGI Symbol;Acc:MGI:1917150]	69900	Q8BJ51
ENSMUSG00000032803	3506.98	1770.38	5243.58	2.96184	1.5665	2.68214e-36	6.10627e-35	9	103230293	103243039	-	7403	Cdv3	GO:0003674;GO:0005737;GO:0005737;GO:0005737;GO:0005829;GO:0005829;GO:0005886;GO:0005886;GO:0008150;GO:0003674;GO:0005737;GO:0005737;GO:0005737;GO:0005829;GO:0005886;GO:0008150;	-	-	S	09ZAE;13J44;193TS;1AWAW;1CVMJ;0IJ3A;0DKSS;0VA7S;0UPU0	carnitine deficiency-associated gene expressed in ventricle 3 [Source:MGI Symbol;Acc:MGI:2448759]	321022	Q4VAA2
ENSMUSG00000020091	1935.38	2954.49	916.266	0.310126	-1.68907	3.47601e-36	7.90157e-35	10	61264270	61288440	-	5784	Eif4ebp2	GO:0005515;GO:0005737;GO:0006417;GO:0006446;GO:0007613;GO:0008190;GO:0008190;GO:0008190;GO:0008286;GO:0017148;GO:0019933;GO:0030371;GO:0031929;GO:0035176;GO:0045947;GO:0045947;GO:0045947;GO:0048167;GO:0050804;GO:0098794;GO:0098794;GO:0005515;GO:0005737;GO:0006417;GO:0006446;GO:0007613;GO:0008190;GO:0008190;GO:0008190;GO:0008286;GO:0017148;GO:0019933;GO:0030371;GO:0031929;GO:0035176;GO:0045947;GO:…	K18644	-	J	0J2Z0;1932T;13WGN;1B5H9;0UUZF;0A6NE;0VIV1;0DTN3;1D2ZN	eukaryotic translation initiation factor 4E binding protein 2 [Source:MGI Symbol;Acc:MGI:109198]	13688	P70445;Q3UFP6
ENSMUSG00000094724	139.16	13.4918	264.827	19.6287	4.29489	4.14084e-36	9.3985e-35	17	7238033	7278698	+	4455	Rnaset2b	GO:0003723;GO:0033897;GO:0090502;GO:0002376;GO:0003723;GO:0004518;GO:0004519;GO:0004521;GO:0004540;GO:0005576;GO:0005576;GO:0005615;GO:0005739;GO:0005758;GO:0005764;GO:0005764;GO:0005783;GO:0005788;GO:0005788;GO:0006401;GO:0016020;GO:0016021;GO:0016787;GO:0016829;GO:0033897;GO:0033897;GO:0043202;GO:0045087;GO:0090305;GO:0090501;GO:0090502;GO:0002376;GO:0003723;GO:0004518;GO:0004519;GO:0004521;GO:…	K01166	EC:4.6.1.19	A	1CZ0P;KOG1642;0DQ0B;12SY4;1B3PG;18XUU;0UTAR;0A442;0VEYU	ribonuclease T2B [Source:MGI Symbol;Acc:MGI:3702087]	68195	C0HKG5;C0HKG6;Q5FWA0
ENSMUSG00000031903	2380.7	4085.25	676.151	0.16551	-2.59501	4.29118e-36	9.72493e-35	8	106877031	106891347	+	3013	Pla2g15	GO:0006629;GO:0008374;GO:0004623;GO:0004806;GO:0005576;GO:0005615;GO:0005615;GO:0005615;GO:0005615;GO:0005615;GO:0005654;GO:0005654;GO:0005739;GO:0005764;GO:0005764;GO:0005764;GO:0006629;GO:0006629;GO:0006629;GO:0006631;GO:0006650;GO:0006650;GO:0006650;GO:0006651;GO:0006658;GO:0006658;GO:0006672;GO:0006672;GO:0006672;GO:0006672;GO:0008270;GO:0008270;GO:0008374;GO:0008374;GO:0008374;GO:0008374;GO:…	K06129	EC:3.1.1.5	I	1AU89;18V9D;0V6IX;12S4B;09VJS;KOG2369;0DGU9;0UIQZ;1CRIE	phospholipase A2, group XV [Source:MGI Symbol;Acc:MGI:2178076]	192654	Q8VEB4
ENSMUSG00000036402	3959.2	2026.45	5891.96	2.90753	1.5398	5.1271e-36	1.16017e-34	6	66873381	66998334	+	4727	Gng12	GO:0005834;GO:0005834;GO:0005884;GO:0005886;GO:0007165;GO:0007186;GO:0007186;GO:0016020;GO:0030165;GO:0031680;GO:0031681;GO:0031681;GO:0042301;GO:0005834;GO:0005834;GO:0005884;GO:0005886;GO:0007165;GO:0007186;GO:0007186;GO:0016020;GO:0030165;GO:0031680;GO:0031681;GO:0031681;GO:0042301;GO:0005834;GO:0005834;GO:0005884;GO:0005886;GO:0007165;GO:0007186;GO:0007186;GO:0016020;GO:0030165;GO:0031680;GO:…	K04347	-	T	0DVJW;193XA;1D4WC;13U9E;KOG4119;1B6Q5;0UWFE;0A9DD;0VKAC	guanine nucleotide binding protein (G protein), gamma 12 [Source:MGI Symbol;Acc:MGI:1336171]	14701	Q9DAS9
ENSMUSG00000030447	6712.9	3529.19	9896.6	2.80421	1.4876	5.34677e-36	1.20805e-34	7	55491493	55582350	+	11941	Cyfip1	GO:0000340;GO:0000340;GO:0000340;GO:0000902;GO:0001726;GO:0003779;GO:0005515;GO:0005515;GO:0005522;GO:0005737;GO:0005737;GO:0005737;GO:0005845;GO:0006417;GO:0006417;GO:0007275;GO:0007399;GO:0007411;GO:0008360;GO:0010592;GO:0016601;GO:0016601;GO:0030027;GO:0030027;GO:0030031;GO:0030032;GO:0030032;GO:0030054;GO:0030154;GO:0030833;GO:0031175;GO:0031209;GO:0031209;GO:0031209;GO:0031267;GO:0031267;GO:…	K05749	-	Z;S;K	0UK5M;194GU;0DHVC;1CSJZ;1AVTR;12QSQ;0V74E;09WJZ;KOG3534	cytoplasmic FMR1 interacting protein 1 [Source:MGI Symbol;Acc:MGI:1338801]	20430	Q7TMB8
ENSMUSG00000078429	1464.74	2263.98	665.511	0.293956	-1.76633	5.79521e-36	1.30738e-34	10	126814586	126835844	+	5524	Ctdsp2	GO:0001933;GO:0004721;GO:0004721;GO:0004722;GO:0005575;GO:0005634;GO:0006470;GO:0006470;GO:0008420;GO:0008420;GO:0008420;GO:0008420;GO:0016787;GO:0016791;GO:0046872;GO:0106306;GO:0106307;GO:2000134;GO:0016311;GO:0016791;	K15731	EC:3.1.3.16	K	0DEFC;0UFD1;KOG1605;09V0Z;12Z69;1ARAB;18S09;1CP51;0V42X	CTD (carboxy-terminal domain, RNA polymerase II, polypeptide A) small phosphatase 2 [Source:MGI Symbol;Acc:MGI:1098748]	52468	Q8BX07
ENSMUSG00000029430	3595.23	1830.08	5360.38	2.92904	1.55043	7.70039e-36	1.73457e-34	5	129097133	129101387	+	2646	Ran	GO:0000054;GO:0000055;GO:0000056;GO:0000070;GO:0000070;GO:0000166;GO:0000287;GO:0000287;GO:0000785;GO:0001673;GO:0002177;GO:0003924;GO:0003924;GO:0003924;GO:0003924;GO:0005515;GO:0005515;GO:0005515;GO:0005525;GO:0005525;GO:0005525;GO:0005634;GO:0005634;GO:0005634;GO:0005635;GO:0005635;GO:0005643;GO:0005654;GO:0005730;GO:0005737;GO:0005737;GO:0005737;GO:0005814;GO:0005829;GO:0006606;GO:0006606;GO:…	K07936	-	U	1CRZ4;0V6YH;KOG0096;12NEU;09W02;0UKGR;1B4TS;194W0;0DH94	RAN, member RAS oncogene family [Source:MGI Symbol;Acc:MGI:1333112]	19384	P62827
ENSMUSG00000032841	548.392	192.857	903.927	4.68703	2.22867	7.9612e-36	1.79061e-34	2	101544630	101713372	-	4967	Prr5l	GO:0001933;GO:0001933;GO:0001934;GO:0005739;GO:0009968;GO:0010762;GO:0010762;GO:0014068;GO:0031625;GO:0031932;GO:0031932;GO:0031932;GO:0034599;GO:0034599;GO:0038203;GO:0038203;GO:0038203;GO:0061014;GO:0061014;GO:0090316;GO:0090316;GO:0001933;GO:0001933;GO:0001933;GO:0001934;GO:0005739;GO:0009968;GO:0010762;GO:0010762;GO:0010762;GO:0014068;GO:0031625;GO:0031625;GO:0031932;GO:0031932;GO:0031932;GO:…	-	-	S	0UU6S;0IJB2;13HIX;0VFAS;1D17S;18U0S;0A4FX;0DRYW;1AZZM	proline rich 5 like [Source:MGI Symbol;Acc:MGI:1919696]	72446	A2AVJ5
ENSMUSG00000046079	2023.04	973.817	3072.26	3.15486	1.65758	8.15316e-36	1.83102e-34	5	105847835	105980302	+	12573	Lrrc8d	GO:0005225;GO:0005225;GO:0005737;GO:0005737;GO:0005783;GO:0005789;GO:0005886;GO:0005886;GO:0005887;GO:0005887;GO:0006811;GO:0015698;GO:0015734;GO:0015734;GO:0015810;GO:0015810;GO:0016020;GO:0016021;GO:0034702;GO:0034702;GO:0071470;GO:0071470;GO:0098656;GO:0098656;GO:0005225;GO:0005225;GO:0005225;GO:0005737;GO:0005737;GO:0005737;GO:0005783;GO:0005789;GO:0005886;GO:0005886;GO:0005886;GO:0005887;GO:…	K22038	-	T	KOG0619;18V2E;09W9X;1CS9F;12PT8;0DHJ7;1ARNP;0UU91;0V789	leucine rich repeat containing 8D [Source:MGI Symbol;Acc:MGI:1922368]	231549	Q8BGR2
ENSMUSG00000000732	2120.62	42.5934	4198.66	98.5754	6.62316	8.34704e-36	1.87174e-34	10	77905136	77919747	+	4620	Icosl	GO:0001817;GO:0002250;GO:0002376;GO:0005102;GO:0005102;GO:0005515;GO:0005886;GO:0005886;GO:0005887;GO:0007165;GO:0009897;GO:0009897;GO:0016020;GO:0016021;GO:0032753;GO:0036464;GO:0042104;GO:0042110;GO:0042113;GO:0042802;GO:0045190;GO:0050852;GO:0016020;GO:0016021;	K06710	-	T	0DPDJ;0VF7M;13SIB;0IYI6;0A4CT;193D1;1B2XG;1CYBG;0USRG	icos ligand [Source:MGI Symbol;Acc:MGI:1354701]	50723	Q9JHJ8;Q544C7
ENSMUSG00000021846	315.503	555.728	75.2779	0.135458	-2.88408	1.00834e-35	2.25771e-34	14	48358280	48519032	+	9089	Peli2	GO:0000209;GO:0001934;GO:0008063;GO:0008592;GO:0016567;GO:0016740;GO:0043410;GO:0061630;GO:0061630;GO:0000209;GO:0008592;GO:0061630;GO:0000209;GO:0008592;GO:0061630;	K11964	EC:2.3.2.27	O;T	1AUB5;18WPF;0DNAJ;KOG3842;0VBJD;1CX7H;12TB1;0A0P6;0UIUF	pellino 2 [Source:MGI Symbol;Acc:MGI:1891445]	93834	Q8BST6;E9QPQ6
ENSMUSG00000025464	261.82	497.354	26.2867	0.0528532	-4.24187	1.03364e-35	2.31089e-34	7	139695712	139717137	+	4907	Paox	GO:0016491;GO:0055114;GO:0005737;GO:0005777;GO:0005782;GO:0005782;GO:0006598;GO:0006598;GO:0008215;GO:0009446;GO:0009447;GO:0009447;GO:0016491;GO:0016491;GO:0016491;GO:0046203;GO:0046203;GO:0046208;GO:0046208;GO:0046592;GO:0046592;GO:0046592;GO:0052899;GO:0052901;GO:0052902;GO:0052903;GO:0052904;GO:0055114;GO:0055114;GO:1901307;GO:0016491;GO:0055114;	K00308	EC:1.5.3.13	H	0VC92;09TDI;1B0E8;1CXYT;0DP10;KOG0685;1950F;0UQNE;12TN7	polyamine oxidase (exo-N4-amino) [Source:MGI Symbol;Acc:MGI:1916983]	212503	Q8C0L6
ENSMUSG00000026207	1308.57	2032.26	584.88	0.287797	-1.79687	1.2637e-35	2.821e-34	1	75351941	75408964	+	12741	Speg	GO:0000166;GO:0004672;GO:0004674;GO:0005524;GO:0005524;GO:0005634;GO:0006468;GO:0042692;GO:0004674;GO:0005524;GO:0006468;GO:0000166;GO:0001701;GO:0004672;GO:0004672;GO:0004674;GO:0004674;GO:0005524;GO:0005524;GO:0005634;GO:0005634;GO:0006468;GO:0016301;GO:0016310;GO:0016740;GO:0030154;GO:0042692;GO:0055013;GO:0060541;GO:0072359;GO:0106310;GO:0106311;GO:0004674;GO:0005524;GO:0006468;GO:0000166;GO:…	K08809	EC:2.7.11.1	Z;T	0URT2;KOG0613;18YMI;12NP0;09UCG;0DPBY;KOG0032;1CUZK;1B4VA;0V474	SPEG complex locus [Source:MGI Symbol;Acc:MGI:109282]	11790	Q62407
ENSMUSG00000040451	1989.11	620.155	3358.07	5.4149	2.43693	1.47509e-35	3.28798e-34	19	32100127	32367114	-	10546	Sgms1	GO:0000138;GO:0000139;GO:0002950;GO:0005634;GO:0005783;GO:0005794;GO:0005886;GO:0005887;GO:0006629;GO:0006665;GO:0006686;GO:0006686;GO:0006686;GO:0006915;GO:0006954;GO:0010628;GO:0016020;GO:0016021;GO:0016301;GO:0016310;GO:0016740;GO:0030173;GO:0030173;GO:0030173;GO:0030176;GO:0033188;GO:0033188;GO:0033188;GO:0033188;GO:0046513;GO:0046513;GO:0047493;GO:0047493;GO:0047493;GO:2001237;GO:0000138;GO:…	K04714	EC:2.7.8.27	I;G	0UQRH;0V51K;1B389;18ZW2;12NHQ;KOG3058;0DFEG;09U2M;1CY5E	sphingomyelin synthase 1 [Source:MGI Symbol;Acc:MGI:2444110]	208449	Q8VCQ6
[truncated: 14,243 more rows]
