# Supplementary material for: Transcriptomics and quantitative proteomics reveal changes after second stimulation of bone marrow-derived macrophages from lupus-prone MRL/lpr mice
Source: Front Immunol. 2022 Oct 19;13:1004232. doi: 10.3389/fimmu.2022.1004232 (PMC9627492; doi:10.3389/fimmu.2022.1004232)
Supplement: Supplementary file 2 [file Table_2.xlsx]

## Sheet: Sheet1
id	baseMean	baseMean_A	baseMean_C	foldChange(C/A)(C/A)	log2FoldChange	pval	padj	Chromosome	Start Site	End Site	Direction	Length	Name	GO	KEGG	EC	eggNOG Class	eggNOG	Description	Entrez_geneID	UniProtAC
ENSMUSG00000024401	64401.1	148.131	128654	868.513	9.7624	0	0	17	35418357	35420983	-	1639	Tnf	GO:0000122;GO:0000122;GO:0000122;GO:0000165;GO:0000165;GO:0000185;GO:0000185;GO:0000187;GO:0000187;GO:0000976;GO:0000976;GO:0001774;GO:0001774;GO:0001775;GO:0001819;GO:0001819;GO:0001891;GO:0001932;GO:0001934;GO:0001934;GO:0001934;GO:0001937;GO:0002020;GO:0002020;GO:0002020;GO:0002037;GO:0002269;GO:0002439;GO:0002439;GO:0002637;GO:0002719;GO:0002719;GO:0002876;GO:0002925;GO:0003085;GO:0005125;GO:…	K03156	-	T;V	0ISAN;18UT2;1CPFN;0UFSN;13NCV;0V4DY;1B3M4;0DERX;09TEV	tumor necrosis factor [Source:MGI Symbol;Acc:MGI:104798]	21926	P06804;Q3U593
ENSMUSG00000029379	15372.8	10.9114	30734.7	2816.75	11.4598	0	0	5	90933962	90937459	+	3498	Cxcl3	GO:0005125;GO:0005515;GO:0005576;GO:0005576;GO:0005615;GO:0005615;GO:0005615;GO:0005615;GO:0006935;GO:0006935;GO:0006952;GO:0006954;GO:0006954;GO:0006954;GO:0006954;GO:0006955;GO:0007204;GO:0007204;GO:0008009;GO:0008009;GO:0008009;GO:0008009;GO:0008009;GO:0030593;GO:0030593;GO:0030593;GO:0030593;GO:0032496;GO:0045236;GO:0061844;GO:0070098;GO:0071222;GO:0071222;	K05505	-	S;W	0DVJX;1D4WZ;0J3WE;1B6Q4;0VKBQ;13XHT;0A9A4;0UWC6	chemokine (C-X-C motif) ligand 3 [Source:MGI Symbol;Acc:MGI:3037818]	330122	Q6W5C0
ENSMUSG00000029380	52005.9	33.8109	103978	3075.29	11.5865	1.37668e-284	6.86689e-281	5	91039100	91040974	+	1875	Cxcl1	GO:0002237;GO:0002526;GO:0005125;GO:0005576;GO:0005576;GO:0005615;GO:0005615;GO:0005615;GO:0005615;GO:0006935;GO:0006935;GO:0006952;GO:0006954;GO:0006954;GO:0006955;GO:0007165;GO:0007204;GO:0008009;GO:0008009;GO:0008009;GO:0008083;GO:0010765;GO:0030593;GO:0030593;GO:0031640;GO:0032930;GO:0043268;GO:0045236;GO:0060326;GO:0061844;GO:0061844;GO:0070098;GO:0070965;GO:0071222;GO:1902035;	K05505	-	S;W	0DVJX;1D4WZ;19409;0J3WE;1B6Q4;0VKBQ;13XHT;0A9A4;0UWC6	chemokine (C-X-C motif) ligand 1 [Source:MGI Symbol;Acc:MGI:108068]	14825	P12850;A2RTH0
ENSMUSG00000027399	12542	44.2308	25039.8	566.116	9.14495	3.20489e-269	1.19895e-265	2	129141530	129151892	-	1974	Il1a	GO:0001660;GO:0001819;GO:0001819;GO:0002248;GO:0005125;GO:0005125;GO:0005125;GO:0005125;GO:0005149;GO:0005149;GO:0005507;GO:0005507;GO:0005507;GO:0005576;GO:0005576;GO:0005615;GO:0005615;GO:0005615;GO:0005615;GO:0005615;GO:0005737;GO:0005829;GO:0005829;GO:0005829;GO:0005886;GO:0006883;GO:0006954;GO:0006954;GO:0006954;GO:0006955;GO:0008285;GO:0008285;GO:0009986;GO:0010575;GO:0010628;GO:0010628;GO:…	K04383	-	W;T	1AWYQ;0UFPI;0JAAI;0DHQC;142BS;192YM;0V7DF;09WEY;1CSEP	interleukin 1 alpha [Source:MGI Symbol;Acc:MGI:96542]	16175	P01582;Q3U0Y6
ENSMUSG00000050578	22565.4	289.084	44841.8	155.117	7.27721	7.78867e-246	2.33099e-242	9	7272514	7283331	+	2673	Mmp13	GO:0001958;GO:0001968;GO:0003417;GO:0004175;GO:0004222;GO:0004222;GO:0004222;GO:0005509;GO:0005509;GO:0005518;GO:0005518;GO:0005576;GO:0005576;GO:0005576;GO:0005615;GO:0005764;GO:0005794;GO:0006508;GO:0006508;GO:0006508;GO:0007507;GO:0008233;GO:0008233;GO:0008237;GO:0008237;GO:0008270;GO:0008270;GO:0008270;GO:0009725;GO:0016787;GO:0022617;GO:0022617;GO:0030198;GO:0030282;GO:0030282;GO:0030574;GO:…	K07994	EC:3.4.24.-	O;W	0DGSQ;KOG1565;0V6HA;1AUFS;09U0I;0UIYP;13GUN;18ZRE;1CRGU	matrix metallopeptidase 13 [Source:MGI Symbol;Acc:MGI:1340026]	17386	P33435;Q3U9V5
ENSMUSG00000000982	31131.6	192.945	62070.3	321.699	8.32957	7.84297e-191	1.95604e-187	11	83538670	83540181	-	766	Ccl3	GO:0000165;GO:0001649;GO:0001775;GO:0002548;GO:0002548;GO:0004672;GO:0004698;GO:0005125;GO:0005515;GO:0005515;GO:0005576;GO:0005576;GO:0005615;GO:0005615;GO:0005615;GO:0005737;GO:0005829;GO:0006468;GO:0006816;GO:0006874;GO:0006887;GO:0006935;GO:0006954;GO:0006954;GO:0006954;GO:0006955;GO:0007010;GO:0007165;GO:0007186;GO:0007204;GO:0007204;GO:0007267;GO:0008009;GO:0008009;GO:0008009;GO:0008009;GO:…	K05408	-	T	196EQ;0UWD3;0DVHK;146RM;1D4YW;1B6KP;0J4I9;0A9HK;0VKER	chemokine (C-C motif) ligand 3 [Source:MGI Symbol;Acc:MGI:98260]	20302	P10855;Q5QNW0
ENSMUSG00000037405	18026.3	541.402	35511.2	65.5912	6.03543	9.24902e-190	1.97718e-186	9	20927281	20940113	+	4360	Icam1	GO:0001772;GO:0002291;GO:0002291;GO:0002438;GO:0002457;GO:0002693;GO:0002693;GO:0005178;GO:0005178;GO:0005178;GO:0005615;GO:0005615;GO:0005886;GO:0005887;GO:0007155;GO:0007155;GO:0007155;GO:0007155;GO:0007159;GO:0007159;GO:0007605;GO:0008360;GO:0009897;GO:0009986;GO:0016020;GO:0016020;GO:0016021;GO:0022614;GO:0030838;GO:0033627;GO:0043547;GO:0044406;GO:0044406;GO:0044877;GO:0045121;GO:0045429;GO:…	K06490	-	T;W	1B090;13NCQ;0IPHM;0DMAY;1CR6B;0UIWP;09W69;195US;0VAP3	intercellular adhesion molecule 1 [Source:MGI Symbol;Acc:MGI:96392]	15894	P13597;Q3U8M7
ENSMUSG00000027737	16852.2	552.458	33151.9	60.0081	5.90709	5.3161e-184	9.94377e-181	3	49846975	50398063	-	13922	Slc7a11	GO:0006865;GO:0006865;GO:0016020;GO:0016020;GO:0016021;GO:0016021;GO:0022857;GO:0055085;GO:0005791;GO:0005791;GO:0005856;GO:0005856;GO:0005886;GO:0005886;GO:0006749;GO:0006865;GO:0006865;GO:0006979;GO:0007420;GO:0007420;GO:0008542;GO:0009636;GO:0009636;GO:0009986;GO:0009986;GO:0014070;GO:0015179;GO:0016020;GO:0016020;GO:0016020;GO:0016021;GO:0016021;GO:0021591;GO:0021756;GO:0022857;GO:0030534;GO:…	K13869	-	E	12P2T;1CT91;09V1W;190VU;1AWIK;0V61J;0UM2S;0DIIE;KOG1287	solute carrier family 7 (cationic amino acid transporter, y+ system), member 11 [Source:MGI Symbol;Acc:MGI:1347355]	26570	Q9WTR6;Q542C8
ENSMUSG00000000732	2484.16	43.283	4925.03	113.787	6.83019	2.46807e-183	4.10358e-180	10	77905136	77919747	+	4620	Icosl	GO:0001817;GO:0002250;GO:0002376;GO:0005102;GO:0005102;GO:0005515;GO:0005886;GO:0005886;GO:0005887;GO:0007165;GO:0009897;GO:0009897;GO:0016020;GO:0016021;GO:0032753;GO:0036464;GO:0042104;GO:0042110;GO:0042113;GO:0042802;GO:0045190;GO:0050852;GO:0016020;GO:0016021;	K06710	-	T	0DPDJ;0VF7M;13SIB;0IYI6;0A4CT;193D1;1B2XG;1CYBG;0USRG	icos ligand [Source:MGI Symbol;Acc:MGI:1354701]	50723	Q9JHJ8;Q544C7
ENSMUSG00000004296	4603.7	2.34564	9205.06	3924.33	11.9382	5.62282e-178	8.41399e-175	11	44290890	44304860	+	1967	Il12b	GO:0001916;GO:0002230;GO:0002230;GO:0002323;GO:0002827;GO:0002827;GO:0002860;GO:0002862;GO:0004896;GO:0004896;GO:0004896;GO:0005125;GO:0005125;GO:0005126;GO:0005515;GO:0005576;GO:0005576;GO:0005615;GO:0005615;GO:0005737;GO:0005788;GO:0005796;GO:0007050;GO:0007166;GO:0008083;GO:0008283;GO:0009897;GO:0009986;GO:0010033;GO:0010224;GO:0010536;GO:0016020;GO:0016477;GO:0019221;GO:0019221;GO:0019233;GO:…	K05425	-	T	18U6Z;1CZQE;12TC0;09XR2;0DRCT;0VF5R;0IF5K;1AW8A;0UKRV	interleukin 12b [Source:MGI Symbol;Acc:MGI:96540]	16160	P43432;Q3ZAX5
ENSMUSG00000045664	1595	26.5097	3163.49	119.333	6.89885	7.4203e-167	1.00943e-163	19	5965664	5974844	-	3411	Cdc42ep2	GO:0001515;GO:0005096;GO:0005096;GO:0005737;GO:0005737;GO:0005737;GO:0005737;GO:0005829;GO:0005829;GO:0005856;GO:0005856;GO:0005886;GO:0005886;GO:0005886;GO:0007266;GO:0008360;GO:0008360;GO:0008360;GO:0008360;GO:0012505;GO:0015630;GO:0015630;GO:0016020;GO:0016020;GO:0016020;GO:0030036;GO:0030036;GO:0030838;GO:0030838;GO:0030838;GO:0031267;GO:0031267;GO:0031267;GO:0031274;GO:0031274;GO:0031274;GO:…	-	-	Z;T	0A27G;0VD3D;0IZS0;13TCJ;0UIG6;1B2CA;1CYV4;0DPVK;19509	CDC42 effector protein (Rho GTPase binding) 2 [Source:MGI Symbol;Acc:MGI:1929744]	104252	Q8JZX9
ENSMUSG00000034422	36694.2	1734.63	71653.9	41.3079	5.36834	7.7519e-163	9.66662e-160	16	35653244	35691914	-	9306	Parp14	GO:0002376;GO:0003714;GO:0003950;GO:0003950;GO:0003950;GO:0003950;GO:0005515;GO:0005515;GO:0005634;GO:0005634;GO:0005737;GO:0005737;GO:0005737;GO:0005737;GO:0005829;GO:0005829;GO:0005886;GO:0005886;GO:0006471;GO:0006471;GO:0010629;GO:0010629;GO:0010629;GO:0016740;GO:0016757;GO:0019899;GO:0019899;GO:0042531;GO:0042531;GO:0042532;GO:0042532;GO:0045087;GO:0045892;GO:0060336;GO:0060336;GO:0060336;GO:…	K15261	EC:2.4.2.30	K;B	1AWYB;KOG2633;09Z6H;0UPNT;19113;12QR3;0VA3U;1CPQR;0DKND	poly (ADP-ribose) polymerase family, member 14 [Source:MGI Symbol;Acc:MGI:1919489]	547253	Q2EMV9
ENSMUSG00000055994	1922.8	46.8997	3798.7	80.9963	6.33978	1.1732e-160	1.35045e-157	8	89373943	89415102	+	5014	Nod2	GO:0005515;GO:0005737;GO:0006259;GO:0016888;GO:0032495;GO:0032731;GO:0042981;GO:0000166;GO:0002221;GO:0002221;GO:0002227;GO:0002253;GO:0002367;GO:0002376;GO:0002606;GO:0002710;GO:0002732;GO:0002732;GO:0002830;GO:0002830;GO:0002830;GO:0002862;GO:0002925;GO:0003779;GO:0003779;GO:0005515;GO:0005524;GO:0005737;GO:0005737;GO:0005737;GO:0005737;GO:0005737;GO:0005794;GO:0005794;GO:0005829;GO:0005829;GO:…	K10165	-	T;I	1CVNP;0UKPP;12SQR;0DKTS;KOG4308;0VA8J;18TGR;1B0TD;09ZBD	nucleotide-binding oligomerization domain containing 2 [Source:MGI Symbol;Acc:MGI:2429397]	257632	Q80SY9
ENSMUSG00000035164	5930.03	259.75	11600.3	44.6594	5.48089	6.88494e-157	7.35902e-154	9	52022644	52079872	-	6845	Zc3h12c	GO:0003729;GO:0004518;GO:0004519;GO:0004521;GO:0005634;GO:0016787;GO:0036464;GO:0046872;GO:0046872;GO:0090502;GO:0004518;GO:0004519;GO:0016787;GO:0046872;GO:0046872;GO:0090305;	K18668	EC:3.1.-.-	A;S;K	0UKS4;0DGMG;12RNG;KOG3777;09VCG;0V6BM;1CTUQ;1B0NC;18U9J	zinc finger CCCH type containing 12C [Source:MGI Symbol;Acc:MGI:3026959]	244871	Q5DTV4;E9Q1I3
ENSMUSG00000105504	12942.5	3.77836	25881.2	6849.84	12.7419	4.85409e-155	4.84244e-152	3	142199739	142228105	+	6637	Gbp5	GO:0000139;GO:0000166;GO:0002376;GO:0003924;GO:0003924;GO:0005515;GO:0005525;GO:0005525;GO:0005525;GO:0005737;GO:0005737;GO:0005794;GO:0005794;GO:0006954;GO:0009617;GO:0016020;GO:0016787;GO:0031410;GO:0031410;GO:0032611;GO:0032621;GO:0034067;GO:0042802;GO:0042803;GO:0045089;GO:0048471;GO:0051289;GO:0051289;GO:0071346;GO:0071346;GO:1900017;GO:1900227;GO:1900227;GO:0003924;GO:0005525;GO:0005794;GO:…	K20898	-	S;K	0V5RR;0DG1U;09US8;18XUQ;1ASMB;KOG2037;1CQRC;0UHMY;13NFW	guanylate binding protein 5 [Source:MGI Symbol;Acc:MGI:2429943]	229898	Q8CFB4;Q8BMN7
ENSMUSG00000027580	24499.8	1316.02	47683.5	36.2331	5.17923	3.215e-153	3.00683e-150	2	180869408	180883820	-	11529	Helz2	GO:0000166;GO:0000184;GO:0003677;GO:0003723;GO:0003723;GO:0003724;GO:0004386;GO:0004386;GO:0004540;GO:0005524;GO:0005634;GO:0005654;GO:0005737;GO:0016787;GO:0030374;GO:0030374;GO:0045944;GO:0046872;GO:0090501;GO:0003723;GO:0004386;GO:0004540;GO:0005634;GO:0030374;GO:0030374;GO:0045893;GO:0045944;GO:0090501;GO:0003723;GO:0004386;GO:0004540;GO:0005634;GO:0030374;GO:0045893;GO:0090501;	-	-	A;J;K	12N6M;KOG1804;18VCR;1CPF2;KOG2102;0UFRU;0V4D9;1B371;0DER9;09TE5	helicase with zinc finger 2, transcriptional coactivator [Source:MGI Symbol;Acc:MGI:2385169]	229003	E9QAM5;Q3TZD5
ENSMUSG00000039735	9077.88	478.284	17677.5	36.9602	5.2079	1.83576e-149	1.61591e-146	3	122332368	122413364	-	12376	Fnbp1l	GO:0005886;GO:0005938;GO:0006897;GO:0007165;GO:0016020;GO:0005737;GO:0005856;GO:0005886;GO:0006897;GO:0006897;GO:0006914;GO:0007165;GO:0016020;GO:0005737;GO:0005856;GO:0005886;GO:0006897;GO:0006897;GO:0006914;GO:0007165;GO:0016020;GO:0005737;GO:0005856;GO:0005886;GO:0006897;GO:0006897;GO:0006914;GO:0007165;GO:0016020;	K20121	-	Z	0WG1G;13BRZ;0INNW;0E7SQ;1DESI;1972S;0B3MK;1BASG;0V2UB	formin binding protein 1-like [Source:MGI Symbol;Acc:MGI:1925642]	214459	E9PUI5
ENSMUSG00000000957	16888.6	940.305	32836.8	34.9215	5.12604	2.60157e-149	2.16277e-146	14	54669069	54682821	+	5960	Mmp14	GO:0001501;GO:0001503;GO:0001503;GO:0001525;GO:0001541;GO:0001666;GO:0001935;GO:0001958;GO:0004175;GO:0004175;GO:0004222;GO:0004222;GO:0004222;GO:0004222;GO:0005178;GO:0005178;GO:0005615;GO:0005615;GO:0005634;GO:0005634;GO:0005737;GO:0005737;GO:0005737;GO:0005737;GO:0005829;GO:0005829;GO:0005886;GO:0005886;GO:0006508;GO:0006508;GO:0006508;GO:0006508;GO:0006979;GO:0008233;GO:0008237;GO:0008237;GO:…	K07763	EC:3.4.24.80	O;W	KOG1565;0UJH4;09TSQ;0DEJD;0V4S1;18S8U;12PPA;1AZDX;1CS33	matrix metallopeptidase 14 (membrane-inserted) [Source:MGI Symbol;Acc:MGI:101900]	17387	P53690
ENSMUSG00000032688	19374.1	854.036	37894.2	44.3707	5.47154	1.53578e-145	1.20955e-142	18	65564009	65612138	+	18040	Malt1	GO:0001650;GO:0001650;GO:0001923;GO:0002020;GO:0002096;GO:0002726;GO:0002726;GO:0004197;GO:0004842;GO:0004842;GO:0005515;GO:0005634;GO:0005634;GO:0005634;GO:0005737;GO:0005737;GO:0005737;GO:0005829;GO:0005829;GO:0005829;GO:0005829;GO:0006508;GO:0006508;GO:0006508;GO:0006508;GO:0006915;GO:0007249;GO:0007250;GO:0007250;GO:0008233;GO:0008233;GO:0008233;GO:0009620;GO:0016567;GO:0016787;GO:0019209;GO:…	K07369	EC:3.4.22.-	T;K	13JDV;09WF9;18X9Y;1AY41;0DHQM;0UJYV;0IG3U;0V7DU;1CSEY	MALT1 paracaspase [Source:MGI Symbol;Acc:MGI:2445027]	240354	Q2TBA3
ENSMUSG00000028634	3638.39	205.034	7071.74	34.4906	5.10813	9.23332e-136	6.90837e-133	4	119590981	119995242	+	17627	Hivep3	GO:0000978;GO:0000981;GO:0003677;GO:0005634;GO:0005634;GO:0005634;GO:0005737;GO:0005829;GO:0006357;GO:0035914;GO:0045893;GO:0045893;GO:0046872;GO:0000978;GO:0000981;GO:0003677;GO:0005634;GO:0005634;GO:0005634;GO:0005737;GO:0005829;GO:0006357;GO:0035914;GO:0045893;GO:0046872;	K09239	-	K	09WFV;0V7ED;0UJZX;KOG1721;1CSFQ;0DHRC;13FBN;192BT;1AZDT	human immunodeficiency virus type I enhancer binding protein 3 [Source:MGI Symbol;Acc:MGI:106589]	16656	A2A884
ENSMUSG00000069874	4211.36	157.444	8265.28	52.4966	5.71415	6.38863e-132	4.55235e-129	11	58090444	58113608	+	3690	Irgm2	GO:0000045;GO:0000139;GO:0001934;GO:0003924;GO:0003924;GO:0005525;GO:0005739;GO:0005789;GO:0005794;GO:0005794;GO:0005829;GO:0006952;GO:0009617;GO:0010508;GO:0010800;GO:0016020;GO:0019901;GO:0020003;GO:0031648;GO:0033138;GO:0034341;GO:0035458;GO:0042742;GO:0042742;GO:0042832;GO:0043254;GO:0043539;GO:0045087;GO:0050700;GO:0050821;GO:0050829;GO:0051434;GO:0060335;GO:0061635;GO:0061739;GO:0061762;GO:…	K14139	EC:3.6.5.-	-	-	immunity-related GTPase family M member 2 [Source:MGI Symbol;Acc:MGI:1926262]	54396	Q9Z1M2
ENSMUSG00000017652	16334.1	19.9663	32648.2	1635.16	10.6752	1.74822e-131	1.18911e-128	2	164897547	164914868	+	3406	Cd40	GO:0001934;GO:0001934;GO:0002376;GO:0002637;GO:0002637;GO:0002768;GO:0002768;GO:0003823;GO:0003823;GO:0003823;GO:0005515;GO:0005515;GO:0005576;GO:0005615;GO:0005615;GO:0005737;GO:0005737;GO:0005886;GO:0005886;GO:0006874;GO:0006874;GO:0006874;GO:0006954;GO:0006954;GO:0006954;GO:0009617;GO:0009897;GO:0009897;GO:0009897;GO:0009986;GO:0009986;GO:0016020;GO:0016021;GO:0019899;GO:0019899;GO:0019904;GO:…	K03160	-	T	0VFS7;0A15X;19164;1D0E0;0IY0H;1B166;13SA9;0US0P;0DSBB	CD40 antigen [Source:MGI Symbol;Acc:MGI:88336]	21939	P27512
ENSMUSG00000027995	10561.1	750.178	20372	27.1562	4.76321	3.10925e-131	2.02291e-128	3	83743579	83749074	-	3014	Tlr2	GO:0001530;GO:0001540;GO:0001666;GO:0001774;GO:0001775;GO:0002224;GO:0002224;GO:0002237;GO:0002376;GO:0002755;GO:0004888;GO:0005737;GO:0005794;GO:0005886;GO:0005887;GO:0006691;GO:0006954;GO:0006954;GO:0006954;GO:0006955;GO:0007165;GO:0007252;GO:0008285;GO:0009636;GO:0009986;GO:0009986;GO:0010628;GO:0016020;GO:0016021;GO:0016021;GO:0030177;GO:0030670;GO:0031226;GO:0031410;GO:0032289;GO:0032493;GO:…	K10159	-	T	0DII2;1ARAQ;12R4X;09U4Y;0V85A;0UM2G;1CT8N;KOG4641;191N5	toll-like receptor 2 [Source:MGI Symbol;Acc:MGI:1346060]	24088	Q9QUN7;G3X8Y8
ENSMUSG00000026463	1693.15	56.7672	3329.54	58.6526	5.87412	8.58133e-131	5.35046e-128	1	133627195	133728779	-	12248	Atp2b4	GO:0000166;GO:0000166;GO:0003407;GO:0005388;GO:0005388;GO:0005388;GO:0005388;GO:0005388;GO:0005388;GO:0005515;GO:0005516;GO:0005516;GO:0005516;GO:0005524;GO:0005524;GO:0005886;GO:0005886;GO:0005886;GO:0005887;GO:0005887;GO:0005929;GO:0006357;GO:0006357;GO:0006811;GO:0006816;GO:0006816;GO:0006816;GO:0006874;GO:0006874;GO:0006874;GO:0006874;GO:0007283;GO:0010629;GO:0010629;GO:0010629;GO:0010751;GO:…	K05850	EC:7.2.2.10	P	0DJY0;18ZBC;12P5I;1B2BV;09YFF;1CURI;KOG0204;0V9D9;0US9G	ATPase, Ca++ transporting, plasma membrane 4 [Source:MGI Symbol;Acc:MGI:88111]	381290	Q6Q477;Q3UPA8;D1FNM9
ENSMUSG00000018899	5588.87	409.959	10767.8	26.2655	4.7151	2.36817e-125	1.41749e-122	11	53660841	53669200	+	3975	Irf1	GO:0000785;GO:0000785;GO:0000976;GO:0000976;GO:0000976;GO:0000976;GO:0000978;GO:0000978;GO:0000978;GO:0000981;GO:0000981;GO:0001228;GO:0001228;GO:0002376;GO:0002376;GO:0002819;GO:0003677;GO:0003677;GO:0003700;GO:0003700;GO:0005515;GO:0005515;GO:0005515;GO:0005515;GO:0005634;GO:0005634;GO:0005634;GO:0005737;GO:0006355;GO:0006357;GO:0006915;GO:0006915;GO:0006915;GO:0006915;GO:0007050;GO:0007050;GO:…	K09444	-	K	1925D;1AX39;13CX1;0IER3;0DIYB;1CTPS;0UM2B;0VF97;0A4EA	interferon regulatory factor 1 [Source:MGI Symbol;Acc:MGI:96590]	16362	P15314;Q5SX13
ENSMUSG00000026031	18869.5	1549.25	36189.8	23.3596	4.54594	9.51661e-125	5.47717e-122	1	58750667	58798043	+	12669	Cflar	GO:0001666;GO:0002020;GO:0002020;GO:0004197;GO:0005123;GO:0005737;GO:0006508;GO:0006915;GO:0008047;GO:0008234;GO:0010667;GO:0010976;GO:0031264;GO:0031264;GO:0031265;GO:0032869;GO:0033574;GO:0042981;GO:0043066;GO:0043123;GO:0044877;GO:0045121;GO:0060544;GO:0070374;GO:0071364;GO:0071392;GO:0071456;GO:0071549;GO:0071732;GO:0072126;GO:0097342;GO:1902042;GO:1903055;GO:1903427;GO:1903845;GO:1903944;GO:…	K04724	-	D	1AS4Y;0VANN;18WP8;0DMAB;13HU3;1CW5I;09ZS9;0UQFM;KOG3573	CASP8 and FADD-like apoptosis regulator [Source:MGI Symbol;Acc:MGI:1336166]	12633	O35732;Q812G4
ENSMUSG00000055202	1199.28	25.8283	2372.74	91.8659	6.52146	6.53766e-122	3.62332e-119	17	33014650	33028905	-	3555	Zfp811	GO:0000977;GO:0000981;GO:0005634;GO:0006355;GO:0006357;GO:0046872;GO:0000977;GO:0000981;GO:0005634;GO:0006355;GO:0006357;GO:0046872;GO:0000977;GO:0000981;GO:0005634;GO:0006355;GO:0006357;	K09228	-	K	KOG1721	zinc finger protein 811 [Source:MGI Symbol;Acc:MGI:2682944]	240063	A0A3Q4EGT7
ENSMUSG00000020134	8081.12	660.562	15501.7	23.4674	4.55259	1.17164e-121	6.2616e-119	11	21041291	21100323	+	6553	Peli1	GO:0000209;GO:0000209;GO:0000209;GO:0000778;GO:0001819;GO:0004842;GO:0005515;GO:0005515;GO:0005634;GO:0008063;GO:0008063;GO:0008592;GO:0016567;GO:0016740;GO:0030890;GO:0031398;GO:0032088;GO:0032496;GO:0034141;GO:0034145;GO:0042130;GO:0043123;GO:0043161;GO:0043161;GO:0043331;GO:0050868;GO:0050871;GO:0060546;GO:0060546;GO:0061630;GO:0061630;GO:0061630;GO:0061630;GO:0070534;GO:0070534;GO:0070936;GO:…	K11964	EC:2.3.2.27	T	0DNAJ;KOG3842;0VBJD;1CX7H;12TB1;1B2V7;18YWZ;0A0P6;0UIUF	pellino 1 [Source:MGI Symbol;Acc:MGI:1914495]	67245	Q8C669;Q5SRW7
ENSMUSG00000009376	3143.9	227.708	6060.1	26.6134	4.73408	7.46995e-120	3.85449e-117	6	17463799	17573979	+	7679	Met	GO:0000166;GO:0001886;GO:0004672;GO:0004713;GO:0004713;GO:0004714;GO:0004714;GO:0005524;GO:0005524;GO:0006468;GO:0007169;GO:0009925;GO:0016020;GO:0016021;GO:0016021;GO:0017154;GO:0018108;GO:0019903;GO:0031116;GO:0035024;GO:0042802;GO:0045944;GO:0048754;GO:0050918;GO:0051497;GO:0061436;GO:0070495;GO:0071526;GO:0071526;GO:1901299;GO:1905098;GO:2001028;GO:0017154;GO:0071526;GO:0000166;GO:0004672;GO:…	K05099	EC:2.7.10.1	T	0E8CA;1BB15;KOG1095;0V36G;13D6S;0B4IB;1977Z;1DFAU;KOG3610;0WH1X	met proto-oncogene [Source:MGI Symbol;Acc:MGI:96969]	17295	F8VQL0;A4FUV6
ENSMUSG00000074622	3845.03	7385.48	304.58	0.0412403	-4.5998	2.14771e-115	1.07128e-112	2	160205623	160208985	-	3363	Mafb	GO:0000978;GO:0000978;GO:0000981;GO:0000981;GO:0000981;GO:0001228;GO:0003677;GO:0003677;GO:0003677;GO:0003700;GO:0005515;GO:0005515;GO:0005634;GO:0005634;GO:0005634;GO:0005634;GO:0005634;GO:0005654;GO:0005667;GO:0006355;GO:0006355;GO:0006355;GO:0006357;GO:0006357;GO:0007379;GO:0007585;GO:0008134;GO:0008134;GO:0021571;GO:0021572;GO:0021599;GO:0033077;GO:0035284;GO:0042472;GO:0042802;GO:0042802;GO:…	K09036	-	K	1B179;0DM6M;0VAJN;0URB0;1950H;KOG4196;13UZ2;09ZNW;1CW1U	v-maf musculoaponeurotic fibrosarcoma oncogene family, protein B (avian) [Source:MGI Symbol;Acc:MGI:104555]	16658	P54841
ENSMUSG00000029915	3914.88	324.483	7505.28	23.13	4.53169	2.91928e-114	1.40916e-111	6	40551828	40562755	-	3840	Clec5a	GO:0001618;GO:0001618;GO:0001618;GO:0001819;GO:0002076;GO:0002376;GO:0005515;GO:0005515;GO:0005829;GO:0005886;GO:0005886;GO:0009986;GO:0016020;GO:0016021;GO:0030099;GO:0030246;GO:0033033;GO:0043066;GO:0045087;GO:0045087;GO:0045087;GO:0046718;GO:0001618;GO:0001618;GO:0001618;GO:0001819;GO:0002076;GO:0002376;GO:0005515;GO:0005515;GO:0005829;GO:0005886;GO:0005886;GO:0009986;GO:0016020;GO:0016021;GO:…	K10073	-	T;V	0VCNG;1933D;13V5K;0USSP;0A1SS;1CYD3;0DPF0;KOG4297;1AS6W	C-type lectin domain family 5, member a [Source:MGI Symbol;Acc:MGI:1345151]	23845	Q9R007
ENSMUSG00000045382	3061.32	5885.68	236.958	0.0402601	-4.6345	4.37268e-113	2.04478e-110	1	128515936	128520030	-	1808	Cxcr4	GO:0001666;GO:0001764;GO:0002064;GO:0003779;GO:0004930;GO:0004930;GO:0004950;GO:0005634;GO:0005737;GO:0005764;GO:0005764;GO:0005768;GO:0005768;GO:0005769;GO:0005769;GO:0005770;GO:0005770;GO:0005886;GO:0005886;GO:0005886;GO:0006935;GO:0007165;GO:0007186;GO:0007186;GO:0007186;GO:0008038;GO:0009986;GO:0014823;GO:0016020;GO:0016021;GO:0016021;GO:0016477;GO:0019722;GO:0019955;GO:0019957;GO:0022008;GO:…	K04189	-	T	KOG3656;09XJW;194AW;0V8HU;12PRP;1B2JP;1CTP0;0DIXH;0UIY4	chemokine (C-X-C motif) receptor 4 [Source:MGI Symbol;Acc:MGI:109563]	12767	P70658;A0A0R4J0N8
ENSMUSG00000028163	16748	1665.17	31830.7	19.1156	4.25668	3.37411e-112	1.53e-109	3	135290416	135397308	-	12061	Nfkb1	GO:0000122;GO:0000122;GO:0000122;GO:0000785;GO:0000976;GO:0000976;GO:0000976;GO:0000977;GO:0000977;GO:0000978;GO:0000978;GO:0000978;GO:0000981;GO:0001225;GO:0001227;GO:0001227;GO:0001228;GO:0001228;GO:0001818;GO:0003677;GO:0003677;GO:0003677;GO:0003682;GO:0003690;GO:0003700;GO:0003700;GO:0003700;GO:0003700;GO:0005515;GO:0005515;GO:0005634;GO:0005634;GO:0005634;GO:0005634;GO:0005654;GO:0005654;GO:…	K02580	-	K;E	0UGN0;0VD3P;KOG0504;0A3C4;1AWWW;1CTIN;0DITA;18SWP;13GBI	nuclear factor of kappa light polypeptide gene enhancer in B cells 1, p105 [Source:MGI Symbol;Acc:MGI:97312]	18033	P25799
ENSMUSG00000024772	15946	366.949	31525	85.9112	6.42477	9.77465e-112	4.302e-109	19	6326755	6350126	+	3705	Ehd1	GO:0000166;GO:0005509;GO:0005515;GO:0005524;GO:0005525;GO:0005768;GO:0005768;GO:0005769;GO:0005769;GO:0005811;GO:0005886;GO:0005886;GO:0005886;GO:0005929;GO:0006886;GO:0006886;GO:0006897;GO:0006897;GO:0010008;GO:0010008;GO:0010008;GO:0010886;GO:0010976;GO:0010976;GO:0015031;GO:0016020;GO:0016197;GO:0016197;GO:0020018;GO:0020018;GO:0030030;GO:0030139;GO:0030139;GO:0031095;GO:0031175;GO:0031175;GO:…	K12483	-	T;U	0V6UU;1CTEH;0USGH;1B57K;09XC5;12N3T;1923G;KOG1954;0DIPJ	EH-domain containing 1 [Source:MGI Symbol;Acc:MGI:1341878]	13660	Q9WVK4;Q80ZZ0
ENSMUSG00000056498	963.091	1892.54	33.637	0.0177734	-5.81413	6.84404e-111	2.92612e-108	3	84573499	84611882	+	4738	Tmem154	GO:0003674;GO:0005575;GO:0008150;GO:0016020;GO:0016021;	-	-	S	1D3P0;13Y8N;0A82B;0UVU8;0DUF4;0J2D6;0VIBN;193JD;1B6AD	transmembrane protein 154 [Source:MGI Symbol;Acc:MGI:2444725]	320782	Q8C4Q9
ENSMUSG00000098557	14155.2	1437.14	26873.2	18.6991	4.2249	1.54432e-110	6.41922e-108	14	103214017	103220073	-	6057	Kctd12	GO:0042802;GO:0051260;	K21918	-	-	-	potassium channel tetramerisation domain containing 12 [Source:MGI Symbol;Acc:MGI:2145823]	239217	Q6WVG3;A0A0R4J2B2;Q8C2V2;Q69ZA6
ENSMUSG00000037580	4070.82	365.758	7775.88	21.2596	4.41004	2.70609e-110	1.09443e-107	14	47391352	47426870	-	6251	Gch1	GO:0000166;GO:0003824;GO:0003924;GO:0003924;GO:0003934;GO:0003934;GO:0003934;GO:0003934;GO:0003934;GO:0003934;GO:0005509;GO:0005509;GO:0005525;GO:0005525;GO:0005525;GO:0005525;GO:0005525;GO:0005634;GO:0005634;GO:0005634;GO:0005654;GO:0005654;GO:0005737;GO:0005737;GO:0005737;GO:0005737;GO:0005829;GO:0005829;GO:0006729;GO:0006729;GO:0006729;GO:0006729;GO:0008152;GO:0008217;GO:0008217;GO:0008270;GO:…	K01495	EC:3.5.4.16	H	1CTUV;18VF5;KOG2698;1AUDU;0V7I8;13HKT;0DJ34;0UKZG;09WJK	GTP cyclohydrolase 1 [Source:MGI Symbol;Acc:MGI:95675]	14528	Q05915;Q3U7P6
ENSMUSG00000038068	1320.28	2572.09	68.4805	0.0266245	-5.2311	3.27773e-110	1.29074e-107	13	47276132	47401467	+	4936	Rnf144b	GO:0000151;GO:0000209;GO:0004842;GO:0004842;GO:0004842;GO:0005737;GO:0005737;GO:0005737;GO:0005737;GO:0005739;GO:0006511;GO:0006511;GO:0006511;GO:0006915;GO:0016020;GO:0016021;GO:0016567;GO:0016567;GO:0016740;GO:0031624;GO:0031966;GO:0031966;GO:0031966;GO:0031966;GO:0032436;GO:0043066;GO:0043066;GO:0043066;GO:0046872;GO:0061630;GO:0000151;GO:0000209;GO:0004842;GO:0004842;GO:0005737;GO:0005737;GO:…	K11975	EC:2.3.2.31	O	09X8A;12SXA;0URGI;0DN6D;KOG1815;18SF1;0V4D8;1CYJD;1ARPD	ring finger protein 144B [Source:MGI Symbol;Acc:MGI:2384986]	218215	Q8BKD6
ENSMUSG00000073555	499.432	7.19854	991.665	137.759	7.106	3.69363e-110	1.41722e-107	18	60345152	60380892	+	2645	Gm4951	GO:0003924;GO:0005525;GO:0005789;GO:0006952;GO:0016020;GO:0035458;GO:0035458;	-	-	S	0J4GH;13YGS	predicted gene 4951 [Source:MGI Symbol;Acc:MGI:3644953]	240327	Q3UED7
ENSMUSG00000033857	619.011	1230.13	7.89292	0.00641633	-7.28404	5.44004e-108	2.03512e-105	11	118367655	118380035	+	5184	Engase	GO:0004553;GO:0005737;GO:0005737;GO:0005829;GO:0006517;GO:0006517;GO:0008152;GO:0016787;GO:0016798;GO:0033925;GO:0033925;GO:0004553;GO:0005737;GO:0005737;GO:0005829;GO:0006517;GO:0006517;GO:0008152;GO:0016787;GO:0016798;GO:0033925;GO:0033925;GO:0033925;GO:0004553;GO:0005737;GO:0005737;GO:0005829;GO:0006517;GO:0006517;GO:0008152;GO:0016787;GO:0016798;GO:0033925;GO:0033925;GO:0033925;	K01227	EC:3.2.1.96	P;G	KOG2331;0DK4G;1AWT3;18YHA;12SG4;0V9MR;09YPZ;0UN1R;1CUY8	endo-beta-N-acetylglucosaminidase [Source:MGI Symbol;Acc:MGI:2443788]	217364	Q8BX80
ENSMUSG00000070327	48407.7	2702.83	94112.6	34.82	5.12185	3.97984e-106	1.45254e-103	11	119283926	119378244	+	16888	Rnf213	GO:0004842;GO:0016567;GO:0016887;GO:0046872;GO:0001525;GO:0001525;GO:0002040;GO:0002040;GO:0002040;GO:0004842;GO:0004842;GO:0004842;GO:0004842;GO:0005730;GO:0005730;GO:0005730;GO:0005737;GO:0005737;GO:0005829;GO:0005829;GO:0005829;GO:0005829;GO:0006511;GO:0006511;GO:0006511;GO:0016567;GO:0016567;GO:0016740;GO:0016787;GO:0016887;GO:0016887;GO:0016887;GO:0046872;GO:0051260;GO:0051260;GO:0051865;GO:…	K22754	EC:2.3.2.27	O;L	0A36T;0UI1D;0VCRZ;13JN5;190CU;0IHNB;0DFN7;1CQBS;1ATKY	ring finger protein 213 [Source:MGI Symbol;Acc:MGI:1289196]	672511	-
ENSMUSG00000039747	5475.36	558.272	10392.4	18.6154	4.21842	2.54988e-105	9.08484e-103	5	136176313	136199567	-	6077	Orai2	GO:0002115;GO:0015279;GO:0016020;GO:0016020;GO:0016020;GO:0016021;GO:0030426;GO:0070588;GO:0016020;GO:0016021;GO:0030426;GO:0016020;GO:0016021;	K16057	-	A	0UFQ2;0DHD6;1AZSD;09W46;0V72H;18VJQ;KOG4298;12RK3;1CS3F	ORAI calcium release-activated calcium modulator 2 [Source:MGI Symbol;Acc:MGI:2443195]	269717	Q8BH10;Q14BR6
ENSMUSG00000025429	2706.64	245.085	5168.2	21.0874	4.39831	6.29263e-105	2.18984e-102	18	77877614	77970579	+	2340	Pstpip2	GO:0003779;GO:0007010;GO:0016477;GO:0003779;GO:0003779;GO:0005515;GO:0005737;GO:0005737;GO:0005829;GO:0005856;GO:0005856;GO:0005884;GO:0005886;GO:0007010;GO:0007010;GO:0008092;GO:0016020;GO:0016477;GO:0030041;GO:0051015;	K20124	-	Z	0B6PJ;197I6;0IU8M;0E9PV;1BBME;0V3ZQ;13GJF;0WJEX;1DGIF	proline-serine-threonine phosphatase-interacting protein 2 [Source:MGI Symbol;Acc:MGI:1335088]	19201	Q99M15
ENSMUSG00000010307	1186.95	2308.03	65.8807	0.0285441	-5.13066	2.66029e-104	9.04742e-102	7	46700349	46704525	+	1887	Tmem86a	GO:0016020;GO:0016021;GO:0016021;GO:0047408;GO:0047409;	-	-	S;J	0A03G;KOG4804;191EZ;1CXMT;13HYY;0DNQF;0VBYT;0UU8W;1B01N	transmembrane protein 86A [Source:MGI Symbol;Acc:MGI:1915143]	67893	Q9D8N3
ENSMUSG00000016528	23919.6	2147.87	45691.4	21.2729	4.41094	2.5824e-103	8.58733e-101	1	130981437	131025563	-	3041	Mapkapk2	GO:0000166;GO:0002224;GO:0002224;GO:0004672;GO:0004674;GO:0004674;GO:0004674;GO:0004683;GO:0005515;GO:0005515;GO:0005516;GO:0005524;GO:0005524;GO:0005634;GO:0005634;GO:0005634;GO:0005634;GO:0005654;GO:0005654;GO:0005737;GO:0005737;GO:0005737;GO:0005737;GO:0005813;GO:0005813;GO:0006468;GO:0006468;GO:0006954;GO:0006954;GO:0006974;GO:0006974;GO:0006974;GO:0009931;GO:0016301;GO:0016310;GO:0016740;GO:…	K04443	EC:2.7.11.1	T	18VKH;1CUI6;0UNIH;12PZ5;KOG0604;0DJR3;1B31G;09YBC;0V7I5	MAP kinase-activated protein kinase 2 [Source:MGI Symbol;Acc:MGI:109298]	17164	P49138;Q3U2P8
ENSMUSG00000018930	11713.7	76.1831	23351.3	306.515	8.25981	4.85531e-103	1.57945e-100	11	83553410	83555509	+	660	Ccl4	GO:0002548;GO:0005125;GO:0005515;GO:0005576;GO:0005576;GO:0005615;GO:0005615;GO:0005615;GO:0006935;GO:0006954;GO:0006954;GO:0006954;GO:0006955;GO:0007165;GO:0007186;GO:0008009;GO:0008009;GO:0008009;GO:0009636;GO:0030593;GO:0030595;GO:0031726;GO:0031730;GO:0032760;GO:0035690;GO:0042802;GO:0043117;GO:0043547;GO:0043922;GO:0048020;GO:0048245;GO:0048247;GO:0050850;GO:0051928;GO:0060326;GO:0070098;GO:…	K12964	-	W;T	13X8V;1B6HY;0UVZK;196B4;1D4A0;0DUZ9;0J4I9;0A8E2;0VJA1	chemokine (C-C motif) ligand 4 [Source:MGI Symbol;Acc:MGI:98261]	20303	P14097;Q5QNV9
ENSMUSG00000027646	2318.47	220.049	4416.89	20.0723	4.32713	1.40814e-100	4.48327e-98	2	157260364	157313782	+	4371	Src	GO:0000166;GO:0004672;GO:0004713;GO:0004713;GO:0004715;GO:0005524;GO:0005524;GO:0006468;GO:0016301;GO:0016310;GO:0016740;GO:0018108;GO:0000166;GO:0004672;GO:0004713;GO:0004713;GO:0004715;GO:0005524;GO:0005524;GO:0006468;GO:0016301;GO:0016310;GO:0016740;GO:0018108;GO:0000166;GO:0001545;GO:0001545;GO:0001819;GO:0002102;GO:0002376;GO:0004672;GO:0004672;GO:0004672;GO:0004713;GO:0004713;GO:0004713;GO:…	K05704	EC:2.7.10.2	T	09UFI;1CY0J;1B2R2;12R0Y;KOG0197;0UMIY;0DMK2;18X31;0V649	Rous sarcoma oncogene [Source:MGI Symbol;Acc:MGI:98397]	20779	P05480
ENSMUSG00000035356	17825.1	211.994	35438.1	167.165	7.38513	8.33113e-100	2.59723e-97	16	55631738	55659262	-	5018	Nfkbiz	GO:0005515;GO:0005634;GO:0005634;GO:0005634;GO:0006954;GO:0010468;GO:0016607;GO:0036464;GO:0050729;GO:0050852;GO:2000321;GO:0005515;GO:0005634;GO:0005634;GO:0005634;GO:0006954;GO:0010468;GO:0016607;GO:0016607;GO:0036464;GO:0036464;GO:0050729;GO:0050729;GO:0050852;GO:2000321;GO:0005515;GO:0005634;GO:0005634;GO:0005634;GO:0006954;GO:0010468;GO:0016607;GO:0036464;GO:0050729;GO:0050852;GO:2000321;GO:…	K14242	-	K;E	0DKBA;KOG0504;1CV54;18W3F;1AZBI;13JN0;09YW3;0V9TX;0UP8E	nuclear factor of kappa light polypeptide gene enhancer in B cells inhibitor, zeta [Source:MGI Symbol;Acc:MGI:1931595]	80859	Q9EST8
ENSMUSG00000071637	2029.91	189.877	3869.95	20.3813	4.34918	9.04756e-99	2.76301e-96	16	15705150	15708895	+	3746	Cebpd	GO:0000785;GO:0000976;GO:0000978;GO:0000978;GO:0000978;GO:0000978;GO:0000981;GO:0001228;GO:0001228;GO:0001228;GO:0002244;GO:0003677;GO:0003677;GO:0003700;GO:0005515;GO:0005515;GO:0005634;GO:0005634;GO:0005634;GO:0005654;GO:0005654;GO:0006355;GO:0006357;GO:0006357;GO:0042802;GO:0043565;GO:0043565;GO:0045444;GO:0045595;GO:0045669;GO:0045892;GO:0045944;GO:0045944;GO:0045944;GO:0048839;GO:1990837;	K10050	-	-	-	CCAAT/enhancer binding protein (C/EBP), delta [Source:MGI Symbol;Acc:MGI:103573]	12609	Q00322;B9EIA9;Q3UE64
ENSMUSG00000027035	15301.9	1913.77	28690	14.9913	3.90605	1.21569e-97	3.63833e-95	2	68691785	68944626	+	8875	Cers6	GO:0003677;GO:0005515;GO:0005783;GO:0005783;GO:0005783;GO:0005789;GO:0006629;GO:0006665;GO:0006954;GO:0016020;GO:0016021;GO:0016021;GO:0016410;GO:0016740;GO:0030148;GO:0046513;GO:0046513;GO:0046513;GO:0050291;GO:0050291;GO:0050291;GO:0003677;GO:0003677;GO:0005634;GO:0005783;GO:0005789;GO:0006629;GO:0006665;GO:0016020;GO:0016021;GO:0016021;GO:0016740;GO:0046513;GO:0050291;	K23727	EC:2.3.1.291	U	0DJDW;18ZTA;12XI5;0UTVB;0V8YA;1B4WG;KOG1607;1CZKR;09Y0R	ceramide synthase 6 [Source:MGI Symbol;Acc:MGI:2442564]	241447	Q8C172
ENSMUSG00000022126	99361.9	33.8414	198690	5871.2	12.5194	4.34262e-97	1.27417e-94	14	103284413	103294009	+	2623	Acod1	GO:0002760;GO:0006952;GO:0016829;GO:0047613;GO:0071222;GO:0072573;	K17724	EC:4.1.1.6	S;T;K	12NUR;0V5MT;0UQK2;09UN7;18X5T;0DFY0;0IEAF;1AW9Z;1CQMH	aconitate decarboxylase 1 [Source:MGI Symbol;Acc:MGI:103206]	16365	P54987;A0A0R4J027
ENSMUSG00000049502	4964.23	584.858	9343.61	15.9759	3.99782	3.16223e-96	9.09992e-94	16	35746881	35759521	-	5725	Dtx3l	GO:0002230;GO:0002230;GO:0002376;GO:0004842;GO:0004842;GO:0004842;GO:0004857;GO:0004857;GO:0005634;GO:0005634;GO:0005634;GO:0005654;GO:0005654;GO:0005654;GO:0005737;GO:0005737;GO:0005737;GO:0005764;GO:0005764;GO:0005764;GO:0005765;GO:0005768;GO:0005769;GO:0005769;GO:0005829;GO:0005829;GO:0006281;GO:0006302;GO:0006302;GO:0006302;GO:0006325;GO:0006511;GO:0006511;GO:0006974;GO:0006974;GO:0006974;GO:…	K06058	EC:2.3.2.27	O;L	0UK74;1AX70;0IEH5;0A43V;1D0VZ;0VEYR;13NAY;0DN4G;191RG	deltex 3-like, E3 ubiquitin ligase [Source:MGI Symbol;Acc:MGI:2656973]	209200	Q3UIR3
ENSMUSG00000042129	29649.6	3843.87	55455.3	14.4269	3.85069	4.94612e-96	1.39649e-93	6	116609969	116650913	-	9209	Rassf4	GO:0003674;GO:0005575;GO:0007049;GO:0007165;GO:0007165;GO:0003674;GO:0005575;GO:0007049;GO:0007165;GO:0007165;	K09851	-	T	196YI;13MS5;0B19H;KOG4239;1BAEP;0WDUP;0V1SW;1DDHB;0E6IW	Ras association (RalGDS/AF-6) domain family member 4 [Source:MGI Symbol;Acc:MGI:2386853]	213391	Q8CB96
ENSMUSG00000039908	1136.76	2195.86	77.6623	0.0353676	-4.82143	1.72781e-95	4.78795e-93	11	119246383	119271905	+	3610	Slc26a11	GO:0005654;GO:0005654;GO:0005764;GO:0005765;GO:0005765;GO:0005765;GO:0005783;GO:0005783;GO:0005783;GO:0005794;GO:0005794;GO:0005794;GO:0005886;GO:0005886;GO:0005886;GO:0005887;GO:0006811;GO:0008271;GO:0008272;GO:0008272;GO:0008272;GO:0008272;GO:0008509;GO:0008509;GO:0008509;GO:0015116;GO:0015116;GO:0015301;GO:0015301;GO:0016020;GO:0016020;GO:0016021;GO:0016021;GO:0016021;GO:0016021;GO:0043231;GO:…	K14708	-	P	0V4TX;0DF51;18WM9;1AZHC;09TUP;1CPUU;0UGAW;12N5G;KOG0236	solute carrier family 26, member 11 [Source:MGI Symbol;Acc:MGI:2444589]	268512	Q80ZD3
ENSMUSG00000021733	4317.53	504.3	8130.76	16.1229	4.01104	1.83882e-95	5.00292e-93	14	7669823	7767484	-	15201	Slc4a7	GO:0005452;GO:0006811;GO:0006820;GO:0008509;GO:0015698;GO:0016020;GO:0016020;GO:0016021;GO:0016021;GO:0098656;GO:0005452;GO:0006811;GO:0006820;GO:0008509;GO:0015698;GO:0016020;GO:0016020;GO:0016021;GO:0016021;GO:0098656;GO:0005452;GO:0006811;GO:0006820;GO:0008509;GO:0015698;GO:0016020;GO:0016020;GO:0016021;GO:0016021;GO:0098656;GO:0005452;GO:0006811;GO:0006820;GO:0008509;GO:0015698;GO:0016020;GO:…	K13858	-	P	KOG1172;09VZ2;0DHY5;0V6NE;0UR5Y;12Q16;1CSNR;1B0XR	solute carrier family 4, sodium bicarbonate cotransporter, member 7 [Source:MGI Symbol;Acc:MGI:2443878]	218756	F8VQC9
ENSMUSG00000035107	2495.89	266.564	4725.21	17.7263	4.14782	1.879e-95	5.02097e-93	16	58228806	58290090	+	8401	Dcbld2	GO:0005887;GO:0005887;GO:0005887;GO:0009986;GO:0009986;GO:0009986;GO:0016020;GO:0016021;GO:0030308;GO:0030308;GO:0030308;GO:0042060;GO:0042060;GO:0042060;	K24794	-	T;U	18SAI;0DF4E;0II5Z;0V4TF;1AS2X;09TU5;1CPUA;12YUE;0UG9U	discoidin, CUB and LCCL domain containing 2 [Source:MGI Symbol;Acc:MGI:1920629]	73379	Q91ZV3
ENSMUSG00000035891	3123.03	5900.91	345.145	0.0584901	-4.09566	1.14746e-94	3.0124e-92	15	86023329	86070342	-	4812	Cerk	GO:0000166;GO:0000287;GO:0000287;GO:0000287;GO:0001727;GO:0001729;GO:0001729;GO:0001729;GO:0001729;GO:0003951;GO:0005524;GO:0005737;GO:0005739;GO:0005886;GO:0005886;GO:0005886;GO:0006665;GO:0006672;GO:0006672;GO:0006672;GO:0006672;GO:0016020;GO:0016020;GO:0016021;GO:0016021;GO:0016021;GO:0016301;GO:0016301;GO:0016310;GO:0016310;GO:0016740;GO:0046834;GO:0102773;	K04715	EC:2.7.1.138	T;I	0UPC1;0DNDQ;1AX7R;12NTX;1CXBK;09UKX;191SQ;0V5KB;KOG1115	ceramide kinase [Source:MGI Symbol;Acc:MGI:2386052]	223753	Q8K4Q7
ENSMUSG00000007655	5364.85	653.565	10076.1	15.4172	3.94647	4.18381e-94	1.07942e-91	6	17306334	17341451	+	3444	Cav1	GO:0000122;GO:0000139;GO:0000139;GO:0000139;GO:0000139;GO:0000149;GO:0000188;GO:0001525;GO:0001570;GO:0001666;GO:0001937;GO:0001937;GO:0001938;GO:0001960;GO:0002026;GO:0002080;GO:0002095;GO:0002931;GO:0003057;GO:0005102;GO:0005102;GO:0005515;GO:0005515;GO:0005515;GO:0005737;GO:0005739;GO:0005768;GO:0005768;GO:0005768;GO:0005778;GO:0005783;GO:0005783;GO:0005783;GO:0005794;GO:0005794;GO:0005794;GO:…	K06278	-	T;V	0IV7A;0A3GD;0VEBF;13KXN;1B1ZN;0DR3M;0UU92;1D08I;194HN	caveolin 1, caveolae protein [Source:MGI Symbol;Acc:MGI:102709]	12389	P49817
ENSMUSG00000042333	1448.77	132.43	2765.11	20.8797	4.38403	5.0325e-94	1.27638e-91	4	155006390	155013020	-	1438	Tnfrsf14	GO:0016020;GO:0016021;GO:0001618;GO:0002250;GO:0002376;GO:0002720;GO:0002720;GO:0005515;GO:0005886;GO:0005886;GO:0005886;GO:0009897;GO:0009897;GO:0016020;GO:0016021;GO:0016032;GO:0019955;GO:0031295;GO:0031625;GO:0045087;GO:0046642;GO:0046642;GO:0046718;GO:0050731;GO:0050731;GO:0050829;GO:0050829;GO:0050830;GO:0050830;GO:1905675;GO:2000406;GO:2000406;GO:0016020;GO:0016021;	K05152	-	-	-	tumor necrosis factor receptor superfamily, member 14 (herpesvirus entry mediator) [Source:MGI Symbol;Acc:MGI:2675303]	230979	Q80WM9
ENSMUSG00000026235	383.96	6.31838	761.602	120.538	6.91334	8.78705e-94	2.19149e-91	1	77343822	77491725	-	8054	Epha4	GO:0000166;GO:0004672;GO:0004672;GO:0004672;GO:0004672;GO:0004713;GO:0004713;GO:0004714;GO:0004714;GO:0005003;GO:0005004;GO:0005005;GO:0005005;GO:0005515;GO:0005515;GO:0005524;GO:0005524;GO:0005737;GO:0005737;GO:0005737;GO:0005741;GO:0005741;GO:0005768;GO:0005769;GO:0005783;GO:0005783;GO:0005794;GO:0005794;GO:0005886;GO:0005886;GO:0005886;GO:0005886;GO:0005887;GO:0005887;GO:0005887;GO:0005887;GO:…	K05105	EC:2.7.10.1	T	0DEEW;0UNNC;09T3T;18W05;1CP4M;KOG0196;0V42J;12PWI;1B4AC	Eph receptor A4 [Source:MGI Symbol;Acc:MGI:98277]	13838	Q03137
ENSMUSG00000027398	68320.8	34.0729	136607	4009.27	11.9691	1.05267e-93	2.58232e-91	2	129206490	129213059	-	1907	Il1b	GO:0000122;GO:0000165;GO:0000187;GO:0001660;GO:0001934;GO:0005125;GO:0005125;GO:0005125;GO:0005149;GO:0005178;GO:0005178;GO:0005576;GO:0005576;GO:0005576;GO:0005615;GO:0005615;GO:0005615;GO:0005615;GO:0005615;GO:0005737;GO:0005764;GO:0005776;GO:0005829;GO:0006954;GO:0006954;GO:0006954;GO:0006954;GO:0006955;GO:0007204;GO:0007613;GO:0008284;GO:0008285;GO:0009743;GO:0010573;GO:0010573;GO:0010575;GO:…	K04519	-	T;V	0DRYM;1CWH6;18TT7;0VFAB;0UPAA;13ME0;0IGSZ;1ASW1;0A43M	interleukin 1 beta [Source:MGI Symbol;Acc:MGI:96543]	16176	P10749
ENSMUSG00000034575	3069.66	353.358	5785.97	16.3743	4.03336	1.49407e-93	3.60602e-91	13	69646078	69682736	-	8918	Tent4a	GO:0004652;GO:0005654;GO:0005794;GO:0016779;GO:0031965;GO:0043631;GO:0000166;GO:0004652;GO:0004652;GO:0004652;GO:0005524;GO:0005634;GO:0005634;GO:0005654;GO:0005654;GO:0005730;GO:0005737;GO:0005794;GO:0006397;GO:0016740;GO:0016779;GO:0016779;GO:0031123;GO:0031499;GO:0031965;GO:0042493;GO:0043631;GO:0046872;GO:0060212;GO:0060212;GO:0070568;GO:0070568;GO:0071076;GO:0071076;GO:1905870;GO:1905870;GO:…	K03514	EC:2.7.7.19	L	12R8T;1AXRX;0DI9V;0UKQN;1CT0B;09WZB;KOG1906;0V7XC;18VWU	terminal nucleotidyltransferase 4A [Source:MGI Symbol;Acc:MGI:2682295]	210106	Q6PB75
ENSMUSG00000045502	3910.07	12.117	7808.02	644.387	9.33178	4.78537e-93	1.13664e-90	5	124001633	124003562	-	1930	Hcar2	GO:0001614;GO:0001781;GO:0004930;GO:0004930;GO:0004930;GO:0005525;GO:0005886;GO:0005886;GO:0006915;GO:0007165;GO:0007186;GO:0007186;GO:0007186;GO:0016020;GO:0016020;GO:0016021;GO:0016021;GO:0016021;GO:0030054;GO:0033031;GO:0033031;GO:0035590;GO:0050995;GO:0050995;GO:0050995;GO:0070165;GO:0070165;GO:0070165;GO:0070553;GO:0070553;GO:0070553;	K08402	-	T	0IKI5;09TWR;1CPWS;13JB3;1B1UV;0V4VT;18S7G;0DF77;0UHAA	hydroxycarboxylic acid receptor 2 [Source:MGI Symbol;Acc:MGI:1933383]	80885	Q9EP66;Q0VBA6
ENSMUSG00000038843	1237.26	2401.55	72.9806	0.030389	-5.04031	5.62871e-93	1.31606e-90	19	17303505	17350208	-	5760	Gcnt1	GO:0000139;GO:0003829;GO:0003829;GO:0003829;GO:0005615;GO:0005615;GO:0005794;GO:0005802;GO:0005802;GO:0006486;GO:0009101;GO:0009101;GO:0009101;GO:0016020;GO:0016020;GO:0016021;GO:0016740;GO:0016757;GO:0018215;GO:0031985;GO:0031985;GO:0031985;GO:0032868;GO:0048729;GO:0050901;GO:0050901;GO:0050901;GO:0060352;GO:0060352;GO:0060352;GO:0060993;GO:0000139;GO:0003829;GO:0003829;GO:0005615;GO:0005794;GO:…	K00727	EC:2.4.1.102	-	-	glucosaminyl (N-acetyl) transferase 1, core 2 [Source:MGI Symbol;Acc:MGI:95676]	14537	Q09324
ENSMUSG00000026012	1807.61	3437.41	177.808	0.0517273	-4.27293	9.17143e-92	2.1114e-89	1	60755959	60812518	+	6122	Cd28	GO:0001772;GO:0002020;GO:0002020;GO:0002863;GO:0005886;GO:0005886;GO:0006955;GO:0009897;GO:0009897;GO:0009897;GO:0009986;GO:0009986;GO:0010628;GO:0010628;GO:0010629;GO:0010629;GO:0014068;GO:0016020;GO:0016020;GO:0016021;GO:0019901;GO:0031295;GO:0031295;GO:0032733;GO:0032733;GO:0032733;GO:0032743;GO:0032743;GO:0032743;GO:0032753;GO:0032753;GO:0032753;GO:0042102;GO:0042102;GO:0042102;GO:0042102;GO:…	K06470	-	T	13R2A;09Z38;0DKIS;18TQB;0VA0R;0IXMM;1CVCU;1AZ54;0UP4N	CD28 antigen [Source:MGI Symbol;Acc:MGI:88327]	12487	P31041;Q8CDB3
ENSMUSG00000038037	493.437	18.6297	968.245	51.9731	5.69969	1.2749e-90	2.89055e-88	16	10600104	10603400	-	2908	Socs1	GO:0001817;GO:0001932;GO:0005159;GO:0005159;GO:0005515;GO:0005515;GO:0005634;GO:0005654;GO:0005654;GO:0005737;GO:0005829;GO:0005942;GO:0007259;GO:0009968;GO:0010533;GO:0016567;GO:0019210;GO:0019221;GO:0019901;GO:0019901;GO:0031410;GO:0033673;GO:0035556;GO:0036464;GO:0036464;GO:0040008;GO:0042509;GO:0042532;GO:0042532;GO:0043372;GO:0043377;GO:0043551;GO:0045444;GO:0045591;GO:0045591;GO:0046425;GO:…	K04694	-	T	0UNSY;13F34;18ZJU;1AUZ2;KOG4566;1CUR4;0DJXM;0A2EF;0VDA1	suppressor of cytokine signaling 1 [Source:MGI Symbol;Acc:MGI:1354910]	12703	O35716
ENSMUSG00000020178	2147.59	5.63478	4289.54	761.262	9.57225	1.13694e-89	2.53929e-87	10	75152711	75170618	+	3062	Adora2a	GO:0001609;GO:0001609;GO:0001609;GO:0001963;GO:0001973;GO:0001973;GO:0001973;GO:0001975;GO:0004930;GO:0004930;GO:0005515;GO:0005882;GO:0005882;GO:0005886;GO:0005886;GO:0005886;GO:0005887;GO:0006355;GO:0006355;GO:0006469;GO:0006469;GO:0007165;GO:0007186;GO:0007186;GO:0007186;GO:0007189;GO:0007189;GO:0007205;GO:0007205;GO:0007271;GO:0007271;GO:0007626;GO:0007626;GO:0008285;GO:0008285;GO:0012505;GO:…	K04266	-	T	KOG3656;13HH2;1CS68;09Y1D;0V8YY;0UJBG;18U0Z;0DHG2;1AVP3	adenosine A2a receptor [Source:MGI Symbol;Acc:MGI:99402]	11540	Q60613
ENSMUSG00000034459	16543.8	43.3813	33044.2	761.716	9.57311	1.3013e-89	2.86363e-87	19	34618271	34627409	+	2656	Ifit1	GO:0002376;GO:0003723;GO:0003723;GO:0005515;GO:0005737;GO:0005829;GO:0009615;GO:0009617;GO:0035457;GO:0035458;GO:0045087;GO:0051607;GO:0051607;	K14217	-	S;P	0DNWM;0A0WM;1CXU0;13I8N;1B0KV;0V5W7;KOG1124;1949C;0UM6F	interferon-induced protein with tetratricopeptide repeats 1 [Source:MGI Symbol;Acc:MGI:99450]	15957	Q64282
ENSMUSG00000006818	20587.1	932.36	40241.8	43.1613	5.43167	2.32576e-89	5.04386e-87	17	13225733	13258950	+	10008	Sod2	GO:0004784;GO:0005759;GO:0006801;GO:0019430;GO:0046872;GO:0055114;GO:0000302;GO:0000303;GO:0001306;GO:0001315;GO:0001315;GO:0001666;GO:0001836;GO:0001889;GO:0003032;GO:0003069;GO:0003677;GO:0003677;GO:0004784;GO:0004784;GO:0004784;GO:0004784;GO:0004784;GO:0005515;GO:0005737;GO:0005737;GO:0005739;GO:0005739;GO:0005739;GO:0005739;GO:0005743;GO:0005759;GO:0005759;GO:0006357;GO:0006357;GO:0006749;GO:…	K04564	EC:1.15.1.1	P	0DMMM;1CWH5;0UTQD;KOG0876;0V45V;12R7H;1B44M;18Z5H;09ZJN	superoxide dismutase 2, mitochondrial [Source:MGI Symbol;Acc:MGI:98352]	20656	P09671;Q4FJX9
ENSMUSG00000041642	2290.85	4319.51	262.19	0.060699	-4.04218	1.28478e-88	2.74649e-86	1	136059127	136105736	+	12184	Kif21b	GO:0000166;GO:0003774;GO:0003777;GO:0005524;GO:0005524;GO:0007018;GO:0008017;GO:0000166;GO:0003774;GO:0003777;GO:0005524;GO:0005524;GO:0007018;GO:0008017;GO:0003777;GO:0007018;	K24185	-	Z	0V7JF;1CSPT;12QPN;09WKT;1AZMD;0UJZ1;195J2;0DHZ3;KOG0244	kinesin family member 21B [Source:MGI Symbol;Acc:MGI:109234]	16565	Q9QXL1;F8VQE2
ENSMUSG00000035513	819.972	60.8054	1579.14	25.9703	4.69879	2.37809e-88	5.01208e-86	2	29084553	29143017	-	3990	Ntng2	GO:0003674;GO:0005515;GO:0005886;GO:0005886;GO:0005886;GO:0007275;GO:0007399;GO:0007409;GO:0009887;GO:0009888;GO:0010975;GO:0016020;GO:0016477;GO:0030154;GO:0030424;GO:0031225;GO:0034446;GO:0043256;GO:0045171;GO:0045171;GO:0046658;GO:0050804;GO:0070831;GO:0090543;GO:0090543;GO:0098685;GO:0098698;GO:0098978;GO:0099029;GO:0099560;GO:0150011;GO:1905606;GO:2001222;GO:0003674;GO:0005515;GO:0005886;GO:…	K16359	-	T;W	18U2B;1CRVW;1AUQ7;0UH30;KOG3512;0V6VW;13IK3;09VXD;0DH5M	netrin G2 [Source:MGI Symbol;Acc:MGI:2159341]	171171	Q8R4F1;A2AKW8
ENSMUSG00000028385	1150.4	2203.43	97.3698	0.0441902	-4.50013	9.34821e-88	1.94287e-85	4	59805840	59904737	+	7795	Snx30	GO:0005737;GO:0015031;GO:0035091;	K17921	-	U	194IH;1CPFF;12PDA;0DERN;0UFS9;09TEK;KOG2273;1B0PZ;0V4DS	sorting nexin family member 30 [Source:MGI Symbol;Acc:MGI:2443882]	209131	Q8CE50
ENSMUSG00000040435	5591.75	776.779	10406.7	13.3973	3.74387	1.74742e-87	3.58198e-85	7	45172340	45175692	-	2937	Ppp1r15a	GO:0000164;GO:0000164;GO:0005737;GO:0005739;GO:0005739;GO:0005741;GO:0005783;GO:0005783;GO:0005783;GO:0005789;GO:0005794;GO:0006417;GO:0006915;GO:0008157;GO:0010628;GO:0016020;GO:0016020;GO:0019888;GO:0019888;GO:0019901;GO:0019903;GO:0030968;GO:0032515;GO:0032516;GO:0032516;GO:0033138;GO:0034976;GO:0034976;GO:0034976;GO:0035308;GO:0036496;GO:0045943;GO:0060734;GO:0070262;GO:0070972;GO:1902310;GO:…	K14019	-	T	0USCT;1CZEM;0ITE6;12TD0;0A2QW;1AW9F;0DQCM;0VDKN;193NM	protein phosphatase 1, regulatory subunit 15A [Source:MGI Symbol;Acc:MGI:1927072]	17872	P17564;B2RRL7
ENSMUSG00000025795	1400.77	2664.62	136.917	0.0513832	-4.28256	1.0464e-86	2.116e-84	10	121246255	121312252	-	3826	Rassf3	GO:0005737;GO:0005737;GO:0005829;GO:0005856;GO:0005874;GO:0005886;GO:0007165;GO:0007165;GO:0042802;GO:0042981;	K09852	-	Z;T	1CQH1;KOG4239;0UH9A;12NS7;1ASX7;18VP1;09UHY;0V5H4;0DFTM	Ras association (RalGDS/AF-6) domain family member 3 [Source:MGI Symbol;Acc:MGI:2179722]	192678	Q99P51
ENSMUSG00000025225	8195.94	452.283	15939.6	35.2425	5.13925	1.77484e-86	3.54117e-84	19	46292759	46300824	+	4584	Nfkb2	GO:0003677;GO:0003677;GO:0003700;GO:0005634;GO:0005737;GO:0005737;GO:0006355;GO:0007165;GO:0000785;GO:0000978;GO:0000978;GO:0000981;GO:0001228;GO:0002268;GO:0002467;GO:0003677;GO:0003677;GO:0003700;GO:0005515;GO:0005634;GO:0005634;GO:0005737;GO:0005737;GO:0005737;GO:0005829;GO:0006355;GO:0006355;GO:0006357;GO:0007165;GO:0030198;GO:0033257;GO:0038061;GO:0045944;GO:0048511;GO:0048535;GO:0048536;GO:…	K04469	-	K;E	0VD3P;KOG0504;0A3C4;18TUE;1B0KB;0UJGQ;1CTIN;0DITA;13GBI	nuclear factor of kappa light polypeptide gene enhancer in B cells 2, p49/p100 [Source:MGI Symbol;Acc:MGI:1099800]	18034	Q9WTK5;Q3UG25;Q3UV15
ENSMUSG00000054855	304.439	3.28914	605.589	184.118	7.52448	5.2202e-86	1.02783e-83	15	98561302	98575342	-	2967	Rnd1	GO:0000166;GO:0003924;GO:0003924;GO:0005102;GO:0005525;GO:0005525;GO:0005525;GO:0005737;GO:0005829;GO:0005856;GO:0005856;GO:0005886;GO:0005886;GO:0005886;GO:0005912;GO:0005938;GO:0007015;GO:0007015;GO:0007162;GO:0007163;GO:0007264;GO:0008360;GO:0015629;GO:0016020;GO:0016322;GO:0016477;GO:0019901;GO:0030865;GO:0031410;GO:0032956;GO:0042995;GO:0043231;GO:0043231;GO:0000166;GO:0003924;GO:0003924;GO:…	K07531	-	S;Z	18XV1;09ZA0;0DKS8;0VA74;KOG0393;1CVKW;13KD7;1AYY6;0UU21	Rho family GTPase 1 [Source:MGI Symbol;Acc:MGI:2444878]	223881	Q8BLR7
ENSMUSG00000048537	1829.57	214.958	3444.18	16.0225	4.00203	1.26746e-85	2.46316e-83	9	44597601	44646495	-	7179	Phldb1	GO:0010470;GO:0010717;GO:0045180;GO:0070507;GO:1904261;GO:0003674;GO:0010470;GO:0010717;GO:0045180;GO:0045180;GO:0070507;GO:0070507;GO:1904261;	K23794	-	Z;T	1BBAH;0WIB8;0E914;1DFXA;13F2P;0ISGZ;197CM;0B5P1;0V3JA	pleckstrin homology like domain, family B, member 1 [Source:MGI Symbol;Acc:MGI:2143230]	102693	Q6PDH0
ENSMUSG00000021025	17517.3	705.213	34329.3	48.6794	5.60524	2.64316e-84	5.0708e-82	12	55536195	55539432	-	1610	Nfkbia	GO:0005515;GO:0005515;GO:0005515;GO:0005634;GO:0005634;GO:0005634;GO:0005737;GO:0005737;GO:0005737;GO:0005829;GO:0005829;GO:0005886;GO:0005886;GO:0006606;GO:0007249;GO:0007249;GO:0007253;GO:0007253;GO:0008139;GO:0008139;GO:0010468;GO:0010745;GO:0010745;GO:0010875;GO:0010875;GO:0010888;GO:0010888;GO:0019899;GO:0019899;GO:0031072;GO:0031625;GO:0031625;GO:0031663;GO:0032088;GO:0032088;GO:0032270;GO:…	K04734	-	K;E	0UMFD;KOG0504;1AWTT;0V8EB;1CTJ4;18VJA;09XG9;0DITT;13MEG	nuclear factor of kappa light polypeptide gene enhancer in B cells inhibitor, alpha [Source:MGI Symbol;Acc:MGI:104741]	18035	Q9Z1E3
ENSMUSG00000042622	829.114	70.4195	1587.81	22.5479	4.49492	4.73182e-84	8.9629e-82	15	79230821	79243276	+	2594	Maff	GO:0000978;GO:0000981;GO:0001228;GO:0001701;GO:0003677;GO:0003677;GO:0003700;GO:0005634;GO:0005634;GO:0005654;GO:0005654;GO:0005739;GO:0006355;GO:0006357;GO:0035914;GO:0043565;GO:0045604;GO:0045604;GO:0045944;GO:1990837;GO:0000978;GO:0000981;GO:0001228;GO:0001228;GO:0001701;GO:0003677;GO:0003677;GO:0003700;GO:0005634;GO:0005634;GO:0005654;GO:0005654;GO:0005654;GO:0005739;GO:0005739;GO:0006355;GO:…	K09037	-	K	0VETP;13PV3;0DRIE;0UUE2;0A3YU;1AYB2;KOG4196;193BP;1CXHH	v-maf musculoaponeurotic fibrosarcoma oncogene family, protein F (avian) [Source:MGI Symbol;Acc:MGI:96910]	17133	O54791;Q3U0G5
ENSMUSG00000037126	1130.18	94.221	2166.14	22.99	4.52293	7.36904e-84	1.37838e-81	19	46300526	46315595	-	7636	Psd	GO:0001726;GO:0005085;GO:0005085;GO:0005515;GO:0005543;GO:0005886;GO:0014069;GO:0016020;GO:0016021;GO:0031175;GO:0032012;GO:0032154;GO:0032154;GO:0032587;GO:0032587;GO:0042995;GO:0043197;GO:0050790;GO:0098999;GO:0099092;GO:0001726;GO:0005085;GO:0005085;GO:0005515;GO:0005543;GO:0005886;GO:0014069;GO:0016020;GO:0016021;GO:0031175;GO:0032012;GO:0032154;GO:0032154;GO:0032587;GO:0032587;GO:0042995;GO:…	K12494	-	U	0DHAJ;0UQW6;12PMY;09W1G;18TPJ;1B0Q8;1CS0M;KOG0932;0V6ZS	pleckstrin and Sec7 domain containing [Source:MGI Symbol;Acc:MGI:1920978]	73728	Q5DTT2
ENSMUSG00000033355	3547.72	278.631	6816.81	24.4654	4.61267	1.54213e-83	2.84895e-81	16	23339041	23432972	+	2131	Rtp4	GO:0001580;GO:0001580;GO:0005515;GO:0005737;GO:0005737;GO:0006612;GO:0006612;GO:0016020;GO:0016021;GO:0031849;GO:0051205;GO:0051607;GO:0001580;GO:0001580;GO:0005515;GO:0005737;GO:0005737;GO:0006612;GO:0006612;GO:0016020;GO:0016021;GO:0031849;GO:0051205;GO:0051607;GO:0001580;GO:0001580;GO:0005515;GO:0005737;GO:0005737;GO:0006612;GO:0006612;GO:0016020;GO:0016021;GO:0031849;GO:0051205;GO:0051607;	-	-	T;U	13PC0;1967W;1B03R;09WVI;0UUMV;0DTMI;0IH22;0VEXE;1D1CR	receptor transporter protein 4 [Source:MGI Symbol;Acc:MGI:1915025]	67775	Q9ER80
ENSMUSG00000016496	10040.5	1579.16	18501.9	11.7163	3.55044	1.01023e-82	1.84355e-80	19	29344855	29365495	+	3622	Cd274	GO:0002250;GO:0002376;GO:0002845;GO:0002845;GO:0002845;GO:0005515;GO:0005515;GO:0005654;GO:0005768;GO:0005886;GO:0005886;GO:0005886;GO:0006955;GO:0006955;GO:0006955;GO:0007165;GO:0007165;GO:0007166;GO:0007166;GO:0007166;GO:0009897;GO:0009897;GO:0009986;GO:0009986;GO:0015629;GO:0016020;GO:0016021;GO:0030335;GO:0030335;GO:0031295;GO:0031295;GO:0031295;GO:0031901;GO:0031901;GO:0031901;GO:0032689;GO:…	K06745	-	T	09W7E;1CS6T;13QT3;1AVR7;18WQ4;0IIBU;0V75P;0DHGI;0UJ64	CD274 antigen [Source:MGI Symbol;Acc:MGI:1926446]	60533	Q9EP73;Q3U472
ENSMUSG00000026104	1587.47	194.738	2980.19	15.3036	3.9358	1.43491e-81	2.58698e-79	1	52158599	52201024	+	7105	Stat1	GO:0003677;GO:0003677;GO:0003700;GO:0005634;GO:0005634;GO:0005737;GO:0006355;GO:0007165;GO:0003677;GO:0003677;GO:0003700;GO:0005634;GO:0005634;GO:0005737;GO:0006355;GO:0007165;GO:0003677;GO:0003677;GO:0003700;GO:0005634;GO:0005634;GO:0005737;GO:0006355;GO:0007165;GO:0003677;GO:0003677;GO:0003700;GO:0005634;GO:0005634;GO:0005737;GO:0006355;GO:0007165;GO:0003700;GO:0005634;GO:0006355;GO:0007165;GO:…	K11220	-	K	1CT96;09X75;13KVM;KOG3667;0DIIK;0V85R;19261;0UM31;1AY23	signal transducer and activator of transcription 1 [Source:MGI Symbol;Acc:MGI:103063]	20846	Q8CFQ1;A0A087WSP5;Q8C8M3
ENSMUSG00000030403	11714	1520.16	21907.9	14.4116	3.84916	1.90464e-81	3.39298e-79	7	18990854	19005742	-	2617	Vasp	GO:0001843;GO:0001843;GO:0003779;GO:0003779;GO:0005515;GO:0005522;GO:0005522;GO:0005522;GO:0005737;GO:0005829;GO:0005829;GO:0005829;GO:0005856;GO:0005856;GO:0005886;GO:0005886;GO:0005886;GO:0005923;GO:0005925;GO:0005925;GO:0005925;GO:0007411;GO:0007411;GO:0008154;GO:0016020;GO:0017124;GO:0017124;GO:0017124;GO:0030027;GO:0030036;GO:0030036;GO:0030054;GO:0030175;GO:0030838;GO:0030838;GO:0030838;GO:…	K06274	-	Z;T	KOG4590;0VABX;1AZNP;09ZEV;13PCB;0DKX4;190ZD;1CVSC;0UPZ8	vasodilator-stimulated phosphoprotein [Source:MGI Symbol;Acc:MGI:109268]	22323	P70460
ENSMUSG00000038507	5937.35	854.897	11019.8	12.8902	3.68821	2.3902e-81	4.20378e-79	6	39063344	39095283	-	3995	Parp12	GO:0003950;GO:0005575;GO:0005634;GO:0016740;GO:0046872;GO:0046872;GO:0070213;GO:0070213;GO:0070213;GO:0140289;GO:0140289;GO:0140289;GO:1990404;GO:1990404;GO:1990404;	K15259	EC:2.4.2.30	S	1CRAF;09VC4;0V6BA;18SQ4;1AV62;0IEI4;12P7S;0DGKK;0UIER	poly (ADP-ribose) polymerase family, member 12 [Source:MGI Symbol;Acc:MGI:2143990]	243771	Q8BZ20
ENSMUSG00000079197	3659.35	537.01	6781.69	12.6286	3.65862	2.41596e-81	4.20378e-79	14	55824898	55828570	-	1764	Psme2	GO:0000502;GO:0005515;GO:0005654;GO:0005737;GO:0008537;GO:0010950;GO:0019884;GO:0042802;GO:0061133;GO:0061136;GO:2000045;GO:0000502;GO:0008537;GO:0000502;GO:0008537;	K06697	-	O	0A1VR;0US2U;1B22K;18U73;1CYGD;KOG4470;12U3Q;0DPHV;0VCRB	proteasome (prosome, macropain) activator subunit 2 (PA28 beta) [Source:MGI Symbol;Acc:MGI:1096365]	19188	P97372;Q5SVP3
ENSMUSG00000042675	896.158	1715.25	77.0618	0.0449274	-4.47626	1.57698e-80	2.7124e-78	7	126376127	126379686	+	1848	Ypel3	GO:0003674;GO:0005575;GO:0005634;GO:0005730;GO:0006915;GO:0046872;GO:2000774;GO:0003674;GO:0005575;GO:0005634;GO:0005730;GO:0006915;GO:0046872;GO:2000774;GO:0003674;GO:0005575;GO:0005634;GO:0005730;GO:0006915;GO:0046872;GO:2000774;GO:2000774;GO:0003674;GO:0005575;GO:0005634;GO:0005730;GO:0006915;GO:0046872;GO:2000774;	-	-	S;U	1D1KX;192ZK;13RB7;0UUQ2;0VFQX;0A4WA;0DSBH;1B5IP;KOG3399	yippee like 3 [Source:MGI Symbol;Acc:MGI:1913340]	66090	P61237
ENSMUSG00000030156	6684.6	7.55672	13361.6	1768.18	10.7881	2.69124e-80	4.57633e-78	6	129244288	129252399	-	6509	Cd69	GO:0005509;GO:0009897;GO:0009897;GO:0009986;GO:0016020;GO:0016021;GO:0030246;GO:0032991;GO:0035690;GO:0042802;	K06502	-	T;V	195IN;1CVY5;0UQ6A;13UWE;KOG4297;0A4RD;1AZWK;0DM34;0VFK9	CD69 antigen [Source:MGI Symbol;Acc:MGI:88343]	12515	P37217;Q3U6A8
ENSMUSG00000049866	3060.01	6008.11	111.905	0.0186257	-5.74656	5.88063e-80	9.88739e-78	1	88600847	88629943	-	5492	Arl4c	GO:0000166;GO:0005525;GO:0005525;GO:0005525;GO:0005737;GO:0005737;GO:0005829;GO:0005886;GO:0005886;GO:0005886;GO:0006886;GO:0016020;GO:0016192;GO:0030175;GO:0032456;GO:0032456;GO:0032456;GO:0042995;GO:0043014;GO:0043014;GO:0000166;GO:0005525;GO:0005525;GO:0005525;GO:0005737;GO:0005737;GO:0005829;GO:0005886;GO:0005886;GO:0005886;GO:0006886;GO:0016020;GO:0016192;GO:0030175;GO:0032456;GO:0032456;GO:…	K07945	-	U	1CRVI;0UM0P;0DH58;0V6VJ;KOG0070;195MH;09VX4;1AWGR;13HDS	ADP-ribosylation factor-like 4C [Source:MGI Symbol;Acc:MGI:2445172]	320982	P61208
ENSMUSG00000031004	3419.84	509.417	6330.27	12.4265	3.63535	6.97798e-80	1.16021e-77	7	135291513	135318090	-	10061	Mki67	GO:0000166;GO:0000775;GO:0000793;GO:0003677;GO:0005524;GO:0005634;GO:0005634;GO:0005654;GO:0005694;GO:0005730;GO:0005730;GO:0005737;GO:0007049;GO:0007088;GO:0007088;GO:0008022;GO:0008283;GO:0016604;GO:0051321;GO:0051983;GO:0051983;GO:0072574;GO:1902275;GO:1990705;GO:0005634;GO:0007049;	K17582	-	T	1CU7X;0JR7C;1AXNZ;09Y2G;0DJFE;194SC;0V8ZX;0UGIJ;13NWP	antigen identified by monoclonal antibody Ki 67 [Source:MGI Symbol;Acc:MGI:106035]	17345	E9PVX6
ENSMUSG00000031779	255.319	1.88918	508.749	269.296	8.07305	1.03669e-79	1.70472e-77	8	95472218	95478327	+	2325	Ccl22	GO:0002548;GO:0005125;GO:0005576;GO:0005576;GO:0005615;GO:0005615;GO:0005615;GO:0005615;GO:0006935;GO:0006954;GO:0006954;GO:0006954;GO:0006955;GO:0007165;GO:0007186;GO:0008009;GO:0008009;GO:0030593;GO:0031640;GO:0043547;GO:0048020;GO:0048247;GO:0060326;GO:0061844;GO:0070098;GO:0070374;GO:0071346;GO:0071347;GO:0071356;	K21095	-	O;W	13VFZ;0DVRV;1D52B;0A9NQ;0UWA2;0VKK6;0J20K;1B6T1;193QM	chemokine (C-C motif) ligand 22 [Source:MGI Symbol;Acc:MGI:1306779]	20299	O88430;Q546S6
ENSMUSG00000020400	8969.4	1499.31	16439.5	10.9647	3.4548	2.12573e-78	3.45755e-76	11	54801611	54853743	-	3539	Tnip1	GO:0002755;GO:0043124;GO:0050727;GO:0070373;GO:0002755;GO:0043124;GO:0050727;GO:0070373;GO:0002755;GO:0043124;GO:0050727;GO:0070373;GO:0002755;GO:0002755;GO:0005515;GO:0005634;GO:0005654;GO:0005737;GO:0005737;GO:0005829;GO:0006954;GO:0007159;GO:0007159;GO:0009101;GO:0031593;GO:0031593;GO:0042802;GO:0043124;GO:0043124;GO:0043124;GO:0043124;GO:0045944;GO:0045944;GO:0050727;GO:0050729;GO:0051019;GO:…	K23829	-	T;K	0VAEF;1CVUX;09ZH8;0UQ2W;1B0F2;0DM03;19116;0IEGE;13CJI	TNFAIP3 interacting protein 1 [Source:MGI Symbol;Acc:MGI:1926194]	57783	Q9WUU8
ENSMUSG00000028599	49432.6	8736.78	90128.3	10.316	3.36681	1.07287e-77	1.72629e-75	4	144940033	144973440	-	3818	Tnfrsf1b	GO:0002718;GO:0002724;GO:0002724;GO:0003176;GO:0003177;GO:0003332;GO:0005031;GO:0005031;GO:0005031;GO:0005031;GO:0005515;GO:0005634;GO:0005634;GO:0006954;GO:0006954;GO:0006955;GO:0006955;GO:0007166;GO:0007568;GO:0008630;GO:0008630;GO:0010614;GO:0016020;GO:0016020;GO:0016020;GO:0016020;GO:0016021;GO:0030424;GO:0030424;GO:0031625;GO:0031625;GO:0031641;GO:0031643;GO:0031643;GO:0032496;GO:0033209;GO:…	K05141	-	T	13MDA;1CXWX;0A1BV;18YYD;0IJ06;0DNZC;0VC7E;0UNTC;1B010	tumor necrosis factor receptor superfamily, member 1b [Source:MGI Symbol;Acc:MGI:1314883]	21938	P25119;Q545P4
ENSMUSG00000021281	47739.2	8436.72	87041.7	10.317	3.36695	1.67155e-77	2.66097e-75	12	111408903	111421452	+	4984	Tnfaip2	GO:0000145;GO:0000145;GO:0000149;GO:0001525;GO:0006887;GO:0006887;GO:0007275;GO:0030154;GO:0051601;GO:0000145;GO:0006887;GO:0000145;GO:0006887;GO:0000145;GO:0006887;GO:0000145;GO:0006887;	K19989	-	U	0VDJS;18TZB;KOG2286;1B41V;133HT;1CZDD;0A2PZ;0UTGX;0DQBF	tumor necrosis factor, alpha-induced protein 2 [Source:MGI Symbol;Acc:MGI:104960]	21928	Q61333
ENSMUSG00000020841	20791.3	3631.75	37950.9	10.4498	3.3854	1.72993e-77	2.72492e-75	11	76669250	76737844	-	8332	Cpd	GO:0004180;GO:0004181;GO:0004181;GO:0004181;GO:0005615;GO:0005634;GO:0005802;GO:0005886;GO:0006508;GO:0006508;GO:0006518;GO:0006518;GO:0008233;GO:0008237;GO:0008270;GO:0016020;GO:0016021;GO:0016485;GO:0016787;GO:0043231;GO:0044877;GO:0046872;GO:0048471;GO:0051721;	K07752	EC:3.4.17.22	O;T;E;U	1CRJS;12P19;18Y9Q;1ASM2;0UITB;09V9C;0V6KB;KOG2649;0DFQZ	carboxypeptidase D [Source:MGI Symbol;Acc:MGI:107265]	12874	O89001
ENSMUSG00000002983	1763.77	242.416	3285.13	13.5516	3.7604	2.77657e-77	4.32798e-75	7	19340142	19363363	-	3885	Relb	GO:0000785;GO:0000785;GO:0000785;GO:0000978;GO:0000978;GO:0000978;GO:0000978;GO:0000981;GO:0003677;GO:0003677;GO:0003677;GO:0003700;GO:0005515;GO:0005515;GO:0005515;GO:0005634;GO:0005634;GO:0005634;GO:0005634;GO:0005634;GO:0005654;GO:0005654;GO:0005737;GO:0005737;GO:0005813;GO:0005813;GO:0005815;GO:0005829;GO:0005829;GO:0005856;GO:0006355;GO:0006357;GO:0006357;GO:0006954;GO:0007249;GO:0010628;GO:…	K09253	-	K	0DJYW;1AWYK;0A0WR;0IFBK;13IH3;0UNAN;18TJS;1CYNR;0VD2C	avian reticuloendotheliosis viral (v-rel) oncogene related B [Source:MGI Symbol;Acc:MGI:103289]	19698	Q04863
ENSMUSG00000048498	497.761	32.1466	963.376	29.9682	4.90536	4.61081e-77	7.11301e-75	11	114942743	114953003	-	2088	Cd300e	GO:0002376;GO:0004888;GO:0005886;GO:0005886;GO:0008150;GO:0016020;GO:0016021;	K06719	-	T	196YT;0B1CN;145H6;0JCED;1BAF9;0E6M7;1DDJF;0WDY0;0V1UE	CD300E molecule [Source:MGI Symbol;Acc:MGI:2387602]	217306	Q8K249
ENSMUSG00000026131	8665.62	1290.18	16041.1	12.4332	3.63613	1.09845e-76	1.67726e-74	1	33947306	34347742	+	41619	Dst	GO:0003779;GO:0005509;GO:0005737;GO:0005856;GO:0005856;GO:0005874;GO:0008017;GO:0016020;GO:0042995;GO:0045104;GO:0046872;GO:0003779;GO:0005737;GO:0005856;GO:0005856;GO:0005874;GO:0008092;GO:0045104;GO:0003779;GO:0003779;GO:0003779;GO:0005198;GO:0005509;GO:0005515;GO:0005515;GO:0005515;GO:0005634;GO:0005635;GO:0005737;GO:0005737;GO:0005783;GO:0005789;GO:0005856;GO:0005856;GO:0005874;GO:0005882;GO:…	K10382	-	Z	12PJV;09UFA;0DH7H;0UKX7;1B4JZ;1CRXN;0V5EN;18VX5;KOG0516;KOG0517	dystonin [Source:MGI Symbol;Acc:MGI:104627]	13518	Q91ZU6
ENSMUSG00000058013	9199.68	1593.41	16806	10.5472	3.39879	2.20226e-76	3.32875e-74	5	93241296	93324306	+	9472	Septin11	GO:0000166;GO:0001725;GO:0003924;GO:0005515;GO:0005515;GO:0005525;GO:0005525;GO:0005737;GO:0005856;GO:0005940;GO:0007049;GO:0015630;GO:0030054;GO:0030424;GO:0031105;GO:0031105;GO:0031105;GO:0032153;GO:0034613;GO:0042995;GO:0043197;GO:0045202;GO:0050807;GO:0051301;GO:0060090;GO:0061640;GO:0098794;GO:0098978;GO:0098982;GO:0099629;GO:0000166;GO:0005525;GO:0005525;GO:0005856;GO:0005525;GO:0005856;GO:…	K16939	-	Z;D	0V73G;12QMH;0DHEE;09W55;18WE1;KOG2655;1CS4E;0UJJ4;1B551	septin 11 [Source:MGI Symbol;Acc:MGI:1277214]	52398	Q8C1B7
ENSMUSG00000070720	217.763	0.39094	435.134	1113.05	10.1203	3.97382e-76	5.94642e-74	4	131648511	131650451	+	1476	Tmem200b	GO:0003674;GO:0005575;GO:0008150;GO:0016020;GO:0016021;GO:0003674;GO:0005575;GO:0008150;GO:0016020;GO:0016021;	-	-	S	0DIW2;1AYEN;1CTMG;09XIN;1954M;KOG4823;0UMIB;0V8GT;13SU4	transmembrane protein 200B [Source:MGI Symbol;Acc:MGI:3646343]	623230	D3Z0P8
ENSMUSG00000038437	5016.54	840.207	9192.87	10.9412	3.4517	7.59477e-76	1.12523e-73	11	97554240	97576289	+	7451	Mllt6	GO:0003014;GO:0005634;GO:0007588;GO:0010765;GO:0031491;GO:0031491;GO:0035811;GO:0035812;GO:0036359;GO:0042393;GO:0042393;GO:0045944;GO:0045944;GO:0046872;GO:2001161;GO:0003014;GO:0005634;GO:0007588;GO:0010765;GO:0031491;GO:0031491;GO:0031491;GO:0035811;GO:0035812;GO:0036359;GO:0042393;GO:0042393;GO:0042393;GO:0045944;GO:0045944;GO:0046872;GO:2001161;	K23588	-	S	1CTEY;0UPXX;12PIA;1AVAJ;0V8AM;KOG0956;0DIPX;09XCE;18Z4X	myeloid/lymphoid or mixed-lineage leukemia; translocated to, 6 [Source:MGI Symbol;Acc:MGI:1935145]	246198	B1AR09;Q3UPK1
ENSMUSG00000041827	15358.2	86.1161	30630.2	355.685	8.47446	7.89912e-76	1.15885e-73	5	115061299	115075974	+	2608	Oasl1	GO:0002376;GO:0003677;GO:0003677;GO:0003723;GO:0003725;GO:0003725;GO:0003725;GO:0005634;GO:0005654;GO:0005654;GO:0005730;GO:0005730;GO:0005737;GO:0005737;GO:0005829;GO:0005829;GO:0009615;GO:0009615;GO:0016020;GO:0016779;GO:0045071;GO:0045071;GO:0045087;GO:0051607;GO:0051607;GO:0051607;GO:0051607;GO:0060700;GO:0002376;GO:0003677;GO:0003677;GO:0003723;GO:0003725;GO:0003725;GO:0003725;GO:0005634;GO:…	K14608	-	J;O	0DF4M;0V4TK;1CP6T;1947B;KOG0001;1B0SC;09TUC;12QYV;0UGA6	2'-5' oligoadenylate synthetase-like 1 [Source:MGI Symbol;Acc:MGI:2180849]	231655	Q8VI94
ENSMUSG00000062585	394.149	777.089	11.2087	0.0144239	-6.11539	1.1076e-75	1.60914e-73	4	135622705	135647518	+	3982	Cnr2	GO:0004930;GO:0004930;GO:0004930;GO:0004930;GO:0004949;GO:0004949;GO:0004949;GO:0005515;GO:0005737;GO:0005783;GO:0005783;GO:0005886;GO:0005886;GO:0006954;GO:0007165;GO:0007186;GO:0007186;GO:0007186;GO:0007189;GO:0016020;GO:0016021;GO:0016021;GO:0019222;GO:0019233;GO:0030425;GO:0030425;GO:0030595;GO:0031234;GO:0032229;GO:0032496;GO:0033004;GO:0038171;GO:0042995;GO:0043005;GO:0043025;GO:0043204;GO:…	K04278	-	T	KOG3656;0DQQU;1CSW9;1B4TR;0A2UB;0VDYB;13JGT;191ZZ;0USZR	cannabinoid receptor 2 (macrophage) [Source:MGI Symbol;Acc:MGI:104650]	12802	P47936
ENSMUSG00000028525	4341.38	75.1719	8607.58	114.505	6.83927	3.71657e-75	5.34757e-73	4	101944740	102464456	+	10560	Pde4b	GO:0000930;GO:0001780;GO:0004114;GO:0004114;GO:0004115;GO:0004115;GO:0004115;GO:0004115;GO:0004115;GO:0004115;GO:0005515;GO:0005634;GO:0005634;GO:0005737;GO:0005813;GO:0005829;GO:0005829;GO:0005891;GO:0006198;GO:0006198;GO:0007165;GO:0007165;GO:0008021;GO:0008081;GO:0009408;GO:0014069;GO:0016020;GO:0016787;GO:0030018;GO:0030552;GO:0030552;GO:0030593;GO:0032729;GO:0032729;GO:0032743;GO:0032743;GO:…	K13293	EC:3.1.4.53	T	0UHKN;1ATCI;1CUW1;0DK28;18ZRC;0V756;12PR9;09W6Y;KOG3689	phosphodiesterase 4B, cAMP specific [Source:MGI Symbol;Acc:MGI:99557]	18578	Q8VBU5;B1AWD0
ENSMUSG00000047344	235.185	1.7909	468.579	261.644	8.03146	5.07806e-75	7.23696e-73	X	9066141	9134324	+	3991	Lancl3	GO:0003674;GO:0005886;GO:0005975;	-	-	V	0UQB8;193A9;0A22S;1AWXS;1CZYC;12PT2;0VCY6;0DQUM;KOG2787	LanC lantibiotic synthetase component C-like 3 (bacterial) [Source:MGI Symbol;Acc:MGI:2443335]	236285	Q8CD19
ENSMUSG00000031799	14479.9	2614.51	26345.3	10.0765	3.33293	8.03997e-75	1.135e-72	8	72884018	72906986	+	4269	Tpm4	GO:0001725;GO:0002102;GO:0003779;GO:0005737;GO:0005737;GO:0005856;GO:0005884;GO:0006936;GO:0007015;GO:0015629;GO:0015629;GO:0015629;GO:0030863;GO:0042802;GO:0042802;GO:0042802;GO:0042803;GO:0042803;GO:0042803;GO:0046872;GO:0046982;GO:0046982;GO:0046982;GO:0051015;GO:0051015;GO:0051015;GO:0051015;GO:0003779;GO:0005856;	K10375	-	Z	0V7TQ;KOG1003;0UMIG;1B2EJ;0DJ35;09XR3;194SA;1CTUZ;12RF9	tropomyosin 4 [Source:MGI Symbol;Acc:MGI:2449202]	326618	Q6IRU2
ENSMUSG00000037752	852.523	94.0331	1611.01	17.1324	4.09866	1.94547e-74	2.72075e-72	4	132452208	132459857	-	4312	Xkr8	GO:0002513;GO:0003674;GO:0005886;GO:0005886;GO:0005886;GO:0005886;GO:0006915;GO:0016020;GO:0016020;GO:0016021;GO:0016021;GO:0043652;GO:0043652;GO:0043652;GO:0043652;GO:0051649;GO:0070782;GO:0070782;GO:0070782;GO:0070782;GO:1902742;	-	-	S	0DKBX;13MKS;KOG4790;1CV5T;191DX;0V9UG;1ASX4;09YWR;0UP9C	X-linked Kx blood group related 8 [Source:MGI Symbol;Acc:MGI:2685877]	381560	Q8C0T0
ENSMUSG00000034522	391.022	770.196	11.8476	0.0153826	-6.02256	2.11515e-74	2.93065e-72	14	65595838	65636379	+	4733	Zfp395	GO:0000978;GO:0000978;GO:0000987;GO:0001228;GO:0003677;GO:0003700;GO:0005634;GO:0005634;GO:0005654;GO:0005737;GO:0005829;GO:0006357;GO:0006357;GO:0045944;GO:0000978;GO:0000978;GO:0000978;GO:0000987;GO:0000987;GO:0001228;GO:0001228;GO:0003677;GO:0003677;GO:0003700;GO:0005634;GO:0005634;GO:0005634;GO:0005654;GO:0005654;GO:0005737;GO:0005737;GO:0005829;GO:0005829;GO:0006357;GO:0006357;GO:0016607;GO:…	-	-	S	0II8D;13MGV;0UHCQ;1CS5Q;1B2JM;18UNX;0DHFJ;09W6B;0V74N	zinc finger protein 395 [Source:MGI Symbol;Acc:MGI:2682318]	380912	E9Q5N9
ENSMUSG00000053113	10055.9	23.0589	20088.8	871.194	9.76685	3.17547e-74	4.35943e-72	11	117856905	117860873	-	2891	Socs3	GO:0001784;GO:0001932;GO:0005515;GO:0005515;GO:0005737;GO:0005829;GO:0005942;GO:0007165;GO:0007259;GO:0007259;GO:0009968;GO:0009968;GO:0016567;GO:0035556;GO:0035556;GO:0040008;GO:0042532;GO:0042532;GO:0043066;GO:0043551;GO:0045595;GO:0045597;GO:0046426;GO:0046426;GO:0046627;GO:0046854;GO:0046935;GO:0050728;GO:0060670;GO:0060674;GO:0060707;GO:0060708;GO:1990830;	K04696	-	T	0DS95;191EU;0A4T3;KOG4566;13IYN;0VFMZ;1CZRN;1AX90;0UR4C	suppressor of cytokine signaling 3 [Source:MGI Symbol;Acc:MGI:1201791]	12702	O35718
ENSMUSG00000036528	3409.66	565.647	6253.67	11.0558	3.46673	4.5027e-74	6.12531e-72	7	107194414	107347790	+	10876	Ppfibp2	GO:0007528;GO:0042802;GO:0042802;GO:0042802;GO:0048786;GO:0050808;GO:0098793;GO:0098793;	-	-	S;T	18V68;0V4E3;1CPFT;1AVZC;0UPZ4;09TF1;0DES3;KOG1899;13H7T	PTPRF interacting protein, binding protein 2 (liprin beta 2) [Source:MGI Symbol;Acc:MGI:894649]	19024	O35711;G3X957
ENSMUSG00000040033	5832.12	858.402	10805.8	12.5883	3.65401	4.63162e-74	6.24392e-72	10	128106428	128128718	+	5926	Stat2	GO:0003677;GO:0003677;GO:0003700;GO:0005515;GO:0005634;GO:0005634;GO:0005737;GO:0006355;GO:0007165;GO:0001932;GO:0003677;GO:0003677;GO:0003700;GO:0005634;GO:0005634;GO:0005737;GO:0005829;GO:0005886;GO:0006355;GO:0007165;GO:0042802;GO:0044389;GO:0051607;GO:0060337;GO:0090140;	K11221	-	K	09VSF;1B4K1;KOG3667;0UTZZ;0V6RF;0DH0Y;13KI3;1CRR8;1924Q	signal transducer and activator of transcription 2 [Source:MGI Symbol;Acc:MGI:103039]	20847	Q9QXJ2
ENSMUSG00000037242	36185.5	6641.3	65729.7	9.89712	3.30701	5.21068e-74	6.96184e-72	4	134941280	135000125	-	6572	Clic4	GO:0001525;GO:0001525;GO:0001886;GO:0005244;GO:0005254;GO:0005254;GO:0005254;GO:0005515;GO:0005634;GO:0005634;GO:0005737;GO:0005737;GO:0005737;GO:0005739;GO:0005739;GO:0005739;GO:0005739;GO:0005813;GO:0005813;GO:0005829;GO:0005829;GO:0005886;GO:0005886;GO:0005886;GO:0005902;GO:0005902;GO:0005911;GO:0005911;GO:0006811;GO:0006821;GO:0006821;GO:0007035;GO:0009566;GO:0009986;GO:0009986;GO:0015630;GO:…	K05024	-	P	KOG1422;13HTJ;0DKFR;0V9Y1;1B595;1CRYR;0UIAQ;18ZDF;09Z0K	chloride intracellular channel 4 (mitochondrial) [Source:MGI Symbol;Acc:MGI:1352754]	29876	Q9QYB1;Q543N5
ENSMUSG00000032724	568.891	8.10929	1129.67	139.306	7.12211	2.51659e-73	3.33259e-71	2	103396655	103548768	+	6032	Abtb2	GO:0005654;GO:0046982;GO:0097237;	K10521	-	S	0DIVS;09XIB;0UMHV;1B0U1;1CYQE;0IESM;12X6N;0V8GG;18TJ2	ankyrin repeat and BTB (POZ) domain containing 2 [Source:MGI Symbol;Acc:MGI:2139365]	99382	Q7TQI7;Q3T9J9
ENSMUSG00000028214	285.928	7.26189	564.594	77.7475	6.28073	2.69618e-73	3.53909e-71	4	11704457	11714752	+	2104	Gem	GO:0000166;GO:0000278;GO:0000278;GO:0000287;GO:0000287;GO:0003924;GO:0003924;GO:0003924;GO:0003924;GO:0005246;GO:0005515;GO:0005525;GO:0005525;GO:0005525;GO:0005525;GO:0005525;GO:0005634;GO:0005886;GO:0005886;GO:0007165;GO:0009898;GO:0009898;GO:0016020;GO:0016020;GO:0019003;GO:0019003;GO:0030496;GO:0030496;GO:0051233;GO:0051233;GO:0051276;GO:0051276;GO:0051310;GO:0051310;GO:0072686;GO:0072686;GO:…	K07846	-	S;J	0V6AT;0UJ7H;1B2QB;09VBH;192GX;12RPT;KOG0395;1CR9U;0DGJZ	GTP binding protein (gene overexpressed in skeletal muscle) [Source:MGI Symbol;Acc:MGI:99844]	14579	P55041;Q3TH76
ENSMUSG00000052837	9178.08	1509.67	16846.5	11.1591	3.48014	4.66621e-73	6.07175e-71	8	85701113	85705347	-	2301	Junb	GO:0000785;GO:0000977;GO:0000978;GO:0000978;GO:0000981;GO:0001228;GO:0001570;GO:0001649;GO:0001701;GO:0001829;GO:0003677;GO:0003677;GO:0003677;GO:0003690;GO:0003700;GO:0003700;GO:0005515;GO:0005515;GO:0005515;GO:0005515;GO:0005634;GO:0005634;GO:0005654;GO:0005654;GO:0005667;GO:0006355;GO:0006355;GO:0006357;GO:0006357;GO:0006366;GO:0008134;GO:0009987;GO:0030316;GO:0033687;GO:0035976;GO:0035976;GO:…	K09028	-	K	09T5A;0UH63;0V440;12UA8;1B1P9;KOG0837;19555;1CP64;0DEGF	jun B proto-oncogene [Source:MGI Symbol;Acc:MGI:96647]	16477	P09450;Q569U6
ENSMUSG00000015312	4124.19	719.878	7528.5	10.458	3.38654	5.18833e-73	6.69294e-71	10	80765907	80768038	+	1589	Gadd45b	GO:0000185;GO:0000185;GO:0000186;GO:0005515;GO:0005515;GO:0005634;GO:0005634;GO:0005634;GO:0005737;GO:0005737;GO:0006469;GO:0006915;GO:0007275;GO:0030154;GO:0043065;GO:0046330;GO:0051726;GO:0051726;GO:0051726;GO:1900745;GO:0005634;GO:0051726;	K04402	-	T;D	09Y9G;0IH6M;1B4GI;0UNF1;13P0G;0DJNU;0V96X;18ZHH;1CUFR	growth arrest and DNA-damage-inducible 45 beta [Source:MGI Symbol;Acc:MGI:107776]	17873	P22339
ENSMUSG00000026360	1440.94	2685.08	196.805	0.0732958	-3.77013	1.04248e-72	1.3333e-70	1	143875076	143879899	-	3627	Rgs2	GO:0001965;GO:0001965;GO:0001975;GO:0005096;GO:0005096;GO:0005096;GO:0005096;GO:0005515;GO:0005634;GO:0005634;GO:0005634;GO:0005730;GO:0005737;GO:0005737;GO:0005737;GO:0005737;GO:0005829;GO:0005829;GO:0005829;GO:0005886;GO:0005886;GO:0005886;GO:0005886;GO:0006417;GO:0007049;GO:0007186;GO:0007283;GO:0007420;GO:0008277;GO:0008277;GO:0008277;GO:0009898;GO:0009898;GO:0009898;GO:0009968;GO:0010519;GO:…	K18154	-	T	18WT3;0DMVA;1CWQX;0VB4N;0UR2N;1B319;13HZP;KOG3589;0A08R	regulator of G-protein signaling 2 [Source:MGI Symbol;Acc:MGI:1098271]	19735	O08849
ENSMUSG00000024529	1412.77	199.509	2626.04	13.1625	3.71837	2.63523e-72	3.34183e-70	18	52649139	52662939	-	4778	Lox	GO:0001568;GO:0001649;GO:0001932;GO:0004720;GO:0004720;GO:0004720;GO:0004720;GO:0004720;GO:0005507;GO:0005507;GO:0005507;GO:0005507;GO:0005515;GO:0005515;GO:0005518;GO:0005518;GO:0005518;GO:0005576;GO:0005581;GO:0005615;GO:0005615;GO:0005615;GO:0005615;GO:0005615;GO:0005634;GO:0005634;GO:0007507;GO:0009725;GO:0009725;GO:0010468;GO:0016202;GO:0016491;GO:0016641;GO:0017015;GO:0018057;GO:0018057;GO:…	K00277	EC:1.4.3.13	O;W	0DKQN;0VA5U;1CVJ5;13KN2;0IHTH;195CU;0UJBD;09Z8H;1AUUF	lysyl oxidase [Source:MGI Symbol;Acc:MGI:96817]	16948	P28301;Q3TXH3;Q3TP83
ENSMUSG00000022122	400.757	23.5481	777.967	33.0373	5.04602	7.65146e-72	9.62155e-70	14	104052061	104081838	-	4266	Ednrb	GO:0000122;GO:0000122;GO:0000122;GO:0001755;GO:0001934;GO:0001934;GO:0004930;GO:0004930;GO:0004962;GO:0004962;GO:0004962;GO:0004962;GO:0005515;GO:0005886;GO:0005886;GO:0005886;GO:0005886;GO:0006885;GO:0007165;GO:0007186;GO:0007186;GO:0007186;GO:0007200;GO:0007200;GO:0007204;GO:0007204;GO:0007422;GO:0007497;GO:0007568;GO:0008217;GO:0008217;GO:0008217;GO:0008284;GO:0008284;GO:0014043;GO:0014070;GO:…	K04198	-	T	KOG3656;1CT9Q;0URCD;0A0GH;0DN3M;13I7S;18TF7;1AZ5R;0VBCQ	endothelin receptor type B [Source:MGI Symbol;Acc:MGI:102720]	13618	P48302
ENSMUSG00000048911	1134.2	93.118	2175.29	23.3605	4.546	1.4165e-71	1.76638e-69	2	131139984	131194812	-	6801	Rnf24	GO:0000139;GO:0005794;GO:0005794;GO:0005794;GO:0005794;GO:0008270;GO:0012505;GO:0016020;GO:0016021;GO:0016567;GO:0046872;GO:0061630;GO:0000139;GO:0005794;GO:0005794;GO:0005794;GO:0008270;GO:0012505;GO:0016020;GO:0016021;GO:0016567;GO:0046872;GO:0061630;GO:0000139;GO:0005794;GO:0005794;GO:0005794;GO:0008270;GO:0012505;GO:0016020;GO:0016021;GO:0016567;GO:0046872;GO:0061630;	-	-	O	18YCC;KOG0800;0DRYA;0URMU;1D172;0A4F2;0VF9Z;1B1JK;13QDC	ring finger protein 24 [Source:MGI Symbol;Acc:MGI:1261771]	51902	Q8BGI1;Q4VA59
ENSMUSG00000038332	1143.67	2141.71	145.63	0.0679971	-3.87838	1.82749e-71	2.26004e-69	10	41685931	41784420	+	3982	Sesn1	GO:0001650;GO:0005634;GO:0005634;GO:0005654;GO:0005737;GO:0005737;GO:0034198;GO:0042149;GO:0061700;GO:0070728;GO:0072593;GO:0098869;GO:1901031;GO:1904262;GO:0001650;GO:0005515;GO:0005634;GO:0005634;GO:0005634;GO:0005654;GO:0005737;GO:0005737;GO:0005737;GO:0016239;GO:0016491;GO:0016684;GO:0030308;GO:0031932;GO:0034198;GO:0034198;GO:0042149;GO:0051896;GO:0055114;GO:0061700;GO:0061700;GO:0061700;GO:…	K10141	-	S;J	KOG3746;09WFN;0V7E5;0DH5Z;0UP10;12PWZ;1AVAE;18WBI;1CUY2	sestrin 1 [Source:MGI Symbol;Acc:MGI:2155278]	140742	P58006
ENSMUSG00000035697	3173.2	5800.3	546.103	0.0941508	-3.40888	2.88642e-71	3.54036e-69	10	79852487	79867306	+	4478	Arhgap45	GO:0005096;GO:0007165;GO:0035556;GO:0043547;GO:0005096;GO:0007165;GO:0035556;GO:0043547;GO:0005096;GO:0005096;GO:0005737;GO:0005886;GO:0007165;GO:0016020;GO:0032587;GO:0035556;GO:0042995;GO:0046872;GO:0090630;	K20644	-	T	18TVQ;0DFUM;1ASYC;12NSS;0V5I7;KOG1453;0UHAR;1CQI1;09UIZ	Rho GTPase activating protein 45 [Source:MGI Symbol;Acc:MGI:1917969]	70719	Q3TBD2;G3X9Q3
ENSMUSG00000075254	559.224	52.019	1066.43	20.5008	4.3576	5.04855e-70	6.142e-68	16	33504740	33591946	+	12728	Heg1	GO:0005509;GO:0007043;GO:0007507;GO:0016020;GO:0016021;GO:0005509;GO:0007043;GO:0007507;GO:0016020;GO:0016021;GO:0001570;GO:0001701;GO:0001885;GO:0001886;GO:0001944;GO:0001945;GO:0003017;GO:0003209;GO:0003222;GO:0003281;GO:0005509;GO:0005515;GO:0005515;GO:0005886;GO:0005911;GO:0005911;GO:0007043;GO:0007275;GO:0007507;GO:0007507;GO:0007507;GO:0009791;GO:0009897;GO:0009986;GO:0016020;GO:0016021;GO:…	K24472	-	T	09VDQ;1AT9A;0UHNM;13K4J;1CRC3;0V6CP;18T46;0IJZT;0DGN8	heart development protein with EGF-like domains 1 [Source:MGI Symbol;Acc:MGI:1924696]	77446	E9Q440;Q6DFX1
ENSMUSG00000058427	67045.1	46.1877	134044	2902.16	11.5029	5.15084e-70	6.2159e-68	5	91051730	91053797	+	2068	Cxcl2	GO:0005125;GO:0005576;GO:0005576;GO:0005615;GO:0006935;GO:0006935;GO:0006952;GO:0006955;GO:0007165;GO:0008009;GO:0060326;GO:0001975;GO:0002237;GO:0005125;GO:0005576;GO:0005576;GO:0005615;GO:0005615;GO:0005615;GO:0005615;GO:0006935;GO:0006935;GO:0006952;GO:0006954;GO:0006954;GO:0006955;GO:0007165;GO:0007204;GO:0007204;GO:0008009;GO:0008009;GO:0008009;GO:0008009;GO:0009408;GO:0010332;GO:0030593;GO:…	K05505	-	S;W	0DVJX;1D4WZ;0J3WE;1B6Q4;0VKBQ;13XHT;0A9A4;0UWC6	chemokine (C-X-C motif) ligand 2 [Source:MGI Symbol;Acc:MGI:1340094]	20310	P10889;Q3U1J5
ENSMUSG00000026399	450	22.9956	877.005	38.138	5.25316	8.63846e-70	1.03413e-67	1	130366764	130390481	-	4853	Cd55	GO:0001618;GO:0002376;GO:0004857;GO:0005886;GO:0005886;GO:0006958;GO:0008289;GO:0009897;GO:0009986;GO:0016020;GO:0016324;GO:0030449;GO:0030450;GO:0031225;GO:0043086;GO:0045087;GO:0045121;GO:0045916;GO:0046718;GO:1903659;	K04006	-	S;W	1AXRU;12TPM;09YR6;0UP2C;1935J;1CUZJ;0DK5R;0V9P3;0IEGQ	CD55 molecule, decay accelerating factor for complement [Source:MGI Symbol;Acc:MGI:104850]	13136	Q61475
ENSMUSG00000002871	1306.76	2429.86	183.652	0.0755813	-3.72583	1.05141e-69	1.24867e-67	6	88879233	88889220	+	4171	Tpra1	GO:0005886;GO:0016020;GO:0016021;GO:0040016;GO:1901991;GO:0005886;GO:0016020;GO:0016021;GO:0040016;GO:1901991;GO:0016020;GO:0016021;GO:0016020;GO:0016021;GO:0005886;GO:0016020;GO:0016021;GO:0040016;GO:1901991;GO:0016020;GO:0016021;GO:0016020;GO:0016021;GO:0016020;GO:0016021;GO:0016020;GO:0016021;	K22988	-	S	0DPZW;13IUE;0VDEY;1B31Y;0URY8;KOG4536;192PA;1CQ1H;09X98	transmembrane protein, adipocyte asscociated 1 [Source:MGI Symbol;Acc:MGI:1345190]	24100	Q99MU1
ENSMUSG00000033066	7327.22	580.396	14074	24.249	4.59986	1.4812e-69	1.74525e-67	11	67345917	67579816	+	11688	Gas7	-	K18618	-	Z;O;D	1BBMD;0B6PI;KOG0940;197I5;KOG2398;0E9PU;0V3ZP;13GJE;0WJEW;1DGIE	growth arrest specific 7 [Source:MGI Symbol;Acc:MGI:1202388]	14457	Q3U432;Q3U8N2
ENSMUSG00000024754	1922.31	215.81	3628.82	16.8149	4.07167	5.47296e-69	6.39823e-67	19	21755706	21835724	+	8520	Cemip2	GO:0001525;GO:0004415;GO:0004415;GO:0004415;GO:0005509;GO:0005509;GO:0005509;GO:0005886;GO:0005886;GO:0005886;GO:0005887;GO:0005887;GO:0005887;GO:0007275;GO:0008152;GO:0016020;GO:0016021;GO:0016787;GO:0016798;GO:0030214;GO:0030214;GO:0030214;GO:0043231;GO:0043231;GO:1903670;GO:0001525;GO:0004415;GO:0004415;GO:0005509;GO:0005509;GO:0005886;GO:0005886;GO:0005887;GO:0005887;GO:0007275;GO:0008152;GO:…	K22144	EC:3.2.1.35	S	0V9F4;1AU2R;0UQAV;1CUR8;12SC1;09YCH;0DJXS;19009;0IFCM	cell migration inducing hyaluronidase 2 [Source:MGI Symbol;Acc:MGI:1890373]	83921	Q5FWI3;Q8BS93
ENSMUSG00000008855	1083.36	2022.56	144.16	0.0712758	-3.81044	1.4359e-68	1.66564e-66	11	102085258	102120992	-	8780	Hdac5	GO:0000118;GO:0000118;GO:0004407;GO:0004407;GO:0005634;GO:0005634;GO:0005737;GO:0006325;GO:0006325;GO:0016575;GO:0016787;GO:0032041;GO:0040029;GO:0046872;GO:0070932;GO:0000118;GO:0000118;GO:0000122;GO:0000976;GO:0000978;GO:0001085;GO:0003682;GO:0004407;GO:0004407;GO:0004407;GO:0005080;GO:0005634;GO:0005634;GO:0005634;GO:0005634;GO:0005737;GO:0005737;GO:0005737;GO:0005794;GO:0005829;GO:0006325;GO:…	K11406	EC:3.5.1.98	B	KOG1343;0DH82;0UM1F;0V6W3;09URG;1AXXP;1CRY6;12P3Q;18YWB	histone deacetylase 5 [Source:MGI Symbol;Acc:MGI:1333784]	15184	Q3UJF1;Q6P9T4
ENSMUSG00000030162	225.226	3.45294	446.999	129.455	7.0163	1.69665e-68	1.95297e-66	6	129462207	129484128	-	3572	Olr1	GO:0002376;GO:0005041;GO:0005041;GO:0005576;GO:0005654;GO:0005886;GO:0005886;GO:0005886;GO:0006897;GO:0006954;GO:0006954;GO:0006954;GO:0007155;GO:0007159;GO:0007159;GO:0008219;GO:0008219;GO:0010629;GO:0016020;GO:0016021;GO:0019897;GO:0030246;GO:0042157;GO:0042157;GO:0042802;GO:0043231;GO:0043235;GO:0043235;GO:0045121;GO:0016020;GO:0016021;	K08763	-	T;V	0DNWZ;12TI6;1CXUC;0V9C3;192NW;1B4JU;KOG4297;0A199;0US90	oxidized low density lipoprotein (lectin-like) receptor 1 [Source:MGI Symbol;Acc:MGI:1261434]	108078	Q9EQ09
ENSMUSG00000004105	1439.01	2710.17	167.839	0.0619291	-4.01324	2.25974e-68	2.58128e-66	2	33106081	33137729	+	6286	Angptl2	GO:0001525;GO:0005102;GO:0005576;GO:0005615;GO:0005615;GO:0062023;	-	-	S;T;E	0DH5X;1B35P;1CRW5;13DWM;0V6W2;0UNZ8;KOG2579;09VXJ;18XZR	angiopoietin-like 2 [Source:MGI Symbol;Acc:MGI:1347002]	26360	Q9R045
ENSMUSG00000066677	196.059	1.14006	390.977	342.945	8.42183	1.32726e-67	1.50463e-65	1	173501241	173525961	+	5258	Ifi208	GO:0000122;GO:0000978;GO:0001227;GO:0002218;GO:0003690;GO:0003690;GO:0005634;GO:0005654;GO:0005730;GO:0005829;GO:0008134;GO:0035458;GO:0035458;GO:0042802;GO:0000122;GO:0000978;GO:0001227;GO:0002218;GO:0003690;GO:0003690;GO:0005634;GO:0005654;GO:0005730;GO:0005829;GO:0008134;GO:0035458;GO:0035458;GO:0042802;	-	-	S	1D9G6;0AIGV;0UYUS;0VVZA;130S3;0E16W;0KEIM	interferon activated gene 208 [Source:MGI Symbol;Acc:MGI:2442822]	100033459	Q3V3Q4
ENSMUSG00000030315	593.91	1135.14	52.6781	0.0464066	-4.42952	1.45496e-67	1.63699e-65	6	114837589	114946955	-	5396	Vgll4	GO:0001223;GO:0005515;GO:0005515;GO:0005634;GO:0006355;GO:0030178;GO:0030178;GO:0030308;GO:0030308;GO:0035331;GO:0035331;GO:0045892;GO:0045892;GO:0060044;GO:1903364;GO:0006355;GO:0006355;	-	-	K	0IFGD;0DKYM;1AZNQ;12T7D;0UMXZ;18VFN;0VAD4;09ZG2;1CVTJ	vestigial like family member 4 [Source:MGI Symbol;Acc:MGI:2652840]	232334	Q80V24
ENSMUSG00000028270	6776.54	35.9884	13517.1	375.596	8.55304	1.68995e-67	1.88719e-65	3	142326363	142343769	+	2516	Gbp2	GO:0000139;GO:0000166;GO:0003924;GO:0003924;GO:0003924;GO:0005525;GO:0005525;GO:0005525;GO:0005634;GO:0005654;GO:0005737;GO:0005737;GO:0005794;GO:0005794;GO:0005829;GO:0009617;GO:0015629;GO:0016020;GO:0016787;GO:0020005;GO:0031410;GO:0031410;GO:0034504;GO:0035458;GO:0042803;GO:0042832;GO:0042832;GO:0044406;GO:0048471;GO:0048471;GO:0050830;GO:0050830;GO:0071222;GO:0071346;GO:0071346;GO:0003924;GO:…	K20897	-	S;O;T;D;C;K	1AVYD;0UI2K;0V9BC;134KU;09XSJ;KOG2037;1CUKV;0DJTQ;194H1	guanylate binding protein 2 [Source:MGI Symbol;Acc:MGI:102772]	14469	Q9Z0E6
ENSMUSG00000048216	554.058	36.2832	1071.83	29.5408	4.88464	2.76521e-67	3.06508e-65	6	13834457	13839941	-	4083	Gpr85	GO:0004930;GO:0004930;GO:0004930;GO:0005783;GO:0005783;GO:0005783;GO:0005886;GO:0005886;GO:0005886;GO:0005886;GO:0005887;GO:0007165;GO:0007186;GO:0007186;GO:0016020;GO:0016021;GO:0016021;GO:0004930;GO:0004930;GO:0004930;GO:0005783;GO:0005783;GO:0005886;GO:0005886;GO:0005886;GO:0005887;GO:0007165;GO:0007186;GO:0007186;GO:0016020;GO:0016021;GO:0016021;GO:0004930;GO:0004930;GO:0004930;GO:0005783;GO:…	K04302	-	T	KOG3656;13KZQ;191EN;09Z3W;0VA1A;1B1AT;1CVDU;0URDJ;0DKJJ	G protein-coupled receptor 85 [Source:MGI Symbol;Acc:MGI:1927851]	64450	P60894;Q6ZWR2
ENSMUSG00000010358	833.962	80.87	1587.05	19.6247	4.2946	3.35928e-66	3.6962e-64	11	101339233	101349524	+	1727	Ifi35	GO:0002281;GO:0002281;GO:0003674;GO:0005615;GO:0005615;GO:0005634;GO:0005634;GO:0005634;GO:0005634;GO:0005737;GO:0005737;GO:0005829;GO:0005829;GO:0008150;GO:0008285;GO:0008285;GO:0016020;GO:0016020;GO:0034145;GO:0034145;GO:0042802;GO:0042802;GO:0045089;GO:0045089;GO:0050729;GO:0050729;GO:1901223;GO:1901223;GO:1901224;	-	-	S	0DSJT;18XJ2;0VFDU;0A55W;1CQNF;13TTM;0UM6N;0IZG7;1AWNB	interferon-induced protein 35 [Source:MGI Symbol;Acc:MGI:1917360]	70110	Q9D8C4
ENSMUSG00000032788	2058.33	3754.65	362.016	0.0964181	-3.37455	8.04581e-66	8.75075e-64	10	78272578	78300809	-	5397	Pdxk	GO:0000166;GO:0000287;GO:0005524;GO:0005524;GO:0005654;GO:0005737;GO:0005829;GO:0005829;GO:0008270;GO:0008478;GO:0008478;GO:0008478;GO:0008478;GO:0009443;GO:0009443;GO:0009443;GO:0016301;GO:0016310;GO:0016740;GO:0030170;GO:0030955;GO:0031402;GO:0031403;GO:0036094;GO:0042803;GO:0042823;GO:0043066;GO:0046872;GO:0070280;	K00868	EC:2.7.1.35	H	09X8K;1CTAX;0V879;12QTC;KOG2599;0UM4Y;0DIK4;1ARR7;18UV0	pyridoxal (pyridoxine, vitamin B6) kinase [Source:MGI Symbol;Acc:MGI:1351869]	216134	Q8K183
ENSMUSG00000015340	49341.6	10032	88651.2	8.83682	3.14353	8.07006e-66	8.75075e-64	X	9301491	9354010	-	5808	Cybb	GO:0005244;GO:0005515;GO:0005515;GO:0005635;GO:0005635;GO:0005737;GO:0005737;GO:0005739;GO:0005783;GO:0005783;GO:0005791;GO:0005791;GO:0005794;GO:0005794;GO:0005886;GO:0005886;GO:0005886;GO:0005886;GO:0005887;GO:0006801;GO:0006801;GO:0006811;GO:0006952;GO:0006954;GO:0007584;GO:0009055;GO:0016020;GO:0016020;GO:0016021;GO:0016175;GO:0016175;GO:0016491;GO:0016491;GO:0020037;GO:0022900;GO:0030425;GO:…	K21421	EC:1.-.-.-	Q;C;P	1CSAS;0V6AP;1AVA4;KOG0039;12P7E;09VBE;0DHKF;18WB9;0UJTA	cytochrome b-245, beta polypeptide [Source:MGI Symbol;Acc:MGI:88574]	13058	Q61093;Q3U6G0
ENSMUSG00000050390	1928.21	3519.97	336.454	0.0955844	-3.38708	2.07684e-65	2.23581e-63	4	129113371	129155197	-	5770	C77080	GO:0003674;GO:0005575;GO:0030154;GO:0003674;GO:0005575;GO:0030154;GO:0003674;GO:0005575;GO:0030154;	-	-	S	1B283;18VVI;0IMX5;0UUQ6;0A4WU;13JZ3;0VFRG;1CW11;0DSBW	expressed sequence C77080 [Source:MGI Symbol;Acc:MGI:2140651]	97130	A2A7S8
ENSMUSG00000027698	6128.14	10993.1	1263.22	0.114911	-3.12141	3.37684e-65	3.60936e-63	3	27237114	27338757	+	5253	Nceh1	GO:0005783;GO:0005886;GO:0006470;GO:0006629;GO:0006805;GO:0016020;GO:0016020;GO:0016021;GO:0016021;GO:0016042;GO:0016787;GO:0016787;GO:0016787;GO:0017171;GO:0042301;GO:0043231;GO:0046485;GO:0052689;GO:0060395;GO:0016787;	K14349	EC:3.1.1.-	V	0UMWT;1B0GN;1CRN1;KOG1515;0V6N9;0DGXT;13KTG;1912D;09VPD	neutral cholesterol ester hydrolase 1 [Source:MGI Symbol;Acc:MGI:2443191]	320024	Q8BLF1
ENSMUSG00000042677	3667.78	730.997	6604.56	9.035	3.17553	9.62959e-65	1.02197e-62	4	125012216	125021633	-	2882	Zc3h12a	GO:0000294;GO:0000294;GO:0000932;GO:0000932;GO:0000932;GO:0001525;GO:0001933;GO:0002230;GO:0002230;GO:0002376;GO:0002757;GO:0002757;GO:0002757;GO:0003677;GO:0003677;GO:0003677;GO:0003682;GO:0003682;GO:0003682;GO:0003723;GO:0003723;GO:0003723;GO:0003729;GO:0003729;GO:0003729;GO:0003730;GO:0004518;GO:0004519;GO:0004521;GO:0004521;GO:0004532;GO:0004540;GO:0004540;GO:0004843;GO:0004843;GO:0004843;GO:…	K18668	EC:3.1.-.-	S;K	0UP7I;0DKIW;12RNG;KOG3777;1AYSW;09VCG;18WD5;0V6BM;1CVD0	zinc finger CCCH type containing 12A [Source:MGI Symbol;Acc:MGI:2385891]	230738	Q5D1E7
ENSMUSG00000020589	5116.04	1045.01	9187.08	8.79142	3.1361	1.15263e-64	1.21464e-62	12	12312140	12430966	+	12596	Cyria	GO:0003674;GO:0008150;GO:0016020;GO:0030833;GO:0003674;GO:0008150;GO:0016020;GO:0030833;GO:0003674;GO:0008150;GO:0016020;GO:0030833;	-	-	S	KOG3951;1956Z;09WCM;0DHMW;12N7E;0UJVE;1CSCB;1AVCD;0V7B3	CYFIP related Rac1 interactor A [Source:MGI Symbol;Acc:MGI:1261783]	76820	Q8BHZ0
ENSMUSG00000000555	14482.6	3112.14	25853.1	8.30719	3.05436	1.19426e-64	1.24972e-62	15	103252713	103275190	-	4933	Itga5	GO:0005154;GO:0005154;GO:0005178;GO:0005178;GO:0005515;GO:0005515;GO:0005515;GO:0005737;GO:0005737;GO:0005783;GO:0005794;GO:0005886;GO:0005886;GO:0005886;GO:0005911;GO:0005911;GO:0005925;GO:0005925;GO:0005925;GO:0007044;GO:0007155;GO:0007155;GO:0007155;GO:0007155;GO:0007155;GO:0007157;GO:0007159;GO:0007229;GO:0007229;GO:0007229;GO:0007229;GO:0007565;GO:0007613;GO:0008305;GO:0008305;GO:0008305;GO:…	K06484	-	W	1CP6D;09T5M;0V44B;0UFEM;190SD;KOG3637;12N24;1B1M0;0DEGR	integrin alpha 5 (fibronectin receptor alpha) [Source:MGI Symbol;Acc:MGI:96604]	16402	P11688;Q80YP5
ENSMUSG00000024663	1416.23	2601.27	231.18	0.0888719	-3.49213	1.46875e-64	1.52628e-62	19	9979033	10015744	+	7161	Rab3il1	GO:0005085;GO:0005085;GO:0005085;GO:0005085;GO:0006887;GO:0015031;GO:0019900;GO:0042802;GO:0050790;GO:0070319;GO:0005085;GO:0050790;GO:0005085;GO:0050790;GO:0005085;GO:0005085;GO:0005085;GO:0005085;GO:0006887;GO:0015031;GO:0019900;GO:0042802;GO:0050790;GO:0070319;GO:0005085;GO:0050790;GO:0005085;GO:0050790;GO:0005085;GO:0005085;GO:0005085;GO:0005085;GO:0006887;GO:0015031;GO:0019900;GO:0042802;GO:…	K16779	-	U	09WND;KOG4324;18SEM;1AU8G;0DHXZ;12R8Z;1CSNJ;0V7KY;0UKZT	RAB3A interacting protein (rabin3)-like 1 [Source:MGI Symbol;Acc:MGI:1922010]	74760	Q8VDV3
ENSMUSG00000024079	5133.97	590.988	9676.96	16.3742	4.03335	2.89416e-64	2.98677e-62	17	79159993	79190002	-	5113	Eif2ak2	GO:0000166;GO:0000186;GO:0000186;GO:0001819;GO:0002376;GO:0003723;GO:0003725;GO:0004672;GO:0004672;GO:0004672;GO:0004672;GO:0004674;GO:0004694;GO:0004694;GO:0004713;GO:0004715;GO:0005515;GO:0005515;GO:0005515;GO:0005524;GO:0005524;GO:0005634;GO:0005634;GO:0005737;GO:0005737;GO:0005829;GO:0006412;GO:0006468;GO:0006468;GO:0009615;GO:0009615;GO:0009636;GO:0010998;GO:0016301;GO:0016310;GO:0016740;GO:…	K16195	EC:2.7.11.1	J;K	0A4UA;1D0IE;0DRCV;18USK;1B1A6;0V9PP;0UQIK;KOG1033;13MHE	eukaryotic translation initiation factor 2-alpha kinase 2 [Source:MGI Symbol;Acc:MGI:1353449]	19106	Q03963
ENSMUSG00000034957	3967.79	7134.38	801.204	0.112302	-3.15455	3.29128e-64	3.37334e-62	7	34818718	34821353	+	2636	Cebpa	GO:0000050;GO:0000122;GO:0000785;GO:0000976;GO:0000976;GO:0000978;GO:0000978;GO:0000978;GO:0000981;GO:0000981;GO:0001163;GO:0001228;GO:0001228;GO:0001228;GO:0001228;GO:0001889;GO:0001889;GO:0001892;GO:0003677;GO:0003677;GO:0003682;GO:0003700;GO:0003700;GO:0003700;GO:0003700;GO:0005515;GO:0005515;GO:0005515;GO:0005634;GO:0005634;GO:0005634;GO:0005654;GO:0005654;GO:0005654;GO:0005667;GO:0005667;GO:…	K09055	-	K	0UQS9;193T6;13MUP;1B0J0;0DM32;KOG3119;09ZJS;1CVPC;0VAGH	CCAAT/enhancer binding protein (C/EBP), alpha [Source:MGI Symbol;Acc:MGI:99480]	12606	P53566
ENSMUSG00000013846	9145.95	1963.29	16328.6	8.31698	3.05606	1.05745e-63	1.07644e-61	15	66974724	67048679	-	6851	St3gal1	GO:0002319;GO:0003836;GO:0003836;GO:0003836;GO:0005576;GO:0005794;GO:0006054;GO:0006468;GO:0006486;GO:0006486;GO:0006486;GO:0006487;GO:0008373;GO:0010706;GO:0010706;GO:0010706;GO:0016020;GO:0016021;GO:0016740;GO:0016757;GO:0032580;GO:0032588;GO:0032588;GO:0032588;GO:0097503;GO:1905403;GO:1990675;GO:1990675;GO:1990675;GO:1990676;GO:1990676;GO:1990676;GO:1990743;GO:1990743;GO:1990743;GO:0002319;GO:…	K00780	EC:2.4.99.4	G	0V77R;18T6Q;0DKMB;1CVFS;13IB8;0UPM5;KOG2692;0A20A;1AYNE	ST3 beta-galactoside alpha-2,3-sialyltransferase 1 [Source:MGI Symbol;Acc:MGI:98304]	20442	P54751;Q544T4
ENSMUSG00000052397	4834.23	998.451	8670	8.68346	3.11827	1.1113e-63	1.12361e-61	17	7005440	7050183	-	3290	Ezr	GO:0000122;GO:0000122;GO:0001650;GO:0001650;GO:0001726;GO:0001726;GO:0001772;GO:0001772;GO:0001931;GO:0001951;GO:0003376;GO:0003376;GO:0003779;GO:0003779;GO:0003779;GO:0005515;GO:0005515;GO:0005515;GO:0005737;GO:0005737;GO:0005737;GO:0005768;GO:0005768;GO:0005829;GO:0005829;GO:0005856;GO:0005856;GO:0005884;GO:0005884;GO:0005884;GO:0005886;GO:0005886;GO:0005886;GO:0005886;GO:0005902;GO:0005902;GO:…	K08007	-	Z;S;T	0DIN7;KOG3529;1AWPD;0UIIU;0V7TS;18XKD;1CTD4;12RFB;09W3R	ezrin [Source:MGI Symbol;Acc:MGI:98931]	22350	P26040;Q4KML7;Q8CBU4;Q3UL48
ENSMUSG00000039959	1848.61	3366.1	331.117	0.098368	-3.34567	1.21211e-63	1.21732e-61	5	135435385	135573974	-	12961	Hip1	GO:0003779;GO:0003779;GO:0005515;GO:0005543;GO:0005634;GO:0005737;GO:0005737;GO:0005737;GO:0005794;GO:0005794;GO:0006897;GO:0006897;GO:0006915;GO:0006915;GO:0006915;GO:0006915;GO:0006919;GO:0006919;GO:0006919;GO:0007015;GO:0012505;GO:0016020;GO:0030136;GO:0030136;GO:0030136;GO:0030136;GO:0030136;GO:0030154;GO:0030276;GO:0030276;GO:0030276;GO:0030276;GO:0030665;GO:0031234;GO:0031234;GO:0031410;GO:…	K04559	-	Z;K	KOG0980;0V94Q;18ZSA;1CUDE;0UU01;09Y76;0DHKB;130S5;1AS9S	huntingtin interacting protein 1 [Source:MGI Symbol;Acc:MGI:1099804]	215114	Q8VD75
ENSMUSG00000046982	1542.33	270.688	2813.97	10.3956	3.3779	1.44576e-63	1.44229e-61	18	84029752	84105831	-	5848	Tshz1	GO:0000981;GO:0003677;GO:0003677;GO:0003677;GO:0005515;GO:0005634;GO:0005634;GO:0006357;GO:0007275;GO:0009952;GO:0010468;GO:0042474;GO:0046872;GO:0060023;GO:0003677;GO:0003677;GO:0005634;GO:0010468;GO:0046872;	K09236	-	K	18ZPY;0UJW2;1AYSG;1CSCW;13HV8;09WD7;0DHNF;0IJEQ;0V7BM	teashirt zinc finger family member 1 [Source:MGI Symbol;Acc:MGI:1346031]	110796	Q5DTH5
ENSMUSG00000045980	988.623	1879.17	98.0803	0.0521935	-4.25999	1.85732e-63	1.84059e-61	11	115078313	115137849	+	4610	Tmem104	GO:0016020;GO:0016021;GO:0003674;GO:0005575;GO:0008150;GO:0016020;GO:0016021;	-	-	S	KOG3832;0DEFA;0VDF4;1AXF9;0A1XI;1CZ81;18TCM;0UT0J;13D4D	transmembrane protein 104 [Source:MGI Symbol;Acc:MGI:2444222]	320534	Q3TB48
ENSMUSG00000033581	2128.11	404.693	3851.52	9.51714	3.25053	3.55568e-63	3.50047e-61	16	21877759	21982049	-	7402	Igf2bp2	GO:0003676;GO:0003723;GO:0003723;GO:0003729;GO:0003729;GO:0003730;GO:0003730;GO:0003730;GO:0005634;GO:0005634;GO:0005634;GO:0005737;GO:0005737;GO:0005737;GO:0005829;GO:0005829;GO:0005856;GO:0005856;GO:0006417;GO:0007399;GO:0010468;GO:0048027;GO:0048027;GO:0051028;GO:0051252;GO:0003676;GO:0003723;GO:0003723;GO:0003729;GO:0005634;GO:0051028;	K17392	-	A;K	1B09U;12QIR;0UNKW;0V8ED;1CTJ6;KOG2193;09XGB;0DITV;195UX	insulin-like growth factor 2 mRNA binding protein 2 [Source:MGI Symbol;Acc:MGI:1890358]	319765	Q5SF07
ENSMUSG00000045092	1624.49	2963.28	285.698	0.0964127	-3.37463	4.82932e-63	4.72326e-61	3	115504082	115508721	-	3046	S1pr1	GO:0001525;GO:0001525;GO:0001525;GO:0001664;GO:0001664;GO:0001955;GO:0003245;GO:0003376;GO:0003376;GO:0003376;GO:0003376;GO:0004930;GO:0004930;GO:0004930;GO:0004930;GO:0004930;GO:0005654;GO:0005654;GO:0005737;GO:0005768;GO:0005886;GO:0005886;GO:0005901;GO:0006935;GO:0007165;GO:0007186;GO:0007186;GO:0007186;GO:0007186;GO:0007189;GO:0007193;GO:0007193;GO:0007420;GO:0008284;GO:0009897;GO:0016020;GO:…	K04288	-	T	13190;0DENT;1ARQ6;09TH0;0IIA7;1916J;1CPCM;0V4G0;0UFVA	sphingosine-1-phosphate receptor 1 [Source:MGI Symbol;Acc:MGI:1096355]	13609	O08530
ENSMUSG00000063450	1073.56	171.909	1975.21	11.4898	3.52229	5.16336e-63	5.01718e-61	12	75864908	76157700	+	26726	Syne2	GO:0003779;GO:0005635;GO:0034993;GO:0051015;GO:0003779;GO:0005634;GO:0005635;GO:0005640;GO:0016020;GO:0016021;GO:0016021;GO:0034993;GO:0051015;GO:0003779;GO:0005515;GO:0005634;GO:0005634;GO:0005634;GO:0005635;GO:0005635;GO:0005635;GO:0005635;GO:0005635;GO:0005640;GO:0005654;GO:0005737;GO:0005737;GO:0005737;GO:0005739;GO:0005739;GO:0005739;GO:0005856;GO:0005886;GO:0005925;GO:0005925;GO:0006998;GO:…	K19346	-	Z	1CWVG;09UB4;0UR7S;0V5A9;191MY;1AXTW;12UBG;KOG0516;0DFKT	spectrin repeat containing, nuclear envelope 2 [Source:MGI Symbol;Acc:MGI:2449316]	319565	Q6ZWQ0
ENSMUSG00000043157	1376.21	2521.86	230.547	0.0914191	-3.45136	7.12629e-63	6.87986e-61	14	61547202	61549385	+	2184	Arl11	GO:0000166;GO:0002244;GO:0005525;GO:0005525;GO:0005525;GO:0005886;GO:0006886;GO:0016192;GO:0000166;GO:0002244;GO:0005525;GO:0005525;GO:0005525;GO:0005886;GO:0006886;GO:0016192;	K07959	-	U	0UPWF;1CW3V;0DM8P;1ATRG;KOG0070;0VAM9;09XKW;195YG;13QQ3	ADP-ribosylation factor-like 11 [Source:MGI Symbol;Acc:MGI:2444054]	219144	Q6P3A9
ENSMUSG00000047747	569.44	1081.65	57.2278	0.0529077	-4.24038	8.27055e-63	7.93337e-61	8	83589985	83817897	+	17242	Rnf150	GO:0005737;GO:0006511;GO:0016020;GO:0016021;GO:0016567;GO:0046872;GO:0061630;	-	-	O	1CV47;KOG0800;1B34Y;194Q8;0DKA8;09YV7;13KB3;0V9T0;0UN3X	ring finger protein 150 [Source:MGI Symbol;Acc:MGI:2443860]	330812	Q5DTZ6
ENSMUSG00000005043	531.999	1014	49.9958	0.0493054	-4.34211	9.13516e-63	8.70691e-61	11	119234251	119246362	-	4414	Sgsh	GO:0005515;GO:0005539;GO:0005764;GO:0006027;GO:0006027;GO:0008449;GO:0008484;GO:0016250;GO:0016250;GO:0030200;GO:0030200;GO:0030201;GO:0003824;GO:0005515;GO:0005539;GO:0005764;GO:0005764;GO:0006027;GO:0006027;GO:0006027;GO:0008449;GO:0008484;GO:0008484;GO:0016250;GO:0016250;GO:0016250;GO:0016787;GO:0030200;GO:0030200;GO:0030200;GO:0030201;GO:0003824;GO:0005515;GO:0005539;GO:0005764;GO:0006027;GO:…	K01565	EC:3.10.1.1	G	1AXMW;0DKQB;0VA5I;18YKU;0UTAF;1CVIW;09Z87;KOG3867;12RSM	N-sulfoglucosamine sulfohydrolase (sulfamidase) [Source:MGI Symbol;Acc:MGI:1350341]	27029	Q9EQ08;Q3URR4
ENSMUSG00000024953	8966.52	1900.52	16032.5	8.43585	3.07653	1.63756e-62	1.55091e-60	19	6884065	6887474	-	2139	Prdx5	GO:0004601;GO:0005782;GO:0016209;GO:0016491;GO:0016491;GO:0055114;GO:0098869;GO:0001016;GO:0004601;GO:0004601;GO:0005102;GO:0005102;GO:0005515;GO:0005634;GO:0005737;GO:0005737;GO:0005737;GO:0005739;GO:0005739;GO:0005739;GO:0005777;GO:0005777;GO:0005777;GO:0005782;GO:0005782;GO:0005829;GO:0006915;GO:0006979;GO:0006979;GO:0008379;GO:0008379;GO:0016209;GO:0016209;GO:0016480;GO:0016491;GO:0016491;GO:…	K11187	EC:1.11.1.24	O;K	0A4PF;13RBC;0VFII;0UGV2;KOG0541;18W7F;1AZKY;1D1EU;0DS1M	peroxiredoxin 5 [Source:MGI Symbol;Acc:MGI:1859821]	54683	P99029
ENSMUSG00000041782	550.959	0	1101.92	Inf	Inf	1.69428e-62	1.59454e-60	1	135746336	135761080	+	3400	Lad1	GO:0005198;GO:0005576;GO:0005604;GO:0015629;GO:0015629;	-	-	S	0A27U;0VD3Q;0UNZN;0DPVZ;1CYVF;1AYHZ;0IIRJ;18WMH;13R1N	ladinin [Source:MGI Symbol;Acc:MGI:109343]	16763	P57016
ENSMUSG00000028268	6010.63	16.544	12004.7	725.624	9.50308	1.84868e-62	1.72898e-60	3	142265787	142278970	+	3265	Gbp3	GO:0003924;GO:0005525;GO:0000139;GO:0000166;GO:0003924;GO:0003924;GO:0003924;GO:0005525;GO:0005525;GO:0005525;GO:0005634;GO:0005634;GO:0005737;GO:0005794;GO:0005794;GO:0005829;GO:0005886;GO:0016020;GO:0016787;GO:0020005;GO:0031410;GO:0031410;GO:0035458;GO:0042803;GO:0042832;GO:0042832;GO:0044406;GO:0048471;GO:0048471;GO:0050830;GO:0050830;GO:0071346;GO:0071346;GO:0003924;GO:0005525;GO:0000139;GO:…	K20899	-	S;O;T;D;C;K	191WI;0V9BC;134KU;09XSJ;1AYRV;KOG2037;1CUKV;0UNNF;0DJTQ	guanylate binding protein 3 [Source:MGI Symbol;Acc:MGI:1926263]	55932	Q61107
ENSMUSG00000026827	5392.32	546.587	10238.1	18.7309	4.22735	2.24619e-62	2.0877e-60	2	57127647	57260731	+	6549	Gpd2	GO:0004367;GO:0004368;GO:0004368;GO:0005509;GO:0005739;GO:0005739;GO:0005739;GO:0005743;GO:0005743;GO:0006072;GO:0006072;GO:0006094;GO:0006734;GO:0009331;GO:0009331;GO:0016020;GO:0016491;GO:0016491;GO:0019563;GO:0035264;GO:0043010;GO:0046872;GO:0052590;GO:0052591;GO:0055114;GO:0055114;GO:0004368;GO:0004368;GO:0005509;GO:0005739;GO:0005739;GO:0006072;GO:0006072;GO:0009331;GO:0009331;GO:0016491;GO:…	K00111	EC:1.1.5.3	C	0DJQJ;1B005;09YAY;12R1Y;KOG0042;1CUHJ;18T86;0V6XB;0UNHD	glycerol phosphate dehydrogenase 2, mitochondrial [Source:MGI Symbol;Acc:MGI:99778]	14571	Q64521
ENSMUSG00000026821	3457.31	717.843	6196.78	8.63251	3.10978	7.49616e-62	6.92423e-60	2	28403137	28443093	+	6345	Ralgds	GO:0005085;GO:0005085;GO:0007264;GO:0050790;GO:0005085;GO:0005085;GO:0005515;GO:0005515;GO:0005634;GO:0005634;GO:0005737;GO:0005829;GO:0005903;GO:0007165;GO:0007264;GO:0030695;GO:0050790;GO:0005085;GO:0005085;GO:0007165;GO:0007264;GO:0050790;GO:0005085;GO:0005085;GO:0007165;GO:0007264;GO:0050790;GO:0005085;GO:0005085;GO:0007165;GO:0007264;GO:0050790;GO:0005085;GO:0005085;GO:0007264;GO:0050790;GO:…	K08732	-	T	1ATHD;1CTFJ;09XD2;0DIQG;0V8B2;KOG3629;0UQIW;12RJ9;18WBG	ral guanine nucleotide dissociation stimulator [Source:MGI Symbol;Acc:MGI:107485]	19730	Q03385;Q6ZPU1
ENSMUSG00000050022	1141.41	2099.89	182.936	0.087117	-3.5209	8.78336e-62	8.06345e-60	5	140709882	140747194	+	6697	Amz1	GO:0005575;GO:0006508;GO:0006508;GO:0008233;GO:0008233;GO:0008237;GO:0008237;GO:0016787;GO:0046872;GO:0005575;GO:0006508;GO:0006508;GO:0008233;GO:0008233;GO:0008237;GO:0008237;GO:0016787;GO:0046872;	K06974	EC:3.4.-.-	S;O	0DRMV;18UPR;0IVMN;1CYZB;0UTFM;13NP1;1B06H;0VF51;0A5PZ	archaelysin family metallopeptidase 1 [Source:MGI Symbol;Acc:MGI:2442258]	231842	Q8BVF9;A1L312;Q3UTF6
ENSMUSG00000019850	21923.9	1061.75	42786.1	40.2978	5.33263	1.09981e-61	1.00351e-59	10	18876658	18891405	-	7226	Tnfaip3	GO:0001922;GO:0002020;GO:0002020;GO:0002237;GO:0002237;GO:0002237;GO:0002315;GO:0002632;GO:0002634;GO:0002637;GO:0002677;GO:0003677;GO:0003677;GO:0003824;GO:0004842;GO:0004842;GO:0004842;GO:0004843;GO:0004843;GO:0004843;GO:0004843;GO:0005515;GO:0005515;GO:0005515;GO:0005515;GO:0005634;GO:0005634;GO:0005634;GO:0005634;GO:0005737;GO:0005737;GO:0005737;GO:0005764;GO:0006508;GO:0006915;GO:0006954;GO:…	K11859	EC:3.4.19.12	T;K	13DPS;0WHDR;0IQZK;1979D;0B4UY;0V39Z;1DFG3;1BB3R;0E8HZ	tumor necrosis factor, alpha-induced protein 3 [Source:MGI Symbol;Acc:MGI:1196377]	21929	Q60769;Q7TQD1
ENSMUSG00000020190	1600.46	3017.77	183.145	0.0606888	-4.04243	1.17862e-61	1.0689e-59	10	80501161	80513946	-	3892	Mknk2	GO:0000166;GO:0004672;GO:0004674;GO:0004674;GO:0004674;GO:0004683;GO:0005515;GO:0005516;GO:0005524;GO:0005524;GO:0005524;GO:0005524;GO:0005634;GO:0005634;GO:0005654;GO:0005654;GO:0005737;GO:0005737;GO:0006417;GO:0006468;GO:0006468;GO:0006468;GO:0006468;GO:0006915;GO:0009931;GO:0016301;GO:0016310;GO:0016604;GO:0016604;GO:0016605;GO:0016740;GO:0018105;GO:0030097;GO:0030097;GO:0035556;GO:0035556;GO:…	K04372	EC:2.7.11.1	T	0DQME;0V4QQ;KOG0607;1AUY7;09TRD;1CZV2;0UP54;194ED;12NBZ	MAP kinase-interacting serine/threonine kinase 2 [Source:MGI Symbol;Acc:MGI:894279]	17347	Q8CDB0;Q3TPM2
ENSMUSG00000060012	2442.29	4400.02	484.568	0.110129	-3.18274	1.79231e-61	1.61567e-59	14	64884714	65047066	+	13017	Kif13b	GO:0000166;GO:0003774;GO:0003777;GO:0003777;GO:0005524;GO:0005524;GO:0005737;GO:0005829;GO:0005871;GO:0005874;GO:0005902;GO:0007018;GO:0007018;GO:0008017;GO:0008017;GO:0016887;GO:0019901;GO:0030424;GO:0033270;GO:0050770;GO:0071889;GO:0000166;GO:0003774;GO:0003777;GO:0003777;GO:0005515;GO:0005524;GO:0005524;GO:0005737;GO:0005829;GO:0005871;GO:0005874;GO:0005902;GO:0007018;GO:0007018;GO:0008017;GO:…	K17914	-	Z	1CUEV;1B0HR;0UJWR;0V8TH;KOG0245;0DJN0;09Y8U;18YFX;12QSJ	kinesin family member 13B [Source:MGI Symbol;Acc:MGI:1098265]	16554	E9Q4K7
ENSMUSG00000066152	4313.8	786.836	7840.77	9.96493	3.31686	3.67427e-61	3.29232e-59	4	62180799	62216648	+	2033	Slc31a2	GO:0005375;GO:0005375;GO:0006811;GO:0006825;GO:0006878;GO:0016020;GO:0016021;GO:0016021;GO:0035434;GO:0005375;GO:0005375;GO:0005515;GO:0005770;GO:0005886;GO:0006811;GO:0006825;GO:0006878;GO:0006878;GO:0006878;GO:0016020;GO:0016020;GO:0016021;GO:0016021;GO:0035434;GO:0035434;GO:0055037;GO:1902311;GO:0005375;GO:0005375;GO:0006811;GO:0006825;GO:0006878;GO:0016020;GO:0016021;GO:0016021;GO:0035434;	K14687	-	P	13S8I;1B1KG;0DUCW;KOG3386;0UVJE;0A7KI;0VIEY;1D3QK;1934E	solute carrier family 31, member 2 [Source:MGI Symbol;Acc:MGI:1333844]	20530	Q9CPU9;Q4KL43
ENSMUSG00000089809	15246.9	3491.14	27002.6	7.73462	2.95133	5.8268e-61	5.19002e-59	5	99365285	99876924	-	13805	Rasgef1b	GO:0005085;GO:0005085;GO:0005085;GO:0005768;GO:0005769;GO:0005770;GO:0007264;GO:0030496;GO:0050790;GO:0005085;GO:0005085;GO:0005085;GO:0005768;GO:0005769;GO:0005770;GO:0007264;GO:0030496;GO:0050790;GO:0005085;GO:0005085;GO:0007264;GO:0050790;GO:0005085;GO:0005085;GO:0007264;GO:0050790;GO:0005085;GO:0005085;GO:0005085;GO:0005768;GO:0005769;GO:0005770;GO:0007264;GO:0030496;GO:0050790;	-	-	T	0UJ9K;1B04T;09UFQ;0DFRD;18SC2;KOG3541;13KPK;0V5F3;KOG3417;1CQEY	RasGEF domain family, member 1B [Source:MGI Symbol;Acc:MGI:2443755]	320292	Q8JZL7
ENSMUSG00000118607	421.397	39.9633	802.83	20.0892	4.32835	7.31789e-61	6.47958e-59	1	85454323	85479899	+	2798	Gm7592	GO:0003674;GO:0004930;GO:0004930;GO:0005575;GO:0005634;GO:0007186;GO:0007186;GO:0008150;GO:0016020;GO:0016021;GO:0016021;GO:0003674;GO:0004930;GO:0004930;GO:0005575;GO:0007186;GO:0007186;GO:0008150;GO:0016020;GO:0016021;GO:0016021;	-	-	-	-	predicted gene 7592 [Source:MGI Symbol;Acc:MGI:3644077]	101055758	-
ENSMUSG00000026390	17108.9	826.487	33391.4	40.4016	5.33634	7.84572e-61	6.90608e-59	1	120402267	120432753	-	1925	Marco	GO:0001540;GO:0001664;GO:0001664;GO:0001664;GO:0001934;GO:0002376;GO:0005044;GO:0005581;GO:0005737;GO:0005886;GO:0005886;GO:0005886;GO:0005886;GO:0006897;GO:0006897;GO:0006897;GO:0006898;GO:0006911;GO:0007193;GO:0016020;GO:0016020;GO:0016021;GO:0038024;GO:0043277;GO:0045087;GO:0070374;GO:0097242;GO:0016020;GO:0016021;	K13884	-	T;U	18Y2U;09ZMZ;1CW0U;0DM5Q;1B49R;0IHK7;0UPR3;0VAIN;13N6N	macrophage receptor with collagenous structure [Source:MGI Symbol;Acc:MGI:1309998]	17167	Q60754;A2RT24
ENSMUSG00000046223	3735.48	799.612	6671.35	8.34323	3.06061	8.102e-61	7.08996e-59	7	24161909	24175393	+	2617	Plaur	GO:0001934;GO:0001934;GO:0005102;GO:0005102;GO:0005515;GO:0005576;GO:0005886;GO:0005886;GO:0005886;GO:0005886;GO:0005887;GO:0009986;GO:0009986;GO:0016020;GO:0016021;GO:0019899;GO:0019899;GO:0019904;GO:0019904;GO:0030162;GO:0030377;GO:0031225;GO:0034112;GO:0034112;GO:0038195;GO:0043066;GO:0043066;GO:0043388;GO:0043388;GO:0045742;GO:0045742;GO:0048762;GO:0060742;GO:0090200;GO:0090200;GO:2001243;GO:…	K03985	-	T	18SAP;0VDEG;0UTFT;1B369;13PEG;1CZ7C;0DFNR;0A2IM;0IJ50	plasminogen activator, urokinase receptor [Source:MGI Symbol;Acc:MGI:97612]	18793	P35456;Q545X5
ENSMUSG00000023947	3940.24	251.597	7628.89	30.3218	4.92228	2.9465e-60	2.56345e-58	17	45866629	45874095	+	3045	Nfkbie	GO:0001650;GO:0005515;GO:0005654;GO:0005737;GO:0005794;GO:0005829;GO:0042942;GO:0045892;GO:0048471;GO:0001650;GO:0005654;GO:0005794;GO:0005829;GO:0042942;GO:0048471;	K05872	-	K;E	0UQCI;0DQII;KOG0504;0VC0J;13M39;1CZKX;18W50;0A2AC;1AV6R	nuclear factor of kappa light polypeptide gene enhancer in B cells inhibitor, epsilon [Source:MGI Symbol;Acc:MGI:1194908]	18037	O54910
ENSMUSG00000018395	1785.99	3228.46	343.526	0.106405	-3.23236	6.4503e-60	5.57932e-58	11	53458206	53492794	+	3586	Kif3a	GO:0000166;GO:0003774;GO:0003777;GO:0005524;GO:0005524;GO:0005874;GO:0007018;GO:0008017;GO:0000166;GO:0001701;GO:0001822;GO:0001947;GO:0003341;GO:0003777;GO:0003777;GO:0005515;GO:0005515;GO:0005515;GO:0005515;GO:0005524;GO:0005524;GO:0005737;GO:0005813;GO:0005814;GO:0005814;GO:0005829;GO:0005856;GO:0005871;GO:0005874;GO:0005874;GO:0005876;GO:0005929;GO:0005929;GO:0005930;GO:0007018;GO:0007018;GO:…	K10394	-	Z	0DFD2;1CQ2S;0UIV4;18XR1;0V4YP;12NHW;KOG0240;09TZU;1AUC0	kinesin family member 3A [Source:MGI Symbol;Acc:MGI:107689]	16568	P28741;Q3UF02
ENSMUSG00000022529	4982.45	1114.21	8850.69	7.94348	2.98977	1.81284e-59	1.55904e-57	16	3561957	3568654	+	4521	Zfp263	GO:0000122;GO:0000122;GO:0000785;GO:0000978;GO:0000981;GO:0001227;GO:0001227;GO:0003677;GO:0005634;GO:0006355;GO:0006357;GO:0043565;GO:0043565;GO:0045944;GO:0045944;GO:0046872;GO:1990837;GO:1990837;GO:0000122;GO:0000785;GO:0000978;GO:0000981;GO:0001227;GO:0005634;GO:0006357;GO:0043565;GO:1990837;GO:0000122;GO:0000785;GO:0000978;GO:0000981;GO:0001227;GO:0006357;GO:0043565;GO:1990837;	K09229	-	K	1CW8C;0VAR7;0DMD3;18SKB;1B54A;KOG1721;13KP2;0UQJ5;09ZUN	zinc finger protein 263 [Source:MGI Symbol;Acc:MGI:1921370]	74120	Q8CF60
ENSMUSG00000025314	17472	4113.02	30830.9	7.49593	2.90611	1.95513e-59	1.67181e-57	2	90260098	90410991	-	8352	Ptprj	GO:0004721;GO:0004725;GO:0004725;GO:0006470;GO:0016020;GO:0016021;GO:0016311;GO:0016787;GO:0016791;GO:0035335;GO:0004721;GO:0004725;GO:0004725;GO:0006470;GO:0016020;GO:0016021;GO:0016311;GO:0016787;GO:0016791;GO:0035335;GO:0004721;GO:0004725;GO:0004725;GO:0006470;GO:0016020;GO:0016021;GO:0016311;GO:0016787;GO:0016791;GO:0035335;	K05698	EC:3.1.3.48	T	0UPWR;1B0CY;12NH8;KOG0791;09U1T;0V50R;0DNZ0;1CXWE;18T42	protein tyrosine phosphatase, receptor type, J [Source:MGI Symbol;Acc:MGI:104574]	19271	Q64455;E9Q4S7
ENSMUSG00000034265	697.967	1302.59	93.3436	0.0716599	-3.80269	4.88166e-59	4.15052e-57	17	5542832	5804086	+	3078	Zdhhc14	GO:0000139;GO:0005783;GO:0005783;GO:0005783;GO:0005783;GO:0005789;GO:0005794;GO:0005794;GO:0006612;GO:0016020;GO:0016021;GO:0016409;GO:0016409;GO:0016409;GO:0016740;GO:0016746;GO:0018215;GO:0018230;GO:0018230;GO:0018230;GO:0018230;GO:0018345;GO:0018345;GO:0019706;GO:0019706;	K16675	EC:2.3.1.225	S;M	09WN1;1B1ST;0DHXJ;12Q0T;1903M;1CSNA;0V7KM;KOG1311;0UGXP	zinc finger, DHHC domain containing 14 [Source:MGI Symbol;Acc:MGI:2653229]	224454	Q8BQQ1
ENSMUSG00000060519	7223.07	915.49	13530.7	14.7797	3.88554	1.86451e-58	1.5763e-56	1	156481187	156501926	-	3892	Tor3a	GO:0005524;GO:0000166;GO:0005515;GO:0005524;GO:0005524;GO:0005635;GO:0005737;GO:0005783;GO:0005783;GO:0005783;GO:0005788;GO:0005788;GO:0005788;GO:0005788;GO:0016887;GO:0016887;GO:0016887;GO:0016887;GO:0005524;GO:0000166;GO:0005515;GO:0005524;GO:0005524;GO:0005635;GO:0005737;GO:0005783;GO:0005783;GO:0005788;GO:0005788;GO:0005788;GO:0016887;GO:0016887;GO:0016887;GO:0000166;GO:0005515;GO:0005524;GO:…	K23000	-	O	KOG2170;0UP3E;190BV;1B23X;1CVRQ;0A13M;13N66;0DKWG;0VBZV	torsin family 3, member A [Source:MGI Symbol;Acc:MGI:1353652]	30935	Q9ER38
ENSMUSG00000029570	527.413	996.216	58.6102	0.0588328	-4.08724	6.03036e-58	5.06957e-56	5	140593075	140601300	+	2505	Lfng	GO:0000139;GO:0000139;GO:0001541;GO:0001756;GO:0001756;GO:0002315;GO:0005794;GO:0007275;GO:0007386;GO:0007389;GO:0008375;GO:0008593;GO:0008593;GO:0014807;GO:0016020;GO:0016020;GO:0016021;GO:0016740;GO:0016757;GO:0016757;GO:0030173;GO:0030173;GO:0030217;GO:0032092;GO:0033829;GO:0033829;GO:0033829;GO:0033829;GO:0045747;GO:0046872;GO:0051446;GO:1902367;	K05948	EC:2.4.1.222	O;W;G	09XJB;0DHXV;12TPC;1CTN8;0II9W;0URR2;1AV7S;0V6XF;18YJJ	LFNG O-fucosylpeptide 3-beta-N- acetylglucosaminyltransferase [Source:MGI Symbol;Acc:MGI:1095413]	16848	O09010;B2RRW2
ENSMUSG00000020275	5497.7	747.353	10248	13.7124	3.77741	1.62746e-57	1.36052e-55	11	23686847	23720970	-	7466	Rel	GO:0000978;GO:0001228;GO:0003677;GO:0003700;GO:0003700;GO:0005634;GO:0005634;GO:0005634;GO:0005667;GO:0005737;GO:0005737;GO:0006355;GO:0007249;GO:0007249;GO:0010629;GO:0032688;GO:0043123;GO:0043565;GO:0045893;GO:0045944;GO:1901215;	K09254	-	K	0IG8F;1CPFA;1AT7E;09TEG;13E12;0UM6S;191F7;0DERH;0V4DN	reticuloendotheliosis oncogene [Source:MGI Symbol;Acc:MGI:97897]	19696	A4QPD3
ENSMUSG00000021670	3453.14	777.969	6128.32	7.87733	2.97771	1.66437e-57	1.38365e-55	13	96785475	96807444	-	7275	Hmgcr	GO:0004420;GO:0004420;GO:0004420;GO:0004420;GO:0005777;GO:0005778;GO:0005778;GO:0005778;GO:0005783;GO:0005783;GO:0005789;GO:0005789;GO:0005789;GO:0006629;GO:0006694;GO:0006695;GO:0006695;GO:0006695;GO:0006743;GO:0006743;GO:0007568;GO:0007584;GO:0008202;GO:0008203;GO:0008284;GO:0008284;GO:0008299;GO:0008299;GO:0008299;GO:0008299;GO:0008542;GO:0010664;GO:0010664;GO:0010666;GO:0010666;GO:0015936;GO:…	K00021	EC:1.1.1.34	I	12RVD;0DKU1;KOG2480;1CVNY;0V8UA;18Y05;0UNT4;1B51M;09ZBN	3-hydroxy-3-methylglutaryl-Coenzyme A reductase [Source:MGI Symbol;Acc:MGI:96159]	15357	Q01237;Q8BV96
ENSMUSG00000038459	3258.36	729.401	5787.33	7.93436	2.98811	1.87618e-57	1.55111e-55	7	83758564	83801101	-	4606	Abhd17c	GO:0002084;GO:0002084;GO:0002084;GO:0002084;GO:0005768;GO:0005886;GO:0005886;GO:0008474;GO:0008474;GO:0008474;GO:0008474;GO:0010008;GO:0014069;GO:0016020;GO:0016787;GO:0018215;GO:0030054;GO:0042995;GO:0043197;GO:0045202;GO:0045211;GO:0055038;GO:0098839;GO:0098978;GO:0098978;GO:0099175;GO:0099175;GO:0099175;GO:1902817;GO:1905668;	K01076	EC:3.1.2.22	S;O	0UHQ6;1CUAW;0V5HI;12NSC;195Y2;KOG1552;1B3FF;09UI8;0DFTZ	abhydrolase domain containing 17C [Source:MGI Symbol;Acc:MGI:1917428]	70178	Q8VCV1
ENSMUSG00000041936	3394.13	387.507	6400.75	16.5178	4.04595	2.86092e-57	2.35224e-55	4	156249747	156281945	-	9285	Agrn	GO:0005509;GO:0007275;GO:0016020;GO:0016021;GO:0030154;GO:0007275;GO:0016020;GO:0016021;GO:0030154;GO:0001932;GO:0001934;GO:0001934;GO:0002162;GO:0002162;GO:0005201;GO:0005509;GO:0005509;GO:0005509;GO:0005515;GO:0005576;GO:0005604;GO:0005615;GO:0005615;GO:0005796;GO:0005829;GO:0005886;GO:0005886;GO:0007009;GO:0007268;GO:0007275;GO:0007416;GO:0007528;GO:0007528;GO:0009887;GO:0009888;GO:0009986;GO:…	K06254	-	W	0V3XI;0B6HC;0E9K8;197H9;1DGF6;0WJ7Y;13G7P;1BBJW;0ITSI	agrin [Source:MGI Symbol;Acc:MGI:87961]	11603	-
ENSMUSG00000022372	1378.63	211.512	2545.75	12.036	3.58928	5.77213e-57	4.7199e-55	15	66652668	66703678	-	9186	Sla	GO:0004715;GO:0005102;GO:0005515;GO:0005737;GO:0005768;GO:0005925;GO:0007169;GO:0009966;GO:0030154;GO:0031234;GO:0038083;GO:0042127;GO:0043197;GO:0045087;GO:0004715;GO:0005102;GO:0005515;GO:0005737;GO:0005768;GO:0005925;GO:0007169;GO:0009966;GO:0030154;GO:0031234;GO:0038083;GO:0042127;GO:0043197;GO:0045087;GO:0004715;GO:0005102;GO:0005515;GO:0005737;GO:0005768;GO:0005925;GO:0007169;GO:0009966;GO:…	K23698	-	T	0V9ZD;0DP1N;1CXZG;19152;0UQUU;09Y8K;13KD6;0IFZ7;1AZ66	src-like adaptor [Source:MGI Symbol;Acc:MGI:104295]	20491	Q60898;Q4FJX0
ENSMUSG00000045817	3706.09	6560.59	851.58	0.129802	-2.94561	6.38134e-57	5.1897e-55	17	84491359	84495375	-	3530	Zfp36l2	GO:0000165;GO:0000288;GO:0003723;GO:0005634;GO:0005634;GO:0005737;GO:0005737;GO:0006402;GO:0007275;GO:0009611;GO:0009611;GO:0009611;GO:0030097;GO:0030097;GO:0033077;GO:0033077;GO:0035019;GO:0035925;GO:0035925;GO:0035925;GO:0043488;GO:0043488;GO:0043488;GO:0044344;GO:0044344;GO:0044344;GO:0045577;GO:0045599;GO:0046872;GO:0046872;GO:0048103;GO:0060216;GO:0061158;GO:0061158;GO:0061158;GO:0070371;GO:…	K18753	-	S;T	0UQCP;13RRI;0VD43;1B48X;0A287;0DRKE;KOG1677;1D0TP;191UE	zinc finger protein 36, C3H type-like 2 [Source:MGI Symbol;Acc:MGI:107945]	12193	P23949
ENSMUSG00000029366	2515.6	287.23	4743.97	16.5163	4.04582	7.37729e-57	5.96723e-55	5	88912855	88931140	+	3781	Dck	GO:0000166;GO:0000287;GO:0004136;GO:0004137;GO:0004137;GO:0004137;GO:0004138;GO:0005524;GO:0005524;GO:0005524;GO:0005634;GO:0005654;GO:0005654;GO:0005737;GO:0005739;GO:0005829;GO:0006139;GO:0006170;GO:0006220;GO:0006220;GO:0008144;GO:0009157;GO:0016301;GO:0016310;GO:0016740;GO:0019136;GO:0019136;GO:0032548;GO:0042803;GO:0046092;GO:0046939;	K00893	EC:2.7.1.74	F	KOG4235;0DGV8;1CRJA;1B00U;09VKP;18ZKC;0UQPN;0V6JU;12PCY	deoxycytidine kinase [Source:MGI Symbol;Acc:MGI:102726]	13178	P43346;Q545E8
ENSMUSG00000035235	785.992	128.947	1443.04	11.1909	3.48426	9.83629e-57	7.91345e-55	14	61835696	61843395	+	1650	Trim13	GO:0002376;GO:0003713;GO:0004842;GO:0004842;GO:0005737;GO:0005737;GO:0005783;GO:0005789;GO:0005789;GO:0005789;GO:0008270;GO:0010332;GO:0010332;GO:0010942;GO:0010942;GO:0016020;GO:0016021;GO:0016239;GO:0016239;GO:0016239;GO:0016239;GO:0016567;GO:0016567;GO:0016740;GO:0030433;GO:0030433;GO:0030433;GO:0030433;GO:0032897;GO:0032897;GO:0043123;GO:0043123;GO:0043123;GO:0043161;GO:0043161;GO:0043161;GO:…	K12003	EC:2.3.2.27	O	0KDQ8;14TXB	tripartite motif-containing 13 [Source:MGI Symbol;Acc:MGI:1913847]	66597	Q9CYB0;Q3TSD2
ENSMUSG00000048489	287.773	19.9969	555.55	27.7817	4.79607	1.65128e-56	1.32137e-54	6	116627570	116629755	+	1358	Depp1	GO:0003674;GO:0005737;GO:0005737;GO:0005737;GO:0005739;GO:0005739;GO:0005739;GO:0005739;GO:0005777;GO:0005777;GO:0005777;GO:0006914;GO:0010506;GO:0010506;GO:0010506;GO:0010506;GO:0043231;GO:0043231;GO:0003674;GO:0005737;GO:0005737;GO:0005739;GO:0005739;GO:0005739;GO:0005777;GO:0005777;GO:0006914;GO:0010506;GO:0010506;GO:0010506;GO:0043231;	-	-	S	1D3CM;0UT3V;13T3H;0IZM8;1B3DH;0VI1E;0A776;193Q7;0DU5F	DEPP1 autophagy regulator [Source:MGI Symbol;Acc:MGI:1918730]	213393	Q8K2F3
ENSMUSG00000003863	425.182	29.9648	820.4	27.3788	4.77499	2.10574e-56	1.67608e-54	7	44988546	45016443	-	7899	Ppfia3	GO:0001669;GO:0001669;GO:0003674;GO:0005737;GO:0005737;GO:0007269;GO:0007269;GO:0007269;GO:0016079;GO:0016081;GO:0031410;GO:0045202;GO:0048172;GO:0048172;GO:0048786;GO:0048786;GO:0050808;GO:0098831;GO:0098875;GO:0098875;GO:0098978;GO:0001669;GO:0001669;GO:0001669;GO:0003674;GO:0005737;GO:0005737;GO:0007269;GO:0007269;GO:0007269;GO:0016079;GO:0016081;GO:0031410;GO:0045202;GO:0048172;GO:0048172;GO:…	-	-	T	0DF0T;0V4PV;1AUMZ;0US7P;18VPC;09TQM;KOG0249;1CPQK;12NBM	protein tyrosine phosphatase, receptor type, f polypeptide (PTPRF), interacting protein (liprin), alpha 3 [Source:MGI Symbol;Acc:MGI:1924037]	76787	P60469;Q9CWF5
ENSMUSG00000046207	1336.91	263.323	2410.49	9.15412	3.19442	2.44388e-56	1.93493e-54	11	68393845	68443524	+	3622	Pik3r6	GO:0001525;GO:0005515;GO:0005737;GO:0005886;GO:0005942;GO:0005944;GO:0005944;GO:0007186;GO:0007186;GO:0016020;GO:0042269;GO:0043406;GO:0043406;GO:0043551;GO:0045582;GO:0045766;GO:0045766;GO:0046854;GO:0046934;GO:0046935;GO:0046935;GO:0046935;GO:0001525;GO:0005515;GO:0005737;GO:0005886;GO:0005942;GO:0005944;GO:0005944;GO:0007186;GO:0007186;GO:0016020;GO:0042269;GO:0042269;GO:0043406;GO:0043406;GO:…	K21290	-	S;T	0A1J7;18VKG;0UQK3;1ATI6;0VCEX;0DMDV;0ITTQ;13M63;1CW94	phosphoinositide-3-kinase regulatory subunit 5 [Source:MGI Symbol;Acc:MGI:2144613]	104709	Q3U6Q4
ENSMUSG00000015837	53308.5	13433.9	93183	6.93642	2.79419	2.8899e-56	2.27602e-54	11	50090193	50101654	-	3356	Sqstm1	GO:0000122;GO:0000407;GO:0000423;GO:0000423;GO:0000932;GO:0000932;GO:0001934;GO:0002376;GO:0003712;GO:0005080;GO:0005080;GO:0005080;GO:0005515;GO:0005515;GO:0005515;GO:0005634;GO:0005737;GO:0005737;GO:0005739;GO:0005764;GO:0005768;GO:0005770;GO:0005776;GO:0005776;GO:0005783;GO:0005829;GO:0005829;GO:0006914;GO:0006914;GO:0006915;GO:0007032;GO:0007032;GO:0007032;GO:0008270;GO:0016234;GO:0016235;GO:…	K14381	-	S;J;L;B	18SAQ;0DEQ5;0V4C0;0UFQF;09TCX;12TTI;1ARJP;1CPDW;KOG4582	sequestosome 1 [Source:MGI Symbol;Acc:MGI:107931]	18412	Q64337
ENSMUSG00000052609	351.713	677.775	25.6506	0.0378453	-4.72374	4.81613e-56	3.77322e-54	12	76577665	76627262	+	11727	Plekhg3	GO:0005085;GO:0005085;GO:0005575;GO:0050790;GO:0005085;GO:0005085;GO:0005575;GO:0050790;GO:0005085;GO:0050790;	K23859	-	T	1909Z;12PE9;09VAB;0V69K;0DGIP;1CR8G;KOG3518;0UICI;1B05A	pleckstrin homology domain containing, family G (with RhoGef domain) member 3 [Source:MGI Symbol;Acc:MGI:2388284]	263406	Q4VAC9
ENSMUSG00000040723	2278.68	333.767	4223.6	12.6543	3.66156	7.22416e-56	5.63033e-54	1	165474085	165537326	-	10131	Rcsd1	GO:0003009;GO:0005575;GO:0051015;GO:0071474;GO:0003009;GO:0005575;GO:0051015;GO:0051015;GO:0071474;GO:0071474;	K18615	-	S;T	1CXEF;0IKAV;191HI;0DHBZ;0V7G3;0URUS;13P19;1AVX2;09TAM	RCSD domain containing 1 [Source:MGI Symbol;Acc:MGI:2676394]	226594	Q3UZA1
ENSMUSG00000039934	3008.85	687.64	5330.06	7.75123	2.95443	7.34957e-56	5.69839e-54	5	21391253	21520130	+	10425	Gsap	GO:0001540;GO:0001540;GO:0001540;GO:0005794;GO:0005802;GO:0005802;GO:0005802;GO:0005802;GO:0030162;GO:0030162;GO:0030162;GO:1902004;GO:1902004;GO:1902004;GO:1902004;GO:0001540;GO:0001540;GO:0005794;GO:0005802;GO:0005802;GO:0005802;GO:0030162;GO:0030162;GO:1902004;GO:1902004;GO:1902004;	-	-	S;K	09TMX;1CPN3;0DEYD;1ARU0;0IG5Q;12RXV;0V4KZ;18SN1;0UG1D	gamma-secretase activating protein [Source:MGI Symbol;Acc:MGI:2442259]	212167	Q3TCV3
ENSMUSG00000027878	10474	2602.19	18345.9	7.05016	2.81766	1.29196e-55	9.9654e-54	3	97920843	98057677	+	10782	Notch2	GO:0000122;GO:0001501;GO:0001701;GO:0001709;GO:0001709;GO:0001889;GO:0001890;GO:0001947;GO:0002011;GO:0002315;GO:0002437;GO:0003184;GO:0003184;GO:0005509;GO:0005515;GO:0005515;GO:0005576;GO:0005634;GO:0005634;GO:0005634;GO:0005654;GO:0005654;GO:0005654;GO:0005737;GO:0005829;GO:0005886;GO:0005886;GO:0005886;GO:0005886;GO:0005887;GO:0005887;GO:0005887;GO:0005929;GO:0006355;GO:0006357;GO:0006959;GO:…	K20994	-	T;K	1BB5A;197AA;0B4ZZ;0WHJN;0E8ME;1DFJ6;0V3C0;0IR7G;13DX8	notch 2 [Source:MGI Symbol;Acc:MGI:97364]	18129	O35516
ENSMUSG00000036206	821.002	141.448	1500.56	10.6085	3.40715	2.92443e-55	2.24417e-53	1	88998137	89082790	+	5112	Sh3bp4	GO:0005092;GO:0005092;GO:0005092;GO:0005634;GO:0005737;GO:0005737;GO:0005737;GO:0005737;GO:0005905;GO:0006897;GO:0008285;GO:0008285;GO:0008285;GO:0010508;GO:0010508;GO:0010508;GO:0016020;GO:0030136;GO:0030308;GO:0030308;GO:0030308;GO:0031267;GO:0031267;GO:0031410;GO:0032007;GO:0032007;GO:0032007;GO:0032007;GO:0034260;GO:0034260;GO:0034260;GO:0042802;GO:0042802;GO:0050790;GO:0050790;GO:0050790;GO:…	K20066	-	T;U	12P27;09V12;0DGAE;1B1K0;191T7;0IEE9;0UI0H;0V60P;1CQZU	SH3-domain binding protein 4 [Source:MGI Symbol;Acc:MGI:2138297]	98402	Q921I6
ENSMUSG00000038866	3013.29	700.713	5325.88	7.60065	2.92612	4.28493e-55	3.27141e-53	1	105918136	105961804	+	6774	Zcchc2	GO:0003674;GO:0003676;GO:0005737;GO:0005737;GO:0008150;GO:0008270;GO:0035091;GO:0046872;GO:0003674;GO:0003676;GO:0005737;GO:0008150;GO:0008270;GO:0035091;GO:0046872;GO:0003676;GO:0008270;GO:0035091;	K22700	-	S;J;O;T	0A0WN;1CXF6;0IZZC;192BR;0URV6;0VBT4;12U3N;0DNHU;1AZ1X	zinc finger, CCHC domain containing 2 [Source:MGI Symbol;Acc:MGI:2444114]	227449	Q69ZB8
ENSMUSG00000020393	2114.09	469.759	3758.41	8.00072	3.00013	4.43702e-55	3.37033e-53	11	5141552	5211558	-	7722	Kremen1	GO:0003674;GO:0005886;GO:0006915;GO:0016020;GO:0016020;GO:0016021;GO:0016055;GO:0016055;GO:0030279;GO:0043025;GO:0048681;GO:0060173;GO:0090090;	K23091	-	O;T;G	0V3A2;0WHDY;1979F;1DFG7;0IR07;0E8I3;0B4V5;1BB3U;13DQD	kringle containing transmembrane protein 1 [Source:MGI Symbol;Acc:MGI:1933988]	84035	Q99N43
ENSMUSG00000063193	4583.3	8052.73	1113.88	0.138323	-2.85389	6.85203e-55	5.17847e-53	11	114813607	114825212	-	2917	Cd300lb	GO:0016020;GO:0016021;GO:0002376;GO:0002446;GO:0004888;GO:0005515;GO:0005886;GO:0005886;GO:0016020;GO:0016021;GO:0033005;GO:0071222;GO:0016020;GO:0016021;	K20395	-	-	-	CD300 molecule like family member B [Source:MGI Symbol;Acc:MGI:2685099]	217304	Q3U497;Q3TEQ8;A0A0R3P9D2
ENSMUSG00000045672	288.826	5.44039	572.211	105.178	6.71669	8.43132e-55	6.34001e-53	4	63132241	63253228	+	13022	Col27a1	GO:0003431;GO:0005201;GO:0005201;GO:0005201;GO:0005576;GO:0005581;GO:0005583;GO:0005615;GO:0030020;GO:0030198;GO:0030198;GO:0031012;GO:0046872;GO:0062023;	K19721	-	W	0V43J;1B282;0DJVB;09T4V;0UNQ0;191C9;KOG3544;1CUNK;12N1R	collagen, type XXVII, alpha 1 [Source:MGI Symbol;Acc:MGI:2672118]	373864	Q5QNQ9
ENSMUSG00000034858	271.607	530.705	12.5086	0.0235698	-5.40692	1.08881e-54	8.14645e-53	9	74860166	74939750	+	6637	Fam214a	GO:0003674;GO:0005575;GO:0008150;GO:0003674;GO:0005575;GO:0008150;GO:0003674;GO:0005575;GO:0008150;	-	-	S;U	0UI65;18XR8;1B2GJ;0DIV1;KOG2306;12Q8Z;0V8FK;09XHJ;1CTKC	family with sequence similarity 214, member A [Source:MGI Symbol;Acc:MGI:2387648]	235493	Q69ZK7
ENSMUSG00000002307	6304.02	474.944	12133.1	25.5464	4.67505	1.32512e-54	9.86521e-53	17	34128388	34134564	+	3151	Daxx	GO:0000775;GO:0005634;GO:0005654;GO:0005694;GO:0005730;GO:0005737;GO:0006325;GO:0006915;GO:0016605;GO:0000775;GO:0005634;GO:0005654;GO:0005694;GO:0005730;GO:0005737;GO:0006325;GO:0006915;GO:0016605;GO:0032147;GO:0045893;GO:0000775;GO:0005634;GO:0005654;GO:0005694;GO:0005730;GO:0005737;GO:0006325;GO:0006915;GO:0016605;GO:0000775;GO:0000775;GO:0001934;GO:0002039;GO:0003713;GO:0003714;GO:0005634;GO:…	K02308	-	K	0DGZA;0UIKG;0IGIP;12P90;1AUFZ;1CRPG;09VQQ;1944Y;0V6PS	Fas death domain-associated protein [Source:MGI Symbol;Acc:MGI:1197015]	13163	O35613;Q3UKR0
ENSMUSG00000026288	2877.4	5083.36	671.437	0.132085	-2.92046	1.51172e-54	1.11987e-52	1	87548034	87648229	+	7602	Inpp5d	GO:0002376;GO:0004439;GO:0004445;GO:0005515;GO:0005515;GO:0005515;GO:0005737;GO:0005829;GO:0005829;GO:0005856;GO:0005884;GO:0005886;GO:0005886;GO:0006915;GO:0008340;GO:0009968;GO:0016020;GO:0016064;GO:0016787;GO:0017124;GO:0030487;GO:0030853;GO:0030863;GO:0030889;GO:0032715;GO:0035556;GO:0043065;GO:0045121;GO:0045579;GO:0045621;GO:0045648;GO:0045656;GO:0045659;GO:0045671;GO:0045779;GO:0046856;GO:…	K03084	EC:3.1.3.86	T;U	0DENY;1B10H;1CR6F;1912W;0UKTP;KOG0565;09X1J;12Q93;0V7ZR	inositol polyphosphate-5-phosphatase D [Source:MGI Symbol;Acc:MGI:107357]	16331	Q9ES52
ENSMUSG00000030269	2328.15	498.383	4157.92	8.34281	3.06053	1.9343e-54	1.42585e-52	6	113214804	113258353	+	3006	Mtmr14	GO:0001726;GO:0001726;GO:0004438;GO:0004438;GO:0004438;GO:0004438;GO:0004725;GO:0005737;GO:0016311;GO:0016787;GO:0035335;GO:0048471;GO:0048471;GO:0004438;GO:0016311;GO:0004438;GO:0016311;GO:0004438;GO:0016311;GO:0004438;GO:0004438;GO:0004725;GO:0016311;GO:0035335;GO:0004438;GO:0004438;GO:0004725;GO:0016311;GO:0035335;GO:0004438;GO:0016311;GO:0004438;GO:0016311;	K18086	-	S	0DEN7;1B1W4;0V4A1;0UFN0;190ZI;1CPC3;0IHSK;130CG;09TAW	myotubularin related protein 14 [Source:MGI Symbol;Acc:MGI:1916075]	97287	Q8VEL2
ENSMUSG00000039501	13546.5	2802.24	24290.7	8.66833	3.11575	3.00583e-54	2.20486e-52	2	166877713	166904935	-	8189	Znfx1	GO:0003700;GO:0003723;GO:0004386;GO:0005634;GO:0006355;GO:0008270;GO:0031048;GO:0031380;GO:0046872;GO:0003700;GO:0004386;GO:0005634;GO:0006355;GO:0008270;GO:0046872;GO:0004386;GO:0004386;	-	-	L	0V51M;0UFUX;12Q27;1CQ21;0DFCA;09U2N;18SFG;KOG1807;1ARPR	zinc finger, NFX1-type containing 1 [Source:MGI Symbol;Acc:MGI:2138982]	98999	Q8R151
ENSMUSG00000047959	268.423	18.9879	517.859	27.2731	4.76941	4.91807e-54	3.58995e-52	3	106943485	106945386	+	1902	Kcna3	GO:0005216;GO:0005244;GO:0005249;GO:0005249;GO:0005249;GO:0005249;GO:0005251;GO:0005251;GO:0005251;GO:0005267;GO:0005886;GO:0005886;GO:0005886;GO:0005887;GO:0005887;GO:0006811;GO:0006811;GO:0006813;GO:0006813;GO:0008076;GO:0008076;GO:0015271;GO:0015271;GO:0016020;GO:0016020;GO:0016021;GO:0016021;GO:0030424;GO:0030424;GO:0034765;GO:0044305;GO:0044305;GO:0045121;GO:0045121;GO:0051260;GO:0055085;GO:…	K04876	-	P	0UFUA;18WGP;1CQJ8;09UK7;0DFVW;KOG1545;12QRV;0V5JH;1ARP7	potassium voltage-gated channel, shaker-related subfamily, member 3 [Source:MGI Symbol;Acc:MGI:96660]	16491	P16390
ENSMUSG00000022895	7223.18	344.576	14101.8	40.9251	5.35491	6.21758e-54	4.5165e-52	16	95502942	95522095	+	5780	Ets2	GO:0000122;GO:0000977;GO:0000978;GO:0000981;GO:0001227;GO:0001712;GO:0003677;GO:0003677;GO:0003677;GO:0003700;GO:0003700;GO:0005634;GO:0005634;GO:0005654;GO:0005829;GO:0005886;GO:0006355;GO:0006357;GO:0007498;GO:0019904;GO:0030154;GO:0035259;GO:0035259;GO:0043565;GO:0043565;GO:0045893;GO:0045944;GO:0045944;GO:0090009;GO:1990837;GO:0043565;	K21932	-	K	13IAS;09TSZ;191I0;KOG3806;1CPT4;0UG8N;0DF3A;0V4SB;1AX27	E26 avian leukemia oncogene 2, 3' domain [Source:MGI Symbol;Acc:MGI:95456]	23872	P15037;Q3UP99
ENSMUSG00000039116	1906.39	217.666	3595.12	16.5166	4.04585	6.96532e-54	5.03522e-52	10	14278327	14421403	-	12228	Adgrg6	GO:0004888;GO:0004930;GO:0004930;GO:0004930;GO:0004930;GO:0005515;GO:0005518;GO:0005737;GO:0005886;GO:0005886;GO:0005887;GO:0007005;GO:0007165;GO:0007166;GO:0007166;GO:0007186;GO:0007186;GO:0007189;GO:0007189;GO:0009986;GO:0014037;GO:0016020;GO:0016020;GO:0016021;GO:0016021;GO:0019933;GO:0019933;GO:0022011;GO:0022011;GO:0042552;GO:0042552;GO:0043236;GO:0043236;GO:0050840;GO:0060347;GO:0060347;GO:…	K08463	-	O;T	0URCV;1CRRY;KOG3714;12R5K;1B35H;09VTE;0V6S6;0DH1R;KOG4193;1928V	adhesion G protein-coupled receptor G6 [Source:MGI Symbol;Acc:MGI:1916151]	215798	Q6F3F9
ENSMUSG00000040511	1000.5	193.173	1807.82	9.3586	3.22629	1.19609e-53	8.60495e-52	7	19637503	19655085	-	6122	Pvr	GO:0001618;GO:0005515;GO:0005886;GO:0005912;GO:0007156;GO:0007157;GO:0009986;GO:0016020;GO:0016021;GO:0016477;GO:0045503;GO:0046718;GO:0098609;	K06539	-	-	-	poliovirus receptor [Source:MGI Symbol;Acc:MGI:107741]	52118	Q8K094
ENSMUSG00000023067	17297.9	496.75	34099	68.6443	6.10107	2.08378e-53	1.49195e-51	17	29309950	29319701	+	3553	Cdkn1a	GO:0000079;GO:0000082;GO:0000086;GO:0000307;GO:0004860;GO:0004860;GO:0004861;GO:0004861;GO:0005515;GO:0005515;GO:0005515;GO:0005515;GO:0005634;GO:0005634;GO:0005634;GO:0005654;GO:0005730;GO:0005737;GO:0005737;GO:0005829;GO:0006606;GO:0006974;GO:0006974;GO:0006977;GO:0006978;GO:0007049;GO:0007050;GO:0007050;GO:0007050;GO:0007050;GO:0007095;GO:0007095;GO:0007346;GO:0007346;GO:0007507;GO:0008285;GO:…	K06625	-	T	1933H;13Q29;1D30F;0UV0F;1B5ST;0DTNN;0A6NZ;0VHH2;KOG4743	cyclin-dependent kinase inhibitor 1A (P21) [Source:MGI Symbol;Acc:MGI:104556]	12575	P39689;Q564P6
ENSMUSG00000029553	3548.8	360.801	6736.81	18.6718	4.22279	3.92385e-53	2.79603e-51	6	16833372	16898440	-	5594	Tfec	GO:0000122;GO:0000122;GO:0000978;GO:0000978;GO:0000978;GO:0000981;GO:0001227;GO:0001227;GO:0001228;GO:0001228;GO:0003677;GO:0005634;GO:0005634;GO:0005654;GO:0005654;GO:0006355;GO:0006355;GO:0006355;GO:0006357;GO:0034605;GO:0045944;GO:0045944;GO:0045944;GO:0046983;GO:1990837;GO:1990837;GO:0006355;GO:0046983;	K15591	-	K	0DKYJ;12RZI;1ASQD;18TM8;1CPEI;0V9AE;KOG1318;0UQ0Y;09ZFZ	transcription factor EC [Source:MGI Symbol;Acc:MGI:1333760]	21426	Q9WTW4
ENSMUSG00000025076	1071.36	214.738	1927.97	8.97828	3.16644	4.61302e-53	3.27153e-51	19	56385561	56430776	+	4403	Casp7	GO:0004190;GO:0004197;GO:0004197;GO:0005515;GO:0005634;GO:0005737;GO:0005737;GO:0005829;GO:0005829;GO:0006508;GO:0006508;GO:0006508;GO:0006508;GO:0006915;GO:0006915;GO:0006915;GO:0007507;GO:0007568;GO:0008233;GO:0008233;GO:0008234;GO:0008234;GO:0008234;GO:0008234;GO:0009411;GO:0016485;GO:0016787;GO:0043231;GO:0043231;GO:0051146;GO:0051402;GO:0071887;GO:0072734;GO:0097153;GO:0097153;GO:0097194;GO:…	K04397	EC:3.4.22.60	D	1CS2Z;13KPR;0DMAH;09ZPU;0VE4P;0UI80;1ATSV;18USP;KOG3573	caspase 7 [Source:MGI Symbol;Acc:MGI:109383]	12369	P97864;Q4FJQ4
ENSMUSG00000021457	31400.2	8364.08	54436.3	6.50834	2.70229	5.40996e-53	3.81861e-51	13	52737209	52802828	+	9362	Syk	GO:0000166;GO:0000187;GO:0001525;GO:0001784;GO:0001784;GO:0001819;GO:0001820;GO:0001945;GO:0002092;GO:0002250;GO:0002250;GO:0002281;GO:0002281;GO:0002283;GO:0002283;GO:0002366;GO:0002376;GO:0002554;GO:0004672;GO:0004672;GO:0004672;GO:0004674;GO:0004674;GO:0004713;GO:0004713;GO:0004713;GO:0004715;GO:0004715;GO:0004715;GO:0004715;GO:0004715;GO:0005102;GO:0005178;GO:0005178;GO:0005515;GO:0005515;GO:…	K05855	EC:2.7.10.2	T	0IH0T;18VQR;13I3G;0UJB4;0VDHS;1AX5P;0DH8V;0A2MV;1CRYW	spleen tyrosine kinase [Source:MGI Symbol;Acc:MGI:99515]	20963	P48025;Q3UPF7;Q6P1E0
ENSMUSG00000044197	442.876	835.702	50.0508	0.0598908	-4.06152	5.66607e-53	3.98061e-51	5	139363452	139382170	+	6786	Gpr146	GO:0016020;GO:0016021;GO:0003674;GO:0004930;GO:0004930;GO:0005886;GO:0005886;GO:0007165;GO:0007186;GO:0007186;GO:0008150;GO:0016020;GO:0016021;GO:0016021;GO:0003674;GO:0004930;GO:0004930;GO:0005886;GO:0005886;GO:0005886;GO:0007165;GO:0007186;GO:0007186;GO:0008150;GO:0016020;GO:0016021;GO:0016021;	K08431	-	T	0ITRV;12TU1;1CSDM;195WY;1AVA5;09WDY;0V7CA;0DH4I;0UJTC	G protein-coupled receptor 146 [Source:MGI Symbol;Acc:MGI:1933113]	80290	Q99LE2
ENSMUSG00000118590	409.433	46.4127	772.454	16.6432	4.05686	1.54519e-52	1.08047e-50	1	84936703	84942293	+	1120	Gm15433	GO:0004930;GO:0007186;GO:0016020;GO:0016021;GO:0016021;	-	-	-	-	predicted pseudogene 15433 [Source:MGI Symbol;Acc:MGI:3705860]	-	-
ENSMUSG00000015846	1969.21	3487.3	451.118	0.12936	-2.95053	1.5907e-52	1.10713e-50	2	27566452	27652969	+	6303	Rxra	GO:0003677;GO:0003700;GO:0005634;GO:0006355;GO:0008270;GO:0043565;GO:0046872;GO:0000122;GO:0000122;GO:0000785;GO:0000785;GO:0000976;GO:0000976;GO:0000977;GO:0000978;GO:0000978;GO:0001162;GO:0001701;GO:0001890;GO:0001893;GO:0001972;GO:0003007;GO:0003677;GO:0003677;GO:0003677;GO:0003690;GO:0003700;GO:0003700;GO:0003707;GO:0004879;GO:0004879;GO:0004879;GO:0005515;GO:0005515;GO:0005515;GO:0005634;GO:…	K08524	-	K	18TMV;1B0V8;0V4Q5;0UN7V;0DF12;09TQV;1CPQX;13HS8;KOG3575	retinoid X receptor alpha [Source:MGI Symbol;Acc:MGI:98214]	20181	P28700;A2AJP1;Q3UMU4
ENSMUSG00000050395	2360.16	5.21108	4715.1	904.822	9.82149	1.64742e-52	1.14129e-50	4	63642840	63663350	-	5828	Tnfsf15	GO:0005164;GO:0005576;GO:0006915;GO:0006955;GO:0007165;GO:0016020;GO:0016020;	K05478	-	T	1CQ9X;18TDI;1ASMK;0V59S;0IFSK;09UAN;0UG1W;13NWF;0DFK9	tumor necrosis factor (ligand) superfamily, member 15 [Source:MGI Symbol;Acc:MGI:2180140]	326623	Q5UBV8;A0A0U5J7F3;B2RR33
ENSMUSG00000021087	1531.29	55.3039	3007.27	54.3772	5.76493	5.55261e-52	3.829e-50	12	72258526	72455828	-	4980	Rtn1	GO:0000139;GO:0000139;GO:0000139;GO:0005783;GO:0005783;GO:0005783;GO:0005789;GO:0005789;GO:0005790;GO:0005794;GO:0008150;GO:0016020;GO:0016021;GO:1902430;GO:1902430;GO:0005783;GO:0005789;GO:0016020;GO:0016021;GO:0005783;GO:0005789;GO:0016020;GO:0016021;	K20721	-	U	13BRI;1B0CF;1CQSZ;192C8;0DG3E;0URYM;0VBVP;0A2IP;KOG1792	reticulon 1 [Source:MGI Symbol;Acc:MGI:1933947]	104001	Q8K0T0;Q4FJL2;Q05CD8
ENSMUSG00000019838	9043.44	2390.74	15696.1	6.5654	2.71488	6.08104e-52	4.17416e-50	10	39909528	40018254	-	7356	Slc16a10	GO:0005886;GO:0005887;GO:0006590;GO:0015173;GO:0015349;GO:0015349;GO:0015349;GO:0015801;GO:0016020;GO:0016021;GO:0016021;GO:0016323;GO:0016323;GO:0016323;GO:0022857;GO:0030054;GO:0030054;GO:0043231;GO:0043231;GO:0055085;GO:0070327;GO:0070327;GO:0070460;GO:0005887;GO:0015173;GO:0015349;GO:0015801;GO:0016020;GO:0016021;GO:0022857;GO:0055085;GO:0070327;GO:0005886;GO:0005887;GO:0006590;GO:0015173;GO:…	K08187	-	P;G	0B38D;19713;1DEJJ;1BANY;0V2PT;0IMVX;13B4N;0WFKF;0E7J1	solute carrier family 16 (monocarboxylic acid transporters), member 10 [Source:MGI Symbol;Acc:MGI:1919722]	72472	Q3U9N9
ENSMUSG00000034343	2499.24	604.236	4394.24	7.27239	2.86243	6.2201e-52	4.25012e-50	1	91178026	91218059	+	8842	Ube2f	GO:0000166;GO:0000209;GO:0005524;GO:0005634;GO:0016740;GO:0018215;GO:0019788;GO:0019788;GO:0045116;GO:0045116;GO:0045116;GO:0061631;GO:0061654;GO:0000166;GO:0000209;GO:0005524;GO:0005634;GO:0016740;GO:0018215;GO:0019788;GO:0019788;GO:0045116;GO:0045116;GO:0045116;GO:0061631;GO:0061654;GO:0000166;GO:0000209;GO:0005524;GO:0005634;GO:0016740;GO:0018215;GO:0019788;GO:0019788;GO:0045116;GO:0045116;GO:…	K10687	EC:2.3.2.34	H;O	0V5I0;1CQHU;0DFUE;1B19A;191H2;KOG0420;12PWW;0UHAF;09UIU	ubiquitin-conjugating enzyme E2F (putative) [Source:MGI Symbol;Acc:MGI:1915171]	67921	Q9CY34
ENSMUSG00000030717	876.214	56.2779	1696.15	30.1388	4.91355	9.92057e-52	6.74779e-50	7	126222421	126230033	-	2514	Nupr1	GO:0002526;GO:0003677;GO:0003677;GO:0003677;GO:0003682;GO:0003713;GO:0003713;GO:0003713;GO:0005515;GO:0005634;GO:0005634;GO:0005634;GO:0005634;GO:0005654;GO:0005654;GO:0005737;GO:0005737;GO:0005737;GO:0006473;GO:0008285;GO:0008584;GO:0009636;GO:0010506;GO:0010507;GO:0010507;GO:0010507;GO:0010667;GO:0010667;GO:0010667;GO:0010698;GO:0031401;GO:0032993;GO:0032993;GO:0035914;GO:0042771;GO:0043065;GO:…	K15626	-	K	193XQ;KOG4319;1B6SM;0DVHV;1D4UG;0VK7B;13XEV;0UW9J;0A9AJ	nuclear protein transcription regulator 1 [Source:MGI Symbol;Acc:MGI:1891834]	56312	Q9WTK0
ENSMUSG00000029826	7578.29	2006.87	13149.7	6.55235	2.71201	1.30004e-51	8.80261e-50	6	38282221	38331538	-	6518	Zc3hav1	GO:0003950;GO:0005829;GO:0046872;GO:0046872;GO:0002376;GO:0003723;GO:0003723;GO:0003950;GO:0005634;GO:0005634;GO:0005737;GO:0005737;GO:0005829;GO:0006471;GO:0009615;GO:0009615;GO:0017151;GO:0032481;GO:0032727;GO:0032728;GO:0032781;GO:0042802;GO:0043123;GO:0045071;GO:0045071;GO:0045087;GO:0046872;GO:0046872;GO:0050691;GO:0051607;GO:0061014;GO:0061014;GO:0071360;GO:0098586;GO:1900246;GO:0002376;GO:…	K15259	EC:2.4.2.30	K	1DE2C;0V25N;1BAIQ;0KE5N;131I4;0W34Z;0E76D;0AQM1	zinc finger CCCH type, antiviral 1 [Source:MGI Symbol;Acc:MGI:1926031]	78781	Q3UPF5
ENSMUSG00000011008	3104.86	775.427	5434.3	7.00813	2.80903	1.62264e-51	1.09375e-49	3	145855588	145901268	+	3288	Mcoln2	GO:0002250;GO:0002376;GO:0005261;GO:0005262;GO:0005764;GO:0005768;GO:0006811;GO:0006816;GO:0015031;GO:0016020;GO:0016020;GO:0016021;GO:0032722;GO:0042802;GO:0045087;GO:0051209;GO:0055037;GO:0055038;GO:0070588;GO:0071639;GO:0071642;GO:0071651;GO:0072345;GO:1905517;GO:1990266;GO:2000341;GO:2000343;GO:0002250;GO:0002376;GO:0005261;GO:0005262;GO:0005764;GO:0005768;GO:0006811;GO:0006816;GO:0015031;GO:…	K04993	-	P	1AT4A;0DIN0;09XAK;KOG3733;0V88X;1CTCW;195F8;0URPK;12T8J	mucolipin 2 [Source:MGI Symbol;Acc:MGI:1915529]	68279	Q8K595
ENSMUSG00000032193	4351.87	1119.34	7584.41	6.77581	2.76039	1.81045e-51	1.21487e-49	9	21634779	21661215	+	9622	Ldlr	GO:0001540;GO:0002020;GO:0005041;GO:0005041;GO:0005509;GO:0005515;GO:0005615;GO:0005764;GO:0005764;GO:0005768;GO:0005768;GO:0005769;GO:0005769;GO:0005770;GO:0005770;GO:0005794;GO:0005794;GO:0005886;GO:0005886;GO:0005886;GO:0005886;GO:0005901;GO:0005905;GO:0005905;GO:0006629;GO:0006629;GO:0006869;GO:0006897;GO:0006897;GO:0006898;GO:0006909;GO:0007616;GO:0007616;GO:0008202;GO:0008203;GO:0008203;GO:…	K12473	-	T	1DCIN;196RX;0B01R;0WCI5;0E5IS;14T6W;0V10Y;1B9XX;0KD0U	low density lipoprotein receptor [Source:MGI Symbol;Acc:MGI:96765]	16835	P35951
ENSMUSG00000041773	730.175	1335.24	125.108	0.0936967	-3.41586	2.11524e-51	1.41305e-49	13	97377613	97389542	+	4737	Enc1	GO:0000785;GO:0003779;GO:0003779;GO:0005634;GO:0005634;GO:0005634;GO:0005654;GO:0005654;GO:0005730;GO:0005730;GO:0005737;GO:0005737;GO:0005737;GO:0005737;GO:0005856;GO:0007275;GO:0007399;GO:0010499;GO:0010499;GO:0010499;GO:0010499;GO:0010976;GO:0010976;GO:0016363;GO:0016363;GO:0016363;GO:0016567;GO:0016567;GO:0016567;GO:0017148;GO:0017148;GO:0017148;GO:0031463;GO:0031463;GO:0031463;GO:0031463;GO:…	K10462	-	T	09VH1;0DGRS;12PAX;1CRFT;1ATV8;18UVR;0V6GA;0UNVR;KOG4441	ectodermal-neural cortex 1 [Source:MGI Symbol;Acc:MGI:109610]	13803	O35709
ENSMUSG00000005087	23348.3	6378.58	40318	6.32084	2.66012	2.72872e-51	1.81478e-49	2	102641486	102732010	-	6776	Cd44	GO:0004896;GO:0005540;GO:0005540;GO:0005794;GO:0005829;GO:0005886;GO:0005902;GO:0007155;GO:0007155;GO:0009986;GO:0016020;GO:0016021;GO:0016021;GO:0016324;GO:0016477;GO:0019221;GO:0030214;GO:0031258;GO:0033138;GO:0034116;GO:0035692;GO:0042110;GO:0042995;GO:0042995;GO:0043066;GO:0043154;GO:0043518;GO:0044319;GO:0044344;GO:0050731;GO:0051216;GO:0070374;GO:0070487;GO:1900625;GO:1902166;GO:2000392;GO:…	K06256	-	W;T	1B3SZ;18UX2;1CUI9;0UNIM;13SK8;0DJR6;09YBF;0V990;0IZCP	CD44 antigen [Source:MGI Symbol;Acc:MGI:88338]	12505	P15379;A2APM2
ENSMUSG00000024472	2366.96	577.963	4155.96	7.19071	2.84613	3.35083e-51	2.21867e-49	18	44513569	44558036	+	8702	Dcp2	GO:0003723;GO:0016787;GO:0030145;GO:0000184;GO:0000184;GO:0000290;GO:0000290;GO:0000932;GO:0000932;GO:0000932;GO:0003723;GO:0003723;GO:0004534;GO:0005634;GO:0005654;GO:0005737;GO:0005737;GO:0006402;GO:0006402;GO:0016442;GO:0016787;GO:0016787;GO:0030054;GO:0030145;GO:0032211;GO:0036464;GO:0043488;GO:0043488;GO:0046872;GO:0050072;GO:0050072;GO:0050072;GO:0050072;GO:0071044;GO:0071044;GO:0090503;GO:…	K12613	EC:3.6.1.62	A	133BG;18W29;1ASQX;0UTVQ;0DRR6;1D0Z3;0VDJN;KOG2937;0A2PS	decapping mRNA 2 [Source:MGI Symbol;Acc:MGI:1917890]	70640	Q9CYC6;Q3U671
ENSMUSG00000023088	11079.8	2984.23	19175.3	6.42555	2.68382	4.38923e-51	2.89341e-49	16	14179422	14293601	+	15092	Abcc1	GO:0005524;GO:0016020;GO:0016021;GO:0016021;GO:0042626;GO:0055085;GO:0005524;GO:0016020;GO:0016021;GO:0016021;GO:0042626;GO:0055085;GO:0005524;GO:0016020;GO:0016021;GO:0016021;GO:0042626;GO:0055085;GO:0000166;GO:0005324;GO:0005524;GO:0005524;GO:0005737;GO:0005886;GO:0005886;GO:0005887;GO:0006979;GO:0008559;GO:0008559;GO:0008559;GO:0009925;GO:0015431;GO:0015562;GO:0015562;GO:0015911;GO:0016020;GO:…	K05665	EC:7.6.2.3	Q	KOG0054;0V48M;09T9I;1CPBJ;0DEMQ;1B0KR;12N3Q;0UFM2;191RV	ATP-binding cassette, sub-family C (CFTR/MRP), member 1 [Source:MGI Symbol;Acc:MGI:102676]	17250	O35379;A5D6P3
ENSMUSG00000054717	970.398	196.914	1743.88	8.85607	3.14667	5.60422e-51	3.67814e-49	8	57964941	57969033	+	3003	Hmgb2	GO:0000785;GO:0000785;GO:0000793;GO:0000793;GO:0000793;GO:0000976;GO:0000976;GO:0000987;GO:0001938;GO:0001938;GO:0002376;GO:0002437;GO:0003677;GO:0003677;GO:0003677;GO:0003677;GO:0003677;GO:0003684;GO:0003684;GO:0003690;GO:0003690;GO:0003713;GO:0003713;GO:0005515;GO:0005576;GO:0005615;GO:0005615;GO:0005615;GO:0005634;GO:0005634;GO:0005634;GO:0005634;GO:0005634;GO:0005654;GO:0005654;GO:0005694;GO:…	K11295	-	K;B	0UGBY;09Z4C;KOG0381;0DF62;0VDMV;194UU;12T0N;1ARPK;1CPVN	high mobility group box 2 [Source:MGI Symbol;Acc:MGI:96157]	97165	P30681
ENSMUSG00000063268	2516.21	439.705	4592.72	10.445	3.38474	6.10694e-51	3.99058e-49	15	76115374	76127641	-	4275	Parp10	GO:0003950;GO:0003950;GO:0016740;GO:0016757;GO:0003714;GO:0003950;GO:0003950;GO:0003950;GO:0005634;GO:0005634;GO:0005634;GO:0005730;GO:0005730;GO:0005737;GO:0005737;GO:0005737;GO:0005794;GO:0005794;GO:0005829;GO:0005829;GO:0006281;GO:0006471;GO:0006974;GO:0010629;GO:0010629;GO:0010847;GO:0016740;GO:0016757;GO:0019985;GO:0019985;GO:0032088;GO:0045071;GO:0045892;GO:0048147;GO:0070212;GO:0070212;GO:…	K15261	EC:2.4.2.30	S	09V45;1CR2R;0URB6;1AXS0;18THP;0IH3S;0DGDA;0V63S;12T9U	poly (ADP-ribose) polymerase family, member 10 [Source:MGI Symbol;Acc:MGI:3712326]	671535	Q8CIE4
ENSMUSG00000020573	4005.13	1038.14	6972.12	6.71597	2.7476	9.91902e-51	6.4534e-49	12	32223472	32258658	-	8426	Pik3cg	GO:0000166;GO:0001525;GO:0001932;GO:0002376;GO:0002675;GO:0003376;GO:0003376;GO:0004674;GO:0005515;GO:0005524;GO:0005737;GO:0005737;GO:0005737;GO:0005829;GO:0005829;GO:0005886;GO:0005886;GO:0005886;GO:0005942;GO:0005942;GO:0005943;GO:0005944;GO:0005944;GO:0006468;GO:0006897;GO:0006935;GO:0006954;GO:0007186;GO:0007204;GO:0010595;GO:0010595;GO:0010897;GO:0014065;GO:0014065;GO:0014065;GO:0016020;GO:…	K21289	EC:2.7.1.153	T	18V6R;KOG0904;0DMAW;0UFCH;1CW62;1B0E0;09WZX;12QH0;0V7XY	phosphatidylinositol-4,5-bisphosphate 3-kinase catalytic subunit gamma [Source:MGI Symbol;Acc:MGI:1353576]	30955	Q9JHG7;Q3UVA4;Q8C5Q7
ENSMUSG00000045932	26379	83.967	52674	627.318	9.29305	1.11257e-50	7.20714e-49	19	34528094	34553819	+	3927	Ifit2	GO:0035457;GO:0005737;GO:0005783;GO:0009615;GO:0032091;GO:0035457;GO:0043065;	-	-	T;P	195AX;0UPM4;1CVFR;12U68;0DKMA;KOG1124;09Z5A;1B0A0;0VA2H	interferon-induced protein with tetratricopeptide repeats 2 [Source:MGI Symbol;Acc:MGI:99449]	15958	Q64112;Q6GTM0
ENSMUSG00000048756	1082.05	1963.33	200.765	0.102258	-3.28972	1.23831e-50	7.9871e-49	10	42057837	42152751	-	7571	Foxo3	GO:0000122;GO:0000976;GO:0000978;GO:0000978;GO:0000981;GO:0001221;GO:0001221;GO:0001227;GO:0001228;GO:0001228;GO:0001542;GO:0001544;GO:0001547;GO:0001556;GO:0003677;GO:0003677;GO:0003700;GO:0003700;GO:0003700;GO:0005515;GO:0005515;GO:0005634;GO:0005634;GO:0005634;GO:0005634;GO:0005654;GO:0005654;GO:0005737;GO:0005737;GO:0005737;GO:0005739;GO:0005739;GO:0005739;GO:0005741;GO:0005741;GO:0005759;GO:…	K09408	-	K	0DQUT;1CZYP;13DZ1;18Y31;0UKYQ;09XVH;0VE27;1B08Z;KOG2294	forkhead box O3 [Source:MGI Symbol;Acc:MGI:1890081]	56484	Q9WVH4
ENSMUSG00000004099	1536.98	2722.27	351.689	0.129189	-2.95244	3.40034e-50	2.18381e-48	9	20818505	20871184	-	7377	Dnmt1	GO:0003677;GO:0003677;GO:0003682;GO:0003682;GO:0003886;GO:0003886;GO:0005634;GO:0005634;GO:0008168;GO:0008168;GO:0008270;GO:0016740;GO:0032259;GO:0046872;GO:0090116;GO:0000122;GO:0000792;GO:0003677;GO:0003677;GO:0003677;GO:0003682;GO:0003682;GO:0003723;GO:0003824;GO:0003886;GO:0003886;GO:0003886;GO:0005515;GO:0005515;GO:0005515;GO:0005634;GO:0005634;GO:0005634;GO:0005634;GO:0005654;GO:0005657;GO:…	K00558	EC:2.1.1.37	K;B	12RZZ;0UQ1T;0V6G0;0DGRF;1CRFF;09VGR;18UKG;0IF68;1AUWR	DNA methyltransferase (cytosine-5) 1 [Source:MGI Symbol;Acc:MGI:94912]	13433	P13864;Q3UHZ3
ENSMUSG00000021930	2138.42	526.928	3749.92	7.11657	2.83118	4.02048e-50	2.57104e-48	14	61769442	61794335	-	4002	Spryd7	GO:0003674;GO:0005575;GO:0008150;GO:0016020;GO:0016021;	-	-	S	1CWV5;0A2DC;0VD8Z;192RP;13NA9;KOG4030;1AZUK;0UQ46;0DQ0P	SPRY domain containing 7 [Source:MGI Symbol;Acc:MGI:1913924]	66674	Q3TFQ1
ENSMUSG00000021367	3043.68	4.91842	6082.45	1236.67	10.2722	4.1548e-50	2.64564e-48	13	42454952	42461466	+	2139	Edn1	GO:0000122;GO:0000122;GO:0001501;GO:0001516;GO:0001516;GO:0001569;GO:0001666;GO:0001666;GO:0001701;GO:0001821;GO:0001821;GO:0003100;GO:0003100;GO:0003100;GO:0005102;GO:0005125;GO:0005125;GO:0005179;GO:0005179;GO:0005179;GO:0005515;GO:0005576;GO:0005576;GO:0005615;GO:0005615;GO:0005615;GO:0005615;GO:0005737;GO:0005737;GO:0006874;GO:0006885;GO:0007166;GO:0007166;GO:0007186;GO:0007186;GO:0007193;GO:…	K16366	-	T;W	0UM0E;0V842;13QFQ;0IWVG;09X5H;192NH;1AWGE;0DIGI;1CT73	endothelin 1 [Source:MGI Symbol;Acc:MGI:95283]	13614	P22387;Q544E0
ENSMUSG00000031824	596.259	1097.58	94.9405	0.0865001	-3.53115	5.4266e-50	3.44083e-48	8	120840891	120892045	+	6626	6430548M08Rik	GO:0003674;GO:0005575;GO:0008150;GO:0003674;GO:0005575;GO:0008150;	-	-	S	1AWMT;0VCM8;0UIHK;0IDYE;19114;13IIA;1CUU5;0A1RM;0DK05	RIKEN cDNA 6430548M08 gene [Source:MGI Symbol;Acc:MGI:2443793]	234797	Q8R0A7
ENSMUSG00000062488	1096.55	20.1629	2172.94	107.769	6.7518	5.62294e-50	3.55028e-48	19	34585370	34590801	+	2000	Ifit3b	GO:0003723;GO:0005737;GO:0005739;GO:0005829;GO:0005829;GO:0035457;GO:0042802;GO:0051607;	-	-	T;P	1AVY2;0UPM4;18T62;1CVFR;12U68;0DKMA;KOG1124;09Z5A;0VA2H	interferon-induced protein with tetratricopeptide repeats 3B [Source:MGI Symbol;Acc:MGI:3698419]	667370	E9PV48;Q8BPC3
ENSMUSG00000020250	30387.5	8546.53	52228.6	6.11108	2.61143	6.41849e-50	4.03556e-48	10	82669785	82733546	+	7086	Txnrd1	GO:0001650;GO:0001650;GO:0001707;GO:0004791;GO:0004791;GO:0004791;GO:0004791;GO:0005634;GO:0005654;GO:0005654;GO:0005737;GO:0005737;GO:0005737;GO:0005739;GO:0005739;GO:0005829;GO:0006979;GO:0007369;GO:0008283;GO:0010942;GO:0016174;GO:0016259;GO:0016491;GO:0016491;GO:0016668;GO:0033797;GO:0042537;GO:0042744;GO:0042802;GO:0043025;GO:0045340;GO:0045454;GO:0045454;GO:0050660;GO:0055114;GO:0055114;GO:…	K22182	EC:1.8.1.9	Q;O	1CVEN;09UWI;KOG0405;0UPJN;12PHT;0V5W9;1AUW3;0DKK6;190DN	thioredoxin reductase 1 [Source:MGI Symbol;Acc:MGI:1354175]	50493	Q9JMH6
ENSMUSG00000038179	9999.68	833.03	19166.3	23.008	4.52406	7.51109e-50	4.70276e-48	1	171459971	171480603	-	4577	Slamf7	GO:0016020;GO:0016021;GO:0016020;GO:0016021;GO:0016020;GO:0016021;GO:0016020;GO:0016021;	K06733	-	T;U	13I4Z;192R3;0V886;0DIM9;1AUM9;1CTC4;0IJW6;09X9V;0UJ49	SLAM family member 7 [Source:MGI Symbol;Acc:MGI:1922595]	75345	Q8BHK6;A0A0R4J2D8
ENSMUSG00000033705	1835.86	3231.92	439.8	0.13608	-2.87747	8.30486e-50	5.17808e-48	2	120459602	120562376	+	22053	Stard9	GO:0000166;GO:0003777;GO:0003777;GO:0003777;GO:0003777;GO:0005524;GO:0005524;GO:0005634;GO:0005634;GO:0005737;GO:0005737;GO:0005814;GO:0005814;GO:0005856;GO:0005871;GO:0005874;GO:0007018;GO:0007018;GO:0008017;GO:0008017;GO:0008017;GO:0008017;GO:0008289;GO:0008574;GO:0016887;GO:0051225;GO:0051225;GO:0000166;GO:0003774;GO:0003777;GO:0005524;GO:0005524;GO:0005874;GO:0007018;GO:0008017;GO:0008289;	K16491	-	Z	1AXT5;0DF02;0V8TH;KOG0245;0UR98;1CPPU;09Y8U;12QSJ;18UHN	START domain containing 9 [Source:MGI Symbol;Acc:MGI:3045258]	668880	-
ENSMUSG00000028412	6790.16	1853.81	11726.5	6.32563	2.66121	1.1644e-49	7.22991e-48	4	53440413	53622478	+	6945	Slc44a1	GO:0016020;GO:0016021;GO:0022857;GO:0055085;GO:0005654;GO:0005739;GO:0005739;GO:0005741;GO:0005829;GO:0005886;GO:0005886;GO:0005886;GO:0015220;GO:0015220;GO:0015220;GO:0015871;GO:0015871;GO:0015871;GO:0016020;GO:0016020;GO:0016021;GO:0016021;GO:0022857;GO:0022857;GO:0055085;GO:0055085;GO:0055085;GO:0055085;GO:0016020;GO:0016021;GO:0022857;GO:0055085;GO:0005654;GO:0005739;GO:0005829;GO:0005886;GO:…	K06515	-	I;P	0DF4J;0V4TJ;18U27;0UIE2;KOG1362;13HK7;09TUA;1B0EA;1CPUE	solute carrier family 44, member 1 [Source:MGI Symbol;Acc:MGI:2140592]	100434	Q6X893
ENSMUSG00000037295	2099.01	3681.83	516.179	0.140196	-2.83448	1.22045e-49	7.54664e-48	4	134468865	134495335	-	7010	Ldlrap1	GO:0001540;GO:0001540;GO:0001540;GO:0001784;GO:0001784;GO:0001784;GO:0005102;GO:0005515;GO:0005515;GO:0005546;GO:0005546;GO:0005737;GO:0005737;GO:0005769;GO:0005769;GO:0005769;GO:0005829;GO:0005829;GO:0005829;GO:0005883;GO:0006629;GO:0006897;GO:0006898;GO:0006898;GO:0008202;GO:0008203;GO:0009898;GO:0009898;GO:0009925;GO:0009925;GO:0009925;GO:0030159;GO:0030159;GO:0030276;GO:0030276;GO:0030276;GO:…	K12474	-	T	09YQM;1AU8E;0UIR5;0V9NG;131AV;0DK53;1CUYX;191QK;KOG3536	low density lipoprotein receptor adaptor protein 1 [Source:MGI Symbol;Acc:MGI:2140175]	100017	Q8C142
ENSMUSG00000031453	2077.3	3841.91	312.681	0.0813869	-3.61906	1.65133e-49	1.01689e-47	8	13616948	13727603	-	5095	Rasa3	GO:0005096;GO:0005096;GO:0007165;GO:0015278;GO:0015278;GO:0031235;GO:0031235;GO:0034605;GO:0035556;GO:0043087;GO:0043547;GO:0046580;GO:0046872;GO:0051209;	K12380	-	T	0URC2;KOG2059;18TE0;09WRB;0V7PR;12R8D;1CSRM;0DI0X;1AW1K	RAS p21 protein activator 3 [Source:MGI Symbol;Acc:MGI:1197013]	19414	Q60790
ENSMUSG00000074896	7154.41	51.9841	14256.8	274.254	8.09937	1.9005e-49	1.16553e-47	19	34560931	34566131	+	1745	Ifit3	GO:0002376;GO:0003723;GO:0005515;GO:0005737;GO:0005737;GO:0005739;GO:0005739;GO:0005829;GO:0005829;GO:0008285;GO:0009615;GO:0009617;GO:0035457;GO:0035458;GO:0035634;GO:0042802;GO:0043066;GO:0045087;GO:0051607;GO:0051607;	-	-	T;P	1AVY2;0UPM4;18T62;1CVFR;12U68;0DKMA;KOG1124;09Z5A;0VA2H	interferon-induced protein with tetratricopeptide repeats 3 [Source:MGI Symbol;Acc:MGI:1101055]	15959	Q64345;Q5FW82
ENSMUSG00000021366	3040.95	748.782	5333.11	7.12238	2.83236	1.92673e-49	1.1768e-47	13	42205497	42346013	+	9294	Hivep1	GO:0000122;GO:0000122;GO:0000978;GO:0001227;GO:0003676;GO:0005634;GO:0005634;GO:0005654;GO:0005739;GO:0005829;GO:0008270;GO:0016604;GO:0030509;GO:0045944;GO:1990837;	K09239	-	K	0VAS5;0DME5;13IMQ;0UH3W;KOG1721;09ZVR;19049;1ARNR;1CW9C	human immunodeficiency virus type I enhancer binding protein 1 [Source:MGI Symbol;Acc:MGI:96100]	110521	F8VPM9
ENSMUSG00000036617	190.294	376.644	3.94371	0.0104707	-6.5775	2.18391e-49	1.32846e-47	2	19914591	20815524	+	16148	Etl4	GO:0048706;GO:0048706;GO:0048706;GO:0048706;GO:0048706;GO:0003674;GO:0005515;GO:0005737;GO:0005737;GO:0007275;GO:0030234;GO:0048706;GO:0048706;GO:0050790;GO:0003674;GO:0005515;GO:0005737;GO:0005737;GO:0007275;GO:0030234;GO:0048706;GO:0048706;GO:0050790;GO:0048706;GO:0003674;GO:0005515;GO:0005737;GO:0005737;GO:0007275;GO:0030234;GO:0048706;GO:0048706;GO:0050790;GO:0003674;GO:0005515;GO:0005737;GO:…	-	-	S	0V5T5;12RRH;0UHPS;18SBZ;1CQSM;09UTK;0IG2A;0DG33;1B44Z	enhancer trap locus 4 [Source:MGI Symbol;Acc:MGI:95454]	208618	A2AQ25;E9QAU4;B2RY09
ENSMUSG00000025154	2861.59	5663.32	59.8661	0.0105708	-6.56377	2.78293e-49	1.68598e-47	19	41755027	41790486	-	5103	Arhgap19	GO:0005096;GO:0005096;GO:0005737;GO:0005886;GO:0007165;GO:0043231;GO:0043547;GO:0051056;GO:0007165;GO:0005096;GO:0005096;GO:0005737;GO:0005886;GO:0007165;GO:0043231;GO:0043547;GO:0051056;	K20640	-	T	0E84X;1975Z;0WGNE;0B467;0V31V;1DF3W;1BAXX;13CNI;0IPRZ	Rho GTPase activating protein 19 [Source:MGI Symbol;Acc:MGI:1918335]	71085	Q8BRH3
ENSMUSG00000003283	9523.34	1111.55	17935.1	16.1352	4.01214	2.83682e-49	1.7117e-47	2	152950388	152993361	+	2092	Hck	GO:0000166;GO:0001784;GO:0002376;GO:0004672;GO:0004713;GO:0004713;GO:0004713;GO:0004715;GO:0004715;GO:0005102;GO:0005515;GO:0005524;GO:0005524;GO:0005634;GO:0005654;GO:0005737;GO:0005764;GO:0005764;GO:0005794;GO:0005829;GO:0005856;GO:0005884;GO:0005884;GO:0005886;GO:0005886;GO:0005901;GO:0005901;GO:0005925;GO:0005925;GO:0006468;GO:0006887;GO:0006909;GO:0006909;GO:0006954;GO:0007169;GO:0008284;GO:…	K08893	EC:2.7.10.2	Z;T	18UEZ;0V4Q4;1AZTR;KOG0197;09TQU;0USB1;1CPQW;0DF11;12NBR	hemopoietic cell kinase [Source:MGI Symbol;Acc:MGI:96052]	15162	P08103
ENSMUSG00000066800	402.846	757.673	48.0185	0.0633762	-3.97991	3.68677e-49	2.21562e-47	1	153625172	153639967	+	6641	Rnasel	GO:0000166;GO:0003723;GO:0003723;GO:0003723;GO:0003723;GO:0004518;GO:0004519;GO:0004540;GO:0004540;GO:0004540;GO:0004672;GO:0005524;GO:0005524;GO:0005737;GO:0005739;GO:0006364;GO:0006396;GO:0006397;GO:0006468;GO:0016363;GO:0016787;GO:0019843;GO:0042802;GO:0043021;GO:0043488;GO:0045071;GO:0045071;GO:0045071;GO:0045444;GO:0045944;GO:0045944;GO:0046326;GO:0046872;GO:0051607;GO:0051607;GO:0051607;GO:…	K01165	-	T;M;K	0V0UR;KOG4177;0AZTQ;14SY9;196Q6;1DCBT;KOG1027;1B9TM;0WCA3;0E5BR	ribonuclease L (2', 5'-oligoisoadenylate synthetase-dependent) [Source:MGI Symbol;Acc:MGI:1098272]	24014	Q05921;B2RQP1
ENSMUSG00000031792	2099.34	525.522	3673.15	6.98953	2.8052	3.8017e-49	2.27555e-47	8	96058912	96074135	+	2803	Usb1	GO:0000175;GO:0000175;GO:0004518;GO:0004518;GO:0005634;GO:0005634;GO:0005654;GO:0008380;GO:0016787;GO:0034477;GO:0034477;GO:0034477;GO:0045171;GO:0090305;GO:0090503;GO:1990838;GO:0004518;GO:0005634;GO:0016787;GO:0034477;GO:0090305;	K23093	EC:3.1.4.-	A	13NN2;KOG3102;1CU9Y;1B2RS;0UM5C;18VP2;0DJHH;0A2EH;0VDA4	U6 snRNA biogenesis 1 [Source:MGI Symbol;Acc:MGI:2142454]	101985	Q91W78;A0A0R4J0E0
ENSMUSG00000020263	1165.46	2076.39	254.534	0.122585	-3.02814	4.50476e-49	2.68563e-47	10	83435897	83484602	-	5949	Appl2	GO:0001726;GO:0001786;GO:0001786;GO:0001786;GO:0002024;GO:0005515;GO:0005515;GO:0005634;GO:0005634;GO:0005634;GO:0005737;GO:0005737;GO:0005768;GO:0005768;GO:0005768;GO:0005886;GO:0005886;GO:0005886;GO:0006606;GO:0006606;GO:0006606;GO:0007049;GO:0007179;GO:0007179;GO:0007179;GO:0008283;GO:0009631;GO:0010008;GO:0010008;GO:0010008;GO:0010008;GO:0010762;GO:0016020;GO:0016020;GO:0016020;GO:0023052;GO:…	K20132	-	T	1CPRZ;1AS00;18STI;09TRU;0UG6X;0DF27;0V4R5;KOG0521;12QH7;KOG3536	adaptor protein, phosphotyrosine interaction, PH domain and leucine zipper containing 2 [Source:MGI Symbol;Acc:MGI:2384914]	216190	Q8K3G9;Q3TVI6
ENSMUSG00000039156	1585.45	379.046	2791.85	7.36546	2.88078	4.69652e-49	2.78884e-47	5	54155841	54278399	+	5133	Stim2	GO:0002115;GO:0005246;GO:0005246;GO:0005246;GO:0005246;GO:0005509;GO:0005509;GO:0005509;GO:0005515;GO:0005783;GO:0005783;GO:0005783;GO:0005789;GO:0005886;GO:0005886;GO:0005886;GO:0006811;GO:0006816;GO:0006874;GO:0006874;GO:0006874;GO:0006874;GO:0015279;GO:0015279;GO:0016020;GO:0016021;GO:0016021;GO:0032237;GO:0032237;GO:0032237;GO:0046872;GO:0051928;GO:0051928;GO:0070588;GO:0005246;GO:0005246;GO:…	K18196	-	U	12U3H;1CWUR;0VB42;0DMUQ;1AS6U;18T0S;0UGP7;0A080;KOG4403	stromal interaction molecule 2 [Source:MGI Symbol;Acc:MGI:2151156]	116873	P83093;A5CVE4
ENSMUSG00000078153	1105.81	244.862	1966.77	8.03215	3.00579	5.30641e-49	3.13855e-47	11	48836181	48837017	-	837	Psme2b	GO:0000502;GO:0005515;GO:0005654;GO:0005737;GO:0008537;GO:0010950;GO:0019884;GO:0042802;GO:0061133;GO:0061136;GO:2000045;	K06697	-	O	0A1VR;0US2U;1B22K;18U73;1CYGD;KOG4470;12U3Q;0DPHV;0VCRB	protease (prosome, macropain) activator subunit 2B [Source:MGI Symbol;Acc:MGI:1341073]	621823	P97372;Q5SVP3
ENSMUSG00000037331	7151.71	1982.6	12320.8	6.21446	2.63563	7.1586e-49	4.21738e-47	11	57899890	57952860	+	6829	Larp1	GO:0003723;GO:0000339;GO:0000339;GO:0000340;GO:0000340;GO:0003723;GO:0003730;GO:0003730;GO:0005737;GO:0005737;GO:0005844;GO:0005844;GO:0006413;GO:0006413;GO:0006417;GO:0008190;GO:0008190;GO:0008283;GO:0008283;GO:0008494;GO:0008494;GO:0010494;GO:0010494;GO:0010608;GO:0016239;GO:0017148;GO:0017148;GO:0031369;GO:0031369;GO:0031929;GO:0031929;GO:0031931;GO:0031931;GO:0038202;GO:0038202;GO:0042788;GO:…	K18757	-	O;J	12RRR;0V7PU;0DI11;KOG2590;1CSRR;09WRF;18YBQ;0UP4C;1B0DG	La ribonucleoprotein domain family, member 1 [Source:MGI Symbol;Acc:MGI:1890165]	73158	Q6ZQ58
ENSMUSG00000040451	2454.98	630.456	4279.5	6.78794	2.76297	8.81214e-49	5.17117e-47	19	32100127	32367114	-	10546	Sgms1	GO:0000138;GO:0000139;GO:0002950;GO:0005634;GO:0005783;GO:0005794;GO:0005886;GO:0005887;GO:0006629;GO:0006665;GO:0006686;GO:0006686;GO:0006686;GO:0006915;GO:0006954;GO:0010628;GO:0016020;GO:0016021;GO:0016301;GO:0016310;GO:0016740;GO:0030173;GO:0030173;GO:0030173;GO:0030176;GO:0033188;GO:0033188;GO:0033188;GO:0033188;GO:0046513;GO:0046513;GO:0047493;GO:0047493;GO:0047493;GO:2001237;GO:0000138;GO:…	K04714	EC:2.7.8.27	I;G	0UQRH;0V51K;1B389;18ZW2;12NHQ;KOG3058;0DFEG;09U2M;1CY5E	sphingomyelin synthase 1 [Source:MGI Symbol;Acc:MGI:2444110]	208449	Q8VCQ6
ENSMUSG00000023106	2023.51	509.456	3537.56	6.94379	2.79572	1.69119e-48	9.88552e-47	5	124045238	124066898	+	6094	Denr	GO:0001731;GO:0001731;GO:0001731;GO:0002188;GO:0003729;GO:0003743;GO:0003743;GO:0006412;GO:0006413;GO:0006413;GO:0032790;GO:0032790;GO:0075522;GO:0075522;GO:0003743;GO:0003743;GO:0006412;GO:0006413;GO:0006413;	K24272	-	J	09U3U;0UPXY;KOG3239;0V52Y;18RZY;1B4F0;13QMC;0DFDI;1CQ3A	density-regulated protein [Source:MGI Symbol;Acc:MGI:1915434]	68184	Q9CQJ6
ENSMUSG00000029490	1818.91	216.467	3421.36	15.8054	3.98235	2.06672e-48	1.20336e-46	5	108588920	108596966	-	5340	Mfsd7a	GO:0005575;GO:0016020;GO:0016021;GO:0022857;GO:0055085;GO:0016020;GO:0016021;	K12306	-	B;U	0UU62;0DR51;0VED7;KOG2563;1B1Y8;1D0A9;13K1N;0A2H3;191R2	major facilitator superfamily domain containing 7A [Source:MGI Symbol;Acc:MGI:2442629]	243197	Q8CE47
ENSMUSG00000046879	6583.18	549.887	12616.5	22.9438	4.52003	3.41863e-48	1.9828e-46	11	48752795	48762510	-	5810	Irgm1	GO:0000045;GO:0000139;GO:0000166;GO:0000421;GO:0001891;GO:0002376;GO:0003924;GO:0005525;GO:0005525;GO:0005764;GO:0005765;GO:0005768;GO:0005770;GO:0005776;GO:0005783;GO:0005789;GO:0005794;GO:0005886;GO:0006914;GO:0006952;GO:0006952;GO:0009617;GO:0016020;GO:0016020;GO:0016787;GO:0030670;GO:0031410;GO:0031902;GO:0035458;GO:0042995;GO:0044754;GO:0045087;GO:0045335;GO:0060335;GO:0071346;GO:0075044;GO:…	K14139	EC:3.6.5.-	S	0VCS4;1B342;0USWG;0A1WK;0J94V;1CYHC;143RS;0DPIR;194HK	immunity-related GTPase family M member 1 [Source:MGI Symbol;Acc:MGI:107567]	15944	Q60766
ENSMUSG00000072620	21711.3	2464.6	40957.9	16.6185	4.05472	3.43805e-48	1.98637e-46	11	82955938	82961504	+	1664	Slfn2	GO:0008285;GO:0009617;	K24457	-	S	1D111;1423J;19473;0A069;1B7CR;0VDXK;0JAUV;0DRSW;0UUIB	schlafen 2 [Source:MGI Symbol;Acc:MGI:1313258]	20556	Q9Z0I6
ENSMUSG00000002699	11278.5	743.114	21813.9	29.3547	4.87552	3.86411e-48	2.22394e-46	11	33996920	34042295	+	4459	Lcp2	GO:0005515;GO:0005515;GO:0005737;GO:0005829;GO:0005829;GO:0005829;GO:0005911;GO:0007169;GO:0035556;GO:0036398;GO:0036398;GO:0044853;GO:0044853;GO:0045576;GO:0045860;GO:0050852;GO:0050852;	K07361	-	-	-	lymphocyte cytosolic protein 2 [Source:MGI Symbol;Acc:MGI:1321402]	16822	Q60787
ENSMUSG00000032122	8349.24	14317	2381.52	0.166343	-2.58777	4.47857e-48	2.56771e-46	9	37138881	37167034	-	6643	Slc37a2	GO:0005783;GO:0005789;GO:0006072;GO:0006127;GO:0008643;GO:0015169;GO:0015297;GO:0015760;GO:0015760;GO:0015760;GO:0015794;GO:0016020;GO:0016021;GO:0016021;GO:0022857;GO:0030176;GO:0030176;GO:0030176;GO:0035435;GO:0035435;GO:0035435;GO:0055085;GO:0061513;GO:0061513;GO:0061513;GO:0005783;GO:0005789;GO:0006072;GO:0006127;GO:0008643;GO:0015169;GO:0015297;GO:0015760;GO:0015760;GO:0015760;GO:0015760;GO:…	K13783	-	P;G	0IP3Z;1DEWU;1BAUJ;0B3U9;0V2X4;1973T;0E7X8;13C4R;0WG8R	solute carrier family 37 (glycerol-3-phosphate transporter), member 2 [Source:MGI Symbol;Acc:MGI:1929693]	56857	Q9WU81
ENSMUSG00000022906	5332.87	526.894	10138.9	19.2427	4.26624	5.37426e-48	3.06948e-46	16	35758840	35792975	+	4872	Parp9	GO:0000122;GO:0000122;GO:0002230;GO:0002230;GO:0002376;GO:0003714;GO:0003714;GO:0003714;GO:0003950;GO:0003950;GO:0003950;GO:0003950;GO:0004857;GO:0004857;GO:0005634;GO:0005634;GO:0005634;GO:0005634;GO:0005654;GO:0005654;GO:0005737;GO:0005737;GO:0005737;GO:0005737;GO:0005739;GO:0005739;GO:0005829;GO:0005829;GO:0005829;GO:0006281;GO:0006302;GO:0006302;GO:0006302;GO:0006471;GO:0006471;GO:0006974;GO:…	K15260	EC:2.4.2.30	K;L;B	0VB7Q;KOG2633;1CWU7;0DMYD;0UR6C;0A0BJ;1B1IR;13JCG;18S0H	poly (ADP-ribose) polymerase family, member 9 [Source:MGI Symbol;Acc:MGI:1933117]	80285	Q8CAS9
ENSMUSG00000040943	3193.32	862.34	5524.31	6.40618	2.67946	9.38275e-48	5.33854e-46	3	133169440	133250900	-	16870	Tet2	GO:0001822;GO:0002318;GO:0003677;GO:0005515;GO:0005634;GO:0005634;GO:0005654;GO:0006211;GO:0006211;GO:0006211;GO:0006325;GO:0006493;GO:0006493;GO:0007049;GO:0008198;GO:0008198;GO:0008270;GO:0008270;GO:0009791;GO:0016491;GO:0019857;GO:0019858;GO:0020027;GO:0030097;GO:0030099;GO:0030099;GO:0030099;GO:0035511;GO:0045944;GO:0045944;GO:0045944;GO:0046872;GO:0048536;GO:0048872;GO:0051213;GO:0055114;GO:…	K24309	EC:1.14.11.-	S;K;B	12RI9;1CTWK;0UMTM;0V8Q6;09XSP;0IE22;192DN;1B23D;0DJ4P	tet methylcytosine dioxygenase 2 [Source:MGI Symbol;Acc:MGI:2443298]	214133	Q4JK59
ENSMUSG00000005686	6801.5	1918.55	11684.5	6.09026	2.6065	1.01896e-47	5.77564e-46	7	110367413	110411612	+	5627	Ampd3	GO:0003876;GO:0003876;GO:0003876;GO:0003876;GO:0003876;GO:0005829;GO:0006188;GO:0006188;GO:0006196;GO:0009117;GO:0009168;GO:0016787;GO:0019239;GO:0032264;GO:0032264;GO:0034101;GO:0046031;GO:0046031;GO:0046033;GO:0046033;GO:0046033;GO:0046034;GO:0046034;GO:0046039;GO:0046872;GO:0097009;GO:0003876;GO:0003876;GO:0009168;GO:0016787;GO:0019239;GO:0032264;GO:0032264;GO:0046872;GO:0003876;GO:0003876;GO:…	K01490	EC:3.5.4.6	F	KOG1096;0V4C6;12PUK;0DG0K;1CX9I;0URR7;09UQP;1B370;1918F	adenosine monophosphate deaminase 3 [Source:MGI Symbol;Acc:MGI:1096344]	11717	O08739
ENSMUSG00000031488	5308.93	164.219	10453.6	63.6567	5.99224	1.34079e-47	7.57116e-46	8	27628801	27664674	-	10800	Rab11fip1	GO:0005768;GO:0005829;GO:0015031;GO:0016020;GO:0043231;GO:0070164;GO:0005768;GO:0005829;GO:0015031;GO:0016020;GO:0030670;GO:0031267;GO:0031410;GO:0043231;GO:0043231;GO:0045055;GO:0055037;GO:0070164;	K12484	-	S;U	0DGS4;13IMZ;0IGQZ;0VFEU;18UGK;1CRG7;0UFVX;1AU5G;0A3X9	RAB11 family interacting protein 1 (class I) [Source:MGI Symbol;Acc:MGI:1923017]	75767	Q9D620
ENSMUSG00000032741	999.906	1783.82	215.995	0.121086	-3.0459	1.41311e-47	7.94953e-46	5	120672218	120726738	-	8462	Tpcn1	GO:0005216;GO:0005244;GO:0005245;GO:0005248;GO:0005262;GO:0005764;GO:0005765;GO:0005765;GO:0005765;GO:0005765;GO:0005768;GO:0006811;GO:0006811;GO:0006816;GO:0010008;GO:0010008;GO:0010008;GO:0010008;GO:0010508;GO:0010508;GO:0015280;GO:0016020;GO:0016020;GO:0016021;GO:0034765;GO:0035725;GO:0042802;GO:0042802;GO:0042803;GO:0051209;GO:0055085;GO:0070588;GO:0072345;GO:0072345;GO:0072345;GO:0072345;GO:…	K16896	-	P	0INF7;13BJI;0V2SR;1BAR7;0B3I4;0E7Q8;0WFXF;1DEQB;19727	two pore channel 1 [Source:MGI Symbol;Acc:MGI:2182472]	252972	Q9EQJ0
ENSMUSG00000037697	2036.04	525.594	3546.48	6.74756	2.75437	1.61964e-47	9.07727e-46	14	45825924	45895600	-	14076	Ddhd1	GO:0046872;GO:0046872;GO:0090141;GO:0046872;GO:0046872;	K13619	EC:3.1.1.-	I;U	12QAH;0DMNP;KOG2308;0UNJF;0V4H8;1B2UU;18ZU6;1CWI5;09TIA	DDHD domain containing 1 [Source:MGI Symbol;Acc:MGI:2150302]	114874	Q80YA3
ENSMUSG00000041153	1009.25	225.839	1792.65	7.93776	2.98873	2.05764e-47	1.1489e-45	4	15997121	16013888	-	5571	Osgin2	GO:0005575;GO:0007165;GO:0008083;GO:0030308;GO:0005575;GO:0007165;GO:0008083;GO:0030308;	-	-	T	1ASZE;0DHDJ;12QIZ;09W4G;0UHC4;0V72U;0IF6I;18YR8;1CS3T	oxidative stress induced growth inhibitor family member 2 [Source:MGI Symbol;Acc:MGI:2384798]	209212	-
ENSMUSG00000022408	275.01	532.924	17.0967	0.032081	-4.96214	2.58044e-47	1.43545e-45	15	80556048	80584626	+	2993	Fam83f	-	K23930	-	S	1CT5C;09X3S;0IJIT;0DIET;13MAU;18TXF;0US88;0V82A;1AXYD	family with sequence similarity 83, member F [Source:MGI Symbol;Acc:MGI:2146227]	213956	Q3UKU4;A0A0R4J033
ENSMUSG00000039976	608.332	1109.98	106.689	0.0961185	-3.37904	3.74104e-47	2.07337e-45	11	119033871	119119325	-	7119	Tbc1d16	GO:0001919;GO:0001919;GO:0001919;GO:0005096;GO:0005096;GO:0005096;GO:0005096;GO:0005769;GO:0005769;GO:0005769;GO:0005769;GO:0005829;GO:0005829;GO:0005829;GO:0006886;GO:0031267;GO:0090630;GO:0001919;GO:0005096;GO:0005096;GO:0005769;GO:0005769;GO:0005829;GO:0006886;GO:0031267;GO:0090630;GO:0001919;GO:0005096;GO:0005096;GO:0005769;GO:0005769;GO:0005829;GO:0006886;GO:0031267;GO:0090630;	K24797	-	T	18TRM;0VBDS;0A0HN;12SVF;0DN4M;KOG2224;1CU0Q;0URDN;1B33H	TBC1 domain family, member 16 [Source:MGI Symbol;Acc:MGI:2652878]	207592	Q6PFC0
ENSMUSG00000029050	1672.26	2927.19	417.333	0.142571	-2.81025	4.38096e-47	2.41907e-45	4	155238532	155307049	-	5562	Ski	GO:0006351;GO:0046332;GO:0000122;GO:0001227;GO:0005634;GO:0005654;GO:0005813;GO:0006351;GO:0008270;GO:0008285;GO:0010626;GO:0014902;GO:0016604;GO:0016605;GO:0019901;GO:0019904;GO:0030512;GO:0030514;GO:0031625;GO:0032926;GO:0032991;GO:0042802;GO:0043388;GO:0045668;GO:0046332;GO:0046332;GO:0060395;GO:0070491;	-	-	K	12TFK;0A15U;0VC1Z;0DNTQ;1CXR1;0UTY1;0IFDK;18XXZ;1AYQW	ski sarcoma viral oncogene homolog (avian) [Source:MGI Symbol;Acc:MGI:98310]	20481	-
ENSMUSG00000038151	2533.71	676.082	4391.34	6.49527	2.69939	5.36515e-47	2.95162e-45	10	44313173	44404497	-	5579	Prdm1	GO:0000122;GO:0000122;GO:0000978;GO:0000978;GO:0001227;GO:0001701;GO:0001763;GO:0001822;GO:0001892;GO:0001893;GO:0002250;GO:0002376;GO:0003170;GO:0003279;GO:0003281;GO:0003677;GO:0003700;GO:0003700;GO:0005515;GO:0005515;GO:0005634;GO:0005634;GO:0005634;GO:0005634;GO:0005737;GO:0005737;GO:0005737;GO:0005737;GO:0006357;GO:0007275;GO:0007281;GO:0008168;GO:0009791;GO:0010468;GO:0010628;GO:0010629;GO:…	K24501	EC:2.1.1.-	K	1AYPE;12RIQ;0URIG;1CWT5;0A0FY;0DMXD;18TX7;KOG2461;0VBC3	PR domain containing 1, with ZNF domain [Source:MGI Symbol;Acc:MGI:99655]	12142	Q60636
ENSMUSG00000021384	319.048	605.831	32.2656	0.0532585	-4.23084	8.51361e-47	4.66658e-45	13	49384166	49402182	-	2837	Susd3	GO:0003674;GO:0005886;GO:0005886;GO:0005886;GO:0005886;GO:0008150;GO:0016020;GO:0016021;GO:0003674;GO:0005886;GO:0005886;GO:0005886;GO:0008150;GO:0016020;GO:0016021;GO:0016020;GO:0016021;GO:0003674;GO:0005886;GO:0005886;GO:0005886;GO:0008150;GO:0016020;GO:0016021;	K23821	-	S	0IY2S;1CU7E;0UGN6;09Y1V;18T29;0DJEV;13MIT;1ASD3;0V8ZC	sushi domain containing 3 [Source:MGI Symbol;Acc:MGI:1913579]	66329	Q9D176
ENSMUSG00000025375	551.418	1010.63	92.2032	0.0912331	-3.4543	8.63975e-47	4.71844e-45	11	119898139	119937993	-	7159	Aatk	GO:0004672;GO:0004713;GO:0005524;GO:0006468;GO:0018108;GO:0004672;GO:0004713;GO:0005524;GO:0006468;GO:0018108;GO:0004672;GO:0004713;GO:0005524;GO:0006468;GO:0018108;GO:0004672;GO:0005524;GO:0006468;	K17480	EC:2.7.10.1	T	0IGQE;09T8X;18UAM;13ITK;0UIII;1B2P4;0DEK3;0V47W;1CPA0	apoptosis-associated tyrosine kinase [Source:MGI Symbol;Acc:MGI:1197518]	11302	Q80YE4;B1AZF3
ENSMUSG00000061731	1866.67	392.069	3341.26	8.52212	3.09121	9.17018e-47	4.98991e-45	15	52927434	53209555	-	8077	Ext1	GO:0000139;GO:0000902;GO:0001503;GO:0001503;GO:0001958;GO:0001974;GO:0002062;GO:0002067;GO:0002524;GO:0003128;GO:0003416;GO:0005783;GO:0005783;GO:0005783;GO:0005783;GO:0005789;GO:0005794;GO:0005794;GO:0005794;GO:0005794;GO:0006024;GO:0006024;GO:0006486;GO:0006486;GO:0007033;GO:0007155;GO:0007166;GO:0007224;GO:0007369;GO:0007411;GO:0007420;GO:0007420;GO:0007492;GO:0007498;GO:0008217;GO:0008283;GO:…	K02366	-	W;M;G	0DNI8;13IVC;18YEB;KOG1021;1D09N;0UTHE;0V6K6;09VM2;1AY6W	exostosin glycosyltransferase 1 [Source:MGI Symbol;Acc:MGI:894663]	14042	P97464;Q3V1P4
ENSMUSG00000068566	6495.25	1864.83	11125.7	5.96604	2.57677	1.20078e-46	6.5103e-45	7	3337605	3348958	+	4479	Myadm	GO:0001726;GO:0001933;GO:0005886;GO:0005886;GO:0005911;GO:0005911;GO:0010629;GO:0016020;GO:0016020;GO:0016021;GO:0030335;GO:0030837;GO:0030864;GO:0031579;GO:0034115;GO:0034115;GO:0045121;GO:0061028;GO:0072659;GO:0090038;GO:1900026;GO:0001726;GO:0001933;GO:0005886;GO:0005886;GO:0005911;GO:0005911;GO:0010629;GO:0016020;GO:0016020;GO:0016021;GO:0030335;GO:0030837;GO:0030864;GO:0031579;GO:0034115;GO:…	-	-	V	KOG4788;0UKN4;1CXIG;0DNM7;18UME;13HUQ;0A0ZP;1AWGF;0VBW6	myeloid-associated differentiation marker [Source:MGI Symbol;Acc:MGI:1355332]	50918	O35682;Q0VE46
ENSMUSG00000024308	8245.59	1565.61	14925.6	9.53342	3.25299	1.26518e-46	6.83473e-45	17	34134873	34148266	+	3628	Tapbp	GO:0002397;GO:0016020;GO:0016020;GO:0016021;GO:0019885;GO:0042824;GO:0062061;GO:0065003;GO:0000139;GO:0002398;GO:0002479;GO:0005515;GO:0005783;GO:0005789;GO:0005789;GO:0005887;GO:0006952;GO:0010468;GO:0016020;GO:0016020;GO:0016021;GO:0019885;GO:0030670;GO:0042824;GO:0046978;GO:0046979;GO:0050823;GO:0061635;GO:0062061;GO:0065003;	K08058	-	U	0VEP4;0II43;1ASXK;1D0KM;0DQWW;0UU10;18W5I;09XFN;13IBE	TAP binding protein [Source:MGI Symbol;Acc:MGI:1201689]	21356	Q9R233;Q3U9A3;Q8C6N4;Q9D679
ENSMUSG00000022255	7044.76	2048.17	12041.4	5.87908	2.55559	2.13544e-46	1.14945e-44	15	34082840	34145770	+	15347	Mtdh	GO:0000122;GO:0000122;GO:0000122;GO:0001085;GO:0001085;GO:0001085;GO:0001650;GO:0001650;GO:0003712;GO:0003713;GO:0003713;GO:0003725;GO:0003725;GO:0005515;GO:0005515;GO:0005634;GO:0005634;GO:0005634;GO:0005634;GO:0005730;GO:0005737;GO:0005737;GO:0005737;GO:0005783;GO:0005783;GO:0005783;GO:0005789;GO:0005789;GO:0005923;GO:0005923;GO:0005923;GO:0006357;GO:0010508;GO:0010508;GO:0016020;GO:0016021;GO:…	-	-	T;V	12PEU;1AXZQ;0V7JM;1D02Q;192SC;0IIV9;0UFST;0DQYG;0A38N	metadherin [Source:MGI Symbol;Acc:MGI:1914404]	67154	Q80WJ7
ENSMUSG00000049401	3028.34	837.842	5218.83	6.2289	2.63898	3.0394e-46	1.63017e-44	2	180231038	180237629	+	2580	Ogfr	GO:0004985;GO:0005634;GO:0005737;GO:0016020;GO:0038003;GO:0038023;GO:0040008;	-	-	K	09WNP;18S2M;0UJC4;1AZGB;12R0H;0DJC0;1CU47;0V8WT;0IH5X	opioid growth factor receptor [Source:MGI Symbol;Acc:MGI:1919325]	72075	Q99PG2
ENSMUSG00000020641	42826.2	170.939	85481.4	500.069	8.96598	4.23391e-46	2.26272e-44	12	26492745	26506451	-	4335	Rsad2	GO:0001503;GO:0001650;GO:0002376;GO:0003674;GO:0003824;GO:0005515;GO:0005739;GO:0005739;GO:0005741;GO:0005743;GO:0005783;GO:0005783;GO:0005783;GO:0005783;GO:0005789;GO:0005789;GO:0005811;GO:0009615;GO:0009615;GO:0016020;GO:0030278;GO:0034157;GO:0034165;GO:0035710;GO:0043367;GO:0043621;GO:0043621;GO:0045071;GO:0045071;GO:0045087;GO:0046872;GO:0050709;GO:0050709;GO:0050778;GO:0051536;GO:0051536;GO:…	K15045	-	T	12T31;0V8TS;18XI7;0IGZE;09XW8;1CU0T;0DJ8V;0UKZM;1AT32	radical S-adenosyl methionine domain containing 2 [Source:MGI Symbol;Acc:MGI:1929628]	58185	Q8CBB9
ENSMUSG00000035042	11432.2	13.5169	22850.8	1690.54	10.7233	5.31215e-46	2.82886e-44	11	83416604	83421344	-	960	Ccl5	GO:0000165;GO:0002230;GO:0002548;GO:0004435;GO:0004672;GO:0005125;GO:0005515;GO:0005576;GO:0005576;GO:0005615;GO:0005615;GO:0005615;GO:0005737;GO:0006816;GO:0006874;GO:0006887;GO:0006935;GO:0006954;GO:0006954;GO:0006954;GO:0006955;GO:0007159;GO:0007159;GO:0007165;GO:0007186;GO:0007186;GO:0007186;GO:0007267;GO:0007267;GO:0008009;GO:0008009;GO:0008009;GO:0008009;GO:0008201;GO:0009636;GO:0010628;GO:…	K12499	-	T;V	0A9BH;0VK8C;1D4V5;1B6N1;0J0XH;0DVII;193QG;0UWA5;13UMY	chemokine (C-C motif) ligand 5 [Source:MGI Symbol;Acc:MGI:98262]	20304	P30882;Q5XZF2
ENSMUSG00000024535	402.828	751.011	54.6445	0.0727612	-3.78069	6.64001e-46	3.52344e-44	18	53378734	53523992	+	2456	Snx24	GO:0005575;GO:0008150;GO:0008289;GO:0010314;GO:0015031;GO:0016020;GO:0030659;GO:0031410;GO:0032266;GO:0035091;GO:0070273;GO:1901981;GO:0005575;GO:0008150;GO:0008289;GO:0010314;GO:0015031;GO:0016020;GO:0030659;GO:0031410;GO:0032266;GO:0035091;GO:0070273;GO:1901981;	K17941	-	U	0IMHV;1BAMM;13ATT;0WFER;0B336;1970C;1DEGP;0E7FR;0V2MX	sorting nexing 24 [Source:MGI Symbol;Acc:MGI:1916476]	69226	Q9CRB0
ENSMUSG00000001542	4637.54	862.884	8412.21	9.74894	3.28525	6.70711e-46	3.54647e-44	13	75854876	75920483	+	9828	Ell2	GO:0005634;GO:0005654;GO:0005654;GO:0006368;GO:0006368;GO:0008023;GO:0008023;GO:0008023;GO:0008023;GO:0032968;GO:0042795;GO:0042795;GO:0042795;GO:0006368;GO:0008023;GO:0006368;GO:0008023;GO:0006368;GO:0008023;GO:0006368;GO:0008023;GO:0006368;GO:0008023;	K15183	-	K	0UN8I;0DJM0;KOG4796;1B2VD;1CUDU;0V93M;13FCK;09Y7I;1900S	elongation factor for RNA polymerase II 2 [Source:MGI Symbol;Acc:MGI:2183438]	192657	Q3UKU1
ENSMUSG00000051343	1510.55	2640.35	380.76	0.144208	-2.79377	9.68004e-46	5.10043e-44	6	85311944	85351616	-	6124	Rab11fip5	GO:0000139;GO:0005737;GO:0005739;GO:0005739;GO:0005739;GO:0005741;GO:0005741;GO:0005768;GO:0005769;GO:0005769;GO:0005794;GO:0015031;GO:0016020;GO:0030141;GO:0030141;GO:0030658;GO:0031267;GO:0031410;GO:0031901;GO:0031966;GO:0034451;GO:0035773;GO:0043015;GO:0043015;GO:0043231;GO:0043231;GO:0045055;GO:0045055;GO:0045335;GO:0045335;GO:0055037;GO:0055037;GO:0055038;GO:0070164;GO:0071346;GO:0071468;GO:…	K12484	-	S;U	0VAWF;1CWEJ;1B1XG;0UQS0;18WYP;13IQZ;0IJ70;09ZZP;0DMJA	RAB11 family interacting protein 5 (class I) [Source:MGI Symbol;Acc:MGI:1098586]	52055	Q8R361;Q6ZQ33
ENSMUSG00000022353	2072.05	3589.55	554.547	0.154489	-2.69442	1.58745e-45	8.33494e-44	15	58813083	58953854	-	11345	Mtss1	GO:0003779;GO:0003785;GO:0005102;GO:0007009;GO:0015629;GO:0030036;GO:0042802;GO:0003779;GO:0030036;GO:0003779;GO:0030036;GO:0003779;GO:0007009;GO:0030036;	K20128	-	Z;S	09TS1;192GU;1CPS7;0IGVU;0DF2F;1AVBX;0V4RB;12T1B;0UKA3	MTSS I-BAR domain containing 1 [Source:MGI Symbol;Acc:MGI:2384818]	211401	Q8R1S4;G3X9H7;Q6ZQB7
ENSMUSG00000037321	5306.52	347.037	10266	29.5819	4.88664	1.62773e-45	8.51653e-44	17	34406527	34416199	+	5476	Tap1	GO:0000166;GO:0000166;GO:0002250;GO:0002376;GO:0002479;GO:0005524;GO:0005524;GO:0005524;GO:0005524;GO:0005739;GO:0005783;GO:0005783;GO:0005783;GO:0005789;GO:0006952;GO:0015031;GO:0015433;GO:0015433;GO:0015433;GO:0015433;GO:0015440;GO:0015833;GO:0015833;GO:0015833;GO:0015833;GO:0015833;GO:0016020;GO:0016020;GO:0016021;GO:0016021;GO:0016021;GO:0016021;GO:0016021;GO:0016887;GO:0016887;GO:0019885;GO:…	K05653	-	Q;U	KOG0058;09UWX;0UKTV;0V5WR;18U06;1AVK0;1CU6J;12RBY;0DG6C	transporter 1, ATP-binding cassette, sub-family B (MDR/TAP) [Source:MGI Symbol;Acc:MGI:98483]	21354	P21958;Q3U6V4
ENSMUSG00000024732	1517.9	392.021	2643.78	6.74398	2.7536	2.70044e-45	1.40799e-43	19	10918845	10926630	-	5774	Ccdc86	GO:0005634;GO:0005634;GO:0005654;GO:0005654;GO:0005694;GO:0005730;GO:0005730;GO:0005730;	K14822	-	S	0VFSG;13W7I;1AS7H;KOG4538;0DSCT;1D1N8;0UFYK;18UHE;0A41T	coiled-coil domain containing 86 [Source:MGI Symbol;Acc:MGI:1277220]	108673	Q9JJ89
ENSMUSG00000028773	952.046	220.794	1683.3	7.62385	2.93052	2.80059e-45	1.45514e-43	4	130202388	130209256	+	823	Fabp3	GO:0005324;GO:0005324;GO:0005504;GO:0005504;GO:0005615;GO:0005615;GO:0005615;GO:0005737;GO:0005737;GO:0005737;GO:0005829;GO:0005829;GO:0005829;GO:0006631;GO:0008092;GO:0008092;GO:0008289;GO:0008289;GO:0015909;GO:0015909;GO:0015909;GO:0016528;GO:0016528;GO:0032365;GO:0032868;GO:0036041;GO:0036041;GO:0042493;GO:0042632;GO:0046320;GO:0050543;GO:0050543;GO:0050873;GO:0055091;GO:0070538;GO:0070538;GO:…	K08752	-	I	1D34F;0UV51;0A6SZ;KOG4015;13QJM;0DTSF;1B5SG;0VHKT;1935T	fatty acid binding protein 3, muscle and heart [Source:MGI Symbol;Acc:MGI:95476]	14077	P11404;Q5EBJ0
ENSMUSG00000027555	2424.15	502.334	4345.97	8.65154	3.11296	2.8895e-45	1.49614e-43	3	14706787	14728062	+	2299	Car13	GO:0004089;GO:0004089;GO:0004089;GO:0004089;GO:0005737;GO:0005829;GO:0005829;GO:0006730;GO:0008270;GO:0016829;GO:0016836;GO:0043209;GO:0043231;GO:0046872;	K01672	EC:4.2.1.1	P	1CV4N;13HPY;18UQ4;0VC0Y;KOG0382;0UGEK;0A14P;0DNSM;1B4H3	carbonic anhydrase 13 [Source:MGI Symbol;Acc:MGI:1931322]	71934	Q9D6N1
ENSMUSG00000020883	797.335	1426.02	168.648	0.118265	-3.07991	3.18768e-45	1.64484e-43	11	97973382	98041229	-	12106	Fbxl20	GO:0001662;GO:0005515;GO:0005737;GO:0019005;GO:0031146;GO:0045202;GO:0098685;GO:0098793;GO:0098978;GO:0099575;GO:2000300;	K10268	-	S;T	09W7V;0V767;KOG4341;0UKHN;1AX9U;0DHGX;12PS1;18Y7I;1CS79	F-box and leucine-rich repeat protein 20 [Source:MGI Symbol;Acc:MGI:1919444]	72194	Q9CZV8
ENSMUSG00000024981	3956.48	1140.32	6772.64	5.93926	2.57028	3.46944e-45	1.78408e-43	19	55240370	55286152	+	4864	Acsl5	GO:0016020;GO:0016021;GO:0009758;GO:0016020;GO:0016021;GO:0050053;GO:0000166;GO:0001676;GO:0001676;GO:0001676;GO:0001676;GO:0004467;GO:0004467;GO:0004467;GO:0004467;GO:0005524;GO:0005654;GO:0005654;GO:0005730;GO:0005730;GO:0005739;GO:0005739;GO:0005739;GO:0005739;GO:0005741;GO:0005743;GO:0005783;GO:0005783;GO:0005783;GO:0005783;GO:0005789;GO:0005886;GO:0005886;GO:0005886;GO:0006629;GO:0006631;GO:…	K01897	EC:6.2.1.3	I	1B4QD;0V4XT;1CPJ2;KOG1256;18XUN;0UGR1;0DJJS;12PYZ;09TYX	acyl-CoA synthetase long-chain family member 5 [Source:MGI Symbol;Acc:MGI:1919129]	433256	Q8JZR0;Q3UC67
ENSMUSG00000024966	3084.91	874.217	5295.6	6.05754	2.59873	4.65036e-45	2.38315e-43	19	6998070	7017335	-	2108	Stip1	GO:0005515;GO:0005634;GO:0005737;GO:0005829;GO:0008022;GO:0008022;GO:0030544;GO:0030544;GO:0032991;GO:0032991;GO:0032991;GO:0043209;GO:0051087;GO:0051087;GO:0051879;GO:0051879;GO:0051879;GO:0098761;GO:0101031;GO:0101031;	K09553	-	O	12N8B;1917T;1CY0H;KOG0548;0DP2J;09V7J;0V674;1AW9D;0URK7	stress-induced phosphoprotein 1 [Source:MGI Symbol;Acc:MGI:109130]	20867	Q60864
ENSMUSG00000034247	4303.62	7349.66	1257.58	0.171108	-2.54702	6.67468e-45	3.40887e-43	11	103255101	103303513	-	5968	Plekhm1	GO:0005515;GO:0005515;GO:0005730;GO:0005737;GO:0005764;GO:0005765;GO:0005768;GO:0006914;GO:0010008;GO:0015031;GO:0016020;GO:0032418;GO:0035556;GO:0043231;GO:0045780;GO:0046872;GO:1900029;	K23282	-	T	0KDQT;0WD89;1BA8W;196W7;14TY2;0B0QY;1DD3P;0E64E;0V1H1	pleckstrin homology domain containing, family M (with RUN domain) member 1 [Source:MGI Symbol;Acc:MGI:2443207]	353047	Q7TSI1
ENSMUSG00000020034	265.769	508.482	23.0563	0.0453434	-4.46296	1.16995e-44	5.95482e-43	10	84412490	84450223	+	3438	Tcp11l2	GO:0003674;GO:0005575;GO:0007165;	-	-	T	0DHA4;1B0FX;09U6Y;18ZAH;0V562;KOG1981;12NJX;1CTHS;0UFK1	t-complex 11 (mouse) like 2 [Source:MGI Symbol;Acc:MGI:2444679]	216198	Q8K1H7
ENSMUSG00000022885	476.774	875.252	78.2957	0.0894551	-3.48269	1.84351e-44	9.35128e-43	16	23043490	23179100	+	4916	St6gal1	GO:0000138;GO:0000139;GO:0000139;GO:0000139;GO:0003835;GO:0003835;GO:0003835;GO:0003835;GO:0005576;GO:0005783;GO:0005794;GO:0005797;GO:0006054;GO:0006054;GO:0006054;GO:0006486;GO:0006486;GO:0006486;GO:0008373;GO:0008373;GO:0008373;GO:0016020;GO:0016021;GO:0016740;GO:0016757;GO:0018279;GO:0018279;GO:0018279;GO:0032580;GO:0032946;GO:0042803;GO:0042803;GO:0042803;GO:0050922;GO:0097503;GO:0097503;GO:…	K00778	EC:2.4.99.1	G	0DGM7;0VCMN;0A32H;1AWXY;12RUZ;1CQ12;0US74;18YM1;KOG2692	beta galactoside alpha 2,6 sialyltransferase 1 [Source:MGI Symbol;Acc:MGI:108470]	20440	Q64685;Q8BM62
ENSMUSG00000039191	1254.82	281.691	2227.95	7.9092	2.98353	2.65479e-44	1.3421e-42	5	53623494	53814704	+	12750	Rbpj	GO:0001228;GO:0003677;GO:0003700;GO:0005634;GO:0006355;GO:0006357;GO:0045944;GO:0000978;GO:0001228;GO:0003677;GO:0003677;GO:0003700;GO:0005634;GO:0005634;GO:0006355;GO:0006357;GO:0045944;GO:0000122;GO:0000122;GO:0000122;GO:0000785;GO:0000978;GO:0000978;GO:0000978;GO:0000978;GO:0000981;GO:0001103;GO:0001103;GO:0001228;GO:0001228;GO:0001228;GO:0001228;GO:0001525;GO:0001756;GO:0001756;GO:0001837;GO:…	K06053	-	K	KOG3743;1ASFM;12T7Q;0V54V;1CQ58;09U5V;0UFH9;0DFFF;18TBJ	recombination signal binding protein for immunoglobulin kappa J region [Source:MGI Symbol;Acc:MGI:96522]	19664	P31266
ENSMUSG00000026875	6433.15	60.8054	12805.5	210.598	7.71835	3.21994e-44	1.62233e-42	2	34831762	34851784	-	8819	Traf1	GO:0005164;GO:0005164;GO:0005164;GO:0005164;GO:0005515;GO:0005515;GO:0005515;GO:0005737;GO:0006915;GO:0007165;GO:0008270;GO:0009898;GO:0031625;GO:0031625;GO:0031625;GO:0031996;GO:0031996;GO:0033209;GO:0042802;GO:0042802;GO:0042981;GO:0043122;GO:0046330;GO:0051092;GO:0051092;GO:0070534;GO:2001236;GO:2001236;GO:0005164;GO:0005164;GO:0005164;GO:0005515;GO:0005515;GO:0005515;GO:0005737;GO:0006915;GO:…	K03172	-	T	0B5NE;0V3IZ;1BBA8;0WIAG;1DFWW;0ISDN;197CD;13EZK;0E90Q	TNF receptor-associated factor 1 [Source:MGI Symbol;Acc:MGI:101836]	22029	P39428
ENSMUSG00000022272	6581.97	1996.5	11167.4	5.5935	2.48375	7.45921e-44	3.74563e-42	15	25622611	25813759	+	10122	Myo10	GO:0000166;GO:0001726;GO:0001726;GO:0003774;GO:0003779;GO:0005515;GO:0005516;GO:0005524;GO:0005524;GO:0005547;GO:0005730;GO:0005730;GO:0005737;GO:0005829;GO:0005829;GO:0005829;GO:0005856;GO:0005856;GO:0005886;GO:0005886;GO:0005886;GO:0005938;GO:0008360;GO:0008360;GO:0016020;GO:0016459;GO:0016459;GO:0022409;GO:0030027;GO:0030027;GO:0030175;GO:0030507;GO:0030705;GO:0030898;GO:0031527;GO:0032433;GO:…	K12559	-	Z	1CSXV;0V4MW;1B56K;0UUKB;12NAI;KOG4229;09TNR;18T82;0DJTZ	myosin X [Source:MGI Symbol;Acc:MGI:107716]	17909	F8VQB6;Q80TR9
ENSMUSG00000030790	131.894	3.25638	260.532	80.0066	6.32205	2.03471e-43	1.01831e-41	7	110226868	110229027	+	1619	Adm	GO:0001570;GO:0001570;GO:0001666;GO:0001843;GO:0002026;GO:0002026;GO:0002031;GO:0002031;GO:0003073;GO:0003073;GO:0005179;GO:0005179;GO:0005576;GO:0005576;GO:0005615;GO:0005615;GO:0005615;GO:0005737;GO:0005737;GO:0007189;GO:0007189;GO:0007204;GO:0007204;GO:0007507;GO:0007507;GO:0007565;GO:0007568;GO:0008209;GO:0008209;GO:0008284;GO:0008285;GO:0008285;GO:0009409;GO:0009611;GO:0009611;GO:0010033;GO:…	K12333	-	W;T	1CVUC;0IK4C;19380;0DR8J;0VEGM;13HJB;1ARV1;0A3MP;0UG9X	adrenomedullin [Source:MGI Symbol;Acc:MGI:108058]	11535	P97297
ENSMUSG00000025969	27455.5	8663.92	46247.1	5.3379	2.41627	2.21892e-43	1.1068e-41	1	62742444	62857854	+	11842	Nrp2	GO:0001525;GO:0001755;GO:0001764;GO:0003148;GO:0005021;GO:0005515;GO:0005515;GO:0005886;GO:0005886;GO:0007275;GO:0007399;GO:0007411;GO:0007411;GO:0007507;GO:0008201;GO:0016020;GO:0016020;GO:0016021;GO:0017154;GO:0017154;GO:0021612;GO:0021649;GO:0021675;GO:0021828;GO:0030154;GO:0030424;GO:0036486;GO:0038084;GO:0042802;GO:0046872;GO:0048846;GO:0050919;GO:0061549;GO:0061551;GO:0097374;GO:0097490;GO:…	K06819	-	W;T	0UKBY;1CSQH;0IHB5;0V7NM;1AZ3J;13HQ1;18V4I;09WQ4;0DHZV	neuropilin 2 [Source:MGI Symbol;Acc:MGI:1100492]	18187	O35375;Q3U5I8
ENSMUSG00000039841	3283.88	284.631	6283.12	22.0747	4.46432	2.382e-43	1.18419e-41	6	28239926	28398004	-	4831	Zfp800	GO:0003677;GO:0005634;GO:0008150;GO:0046872;GO:0003677;GO:0005634;GO:0008150;GO:0046872;GO:0003677;GO:0005634;GO:0008150;GO:0046872;GO:0005634;	-	-	K	1ARF6;0VB73;12SQ4;1CWTN;0DMXS;0A0B0;KOG1721;0UFJA;18S5X	zinc finger protein 800 [Source:MGI Symbol;Acc:MGI:1889334]	627049	Q0VEE6;B7ZMR9
ENSMUSG00000031584	4102.97	1238.67	6967.27	5.6248	2.4918	7.09987e-43	3.51796e-41	8	34142551	34188191	+	2754	Gsr	GO:0004362;GO:0004362;GO:0004362;GO:0004362;GO:0005737;GO:0005739;GO:0005739;GO:0005739;GO:0005829;GO:0005829;GO:0005829;GO:0006749;GO:0006749;GO:0006749;GO:0007283;GO:0009897;GO:0016491;GO:0016491;GO:0016668;GO:0034599;GO:0042802;GO:0043295;GO:0045454;GO:0045454;GO:0050660;GO:0050660;GO:0050660;GO:0050661;GO:0050661;GO:0055114;GO:0055114;GO:0098869;	K00383	EC:1.8.1.7	O;Q	KOG0405;1B39V;0DMWP;0V7S3;12PHT;18YVN;09WU3;1CWSE;0UR41	glutathione reductase [Source:MGI Symbol;Acc:MGI:95804]	14782	P47791
ENSMUSG00000047945	28787.9	252.493	57323.4	227.03	7.82674	7.93283e-43	3.91772e-41	4	129407374	129409778	+	1605	Marcksl1	GO:0003779;GO:0005516;GO:0005516;GO:0005737;GO:0005737;GO:0005856;GO:0005886;GO:0005886;GO:0005886;GO:0005886;GO:0007015;GO:0007417;GO:0008021;GO:0008284;GO:0016020;GO:0051015;GO:0099026;GO:0099509;GO:0099523;GO:0099626;	K13536	-	Z;T	0DSQI;1B34S;0A5BR;0UFPR;0V8IT;0IDYZ;1CYX1;12U8H;193FC	MARCKS-like 1 [Source:MGI Symbol;Acc:MGI:97143]	17357	P28667
ENSMUSG00000037972	822.293	196.184	1448.4	7.38287	2.88418	9.14853e-43	4.50325e-41	16	10878809	10892849	+	2967	Snn	GO:0005737;GO:0005739;GO:0005741;GO:0005741;GO:0008150;GO:0016020;GO:0016021;GO:0016021;GO:0016021;GO:0016021;GO:0046872;GO:0005737;GO:0005737;GO:0005739;GO:0005741;GO:0005741;GO:0008150;GO:0016020;GO:0016021;GO:0016021;GO:0016021;GO:0016021;GO:0016021;GO:0046872;GO:0046872;	-	-	U	193M2;1B6DA;0VJ4A;13T7F;1D45Q;0A88N;0IYFC;0DUUU;0UVSP	stannin [Source:MGI Symbol;Acc:MGI:1276549]	20621	P61807;Q5M8P0
ENSMUSG00000028771	3333.35	993.967	5672.72	5.70716	2.51277	9.50222e-43	4.66201e-41	5	21191643	21260909	-	3509	Ptpn12	GO:0002102;GO:0004721;GO:0004721;GO:0004721;GO:0004725;GO:0004725;GO:0004725;GO:0004725;GO:0004726;GO:0005515;GO:0005515;GO:0005515;GO:0005634;GO:0005737;GO:0005737;GO:0005829;GO:0005925;GO:0006470;GO:0006470;GO:0006470;GO:0016311;GO:0016787;GO:0016791;GO:0017124;GO:0017124;GO:0030054;GO:0035335;GO:0035335;GO:0035335;GO:0035335;GO:0042058;GO:0042058;GO:0042058;GO:0042058;GO:0042246;GO:0042995;GO:…	K18024	EC:3.1.3.48	T	1ASV7;0UH6T;KOG0789;0DGMB;1CRB6;09VCV;0V6BY;18WZ5;12P88	protein tyrosine phosphatase, non-receptor type 12 [Source:MGI Symbol;Acc:MGI:104673]	19248	P35831
ENSMUSG00000017765	1982.13	561.7	3402.56	6.0576	2.59875	1.09091e-42	5.33476e-41	8	106670222	106692729	-	4279	Slc12a4	GO:0006811;GO:0006811;GO:0006813;GO:0006884;GO:0007268;GO:0015293;GO:0015377;GO:0015379;GO:0015379;GO:0016020;GO:0016020;GO:0016021;GO:0016021;GO:0019901;GO:0022857;GO:0045202;GO:0055064;GO:0055075;GO:0055085;GO:0071805;GO:1902476;GO:1902476;GO:1990573;GO:0006811;GO:0006811;GO:0006813;GO:0015293;GO:0015377;GO:0015379;GO:0016020;GO:0016020;GO:0016021;GO:0016021;GO:0019901;GO:0022857;GO:0055085;GO:…	K14427	-	P	18XV2;1AUE8;KOG2082;0DITF;0UIXA;12RG5;1CTIT;0V4WR;09XFV	solute carrier family 12, member 4 [Source:MGI Symbol;Acc:MGI:1309465]	20498	Q9JIS8;Q3TWZ6
ENSMUSG00000041238	1053.22	267.27	1839.16	6.8813	2.78268	1.37373e-42	6.69594e-41	18	11766333	11878278	+	12521	Rbbp8	GO:0000014;GO:0000014;GO:0000082;GO:0000403;GO:0000406;GO:0000724;GO:0000724;GO:0001103;GO:0001835;GO:0003677;GO:0003684;GO:0003684;GO:0003690;GO:0003697;GO:0003714;GO:0004518;GO:0004519;GO:0004519;GO:0005634;GO:0005634;GO:0005654;GO:0005654;GO:0005694;GO:0006281;GO:0006281;GO:0006974;GO:0007049;GO:0010792;GO:0010792;GO:0010792;GO:0016787;GO:0017053;GO:0032355;GO:0035861;GO:0042802;GO:0043231;GO:…	K20773	EC:3.1.-.-	K;B	18Y2F;09VS1;1ARE3;0UJ0N;0IJ39;0DH0K;13FN3;1CRQW;0V6QZ	retinoblastoma binding protein 8, endonuclease [Source:MGI Symbol;Acc:MGI:2442995]	225182	Q80YR6
ENSMUSG00000044629	292.099	556.504	27.694	0.0497641	-4.32875	1.54298e-42	7.49648e-41	11	17001586	17029371	+	4003	Cnrip1	GO:0005737;GO:0005886;GO:0008022;GO:0031718;GO:0005737;GO:0005886;GO:0005886;GO:0008022;GO:0010469;GO:0031718;GO:0031718;GO:0043209;GO:2000272;GO:2000272;	-	-	T	0UNYQ;1937H;0IK8D;0DM9M;0A1D0;0VEUT;13NZS;1B05S;1CW4S	cannabinoid receptor interacting protein 1 [Source:MGI Symbol;Acc:MGI:1917505]	380686	Q5M8N0
ENSMUSG00000078853	5157.09	124.839	10189.3	81.6199	6.35085	1.87571e-42	9.08354e-41	11	58090382	58098417	+	2022	Igtp	GO:0003924;GO:0003924;GO:0005525;GO:0005789;GO:0005829;GO:0006952;GO:0016020;GO:0035458;GO:0035458;GO:0003924;GO:0003924;GO:0005789;GO:0005829;GO:0006952;GO:0035458;GO:0035458;GO:0003924;GO:0003924;GO:0005789;GO:0005829;GO:0006952;GO:0035458;GO:0035458;	K14140	-	-	-	interferon gamma induced GTPase [Source:MGI Symbol;Acc:MGI:107729]	16145	Q9DCE9
ENSMUSG00000063234	1142.54	7.78386	2277.3	292.566	8.19262	2.29485e-42	1.10775e-40	15	103216662	103219039	-	1725	Gpr84	GO:0004930;GO:0004930;GO:0007186;GO:0007186;GO:0016020;GO:0016021;GO:0016021;	K08421	-	T	KOG3656;0DKBV;12RH3;18TUI;0V9UA;0UH8Z;1ASX2;09YWK;1CV5N	G protein-coupled receptor 84 [Source:MGI Symbol;Acc:MGI:1934129]	80910	Q8CIM5;A0A0R4J100
ENSMUSG00000018459	2005.33	207.181	3803.47	18.3582	4.19835	4.62952e-42	2.22753e-40	2	165246948	165315150	-	5215	Slc13a3	GO:0005310;GO:0005310;GO:0005343;GO:0005886;GO:0005886;GO:0005886;GO:0006811;GO:0006814;GO:0006835;GO:0006835;GO:0015137;GO:0015137;GO:0015139;GO:0015139;GO:0015141;GO:0015141;GO:0015141;GO:0015141;GO:0015183;GO:0015293;GO:0015362;GO:0015742;GO:0015744;GO:0015746;GO:0015746;GO:0015810;GO:0016020;GO:0016020;GO:0016020;GO:0016021;GO:0016021;GO:0016021;GO:0016323;GO:0016323;GO:0017153;GO:0017153;GO:…	K14445	-	P	0V512;195A0;12Q3H;0DFBW;0USYH;1CU0A;09U24;1AYJI;KOG1281	solute carrier family 13 (sodium-dependent dicarboxylate transporter), member 3 [Source:MGI Symbol;Acc:MGI:2149635]	114644	Q91Y63;Q3UUJ6
ENSMUSG00000055782	173.208	339.834	6.58202	0.0193683	-5.69016	4.97591e-42	2.38652e-40	15	91030074	91076002	-	5946	Abcd2	GO:0000038;GO:0000038;GO:0000166;GO:0005524;GO:0005524;GO:0005777;GO:0005777;GO:0006635;GO:0006635;GO:0016020;GO:0016021;GO:0016021;GO:0016887;GO:0032000;GO:0042626;GO:0042760;GO:0042803;GO:0055085;	K05676	-	Q;I	0UFQI;0DEQ8;09TCZ;1AY0J;1CPDZ;0V4C2;190X1;KOG0064;12NB6	ATP-binding cassette, sub-family D (ALD), member 2 [Source:MGI Symbol;Acc:MGI:1349467]	26874	Q61285;A0A0R4J0U5
ENSMUSG00000020901	17640.9	5698.81	29583	5.19108	2.37603	6.26987e-42	2.99752e-40	11	68322947	68388675	+	5550	Pik3r5	GO:0005634;GO:0005737;GO:0005829;GO:0005829;GO:0005829;GO:0005886;GO:0005942;GO:0005942;GO:0005942;GO:0005944;GO:0005944;GO:0007186;GO:0007186;GO:0014065;GO:0016020;GO:0016301;GO:0016310;GO:0031683;GO:0034451;GO:0034451;GO:0043406;GO:0043406;GO:0043551;GO:0043551;GO:0046935;GO:0046935;GO:0046935;GO:0046935;GO:0051897;	K21290	-	T	1CXP9;0UI6K;13JT6;18XEU;0VC07;0A13Y;0DKXE;1AZQY;0IES2	phosphoinositide-3-kinase regulatory subunit 5 [Source:MGI Symbol;Acc:MGI:2443588]	320207	Q5SW28;A1A4T4
ENSMUSG00000069662	7041.17	2110.64	11971.7	5.67206	2.50387	6.74787e-42	3.21577e-40	10	37009371	37014916	-	4048	Marcks	GO:0003779;GO:0005080;GO:0005516;GO:0005516;GO:0005516;GO:0005737;GO:0005737;GO:0005737;GO:0005813;GO:0005856;GO:0005886;GO:0005938;GO:0007015;GO:0007417;GO:0016020;GO:0016020;GO:0032432;GO:0032432;GO:0042585;GO:0042802;GO:0051015;GO:0051015;GO:0051017;GO:0051764;	K12561	-	Z;T	1D4ST;0UW6F;193TU;13U5Z;0DVD0;0A8YZ;1B6J2;0J04K;0VJVC	myristoylated alanine rich protein kinase C substrate [Source:MGI Symbol;Acc:MGI:96907]	17118	P26645
ENSMUSG00000029534	818.265	104.842	1531.69	14.6095	3.86884	8.06026e-42	3.82901e-40	6	17692932	17943024	+	9042	St7	GO:0016020;GO:0016021;GO:0016020;GO:0016021;GO:0016020;GO:0016021;GO:0016020;GO:0016021;GO:0016020;GO:0016021;GO:0016020;GO:0016021;GO:0016020;GO:0016021;GO:0016020;GO:0016021;GO:0016020;GO:0016021;GO:0016020;GO:0016021;GO:0016020;GO:0016021;GO:0016020;GO:0016021;	-	-	S	0V484;09T94;KOG3807;191VG;12NGW;0UFPB;1ARIT;0DEK9;1CPA7	suppression of tumorigenicity 7 [Source:MGI Symbol;Acc:MGI:1927450]	64213	Q99M96
ENSMUSG00000049800	1817.27	517.854	3116.68	6.01846	2.58939	8.78689e-42	4.16098e-40	11	20493253	20603021	+	6352	Sertad2	GO:0003713;GO:0005515;GO:0005634;GO:0005634;GO:0005634;GO:0005634;GO:0005654;GO:0005654;GO:0005737;GO:0005737;GO:0005829;GO:0005829;GO:0030308;GO:0030308;GO:0045893;GO:0048096;GO:0003713;GO:0005515;GO:0005634;GO:0005634;GO:0005634;GO:0005654;GO:0005737;GO:0005829;GO:0030308;GO:0045893;GO:0048096;GO:0003713;GO:0005515;GO:0005634;GO:0005634;GO:0005634;GO:0005654;GO:0005737;GO:0005829;GO:0030308;GO:…	-	-	K	0V9WS;1AYXU;1CV82;13IJF;18ZTW;09YZ3;0UMCU;0DKDY;0IEG3	SERTA domain containing 2 [Source:MGI Symbol;Acc:MGI:1931026]	58172	Q9JJG5;Q3UGZ1
ENSMUSG00000040479	4179.36	7061.05	1297.66	0.183777	-2.44397	1.03746e-41	4.89733e-40	2	91763169	91806209	-	6270	Dgkz	GO:0000166;GO:0004143;GO:0005524;GO:0007165;GO:0016301;GO:0016310;GO:0016740;GO:0000166;GO:0003951;GO:0004143;GO:0004143;GO:0005524;GO:0007165;GO:0007205;GO:0016301;GO:0016301;GO:0016310;GO:0016740;GO:0035556;GO:0046486;GO:0000166;GO:0001727;GO:0003951;GO:0004143;GO:0004143;GO:0004143;GO:0004143;GO:0004857;GO:0005515;GO:0005515;GO:0005524;GO:0005634;GO:0005634;GO:0005634;GO:0005737;GO:0005829;GO:…	K00901	EC:2.7.1.107	T;I	0V5GI;KOG0782;09W8Z;0DHIA;0UJQM;18W1X;1AU5A;1CS8I;12PSP	diacylglycerol kinase zeta [Source:MGI Symbol;Acc:MGI:1278339]	104418	Q80UP3
ENSMUSG00000050010	1186.69	1.531	2371.84	1549.21	10.5973	1.17093e-41	5.51e-40	5	67765225	67780895	+	4754	Shisa3	GO:0005783;GO:0005789;GO:0007275;GO:0016020;GO:0016021;GO:0090090;	-	-	U	18TMW;1CSUT;0V7SG;12Q4R;0UKH5;0IF26;0DI4D;09WUH;1ASYN	shisa family member 3 [Source:MGI Symbol;Acc:MGI:3041225]	330096	Q3UPR0
ENSMUSG00000042190	1308.4	357.197	2259.59	6.3259	2.66127	1.85987e-41	8.72449e-40	5	113750415	113788487	-	3408	Cmklr1	GO:0002430;GO:0004875;GO:0004930;GO:0004930;GO:0004930;GO:0005886;GO:0005886;GO:0005886;GO:0006935;GO:0006935;GO:0006954;GO:0007165;GO:0007186;GO:0007186;GO:0007186;GO:0007200;GO:0007204;GO:0010759;GO:0010759;GO:0016020;GO:0016021;GO:0016021;GO:0032088;GO:0032088;GO:0032695;GO:0045600;GO:0050848;GO:0050848;GO:0120162;GO:0004930;GO:0004930;GO:0005886;GO:0007165;GO:0007186;GO:0007186;GO:0016020;GO:…	K04245	-	T	09YRX;1CTRF;0DNT1;0II0H;1AY9T;0UUGE;13FV7;18VUS;0V7XT	chemokine-like receptor 1 [Source:MGI Symbol;Acc:MGI:109603]	14747	P97468;Q497D3
ENSMUSG00000059851	371.253	685.851	56.6548	0.0826051	-3.59762	2.88784e-41	1.35043e-39	7	4743114	4750513	+	4001	Kmt5c	GO:0000779;GO:0000792;GO:0003682;GO:0003682;GO:0005634;GO:0005634;GO:0005654;GO:0005694;GO:0005721;GO:0006281;GO:0006281;GO:0006325;GO:0008168;GO:0016571;GO:0016740;GO:0032259;GO:0034773;GO:0034773;GO:0034773;GO:0042393;GO:0042799;GO:0042799;GO:0042799;GO:0045830;GO:0046872;GO:1904047;GO:1904047;GO:2001034;GO:2001034;GO:0005634;GO:0005694;GO:0000779;GO:0000792;GO:0000792;GO:0003682;GO:0003682;GO:…	K11429	EC:2.1.1.362	B	0V8HX;09WCX;1CTP2;18ZE9;12QKP;0DIXK;0UHEM;1AS97;KOG2589	lysine methyltransferase 5C [Source:MGI Symbol;Acc:MGI:2385262]	232811	Q6Q783
ENSMUSG00000027009	9042.98	1776.88	16309.1	9.17851	3.19826	2.93229e-41	1.36694e-39	2	79085770	79163467	+	13978	Itga4	GO:0001968;GO:0002687;GO:0003366;GO:0003823;GO:0005886;GO:0005886;GO:0007155;GO:0007155;GO:0007159;GO:0007160;GO:0007229;GO:0008305;GO:0009986;GO:0009986;GO:0016020;GO:0016021;GO:0019960;GO:0030426;GO:0033631;GO:0034113;GO:0034446;GO:0034669;GO:0035987;GO:0043025;GO:0043113;GO:0050839;GO:0050839;GO:0050901;GO:0050904;GO:0060385;GO:0070062;GO:0071345;GO:0090074;GO:0098657;GO:0140039;GO:1903039;GO:…	K06483	-	W	1DEZB;0WGDJ;13CAV;0E7ZW;1974F;0B3YG;1BAVK;0IPB2;0V2YW	integrin alpha 4 [Source:MGI Symbol;Acc:MGI:96603]	16401	Q00651;Q792F9;Q8BQ25
ENSMUSG00000031609	2413.04	273.553	4552.53	16.6422	4.05678	3.93427e-41	1.82834e-39	8	57935741	57940894	-	1178	Sap30	GO:0000118;GO:0000118;GO:0000118;GO:0000122;GO:0003677;GO:0003712;GO:0003714;GO:0003714;GO:0005515;GO:0005515;GO:0005515;GO:0005634;GO:0005634;GO:0005654;GO:0005654;GO:0005654;GO:0006355;GO:0006355;GO:0006355;GO:0016580;GO:0035914;GO:0046872;	K19202	-	K	18YTE;0A1S9;0DPEF;0VCMY;1AVEV;0IHMG;12S0R;0UJNZ;1CX32	sin3 associated polypeptide [Source:MGI Symbol;Acc:MGI:1929129]	60406	O88574
ENSMUSG00000017119	1923.72	3287.32	560.127	0.17039	-2.55309	5.30868e-41	2.45941e-39	11	101442975	101472777	+	6871	Nbr1	GO:0000407;GO:0000407;GO:0000407;GO:0005515;GO:0005654;GO:0005654;GO:0005737;GO:0005739;GO:0005739;GO:0005758;GO:0005764;GO:0005770;GO:0005776;GO:0005776;GO:0005829;GO:0005829;GO:0005829;GO:0008270;GO:0016236;GO:0016236;GO:0016236;GO:0016236;GO:0016236;GO:0016604;GO:0016604;GO:0030500;GO:0031410;GO:0031430;GO:0032872;GO:0043130;GO:0043130;GO:0043130;GO:0043130;GO:0043130;GO:0043231;GO:0043231;GO:…	K17987	-	Z;P;L;B	197HH;1BBKC;0E9MK;13GC4;1DGGA;0B6JS;KOG4351;KOG4582;0V3Y9;0WJAM	NBR1, autophagy cargo receptor [Source:MGI Symbol;Acc:MGI:108498]	17966	P97432;Q05BC8;A1L329
ENSMUSG00000027368	1984.37	55.2077	3913.53	70.8874	6.14746	5.51132e-41	2.54541e-39	2	127178079	127180296	+	2003	Dusp2	GO:0000188;GO:0001706;GO:0004721;GO:0004721;GO:0004721;GO:0004722;GO:0004725;GO:0004725;GO:0005515;GO:0005634;GO:0005634;GO:0005654;GO:0005654;GO:0005737;GO:0006470;GO:0006470;GO:0006470;GO:0008138;GO:0008330;GO:0016311;GO:0016787;GO:0016791;GO:0017017;GO:0017017;GO:0031965;GO:0031965;GO:0035335;GO:0035970;GO:0051019;GO:0051019;GO:0106306;GO:0106307;	K04459	-	V	0UMGK;0DIUX;18SR9;0V8FG;09XHE;1CTK8;1AXH6;KOG1716;12QJ8	dual specificity phosphatase 2 [Source:MGI Symbol;Acc:MGI:101911]	13537	Q05922
ENSMUSG00000033538	2743.7	198.539	5288.86	26.639	4.73547	5.74029e-41	2.64301e-39	9	5308828	5336783	+	3710	Casp4	GO:0004197;GO:0006508;GO:0002376;GO:0004197;GO:0004197;GO:0004197;GO:0005515;GO:0005576;GO:0005737;GO:0005737;GO:0005739;GO:0005739;GO:0005783;GO:0005783;GO:0005789;GO:0005829;GO:0005829;GO:0005886;GO:0006508;GO:0006508;GO:0006508;GO:0006954;GO:0007015;GO:0008233;GO:0008233;GO:0008234;GO:0008234;GO:0012501;GO:0016020;GO:0016540;GO:0016540;GO:0016787;GO:0032731;GO:0032991;GO:0032991;GO:0035234;GO:…	K04394	-	D	1ARQT;0VAES;1CVVC;12S0S;0UFW8;0DM0G;18SGZ;09WHC;KOG3573	caspase 4, apoptosis-related cysteine peptidase [Source:MGI Symbol;Acc:MGI:107700]	12363	P70343
ENSMUSG00000037224	578.5	1079.28	77.7173	0.0720082	-3.79569	6.30811e-41	2.89554e-39	5	34352237	34445793	-	5756	Zfyve28	GO:0005737;GO:0005768;GO:0005829;GO:0005829;GO:0005829;GO:0007175;GO:0007175;GO:0007175;GO:0007175;GO:0016020;GO:0031901;GO:0031901;GO:0031901;GO:0031901;GO:0032266;GO:0032266;GO:0032266;GO:0042059;GO:0042059;GO:0042059;GO:0046872;GO:0046872;	K24780	-	S;Q;E	1CUM2;KOG1819;0UNNQ;1AS23;12P34;0V47X;09V2Q;0DJTW;18XSS	zinc finger, FYVE domain containing 28 [Source:MGI Symbol;Acc:MGI:2684992]	231125	Q6ZPK7
ENSMUSG00000023150	1331.31	2298.67	363.95	0.158331	-2.65899	6.68593e-41	3.05958e-39	1	151220228	151240173	+	5435	Ivns1abp	GO:0005515;GO:0005634;GO:0005634;GO:0005737;GO:0005829;GO:0005829;GO:0005856;GO:0008380;GO:0008380;GO:0009615;GO:0009615;GO:0031397;GO:0031397;GO:0031397;GO:2001243;GO:0005515;GO:0005634;GO:0005634;GO:0005737;GO:0005829;GO:0005856;GO:0008380;GO:0009615;GO:0031397;GO:0031397;GO:2001243;GO:0005515;GO:0005634;GO:0005634;GO:0005737;GO:0005829;GO:0005856;GO:0008380;GO:0009615;GO:0031397;GO:0031397;GO:…	K15046	-	T	0V9KK;1CUX4;0DK3C;18TH6;1B3QI;12RBM;09YNX;0UP04;KOG4441	influenza virus NS1A binding protein [Source:MGI Symbol;Acc:MGI:2152389]	117198	Q920Q8
ENSMUSG00000035004	10999.9	2277.76	19721.9	8.65848	3.11411	8.71106e-41	3.97416e-39	7	120663290	120673795	-	2175	Igsf6	GO:0003674;GO:0005575;GO:0008150;GO:0016020;GO:0016021;	-	-	T	0IUPA;09ZQP;18YGQ;1AYTZ;1CW3M;0DM8I;0UQDG;0VAM6;13K1D	immunoglobulin superfamily, member 6 [Source:MGI Symbol;Acc:MGI:1891393]	80719	P0C6B7
ENSMUSG00000036611	365.139	674.267	56.0104	0.0830685	-3.58955	9.58521e-41	4.35967e-39	9	25392843	25515406	+	2935	Eepd1	GO:0003677;GO:0006281;GO:0010875;GO:0010875;GO:0046658;	-	-	L	1DD6Y;0V1JS;0E67P;14U2D;1BAB5;196X9;0B0UW;0WDCG;0KDV5	endonuclease/exonuclease/phosphatase family domain containing 1 [Source:MGI Symbol;Acc:MGI:1914734]	67484	Q3TGW2
ENSMUSG00000027947	1159.85	2010.48	309.217	0.153803	-2.70085	1.02997e-40	4.67043e-39	3	89771366	89820503	-	8642	Il6ra	GO:0004896;GO:0016020;GO:0016020;GO:0016021;GO:0019221;GO:0004896;GO:0004896;GO:0004897;GO:0004897;GO:0004915;GO:0004915;GO:0004915;GO:0004921;GO:0005138;GO:0005138;GO:0005576;GO:0005576;GO:0005576;GO:0005615;GO:0005886;GO:0005896;GO:0005896;GO:0005896;GO:0008284;GO:0008284;GO:0008284;GO:0009897;GO:0010536;GO:0010536;GO:0010573;GO:0010573;GO:0010573;GO:0016020;GO:0016020;GO:0016021;GO:0016324;GO:…	K05055	-	T	0DGFQ;12SI1;09V6Z;0V66G;0UI8S;0II5K;1922H;1CR5C;1ATTG	interleukin 6 receptor, alpha [Source:MGI Symbol;Acc:MGI:105304]	16194	P22272;Q3URV7
ENSMUSG00000039158	3049.03	940.773	5157.28	5.48196	2.45469	1.21646e-40	5.49941e-39	4	63285362	63321591	-	5765	Akna	GO:0001650;GO:0001650;GO:0001837;GO:0003677;GO:0005515;GO:0005634;GO:0005654;GO:0005654;GO:0005737;GO:0005813;GO:0005813;GO:0005813;GO:0005814;GO:0005829;GO:0005829;GO:0005856;GO:0005874;GO:0007399;GO:0021849;GO:0043231;GO:0043231;GO:0045944;GO:0045944;GO:0050727;GO:0060232;GO:0060234;	K21404	-	K	0IDZE;0DHHH;09W8D;0V76T;0UHN2;18W7Q;1AV6S;13H8V;1CS7S	AT-hook transcription factor [Source:MGI Symbol;Acc:MGI:2140340]	100182	Q80VW7
ENSMUSG00000042349	6814.01	503.592	13124.4	26.0616	4.70385	1.2657e-40	5.70481e-39	1	131182080	131207344	-	9018	Ikbke	GO:0000166;GO:0004672;GO:0004674;GO:0004674;GO:0004704;GO:0004704;GO:0004704;GO:0005515;GO:0005524;GO:0005524;GO:0005634;GO:0005634;GO:0005634;GO:0005737;GO:0005737;GO:0005737;GO:0005737;GO:0006468;GO:0006468;GO:0006468;GO:0006468;GO:0006974;GO:0007252;GO:0008384;GO:0008384;GO:0008630;GO:0008630;GO:0008630;GO:0010884;GO:0016301;GO:0016310;GO:0016605;GO:0016605;GO:0016605;GO:0016740;GO:0018105;GO:…	K07211	EC:2.7.11.10	T	0USJT;09XJY;0V8HW;1CTP1;KOG4250;12QKK;18SIA;0DIXJ;1AUCC	inhibitor of kappaB kinase epsilon [Source:MGI Symbol;Acc:MGI:1929612]	56489	Q9R0T8
ENSMUSG00000066026	2326.29	3950.71	701.874	0.177658	-2.49283	1.48867e-40	6.68963e-39	4	144619397	144654779	+	2927	Dhrs3	GO:0001523;GO:0001523;GO:0003151;GO:0004745;GO:0004745;GO:0004745;GO:0005811;GO:0016020;GO:0016021;GO:0016491;GO:0016616;GO:0030278;GO:0042572;GO:0048385;GO:0048387;GO:0052650;GO:0055114;GO:0055114;GO:0060021;GO:0060349;GO:0060411;GO:0004745;GO:0042572;GO:0055114;GO:0001523;GO:0001523;GO:0003151;GO:0004745;GO:0004745;GO:0004745;GO:0005811;GO:0016020;GO:0016021;GO:0016491;GO:0016616;GO:0030278;GO:…	K11146	EC:1.1.1.300	Q	1CSA6;KOG1201;0UJSN;18Z3C;1B3DA;0DHJV;12U70;09WAI;0V78T	dehydrogenase/reductase (SDR family) member 3 [Source:MGI Symbol;Acc:MGI:1315215]	20148	O88876
ENSMUSG00000059588	4385.11	198.836	8571.39	43.1079	5.42988	1.65772e-40	7.42699e-39	2	84160970	84255755	-	4882	Calcrl	GO:0001525;GO:0001525;GO:0001525;GO:0001605;GO:0001605;GO:0001605;GO:0001635;GO:0001635;GO:0001635;GO:0004888;GO:0004930;GO:0004930;GO:0004948;GO:0005737;GO:0005737;GO:0005764;GO:0005764;GO:0005768;GO:0005768;GO:0005783;GO:0005783;GO:0005886;GO:0005886;GO:0005886;GO:0005886;GO:0006816;GO:0006816;GO:0007165;GO:0007166;GO:0007186;GO:0007186;GO:0007186;GO:0007188;GO:0007189;GO:0007189;GO:0007189;GO:…	K04577	-	T	0UQ2M;0VACF;1CW2Q;KOG4564;1AX1B;0DGT5;18U29;1362D;09TPZ	calcitonin receptor-like [Source:MGI Symbol;Acc:MGI:1926944]	54598	Q9R1W5;A2AR99
ENSMUSG00000047098	2318.39	458.044	4178.74	9.12301	3.18951	1.75736e-40	7.84988e-39	14	55829165	55841150	+	5734	Rnf31	GO:0000209;GO:0000209;GO:0004842;GO:0004842;GO:0004842;GO:0005515;GO:0005515;GO:0005737;GO:0005829;GO:0009898;GO:0009898;GO:0016567;GO:0016740;GO:0023035;GO:0031625;GO:0035631;GO:0042802;GO:0043123;GO:0043123;GO:0043123;GO:0043130;GO:0043130;GO:0046872;GO:0050852;GO:0050852;GO:0051092;GO:0051092;GO:0060546;GO:0071797;GO:0071797;GO:0071797;GO:0097039;GO:0097039;GO:0004842;GO:0016567;GO:0016740;GO:…	K11974	EC:2.3.2.31	O	0V9SQ;09YUV;KOG1812;18Z68;0UQXX;13HGC;0DIDS;1B0P8;1CV3M	ring finger protein 31 [Source:MGI Symbol;Acc:MGI:1934704]	268749	Q924T7
ENSMUSG00000028842	2514.44	765.024	4263.86	5.57349	2.47858	1.8614e-40	8.28986e-39	4	126225497	126323349	-	16571	Ago3	GO:0003676;GO:0000794;GO:0000932;GO:0003676;GO:0003723;GO:0003723;GO:0003725;GO:0003725;GO:0003727;GO:0003727;GO:0004518;GO:0004519;GO:0004521;GO:0004521;GO:0004521;GO:0005654;GO:0005654;GO:0005737;GO:0005737;GO:0005737;GO:0005829;GO:0006402;GO:0006402;GO:0006402;GO:0006417;GO:0010501;GO:0010501;GO:0010628;GO:0016442;GO:0016442;GO:0016442;GO:0016787;GO:0031047;GO:0031047;GO:0031054;GO:0031054;GO:…	K11593	-	J	0DGFB;KOG1041;1AYDM;0V66Q;1CRPD;09V75;12N2H;0UI6Y	argonaute RISC catalytic subunit 3 [Source:MGI Symbol;Acc:MGI:2446634]	214150	Q8CJF9
ENSMUSG00000091144	238.994	26.6429	451.345	16.9405	4.08241	1.91664e-40	8.51057e-39	14	59618282	59632830	-	3459	Phf11c	GO:0003674;GO:0005634;GO:0005654;GO:0008150;GO:0031965;GO:0046872;	-	-	K	1CVYF;0UQ6M;0VAGS;18TG3;0DM3F;13P62;09ZJZ;1B470;KOG1084	PHD finger protein 11C [Source:MGI Symbol;Acc:MGI:3648476]	628705	B4XVP9
ENSMUSG00000094724	215.084	13.7113	416.457	30.3733	4.92473	2.04513e-40	9.05423e-39	17	7238033	7278698	+	4455	Rnaset2b	GO:0003723;GO:0033897;GO:0090502;GO:0002376;GO:0003723;GO:0004518;GO:0004519;GO:0004521;GO:0004540;GO:0005576;GO:0005576;GO:0005615;GO:0005739;GO:0005758;GO:0005764;GO:0005764;GO:0005783;GO:0005788;GO:0005788;GO:0006401;GO:0016020;GO:0016021;GO:0016787;GO:0016829;GO:0033897;GO:0033897;GO:0043202;GO:0045087;GO:0090305;GO:0090501;GO:0090502;GO:0002376;GO:0003723;GO:0004518;GO:0004519;GO:0004521;GO:…	K01166	EC:4.6.1.19	A	1CZ0P;KOG1642;0DQ0B;12SY4;1B3PG;18XUU;0UTAR;0A442;0VEYU	ribonuclease T2B [Source:MGI Symbol;Acc:MGI:3702087]	68195	C0HKG5;C0HKG6;Q5FWA0
ENSMUSG00000020593	227.405	435.047	19.7625	0.0454263	-4.46033	2.13386e-40	9.4192e-39	12	16585670	16696967	-	9930	Lpin1	GO:0006357;GO:0008195;GO:0008195;GO:0009062;GO:0016311;GO:0016787;GO:0019432;GO:0006357;GO:0008195;GO:0008195;GO:0009062;GO:0016311;GO:0016787;GO:0019432;GO:0006357;GO:0008195;GO:0008195;GO:0009062;GO:0016311;GO:0016787;GO:0019432;GO:0006357;GO:0008195;GO:0008195;GO:0009062;GO:0016311;GO:0016787;GO:0019432;GO:0031100;GO:0032869;GO:0006357;GO:0008195;GO:0008195;GO:0009062;GO:0016311;GO:0016787;GO:…	K15728	EC:3.1.3.4	N;K;I	0V77W;0DHIV;18XB2;0UKXQ;1CU51;KOG2116;1AWDZ;09W9K;12PNV	lipin 1 [Source:MGI Symbol;Acc:MGI:1891340]	14245	Q91ZP3;E9QKQ5
ENSMUSG00000045868	124.205	3.64732	244.763	67.1076	6.0684	2.60056e-40	1.14455e-38	7	105755763	105814533	-	9005	Gvin1	GO:0005525;GO:0005634;GO:0005737;GO:0005525;GO:0005634;GO:0005737;	-	-	S	1ATYP;0V6A8;09VAY;191XB;0IG57;0UIDG;12RX4;1CR98;0DGJE	GTPase, very large interferon inducible 1 [Source:MGI Symbol;Acc:MGI:1921808]	74558	L7N451
ENSMUSG00000052512	1273.72	2197.16	350.284	0.159426	-2.64904	2.69287e-40	1.18171e-38	7	48558464	49259838	+	32228	Nav2	GO:0003025;GO:0005614;GO:0005654;GO:0007399;GO:0007399;GO:0007605;GO:0007608;GO:0007626;GO:0008201;GO:0021554;GO:0021563;GO:0021564;GO:0021695;GO:0022008;GO:0031012;GO:0003025;GO:0005614;GO:0005654;GO:0005654;GO:0007399;GO:0007399;GO:0007399;GO:0007605;GO:0007608;GO:0007626;GO:0008201;GO:0021554;GO:0021563;GO:0021564;GO:0022008;GO:0031012;GO:0003025;GO:0005614;GO:0005654;GO:0007399;GO:0007399;GO:…	K19483	EC:3.6.4.12	Z	1916F;0DMIN;12SYF;1CWDU;0UGQ6;0V7DJ;0IGVF;1B0NJ;09ZZ4	neuron navigator 2 [Source:MGI Symbol;Acc:MGI:2183691]	78286	Q8BYE8;Q6ZPE7;Q8BJG0;V9GXT3
ENSMUSG00000030691	1122.53	304.888	1940.16	6.36354	2.66983	2.86628e-40	1.25413e-38	7	100742070	100933612	+	16627	Fchsd2	GO:0005515;GO:0005547;GO:0005547;GO:0005737;GO:0005886;GO:0005886;GO:0005905;GO:0005905;GO:0006897;GO:0007274;GO:0008289;GO:0015031;GO:0016020;GO:0030054;GO:0030833;GO:0030838;GO:0031594;GO:0032420;GO:0042995;GO:0043325;GO:0043325;GO:0044803;GO:0055037;GO:0072583;GO:0072583;GO:0120043;GO:2000601;GO:2000601;GO:0005515;GO:0005547;GO:0005547;GO:0005737;GO:0005886;GO:0005886;GO:0005905;GO:0005905;GO:…	K20125	-	Z	0WG1N;0INNZ;0E7SU;1DESP;13BS4;0B3MQ;1BASM;0V2UI;1972W	FCH and double SH3 domains 2 [Source:MGI Symbol;Acc:MGI:2448475]	207278	Q3USJ8
ENSMUSG00000032727	616.745	141.162	1092.33	7.73811	2.95198	2.96695e-40	1.29438e-38	13	111817513	111855130	+	6094	Mier3	GO:0000122;GO:0001103;GO:0003714;GO:0005634;GO:0005634;GO:0005634;GO:0005654;GO:0005654;GO:0005654;GO:0032991;GO:0032991;GO:0042826;GO:0000122;GO:0001103;GO:0003714;GO:0005634;GO:0005634;GO:0005654;GO:0005654;GO:0032991;GO:0042826;GO:0005634;	-	-	K	KOG4329;12QXQ;09UWJ;0DFQS;1B0RW;0UH5M;191W5;0V5WA;1CQEE	MIER family member 3 [Source:MGI Symbol;Acc:MGI:2442317]	218613	Q3UHF3
ENSMUSG00000026819	962.058	253.694	1670.42	6.5844	2.71905	3.58184e-40	1.5581e-38	2	32304499	32341457	-	7862	Slc25a25	GO:0002021;GO:0005347;GO:0005509;GO:0005739;GO:0005739;GO:0005743;GO:0005743;GO:0014823;GO:0015867;GO:0016020;GO:0016021;GO:0032094;GO:0035264;GO:0043010;GO:0045333;GO:0046034;GO:0046872;GO:0055085;GO:0060612;GO:0070588;GO:0002021;GO:0005347;GO:0005509;GO:0005739;GO:0005739;GO:0005743;GO:0005743;GO:0014823;GO:0015867;GO:0016020;GO:0016021;GO:0032094;GO:0035264;GO:0043010;GO:0045333;GO:0046034;GO:…	K14684	-	C	0UQ1M;1B534;09UKJ;KOG0036;1CQJN;0DFWA;0V5JZ;12PNQ;18XHV	solute carrier family 25 (mitochondrial carrier, phosphate carrier), member 25 [Source:MGI Symbol;Acc:MGI:1915913]	227731	A2ASZ8
ENSMUSG00000020023	2844.98	635.394	5054.57	7.95502	2.99186	4.26421e-40	1.84955e-38	10	94147811	94426818	+	7153	Tmcc3	GO:0005783;GO:0005783;GO:0005783;GO:0005789;GO:0008150;GO:0012505;GO:0016020;GO:0016021;GO:0042802;GO:0042802;GO:0071889;GO:0071889;GO:0005783;GO:0005783;GO:0005789;GO:0008150;GO:0012505;GO:0016020;GO:0016021;GO:0042802;GO:0071889;GO:0005783;GO:0005783;GO:0005789;GO:0008150;GO:0012505;GO:0016020;GO:0016021;GO:0042802;GO:0071889;GO:0005783;GO:0005783;GO:0005789;GO:0008150;GO:0012505;GO:0016020;GO:…	-	-	S;B	1CSA1;0DF1T;0V4QT;09TRG;12P0G;KOG3850;18WZQ;0UNMI;1AXA5	transmembrane and coiled coil domains 3 [Source:MGI Symbol;Acc:MGI:2442900]	319880	Q8R310
ENSMUSG00000074794	435.277	792.27	78.2847	0.0988107	-3.33919	4.32185e-40	1.86914e-38	13	81031503	81044161	+	6266	Arrdc3	GO:0001659;GO:0005737;GO:0005737;GO:0005764;GO:0005768;GO:0005768;GO:0005768;GO:0005768;GO:0005769;GO:0005886;GO:0005886;GO:0005886;GO:0005886;GO:0015031;GO:0016020;GO:0031651;GO:0031699;GO:0031699;GO:0043588;GO:0051443;GO:0051443;GO:0060613;GO:0071878;GO:0090327;GO:0120163;	-	-	S;T;C	KOG3780;13HFT;1952J;1CQ52;09Z9K;0DFFA;0UR8U;0VA6T;1B08W	arrestin domain containing 3 [Source:MGI Symbol;Acc:MGI:2145242]	105171	Q7TPQ9
ENSMUSG00000036067	8005.4	139.07	15871.7	114.128	6.83451	5.78833e-40	2.49615e-38	2	26911375	26918010	-	3211	Slc2a6	GO:0005764;GO:0005765;GO:0005765;GO:0006110;GO:0006110;GO:0008643;GO:0016020;GO:0016020;GO:0016021;GO:0016021;GO:0022857;GO:0055085;GO:1904659;GO:0005764;GO:0005765;GO:0005765;GO:0005765;GO:0006110;GO:0006110;GO:0006110;GO:0008643;GO:0016020;GO:0016020;GO:0016021;GO:0016021;GO:0022857;GO:0055085;GO:1904659;GO:0016020;GO:0016021;	K08144	-	J;G	09VQM;1B3Y1;KOG0254;0DJ26;1CTTS;0V8N1;0UTH3;18XDT;12RBT	solute carrier family 2 (facilitated glucose transporter), member 6 [Source:MGI Symbol;Acc:MGI:2443286]	227659	Q3UDF0
ENSMUSG00000020671	6969.59	2285.41	11653.8	5.09921	2.35027	6.18948e-40	2.66148e-38	12	3297428	3359969	-	3513	Rab10	GO:0000145;GO:0000166;GO:0003924;GO:0003924;GO:0005515;GO:0005515;GO:0005515;GO:0005525;GO:0005525;GO:0005525;GO:0005737;GO:0005768;GO:0005768;GO:0005768;GO:0005783;GO:0005789;GO:0005789;GO:0005794;GO:0005794;GO:0005794;GO:0005802;GO:0005802;GO:0005856;GO:0005886;GO:0005886;GO:0005886;GO:0005929;GO:0005929;GO:0006886;GO:0006893;GO:0006893;GO:0006904;GO:0007409;GO:0007409;GO:0008021;GO:0009306;GO:…	K07903	-	U	0DJYH;09YQS;1CW0X;191AF;0UQ9F;0V9NP;12RDJ;1B0U7;KOG0078	RAB10, member RAS oncogene family [Source:MGI Symbol;Acc:MGI:105066]	19325	P61027;Q4FJL0
ENSMUSG00000028630	1762.4	522.945	3001.86	5.7403	2.52113	7.77906e-40	3.33541e-38	10	118691508	118706114	-	6251	Dyrk2	GO:0000151;GO:0000151;GO:0000166;GO:0000287;GO:0000287;GO:0000287;GO:0004672;GO:0004674;GO:0004674;GO:0004674;GO:0004674;GO:0004712;GO:0004713;GO:0004713;GO:0004713;GO:0005524;GO:0005524;GO:0005524;GO:0005524;GO:0005634;GO:0005634;GO:0005634;GO:0005634;GO:0005654;GO:0005654;GO:0005737;GO:0005737;GO:0005737;GO:0005737;GO:0005829;GO:0005829;GO:0005856;GO:0006468;GO:0006468;GO:0006468;GO:0006468;GO:…	K18669	EC:2.7.12.1	T	0DG5U;09UWE;1B1K2;12NPP;KOG0667;0UHTU;1CQVE;1910M;0V5W3	dual-specificity tyrosine-(Y)-phosphorylation regulated kinase 2 [Source:MGI Symbol;Acc:MGI:1330301]	69181	Q5U4C9
ENSMUSG00000025324	1189.53	85.6225	2293.43	26.7854	4.74338	8.40053e-40	3.59159e-38	7	58305914	58479168	+	5587	Atp10a	GO:0000287;GO:0005524;GO:0015914;GO:0016020;GO:0016021;GO:0016021;GO:0034204;GO:0140326;GO:0000166;GO:0000166;GO:0000287;GO:0000287;GO:0005524;GO:0005524;GO:0005783;GO:0005783;GO:0005783;GO:0005789;GO:0005886;GO:0005886;GO:0005887;GO:0006869;GO:0015914;GO:0016020;GO:0016021;GO:0016021;GO:0034204;GO:0045332;GO:0046872;GO:0140326;GO:0140326;GO:0140326;GO:0140345;GO:0140345;GO:0140351;GO:1903527;GO:…	K01530	EC:7.6.2.1	P	18VYM;0UJDW;0DHAP;12NWG;1ASE6;KOG0206;1CS0T;09U13;0V6ZX	ATPase, class V, type 10A [Source:MGI Symbol;Acc:MGI:1330809]	11982	O54827;Q3V1Y7;Q6A046
ENSMUSG00000019920	7322.55	1776.38	12868.7	7.24438	2.85686	8.73284e-40	3.72302e-38	10	58159288	58260513	+	5137	Lims1	GO:0005886;GO:0005925;GO:0016020;GO:0030054;GO:0005886;GO:0005925;GO:0016020;GO:0030054;GO:0046872;GO:0005886;GO:0005925;GO:0016020;GO:0030054;GO:0032991;GO:0044877;GO:0046872;GO:0005886;GO:0005925;GO:0016020;GO:0030054;GO:0046872;	K23354	-	T	1CQPI;18XV8;12TMT;0DG02;1AU2Z;KOG2272;0V5PR;09UQ4;0UIMX	LIM and senescent cell antigen-like domains 1 [Source:MGI Symbol;Acc:MGI:1195263]	110829	Q99JW4;A0A0R4J005
ENSMUSG00000030232	3268.01	1035.8	5500.22	5.31014	2.40875	1.51163e-39	6.42616e-38	6	140568389	140624198	+	9851	Aebp2	GO:0000122;GO:0000978;GO:0001227;GO:0001227;GO:0003677;GO:0003677;GO:0005634;GO:0005634;GO:0005654;GO:0006325;GO:0006355;GO:0006357;GO:0035098;GO:0035098;GO:0035098;GO:0046872;GO:0000122;GO:0000978;GO:0001227;GO:0001227;GO:0003677;GO:0003677;GO:0005634;GO:0005634;GO:0005654;GO:0006325;GO:0006355;GO:0006357;GO:0035098;GO:0035098;GO:0035098;GO:0046872;GO:0000122;GO:0000978;GO:0001227;GO:0001227;GO:…	K17452	-	K	09XNA;18Y2B;1CTRG;13HMW;0V8JZ;1AX50;KOG1721;0DJ01;0UMNM	AE binding protein 2 [Source:MGI Symbol;Acc:MGI:1338038]	11569	Q9Z248
ENSMUSG00000078606	845.817	42.9903	1648.64	38.3492	5.26112	1.53678e-39	6.51455e-38	7	105544346	105603174	-	9275	Gvin2	GO:0000166;GO:0003674;GO:0005525;GO:0005525;GO:0005575;GO:0005634;GO:0005737;GO:0005829;GO:0008150;GO:0000166;GO:0003674;GO:0005525;GO:0005525;GO:0005575;GO:0005634;GO:0005737;GO:0005829;GO:0008150;GO:0003674;GO:0005575;GO:0008150;	-	-	S	1ATYP;0V6A8;09VAY;191XB;0IG57;0UIDG;12RX4;1CR98;0DGJE	GTPase, very large interferon inducible, family member 2 [Source:MGI Symbol;Acc:MGI:3782245]	100042856	Q80SU7
ENSMUSG00000058835	8741.57	2912.03	14571.1	5.00377	2.32302	1.70811e-39	7.2204e-38	2	22830085	22930253	-	4032	Abi1	GO:0001756;GO:0005515;GO:0005515;GO:0005515;GO:0005634;GO:0005737;GO:0005829;GO:0005856;GO:0005886;GO:0008134;GO:0008154;GO:0014069;GO:0014069;GO:0016235;GO:0017124;GO:0017124;GO:0018108;GO:0030027;GO:0030027;GO:0030027;GO:0030054;GO:0030054;GO:0030175;GO:0030296;GO:0030296;GO:0030426;GO:0031209;GO:0031209;GO:0031252;GO:0032433;GO:0035591;GO:0035855;GO:0042995;GO:0043005;GO:0045202;GO:0048813;GO:…	K23649	-	Z;T	1AV0K;1CTQA;0UMM7;18T6C;09TZX;0V50N;0DFBH;12S1T;KOG2546	abl interactor 1 [Source:MGI Symbol;Acc:MGI:104913]	11308	Q8CBW3;Q3TPY5
ENSMUSG00000005973	818.98	210.306	1427.65	6.78845	2.76308	2.0953e-39	8.83213e-38	2	105216636	105229664	-	3196	Rcn1	GO:0001701;GO:0005509;GO:0005509;GO:0005783;GO:0005783;GO:0005783;GO:0005783;GO:0005788;GO:0043010;GO:0046872;	K23898	-	T;U	1AUBN;0DF13;0V4Q6;KOG4223;18XBN;12PP3;09TQW;0USNY;1CPQY	reticulocalbin 1 [Source:MGI Symbol;Acc:MGI:104559]	19672	Q05186
ENSMUSG00000031101	744.942	1310.02	179.868	0.137302	-2.86458	2.10766e-39	8.85926e-38	X	47235313	47250442	+	2677	Sash3	GO:0002639;GO:0002639;GO:0002726;GO:0002821;GO:0002821;GO:0005634;GO:0005634;GO:0005737;GO:0005737;GO:0030890;GO:0030890;GO:0032729;GO:0032733;GO:0032743;GO:0032753;GO:0032760;GO:0042102;GO:0043372;GO:0046622;GO:0048873;GO:0051251;	K23706	-	T	1971R;1DENT;0V2RS;1BAQF;0INAS;0B3FB;13BFS;0WFUF;0E7NM	SAM and SH3 domain containing 3 [Source:MGI Symbol;Acc:MGI:1921381]	74131	Q8K352
ENSMUSG00000024235	1338.44	385.371	2291.5	5.94622	2.57197	2.71467e-39	1.13788e-37	18	4331327	4353015	-	4504	Map3k8	GO:0000165;GO:0000166;GO:0000186;GO:0000287;GO:0002376;GO:0004672;GO:0004674;GO:0004709;GO:0004709;GO:0004709;GO:0005524;GO:0005524;GO:0005737;GO:0005737;GO:0005829;GO:0005829;GO:0006468;GO:0007049;GO:0007165;GO:0016301;GO:0016310;GO:0016740;GO:0046872;GO:0000165;GO:0000166;GO:0000186;GO:0004674;GO:0004709;GO:0005524;GO:0006468;GO:0016301;GO:0016310;GO:0016740;	K04415	EC:2.7.11.25	T	09V8E;18W6F;1CR6N;KOG0201;12PQ1;1B230;0V67Y;0UIAF;0DGH0	mitogen-activated protein kinase kinase kinase 8 [Source:MGI Symbol;Acc:MGI:1346878]	26410	Q07174;Q3UEB8
ENSMUSG00000020668	870.421	227.859	1512.98	6.63999	2.73118	2.88036e-39	1.20396e-37	12	3415132	3456494	+	7406	Kif3c	GO:0000166;GO:0003777;GO:0003777;GO:0005515;GO:0005524;GO:0005524;GO:0005737;GO:0005829;GO:0005856;GO:0005871;GO:0005874;GO:0005874;GO:0007018;GO:0007018;GO:0008017;GO:0008017;GO:0008017;GO:0008021;GO:0010976;GO:0015630;GO:0016020;GO:0016887;GO:0019894;GO:0030424;GO:0030425;GO:0030426;GO:0035371;GO:0043025;GO:0071598;GO:0072384;GO:0000166;GO:0003777;GO:0003777;GO:0005515;GO:0005524;GO:0005524;GO:…	K20197	-	Z	0UGHI;0V4YP;12NHW;0DF9P;KOG0240;09TZU;18WID;1AYNS;1CPZA	kinesin family member 3C [Source:MGI Symbol;Acc:MGI:107979]	16570	O35066;Q571A6
ENSMUSG00000039997	3897.31	569.133	7225.48	12.6956	3.66626	3.65241e-39	1.52241e-37	1	173747973	173770238	-	6706	Ifi203	GO:0002218;GO:0035458;GO:0002218;GO:0035458;GO:0002218;GO:0035458;GO:0002218;GO:0035458;GO:0002218;GO:0035458;	-	-	K	1CTDT;0UM8D;0DINX;0J5NP;194Q0;1B2J8;1408X;0V89T;09XBF	interferon activated gene 203 [Source:MGI Symbol;Acc:MGI:96428]	15950	O35368;E9PUG6
ENSMUSG00000004043	1514.59	446.801	2582.38	5.7797	2.53099	3.70113e-39	1.53844e-37	11	100750177	100775995	+	7133	Stat5a	GO:0000785;GO:0000978;GO:0000978;GO:0000981;GO:0001228;GO:0001553;GO:0001779;GO:0001938;GO:0003677;GO:0003677;GO:0003677;GO:0003690;GO:0003700;GO:0003700;GO:0005515;GO:0005515;GO:0005515;GO:0005634;GO:0005634;GO:0005634;GO:0005654;GO:0005654;GO:0005737;GO:0005737;GO:0005829;GO:0005829;GO:0006355;GO:0006357;GO:0006357;GO:0006366;GO:0006952;GO:0007165;GO:0007259;GO:0007259;GO:0007565;GO:0007595;GO:…	K11223	-	K	1B289;12PE2;KOG3667;194UJ;0UP21;09VPA;0V6N6;0DGXQ;1CRMY	signal transducer and activator of transcription 5A [Source:MGI Symbol;Acc:MGI:103036]	20850	P42230;Q9JIA0;Q3UZ79
ENSMUSG00000054404	21658.1	2706.9	40609.2	15.0021	3.9071	4.20843e-39	1.74446e-37	11	82842175	82855666	+	6326	Slfn5	GO:0005634;GO:0000166;GO:0005524;GO:0005634;GO:0005634;GO:0030154;GO:0000166;GO:0005524;GO:0005634;GO:0005634;GO:0030154;	-	-	S;P	13MK6;195BZ;0DNJW;1CXGY;1AXTK;0IJEW;0VBV2;0A0YK;0UNAG	schlafen 5 [Source:MGI Symbol;Acc:MGI:1329004]	327978	Q8CBA2
ENSMUSG00000040483	2387.68	170.111	4605.24	27.0719	4.75873	4.57298e-39	1.89033e-37	11	72192455	72204559	+	4689	Xaf1	GO:0006915;GO:0005634;GO:0005634;GO:0005654;GO:0005737;GO:0005739;GO:0005739;GO:0006915;GO:0006915;GO:0031333;GO:0035456;GO:0046872;GO:0005634;GO:0005634;GO:0005654;GO:0005737;GO:0005739;GO:0005739;GO:0006915;GO:0006915;GO:0031333;GO:0035456;GO:0046872;GO:0006915;	-	-	T	13IV2;1CY4E;0IK96;0VBJP;0USIR;0DP6F;0A1ID;1B2PI;193Q8	XIAP associated factor 1 [Source:MGI Symbol;Acc:MGI:3772572]	327959	Q5NBU8
ENSMUSG00000017009	20371.9	722.91	40020.8	55.3608	5.79079	4.76585e-39	1.96463e-37	2	164266167	164285807	-	2547	Sdc4	GO:0001657;GO:0001843;GO:0001968;GO:0001968;GO:0005080;GO:0005080;GO:0005515;GO:0005576;GO:0005796;GO:0005925;GO:0005925;GO:0009986;GO:0009986;GO:0009986;GO:0010762;GO:0016020;GO:0016020;GO:0016021;GO:0016477;GO:0042060;GO:0042130;GO:0042130;GO:0042802;GO:0042802;GO:0042802;GO:0043034;GO:0043034;GO:0045121;GO:0045121;GO:0045860;GO:0045860;GO:0051496;GO:0051496;GO:0051894;GO:0051894;GO:0060122;GO:…	K16338	-	W;T	13RBQ;0VDJG;0UKWC;1CZD7;1ATRY;0IXIG;192PV;0A2PM;0DQBB	syndecan 4 [Source:MGI Symbol;Acc:MGI:1349164]	20971	O35988;Q3U5S6
ENSMUSG00000029371	416.59	4.33093	828.85	191.379	7.58029	5.30017e-39	2.1789e-37	5	90907219	90909483	+	1863	Cxcl5	GO:0001776;GO:0005125;GO:0005576;GO:0005576;GO:0005615;GO:0005615;GO:0005615;GO:0006935;GO:0006935;GO:0006952;GO:0006954;GO:0006954;GO:0006954;GO:0006955;GO:0008009;GO:0008009;GO:0008009;GO:0008009;GO:0010976;GO:0030593;GO:0030593;GO:0030593;GO:0031100;GO:0032496;GO:0032642;GO:0042119;GO:0042119;GO:0045236;GO:0046427;GO:0061844;GO:0061844;GO:0061844;GO:0070098;GO:0070951;GO:0071222;GO:0071222;GO:…	K05506	-	W;T	0DVVG;13XPB;0J4TR;0VMC9;1B6YQ;0UW9G;196H5;1D55R;0AB5B	chemokine (C-X-C motif) ligand 5 [Source:MGI Symbol;Acc:MGI:1096868]	20311	P50228
ENSMUSG00000041058	3338.16	5600.15	1076.17	0.192169	-2.37956	5.4131e-39	2.21922e-37	4	19608303	19708993	-	6453	Wwp1	GO:0000209;GO:0004842;GO:0004842;GO:0004842;GO:0005515;GO:0005634;GO:0005737;GO:0005737;GO:0005829;GO:0005886;GO:0006511;GO:0016020;GO:0016567;GO:0016567;GO:0016567;GO:0016740;GO:0030217;GO:0030324;GO:0043161;GO:0043161;GO:0045732;GO:0045892;GO:0061630;GO:0061630;GO:0061630;GO:0061630;GO:0000209;GO:0004842;GO:0004842;GO:0004842;GO:0005515;GO:0005634;GO:0005737;GO:0005737;GO:0005829;GO:0005886;GO:…	K05633	EC:2.3.2.26	O	1AWJ1;1CPJG;KOG0940;09T7I;0UJJ2;0V46G;18S9B;12NJ4;0DEVW	WW domain containing E3 ubiquitin protein ligase 1 [Source:MGI Symbol;Acc:MGI:1861728]	107568	Q8BZZ3;Q3UV52
ENSMUSG00000057315	596.788	1059.97	133.607	0.126048	-2.98796	7.76958e-39	3.17661e-37	5	102629257	103045803	+	8792	Arhgap24	GO:0005096;GO:0007165;GO:0043547;GO:0001525;GO:0005096;GO:0005096;GO:0005096;GO:0005737;GO:0005856;GO:0005912;GO:0005925;GO:0005925;GO:0005925;GO:0007165;GO:0007275;GO:0030054;GO:0030154;GO:0035021;GO:0035021;GO:0035313;GO:0035313;GO:0042995;GO:0090630;GO:0090630;GO:1900028;GO:1900028;GO:0001525;GO:0005096;GO:0005096;GO:0005096;GO:0005737;GO:0005856;GO:0005912;GO:0005925;GO:0005925;GO:0005925;GO:…	K20642	-	T	0DGF5;18V6A;KOG4270;09V69;0V65V;1AXZS;12P56;0UI84;1CR4U	Rho GTPase activating protein 24 [Source:MGI Symbol;Acc:MGI:1922647]	231532	Q8C4V1;G3X9N1;Q8BHH3
ENSMUSG00000023915	612.048	1097.7	126.397	0.115147	-3.11845	8.07434e-39	3.29222e-37	17	43327446	43400080	+	4109	Tnfrsf21	GO:0001783;GO:0002250;GO:0002250;GO:0002376;GO:0005737;GO:0005737;GO:0005886;GO:0005887;GO:0005887;GO:0005887;GO:0006915;GO:0006915;GO:0006915;GO:0006959;GO:0006959;GO:0007165;GO:0007413;GO:0007413;GO:0016020;GO:0016021;GO:0030424;GO:0030889;GO:0030889;GO:0031226;GO:0031642;GO:0031642;GO:0031642;GO:0032693;GO:0032696;GO:0032714;GO:0042130;GO:0042130;GO:0042552;GO:0048713;GO:0050852;GO:0051402;GO:…	K05157	-	T	09TMQ;0IHQ6;12U3D;1CQK8;0V5KN;1ATNG;18W9X;0DFWV;0UHEA	tumor necrosis factor receptor superfamily, member 21 [Source:MGI Symbol;Acc:MGI:2151075]	94185	Q9EPU5
ENSMUSG00000027951	3825.49	1082.91	6568.06	6.06518	2.60055	1.77392e-38	7.21329e-37	3	89622329	89660753	+	8118	Adar	GO:0001649;GO:0002244;GO:0002376;GO:0002566;GO:0003677;GO:0003692;GO:0003723;GO:0003723;GO:0003725;GO:0003726;GO:0003726;GO:0003726;GO:0004000;GO:0005515;GO:0005515;GO:0005634;GO:0005634;GO:0005654;GO:0005730;GO:0005730;GO:0005730;GO:0005737;GO:0005737;GO:0005737;GO:0006382;GO:0006382;GO:0006382;GO:0006396;GO:0006396;GO:0006397;GO:0006606;GO:0006611;GO:0008251;GO:0009615;GO:0009615;GO:0016553;GO:…	K12968	EC:3.5.4.37	A;K	0UMSB;KOG2777;18TUX;0V71Q;1CPDQ;0DJ39;09XR6;1AUGA;12PNZ	adenosine deaminase, RNA-specific [Source:MGI Symbol;Acc:MGI:1889575]	56417	Q99MU3;Q3UH31
ENSMUSG00000037826	485.745	104.289	867.202	8.31534	3.05578	1.89298e-38	7.67657e-37	6	57483487	57512453	-	6022	Ppm1k	GO:0004721;GO:0004722;GO:0005739;GO:0005739;GO:0005759;GO:0006470;GO:0016311;GO:0016787;GO:0016791;GO:0043169;GO:0046872;GO:0106306;GO:0106307;GO:0016311;GO:0016791;	K17505	EC:3.1.3.16	T	12W2A;0V7PX;0DI16;1CSRU;1ASX6;0UKDI;KOG0698;09WRI;18UDH	protein phosphatase 1K (PP2C domain containing) [Source:MGI Symbol;Acc:MGI:2442111]	243382	Q8BXN7;B9EHW0
ENSMUSG00000032508	2953.96	712.568	5195.36	7.29103	2.86612	2.32154e-38	9.38907e-37	9	119165000	119170477	-	2576	Myd88	GO:0002238;GO:0002376;GO:0002755;GO:0002755;GO:0005102;GO:0005102;GO:0005121;GO:0005121;GO:0005149;GO:0005149;GO:0005149;GO:0005515;GO:0005515;GO:0005515;GO:0005515;GO:0005634;GO:0005634;GO:0005634;GO:0005737;GO:0005737;GO:0005737;GO:0005829;GO:0005886;GO:0005886;GO:0006909;GO:0006909;GO:0006909;GO:0006915;GO:0006915;GO:0006954;GO:0006954;GO:0006955;GO:0007165;GO:0007166;GO:0007178;GO:0007254;GO:…	K04729	-	T;K	12SM9;0A237;1CWEU;0UQSF;191S8;0VCYQ;0IIN8;0DFRX;1B0YG	myeloid differentiation primary response gene 88 [Source:MGI Symbol;Acc:MGI:108005]	17874	P22366;Q3U7M4
ENSMUSG00000047810	2793.45	899.13	4687.76	5.21367	2.3823	2.48729e-38	1.00323e-36	19	6821991	6835579	-	5032	Ccdc88b	GO:0001819;GO:0005737;GO:0005737;GO:0005783;GO:0005794;GO:0005813;GO:0005856;GO:0008017;GO:0016020;GO:0030705;GO:0030705;GO:0031122;GO:0042102;GO:0042832;GO:0050870;GO:0051959;	-	-	Z;I;E	0A59N;1D13T;140CN;0DSH2;18VWT;0VEAG;1ASG7;0UG96;KOG4643	coiled-coil domain containing 88B [Source:MGI Symbol;Acc:MGI:1925567]	78317	Q4QRL3
ENSMUSG00000066861	2346.32	165.715	4526.93	27.3175	4.77176	3.45218e-38	1.38867e-36	5	121014205	121025676	-	2340	Oas1g	GO:0001730;GO:0001730;GO:0001730;GO:0001730;GO:0002376;GO:0003723;GO:0003725;GO:0003725;GO:0003725;GO:0005634;GO:0005654;GO:0005654;GO:0005737;GO:0005737;GO:0005829;GO:0005829;GO:0016020;GO:0016779;GO:0045071;GO:0045087;GO:0051607;GO:0051607;GO:0051607;GO:0060700;GO:0001730;GO:0001730;GO:0001730;GO:0001730;GO:0002376;GO:0003723;GO:0003725;GO:0003725;GO:0003725;GO:0003725;GO:0005634;GO:0005654;GO:…	K14216	EC:2.7.7.84	H;J;O	0DF4M;0V4TK;1CP6T;KOG0001;09TUC;0UM27;1AT0Y;12QYV;18U5V	2'-5' oligoadenylate synthetase 1G [Source:MGI Symbol;Acc:MGI:97429]	23960	Q8K469
ENSMUSG00000032691	23192.3	550.213	45834.3	83.3029	6.3803	4.00713e-38	1.60758e-36	11	59432394	59457782	+	4057	Nlrp3	GO:0000139;GO:0000166;GO:0002367;GO:0002376;GO:0002674;GO:0002830;GO:0005515;GO:0005515;GO:0005524;GO:0005576;GO:0005634;GO:0005737;GO:0005737;GO:0005783;GO:0005829;GO:0005829;GO:0006919;GO:0006954;GO:0006954;GO:0006954;GO:0008134;GO:0032088;GO:0032088;GO:0032691;GO:0032731;GO:0032731;GO:0032731;GO:0032731;GO:0032736;GO:0032753;GO:0032754;GO:0042802;GO:0043280;GO:0043280;GO:0043280;GO:0043565;GO:…	K12800	-	S;T	1AXM4;09Y5T;0IE5X;0V93A;0DJJ2;0UNAE;1CUBN;1914T;13QUA	NLR family, pyrin domain containing 3 [Source:MGI Symbol;Acc:MGI:2653833]	216799	Q8R4B8
ENSMUSG00000021133	9092.04	2289.36	15894.7	6.94285	2.79553	1.01594e-37	4.06486e-36	12	80837284	80927609	+	7615	Susd6	GO:0006974;GO:0008219;GO:0016020;GO:0016021;GO:0003674;GO:0005575;GO:0006974;GO:0006974;GO:0008219;GO:0008219;GO:0016020;GO:0016021;	K23824	-	S	0IGYD;1B51T;09Z6X;0VA47;18XNM;1CVHC;136BN;0DKNV;0UPPC	sushi domain containing 6 [Source:MGI Symbol;Acc:MGI:2444661]	217684	Q8BGE4
ENSMUSG00000071757	889.729	87.9725	1691.49	19.2274	4.26509	1.22526e-37	4.8893e-36	15	57558061	57703228	+	4434	Zhx2	GO:0000122;GO:0000122;GO:0000981;GO:0003677;GO:0003677;GO:0005515;GO:0005515;GO:0005634;GO:0005634;GO:0005634;GO:0005634;GO:0005654;GO:0005654;GO:0005829;GO:0005829;GO:0006357;GO:0006357;GO:0006402;GO:0007399;GO:0030154;GO:0035019;GO:0042802;GO:0042802;GO:0042803;GO:0042803;GO:0042803;GO:0045665;GO:0045892;GO:0045892;GO:0045892;GO:0046872;GO:0046982;GO:0046982;GO:0046982;GO:0060040;	-	-	K	13KXP;0UFNS;0IHET;18XRZ;0DJ6M;1B3Q6;09X5D;1CTYI;0V8S2	zinc fingers and homeoboxes 2 [Source:MGI Symbol;Acc:MGI:2683087]	387609	Q8C0C0
ENSMUSG00000023087	1283.67	379.103	2188.24	5.77216	2.52911	1.23526e-37	4.91607e-36	3	51131868	51159065	+	10658	Noct	GO:0000175;GO:0000290;GO:0000932;GO:0003723;GO:0003729;GO:0004535;GO:0004535;GO:0005515;GO:0005515;GO:0005634;GO:0005737;GO:0005739;GO:0005739;GO:0005739;GO:0006739;GO:0006739;GO:0006739;GO:0007623;GO:0007623;GO:0009991;GO:0010629;GO:0016311;GO:0016787;GO:0019178;GO:0019178;GO:0019178;GO:0032496;GO:0032922;GO:0032922;GO:0033962;GO:0042752;GO:0045600;GO:0045668;GO:0045995;GO:0046872;GO:0048255;GO:…	K18764	EC:3.1.3.108	K	1CQ04;0DFAD;0V4ZD;12NGN;0UNED;KOG0620;09U0N;18YWP;1AXY3	nocturnin [Source:MGI Symbol;Acc:MGI:109382]	12457	O35710;B2RTJ8
ENSMUSG00000096727	890.486	245.875	1535.1	6.2434	2.64233	1.72577e-37	6.84998e-36	17	34400961	34406738	-	3660	Psmb9	GO:0000502;GO:0002376;GO:0002376;GO:0004175;GO:0004298;GO:0004298;GO:0005634;GO:0005737;GO:0005829;GO:0005839;GO:0006508;GO:0008233;GO:0016787;GO:0051603;GO:2000116;GO:0002376;GO:0004175;GO:0005839;GO:0006508;GO:0000502;GO:0002376;GO:0004175;GO:0004298;GO:0005634;GO:0005737;GO:0005839;GO:0051603;GO:0000502;GO:0002376;GO:0004175;GO:0004298;GO:0005634;GO:0005737;GO:0005839;GO:0051603;	K02741	EC:3.4.25.1	O	KOG0174;1CRNE;0DGY5;12QEH;0UQ7J;1ARJE;18U8E;0VA28;09Z52	proteasome (prosome, macropain) subunit, beta type 9 (large multifunctional peptidase 2) [Source:MGI Symbol;Acc:MGI:1346526]	16912	P28076;A0A0R4J256
ENSMUSG00000027514	2934.16	56.5749	5811.74	102.726	6.68266	1.7431e-37	6.90045e-36	2	173048405	173060716	-	3529	Zbp1	GO:0003677;GO:0005515;GO:0051607;GO:0060340;GO:0002218;GO:0002376;GO:0003677;GO:0003677;GO:0003677;GO:0003677;GO:0003692;GO:0003723;GO:0003725;GO:0005515;GO:0005634;GO:0005634;GO:0005634;GO:0005737;GO:0005737;GO:0005829;GO:0005829;GO:0006915;GO:0012501;GO:0016032;GO:0042802;GO:0043065;GO:0045087;GO:0050727;GO:0050729;GO:0051607;GO:0051607;GO:0060340;GO:0060340;GO:0060340;GO:0060545;GO:0060545;GO:…	K12965	-	K	192GJ;0J2S4;13Y6T;0A251;1B3EH;1CYSE;0VBK5;0UT4C;0DPT8	Z-DNA binding protein 1 [Source:MGI Symbol;Acc:MGI:1927449]	58203	Q9QY24
ENSMUSG00000050777	593.937	1048.94	138.933	0.132451	-2.91647	2.09609e-37	8.27595e-36	1	119995107	120001804	-	1311	Tmem37	GO:0005244;GO:0005244;GO:0005262;GO:0005262;GO:0006811;GO:0006816;GO:0016020;GO:0016021;GO:0016021;GO:0034765;GO:0070588;	-	-	P	1D15R;0IE8N;09UTS;0UH5U;0DRWY;0VF8R;1B403;13P6E;18XW6	transmembrane protein 37 [Source:MGI Symbol;Acc:MGI:2157899]	170706	Q9JJV3
ENSMUSG00000026088	566.061	135.23	996.892	7.3718	2.88202	2.11488e-37	8.32819e-36	1	37913882	37929492	-	2770	Mitd1	GO:0000281;GO:0005768;GO:0007049;GO:0016020;GO:0019898;GO:0019904;GO:0030496;GO:0030496;GO:0031902;GO:0032091;GO:0035091;GO:0042802;GO:0043231;GO:0051301;GO:0061952;GO:0000281;GO:0000281;GO:0005768;GO:0007049;GO:0016020;GO:0019898;GO:0019898;GO:0019904;GO:0019904;GO:0030496;GO:0030496;GO:0030496;GO:0031902;GO:0032091;GO:0032091;GO:0035091;GO:0035091;GO:0042802;GO:0042802;GO:0043231;GO:0043231;GO:…	-	-	S;O;W	1CSPD;1923Y;0V7MP;09WP3;0DHYS;12SG6;1AVSV;0UKAN;KOG4509	MIT, microtubule interacting and transport, domain containing 1 [Source:MGI Symbol;Acc:MGI:1916278]	69028	Q8VDV8
ENSMUSG00000034168	580.294	1026.29	134.295	0.130855	-2.93396	2.41679e-37	9.49208e-36	12	86927475	86931572	-	4098	Irf2bpl	GO:0000122;GO:0000122;GO:0003714;GO:0005634;GO:0005634;GO:0005634;GO:0005634;GO:0005654;GO:0005654;GO:0006357;GO:0007399;GO:0007399;GO:0016567;GO:0016740;GO:0045944;GO:0045944;GO:0046543;GO:0046872;GO:0061630;GO:0061630;GO:0061630;	K22383	-	K	1CY0R;0VCAV;13KJD;0UQHX;1AY4M;0A0FC;0DP2S;18U58;KOG3579	interferon regulatory factor 2 binding protein-like [Source:MGI Symbol;Acc:MGI:2442463]	238330	Q8K3X4
ENSMUSG00000052102	1980.88	3484.22	477.534	0.137056	-2.86716	2.87944e-37	1.12796e-35	18	38460588	38472056	-	4311	Gnpda1	GO:0004342;GO:0004342;GO:0005975;GO:0006044;GO:0004342;GO:0004342;GO:0005975;GO:0006044;GO:0004342;GO:0004342;GO:0004342;GO:0004342;GO:0005737;GO:0005737;GO:0005975;GO:0005975;GO:0006002;GO:0006041;GO:0006043;GO:0006043;GO:0006043;GO:0006044;GO:0006046;GO:0006048;GO:0006091;GO:0006091;GO:0007340;GO:0016787;GO:0019262;GO:0042802;GO:0046370;GO:0004342;GO:0006044;GO:0004342;GO:0004342;GO:0005975;GO:…	K02564	EC:3.5.99.6	G	1CVXB;0UISP;0DM2B;KOG3148;18XDD;0VAG3;1AWGP;09ZJ4;12P4Z	glucosamine-6-phosphate deaminase 1 [Source:MGI Symbol;Acc:MGI:1347054]	26384	O88958;Q3TKA0
ENSMUSG00000021196	4811.36	1646	7976.71	4.84611	2.27683	4.64039e-37	1.81302e-35	13	6629804	6698813	-	13401	Pfkp	GO:0000166;GO:0003824;GO:0003872;GO:0003872;GO:0003872;GO:0003872;GO:0005524;GO:0005524;GO:0005524;GO:0005524;GO:0005737;GO:0005737;GO:0005737;GO:0005737;GO:0005829;GO:0005945;GO:0005945;GO:0006002;GO:0006002;GO:0006002;GO:0006096;GO:0006096;GO:0006096;GO:0008152;GO:0016020;GO:0016208;GO:0016301;GO:0016310;GO:0016740;GO:0030388;GO:0030388;GO:0042802;GO:0042802;GO:0044877;GO:0044877;GO:0046872;GO:…	K00850	EC:2.7.1.11	G	09U07;0DFA0;KOG2440;1ASPB;0V4Z1;0UH05;12PSE;18WW7;1CPZP	phosphofructokinase, platelet [Source:MGI Symbol;Acc:MGI:1891833]	56421	Q9WUA3;Q8C605
ENSMUSG00000036833	2685.41	4486.59	884.231	0.197083	-2.34312	4.66691e-37	1.81863e-35	2	24866045	24944069	+	7496	Pnpla7	GO:0004622;GO:0004622;GO:0004622;GO:0004622;GO:0005783;GO:0005783;GO:0005783;GO:0005789;GO:0005789;GO:0005811;GO:0006629;GO:0006629;GO:0016020;GO:0016021;GO:0016042;GO:0016787;GO:0034638;GO:0052689;GO:0102545;GO:0016020;GO:0016021;GO:0016020;GO:0016021;	K14676	EC:3.1.1.5	O;I	0UPTC;KOG2968;12S4D;190SS;09VN1;1CU97;1AXUC;0DJGR;0V917	patatin-like phospholipase domain containing 7 [Source:MGI Symbol;Acc:MGI:2385325]	241274	A2AJ88
ENSMUSG00000020773	459.172	822.835	95.508	0.116072	-3.10691	4.88188e-37	1.89747e-35	11	115996578	116018036	-	2735	Trim47	GO:0004842;GO:0004842;GO:0005634;GO:0005737;GO:0005829;GO:0008270;GO:0016567;GO:0016567;GO:0016740;GO:0046872;GO:0004842;GO:0004842;GO:0004842;GO:0005634;GO:0005737;GO:0005829;GO:0005829;GO:0008270;GO:0016567;GO:0016567;GO:0016567;GO:0016740;GO:0046872;	K12023	-	O	0A1J2;0VCET;18SZS;0UJVK;0DP4V;13HCI;1CY2X;0IJ9G;1B01C	tripartite motif-containing 47 [Source:MGI Symbol;Acc:MGI:1917374]	217333	Q8C0E3;Q497Z1
ENSMUSG00000045551	7244.3	60.6089	14428	238.051	7.89512	6.11019e-37	2.36873e-35	17	18096733	18104202	-	1324	Fpr1	GO:0001664;GO:0001664;GO:0002430;GO:0004875;GO:0004930;GO:0004930;GO:0004930;GO:0004982;GO:0004982;GO:0004982;GO:0004982;GO:0005124;GO:0005124;GO:0005737;GO:0005737;GO:0005886;GO:0005886;GO:0005886;GO:0005886;GO:0006935;GO:0006935;GO:0006954;GO:0007165;GO:0007186;GO:0007186;GO:0007186;GO:0007200;GO:0007200;GO:0007200;GO:0007204;GO:0016020;GO:0016021;GO:0016021;GO:0050786;GO:0050786;	K04172	-	T	09YRX;194JK;1CTRF;0DNT1;0II0H;1AX0S;13FV7;0UP03;0V7XT	formyl peptide receptor 1 [Source:MGI Symbol;Acc:MGI:107443]	14293	P33766
ENSMUSG00000006403	670.334	4.07102	1336.6	328.32	8.35896	6.2752e-37	2.42641e-35	1	171077990	171088206	+	4810	Adamts4	GO:0002020;GO:0004222;GO:0004222;GO:0004222;GO:0005515;GO:0005576;GO:0005615;GO:0006508;GO:0006508;GO:0006508;GO:0008233;GO:0008233;GO:0008237;GO:0008237;GO:0008237;GO:0016607;GO:0016787;GO:0030198;GO:0031012;GO:0042742;GO:0046872;GO:0062023;GO:0002020;GO:0004222;GO:0005576;GO:0005615;GO:0006508;GO:0006508;GO:0008233;GO:0008233;GO:0008237;GO:0008237;GO:0016607;GO:0016787;GO:0046872;GO:0004222;GO:…	K07764	EC:3.4.24.82	-	-	a disintegrin-like and metallopeptidase (reprolysin type) with thrombospondin type 1 motif, 4 [Source:MGI Symbol;Acc:MGI:1339949]	240913	Q8BNJ2
ENSMUSG00000056153	1727.11	3012.63	441.595	0.146581	-2.77023	7.625e-37	2.94073e-35	18	88683348	88945605	-	11349	Socs6	GO:0001772;GO:0001772;GO:0005515;GO:0005515;GO:0005515;GO:0005829;GO:0005942;GO:0005942;GO:0009968;GO:0010498;GO:0010498;GO:0016567;GO:0016567;GO:0035556;GO:0040008;GO:0040008;GO:0040008;GO:0043551;GO:0046854;GO:0046854;GO:0046935;GO:0046935;GO:0050868;GO:0001772;GO:0005515;GO:0005515;GO:0005515;GO:0005829;GO:0005942;GO:0005942;GO:0009968;GO:0010498;GO:0016567;GO:0016567;GO:0035556;GO:0040008;GO:…	K04699	-	T	13HHP;0DNEK;1CXBX;0VBPX;KOG4566;1920D;0UIE0;1B1ZT;0A0TB	suppressor of cytokine signaling 6 [Source:MGI Symbol;Acc:MGI:1924885]	54607	Q9JLY0
ENSMUSG00000039031	588.295	1037.04	139.555	0.134571	-2.89356	9.42957e-37	3.62736e-35	10	26629417	26794644	+	6602	Arhgap18	GO:0001726;GO:0001726;GO:0005096;GO:0005096;GO:0005096;GO:0005096;GO:0005737;GO:0005737;GO:0005737;GO:0005737;GO:0005829;GO:0005829;GO:0005881;GO:0005881;GO:0005886;GO:0005886;GO:0007165;GO:0007264;GO:0007264;GO:0008360;GO:0008360;GO:0016607;GO:0016607;GO:0030833;GO:0030833;GO:0030833;GO:0032956;GO:0032956;GO:0043547;GO:0051056;GO:0051056;GO:0051056;GO:2000145;GO:2000145;	K20639	-	T	KOG2200;0DG4N;0UJCT;0V5UR;12NYV;1CQU7;09UV5;18Y96;1B13Z	Rho GTPase activating protein 18 [Source:MGI Symbol;Acc:MGI:1921160]	73910	Q8K0Q5
ENSMUSG00000012519	1263.25	157.32	2369.17	15.0596	3.91261	9.58947e-37	3.6794e-35	8	112038429	112064809	-	2303	Mlkl	GO:0000166;GO:0004706;GO:0005515;GO:0005515;GO:0005515;GO:0005524;GO:0005524;GO:0005524;GO:0005524;GO:0005634;GO:0005737;GO:0005737;GO:0005737;GO:0005829;GO:0005886;GO:0005886;GO:0005886;GO:0006468;GO:0007166;GO:0007256;GO:0007257;GO:0012501;GO:0016020;GO:0019901;GO:0030054;GO:0042802;GO:0044877;GO:0044877;GO:0051607;GO:0070207;GO:0070207;GO:0070207;GO:0070266;GO:0070266;GO:0070266;GO:0097527;GO:…	K08849	EC:2.7.11.1	T	09UGW;12NRJ;1CQG8;0UH87;KOG0192;0DFSR;0V5G7;1B3AV;190B6	mixed lineage kinase domain-like [Source:MGI Symbol;Acc:MGI:1921818]	74568	Q9D2Y4
ENSMUSG00000039852	1573.87	2657.44	490.297	0.1845	-2.43831	1.33784e-36	5.12006e-35	4	150366103	150706423	+	8528	Rere	GO:0000118;GO:0001085;GO:0003682;GO:0003713;GO:0003714;GO:0003714;GO:0005515;GO:0005634;GO:0005634;GO:0005634;GO:0005634;GO:0006338;GO:0006355;GO:0007275;GO:0008270;GO:0016605;GO:0021549;GO:0021691;GO:0021930;GO:0021942;GO:0043565;GO:0045892;GO:0045893;GO:0046872;GO:0048755;GO:0048813;GO:0003682;GO:0005634;GO:0006355;GO:0008270;GO:0043565;GO:0005634;GO:0005634;	K05628	-	K	KOG2133;136GN;18SFS;0V4FW;09TGX;0UFV1;1CPHF;1ARPX;0DETP	arginine glutamic acid dipeptide (RE) repeats [Source:MGI Symbol;Acc:MGI:2683486]	68703	Q80TZ9
ENSMUSG00000099974	1720.28	54.0349	3386.52	62.6729	5.96977	1.43905e-36	5.49337e-35	9	88605338	88613967	-	863	Bcl2a1d	GO:0005741;GO:0006915;GO:0008630;GO:0030217;GO:0042803;GO:0042981;GO:0043027;GO:0043066;GO:0043154;GO:0044877;GO:0046982;GO:0050852;GO:0051400;GO:0097192;	K02162	-	T	192MA;1CPFD;0A0GW;0DERK;0UFS5;KOG4728;1ARKX;0V569;13S3B	B cell leukemia/lymphoma 2 related protein A1d [Source:MGI Symbol;Acc:MGI:1278325]	12047	O55179
ENSMUSG00000040253	5225.7	37.8797	10413.5	274.91	8.10282	1.6442e-36	6.26051e-35	3	142236103	142255910	+	5614	Gbp7	GO:0003924;GO:0003924;GO:0005525;GO:0005525;GO:0005794;GO:0020005;GO:0031410;GO:0031410;GO:0042832;GO:0042832;GO:0044406;GO:0050830;GO:0050830;GO:0071346;GO:0071346;GO:0003924;GO:0003924;GO:0005525;GO:0005525;GO:0005794;GO:0020005;GO:0031410;GO:0031410;GO:0042832;GO:0042832;GO:0044406;GO:0050830;GO:0050830;GO:0071346;GO:0071346;	K20899	-	S;O;T;D;C;K	191WI;0V9BC;134KU;09XSJ;1AYRV;KOG2037;1CUKV;0UNNF;0DJTQ	guanylate binding protein 7 [Source:MGI Symbol;Acc:MGI:2444421]	229900	Q91Z40
ENSMUSG00000043953	11462.5	547.349	22377.6	40.8835	5.35345	1.66641e-36	6.32898e-35	9	110883554	110886587	-	2598	Ccrl2	GO:0004930;GO:0004930;GO:0004950;GO:0005737;GO:0005886;GO:0005887;GO:0005887;GO:0006935;GO:0006954;GO:0006954;GO:0006955;GO:0007165;GO:0007186;GO:0007186;GO:0007204;GO:0009897;GO:0016020;GO:0016021;GO:0016021;GO:0016493;GO:0016493;GO:0019722;GO:0019957;GO:0042379;GO:0042379;GO:0048020;GO:0060326;GO:0070098;GO:0004930;GO:0004930;GO:0004950;GO:0005737;GO:0005886;GO:0005887;GO:0005887;GO:0006935;GO:…	K08373	-	T	0A3FQ;13NJS;194AK;1D07T;0VDFJ;1B049;0IKE4;0DR2W;0UU54	chemokine (C-C motif) receptor-like 2 [Source:MGI Symbol;Acc:MGI:1920904]	54199	O35457
ENSMUSG00000026207	1214.59	2066.23	362.952	0.175659	-2.50915	2.11281e-36	8.00406e-35	1	75351941	75408964	+	12741	Speg	GO:0000166;GO:0004672;GO:0004674;GO:0005524;GO:0005524;GO:0005634;GO:0006468;GO:0042692;GO:0004674;GO:0005524;GO:0006468;GO:0000166;GO:0001701;GO:0004672;GO:0004672;GO:0004674;GO:0004674;GO:0005524;GO:0005524;GO:0005634;GO:0005634;GO:0006468;GO:0016301;GO:0016310;GO:0016740;GO:0030154;GO:0042692;GO:0055013;GO:0060541;GO:0072359;GO:0106310;GO:0106311;GO:0004674;GO:0005524;GO:0006468;GO:0000166;GO:…	K08809	EC:2.7.11.1	Z;T	0URT2;KOG0613;18YMI;12NP0;09UCG;0DPBY;KOG0032;1CUZK;1B4VA;0V474	SPEG complex locus [Source:MGI Symbol;Acc:MGI:109282]	11790	Q62407
ENSMUSG00000031833	814.921	1409.11	220.737	0.15665	-2.67438	2.28713e-36	8.64258e-35	8	71230761	71257698	-	5955	Mast3	GO:0000166;GO:0000287;GO:0004672;GO:0004674;GO:0004674;GO:0004674;GO:0005524;GO:0005524;GO:0006468;GO:0007010;GO:0016301;GO:0016310;GO:0016740;GO:0018105;GO:0035556;GO:0106310;GO:0106311;GO:0000166;GO:0000287;GO:0004672;GO:0004674;GO:0004674;GO:0005524;GO:0005524;GO:0006468;GO:0016301;GO:0016310;GO:0016740;GO:0106310;GO:0106311;GO:0000287;GO:0004674;GO:0005524;GO:0006468;GO:0000287;GO:0004674;GO:…	K08789	EC:2.7.11.1	T	0USHF;09XE5;1B2K6;0DIRR;KOG0606;18W8M;0V8C7;1CXWQ;12Q17	microtubule associated serine/threonine kinase 3 [Source:MGI Symbol;Acc:MGI:2683541]	546071	Q3U214;A0A1D5RM97
ENSMUSG00000016552	207.904	395.374	20.4345	0.051684	-4.27414	2.33617e-36	8.80565e-35	15	77824722	77840922	-	5939	Foxred2	GO:0005783;GO:0005788;GO:0005788;GO:0005788;GO:0005788;GO:0016491;GO:0030433;GO:0030433;GO:0030433;GO:0030433;GO:0050660;GO:0050660;GO:0050660;GO:0055114;GO:0005783;GO:0005788;GO:0005788;GO:0005788;GO:0016491;GO:0030433;GO:0030433;GO:0030433;GO:0050660;GO:0050660;GO:0055114;	-	-	Q	0UKW3;1AVEA;18WE4;09X1X;12NQH;KOG1399;1CT4E;0DICJ;0V5ED	FAD-dependent oxidoreductase domain containing 2 [Source:MGI Symbol;Acc:MGI:106315]	239554	Q3USW5
ENSMUSG00000066363	86.3732	0.358181	172.388	481.289	8.91076	2.59936e-36	9.77305e-35	12	104180803	104187388	+	2290	Serpina3f	GO:0004867;GO:0004867;GO:0005615;GO:0005615;GO:0009617;GO:0010466;GO:0010951;GO:0030414;GO:0034097;GO:0043434;GO:0004867;GO:0004867;GO:0005615;GO:0005615;GO:0009617;GO:0010466;GO:0010951;GO:0030414;GO:0034097;GO:0043434;GO:0004867;GO:0004867;GO:0005615;GO:0005615;GO:0009617;GO:0010466;GO:0010951;GO:0030414;GO:0034097;GO:0043434;	K04525	-	V	0UM4R;1B1G0;09U5H;KOG2392;12R4F;0V54I;1CQ4S;0DFF0;18T05	serine (or cysteine) peptidase inhibitor, clade A, member 3F [Source:MGI Symbol;Acc:MGI:2182838]	238393	Q80X76;Q3UTZ5
ENSMUSG00000035692	6786	43.5472	13528.5	310.662	8.2792	3.08021e-36	1.15519e-34	4	156283912	156285253	-	703	Isg15	GO:0005178;GO:0005178;GO:0005178;GO:0005515;GO:0005515;GO:0005576;GO:0005576;GO:0005576;GO:0005634;GO:0005737;GO:0005737;GO:0007229;GO:0007229;GO:0007229;GO:0009617;GO:0019941;GO:0019941;GO:0022627;GO:0030501;GO:0031386;GO:0031386;GO:0031397;GO:0031397;GO:0031397;GO:0031625;GO:0032020;GO:0032020;GO:0032020;GO:0032020;GO:0032609;GO:0032613;GO:0032649;GO:0032649;GO:0032649;GO:0034340;GO:0034340;GO:…	K12159	-	O	0DTRB;193EP;0UUZS;KOG0001;13VQF;1B5MQ;0VI08;1D338;0A6PP	ISG15 ubiquitin-like modifier [Source:MGI Symbol;Acc:MGI:1855694]	100038882	Q64339;Q4FJR9
ENSMUSG00000049225	794.055	1373.72	214.392	0.156067	-2.67976	4.38435e-36	1.64018e-34	4	11958184	11966452	-	4507	Pdp1	GO:0000287;GO:0004721;GO:0004722;GO:0004722;GO:0004724;GO:0004724;GO:0004741;GO:0004741;GO:0004741;GO:0005509;GO:0005509;GO:0005739;GO:0005739;GO:0005739;GO:0005759;GO:0006470;GO:0006470;GO:0006470;GO:0016787;GO:0016791;GO:0035970;GO:0043169;GO:0044877;GO:0046872;GO:1904184;GO:0004721;GO:0004722;GO:0004722;GO:0006470;GO:0016787;GO:0016791;GO:0035970;GO:0043169;GO:0046872;GO:0004721;GO:0004722;GO:…	K01102	EC:3.1.3.43	T	13A7V;0UU66;1CWAY;KOG0700;09YR5;18S7D;1AW6T;0VATK;0DMFM	pyruvate dehyrogenase phosphatase catalytic subunit 1 [Source:MGI Symbol;Acc:MGI:2685870]	381511	Q3UV70;A8Y5Q1
ENSMUSG00000032754	1955.54	3275.85	635.228	0.193912	-2.36653	4.57406e-36	1.70689e-34	5	120649233	120672089	+	3463	Slc8b1	GO:0005432;GO:0005432;GO:0005432;GO:0005739;GO:0005739;GO:0005739;GO:0005739;GO:0005743;GO:0005743;GO:0005743;GO:0005886;GO:0005886;GO:0006811;GO:0006812;GO:0006814;GO:0006816;GO:0006851;GO:0006851;GO:0006874;GO:0008324;GO:0015297;GO:0016020;GO:0016020;GO:0016021;GO:0016021;GO:0030061;GO:0030061;GO:0030061;GO:0032592;GO:0032592;GO:0035725;GO:0042383;GO:0042383;GO:0042593;GO:0042593;GO:0042802;GO:…	K13754	-	P	0VCS5;0DPIS;18WTG;0UN4C;13JXP;1ATUF;0A0GN;1CYHD;KOG2399	solute carrier family 8 (sodium/lithium/calcium exchanger), member B1 [Source:MGI Symbol;Acc:MGI:2180781]	170756	Q925Q3
ENSMUSG00000075033	310.794	6.51277	615.075	94.4414	6.56135	4.73439e-36	1.76232e-34	16	55660316	55715648	-	6436	Nxpe3	GO:0003674;GO:0005575;GO:0008150;GO:0016020;GO:0016021;	-	-	S	0UMWX;18ZNY;0DER5;0IFPX;1AUXI;0V4D4;12U7P;1CPEY;09TE1	neurexophilin and PC-esterase domain family, member 3 [Source:MGI Symbol;Acc:MGI:2686598]	385658	B9EKK6
ENSMUSG00000047888	414.402	745.117	83.6879	0.112315	-3.15438	4.91831e-36	1.82624e-34	15	80595514	80825286	+	23677	Tnrc6b	GO:0000932;GO:0000932;GO:0003676;GO:0003723;GO:0005654;GO:0005737;GO:0006417;GO:0031047;GO:0031047;GO:0031047;GO:0035195;GO:0035278;GO:0060213;GO:0060213;GO:0060213;GO:1900153;GO:1900153;GO:1905618;GO:1905618;GO:1905618;GO:0003676;GO:0031047;GO:0035278;	K18412	-	S	18YGN;1CVUJ;0VAE4;0UQ29;12S0X;09ZGY;0DKZR;1AS9U;0IET2	trinucleotide repeat containing 6b [Source:MGI Symbol;Acc:MGI:2443730]	213988	Q8BKI2;Q8VD67;Q8BX83;Q8BWL0
ENSMUSG00000028211	580.303	1020.27	140.337	0.137549	-2.86198	6.18059e-36	2.28927e-34	4	11156431	11174379	+	6475	Trp53inp1	GO:0000045;GO:0005634;GO:0005634;GO:0005634;GO:0005634;GO:0005737;GO:0005776;GO:0005776;GO:0005776;GO:0005776;GO:0005829;GO:0005829;GO:0005829;GO:0006355;GO:0006914;GO:0006915;GO:0007050;GO:0008285;GO:0008285;GO:0009408;GO:0010506;GO:0010508;GO:0010508;GO:0010508;GO:0010628;GO:0010629;GO:0016209;GO:0016605;GO:0030336;GO:0031410;GO:0034644;GO:0043065;GO:0045893;GO:0045893;GO:0045893;GO:0045893;GO:…	K15310	-	K	1AWTF;0DI9P;13NHP;0UKQI;1CT06;09WZ5;0IJ9V;18XKI;0V7X6	transformation related protein 53 inducible nuclear protein 1 [Source:MGI Symbol;Acc:MGI:1926609]	60599	Q9QXE4;Q3UQK9
ENSMUSG00000031903	2403.84	4153.87	653.806	0.157397	-2.66752	7.4632e-36	2.75751e-34	8	106877031	106891347	+	3013	Pla2g15	GO:0006629;GO:0008374;GO:0004623;GO:0004806;GO:0005576;GO:0005615;GO:0005615;GO:0005615;GO:0005615;GO:0005615;GO:0005654;GO:0005654;GO:0005739;GO:0005764;GO:0005764;GO:0005764;GO:0006629;GO:0006629;GO:0006629;GO:0006631;GO:0006650;GO:0006650;GO:0006650;GO:0006651;GO:0006658;GO:0006658;GO:0006672;GO:0006672;GO:0006672;GO:0006672;GO:0008270;GO:0008270;GO:0008374;GO:0008374;GO:0008374;GO:0008374;GO:…	K06129	EC:3.1.1.5	I	1AU89;18V9D;0V6IX;12S4B;09VJS;KOG2369;0DGU9;0UIQZ;1CRIE	phospholipase A2, group XV [Source:MGI Symbol;Acc:MGI:2178076]	192654	Q8VEB4
ENSMUSG00000020638	27308.3	146.799	54469.8	371.05	8.53547	8.63094e-36	3.18112e-34	12	26519203	26529836	+	4163	Cmpk2	GO:0000166;GO:0004127;GO:0004127;GO:0004127;GO:0004127;GO:0004550;GO:0004550;GO:0004550;GO:0004550;GO:0004798;GO:0004798;GO:0004798;GO:0005524;GO:0005654;GO:0005737;GO:0005739;GO:0005739;GO:0005739;GO:0005739;GO:0006165;GO:0006165;GO:0006165;GO:0006221;GO:0006227;GO:0006227;GO:0006227;GO:0006233;GO:0006233;GO:0006233;GO:0006235;GO:0009041;GO:0009041;GO:0009041;GO:0009142;GO:0009142;GO:0009142;GO:…	K13809	EC:2.7.4.14	F	18VIN;1AXFD;0V8UG;0UMYT;09XWZ;13JW8;KOG3327;0DJ9U;1CU1T	cytidine monophosphate (UMP-CMP) kinase 2, mitochondrial [Source:MGI Symbol;Acc:MGI:99830]	22169	Q3U5Q7
ENSMUSG00000026896	18741	274.053	37208	135.769	7.08501	1.13174e-35	4.16103e-34	2	62426142	62476599	-	8165	Ifih1	GO:0000166;GO:0002376;GO:0003677;GO:0003723;GO:0003724;GO:0003725;GO:0003725;GO:0003725;GO:0003725;GO:0003727;GO:0003727;GO:0003727;GO:0003727;GO:0004386;GO:0005515;GO:0005515;GO:0005524;GO:0005524;GO:0005634;GO:0005737;GO:0005737;GO:0008270;GO:0008270;GO:0008270;GO:0008270;GO:0009615;GO:0009615;GO:0016787;GO:0016787;GO:0016925;GO:0016925;GO:0016925;GO:0032727;GO:0032727;GO:0032727;GO:0032728;GO:…	K12647	EC:3.6.4.13	A	1AYAQ;0V4TZ;190AY;KOG0354;1CTWW;0DF53;12NQ7;09TUS;0UQBF	interferon induced with helicase C domain 1 [Source:MGI Symbol;Acc:MGI:1918836]	71586	Q8R5F7;Q3TGP5;D2CGM4
ENSMUSG00000034041	383.161	691.259	75.0625	0.108588	-3.20306	1.52773e-35	5.60317e-34	8	85428078	85431569	+	2033	Lyl1	GO:0046983;GO:0000785;GO:0000978;GO:0000981;GO:0001955;GO:0001955;GO:0001955;GO:0003677;GO:0003677;GO:0003677;GO:0005634;GO:0006355;GO:0006355;GO:0006355;GO:0006357;GO:0030183;GO:0045893;GO:0045893;GO:0045893;GO:0046983;GO:0060216;	K15604	-	K	KOG4029;1AY1S;0V8ES;0UMG2;1CTJM;13NX1;0DIU9;1903B;09XGR	lymphoblastomic leukemia 1 [Source:MGI Symbol;Acc:MGI:96891]	17095	P27792
ENSMUSG00000015396	2549.33	608.709	4489.95	7.37618	2.88287	1.55075e-35	5.6737e-34	13	43938251	43956608	+	2572	Cd83	GO:0009897;GO:0014070;GO:0016020;GO:0016021;GO:0032713;GO:0032733;GO:0032743;GO:0043372;	K06510	-	T	0VD34;1AS84;18T2R;1CYUQ;0UT62;0DPVA;13JQF;0A279;0IKX7	CD83 antigen [Source:MGI Symbol;Acc:MGI:1328316]	12522	O88324
ENSMUSG00000052270	9111.14	32.0156	18190.3	568.169	9.15018	1.56314e-35	5.70506e-34	17	18108086	18114214	+	1296	Fpr2	GO:0001540;GO:0001540;GO:0001774;GO:0001934;GO:0002430;GO:0002768;GO:0004875;GO:0004930;GO:0004930;GO:0004930;GO:0004982;GO:0004982;GO:0004982;GO:0005124;GO:0005737;GO:0005886;GO:0005886;GO:0005886;GO:0006898;GO:0006935;GO:0006954;GO:0007165;GO:0007166;GO:0007186;GO:0007186;GO:0007186;GO:0007193;GO:0007200;GO:0007200;GO:0007204;GO:0014068;GO:0016020;GO:0016021;GO:0016021;GO:0019722;GO:0032930;GO:…	K04173	-	T	09YRX;194JK;1CTRF;0DNT1;0II0H;1AX0S;13FV7;0UP03;0V7XT	formyl peptide receptor 2 [Source:MGI Symbol;Acc:MGI:1278319]	14289	O88536
ENSMUSG00000020092	291.485	536.846	46.1236	0.0859159	-3.54093	2.01467e-35	7.33516e-34	10	61155435	61219309	-	4535	Pald1	GO:0005829;	-	-	S	0VCJ6;0DM2C;1AYMP;12TXY;0UUDK;0IIZG;0A1PD;190C7;1CY9C	phosphatase domain containing, paladin 1 [Source:MGI Symbol;Acc:MGI:1351623]	27355	P70261;A0A0R4J007
ENSMUSG00000027111	1183.67	2006.4	360.931	0.179889	-2.47482	2.12397e-35	7.71434e-34	2	71575960	71688760	+	9142	Itga6	GO:0005515;GO:0005515;GO:0005604;GO:0005886;GO:0005886;GO:0005912;GO:0007155;GO:0007155;GO:0007160;GO:0007229;GO:0008305;GO:0008305;GO:0009897;GO:0009925;GO:0009986;GO:0010811;GO:0010976;GO:0016020;GO:0016021;GO:0016323;GO:0022409;GO:0030056;GO:0030175;GO:0030335;GO:0031589;GO:0031668;GO:0031994;GO:0031994;GO:0034676;GO:0035878;GO:0038132;GO:0038132;GO:0042327;GO:0042475;GO:0043065;GO:0043236;GO:…	K06485	-	W	0V44B;0UMX6;18V8Y;KOG3637;0DMTK;12N24;1AXU6;09UEE;1CY9G	integrin alpha 6 [Source:MGI Symbol;Acc:MGI:96605]	16403	Q61739;Q6PEE8
ENSMUSG00000090215	382.366	81.6235	683.109	8.36902	3.06506	3.00202e-35	1.0877e-33	7	103978678	103986116	+	1850	Trim34b	GO:0000209;GO:0005654;GO:0005737;GO:0005829;GO:0008270;GO:0010468;GO:0010508;GO:0016567;GO:0019901;GO:0032880;GO:0042803;GO:0043123;GO:0045087;GO:0046596;GO:0046872;GO:0051092;GO:0061630;GO:0000209;GO:0005654;GO:0005737;GO:0005829;GO:0008270;GO:0010468;GO:0010508;GO:0016567;GO:0019901;GO:0032880;GO:0042803;GO:0043123;GO:0045087;GO:0046596;GO:0046872;GO:0051092;GO:0061630;	K11999	-	O	KOG2177;1AUBY;18SY8;0DQWN;13NFE;1D0YZ;0A2I9;0UJIK;0VFG6	tripartite motif-containing 34B [Source:MGI Symbol;Acc:MGI:4821264]	434218	K7N6K2
ENSMUSG00000028527	155.105	13.4842	296.725	22.0055	4.45979	3.08216e-35	1.11404e-33	4	101276474	101324192	+	4646	Ak4	GO:0000166;GO:0002082;GO:0002082;GO:0004017;GO:0004550;GO:0004550;GO:0004550;GO:0005524;GO:0005524;GO:0005525;GO:0005737;GO:0005739;GO:0005739;GO:0005739;GO:0005759;GO:0005759;GO:0005759;GO:0006139;GO:0006163;GO:0006165;GO:0006165;GO:0006165;GO:0006172;GO:0009142;GO:0009142;GO:0009142;GO:0016301;GO:0016310;GO:0016740;GO:0016776;GO:0019205;GO:0046033;GO:0046033;GO:0046033;GO:0046034;GO:0046034;GO:…	K00939	EC:2.7.4.3	F	1945X;13IR2;0UMTQ;0V8Q9;09XSR;1AX9Y;1CTWN;KOG3078;0DJ4R	adenylate kinase 4 [Source:MGI Symbol;Acc:MGI:87979]	11639	Q9WUR9;Q3U489
ENSMUSG00000021569	332.643	39.6029	625.683	15.7989	3.98175	3.17948e-35	1.14645e-33	13	74059466	74085903	-	3472	Trip13	GO:0000166;GO:0001556;GO:0001673;GO:0005515;GO:0005515;GO:0005524;GO:0005524;GO:0005634;GO:0005694;GO:0006302;GO:0006302;GO:0007094;GO:0007094;GO:0007094;GO:0007130;GO:0007131;GO:0007131;GO:0007131;GO:0007141;GO:0007144;GO:0007283;GO:0007286;GO:0016887;GO:0030154;GO:0042802;GO:0042802;GO:0048477;GO:0051321;GO:0051598;	K22399	-	O;L	1CWV6;0DMZ5;KOG0744;1ASQA;18TM6;0V8XF;12QUM;0UFP3;09XZQ	thyroid hormone receptor interactor 13 [Source:MGI Symbol;Acc:MGI:1916966]	69716	Q3UA06
ENSMUSG00000058099	4442.36	7305.32	1579.41	0.2162	-2.20956	3.30924e-35	1.19037e-33	15	82877174	82917507	-	7970	Nfam1	GO:0001819;GO:0004888;GO:0004888;GO:0004888;GO:0004888;GO:0005886;GO:0007165;GO:0007165;GO:0009986;GO:0016020;GO:0016021;GO:0016021;GO:0016021;GO:0016021;GO:0016021;GO:0030183;GO:0035556;GO:0035556;GO:0045121;GO:0045121;GO:0045577;GO:0045577;GO:0050853;GO:0050853;GO:0050861;GO:0050861;GO:0051091;GO:0051091;GO:0001819;GO:0004888;GO:0004888;GO:0004888;GO:0004888;GO:0005886;GO:0007165;GO:0007165;GO:…	-	-	T	193IK;0DRHV;0VESY;1B4W8;0A3Y2;13WFS;1D0QC;0J2TX;0UN39	Nfat activating molecule with ITAM motif 1 [Source:MGI Symbol;Acc:MGI:1921289]	74039	Q8R4V1
ENSMUSG00000063694	1339.95	424.258	2255.64	5.31667	2.41052	3.88976e-35	1.39584e-33	6	50539543	50543518	-	3404	Cycs	GO:0005634;GO:0005739;GO:0005739;GO:0005758;GO:0005758;GO:0005758;GO:0005829;GO:0005829;GO:0006122;GO:0006123;GO:0006915;GO:0006915;GO:0008635;GO:0009055;GO:0019899;GO:0020037;GO:0020037;GO:0022900;GO:0042743;GO:0043209;GO:0043280;GO:0043393;GO:0045155;GO:0046872;GO:0055114;GO:0070469;	K08738	-	C	0A7MI;193A5;0UVKJ;0VJKE;13SJE;1D3NI;1B5XJ;0DUA0;KOG3453	cytochrome c, somatic [Source:MGI Symbol;Acc:MGI:88578]	13063	P62897;Q56A15
ENSMUSG00000025337	3456.22	987.991	5924.44	5.99645	2.58411	4.87369e-35	1.74474e-33	5	130274572	130284371	-	2033	Sbds	GO:0000922;GO:0000922;GO:0000922;GO:0001833;GO:0002244;GO:0002244;GO:0002244;GO:0005634;GO:0005634;GO:0005634;GO:0005654;GO:0005654;GO:0005654;GO:0005730;GO:0005730;GO:0005730;GO:0005737;GO:0005737;GO:0005737;GO:0005819;GO:0005829;GO:0005829;GO:0005856;GO:0006364;GO:0006364;GO:0007052;GO:0007052;GO:0008017;GO:0008017;GO:0019843;GO:0019843;GO:0030282;GO:0030282;GO:0030595;GO:0030595;GO:0042254;GO:…	K14574	-	J	0V7P0;KOG2917;1B312;0UKCI;12PHJ;1CSR1;0DI0A;09WQH;18YBM	SBDS ribosome maturation factor [Source:MGI Symbol;Acc:MGI:1913961]	66711	P70122
ENSMUSG00000026942	1014.53	305.602	1723.45	5.63954	2.49558	4.89084e-35	1.74669e-33	2	25407994	25436952	-	5101	Traf2	GO:0000151;GO:0002637;GO:0002726;GO:0002947;GO:0004842;GO:0004842;GO:0004842;GO:0004842;GO:0005164;GO:0005164;GO:0005164;GO:0005164;GO:0005174;GO:0005515;GO:0005515;GO:0005515;GO:0005515;GO:0005737;GO:0005737;GO:0005737;GO:0005829;GO:0005829;GO:0005938;GO:0006915;GO:0007165;GO:0007165;GO:0007250;GO:0007250;GO:0008270;GO:0008270;GO:0008289;GO:0009898;GO:0009898;GO:0012506;GO:0016567;GO:0016740;GO:…	K03173	EC:2.3.2.27	O;T	0V3IY;1BBA7;0B5ND;1DFWV;0ISDM;13EZJ;0WIAF;0E90P	TNF receptor-associated factor 2 [Source:MGI Symbol;Acc:MGI:101835]	22030	P39429;Q3U8L1;Q8C6X9
ENSMUSG00000037111	578.025	1012.51	143.537	0.141763	-2.81844	5.13481e-35	1.82946e-33	3	51422740	51468300	-	10813	Setd7	GO:0002039;GO:0002039;GO:0003682;GO:0003682;GO:0005515;GO:0005634;GO:0005634;GO:0005634;GO:0005694;GO:0005694;GO:0005694;GO:0005730;GO:0005730;GO:0006325;GO:0006355;GO:0006479;GO:0006974;GO:0006974;GO:0008168;GO:0016279;GO:0016279;GO:0016279;GO:0016740;GO:0018022;GO:0018024;GO:0018024;GO:0018024;GO:0018024;GO:0018026;GO:0018026;GO:0018026;GO:0018027;GO:0018027;GO:0018027;GO:0032259;GO:0034968;GO:…	K11431	EC:2.1.1.364	K;B	0UFDZ;1CP6Z;0V44U;KOG1079;1ARB5;191FP;0DEH8;09T61;13I14	SET domain containing (lysine methyltransferase) 7 [Source:MGI Symbol;Acc:MGI:1920501]	73251	Q8VHL1
ENSMUSG00000042719	1814.58	347.327	3281.83	9.4488	3.24013	5.46818e-35	1.94361e-33	5	121535999	121582441	+	8298	Naa25	GO:0004596;GO:0005737;GO:0005737;GO:0005737;GO:0005794;GO:0005794;GO:0005829;GO:0005829;GO:0017196;GO:0031416;	K17973	-	Z	0V5GR;0UH8P;09UHG;13A41;KOG2053;19000;1CQGP;1AZ67;0DFT8	N(alpha)-acetyltransferase 25, NatB auxiliary subunit [Source:MGI Symbol;Acc:MGI:2442563]	231713	Q8BWZ3;B2RQV1
ENSMUSG00000047798	1337.54	2253.64	421.441	0.187005	-2.41885	5.94692e-35	2.10876e-33	11	115007040	115024818	-	5149	Cd300lf	GO:0001618;GO:0001786;GO:0002376;GO:0004888;GO:0005136;GO:0005515;GO:0005886;GO:0005886;GO:0008289;GO:0016020;GO:0016021;GO:0030316;GO:0033004;GO:0033004;GO:0034125;GO:0034125;GO:0035666;GO:0035666;GO:0035772;GO:0046718;GO:0097001;GO:0097001;GO:1902216;GO:2000426;GO:2000427;GO:0001618;GO:0001786;GO:0002376;GO:0004888;GO:0005136;GO:0005515;GO:0005886;GO:0005886;GO:0008289;GO:0016020;GO:0016021;GO:…	K20395	-	S;W;T	1AU12;0DJVP;0IZ4I;09YFG;0UNQN;19629;13T9V;1CUNY;0V9DA	CD300 molecule like family member F [Source:MGI Symbol;Acc:MGI:2442359]	246746	Q6SJQ7;A0A1C9ZQ14
ENSMUSG00000030401	142.492	10.6165	274.368	25.8435	4.69173	6.18974e-35	2.18968e-33	7	19016549	19030085	+	4585	Rtn2	GO:0003674;GO:0005783;GO:0005783;GO:0005783;GO:0005783;GO:0005789;GO:0005882;GO:0009986;GO:0014802;GO:0016020;GO:0016021;GO:0030018;GO:0030315;GO:0046324;GO:0065002;GO:1902430;GO:1902430;GO:0003674;GO:0005783;GO:0005783;GO:0005789;GO:0005882;GO:0014802;GO:0016020;GO:0016021;GO:0030018;GO:0030315;GO:0046324;GO:0065002;GO:1902430;	K20722	-	U	18X2A;09T8Z;13KAQ;0UFJ5;0V47Z;1ATCZ;0DEK5;KOG1792;1CPA3	reticulon 2 (Z-band associated protein) [Source:MGI Symbol;Acc:MGI:107612]	20167	O70622;Q6IM75
ENSMUSG00000030921	10908	1069.38	20746.7	19.4006	4.27803	6.26748e-35	2.21195e-33	7	104058232	104114400	-	4111	Trim30a	GO:0000209;GO:0003677;GO:0005634;GO:0005654;GO:0005737;GO:0005737;GO:0005737;GO:0005829;GO:0008270;GO:0009617;GO:0010468;GO:0010508;GO:0016567;GO:0019901;GO:0032715;GO:0032720;GO:0032880;GO:0034122;GO:0042803;GO:0043123;GO:0045087;GO:0045732;GO:0046596;GO:0046598;GO:0046872;GO:0051092;GO:0051865;GO:0061630;GO:1900226;GO:2000378;	-	-	O;K	0B6AK;0WJ0G;13FYK;1DGAS;1BBGY;197FW;0E9FG;0ITFH;0V3TY	tripartite motif-containing 30A [Source:MGI Symbol;Acc:MGI:98178]	20128	P15533
ENSMUSG00000039987	895.277	264.507	1526.05	5.7694	2.52842	7.11519e-35	2.50522e-33	5	20963661	21087122	-	6929	Phtf2	GO:0003677;GO:0005634;GO:0005783;GO:0016020;GO:0016021;GO:0003677;GO:0005634;	-	-	K	0V58Q;1AYP7;0DENH;0IF1F;18V1I;12SVX;0UJQX;09ZVF;1CW97	putative homeodomain transcription factor 2 [Source:MGI Symbol;Acc:MGI:1916020]	68770	Q8CB19;Q8C9D2;A0A0R4J1Q1
ENSMUSG00000000282	1063.69	1806.25	321.131	0.177788	-2.49177	8.46243e-35	2.97258e-33	11	74721746	74736551	+	4627	Mnt	GO:0000122;GO:0000122;GO:0000785;GO:0000977;GO:0000977;GO:0000978;GO:0000981;GO:0001227;GO:0001227;GO:0003677;GO:0003677;GO:0003682;GO:0003700;GO:0005515;GO:0005634;GO:0005634;GO:0005654;GO:0005654;GO:0006355;GO:0006357;GO:0007569;GO:0046983;GO:0051726;GO:2001234;GO:0046983;	K09115	-	K	0V2ZQ;KOG2483;1974W;1DF0E;13CCX;0WGFF;0E813;1BAWD;0B409	max binding protein [Source:MGI Symbol;Acc:MGI:109150]	17428	O08789
ENSMUSG00000073700	384.535	691.335	77.7338	0.11244	-3.15277	9.45978e-35	3.31513e-33	4	152093260	152102137	+	3986	Klhl21	GO:0004842;GO:0004842;GO:0004842;GO:0005737;GO:0005819;GO:0005827;GO:0005827;GO:0005827;GO:0005856;GO:0007049;GO:0016567;GO:0016567;GO:0016567;GO:0016567;GO:0031463;GO:0031463;GO:0031463;GO:0032465;GO:0032465;GO:0032465;GO:0035853;GO:0035853;GO:0035853;GO:0051301;GO:0097602;GO:0097602;	K10458	-	T	12SM4;0V55B;1CQ5Q;0UGS6;09U6C;18UKY;0DFFZ;KOG4441;1ASG5	kelch-like 21 [Source:MGI Symbol;Acc:MGI:1919288]	242785	Q3U410
ENSMUSG00000031015	3882.79	1373.29	6392.29	4.65471	2.21869	9.67727e-35	3.38343e-33	7	109820918	109882713	+	8090	Swap70	GO:0003677;GO:0003677;GO:0005515;GO:0005524;GO:0005634;GO:0005634;GO:0005634;GO:0005737;GO:0005737;GO:0005737;GO:0005737;GO:0005856;GO:0005886;GO:0005886;GO:0005886;GO:0007204;GO:0008064;GO:0015629;GO:0015629;GO:0016020;GO:0016444;GO:0030027;GO:0030835;GO:0032233;GO:0032880;GO:0033633;GO:0042995;GO:0045190;GO:0051017;GO:0060754;GO:1902309;	K20072	-	Z;T	190PA;1ATFK;1CQWQ;139RA;09UXN;0IIJW;0V5XK;0DG77;0UHVP	SWA-70 protein [Source:MGI Symbol;Acc:MGI:1298390]	20947	Q6A028
ENSMUSG00000021929	8872.5	1337.68	16407.3	12.2655	3.61653	1.14969e-34	4.01024e-33	14	61602660	61677323	-	4298	Kpna3	GO:0005634;GO:0005634;GO:0005654;GO:0005737;GO:0005737;GO:0006606;GO:0006607;GO:0008022;GO:0008139;GO:0015031;GO:0061608;GO:0061608;	K23583	-	U	0UQAN;0V809;09X23;18UNC;1CT39;KOG0166;0DICS;12RBS;1B01B	karyopherin (importin) alpha 3 [Source:MGI Symbol;Acc:MGI:1100863]	16648	O35344;Q543M7
ENSMUSG00000004359	498.843	67.3859	930.301	13.8056	3.78718	1.41809e-34	4.93494e-33	10	88510634	88520877	-	3841	Spic	GO:0000978;GO:0000981;GO:0001228;GO:0001824;GO:0003677;GO:0003700;GO:0005634;GO:0005634;GO:0006355;GO:0006357;GO:0030154;GO:0043565;GO:0045944;GO:0045944;GO:0003677;GO:0003700;GO:0006355;GO:0043565;	K09440	-	K	0A1FR;1CYUC;KOG3805;0DPV1;1AZPN;13H91;0UMZP;0VD2P;192QV	Spi-C transcription factor (Spi-1/PU.1 related) [Source:MGI Symbol;Acc:MGI:1341168]	20728	Q6P3D7
ENSMUSG00000025017	26730.3	7389.23	46071.3	6.23492	2.64037	1.43115e-34	4.96885e-33	19	41260816	41373541	-	5572	Pik3ap1	GO:0005102;GO:0005515;GO:0005515;GO:0005737;GO:0005737;GO:0005829;GO:0005829;GO:0005886;GO:0005886;GO:0014068;GO:0016020;GO:0034122;GO:0034134;GO:0034142;GO:0034154;GO:0034162;GO:0036312;GO:0036312;GO:0042802;GO:0050727;	K12230	-	T	18UX6;13KN1;0UHCY;09UKF;1CQJH;0IKKC;0DFW6;1AU9M;0V5JU	phosphoinositide-3-kinase adaptor protein 1 [Source:MGI Symbol;Acc:MGI:1933177]	83490	Q9EQ32
ENSMUSG00000031722	171.315	18.2388	324.392	17.7858	4.15265	1.9268e-34	6.6742e-33	8	110301760	110305804	-	1606	Hp	GO:0001889;GO:0002376;GO:0002526;GO:0004252;GO:0004252;GO:0005576;GO:0005576;GO:0005615;GO:0005615;GO:0005615;GO:0005783;GO:0005794;GO:0006508;GO:0006953;GO:0007219;GO:0009617;GO:0010942;GO:0010942;GO:0016209;GO:0030492;GO:0030492;GO:0030492;GO:0031638;GO:0031838;GO:0042542;GO:0042742;GO:0042802;GO:0051354;GO:0072562;GO:0072562;GO:0098869;GO:2000296;	K16142	-	O;W;E	13N0R;0VF3W;KOG3627;18TY1;1CU98;1B3ZT;0DRTE;0UTJ0;0A494	haptoglobin [Source:MGI Symbol;Acc:MGI:96211]	15439	Q61646;Q3UBS3
ENSMUSG00000024339	1484.86	301.074	2668.64	8.86372	3.14791	1.99175e-34	6.88325e-33	17	34422501	34435295	+	3781	Tap2	GO:0000166;GO:0000166;GO:0001916;GO:0002237;GO:0002250;GO:0002376;GO:0002481;GO:0002485;GO:0002489;GO:0002591;GO:0005515;GO:0005524;GO:0005524;GO:0005524;GO:0005783;GO:0005783;GO:0005789;GO:0015031;GO:0015433;GO:0015433;GO:0015440;GO:0015440;GO:0015833;GO:0015833;GO:0015833;GO:0015833;GO:0016020;GO:0016020;GO:0016021;GO:0016021;GO:0016021;GO:0016021;GO:0016607;GO:0016887;GO:0019885;GO:0019885;GO:…	K05654	-	Q;U	0UHUR;KOG0058;09UWX;1CQW0;18W8U;0V5WR;1ATGI;12RBY;0DG6C	transporter 2, ATP-binding cassette, sub-family B (MDR/TAP) [Source:MGI Symbol;Acc:MGI:98484]	21355	P36371;Q792S7
ENSMUSG00000029217	1002.5	1703.57	301.434	0.176943	-2.49864	2.0646e-34	7.11859e-33	5	72913059	73025826	-	3744	Tec	GO:0000166;GO:0002250;GO:0002376;GO:0004672;GO:0004713;GO:0004713;GO:0004715;GO:0004715;GO:0005524;GO:0005524;GO:0005856;GO:0005886;GO:0006468;GO:0007229;GO:0010543;GO:0016301;GO:0016310;GO:0016740;GO:0018108;GO:0035556;GO:0038083;GO:0042246;GO:0046872;GO:0050731;GO:0050853;GO:0000166;GO:0002250;GO:0002376;GO:0004672;GO:0004713;GO:0004713;GO:0004715;GO:0005524;GO:0005524;GO:0006468;GO:0016301;GO:…	K07364	EC:2.7.10.2	T	195ID;0V4AE;0UK02;1B3TN;12TTS;1CRCG;KOG0197;09VT7;0DH1H	tec protein tyrosine kinase [Source:MGI Symbol;Acc:MGI:98662]	21682	P24604;Q3U436;Q3TH41
ENSMUSG00000029313	6632.61	2428.39	10836.8	4.46254	2.15787	2.30016e-34	7.91254e-33	5	103840240	104003188	+	9458	Aff1	GO:0005634;GO:0005634;GO:0010468;GO:0010468;GO:0005634;GO:0005634;GO:0008023;GO:0010468;	K15184	-	K	1AUUS;1CPFG;0V6ID;13I7E;09VJ9;0IGJB;0UKUW;18T0P;0DERP	AF4/FMR2 family, member 1 [Source:MGI Symbol;Acc:MGI:1100819]	17355	A3KMF4;E9Q921;Q3UP77
ENSMUSG00000021483	250.071	464.555	35.5869	0.0766043	-3.70643	2.47428e-34	8.49201e-33	13	64580128	64589587	+	6775	Cdk20	GO:0000166;GO:0001843;GO:0004672;GO:0004674;GO:0004693;GO:0004693;GO:0005515;GO:0005524;GO:0005524;GO:0005634;GO:0005634;GO:0005654;GO:0005737;GO:0005929;GO:0006468;GO:0006468;GO:0006468;GO:0007049;GO:0007275;GO:0016301;GO:0016310;GO:0016740;GO:0021508;GO:0031076;GO:0042995;GO:0048706;GO:0051301;GO:0051726;GO:0060021;GO:0060045;GO:0061512;GO:0106311;GO:1901620;GO:1901621;GO:1903317;GO:1990403;GO:…	K08817	EC:2.7.11.22	D;K;L	0V4ME;0DHB0;09W1Y;1AW62;1CS13;0UJEC;12PN8;18S57;KOG0659	cyclin-dependent kinase 20 [Source:MGI Symbol;Acc:MGI:2145349]	105278	Q9JHU3
ENSMUSG00000021690	312.992	570.661	55.3219	0.0969435	-3.36671	2.51551e-34	8.61374e-33	13	93566609	93636316	-	8858	Jmy	GO:0003713;GO:0003779;GO:0006357;GO:0031252;GO:0034314;GO:0045893;GO:0070060;GO:0003713;GO:0006357;GO:0034314;GO:0045893;GO:0070060;	K24045	-	Z;K	0V4AZ;0DEP5;1ATJX;0UKT9;09TBT;1CWJN;190XI;12SH6;0IF4S	junction-mediating and regulatory protein [Source:MGI Symbol;Acc:MGI:1913096]	57748	Q9QXM1;A0A0R4J0V4
ENSMUSG00000000149	3056.06	5033.1	1079.02	0.214384	-2.22173	2.59914e-34	8.87981e-33	5	140744163	140816186	-	3416	Gna12	GO:0000166;GO:0001664;GO:0001664;GO:0001701;GO:0003924;GO:0003924;GO:0003924;GO:0005525;GO:0005737;GO:0005834;GO:0005834;GO:0005886;GO:0007165;GO:0007165;GO:0007186;GO:0007186;GO:0007188;GO:0007266;GO:0007266;GO:0007266;GO:0008360;GO:0010762;GO:0016020;GO:0016328;GO:0019001;GO:0030154;GO:0031526;GO:0031526;GO:0031526;GO:0031683;GO:0031683;GO:0031752;GO:0031752;GO:0031752;GO:0032006;GO:0032006;GO:…	K04346	-	T;D	0UFGJ;09X7M;1ARD8;1CP7W;KOG0082;0DEI3;13IT4;0V867;18Y9N	guanine nucleotide binding protein, alpha 12 [Source:MGI Symbol;Acc:MGI:95767]	14673	P27600
ENSMUSG00000036622	4348.15	7125.8	1570.51	0.220397	-2.18182	2.61608e-34	8.91731e-33	4	140714184	140734641	+	6000	Atp13a2	GO:0000166;GO:0000166;GO:0005524;GO:0006812;GO:0016020;GO:0016021;GO:0016021;GO:0016887;GO:0046872;GO:0000166;GO:0000166;GO:0000421;GO:0005524;GO:0005764;GO:0005764;GO:0005764;GO:0005765;GO:0005765;GO:0005765;GO:0005768;GO:0005770;GO:0005770;GO:0005771;GO:0005771;GO:0005776;GO:0005776;GO:0006812;GO:0006874;GO:0006874;GO:0006874;GO:0006879;GO:0006879;GO:0006882;GO:0006882;GO:0006914;GO:0006914;GO:…	K13526	EC:7.2.2.-	P	12PU6;0DEPA;0V4B6;09TBZ;1B4ZP;KOG0208;0UT8R;1CUFE;18ZCV	ATPase type 13A2 [Source:MGI Symbol;Acc:MGI:1922022]	74772	Q9CTG6
ENSMUSG00000045362	426.756	777.204	76.3074	0.0981819	-3.3484	3.24367e-34	1.10314e-32	7	143161396	143182459	-	3218	Tnfrsf26	GO:0016020;GO:0016021;GO:0005886;GO:0009986;GO:0016020;GO:0016021;GO:0036462;GO:0043065;	K05161	-	T	196G5;1B8BX;1D5QS;0DWCJ;1482D;0AAZX;0VN00;0JFKD;0UWVH	tumor necrosis factor receptor superfamily, member 26 [Source:MGI Symbol;Acc:MGI:2651928]	244237	P83626;Q3U3N2
ENSMUSG00000024338	692.885	188.25	1197.52	6.36133	2.66933	3.28042e-34	1.11311e-32	17	34416695	34420428	+	3381	Psmb8	GO:0000502;GO:0000502;GO:0004298;GO:0004298;GO:0005634;GO:0005737;GO:0005839;GO:0006508;GO:0008233;GO:0016787;GO:0030154;GO:0051603;GO:0000502;GO:0000502;GO:0000502;GO:0000502;GO:0002376;GO:0004175;GO:0004298;GO:0004298;GO:0005515;GO:0005634;GO:0005634;GO:0005654;GO:0005737;GO:0005737;GO:0005829;GO:0005839;GO:0005839;GO:0005839;GO:0005839;GO:0006508;GO:0008233;GO:0010499;GO:0016787;GO:0019774;GO:…	K02740	EC:3.4.25.1	O	0V6J5;KOG0175;12PAC;0UH93;0DGUM;18SWK;1AS2J;09VK0;1CRIR	proteasome (prosome, macropain) subunit, beta type 8 (large multifunctional peptidase 7) [Source:MGI Symbol;Acc:MGI:1346527]	16913	P28063
ENSMUSG00000095609	196.616	25.4373	367.794	14.4588	3.85388	3.29459e-34	1.11539e-32	13	120496141	120513730	-	4572	Gm21188	GO:0038023;GO:0038023;	-	-	-	-	predicted gene, 21188 [Source:MGI Symbol;Acc:MGI:5434543]	100861753	Q3T9V6
ENSMUSG00000031431	418.356	745.929	90.7823	0.121704	-3.03856	3.43278e-34	1.15955e-32	X	139440277	139501408	-	4341	Tsc22d3	GO:0000122;GO:0005634;GO:0005634;GO:0005737;GO:0005737;GO:0006357;GO:0006970;GO:0043426;GO:0048642;GO:0070236;GO:0005515;GO:0005634;GO:0005634;GO:0005737;GO:0006357;GO:0006970;GO:0070236;GO:0006357;	-	-	K	0V3EF;0WHUH;1DFP2;0B57Y;0E8RZ;1BB76;0IRR1;13EBV	TSC22 domain family, member 3 [Source:MGI Symbol;Acc:MGI:1196284]	14605	Q9Z2S7
ENSMUSG00000020091	1804.85	3003.9	605.804	0.201672	-2.30991	3.49839e-34	1.17905e-32	10	61264270	61288440	-	5784	Eif4ebp2	GO:0005515;GO:0005737;GO:0006417;GO:0006446;GO:0007613;GO:0008190;GO:0008190;GO:0008190;GO:0008286;GO:0017148;GO:0019933;GO:0030371;GO:0031929;GO:0035176;GO:0045947;GO:0045947;GO:0045947;GO:0048167;GO:0050804;GO:0098794;GO:0098794;GO:0005515;GO:0005737;GO:0006417;GO:0006446;GO:0007613;GO:0008190;GO:0008190;GO:0008190;GO:0008286;GO:0017148;GO:0019933;GO:0030371;GO:0031929;GO:0035176;GO:0045947;GO:…	K18644	-	J	0J2Z0;1932T;13WGN;1B5H9;0UUZF;0A6NE;0VIV1;0DTN3;1D2ZN	eukaryotic translation initiation factor 4E binding protein 2 [Source:MGI Symbol;Acc:MGI:109198]	13688	P70445;Q3UFP6
ENSMUSG00000031444	1746.3	153.388	3339.22	21.7697	4.44425	3.74709e-34	1.26003e-32	8	13087308	13106676	+	2731	F10	GO:0004252;GO:0004252;GO:0004252;GO:0005509;GO:0005543;GO:0005576;GO:0005576;GO:0005615;GO:0005783;GO:0006508;GO:0006508;GO:0007596;GO:0007596;GO:0007596;GO:0007596;GO:0007599;GO:0008233;GO:0008236;GO:0016020;GO:0016787;GO:0043231;GO:0051897;GO:0004252;GO:0004252;GO:0005509;GO:0005543;GO:0005576;GO:0005576;GO:0006508;GO:0006508;GO:0007596;GO:0007596;GO:0007599;GO:0008233;GO:0008236;GO:0016787;GO:…	K01314	EC:3.4.21.6	O	1B0HW;09V8X;12TMD;0UK0W;0DH34;1CRTD;18VEJ;0V6TJ;0IGPV	coagulation factor X [Source:MGI Symbol;Acc:MGI:103107]	14058	O88947;Q3TBR2
ENSMUSG00000026536	1355.56	73.1211	2637.99	36.077	5.17301	4.05517e-34	1.36057e-32	1	173723911	173740612	-	1785	Ifi211	GO:0000122;GO:0000978;GO:0001227;GO:0002218;GO:0002218;GO:0003690;GO:0003690;GO:0005634;GO:0005634;GO:0005654;GO:0005730;GO:0005730;GO:0005829;GO:0008134;GO:0009617;GO:0016607;GO:0032731;GO:0034399;GO:0035458;GO:0035458;GO:0042802;	-	-	K	1CTDT;0UM8D;0DINX;0J5NP;194Q0;1B2J8;1408X;0V89T;09XBF	interferon activated gene 211 [Source:MGI Symbol;Acc:MGI:3041120]	381308	P0DOV1
ENSMUSG00000071042	128.927	253.233	4.62116	0.0182486	-5.77607	4.23603e-34	1.41807e-32	17	75742891	75836049	+	5840	Rasgrp3	GO:0005085;GO:0005085;GO:0005085;GO:0005096;GO:0005096;GO:0005509;GO:0005737;GO:0005829;GO:0005886;GO:0007264;GO:0007265;GO:0007265;GO:0019900;GO:0031267;GO:0032045;GO:0035556;GO:0043087;GO:0043087;GO:0043547;GO:0048471;GO:0005085;GO:0005085;GO:0005085;GO:0005096;GO:0005096;GO:0005096;GO:0005509;GO:0005737;GO:0005829;GO:0005886;GO:0007264;GO:0007265;GO:0007265;GO:0019900;GO:0031267;GO:0032045;GO:…	K12362	-	T	0KD39;0WCKQ;0E5KQ;0V12G;0B045;14T9H;1DCKN	RAS, guanyl releasing protein 3 [Source:MGI Symbol;Acc:MGI:3028579]	240168	Q6NZH9
ENSMUSG00000020261	1432.73	2397.85	467.609	0.195012	-2.35837	5.65811e-34	1.88991e-32	11	55095176	55127156	+	5626	Slc36a1	GO:0003333;GO:0005280;GO:0005280;GO:0005368;GO:0005368;GO:0005764;GO:0005764;GO:0005764;GO:0005765;GO:0005783;GO:0005783;GO:0005886;GO:0005886;GO:0005886;GO:0006865;GO:0015078;GO:0015078;GO:0015171;GO:0015175;GO:0015175;GO:0015180;GO:0015180;GO:0015187;GO:0015187;GO:0015193;GO:0015193;GO:0015293;GO:0015734;GO:0015734;GO:0015804;GO:0015804;GO:0015808;GO:0015808;GO:0015816;GO:0015816;GO:0015824;GO:…	K14209	-	P;E	KOG1304;12P1R;1CQGE;18TTT;09UH5;0V5GF;1ASWJ;0UGSB;0DFSZ	solute carrier family 36 (proton/amino acid symporter), member 1 [Source:MGI Symbol;Acc:MGI:2445299]	215335	Q8K4D3;Q5F227
ENSMUSG00000001348	1950.31	670.115	3230.51	4.82083	2.26928	7.74009e-34	2.57957e-32	9	22038023	22047007	-	2030	Acp5	GO:0001503;GO:0003993;GO:0003993;GO:0003993;GO:0003993;GO:0005764;GO:0005764;GO:0008198;GO:0008198;GO:0008199;GO:0008199;GO:0016311;GO:0016787;GO:0016787;GO:0032496;GO:0032691;GO:0032695;GO:0032720;GO:0032929;GO:0034097;GO:0045019;GO:0045453;GO:0045453;GO:0046872;GO:0050728;GO:0050830;GO:0060349;GO:0001503;GO:0003993;GO:0003993;GO:0003993;GO:0003993;GO:0005764;GO:0005764;GO:0008198;GO:0008198;GO:…	K14379	EC:3.1.3.2	O	18WGQ;1B2SR;KOG2679;0VCQA;0DPGS;0A1UK;0USUE;1CYF5;138I5	acid phosphatase 5, tartrate resistant [Source:MGI Symbol;Acc:MGI:87883]	11433	Q05117
ENSMUSG00000002602	4842.89	1625.86	8059.93	4.95732	2.30956	8.78833e-34	2.92241e-32	7	25456698	25488130	-	5033	Axl	GO:0000166;GO:0001618;GO:0001764;GO:0001779;GO:0001779;GO:0001786;GO:0001786;GO:0001818;GO:0001961;GO:0001961;GO:0001974;GO:0002376;GO:0004672;GO:0004713;GO:0004713;GO:0004713;GO:0004714;GO:0004714;GO:0005515;GO:0005524;GO:0005524;GO:0005615;GO:0005615;GO:0005886;GO:0005886;GO:0005886;GO:0005887;GO:0006468;GO:0006909;GO:0006909;GO:0006909;GO:0006954;GO:0007167;GO:0007169;GO:0007275;GO:0007283;GO:…	K05115	EC:2.7.10.1	T	1AWBG;13IZU;18X98;0DHUI;0V7HR;0IG6I;1CSU6;0UKVD;09WJ5	AXL receptor tyrosine kinase [Source:MGI Symbol;Acc:MGI:1347244]	26362	Q00993;Q8CCF8
ENSMUSG00000048200	143.494	279.061	7.92592	0.0284021	-5.13786	9.58381e-34	3.17987e-32	7	141041007	141046526	+	2764	Cracr2b	GO:0002115;GO:0002115;GO:0002115;GO:0005509;GO:0005515;GO:0005737;GO:0034613;GO:2001256;GO:0005509;GO:0005509;GO:0005509;	K17199	-	T;P	1DDX5;0IVA9;0V226;12SQK;196ZH;0VCVV;1BAHR;0A20R;0E70F	calcium release activated channel regulator 2B [Source:MGI Symbol;Acc:MGI:2446129]	213573	Q80ZJ8
ENSMUSG00000027776	879.177	0.358181	1757.99	4908.12	12.261	1.03393e-33	3.42295e-32	3	68597977	68605880	+	1701	Il12a	GO:0001916;GO:0002860;GO:0005125;GO:0005125;GO:0005143;GO:0005576;GO:0005576;GO:0005615;GO:0005615;GO:0006955;GO:0007050;GO:0007165;GO:0008083;GO:0008083;GO:0008083;GO:0009615;GO:0010224;GO:0016477;GO:0032496;GO:0032700;GO:0032729;GO:0032816;GO:0032946;GO:0034393;GO:0042163;GO:0042531;GO:0043514;GO:0045513;GO:0045785;GO:0045954;GO:0046982;GO:0048662;GO:0050671;GO:0050709;GO:0050830;GO:0051135;GO:…	K05406	-	W	0IVIR;0DQ86;13N0A;0URJP;0A2KK;0VDGJ;1B3YV;1CZ9U;193GN	interleukin 12a [Source:MGI Symbol;Acc:MGI:96539]	16159	P43431;Q549G3
ENSMUSG00000090946	2940.28	1045.91	4834.66	4.62245	2.20866	1.15366e-33	3.8109e-32	12	32428703	32432942	+	4240	Ccdc71l	GO:0003674;GO:0005575;GO:0008150;	-	-	S	0DRH3;1B527;1D02D;196GN;13UV7;0VHZY;0J187;0A7A5;0UUDF	coiled-coil domain containing 71 like [Source:MGI Symbol;Acc:MGI:1919373]	72123	E9Q4T4
ENSMUSG00000079020	395.158	705.3	85.0153	0.120538	-3.05244	1.32048e-33	4.35234e-32	15	73449273	73517611	-	8471	Slc45a4	GO:0008506;GO:0008506;GO:0015770;GO:0016020;GO:0016020;GO:0016021;GO:0016020;GO:0016021;GO:0008506;GO:0008506;GO:0015770;GO:0016020;GO:0016020;GO:0016021;GO:0008506;GO:0008506;GO:0015770;GO:0016020;GO:0016020;GO:0016021;GO:0008506;GO:0008506;GO:0015770;GO:0016020;GO:0016020;GO:0016021;	K15378	-	P;G	0V0UV;0AZTW;196Q7;1DCBY;0KCSQ;14SYF;1B9TP;0WCA9;0E5BW	solute carrier family 45, member 4 [Source:MGI Symbol;Acc:MGI:2146236]	106068	Q0P5V9
ENSMUSG00000022831	9745.18	3648.18	15842.2	4.34248	2.11852	1.41561e-33	4.65564e-32	16	36755345	36783574	+	2525	Hcls1	GO:0000122;GO:0001085;GO:0001085;GO:0003779;GO:0005515;GO:0005515;GO:0005515;GO:0005634;GO:0005634;GO:0005634;GO:0005667;GO:0005667;GO:0005737;GO:0005737;GO:0005737;GO:0005739;GO:0005829;GO:0005829;GO:0005884;GO:0005886;GO:0005886;GO:0005886;GO:0008284;GO:0009725;GO:0014068;GO:0014068;GO:0017124;GO:0019901;GO:0019901;GO:0030041;GO:0030218;GO:0030427;GO:0030833;GO:0030833;GO:0030833;GO:0030854;GO:…	K06106	-	Z;B	0IFV2;12STU;0DIR8;09VCP;0V8BW;1CTGA;190QM;0UP8V;1B3BZ	hematopoietic cell specific Lyn substrate 1 [Source:MGI Symbol;Acc:MGI:104568]	15163	P49710;Q8CA06
ENSMUSG00000036155	1979.48	3277.4	681.549	0.207954	-2.26566	1.51668e-33	4.9771e-32	1	127132752	127416073	+	10291	Mgat5	GO:0000139;GO:0004864;GO:0004864;GO:0005576;GO:0005794;GO:0005794;GO:0005794;GO:0006486;GO:0006487;GO:0006487;GO:0006487;GO:0006487;GO:0008375;GO:0016020;GO:0016020;GO:0016020;GO:0016021;GO:0016740;GO:0016757;GO:0016757;GO:0018215;GO:0018279;GO:0018279;GO:0018279;GO:0030144;GO:0030144;GO:0030144;GO:0030144;GO:0030144;GO:0030145;GO:0030145;GO:0030145;GO:0030335;GO:0030335;GO:0043204;GO:1903614;GO:…	K00744	EC:2.4.1.155	G	12N4P;1CPBG;0IDYS;0DEMK;0V49B;0UT9T;1903I;1AZQ9;09TA9	mannoside acetylglucosaminyltransferase 5 [Source:MGI Symbol;Acc:MGI:894701]	107895	Q8R4G6;Q059T5
ENSMUSG00000029561	6639.05	390.13	12888	33.0351	5.04593	2.2341e-33	7.31534e-32	5	115034997	115050295	+	6374	Oasl2	GO:0000166;GO:0001730;GO:0001730;GO:0001730;GO:0001730;GO:0002376;GO:0003723;GO:0003725;GO:0003725;GO:0003725;GO:0003725;GO:0005524;GO:0005654;GO:0005829;GO:0006164;GO:0009615;GO:0016020;GO:0016740;GO:0016779;GO:0016779;GO:0045071;GO:0045087;GO:0046872;GO:0051607;GO:0051607;GO:0051607;GO:0060700;GO:0001730;GO:0003725;GO:0051607;GO:0001730;GO:0003725;GO:0016779;GO:0051607;GO:0001730;GO:0003725;GO:…	K14608	-	H;J;O	0DF4M;0V4TK;1CP6T;KOG0001;0UR6E;1B7D6;09TUC;12QYV	2'-5' oligoadenylate synthetase-like 2 [Source:MGI Symbol;Acc:MGI:1344390]	23962	Q9Z2F2
ENSMUSG00000062901	1523.78	2538.36	509.2	0.200602	-2.31759	2.43898e-33	7.96874e-32	16	19916292	19947971	+	10183	Klhl24	GO:0005737;GO:0005737;GO:0005737;GO:0005912;GO:0005912;GO:0005912;GO:0016567;GO:0016567;GO:0016567;GO:0030054;GO:0030057;GO:0030057;GO:0030057;GO:0030424;GO:0031463;GO:0031463;GO:0031463;GO:0042995;GO:0043204;GO:0045109;GO:0045109;GO:0045109;GO:0051865;GO:0051865;GO:0051865;GO:2000312;GO:2000312;GO:2000312;	K10461	-	T	09UF7;0UJH7;0DM9H;18ZYA;1AS70;0VAMZ;13K5B;1CW4N;KOG4441	kelch-like 24 [Source:MGI Symbol;Acc:MGI:1923035]	75785	Q8BRG6
ENSMUSG00000028583	536.272	141.516	931.028	6.57896	2.71786	2.76036e-33	8.99427e-32	4	142994001	143026134	-	1817	Pdpn	GO:0000902;GO:0000902;GO:0001726;GO:0001946;GO:0003333;GO:0005102;GO:0005102;GO:0005102;GO:0005515;GO:0005829;GO:0005829;GO:0005886;GO:0005886;GO:0006693;GO:0006833;GO:0007155;GO:0007165;GO:0007266;GO:0007266;GO:0007266;GO:0007275;GO:0008283;GO:0008285;GO:0008360;GO:0009897;GO:0010572;GO:0010718;GO:0010718;GO:0010718;GO:0015884;GO:0016020;GO:0016020;GO:0016021;GO:0016323;GO:0016323;GO:0016323;GO:…	K16778	-	W;T	1B5SB;13XJM;19435;1D3DH;0A8GE;0UVAP;0J49G;0VJYA;0DTNQ	podoplanin [Source:MGI Symbol;Acc:MGI:103098]	14726	Q62011
ENSMUSG00000026470	2282.19	805.376	3759	4.66739	2.22262	2.76488e-33	8.99427e-32	1	155034461	155084002	+	10637	Stx6	GO:0000139;GO:0000149;GO:0005484;GO:0005484;GO:0005515;GO:0005515;GO:0005654;GO:0005654;GO:0005769;GO:0005769;GO:0005794;GO:0005794;GO:0005794;GO:0005794;GO:0005802;GO:0005802;GO:0005829;GO:0005829;GO:0006886;GO:0006886;GO:0006906;GO:0006906;GO:0006906;GO:0007032;GO:0008021;GO:0008021;GO:0012505;GO:0015031;GO:0016020;GO:0016020;GO:0016020;GO:0016021;GO:0016021;GO:0016021;GO:0016021;GO:0016189;GO:…	K08498	-	U	1CRAZ;0UIFA;KOG3202;0DGM5;1922U;09VCR;0V6BT;12P84;1B1IT	syntaxin 6 [Source:MGI Symbol;Acc:MGI:1926235]	58244	Q9JKK1
ENSMUSG00000067714	132.155	258.383	5.92656	0.0229371	-5.44617	3.13295e-33	1.01695e-31	6	125044883	125059435	+	1515	Lpar5	GO:0004930;GO:0004930;GO:0007165;GO:0007186;GO:0007186;GO:0016020;GO:0016021;GO:0016021;GO:0004930;GO:0004930;GO:0007165;GO:0007186;GO:0007186;GO:0016020;GO:0016021;GO:0016021;GO:0004930;GO:0004930;GO:0007165;GO:0007186;GO:0007186;GO:0016020;GO:0016021;GO:0016021;	K08390	-	T	1913R;0VDB5;0DPNY;0A2FC;1AUWV;0IF9D;13IF8;1CZ3G;0USKY	lysophosphatidic acid receptor 5 [Source:MGI Symbol;Acc:MGI:2685918]	381810	Q149R9;G3X9K0
ENSMUSG00000038178	8394.13	13604.7	3183.53	0.234002	-2.09541	3.44358e-33	1.11536e-31	11	75422520	75468401	+	10042	Slc43a2	GO:0015179;GO:0015807;GO:0016020;GO:0016021;GO:0055085;GO:1902475;GO:0005886;GO:0015175;GO:0015179;GO:0015179;GO:0015179;GO:0015804;GO:0015807;GO:0015807;GO:0016020;GO:0016021;GO:0022857;GO:0051956;GO:0055085;GO:0060358;GO:1902475;GO:0005886;GO:0015175;GO:0015179;GO:0015179;GO:0015179;GO:0015804;GO:0015807;GO:0015807;GO:0016020;GO:0016021;GO:0022857;GO:0051956;GO:0055085;GO:0060358;GO:1902475;GO:…	K08229	-	P	1CTQC;0IHJQ;0V6IG;194FX;09VJC;13CV8;0DGTZ;0URU3;1AW1A	solute carrier family 43, member 2 [Source:MGI Symbol;Acc:MGI:2442746]	215113	Q8CGA3
ENSMUSG00000056116	2918.34	478.53	5358.14	11.1971	3.48505	3.84577e-33	1.24294e-31	17	36348020	36353639	-	3414	H2-T22	GO:0002476;GO:0005615;GO:0009897;GO:0016020;GO:0016021;GO:0002476;GO:0005615;GO:0009897;GO:0002476;GO:0005615;GO:0009897;GO:0016020;GO:0016021;GO:0002476;GO:0005615;GO:0009897;GO:0016020;GO:0016021;	K06751	-	-	-	histocompatibility 2, T region locus 22 [Source:MGI Symbol;Acc:MGI:95956]	15039	Q9BCZ1
ENSMUSG00000027613	2566.11	916.724	4215.49	4.59842	2.20114	4.23325e-33	1.36522e-31	2	155661752	155668845	-	2702	Eif6	GO:0000054;GO:0000054;GO:0000460;GO:0000470;GO:0003743;GO:0005634;GO:0005634;GO:0005634;GO:0005638;GO:0005654;GO:0005654;GO:0005730;GO:0005730;GO:0005737;GO:0005737;GO:0005737;GO:0005829;GO:0005882;GO:0006110;GO:0006412;GO:0006413;GO:0030687;GO:0032868;GO:0035195;GO:0035195;GO:0035195;GO:0035278;GO:0035278;GO:0035278;GO:0042254;GO:0042256;GO:0042256;GO:0042256;GO:0042256;GO:0042273;GO:0042304;GO:…	K03264	-	J	KOG3185;0DKY3;1AZT5;0UQU0;19209;12NJZ;09ZFI;1CVT3;0V7M2	eukaryotic translation initiation factor 6 [Source:MGI Symbol;Acc:MGI:1196288]	16418	O55135;Q545K4
ENSMUSG00000036636	6566.28	2395.89	10736.7	4.4813	2.16392	4.4208e-33	1.42264e-31	17	25352365	25381078	+	5291	Clcn7	GO:0005247;GO:0005247;GO:0005654;GO:0006811;GO:0006821;GO:0009268;GO:0016020;GO:0016020;GO:0016021;GO:0031410;GO:0055085;GO:1902476;GO:0000166;GO:0005247;GO:0005247;GO:0005515;GO:0005524;GO:0005654;GO:0005764;GO:0005765;GO:0006811;GO:0006821;GO:0009268;GO:0015108;GO:0015297;GO:0016020;GO:0016020;GO:0016021;GO:0031410;GO:0043231;GO:0055085;GO:1902476;GO:0005247;GO:0006821;GO:0016020;GO:0016020;GO:…	K05016	-	P	1ASKW;KOG0474;0DG85;0UR1I;12SW6;19076;0V91M;1CQXK;09Y45	chloride channel, voltage-sensitive 7 [Source:MGI Symbol;Acc:MGI:1347048]	26373	O70496;Q6RUT9
ENSMUSG00000022389	746.577	1277.15	216	0.169126	-2.56383	6.26614e-33	2.01216e-31	15	81686622	81711064	+	7867	Tef	GO:0000978;GO:0000978;GO:0000981;GO:0001228;GO:0003677;GO:0003690;GO:0003700;GO:0005515;GO:0005634;GO:0005634;GO:0005634;GO:0005634;GO:0006355;GO:0006357;GO:0006357;GO:0042802;GO:0043565;GO:0043565;GO:0044877;GO:0045944;GO:0048511;GO:1990837;GO:0003700;GO:0005634;GO:0005634;GO:0006357;GO:0043565;GO:0000978;GO:0000978;GO:0000981;GO:0001228;GO:0003677;GO:0003690;GO:0003700;GO:0005515;GO:0005634;GO:…	K09058	-	K	0DQH3;0A2V0;1ASAE;0UGIC;1CZJ9;13J52;18T0K;0VDQP;KOG3119	thyrotroph embryonic factor [Source:MGI Symbol;Acc:MGI:98663]	21685	Q9JLC6
ENSMUSG00000076431	139.712	271.542	7.88192	0.0290265	-5.10648	7.80516e-33	2.50099e-31	13	29132902	29137696	-	4795	Sox4	GO:0000785;GO:0000976;GO:0000978;GO:0000978;GO:0000978;GO:0000978;GO:0000981;GO:0000981;GO:0000981;GO:0001228;GO:0001228;GO:0001228;GO:0001501;GO:0001666;GO:0001841;GO:0002328;GO:0003183;GO:0003211;GO:0003215;GO:0003289;GO:0003357;GO:0003677;GO:0003700;GO:0003700;GO:0003700;GO:0005515;GO:0005515;GO:0005634;GO:0005634;GO:0005634;GO:0005654;GO:0005654;GO:0005667;GO:0005737;GO:0005737;GO:0005737;GO:…	K23581	-	K	0B4C2;0E87S;13CWX;0WGUR;KOG0527;1DF6K	SRY (sex determining region Y)-box 4 [Source:MGI Symbol;Acc:MGI:98366]	20677	Q06831
ENSMUSG00000029552	1583.98	542.492	2625.48	4.83966	2.27491	8.18482e-33	2.61704e-31	6	17065148	17105827	+	6835	Tes	GO:0005737;GO:0005925;GO:0008270;GO:0030054;GO:0042127;GO:0046872;GO:0008270;GO:0042127;GO:0005737;GO:0005925;GO:0008270;GO:0030054;GO:0042127;GO:0046872;	K24270	-	Z;T	13BM2;0E7R4;1DER5;1972B;0B3JB;1BARR;0WFYU;0V2TC;0INGJ	testin LIM domain protein [Source:MGI Symbol;Acc:MGI:105081]	21753	Q921W7
ENSMUSG00000018931	698.838	1198.14	199.537	0.166539	-2.58607	1.15832e-32	3.69577e-31	11	60793072	60805576	-	4247	Natd1	GO:0005575;	K06975	-	S	1B5ZF;0VJGC;1D4E2;0UVPN;0IZHM;13SRI;0A7U9;0DUID;193N3	N-acetyltransferase domain containing 1 [Source:MGI Symbol;Acc:MGI:1344388]	24083	Q9DBW3
ENSMUSG00000035929	1572.6	120.318	3024.88	25.1407	4.65195	1.18143e-32	3.76149e-31	17	35598593	35604266	+	2596	H2-Q4	GO:0002476;GO:0005102;GO:0005615;GO:0005783;GO:0005794;GO:0005797;GO:0005886;GO:0009897;GO:0009986;GO:0016020;GO:0016021;GO:0030881;GO:0042277;GO:0042605;GO:0042608;GO:0042610;GO:0042612;GO:0042824;GO:0044877;GO:0046977;GO:0062061;GO:0070971;	K06751	-	U	09WNN;0US52;0VB3S;1CU56;0II5V;194CQ;13KER;0DJCZ;1AX68	histocompatibility 2, Q region locus 4 [Source:MGI Symbol;Acc:MGI:95933]	15015	Q8HWB2;Q0WXH7
ENSMUSG00000003546	904.414	1642.84	165.988	0.101037	-3.30704	1.21268e-32	3.85276e-31	17	46941550	46956948	-	2377	Klc4	GO:0003674;GO:0005575;GO:0005737;GO:0005856;GO:0005871;GO:0005874;GO:0008150;GO:0003674;GO:0005575;GO:0005737;GO:0005856;GO:0005871;GO:0005874;GO:0008150;	K10407	-	Z	12QDB;0DHEK;0UFGF;0V6JC;KOG1840;1AVWV;1CS4M;18WV2;09W3V	kinesin light chain 4 [Source:MGI Symbol;Acc:MGI:1922014]	74764	Q9DBS5
ENSMUSG00000042249	1582.97	502.122	2663.81	5.3051	2.40738	1.2706e-32	4.02822e-31	5	113058348	113163657	-	8693	Grk3	GO:0000166;GO:0001934;GO:0002029;GO:0004672;GO:0004674;GO:0004674;GO:0004703;GO:0004703;GO:0005524;GO:0005524;GO:0005634;GO:0005829;GO:0005929;GO:0006468;GO:0006468;GO:0006886;GO:0007165;GO:0016020;GO:0016301;GO:0016310;GO:0016740;GO:0030018;GO:0030424;GO:0031623;GO:0031623;GO:0031748;GO:0043197;GO:0043198;GO:0043647;GO:0044292;GO:0045121;GO:0045202;GO:0046154;GO:0047696;GO:0047696;GO:0048471;GO:…	K00910	EC:2.7.11.15	T	KOG0986;0V6H7;1951N;0DIA5;1AVWX;1CT0M;09WZT;0UKE6;12Q7S	G protein-coupled receptor kinase 3 [Source:MGI Symbol;Acc:MGI:87941]	320129	Q3UYH7;Q8BVT9
ENSMUSG00000042444	972.351	1640.45	304.254	0.18547	-2.43074	1.32425e-32	4.18945e-31	9	70506296	70564456	-	8600	Mindy2	GO:0004843;GO:0004843;GO:0005654;GO:0005654;GO:0005829;GO:0006508;GO:0008233;GO:0008234;GO:0016787;GO:0016807;GO:0016807;GO:0016807;GO:0018215;GO:0036435;GO:0036435;GO:0036435;GO:0070530;GO:0070530;GO:0070530;GO:0071108;GO:0071795;GO:0071795;GO:0071795;GO:0071796;GO:0071796;GO:0071796;GO:0071944;GO:1990380;GO:1990380;GO:1990380;GO:1990380;GO:0004843;GO:0004843;GO:0018215;GO:0036435;GO:0071108;GO:…	K01309	EC:3.4.19.12	S;T;P;I;U	09U3P;18YCW;0DFDD;1AT9Y;13HJT;0V52T;KOG2427;0UMZN;1CQ35	MINDY lysine 48 deubiquitinase 2 [Source:MGI Symbol;Acc:MGI:2443086]	235461	Q6PDI6
ENSMUSG00000020205	88.1164	1.88918	174.344	92.2854	6.52803	1.43667e-32	4.53551e-31	10	111342147	111344506	+	2205	Phlda1	GO:0005515;GO:0005634;GO:0005634;GO:0005654;GO:0005654;GO:0005730;GO:0005730;GO:0005730;GO:0005737;GO:0006915;GO:0031410;GO:0043065;GO:0043065;GO:0043065;GO:0045210;GO:1901981;	K23793	-	W;T;K	0DPZN;1CUM0;1AVA8;0UKP9;13RAY;190R1;0A2BR;0VBRH;0IXHQ	pleckstrin homology like domain, family A, member 1 [Source:MGI Symbol;Acc:MGI:1096880]	21664	Q62392
ENSMUSG00000015944	473.487	830.403	116.57	0.140378	-2.83261	1.5088e-32	4.75319e-31	5	134128550	134173182	+	7560	Castor2	GO:0005737;GO:0005829;GO:0005829;GO:0005829;GO:0042802;GO:0061700;GO:0061700;GO:0061700;GO:1902531;GO:1903577;GO:1904262;GO:1904262;GO:1904262;	K23081	-	S	0UN4S;0DMR2;18YKJ;1CVBJ;1ATRP;09ZWC;13KIU;0V7TY;0IJ9B	cytosolic arginine sensor for mTORC1 subunit 2 [Source:MGI Symbol;Acc:MGI:1933384]	80909	Q8CAB8
ENSMUSG00000006418	3463.17	1033.52	5892.81	5.70168	2.51139	1.71148e-32	5.38038e-31	2	167334565	167358093	+	3356	Rnf114	GO:0000209;GO:0005634;GO:0005737;GO:0005829;GO:0005829;GO:0005886;GO:0005886;GO:0006511;GO:0007275;GO:0007283;GO:0016567;GO:0016740;GO:0030154;GO:0046872;GO:0061630;GO:0000209;GO:0005634;GO:0005737;GO:0005829;GO:0005886;GO:0006511;GO:0007275;GO:0007283;GO:0016567;GO:0016740;GO:0030154;GO:0046872;GO:0061630;GO:0046872;	K15697	EC:2.3.2.27	O	0A078;0VB37;1CWP2;1B2YC;18YYH;12SKZ;0UFFX;0DMTR;0IEG7	ring finger protein 114 [Source:MGI Symbol;Acc:MGI:1933159]	81018	Q9ET26
ENSMUSG00000026786	4415.2	1650.58	7179.82	4.34987	2.12097	1.75321e-32	5.49999e-31	2	22664106	22765665	+	7414	Apbb1ip	GO:0002291;GO:0005515;GO:0005515;GO:0005737;GO:0005829;GO:0005829;GO:0005829;GO:0005856;GO:0005886;GO:0005886;GO:0005886;GO:0005886;GO:0005925;GO:0007165;GO:0016020;GO:0030027;GO:0030054;GO:0042101;GO:0042995;GO:0045785;	K17704	-	Z;T	09UFY;0V5FB;0DFRP;1B3EM;1CQF9;KOG3751;12P97;18VS6;0UH70	amyloid beta (A4) precursor protein-binding, family B, member 1 interacting protein [Source:MGI Symbol;Acc:MGI:1861354]	54519	Q8R5A3;B1AYC9
ENSMUSG00000040428	222.513	35.5974	409.429	11.5016	3.52377	2.17896e-32	6.82133e-31	7	45175754	45203653	+	6371	Plekha4	GO:0005546;GO:0031234;GO:0032266;GO:0043325;GO:0080025;GO:0090263;GO:2000096;	K23797	-	Z;T	1CVAU;0V9YX;18WEH;0UPEX;12RKJ;09Z1D;0DKGX;1ATK8;0IFZ8	pleckstrin homology domain containing, family A (phosphoinositide binding specific) member 4 [Source:MGI Symbol;Acc:MGI:1916467]	69217	-
ENSMUSG00000054203	3159.87	4.88566	6314.85	1292.53	10.336	2.40142e-32	7.50205e-31	1	173839564	173859376	-	4177	Ifi205	GO:0000122;GO:0000978;GO:0001227;GO:0002218;GO:0002218;GO:0003690;GO:0003690;GO:0005634;GO:0005634;GO:0005654;GO:0005730;GO:0005730;GO:0005829;GO:0008134;GO:0009617;GO:0009617;GO:0032731;GO:0035458;GO:0035458;GO:0035458;GO:0042802;	-	-	K	1CTDT;0UM8D;0DINX;0J5NP;194Q0;1B2J8;1408X;0V89T;09XBF	interferon activated gene 205 [Source:MGI Symbol;Acc:MGI:101847]	226695	Q8CGE8
ENSMUSG00000043279	2347.17	843.217	3851.11	4.56717	2.1913	2.60971e-32	8.13577e-31	5	137134498	137145063	-	9281	Trim56	GO:0005737;GO:0008270;GO:0046872;GO:0008270;GO:0046872;	K12026	EC:2.3.2.27	O	0B69D;0ITEJ;0WIZ6;0V3SY;197FE;0E9EC;1BBG0;1DG9N;13FX6	tripartite motif-containing 56 [Source:MGI Symbol;Acc:MGI:2685298]	384309	Q80VI1;A0A0R4J0Q6
ENSMUSG00000015316	571.061	0.358181	1141.76	3187.68	11.6383	3.02231e-32	9.40247e-31	1	171594695	171628752	+	6156	Slamf1	GO:0001779;GO:0001787;GO:0002232;GO:0002250;GO:0002277;GO:0002376;GO:0002725;GO:0005515;GO:0005515;GO:0005886;GO:0006909;GO:0007155;GO:0009897;GO:0009986;GO:0009986;GO:0010759;GO:0016020;GO:0016021;GO:0016021;GO:0031338;GO:0032689;GO:0032695;GO:0032715;GO:0032720;GO:0032729;GO:0035744;GO:0038023;GO:0038023;GO:0042104;GO:0042169;GO:0042802;GO:0045087;GO:0045335;GO:0046330;GO:0046649;GO:0050790;GO:…	K06536	-	T	0UUF2;0A4QE;13MVR;1AUYF;18W0I;0DS6N;0VFJG;1D1FR;0IFKK	signaling lymphocytic activation molecule family member 1 [Source:MGI Symbol;Acc:MGI:1351314]	27218	Q9QUM4;Q544K1
ENSMUSG00000060477	4896.46	1437.97	8354.95	5.81026	2.5386	3.16601e-32	9.8291e-31	6	113615428	113671987	+	4412	Irak2	GO:0000166;GO:0001959;GO:0001959;GO:0001959;GO:0002755;GO:0004672;GO:0004672;GO:0005515;GO:0005524;GO:0005524;GO:0005634;GO:0005737;GO:0005886;GO:0006468;GO:0006954;GO:0007165;GO:0007249;GO:0019221;GO:0031663;GO:0032088;GO:0032088;GO:0035556;GO:0042803;GO:0042803;GO:0042981;GO:0043433;GO:0046982;GO:0046982;GO:0051092;GO:0051092;GO:0051092;GO:0070498;GO:0070498;GO:0070498;GO:0070498;GO:0070555;GO:…	K04731	EC:2.7.11.1	T	0VCW6;KOG1187;1B38V;1CYMY;18TZG;0DPNZ;0A211;0UT05;13JWZ	interleukin-1 receptor-associated kinase 2 [Source:MGI Symbol;Acc:MGI:2429603]	108960	Q8CFA1
ENSMUSG00000041135	3289.1	208.216	6369.97	30.5931	4.93513	3.50688e-32	1.08648e-30	4	16122733	16163647	-	2816	Ripk2	GO:0000166;GO:0001961;GO:0002250;GO:0002250;GO:0002376;GO:0002827;GO:0004672;GO:0004672;GO:0004674;GO:0004674;GO:0004706;GO:0004715;GO:0005102;GO:0005102;GO:0005524;GO:0005524;GO:0005737;GO:0005737;GO:0005737;GO:0005737;GO:0005829;GO:0005829;GO:0005829;GO:0005856;GO:0005856;GO:0005856;GO:0006468;GO:0006915;GO:0007249;GO:0007256;GO:0007257;GO:0010800;GO:0010800;GO:0010800;GO:0010942;GO:0010942;GO:…	K08846	EC:2.7.11.1	T	1CQA5;1AU4G;13IJ2;0UIKS;09VGK;KOG0192;18T41;0DFKG;0V6FS	receptor (TNFRSF)-interacting serine-threonine kinase 2 [Source:MGI Symbol;Acc:MGI:1891456]	192656	P58801;Q547H1
ENSMUSG00000024927	3663.85	1366.25	5961.46	4.36337	2.12544	3.63546e-32	1.12399e-30	19	5687511	5698158	+	3072	Rela	GO:0000122;GO:0000122;GO:0000122;GO:0000785;GO:0000785;GO:0000785;GO:0000785;GO:0000785;GO:0000976;GO:0000976;GO:0000977;GO:0000977;GO:0000978;GO:0000978;GO:0000978;GO:0000978;GO:0000978;GO:0000979;GO:0000979;GO:0000981;GO:0000981;GO:0000981;GO:0000981;GO:0001225;GO:0001225;GO:0001227;GO:0001227;GO:0001227;GO:0001228;GO:0001228;GO:0001228;GO:0001889;GO:0001942;GO:0003677;GO:0003677;GO:0003677;GO:…	K04735	-	K	0IG8F;1CPFA;18YPB;09TEG;13E12;1AXQX;0DERH;0V4DN;0UFH7	v-rel reticuloendotheliosis viral oncogene homolog A (avian) [Source:MGI Symbol;Acc:MGI:103290]	19697	Q04207;Q548Y4
ENSMUSG00000035158	4060.15	1524.3	6596	4.32724	2.11345	3.66448e-32	1.13062e-30	6	97784013	97998310	+	6196	Mitf	GO:0003700;GO:0005634;GO:0005634;GO:0006355;GO:0006357;GO:0046983;GO:0000122;GO:0000122;GO:0000978;GO:0000978;GO:0000978;GO:0000978;GO:0000981;GO:0000981;GO:0000981;GO:0001228;GO:0001228;GO:0001228;GO:0003677;GO:0003677;GO:0003682;GO:0003700;GO:0003700;GO:0005515;GO:0005634;GO:0005634;GO:0005634;GO:0005634;GO:0005634;GO:0005737;GO:0005737;GO:0005737;GO:0006351;GO:0006351;GO:0006355;GO:0006355;GO:…	K09455	-	K	12SEP;0V8E6;18WUG;0UHJ8;1CQ2G;09XG5;KOG1318;0DFCS;1AT5Z	melanogenesis associated transcription factor [Source:MGI Symbol;Acc:MGI:104554]	17342	Q08874
ENSMUSG00000030830	20288.5	4814.12	35763	7.42877	2.89312	3.92868e-32	1.20964e-30	7	126895432	126934310	+	6569	Itgal	GO:0007155;GO:0007155;GO:0007229;GO:0008305;GO:0016020;GO:0016021;GO:0046872;GO:0007155;GO:0007155;GO:0007229;GO:0008305;GO:0016020;GO:0016021;GO:0046872;GO:0002291;GO:0007155;GO:0007155;GO:0007157;GO:0007159;GO:0007160;GO:0007229;GO:0008305;GO:0009986;GO:0009986;GO:0016020;GO:0016021;GO:0030369;GO:0034687;GO:0035683;GO:0043113;GO:0044877;GO:0046872;GO:0050839;GO:0098609;GO:0001772;GO:0002291;GO:…	K05718	-	W	1DEZ3;0WGD6;0E7ZM;0B3Y5;0IPAP;13CAF	integrin alpha L [Source:MGI Symbol;Acc:MGI:96606]	16408	E9Q5M7
ENSMUSG00000026923	2873.42	1054.34	4692.5	4.45065	2.15402	4.02603e-32	1.23707e-30	2	26347915	26406675	-	14232	Notch1	GO:0000122;GO:0000122;GO:0000122;GO:0000122;GO:0000139;GO:0001525;GO:0001669;GO:0001669;GO:0001701;GO:0001708;GO:0001726;GO:0001837;GO:0001837;GO:0001889;GO:0001947;GO:0002040;GO:0002051;GO:0002052;GO:0002052;GO:0002193;GO:0002193;GO:0002437;GO:0003151;GO:0003151;GO:0003157;GO:0003160;GO:0003162;GO:0003169;GO:0003180;GO:0003180;GO:0003180;GO:0003181;GO:0003182;GO:0003184;GO:0003184;GO:0003184;GO:…	K02599	-	T;K	197AB;1BB5B;0B4ZZ;0WHJN;0E8ME;1DFJ6;0V3C1;0IR7G;13DX8	notch 1 [Source:MGI Symbol;Acc:MGI:97363]	18128	Q01705
ENSMUSG00000039497	5422.36	1794.18	9050.55	5.04438	2.33468	4.09816e-32	1.25666e-30	10	34027389	34083711	-	4980	Dse	GO:0005654;GO:0005783;GO:0005794;GO:0005829;GO:0015012;GO:0016020;GO:0016021;GO:0016853;GO:0030204;GO:0030205;GO:0030206;GO:0030208;GO:0047757;GO:0047757;GO:0047757;GO:0016853;GO:0016853;	K01794	EC:5.1.3.19	G	12NM9;0V585;18XCS;1B2K8;0IKEY;0DFIR;0UGWR;1CQ8H;09U90	dermatan sulfate epimerase [Source:MGI Symbol;Acc:MGI:2443455]	212898	Q8BLI4
ENSMUSG00000028403	1551.91	539.432	2564.38	4.75386	2.2491	4.4959e-32	1.3758e-30	4	82716975	82778195	-	12972	Zdhhc21	GO:0000139;GO:0001942;GO:0003056;GO:0005783;GO:0005794;GO:0005794;GO:0005794;GO:0005794;GO:0005886;GO:0005886;GO:0005886;GO:0006612;GO:0016020;GO:0016021;GO:0016409;GO:0016409;GO:0016409;GO:0016740;GO:0016746;GO:0018215;GO:0018230;GO:0018230;GO:0018230;GO:0018230;GO:0018345;GO:0018345;GO:0019706;GO:0019706;GO:0048733;GO:0071875;GO:1903140;GO:1904997;GO:0016020;GO:0016021;GO:0016409;GO:0016740;GO:…	K18932	EC:2.3.1.225	S;M	0DKB7;1B2GF;1CV51;0USDA;13IDK;09YVZ;18UR8;0V9TU;KOG1311	zinc finger, DHHC domain containing 21 [Source:MGI Symbol;Acc:MGI:1915518]	68268	Q9D270
ENSMUSG00000027360	557.531	2.18184	1112.88	510.064	8.99453	4.67459e-32	1.42756e-30	2	126435587	126461219	-	6389	Hdc	GO:0001692;GO:0001694;GO:0001694;GO:0001694;GO:0001694;GO:0003824;GO:0004398;GO:0004398;GO:0004398;GO:0004398;GO:0005737;GO:0005829;GO:0006520;GO:0006547;GO:0006548;GO:0006548;GO:0006548;GO:0016597;GO:0016829;GO:0016831;GO:0016831;GO:0016831;GO:0019752;GO:0030170;GO:0030170;GO:0030425;GO:0042423;GO:0042802;GO:0043025;	K01590	EC:4.1.1.22	E	0DMI5;1CWDD;1ATRU;0VAVF;18X4K;0UQQT;KOG0628;09ZYP;12QW1	histidine decarboxylase [Source:MGI Symbol;Acc:MGI:96062]	15186	P23738
ENSMUSG00000020818	1392.94	2312.5	473.382	0.204706	-2.28838	4.69963e-32	1.43229e-30	11	116743266	116766461	+	7076	Mfsd11	GO:0016020;GO:0016021;GO:0016020;GO:0016021;GO:0003674;GO:0005575;GO:0008150;GO:0016020;GO:0016021;GO:0016020;GO:0016021;GO:0016020;GO:0016021;GO:0003674;GO:0005575;GO:0008150;GO:0016020;GO:0016021;	-	-	S;B;U	KOG3098;1B3HE;12N7K;09TFM;18T4F;0DPPG;0UT0D;0V4EQ;1CYND	major facilitator superfamily domain containing 11 [Source:MGI Symbol;Acc:MGI:1917150]	69900	Q8BJ51
ENSMUSG00000034157	2158.29	3969.77	346.803	0.087361	-3.51687	4.77287e-32	1.45165e-30	12	86993817	87012136	+	4863	Cipc	GO:0042754;GO:0045892;GO:0042754;GO:0045892;GO:0042754;GO:0045892;GO:0005515;GO:0005634;GO:0005634;GO:0005654;GO:0005730;GO:0005737;GO:0005829;GO:0005829;GO:0042754;GO:0042754;GO:0045892;GO:0045892;GO:0045892;GO:0048511;GO:0042754;GO:0045892;GO:0042754;GO:0045892;GO:0042754;GO:0045892;GO:0042754;GO:0045892;GO:0042754;GO:0045892;GO:0005515;GO:0005634;GO:0005634;GO:0005737;GO:0005829;GO:0042754;GO:…	-	-	S	13F4H;0URNZ;0ITM7;18TQP;09YRC;1CUZR;0DK5W;0V9P7;1B1N0	CLOCK interacting protein, circadian [Source:MGI Symbol;Acc:MGI:1919185]	217732	Q8R0W1;Z4YJJ0
ENSMUSG00000029178	2310.08	786.723	3833.43	4.87266	2.28471	4.80191e-32	1.45752e-30	5	64960731	64990244	+	11243	Klf3	GO:0000122;GO:0000785;GO:0000977;GO:0000978;GO:0000981;GO:0001227;GO:0003677;GO:0003677;GO:0005634;GO:0005654;GO:0005654;GO:0006357;GO:0046872;GO:1901653;GO:1990837;GO:1990837;GO:0000122;GO:0000785;GO:0000977;GO:0000978;GO:0000981;GO:0001227;GO:0003677;GO:0003677;GO:0005634;GO:0005654;GO:0006357;GO:0046872;GO:1990837;	K15605	-	K	0UQRQ;0DQFZ;13IJW;1B38N;1CZI1;0VDPG;18VXW;KOG1721;0A2TU	Kruppel-like factor 3 (basic) [Source:MGI Symbol;Acc:MGI:1342773]	16599	Q60980;Q545J5
ENSMUSG00000015501	960.658	307.95	1613.37	5.23906	2.38931	4.86261e-32	1.47219e-30	10	13841819	14027118	+	13720	Hivep2	GO:0000978;GO:0000978;GO:0000981;GO:0001228;GO:0003677;GO:0003700;GO:0005634;GO:0005634;GO:0005654;GO:0005667;GO:0006351;GO:0006357;GO:0007165;GO:0045944;GO:0046872;GO:0046872;GO:0000978;GO:0000978;GO:0000981;GO:0001228;GO:0003677;GO:0003700;GO:0005634;GO:0005634;GO:0005654;GO:0005667;GO:0006351;GO:0006357;GO:0007165;GO:0045944;GO:0046872;GO:0046872;GO:0000978;GO:0000978;GO:0000981;GO:0001228;GO:…	K09239	-	K	0DKFH;18TZ5;0VB2F;0A06G;1AW61;12SK9;KOG1721;0UI6S;1CWN4	human immunodeficiency virus type I enhancer binding protein 2 [Source:MGI Symbol;Acc:MGI:1338076]	15273	Q3UHF7
ENSMUSG00000017715	2070.7	740.105	3401.29	4.59569	2.20028	4.8699e-32	1.47219e-30	11	117877118	117914837	+	5333	Pgs1	GO:0000166;GO:0003824;GO:0005524;GO:0005739;GO:0005739;GO:0005739;GO:0005739;GO:0005783;GO:0005783;GO:0006629;GO:0006655;GO:0006655;GO:0008444;GO:0008444;GO:0008444;GO:0008444;GO:0008654;GO:0008654;GO:0016740;GO:0032049;GO:0032049;GO:0032049;GO:0046339;GO:0000166;GO:0003824;GO:0005524;GO:0005739;GO:0006629;GO:0006655;GO:0008444;GO:0008444;GO:0008654;GO:0016740;GO:0032049;GO:0000166;GO:0003824;GO:…	K00995	EC:2.7.8.5	H;I	0UJ1T;0V9SV;1B04F;0DNYD;09YV1;1CXVV;18W9N;KOG3964;12NB4	phosphatidylglycerophosphate synthase 1 [Source:MGI Symbol;Acc:MGI:1921701]	74451	Q8BHF7;B9EKS7
ENSMUSG00000078920	5969.47	71.2319	11867.7	166.607	7.3803	5.15496e-32	1.55522e-30	11	48967414	48987801	+	2473	Ifi47	GO:0003924;GO:0005525;GO:0005783;GO:0005789;GO:0006952;GO:0006952;GO:0016020;GO:0035458;GO:0003924;GO:0005783;GO:0005789;GO:0006952;GO:0006952;GO:0035458;GO:0003924;GO:0005525;GO:0005783;GO:0005789;GO:0006952;GO:0006952;GO:0016020;GO:0035458;GO:0003924;GO:0005525;GO:0005783;GO:0005789;GO:0006952;GO:0006952;GO:0016020;GO:0035458;GO:0003924;GO:0005525;GO:0005783;GO:0005789;GO:0006952;GO:0006952;GO:…	K17072	-	S	0VBXP;13J01;0DQAB;0USXH;0A2NU;1CZCD;0IJSM;195JF;1B4YY	interferon gamma inducible protein 47 [Source:MGI Symbol;Acc:MGI:99448]	15953	Q61635
ENSMUSG00000019122	9280.25	676.569	17883.9	26.4333	4.72428	5.48041e-32	1.65008e-30	11	83463745	83469462	-	3045	Ccl9	GO:0002548;GO:0005125;GO:0005576;GO:0005576;GO:0005615;GO:0005615;GO:0006935;GO:0006954;GO:0006955;GO:0007165;GO:0007186;GO:0008009;GO:0008009;GO:0030593;GO:0043547;GO:0045662;GO:0048020;GO:0048247;GO:0060326;GO:0070098;GO:0070374;GO:0071346;GO:0071347;GO:0071356;	K22671	-	S	0UWKV;0VME9;0AABB;196FX;0DW78;0J4DG;1B710;1D5GZ;13Y4A	chemokine (C-C motif) ligand 9 [Source:MGI Symbol;Acc:MGI:104533]	20308	P51670;Q3U9T8
ENSMUSG00000002111	12880.6	5010.53	20750.6	4.14139	2.05012	5.49595e-32	1.65143e-30	2	90912735	90946101	+	2695	Spi1	GO:0000122;GO:0000785;GO:0000785;GO:0000785;GO:0000978;GO:0000978;GO:0000978;GO:0000978;GO:0000981;GO:0000981;GO:0000981;GO:0001085;GO:0001227;GO:0001228;GO:0001228;GO:0001944;GO:0002320;GO:0002573;GO:0003677;GO:0003677;GO:0003677;GO:0003700;GO:0003700;GO:0003700;GO:0003700;GO:0003723;GO:0005515;GO:0005515;GO:0005634;GO:0005634;GO:0005634;GO:0005634;GO:0005634;GO:0005634;GO:0005654;GO:0005654;GO:…	K09438	-	K;B	09VH2;0UHQJ;0DGRT;KOG3805;1CRFU;1ATAY;12SKS;0V6GB;1908K	spleen focus forming virus (SFFV) proviral integration oncogene [Source:MGI Symbol;Acc:MGI:98282]	20375	P17433;Q3U5L4
ENSMUSG00000048249	921.126	1552.81	289.444	0.1864	-2.42353	5.55721e-32	1.66649e-30	17	26934624	26995609	+	8564	Crebrf	GO:0000122;GO:0000122;GO:0000977;GO:0000977;GO:0000981;GO:0001228;GO:0003700;GO:0005634;GO:0005634;GO:0005654;GO:0005737;GO:0005737;GO:0006355;GO:0006357;GO:0006986;GO:0006986;GO:0016604;GO:0016604;GO:0032388;GO:0032388;GO:0034976;GO:0034976;GO:0042711;GO:0045732;GO:0045732;GO:0045944;GO:0051222;GO:0051222;GO:1900102;GO:1900102;GO:1900170;GO:1900170;GO:1902213;GO:0006986;GO:0000977;GO:0001228;GO:…	K21554	-	K	0V7AR;09WCB;18WDA;12NQM;0DHMQ;1CSC5;0UJV0;0IHZR;1AVC7	CREB3 regulatory factor [Source:MGI Symbol;Acc:MGI:1924378]	77128	Q8CDG5
ENSMUSG00000030157	850.906	267.076	1434.74	5.37202	2.42547	5.84589e-32	1.74956e-30	6	129157578	129163497	+	1213	Clec2d	GO:0004888;GO:0005515;GO:0005886;GO:0005887;GO:0006968;GO:0009897;GO:0009897;GO:0016020;GO:0016021;GO:0030246;GO:0030246;GO:0042270;GO:0045671;GO:0046703;GO:0046703;	-	-	T;V	0UVA0;0VI61;1B6CS;0DU77;KOG4297;0A77D;13YB3;1D3EM	C-type lectin domain family 2, member d [Source:MGI Symbol;Acc:MGI:2135589]	93694	Q91V08;F5BFH0
ENSMUSG00000022106	2658.9	4456.51	861.286	0.193265	-2.37135	6.13673e-32	1.83294e-30	14	73360477	73445283	+	9489	Rcbtb2	GO:0001669;GO:0001669;GO:0003674;GO:0008150;GO:0031410;GO:0001669;GO:0001669;GO:0003674;GO:0008150;GO:0031410;GO:0001669;GO:0001669;GO:0003674;GO:0008150;GO:0031410;GO:0001669;GO:0001669;GO:0003674;GO:0008150;GO:0031410;GO:0001669;GO:0001669;GO:0003674;GO:0008150;GO:0031410;GO:0001669;GO:0001669;GO:0003674;GO:0008150;GO:0031410;	K11494	-	Z;H;D	KOG1426;1AW0R;18WYQ;09UC7;0UP6C;12SBC;0DFMT;1CQBF;0V5BC	regulator of chromosome condensation (RCC1) and BTB (POZ) domain containing protein 2 [Source:MGI Symbol;Acc:MGI:1917200]	105670	Q99LJ7
ENSMUSG00000004044	763.397	232.313	1294.48	5.57216	2.47824	6.44305e-32	1.9206e-30	11	100847559	100861713	-	3587	Cavin1	GO:0003723;GO:0005515;GO:0005634;GO:0005634;GO:0005634;GO:0005737;GO:0005737;GO:0005737;GO:0005737;GO:0005739;GO:0005739;GO:0005739;GO:0005783;GO:0005829;GO:0005886;GO:0005886;GO:0005886;GO:0005901;GO:0005901;GO:0005901;GO:0005901;GO:0005901;GO:0006353;GO:0006361;GO:0006361;GO:0006361;GO:0006361;GO:0006363;GO:0006363;GO:0006363;GO:0006363;GO:0006363;GO:0009303;GO:0009306;GO:0016020;GO:0019843;GO:…	K19387	-	K	12TA2;0V8X6;1ASEW;1CU4N;0IV8W;09XZF;0DJCE;195QU;0UKMA	caveolae associated 1 [Source:MGI Symbol;Acc:MGI:1277968]	19285	O54724
ENSMUSG00000028459	6006.91	1128.28	10885.5	9.64792	3.27022	6.61672e-32	1.96844e-30	4	43446462	43454628	-	3422	Cd72	GO:0004888;GO:0005887;GO:0004888;GO:0005887;GO:0005887;GO:0005887;GO:0016020;GO:0016021;GO:0030246;GO:0004888;GO:0005887;GO:0016020;GO:0016021;GO:0004888;GO:0005887;GO:0005887;GO:0016020;GO:0016021;GO:0004888;GO:0005887;GO:0016020;GO:0016021;	K06504	-	T;V	13EM9;0V3FS;1DFRG;0B5DI;0WI0R;197BF;0E8UT;1BB83;0IS25	CD72 antigen [Source:MGI Symbol;Acc:MGI:88345]	12517	P21855
ENSMUSG00000029798	2597.16	131.614	5062.7	38.4664	5.26553	7.46516e-32	2.21644e-30	6	57557985	57641617	+	9292	Herc6	GO:0002244;GO:0002376;GO:0004842;GO:0005654;GO:0005737;GO:0005737;GO:0005829;GO:0005829;GO:0009617;GO:0016567;GO:0016740;GO:0045087;GO:0061630;	K22372	EC:2.3.2.-	O	0UGQB;KOG0941;0DFEK;0VCYN;1AXTH;1CQ4C;18TG8;12NRN;09ZJH	hect domain and RLD 6 [Source:MGI Symbol;Acc:MGI:1914388]	67138	F2Z461
ENSMUSG00000044701	6281.02	8.95668	12553.1	1401.53	10.4528	8.13375e-32	2.41017e-30	7	126188182	126194113	-	1021	Il27	GO:0002230;GO:0002376;GO:0005102;GO:0005125;GO:0005515;GO:0005576;GO:0005576;GO:0005615;GO:0005615;GO:0005615;GO:0005829;GO:0006954;GO:0007165;GO:0009617;GO:0032729;GO:0032729;GO:0042129;GO:0042129;GO:0042129;GO:0045087;GO:0045523;GO:0045523;GO:0045523;GO:0045625;GO:0045625;GO:0045625;	K22629	-	O;T	13M44;1CZMY;0URNF;0A55J;1B15I;0IKKP;19347;0DQJE;0VF6E	interleukin 27 [Source:MGI Symbol;Acc:MGI:2384409]	246779	Q8K3I6
ENSMUSG00000032841	661.608	196.11	1127.11	5.74731	2.52289	8.6385e-32	2.55468e-30	2	101544630	101713372	-	4967	Prr5l	GO:0001933;GO:0001933;GO:0001934;GO:0005739;GO:0009968;GO:0010762;GO:0010762;GO:0014068;GO:0031625;GO:0031932;GO:0031932;GO:0031932;GO:0034599;GO:0034599;GO:0038203;GO:0038203;GO:0038203;GO:0061014;GO:0061014;GO:0090316;GO:0090316;GO:0001933;GO:0001933;GO:0001933;GO:0001934;GO:0005739;GO:0009968;GO:0010762;GO:0010762;GO:0010762;GO:0014068;GO:0031625;GO:0031625;GO:0031932;GO:0031932;GO:0031932;GO:…	-	-	S	0UU6S;0IJB2;13HIX;0VFAS;1D17S;18U0S;0A4FX;0DRYW;1AZZM	proline rich 5 like [Source:MGI Symbol;Acc:MGI:1919696]	72446	A2AVJ5
ENSMUSG00000056069	2090.07	3603.25	576.893	0.160103	-2.64293	8.93478e-32	2.63708e-30	15	27655155	27681665	-	3241	Otulinl	GO:0005737;GO:0003674;GO:0005634;GO:0005635;GO:0005635;GO:0005635;GO:0005737;GO:0005737;GO:0005737;GO:0005783;GO:0005789;GO:0006508;GO:0008150;GO:0016020;GO:0042406;GO:0042406;GO:0042406;GO:0003674;GO:0005634;GO:0005635;GO:0005635;GO:0005737;GO:0005737;GO:0005783;GO:0005789;GO:0006508;GO:0008150;GO:0016020;GO:0042406;GO:0042406;GO:0005737;	-	-	S	0A1VM;0UQKV;0DPHS;1B0C8;195E4;0VCR7;0IK5W;1CYG9;137V4	OTU deubiquitinase with linear linkage specificity like [Source:MGI Symbol;Acc:MGI:2687281]	223433	Q3TVP5
ENSMUSG00000023066	235.932	435.628	36.2368	0.0831831	-3.58757	8.96849e-32	2.64182e-30	18	88989914	89149140	+	12075	Rttn	GO:0003674;GO:0005737;GO:0005813;GO:0005814;GO:0005856;GO:0005929;GO:0007099;GO:0007275;GO:0007368;GO:0010457;GO:0016021;GO:0032053;GO:0036064;GO:0036064;GO:0036064;GO:0036064;GO:0036064;GO:0042995;GO:0044782;	K16484	-	Z;S	0DJUU;12WT9;1B4TP;0UJG7;0IEI0;0V9U6;09YWF;1CUN1;19575	rotatin [Source:MGI Symbol;Acc:MGI:2179288]	246102	Q8R4Y8
ENSMUSG00000075595	745.117	1267.06	223.177	0.176138	-2.50522	9.35201e-32	2.74938e-30	11	95603499	95725941	+	15444	Zfp652	GO:0000785;GO:0000978;GO:0003677;GO:0003700;GO:0005634;GO:0006357;GO:0046872;GO:0000785;GO:0000978;GO:0003677;GO:0003700;GO:0005634;GO:0006357;GO:0046872;	-	-	K	18UQZ;0V4KE;0DGHT;1CR7H;0UK9W;KOG1721;1AVSA;09V9F;12TBM	zinc finger protein 652 [Source:MGI Symbol;Acc:MGI:2442221]	268469	Q5DU09
ENSMUSG00000020120	30900.7	9261.82	52539.6	5.67271	2.50404	1.0387e-31	3.04766e-30	11	16921206	17002381	-	4486	Plek	GO:0002244;GO:0002576;GO:0005080;GO:0005080;GO:0005737;GO:0005737;GO:0005886;GO:0006904;GO:0007229;GO:0007229;GO:0010572;GO:0010920;GO:0010920;GO:0010925;GO:0010925;GO:0030030;GO:0030030;GO:0030836;GO:0030836;GO:0030836;GO:0030845;GO:0030845;GO:0030866;GO:0030866;GO:0031529;GO:0031529;GO:0031532;GO:0031532;GO:0031532;GO:0032233;GO:0032233;GO:0032587;GO:0032587;GO:0033625;GO:0035556;GO:0042803;GO:…	K19993	-	T	0IFJ7;09XEV;13HUJ;1CTS2;1AS31;18SWX;0V8KH;0DJ0K;0UG9Y	pleckstrin [Source:MGI Symbol;Acc:MGI:1860485]	56193	Q9JHK5;Q5F271
ENSMUSG00000025993	4791.99	7747.44	1836.55	0.237052	-2.07672	1.05861e-31	3.09999e-30	1	45947228	45965683	-	9000	Slc40a1	GO:0002260;GO:0003158;GO:0005381;GO:0005381;GO:0005381;GO:0005381;GO:0005515;GO:0005515;GO:0005654;GO:0005829;GO:0005886;GO:0005886;GO:0006811;GO:0006826;GO:0006879;GO:0008021;GO:0015093;GO:0016020;GO:0016021;GO:0016021;GO:0016323;GO:0016323;GO:0016323;GO:0017046;GO:0017046;GO:0017046;GO:0034395;GO:0034755;GO:0034755;GO:0034755;GO:0042802;GO:0043066;GO:0045944;GO:0048536;GO:0055072;GO:0055072;GO:…	K14685	-	P	0UPST;0DGIK;12RU2;1CVKR;18TDK;09Z9U;0VA70;1ASSS;KOG2601	solute carrier family 40 (iron-regulated transporter), member 1 [Source:MGI Symbol;Acc:MGI:1315204]	53945	Q9JHI9
ENSMUSG00000048142	148.739	286.297	11.1812	0.0390545	-4.67837	1.07282e-31	3.13548e-30	5	34153328	34163260	+	6670	Nat8l	GO:0005737;GO:0005739;GO:0008080;GO:0016020;GO:0016021;GO:0017188;GO:0017188;GO:0031966;GO:0031966;	K18309	EC:2.3.1.17	S;M	0V3I7;1BB9Q;13EVS;0E8ZC;0IS8M;1DFVN;0B5K6;0WI7T	N-acetyltransferase 8-like [Source:MGI Symbol;Acc:MGI:2447776]	269642	Q3UGX3;A0A0R4J0R4
ENSMUSG00000042228	10572.8	2826.08	18319.6	6.48234	2.69651	1.17866e-31	3.43811e-30	4	3678115	3813122	+	4073	Lyn	GO:0000166;GO:0001782;GO:0001817;GO:0001933;GO:0001934;GO:0001934;GO:0002250;GO:0002376;GO:0002431;GO:0002431;GO:0002513;GO:0002513;GO:0002553;GO:0002553;GO:0002576;GO:0002576;GO:0002762;GO:0002768;GO:0002774;GO:0002902;GO:0002902;GO:0004672;GO:0004672;GO:0004713;GO:0004713;GO:0004713;GO:0004713;GO:0004713;GO:0004713;GO:0004715;GO:0004715;GO:0005102;GO:0005102;GO:0005102;GO:0005128;GO:0005161;GO:…	K05854	EC:2.7.10.2	T	0UNKM;195ZK;KOG0197;0DJSM;1AWSY;09YCT;12R3M;1CUJR;0V5FJ	LYN proto-oncogene, Src family tyrosine kinase [Source:MGI Symbol;Acc:MGI:96892]	17096	P25911;Q3TCS3;Q8CEI0
ENSMUSG00000042726	7306.8	1887.41	12726.2	6.74267	2.75332	1.34732e-31	3.92242e-30	5	121509788	121523695	-	4486	Trafd1	GO:0005515;GO:0005515;GO:0008270;GO:0045824;GO:0046872;GO:0005515;GO:0005515;GO:0008270;GO:0045824;GO:0046872;GO:0008270;GO:0046872;	-	-	S;T	0DHHZ;12S7U;18XZG;0V6K8;0UJQC;0IGBJ;1AV75;1CS87;09XFH	TRAF type zinc finger domain containing 1 [Source:MGI Symbol;Acc:MGI:1923551]	231712	Q3UDK1
ENSMUSG00000023030	3385.73	1275.14	5496.32	4.31036	2.10781	1.38823e-31	4.02752e-30	15	100285779	100322953	-	6354	Slc11a2	GO:0000041;GO:0001666;GO:0005375;GO:0005375;GO:0005381;GO:0005381;GO:0005384;GO:0005384;GO:0005384;GO:0005506;GO:0005507;GO:0005634;GO:0005634;GO:0005737;GO:0005737;GO:0005739;GO:0005739;GO:0005739;GO:0005741;GO:0005764;GO:0005765;GO:0005765;GO:0005765;GO:0005768;GO:0005768;GO:0005769;GO:0005769;GO:0005769;GO:0005770;GO:0005773;GO:0005773;GO:0005802;GO:0005886;GO:0005886;GO:0005886;GO:0005886;GO:…	K21398	-	P	KOG1291;0UJ4A;1AVZP;18SBU;09VEF;0DGP9;1CRD3;0V6DM;12RF6	solute carrier family 11 (proton-coupled divalent metal ion transporters), member 2 [Source:MGI Symbol;Acc:MGI:1345279]	18174	P49282
ENSMUSG00000004530	4310.14	6973.44	1646.84	0.236158	-2.08217	1.3888e-31	4.02752e-30	5	113980497	114046819	-	9664	Coro1c	GO:0015629;GO:0030036;GO:0051015;GO:0000147;GO:0001755;GO:0001755;GO:0001755;GO:0001932;GO:0001932;GO:0001933;GO:0001933;GO:0003779;GO:0005737;GO:0005768;GO:0005856;GO:0005856;GO:0005886;GO:0005938;GO:0006909;GO:0007015;GO:0010008;GO:0010008;GO:0010008;GO:0010632;GO:0010632;GO:0010633;GO:0010633;GO:0010762;GO:0015629;GO:0015629;GO:0015629;GO:0016020;GO:0016197;GO:0016197;GO:0016197;GO:0016328;GO:…	K13886	-	Z	12NEF;18UCI;0V4FS;09TGS;1CQGI;KOG0303;1B0YQ;0UKMS;0DFT4	coronin, actin binding protein 1C [Source:MGI Symbol;Acc:MGI:1345964]	23790	Q9WUM4
ENSMUSG00000048621	2356.04	28.2722	4683.82	165.669	7.37216	1.41464e-31	4.09453e-30	X	108240362	108244045	+	2795	Gm6377	GO:0003674;GO:0005575;GO:0034121;GO:0035751;GO:0003674;GO:0005575;GO:0034121;GO:0035751;	-	-	S	0IVMI;1CZX6;0A365;1AU7J;0DQTI;195VU;13IGV;0UQ4U;0VE12	predicted gene 6377 [Source:MGI Symbol;Acc:MGI:3647255]	622976	Q8BHV4
ENSMUSG00000042500	429.181	754.327	104.034	0.137917	-2.85813	1.49036e-31	4.30536e-30	4	126383334	126427265	-	6947	Ago4	GO:0000932;GO:0000932;GO:0003676;GO:0003723;GO:0003723;GO:0003725;GO:0003725;GO:0003727;GO:0003727;GO:0005634;GO:0005737;GO:0005737;GO:0005737;GO:0005829;GO:0006402;GO:0006402;GO:0006402;GO:0006417;GO:0007130;GO:0007140;GO:0008584;GO:0010501;GO:0010501;GO:0010586;GO:0016442;GO:0016442;GO:0016442;GO:0022604;GO:0031047;GO:0031054;GO:0031054;GO:0035196;GO:0035196;GO:0035198;GO:0035198;GO:0035198;GO:…	K11593	-	J	0DGFB;18VEZ;KOG1041;0V66Q;1CRPD;1AYGU;09V75;12N2H;0UGEN	argonaute RISC catalytic subunit 4 [Source:MGI Symbol;Acc:MGI:1924100]	76850	Q8CJF8;Q9CS58
ENSMUSG00000029063	6417.6	2479.84	10355.4	4.17581	2.06206	1.52192e-31	4.38806e-30	4	155646835	155675458	+	3747	Nadk	GO:0000166;GO:0003951;GO:0003951;GO:0003951;GO:0003951;GO:0005524;GO:0005829;GO:0006741;GO:0006741;GO:0006741;GO:0016301;GO:0016310;GO:0016740;GO:0019674;GO:0035774;GO:0046872;GO:0000166;GO:0003951;GO:0003951;GO:0003951;GO:0003951;GO:0003951;GO:0005524;GO:0005829;GO:0006741;GO:0006741;GO:0006741;GO:0006741;GO:0016301;GO:0016310;GO:0016740;GO:0019674;GO:0035774;GO:0035774;GO:0046872;GO:0003951;GO:…	K00858	EC:2.7.1.23	H;G	KOG2178;09XYH;0UJRR;1AVFT;1CW2M;0DM7I;12TFF;18TF6;0V8WA	NAD kinase [Source:MGI Symbol;Acc:MGI:2183149]	192185	P58058;Q3UGI1
ENSMUSG00000030657	1649	2956.88	341.124	0.115366	-3.1157	2.05952e-31	5.92665e-30	7	116980214	117272803	+	9651	Xylt1	GO:0000139;GO:0006024;GO:0015012;GO:0016020;GO:0016020;GO:0016021;GO:0016740;GO:0016757;GO:0018215;GO:0030158;GO:0030158;GO:0030166;GO:0046872;	K00771	EC:2.4.2.26	G	12SAD;1CV3P;0VAJ8;1AX4V;KOG0799;18T1G;0DK9Q;09ZNG;0UMND	xylosyltransferase 1 [Source:MGI Symbol;Acc:MGI:2451073]	233781	Q811B1;F8VPK6
ENSMUSG00000024737	19706.5	7831.06	31581.8	4.0329	2.01182	2.10143e-31	6.03565e-30	19	10817091	10836726	+	5491	Slc15a3	GO:0002376;GO:0005764;GO:0005765;GO:0005765;GO:0005765;GO:0005765;GO:0005768;GO:0006857;GO:0010008;GO:0015031;GO:0015293;GO:0015647;GO:0015833;GO:0015835;GO:0016020;GO:0016020;GO:0016021;GO:0022857;GO:0043231;GO:0043231;GO:0045087;GO:0055085;GO:0070434;GO:0071916;GO:0071916;GO:0071916;GO:0140206;GO:0140206;GO:0140206;	K14638	-	P;E	0DJYU;1AZVC;09XYR;18YTV;12QTM;KOG1237;0V5WI;1CUSI;0UG9S	solute carrier family 15, member 3 [Source:MGI Symbol;Acc:MGI:1929691]	65221	Q8BPX9
ENSMUSG00000017830	2430.96	194.382	4667.54	24.0121	4.58569	2.11391e-31	6.05987e-30	11	100585710	100595097	-	3272	Dhx58	GO:0000166;GO:0002376;GO:0003677;GO:0003723;GO:0003724;GO:0003725;GO:0003725;GO:0003725;GO:0003725;GO:0003727;GO:0003727;GO:0003727;GO:0003727;GO:0004386;GO:0005524;GO:0005524;GO:0005737;GO:0005737;GO:0005737;GO:0008270;GO:0008270;GO:0008270;GO:0008270;GO:0009615;GO:0009615;GO:0009617;GO:0016787;GO:0016787;GO:0032480;GO:0032480;GO:0032480;GO:0032481;GO:0032728;GO:0039534;GO:0039534;GO:0039534;GO:…	K12649	EC:3.6.4.13	A	0V4TZ;18WX5;KOG0354;1CTWW;0DF53;1AT0C;12NQ7;09TUS;0UGAY	DEXH (Asp-Glu-X-His) box polypeptide 58 [Source:MGI Symbol;Acc:MGI:1931560]	80861	Q99J87
ENSMUSG00000034652	3437.72	5565.3	1310.15	0.235413	-2.08673	4.21616e-31	1.20632e-29	11	114780867	114795480	+	4738	Cd300a	GO:0001786;GO:0002376;GO:0002552;GO:0004888;GO:0005515;GO:0005886;GO:0005886;GO:0005886;GO:0006898;GO:0008429;GO:0014063;GO:0016020;GO:0016020;GO:0016021;GO:0019902;GO:0030889;GO:0032516;GO:0033007;GO:0034125;GO:0038023;GO:0043305;GO:0043407;GO:0048147;GO:0050856;GO:0050859;GO:0051134;GO:0060101;GO:1902564;GO:1902567;GO:1902569;GO:2000417;GO:0001786;GO:0002376;GO:0002552;GO:0004888;GO:0005515;GO:…	K06719	-	W;T	0UUCQ;0A6XP;0VHRZ;0DRFK;13SFX;1D0MW;1B51H;0IXT8;1963P	CD300A molecule [Source:MGI Symbol;Acc:MGI:2443411]	217303	Q6SJQ0
ENSMUSG00000033902	3017.72	216.079	5819.37	26.9317	4.75124	4.23013e-31	1.20801e-29	2	119803180	119857889	+	7602	Mapkbp1	GO:0005654;GO:0005730;GO:0005737;GO:0032717;GO:0043124;GO:0097431;GO:1900425;	K21763	-	S;T	0US1S;09Z45;1AZCF;KOG1408;0V89H;0DKWR;1CYST;12SSP;18Z0C	mitogen-activated protein kinase binding protein 1 [Source:MGI Symbol;Acc:MGI:1347004]	26390	Q6NS57;A0A0A0MQA2
ENSMUSG00000038024	2773.81	4502.42	1045.19	0.23214	-2.10693	6.52437e-31	1.85963e-29	4	86666792	86768840	+	8482	Dennd4c	GO:0005085;GO:0005085;GO:0005085;GO:0005085;GO:0005737;GO:0005794;GO:0005794;GO:0005829;GO:0005829;GO:0005829;GO:0005886;GO:0015031;GO:0016020;GO:0030659;GO:0030904;GO:0031410;GO:0031410;GO:0032483;GO:0032593;GO:0032869;GO:0043231;GO:0043231;GO:0050790;GO:0072659;GO:0005085;GO:0050790;GO:0005085;GO:0005085;GO:0005085;GO:0005737;GO:0005794;GO:0005829;GO:0005829;GO:0005886;GO:0015031;GO:0016020;GO:…	K20163	-	T;U	194P6;12NIB;1AW3B;0DI96;09WYM;0UT5B;1CSZN;KOG2127;0V534	DENN/MADD domain containing 4C [Source:MGI Symbol;Acc:MGI:1914769]	329877	A6H8H2
ENSMUSG00000020806	6368.28	1107.17	11629.4	10.5037	3.39282	7.94901e-31	2.26139e-29	11	116488991	116517845	-	5293	Rhbdf2	GO:0005515;GO:0005515;GO:0005783;GO:0005789;GO:0005789;GO:0005886;GO:0006508;GO:0015031;GO:0016020;GO:0016021;GO:0016021;GO:0042058;GO:0050708;GO:0050709;GO:0005515;GO:0005515;GO:0005783;GO:0005789;GO:0005789;GO:0005886;GO:0005886;GO:0006508;GO:0015031;GO:0016020;GO:0016021;GO:0016021;GO:0042058;GO:0050708;GO:0050709;	-	-	T;U	09XQS;12QPF;1AVM6;18YX6;0DJ2S;0V8NH;0UMRY;1CTUG;KOG2290	rhomboid 5 homolog 2 [Source:MGI Symbol;Acc:MGI:2442473]	217344	Q80WQ6
ENSMUSG00000017417	875.301	1484.34	266.265	0.179383	-2.47888	8.00881e-31	2.27114e-29	11	97814064	97877270	-	4836	Plxdc1	GO:0001525;GO:0005515;GO:0005515;GO:0005737;GO:0005886;GO:0005886;GO:0005923;GO:0016020;GO:0016021;GO:0030054;GO:0030425;GO:0043025;GO:0043235;GO:0001525;GO:0005515;GO:0005515;GO:0005737;GO:0005886;GO:0005886;GO:0005923;GO:0016020;GO:0016021;GO:0021510;GO:0030054;GO:0030425;GO:0030425;GO:0043025;GO:0043025;GO:0043235;GO:0043235;GO:0001525;	-	-	W	0V80T;KOG3848;1AVVJ;09X2J;12PD5;1CT3Q;0DIDB;0UKD0;18UKQ	plexin domain containing 1 [Source:MGI Symbol;Acc:MGI:1919574]	72324	Q91ZV7
ENSMUSG00000079339	88.045	1.1073	174.983	158.026	7.30402	8.01363e-31	2.27114e-29	19	34570291	34579356	-	2260	Ifit1bl1	GO:0003723;GO:0003723;GO:0005737;GO:0005737;GO:0005829;GO:0005829;GO:0009615;GO:0050688;GO:0051607;GO:0071357;GO:0071360;GO:0003723;GO:0003723;GO:0005737;GO:0005737;GO:0005829;GO:0005829;GO:0009615;GO:0050688;GO:0051607;GO:0071357;GO:0071360;	K14217	-	S;P	0DNWM;0A0WM;1CXU0;13I8N;1B0KV;0V5W7;KOG1124;1949C;0UM6F	interferon induced protein with tetratricpeptide repeats 1B like 1 [Source:MGI Symbol;Acc:MGI:3650685]	667373	E9PXF7
ENSMUSG00000062190	1270.77	442.927	2098.62	4.73807	2.2443	8.48575e-31	2.40039e-29	6	57679525	57716424	+	3020	Lancl2	GO:0005634;GO:0005634;GO:0005654;GO:0005737;GO:0005829;GO:0005829;GO:0005886;GO:0005886;GO:0005886;GO:0005975;GO:0009789;GO:0010314;GO:0016020;GO:0030864;GO:0032266;GO:0045892;GO:0045892;GO:0070273;GO:0005634;GO:0005634;GO:0005654;GO:0005737;GO:0005829;GO:0005829;GO:0005886;GO:0005886;GO:0005886;GO:0005975;GO:0009789;GO:0010314;GO:0016020;GO:0030864;GO:0032266;GO:0045892;GO:0045892;GO:0070273;GO:…	-	-	V	0DPQQ;0A22S;1D0IV;0UT1S;12PT2;1B0Q9;18TH7;0VCY6;KOG2787	LanC (bacterial lantibiotic synthetase component C)-like 2 [Source:MGI Symbol;Acc:MGI:1919085]	71835	Q9JJK2
ENSMUSG00000021948	14882.5	5952.46	23812.6	4.00047	2.00017	8.68318e-31	2.45161e-29	14	30317311	30348167	-	5544	Prkcd	GO:0000166;GO:0004672;GO:0004672;GO:0004674;GO:0004674;GO:0004674;GO:0004674;GO:0004697;GO:0004697;GO:0004698;GO:0004699;GO:0004715;GO:0005515;GO:0005524;GO:0005524;GO:0005634;GO:0005634;GO:0005737;GO:0005737;GO:0005739;GO:0005739;GO:0005783;GO:0005783;GO:0005829;GO:0005829;GO:0005886;GO:0005886;GO:0005911;GO:0006468;GO:0006468;GO:0006915;GO:0006915;GO:0006979;GO:0007049;GO:0008047;GO:0016020;GO:…	K06068	EC:2.7.11.13	-	-	protein kinase C, delta [Source:MGI Symbol;Acc:MGI:97598]	18753	P28867;Q53YN4
ENSMUSG00000028654	71.6036	0.358181	142.849	398.818	8.63959	8.88103e-31	2.50274e-29	4	122889445	122896278	+	4038	Mycl	GO:0003700;GO:0006355;GO:0000785;GO:0000978;GO:0000981;GO:0003677;GO:0003700;GO:0005515;GO:0005634;GO:0005654;GO:0006355;GO:0006357;GO:0045607;GO:0046983;GO:0000785;GO:0000978;GO:0000981;GO:0003677;GO:0003700;GO:0005515;GO:0005634;GO:0005654;GO:0005654;GO:0005694;GO:0006355;GO:0006357;GO:0045607;GO:0046983;	K09110	-	K	0DKBP;13I0A;1CV5G;0IFII;0UKXG;1B117;0V9U4;09YWD;18SDJ	v-myc avian myelocytomatosis viral oncogene lung carcinoma derived [Source:MGI Symbol;Acc:MGI:96799]	16918	P10166;Q3UIE0
ENSMUSG00000049624	1279.74	2116.99	442.498	0.209022	-2.25827	9.26846e-31	2.60702e-29	9	78443770	78495323	-	3627	Slc17a5	GO:0005764;GO:0005764;GO:0005764;GO:0005764;GO:0005765;GO:0005765;GO:0005765;GO:0005829;GO:0005829;GO:0005886;GO:0005886;GO:0005886;GO:0005887;GO:0006820;GO:0006865;GO:0009617;GO:0015136;GO:0015136;GO:0015136;GO:0015136;GO:0015293;GO:0015739;GO:0015739;GO:0015739;GO:0015739;GO:0016020;GO:0016021;GO:0016021;GO:0022857;GO:0022857;GO:0030054;GO:0030672;GO:0031410;GO:0031410;GO:0045202;GO:0055085;GO:…	K12301	-	P;G	18ZT2;0UFG6;1CP7I;12PZZ;0V45C;0DEHS;KOG2532;09T6K;1ARCV	solute carrier family 17 (anion/sugar transporter), member 5 [Source:MGI Symbol;Acc:MGI:1924105]	235504	Q8BN82
ENSMUSG00000039232	1290.88	125.918	2455.85	19.5036	4.28567	9.5883e-31	2.69192e-29	10	12813953	12840042	-	4209	Stx11	GO:0005484;GO:0005794;GO:0006886;GO:0016020;GO:0016192;GO:0061025;GO:0005484;GO:0005794;GO:0006886;GO:0016020;GO:0016192;GO:0061025;GO:0005794;GO:0016020;GO:0016192;	K08487	-	U	0V6HU;0UT3A;13HDA;1B4JJ;194V1;1CRHC;0DGTA;09VIK;KOG0810	syntaxin 11 [Source:MGI Symbol;Acc:MGI:1921982]	74732	Q9D3G5;Q3U5V8
ENSMUSG00000055447	7309.85	2891.96	11727.7	4.05529	2.01981	1.30119e-30	3.64625e-29	16	49620896	49735373	+	6276	Cd47	GO:0005887;GO:0016020;GO:0016021;GO:0022409;GO:0050729;GO:0050766;GO:0070053;GO:0005887;GO:0016020;GO:0016021;GO:0022409;GO:0050729;GO:0050766;GO:0070053;GO:0005887;GO:0016020;GO:0016021;GO:0022409;GO:0050729;GO:0050766;GO:0070053;GO:0005886;GO:0005887;GO:0016020;GO:0016021;GO:0022409;GO:0050729;GO:0050766;GO:0070053;GO:0005886;GO:0005887;GO:0016020;GO:0016021;GO:0022409;GO:0050729;GO:0050766;GO:…	K06266	-	W;T	1CVN9;0IJTS;0DKTE;0V8YT;191G3;13MME;0UPUW;1B473;09ZB3	CD47 antigen (Rh-related antigen, integrin- associated signal transducer) [Source:MGI Symbol;Acc:MGI:96617]	16423	Q61735
ENSMUSG00000020227	3820.93	354.651	7287.22	20.5476	4.3609	1.48457e-30	4.15235e-29	10	119977553	120038035	-	3676	Irak3	GO:0000166;GO:0000287;GO:0000287;GO:0000287;GO:0001960;GO:0002755;GO:0004672;GO:0004672;GO:0004674;GO:0004674;GO:0004674;GO:0005515;GO:0005524;GO:0005524;GO:0005524;GO:0005524;GO:0005634;GO:0005634;GO:0005634;GO:0005634;GO:0005737;GO:0005737;GO:0005737;GO:0005737;GO:0005886;GO:0006468;GO:0006468;GO:0006468;GO:0006468;GO:0006915;GO:0007165;GO:0009615;GO:0010933;GO:0010936;GO:0016301;GO:0016310;GO:…	K04732	EC:2.7.11.1	T	0UK7C;0VD7I;KOG1187;0DPZK;13IMP;0A2BI;1CYZR;18Y1X;1AVPU	interleukin-1 receptor-associated kinase 3 [Source:MGI Symbol;Acc:MGI:1921164]	73914	Q8K4B2;Q0VB14
ENSMUSG00000038127	6414.03	1953.82	10874.2	5.56563	2.47654	1.53643e-30	4.28938e-29	16	27207619	27270968	+	9164	Ccdc50	GO:0005829;GO:0007605;GO:0031625;GO:0005737;GO:0005737;GO:0007605;GO:0015630;GO:0005737;GO:0007605;GO:0015630;GO:0005737;GO:0005737;GO:0007605;GO:0015630;	-	-	S	1CY0F;0A1F0;1ASJI;0VCAI;0IKBK;13ITI;0DP2H;0UQIG;18VH7	coiled-coil domain containing 50 [Source:MGI Symbol;Acc:MGI:1914751]	67501	Q810U5;A6H6M8
ENSMUSG00000040433	412.611	723.111	102.112	0.141212	-2.82406	1.74523e-30	4.86325e-29	9	96564823	96634884	-	11733	Zbtb38	GO:0000785;GO:0000978;GO:0000981;GO:0003700;GO:0005634;GO:0005634;GO:0005654;GO:0005654;GO:0006275;GO:0006275;GO:0006355;GO:0006974;GO:0006974;GO:0008327;GO:0008327;GO:0042803;GO:0042803;GO:0045892;GO:0045892;GO:0045944;GO:0000785;GO:0000978;GO:0000981;GO:0003700;GO:0005634;GO:0005654;GO:0006275;GO:0006355;GO:0006974;GO:0008327;GO:0042803;GO:0045892;GO:0045944;GO:0000785;GO:0000978;GO:0000981;GO:…	K10510	-	K	1CZ4M;0VA8V;0A2G8;0DQ3K;1ASX8;KOG1721;139QB;0USRN;18Z0F	zinc finger and BTB domain containing 38 [Source:MGI Symbol;Acc:MGI:2442866]	245007	-
ENSMUSG00000025190	1156.36	1916.94	395.769	0.206458	-2.27608	1.81226e-30	5.04063e-29	19	43488191	43513044	-	2539	Got1	GO:0003824;GO:0004069;GO:0004069;GO:0004069;GO:0004069;GO:0004069;GO:0004609;GO:0005654;GO:0005654;GO:0005737;GO:0005737;GO:0005737;GO:0005737;GO:0005764;GO:0005764;GO:0005829;GO:0005829;GO:0005829;GO:0005829;GO:0006103;GO:0006107;GO:0006107;GO:0006114;GO:0006114;GO:0006520;GO:0006531;GO:0006531;GO:0006531;GO:0006532;GO:0006532;GO:0006533;GO:0006533;GO:0006536;GO:0007219;GO:0008483;GO:0008483;GO:…	K14454	EC:2.6.1.1	E	0UNN0;1CWMN;0V497;18XN6;12PGV;1B02D;KOG1411;09TA6;0DMS0	glutamic-oxaloacetic transaminase 1, soluble [Source:MGI Symbol;Acc:MGI:95791]	14718	P05201
ENSMUSG00000021067	1153.25	398.914	1907.59	4.78196	2.2576	2.27423e-30	6.31383e-29	12	70011786	70033776	-	5265	Sav1	GO:0001942;GO:0005515;GO:0005634;GO:0005634;GO:0005634;GO:0005737;GO:0005737;GO:0005737;GO:0005737;GO:0005829;GO:0005829;GO:0005886;GO:0005911;GO:0006915;GO:0007165;GO:0007165;GO:0030159;GO:0030216;GO:0030425;GO:0031697;GO:0035329;GO:0035329;GO:0035329;GO:0042127;GO:0042802;GO:0042802;GO:0043065;GO:0043113;GO:0045600;GO:0046332;GO:0046620;GO:0050680;GO:0050821;GO:0051091;GO:0060044;GO:0060090;GO:…	K16686	-	S;T;E	12Q6S;0DHX1;0UK85;09TGV;1CSMR;1B0QC;18S04;0V7K4;KOG1891	salvador family WW domain containing 1 [Source:MGI Symbol;Acc:MGI:1927144]	64010	Q8VEB2
ENSMUSG00000032690	4726.65	966.647	8486.65	8.77947	3.13413	2.29897e-30	6.3707e-29	5	120868398	120887918	-	4451	Oas2	GO:0000166;GO:0001730;GO:0001730;GO:0001730;GO:0001730;GO:0002376;GO:0003723;GO:0003725;GO:0003725;GO:0003725;GO:0005524;GO:0005524;GO:0005654;GO:0005737;GO:0005737;GO:0005829;GO:0006401;GO:0009615;GO:0009617;GO:0016020;GO:0016740;GO:0016779;GO:0016779;GO:0045071;GO:0045087;GO:0046872;GO:0048471;GO:0048471;GO:0051607;GO:0051607;GO:0051607;GO:0060337;GO:0060700;GO:1903487;GO:0000166;GO:0001730;GO:…	K14216	EC:2.7.7.84	J;O	0DF4M;0V4TK;1CP6T;KOG0001;0UKKA;1AW2R;09TUC;12QYV	2'-5' oligoadenylate synthetase 2 [Source:MGI Symbol;Acc:MGI:2180852]	246728	E9Q9A9
ENSMUSG00000035671	1045.78	355.954	1735.6	4.8759	2.28567	2.46113e-30	6.80745e-29	8	84937307	84963684	-	4625	Zswim4	GO:0003674;GO:0008270;GO:0031462;GO:0046872;GO:1902667;	-	-	S	1B4U0;0V6Y9;12NM3;0US5R;0DM5V;09VZT;1D0ZM;KOG3615;195YM	zinc finger SWIM-type containing 4 [Source:MGI Symbol;Acc:MGI:2443726]	212168	Q8C7B8
ENSMUSG00000033697	354.712	628.28	81.1431	0.129151	-2.95287	2.66186e-30	7.3491e-29	15	76608185	76702370	-	7367	Arhgap39	GO:0005096;GO:0005634;GO:0005737;GO:0005856;GO:0007165;GO:0043547;GO:0098794;GO:0098978;GO:0099173;GO:0005096;GO:0005634;GO:0005737;GO:0005856;GO:0007165;GO:0043547;GO:0098794;GO:0098978;GO:0099173;GO:0005856;GO:0007165;GO:0098978;GO:0099173;GO:0005856;GO:0007165;	K20649	-	T	12PVF;0IG4K;18VVU;1CSW0;0DI5M;09WDI;0UNV5;0V7BW;1AZA4	Rho GTPase activating protein 39 [Source:MGI Symbol;Acc:MGI:107858]	223666	P59281;G3X932
ENSMUSG00000022035	847.267	209.531	1485	7.08728	2.82523	2.76169e-30	7.61066e-29	14	66074751	66104056	+	4897	Ccdc25	GO:0003674;GO:0008150;	-	-	S;P	0DPE1;0USGY;0VCMB;191ZU;KOG3272;1CYBT;1AXES;0A1RR;13N04	coiled-coil domain containing 25 [Source:MGI Symbol;Acc:MGI:1914429]	67179	Q78PG9;A0PK78
ENSMUSG00000080316	1159.5	178.151	2140.84	12.017	3.58701	2.91553e-30	8.01984e-29	17	18047420	18063271	+	7067	Spaca6	GO:0007342;GO:0007342;GO:0016020;GO:0016021;GO:0001669;GO:0002080;GO:0003674;GO:0007338;GO:0007342;GO:0007342;GO:0007342;GO:0007342;GO:0016020;GO:0016021;GO:0016021;GO:0031410;GO:0007342;GO:0007342;GO:0007342;	-	-	S	0UVVM;0A8WG;0VJST;0DV9U;0J0E7;13UVB;1D4KF;1B6I2;19425	sperm acrosome associated 6 [Source:MGI Symbol;Acc:MGI:1922452]	75202	E9Q8Q8
ENSMUSG00000031834	457.822	795.758	119.886	0.150657	-2.73066	2.95943e-30	8.12566e-29	8	71220820	71229357	-	4176	Pik3r2	GO:0001678;GO:0001784;GO:0005515;GO:0005515;GO:0005515;GO:0005634;GO:0005634;GO:0005925;GO:0005942;GO:0007165;GO:0008134;GO:0008286;GO:0008286;GO:0010506;GO:0010506;GO:0014065;GO:0014065;GO:0015031;GO:0019903;GO:0030833;GO:0030971;GO:0032869;GO:0034976;GO:0036312;GO:0042307;GO:0042307;GO:0043409;GO:0043551;GO:0045785;GO:0045944;GO:0046854;GO:0046935;GO:0046982;GO:0051492;GO:0090051;GO:1903076;GO:…	K02649	-	T	09UBX;0UR7U;KOG4637;1B143;12NNR;18X24;0DIHX;1CT8C;0V5B2	phosphoinositide-3-kinase regulatory subunit 2 [Source:MGI Symbol;Acc:MGI:1098772]	18709	O08908
ENSMUSG00000030966	3310.24	264.924	6355.55	23.9901	4.58436	3.22505e-30	8.83875e-29	7	102207128	102214693	-	3714	Trim21	GO:0000209;GO:0003713;GO:0004842;GO:0005634;GO:0005654;GO:0005737;GO:0006513;GO:0008270;GO:0010508;GO:0016567;GO:0019005;GO:0031648;GO:0032088;GO:0032092;GO:0032897;GO:0034341;GO:0042802;GO:0045087;GO:0045787;GO:0045824;GO:0045893;GO:0046598;GO:0046872;GO:0046872;GO:0051091;GO:0051865;GO:0061630;GO:0070534;GO:0090086;GO:1902187;GO:0008270;GO:0045893;GO:0046598;GO:0046872;GO:0046872;	K10651	EC:2.3.2.27	O;K	KOG2177;12QXR;0USXG;09UKA;0DFVY;18XES;1CQJA;0V5JK;1B05T	tripartite motif-containing 21 [Source:MGI Symbol;Acc:MGI:106657]	20821	Q3U7K7;Q3UCL2
ENSMUSG00000024404	6611.07	2633.53	10588.6	4.02068	2.00744	3.56474e-30	9.75187e-29	18	12261798	12290444	+	10963	Riok3	GO:0000166;GO:0002376;GO:0004674;GO:0004674;GO:0004674;GO:0004674;GO:0004674;GO:0005524;GO:0005524;GO:0005737;GO:0005829;GO:0006468;GO:0016301;GO:0016310;GO:0016740;GO:0030490;GO:0030490;GO:0030490;GO:0030688;GO:0030688;GO:0030688;GO:0031333;GO:0031333;GO:0032728;GO:0032728;GO:0039534;GO:0039534;GO:0042254;GO:0043124;GO:0043124;GO:0045087;GO:0045089;GO:0045089;GO:0046872;GO:0051607;GO:0071359;GO:…	K08872	EC:2.7.11.1	T	KOG2269;133R2;0VDK4;0A2QC;0DQBX;1AVIQ;18WJ7;0USZD;1CZDZ	RIO kinase 3 [Source:MGI Symbol;Acc:MGI:1914128]	66878	Q9DBU3
ENSMUSG00000032344	487.42	136.434	838.406	6.14515	2.61945	3.88885e-30	1.06191e-28	9	78337808	78350519	-	4126	Cgas	GO:0000166;GO:0002218;GO:0002218;GO:0002218;GO:0002218;GO:0002230;GO:0002230;GO:0002230;GO:0002230;GO:0002376;GO:0002637;GO:0003677;GO:0003677;GO:0003677;GO:0003682;GO:0003682;GO:0003682;GO:0003682;GO:0003690;GO:0003690;GO:0003690;GO:0003690;GO:0005515;GO:0005524;GO:0005525;GO:0005546;GO:0005546;GO:0005546;GO:0005634;GO:0005634;GO:0005634;GO:0005634;GO:0005737;GO:0005829;GO:0005829;GO:0005829;GO:…	K17834	EC:2.7.7.86	F;T	1D0CT;1AUUI;0DR7D;13J1Z;0IE27;1945C;0A3IW;0VD69;0UQ0U	cyclic GMP-AMP synthase [Source:MGI Symbol;Acc:MGI:2442261]	214763	Q8C6L5;Q8BSY1
ENSMUSG00000046157	1607.44	587.144	2627.73	4.47545	2.16203	4.39194e-30	1.1971e-28	12	79008569	79054401	-	4732	Tmem229b	GO:0003674;GO:0005575;GO:0009617;GO:0016020;GO:0016021;GO:0003674;GO:0005575;GO:0009617;GO:0016020;GO:0016021;GO:0003674;GO:0005575;GO:0009617;GO:0016020;GO:0016021;GO:0003674;GO:0005575;GO:0009617;GO:0016020;GO:0016021;GO:0016020;GO:0016021;	-	-	S	0DQ8Z;1AWET;1CZAT;0VDHC;13HZS;0UKYN;0A2MC;18XXK;0IH50	transmembrane protein 229B [Source:MGI Symbol;Acc:MGI:2444389]	268567	Q8BFQ2
ENSMUSG00000042364	2893.14	1113.89	4672.38	4.19464	2.06855	5.33808e-30	1.45235e-28	13	113728715	113755100	-	5220	Snx18	GO:0000278;GO:0000281;GO:0005546;GO:0005546;GO:0006897;GO:0015031;GO:0015031;GO:0016020;GO:0016197;GO:0030136;GO:0030659;GO:0031234;GO:0031410;GO:0031410;GO:0035091;GO:0036089;GO:0043547;GO:0070062;	K17923	-	U	18V65;0V6AB;KOG2528;0DGJI;0UIDK;09VB1;12QGZ;1CR9D;1ATXN	sorting nexin 18 [Source:MGI Symbol;Acc:MGI:2137642]	170625	Q8C788
ENSMUSG00000020572	17797.5	4311.7	31283.2	7.25543	2.85906	6.60392e-30	1.79349e-28	12	32869544	32903348	+	5054	Nampt	GO:0000166;GO:0001774;GO:0001774;GO:0003824;GO:0004514;GO:0005125;GO:0005125;GO:0005125;GO:0005576;GO:0005615;GO:0005634;GO:0005634;GO:0005634;GO:0005737;GO:0005737;GO:0005737;GO:0005829;GO:0005886;GO:0005886;GO:0007165;GO:0007565;GO:0007568;GO:0007623;GO:0007623;GO:0008144;GO:0009435;GO:0009435;GO:0009435;GO:0010507;GO:0010507;GO:0014070;GO:0014916;GO:0014916;GO:0016607;GO:0016607;GO:0016740;GO:…	K03462	EC:2.4.2.12	H	133FK;0A1S4;0DPEB;0VCMR;0IEB2;1CYC7;18YC7;0UITD;1B0MA	nicotinamide phosphoribosyltransferase [Source:MGI Symbol;Acc:MGI:1929865]	59027	Q99KQ4
ENSMUSG00000026482	2365.33	705.112	4025.54	5.70908	2.51326	6.78923e-30	1.84047e-28	1	152392511	152642102	-	6907	Rgl1	GO:0005085;GO:0005085;GO:0007165;GO:0007264;GO:0050790;GO:0005085;GO:0005085;GO:0007165;GO:0007264;GO:0050790;GO:0005085;GO:0005085;GO:0007165;GO:0007264;GO:0050790;GO:0005085;GO:0007264;GO:0050790;	K17635	-	T	19172;0USHX;1CTFJ;09XD2;0DIQG;0V8B2;1AXKW;KOG3629;12RJ9	ral guanine nucleotide dissociation stimulator,- like 1 [Source:MGI Symbol;Acc:MGI:107484]	19731	Q60695
ENSMUSG00000052353	209.419	35.1366	383.701	10.9203	3.44894	7.02769e-30	1.90167e-28	7	83582065	83735710	-	12232	Cemip	GO:0004415;GO:0004415;GO:0004415;GO:0005540;GO:0005540;GO:0005540;GO:0005576;GO:0005634;GO:0005737;GO:0005737;GO:0005737;GO:0005783;GO:0005783;GO:0005783;GO:0005886;GO:0005886;GO:0005886;GO:0005905;GO:0007605;GO:0007605;GO:0008152;GO:0010800;GO:0010800;GO:0010800;GO:0016020;GO:0016787;GO:0016798;GO:0030214;GO:0030214;GO:0030214;GO:0030335;GO:0030335;GO:0030335;GO:0030665;GO:0032050;GO:0032050;GO:…	K19031	EC:3.2.1.35	S	0V9F4;0UN3N;1AVBF;1CUR8;18VAX;12SC1;09YCH;0DJXS;0IFCM	cell migration inducing protein, hyaluronan binding [Source:MGI Symbol;Acc:MGI:2443629]	80982	Q8BI06;Q5M9P4
ENSMUSG00000019189	2065.71	637.617	3493.81	5.47948	2.45404	7.2072e-30	1.94672e-28	11	44409791	44456347	+	7786	Rnf145	GO:0005783;GO:0005783;GO:0005789;GO:0008270;GO:0012505;GO:0016020;GO:0016021;GO:0016567;GO:0016740;GO:0046872;GO:0061630;GO:0016020;GO:0016021;	K23789	EC:2.3.2.27	O	KOG0802;0DFHX;09U84;12T2W;1918R;0V579;1B06S;1CQ7R;0UQFS	ring finger protein 145 [Source:MGI Symbol;Acc:MGI:1921565]	74315	Q5SWK7
ENSMUSG00000043336	3480	945.576	6014.43	6.3606	2.66916	8.42058e-30	2.27037e-28	16	57173456	57393489	+	5335	Filip1l	GO:0003674;GO:0005575;GO:0005634;GO:0005737;GO:0008150;GO:0016020;	-	-	S	0IKR8;09TC4;0DEPE;13NQ8;1CPD6;1AS1Q;0V4B9;18YSH;0UG7B	filamin A interacting protein 1-like [Source:MGI Symbol;Acc:MGI:1925999]	78749	E0CYH7
ENSMUSG00000025464	271.974	505.728	38.2197	0.0755736	-3.72597	8.55644e-30	2.30285e-28	7	139695712	139717137	+	4907	Paox	GO:0016491;GO:0055114;GO:0005737;GO:0005777;GO:0005782;GO:0005782;GO:0006598;GO:0006598;GO:0008215;GO:0009446;GO:0009447;GO:0009447;GO:0016491;GO:0016491;GO:0016491;GO:0046203;GO:0046203;GO:0046208;GO:0046208;GO:0046592;GO:0046592;GO:0046592;GO:0052899;GO:0052901;GO:0052902;GO:0052903;GO:0052904;GO:0055114;GO:0055114;GO:1901307;GO:0016491;GO:0055114;	K00308	EC:1.5.3.13	H	0VC92;09TDI;1B0E8;1CXYT;0DP10;KOG0685;1950F;0UQNE;12TN7	polyamine oxidase (exo-N4-amino) [Source:MGI Symbol;Acc:MGI:1916983]	212503	Q8C0L6
ENSMUSG00000040328	273.96	4.593	543.328	118.295	6.88624	8.73459e-30	2.34658e-28	11	48869716	49026214	+	4724	Olfr56	GO:0004930;GO:0004930;GO:0004984;GO:0004984;GO:0005886;GO:0007165;GO:0007186;GO:0007186;GO:0007186;GO:0007608;GO:0007608;GO:0016020;GO:0016021;GO:0016021;GO:0016021;GO:0050896;GO:0050911;GO:0004930;GO:0004930;GO:0004984;GO:0004984;GO:0005886;GO:0007165;GO:0007186;GO:0007186;GO:0007186;GO:0007608;GO:0007608;GO:0016020;GO:0016021;GO:0016021;GO:0016021;GO:0050896;GO:0050911;GO:0004930;GO:0004930;GO:…	K04257	-	T	13NSQ;0A1JS;0VCFD;1CT4I;1B3NR;0DP7S;0USKG;194G3;0IJNK	olfactory receptor 56 [Source:MGI Symbol;Acc:MGI:1333785]	18356	Q8VGD6
ENSMUSG00000078616	1294.14	17.8151	2570.47	144.286	7.17279	9.73644e-30	2.61104e-28	7	104031272	104050044	-	1716	Trim30c	GO:0000209;GO:0005634;GO:0005654;GO:0005737;GO:0005737;GO:0005829;GO:0008270;GO:0010468;GO:0010508;GO:0016567;GO:0019901;GO:0032880;GO:0042803;GO:0043123;GO:0045087;GO:0046596;GO:0046872;GO:0051092;GO:0061630;	-	-	O;K	0B6AK;0WJ0G;13FYK;1DGAS;1BBGY;197FW;0E9FG;0ITFH;0V3TY	tripartite motif-containing 30C [Source:MGI Symbol;Acc:MGI:4821257]	434219	-
ENSMUSG00000047735	11675.1	1252.14	22098	17.6482	4.14145	1.01024e-29	2.70434e-28	6	3372257	3399572	-	5427	Samd9l	-	K23949	-	S	13G0G;0V4EM;0UNY9;1AYG8;09TFI;18UK2;1CPGA;0IETT;0DESJ	sterile alpha motif domain containing 9-like [Source:MGI Symbol;Acc:MGI:1343184]	209086	E9PX59;Q8BZG4
ENSMUSG00000027782	4550.04	1811.44	7288.64	4.02366	2.00851	1.21164e-29	3.23767e-28	3	68974482	69034446	-	8940	Kpna4	GO:0005654;GO:0006606;GO:0015031;GO:0031965;GO:0061608;GO:0005515;GO:0005515;GO:0005634;GO:0005634;GO:0005634;GO:0005654;GO:0005654;GO:0005737;GO:0005737;GO:0006606;GO:0006606;GO:0006607;GO:0008139;GO:0015031;GO:0031965;GO:0042542;GO:0061608;GO:0061608;GO:0061608;GO:0006606;GO:0015031;GO:0061608;	K23583	-	U	0V809;18UYN;1AWAT;09X23;0UJT2;1CT39;KOG0166;0DICS;12RBS	karyopherin (importin) alpha 4 [Source:MGI Symbol;Acc:MGI:1100848]	16649	O35343;Q4FJX1
ENSMUSG00000038235	207.063	35.106	379.02	10.7964	3.43248	1.2353e-29	3.29501e-28	1	171265103	171292171	+	2663	F11r	GO:0001817;GO:0005178;GO:0005178;GO:0005886;GO:0005886;GO:0005886;GO:0005911;GO:0005911;GO:0005923;GO:0005923;GO:0005923;GO:0005923;GO:0007155;GO:0007155;GO:0007159;GO:0007159;GO:0008360;GO:0008360;GO:0009314;GO:0016020;GO:0016021;GO:0030054;GO:0030154;GO:0030165;GO:0030165;GO:0030855;GO:0031032;GO:0031032;GO:0031410;GO:0031410;GO:0032956;GO:0032956;GO:0032991;GO:0032991;GO:0034260;GO:0034260;GO:…	K06089	-	T	09XN8;18W2H;13QXG;0IWUE;0VCEW;0DP77;0UHJE;1AT66;1CXHS	F11 receptor [Source:MGI Symbol;Acc:MGI:1321398]	16456	O88792
ENSMUSG00000032369	571.718	172.199	971.236	5.64018	2.49574	1.25015e-29	3.32869e-28	9	92131803	92154331	+	2462	Plscr1	GO:0000287;GO:0000287;GO:0001228;GO:0001228;GO:0001618;GO:0003677;GO:0004518;GO:0004518;GO:0005154;GO:0005154;GO:0005509;GO:0005509;GO:0005515;GO:0005634;GO:0005634;GO:0005654;GO:0005730;GO:0005730;GO:0005737;GO:0005737;GO:0005794;GO:0005794;GO:0005829;GO:0005829;GO:0005886;GO:0005886;GO:0005886;GO:0005887;GO:0005887;GO:0006659;GO:0006915;GO:0006953;GO:0006955;GO:0008270;GO:0008270;GO:0010288;GO:…	-	-	M;K	1AZ3W;09XTB;0V5F5;KOG0621;0UMQ1;12S1B;1CSJ2;0DG28	phospholipid scramblase 1 [Source:MGI Symbol;Acc:MGI:893575]	22038	Q9JJ00
ENSMUSG00000027195	3635.56	1432.68	5838.44	4.07519	2.02687	1.26018e-29	3.34944e-28	2	93863034	93988309	-	2407	Hsd17b12	GO:0001968;GO:0004303;GO:0005518;GO:0005783;GO:0005789;GO:0006629;GO:0006633;GO:0006694;GO:0006703;GO:0008201;GO:0009923;GO:0009923;GO:0010811;GO:0016020;GO:0016021;GO:0016491;GO:0016491;GO:0030198;GO:0031012;GO:0050062;GO:0050062;GO:0055114;GO:0055114;GO:0102339;GO:0102340;GO:0102341;GO:0102342;	K10251	-	Q;I	1AYP1;1CV0W;0UP3V;KOG1014;09UPB;0DK70;0V9QB;1929T;12QGJ	hydroxysteroid (17-beta) dehydrogenase 12 [Source:MGI Symbol;Acc:MGI:1926967]	56348	O70503;Q0VGQ1
ENSMUSG00000096054	1181.4	1947.3	415.504	0.213374	-2.22854	1.35854e-29	3.60013e-28	10	4970917	5501482	-	40491	Syne1	GO:0000932;GO:0003779;GO:0003779;GO:0005521;GO:0005634;GO:0005635;GO:0005640;GO:0005654;GO:0005730;GO:0005737;GO:0005794;GO:0007030;GO:0016020;GO:0016021;GO:0016021;GO:0016021;GO:0019899;GO:0030017;GO:0031965;GO:0034993;GO:0042692;GO:0045211;GO:0090292;GO:0140444;GO:0000932;GO:0002053;GO:0003779;GO:0003779;GO:0005102;GO:0005515;GO:0005515;GO:0005521;GO:0005634;GO:0005635;GO:0005635;GO:0005635;GO:…	K19326	-	Z	1CQAG;09UB4;0UZQ3;0V5A9;12UBG;KOG0516;0DFKT;0IUP1;0W32P;14GAB;0UZDD;1DAPI;0E3GD;0AQJ2	spectrin repeat containing, nuclear envelope 1 [Source:MGI Symbol;Acc:MGI:1927152]	64009	Q6ZWR6;Q6PI72
ENSMUSG00000035284	1770.96	2883.06	658.857	0.228527	-2.12956	1.35931e-29	3.60013e-28	9	67747678	67902920	+	16299	Vps13c	GO:0003674;GO:0005739;GO:0005741;GO:0005741;GO:0005741;GO:0005829;GO:0005829;GO:0006623;GO:0007005;GO:0007005;GO:0007005;GO:0016020;GO:0019898;GO:0032127;GO:0032868;GO:0045053;GO:1905090;GO:1905090;GO:1905090;	K19525	-	U	12PEB;1CX8F;0DHTX;1AXYH;09WIM;0UNYP;0V7H5;KOG1809;18U97	vacuolar protein sorting 13C [Source:MGI Symbol;Acc:MGI:2444207]	320528	Q8BX70;A1ILG8
ENSMUSG00000038213	696.381	214.344	1178.42	5.49778	2.45885	1.37317e-29	3.63041e-28	6	125200896	125208823	-	2352	Tapbpl	GO:0000139;GO:0002376;GO:0002502;GO:0002502;GO:0002590;GO:0002590;GO:0005783;GO:0005783;GO:0005783;GO:0005789;GO:0005794;GO:0005886;GO:0016020;GO:0016021;GO:0023024;GO:0023024;GO:0031090;GO:0043231;	-	-	T	0UUG6;0A4QI;1B3KF;0VFJM;13KM3;0IF63;0DS6T;18XP8;1D1FX	TAP binding protein-like [Source:MGI Symbol;Acc:MGI:2384853]	213233	Q8VD31
ENSMUSG00000021998	61194.1	25337.1	97051.1	3.8304	1.9375	1.5525e-29	4.09729e-28	14	75368541	75468282	+	9504	Lcp1	GO:0005509;GO:0051015;GO:0051017;GO:0005509;GO:0051015;GO:0051017;GO:0005509;GO:0051015;GO:0051017;GO:0001725;GO:0001726;GO:0001891;GO:0002102;GO:0002286;GO:0002286;GO:0003779;GO:0005178;GO:0005509;GO:0005515;GO:0005515;GO:0005737;GO:0005737;GO:0005737;GO:0005829;GO:0005829;GO:0005856;GO:0005884;GO:0005884;GO:0005886;GO:0005886;GO:0005925;GO:0009611;GO:0010737;GO:0015629;GO:0016020;GO:0016477;GO:…	K17276	-	Z	0V55N;12U9H;1CRV4;09VWS;KOG0046;1AX42;0DH4W;18VE7;0UMME	lymphocyte cytosolic protein 1 [Source:MGI Symbol;Acc:MGI:104808]	18826	Q61233
ENSMUSG00000040209	907.418	1719.98	94.858	0.0551507	-4.18048	1.57177e-29	4.14084e-28	3	9492080	9675145	-	15255	Zfp704	GO:0000978;GO:0000987;GO:0003677;GO:0003700;GO:0005634;GO:0005634;GO:0005634;GO:0006357;GO:0006357;GO:0046872;GO:1990837;GO:1990837;	-	-	S	1CWVS;0DMZI;18VV1;0A0CS;0VB90;12SRG;0UR86;0IGPR;1B1P5	zinc finger protein 704 [Source:MGI Symbol;Acc:MGI:2180715]	170753	Q9ERQ3
ENSMUSG00000058258	508.426	148.262	868.59	5.85846	2.55052	1.74457e-29	4.58801e-28	13	8935537	8942487	+	3505	Idi1	GO:0004452;GO:0004452;GO:0005777;GO:0005777;GO:0006694;GO:0006695;GO:0008202;GO:0008203;GO:0008299;GO:0008299;GO:0016126;GO:0016787;GO:0016853;GO:0050992;GO:0004452;GO:0004452;GO:0005777;GO:0006694;GO:0006695;GO:0008202;GO:0008203;GO:0008299;GO:0008299;GO:0016126;GO:0016787;GO:0016853;GO:0050992;GO:0004452;GO:0004452;GO:0005777;GO:0006694;GO:0006695;GO:0008202;GO:0008203;GO:0008299;GO:0008299;GO:…	K01823	EC:5.3.3.2	Q	KOG0142;0DHUS;12RXQ;1B400;0UNMJ;0V7I1;09TJQ;1CSJF;18WS0	isopentenyl-diphosphate delta isomerase [Source:MGI Symbol;Acc:MGI:2442264]	319554	P58044;G3XA48
ENSMUSG00000021701	7166.43	2920.22	11412.6	3.90814	1.96648	2.14463e-29	5.63023e-28	13	110531580	110537378	+	4491	Plk2	GO:0000082;GO:0000082;GO:0000082;GO:0000082;GO:0000166;GO:0000278;GO:0000278;GO:0000785;GO:0000922;GO:0004672;GO:0004674;GO:0004674;GO:0004674;GO:0004674;GO:0004674;GO:0005524;GO:0005524;GO:0005634;GO:0005737;GO:0005737;GO:0005737;GO:0005737;GO:0005813;GO:0005813;GO:0005813;GO:0005813;GO:0005814;GO:0005814;GO:0005814;GO:0005814;GO:0005856;GO:0006468;GO:0006468;GO:0006468;GO:0006468;GO:0006468;GO:…	K08861	EC:2.7.11.21	D	18SP6;0DJU6;0V605;09V0D;0UNVK;1B4GS;1CUT9;KOG0575;12PB0	polo like kinase 2 [Source:MGI Symbol;Acc:MGI:1099790]	20620	P53351;Q548A9;Q3TV29
ENSMUSG00000044103	73.9279	1.14006	146.716	128.691	7.00777	2.36253e-29	6.19139e-28	2	24076488	24083580	+	1648	Il1f9	GO:0005125;GO:0005576;GO:0005615;GO:0006954;GO:0006955;GO:0007165;	K05487	-	S;T	0DU9B;193AY;1B5RT;1D37D;13VEJ;0A7GF;0VI9K;0UVEV;0J1V3	interleukin 1 family, member 9 [Source:MGI Symbol;Acc:MGI:2449929]	215257	Q3U0P4
ENSMUSG00000021990	1688.88	105.685	3272.07	30.9606	4.95236	2.44293e-29	6.39091e-28	14	60871450	61002005	+	9102	Spata13	GO:0005085;GO:0035556;GO:0050790;GO:0005085;GO:0035556;GO:0050790;GO:0005085;GO:0035556;GO:0050790;	K05769	-	T	0E9K1;0V3XD;197H7;1DGF0;0WJ7F;0B6GY;1BBJR;0ITS0;13G73	spermatogenesis associated 13 [Source:MGI Symbol;Acc:MGI:104838]	219140	Q5DU57;E0CYU0
ENSMUSG00000030609	921.524	315.249	1527.8	4.84633	2.27689	2.607e-29	6.80823e-28	7	78545602	78560957	+	5801	Aen	GO:0003676;GO:0004518;GO:0004527;GO:0004527;GO:0004527;GO:0004527;GO:0005634;GO:0005634;GO:0005654;GO:0005654;GO:0005654;GO:0005730;GO:0005730;GO:0005730;GO:0006915;GO:0006974;GO:0010212;GO:0010212;GO:0010212;GO:0016787;GO:0031965;GO:0031965;GO:0042771;GO:0042771;GO:0042771;GO:0042771;GO:0090305;GO:0003676;GO:0004518;GO:0004527;GO:0004527;GO:0004527;GO:0005634;GO:0005634;GO:0005654;GO:0005654;GO:…	K18340	EC:3.1.-.-	L	13MVV;0DP42;1CZQR;KOG2249;18S7A;0A30D;0UTK6;0VDVH;1B0D2	apoptosis enhancing nuclease [Source:MGI Symbol;Acc:MGI:1915298]	68048	Q9CZI9
ENSMUSG00000062783	700.08	67.9755	1332.18	19.598	4.29263	2.67893e-29	6.98388e-28	GL456221.1	111572	163011	-	2719	Csprs	GO:0004930;GO:0004930;GO:0007186;GO:0007186;GO:0016020;GO:0016021;GO:0016021;	-	-	S	13UU3;0VD9J;0J1CI;0DS8G;1D158;0UUEC;18ZRG;1B5A6;0A5E0	component of Sp100-rs [Source:NCBI gene (formerly Entrezgene);Acc:114564]	114564	Q8BYZ8
ENSMUSG00000038058	941.9	236.3	1647.5	6.97205	2.80158	2.77501e-29	7.2218e-28	6	54900934	54949597	-	5079	Nod1	GO:0000166;GO:0002221;GO:0002376;GO:0002606;GO:0005515;GO:0005524;GO:0005737;GO:0005737;GO:0005829;GO:0005886;GO:0006915;GO:0006919;GO:0006952;GO:0010942;GO:0016020;GO:0016045;GO:0016045;GO:0016323;GO:0016323;GO:0016324;GO:0032731;GO:0032755;GO:0032757;GO:0032760;GO:0032874;GO:0035556;GO:0035556;GO:0035556;GO:0038187;GO:0042742;GO:0042742;GO:0042802;GO:0042803;GO:0042981;GO:0043123;GO:0043280;GO:…	K08727	-	T;I	09X63;0V84K;1CT7S;KOG4308;0DIH8;191K0;12UCX;0UHMA;1AT7Y	nucleotide-binding oligomerization domain containing 1 [Source:MGI Symbol;Acc:MGI:1341839]	107607	Q8BHB0;Q540J8
ENSMUSG00000006262	1794.22	674.813	2913.62	4.31767	2.11025	2.89651e-29	7.52489e-28	5	88868714	88912079	+	15033	Mob1b	GO:0005634;GO:0005654;GO:0005730;GO:0005737;GO:0005829;GO:0019209;GO:0019900;GO:0031952;GO:0035329;GO:0005634;GO:0005634;GO:0005654;GO:0005730;GO:0005737;GO:0005737;GO:0005829;GO:0016301;GO:0016310;GO:0019209;GO:0019209;GO:0019900;GO:0019900;GO:0031952;GO:0031952;GO:0033674;GO:0035329;GO:0046872;	K06685	-	D	0DND0;1CXA5;1953F;KOG0440;0A0RR;12T21;1B1AD;0VBN3;0UPH9	MOB kinase activator 1B [Source:MGI Symbol;Acc:MGI:1915723]	68473	Q8BPB0;Q3T9U1
ENSMUSG00000032633	1692.08	2753.56	630.607	0.229015	-2.12648	2.96161e-29	7.68068e-28	11	59682234	59700842	-	4322	Flcn	GO:0000122;GO:0000122;GO:0000122;GO:0001701;GO:0001932;GO:0001932;GO:0001934;GO:0005085;GO:0005096;GO:0005096;GO:0005515;GO:0005634;GO:0005634;GO:0005737;GO:0005737;GO:0005764;GO:0005765;GO:0005765;GO:0005813;GO:0005813;GO:0005815;GO:0005819;GO:0005829;GO:0005829;GO:0005829;GO:0005856;GO:0005886;GO:0005886;GO:0005929;GO:0005929;GO:0007043;GO:0009267;GO:0009267;GO:0010508;GO:0010508;GO:0010629;GO:…	K09594	-	K;E;U	09YA0;12RMJ;0V63X;0UNG7;1CUGG;18VAA;KOG3715;0DJPJ;1AYUW	folliculin [Source:MGI Symbol;Acc:MGI:2442184]	216805	Q8QZS3
ENSMUSG00000050953	1340.92	46.0502	2635.79	57.2373	5.83888	3.10241e-29	8.0319e-28	10	56253426	56278609	+	10257	Gja1	GO:0000132;GO:0001649;GO:0001701;GO:0001764;GO:0001937;GO:0001947;GO:0002070;GO:0002088;GO:0002544;GO:0003104;GO:0003294;GO:0003347;GO:0005102;GO:0005243;GO:0005243;GO:0005243;GO:0005515;GO:0005515;GO:0005515;GO:0005634;GO:0005654;GO:0005737;GO:0005739;GO:0005739;GO:0005741;GO:0005764;GO:0005768;GO:0005769;GO:0005770;GO:0005771;GO:0005783;GO:0005794;GO:0005829;GO:0005882;GO:0005886;GO:0005886;GO:…	K07372	-	T;W	1AYEC;0UNWZ;194Q4;13J4J;0IF97;09WA4;1CUUB;0V9HT;0DK0B	gap junction protein, alpha 1 [Source:MGI Symbol;Acc:MGI:95713]	14609	P23242;A0A654ICD2;Q8C4N2
ENSMUSG00000089715	153.951	292.115	15.7858	0.0540397	-4.20984	3.76137e-29	9.72109e-28	15	79708097	79718889	-	10609	Cbx6	GO:0000122;GO:0000122;GO:0000792;GO:0003727;GO:0005634;GO:0005634;GO:0005634;GO:0005694;GO:0006325;GO:0031519;GO:0031519;GO:0031519;	K11453	-	B	1DAI3;13SS2;0UZK4;0E3AG;1B8MI;0W1Y7;KOG2748;0APM4	chromobox 6 [Source:MGI Symbol;Acc:MGI:3512628]	494448	Q9DBY5
ENSMUSG00000030083	347.187	611.992	82.3824	0.134614	-2.8931	4.68136e-29	1.20779e-27	6	88812896	88818966	-	4862	Abtb1	GO:0005730;GO:0005829;GO:0005886;	K10520	-	S;K	09X8V;0UN2C;0V87D;1AZJ9;1CTB4;12QYM;0DIKB;18WQK;KOG0511	ankyrin repeat and BTB (POZ) domain containing 1 [Source:MGI Symbol;Acc:MGI:1933148]	80283	Q99LJ2;A0A0R4J0A1
ENSMUSG00000026170	685.684	1154.25	217.113	0.188098	-2.41044	6.48699e-29	1.67076e-27	1	74752733	74777051	+	2173	Cyp27a1	GO:0004497;GO:0005506;GO:0005739;GO:0005739;GO:0005739;GO:0005740;GO:0005743;GO:0005743;GO:0006629;GO:0006694;GO:0006699;GO:0006699;GO:0006699;GO:0006700;GO:0006707;GO:0006707;GO:0006707;GO:0008123;GO:0008202;GO:0008203;GO:0008203;GO:0008203;GO:0008386;GO:0016020;GO:0016491;GO:0016705;GO:0020037;GO:0020037;GO:0020037;GO:0020037;GO:0030343;GO:0030343;GO:0030343;GO:0030343;GO:0030544;GO:0030544;GO:…	K00488	EC:1.14.15.15	Q	1ARXH;0DGWI;09W4E;0V72R;12SBQ;1CRKT;KOG0159;18XXX;0UIUQ	cytochrome P450, family 27, subfamily a, polypeptide 1 [Source:MGI Symbol;Acc:MGI:88594]	104086	Q9DBG1
ENSMUSG00000052934	185.74	345.829	25.6506	0.0741713	-3.75299	6.80703e-29	1.75018e-27	8	122276179	122305545	-	5482	Fbxo31	GO:0005813;GO:0005813;GO:0006974;GO:0006974;GO:0006974;GO:0006974;GO:0007049;GO:0016567;GO:0019005;GO:0019005;GO:0019005;GO:0019005;GO:0019005;GO:0030332;GO:0030332;GO:0030332;GO:0031145;GO:0031145;GO:0031145;GO:0031146;GO:0031146;GO:0031146;GO:0031146;GO:0031146;GO:0031571;GO:0031571;GO:0031571;GO:0031571;GO:0043025;GO:0050775;GO:0050775;GO:2001224;GO:2001224;GO:0006974;GO:0006974;GO:0016020;GO:…	K10308	-	O;L	1CUPU;0IFQE;0DJWG;0UIIH;0V9E0;09YG6;1B2HM;190QS;12R69	F-box protein 31 [Source:MGI Symbol;Acc:MGI:1354708]	76454	Q3TQF0
ENSMUSG00000020017	2895.31	4646.33	1144.29	0.246277	-2.02165	6.93374e-29	1.7797e-27	10	93324630	93355166	+	5549	Hal	GO:0003824;GO:0004397;GO:0004397;GO:0004397;GO:0004397;GO:0004397;GO:0005737;GO:0006547;GO:0006548;GO:0006548;GO:0006548;GO:0016829;GO:0016841;GO:0016841;GO:0019556;GO:0019557;	K01745	EC:4.3.1.3	Q;E	0DKBU;135SB;KOG0222;18WP7;0V9U8;09YWH;0UP94;1CV5M;1AYUG	histidine ammonia lyase [Source:MGI Symbol;Acc:MGI:96010]	15109	P35492;Q8CE60;B2RXW1
ENSMUSG00000028266	5739.16	454.771	11023.5	24.2398	4.5993	7.50184e-29	1.92222e-27	3	143894291	143910981	-	3530	Lmo4	GO:0001843;GO:0001843;GO:0003281;GO:0005515;GO:0005515;GO:0005634;GO:0006357;GO:0008134;GO:0008134;GO:0021514;GO:0021522;GO:0021527;GO:0030334;GO:0031252;GO:0031333;GO:0033674;GO:0042659;GO:0045944;GO:0046872;GO:0048538;GO:0050865;GO:0090575;GO:0001843;GO:0001843;GO:0003281;GO:0005515;GO:0005515;GO:0005634;GO:0006357;GO:0008134;GO:0008134;GO:0021514;GO:0021522;GO:0021527;GO:0030334;GO:0031252;GO:…	K24099	-	K	13RR8;1CR25;0V62V;0UI3B;09V3A;0DGCP;18TWR;KOG0490;1ATP1	LIM domain only 4 [Source:MGI Symbol;Acc:MGI:109360]	16911	P61969;Q542S1
ENSMUSG00000034855	9473.7	3.77836	18943.6	5013.72	12.2917	7.73384e-29	1.97828e-27	5	92494497	92496748	-	2252	Cxcl10	GO:0002690;GO:0005125;GO:0005576;GO:0005576;GO:0005576;GO:0005576;GO:0005615;GO:0005615;GO:0005615;GO:0006935;GO:0006935;GO:0006935;GO:0006935;GO:0006952;GO:0006954;GO:0006954;GO:0006955;GO:0006955;GO:0007186;GO:0007186;GO:0007186;GO:0007189;GO:0007189;GO:0007189;GO:0008009;GO:0008009;GO:0008009;GO:0008009;GO:0008009;GO:0008201;GO:0008201;GO:0008284;GO:0009617;GO:0009897;GO:0010818;GO:0010818;GO:…	K12671	-	W	13VPQ;1B6SH;1D56C;193TZ;0DVW2;0A9VR;0VKR5;0UWIU;0J1VC	chemokine (C-X-C motif) ligand 10 [Source:MGI Symbol;Acc:MGI:1352450]	15945	P17515;Q548V9
ENSMUSG00000026395	21711.1	7622.34	35799.8	4.6967	2.23165	7.78215e-29	1.98724e-27	1	137990599	138103446	-	18313	Ptprc	GO:0000187;GO:0001779;GO:0001915;GO:0001916;GO:0001960;GO:0002244;GO:0002711;GO:0002923;GO:0002925;GO:0004721;GO:0004725;GO:0004725;GO:0004725;GO:0004725;GO:0004725;GO:0005102;GO:0005515;GO:0005515;GO:0005886;GO:0005886;GO:0005887;GO:0005887;GO:0005925;GO:0006469;GO:0006469;GO:0006469;GO:0006470;GO:0006470;GO:0006470;GO:0006933;GO:0007159;GO:0008201;GO:0009897;GO:0009898;GO:0009986;GO:0010332;GO:…	K06478	EC:3.1.3.48	-	-	protein tyrosine phosphatase, receptor type, C [Source:MGI Symbol;Acc:MGI:97810]	19264	P06800;Q8C6Q7
ENSMUSG00000029840	18435.2	7703.22	29167.2	3.78637	1.92081	9.15839e-29	2.33469e-27	6	35485841	35516823	-	3960	Mtpn	GO:0005634;GO:0005634;GO:0005634;GO:0005634;GO:0005737;GO:0005737;GO:0005737;GO:0005737;GO:0005829;GO:0005829;GO:0005829;GO:0006584;GO:0008290;GO:0008290;GO:0008361;GO:0008361;GO:0010557;GO:0010557;GO:0010557;GO:0010613;GO:0010613;GO:0010613;GO:0010613;GO:0021707;GO:0030307;GO:0030307;GO:0030307;GO:0030424;GO:0030424;GO:0043403;GO:0043565;GO:0043565;GO:0048471;GO:0051092;GO:0051092;GO:0051092;GO:…	-	-	K	1B65N;1D3HD;0A7W1;13SWY;0UV7B;0VJP7;0DU38;KOG4214;193BQ	myotrophin [Source:MGI Symbol;Acc:MGI:99445]	14489	P62774
ENSMUSG00000028337	2647.84	1042.76	4252.93	4.07851	2.02804	9.9166e-29	2.52367e-27	4	46536937	46602202	-	6459	Coro2a	GO:0003779;GO:0003779;GO:0005903;GO:0017053;GO:0017053;GO:0051015;GO:0051015;GO:0017053;GO:0017053;GO:0051015;GO:0003779;GO:0003779;GO:0005903;GO:0017053;GO:0017053;GO:0051015;GO:0051015;	K13887	-	Z	1AXMX;12NEF;0V4FS;09TGS;18WVV;KOG0303;1CVDP;0UKA6;0DEVK	coronin, actin binding protein 2A [Source:MGI Symbol;Acc:MGI:1345966]	107684	Q8C0P5;B1AVH4
ENSMUSG00000032898	232.23	422.991	41.4694	0.0980387	-3.35051	1.12055e-28	2.84684e-27	5	118114795	118148266	+	5545	Fbxo21	GO:0003677;GO:0005575;GO:0008150;GO:0003677;GO:0005575;GO:0008150;GO:0003677;	K10301	-	S	1CRFR;0DGRQ;13A2G;0URB7;0A0FP;0II53;18VXA;0VBBT;1AUV9	F-box protein 21 [Source:MGI Symbol;Acc:MGI:1924223]	231670	Q8VDH1
ENSMUSG00000037306	2597.22	4170.22	1024.21	0.245601	-2.02561	1.21354e-28	3.07787e-27	4	134289001	134431601	-	5722	Man1c1	GO:0000139;GO:0004571;GO:0004571;GO:0004571;GO:0005509;GO:0005509;GO:0005783;GO:0005794;GO:0005975;GO:0006013;GO:0006491;GO:0008152;GO:0016020;GO:0016020;GO:0016021;GO:0016787;GO:0016798;GO:0030166;GO:0000139;GO:0004571;GO:0004571;GO:0004571;GO:0005509;GO:0005509;GO:0005783;GO:0005794;GO:0005975;GO:0006013;GO:0006491;GO:0008152;GO:0016020;GO:0016020;GO:0016021;GO:0016787;GO:0016798;GO:0030166;	K01230	EC:3.2.1.113	G	0V66Z;12P5U;KOG2431;0USEQ;195V7;09V7E;0DGG8;1B3WH;1CR5U	mannosidase, alpha, class 1C, member 1 [Source:MGI Symbol;Acc:MGI:2446214]	230815	Q6NXK9
ENSMUSG00000032733	299.652	533.533	65.7707	0.123274	-3.02006	1.26773e-28	3.20986e-27	9	56824477	56835655	-	4571	Snx33	GO:0000278;GO:0000281;GO:0000281;GO:0000281;GO:0000281;GO:0005737;GO:0005829;GO:0005829;GO:0005829;GO:0006886;GO:0006897;GO:0006897;GO:0006897;GO:0006897;GO:0007032;GO:0007032;GO:0007032;GO:0007049;GO:0015031;GO:0015031;GO:0016020;GO:0016020;GO:0016020;GO:0016197;GO:0016197;GO:0016197;GO:0017038;GO:0017038;GO:0019898;GO:0019898;GO:0019898;GO:0019898;GO:0030659;GO:0031410;GO:0031410;GO:0031410;GO:…	K17923	-	U	1B3SR;0V6AB;KOG2528;0USIS;0DGJI;09VB1;18Y5T;12QGZ;1CR9D	sorting nexin 33 [Source:MGI Symbol;Acc:MGI:2443239]	235406	Q4VAA7
ENSMUSG00000031897	2260.6	430.934	4090.27	9.49163	3.24666	1.45239e-28	3.6712e-27	8	106662367	106665076	-	1705	Psmb10	GO:0000502;GO:0000902;GO:0002376;GO:0004175;GO:0004175;GO:0004298;GO:0004298;GO:0005634;GO:0005634;GO:0005654;GO:0005737;GO:0005737;GO:0005829;GO:0005839;GO:0005839;GO:0005839;GO:0005839;GO:0006508;GO:0008233;GO:0010499;GO:0016787;GO:0019774;GO:0042098;GO:0043161;GO:0051603;GO:1990111;	K02733	EC:3.4.25.1	O	1B4QV;KOG0173;09UF2;18UXV;12SP3;0DFQT;0UNHW;0V5EB;1CQEF	proteasome (prosome, macropain) subunit, beta type 10 [Source:MGI Symbol;Acc:MGI:1096380]	19171	O35955
ENSMUSG00000023460	1994.8	770.572	3219.04	4.17746	2.06263	1.4745e-28	3.72082e-27	17	66801507	66826724	-	3033	Rab12	GO:0003924;GO:0005525;GO:0032482;GO:0000139;GO:0000166;GO:0003924;GO:0005525;GO:0005525;GO:0005764;GO:0005765;GO:0005768;GO:0005768;GO:0005776;GO:0005794;GO:0005794;GO:0005886;GO:0006904;GO:0006914;GO:0008021;GO:0008333;GO:0009306;GO:0015031;GO:0016020;GO:0016239;GO:0017157;GO:0019003;GO:0019003;GO:0030141;GO:0031410;GO:0032482;GO:0032593;GO:0032869;GO:0044257;GO:0045335;GO:0055037;GO:0055038;GO:…	K07907	-	U	1CRJQ;13HMG;0DNJC;0UNEF;0VBUE;1B4WU;KOG0078;0A0Y3;18Z01	RAB12, member RAS oncogene family [Source:MGI Symbol;Acc:MGI:894284]	19328	P35283
ENSMUSG00000034266	461.611	33.1557	890.065	26.845	4.74658	1.48788e-28	3.74825e-27	12	85733443	85755861	+	1406	Batf	GO:0000978;GO:0000978;GO:0000981;GO:0001228;GO:0001816;GO:0002320;GO:0003677;GO:0003677;GO:0003700;GO:0003700;GO:0005515;GO:0005515;GO:0005634;GO:0005634;GO:0005654;GO:0005654;GO:0005737;GO:0006355;GO:0006357;GO:0006357;GO:0006974;GO:0030154;GO:0030154;GO:0030330;GO:0042832;GO:0043011;GO:0043565;GO:0045064;GO:0045190;GO:0045944;GO:0060218;GO:0072539;GO:0072540;GO:1990837;GO:1990837;	K09034	-	K	1D3TV;13SWU;0UVMH;0A7Q5;KOG1414;0VIIN;19426;1B5UP;0DUG4	basic leucine zipper transcription factor, ATF-like [Source:MGI Symbol;Acc:MGI:1859147]	53314	O35284
ENSMUSG00000044456	1275.87	470.157	2081.59	4.42744	2.14647	1.52755e-28	3.84172e-27	12	102249307	102357114	+	6835	Rin3	GO:0002091;GO:0002091;GO:0005085;GO:0005085;GO:0005085;GO:0005096;GO:0005737;GO:0005737;GO:0005737;GO:0005768;GO:0005769;GO:0005769;GO:0005769;GO:0007165;GO:0030139;GO:0030139;GO:0030424;GO:0030425;GO:0031267;GO:0031267;GO:0031267;GO:0031410;GO:0031410;GO:0031410;GO:0031982;GO:0043025;GO:0043547;GO:0050790;GO:0060755;GO:0060755;GO:0097494;GO:0005096;GO:0007165;GO:0043547;	K23687	-	U	0V58G;12NMD;1CQ8V;09U9B;0DFJ4;KOG2320;1AWUN;18XDY;0UGX4	Ras and Rab interactor 3 [Source:MGI Symbol;Acc:MGI:2385708]	217835	P59729;Q6PDX1
ENSMUSG00000037110	820.408	279.909	1360.91	4.86197	2.28154	1.63568e-28	4.10677e-27	2	146081799	146354264	-	18811	Ralgapa2	GO:0005096;GO:0005096;GO:0005634;GO:0043547;GO:0051056;GO:0005096;GO:0005096;GO:0005634;GO:0005737;GO:0005829;GO:0005886;GO:0043547;GO:0051056;GO:0005096;GO:0005096;GO:0005634;GO:0043547;GO:0051056;GO:0005096;GO:0005096;GO:0005096;GO:0005096;GO:0005634;GO:0005737;GO:0005737;GO:0005737;GO:0005829;GO:0005829;GO:0005886;GO:0032484;GO:0032880;GO:0043547;GO:0046982;GO:0046982;GO:0051056;GO:0060178;GO:…	-	-	T	1ARHB;0DEEZ;0UFCR;18S8A;09T3U;1CP4Q;0V42K;12NG2;KOG3686	Ral GTPase activating protein, alpha subunit 2 (catalytic) [Source:MGI Symbol;Acc:MGI:3036245]	241694	A3KGS3;A0A0A0MQD7
ENSMUSG00000019823	826.687	1490.05	163.322	0.109608	-3.18957	1.66821e-28	4.18142e-27	10	41352310	41363028	+	6047	Mical1	GO:0001933;GO:0003779;GO:0003779;GO:0003779;GO:0004497;GO:0004497;GO:0005515;GO:0005737;GO:0005737;GO:0005737;GO:0005856;GO:0016174;GO:0016174;GO:0016491;GO:0016709;GO:0016709;GO:0016709;GO:0017124;GO:0017124;GO:0017124;GO:0019417;GO:0019901;GO:0030042;GO:0030042;GO:0030042;GO:0030496;GO:0030496;GO:0031267;GO:0043066;GO:0043154;GO:0045171;GO:0045171;GO:0046872;GO:0055114;GO:0055114;GO:0055114;GO:…	K19947	EC:1.14.13.225	Z	1AYA8;18XFT;0A3TE;13HVG;1D090;KOG1700;0UNT7;0VEMW;0DGNK	microtubule associated monooxygenase, calponin and LIM domain containing 1 [Source:MGI Symbol;Acc:MGI:2385847]	171580	Q8VDP3
ENSMUSG00000032965	456.594	62.533	850.656	13.6033	3.76589	1.74674e-28	4.37093e-27	16	49519596	49585489	+	2862	Ift57	GO:0001843;GO:0001947;GO:0003677;GO:0005515;GO:0005737;GO:0005794;GO:0005794;GO:0005794;GO:0005813;GO:0005813;GO:0005856;GO:0005929;GO:0005929;GO:0005929;GO:0005929;GO:0005929;GO:0005930;GO:0006915;GO:0006915;GO:0006915;GO:0006919;GO:0006919;GO:0007224;GO:0030992;GO:0030992;GO:0030992;GO:0031514;GO:0032391;GO:0036064;GO:0036064;GO:0042073;GO:0042073;GO:0042981;GO:0042981;GO:0042995;GO:0044292;GO:…	K04638	-	T;K	0UG33;KOG0972;18WPP;0V4N8;1CPP6;09TP2;1ARW8;12NAN;0DEZG	intraflagellar transport 57 [Source:MGI Symbol;Acc:MGI:1921166]	73916	Q8BXG3;B2RQZ0
ENSMUSG00000003352	131.003	13.9385	248.068	17.7974	4.15359	1.76304e-28	4.40437e-27	15	98528721	98542410	+	4010	Cacnb3	GO:0005244;GO:0005245;GO:0005262;GO:0005737;GO:0005891;GO:0006811;GO:0006816;GO:0034765;GO:0070588;GO:0070588;GO:0005244;GO:0005245;GO:0005262;GO:0005737;GO:0005891;GO:0006811;GO:0006816;GO:0034765;GO:0070588;GO:0070588;GO:0005244;GO:0005245;GO:0005245;GO:0005245;GO:0005245;GO:0005246;GO:0005246;GO:0005246;GO:0005262;GO:0005515;GO:0005737;GO:0005886;GO:0005891;GO:0005891;GO:0005891;GO:0005891;GO:…	K04864	-	T;P	1CSXY;09UPJ;1AXSB;KOG3812;1951E;0V5P5;12NVH;0UHA2;0DI7I	calcium channel, voltage-dependent, beta 3 subunit [Source:MGI Symbol;Acc:MGI:103307]	12297	P54285
ENSMUSG00000038301	6689.03	1436.69	11941.4	8.31173	3.05515	1.77031e-28	4.41516e-27	6	51500881	51567659	+	9300	Snx10	GO:0001696;GO:0005545;GO:0005545;GO:0005545;GO:0005634;GO:0005634;GO:0005634;GO:0005737;GO:0005768;GO:0005783;GO:0005783;GO:0005783;GO:0005813;GO:0005813;GO:0005813;GO:0005815;GO:0005856;GO:0006886;GO:0006897;GO:0007032;GO:0007032;GO:0007032;GO:0008289;GO:0010008;GO:0015031;GO:0016020;GO:0030030;GO:0030141;GO:0030316;GO:0031313;GO:0031313;GO:0031313;GO:0035091;GO:0035630;GO:0044691;GO:0045453;GO:…	K17924	-	U	0UN80;192EM;1D181;12PUM;KOG2527;1B3VR;0A4G6;0VFB4;0DHE5	sorting nexin 10 [Source:MGI Symbol;Acc:MGI:1919232]	71982	Q9CWT3;Q4FJX6;Q3UBN7
ENSMUSG00000005102	547.158	931.06	163.256	0.175344	-2.51174	1.80577e-28	4.4961e-27	2	118219099	118305715	+	7457	Eif2ak4	GO:0000077;GO:0000166;GO:0004672;GO:0004674;GO:0004694;GO:0004694;GO:0005524;GO:0005524;GO:0006468;GO:0010998;GO:0010998;GO:0016301;GO:0016310;GO:0016740;GO:0034198;GO:0036492;GO:0070417;GO:0106310;GO:0106311;GO:0140469;GO:0004672;GO:0005524;GO:0006468;GO:0000077;GO:0000166;GO:0004672;GO:0004674;GO:0004694;GO:0005524;GO:0005524;GO:0006468;GO:0010998;GO:0016301;GO:0016310;GO:0016740;GO:0106310;GO:…	K16196	EC:2.7.11.1	J	1CVYT;0DPZU;12R1Z;0V7I4;09ZWW;0UPRH;KOG1035;18W8X;1AZE3	eukaryotic translation initiation factor 2 alpha kinase 4 [Source:MGI Symbol;Acc:MGI:1353427]	27103	Q9QZ05;A2AUM0
ENSMUSG00000002289	112.773	219.619	5.92656	0.0269857	-5.21166	1.90357e-28	4.73174e-27	17	33992724	34000804	-	3541	Angptl4	GO:0001525;GO:0001525;GO:0001666;GO:0004857;GO:0004857;GO:0005102;GO:0005576;GO:0005576;GO:0005576;GO:0005615;GO:0005615;GO:0005615;GO:0005615;GO:0006629;GO:0009267;GO:0042802;GO:0042802;GO:0042802;GO:0043066;GO:0043066;GO:0043066;GO:0043066;GO:0043335;GO:0043335;GO:0045834;GO:0051005;GO:0051005;GO:0051005;GO:0062023;GO:0070328;GO:0070328;GO:2000352;GO:0001525;GO:0005576;GO:0005615;GO:0043066;	K08767	-	S;W;E	18W2C;0DHPK;0VDSJ;1CZMH;1AZPH;0UI82;KOG2579;0A2XA;13K55	angiopoietin-like 4 [Source:MGI Symbol;Acc:MGI:1888999]	57875	Q9Z1P8
ENSMUSG00000030142	47141.6	149.879	94133.4	628.064	9.29477	1.90724e-28	4.73299e-27	6	123258748	123266829	-	4965	Clec4e	GO:0001819;GO:0002221;GO:0002221;GO:0002292;GO:0002376;GO:0005509;GO:0005509;GO:0005515;GO:0006955;GO:0016020;GO:0016020;GO:0016021;GO:0030246;GO:0038023;GO:0038094;GO:0038187;GO:0038187;GO:0042742;GO:0045087;GO:0045087;GO:0046872;GO:0030246;GO:0016020;GO:0016021;	K10059	-	T;V	190YU;1ASJP;0A26J;0VD26;13PWZ;KOG4297;1CYTX;0DJCR;0UJMI	C-type lectin domain family 4, member e [Source:MGI Symbol;Acc:MGI:1861232]	56619	Q9R0Q8;Q4FK29
ENSMUSG00000041115	1578.6	598.15	2559.04	4.27827	2.09703	2.06915e-28	5.12628e-27	X	150927264	151008232	+	6980	Iqsec2	GO:0005515;GO:0005737;GO:0032012;GO:0050790;GO:0005085;GO:0005737;GO:0032012;GO:0050804;GO:0098685;GO:0098696;GO:0005737;GO:0032012;GO:0005737;GO:0032012;	K12495	-	U	12PV8;09ZI9;1CX1I;0VBE4;18ZMH;0UMJR;KOG0931;1AX2C;0DK0E	IQ motif and Sec7 domain 2 [Source:MGI Symbol;Acc:MGI:3528396]	245666	D3Z6V7
ENSMUSG00000027276	1029.19	355.489	1702.88	4.79025	2.2601	2.08497e-28	5.15694e-27	2	136923376	136958564	-	5827	Jag1	GO:0001953;GO:0001953;GO:0001974;GO:0002011;GO:0002456;GO:0002456;GO:0003184;GO:0003184;GO:0003184;GO:0003215;GO:0005112;GO:0005112;GO:0005112;GO:0005112;GO:0005112;GO:0005509;GO:0005509;GO:0005515;GO:0005515;GO:0005543;GO:0005543;GO:0005886;GO:0005886;GO:0005886;GO:0005912;GO:0007154;GO:0007219;GO:0007219;GO:0007219;GO:0007219;GO:0007275;GO:0007275;GO:0009887;GO:0010628;GO:0016020;GO:0016020;GO:…	K06052	-	T	1CTAH;0V4PR;1ATQA;KOG1217;0DF5Z;09TVI;18S85;12NZS;0UIT7	jagged 1 [Source:MGI Symbol;Acc:MGI:1095416]	16449	Q9QXX0;Q3UVN4
ENSMUSG00000066595	968.236	1677.14	259.337	0.154631	-2.6931	2.28674e-28	5.64665e-27	1	190738044	190758355	-	5177	Flvcr1	GO:0001568;GO:0001701;GO:0005739;GO:0005739;GO:0005739;GO:0005739;GO:0005886;GO:0006839;GO:0006839;GO:0006839;GO:0015232;GO:0015232;GO:0015232;GO:0015886;GO:0015886;GO:0016020;GO:0016021;GO:0020037;GO:0022857;GO:0030218;GO:0030218;GO:0030218;GO:0031966;GO:0035108;GO:0035264;GO:0042733;GO:0043249;GO:0046620;GO:0048536;GO:0048704;GO:0055085;GO:0060323;GO:0097037;GO:0097037;GO:0097037;GO:0016020;GO:…	K08220	-	T;B;U	1B4QB;09WK6;12TPY;18TD0;KOG2563;1CSK7;0V7IS;0UQU1;0DHVK	feline leukemia virus subgroup C cellular receptor 1 [Source:MGI Symbol;Acc:MGI:2444881]	226844	B2RXV4
ENSMUSG00000021298	65.3768	0.358181	130.395	364.049	8.50799	2.31703e-28	5.71204e-27	12	112814493	112831848	-	2715	Gpr132	GO:0000082;GO:0000082;GO:0004930;GO:0004930;GO:0004930;GO:0005886;GO:0005887;GO:0007165;GO:0007186;GO:0007186;GO:0010972;GO:0010972;GO:0016020;GO:0016021;GO:0016021;	K08426	-	T	0IKDS;1B1MA;1CX95;0A0QP;1920R;0VBKZ;0DNC1;0UG1P;13M9I	G protein-coupled receptor 132 [Source:MGI Symbol;Acc:MGI:1890220]	56696	Q9Z282
ENSMUSG00000070730	636.476	205.652	1067.3	5.18984	2.37569	2.33823e-28	5.75481e-27	2	118967482	118987515	-	3537	Rmdn3	GO:0000922;GO:0005634;GO:0005737;GO:0005739;GO:0005739;GO:0005739;GO:0005741;GO:0005741;GO:0005741;GO:0005819;GO:0005856;GO:0005874;GO:0005876;GO:0005876;GO:0006874;GO:0006874;GO:0006874;GO:0006915;GO:0008017;GO:0008017;GO:0016020;GO:0016021;GO:0030154;GO:0044232;GO:0044232;GO:0045171;GO:0045171;GO:0097431;GO:0097431;GO:0016020;GO:0016021;GO:0016020;GO:0016021;GO:0016020;GO:0016021;	K23293	-	S;M	0IFRV;09YIJ;0UGJ5;1ASB3;191IM;0DFAV;0V4ZV;1CQ0M;12R8R	regulator of microtubule dynamics 3 [Source:MGI Symbol;Acc:MGI:1915059]	67809	Q3UJU9
ENSMUSG00000027435	4591.23	7297.79	1884.68	0.258253	-1.95314	2.41007e-28	5.92188e-27	2	148278560	148285483	-	6677	Cd93	GO:0001849;GO:0001849;GO:0005509;GO:0005886;GO:0005886;GO:0007155;GO:0009986;GO:0016020;GO:0016021;GO:0030246;GO:0031410;GO:0098609;GO:0098609;GO:0098609;	K06702	-	W;T	13J7Q;18U2X;0IJQN;1CXI8;0UQ99;0DNM0;0A0ZM;1ATJD;0VBW3	CD93 antigen [Source:MGI Symbol;Acc:MGI:106664]	17064	O89103
ENSMUSG00000022749	4061.44	1654.71	6468.17	3.90894	1.96678	2.46956e-28	6.05811e-27	16	56989225	57051867	-	9802	Tbc1d23	GO:0005515;GO:0005794;GO:0005794;GO:0005802;GO:0005802;GO:0005802;GO:0005829;GO:0007275;GO:0007420;GO:0007420;GO:0016192;GO:0031175;GO:0031410;GO:0031410;GO:0032680;GO:0032755;GO:0042147;GO:0042147;GO:0042147;GO:0050727;GO:0071203;GO:0071203;GO:0071203;GO:0099041;GO:0099041;GO:0099041;GO:1990403;GO:1990403;GO:0005794;GO:0005794;GO:0005802;GO:0005829;GO:0007275;GO:0007420;GO:0031410;GO:0042147;GO:…	K22555	-	S	192EJ;1B0GC;0V5EY;09UFK;KOG3636;0DFRA;12QVX;1CQEV;0UN5H	TBC1 domain family, member 23 [Source:MGI Symbol;Acc:MGI:1914831]	67581	Q8K0F1
ENSMUSG00000079003	214.433	392.596	36.2698	0.0923847	-3.4362	2.51396e-28	6.15693e-27	8	84724130	84727038	+	2564	Samd1	GO:0003682;GO:0005576;GO:0005634;GO:0005737;GO:0042393;GO:0045892;	-	-	S;T;W	0IX26;191UN;1CZ7K;1B2GB;0DQ6A;0USD7;0VC8Q;0A2IT;13RUI	sterile alpha motif domain containing 1 [Source:MGI Symbol;Acc:MGI:2142433]	666704	D3YXK1
ENSMUSG00000027544	427.485	809.506	45.4627	0.056161	-4.15429	2.54099e-28	6.21298e-27	2	168318330	168443577	-	10578	Nfatc2	GO:0000122;GO:0000785;GO:0000785;GO:0000976;GO:0000976;GO:0000978;GO:0000978;GO:0000978;GO:0000981;GO:0000981;GO:0001227;GO:0001228;GO:0003677;GO:0003677;GO:0003682;GO:0003700;GO:0003700;GO:0005515;GO:0005515;GO:0005515;GO:0005634;GO:0005634;GO:0005634;GO:0005634;GO:0005654;GO:0005654;GO:0005654;GO:0005667;GO:0005667;GO:0005737;GO:0005737;GO:0005737;GO:0005829;GO:0005829;GO:0005829;GO:0005829;GO:…	K17332	-	K	0IHFR;0V7UX;09WWQ;1AWMG;0UHPX;1CSXJ;18UCR;12U00;0DI76	nuclear factor of activated T cells, cytoplasmic, calcineurin dependent 2 [Source:MGI Symbol;Acc:MGI:102463]	18019	Q60591;B5B2P6
ENSMUSG00000036432	404.741	111.942	697.54	6.23125	2.63952	2.83525e-28	6.92115e-27	3	58582359	58599821	-	2999	Siah2	GO:0004842;GO:0004842;GO:0005515;GO:0005515;GO:0005634;GO:0005654;GO:0005654;GO:0005737;GO:0005737;GO:0005737;GO:0005769;GO:0005769;GO:0005829;GO:0005829;GO:0005829;GO:0006511;GO:0006511;GO:0006511;GO:0006511;GO:0006915;GO:0007049;GO:0007275;GO:0008270;GO:0016567;GO:0016740;GO:0031396;GO:0031396;GO:0031624;GO:0031624;GO:0031624;GO:0042752;GO:0042752;GO:0042752;GO:0043005;GO:0043005;GO:0043025;GO:…	K08742	EC:2.3.2.27	O	0DPQ1;KOG3002;12QM3;190VH;0V8J1;09XMC;1CYP1;0US07;1AUV0	siah E3 ubiquitin protein ligase 2 [Source:MGI Symbol;Acc:MGI:108062]	20439	Q06986;Q3UEV2
ENSMUSG00000039146	3134.49	148.752	6120.23	41.1439	5.36261	2.97433e-28	7.24883e-27	3	151464374	151468529	-	1376	Ifi44l	GO:0005737;	-	-	S	0V4Y2;0DF95;12T23;1AUP3;0UGGH;09TZ5;0IDX3;1CPYR	interferon-induced protein 44 like [Source:MGI Symbol;Acc:MGI:95975]	15061	Q9BDB7
ENSMUSG00000025880	209.971	385.072	34.8709	0.090557	-3.46503	3.10577e-28	7.55688e-27	18	75500600	75529006	+	4521	Smad7	GO:0000122;GO:0000122;GO:0000785;GO:0001650;GO:0001650;GO:0001657;GO:0002725;GO:0003677;GO:0005515;GO:0005515;GO:0005518;GO:0005634;GO:0005634;GO:0005634;GO:0005654;GO:0005654;GO:0005654;GO:0005667;GO:0005737;GO:0005737;GO:0005737;GO:0005813;GO:0005813;GO:0005829;GO:0005829;GO:0005829;GO:0005886;GO:0005886;GO:0005912;GO:0005912;GO:0006355;GO:0007179;GO:0007179;GO:0007179;GO:0008013;GO:0008013;GO:…	K19631	-	T;K	0DH25;KOG3701;1CRSC;12QX6;0V6SJ;195KV;1ARI2;0UJ2T;09VTT	SMAD family member 7 [Source:MGI Symbol;Acc:MGI:1100518]	17131	O35253;B2RPW6
ENSMUSG00000032261	6193.93	1422.79	10965.1	7.70675	2.94612	3.1913e-28	7.75238e-27	9	83430380	83520854	+	7865	Sh3bgrl2	GO:0005654;GO:0031965;GO:0005515;GO:0005634;GO:0005654;GO:0008150;GO:0017124;GO:0031965;	K23740	-	O	KOG4023;193PZ;0UVF4;13U5R;1B63B;1D3R6;0VIFK;0DUDJ;0A7IZ	SH3 domain binding glutamic acid-rich protein like 2 [Source:MGI Symbol;Acc:MGI:1915350]	212531	Q8BG73
ENSMUSG00000060429	160.499	23.452	297.546	12.6874	3.66533	3.67908e-28	8.92281e-27	15	55499784	55770345	-	5324	Sntb1	GO:0003779;GO:0005198;GO:0005515;GO:0005515;GO:0005516;GO:0005737;GO:0005856;GO:0005886;GO:0016010;GO:0016020;GO:0030054;GO:0030165;GO:0030165;GO:0032991;GO:0032991;GO:0042383;GO:0045202;GO:0045202;GO:0003779;GO:0005198;GO:0005515;GO:0005515;GO:0005516;GO:0005737;GO:0005856;GO:0005886;GO:0016010;GO:0016020;GO:0030054;GO:0030165;GO:0032991;GO:0042383;GO:0045202;GO:0045202;	K24064	-	W	1CU29;0DJA7;194B4;KOG3551;0V8UW;09UHJ;1349P;1B0ED;0UMZD	syntrophin, basic 1 [Source:MGI Symbol;Acc:MGI:101781]	20649	Q99L88
ENSMUSG00000005514	7909.41	12503	3315.85	0.265205	-1.91482	3.99493e-28	9.67317e-27	5	135698887	135764180	+	4021	Por	GO:0010181;GO:0016020;GO:0016021;GO:0016491;GO:0055114;GO:0010181;GO:0016020;GO:0016021;GO:0055114;GO:0003420;GO:0003420;GO:0003958;GO:0003958;GO:0003958;GO:0003958;GO:0003958;GO:0004128;GO:0004128;GO:0005737;GO:0005739;GO:0005739;GO:0005783;GO:0005789;GO:0005829;GO:0007584;GO:0008941;GO:0008941;GO:0009055;GO:0009055;GO:0009437;GO:0009725;GO:0009812;GO:0010181;GO:0010181;GO:0010181;GO:0010181;GO:…	K00327	EC:1.6.2.4	C	0V437;1CPFH;09TEP;1ARM6;18SCJ;0UFSC;KOG1158;12N1H;0DERQ	P450 (cytochrome) oxidoreductase [Source:MGI Symbol;Acc:MGI:97744]	18984	P37040
ENSMUSG00000033799	1297.16	346.775	2247.54	6.48127	2.69628	4.32631e-28	1.04586e-26	13	3616035	3661108	-	12454	Tasor2	GO:0003674;GO:0005654;GO:0005829;GO:0008150;	-	-	O	0A3B5;1CTWU;0UIHP;0II9C;18WRM;0VE61;12Z4D;0DJ4Z;1AXA9	transcription activation suppressor family member 2 [Source:MGI Symbol;Acc:MGI:2145274]	105203	Q5DTT3
ENSMUSG00000069793	5228.81	452.401	10005.2	22.1158	4.46701	4.4202e-28	1.06684e-26	11	82869216	82882656	-	5965	Slfn9	GO:0000049;GO:0000166;GO:0004518;GO:0004519;GO:0004521;GO:0005524;GO:0005634;GO:0005737;GO:0005737;GO:0008270;GO:0016787;GO:0046872;GO:0051607;GO:0090305;GO:0090502;GO:0000049;GO:0000166;GO:0004518;GO:0004519;GO:0004521;GO:0005524;GO:0005634;GO:0005737;GO:0005737;GO:0008270;GO:0016787;GO:0046872;GO:0051607;GO:0090305;GO:0090502;	K24459	EC:3.1.-.-	S	13MK6;0DNJW;1CXGY;0IJEW;0VBV2;1ATW2;0A0YK;0UNAG	schlafen 9 [Source:MGI Symbol;Acc:MGI:2445121]	237886	B1ARD6
ENSMUSG00000024457	3058.9	1118.42	4999.39	4.47004	2.16029	4.49273e-28	1.0826e-26	17	37148026	37170290	+	6868	Trim26	GO:0008270;GO:0045087;GO:0046597;GO:0046872;GO:0051091;GO:1902187;GO:0002376;GO:0005634;GO:0005737;GO:0005737;GO:0005737;GO:0008270;GO:0010468;GO:0016567;GO:0016740;GO:0045087;GO:0045087;GO:0045087;GO:0046597;GO:0046872;GO:0051091;GO:0051091;GO:0061630;GO:1902187;GO:0002376;GO:0005634;GO:0005737;GO:0005737;GO:0005737;GO:0008270;GO:0010468;GO:0016567;GO:0016740;GO:0045087;GO:0045087;GO:0045087;GO:…	K12008	-	O	KOG2177;0WIZF;197FJ;0E9EK;1BBG6;0B69M;1DG9W;0V3T5;13FXH	tripartite motif-containing 26 [Source:MGI Symbol;Acc:MGI:1337056]	22670	Q99PN3
ENSMUSG00000040751	1230.57	2017.3	443.848	0.220021	-2.18429	5.6682e-28	1.36365e-26	5	134628876	134643879	-	2621	Lat2	GO:0002250;GO:0002376;GO:0002764;GO:0005886;GO:0005886;GO:0005886;GO:0016020;GO:0016021;GO:0019722;GO:0019722;GO:0019722;GO:0035556;GO:0035556;GO:0042113;GO:0042113;GO:0042113;GO:0042113;GO:0042169;GO:0042169;GO:0043303;GO:0045121;GO:0045121;GO:0050853;GO:0050853;GO:0050853;GO:0002250;GO:0002376;GO:0002764;GO:0005886;GO:0005886;GO:0005886;GO:0016020;GO:0016021;GO:0019722;GO:0019722;GO:0019722;GO:…	-	-	W;T	13SP3;1D35N;0VHNR;0IZVX;1968H;0DTTG;0A6UM;1AWVZ;0UV64	linker for activation of T cells family, member 2 [Source:MGI Symbol;Acc:MGI:1926479]	56743	Q9JHL0
ENSMUSG00000033220	9126.7	3745.33	14508.1	3.87364	1.95369	6.70591e-28	1.61071e-26	15	78443367	78456983	-	3103	Rac2	GO:0000166;GO:0003924;GO:0003924;GO:0003924;GO:0005525;GO:0005525;GO:0005525;GO:0005525;GO:0005525;GO:0005635;GO:0005737;GO:0005737;GO:0005829;GO:0005829;GO:0005856;GO:0005884;GO:0005884;GO:0005886;GO:0005938;GO:0006935;GO:0007015;GO:0007015;GO:0007015;GO:0007163;GO:0007186;GO:0007264;GO:0008045;GO:0008284;GO:0008360;GO:0010592;GO:0010592;GO:0010592;GO:0010810;GO:0010810;GO:0016020;GO:0016020;GO:…	K07860	-	Z;S;T	0V62F;1CTM0;0DIVP;09V2T;18Z63;0UNQQ;1AY79;KOG0393;12N5X	Rac family small GTPase 2 [Source:MGI Symbol;Acc:MGI:97846]	19354	Q05144
ENSMUSG00000039804	1835.4	714.776	2956.03	4.13559	2.04809	7.36718e-28	1.76671e-26	2	164842277	164876787	-	4383	Ncoa5	GO:0003682;GO:0005634;GO:0005654;GO:0005654;GO:0015629;GO:0015629;GO:0042593;GO:0046627;	-	-	K;Y;U	1B444;0UTNF;0DPJQ;18YDV;0A17B;13JZR;1CYB3;0VDZ5;KOG0845	nuclear receptor coactivator 5 [Source:MGI Symbol;Acc:MGI:2385165]	228869	Q91W39
ENSMUSG00000024620	466.241	43.0559	889.426	20.6575	4.36859	7.39451e-28	1.77042e-26	18	61178222	61218133	+	5478	Pdgfrb	GO:0000166;GO:0001568;GO:0001701;GO:0001726;GO:0001822;GO:0001894;GO:0004672;GO:0004713;GO:0004713;GO:0004713;GO:0004714;GO:0004714;GO:0004714;GO:0005017;GO:0005019;GO:0005019;GO:0005019;GO:0005019;GO:0005102;GO:0005102;GO:0005161;GO:0005515;GO:0005515;GO:0005524;GO:0005524;GO:0005634;GO:0005634;GO:0005737;GO:0005737;GO:0005764;GO:0005794;GO:0005886;GO:0005886;GO:0005887;GO:0006024;GO:0006468;GO:…	K05089	EC:2.7.10.1	T	0V51R;1B1BK;1CTBA;09U2S;KOG0200;1923U;0URE7;0DMCR;12TBY	platelet derived growth factor receptor, beta polypeptide [Source:MGI Symbol;Acc:MGI:97531]	18596	P05622
ENSMUSG00000024778	121.685	12.3769	230.993	18.6633	4.22213	8.31559e-28	1.98777e-26	19	34268066	34305172	+	2062	Fas	GO:0001934;GO:0002020;GO:0004888;GO:0005031;GO:0005031;GO:0005515;GO:0005515;GO:0005515;GO:0005516;GO:0005516;GO:0005576;GO:0005615;GO:0005737;GO:0005829;GO:0005886;GO:0005886;GO:0006915;GO:0006915;GO:0006915;GO:0006924;GO:0006924;GO:0006925;GO:0006955;GO:0007165;GO:0007623;GO:0008625;GO:0008625;GO:0009636;GO:0009897;GO:0009897;GO:0009986;GO:0010467;GO:0010468;GO:0010626;GO:0010942;GO:0016020;GO:…	K04390	-	T	1CTQE;09XME;1B0GF;0J23A;0DIYZ;0V8J4;13V7I;0UMMC;192Y5	Fas (TNF receptor superfamily member 6) [Source:MGI Symbol;Acc:MGI:95484]	14102	P25446
ENSMUSG00000015745	1734.66	2797.08	672.23	0.240332	-2.0569	8.35789e-28	1.9947e-26	3	95895741	95903313	-	2172	Plekho1	GO:0005515;GO:0005634;GO:0005737;GO:0005886;GO:0007520;GO:0008360;GO:0016020;GO:0032587;GO:0036195;GO:0051451;GO:0072673;GO:0005634;GO:0005737;GO:0016020;GO:0005634;GO:0005737;GO:0016020;GO:0005634;GO:0005737;GO:0016020;	K24022	-	T	09YDK;18V1Y;0V9B6;1CUKK;13M6S;0IEJU;0DJTG;1AU17;0UINF	pleckstrin homology domain containing, family O member 1 [Source:MGI Symbol;Acc:MGI:1914470]	67220	Q9JIY0
ENSMUSG00000032413	745.451	254.31	1236.59	4.86254	2.28171	9.17322e-28	2.1858e-26	9	96421353	96513670	-	15856	Rasa2	GO:0005096;GO:0005096;GO:0005096;GO:0005096;GO:0005543;GO:0005886;GO:0007165;GO:0016020;GO:0035556;GO:0043087;GO:0043547;GO:0046580;GO:0046872;	K08053	-	T	1AU44;KOG2059;09WRB;0V7PR;18V1B;12R8D;1CSRM;0UKD9;0DI0X	RAS p21 protein activator 2 [Source:MGI Symbol;Acc:MGI:2149960]	114713	P58069
ENSMUSG00000037921	2116.45	132.04	4100.87	31.0579	4.95689	9.24601e-28	2.19964e-26	8	62381121	62491278	+	8684	Ddx60	GO:0003690;GO:0003723;GO:0003725;GO:0003727;GO:0005515;GO:0005737;GO:0005829;GO:0009615;GO:0045111;GO:0051607;GO:1900245;GO:1900246;GO:0003690;GO:0003723;GO:0003725;GO:0003727;GO:0005515;GO:0005737;GO:0005829;GO:0009615;GO:0045111;GO:0051607;GO:1900245;GO:1900246;GO:0000166;GO:0003676;GO:0003690;GO:0003723;GO:0003725;GO:0003727;GO:0005515;GO:0005524;GO:0005524;GO:0005737;GO:0005829;GO:0009615;GO:…	K20103	EC:3.6.4.13	A	KOG0949;KOG0948;0UMKZ;1AX3N;0A0C4;12SQZ;0DIYN;0V75Y;18XMV;1CTQ4	DExD/H box helicase 60 [Source:MGI Symbol;Acc:MGI:2384570]	234311	G3X9F7
ENSMUSG00000013707	765.66	1272.7	258.621	0.203207	-2.29898	9.61303e-28	2.28332e-26	3	95046832	95049671	-	1122	Tnfaip8l2	GO:0002376;GO:0005515;GO:0005737;GO:0005737;GO:0042981;GO:0045087;GO:0050728;GO:0050728;GO:0050868;GO:0050868;	-	-	T	0IGTQ;0DN5T;1ASFU;0VBEW;0UGRS;18SKZ;1CX2B;12SWJ;0A0IR	tumor necrosis factor, alpha-induced protein 8-like 2 [Source:MGI Symbol;Acc:MGI:1917019]	69769	Q9D8Y7
ENSMUSG00000037965	5009.72	1525.21	8494.23	5.56922	2.47747	9.83342e-28	2.33197e-26	16	10954456	10994257	-	9160	Zc3h7a	GO:0005575;GO:0010608;GO:0010608;GO:0035196;GO:0035196;GO:0035196;GO:0035198;GO:0035198;GO:0035198;GO:0035198;GO:0046872;GO:0046872;GO:0005575;GO:0010608;GO:0035196;GO:0035196;GO:0035198;GO:0035198;GO:0035198;GO:0046872;GO:0046872;GO:0005575;GO:0010608;GO:0035196;GO:0035196;GO:0035198;GO:0035198;GO:0035198;GO:0005575;GO:0010608;GO:0035196;GO:0035196;GO:0035198;GO:0035198;GO:0035198;GO:0046872;GO:…	-	-	S	0V65D;13JTB;0DGET;0IDY2;1AYKT;18W97;0UI71;1CR4B;09V5T	zinc finger CCCH type containing 7 A [Source:MGI Symbol;Acc:MGI:2445044]	106205	Q3UBH9
ENSMUSG00000032578	63.7353	0.39094	127.08	325.062	8.34457	1.02207e-27	2.41999e-26	9	107173225	107179983	+	6419	Cish	GO:0005515;GO:0005515;GO:0005886;GO:0005942;GO:0007205;GO:0009968;GO:0016567;GO:0035556;GO:0040008;GO:0043551;GO:0046854;GO:0046935;	K04701	-	T	0UN85;0A26G;1B27Q;KOG4566;1CYTU;18XAM;0DPUM;13MTV;0VD22	cytokine inducible SH2-containing protein [Source:MGI Symbol;Acc:MGI:103159]	12700	Q62225;Q8C3F4
ENSMUSG00000060860	1220.68	454.871	1986.5	4.36716	2.1267	1.02709e-27	2.42802e-26	7	4797545	4815589	-	5141	Ube2s	GO:0000166;GO:0005524;GO:0016740;GO:0000166;GO:0000209;GO:0004842;GO:0004842;GO:0005524;GO:0005634;GO:0005680;GO:0005680;GO:0006511;GO:0007049;GO:0010458;GO:0010458;GO:0010994;GO:0010994;GO:0010997;GO:0016567;GO:0016740;GO:0031145;GO:0031145;GO:0035519;GO:0035519;GO:0044314;GO:0044314;GO:0051301;GO:0061631;GO:0061631;GO:0061631;GO:0070534;GO:0070534;GO:0070979;GO:0070979;GO:0085020;GO:0085020;GO:…	K10583	EC:2.3.2.23	O	1CRZU;18TNA;0UJC8;0DH9W;1ATJW;13HZY;0VEYP;KOG0423;0A43T	ubiquitin-conjugating enzyme E2S [Source:MGI Symbol;Acc:MGI:1925141]	77891	Q921J4
ENSMUSG00000054517	193.074	355.919	30.2278	0.0849287	-3.5576	1.05705e-27	2.49413e-26	11	116012672	116021954	-	5883	Trim65	GO:0003674;GO:0005654;GO:0005829;GO:0008270;GO:0010508;GO:0010508;GO:0010508;GO:0046872;GO:0046872;GO:0003674;GO:0005654;GO:0005654;GO:0005829;GO:0005829;GO:0008270;GO:0010508;GO:0010508;GO:0010508;GO:0010508;GO:0046872;GO:0046872;	K12031	-	O	0WJ1I;0E9GD;1BBHR;1DGBM;13FZP;197GA;0ITG7;0B6BP;0V3UT	tripartite motif-containing 65 [Source:MGI Symbol;Acc:MGI:2442815]	338364	Q8BFW4;Q8BJT1
ENSMUSG00000062203	3292.58	1343.81	5241.35	3.90037	1.96361	1.05839e-27	2.49413e-26	16	11037156	11072189	-	5428	Gspt1	GO:0000166;GO:0000184;GO:0002184;GO:0003747;GO:0003747;GO:0003747;GO:0003924;GO:0003924;GO:0005525;GO:0005525;GO:0005829;GO:0006412;GO:0006412;GO:0006449;GO:0006449;GO:0006479;GO:0018444;GO:0000166;GO:0000184;GO:0002184;GO:0003747;GO:0003747;GO:0003747;GO:0003747;GO:0003924;GO:0003924;GO:0005525;GO:0005525;GO:0005829;GO:0006412;GO:0006412;GO:0006449;GO:0006449;GO:0006449;GO:0006479;GO:0006479;GO:…	K03267	-	J	1ASVT;0V584;09U8Z;0DFS7;1CQFS;0UH7I;12P6V;KOG0459	G1 to S phase transition 1 [Source:MGI Symbol;Acc:MGI:1316728]	14852	Q8R050
ENSMUSG00000031712	2677.65	172.951	5182.34	29.9643	4.90517	1.06228e-27	2.49937e-26	8	83058261	83129851	-	2261	Il15	GO:0001819;GO:0001866;GO:0005125;GO:0005125;GO:0005125;GO:0005126;GO:0005576;GO:0005576;GO:0005576;GO:0005615;GO:0005615;GO:0005615;GO:0005654;GO:0005737;GO:0005829;GO:0006955;GO:0007260;GO:0008284;GO:0009986;GO:0016607;GO:0030212;GO:0030225;GO:0032740;GO:0032819;GO:0032825;GO:0035723;GO:0035723;GO:0042102;GO:0042102;GO:0042119;GO:0042119;GO:0042119;GO:0042531;GO:0042531;GO:0045062;GO:0045580;GO:…	K05433	-	T	1B5FR;13TC2;0IZ5D;0VHGD;0DTMY;193GD;0UUZ6;0A6N7;1D2ZH	interleukin 15 [Source:MGI Symbol;Acc:MGI:103014]	16168	P48346;Q3U1Z6
ENSMUSG00000036086	386.961	678.485	95.4365	0.140661	-2.8297	1.17188e-27	2.75291e-26	1	127881921	128030784	-	9079	Zranb3	GO:0000166;GO:0000733;GO:0003676;GO:0003678;GO:0003824;GO:0004386;GO:0004518;GO:0004519;GO:0004519;GO:0004520;GO:0004520;GO:0004520;GO:0005524;GO:0005524;GO:0005634;GO:0005654;GO:0005694;GO:0006281;GO:0006281;GO:0006281;GO:0006974;GO:0006974;GO:0008152;GO:0009411;GO:0009411;GO:0016787;GO:0031297;GO:0031297;GO:0031297;GO:0032508;GO:0036292;GO:0036292;GO:0036292;GO:0036310;GO:0036310;GO:0036310;GO:…	-	-	B	KOG1000;0V6TY;0DJ75;1CTZ3;18W8D;09VV8;1AS2S;12QRK;0UPUH	zinc finger, RAN-binding domain containing 3 [Source:MGI Symbol;Acc:MGI:1918362]	226409	Q6NZP1;Q8BUI4
ENSMUSG00000062604	595.252	1002.13	188.378	0.187978	-2.41136	1.58061e-27	3.70725e-26	5	23708262	23889615	-	13901	Srpk2	GO:0000166;GO:0000245;GO:0000287;GO:0000785;GO:0004672;GO:0004674;GO:0005524;GO:0005524;GO:0005524;GO:0005634;GO:0005654;GO:0005730;GO:0005737;GO:0005829;GO:0006468;GO:0006468;GO:0008284;GO:0008380;GO:0016607;GO:0018105;GO:0035556;GO:0045070;GO:0045071;GO:0062176;GO:0004672;GO:0005524;GO:0006468;GO:0004672;GO:0005524;GO:0006468;GO:0004672;GO:0005524;GO:0006468;	K08831	EC:2.7.11.1	T	KOG1290;18SQN;12N4I;09UCH;0DFN4;1CQBP;1AWK1;0USZG;0V5BR	serine/arginine-rich protein specific kinase 2 [Source:MGI Symbol;Acc:MGI:1201408]	20817	O54781;Q8CBI1;A0A0R4J124
ENSMUSG00000024014	6396.57	694.391	12098.7	17.4235	4.12297	1.66707e-27	3.90391e-26	17	29709727	29715086	+	3362	Pim1	GO:0000166;GO:0004672;GO:0004674;GO:0004674;GO:0004674;GO:0004674;GO:0004674;GO:0005515;GO:0005524;GO:0005524;GO:0005524;GO:0005524;GO:0005634;GO:0005634;GO:0005634;GO:0005730;GO:0005730;GO:0005737;GO:0005737;GO:0005737;GO:0005737;GO:0005829;GO:0005829;GO:0005886;GO:0005886;GO:0006468;GO:0006468;GO:0006468;GO:0006468;GO:0006915;GO:0007049;GO:0008134;GO:0008134;GO:0016020;GO:0016301;GO:0016310;GO:…	K04702	EC:2.7.11.1	T;B	KOG0583;09THD;0UFXZ;1ATEZ;0DEU7;0V4GC;1958A;12UDI;1CPHY	proviral integration site 1 [Source:MGI Symbol;Acc:MGI:97584]	18712	P06803
ENSMUSG00000045404	795.966	1318.8	273.129	0.207104	-2.27158	1.77324e-27	4.14605e-26	12	99930758	100028941	+	3112	Kcnk13	GO:0005244;GO:0005267;GO:0005267;GO:0005887;GO:0006811;GO:0006813;GO:0016020;GO:0016020;GO:0016021;GO:0016021;GO:0022841;GO:0030322;GO:0034765;GO:0071805;GO:0071805;GO:0071805;GO:0005244;GO:0005267;GO:0005267;GO:0005887;GO:0006811;GO:0006813;GO:0016020;GO:0016020;GO:0016021;GO:0016021;GO:0022841;GO:0030322;GO:0034765;GO:0071805;GO:0071805;GO:0071805;GO:0005244;GO:0005267;GO:0005267;GO:0005887;GO:…	K04922	-	P	0DH2Y;18TAJ;12Y19;0UJ3Y;1CRT7;09VUR;0V6TE;KOG4404;1AUKZ	potassium channel, subfamily K, member 13 [Source:MGI Symbol;Acc:MGI:2384976]	217826	Q8R1P5;Q3TYG8
ENSMUSG00000047604	85.8455	170.369	1.3219	0.00775905	-7.0099	1.86141e-27	4.34543e-26	19	41834411	41836571	-	2161	Frat2	GO:0003674;GO:0005737;GO:0016055;	K03096	-	T	0A791;13Z49;0UUZK;1AT2X;0VI5G;196DR;0J5HI;1D37W;0DU5A	frequently rearranged in advanced T cell lymphomas 2 [Source:MGI Symbol;Acc:MGI:2673967]	212398	Q8K025
ENSMUSG00000042396	4557.36	1506.02	7608.7	5.0522	2.33691	1.88454e-27	4.39255e-26	9	48400001	48406599	-	4941	Rbm7	GO:0003676;GO:0003723;GO:0000381;GO:0003676;GO:0003723;GO:0003723;GO:0003727;GO:0005515;GO:0005634;GO:0005634;GO:0005634;GO:0005654;GO:0005654;GO:0016076;GO:0017069;GO:0051321;GO:0071889;GO:0071889;GO:0097157;GO:0003676;	K13188	-	S	1B2CH;0DQ1U;1CZ2I;KOG4454;18YA2;0UME0;0A2ES;13WPK;0VDAE	RNA binding motif protein 7 [Source:MGI Symbol;Acc:MGI:1914260]	67010	Q9CQT2;Q14A95
ENSMUSG00000026112	4682.7	1955.61	7409.79	3.78899	1.92181	2.05686e-27	4.78676e-26	1	37456165	37469184	-	5220	Coa5	GO:0003674;GO:0005739;GO:0005739;GO:0033617;	K18178	-	O	0VK8G;0DVJZ;1D4WD;0UWBI;193VP;0A9DN;KOG4114;13X42;1B6M1	cytochrome C oxidase assembly factor 5 [Source:MGI Symbol;Acc:MGI:1923428]	76178	Q99M07
ENSMUSG00000023990	595.036	1001.02	189.05	0.188856	-2.40464	2.18906e-27	5.08649e-26	17	48047955	48103344	+	5669	Tfeb	GO:0000976;GO:0000976;GO:0000978;GO:0000978;GO:0000981;GO:0001228;GO:0001892;GO:0002250;GO:0002376;GO:0003677;GO:0003677;GO:0003700;GO:0003700;GO:0005634;GO:0005634;GO:0005634;GO:0005667;GO:0005737;GO:0005737;GO:0005764;GO:0005765;GO:0005765;GO:0005829;GO:0005829;GO:0006355;GO:0006357;GO:0006914;GO:0006959;GO:0006959;GO:0007040;GO:0007040;GO:0009267;GO:0009267;GO:0010468;GO:0010508;GO:0010508;GO:…	K15590	-	K	0V6YD;09VZY;1B03M;0UJB7;1CRYZ;12PKT;KOG1318;0DH90	transcription factor EB [Source:MGI Symbol;Acc:MGI:103270]	21425	Q9R210;Q6P203;Q8C5F1
ENSMUSG00000039531	1904.98	256.101	3553.87	13.8768	3.79461	2.4443e-27	5.67078e-26	10	33795138	33827265	-	9072	Zup1	GO:0004843;GO:0005634;GO:0005634;GO:0005737;GO:0006508;GO:0010468;GO:0016787;GO:0018215;GO:0046872;GO:0004843;GO:0005634;GO:0005634;GO:0005737;GO:0006508;GO:0010468;GO:0016787;GO:0018215;GO:0046872;GO:0004843;GO:0006508;GO:0018215;GO:0004843;GO:0005634;GO:0005634;GO:0005737;GO:0006508;GO:0010468;GO:0016787;GO:0018215;GO:0046872;GO:0004843;GO:0005634;GO:0005634;GO:0005737;GO:0006508;GO:0010468;GO:…	K24134	EC:3.4.19.12	S;J	1AUZ3;18YT7;0DJ59;0V8QT;09XT6;12TWJ;0UU14;1CTX4;KOG4696	zinc finger containing ubiquitin peptidase 1 [Source:MGI Symbol;Acc:MGI:1919830]	72580	Q3T9Z9
ENSMUSG00000061458	575.503	185.747	965.26	5.19664	2.37758	2.47195e-27	5.72606e-26	12	17398459	17480096	+	3021	Nol10	GO:0000462;GO:0005634;GO:0005634;GO:0005730;GO:0005730;GO:0005730;GO:0005730;GO:0032040;	K14788	-	S;K	1CXX9;0UGVF;1ASJ3;0A2V1;192C1;12RP0;0DNZR;KOG2321;0VE1K	nucleolar protein 10 [Source:MGI Symbol;Acc:MGI:2684913]	217431	Q5RJG1;Q3TUB5
ENSMUSG00000067297	152.248	1.92194	302.575	157.432	7.29859	2.48308e-27	5.74293e-26	19	34594449	34618143	-	3367	Ifit1bl2	GO:0003723;GO:0003723;GO:0005737;GO:0005737;GO:0005829;GO:0005829;GO:0009615;GO:0050688;GO:0051607;GO:0071357;GO:0071360;	K14217	-	S;P	0DNWM;0A0WM;1CXU0;13I8N;0V5W7;KOG1124	interferon induced protein with tetratricopeptide repeats 1B like 2 [Source:MGI Symbol;Acc:MGI:2148249]	112419	-
ENSMUSG00000028538	1238.68	180.667	2296.68	12.7123	3.66815	2.49656e-27	5.7652e-26	4	117789351	117992111	-	2768	St3gal3	GO:0003836;GO:0005794;GO:0006486;GO:0006486;GO:0006486;GO:0006486;GO:0008118;GO:0008373;GO:0008373;GO:0010706;GO:0016020;GO:0016021;GO:0016740;GO:0016757;GO:0032580;GO:0097503;GO:0003836;GO:0005794;GO:0006486;GO:0006486;GO:0006486;GO:0006486;GO:0008118;GO:0008373;GO:0008373;GO:0010706;GO:0016020;GO:0016021;GO:0016740;GO:0016757;GO:0032580;GO:0097503;GO:0005794;GO:0006486;GO:0008373;GO:0016020;GO:…	K00781	EC:2.4.99.6	G	0UI7D;0V65H;0DGEX;13HQF;09V5Y;18YIW;KOG2692;1CR4H;1ATSG	ST3 beta-galactoside alpha-2,3-sialyltransferase 3 [Source:MGI Symbol;Acc:MGI:1316659]	20441	P97325;Q9CZ48
ENSMUSG00000050565	9282.82	2485.54	16080.1	6.46945	2.69364	2.74879e-27	6.33789e-26	1	155911149	155944607	+	9218	Tor1aip2	GO:0001671;GO:0001671;GO:0001671;GO:0005515;GO:0005634;GO:0005635;GO:0005783;GO:0005783;GO:0005783;GO:0005789;GO:0007029;GO:0007029;GO:0007029;GO:0016020;GO:0016021;GO:0032781;GO:0032781;GO:0032781;GO:0051117;GO:0051117;GO:0090435;GO:0090435;GO:0001671;GO:0005515;GO:0005783;GO:0007029;GO:0032781;GO:0051117;GO:0090435;GO:0001671;GO:0005515;GO:0005783;GO:0007029;GO:0032781;GO:0051117;GO:0090435;GO:…	K11794	-	S;U	18W26;0IJUB;0UM0S;0V845;1CT7B;13NQE;0A10Q;1AWGU;0DNN8;0A6MG;1D2YU;0VHFM;0UUY8;0IWR7;192WK;0DTMB;13QR1;1B5JD	torsin A interacting protein 2 [Source:MGI Symbol;Acc:MGI:3582695]	240832	Q9ER81
ENSMUSG00000073910	310.191	78.6576	541.725	6.88712	2.7839	2.82177e-27	6.49615e-26	4	34949074	35157484	-	6200	Mob3b	GO:0003674;GO:0005575;GO:0035330;GO:0035330;GO:0046872;	-	-	D	1947T;12Q3F;1CR3B;0DGDT;1AYFG;0UI56;KOG1903;0V64B;09V4P	MOB kinase activator 3B [Source:MGI Symbol;Acc:MGI:2664539]	214944	Q8VE04
ENSMUSG00000073490	6294.2	2386.45	10202	4.27496	2.09591	3.07286e-27	7.06334e-26	1	173550993	173569313	-	3422	Ifi207	GO:0000122;GO:0000978;GO:0001227;GO:0002218;GO:0003690;GO:0003690;GO:0005634;GO:0005654;GO:0005730;GO:0005829;GO:0008134;GO:0035458;GO:0035458;GO:0042802;GO:0000122;GO:0000978;GO:0001227;GO:0002218;GO:0003690;GO:0003690;GO:0005634;GO:0005654;GO:0005730;GO:0005829;GO:0008134;GO:0035458;GO:0035458;GO:0042802;	K20914	-	K	1CTDT;0UM8D;0DINX;0J5NP;194Q0;1B2J8;1408X;0V89T;09XBF	interferon activated gene 207 [Source:MGI Symbol;Acc:MGI:2138302]	226691	E9Q3L4;Q8BW36
ENSMUSG00000022346	608.154	198.569	1017.74	5.12536	2.35765	3.20352e-27	7.35237e-26	15	61857240	61862223	+	2717	Myc	GO:0000122;GO:0000165;GO:0000165;GO:0000320;GO:0000785;GO:0000785;GO:0000791;GO:0000978;GO:0000978;GO:0000981;GO:0000981;GO:0000981;GO:0000987;GO:0001046;GO:0001227;GO:0001228;GO:0001658;GO:0001783;GO:0002053;GO:0002082;GO:0002904;GO:0003677;GO:0003677;GO:0003690;GO:0003700;GO:0003700;GO:0003700;GO:0005515;GO:0005515;GO:0005515;GO:0005634;GO:0005634;GO:0005654;GO:0005654;GO:0005730;GO:0005730;GO:…	K04377	-	K	0VABW;18XVH;09ZEU;12RYD;1AWEN;0DKX3;0UKYJ;1CVSB;0IFSM	myelocytomatosis oncogene [Source:MGI Symbol;Acc:MGI:97250]	17869	P01108;B2RSN1
ENSMUSG00000031586	567.105	123.631	1010.58	8.17415	3.03107	3.2914e-27	7.54249e-26	8	34272671	34419891	-	6556	Rbpms	GO:0000932;GO:0003676;GO:0003713;GO:0003713;GO:0003723;GO:0003723;GO:0003729;GO:0005634;GO:0005654;GO:0005737;GO:0005829;GO:0006979;GO:0006979;GO:0008143;GO:0008143;GO:0010494;GO:0010494;GO:0010862;GO:0010862;GO:0042803;GO:0045893;GO:0060391;GO:0060391;GO:0000932;GO:0003676;GO:0003713;GO:0003713;GO:0003723;GO:0003723;GO:0003729;GO:0005634;GO:0005654;GO:0005737;GO:0005829;GO:0006979;GO:0006979;GO:…	-	-	A;K	0DNY7;1CXVP;0USA9;13HCP;KOG1457;1950Z;0A1AK;1AXYP;0VC6A	RNA binding protein gene with multiple splicing [Source:MGI Symbol;Acc:MGI:1334446]	19663	Q9WVB0
ENSMUSG00000051413	4850.81	1029.61	8672.02	8.42261	3.07427	3.99798e-27	9.14768e-26	2	153069679	153083346	-	5735	Plagl2	GO:0000981;GO:0001228;GO:0005634;GO:0005634;GO:0006351;GO:0006357;GO:0006629;GO:0009791;GO:0034378;GO:0043565;GO:0043565;GO:0045944;GO:2001244;GO:0000981;GO:0001228;GO:0001228;GO:0005634;GO:0005634;GO:0006351;GO:0006357;GO:0006629;GO:0009791;GO:0034378;GO:0043565;GO:0043565;GO:0043565;GO:0045944;GO:2001244;	K19486	-	K	0V4UC;09TV4;13M37;KOG1721;0UI01;1AUWF;0DGA0;18ZYB;1CQZE	pleiomorphic adenoma gene-like 2 [Source:MGI Symbol;Acc:MGI:1933165]	54711	Q925T4
ENSMUSG00000040782	3649.21	1096.57	6201.86	5.65571	2.49971	4.19563e-27	9.58524e-26	1	159059890	159175210	+	17516	Cop1	GO:0016567;GO:0061630;GO:0000139;GO:0000139;GO:0005515;GO:0005515;GO:0005634;GO:0005737;GO:0010212;GO:0010212;GO:0016567;GO:0016607;GO:0016740;GO:0031464;GO:0031464;GO:0032436;GO:0032436;GO:0043161;GO:0043161;GO:0046872;GO:0061630;GO:0061630;GO:0061630;GO:0016567;GO:0046872;GO:0061630;GO:0016567;GO:0061630;GO:0016567;GO:0061630;GO:0016567;GO:0061630;	K10143	EC:2.3.2.27	O	0V58W;1CQ95;12NMJ;1AVAX;09U9Q;18U0U;0DFJE;0IE71;0UJTZ	COP1, E3 ubiquitin ligase [Source:MGI Symbol;Acc:MGI:1347046]	26374	Q9R1A8
ENSMUSG00000031925	811.737	288.086	1335.39	4.63539	2.21269	5.35668e-27	1.22191e-25	9	13298306	13620684	+	6598	Maml2	GO:0003713;GO:0003713;GO:0003713;GO:0003713;GO:0005634;GO:0005634;GO:0005634;GO:0005654;GO:0007219;GO:0007219;GO:0007221;GO:0016607;GO:0045944;GO:0045944;GO:0045944;GO:0003713;GO:0003713;GO:0005634;GO:0005654;GO:0007221;GO:0045944;GO:0003713;GO:0003713;GO:0005634;GO:0005654;GO:0007221;GO:0045944;	K06061	-	K	0E6VJ;0W2C7;1DDSV;0B1RG;0JA0Q;143R6;0V1ZC	mastermind like transcriptional coactivator 2 [Source:MGI Symbol;Acc:MGI:2389460]	270118	F6U238;Q8BYF1
ENSMUSG00000022661	1278.28	423.543	2133.01	5.03612	2.33231	6.03392e-27	1.3743e-25	16	45202498	45229416	-	3321	Cd200	GO:0009986;GO:0016020;GO:0016021;GO:0030424;GO:0032088;GO:0032793;GO:0034113;GO:0043025;GO:0043031;GO:0044297;GO:0050776;GO:0071636;GO:0150072;GO:0150074;GO:1904465;GO:0016020;GO:0016021;GO:0043031;GO:0050776;GO:0043031;GO:0050776;GO:0043031;GO:0050776;	K06556	-	S	0DR29;1D073;190IW;0IWZ9;13QF0;0UU4R;0VFBK;0A3JD;1B0Y7	CD200 antigen [Source:MGI Symbol;Acc:MGI:1196990]	17470	-
ENSMUSG00000022094	3170.54	218.704	6122.37	27.9939	4.80704	6.35109e-27	1.44434e-25	14	70540918	70588874	-	10550	Slc39a14	GO:0002062;GO:0005381;GO:0005384;GO:0005384;GO:0005384;GO:0005385;GO:0005385;GO:0005385;GO:0005385;GO:0005764;GO:0005765;GO:0005765;GO:0005765;GO:0005768;GO:0005886;GO:0005886;GO:0005886;GO:0005887;GO:0005887;GO:0005887;GO:0005887;GO:0006094;GO:0006811;GO:0006826;GO:0006829;GO:0006829;GO:0006882;GO:0006882;GO:0006882;GO:0006882;GO:0008286;GO:0010817;GO:0015086;GO:0015093;GO:0015296;GO:0015698;GO:…	K14720	-	P	18V2K;1CSVC;0V7SX;12QZZ;0UKHT;0DI4Y;09WUZ;1B2IP;KOG2693	solute carrier family 39 (zinc transporter), member 14 [Source:MGI Symbol;Acc:MGI:2384851]	213053	Q75N73
ENSMUSG00000029007	2026.09	816.646	3235.53	3.96197	1.98622	6.54933e-27	1.48717e-25	4	148161518	148172488	-	4236	Agtrap	GO:0000139;GO:0001666;GO:0004945;GO:0005515;GO:0005654;GO:0005783;GO:0005789;GO:0005794;GO:0005794;GO:0005829;GO:0005886;GO:0005886;GO:0005938;GO:0008217;GO:0008217;GO:0016020;GO:0016021;GO:0030659;GO:0031410;GO:0038166;GO:0042802;GO:0043231;GO:0043231;	-	-	T	1D2NB;0IYP8;13T43;0A7DF;0DU6X;1B1M8;0VI4N;193BH;0UN3F	angiotensin II, type I receptor-associated protein [Source:MGI Symbol;Acc:MGI:1339977]	11610	Q9WVK0
ENSMUSG00000032000	4937.59	429.886	9445.29	21.9716	4.45757	6.69896e-27	1.51884e-25	9	7848700	7873187	-	5009	Birc3	GO:0005634;GO:0005737;GO:0007283;GO:0032991;GO:0042981;GO:0044877;GO:0045121;GO:0046872;GO:0005737;	K16060	-	O;T;D	09XU3;13HTW;KOG1101;1AXBT;0DJ69;0UH8Q;0V8RR;1CTY4;194HC	baculoviral IAP repeat-containing 3 [Source:MGI Symbol;Acc:MGI:1197007]	11796	O08863;A2CGA5;Q3TSE5
ENSMUSG00000061540	242.238	54.1004	430.376	7.95513	2.99188	7.53075e-27	1.70484e-25	4	63280686	63284115	+	775	Orm2	GO:0002682;GO:0005576;GO:0005615;GO:0005615;GO:0006953;	K17308	-	W;G	0A6MS;0VHFW;13QCS;0IWZI;1ATJ1;0DSRG;0UP4B;193FT;1D3GW	orosomucoid 2 [Source:MGI Symbol;Acc:MGI:97444]	18406	P07361
ENSMUSG00000023991	1387.44	195.324	2579.55	13.2065	3.72318	7.90168e-27	1.78611e-25	17	48178058	48235570	-	4926	Foxp4	GO:0000122;GO:0000122;GO:0000122;GO:0000978;GO:0000978;GO:0000981;GO:0001227;GO:0001227;GO:0003677;GO:0003677;GO:0003700;GO:0005515;GO:0005634;GO:0005634;GO:0006355;GO:0006357;GO:0007507;GO:0042802;GO:0043565;GO:0046872;GO:0048617;GO:0061140;GO:1901249;GO:1901250;GO:0003677;GO:0003700;GO:0005634;GO:0006355;GO:0043565;GO:0046872;GO:0003677;GO:0003700;GO:0005634;GO:0006355;GO:0043565;GO:0046872;GO:…	K09409	-	K	0UP7A;12PAE;09U0J;0DFAA;1CWDM;1ARMR;0V4ZA;KOG4385;18SD5	forkhead box P4 [Source:MGI Symbol;Acc:MGI:1921373]	74123	Q9DBY0;A0A0R4J161
ENSMUSG00000070462	2760.46	1139.19	4381.73	3.84636	1.9435	8.10802e-27	1.82999e-25	7	83529081	83533513	-	4433	Tlnrd1	GO:0001725;GO:0003779;GO:0003779;GO:0003779;GO:0008150;GO:0042802;GO:0042802;	-	-	Z	12STT;1CWYX;KOG4261;0UTVV;0A0FM;0VBBR;18YR3;1B2PR;0DMJP	talin rod domain containing 1 [Source:MGI Symbol;Acc:MGI:1891420]	80889	Q9ERE8
ENSMUSG00000024975	113.95	220.012	7.88742	0.0358499	-4.80189	1.15458e-26	2.60199e-25	19	53880662	53918291	+	3135	Pdcd4	GO:0003723;GO:0005515;GO:0005515;GO:0005634;GO:0005634;GO:0005634;GO:0005634;GO:0005634;GO:0005737;GO:0005737;GO:0005737;GO:0005829;GO:0005829;GO:0005829;GO:0005829;GO:0006915;GO:0007569;GO:0007569;GO:0007569;GO:0030509;GO:0030509;GO:0034393;GO:0034393;GO:0043066;GO:0043066;GO:0043508;GO:0045892;GO:0045892;GO:0045892;GO:0045892;GO:0050729;GO:0051246;GO:0051246;GO:0060940;GO:0060940;GO:0071222;GO:…	K16865	-	T;K	1CS6A;0UN6S;KOG0403;1AXPR;0A1C7;1927R;0VC7S;0DHG5;12PFH	programmed cell death 4 [Source:MGI Symbol;Acc:MGI:107490]	18569	Q61823
ENSMUSG00000060261	852.356	1400.35	304.359	0.217344	-2.20195	1.18204e-26	2.65986e-25	5	134266688	134343614	-	10199	Gtf2i	GO:0001102;GO:0001228;GO:0003677;GO:0003700;GO:0005515;GO:0005634;GO:0005634;GO:0005634;GO:0005654;GO:0005737;GO:0006355;GO:0006366;GO:0016525;GO:0042995;GO:0043025;GO:0045944;GO:0051481;GO:0051481;GO:0100026;GO:0001102;GO:0001228;GO:0003677;GO:0003700;GO:0005515;GO:0005634;GO:0005634;GO:0005634;GO:0005654;GO:0005737;GO:0006355;GO:0006366;GO:0016525;GO:0045944;GO:0051481;GO:0100026;GO:0001102;GO:…	K03121	-	K	1AW4N;0IEPZ;0V6UM;12PIF;18WMV;09VVZ;0DH43;1CRUB;0UTGG	general transcription factor II I [Source:MGI Symbol;Acc:MGI:1202722]	14886	Q9ESZ8
ENSMUSG00000023055	667.645	1110.75	224.543	0.202155	-2.30647	1.22167e-26	2.74491e-25	15	102615212	102630613	-	5731	Calcoco1	GO:0000785;GO:0000785;GO:0000976;GO:0000976;GO:0000978;GO:0000978;GO:0000978;GO:0003682;GO:0003712;GO:0003712;GO:0003713;GO:0003713;GO:0003713;GO:0003713;GO:0003713;GO:0005515;GO:0005515;GO:0005515;GO:0005634;GO:0005634;GO:0005634;GO:0005634;GO:0005737;GO:0005829;GO:0005829;GO:0007165;GO:0008013;GO:0008013;GO:0008022;GO:0008022;GO:0010628;GO:0010628;GO:0016055;GO:0030374;GO:0030374;GO:0030518;GO:…	-	-	K	0V5ZN;09UZW;0DG9B;18UAT;1ATIJ;1CQWS;0IHKH;0UHYY;13J3Y	calcium binding and coiled coil domain 1 [Source:MGI Symbol;Acc:MGI:1914738]	67488	Q8CGU1
ENSMUSG00000064120	1638.13	650.579	2625.69	4.03592	2.0129	1.53845e-26	3.45147e-25	17	49735390	49762463	+	3110	Mocs1	GO:0003824;GO:0046872;GO:0046872;GO:0051536;GO:0051536;GO:0051539;GO:0000166;GO:0003824;GO:0005525;GO:0006777;GO:0006777;GO:0016829;GO:0019008;GO:0032324;GO:0046872;GO:0046872;GO:0051536;GO:0051536;GO:0051539;GO:0051539;GO:0061798;GO:0061798;GO:0061799;GO:0061799;GO:0000166;GO:0003824;GO:0005525;GO:0005829;GO:0006777;GO:0006777;GO:0006777;GO:0016829;GO:0019008;GO:0032324;GO:0046872;GO:0046872;GO:…	K20967	-	H	KOG2876;18ZKZ;1AYPD;0V5R2;1CV10;0UM1P;12NWT;0DK75;09URK	molybdenum cofactor synthesis 1 [Source:MGI Symbol;Acc:MGI:1928904]	56738	Q5RKZ7
ENSMUSG00000001052	3544.7	1426.8	5662.6	3.96874	1.98868	1.58813e-26	3.5576e-25	3	129776408	129855202	-	6020	Sec24b	GO:0000139;GO:0000149;GO:0001843;GO:0002093;GO:0003151;GO:0005515;GO:0005789;GO:0005829;GO:0005829;GO:0005829;GO:0006886;GO:0006888;GO:0006888;GO:0006888;GO:0008270;GO:0008270;GO:0008270;GO:0008270;GO:0012507;GO:0015031;GO:0016020;GO:0021747;GO:0030127;GO:0030127;GO:0030127;GO:0030127;GO:0030134;GO:0030134;GO:0031410;GO:0035909;GO:0060088;GO:0060425;GO:0060463;GO:0060982;GO:0061156;GO:0070971;GO:…	K14007	-	U	09UWU;12NEV;1AU76;0DHBF;0UIPS;1CS1K;KOG1985;18VD7;0V5WN	Sec24 related gene family, member B (S. cerevisiae) [Source:MGI Symbol;Acc:MGI:2139764]	99683	Q80ZX0
ENSMUSG00000028937	721.83	251.759	1191.9	4.73429	2.24315	1.61376e-26	3.60961e-25	4	152262591	152356312	+	2124	Acot7	GO:0000062;GO:0005654;GO:0005654;GO:0005737;GO:0005737;GO:0005829;GO:0005829;GO:0005829;GO:0006629;GO:0006631;GO:0006631;GO:0006637;GO:0009062;GO:0015937;GO:0016290;GO:0016290;GO:0016290;GO:0016787;GO:0016790;GO:0036042;GO:0036042;GO:0036114;GO:0036116;GO:0042803;GO:0043005;GO:0044297;GO:0047617;GO:0047617;GO:0051792;GO:0052689;GO:0102991;GO:1900535;GO:1900535;GO:0000062;GO:0005654;GO:0005829;GO:…	K17360	EC:3.1.2.2	I	1CX8C;KOG2763;0DNBB;18X4E;1B06J;0A0Q0;13JVH;0VBK6;0UPHD	acyl-CoA thioesterase 7 [Source:MGI Symbol;Acc:MGI:1917275]	70025	Q91V12;E9PYH2
ENSMUSG00000078429	1430.81	2301.47	560.143	0.243385	-2.03869	1.80675e-26	4.03525e-25	10	126814586	126835844	+	5524	Ctdsp2	GO:0001933;GO:0004721;GO:0004721;GO:0004722;GO:0005575;GO:0005634;GO:0006470;GO:0006470;GO:0008420;GO:0008420;GO:0008420;GO:0008420;GO:0016787;GO:0016791;GO:0046872;GO:0106306;GO:0106307;GO:2000134;GO:0016311;GO:0016791;	K15731	EC:3.1.3.16	K	0DEFC;0UFD1;KOG1605;09V0Z;12Z69;1ARAB;18S09;1CP51;0V42X	CTD (carboxy-terminal domain, RNA polymerase II, polypeptide A) small phosphatase 2 [Source:MGI Symbol;Acc:MGI:1098748]	52468	Q8BX07
ENSMUSG00000024424	1297.82	187.147	2408.5	12.8696	3.68589	2.01549e-26	4.49474e-25	18	12732953	12871920	+	7234	Ttc39c	-	-	-	S;U	KOG3783;13G5Z;1DGEB;197H1;0V3WV;0B6FZ;0WJ6D;1BBJ9;0E9JA	tetratricopeptide repeat domain 39C [Source:MGI Symbol;Acc:MGI:1919997]	72747	Q8VE09;A0A3Q4EGC9;Q8BJQ0
ENSMUSG00000102037	2047.47	66.117	4028.82	60.9347	5.92919	2.0545e-26	4.57493e-25	9	88838953	88844472	+	819	Bcl2a1a	GO:0001782;GO:0002903;GO:0005515;GO:0005515;GO:0005737;GO:0005741;GO:0006915;GO:0008630;GO:0042803;GO:0042981;GO:0043066;GO:0043066;GO:0044877;GO:0046982;GO:0051400;GO:0097192;	K02162	-	T	192MA;1CPFD;0A0GW;0DERK;0UFS5;KOG4728;1ARKX;0V569;13S3B	B cell leukemia/lymphoma 2 related protein A1a [Source:MGI Symbol;Acc:MGI:102687]	12044	Q07440
ENSMUSG00000062232	5709.63	411.911	11007.4	26.7226	4.73999	2.05918e-26	4.57855e-25	3	78969823	79193824	-	14051	Rapgef2	GO:0001568;GO:0001764;GO:0005085;GO:0005085;GO:0005085;GO:0005096;GO:0005096;GO:0005096;GO:0005737;GO:0005737;GO:0005768;GO:0005770;GO:0005770;GO:0005829;GO:0005886;GO:0005886;GO:0005911;GO:0005923;GO:0007165;GO:0007186;GO:0007186;GO:0007218;GO:0007218;GO:0007264;GO:0007275;GO:0007399;GO:0008285;GO:0008285;GO:0010976;GO:0010976;GO:0016020;GO:0016020;GO:0016324;GO:0019901;GO:0019933;GO:0019933;GO:…	K08018	-	T	18VZI;1CTRA;0UM0J;0DIZW;1AX4T;0V5Q6;12NW8;09UQI;KOG3542	Rap guanine nucleotide exchange factor (GEF) 2 [Source:MGI Symbol;Acc:MGI:2659071]	76089	E9QNQ4;Q6NXI4
ENSMUSG00000021024	4830.65	1086.62	8574.68	7.89117	2.98024	2.28377e-26	5.07037e-25	12	55431007	55465239	+	1234	Psma6	GO:0000502;GO:0005634;GO:0005737;GO:0005839;GO:0019773;GO:0019773;GO:0051603;GO:0000502;GO:0000502;GO:0000932;GO:0003723;GO:0003723;GO:0004175;GO:0005515;GO:0005634;GO:0005634;GO:0005634;GO:0005654;GO:0005654;GO:0005654;GO:0005737;GO:0005737;GO:0005737;GO:0005829;GO:0005839;GO:0005839;GO:0005839;GO:0005839;GO:0005844;GO:0005844;GO:0006511;GO:0007519;GO:0010499;GO:0016363;GO:0019773;GO:0019773;GO:…	K02730	EC:3.4.25.1	O;K	1CTZX;0V8T4;18V1F;KOG0182;09W1B;1AS2P;12R1B;0DJ7Z;0UG9Q	proteasome subunit alpha 6 [Source:MGI Symbol;Acc:MGI:1347006]	26443	Q9QUM9
ENSMUSG00000020696	1123.98	429.113	1818.86	4.23865	2.0836	2.41372e-26	5.35094e-25	11	82693275	82762036	-	5922	Rffl	GO:0002020;GO:0002039;GO:0005737;GO:0005737;GO:0005737;GO:0005768;GO:0005829;GO:0005886;GO:0005886;GO:0005886;GO:0006511;GO:0006511;GO:0006886;GO:0006915;GO:0010008;GO:0010008;GO:0010762;GO:0010804;GO:0010804;GO:0016020;GO:0016567;GO:0016740;GO:0019901;GO:0031410;GO:0031625;GO:0043161;GO:0043161;GO:0043161;GO:0046872;GO:0055038;GO:0061630;GO:0061630;GO:0061630;GO:0070936;GO:0070936;GO:0070936;GO:…	K20804	EC:2.3.2.31	O	KOG4275;13IRX;0UFY9;1B465;0DMAJ;18TMI;1CW5T;09ZSI;0V96P	ring finger and FYVE like domain containing protein [Source:MGI Symbol;Acc:MGI:1914588]	67338	Q6ZQM0
ENSMUSG00000019866	2451.85	803.952	4099.74	5.09949	2.35035	2.43285e-26	5.38538e-25	10	43826632	44024849	-	7799	Crybg1	GO:0003674;GO:0005575;GO:0008150;GO:0003674;GO:0005575;GO:0008150;GO:0003674;GO:0005575;GO:0008150;	-	-	S	0V692;18Y7Y;0DGI7;1CR7Y;0IERF;0UNQW;136MA;1AY7C;09V9T	crystallin beta-gamma domain containing 1 [Source:MGI Symbol;Acc:MGI:109544]	11630	-
ENSMUSG00000060260	683.012	1150.82	215.202	0.186998	-2.41891	2.47437e-26	5.4692e-25	7	138828398	138849819	+	5963	Pwwp2b	GO:0003674;GO:0005654;GO:0008150;GO:0003674;GO:0005654;GO:0005654;GO:0008150;	-	-	S	0VD68;1CYY6;18ZRY;1346K;0A2AB;0UQ0J;1AYUT;0IIF8;0DPYC	PWWP domain containing 2B [Source:MGI Symbol;Acc:MGI:2142008]	101631	Q3TYY8;Q14AS8
ENSMUSG00000068246	56.5916	0	113.183	Inf	Inf	2.50264e-26	5.52353e-25	15	77613239	77620582	+	1821	Apol9b	GO:0005575;GO:0005576;GO:0006869;GO:0008150;GO:0008289;GO:0008289;GO:0042157;GO:0005575;GO:0005576;GO:0006869;GO:0008150;GO:0008289;GO:0008289;GO:0042157;GO:0005575;GO:0005576;GO:0006869;GO:0008150;GO:0008289;GO:0008289;GO:0042157;GO:0005575;GO:0005576;GO:0006869;GO:0008150;GO:0008289;GO:0008289;GO:0042157;	K14480	-	-	-	apolipoprotein L 9b [Source:MGI Symbol;Acc:MGI:1919148]	71898	Q8C7I4
ENSMUSG00000040613	11629.1	18143.2	5114.94	0.281921	-1.82664	2.77006e-26	6.10475e-25	6	122554751	122579403	-	2702	Apobec1	GO:0003723;GO:0003729;GO:0003729;GO:0003824;GO:0004126;GO:0004126;GO:0004126;GO:0004131;GO:0004131;GO:0005515;GO:0005634;GO:0005634;GO:0005634;GO:0005737;GO:0005737;GO:0005737;GO:0005737;GO:0006397;GO:0006641;GO:0006970;GO:0006970;GO:0008047;GO:0008047;GO:0008270;GO:0009972;GO:0010043;GO:0010332;GO:0016554;GO:0016554;GO:0016554;GO:0016556;GO:0016556;GO:0016787;GO:0016787;GO:0019904;GO:0019904;GO:…	K16932	EC:3.5.4.36	K	0IKDF;0VDJ5;1B207;1CZCX;13HK8;1930E;0A2PB;0UTK5;0DQB0	apolipoprotein B mRNA editing enzyme, catalytic polypeptide 1 [Source:MGI Symbol;Acc:MGI:103298]	11810	P51908;Q3U9G8
[truncated: 14,285 more rows]
