# Supplementary material for: Transcriptomics and quantitative proteomics reveal changes after second stimulation of bone marrow-derived macrophages from lupus-prone MRL/lpr mice
Source: Front Immunol. 2022 Oct 19;13:1004232. doi: 10.3389/fimmu.2022.1004232 (PMC9627492; doi:10.3389/fimmu.2022.1004232)
Supplement: Supplementary file 3 [file Table_3.xlsx]

## Sheet: Sheet1
id	baseMean	baseMean_B	baseMean_C	foldChange(C/B)(C/B)	log2FoldChange	pval	padj	Chromosome	Start Site	End Site	Direction	Length	Name	GO	KEGG	EC	eggNOG Class	eggNOG	Description	Entrez_geneID	UniProtAC
ENSMUSG00000073555	471.066	211.959	730.173	3.44488	1.78445	2.73109e-16	3.95981e-12	18	60345152	60380892	+	2645	Gm4951	GO:0003924;GO:0005525;GO:0005789;GO:0006952;GO:0016020;GO:0035458;GO:0035458;	-	-	S	0J4GH;13YGS	predicted gene 4951 [Source:MGI Symbol;Acc:MGI:3644953]	240327	Q3UED7
ENSMUSG00000015852	2185.37	1230.7	3140.04	2.55142	1.3513	8.5371e-15	6.18897e-11	3	87158065	87171045	-	2334	Fcrls	GO:0004888;GO:0005044;GO:0005887;GO:0006897;GO:0007166;GO:0016020;GO:0004888;GO:0005887;GO:0007166;	K06727	-	T	0V582;194IE;09U8X;0DFIQ;0UGWM;1B58W;1CQ8G;12TC2;0IH5T	Fc receptor-like S, scavenger receptor [Source:MGI Symbol;Acc:MGI:1933397]	80891	Q9EQY5
ENSMUSG00000069893	256.422	127.592	385.251	3.01939	1.59426	2.97386e-12	1.19509e-08	11	48836977	48870225	-	4895	9930111J21Rik1	GO:0003924;GO:0005525;GO:0005789;GO:0006952;GO:0016020;GO:0035458;GO:0003674;GO:0003924;GO:0005525;GO:0005575;GO:0005789;GO:0006952;GO:0008150;GO:0016020;GO:0035458;GO:0003674;GO:0003924;GO:0005525;GO:0005575;GO:0005789;GO:0006952;GO:0008150;GO:0016020;GO:0035458;	-	-	S	0VBXP;13J01;0DQAB;0USXH;1B4GM;0A2NU;1927P;1CZCD;0IJSM	RIKEN cDNA 9930111J21 gene 1 [Source:MGI Symbol;Acc:MGI:3041173]	667214	Q5SVP0
ENSMUSG00000043866	345.153	515.601	174.704	0.338837	-1.56134	3.29704e-12	1.19509e-08	7	105388600	105393568	-	4584	Taf10	GO:0000082;GO:0000125;GO:0000125;GO:0001889;GO:0003677;GO:0004402;GO:0004402;GO:0005515;GO:0005634;GO:0005634;GO:0005634;GO:0005634;GO:0005654;GO:0005654;GO:0005669;GO:0005669;GO:0005737;GO:0005737;GO:0006352;GO:0006352;GO:0006352;GO:0006355;GO:0006367;GO:0006367;GO:0006915;GO:0010468;GO:0016251;GO:0016251;GO:0016578;GO:0016578;GO:0019899;GO:0019899;GO:0030331;GO:0030331;GO:0030914;GO:0030914;GO:…	K03134	-	K	190ER;1AVHT;KOG3423;09WGU;0UK1F;13TH2;1CSGJ;0DHS9;0V7FB	TATA-box binding protein associated factor 10 [Source:MGI Symbol;Acc:MGI:1346320]	24075	Q8K0H5
ENSMUSG00000118590	397.774	226.792	568.756	2.50783	1.32644	3.08085e-11	8.93384e-08	1	84936703	84942293	+	1120	Gm15433	GO:0004930;GO:0007186;GO:0016020;GO:0016021;GO:0016021;	-	-	-	-	predicted pseudogene 15433 [Source:MGI Symbol;Acc:MGI:3705860]	-	-
ENSMUSG00000029366	2536.24	1579.5	3492.97	2.21144	1.14499	4.28371e-11	1.03516e-07	5	88912855	88931140	+	3781	Dck	GO:0000166;GO:0000287;GO:0004136;GO:0004137;GO:0004137;GO:0004137;GO:0004138;GO:0005524;GO:0005524;GO:0005524;GO:0005634;GO:0005654;GO:0005654;GO:0005737;GO:0005739;GO:0005829;GO:0006139;GO:0006170;GO:0006220;GO:0006220;GO:0008144;GO:0009157;GO:0016301;GO:0016310;GO:0016740;GO:0019136;GO:0019136;GO:0032548;GO:0042803;GO:0046092;GO:0046939;	K00893	EC:2.7.1.74	F	KOG4235;0DGV8;1CRJA;1B00U;09VKP;18ZKC;0UQPN;0V6JU;12PCY	deoxycytidine kinase [Source:MGI Symbol;Acc:MGI:102726]	13178	P43346;Q545E8
ENSMUSG00000050578	25301.8	17586	33017.7	1.8775	0.908815	6.64236e-11	1.37582e-07	9	7272514	7283331	+	2673	Mmp13	GO:0001958;GO:0001968;GO:0003417;GO:0004175;GO:0004222;GO:0004222;GO:0004222;GO:0005509;GO:0005509;GO:0005518;GO:0005518;GO:0005576;GO:0005576;GO:0005576;GO:0005615;GO:0005764;GO:0005794;GO:0006508;GO:0006508;GO:0006508;GO:0007507;GO:0008233;GO:0008233;GO:0008237;GO:0008237;GO:0008270;GO:0008270;GO:0008270;GO:0009725;GO:0016787;GO:0022617;GO:0022617;GO:0030198;GO:0030282;GO:0030282;GO:0030574;GO:…	K07994	EC:3.4.24.-	O;W	0DGSQ;KOG1565;0V6HA;1AUFS;09U0I;0UIYP;13GUN;18ZRE;1CRGU	matrix metallopeptidase 13 [Source:MGI Symbol;Acc:MGI:1340026]	17386	P33435;Q3U9V5
ENSMUSG00000031557	1648.3	1103.18	2193.41	1.98825	0.991502	1.41893e-10	2.57163e-07	8	25529160	25592392	-	5579	Plekha2	GO:0001954;GO:0001968;GO:0005515;GO:0005634;GO:0005737;GO:0005737;GO:0005737;GO:0005886;GO:0008289;GO:0016020;GO:0016020;GO:0016020;GO:0030165;GO:0030165;GO:0032991;GO:0043236;GO:0043325;GO:0001954;GO:0001968;GO:0005515;GO:0005634;GO:0005737;GO:0005737;GO:0005737;GO:0005886;GO:0008289;GO:0016020;GO:0016020;GO:0016020;GO:0030165;GO:0030165;GO:0032991;GO:0043236;GO:0043325;	K23796	-	T	1AXV5;18W2E;0UKJ6;0DJIX;09Y5M;13JCB;1CUBG;0IF2M;0V916	pleckstrin homology domain-containing, family A (phosphoinositide binding specific) member 2 [Source:MGI Symbol;Acc:MGI:1928144]	83436	Q9ERS5
ENSMUSG00000028337	2371.6	1611.72	3131.48	1.94294	0.958244	1.59656e-10	2.57206e-07	4	46536937	46602202	-	6459	Coro2a	GO:0003779;GO:0003779;GO:0005903;GO:0017053;GO:0017053;GO:0051015;GO:0051015;GO:0017053;GO:0017053;GO:0051015;GO:0003779;GO:0003779;GO:0005903;GO:0017053;GO:0017053;GO:0051015;GO:0051015;	K13887	-	Z	1AXMX;12NEF;0V4FS;09TGS;18WVV;KOG0303;1CVDP;0UKA6;0DEVK	coronin, actin binding protein 2A [Source:MGI Symbol;Acc:MGI:1345966]	107684	Q8C0P5;B1AVH4
ENSMUSG00000032265	1474.33	993.236	1955.43	1.96875	0.977281	5.63367e-10	8.16826e-07	9	85202492	85209401	-	5703	Tent5a	GO:0005575;GO:0009617;GO:0048255;GO:1990817;GO:1990817;GO:0005575;GO:0009617;GO:0048255;GO:1990817;GO:1990817;	K23033	EC:2.7.7.-	S	1CRRF;12P1E;0V8F9;KOG3852;18TXM;1B2M1;09XC6;0DH16;0UP82	terminal nucleotidyltransferase 5A [Source:MGI Symbol;Acc:MGI:2670964]	212943	D3Z5S8
ENSMUSG00000118607	425.314	259.493	591.135	2.27804	1.18779	1.24174e-09	1.63673e-06	1	85454323	85479899	+	2798	Gm7592	GO:0003674;GO:0004930;GO:0004930;GO:0005575;GO:0005634;GO:0007186;GO:0007186;GO:0008150;GO:0016020;GO:0016021;GO:0016021;GO:0003674;GO:0004930;GO:0004930;GO:0005575;GO:0007186;GO:0007186;GO:0008150;GO:0016020;GO:0016021;GO:0016021;	-	-	-	-	predicted gene 7592 [Source:MGI Symbol;Acc:MGI:3644077]	101055758	-
ENSMUSG00000069874	4449.16	2812.55	6085.77	2.16379	1.11356	1.71475e-09	2.07184e-06	11	58090444	58113608	+	3690	Irgm2	GO:0000045;GO:0000139;GO:0001934;GO:0003924;GO:0003924;GO:0005525;GO:0005739;GO:0005789;GO:0005794;GO:0005794;GO:0005829;GO:0006952;GO:0009617;GO:0010508;GO:0010800;GO:0016020;GO:0019901;GO:0020003;GO:0031648;GO:0033138;GO:0034341;GO:0035458;GO:0042742;GO:0042742;GO:0042832;GO:0043254;GO:0043539;GO:0045087;GO:0050700;GO:0050821;GO:0050829;GO:0051434;GO:0060335;GO:0061635;GO:0061739;GO:0061762;GO:…	K14139	EC:3.6.5.-	-	-	immunity-related GTPase family M member 2 [Source:MGI Symbol;Acc:MGI:1926262]	54396	Q9Z1M2
ENSMUSG00000024079	5316.44	3507.74	7125.14	2.03126	1.02238	2.1732e-09	2.42378e-06	17	79159993	79190002	-	5113	Eif2ak2	GO:0000166;GO:0000186;GO:0000186;GO:0001819;GO:0002376;GO:0003723;GO:0003725;GO:0004672;GO:0004672;GO:0004672;GO:0004672;GO:0004674;GO:0004694;GO:0004694;GO:0004713;GO:0004715;GO:0005515;GO:0005515;GO:0005515;GO:0005524;GO:0005524;GO:0005634;GO:0005634;GO:0005737;GO:0005737;GO:0005829;GO:0006412;GO:0006468;GO:0006468;GO:0009615;GO:0009615;GO:0009636;GO:0010998;GO:0016301;GO:0016310;GO:0016740;GO:…	K16195	EC:2.7.11.1	J;K	0A4UA;1D0IE;0DRCV;18USK;1B1A6;0V9PP;0UQIK;KOG1033;13MHE	eukaryotic translation initiation factor 2-alpha kinase 2 [Source:MGI Symbol;Acc:MGI:1353449]	19106	Q03963
ENSMUSG00000070327	51536.3	33777.2	69295.5	2.05154	1.03671	2.48268e-09	2.57117e-06	11	119283926	119378244	+	16888	Rnf213	GO:0004842;GO:0016567;GO:0016887;GO:0046872;GO:0001525;GO:0001525;GO:0002040;GO:0002040;GO:0002040;GO:0004842;GO:0004842;GO:0004842;GO:0004842;GO:0005730;GO:0005730;GO:0005730;GO:0005737;GO:0005737;GO:0005829;GO:0005829;GO:0005829;GO:0005829;GO:0006511;GO:0006511;GO:0006511;GO:0016567;GO:0016567;GO:0016740;GO:0016787;GO:0016887;GO:0016887;GO:0016887;GO:0046872;GO:0051260;GO:0051260;GO:0051865;GO:…	K22754	EC:2.3.2.27	O;L	0A36T;0UI1D;0VCRZ;13JN5;190CU;0IHNB;0DFN7;1CQBS;1ATKY	ring finger protein 213 [Source:MGI Symbol;Acc:MGI:1289196]	672511	-
ENSMUSG00000025324	1185.98	683.347	1688.62	2.4711	1.30516	3.48333e-09	3.36698e-06	7	58305914	58479168	+	5587	Atp10a	GO:0000287;GO:0005524;GO:0015914;GO:0016020;GO:0016021;GO:0016021;GO:0034204;GO:0140326;GO:0000166;GO:0000166;GO:0000287;GO:0000287;GO:0005524;GO:0005524;GO:0005783;GO:0005783;GO:0005783;GO:0005789;GO:0005886;GO:0005886;GO:0005887;GO:0006869;GO:0015914;GO:0016020;GO:0016021;GO:0016021;GO:0034204;GO:0045332;GO:0046872;GO:0140326;GO:0140326;GO:0140326;GO:0140345;GO:0140345;GO:0140351;GO:1903527;GO:…	K01530	EC:7.6.2.1	P	18VYM;0UJDW;0DHAP;12NWG;1ASE6;KOG0206;1CS0T;09U13;0V6ZX	ATPase, class V, type 10A [Source:MGI Symbol;Acc:MGI:1330809]	11982	O54827;Q3V1Y7;Q6A046
ENSMUSG00000071350	917.339	458.099	1376.58	3.00498	1.58736	5.72548e-09	5.18835e-06	14	59639458	59678333	-	4047	Setdb2	GO:0003677;GO:0005634;GO:0005634;GO:0005694;GO:0008270;GO:0018024;GO:0034968;GO:0000278;GO:0000278;GO:0000278;GO:0001947;GO:0003677;GO:0005634;GO:0005634;GO:0005634;GO:0005634;GO:0005634;GO:0005654;GO:0005654;GO:0005694;GO:0005829;GO:0005829;GO:0006325;GO:0007049;GO:0007059;GO:0007059;GO:0007059;GO:0007275;GO:0008168;GO:0008270;GO:0010629;GO:0016740;GO:0018024;GO:0032259;GO:0034968;GO:0045892;GO:…	K18494	EC:2.1.1.355	B	09ZQ0;1CV0C;0UP3G;12QEF;KOG1141;18VYN;0DK6E;1AWSN;0VAKR	SET domain, bifurcated 2 [Source:MGI Symbol;Acc:MGI:2685139]	239122	B2RXP3
ENSMUSG00000091144	225.78	119.239	332.321	2.78701	1.47872	9.60096e-09	8.18849e-06	14	59618282	59632830	-	3459	Phf11c	GO:0003674;GO:0005634;GO:0005654;GO:0008150;GO:0031965;GO:0046872;	-	-	K	1CVYF;0UQ6M;0VAGS;18TG3;0DM3F;13P62;09ZJZ;1B470;KOG1084	PHD finger protein 11C [Source:MGI Symbol;Acc:MGI:3648476]	628705	B4XVP9
ENSMUSG00000066677	184.228	80.563	287.893	3.57352	1.83734	1.15817e-08	9.32905e-06	1	173501241	173525961	+	5258	Ifi208	GO:0000122;GO:0000978;GO:0001227;GO:0002218;GO:0003690;GO:0003690;GO:0005634;GO:0005654;GO:0005730;GO:0005829;GO:0008134;GO:0035458;GO:0035458;GO:0042802;GO:0000122;GO:0000978;GO:0001227;GO:0002218;GO:0003690;GO:0003690;GO:0005634;GO:0005654;GO:0005730;GO:0005829;GO:0008134;GO:0035458;GO:0035458;GO:0042802;	-	-	S	1D9G6;0AIGV;0UYUS;0VVZA;130S3;0E16W;0KEIM	interferon activated gene 208 [Source:MGI Symbol;Acc:MGI:2442822]	100033459	Q3V3Q4
ENSMUSG00000036249	684.263	456.641	911.886	1.99694	0.997794	1.28032e-08	9.77023e-06	2	51814460	51825175	-	2633	Rbm43	GO:0003674;GO:0003676;GO:0003723;GO:0005575;GO:0008150;GO:0003674;GO:0003676;GO:0003723;GO:0005575;GO:0008150;GO:0003674;GO:0003676;GO:0003723;GO:0005575;GO:0008150;	-	-	B	18TN7;13N2Z;1ATDP;0VF7N;0A4CU;0UQP0;0DRW9;1D01Z;KOG4012	RNA binding motif protein 43 [Source:MGI Symbol;Acc:MGI:1918934]	71684	Q99J64
ENSMUSG00000023367	876.04	553.635	1198.45	2.16469	1.11416	1.82371e-08	1.3221e-05	6	48817853	48824005	+	3810	Tmem176a	GO:0016021;GO:0005515;GO:0016020;GO:0016021;GO:0016021;GO:2001199;GO:2001199;GO:0005515;GO:0016020;GO:0016021;GO:0016021;GO:2001199;GO:2001199;GO:0005515;GO:0016020;GO:0016021;GO:0016021;GO:2001199;GO:2001199;GO:0016020;GO:0016021;GO:0016021;GO:0016020;GO:0016021;GO:0016021;	-	-	S	0IX21;0UVK6;13SCK;19326;1D3R8;1B5XQ;0VIFM;0A7H0;0DUDK	transmembrane protein 176A [Source:MGI Symbol;Acc:MGI:1913308]	66058	Q9DCS1
ENSMUSG00000027580	27791.3	20472.3	35110.2	1.71501	0.778218	1.99967e-08	1.38063e-05	2	180869408	180883820	-	11529	Helz2	GO:0000166;GO:0000184;GO:0003677;GO:0003723;GO:0003723;GO:0003724;GO:0004386;GO:0004386;GO:0004540;GO:0005524;GO:0005634;GO:0005654;GO:0005737;GO:0016787;GO:0030374;GO:0030374;GO:0045944;GO:0046872;GO:0090501;GO:0003723;GO:0004386;GO:0004540;GO:0005634;GO:0030374;GO:0030374;GO:0045893;GO:0045944;GO:0090501;GO:0003723;GO:0004386;GO:0004540;GO:0005634;GO:0030374;GO:0045893;GO:0090501;	-	-	A;J;K	12N6M;KOG1804;18VCR;1CPF2;KOG2102;0UFRU;0V4D9;1B371;0DER9;09TE5	helicase with zinc finger 2, transcriptional coactivator [Source:MGI Symbol;Acc:MGI:2385169]	229003	E9QAM5;Q3TZD5
ENSMUSG00000056116	2797.38	1649.61	3945.15	2.39156	1.25795	2.30268e-08	1.50268e-05	17	36348020	36353639	-	3414	H2-T22	GO:0002476;GO:0005615;GO:0009897;GO:0016020;GO:0016021;GO:0002476;GO:0005615;GO:0009897;GO:0002476;GO:0005615;GO:0009897;GO:0016020;GO:0016021;GO:0002476;GO:0005615;GO:0009897;GO:0016020;GO:0016021;	K06751	-	-	-	histocompatibility 2, T region locus 22 [Source:MGI Symbol;Acc:MGI:95956]	15039	Q9BCZ1
ENSMUSG00000035725	2598.28	1831.93	3364.64	1.83667	0.877089	2.38373e-08	1.50268e-05	X	76805017	76839884	-	5807	Prkx	GO:0000166;GO:0001525;GO:0001525;GO:0001935;GO:0001935;GO:0004672;GO:0004674;GO:0004674;GO:0004674;GO:0004691;GO:0004691;GO:0004691;GO:0005524;GO:0005524;GO:0005634;GO:0005634;GO:0005654;GO:0005737;GO:0005737;GO:0005952;GO:0006468;GO:0007155;GO:0007155;GO:0007165;GO:0007275;GO:0016301;GO:0016310;GO:0016740;GO:0018105;GO:0018105;GO:0018105;GO:0030099;GO:0030099;GO:0030154;GO:0030155;GO:0030334;GO:…	K19584	EC:2.7.11.11	T	KOG0616;09Y1Y;0DP4M;194UW;0UKDE;1CY2N;1ARSK;0V8ZF;12QSF	protein kinase, X-linked [Source:MGI Symbol;Acc:MGI:1309999]	19108	Q922R0
ENSMUSG00000038485	896.839	617.821	1175.86	1.90324	0.928454	2.68005e-08	1.61909e-05	11	97253261	97289368	+	7381	Socs7	GO:0009968;GO:0016567;GO:0035556;GO:0040008;GO:0005515;GO:0005634;GO:0005737;GO:0005829;GO:0005886;GO:0005942;GO:0008286;GO:0009968;GO:0016020;GO:0016567;GO:0016567;GO:0021799;GO:0021819;GO:0021942;GO:0035556;GO:0040008;GO:0043551;GO:0045444;GO:0046854;GO:0046935;	K04699	-	T	0UGH4;1CSIJ;0V90T;12PZB;KOG4566;18Z2G;0DHU4;09Y3E;1AS98	suppressor of cytokine signaling 7 [Source:MGI Symbol;Acc:MGI:2651588]	192157	Q8VHQ2
ENSMUSG00000037826	473.041	307.565	638.518	2.07605	1.05384	2.84165e-08	1.64805e-05	6	57483487	57512453	-	6022	Ppm1k	GO:0004721;GO:0004722;GO:0005739;GO:0005739;GO:0005759;GO:0006470;GO:0016311;GO:0016787;GO:0016791;GO:0043169;GO:0046872;GO:0106306;GO:0106307;GO:0016311;GO:0016791;	K17505	EC:3.1.3.16	T	12W2A;0V7PX;0DI16;1CSRU;1ASX6;0UKDI;KOG0698;09WRI;18UDH	protein phosphatase 1K (PP2C domain containing) [Source:MGI Symbol;Acc:MGI:2442111]	243382	Q8BXN7;B9EHW0
ENSMUSG00000069892	828.142	477.877	1178.41	2.46592	1.30213	3.6417e-08	1.95011e-05	11	48906701	48942069	-	7017	9930111J21Rik2	GO:0003674;GO:0005525;GO:0005575;GO:0008150;GO:0016020;GO:0003674;GO:0003924;GO:0005525;GO:0005575;GO:0005789;GO:0006952;GO:0008150;GO:0016020;GO:0035458;GO:0003674;GO:0003924;GO:0005525;GO:0005575;GO:0005789;GO:0006952;GO:0008150;GO:0016020;GO:0035458;	-	-	-	-	RIKEN cDNA 9930111J21 gene 2 [Source:MGI Symbol;Acc:MGI:3711310]	245240	Q8CB10
ENSMUSG00000032724	617.103	402.439	831.768	2.06682	1.04741	3.67651e-08	1.95011e-05	2	103396655	103548768	+	6032	Abtb2	GO:0005654;GO:0046982;GO:0097237;	K10521	-	S	0DIVS;09XIB;0UMHV;1B0U1;1CYQE;0IESM;12X6N;0V8GG;18TJ2	ankyrin repeat and BTB (POZ) domain containing 2 [Source:MGI Symbol;Acc:MGI:2139365]	99382	Q7TQI7;Q3T9J9
ENSMUSG00000039997	3730.52	2140.98	5320.06	2.48488	1.31317	3.84032e-08	1.95011e-05	1	173747973	173770238	-	6706	Ifi203	GO:0002218;GO:0035458;GO:0002218;GO:0035458;GO:0002218;GO:0035458;GO:0002218;GO:0035458;GO:0002218;GO:0035458;	-	-	K	1CTDT;0UM8D;0DINX;0J5NP;194Q0;1B2J8;1408X;0V89T;09XBF	interferon activated gene 203 [Source:MGI Symbol;Acc:MGI:96428]	15950	O35368;E9PUG6
ENSMUSG00000032727	605.206	406.12	804.291	1.98043	0.98581	3.95882e-08	1.95011e-05	13	111817513	111855130	+	6094	Mier3	GO:0000122;GO:0001103;GO:0003714;GO:0005634;GO:0005634;GO:0005634;GO:0005654;GO:0005654;GO:0005654;GO:0032991;GO:0032991;GO:0042826;GO:0000122;GO:0001103;GO:0003714;GO:0005634;GO:0005634;GO:0005654;GO:0005654;GO:0032991;GO:0042826;GO:0005634;	-	-	K	KOG4329;12QXQ;09UWJ;0DFQS;1B0RW;0UH5M;191W5;0V5WA;1CQEE	MIER family member 3 [Source:MGI Symbol;Acc:MGI:2442317]	218613	Q3UHF3
ENSMUSG00000063268	2617.68	1853.74	3381.62	1.82422	0.867277	4.03498e-08	1.95011e-05	15	76115374	76127641	-	4275	Parp10	GO:0003950;GO:0003950;GO:0016740;GO:0016757;GO:0003714;GO:0003950;GO:0003950;GO:0003950;GO:0005634;GO:0005634;GO:0005634;GO:0005730;GO:0005730;GO:0005737;GO:0005737;GO:0005737;GO:0005794;GO:0005794;GO:0005829;GO:0005829;GO:0006281;GO:0006471;GO:0006974;GO:0010629;GO:0010629;GO:0010847;GO:0016740;GO:0016757;GO:0019985;GO:0019985;GO:0032088;GO:0045071;GO:0045892;GO:0048147;GO:0070212;GO:0070212;GO:…	K15261	EC:2.4.2.30	S	09V45;1CR2R;0URB6;1AXS0;18THP;0IH3S;0DGDA;0V63S;12T9U	poly (ADP-ribose) polymerase family, member 10 [Source:MGI Symbol;Acc:MGI:3712326]	671535	Q8CIE4
ENSMUSG00000073557	1021.24	1328.11	714.375	0.53789	-0.894616	4.50813e-08	2.1085e-05	1	134682396	134883680	-	14983	Ppp1r12b	GO:0004857;GO:0005737;GO:0005737;GO:0005856;GO:0007165;GO:0019208;GO:0019208;GO:0019901;GO:0030018;GO:0030018;GO:0031672;GO:0031672;GO:0043086;GO:0050790;GO:0005737;GO:0007165;GO:0019208;GO:0019208;GO:0019901;GO:0050790;GO:0019901;GO:0005737;GO:0007165;GO:0019208;GO:0019208;GO:0019901;GO:0050790;GO:0004857;GO:0005737;GO:0005737;GO:0005856;GO:0007165;GO:0019208;GO:0019208;GO:0019901;GO:0030018;GO:…	K12329	-	O;T	09UWV;KOG0505;1ASNX;0UGZV;0V5WP;195GP;12S5D;1CT4Y;0DG6B	protein phosphatase 1, regulatory subunit 12B [Source:MGI Symbol;Acc:MGI:1916417]	329251	A6H644
ENSMUSG00000053835	2674.55	1623.99	3725.1	2.29379	1.19773	7.58941e-08	3.43872e-05	17	36316587	36331452	-	2182	H2-T24	GO:0002476;GO:0005615;GO:0009897;GO:0016020;GO:0016021;GO:0002476;GO:0005615;GO:0009897;	K06751	-	O	140MA;1CRNH;0J90V;0DGY9;09VPP;1B75W;0V6NS;0UIX7	histocompatibility 2, T region locus 24 [Source:MGI Symbol;Acc:MGI:95958]	15042	F8VQG4
ENSMUSG00000040033	6260.22	4564.04	7956.4	1.74328	0.801805	1.02091e-07	4.48551e-05	10	128106428	128128718	+	5926	Stat2	GO:0003677;GO:0003677;GO:0003700;GO:0005515;GO:0005634;GO:0005634;GO:0005737;GO:0006355;GO:0007165;GO:0001932;GO:0003677;GO:0003677;GO:0003700;GO:0005634;GO:0005634;GO:0005737;GO:0005829;GO:0005886;GO:0006355;GO:0007165;GO:0042802;GO:0044389;GO:0051607;GO:0060337;GO:0090140;	K11221	-	K	09VSF;1B4K1;KOG3667;0UTZZ;0V6RF;0DH0Y;13KI3;1CRR8;1924Q	signal transducer and activator of transcription 2 [Source:MGI Symbol;Acc:MGI:103039]	20847	Q9QXJ2
ENSMUSG00000037321	5358.96	3159.21	7558.72	2.3926	1.25858	1.08512e-07	4.62742e-05	17	34406527	34416199	+	5476	Tap1	GO:0000166;GO:0000166;GO:0002250;GO:0002376;GO:0002479;GO:0005524;GO:0005524;GO:0005524;GO:0005524;GO:0005739;GO:0005783;GO:0005783;GO:0005783;GO:0005789;GO:0006952;GO:0015031;GO:0015433;GO:0015433;GO:0015433;GO:0015433;GO:0015440;GO:0015833;GO:0015833;GO:0015833;GO:0015833;GO:0015833;GO:0016020;GO:0016020;GO:0016021;GO:0016021;GO:0016021;GO:0016021;GO:0016021;GO:0016887;GO:0016887;GO:0019885;GO:…	K05653	-	Q;U	KOG0058;09UWX;0UKTV;0V5WR;18U06;1AVK0;1CU6J;12RBY;0DG6C	transporter 1, ATP-binding cassette, sub-family B (MDR/TAP) [Source:MGI Symbol;Acc:MGI:98483]	21354	P21958;Q3U6V4
ENSMUSG00000040430	732.708	508.895	956.522	1.87961	0.91043	1.26542e-07	5.24208e-05	11	107098718	107361525	-	6612	Pitpnc1	GO:0005548;GO:0005654;GO:0005737;GO:0005829;GO:0007165;GO:0008526;GO:0015914;GO:0015914;GO:0035091;GO:0070300;GO:1901611;GO:1990050;GO:0005548;GO:0005634;GO:0005737;GO:0005737;GO:0005737;GO:0006869;GO:0007165;GO:0008289;GO:0008526;GO:0008526;GO:0008526;GO:0015914;GO:0035091;GO:0035091;GO:0046488;GO:0120009;GO:1990050;GO:0005548;GO:0015914;	-	-	T;I	0A076;1AW09;12TMQ;KOG3668;0UMYF;1CWP0;18WXX;0DMTN;0VB36	phosphatidylinositol transfer protein, cytoplasmic 1 [Source:MGI Symbol;Acc:MGI:1919045]	71795	Q8K4R4
ENSMUSG00000042350	2457.83	1678.58	3237.09	1.92847	0.947456	1.58471e-07	6.38243e-05	12	84964922	85017674	-	6044	Arel1	GO:0004842;GO:0016020;GO:0016021;GO:0016567;GO:0000209;GO:0004842;GO:0004842;GO:0004842;GO:0005515;GO:0005737;GO:0005737;GO:0005829;GO:0005829;GO:0006511;GO:0006511;GO:0006511;GO:0006915;GO:0016567;GO:0016567;GO:0016567;GO:0016740;GO:0043066;GO:0043066;GO:0043066;GO:0043161;GO:0045732;GO:0050727;GO:0061630;GO:0016020;GO:0016021;GO:0016020;GO:0016021;GO:0016020;GO:0016021;GO:0016020;GO:0016021;GO:…	K22370	EC:2.3.2.26	O;K	12PJR;0DH6V;18VGU;0UJ8P;1ASP9;1CRX0;0V6WQ;09VY8;KOG0939	apoptosis resistant E3 ubiquitin protein ligase 1 [Source:MGI Symbol;Acc:MGI:1915747]	68497	Q8CHG5
ENSMUSG00000046157	1518.47	1102.09	1934.85	1.75562	0.811982	1.64833e-07	6.45924e-05	12	79008569	79054401	-	4732	Tmem229b	GO:0003674;GO:0005575;GO:0009617;GO:0016020;GO:0016021;GO:0003674;GO:0005575;GO:0009617;GO:0016020;GO:0016021;GO:0003674;GO:0005575;GO:0009617;GO:0016020;GO:0016021;GO:0003674;GO:0005575;GO:0009617;GO:0016020;GO:0016021;GO:0016020;GO:0016021;	-	-	S	0DQ8Z;1AWET;1CZAT;0VDHC;13HZS;0UKYN;0A2MC;18XXK;0IH50	transmembrane protein 229B [Source:MGI Symbol;Acc:MGI:2444389]	268567	Q8BFQ2
ENSMUSG00000018909	2329.75	2944.38	1715.11	0.582503	-0.779662	1.79638e-07	6.84489e-05	7	99184673	99255978	+	11175	Arrb1	GO:0000187;GO:0000785;GO:0001664;GO:0001933;GO:0001934;GO:0001934;GO:0002031;GO:0002031;GO:0002092;GO:0002092;GO:0003713;GO:0005096;GO:0005102;GO:0005159;GO:0005515;GO:0005515;GO:0005634;GO:0005634;GO:0005634;GO:0005654;GO:0005737;GO:0005737;GO:0005737;GO:0005768;GO:0005829;GO:0005829;GO:0005829;GO:0005829;GO:0005886;GO:0005886;GO:0005905;GO:0006355;GO:0006357;GO:0006511;GO:0006511;GO:0006897;GO:…	K04439	-	T;K;B	0V7QR;1AUZK;09WSH;0DI27;190ID;1CSST;134FY;KOG3865;0UKEQ	arrestin, beta 1 [Source:MGI Symbol;Acc:MGI:99473]	109689	Q8BWG8
ENSMUSG00000027641	429.577	257.044	602.11	2.34244	1.22801	1.84117e-07	6.84489e-05	2	156987813	157046454	-	5993	Rbl1	GO:0000122;GO:0000785;GO:0000977;GO:0001102;GO:0005515;GO:0005515;GO:0005515;GO:0005634;GO:0005634;GO:0005634;GO:0005654;GO:0005654;GO:0005654;GO:0005667;GO:0005667;GO:0005667;GO:0006325;GO:0006357;GO:0007049;GO:0008134;GO:0008134;GO:0010629;GO:0010629;GO:0030154;GO:0043550;GO:0043550;GO:0051302;GO:0051726;GO:1990841;GO:1990841;GO:2000134;GO:2000773;GO:2000773;	K04681	-	D;B	KOG1010;0V7EN;0UK0A;09WG3;1923M;1CQNY;0DHRJ;1AVGS;12TRG	RB transcriptional corepressor like 1 [Source:MGI Symbol;Acc:MGI:103300]	19650	Q64701;Q3UI58;Q6PAR4
ENSMUSG00000026104	1587.01	979.686	2194.34	2.23984	1.1634	2.15204e-07	7.8006e-05	1	52158599	52201024	+	7105	Stat1	GO:0003677;GO:0003677;GO:0003700;GO:0005634;GO:0005634;GO:0005737;GO:0006355;GO:0007165;GO:0003677;GO:0003677;GO:0003700;GO:0005634;GO:0005634;GO:0005737;GO:0006355;GO:0007165;GO:0003677;GO:0003677;GO:0003700;GO:0005634;GO:0005634;GO:0005737;GO:0006355;GO:0007165;GO:0003677;GO:0003677;GO:0003700;GO:0005634;GO:0005634;GO:0005737;GO:0006355;GO:0007165;GO:0003700;GO:0005634;GO:0006355;GO:0007165;GO:…	K11220	-	K	1CT96;09X75;13KVM;KOG3667;0DIIK;0V85R;19261;0UM31;1AY23	signal transducer and activator of transcription 1 [Source:MGI Symbol;Acc:MGI:103063]	20846	Q8CFQ1;A0A087WSP5;Q8C8M3
ENSMUSG00000031792	2144.68	1584.78	2704.58	1.70659	0.771119	2.91833e-07	0.000102609	8	96058912	96074135	+	2803	Usb1	GO:0000175;GO:0000175;GO:0004518;GO:0004518;GO:0005634;GO:0005634;GO:0005654;GO:0008380;GO:0016787;GO:0034477;GO:0034477;GO:0034477;GO:0045171;GO:0090305;GO:0090503;GO:1990838;GO:0004518;GO:0005634;GO:0016787;GO:0034477;GO:0090305;	K23093	EC:3.1.4.-	A	13NN2;KOG3102;1CU9Y;1B2RS;0UM5C;18VP2;0DJHH;0A2EH;0VDA4	U6 snRNA biogenesis 1 [Source:MGI Symbol;Acc:MGI:2142454]	101985	Q91W78;A0A0R4J0E0
ENSMUSG00000002307	6445.62	3957.74	8933.51	2.25722	1.17455	2.98268e-07	0.000102609	17	34128388	34134564	+	3151	Daxx	GO:0000775;GO:0005634;GO:0005654;GO:0005694;GO:0005730;GO:0005737;GO:0006325;GO:0006915;GO:0016605;GO:0000775;GO:0005634;GO:0005654;GO:0005694;GO:0005730;GO:0005737;GO:0006325;GO:0006915;GO:0016605;GO:0032147;GO:0045893;GO:0000775;GO:0005634;GO:0005654;GO:0005694;GO:0005730;GO:0005737;GO:0006325;GO:0006915;GO:0016605;GO:0000775;GO:0000775;GO:0001934;GO:0002039;GO:0003713;GO:0003714;GO:0005634;GO:…	K02308	-	K	0DGZA;0UIKG;0IGIP;12P90;1AUFZ;1CRPG;09VQQ;1944Y;0V6PS	Fas death domain-associated protein [Source:MGI Symbol;Acc:MGI:1197015]	13163	O35613;Q3UKR0
ENSMUSG00000024457	2932.49	2183.92	3681.05	1.68553	0.753201	3.0431e-07	0.000102609	17	37148026	37170290	+	6868	Trim26	GO:0008270;GO:0045087;GO:0046597;GO:0046872;GO:0051091;GO:1902187;GO:0002376;GO:0005634;GO:0005737;GO:0005737;GO:0005737;GO:0008270;GO:0010468;GO:0016567;GO:0016740;GO:0045087;GO:0045087;GO:0045087;GO:0046597;GO:0046872;GO:0051091;GO:0051091;GO:0061630;GO:1902187;GO:0002376;GO:0005634;GO:0005737;GO:0005737;GO:0005737;GO:0008270;GO:0010468;GO:0016567;GO:0016740;GO:0045087;GO:0045087;GO:0045087;GO:…	K12008	-	O	KOG2177;0WIZF;197FJ;0E9EK;1BBG6;0B69M;1DG9W;0V3T5;13FXH	tripartite motif-containing 26 [Source:MGI Symbol;Acc:MGI:1337056]	22670	Q99PN3
ENSMUSG00000020134	9172.12	6930	11414.2	1.64708	0.719907	3.14336e-07	0.000103581	11	21041291	21100323	+	6553	Peli1	GO:0000209;GO:0000209;GO:0000209;GO:0000778;GO:0001819;GO:0004842;GO:0005515;GO:0005515;GO:0005634;GO:0008063;GO:0008063;GO:0008592;GO:0016567;GO:0016740;GO:0030890;GO:0031398;GO:0032088;GO:0032496;GO:0034141;GO:0034145;GO:0042130;GO:0043123;GO:0043161;GO:0043161;GO:0043331;GO:0050868;GO:0050871;GO:0060546;GO:0060546;GO:0061630;GO:0061630;GO:0061630;GO:0061630;GO:0070534;GO:0070534;GO:0070936;GO:…	K11964	EC:2.3.2.27	T	0DNAJ;KOG3842;0VBJD;1CX7H;12TB1;1B2V7;18YWZ;0A0P6;0UIUF	pellino 1 [Source:MGI Symbol;Acc:MGI:1914495]	67245	Q8C669;Q5SRW7
ENSMUSG00000026536	1331.69	721.099	1942.29	2.69351	1.42949	3.22935e-07	0.00010405	1	173723911	173740612	-	1785	Ifi211	GO:0000122;GO:0000978;GO:0001227;GO:0002218;GO:0002218;GO:0003690;GO:0003690;GO:0005634;GO:0005634;GO:0005654;GO:0005730;GO:0005730;GO:0005829;GO:0008134;GO:0009617;GO:0016607;GO:0032731;GO:0034399;GO:0035458;GO:0035458;GO:0042802;	-	-	K	1CTDT;0UM8D;0DINX;0J5NP;194Q0;1B2J8;1408X;0V89T;09XBF	interferon activated gene 211 [Source:MGI Symbol;Acc:MGI:3041120]	381308	P0DOV1
ENSMUSG00000079339	82.4265	36.0183	128.835	3.57692	1.83872	3.76821e-07	0.00011688	19	34570291	34579356	-	2260	Ifit1bl1	GO:0003723;GO:0003723;GO:0005737;GO:0005737;GO:0005829;GO:0005829;GO:0009615;GO:0050688;GO:0051607;GO:0071357;GO:0071360;GO:0003723;GO:0003723;GO:0005737;GO:0005737;GO:0005829;GO:0005829;GO:0009615;GO:0050688;GO:0051607;GO:0071357;GO:0071360;	K14217	-	S;P	0DNWM;0A0WM;1CXU0;13I8N;1B0KV;0V5W7;KOG1124;1949C;0UM6F	interferon induced protein with tetratricpeptide repeats 1B like 1 [Source:MGI Symbol;Acc:MGI:3650685]	667373	E9PXF7
ENSMUSG00000031627	1167.33	791.731	1542.92	1.94879	0.962581	3.78878e-07	0.00011688	8	47192767	47300493	+	7396	Irf2	GO:0000976;GO:0000977;GO:0000977;GO:0000978;GO:0000981;GO:0001228;GO:0001228;GO:0002376;GO:0003677;GO:0003677;GO:0003677;GO:0003700;GO:0003700;GO:0003700;GO:0005634;GO:0005634;GO:0005654;GO:0005654;GO:0005829;GO:0005829;GO:0005925;GO:0005925;GO:0006355;GO:0006355;GO:0006355;GO:0006357;GO:0008283;GO:0045944;GO:0045944;GO:0051607;GO:0051607;GO:1990837;GO:1990837;GO:0000976;GO:0003700;GO:0005634;GO:…	K10153	-	K	0IGY9;0A1B3;13GYA;0DNYP;0UKP8;190W0;1CXW7;1B22Y;0VC6R	interferon regulatory factor 2 [Source:MGI Symbol;Acc:MGI:96591]	16363	P23906;Q3U2Z2
ENSMUSG00000045210	2709.02	2021.75	3396.29	1.67988	0.748358	4.109e-07	0.000124117	1	9788847	9818607	-	9749	Vcpip1	GO:0000278;GO:0004843;GO:0004843;GO:0004843;GO:0004843;GO:0005634;GO:0005737;GO:0006508;GO:0006974;GO:0007030;GO:0008233;GO:0008234;GO:0016320;GO:0016567;GO:0016567;GO:0016579;GO:0018215;GO:0035871;GO:0071108;GO:0090168;GO:0106300;GO:1905634;	K11861	EC:3.4.19.12	T	0WHDQ;1BB3Q;1979C;0B4UX;0V39Y;0E8HY;13DPR;1DFG2;0IQZJ	valosin containing protein (p97)/p47 complex interacting protein 1 [Source:MGI Symbol;Acc:MGI:1917925]	70675	Q8CDG3;A0A0R4J0M9
ENSMUSG00000071660	899.144	643.803	1154.49	1.79323	0.84256	4.41022e-07	0.000129837	19	8786439	8796697	-	3984	Ttc9c	-	-	-	S	0IW5S;0VGKC;0A5UF;13PVD;1B2NN;1D23N;0USI2;0DSSZ;195VR	tetratricopeptide repeat domain 9C [Source:MGI Symbol;Acc:MGI:1917637]	70387	Q810A3
ENSMUSG00000020023	2848.01	1974.35	3721.67	1.88501	0.914574	4.47746e-07	0.000129837	10	94147811	94426818	+	7153	Tmcc3	GO:0005783;GO:0005783;GO:0005783;GO:0005789;GO:0008150;GO:0012505;GO:0016020;GO:0016021;GO:0042802;GO:0042802;GO:0071889;GO:0071889;GO:0005783;GO:0005783;GO:0005789;GO:0008150;GO:0012505;GO:0016020;GO:0016021;GO:0042802;GO:0071889;GO:0005783;GO:0005783;GO:0005789;GO:0008150;GO:0012505;GO:0016020;GO:0016021;GO:0042802;GO:0071889;GO:0005783;GO:0005783;GO:0005789;GO:0008150;GO:0012505;GO:0016020;GO:…	-	-	S;B	1CSA1;0DF1T;0V4QT;09TRG;12P0G;KOG3850;18WZQ;0UNMI;1AXA5	transmembrane and coiled coil domains 3 [Source:MGI Symbol;Acc:MGI:2442900]	319880	Q8R310
ENSMUSG00000028378	935.791	1199.45	672.132	0.560366	-0.835558	4.60499e-07	0.000130917	4	58965439	58987119	-	2296	Ptgr1	GO:0005737;GO:0005737;GO:0006629;GO:0006631;GO:0006693;GO:0006693;GO:0006693;GO:0006693;GO:0016491;GO:0016491;GO:0032440;GO:0032440;GO:0035798;GO:0035798;GO:0035798;GO:0035798;GO:0036102;GO:0036132;GO:0036132;GO:0036132;GO:0036132;GO:0036185;GO:0047522;GO:0047522;GO:0047522;GO:0055114;GO:0055114;GO:0097257;GO:0097327;GO:2001302;	K13948	-	S;C;L	18WTV;1CXN8;12SKN;0DMT6;0VBZ5;0UG21;09U09;1AYY2;KOG1196	prostaglandin reductase 1 [Source:MGI Symbol;Acc:MGI:1914353]	67103	Q91YR9
ENSMUSG00000037860	894.711	566.293	1223.13	2.15989	1.11095	5.04184e-07	0.00014058	1	173178445	173293606	+	3501	Aim2	GO:0002218;GO:0002218;GO:0002218;GO:0002218;GO:0002218;GO:0002230;GO:0002376;GO:0003677;GO:0003690;GO:0003690;GO:0003690;GO:0003690;GO:0005515;GO:0005634;GO:0005654;GO:0005654;GO:0005737;GO:0005737;GO:0005737;GO:0005739;GO:0005739;GO:0005829;GO:0005829;GO:0005829;GO:0006915;GO:0006954;GO:0032088;GO:0032088;GO:0032731;GO:0032731;GO:0032731;GO:0033209;GO:0033209;GO:0035458;GO:0035458;GO:0035458;GO:…	K12966	-	K	1CTDT;0UM8D;0DINX;0J5NP;19329;1408X;0V89T;1AWCC;09XBF	absent in melanoma 2 [Source:MGI Symbol;Acc:MGI:2686159]	383619	Q91VJ1
ENSMUSG00000052760	846.034	486.458	1205.61	2.47834	1.30938	5.28239e-07	0.000141027	1	85644804	85706364	-	2709	A630001G21Rik	GO:0000981;GO:0005634;GO:0005634;GO:0006357;GO:0000981;GO:0005634;GO:0005634;GO:0006357;GO:0000981;GO:0005634;GO:0005634;GO:0006357;	-	-	O	KOG2177;1B6NQ;0AA1F;196C6;0VKZ9;146EI;0DVM7;1D59D;0UWCK	RIKEN cDNA A630001G21 gene [Source:MGI Symbol;Acc:MGI:2443131]	319997	Q3UTB2
ENSMUSG00000033799	1294.47	934.088	1654.85	1.77162	0.82507	5.30423e-07	0.000141027	13	3616035	3661108	-	12454	Tasor2	GO:0003674;GO:0005654;GO:0005829;GO:0008150;	-	-	O	0A3B5;1CTWU;0UIHP;0II9C;18WRM;0VE61;12Z4D;0DJ4Z;1AXA9	transcription activation suppressor family member 2 [Source:MGI Symbol;Acc:MGI:2145274]	105203	Q5DTT3
ENSMUSG00000034575	3415.06	2569.78	4260.33	1.65786	0.729318	5.38474e-07	0.000141027	13	69646078	69682736	-	8918	Tent4a	GO:0004652;GO:0005654;GO:0005794;GO:0016779;GO:0031965;GO:0043631;GO:0000166;GO:0004652;GO:0004652;GO:0004652;GO:0005524;GO:0005634;GO:0005634;GO:0005654;GO:0005654;GO:0005730;GO:0005737;GO:0005794;GO:0006397;GO:0016740;GO:0016779;GO:0016779;GO:0031123;GO:0031499;GO:0031965;GO:0042493;GO:0043631;GO:0046872;GO:0060212;GO:0060212;GO:0070568;GO:0070568;GO:0071076;GO:0071076;GO:1905870;GO:1905870;GO:…	K03514	EC:2.7.7.19	L	12R8T;1AXRX;0DI9V;0UKQN;1CT0B;09WZB;KOG1906;0V7XC;18VWU	terminal nucleotidyltransferase 4A [Source:MGI Symbol;Acc:MGI:2682295]	210106	Q6PB75
ENSMUSG00000004105	205.199	286.812	123.586	0.430896	-1.21459	5.44693e-07	0.000141027	2	33106081	33137729	+	6286	Angptl2	GO:0001525;GO:0005102;GO:0005576;GO:0005615;GO:0005615;GO:0062023;	-	-	S;T;E	0DH5X;1B35P;1CRW5;13DWM;0V6W2;0UNZ8;KOG2579;09VXJ;18XZR	angiopoietin-like 2 [Source:MGI Symbol;Acc:MGI:1347002]	26360	Q9R045
ENSMUSG00000010358	873.342	578.136	1168.55	2.02123	1.01524	5.69889e-07	0.000144962	11	101339233	101349524	+	1727	Ifi35	GO:0002281;GO:0002281;GO:0003674;GO:0005615;GO:0005615;GO:0005634;GO:0005634;GO:0005634;GO:0005634;GO:0005737;GO:0005737;GO:0005829;GO:0005829;GO:0008150;GO:0008285;GO:0008285;GO:0016020;GO:0016020;GO:0034145;GO:0034145;GO:0042802;GO:0042802;GO:0045089;GO:0045089;GO:0050729;GO:0050729;GO:1901223;GO:1901223;GO:1901224;	-	-	S	0DSJT;18XJ2;0VFDU;0A55W;1CQNF;13TTM;0UM6N;0IZG7;1AWNB	interferon-induced protein 35 [Source:MGI Symbol;Acc:MGI:1917360]	70110	Q9D8C4
ENSMUSG00000024066	7507.5	5707.25	9307.75	1.63086	0.705635	5.81231e-07	0.000145298	17	74190890	74257191	-	9175	Xdh	GO:0016491;GO:0055114;GO:0001933;GO:0001933;GO:0001937;GO:0001937;GO:0004854;GO:0004854;GO:0004854;GO:0004854;GO:0004854;GO:0004855;GO:0004855;GO:0004855;GO:0004855;GO:0005506;GO:0005515;GO:0005576;GO:0005615;GO:0005615;GO:0005737;GO:0005777;GO:0005829;GO:0005829;GO:0006150;GO:0006151;GO:0006919;GO:0006919;GO:0007595;GO:0009055;GO:0009115;GO:0009115;GO:0009115;GO:0009115;GO:0010044;GO:0010629;GO:…	K00106	-	F	09X8X;18ZTZ;0DI1X;KOG0430;1CTYV;12QCG;0UKEV;1AVXM;0V8S8	xanthine dehydrogenase [Source:MGI Symbol;Acc:MGI:98973]	22436	Q00519;Q9CVF2
ENSMUSG00000031129	476.863	326.338	627.388	1.92251	0.942988	6.13083e-07	0.000150663	9	94551962	95112498	+	5679	Slc9a9	GO:0005768;GO:0005886;GO:0006811;GO:0006812;GO:0006814;GO:0006814;GO:0006885;GO:0015297;GO:0015299;GO:0015385;GO:0015385;GO:0015386;GO:0016020;GO:0016021;GO:0016021;GO:0031902;GO:0051453;GO:0055037;GO:0055037;GO:0055037;GO:0055085;GO:0071805;GO:0098656;GO:0098719;GO:1902600;	K14725	-	P	1B1WM;09V6X;0URVE;0VA1J;KOG1965;12QN3;0DGUJ;1903F;1CUGT	solute carrier family 9 (sodium/hydrogen exchanger), member 9 [Source:MGI Symbol;Acc:MGI:2679732]	331004	Q8BZ00
ENSMUSG00000090125	52.1304	18.5301	85.7306	4.62655	2.20994	6.29348e-07	0.000152082	4	124550600	124554448	+	3849	Pou3f1	GO:0000785;GO:0000978;GO:0000981;GO:0000981;GO:0000981;GO:0003677;GO:0003677;GO:0003677;GO:0003700;GO:0005634;GO:0005634;GO:0005634;GO:0005654;GO:0005667;GO:0006355;GO:0006357;GO:0006357;GO:0007420;GO:0008544;GO:0010628;GO:0014044;GO:0022011;GO:0030216;GO:0030900;GO:0042552;GO:0043565;GO:0043565;GO:0045893;GO:0045944;GO:1990837;	K09365	-	K	KOG3802;12SB4;0UUR4;0V6VN;1B59R;1CXDW;0DNGH;09VX7	POU domain, class 3, transcription factor 1 [Source:MGI Symbol;Acc:MGI:101896]	18991	P21952;Q3UTH6
ENSMUSG00000019866	2220.76	1422.9	3018.62	2.12146	1.08505	6.51196e-07	0.000154782	10	43826632	44024849	-	7799	Crybg1	GO:0003674;GO:0005575;GO:0008150;GO:0003674;GO:0005575;GO:0008150;GO:0003674;GO:0005575;GO:0008150;	-	-	S	0V692;18Y7Y;0DGI7;1CR7Y;0IERF;0UNQW;136MA;1AY7C;09V9T	crystallin beta-gamma domain containing 1 [Source:MGI Symbol;Acc:MGI:109544]	11630	-
ENSMUSG00000039116	2110.06	1573.04	2647.07	1.68277	0.750838	6.68696e-07	0.000156378	10	14278327	14421403	-	12228	Adgrg6	GO:0004888;GO:0004930;GO:0004930;GO:0004930;GO:0004930;GO:0005515;GO:0005518;GO:0005737;GO:0005886;GO:0005886;GO:0005887;GO:0007005;GO:0007165;GO:0007166;GO:0007166;GO:0007186;GO:0007186;GO:0007189;GO:0007189;GO:0009986;GO:0014037;GO:0016020;GO:0016020;GO:0016021;GO:0016021;GO:0019933;GO:0019933;GO:0022011;GO:0022011;GO:0042552;GO:0042552;GO:0043236;GO:0043236;GO:0050840;GO:0060347;GO:0060347;GO:…	K08463	-	O;T	0URCV;1CRRY;KOG3714;12R5K;1B35H;09VTE;0V6S6;0DH1R;KOG4193;1928V	adhesion G protein-coupled receptor G6 [Source:MGI Symbol;Acc:MGI:1916151]	215798	Q6F3F9
ENSMUSG00000055485	368.455	503.55	233.36	0.46343	-1.10958	6.82233e-07	0.000157011	2	156857719	156921174	-	7984	Soga1	GO:0005615;GO:0005615;GO:0010506;	-	-	S	KOG4787;13KG2;0VA5R;1CVJ2;0DK21;1AX5T;0UPQU;09Z8E;1907F	suppressor of glucose, autophagy associated 1 [Source:MGI Symbol;Acc:MGI:2444575]	320706	A2ACV6
ENSMUSG00000020709	1613.12	1032.26	2193.99	2.12543	1.08776	7.40374e-07	0.000165492	11	80044931	80069784	+	1785	Adap2	GO:0005096;GO:0005096;GO:0005545;GO:0005546;GO:0005546;GO:0005547;GO:0005547;GO:0005737;GO:0005737;GO:0005740;GO:0005740;GO:0005886;GO:0005886;GO:0005886;GO:0007507;GO:0016020;GO:0016020;GO:0043231;GO:0043325;GO:0043325;GO:0043533;GO:0043533;GO:0043547;GO:0046872;GO:0048017;GO:1902936;GO:0005096;GO:0043547;	K23781	-	T	09XNT;KOG0703;12PIM;1CTS1;0USDS;18WUF;0V8KG;1B47T;0DJ0J	ArfGAP with dual PH domains 2 [Source:MGI Symbol;Acc:MGI:2663075]	216991	Q8R2V5;Q5SSK2
ENSMUSG00000078606	856.648	499.431	1213.87	2.4305	1.28125	7.41912e-07	0.000165492	7	105544346	105603174	-	9275	Gvin2	GO:0000166;GO:0003674;GO:0005525;GO:0005525;GO:0005575;GO:0005634;GO:0005737;GO:0005829;GO:0008150;GO:0000166;GO:0003674;GO:0005525;GO:0005525;GO:0005575;GO:0005634;GO:0005737;GO:0005829;GO:0008150;GO:0003674;GO:0005575;GO:0008150;	-	-	S	1ATYP;0V6A8;09VAY;191XB;0IG57;0UIDG;12RX4;1CR98;0DGJE	GTPase, very large interferon inducible, family member 2 [Source:MGI Symbol;Acc:MGI:3782245]	100042856	Q80SU7
ENSMUSG00000105504	14768.1	10480.2	19056.1	1.81829	0.862579	8.36287e-07	0.000183717	3	142199739	142228105	+	6637	Gbp5	GO:0000139;GO:0000166;GO:0002376;GO:0003924;GO:0003924;GO:0005515;GO:0005525;GO:0005525;GO:0005525;GO:0005737;GO:0005737;GO:0005794;GO:0005794;GO:0006954;GO:0009617;GO:0016020;GO:0016787;GO:0031410;GO:0031410;GO:0032611;GO:0032621;GO:0034067;GO:0042802;GO:0042803;GO:0045089;GO:0048471;GO:0051289;GO:0051289;GO:0071346;GO:0071346;GO:1900017;GO:1900227;GO:1900227;GO:0003924;GO:0005525;GO:0005794;GO:…	K20898	-	S;K	0V5RR;0DG1U;09US8;18XUQ;1ASMB;KOG2037;1CQRC;0UHMY;13NFW	guanylate binding protein 5 [Source:MGI Symbol;Acc:MGI:2429943]	229898	Q8CFB4;Q8BMN7
ENSMUSG00000037731	2772.06	1223.58	4320.54	3.53106	1.8201	8.71865e-07	0.000188674	4	132509154	132523698	-	3079	Themis2	GO:0002376;GO:0005515;GO:0005634;GO:0005634;GO:0005737;GO:0005737;GO:0006954;GO:0050852;GO:0050852;	-	-	T	0UK75;1CSM7;13N0X;0V7A3;19562;0IF5X;1B4FP;09WD4;0DHWK	thymocyte selection associated family member 2 [Source:MGI Symbol;Acc:MGI:2446213]	230787	Q91YX0
ENSMUSG00000031934	389.559	516.262	262.856	0.509152	-0.973831	9.10618e-07	0.000194163	9	14913424	14956774	-	6030	Panx1	GO:0001819;GO:0002020;GO:0002020;GO:0002931;GO:0003779;GO:0005102;GO:0005102;GO:0005198;GO:0005198;GO:0005198;GO:0005243;GO:0005243;GO:0005262;GO:0005262;GO:0005262;GO:0005515;GO:0005783;GO:0005783;GO:0005783;GO:0005789;GO:0005886;GO:0005886;GO:0005886;GO:0005886;GO:0005886;GO:0005921;GO:0006811;GO:0006812;GO:0006812;GO:0006812;GO:0006812;GO:0006816;GO:0006816;GO:0006816;GO:0007267;GO:0007267;GO:…	K03443	-	P	0UHQP;1AV52;0DQS6;0II5X;1CZVM;18V4U;0A34P;13CN4;0VDZP	pannexin 1 [Source:MGI Symbol;Acc:MGI:1860055]	55991	Q9JIP4
ENSMUSG00000037242	39320.4	30243.5	48397.3	1.60026	0.678303	9.62098e-07	0.000197348	4	134941280	135000125	-	6572	Clic4	GO:0001525;GO:0001525;GO:0001886;GO:0005244;GO:0005254;GO:0005254;GO:0005254;GO:0005515;GO:0005634;GO:0005634;GO:0005737;GO:0005737;GO:0005737;GO:0005739;GO:0005739;GO:0005739;GO:0005739;GO:0005813;GO:0005813;GO:0005829;GO:0005829;GO:0005886;GO:0005886;GO:0005886;GO:0005902;GO:0005902;GO:0005911;GO:0005911;GO:0006811;GO:0006821;GO:0006821;GO:0007035;GO:0009566;GO:0009986;GO:0009986;GO:0015630;GO:…	K05024	-	P	KOG1422;13HTJ;0DKFR;0V9Y1;1B595;1CRYR;0UIAQ;18ZDF;09Z0K	chloride intracellular channel 4 (mitochondrial) [Source:MGI Symbol;Acc:MGI:1352754]	29876	Q9QYB1;Q543N5
ENSMUSG00000031015	3792.25	2877.7	4706.81	1.63561	0.709833	9.62294e-07	0.000197348	7	109820918	109882713	+	8090	Swap70	GO:0003677;GO:0003677;GO:0005515;GO:0005524;GO:0005634;GO:0005634;GO:0005634;GO:0005737;GO:0005737;GO:0005737;GO:0005737;GO:0005856;GO:0005886;GO:0005886;GO:0005886;GO:0007204;GO:0008064;GO:0015629;GO:0015629;GO:0016020;GO:0016444;GO:0030027;GO:0030835;GO:0032233;GO:0032880;GO:0033633;GO:0042995;GO:0045190;GO:0051017;GO:0060754;GO:1902309;	K20072	-	Z;T	190PA;1ATFK;1CQWQ;139RA;09UXN;0IIJW;0V5XK;0DG77;0UHVP	SWA-70 protein [Source:MGI Symbol;Acc:MGI:1298390]	20947	Q6A028
ENSMUSG00000040328	261.59	123.147	400.032	3.24841	1.69973	9.70934e-07	0.000197348	11	48869716	49026214	+	4724	Olfr56	GO:0004930;GO:0004930;GO:0004984;GO:0004984;GO:0005886;GO:0007165;GO:0007186;GO:0007186;GO:0007186;GO:0007608;GO:0007608;GO:0016020;GO:0016021;GO:0016021;GO:0016021;GO:0050896;GO:0050911;GO:0004930;GO:0004930;GO:0004984;GO:0004984;GO:0005886;GO:0007165;GO:0007186;GO:0007186;GO:0007186;GO:0007608;GO:0007608;GO:0016020;GO:0016021;GO:0016021;GO:0016021;GO:0050896;GO:0050911;GO:0004930;GO:0004930;GO:…	K04257	-	T	13NSQ;0A1JS;0VCFD;1CT4I;1B3NR;0DP7S;0USKG;194G3;0IJNK	olfactory receptor 56 [Source:MGI Symbol;Acc:MGI:1333785]	18356	Q8VGD6
ENSMUSG00000026088	565.25	396.482	734.018	1.85133	0.888561	9.80003e-07	0.000197348	1	37913882	37929492	-	2770	Mitd1	GO:0000281;GO:0005768;GO:0007049;GO:0016020;GO:0019898;GO:0019904;GO:0030496;GO:0030496;GO:0031902;GO:0032091;GO:0035091;GO:0042802;GO:0043231;GO:0051301;GO:0061952;GO:0000281;GO:0000281;GO:0005768;GO:0007049;GO:0016020;GO:0019898;GO:0019898;GO:0019904;GO:0019904;GO:0030496;GO:0030496;GO:0030496;GO:0031902;GO:0032091;GO:0032091;GO:0035091;GO:0035091;GO:0042802;GO:0042802;GO:0043231;GO:0043231;GO:…	-	-	S;O;W	1CSPD;1923Y;0V7MP;09WP3;0DHYS;12SG6;1AVSV;0UKAN;KOG4509	MIT, microtubule interacting and transport, domain containing 1 [Source:MGI Symbol;Acc:MGI:1916278]	69028	Q8VDV8
ENSMUSG00000050565	9067.01	6294.37	11839.6	1.88099	0.911492	9.99345e-07	0.000198486	1	155911149	155944607	+	9218	Tor1aip2	GO:0001671;GO:0001671;GO:0001671;GO:0005515;GO:0005634;GO:0005635;GO:0005783;GO:0005783;GO:0005783;GO:0005789;GO:0007029;GO:0007029;GO:0007029;GO:0016020;GO:0016021;GO:0032781;GO:0032781;GO:0032781;GO:0051117;GO:0051117;GO:0090435;GO:0090435;GO:0001671;GO:0005515;GO:0005783;GO:0007029;GO:0032781;GO:0051117;GO:0090435;GO:0001671;GO:0005515;GO:0005783;GO:0007029;GO:0032781;GO:0051117;GO:0090435;GO:…	K11794	-	S;U	18W26;0IJUB;0UM0S;0V845;1CT7B;13NQE;0A10Q;1AWGU;0DNN8;0A6MG;1D2YU;0VHFM;0UUY8;0IWR7;192WK;0DTMB;13QR1;1B5JD	torsin A interacting protein 2 [Source:MGI Symbol;Acc:MGI:3582695]	240832	Q9ER81
ENSMUSG00000039531	1916.62	1216.59	2616.64	2.1508	1.10487	1.03613e-06	0.000203011	10	33795138	33827265	-	9072	Zup1	GO:0004843;GO:0005634;GO:0005634;GO:0005737;GO:0006508;GO:0010468;GO:0016787;GO:0018215;GO:0046872;GO:0004843;GO:0005634;GO:0005634;GO:0005737;GO:0006508;GO:0010468;GO:0016787;GO:0018215;GO:0046872;GO:0004843;GO:0006508;GO:0018215;GO:0004843;GO:0005634;GO:0005634;GO:0005737;GO:0006508;GO:0010468;GO:0016787;GO:0018215;GO:0046872;GO:0004843;GO:0005634;GO:0005634;GO:0005737;GO:0006508;GO:0010468;GO:…	K24134	EC:3.4.19.12	S;J	1AUZ3;18YT7;0DJ59;0V8QT;09XT6;12TWJ;0UU14;1CTX4;KOG4696	zinc finger containing ubiquitin peptidase 1 [Source:MGI Symbol;Acc:MGI:1919830]	72580	Q3T9Z9
ENSMUSG00000036867	224.856	319.184	130.527	0.40894	-1.29004	1.11334e-06	0.000215231	9	63860358	63929341	-	3205	Smad6	GO:0000785;GO:0000976;GO:0000976;GO:0000976;GO:0001657;GO:0003148;GO:0003170;GO:0003180;GO:0003180;GO:0003183;GO:0003184;GO:0003281;GO:0003677;GO:0003682;GO:0003682;GO:0003682;GO:0005515;GO:0005515;GO:0005634;GO:0005634;GO:0005634;GO:0005654;GO:0005654;GO:0005667;GO:0005794;GO:0005794;GO:0005829;GO:0005829;GO:0006355;GO:0006955;GO:0006955;GO:0007179;GO:0007179;GO:0007352;GO:0007352;GO:0008285;GO:…	K04677	-	T;K	0DH25;KOG3701;18X5I;1CRSC;12QX6;0V6SJ;1B4Y6;0UTWP;09VTT	SMAD family member 6 [Source:MGI Symbol;Acc:MGI:1336883]	17130	O35182
ENSMUSG00000006134	1909.53	1430.48	2388.58	1.66977	0.739652	1.14667e-06	0.000218757	16	17269851	17305298	+	5042	Crkl	GO:0000187;GO:0001558;GO:0001568;GO:0001655;GO:0001764;GO:0001783;GO:0001784;GO:0001784;GO:0001933;GO:0001933;GO:0001934;GO:0001934;GO:0002685;GO:0003151;GO:0005515;GO:0005654;GO:0005654;GO:0005737;GO:0005737;GO:0005829;GO:0005829;GO:0005829;GO:0006629;GO:0007283;GO:0007338;GO:0007389;GO:0007416;GO:0007507;GO:0008284;GO:0008284;GO:0008543;GO:0008584;GO:0009887;GO:0009952;GO:0010468;GO:0010629;GO:…	K04438	-	T	18UIR;0V69B;1ASF9;0DGIG;KOG4792;12ZTM;1CR8A;09VA3;0UQ02	v-crk avian sarcoma virus CT10 oncogene homolog- like [Source:MGI Symbol;Acc:MGI:104686]	12929	P47941;A2RS58
ENSMUSG00000058163	1617.45	820.815	2414.09	2.94109	1.55635	1.16967e-06	0.000220248	11	48778249	48793041	-	3862	Gm5431	GO:0003924;GO:0005525;GO:0005789;GO:0006952;GO:0016020;GO:0035458;GO:0003924;GO:0005525;GO:0005789;GO:0006952;GO:0016020;GO:0035458;GO:0003924;GO:0005525;GO:0005789;GO:0006952;GO:0016020;GO:0035458;	K17072	-	S	0VBXP;13J01;0DQAB;0USXH;1B4GM;0A2NU;1927P;1CZCD;0IJSM	predicted gene 5431 [Source:MGI Symbol;Acc:MGI:3645205]	432555	A6PWD6;Q3TMS7
ENSMUSG00000029298	1674.36	762.065	2586.66	3.39427	1.7631	1.20654e-06	0.000224278	5	105225496	105287405	-	5173	Gbp9	GO:0003924;GO:0003924;GO:0005525;GO:0005525;GO:0005794;GO:0020005;GO:0031410;GO:0031410;GO:0042832;GO:0042832;GO:0044406;GO:0050830;GO:0050830;GO:0071346;GO:0071346;GO:0003924;GO:0003924;GO:0005525;GO:0005525;GO:0005794;GO:0020005;GO:0031410;GO:0031410;GO:0042832;GO:0042832;GO:0044406;GO:0050830;GO:0050830;GO:0071346;GO:0071346;	K20908	-	O;T;D;C;K	0V9BC;134KU;09XSJ;KOG2037;0DJTQ	guanylate-binding protein 9 [Source:MGI Symbol;Acc:MGI:3605620]	236573	Q8BTS3
ENSMUSG00000042772	1747.41	1308.32	2186.49	1.67122	0.740901	1.28195e-06	0.000232448	1	152712746	152778397	-	6341	Smg7	GO:0000184;GO:0000184;GO:0005634;GO:0005634;GO:0005634;GO:0005697;GO:0005737;GO:0005737;GO:0005737;GO:0005829;GO:0042162;GO:0042162;GO:0045111;GO:0051721;GO:0051721;GO:0070034;GO:0000184;GO:0000184;GO:0005634;GO:0005634;GO:0005634;GO:0005634;GO:0005697;GO:0005737;GO:0005737;GO:0005737;GO:0005737;GO:0005829;GO:0005829;GO:0042162;GO:0042162;GO:0042162;GO:0045111;GO:0045111;GO:0051721;GO:0051721;GO:…	K14409	-	A	0INQX;1BAT5;0V2V5;0E7TV;1DETN;0WG34;0B3P4;19734;13BTQ	Smg-7 homolog, nonsense mediated mRNA decay factor (C. elegans) [Source:MGI Symbol;Acc:MGI:2682334]	226517	Q5RJH6
ENSMUSG00000049502	5571.61	4263.41	6879.81	1.61369	0.690362	1.28256e-06	0.000232448	16	35746881	35759521	-	5725	Dtx3l	GO:0002230;GO:0002230;GO:0002376;GO:0004842;GO:0004842;GO:0004842;GO:0004857;GO:0004857;GO:0005634;GO:0005634;GO:0005634;GO:0005654;GO:0005654;GO:0005654;GO:0005737;GO:0005737;GO:0005737;GO:0005764;GO:0005764;GO:0005764;GO:0005765;GO:0005768;GO:0005769;GO:0005769;GO:0005829;GO:0005829;GO:0006281;GO:0006302;GO:0006302;GO:0006302;GO:0006325;GO:0006511;GO:0006511;GO:0006974;GO:0006974;GO:0006974;GO:…	K06058	EC:2.3.2.27	O;L	0UK74;1AX70;0IEH5;0A43V;1D0VZ;0VEYR;13NAY;0DN4G;191RG	deltex 3-like, E3 ubiquitin ligase [Source:MGI Symbol;Acc:MGI:2656973]	209200	Q3UIR3
ENSMUSG00000066861	2377.04	1420.98	3333.1	2.34564	1.22998	1.30571e-06	0.000233721	5	121014205	121025676	-	2340	Oas1g	GO:0001730;GO:0001730;GO:0001730;GO:0001730;GO:0002376;GO:0003723;GO:0003725;GO:0003725;GO:0003725;GO:0005634;GO:0005654;GO:0005654;GO:0005737;GO:0005737;GO:0005829;GO:0005829;GO:0016020;GO:0016779;GO:0045071;GO:0045087;GO:0051607;GO:0051607;GO:0051607;GO:0060700;GO:0001730;GO:0001730;GO:0001730;GO:0001730;GO:0002376;GO:0003723;GO:0003725;GO:0003725;GO:0003725;GO:0003725;GO:0005634;GO:0005654;GO:…	K14216	EC:2.7.7.84	H;J;O	0DF4M;0V4TK;1CP6T;KOG0001;09TUC;0UM27;1AT0Y;12QYV;18U5V	2'-5' oligoadenylate synthetase 1G [Source:MGI Symbol;Acc:MGI:97429]	23960	Q8K469
ENSMUSG00000032690	4809.11	3369.58	6248.64	1.85443	0.890974	1.5241e-06	0.000269487	5	120868398	120887918	-	4451	Oas2	GO:0000166;GO:0001730;GO:0001730;GO:0001730;GO:0001730;GO:0002376;GO:0003723;GO:0003725;GO:0003725;GO:0003725;GO:0005524;GO:0005524;GO:0005654;GO:0005737;GO:0005737;GO:0005829;GO:0006401;GO:0009615;GO:0009617;GO:0016020;GO:0016740;GO:0016779;GO:0016779;GO:0045071;GO:0045087;GO:0046872;GO:0048471;GO:0048471;GO:0051607;GO:0051607;GO:0051607;GO:0060337;GO:0060700;GO:1903487;GO:0000166;GO:0001730;GO:…	K14216	EC:2.7.7.84	J;O	0DF4M;0V4TK;1CP6T;KOG0001;0UKKA;1AW2R;09TUC;12QYV	2'-5' oligoadenylate synthetase 2 [Source:MGI Symbol;Acc:MGI:2180852]	246728	E9Q9A9
ENSMUSG00000041649	283.187	171.618	394.755	2.3002	1.20176	1.62094e-06	0.000283157	X	152020462	152179128	+	5206	Klf8	GO:0000122;GO:0000122;GO:0000785;GO:0000978;GO:0000978;GO:0000978;GO:0000981;GO:0001227;GO:0001227;GO:0003677;GO:0003677;GO:0005634;GO:0005654;GO:0005654;GO:0005829;GO:0005829;GO:0006357;GO:0016235;GO:0016235;GO:0046872;GO:0000122;GO:0000785;GO:0000978;GO:0000978;GO:0000981;GO:0001227;GO:0003677;GO:0003677;GO:0005634;GO:0005654;GO:0005829;GO:0006357;GO:0016235;GO:0046872;	K09205	-	K	1CY09;1ARQG;13KRT;0VCAC;0DP2B;18SGH;KOG1721;0A090;0UQGV	Kruppel-like factor 8 [Source:MGI Symbol;Acc:MGI:2442430]	245671	Q8BLM0
ENSMUSG00000029640	4269.57	3114.86	5424.28	1.74142	0.800264	1.70774e-06	0.0002937	5	146671619	146731816	-	4639	Usp12	GO:0004197;GO:0004197;GO:0004197;GO:0004197;GO:0004843;GO:0004843;GO:0004843;GO:0004843;GO:0004843;GO:0005634;GO:0005634;GO:0005829;GO:0005829;GO:0006508;GO:0006511;GO:0008233;GO:0008234;GO:0016579;GO:0016579;GO:0016579;GO:0016579;GO:0016579;GO:0016787;GO:0018215;GO:0046872;GO:0050862;GO:0101005;	K11842	EC:3.4.19.12	O	12R4Z;KOG1864;0DFZU;0UMGZ;09UPY;1CTKJ;0V5PJ;1AWZJ;18T3E	ubiquitin specific peptidase 12 [Source:MGI Symbol;Acc:MGI:1270128]	22217	Q9D9M2
ENSMUSG00000026655	830.527	604.361	1056.69	1.74845	0.806074	1.72297e-06	0.0002937	2	3571525	3783179	+	4329	Fam107b	GO:0003674;GO:0005575;GO:0007605;GO:0003674;GO:0005575;GO:0007605;GO:0003674;GO:0005575;GO:0007605;GO:0003674;GO:0005575;GO:0007605;	-	-	S	0A4Y8;1B1S7;0UUHH;0VFTB;192WB;0DQ65;1D1NV;0IVZ4;13QDH	family with sequence similarity 107, member B [Source:MGI Symbol;Acc:MGI:1913790]	66540	Q3TGF2
ENSMUSG00000022035	846.484	599.568	1093.4	1.82365	0.866826	1.74207e-06	0.0002937	14	66074751	66104056	+	4897	Ccdc25	GO:0003674;GO:0008150;	-	-	S;P	0DPE1;0USGY;0VCMB;191ZU;KOG3272;1CYBT;1AXES;0A1RR;13N04	coiled-coil domain containing 25 [Source:MGI Symbol;Acc:MGI:1914429]	67179	Q78PG9;A0PK78
ENSMUSG00000032596	2219.68	1472.84	2966.52	2.01415	1.01017	1.80775e-06	0.00030127	9	107852704	107861259	+	6692	Uba7	GO:0000166;GO:0004839;GO:0004842;GO:0005524;GO:0005634;GO:0005737;GO:0006464;GO:0006464;GO:0006464;GO:0006974;GO:0008641;GO:0016567;GO:0016874;GO:0018215;GO:0019782;GO:0019782;GO:0019782;GO:0019941;GO:0032020;GO:0032020;GO:0032020;GO:0032446;GO:0004842;GO:0005634;GO:0005737;GO:0006464;GO:0006464;GO:0006974;GO:0008641;GO:0016567;GO:0018215;GO:0019782;GO:0019782;GO:0019941;GO:0032020;GO:0032020;GO:…	K10698	EC:6.2.1.45	O	KOG2012;1AZKU;18XQE;0V8UH;0UQ73;1CYJA;0DNZ7;09YC0;12PN3	ubiquitin-like modifier activating enzyme 7 [Source:MGI Symbol;Acc:MGI:1349462]	74153	Q9DBK7
ENSMUSG00000038179	10281.7	6451.43	14112	2.18742	1.12923	2.10448e-06	0.000346737	1	171459971	171480603	-	4577	Slamf7	GO:0016020;GO:0016021;GO:0016020;GO:0016021;GO:0016020;GO:0016021;GO:0016020;GO:0016021;	K06733	-	T;U	13I4Z;192R3;0V886;0DIM9;1AUM9;1CTC4;0IJW6;09X9V;0UJ49	SLAM family member 7 [Source:MGI Symbol;Acc:MGI:1922595]	75345	Q8BHK6;A0A0R4J2D8
ENSMUSG00000030275	5116.69	3270.15	6963.24	2.12934	1.0904	2.15938e-06	0.000348608	6	143112947	143178033	+	14151	Etnk1	GO:0004305;GO:0006646;GO:0000166;GO:0004305;GO:0004305;GO:0005524;GO:0005654;GO:0005737;GO:0005829;GO:0005886;GO:0006629;GO:0006646;GO:0006646;GO:0008654;GO:0016301;GO:0016310;GO:0016740;	K00894	EC:2.7.1.82	I	0UH22;194XB;0V58M;KOG4720;1CQ8X;09U9G;0DFJ5;13I1V;1AXAD	ethanolamine kinase 1 [Source:MGI Symbol;Acc:MGI:1922570]	75320	Q9D4V0
ENSMUSG00000036986	2402.02	1341.35	3462.7	2.58151	1.36821	2.16392e-06	0.000348608	9	58125359	58157069	-	5571	Pml	GO:0000781;GO:0000781;GO:0000785;GO:0000792;GO:0001666;GO:0001666;GO:0001666;GO:0001932;GO:0002230;GO:0002376;GO:0003677;GO:0003713;GO:0003713;GO:0004842;GO:0005515;GO:0005515;GO:0005515;GO:0005634;GO:0005634;GO:0005634;GO:0005634;GO:0005654;GO:0005654;GO:0005654;GO:0005654;GO:0005730;GO:0005730;GO:0005730;GO:0005737;GO:0005737;GO:0005737;GO:0005768;GO:0005783;GO:0005789;GO:0005829;GO:0006355;GO:…	K10054	-	O;K	KOG2177;13KR7;0DQPD;1B3I5;0USQ3;1D0HI;0A3RJ;0V9DG;18VW0	promyelocytic leukemia [Source:MGI Symbol;Acc:MGI:104662]	18854	Q60953;A0A068EW80;Q8BSJ6
ENSMUSG00000062783	682.045	383.23	980.859	2.55946	1.35584	2.18897e-06	0.000348768	GL456221.1	111572	163011	-	2719	Csprs	GO:0004930;GO:0004930;GO:0007186;GO:0007186;GO:0016020;GO:0016021;GO:0016021;	-	-	S	13UU3;0VD9J;0J1CI;0DS8G;1D158;0UUEC;18ZRG;1B5A6;0A5E0	component of Sp100-rs [Source:NCBI gene (formerly Entrezgene);Acc:114564]	114564	Q8BYZ8
ENSMUSG00000038058	883.154	553.266	1213.04	2.19251	1.13258	2.25631e-06	0.000352015	6	54900934	54949597	-	5079	Nod1	GO:0000166;GO:0002221;GO:0002376;GO:0002606;GO:0005515;GO:0005524;GO:0005737;GO:0005737;GO:0005829;GO:0005886;GO:0006915;GO:0006919;GO:0006952;GO:0010942;GO:0016020;GO:0016045;GO:0016045;GO:0016323;GO:0016323;GO:0016324;GO:0032731;GO:0032755;GO:0032757;GO:0032760;GO:0032874;GO:0035556;GO:0035556;GO:0035556;GO:0038187;GO:0042742;GO:0042742;GO:0042802;GO:0042803;GO:0042981;GO:0043123;GO:0043280;GO:…	K08727	-	T;I	09X63;0V84K;1CT7S;KOG4308;0DIH8;191K0;12UCX;0UHMA;1AT7Y	nucleotide-binding oligomerization domain containing 1 [Source:MGI Symbol;Acc:MGI:1341839]	107607	Q8BHB0;Q540J8
ENSMUSG00000047098	2451.2	1825.61	3076.8	1.68536	0.753054	2.25791e-06	0.000352015	14	55829165	55841150	+	5734	Rnf31	GO:0000209;GO:0000209;GO:0004842;GO:0004842;GO:0004842;GO:0005515;GO:0005515;GO:0005737;GO:0005829;GO:0009898;GO:0009898;GO:0016567;GO:0016740;GO:0023035;GO:0031625;GO:0035631;GO:0042802;GO:0043123;GO:0043123;GO:0043123;GO:0043130;GO:0043130;GO:0046872;GO:0050852;GO:0050852;GO:0051092;GO:0051092;GO:0060546;GO:0071797;GO:0071797;GO:0071797;GO:0097039;GO:0097039;GO:0004842;GO:0016567;GO:0016740;GO:…	K11974	EC:2.3.2.31	O	0V9SQ;09YUV;KOG1812;18Z68;0UQXX;13HGC;0DIDS;1B0P8;1CV3M	ring finger protein 31 [Source:MGI Symbol;Acc:MGI:1934704]	268749	Q924T7
ENSMUSG00000056608	520.493	367.601	673.386	1.83184	0.873291	2.29602e-06	0.000354149	8	91554980	91781144	+	23148	Chd9	GO:0000166;GO:0003677;GO:0003678;GO:0004386;GO:0005524;GO:0005524;GO:0005634;GO:0005737;GO:0006325;GO:0008150;GO:0016787;GO:0032508;GO:0000166;GO:0003677;GO:0003678;GO:0004386;GO:0005524;GO:0005524;GO:0005634;GO:0005654;GO:0005737;GO:0005829;GO:0006325;GO:0008150;GO:0016787;GO:0032508;GO:0000166;GO:0003678;GO:0005524;GO:0005524;GO:0006325;GO:0032508;GO:0000166;GO:0003677;GO:0003678;GO:0004386;GO:…	K14438	EC:3.6.4.12	K	09W8R;0V5MX;1CQ2T;KOG0384;12PMF;0UKYE;195FW;0DMW2;1B4HB	chromodomain helicase DNA binding protein 9 [Source:MGI Symbol;Acc:MGI:1924001]	109151	Q8BYH8
ENSMUSG00000016496	11128.5	8633.71	13623.2	1.57791	0.658014	2.62413e-06	0.000400497	19	29344855	29365495	+	3622	Cd274	GO:0002250;GO:0002376;GO:0002845;GO:0002845;GO:0002845;GO:0005515;GO:0005515;GO:0005654;GO:0005768;GO:0005886;GO:0005886;GO:0005886;GO:0006955;GO:0006955;GO:0006955;GO:0007165;GO:0007165;GO:0007166;GO:0007166;GO:0007166;GO:0009897;GO:0009897;GO:0009986;GO:0009986;GO:0015629;GO:0016020;GO:0016021;GO:0030335;GO:0030335;GO:0031295;GO:0031295;GO:0031295;GO:0031901;GO:0031901;GO:0031901;GO:0032689;GO:…	K06745	-	T	09W7E;1CS6T;13QT3;1AVR7;18WQ4;0IIBU;0V75P;0DHGI;0UJ64	CD274 antigen [Source:MGI Symbol;Acc:MGI:1926446]	60533	Q9EP73;Q3U472
ENSMUSG00000098557	16183.1	12579.1	19787.1	1.57301	0.653529	2.70333e-06	0.000408287	14	103214017	103220073	-	6057	Kctd12	GO:0042802;GO:0051260;	K21918	-	-	-	potassium channel tetramerisation domain containing 12 [Source:MGI Symbol;Acc:MGI:2145823]	239217	Q6WVG3;A0A0R4J2B2;Q8C2V2;Q69ZA6
ENSMUSG00000078853	5184.78	2867.41	7502.15	2.61635	1.38756	3.25543e-06	0.000483329	11	58090382	58098417	+	2022	Igtp	GO:0003924;GO:0003924;GO:0005525;GO:0005789;GO:0005829;GO:0006952;GO:0016020;GO:0035458;GO:0035458;GO:0003924;GO:0003924;GO:0005789;GO:0005829;GO:0006952;GO:0035458;GO:0035458;GO:0003924;GO:0003924;GO:0005789;GO:0005829;GO:0006952;GO:0035458;GO:0035458;	K14140	-	-	-	interferon gamma induced GTPase [Source:MGI Symbol;Acc:MGI:107729]	16145	Q9DCE9
ENSMUSG00000045868	125.147	70.075	180.218	2.57179	1.36277	3.26686e-06	0.000483329	7	105755763	105814533	-	9005	Gvin1	GO:0005525;GO:0005634;GO:0005737;GO:0005525;GO:0005634;GO:0005737;	-	-	S	1ATYP;0V6A8;09VAY;191XB;0IG57;0UIDG;12RX4;1CR98;0DGJE	GTPase, very large interferon inducible 1 [Source:MGI Symbol;Acc:MGI:1921808]	74558	L7N451
ENSMUSG00000027959	152.492	90.3761	214.608	2.37461	1.24769	3.61046e-06	0.000528768	3	116388631	116424653	+	6121	Sass6	GO:0003674;GO:0005737;GO:0005813;GO:0005813;GO:0005814;GO:0005814;GO:0005815;GO:0005829;GO:0005856;GO:0007049;GO:0007099;GO:0007099;GO:0034451;GO:0051298;GO:0098536;GO:0003674;GO:0005737;GO:0005813;GO:0005813;GO:0005813;GO:0005814;GO:0005814;GO:0005814;GO:0005815;GO:0005829;GO:0005829;GO:0005856;GO:0007049;GO:0007099;GO:0007099;GO:0007099;GO:0034451;GO:0034451;GO:0051298;GO:0051298;GO:0098536;GO:…	K16487	-	Z;S;D	12PJ4;0V7NN;0IF03;0UKC1;18X15;1CSQI;1AW2P;09WQ5;0DHZW	SAS-6 centriolar assembly protein [Source:MGI Symbol;Acc:MGI:1920026]	72776	Q80UK7
ENSMUSG00000035929	1612.96	998.758	2227.15	2.22992	1.15699	3.65333e-06	0.000529696	17	35598593	35604266	+	2596	H2-Q4	GO:0002476;GO:0005102;GO:0005615;GO:0005783;GO:0005794;GO:0005797;GO:0005886;GO:0009897;GO:0009986;GO:0016020;GO:0016021;GO:0030881;GO:0042277;GO:0042605;GO:0042608;GO:0042610;GO:0042612;GO:0042824;GO:0044877;GO:0046977;GO:0062061;GO:0070971;	K06751	-	U	09WNN;0US52;0VB3S;1CU56;0II5V;194CQ;13KER;0DJCZ;1AX68	histocompatibility 2, Q region locus 4 [Source:MGI Symbol;Acc:MGI:95933]	15015	Q8HWB2;Q0WXH7
ENSMUSG00000024472	2482.88	1905.63	3060.13	1.60584	0.683328	4.04053e-06	0.000580037	18	44513569	44558036	+	8702	Dcp2	GO:0003723;GO:0016787;GO:0030145;GO:0000184;GO:0000184;GO:0000290;GO:0000290;GO:0000932;GO:0000932;GO:0000932;GO:0003723;GO:0003723;GO:0004534;GO:0005634;GO:0005654;GO:0005737;GO:0005737;GO:0006402;GO:0006402;GO:0016442;GO:0016787;GO:0016787;GO:0030054;GO:0030145;GO:0032211;GO:0036464;GO:0043488;GO:0043488;GO:0046872;GO:0050072;GO:0050072;GO:0050072;GO:0050072;GO:0071044;GO:0071044;GO:0090503;GO:…	K12613	EC:3.6.1.62	A	133BG;18W29;1ASQX;0UTVQ;0DRR6;1D0Z3;0VDJN;KOG2937;0A2PS	decapping mRNA 2 [Source:MGI Symbol;Acc:MGI:1917890]	70640	Q9CYC6;Q3U671
ENSMUSG00000073490	5844.88	4178.06	7511.7	1.79789	0.846306	4.13893e-06	0.000588337	1	173550993	173569313	-	3422	Ifi207	GO:0000122;GO:0000978;GO:0001227;GO:0002218;GO:0003690;GO:0003690;GO:0005634;GO:0005654;GO:0005730;GO:0005829;GO:0008134;GO:0035458;GO:0035458;GO:0042802;GO:0000122;GO:0000978;GO:0001227;GO:0002218;GO:0003690;GO:0003690;GO:0005634;GO:0005654;GO:0005730;GO:0005829;GO:0008134;GO:0035458;GO:0035458;GO:0042802;	K20914	-	K	1CTDT;0UM8D;0DINX;0J5NP;194Q0;1B2J8;1408X;0V89T;09XBF	interferon activated gene 207 [Source:MGI Symbol;Acc:MGI:2138302]	226691	E9Q3L4;Q8BW36
ENSMUSG00000024754	2163.66	1655.42	2671.9	1.61404	0.690675	4.32477e-06	0.000608784	19	21755706	21835724	+	8520	Cemip2	GO:0001525;GO:0004415;GO:0004415;GO:0004415;GO:0005509;GO:0005509;GO:0005509;GO:0005886;GO:0005886;GO:0005886;GO:0005887;GO:0005887;GO:0005887;GO:0007275;GO:0008152;GO:0016020;GO:0016021;GO:0016787;GO:0016798;GO:0030214;GO:0030214;GO:0030214;GO:0043231;GO:0043231;GO:1903670;GO:0001525;GO:0004415;GO:0004415;GO:0005509;GO:0005509;GO:0005886;GO:0005886;GO:0005887;GO:0005887;GO:0007275;GO:0008152;GO:…	K22144	EC:3.2.1.35	S	0V9F4;1AU2R;0UQAV;1CUR8;12SC1;09YCH;0DJXS;19009;0IFCM	cell migration inducing hyaluronidase 2 [Source:MGI Symbol;Acc:MGI:1890373]	83921	Q5FWI3;Q8BS93
ENSMUSG00000030921	11349.5	7423.5	15275.4	2.05771	1.04104	4.51181e-06	0.000625813	7	104058232	104114400	-	4111	Trim30a	GO:0000209;GO:0003677;GO:0005634;GO:0005654;GO:0005737;GO:0005737;GO:0005737;GO:0005829;GO:0008270;GO:0009617;GO:0010468;GO:0010508;GO:0016567;GO:0019901;GO:0032715;GO:0032720;GO:0032880;GO:0034122;GO:0042803;GO:0043123;GO:0045087;GO:0045732;GO:0046596;GO:0046598;GO:0046872;GO:0051092;GO:0051865;GO:0061630;GO:1900226;GO:2000378;	-	-	O;K	0B6AK;0WJ0G;13FYK;1DGAS;1BBGY;197FW;0E9FG;0ITFH;0V3TY	tripartite motif-containing 30A [Source:MGI Symbol;Acc:MGI:98178]	20128	P15533
ENSMUSG00000032661	4951.39	2860.04	7042.75	2.46247	1.3001	4.53206e-06	0.000625813	5	120891163	120915726	-	7069	Oas3	GO:0000166;GO:0001730;GO:0001730;GO:0001730;GO:0001730;GO:0002376;GO:0003723;GO:0003725;GO:0003725;GO:0003725;GO:0005524;GO:0005524;GO:0005634;GO:0005654;GO:0005654;GO:0005737;GO:0005737;GO:0005829;GO:0005829;GO:0005886;GO:0009615;GO:0009615;GO:0016020;GO:0016740;GO:0016779;GO:0016779;GO:0045071;GO:0045071;GO:0045087;GO:0046872;GO:0051607;GO:0051607;GO:0051607;GO:0051607;GO:0060700;GO:0060700;GO:…	K14216	EC:2.7.7.84	H;J;O	0DF4M;0V4TK;1CP6T;KOG0001;0UKKA;1B0YU;09TUC;12QYV;18ZNQ	2'-5' oligoadenylate synthetase 3 [Source:MGI Symbol;Acc:MGI:2180850]	246727	Q8VI93
ENSMUSG00000038127	6552.89	5099.1	8006.67	1.57021	0.650959	4.59214e-06	0.000626699	16	27207619	27270968	+	9164	Ccdc50	GO:0005829;GO:0007605;GO:0031625;GO:0005737;GO:0005737;GO:0007605;GO:0015630;GO:0005737;GO:0007605;GO:0015630;GO:0005737;GO:0005737;GO:0007605;GO:0015630;	-	-	S	1CY0F;0A1F0;1ASJI;0VCAI;0IKBK;13ITI;0DP2H;0UQIG;18VH7	coiled-coil domain containing 50 [Source:MGI Symbol;Acc:MGI:1914751]	67501	Q810U5;A6H6M8
ENSMUSG00000045932	25041.4	11300.9	38781.9	3.43176	1.77895	4.62493e-06	0.000626699	19	34528094	34553819	+	3927	Ifit2	GO:0035457;GO:0005737;GO:0005783;GO:0009615;GO:0032091;GO:0035457;GO:0043065;	-	-	T;P	195AX;0UPM4;1CVFR;12U68;0DKMA;KOG1124;09Z5A;1B0A0;0VA2H	interferon-induced protein with tetratricopeptide repeats 2 [Source:MGI Symbol;Acc:MGI:99449]	15958	Q64112;Q6GTM0
ENSMUSG00000031779	281.179	187.751	374.607	1.99523	0.996556	4.70533e-06	0.000629472	8	95472218	95478327	+	2325	Ccl22	GO:0002548;GO:0005125;GO:0005576;GO:0005576;GO:0005615;GO:0005615;GO:0005615;GO:0005615;GO:0006935;GO:0006954;GO:0006954;GO:0006954;GO:0006955;GO:0007165;GO:0007186;GO:0008009;GO:0008009;GO:0030593;GO:0031640;GO:0043547;GO:0048020;GO:0048247;GO:0060326;GO:0061844;GO:0070098;GO:0070374;GO:0071346;GO:0071347;GO:0071356;	K21095	-	O;W	13VFZ;0DVRV;1D52B;0A9NQ;0UWA2;0VKK6;0J20K;1B6T1;193QM	chemokine (C-C motif) ligand 22 [Source:MGI Symbol;Acc:MGI:1306779]	20299	O88430;Q546S6
ENSMUSG00000038065	749.445	1000.5	498.387	0.498137	-1.00539	4.76523e-06	0.000629472	6	54658609	54680836	+	5695	Mturn	GO:0003674;GO:0005575;GO:0005737;GO:0007275;GO:0032088;GO:0045654;GO:0046330;GO:0048666;GO:0070374;GO:0005737;GO:0005737;GO:0032088;GO:0045654;GO:0046330;GO:0070374;	-	-	-	-	maturin, neural progenitor differentiation regulator homolog (Xenopus) [Source:MGI Symbol;Acc:MGI:1915485]	68235	Q8CGA4
ENSMUSG00000040152	1589.91	1151	2028.82	1.76266	0.817757	4.77563e-06	0.000629472	2	117942357	117957614	+	6073	Thbs1	GO:0000187;GO:0001786;GO:0001937;GO:0001953;GO:0001968;GO:0002040;GO:0002544;GO:0002581;GO:0002605;GO:0005178;GO:0005509;GO:0005509;GO:0005576;GO:0005577;GO:0005615;GO:0005615;GO:0005615;GO:0005737;GO:0006954;GO:0006954;GO:0006955;GO:0007050;GO:0007155;GO:0007155;GO:0008201;GO:0008201;GO:0008201;GO:0008284;GO:0009612;GO:0009749;GO:0009897;GO:0009986;GO:0010595;GO:0010596;GO:0010748;GO:0010751;GO:…	K16857	-	W	12R26;0IFQQ;0V6VV;18ZBB;0A0RB;0UH57;0DNNJ;1ASTS;1CY61	thrombospondin 1 [Source:MGI Symbol;Acc:MGI:98737]	21825	Q80YQ1;Q3TR40
ENSMUSG00000042333	1642.79	1249.59	2035.98	1.62932	0.704271	4.83215e-06	0.000631184	4	155006390	155013020	-	1438	Tnfrsf14	GO:0016020;GO:0016021;GO:0001618;GO:0002250;GO:0002376;GO:0002720;GO:0002720;GO:0005515;GO:0005886;GO:0005886;GO:0005886;GO:0009897;GO:0009897;GO:0016020;GO:0016021;GO:0016032;GO:0019955;GO:0031295;GO:0031625;GO:0045087;GO:0046642;GO:0046642;GO:0046718;GO:0050731;GO:0050731;GO:0050829;GO:0050829;GO:0050830;GO:0050830;GO:1905675;GO:2000406;GO:2000406;GO:0016020;GO:0016021;	K05152	-	-	-	tumor necrosis factor receptor superfamily, member 14 (herpesvirus entry mediator) [Source:MGI Symbol;Acc:MGI:2675303]	230979	Q80WM9
ENSMUSG00000042719	1880.81	1345.24	2416.39	1.79625	0.844986	4.88784e-06	0.000631621	5	121535999	121582441	+	8298	Naa25	GO:0004596;GO:0005737;GO:0005737;GO:0005737;GO:0005794;GO:0005794;GO:0005829;GO:0005829;GO:0017196;GO:0031416;	K17973	-	Z	0V5GR;0UH8P;09UHG;13A41;KOG2053;19000;1CQGP;1AZ67;0DFT8	N(alpha)-acetyltransferase 25, NatB auxiliary subunit [Source:MGI Symbol;Acc:MGI:2442563]	231713	Q8BWZ3;B2RQV1
ENSMUSG00000012519	1269.5	794.594	1744.4	2.19533	1.13444	4.92263e-06	0.000631621	8	112038429	112064809	-	2303	Mlkl	GO:0000166;GO:0004706;GO:0005515;GO:0005515;GO:0005515;GO:0005524;GO:0005524;GO:0005524;GO:0005524;GO:0005634;GO:0005737;GO:0005737;GO:0005737;GO:0005829;GO:0005886;GO:0005886;GO:0005886;GO:0006468;GO:0007166;GO:0007256;GO:0007257;GO:0012501;GO:0016020;GO:0019901;GO:0030054;GO:0042802;GO:0044877;GO:0044877;GO:0051607;GO:0070207;GO:0070207;GO:0070207;GO:0070266;GO:0070266;GO:0070266;GO:0097527;GO:…	K08849	EC:2.7.11.1	T	09UGW;12NRJ;1CQG8;0UH87;KOG0192;0DFSR;0V5G7;1B3AV;190B6	mixed lineage kinase domain-like [Source:MGI Symbol;Acc:MGI:1921818]	74568	Q9D2Y4
ENSMUSG00000057469	324.245	427.414	221.076	0.517242	-0.95109	5.08937e-06	0.000647287	12	16860964	16889743	+	5663	E2f6	GO:0000083;GO:0000122;GO:0000122;GO:0000785;GO:0000977;GO:0000977;GO:0000978;GO:0000981;GO:0001227;GO:0001227;GO:0003677;GO:0003677;GO:0003700;GO:0003700;GO:0005634;GO:0005634;GO:0005634;GO:0005654;GO:0005654;GO:0005662;GO:0005667;GO:0006355;GO:0006357;GO:0007049;GO:0046983;GO:0071339;GO:0071339;GO:0071339;GO:0090575;GO:0090575;GO:0090575;	K09390	-	K	1AZR3;12RRY;0DKP7;09Z75;1CVHQ;18WBV;0VA4H;KOG2577;0UKE1	E2F transcription factor 6 [Source:MGI Symbol;Acc:MGI:1354159]	50496	O54917;Q8VHT4
ENSMUSG00000025915	2908.11	2149.55	3666.67	1.70578	0.770434	5.21455e-06	0.000653845	1	9868332	9971070	+	14311	Sgk3	GO:0000166;GO:0004672;GO:0004674;GO:0004674;GO:0004674;GO:0004674;GO:0005524;GO:0005524;GO:0005654;GO:0005768;GO:0005769;GO:0006468;GO:0015459;GO:0016301;GO:0016310;GO:0016740;GO:0018105;GO:0031410;GO:0031410;GO:0035091;GO:0035556;GO:0043231;GO:0055037;GO:0106310;GO:0106311;GO:2001240;GO:0000166;GO:0004672;GO:0004674;GO:0004674;GO:0005524;GO:0005524;GO:0006468;GO:0035091;GO:0000166;GO:0004672;GO:…	K13304	EC:2.7.11.1	Z;T;D;U	1CV05;09U4Q;18Z3N;KOG2101;0V53T;0DFEB;KOG0598;12P0N;0UMQC;1AYN4	serum/glucocorticoid regulated kinase 3 [Source:MGI Symbol;Acc:MGI:2182368]	170755	Q9ERE3
ENSMUSG00000074896	6887.5	3278.13	10496.9	3.20209	1.67901	5.23112e-06	0.000653845	19	34560931	34566131	+	1745	Ifit3	GO:0002376;GO:0003723;GO:0005515;GO:0005737;GO:0005737;GO:0005739;GO:0005739;GO:0005829;GO:0005829;GO:0008285;GO:0009615;GO:0009617;GO:0035457;GO:0035458;GO:0035634;GO:0042802;GO:0043066;GO:0045087;GO:0051607;GO:0051607;	-	-	T;P	1AVY2;0UPM4;18T62;1CVFR;12U68;0DKMA;KOG1124;09Z5A;0VA2H	interferon-induced protein with tetratricopeptide repeats 3 [Source:MGI Symbol;Acc:MGI:1101055]	15959	Q64345;Q5FW82
ENSMUSG00000002602	4570.05	3205.54	5934.56	1.85135	0.888575	5.48205e-06	0.000678516	7	25456698	25488130	-	5033	Axl	GO:0000166;GO:0001618;GO:0001764;GO:0001779;GO:0001779;GO:0001786;GO:0001786;GO:0001818;GO:0001961;GO:0001961;GO:0001974;GO:0002376;GO:0004672;GO:0004713;GO:0004713;GO:0004713;GO:0004714;GO:0004714;GO:0005515;GO:0005524;GO:0005524;GO:0005615;GO:0005615;GO:0005886;GO:0005886;GO:0005886;GO:0005887;GO:0006468;GO:0006909;GO:0006909;GO:0006909;GO:0006954;GO:0007167;GO:0007169;GO:0007275;GO:0007283;GO:…	K05115	EC:2.7.10.1	T	1AWBG;13IZU;18X98;0DHUI;0V7HR;0IG6I;1CSU6;0UKVD;09WJ5	AXL receptor tyrosine kinase [Source:MGI Symbol;Acc:MGI:1347244]	26362	Q00993;Q8CCF8
ENSMUSG00000042726	7464.35	5558.46	9370.24	1.68576	0.7534	5.5221e-06	0.000678516	5	121509788	121523695	-	4486	Trafd1	GO:0005515;GO:0005515;GO:0008270;GO:0045824;GO:0046872;GO:0005515;GO:0005515;GO:0008270;GO:0045824;GO:0046872;GO:0008270;GO:0046872;	-	-	S;T	0DHHZ;12S7U;18XZG;0V6K8;0UJQC;0IGBJ;1AV75;1CS87;09XFH	TRAF type zinc finger domain containing 1 [Source:MGI Symbol;Acc:MGI:1923551]	231712	Q3UDK1
ENSMUSG00000034459	17476.7	10623.5	24329.9	2.2902	1.19547	5.58788e-06	0.000680829	19	34618271	34627409	+	2656	Ifit1	GO:0002376;GO:0003723;GO:0003723;GO:0005515;GO:0005737;GO:0005829;GO:0009615;GO:0009617;GO:0035457;GO:0035458;GO:0045087;GO:0051607;GO:0051607;	K14217	-	S;P	0DNWM;0A0WM;1CXU0;13I8N;1B0KV;0V5W7;KOG1124;1949C;0UM6F	interferon-induced protein with tetratricopeptide repeats 1 [Source:MGI Symbol;Acc:MGI:99450]	15957	Q64282
ENSMUSG00000023307	2908.23	1878.4	3938.06	2.0965	1.06798	5.90815e-06	0.000712074	19	37184942	37199550	+	2408	Marchf5	GO:0000209;GO:0000209;GO:0005739;GO:0005739;GO:0005739;GO:0005741;GO:0005741;GO:0005741;GO:0005783;GO:0005783;GO:0005783;GO:0005789;GO:0005789;GO:0005789;GO:0008270;GO:0016020;GO:0016021;GO:0016567;GO:0016740;GO:0046872;GO:0051020;GO:0051020;GO:0051865;GO:0051865;GO:0051865;GO:0061630;GO:0061630;GO:0061630;GO:0070585;GO:0070585;GO:0090140;GO:0090140;GO:0090140;GO:0090141;GO:0090141;GO:0090344;GO:…	K10660	EC:2.3.2.27	O;T	0UT7V;18RZT;KOG3053;13HQW;0VD5Z;1CYXY;1AZD6;09WVD;0DPY5	membrane associated ring-CH-type finger 5 [Source:MGI Symbol;Acc:MGI:1915207]	69104	Q3KNM2;A2RTC8
ENSMUSG00000026880	6885.77	5377.63	8393.9	1.56089	0.64237	5.94255e-06	0.000712074	2	35203998	35226988	-	2827	Stom	GO:0005515;GO:0005515;GO:0005737;GO:0005737;GO:0005739;GO:0005739;GO:0005739;GO:0005783;GO:0005783;GO:0005856;GO:0005856;GO:0005856;GO:0005886;GO:0005886;GO:0005886;GO:0005886;GO:0005886;GO:0005887;GO:0005887;GO:0005887;GO:0005887;GO:0016020;GO:0016020;GO:0031410;GO:0034765;GO:0042470;GO:0042802;GO:0042802;GO:0042802;GO:0042802;GO:0042803;GO:0044829;GO:0045121;GO:0045121;GO:0045121;GO:0048471;GO:…	K17286	-	C	0UJS6;KOG2621;18VUX;0V7RZ;12Q4D;1CSUA;0DI3X;09VMR;1B0DN	stomatin [Source:MGI Symbol;Acc:MGI:95403]	13830	P54116
ENSMUSG00000026466	6617.6	4649.45	8585.74	1.84661	0.884881	6.19991e-06	0.000736823	1	155880345	155912226	-	5406	Tor1aip1	GO:0005634;GO:0016020;GO:0016021;GO:0001671;GO:0001671;GO:0005515;GO:0005521;GO:0005521;GO:0005634;GO:0005634;GO:0005635;GO:0005635;GO:0005637;GO:0008092;GO:0016020;GO:0016021;GO:0031965;GO:0031965;GO:0032781;GO:0032781;GO:0051117;GO:0071763;GO:0090435;GO:0001671;GO:0001671;GO:0005515;GO:0005521;GO:0005634;GO:0005634;GO:0005635;GO:0005637;GO:0008092;GO:0016020;GO:0016021;GO:0031965;GO:0032781;GO:…	K23001	-	Z;U	0IJUB;0V845;0URZD;1CT7B;195K3;13NQE;1AS7N;0A10Q;0DNN8	torsin A interacting protein 1 [Source:MGI Symbol;Acc:MGI:3582693]	208263	Q921T2
ENSMUSG00000021676	749.893	551.723	948.063	1.71837	0.781039	6.29291e-06	0.000741041	13	95763682	96028991	-	6910	Iqgap2	GO:0005096;GO:0005516;GO:0005516;GO:0005516;GO:0005516;GO:0005547;GO:0005547;GO:0005547;GO:0005737;GO:0005737;GO:0005737;GO:0005874;GO:0005902;GO:0007165;GO:0009986;GO:0009986;GO:0030027;GO:0030027;GO:0030175;GO:0030175;GO:0031267;GO:0031267;GO:0031267;GO:0032956;GO:0034314;GO:0034314;GO:0043087;GO:0043547;GO:0051015;GO:0051015;GO:0051015;GO:0070493;GO:0070493;GO:0071933;GO:0071933;GO:2000249;GO:…	K05767	-	Z;T	12NUK;18UIB;1CQKC;0V5KR;1AYK0;0UHFT;0DFWY;KOG2128;09UM7	IQ motif containing GTPase activating protein 2 [Source:MGI Symbol;Acc:MGI:2449975]	544963	Q3UQ44
ENSMUSG00000027639	11492.4	6278.13	16706.7	2.66109	1.41202	6.33762e-06	0.000741041	2	156939453	156977185	-	9150	Samhd1	GO:0000166;GO:0000724;GO:0000724;GO:0000724;GO:0002376;GO:0003676;GO:0003676;GO:0003676;GO:0003697;GO:0003697;GO:0003697;GO:0003723;GO:0003723;GO:0003723;GO:0003824;GO:0004540;GO:0005525;GO:0005634;GO:0005634;GO:0005634;GO:0005634;GO:0005654;GO:0005654;GO:0005694;GO:0005886;GO:0005886;GO:0006203;GO:0006203;GO:0006203;GO:0006203;GO:0006260;GO:0006281;GO:0006974;GO:0006974;GO:0006974;GO:0008152;GO:…	K22544	EC:3.1.5.-	A;S;L	1CS5P;12RXY;0DHFI;1AV3J;09W6A;18TBT;0V74K;0UJIH;KOG2681	SAM domain and HD domain, 1 [Source:MGI Symbol;Acc:MGI:1927468]	56045	Q60710
ENSMUSG00000030199	1367.11	1038.46	1695.77	1.63296	0.707494	6.57316e-06	0.000762434	6	134012663	134247121	+	5983	Etv6	GO:0000122;GO:0000122;GO:0000977;GO:0000977;GO:0000978;GO:0000981;GO:0001227;GO:0001227;GO:0001228;GO:0003677;GO:0003677;GO:0003700;GO:0003700;GO:0005515;GO:0005634;GO:0005634;GO:0005730;GO:0005730;GO:0005829;GO:0005829;GO:0006355;GO:0006355;GO:0006357;GO:0007296;GO:0019904;GO:0019904;GO:0022008;GO:0030154;GO:0030154;GO:0043565;GO:0045944;GO:0071425;GO:0071425;GO:0071425;GO:0097152;GO:0003677;GO:…	K03211	-	K	18W20;0UKWA;0V9VI;KOG3804;1CV6T;13PIG;09YXU;0DKCW;1AWCK	ets variant 6 [Source:MGI Symbol;Acc:MGI:109336]	14011	P97360
ENSMUSG00000020641	40536.9	18137.2	62936.6	3.47002	1.79494	6.65785e-06	0.000763676	12	26492745	26506451	-	4335	Rsad2	GO:0001503;GO:0001650;GO:0002376;GO:0003674;GO:0003824;GO:0005515;GO:0005739;GO:0005739;GO:0005741;GO:0005743;GO:0005783;GO:0005783;GO:0005783;GO:0005783;GO:0005789;GO:0005789;GO:0005811;GO:0009615;GO:0009615;GO:0016020;GO:0030278;GO:0034157;GO:0034165;GO:0035710;GO:0043367;GO:0043621;GO:0043621;GO:0045071;GO:0045071;GO:0045087;GO:0046872;GO:0050709;GO:0050709;GO:0050778;GO:0051536;GO:0051536;GO:…	K15045	-	T	12T31;0V8TS;18XI7;0IGZE;09XW8;1CU0T;0DJ8V;0UKZM;1AT32	radical S-adenosyl methionine domain containing 2 [Source:MGI Symbol;Acc:MGI:1929628]	58185	Q8CBB9
ENSMUSG00000037972	849.245	632.009	1066.48	1.68745	0.754842	6.68921e-06	0.000763676	16	10878809	10892849	+	2967	Snn	GO:0005737;GO:0005739;GO:0005741;GO:0005741;GO:0008150;GO:0016020;GO:0016021;GO:0016021;GO:0016021;GO:0016021;GO:0046872;GO:0005737;GO:0005737;GO:0005739;GO:0005741;GO:0005741;GO:0008150;GO:0016020;GO:0016021;GO:0016021;GO:0016021;GO:0016021;GO:0016021;GO:0046872;GO:0046872;	-	-	U	193M2;1B6DA;0VJ4A;13T7F;1D45Q;0A88N;0IYFC;0DUUU;0UVSP	stannin [Source:MGI Symbol;Acc:MGI:1276549]	20621	P61807;Q5M8P0
ENSMUSG00000001768	3432.01	1875.77	4988.25	2.65931	1.41105	7.0561e-06	0.000797885	2	145517135	145729536	+	11271	Rin2	GO:0003674;GO:0005096;GO:0005575;GO:0005737;GO:0006897;GO:0007165;GO:0010595;GO:0010595;GO:0043547;GO:1904906;GO:1904906;GO:2001214;GO:2001214;GO:0005096;GO:0007165;GO:0043547;	K23687	-	U	1ARTC;1CPKM;0V4JF;09TKE;0DEX2;13JV5;190KR;KOG2320;0UFZG	Ras and Rab interactor 2 [Source:MGI Symbol;Acc:MGI:1921280]	74030	Q9D684;F8WGD2
ENSMUSG00000019699	1039.99	726.536	1353.45	1.86288	0.897537	7.09892e-06	0.000797885	1	176847639	177085769	-	5124	Akt3	GO:0000002;GO:0000166;GO:0001938;GO:0004672;GO:0004672;GO:0004674;GO:0004674;GO:0004674;GO:0004674;GO:0005080;GO:0005515;GO:0005524;GO:0005524;GO:0005524;GO:0005634;GO:0005737;GO:0005886;GO:0006468;GO:0006468;GO:0007165;GO:0010765;GO:0016020;GO:0016301;GO:0016310;GO:0016740;GO:0018105;GO:0018105;GO:0018107;GO:0032008;GO:0032869;GO:0035556;GO:0035556;GO:0043536;GO:0045766;GO:0045793;GO:0048854;GO:…	K04456	EC:2.7.11.1	T	0UJ1F;09T9K;1AYSE;KOG0598;194TB;12P0N;0V5U6;1CUFJ;0DI33	thymoma viral proto-oncogene 3 [Source:MGI Symbol;Acc:MGI:1345147]	23797	Q9WUA6;Q8C6X4
ENSMUSG00000024338	697.781	513.829	881.733	1.71601	0.779054	7.23737e-06	0.000807189	17	34416695	34420428	+	3381	Psmb8	GO:0000502;GO:0000502;GO:0004298;GO:0004298;GO:0005634;GO:0005737;GO:0005839;GO:0006508;GO:0008233;GO:0016787;GO:0030154;GO:0051603;GO:0000502;GO:0000502;GO:0000502;GO:0000502;GO:0002376;GO:0004175;GO:0004298;GO:0004298;GO:0005515;GO:0005634;GO:0005634;GO:0005654;GO:0005737;GO:0005737;GO:0005829;GO:0005839;GO:0005839;GO:0005839;GO:0005839;GO:0006508;GO:0008233;GO:0010499;GO:0016787;GO:0019774;GO:…	K02740	EC:3.4.25.1	O	0V6J5;KOG0175;12PAC;0UH93;0DGUM;18SWK;1AS2J;09VK0;1CRIR	proteasome (prosome, macropain) subunit, beta type 8 (large multifunctional peptidase 7) [Source:MGI Symbol;Acc:MGI:1346527]	16913	P28063
ENSMUSG00000034957	1012	1433.94	590.06	0.411495	-1.28105	7.76899e-06	0.000859867	7	34818718	34821353	+	2636	Cebpa	GO:0000050;GO:0000122;GO:0000785;GO:0000976;GO:0000976;GO:0000978;GO:0000978;GO:0000978;GO:0000981;GO:0000981;GO:0001163;GO:0001228;GO:0001228;GO:0001228;GO:0001228;GO:0001889;GO:0001889;GO:0001892;GO:0003677;GO:0003677;GO:0003682;GO:0003700;GO:0003700;GO:0003700;GO:0003700;GO:0005515;GO:0005515;GO:0005515;GO:0005634;GO:0005634;GO:0005634;GO:0005654;GO:0005654;GO:0005654;GO:0005667;GO:0005667;GO:…	K09055	-	K	0UQS9;193T6;13MUP;1B0J0;0DM32;KOG3119;09ZJS;1CVPC;0VAGH	CCAAT/enhancer binding protein (C/EBP), alpha [Source:MGI Symbol;Acc:MGI:99480]	12606	P53566
ENSMUSG00000039982	1950.83	2399.03	1502.63	0.626351	-0.674957	8.38526e-06	0.000908855	19	12443702	12478818	-	5226	Dtx4	GO:0005654;GO:0005737;GO:0007219;GO:0007219;GO:0007219;GO:0008270;GO:0016567;GO:0016567;GO:0016567;GO:0016740;GO:0046872;GO:0046872;GO:0061630;	K06058	EC:2.3.2.27	O	1CPJ6;0V4HT;139G2;1B3TT;0IEMS;18VA0;0UNT1;09TIV;0DEVG	deltex 4, E3 ubiquitin ligase [Source:MGI Symbol;Acc:MGI:2672905]	207521	Q6PDK8
ENSMUSG00000038866	3210.19	2498.84	3921.54	1.56934	0.650161	8.44942e-06	0.000908855	1	105918136	105961804	+	6774	Zcchc2	GO:0003674;GO:0003676;GO:0005737;GO:0005737;GO:0008150;GO:0008270;GO:0035091;GO:0046872;GO:0003674;GO:0003676;GO:0005737;GO:0008150;GO:0008270;GO:0035091;GO:0046872;GO:0003676;GO:0008270;GO:0035091;	K22700	-	S;J;O;T	0A0WN;1CXF6;0IZZC;192BR;0URV6;0VBT4;12U3N;0DNHU;1AZ1X	zinc finger, CCHC domain containing 2 [Source:MGI Symbol;Acc:MGI:2444114]	227449	Q69ZB8
ENSMUSG00000017830	2514.36	1592.11	3436.61	2.15852	1.11005	8.45457e-06	0.000908855	11	100585710	100595097	-	3272	Dhx58	GO:0000166;GO:0002376;GO:0003677;GO:0003723;GO:0003724;GO:0003725;GO:0003725;GO:0003725;GO:0003725;GO:0003727;GO:0003727;GO:0003727;GO:0003727;GO:0004386;GO:0005524;GO:0005524;GO:0005737;GO:0005737;GO:0005737;GO:0008270;GO:0008270;GO:0008270;GO:0008270;GO:0009615;GO:0009615;GO:0009617;GO:0016787;GO:0016787;GO:0032480;GO:0032480;GO:0032480;GO:0032481;GO:0032728;GO:0039534;GO:0039534;GO:0039534;GO:…	K12649	EC:3.6.4.13	A	0V4TZ;18WX5;KOG0354;1CTWW;0DF53;1AT0C;12NQ7;09TUS;0UGAY	DEXH (Asp-Glu-X-His) box polypeptide 58 [Source:MGI Symbol;Acc:MGI:1931560]	80861	Q99J87
ENSMUSG00000037921	2139.96	1260.56	3019.35	2.39524	1.26017	8.46234e-06	0.000908855	8	62381121	62491278	+	8684	Ddx60	GO:0003690;GO:0003723;GO:0003725;GO:0003727;GO:0005515;GO:0005737;GO:0005829;GO:0009615;GO:0045111;GO:0051607;GO:1900245;GO:1900246;GO:0003690;GO:0003723;GO:0003725;GO:0003727;GO:0005515;GO:0005737;GO:0005829;GO:0009615;GO:0045111;GO:0051607;GO:1900245;GO:1900246;GO:0000166;GO:0003676;GO:0003690;GO:0003723;GO:0003725;GO:0003727;GO:0005515;GO:0005524;GO:0005524;GO:0005737;GO:0005829;GO:0009615;GO:…	K20103	EC:3.6.4.13	A	KOG0949;KOG0948;0UMKZ;1AX3N;0A0C4;12SQZ;0DIYN;0V75Y;18XMV;1CTQ4	DExD/H box helicase 60 [Source:MGI Symbol;Acc:MGI:2384570]	234311	G3X9F7
ENSMUSG00000034422	43621.6	34482.9	52760.2	1.53004	0.613569	8.69626e-06	0.000921391	16	35653244	35691914	-	9306	Parp14	GO:0002376;GO:0003714;GO:0003950;GO:0003950;GO:0003950;GO:0003950;GO:0005515;GO:0005515;GO:0005634;GO:0005634;GO:0005737;GO:0005737;GO:0005737;GO:0005737;GO:0005829;GO:0005829;GO:0005886;GO:0005886;GO:0006471;GO:0006471;GO:0010629;GO:0010629;GO:0010629;GO:0016740;GO:0016757;GO:0019899;GO:0019899;GO:0042531;GO:0042531;GO:0042532;GO:0042532;GO:0045087;GO:0045892;GO:0060336;GO:0060336;GO:0060336;GO:…	K15261	EC:2.4.2.30	K;B	1AWYB;KOG2633;09Z6H;0UPNT;19113;12QR3;0VA3U;1CPQR;0DKND	poly (ADP-ribose) polymerase family, member 14 [Source:MGI Symbol;Acc:MGI:1919489]	547253	Q2EMV9
ENSMUSG00000037965	5038.81	3823.35	6254.26	1.63581	0.710002	8.70615e-06	0.000921391	16	10954456	10994257	-	9160	Zc3h7a	GO:0005575;GO:0010608;GO:0010608;GO:0035196;GO:0035196;GO:0035196;GO:0035198;GO:0035198;GO:0035198;GO:0035198;GO:0046872;GO:0046872;GO:0005575;GO:0010608;GO:0035196;GO:0035196;GO:0035198;GO:0035198;GO:0035198;GO:0046872;GO:0046872;GO:0005575;GO:0010608;GO:0035196;GO:0035196;GO:0035198;GO:0035198;GO:0035198;GO:0005575;GO:0010608;GO:0035196;GO:0035196;GO:0035198;GO:0035198;GO:0035198;GO:0046872;GO:…	-	-	S	0V65D;13JTB;0DGET;0IDY2;1AYKT;18W97;0UI71;1CR4B;09V5T	zinc finger CCCH type containing 7 A [Source:MGI Symbol;Acc:MGI:2445044]	106205	Q3UBH9
ENSMUSG00000041515	1792.64	1013.88	2571.4	2.5362	1.34267	8.97892e-06	0.000943372	8	121463097	121483433	+	7055	Irf8	GO:0000976;GO:0003700;GO:0006355;GO:0000122;GO:0000122;GO:0000122;GO:0000976;GO:0000977;GO:0000978;GO:0000978;GO:0000978;GO:0000981;GO:0001227;GO:0001227;GO:0002273;GO:0002376;GO:0003677;GO:0003677;GO:0003700;GO:0003700;GO:0005515;GO:0005515;GO:0005634;GO:0005634;GO:0005634;GO:0005634;GO:0005654;GO:0005654;GO:0005737;GO:0005737;GO:0005737;GO:0006355;GO:0006355;GO:0006357;GO:0006909;GO:0006914;GO:…	K10155	-	K	0IED8;1CQWX;0UH9B;09UXV;12P0C;0V5XS;0DG7D;18WNW;1B0TA	interferon regulatory factor 8 [Source:MGI Symbol;Acc:MGI:96395]	15900	P23611;Q544J7
ENSMUSG00000020707	471.538	338.442	604.635	1.78652	0.837153	9.26222e-06	0.000965371	11	80074677	80090583	+	2140	Rnf135	GO:0000209;GO:0000209;GO:0002376;GO:0004842;GO:0004842;GO:0004842;GO:0005515;GO:0005737;GO:0005737;GO:0005737;GO:0010494;GO:0010494;GO:0010994;GO:0010994;GO:0016567;GO:0016567;GO:0016740;GO:0032728;GO:0032728;GO:0039529;GO:0039529;GO:0039552;GO:0039552;GO:0042802;GO:0043021;GO:0043021;GO:0043021;GO:0045087;GO:0045088;GO:0045088;GO:0045088;GO:0046872;GO:0051260;GO:0051260;GO:0061630;GO:0061630;GO:…	K16272	EC:2.3.2.27	O	KOG2177;0DPJK;192IU;0VD8I;0A2CS;13IHW;1B3VG;0US85;1CZ0N	ring finger protein 135 [Source:MGI Symbol;Acc:MGI:1919206]	71956	Q9CWS1;B2RRA5
ENSMUSG00000038848	1829.58	1409.34	2249.81	1.59635	0.674779	9.32147e-06	0.000965371	2	180546170	180562742	-	3316	Ythdf1	GO:0002376;GO:0002577;GO:0003723;GO:0003723;GO:0003729;GO:0005737;GO:0005737;GO:0007612;GO:0007613;GO:0043022;GO:0043022;GO:0045727;GO:0045727;GO:0045948;GO:0045948;GO:0045948;GO:0061157;GO:1900271;GO:1902667;GO:1990247;GO:1990247;GO:1990247;GO:0003723;GO:0003723;GO:0043022;GO:0045727;GO:0045948;GO:1990247;	K20102	-	S;O	0DI60;KOG1901;1CVRJ;12SRC;1B2IV;18TG9;0V7TV;0USF9;09WVV	YTH N6-methyladenosine RNA binding protein 1 [Source:MGI Symbol;Acc:MGI:1917431]	228994	P59326
ENSMUSG00000000708	700.929	518.57	883.288	1.70332	0.768347	9.39038e-06	0.000965611	17	53873889	53979748	+	4867	Kat2b	GO:0000123;GO:0000776;GO:0000785;GO:0000977;GO:0003682;GO:0003682;GO:0003712;GO:0003712;GO:0003713;GO:0003713;GO:0004145;GO:0004402;GO:0004402;GO:0004402;GO:0004402;GO:0004468;GO:0004468;GO:0004468;GO:0004861;GO:0005515;GO:0005515;GO:0005515;GO:0005634;GO:0005634;GO:0005634;GO:0005634;GO:0005654;GO:0005654;GO:0005654;GO:0005671;GO:0005671;GO:0005737;GO:0005813;GO:0005813;GO:0005813;GO:0005815;GO:…	K06062	EC:2.3.1.48	K;B	0DJU7;1CUMB;18WPU;KOG1472;1AY5I;09YE2;0V9BR;0UNP0;12NNQ	K(lysine) acetyltransferase 2B [Source:MGI Symbol;Acc:MGI:1343094]	18519	Q9JHD1;B2RR30
ENSMUSG00000062082	551.302	401.085	701.519	1.74905	0.806575	9.89904e-06	0.00101075	16	44632096	44659513	+	2045	Cd200r4	GO:0005515;GO:0009897;GO:0009897;GO:0016020;GO:0016021;GO:0038023;GO:0038023;GO:0038023;GO:0150077;GO:0016021;GO:0038023;GO:0150077;GO:0005515;GO:0009897;GO:0009897;GO:0016020;GO:0016021;GO:0038023;GO:0038023;GO:0038023;GO:0150077;	K21668	-	T	0IUJX;09UBR;13MZY;0VCDX;0DHSW;0USYY;1930G;1CWFP;1B5B2	CD200 receptor 4 [Source:MGI Symbol;Acc:MGI:3036289]	239849	Q6XJV4
ENSMUSG00000033355	4125.67	3232.1	5019.23	1.55293	0.634995	1.04124e-05	0.00105573	16	23339041	23432972	+	2131	Rtp4	GO:0001580;GO:0001580;GO:0005515;GO:0005737;GO:0005737;GO:0006612;GO:0006612;GO:0016020;GO:0016021;GO:0031849;GO:0051205;GO:0051607;GO:0001580;GO:0001580;GO:0005515;GO:0005737;GO:0005737;GO:0006612;GO:0006612;GO:0016020;GO:0016021;GO:0031849;GO:0051205;GO:0051607;GO:0001580;GO:0001580;GO:0005515;GO:0005737;GO:0005737;GO:0006612;GO:0006612;GO:0016020;GO:0016021;GO:0031849;GO:0051205;GO:0051607;	-	-	T;U	13PC0;1967W;1B03R;09WVI;0UUMV;0DTMI;0IH22;0VEXE;1D1CR	receptor transporter protein 4 [Source:MGI Symbol;Acc:MGI:1915025]	67775	Q9ER80
ENSMUSG00000026321	1307.93	999.487	1616.37	1.6172	0.693501	1.05789e-05	0.0010597	1	105708443	105775709	+	5987	Tnfrsf11a	GO:0001503;GO:0001503;GO:0002250;GO:0002250;GO:0004888;GO:0004888;GO:0005031;GO:0005031;GO:0005515;GO:0005829;GO:0005829;GO:0005886;GO:0005886;GO:0005886;GO:0007275;GO:0009314;GO:0009897;GO:0009897;GO:0009897;GO:0009986;GO:0016020;GO:0016021;GO:0019955;GO:0019955;GO:0019955;GO:0030316;GO:0030316;GO:0032496;GO:0033209;GO:0034097;GO:0034097;GO:0034612;GO:0043507;GO:0043507;GO:0045780;GO:0045780;GO:…	K05147	-	T	0IHUN;0UKJH;09WW1;0DI6B;0V7U4;1AVWA;1CSWQ;190DU;13NN7	tumor necrosis factor receptor superfamily, member 11a, NFKB activator [Source:MGI Symbol;Acc:MGI:1314891]	21934	O35305
ENSMUSG00000051065	169.382	105.295	233.469	2.21729	1.1488	1.05977e-05	0.0010597	16	28644928	28748425	-	3260	Mb21d2	GO:0044877;	-	-	T	0A1JV;0UNWM;0VCFH;12T2S;1CY5U;KOG3963;0DP7X;190QI;1B05Q	Mab-21 domain containing 2 [Source:MGI Symbol;Acc:MGI:1917028]	239796	D3Z742
ENSMUSG00000057367	733.928	545.507	922.35	1.69081	0.757717	1.09513e-05	0.00108756	9	7818228	7837065	-	4580	Birc2	GO:0000209;GO:0000209;GO:0000209;GO:0001666;GO:0001666;GO:0001741;GO:0001741;GO:0001890;GO:0003713;GO:0003713;GO:0003713;GO:0004842;GO:0004842;GO:0004842;GO:0005515;GO:0005634;GO:0005634;GO:0005634;GO:0005634;GO:0005634;GO:0005737;GO:0005737;GO:0005737;GO:0005737;GO:0006915;GO:0008270;GO:0008270;GO:0008270;GO:0009898;GO:0010243;GO:0014070;GO:0016740;GO:0016740;GO:0031398;GO:0032991;GO:0032991;GO:…	K16060	-	O;D;K	09XU3;13HTW;KOG1101;1920C;1B1TK;0DJ69;0UH8Q;0V8RR;1CTY4	baculoviral IAP repeat-containing 2 [Source:MGI Symbol;Acc:MGI:1197009]	11797	Q62210
ENSMUSG00000042901	2780.12	1813.68	3746.56	2.06572	1.04665	1.128e-05	0.00110091	1	183078134	183106331	+	6175	Aida	GO:0005515;GO:0005737;GO:0007275;GO:0009953;GO:0009953;GO:0016020;GO:0019904;GO:0031333;GO:0035091;GO:0043254;GO:0043508;GO:0043508;GO:0046329;GO:0046329;GO:0048264;GO:0048264;GO:2000016;GO:0005515;GO:0005737;GO:0007275;GO:0009953;GO:0009953;GO:0016020;GO:0019904;GO:0031333;GO:0035091;GO:0043254;GO:0043508;GO:0046329;GO:0046329;GO:0048264;GO:0048264;GO:2000016;	-	-	T	0IJ07;0VCEJ;13E2U;1B4ZR;0USJD;19547;0A1IY;1CY51;0DP70	axin interactor, dorsalization associated [Source:MGI Symbol;Acc:MGI:1919737]	108909	Q8C4Q6
ENSMUSG00000000275	6786.58	4867.59	8705.56	1.78848	0.838731	1.12879e-05	0.00110091	11	88890202	88911119	+	5754	Trim25	GO:0046872;GO:0002376;GO:0003713;GO:0005515;GO:0005634;GO:0005654;GO:0005654;GO:0005737;GO:0005737;GO:0005829;GO:0005829;GO:0006511;GO:0006511;GO:0006513;GO:0006513;GO:0010494;GO:0010494;GO:0010494;GO:0016567;GO:0016604;GO:0016604;GO:0016740;GO:0016874;GO:0030433;GO:0030433;GO:0032880;GO:0033280;GO:0039552;GO:0039552;GO:0043123;GO:0043123;GO:0043627;GO:0043627;GO:0043627;GO:0045087;GO:0045087;GO:…	K10652	EC:2.3.2.27	O	13FYX;0WJ0S;1BBH2;1DGB0;0B6AX;0E9FQ;0ITFP;0V3U3	tripartite motif-containing 25 [Source:MGI Symbol;Acc:MGI:102749]	217069	Q61510
ENSMUSG00000064267	1920.85	2357.58	1484.12	0.629507	-0.667705	1.13144e-05	0.00110091	5	122344867	122380360	+	3563	Hvcn1	GO:0005216;GO:0005244;GO:0005886;GO:0005887;GO:0005887;GO:0005887;GO:0006811;GO:0006811;GO:0009268;GO:0010043;GO:0010043;GO:0016020;GO:0016020;GO:0016021;GO:0016021;GO:0016021;GO:0016324;GO:0022843;GO:0030171;GO:0030171;GO:0030171;GO:0032930;GO:0034765;GO:0042802;GO:0042802;GO:0051453;GO:0055085;GO:0071294;GO:0071294;GO:0071467;GO:0071467;GO:1902600;GO:1902600;GO:1902600;GO:0005886;GO:0005887;GO:…	K22644	-	P	1CZAU;18UI3;0IKBG;0UKG8;0DPF4;1ATJ2;0A4BD;12RFQ;0VF65	hydrogen voltage-gated channel 1 [Source:MGI Symbol;Acc:MGI:1921346]	74096	Q3U2S8
ENSMUSG00000026657	1082.58	660.4	1504.76	2.27855	1.18812	1.14091e-05	0.00110091	2	4022528	4618854	+	23468	Frmd4a	GO:0005737;GO:0005856;GO:0005737;GO:0005737;GO:0005737;GO:0005856;GO:0005856;GO:0005912;GO:0005912;GO:0005923;GO:0005923;GO:0005923;GO:0030054;GO:0030674;GO:0050709;GO:0050714;GO:0050714;GO:0090162;GO:0005856;GO:0005856;GO:0005737;GO:0005856;GO:0005856;GO:0005737;GO:0005737;GO:0005856;GO:0005856;GO:0005912;GO:0005912;GO:0005923;GO:0005923;GO:0005923;GO:0030054;GO:0030674;GO:0050709;GO:0050714;GO:…	K23970	-	Z;S	138F6;09Y1E;KOG3529;1B4PC;190FK;0UP61;1D0ZK;0VF1Q;0DPGB	FERM domain containing 4A [Source:MGI Symbol;Acc:MGI:1919850]	209630	Q8BIE6
ENSMUSG00000035517	2719.05	1953.27	3484.84	1.7841	0.835198	1.14655e-05	0.00110091	4	45965334	46034761	+	3958	Tdrd7	GO:0003723;GO:0005737;GO:0005759;GO:0047485;GO:0002089;GO:0002089;GO:0003723;GO:0003729;GO:0003729;GO:0005515;GO:0005737;GO:0005759;GO:0007275;GO:0007281;GO:0007283;GO:0010608;GO:0010608;GO:0030154;GO:0033391;GO:0035770;GO:0035770;GO:0043186;GO:0047485;GO:0070306;GO:0070306;GO:1990904;	K18405	-	K	0E84K;1975V;13CMP;0WGMT;0B45N;0V31Q;1DF3K;1BAXT;0IPR1	tudor domain containing 7 [Source:MGI Symbol;Acc:MGI:2140279]	100121	Q8K1H1
ENSMUSG00000054404	22745.7	15591.2	29900.2	1.91776	0.939421	1.19539e-05	0.00114026	11	82842175	82855666	+	6326	Slfn5	GO:0005634;GO:0000166;GO:0005524;GO:0005634;GO:0005634;GO:0030154;GO:0000166;GO:0005524;GO:0005634;GO:0005634;GO:0030154;	-	-	S;P	13MK6;195BZ;0DNJW;1CXGY;1AXTK;0IJEW;0VBV2;0A0YK;0UNAG	schlafen 5 [Source:MGI Symbol;Acc:MGI:1329004]	327978	Q8CBA2
ENSMUSG00000026648	537.908	392.227	683.589	1.74284	0.801441	1.21082e-05	0.00114743	2	3425168	3465167	+	9316	Dclre1c	GO:0000014;GO:0000723;GO:0002250;GO:0002376;GO:0003684;GO:0004518;GO:0004519;GO:0004527;GO:0005634;GO:0005634;GO:0005654;GO:0005794;GO:0006281;GO:0006302;GO:0006303;GO:0006310;GO:0006310;GO:0006974;GO:0008409;GO:0010212;GO:0016787;GO:0030183;GO:0031848;GO:0033151;GO:0035312;GO:0036297;GO:0051276;GO:0070419;GO:0070419;GO:0090305;GO:0005634;GO:0000014;GO:0000014;GO:0000723;GO:0002250;GO:0002376;GO:…	K10887	EC:3.1.-.-	L	0DMA4;KOG1361;190WW;09ZS0;1AT69;0UI98;12S8N;1CW59;0VANF	DNA cross-link repair 1C [Source:MGI Symbol;Acc:MGI:2441769]	227525	Q8K4J0
ENSMUSG00000046879	6871.29	4453.19	9289.39	2.08601	1.06074	1.29626e-05	0.00122042	11	48752795	48762510	-	5810	Irgm1	GO:0000045;GO:0000139;GO:0000166;GO:0000421;GO:0001891;GO:0002376;GO:0003924;GO:0005525;GO:0005525;GO:0005764;GO:0005765;GO:0005768;GO:0005770;GO:0005776;GO:0005783;GO:0005789;GO:0005794;GO:0005886;GO:0006914;GO:0006952;GO:0006952;GO:0009617;GO:0016020;GO:0016020;GO:0016787;GO:0030670;GO:0031410;GO:0031902;GO:0035458;GO:0042995;GO:0044754;GO:0045087;GO:0045335;GO:0060335;GO:0071346;GO:0075044;GO:…	K14139	EC:3.6.5.-	S	0VCS4;1B342;0USWG;0A1WK;0J94V;1CYHC;143RS;0DPIR;194HK	immunity-related GTPase family M member 1 [Source:MGI Symbol;Acc:MGI:107567]	15944	Q60766
ENSMUSG00000068246	53.0007	22.6633	83.338	3.67722	1.87861	1.30874e-05	0.00122422	15	77613239	77620582	+	1821	Apol9b	GO:0005575;GO:0005576;GO:0006869;GO:0008150;GO:0008289;GO:0008289;GO:0042157;GO:0005575;GO:0005576;GO:0006869;GO:0008150;GO:0008289;GO:0008289;GO:0042157;GO:0005575;GO:0005576;GO:0006869;GO:0008150;GO:0008289;GO:0008289;GO:0042157;GO:0005575;GO:0005576;GO:0006869;GO:0008150;GO:0008289;GO:0008289;GO:0042157;	K14480	-	-	-	apolipoprotein L 9b [Source:MGI Symbol;Acc:MGI:1919148]	71898	Q8C7I4
ENSMUSG00000061232	8282.96	5953.65	10612.3	1.78248	0.833884	1.33772e-05	0.00124331	17	34214991	34219321	-	2938	H2-K1	GO:0006955;GO:0016020;GO:0016021;GO:0019882;GO:0016020;GO:0016021;GO:0016020;GO:0016021;GO:0001916;GO:0002376;GO:0002474;GO:0002476;GO:0002485;GO:0005102;GO:0005515;GO:0005615;GO:0005783;GO:0005794;GO:0005797;GO:0005886;GO:0006955;GO:0009897;GO:0009897;GO:0009986;GO:0010977;GO:0016020;GO:0016021;GO:0019882;GO:0030670;GO:0030881;GO:0042277;GO:0042590;GO:0042605;GO:0042608;GO:0042610;GO:0042612;GO:…	K06751	-	U	09WNN;0US52;0VB3S;1CU56;0II5V;194CQ;13KER;0DJCZ;1AX68	histocompatibility 2, K1, K region [Source:MGI Symbol;Acc:MGI:95904]	14972	P01901;Q7JJ15
ENSMUSG00000032333	355.269	249.699	460.839	1.84558	0.884076	1.35073e-05	0.0012474	9	58160447	58169803	+	3093	Stoml1	GO:0005886;GO:0016020;GO:0016020;GO:0016021;GO:0005886;GO:0016020;GO:0016021;GO:0005886;	-	-	C;I	1CW8E;0DND7;KOG4170;13KV8;0A0RY;18S72;0VBNA;KOG2621;1ATKT;0UI1B	stomatin-like 1 [Source:MGI Symbol;Acc:MGI:1916356]	69106	Q8CI66;A0A0B4J1F1
ENSMUSG00000030409	148.356	90.7757	205.936	2.26862	1.18182	1.38231e-05	0.00126849	7	18817774	18827746	+	4330	Dmpk	GO:0000166;GO:0002028;GO:0004672;GO:0004674;GO:0004674;GO:0004674;GO:0004674;GO:0004674;GO:0005515;GO:0005524;GO:0005524;GO:0005524;GO:0005524;GO:0005634;GO:0005640;GO:0005737;GO:0005739;GO:0005741;GO:0005783;GO:0005789;GO:0005829;GO:0005886;GO:0006468;GO:0006468;GO:0006468;GO:0006468;GO:0006874;GO:0006874;GO:0006998;GO:0006998;GO:0006998;GO:0006998;GO:0008016;GO:0008016;GO:0008016;GO:0008016;GO:…	K08788	EC:2.7.11.1	T	0URRI;09XPW;1D02W;0IT50;1B4NI;18WI2;12S9B;0VC66;0DQYP	dystrophia myotonica-protein kinase [Source:MGI Symbol;Acc:MGI:94906]	13400	P54265
ENSMUSG00000026482	2341	1718	2964.01	1.72527	0.786819	1.41569e-05	0.00129095	1	152392511	152642102	-	6907	Rgl1	GO:0005085;GO:0005085;GO:0007165;GO:0007264;GO:0050790;GO:0005085;GO:0005085;GO:0007165;GO:0007264;GO:0050790;GO:0005085;GO:0005085;GO:0007165;GO:0007264;GO:0050790;GO:0005085;GO:0007264;GO:0050790;	K17635	-	T	19172;0USHX;1CTFJ;09XD2;0DIQG;0V8B2;1AXKW;KOG3629;12RJ9	ral guanine nucleotide dissociation stimulator,- like 1 [Source:MGI Symbol;Acc:MGI:107484]	19731	Q60695
ENSMUSG00000038507	6624.47	5134.98	8113.96	1.58013	0.660047	1.43487e-05	0.00130026	6	39063344	39095283	-	3995	Parp12	GO:0003950;GO:0005575;GO:0005634;GO:0016740;GO:0046872;GO:0046872;GO:0070213;GO:0070213;GO:0070213;GO:0140289;GO:0140289;GO:0140289;GO:1990404;GO:1990404;GO:1990404;	K15259	EC:2.4.2.30	S	1CRAF;09VC4;0V6BA;18SQ4;1AV62;0IEI4;12P7S;0DGKK;0UIER	poly (ADP-ribose) polymerase family, member 12 [Source:MGI Symbol;Acc:MGI:2143990]	243771	Q8BZ20
ENSMUSG00000024308	9072.7	7155.71	10989.7	1.53579	0.618983	1.44825e-05	0.00130424	17	34134873	34148266	+	3628	Tapbp	GO:0002397;GO:0016020;GO:0016020;GO:0016021;GO:0019885;GO:0042824;GO:0062061;GO:0065003;GO:0000139;GO:0002398;GO:0002479;GO:0005515;GO:0005783;GO:0005789;GO:0005789;GO:0005887;GO:0006952;GO:0010468;GO:0016020;GO:0016020;GO:0016021;GO:0019885;GO:0030670;GO:0042824;GO:0046978;GO:0046979;GO:0050823;GO:0061635;GO:0062061;GO:0065003;	K08058	-	U	0VEP4;0II43;1ASXK;1D0KM;0DQWW;0UU10;18W5I;09XFN;13IBE	TAP binding protein [Source:MGI Symbol;Acc:MGI:1201689]	21356	Q9R233;Q3U9A3;Q8C6N4;Q9D679
ENSMUSG00000022906	5984.47	4503.78	7465.16	1.65753	0.729036	1.46314e-05	0.00130951	16	35758840	35792975	+	4872	Parp9	GO:0000122;GO:0000122;GO:0002230;GO:0002230;GO:0002376;GO:0003714;GO:0003714;GO:0003714;GO:0003950;GO:0003950;GO:0003950;GO:0003950;GO:0004857;GO:0004857;GO:0005634;GO:0005634;GO:0005634;GO:0005634;GO:0005654;GO:0005654;GO:0005737;GO:0005737;GO:0005737;GO:0005737;GO:0005739;GO:0005739;GO:0005829;GO:0005829;GO:0005829;GO:0006281;GO:0006302;GO:0006302;GO:0006302;GO:0006471;GO:0006471;GO:0006974;GO:…	K15260	EC:2.4.2.30	K;L;B	0VB7Q;KOG2633;1CWU7;0DMYD;0UR6C;0A0BJ;1B1IR;13JCG;18S0H	poly (ADP-ribose) polymerase family, member 9 [Source:MGI Symbol;Acc:MGI:1933117]	80285	Q8CAS9
ENSMUSG00000026158	262.243	176.22	348.266	1.97631	0.982808	1.49238e-05	0.00132749	1	23405505	23436853	-	8109	Ogfrl1	GO:0004985;GO:0005575;GO:0008150;GO:0016020;GO:0038003;GO:0038023;GO:0004985;GO:0016020;GO:0038003;GO:0038023;	-	-	K	09WNP;18WYM;12R0H;0DJC0;0UN1N;1CU47;1AXHX;0V8WT;0IH5X	opioid growth factor receptor-like 1 [Source:MGI Symbol;Acc:MGI:1917405]	70155	Q8VE52
ENSMUSG00000060519	7823.32	5684.03	9962.61	1.75274	0.80961	1.50859e-05	0.00133372	1	156481187	156501926	-	3892	Tor3a	GO:0005524;GO:0000166;GO:0005515;GO:0005524;GO:0005524;GO:0005635;GO:0005737;GO:0005783;GO:0005783;GO:0005783;GO:0005788;GO:0005788;GO:0005788;GO:0005788;GO:0016887;GO:0016887;GO:0016887;GO:0016887;GO:0005524;GO:0000166;GO:0005515;GO:0005524;GO:0005524;GO:0005635;GO:0005737;GO:0005783;GO:0005783;GO:0005788;GO:0005788;GO:0005788;GO:0016887;GO:0016887;GO:0016887;GO:0000166;GO:0005515;GO:0005524;GO:…	K23000	-	O	KOG2170;0UP3E;190BV;1B23X;1CVRQ;0A13M;13N66;0DKWG;0VBZV	torsin family 3, member A [Source:MGI Symbol;Acc:MGI:1353652]	30935	Q9ER38
ENSMUSG00000027951	3926.44	3016.8	4836.07	1.60305	0.680815	1.54233e-05	0.00135127	3	89622329	89660753	+	8118	Adar	GO:0001649;GO:0002244;GO:0002376;GO:0002566;GO:0003677;GO:0003692;GO:0003723;GO:0003723;GO:0003725;GO:0003726;GO:0003726;GO:0003726;GO:0004000;GO:0005515;GO:0005515;GO:0005634;GO:0005634;GO:0005654;GO:0005730;GO:0005730;GO:0005730;GO:0005737;GO:0005737;GO:0005737;GO:0006382;GO:0006382;GO:0006382;GO:0006396;GO:0006396;GO:0006397;GO:0006606;GO:0006611;GO:0008251;GO:0009615;GO:0009615;GO:0016553;GO:…	K12968	EC:3.5.4.37	A;K	0UMSB;KOG2777;18TUX;0V71Q;1CPDQ;0DJ39;09XR6;1AUGA;12PNZ	adenosine deaminase, RNA-specific [Source:MGI Symbol;Acc:MGI:1889575]	56417	Q99MU3;Q3UH31
ENSMUSG00000041827	16513.6	10474.8	22552.5	2.15302	1.10636	1.54708e-05	0.00135127	5	115061299	115075974	+	2608	Oasl1	GO:0002376;GO:0003677;GO:0003677;GO:0003723;GO:0003725;GO:0003725;GO:0003725;GO:0005634;GO:0005654;GO:0005654;GO:0005730;GO:0005730;GO:0005737;GO:0005737;GO:0005829;GO:0005829;GO:0009615;GO:0009615;GO:0016020;GO:0016779;GO:0045071;GO:0045071;GO:0045087;GO:0051607;GO:0051607;GO:0051607;GO:0051607;GO:0060700;GO:0002376;GO:0003677;GO:0003677;GO:0003723;GO:0003725;GO:0003725;GO:0003725;GO:0005634;GO:…	K14608	-	J;O	0DF4M;0V4TK;1CP6T;1947B;KOG0001;1B0SC;09TUC;12QYV;0UGA6	2'-5' oligoadenylate synthetase-like 1 [Source:MGI Symbol;Acc:MGI:2180849]	231655	Q8VI94
ENSMUSG00000028270	7424.63	4896.93	9952.33	2.03236	1.02316	1.56791e-05	0.00136127	3	142326363	142343769	+	2516	Gbp2	GO:0000139;GO:0000166;GO:0003924;GO:0003924;GO:0003924;GO:0005525;GO:0005525;GO:0005525;GO:0005634;GO:0005654;GO:0005737;GO:0005737;GO:0005794;GO:0005794;GO:0005829;GO:0009617;GO:0015629;GO:0016020;GO:0016787;GO:0020005;GO:0031410;GO:0031410;GO:0034504;GO:0035458;GO:0042803;GO:0042832;GO:0042832;GO:0044406;GO:0048471;GO:0048471;GO:0050830;GO:0050830;GO:0071222;GO:0071346;GO:0071346;GO:0003924;GO:…	K20897	-	S;O;T;D;C;K	1AVYD;0UI2K;0V9BC;134KU;09XSJ;KOG2037;1CUKV;0DJTQ;194H1	guanylate binding protein 2 [Source:MGI Symbol;Acc:MGI:102772]	14469	Q9Z0E6
ENSMUSG00000032258	393.388	273.318	513.457	1.8786	0.909662	1.64414e-05	0.00141895	9	83272346	83323180	-	6306	Lca5	GO:0005929;GO:0032391;GO:0032391;GO:0036064;GO:0044877;	-	-	Z;S	13HT9;1CS2T;0IKE1;0UJ8G;0V71Y;0DHCK;18W1A;09W3G;1AUR8	Leber congenital amaurosis 5 (human) [Source:MGI Symbol;Acc:MGI:1923032]	75782	Q80ST9;G5E886
ENSMUSG00000018986	399.942	200.342	599.542	2.9926	1.5814	1.86934e-05	0.00160376	11	83082156	83105980	+	3411	Slfn3	GO:0008285;GO:0008285;	K24457	-	S	1D111;1423J;1963I;0A069;0VDXK;0JAUV;0DRSW;0UUIB;1B4R5	schlafen 3 [Source:MGI Symbol;Acc:MGI:1329005]	20557	Q9Z0I5
ENSMUSG00000020638	25684.4	11265.3	40103.5	3.55992	1.83185	1.95644e-05	0.00166862	12	26519203	26529836	+	4163	Cmpk2	GO:0000166;GO:0004127;GO:0004127;GO:0004127;GO:0004127;GO:0004550;GO:0004550;GO:0004550;GO:0004550;GO:0004798;GO:0004798;GO:0004798;GO:0005524;GO:0005654;GO:0005737;GO:0005739;GO:0005739;GO:0005739;GO:0005739;GO:0006165;GO:0006165;GO:0006165;GO:0006221;GO:0006227;GO:0006227;GO:0006227;GO:0006233;GO:0006233;GO:0006233;GO:0006235;GO:0009041;GO:0009041;GO:0009041;GO:0009142;GO:0009142;GO:0009142;GO:…	K13809	EC:2.7.4.14	F	18VIN;1AXFD;0V8UG;0UMYT;09XWZ;13JW8;KOG3327;0DJ9U;1CU1T	cytidine monophosphate (UMP-CMP) kinase 2, mitochondrial [Source:MGI Symbol;Acc:MGI:99830]	22169	Q3U5Q7
ENSMUSG00000032410	1599.78	1115.71	2083.85	1.86774	0.901291	1.98985e-05	0.00168375	9	95836813	95939856	+	18585	Xrn1	GO:0000932;GO:0000956;GO:0000956;GO:0003676;GO:0004518;GO:0004527;GO:0004527;GO:0004534;GO:0005634;GO:0005829;GO:0005886;GO:0008409;GO:0016075;GO:0016787;GO:0017148;GO:0030425;GO:0033574;GO:0043025;GO:0045202;GO:0071028;GO:0071044;GO:0071409;GO:0090305;GO:0090503;GO:1905795;GO:0000956;GO:0003676;GO:0003723;GO:0004518;GO:0004527;GO:0004527;GO:0005737;GO:0008409;GO:0016787;GO:0090305;GO:0003676;GO:…	K12618	EC:3.1.13.-	A;D;L	1AXWF;KOG2044;KOG2045;1D0NE;12PDD;0UI8C;0A0B2;18YMY;0DMCM;0V9P8	5'-3' exoribonuclease 1 [Source:MGI Symbol;Acc:MGI:891964]	24127	A0A087WQN7
ENSMUSG00000018930	13754.4	10315.4	17193.3	1.66676	0.737044	1.99742e-05	0.00168375	11	83553410	83555509	+	660	Ccl4	GO:0002548;GO:0005125;GO:0005515;GO:0005576;GO:0005576;GO:0005615;GO:0005615;GO:0005615;GO:0006935;GO:0006954;GO:0006954;GO:0006954;GO:0006955;GO:0007165;GO:0007186;GO:0008009;GO:0008009;GO:0008009;GO:0009636;GO:0030593;GO:0030595;GO:0031726;GO:0031730;GO:0032760;GO:0035690;GO:0042802;GO:0043117;GO:0043547;GO:0043922;GO:0048020;GO:0048245;GO:0048247;GO:0050850;GO:0051928;GO:0060326;GO:0070098;GO:…	K12964	-	W;T	13X8V;1B6HY;0UVZK;196B4;1D4A0;0DUZ9;0J4I9;0A8E2;0VJA1	chemokine (C-C motif) ligand 4 [Source:MGI Symbol;Acc:MGI:98261]	20303	P14097;Q5QNV9
ENSMUSG00000069793	5298.81	3231.03	7366.59	2.27995	1.189	2.01789e-05	0.00169118	11	82869216	82882656	-	5965	Slfn9	GO:0000049;GO:0000166;GO:0004518;GO:0004519;GO:0004521;GO:0005524;GO:0005634;GO:0005737;GO:0005737;GO:0008270;GO:0016787;GO:0046872;GO:0051607;GO:0090305;GO:0090502;GO:0000049;GO:0000166;GO:0004518;GO:0004519;GO:0004521;GO:0005524;GO:0005634;GO:0005737;GO:0005737;GO:0008270;GO:0016787;GO:0046872;GO:0051607;GO:0090305;GO:0090502;	K24459	EC:3.1.-.-	S	13MK6;0DNJW;1CXGY;0IJEW;0VBV2;1ATW2;0A0YK;0UNAG	schlafen 9 [Source:MGI Symbol;Acc:MGI:2445121]	237886	B1ARD6
ENSMUSG00000021367	3083.57	1688.86	4478.27	2.65166	1.40689	2.11502e-05	0.0017624	13	42454952	42461466	+	2139	Edn1	GO:0000122;GO:0000122;GO:0001501;GO:0001516;GO:0001516;GO:0001569;GO:0001666;GO:0001666;GO:0001701;GO:0001821;GO:0001821;GO:0003100;GO:0003100;GO:0003100;GO:0005102;GO:0005125;GO:0005125;GO:0005179;GO:0005179;GO:0005179;GO:0005515;GO:0005576;GO:0005576;GO:0005615;GO:0005615;GO:0005615;GO:0005615;GO:0005737;GO:0005737;GO:0006874;GO:0006885;GO:0007166;GO:0007166;GO:0007186;GO:0007186;GO:0007193;GO:…	K16366	-	T;W	0UM0E;0V842;13QFQ;0IWVG;09X5H;192NH;1AWGE;0DIGI;1CT73	endothelin 1 [Source:MGI Symbol;Acc:MGI:95283]	13614	P22387;Q544E0
ENSMUSG00000026425	3377.7	2664.53	4090.87	1.53531	0.618529	2.19975e-05	0.00181468	1	131212989	131455090	-	12560	Srgap2	GO:0003363;GO:0005096;GO:0005096;GO:0005634;GO:0005634;GO:0005654;GO:0005737;GO:0005737;GO:0005737;GO:0005743;GO:0005829;GO:0005829;GO:0005886;GO:0005886;GO:0007165;GO:0007399;GO:0014069;GO:0016020;GO:0021816;GO:0030027;GO:0030027;GO:0030054;GO:0030336;GO:0031267;GO:0031267;GO:0031267;GO:0031410;GO:0034446;GO:0042802;GO:0042803;GO:0042803;GO:0042995;GO:0043197;GO:0043547;GO:0043547;GO:0044327;GO:…	K07526	-	Z;T	0WG1E;KOG3565;13BRX;0E7SN;1DESG;0B3MI;1BASE;0V2U9	SLIT-ROBO Rho GTPase activating protein 2 [Source:MGI Symbol;Acc:MGI:109605]	14270	Q91Z67
ENSMUSG00000050395	2459.64	1447.71	3471.57	2.39798	1.26182	2.2028e-05	0.00181468	4	63642840	63663350	-	5828	Tnfsf15	GO:0005164;GO:0005576;GO:0006915;GO:0006955;GO:0007165;GO:0016020;GO:0016020;	K05478	-	T	1CQ9X;18TDI;1ASMK;0V59S;0IFSK;09UAN;0UG1W;13NWF;0DFK9	tumor necrosis factor (ligand) superfamily, member 15 [Source:MGI Symbol;Acc:MGI:2180140]	326623	Q5UBV8;A0A0U5J7F3;B2RR33
ENSMUSG00000026360	101	57.084	144.916	2.53864	1.34406	2.27932e-05	0.00186711	1	143875076	143879899	-	3627	Rgs2	GO:0001965;GO:0001965;GO:0001975;GO:0005096;GO:0005096;GO:0005096;GO:0005096;GO:0005515;GO:0005634;GO:0005634;GO:0005634;GO:0005730;GO:0005737;GO:0005737;GO:0005737;GO:0005737;GO:0005829;GO:0005829;GO:0005829;GO:0005886;GO:0005886;GO:0005886;GO:0005886;GO:0006417;GO:0007049;GO:0007186;GO:0007283;GO:0007420;GO:0008277;GO:0008277;GO:0008277;GO:0009898;GO:0009898;GO:0009898;GO:0009968;GO:0010519;GO:…	K18154	-	T	18WT3;0DMVA;1CWQX;0VB4N;0UR2N;1B319;13HZP;KOG3589;0A08R	regulator of G-protein signaling 2 [Source:MGI Symbol;Acc:MGI:1098271]	19735	O08849
ENSMUSG00000038884	260	178.355	341.646	1.91553	0.937747	2.38652e-05	0.00193717	9	20779938	20785603	+	3417	Shfl	GO:0000932;GO:0000932;GO:0000932;GO:0003723;GO:0003723;GO:0003723;GO:0005634;GO:0005634;GO:0005634;GO:0005654;GO:0005654;GO:0005737;GO:0005737;GO:0005737;GO:0005829;GO:0005829;GO:0006449;GO:0006449;GO:0006449;GO:0034340;GO:0034340;GO:0034340;GO:0034341;GO:0034341;GO:0034341;GO:0034342;GO:0034342;GO:0034342;GO:0035456;GO:0035456;GO:0035456;GO:0042802;GO:0043022;GO:0043022;GO:0043022;GO:0045071;GO:…	-	-	S	18V22;0V8GE;0UHX4;0IPDV;0DIVQ;1B4CF;13NYA;09XI9;1CPGF	shiftless antiviral inhibitor of ribosomal frameshifting [Source:MGI Symbol;Acc:MGI:2441788]	319278	Q8CAK3
ENSMUSG00000037997	729.096	478.765	979.427	2.04574	1.03262	2.39287e-05	0.00193717	6	127423803	127471224	+	7026	Parp11	GO:0003950;GO:0003950;GO:0005634;GO:0005635;GO:0005643;GO:0005643;GO:0005654;GO:0005829;GO:0006998;GO:0007283;GO:0015031;GO:0016604;GO:0016740;GO:0016757;GO:0030154;GO:0051028;GO:0070213;GO:0070213;GO:0140289;GO:0140289;GO:1990404;GO:1990404;GO:0003950;GO:0003950;GO:0005634;GO:0005635;GO:0005643;GO:0005643;GO:0005654;GO:0005829;GO:0006998;GO:0007283;GO:0015031;GO:0016604;GO:0016740;GO:0016757;GO:…	K15259	EC:2.4.2.30	S	0IJ12;1CTF5;09XCN;0UM9R;0V8AR;0DIQ3;1915I;12QG7;1AWRZ	poly (ADP-ribose) polymerase family, member 11 [Source:MGI Symbol;Acc:MGI:2141505]	101187	Q8CFF0
ENSMUSG00000040043	350.197	248.813	451.581	1.81494	0.859925	2.40493e-05	0.00193717	10	127967427	128016166	-	4484	Rbms2	GO:0003676;GO:0003723;GO:0003723;GO:1990904;GO:0003676;GO:0003723;GO:0003723;GO:1990904;GO:0003676;GO:0003723;GO:0003723;GO:0003723;GO:0003730;GO:0005634;GO:0005634;GO:0005829;GO:0008143;GO:0008266;GO:1990904;GO:1990904;	-	-	S	1AXI3;13MYP;1CRND;0DGY4;18W8W;0V6NN;0USJP;KOG4733;09VPN	RNA binding motif, single stranded interacting protein 2 [Source:MGI Symbol;Acc:MGI:1861776]	56516	Q8VC70
ENSMUSG00000001123	3660.54	2516.29	4804.79	1.90947	0.933172	2.51455e-05	0.00201428	11	78853800	78875772	-	2137	Lgals9	GO:0001819;GO:0002376;GO:0005102;GO:0005515;GO:0005576;GO:0005576;GO:0005634;GO:0005634;GO:0005737;GO:0005829;GO:0005829;GO:0006935;GO:0007157;GO:0007565;GO:0010628;GO:0010628;GO:0010629;GO:0010862;GO:0016936;GO:0016936;GO:0016936;GO:0019899;GO:0030246;GO:0030246;GO:0030246;GO:0032496;GO:0032689;GO:0032689;GO:0032722;GO:0032732;GO:0032733;GO:0032755;GO:0032760;GO:0032815;GO:0032823;GO:0034138;GO:…	K10093	-	W	18WYU;0DFZ8;0A2B2;1CQNQ;1AT4Z;0UHII;KOG3587;0VE63;13QHE	lectin, galactose binding, soluble 9 [Source:MGI Symbol;Acc:MGI:109496]	16859	O08573;G3X9T7
ENSMUSG00000057346	48.3769	20.6314	76.1224	3.68964	1.88348	2.78356e-05	0.00221752	15	77287989	77295335	-	5953	Apol9a	GO:0005575;GO:0005576;GO:0006869;GO:0008150;GO:0008289;GO:0008289;GO:0042157;GO:0005575;GO:0005576;GO:0006869;GO:0008150;GO:0008289;GO:0008289;GO:0042157;GO:0005575;GO:0005576;GO:0006869;GO:0008150;GO:0008289;GO:0008289;GO:0042157;	K14480	-	-	-	apolipoprotein L 9a [Source:MGI Symbol;Acc:MGI:3606001]	223672	Q8VDU3
ENSMUSG00000044313	55.2315	25.1816	85.2814	3.38665	1.75986	2.88881e-05	0.00228879	3	101720392	101756275	-	3610	Mab21l3	GO:0003674;GO:0005575;GO:0008150;GO:0003674;GO:0005575;GO:0008150;	-	-	T	0DKIA;12SU8;0A0FZ;1ASMI;18W0J;1CVCC;0UQMT;0V9M1;KOG3963	mab-21-like 3 [Source:MGI Symbol;Acc:MGI:2446273]	242125	Q8CI17
ENSMUSG00000034947	3147.69	2491.9	3803.48	1.52634	0.610076	2.92989e-05	0.00230873	11	101473068	101482614	+	3138	Tmem106a	GO:0002376;GO:0003674;GO:0005886;GO:0016020;GO:0016021;GO:0032611;GO:0032635;GO:0032640;GO:0035780;GO:0035781;GO:0042116;GO:0043123;GO:0043410;GO:0045087;GO:0045348;GO:1904407;GO:0002376;GO:0003674;GO:0005886;GO:0016020;GO:0016021;GO:0032611;GO:0032635;GO:0032640;GO:0035780;GO:0035781;GO:0042116;GO:0043123;GO:0043410;GO:0045087;GO:0045348;GO:1904407;GO:0016020;GO:0016021;GO:0016020;GO:0016021;	-	-	S	192QM;0V9VH;13MR5;0UPAB;1CV6S;09YXT;0DKCV;0IJ5J;1AU80	transmembrane protein 106A [Source:MGI Symbol;Acc:MGI:1922056]	217203	Q8VC04
ENSMUSG00000031668	248.439	326.774	170.104	0.520556	-0.941874	2.95536e-05	0.0023162	6	70821499	70882229	+	6026	Eif2ak3	GO:0001503;GO:0001525;GO:0004672;GO:0004674;GO:0004694;GO:0004694;GO:0005524;GO:0005789;GO:0006468;GO:0006468;GO:0006983;GO:0010575;GO:0010628;GO:0019899;GO:0019903;GO:0030968;GO:0031018;GO:0032055;GO:0034198;GO:0034976;GO:0036492;GO:0042149;GO:0042802;GO:0045943;GO:0046777;GO:0046777;GO:0048471;GO:0051879;GO:0070417;GO:1902235;GO:1990737;	K08860	EC:2.7.11.1	J	0UP3F;1CS21;190FY;1AW24;0DHBV;09W2R;0V711;12RKW;KOG1033	eukaryotic translation initiation factor 2 alpha kinase 3 [Source:MGI Symbol;Acc:MGI:1341830]	13666	Q9Z2B5;A0A0R4J1Y1
ENSMUSG00000021559	1676.39	2043.02	1309.75	0.641085	-0.641413	3.00676e-05	0.00234381	13	60749761	60911005	+	9012	Dapk1	GO:0000166;GO:0004672;GO:0004672;GO:0004674;GO:0004674;GO:0004674;GO:0004683;GO:0005515;GO:0005515;GO:0005516;GO:0005516;GO:0005524;GO:0005524;GO:0005524;GO:0005525;GO:0005634;GO:0005737;GO:0005737;GO:0005829;GO:0005886;GO:0006417;GO:0006468;GO:0006468;GO:0006468;GO:0006915;GO:0006915;GO:0006915;GO:0007165;GO:0008625;GO:0010508;GO:0015629;GO:0016301;GO:0016310;GO:0016740;GO:0017075;GO:0017148;GO:…	K08803	EC:2.7.11.1	T	1CUEC;0UMX4;0V5NV;09UP8;0DJ6Y;1ARM4;KOG0032;18SCI;12QZY	death associated protein kinase 1 [Source:MGI Symbol;Acc:MGI:1916885]	69635	Q80YE7;Q3UKP8
ENSMUSG00000018899	6599.87	5271.2	7928.55	1.50413	0.588927	3.14801e-05	0.0024408	11	53660841	53669200	+	3975	Irf1	GO:0000785;GO:0000785;GO:0000976;GO:0000976;GO:0000976;GO:0000976;GO:0000978;GO:0000978;GO:0000978;GO:0000981;GO:0000981;GO:0001228;GO:0001228;GO:0002376;GO:0002376;GO:0002819;GO:0003677;GO:0003677;GO:0003700;GO:0003700;GO:0005515;GO:0005515;GO:0005515;GO:0005515;GO:0005634;GO:0005634;GO:0005634;GO:0005737;GO:0006355;GO:0006357;GO:0006915;GO:0006915;GO:0006915;GO:0006915;GO:0007050;GO:0007050;GO:…	K09444	-	K	1925D;1AX39;13CX1;0IER3;0DIYB;1CTPS;0UM2B;0VF97;0A4EA	interferon regulatory factor 1 [Source:MGI Symbol;Acc:MGI:96590]	16362	P15314;Q5SX13
ENSMUSG00000026814	2283.8	1789.78	2777.83	1.55205	0.634173	3.31311e-05	0.00255515	2	32536607	32572681	+	4048	Eng	GO:0016020;GO:0016021;GO:0000122;GO:0001525;GO:0001525;GO:0001525;GO:0001569;GO:0001570;GO:0001570;GO:0001570;GO:0001570;GO:0001666;GO:0001837;GO:0001934;GO:0001934;GO:0001937;GO:0001947;GO:0003084;GO:0003148;GO:0003198;GO:0003203;GO:0003208;GO:0003209;GO:0003222;GO:0003273;GO:0005024;GO:0005114;GO:0005114;GO:0005114;GO:0005515;GO:0005534;GO:0005534;GO:0005539;GO:0005539;GO:0005539;GO:0005615;GO:…	K06526	-	T	0V98M;0UN8W;13KN7;1AXS3;1CVVT;0A2J0;0IQ57;0DQ6I;190QN	endoglin [Source:MGI Symbol;Acc:MGI:95392]	13805	Q63961;Q3UAM9
ENSMUSG00000039841	3698.02	2769.86	4626.19	1.67019	0.740013	3.37025e-05	0.00258546	6	28239926	28398004	-	4831	Zfp800	GO:0003677;GO:0005634;GO:0008150;GO:0046872;GO:0003677;GO:0005634;GO:0008150;GO:0046872;GO:0003677;GO:0005634;GO:0008150;GO:0046872;GO:0005634;	-	-	K	1ARF6;0VB73;12SQ4;1CWTN;0DMXS;0A0B0;KOG1721;0UFJA;18S5X	zinc finger protein 800 [Source:MGI Symbol;Acc:MGI:1889334]	627049	Q0VEE6;B7ZMR9
ENSMUSG00000041707	211.429	292.874	129.983	0.44382	-1.17195	3.62462e-05	0.00276596	14	32507920	32539941	+	1604	Tmem273	GO:0003674;GO:0005575;GO:0008150;GO:0016020;GO:0016021;GO:0003674;GO:0005575;GO:0008150;GO:0003674;GO:0005575;GO:0008150;GO:0016020;GO:0016021;GO:0003674;GO:0005575;GO:0008150;	-	-	S	196MR;0VMQ8;1D5M3;0J40J;13X2G;1B6ZU;0UWRA;0AAR9;0DWBT	transmembrane protein 273 [Source:MGI Symbol;Acc:MGI:1916319]	69069	E9PVZ2
ENSMUSG00000022964	1296.11	1008.07	1584.15	1.57147	0.652114	3.66884e-05	0.00278505	16	91371391	91394688	-	2446	Tmem50b	GO:0000139;GO:0005783;GO:0005783;GO:0005783;GO:0005789;GO:0005794;GO:0016020;GO:0016021;GO:0032511;GO:0016020;GO:0016021;GO:0016020;GO:0016021;	-	-	S	190YM;0DIWZ;1D1SC;13SPV;0VE4X;1AZUC;0UQ44;0A3A6;KOG3393	transmembrane protein 50B [Source:MGI Symbol;Acc:MGI:1925225]	77975	Q9D1X9
ENSMUSG00000027293	3003.1	1769.87	4236.34	2.39358	1.25917	3.83289e-05	0.00289443	2	119919656	119985087	-	4007	Ehd4	GO:0000166;GO:0005509;GO:0005515;GO:0005515;GO:0005524;GO:0005525;GO:0005768;GO:0005769;GO:0005783;GO:0005783;GO:0005886;GO:0005886;GO:0005886;GO:0006897;GO:0006907;GO:0006907;GO:0010008;GO:0016020;GO:0016197;GO:0030100;GO:0030100;GO:0030139;GO:0031901;GO:0032456;GO:0032456;GO:0032456;GO:0032456;GO:0032456;GO:0043231;GO:0046872;GO:0048471;GO:0048471;GO:0050731;GO:0050731;GO:0051260;GO:0051260;GO:…	K12477	-	T;U	1ASKS;0V6UU;1CTEH;0USGH;09XC5;12N3T;KOG1954;0DIPJ;18U9Z	EH-domain containing 4 [Source:MGI Symbol;Acc:MGI:1919619]	98878	Q9EQP2;Q3TM70
ENSMUSG00000019082	1156.94	736.26	1577.61	2.14274	1.09946	3.85836e-05	0.00289857	7	141009657	141017805	-	5992	Slc25a22	GO:0005313;GO:0005313;GO:0005313;GO:0005313;GO:0005739;GO:0005739;GO:0005743;GO:0005743;GO:0005743;GO:0015183;GO:0015293;GO:0015810;GO:0015813;GO:0015813;GO:0015813;GO:0015813;GO:0016020;GO:0016021;GO:0022857;GO:0043490;GO:0055085;GO:0070778;GO:0005313;GO:0005313;GO:0005313;GO:0005739;GO:0005739;GO:0005743;GO:0005743;GO:0015183;GO:0015293;GO:0015810;GO:0015813;GO:0015813;GO:0015813;GO:0016020;GO:…	K15107	-	-	-	solute carrier family 25 (mitochondrial carrier, glutamate), member 22 [Source:MGI Symbol;Acc:MGI:1915517]	68267	Q9D6M3;Q80X52
ENSMUSG00000015396	2582.79	1859.64	3305.94	1.77773	0.830035	3.92895e-05	0.00293638	13	43938251	43956608	+	2572	Cd83	GO:0009897;GO:0014070;GO:0016020;GO:0016021;GO:0032713;GO:0032733;GO:0032743;GO:0043372;	K06510	-	T	0VD34;1AS84;18T2R;1CYUQ;0UT62;0DPVA;13JQF;0A279;0IKX7	CD83 antigen [Source:MGI Symbol;Acc:MGI:1328316]	12522	O88324
ENSMUSG00000024642	1308.35	905.865	1710.83	1.88862	0.917332	4.04089e-05	0.00299944	19	14425514	14575415	-	5702	Tle4	GO:0000122;GO:0000981;GO:0003682;GO:0003714;GO:0003714;GO:0003714;GO:0005515;GO:0005515;GO:0005515;GO:0005634;GO:0005634;GO:0005634;GO:0005634;GO:0005654;GO:0005667;GO:0006355;GO:0016055;GO:0016055;GO:0045892;GO:0045892;GO:0070491;GO:0070491;GO:0090090;GO:1990830;GO:1990907;GO:0005634;GO:0005634;GO:0006355;GO:0016055;	K04497	-	B	12N8K;KOG0639;1AU2W;18V3S;09TIM;0V4HK;1CPIZ;0DEV8;0UIJ0	transducin-like enhancer of split 4 [Source:MGI Symbol;Acc:MGI:104633]	21888	Q62441;Q3UY41
ENSMUSG00000003226	4778.42	3557.85	5999	1.68613	0.753715	4.06307e-05	0.00299944	10	58282742	58330178	+	11728	Ranbp2	GO:0000413;GO:0001975;GO:0003723;GO:0003755;GO:0005096;GO:0005515;GO:0005515;GO:0005634;GO:0005635;GO:0005635;GO:0005635;GO:0005642;GO:0005642;GO:0005643;GO:0005643;GO:0005643;GO:0005643;GO:0005654;GO:0005737;GO:0005739;GO:0006111;GO:0006457;GO:0006607;GO:0006607;GO:0015031;GO:0016020;GO:0016740;GO:0016925;GO:0016925;GO:0019789;GO:0031267;GO:0031267;GO:0031965;GO:0031965;GO:0033133;GO:0042405;GO:…	K12172	EC:2.3.2.-	O;U	1CX8K;0URNE;12N77;0DNBH;KOG0864;KOG0865;0A0Q9;0VBKF;1AZAA;18U93	RAN binding protein 2 [Source:MGI Symbol;Acc:MGI:894323]	19386	Q9ERU9
ENSMUSG00000024397	1125	725.737	1524.26	2.10029	1.07059	4.0797e-05	0.00299944	17	35389967	35395044	-	1532	Aif1	GO:0001726;GO:0001774;GO:0001891;GO:0001891;GO:0001934;GO:0003779;GO:0005509;GO:0005509;GO:0005509;GO:0005515;GO:0005634;GO:0005634;GO:0005737;GO:0005737;GO:0005829;GO:0005829;GO:0005856;GO:0005884;GO:0005884;GO:0005884;GO:0005886;GO:0006911;GO:0006954;GO:0008284;GO:0010629;GO:0014739;GO:0016020;GO:0016601;GO:0030027;GO:0030027;GO:0030041;GO:0030041;GO:0030046;GO:0030335;GO:0032587;GO:0032587;GO:…	K18617	-	Z	1B9UU;0KCUI;0WCBX;196QP;0E5D9;0V0WA;0AZVH;14T07;1DCDB	allograft inflammatory factor 1 [Source:MGI Symbol;Acc:MGI:1343098]	11629	O70200;Q4FJL9
ENSMUSG00000055435	3329.6	2173.56	4485.64	2.06372	1.04525	4.09607e-05	0.00299944	8	116409681	116434533	-	8241	Maf	GO:0000122;GO:0000978;GO:0000981;GO:0000981;GO:0001228;GO:0002088;GO:0003677;GO:0003677;GO:0003677;GO:0003690;GO:0003700;GO:0003700;GO:0005515;GO:0005515;GO:0005634;GO:0005634;GO:0005634;GO:0005654;GO:0005737;GO:0006355;GO:0006355;GO:0006357;GO:0010628;GO:0032330;GO:0042802;GO:0043565;GO:0044877;GO:0045944;GO:0048468;GO:0048839;GO:0070306;GO:0070306;GO:1990837;GO:1990837;GO:0000122;GO:0000978;GO:…	K09035	-	K	0DM6M;0VAJN;0UUMW;1AZW4;KOG4196;13UZ2;09ZNW;1962F;1CW1U	avian musculoaponeurotic fibrosarcoma oncogene homolog [Source:MGI Symbol;Acc:MGI:96909]	17132	P54843
ENSMUSG00000043263	2124.3	913.257	3335.33	3.65213	1.86874	4.31923e-05	0.0031443	1	173458483	173475494	+	3547	Ifi209	GO:0000122;GO:0000978;GO:0001227;GO:0002218;GO:0003690;GO:0003690;GO:0005634;GO:0005634;GO:0005654;GO:0005730;GO:0005829;GO:0008134;GO:0035458;GO:0035458;GO:0035458;GO:0042802;GO:0002218;GO:0035458;	-	-	K	1CTDT;0UM8D;0DINX;0J5NP;194Q0;1B2J8;1408X;0V89T;09XBF	interferon activated gene 209 [Source:MGI Symbol;Acc:MGI:2138243]	236312	Q8BV49
ENSMUSG00000027514	3037.52	1796.04	4279	2.38246	1.25245	4.33727e-05	0.0031443	2	173048405	173060716	-	3529	Zbp1	GO:0003677;GO:0005515;GO:0051607;GO:0060340;GO:0002218;GO:0002376;GO:0003677;GO:0003677;GO:0003677;GO:0003677;GO:0003692;GO:0003723;GO:0003725;GO:0005515;GO:0005634;GO:0005634;GO:0005634;GO:0005737;GO:0005737;GO:0005829;GO:0005829;GO:0006915;GO:0012501;GO:0016032;GO:0042802;GO:0043065;GO:0045087;GO:0050727;GO:0050729;GO:0051607;GO:0051607;GO:0060340;GO:0060340;GO:0060340;GO:0060545;GO:0060545;GO:…	K12965	-	K	192GJ;0J2S4;13Y6T;0A251;1B3EH;1CYSE;0VBK5;0UT4C;0DPT8	Z-DNA binding protein 1 [Source:MGI Symbol;Acc:MGI:1927449]	58203	Q9QY24
ENSMUSG00000026640	1079.06	1321.63	836.5	0.632932	-0.659878	4.45349e-05	0.0032125	1	194300526	194499177	+	17174	Plxna2	GO:0001756;GO:0002116;GO:0005515;GO:0005886;GO:0005886;GO:0005887;GO:0005887;GO:0007162;GO:0007165;GO:0007166;GO:0008360;GO:0016020;GO:0016021;GO:0017154;GO:0017154;GO:0017154;GO:0017154;GO:0021915;GO:0021935;GO:0030334;GO:0030334;GO:0042802;GO:0043087;GO:0050772;GO:0051642;GO:0060037;GO:0060174;GO:0062023;GO:0071526;GO:0071526;GO:1902287;GO:0016020;GO:0017154;GO:0071526;	K06820	-	T	1BAPR;0E7KX;0B3BK;0WFQ5;0IN3A;1DEMA;13B9V;0V2QW	plexin A2 [Source:MGI Symbol;Acc:MGI:107684]	18845	P70207
ENSMUSG00000039146	3152.98	1799.84	4506.12	2.50362	1.32401	4.56581e-05	0.00325723	3	151464374	151468529	-	1376	Ifi44l	GO:0005737;	-	-	S	0V4Y2;0DF95;12T23;1AUP3;0UGGH;09TZ5;0IDX3;1CPYR	interferon-induced protein 44 like [Source:MGI Symbol;Acc:MGI:95975]	15061	Q9BDB7
ENSMUSG00000030064	1217.87	810.263	1625.48	2.00612	1.00441	4.56869e-05	0.00325723	6	97263828	97594502	-	14302	Frmd4b	GO:0001726;GO:0005515;GO:0005737;GO:0005737;GO:0005856;GO:0005856;GO:0005912;GO:0005912;GO:0005923;GO:0005923;GO:0030054;GO:0090162;GO:0005737;GO:0005856;GO:0001726;GO:0005515;GO:0005737;GO:0005737;GO:0005856;GO:0005856;GO:0005912;GO:0005912;GO:0005923;GO:0005923;GO:0030054;GO:0090162;GO:0005856;	K23970	-	Z;S	138F6;09Y1E;KOG3529;18XNI;0VF1Q;0DPGB;1AZU5;1D14D;0UTPC	FERM domain containing 4B [Source:MGI Symbol;Acc:MGI:2141794]	232288	Q920B0
ENSMUSG00000021624	1996.54	1414.42	2578.66	1.82312	0.866409	4.60546e-05	0.00325723	13	102830066	102876137	+	4509	Cd180	GO:0002224;GO:0002322;GO:0002322;GO:0002376;GO:0004888;GO:0005515;GO:0005615;GO:0005886;GO:0006954;GO:0006955;GO:0016020;GO:0016021;GO:0016021;GO:0031012;GO:0031666;GO:0031666;GO:0031666;GO:0045087;GO:0071222;GO:0071222;GO:0002224;GO:0004888;GO:0006955;GO:0016021;GO:0002224;GO:0004888;GO:0006955;GO:0016021;	K06555	-	T	1ARQB;0UM04;0A1C6;1CZFT;0DQDU;190C4;0VDMJ;13HS0;KOG4641	CD180 antigen [Source:MGI Symbol;Acc:MGI:1194924]	17079	Q62192
ENSMUSG00000027433	2728.79	2039.06	3418.52	1.67652	0.745468	4.63487e-05	0.00325723	2	146854916	146919920	+	3981	Xrn2	GO:0000175;GO:0000738;GO:0000738;GO:0000738;GO:0000956;GO:0001147;GO:0001147;GO:0001147;GO:0003676;GO:0003677;GO:0003723;GO:0004518;GO:0004527;GO:0004527;GO:0004534;GO:0004534;GO:0004534;GO:0005515;GO:0005634;GO:0005634;GO:0005634;GO:0005634;GO:0005634;GO:0005654;GO:0005654;GO:0005730;GO:0005730;GO:0005730;GO:0006139;GO:0006281;GO:0006310;GO:0006353;GO:0006397;GO:0007017;GO:0007283;GO:0007283;GO:…	K12619	EC:3.1.13.-	A;K;L	0DKP1;KOG2044;12PDD;1B1HB;0A0B2;0UIXE;18ZCJ;1CX7K;0V9P8	5'-3' exoribonuclease 2 [Source:MGI Symbol;Acc:MGI:894687]	24128	Q9DBR1
ENSMUSG00000009569	856.149	1054.65	657.648	0.623571	-0.681374	4.6387e-05	0.00325723	16	13074345	13235393	+	8990	Mrtfb	GO:0003713;GO:0045844;GO:0045944;	K22525	-	K	18WXI;0IFJX;0DG5J;09UW4;0V5VV;1CQV6;136KC;0UNJZ;1B1RK	myocardin related transcription factor B [Source:MGI Symbol;Acc:MGI:3050795]	239719	P59759;Q5DTZ3
ENSMUSG00000029798	2751.39	1775.26	3727.53	2.09971	1.07019	4.6503e-05	0.00325723	6	57557985	57641617	+	9292	Herc6	GO:0002244;GO:0002376;GO:0004842;GO:0005654;GO:0005737;GO:0005737;GO:0005829;GO:0005829;GO:0009617;GO:0016567;GO:0016740;GO:0045087;GO:0061630;	K22372	EC:2.3.2.-	O	0UGQB;KOG0941;0DFEK;0VCYN;1AXTH;1CQ4C;18TG8;12NRN;09ZJH	hect domain and RLD 6 [Source:MGI Symbol;Acc:MGI:1914388]	67138	F2Z461
ENSMUSG00000048852	100.869	35.6533	166.085	4.65834	2.21982	4.92488e-05	0.00343298	11	48795483	48883053	-	5587	Gm12185	GO:0003924;GO:0005525;GO:0005789;GO:0006952;GO:0016020;GO:0035458;GO:0003924;GO:0005525;GO:0005789;GO:0006952;GO:0016020;GO:0035458;	-	-	S	0VBXP;13J01;0DQAB;0USXH;1B4GM;0A2NU;1927P;1CZCD;0IJSM	predicted gene 12185 [Source:MGI Symbol;Acc:MGI:3652173]	620913	Q5NCB2
ENSMUSG00000031639	1016.54	526.558	1506.53	2.86109	1.51657	5.02338e-05	0.0034782	8	45848702	45864117	-	5207	Tlr3	GO:0001774;GO:0001774;GO:0001819;GO:0002224;GO:0002224;GO:0002224;GO:0002224;GO:0002376;GO:0002730;GO:0002756;GO:0003723;GO:0003725;GO:0003725;GO:0003725;GO:0003725;GO:0003725;GO:0004888;GO:0005515;GO:0005737;GO:0005737;GO:0005768;GO:0005769;GO:0005783;GO:0005789;GO:0005887;GO:0006952;GO:0006954;GO:0006954;GO:0006955;GO:0007165;GO:0007252;GO:0007252;GO:0008584;GO:0009615;GO:0009615;GO:0009986;GO:…	K05401	-	T	12RIS;18SQU;1CWQB;0VB4A;0DMUU;1B0FE;0UTE4;0A088;KOG4641	toll-like receptor 3 [Source:MGI Symbol;Acc:MGI:2156367]	142980	Q99MB1
ENSMUSG00000037270	1689.85	1251.71	2128	1.70008	0.765602	5.03774e-05	0.0034782	3	36917253	37107182	+	32279	4932438A13Rik	GO:0001558;GO:0003674;GO:0005634;GO:0006629;GO:0006909;GO:0006909;GO:0007283;GO:0016020;GO:0016021;GO:0016197;GO:0016197;GO:0019915;GO:0032456;GO:0032456;GO:0045444;GO:0048488;GO:0051647;GO:0060612;GO:0098793;GO:0006113;GO:0016020;GO:0016021;GO:0016021;GO:0001558;GO:0003674;GO:0005634;GO:0006629;GO:0006909;GO:0006909;GO:0007283;GO:0016020;GO:0016021;GO:0016197;GO:0016197;GO:0019915;GO:0032456;GO:…	-	-	S;Z	0V9WG;0DNUW;18TPH;KOG3596;1CXSA;1B4I9;0UKEW;09YYT;12TYP	RIKEN cDNA 4932438A13 gene [Source:MGI Symbol;Acc:MGI:2444631]	229227	A2AAE1;Q8CDG7
ENSMUSG00000035248	3050.06	2299.88	3800.25	1.65237	0.724539	5.13507e-05	0.0035286	13	59919375	59970961	-	14732	Tut7	GO:0003676;GO:0008270;GO:0003676;GO:0008270;	K13291	EC:2.7.7.52	D	1B2WB;192J1;1CRC2;KOG2277;0V6CM;0USQG;12P8P;09VDN;0DGN5	terminal uridylyl transferase 7 [Source:MGI Symbol;Acc:MGI:2387179]	214290	Q5BLK4;E9PUA2
ENSMUSG00000078920	5897.15	3056.62	8737.68	2.85861	1.51531	5.21996e-05	0.00356423	11	48967414	48987801	+	2473	Ifi47	GO:0003924;GO:0005525;GO:0005783;GO:0005789;GO:0006952;GO:0006952;GO:0016020;GO:0035458;GO:0003924;GO:0005783;GO:0005789;GO:0006952;GO:0006952;GO:0035458;GO:0003924;GO:0005525;GO:0005783;GO:0005789;GO:0006952;GO:0006952;GO:0016020;GO:0035458;GO:0003924;GO:0005525;GO:0005783;GO:0005789;GO:0006952;GO:0006952;GO:0016020;GO:0035458;GO:0003924;GO:0005525;GO:0005783;GO:0005789;GO:0006952;GO:0006952;GO:…	K17072	-	S	0VBXP;13J01;0DQAB;0USXH;0A2NU;1CZCD;0IJSM;195JF;1B4YY	interferon gamma inducible protein 47 [Source:MGI Symbol;Acc:MGI:99448]	15953	Q61635
ENSMUSG00000026548	467.201	202.251	732.151	3.62001	1.85599	5.24539e-05	0.00356423	1	172302925	172306142	+	1313	Slamf9	GO:0016020;GO:0016021;	-	-	S	0UH80;0DJS8;18YVI;1ATB7;09YCE;0V99W;13U3D;1CUJ9;0IZ6Y	SLAM family member 9 [Source:MGI Symbol;Acc:MGI:1923692]	98365	Q9D780;A0A0R4J072
ENSMUSG00000025764	126.661	175.248	78.0752	0.445514	-1.16646	5.28345e-05	0.00356423	3	41510166	41571299	+	8492	Jade1	GO:0000123;GO:0000123;GO:0000123;GO:0003713;GO:0005634;GO:0005634;GO:0005694;GO:0005737;GO:0005737;GO:0005829;GO:0005856;GO:0005886;GO:0006915;GO:0016607;GO:0036064;GO:0042995;GO:0043966;GO:0043966;GO:0043966;GO:0043981;GO:0043981;GO:0043981;GO:0043982;GO:0043982;GO:0043982;GO:0043983;GO:0043983;GO:0045893;GO:0046872;GO:0090090;GO:2000134;GO:0000123;GO:0000123;GO:0000123;GO:0000123;GO:0003713;GO:…	K11347	-	S;K;B;L	1B42B;0DKAV;KOG0954;0UPFJ;1CV4R;09YVQ;0V6JK;18WEV;12RGJ	jade family PHD finger 1 [Source:MGI Symbol;Acc:MGI:1925835]	269424	Q6ZPI0
ENSMUSG00000030966	3559.93	2440.41	4679.44	1.91748	0.939214	5.29882e-05	0.00356423	7	102207128	102214693	-	3714	Trim21	GO:0000209;GO:0003713;GO:0004842;GO:0005634;GO:0005654;GO:0005737;GO:0006513;GO:0008270;GO:0010508;GO:0016567;GO:0019005;GO:0031648;GO:0032088;GO:0032092;GO:0032897;GO:0034341;GO:0042802;GO:0045087;GO:0045787;GO:0045824;GO:0045893;GO:0046598;GO:0046872;GO:0046872;GO:0051091;GO:0051865;GO:0061630;GO:0070534;GO:0090086;GO:1902187;GO:0008270;GO:0045893;GO:0046598;GO:0046872;GO:0046872;	K10651	EC:2.3.2.27	O;K	KOG2177;12QXR;0USXG;09UKA;0DFVY;18XES;1CQJA;0V5JK;1B05T	tripartite motif-containing 21 [Source:MGI Symbol;Acc:MGI:106657]	20821	Q3U7K7;Q3UCL2
ENSMUSG00000023008	471.384	593.074	349.693	0.589627	-0.762125	5.32793e-05	0.00356423	15	99215106	99268363	-	5021	Fmnl3	GO:0001525;GO:0003779;GO:0005515;GO:0005737;GO:0005737;GO:0005794;GO:0005829;GO:0005829;GO:0005886;GO:0005886;GO:0007010;GO:0007010;GO:0007010;GO:0007275;GO:0008360;GO:0008360;GO:0008360;GO:0008360;GO:0016020;GO:0016043;GO:0016477;GO:0016477;GO:0016477;GO:0016477;GO:0022604;GO:0030036;GO:0030866;GO:0032794;GO:0043231;GO:0051015;GO:0003779;GO:0007010;GO:0008360;GO:0016043;GO:0016477;GO:0022604;GO:…	K23957	-	Z;T	12SXZ;1CSIG;1ARYP;KOG1923;0DHU2;0V7H9;09WIR;0UG5M;18SX6	formin-like 3 [Source:MGI Symbol;Acc:MGI:109569]	22379	Q6ZPF4
ENSMUSG00000039501	14998.8	12112.3	17885.3	1.47663	0.562304	5.33442e-05	0.00356423	2	166877713	166904935	-	8189	Znfx1	GO:0003700;GO:0003723;GO:0004386;GO:0005634;GO:0006355;GO:0008270;GO:0031048;GO:0031380;GO:0046872;GO:0003700;GO:0004386;GO:0005634;GO:0006355;GO:0008270;GO:0046872;GO:0004386;GO:0004386;	-	-	L	0V51M;0UFUX;12Q27;1CQ21;0DFCA;09U2N;18SFG;KOG1807;1ARPR	zinc finger, NFX1-type containing 1 [Source:MGI Symbol;Acc:MGI:2138982]	98999	Q8R151
ENSMUSG00000030269	2541.52	2021.54	3061.49	1.51443	0.59878	5.362e-05	0.00356622	6	113214804	113258353	+	3006	Mtmr14	GO:0001726;GO:0001726;GO:0004438;GO:0004438;GO:0004438;GO:0004438;GO:0004725;GO:0005737;GO:0016311;GO:0016787;GO:0035335;GO:0048471;GO:0048471;GO:0004438;GO:0016311;GO:0004438;GO:0016311;GO:0004438;GO:0016311;GO:0004438;GO:0004438;GO:0004725;GO:0016311;GO:0035335;GO:0004438;GO:0004438;GO:0004725;GO:0016311;GO:0035335;GO:0004438;GO:0016311;GO:0004438;GO:0016311;	K18086	-	S	0DEN7;1B1W4;0V4A1;0UFN0;190ZI;1CPC3;0IHSK;130CG;09TAW	myotubularin related protein 14 [Source:MGI Symbol;Acc:MGI:1916075]	97287	Q8VEL2
ENSMUSG00000033088	1336.01	975.088	1696.94	1.74029	0.799329	5.86154e-05	0.00388011	15	78831924	78890069	+	12302	Triobp	GO:0003779;GO:0005515;GO:0005634;GO:0005737;GO:0005815;GO:0005856;GO:0007015;GO:0007049;GO:0007605;GO:0015629;GO:0015629;GO:0030496;GO:0031625;GO:0032420;GO:0032437;GO:0051015;GO:0051015;GO:0051301;GO:0060088;GO:0120044;GO:1900026;GO:1900026;GO:0003779;GO:0005515;GO:0005634;GO:0005737;GO:0005815;GO:0005856;GO:0007015;GO:0007049;GO:0007605;GO:0015629;GO:0015629;GO:0030496;GO:0031625;GO:0032420;GO:…	K23751	-	Z	1CXE1;18Y8F;KOG4807;0UGGN;0A0VG;13I2B;0VBRY;0DNGP;1AXAU	TRIO and F-actin binding protein [Source:MGI Symbol;Acc:MGI:1349410]	110253	Q99KW3
ENSMUSG00000034610	320.121	229.467	410.775	1.79013	0.840063	5.88747e-05	0.00388011	4	108316623	108416618	+	8684	Tut4	GO:0001556;GO:0003676;GO:0004652;GO:0005515;GO:0005515;GO:0005634;GO:0005634;GO:0005634;GO:0005730;GO:0005737;GO:0005737;GO:0005737;GO:0005829;GO:0006378;GO:0006397;GO:0008270;GO:0010526;GO:0010526;GO:0010586;GO:0010586;GO:0010587;GO:0010587;GO:0016740;GO:0016779;GO:0016779;GO:0019827;GO:0019827;GO:0031047;GO:0031054;GO:0031054;GO:0031054;GO:0031123;GO:0031123;GO:0031664;GO:0032088;GO:0032755;GO:…	K13291	EC:2.7.7.52	D;B	18YTG;1B14S;1CRC2;KOG2277;0V6CM;12P8P;0UMEP;09VDN;0DGN5	terminal uridylyl transferase 4 [Source:MGI Symbol;Acc:MGI:2445126]	230594	B2RX14;Q9EQN6;Q3V3D5
ENSMUSG00000063694	1366.96	1073.09	1660.84	1.54771	0.630137	5.9745e-05	0.00389015	6	50539543	50543518	-	3404	Cycs	GO:0005634;GO:0005739;GO:0005739;GO:0005758;GO:0005758;GO:0005758;GO:0005829;GO:0005829;GO:0006122;GO:0006123;GO:0006915;GO:0006915;GO:0008635;GO:0009055;GO:0019899;GO:0020037;GO:0020037;GO:0022900;GO:0042743;GO:0043209;GO:0043280;GO:0043393;GO:0045155;GO:0046872;GO:0055114;GO:0070469;	K08738	-	C	0A7MI;193A5;0UVKJ;0VJKE;13SJE;1D3NI;1B5XJ;0DUA0;KOG3453	cytochrome c, somatic [Source:MGI Symbol;Acc:MGI:88578]	13063	P62897;Q56A15
ENSMUSG00000023353	540.621	675.357	405.885	0.600993	-0.734579	5.97989e-05	0.00389015	5	24657175	24707045	+	5321	Agap3	GO:0000166;GO:0003924;GO:0005096;GO:0005096;GO:0005525;GO:0005525;GO:0007165;GO:0016020;GO:0043547;GO:0046872;GO:0000166;GO:0003924;GO:0005525;GO:0005525;GO:0007165;GO:0016020;GO:0000166;GO:0003924;GO:0005525;GO:0005525;GO:0007165;GO:0016020;GO:0005096;GO:0043547;GO:0046872;	K12491	-	T	0UJDJ;KOG0705;0DIV8;1960I;0V8FU;09XHT;1CTKK;1AWZM;12RB5	ArfGAP with GTPase domain, ankyrin repeat and PH domain 3 [Source:MGI Symbol;Acc:MGI:2183446]	213990	-
ENSMUSG00000072568	68.9895	34.3514	103.628	3.0167	1.59297	5.98319e-05	0.00389015	15	60690843	60725627	-	5926	Lratd2	GO:0003674;GO:0005737;GO:0005737;GO:0005886;GO:0005886;GO:0008150;	K22810	-	O	1B24Z;12RYQ;0IGIG;0DFEX;0UM5M;18SR5;0VFQI;0A4W2;1CZ3E	LRAT domain containing 1 [Source:MGI Symbol;Acc:MGI:3026924]	399603	D3YXJ5
ENSMUSG00000028268	6456.78	4074.83	8838.73	2.1691	1.1171	6.05109e-05	0.00391673	3	142265787	142278970	+	3265	Gbp3	GO:0003924;GO:0005525;GO:0000139;GO:0000166;GO:0003924;GO:0003924;GO:0003924;GO:0005525;GO:0005525;GO:0005525;GO:0005634;GO:0005634;GO:0005737;GO:0005794;GO:0005794;GO:0005829;GO:0005886;GO:0016020;GO:0016787;GO:0020005;GO:0031410;GO:0031410;GO:0035458;GO:0042803;GO:0042832;GO:0042832;GO:0044406;GO:0048471;GO:0048471;GO:0050830;GO:0050830;GO:0071346;GO:0071346;GO:0003924;GO:0005525;GO:0000139;GO:…	K20899	-	S;O;T;D;C;K	191WI;0V9BC;134KU;09XSJ;1AYRV;KOG2037;1CUKV;0UNNF;0DJTQ	guanylate binding protein 3 [Source:MGI Symbol;Acc:MGI:1926263]	55932	Q61107
ENSMUSG00000037816	978.264	759.378	1197.15	1.57649	0.656715	6.20911e-05	0.00400115	13	50571900	50587816	+	3818	Fbxw17	GO:0003674;GO:0005575;GO:0003674;GO:0005575;GO:0003674;GO:0005575;GO:0003674;GO:0005575;GO:0003674;GO:0005575;	K10267	-	S	0DIBC;0UKSH;1B0K4;13NKZ;0IHPA;0V7YZ;18ZDA;09X0T;1CT1V	F-box and WD-40 domain protein 17 [Source:MGI Symbol;Acc:MGI:1923584]	109082	Q8CFE8
ENSMUSG00000018927	259.594	182.02	337.168	1.85236	0.889367	6.38844e-05	0.00409154	11	83478708	83483913	-	1795	Ccl6	GO:0002548;GO:0005125;GO:0005576;GO:0005576;GO:0005615;GO:0005615;GO:0006935;GO:0006954;GO:0006955;GO:0007186;GO:0008009;GO:0008009;GO:0008009;GO:0030593;GO:0043547;GO:0048020;GO:0048247;GO:0060326;GO:0070098;GO:0070374;GO:0071346;GO:0071347;GO:0071356;	K05510	-	S;W	0UWKV;0VME9;0AABB;0DW78;0J4DG;1B6U5;1D5GZ;13Y4A	chemokine (C-C motif) ligand 6 [Source:MGI Symbol;Acc:MGI:98263]	20305	P27784
ENSMUSG00000038612	13051	10373.6	15728.5	1.5162	0.600459	6.40583e-05	0.00409154	3	95566099	95570487	+	3418	Mcl1	GO:0005515;GO:0005515;GO:0005515;GO:0005634;GO:0005634;GO:0005634;GO:0005654;GO:0005737;GO:0005737;GO:0005739;GO:0005739;GO:0005739;GO:0005739;GO:0005741;GO:0005829;GO:0006915;GO:0007275;GO:0008630;GO:0008630;GO:0008637;GO:0010507;GO:0010507;GO:0016020;GO:0016020;GO:0016020;GO:0016021;GO:0030154;GO:0034097;GO:0034097;GO:0042803;GO:0042981;GO:0043066;GO:0043066;GO:0043066;GO:0044877;GO:0046982;GO:…	K02539	-	T	1CXPF;1B24X;0A36F;13JXK;0VE1B;0DMH1;18XQ7;KOG4728;0US3F	myeloid cell leukemia sequence 1 [Source:MGI Symbol;Acc:MGI:101769]	17210	P97287
ENSMUSG00000095788	56.4477	27.1789	85.7165	3.15379	1.65709	6.49465e-05	0.00413009	3	15436713	15491580	-	2291	Sirpb1a	GO:0003674;GO:0005886;GO:0005886;GO:0016020;GO:0016021;GO:0035556;GO:0050766;GO:0050766;GO:0050870;GO:0003674;GO:0005886;GO:0005886;GO:0016020;GO:0016021;GO:0035556;GO:0050766;GO:0050766;GO:0050870;GO:0003674;GO:0005886;GO:0005886;GO:0035556;GO:0050766;GO:0050766;GO:0050870;	K06551	-	T	0IKYM;1B49F;0UPFN;0VE7W;0DNKM;1CYSK;13NRA;0A0PS;195MW	signal-regulatory protein beta 1A [Source:MGI Symbol;Acc:MGI:2444824]	320832	Q6F5F2
ENSMUSG00000027078	1785.8	1306.53	2265.06	1.73364	0.793808	6.53671e-05	0.00413868	2	84629172	84640679	+	1996	Ube2l6	GO:0000151;GO:0000166;GO:0000209;GO:0005515;GO:0005524;GO:0005634;GO:0006511;GO:0016567;GO:0016740;GO:0018215;GO:0019787;GO:0019941;GO:0031625;GO:0032020;GO:0032020;GO:0042296;GO:0042296;GO:0043130;GO:0061631;GO:0061631;	K04553	EC:2.3.2.23	O	1D38F;0DU0Q;19324;0A73J;1B5M9;0VHXM;0UV75;13QRC;KOG0422	ubiquitin-conjugating enzyme E2L 6 [Source:MGI Symbol;Acc:MGI:1914500]	56791	Q9QZU9
ENSMUSG00000021877	3456.56	2652.29	4260.83	1.60647	0.683894	6.58756e-05	0.00414783	14	26359229	26386239	+	3603	Arf4	GO:0000166;GO:0005154;GO:0005154;GO:0005515;GO:0005515;GO:0005515;GO:0005525;GO:0005525;GO:0005525;GO:0005525;GO:0005525;GO:0005737;GO:0005794;GO:0005794;GO:0005829;GO:0005829;GO:0005886;GO:0005886;GO:0006471;GO:0006471;GO:0006886;GO:0006890;GO:0006890;GO:0007173;GO:0007173;GO:0007420;GO:0007612;GO:0015031;GO:0016020;GO:0016192;GO:0016192;GO:0016477;GO:0016477;GO:0031584;GO:0031584;GO:0032587;GO:…	K07939	-	U	0UFQ9;1B46F;0V5AX;09VP3;KOG0070;0DGXD;12NNP;191J8;1CRMN	ADP-ribosylation factor 4 [Source:MGI Symbol;Acc:MGI:99433]	11843	P61750;Q14BR4
ENSMUSG00000024887	301.955	197.547	406.363	2.05705	1.04057	6.60838e-05	0.00414783	19	31959997	32085611	-	11638	Asah2	GO:0000139;GO:0005509;GO:0005509;GO:0005515;GO:0005576;GO:0005576;GO:0005615;GO:0005615;GO:0005615;GO:0005739;GO:0005739;GO:0005739;GO:0005794;GO:0005794;GO:0005886;GO:0005886;GO:0005886;GO:0005887;GO:0005887;GO:0005887;GO:0005901;GO:0006629;GO:0006665;GO:0006670;GO:0006670;GO:0006672;GO:0006672;GO:0006915;GO:0007346;GO:0007346;GO:0008270;GO:0008270;GO:0010033;GO:0010033;GO:0016020;GO:0016020;GO:…	K12349	EC:3.5.1.23	T	1AZIY;12NAT;1921G;0USXV;0DPK9;0A1YC;KOG2232;0VCGF;1CYJ5	N-acylsphingosine amidohydrolase 2 [Source:MGI Symbol;Acc:MGI:1859310]	54447	Q9JHE3;B9EHG7
ENSMUSG00000013662	1789.27	1417.79	2160.75	1.52403	0.60789	6.68417e-05	0.00417732	19	32649038	32717186	-	5995	Atad1	GO:0000166;GO:0002092;GO:0005515;GO:0005524;GO:0005524;GO:0005739;GO:0005777;GO:0005886;GO:0007612;GO:0007613;GO:0016020;GO:0016787;GO:0016887;GO:0016887;GO:0030054;GO:0045202;GO:0045211;GO:0051967;GO:0098794;GO:0098978;GO:0099149;GO:0000166;GO:0002092;GO:0005515;GO:0005524;GO:0005524;GO:0005739;GO:0005777;GO:0005886;GO:0007612;GO:0007613;GO:0016020;GO:0016787;GO:0016887;GO:0016887;GO:0030054;GO:…	K22530	EC:3.6.1.-	O	0V51H;KOG0737;0DFC7;0UHDF;12NTU;1AT0N;1CQJV;09U2I;18ZDZ	ATPase family, AAA domain containing 1 [Source:MGI Symbol;Acc:MGI:1915229]	67979	Q9D5T0
ENSMUSG00000016206	563.144	425.242	701.047	1.64858	0.721227	6.95708e-05	0.00432921	17	37581111	37585375	+	1438	H2-M3	GO:0001915;GO:0001916;GO:0002237;GO:0002287;GO:0002451;GO:0002476;GO:0002476;GO:0002477;GO:0002481;GO:0002645;GO:0002666;GO:0002729;GO:0002767;GO:0005102;GO:0005615;GO:0005769;GO:0005886;GO:0009897;GO:0009897;GO:0016020;GO:0016021;GO:0016525;GO:0032398;GO:0032729;GO:0032735;GO:0033106;GO:0042130;GO:0042270;GO:0042605;GO:0042610;GO:0042742;GO:0042802;GO:0042803;GO:0045429;GO:0045591;GO:0045953;GO:…	K06751	-	O	14VCH;0DYCB;0WEBN;0UXI1;0KII2;1B75K;1D69V;0B2VZ	histocompatibility 2, M region locus 3 [Source:MGI Symbol;Acc:MGI:95915]	14991	Q31093
ENSMUSG00000038305	50.2689	23.011	77.5268	3.36912	1.75237	7.00971e-05	0.00433607	1	57813321	57987553	+	8041	Spats2l	GO:0005737;GO:0005737;GO:0005737;GO:0005737;GO:0005634;GO:0005654;GO:0005730;GO:0005730;GO:0005737;GO:0005737;GO:0005829;GO:0008150;GO:0032991;GO:0005737;GO:0005737;GO:0005654;GO:0005730;GO:0005737;GO:0005829;GO:0032991;GO:0005634;GO:0005654;GO:0005730;GO:0005730;GO:0005737;GO:0005737;GO:0005829;GO:0008150;GO:0032991;	-	-	S	0IJV6;0DETE;12WEK;18SFD;09TGK;0V4FK;0UMQE;1CPH7;1B3EK	spermatogenesis associated, serine-rich 2-like [Source:MGI Symbol;Acc:MGI:1914448]	67198	Q91WJ7
ENSMUSG00000060675	563.057	357.962	768.152	2.1459	1.10158	7.02791e-05	0.00433607	19	7534824	7565910	+	6396	Plaat3	GO:0004623;GO:0004623;GO:0004623;GO:0004623;GO:0005737;GO:0005737;GO:0005737;GO:0005777;GO:0005778;GO:0005783;GO:0005886;GO:0006629;GO:0006641;GO:0006644;GO:0006644;GO:0007031;GO:0008654;GO:0008970;GO:0008970;GO:0008970;GO:0008970;GO:0009617;GO:0016020;GO:0016020;GO:0016021;GO:0016042;GO:0016410;GO:0016410;GO:0016410;GO:0016740;GO:0016787;GO:0045786;GO:0046485;GO:0048471;GO:0052739;GO:0052740;GO:…	K16817	-	I	0UPYH;0IW0Y;13PS0;0VART;0DMDR;09ZV7;1CW91;1930W;1AZMU	phospholipase A and acyltransferase 3 [Source:MGI Symbol;Acc:MGI:2179715]	225845	Q8R3U1
ENSMUSG00000029780	3846.43	2175.19	5517.68	2.53664	1.34292	7.07569e-05	0.00434705	6	56859385	56900917	-	4250	Nt5c3	GO:0000166;GO:0000287;GO:0005737;GO:0005737;GO:0005737;GO:0005737;GO:0005739;GO:0005783;GO:0005783;GO:0008253;GO:0008253;GO:0008253;GO:0008253;GO:0009117;GO:0016311;GO:0016740;GO:0016787;GO:0046085;GO:0046872;GO:0051607;GO:0000166;GO:0000287;GO:0005737;GO:0005737;GO:0005737;GO:0005737;GO:0005739;GO:0005783;GO:0005783;GO:0008253;GO:0008253;GO:0008253;GO:0008253;GO:0008253;GO:0009117;GO:0016311;GO:…	K24242	-	F	0VAEZ;09ZHN;1CVVH;0DM0N;18WZI;KOG3128;1AW9U;13JZ1;0USM7	5'-nucleotidase, cytosolic III [Source:MGI Symbol;Acc:MGI:1927186]	107569	Q9D020
ENSMUSG00000039456	2436.96	1862.76	3011.16	1.61651	0.69288	7.15894e-05	0.00437964	16	93629009	93672961	+	5430	Morc3	GO:0003723;GO:0005634;GO:0005634;GO:0005654;GO:0005654;GO:0005654;GO:0006468;GO:0006468;GO:0007569;GO:0007569;GO:0008270;GO:0009791;GO:0016363;GO:0016605;GO:0016605;GO:0016605;GO:0018105;GO:0018105;GO:0035064;GO:0035064;GO:0035064;GO:0046872;GO:0048147;GO:0048147;GO:0050821;GO:0050821;GO:0051457;GO:0051457;GO:0003723;GO:0005634;GO:0005634;GO:0005654;GO:0005654;GO:0006468;GO:0007569;GO:0008270;GO:…	K24135	-	D	194PV;0DG5Q;09UW9;1AS8H;0UT2E;1CQV9;KOG1845;12TWS;0V5HG	microrchidia 3 [Source:MGI Symbol;Acc:MGI:2136841]	338467	F7BJB9
ENSMUSG00000074151	4494.85	2343.34	6646.36	2.83628	1.504	7.38989e-05	0.00450193	8	95160984	95253900	+	8493	Nlrc5	GO:0000166;GO:0000978;GO:0000978;GO:0002376;GO:0005524;GO:0005634;GO:0005634;GO:0005634;GO:0005634;GO:0005737;GO:0005737;GO:0005737;GO:0005813;GO:0005813;GO:0005829;GO:0005829;GO:0005829;GO:0009617;GO:0032088;GO:0032088;GO:0032088;GO:0035556;GO:0043549;GO:0043549;GO:0045087;GO:0045087;GO:0045087;GO:0045345;GO:0045345;GO:0045345;GO:0045944;GO:0045944;GO:0045944;GO:0051607;GO:0051607;GO:0060335;GO:…	K22615	-	-	-	NLR family, CARD domain containing 5 [Source:MGI Symbol;Acc:MGI:3612191]	434341	C3VPR6
ENSMUSG00000031712	2786.75	1757.89	3815.61	2.17056	1.11807	7.55964e-05	0.00458607	8	83058261	83129851	-	2261	Il15	GO:0001819;GO:0001866;GO:0005125;GO:0005125;GO:0005125;GO:0005126;GO:0005576;GO:0005576;GO:0005576;GO:0005615;GO:0005615;GO:0005615;GO:0005654;GO:0005737;GO:0005829;GO:0006955;GO:0007260;GO:0008284;GO:0009986;GO:0016607;GO:0030212;GO:0030225;GO:0032740;GO:0032819;GO:0032825;GO:0035723;GO:0035723;GO:0042102;GO:0042102;GO:0042119;GO:0042119;GO:0042119;GO:0042531;GO:0042531;GO:0045062;GO:0045580;GO:…	K05433	-	T	1B5FR;13TC2;0IZ5D;0VHGD;0DTMY;193GD;0UUZ6;0A6N7;1D2ZH	interleukin 15 [Source:MGI Symbol;Acc:MGI:103014]	16168	P48346;Q3U1Z6
ENSMUSG00000049401	3210.46	2578.25	3842.67	1.49042	0.575719	7.90063e-05	0.00475647	2	180231038	180237629	+	2580	Ogfr	GO:0004985;GO:0005634;GO:0005737;GO:0016020;GO:0038003;GO:0038023;GO:0040008;	-	-	K	09WNP;18S2M;0UJC4;1AZGB;12R0H;0DJC0;1CU47;0V8WT;0IH5X	opioid growth factor receptor [Source:MGI Symbol;Acc:MGI:1919325]	72075	Q99PG2
ENSMUSG00000029313	6697.17	5415.12	7979.21	1.4735	0.559251	7.917e-05	0.00475647	5	103840240	104003188	+	9458	Aff1	GO:0005634;GO:0005634;GO:0010468;GO:0010468;GO:0005634;GO:0005634;GO:0008023;GO:0010468;	K15184	-	K	1AUUS;1CPFG;0V6ID;13I7E;09VJ9;0IGJB;0UKUW;18T0P;0DERP	AF4/FMR2 family, member 1 [Source:MGI Symbol;Acc:MGI:1100819]	17355	A3KMF4;E9Q921;Q3UP77
ENSMUSG00000025743	8001.34	6480.75	9521.92	1.46926	0.555091	7.93894e-05	0.00475647	4	130519848	130553630	+	5989	Sdc3	GO:0005515;GO:0005796;GO:0005886;GO:0005886;GO:0005886;GO:0007155;GO:0009986;GO:0016020;GO:0016020;GO:0016020;GO:0016021;GO:0016477;GO:0030334;GO:0030424;GO:0032991;GO:0042802;GO:0042802;GO:0043005;GO:0044393;GO:0016020;GO:0016020;GO:0016021;GO:0016020;GO:0016020;GO:0016021;	K16337	-	T	1AUQM;0VCMI;0URWR;18UCK;0DPE8;1CYC2;0IJZ0;13IB0;0A1RY	syndecan 3 [Source:MGI Symbol;Acc:MGI:1349163]	20970	Q64519
ENSMUSG00000006411	213.274	123.841	302.707	2.44431	1.28943	8.25206e-05	0.00492373	1	171197667	171216166	+	3746	Nectin4	GO:0005886;GO:0005886;GO:0005912;GO:0005912;GO:0005912;GO:0007155;GO:0007155;GO:0007156;GO:0007157;GO:0016020;GO:0016021;GO:0030054;GO:0042802;GO:0046718;GO:0098609;GO:0005886;GO:0005886;GO:0005886;GO:0005912;GO:0005912;GO:0005912;GO:0005912;GO:0007155;GO:0007155;GO:0007156;GO:0007157;GO:0016020;GO:0016021;GO:0030054;GO:0042802;GO:0042802;GO:0046718;GO:0098609;GO:0005886;GO:0005886;GO:0005912;GO:…	K06593	-	T	0UGN2;0IFPI;0VEJS;1AY7Z;13HU4;1D0H8;18X37;0A3R4;0DRBQ	nectin cell adhesion molecule 4 [Source:MGI Symbol;Acc:MGI:1918990]	71740	Q8R007
ENSMUSG00000037944	40.7265	16.9672	64.4858	3.80062	1.92624	8.29281e-05	0.00492777	11	99035022	99045903	-	1978	Ccr7	GO:0001768;GO:0002408;GO:0002408;GO:0002518;GO:0002606;GO:0002649;GO:0002885;GO:0002922;GO:0004930;GO:0004930;GO:0004930;GO:0004950;GO:0005515;GO:0005739;GO:0005739;GO:0005886;GO:0005886;GO:0005886;GO:0005886;GO:0006935;GO:0006935;GO:0006954;GO:0006954;GO:0006955;GO:0006955;GO:0006955;GO:0007165;GO:0007186;GO:0007186;GO:0007204;GO:0007257;GO:0009897;GO:0009897;GO:0009986;GO:0009986;GO:0010759;GO:…	K04182	-	T	13IRZ;0DEJ4;09T7V;1CP8Z;0IMBE;18XTR;0V46V;1AVXW;0UFI1	chemokine (C-C motif) receptor 7 [Source:MGI Symbol;Acc:MGI:103011]	12775	P47774
ENSMUSG00000026339	1357.08	1642.81	1071.36	0.652148	-0.616728	8.4814e-05	0.00501926	1	121358778	121434189	+	11445	Ccdc93	GO:0003674;GO:0005768;GO:0005769;GO:0006893;GO:0006893;GO:0006893;GO:0015031;GO:0032456;GO:0032456;GO:0032456;GO:0043231;GO:0043231;GO:1990126;GO:1990126;GO:1990126;GO:0005769;	-	-	S	0VASP;190IJ;1B0CI;135J3;0UPSX;09ZW3;1CU0H;KOG2701;0DJ8I	coiled-coil domain containing 93 [Source:MGI Symbol;Acc:MGI:1918079]	70829	Q7TQK5
ENSMUSG00000034300	1594.67	1253.3	1936.04	1.54475	0.627373	8.6973e-05	0.0051261	18	34891959	34906813	+	4517	Fam53c	GO:0003674;GO:0005634;GO:0006606;GO:0003674;GO:0005634;GO:0006606;	-	-	O	0UTCE;1B18G;1CZ4Q;0A2GB;0DPNK;0VDC6;0IIF0;13M9B;191NY	family with sequence similarity 53, member C [Source:MGI Symbol;Acc:MGI:1913556]	66306	Q8BXQ8
ENSMUSG00000001052	3488.42	2807.47	4169.37	1.4851	0.570558	8.77664e-05	0.00515193	3	129776408	129855202	-	6020	Sec24b	GO:0000139;GO:0000149;GO:0001843;GO:0002093;GO:0003151;GO:0005515;GO:0005789;GO:0005829;GO:0005829;GO:0005829;GO:0006886;GO:0006888;GO:0006888;GO:0006888;GO:0008270;GO:0008270;GO:0008270;GO:0008270;GO:0012507;GO:0015031;GO:0016020;GO:0021747;GO:0030127;GO:0030127;GO:0030127;GO:0030127;GO:0030134;GO:0030134;GO:0031410;GO:0035909;GO:0060088;GO:0060425;GO:0060463;GO:0060982;GO:0061156;GO:0070971;GO:…	K14007	-	U	09UWU;12NEV;1AU76;0DHBF;0UIPS;1CS1K;KOG1985;18VD7;0V5WN	Sec24 related gene family, member B (S. cerevisiae) [Source:MGI Symbol;Acc:MGI:2139764]	99683	Q80ZX0
ENSMUSG00000018167	2183.11	1672.73	2693.5	1.61025	0.68728	8.94359e-05	0.00522875	11	98249194	98271938	+	3557	Stard3	GO:0005654;GO:0005654;GO:0005737;GO:0005739;GO:0005768;GO:0005768;GO:0005770;GO:0005770;GO:0005789;GO:0005789;GO:0006701;GO:0006869;GO:0008289;GO:0008289;GO:0010008;GO:0015485;GO:0015485;GO:0015485;GO:0015918;GO:0016020;GO:0016021;GO:0030301;GO:0030301;GO:0031902;GO:0031902;GO:0042803;GO:0042803;GO:0043231;GO:0043231;GO:0044232;GO:0044232;GO:0099044;GO:0099044;GO:0120009;GO:0120020;GO:0140284;GO:…	K22291	-	I	1AWH2;1CRRS;12SA3;0V6RZ;KOG3845;09VT5;0UN3M;18YJF;0DH1F	START domain containing 3 [Source:MGI Symbol;Acc:MGI:1929618]	59045	Q61542;Q544C3
ENSMUSG00000030852	84.6185	121.22	48.0168	0.396112	-1.33602	9.03002e-05	0.00524191	7	130179168	130366515	+	15793	Tacc2	GO:0007052;GO:0007052;GO:0007052;GO:0005654;GO:0005737;GO:0005815;GO:0005829;GO:0005856;GO:0005886;GO:0007052;GO:0035257;GO:0005737;GO:0005815;GO:0005856;GO:0007052;GO:0005737;GO:0005815;GO:0005856;GO:0007052;GO:0005737;GO:0005815;GO:0005856;GO:0007052;GO:0005737;GO:0005815;GO:0005856;GO:0007052;GO:0005737;GO:0005815;GO:0005856;GO:0007052;GO:0005737;GO:0005815;GO:0005856;GO:0007052;GO:0000226;GO:…	K14282	-	Z;S	0VBEG;1CW31;190GB;13MIZ;0UPIK;0IIVK;1AZ6F;0A0IB;0DN5C	transforming, acidic coiled-coil containing protein 2 [Source:MGI Symbol;Acc:MGI:1928899]	57752	Q9JJG0;E9Q9Z4;Q3UL40
ENSMUSG00000074570	43.663	19.0338	68.2923	3.58795	1.84316	9.03839e-05	0.00524191	2	172235714	172275677	+	5340	Cass4	GO:0005737;GO:0005737;GO:0005737;GO:0005856;GO:0005886;GO:0005925;GO:0005925;GO:0007155;GO:0007169;GO:0016477;GO:0030054;GO:0030335;GO:0030335;GO:0051897;GO:0061098;GO:0061098;GO:0090527;GO:1900026;GO:1900026;GO:1990782;GO:0005737;GO:0007155;GO:0005737;GO:0005737;GO:0005737;GO:0005856;GO:0005886;GO:0005925;GO:0005925;GO:0007155;GO:0007169;GO:0016477;GO:0030054;GO:0030335;GO:0030335;GO:0051897;GO:…	-	-	Z;T	0IG8H;09T54;0DFZH;13HUX;0UQNK;0VBFI;1B1DW;1CX2X;19142	Cas scaffolding protein family member 4 [Source:MGI Symbol;Acc:MGI:2444482]	320664	Q08EC4
ENSMUSG00000022973	3924.74	2939.98	4909.5	1.66991	0.739772	9.28125e-05	0.00536131	16	90732980	90808196	-	8085	Synj1	GO:0003676;GO:0003723;GO:0004439;GO:0004439;GO:0005737;GO:0005874;GO:0007420;GO:0008022;GO:0014015;GO:0016787;GO:0017124;GO:0030132;GO:0032526;GO:0032991;GO:0034097;GO:0034595;GO:0034595;GO:0042578;GO:0043005;GO:0044877;GO:0046856;GO:0048260;GO:0048488;GO:0052658;GO:0097060;GO:0098688;GO:0098793;GO:1990175;GO:0003676;GO:0003723;GO:0004439;GO:0016787;GO:0034595;GO:0042578;GO:0046856;GO:0048488;GO:…	K20279	EC:3.1.3.36	I;U	12RV2;1CQD8;0V5DA;09UDT;0UKU9;KOG0566;18X84;1AW15;0DFPN	synaptojanin 1 [Source:MGI Symbol;Acc:MGI:1354961]	104015	E9Q7S0
ENSMUSG00000025178	2482	1845.33	3118.66	1.69003	0.757046	9.45769e-05	0.00544048	19	42078909	42110526	+	6692	Pi4k2a	GO:0000166;GO:0002561;GO:0004430;GO:0004430;GO:0004430;GO:0004430;GO:0005524;GO:0005524;GO:0005739;GO:0005768;GO:0005768;GO:0005768;GO:0005794;GO:0005802;GO:0005886;GO:0005886;GO:0005886;GO:0005887;GO:0005887;GO:0006661;GO:0006661;GO:0007030;GO:0007032;GO:0016020;GO:0016301;GO:0016310;GO:0016740;GO:0030054;GO:0030425;GO:0030672;GO:0031083;GO:0031083;GO:0031224;GO:0031224;GO:0031410;GO:0031410;GO:…	K13711	EC:2.7.1.67	T	09UBC;KOG2381;0V5AI;0DNT6;1CXQG;12NNF;0URHG;18SCZ;1AXE4	phosphatidylinositol 4-kinase type 2 alpha [Source:MGI Symbol;Acc:MGI:1934031]	84095	Q2TBE6
ENSMUSG00000066363	89.2192	51.5092	126.929	2.4642	1.30112	9.51708e-05	0.00544048	12	104180803	104187388	+	2290	Serpina3f	GO:0004867;GO:0004867;GO:0005615;GO:0005615;GO:0009617;GO:0010466;GO:0010951;GO:0030414;GO:0034097;GO:0043434;GO:0004867;GO:0004867;GO:0005615;GO:0005615;GO:0009617;GO:0010466;GO:0010951;GO:0030414;GO:0034097;GO:0043434;GO:0004867;GO:0004867;GO:0005615;GO:0005615;GO:0009617;GO:0010466;GO:0010951;GO:0030414;GO:0034097;GO:0043434;	K04525	-	V	0UM4R;1B1G0;09U5H;KOG2392;12R4F;0V54I;1CQ4S;0DFF0;18T05	serine (or cysteine) peptidase inhibitor, clade A, member 3F [Source:MGI Symbol;Acc:MGI:2182838]	238393	Q80X76;Q3UTZ5
ENSMUSG00000046658	69.783	102.221	37.3448	0.365334	-1.45271	9.54695e-05	0.00544048	5	143235452	143255777	-	7526	Zfp316	GO:0006355;GO:0046872;GO:0006355;GO:0046872;	K09228	-	K	0URGK;0DN6V;1AYSR;13MQQ;KOG1721;0A0JK;0VBG0;1CX3H;18ZQ4	zinc finger protein 316 [Source:MGI Symbol;Acc:MGI:1860402]	54201	Q6PGE4;G3XA34
ENSMUSG00000026535	8306.71	4868.68	11744.7	2.4123	1.27041	9.5684e-05	0.00544048	1	173790134	173810310	-	1697	Ifi202b	GO:0002218;GO:0002218;GO:0002376;GO:0003677;GO:0003690;GO:0003690;GO:0005515;GO:0005515;GO:0005634;GO:0005730;GO:0005737;GO:0006954;GO:0009617;GO:0032731;GO:0035458;GO:0035458;GO:0035458;GO:0043154;GO:0045087;GO:0045824;	K12971	-	-	-	interferon activated gene 202B [Source:MGI Symbol;Acc:MGI:1347083]	26388	Q9R002
ENSMUSG00000079316	719.007	554.726	883.288	1.5923	0.671108	9.60954e-05	0.00544253	X	165240249	165262863	-	1749	Rab9	GO:0000139;GO:0000166;GO:0003924;GO:0003924;GO:0003924;GO:0005515;GO:0005515;GO:0005525;GO:0005525;GO:0005525;GO:0005764;GO:0005764;GO:0005768;GO:0005770;GO:0005770;GO:0005770;GO:0005783;GO:0005789;GO:0005794;GO:0005829;GO:0005886;GO:0015031;GO:0016020;GO:0019003;GO:0019003;GO:0030659;GO:0030670;GO:0031410;GO:0032482;GO:0032880;GO:0042147;GO:0042470;GO:0042802;GO:0045335;GO:0045335;GO:0045335;GO:…	K07899	-	U	1CSTN;18TDH;09WT8;0UITK;0V7RC;KOG0394;1AWG5;0DI3B;13J8F	RAB9, member RAS oncogene family [Source:MGI Symbol;Acc:MGI:1890695]	56382	Q9R0M6;Q0PD48
ENSMUSG00000021036	2785.56	2238.99	3332.12	1.48823	0.573593	9.86397e-05	0.00554465	12	87351832	87435129	-	8115	Sptlc2	GO:0003824;GO:0004758;GO:0004758;GO:0004758;GO:0005739;GO:0005783;GO:0005789;GO:0006629;GO:0006665;GO:0006686;GO:0009058;GO:0016020;GO:0016021;GO:0016740;GO:0016740;GO:0016746;GO:0017059;GO:0017059;GO:0017059;GO:0030148;GO:0030148;GO:0030148;GO:0030170;GO:0046511;GO:0046512;GO:0046512;GO:0046513;GO:0046513;GO:0046513;GO:0060612;GO:1904504;GO:1904504;	K00654	EC:2.3.1.50	O	09WBS;0UJH6;0V7A1;0DHM0;12PUB;1CSBF;KOG1357;1AVC4;1946D	serine palmitoyltransferase, long chain base subunit 2 [Source:MGI Symbol;Acc:MGI:108074]	20773	P97363;Q542D6
ENSMUSG00000019818	1252.3	968.004	1536.6	1.58739	0.666659	9.86634e-05	0.00554465	10	41395410	41407044	+	4449	Cd164	GO:0005515;GO:0005764;GO:0005764;GO:0005764;GO:0005764;GO:0005764;GO:0005765;GO:0005768;GO:0005768;GO:0005768;GO:0005768;GO:0005768;GO:0005886;GO:0005886;GO:0005886;GO:0007155;GO:0007155;GO:0007155;GO:0007157;GO:0007157;GO:0007517;GO:0010008;GO:0016020;GO:0016021;GO:0031410;GO:0016020;GO:0016021;GO:0016020;GO:0016021;	K06546	-	W;T;U	0J0NP;1D5H2;0DW7A;0UTZ1;1B4J3;0VIC1;193WW;13VNZ;0A7H3	CD164 antigen [Source:MGI Symbol;Acc:MGI:1859568]	53599	Q9R0L9
ENSMUSG00000034006	494.146	618.673	369.618	0.597437	-0.743141	9.932e-05	0.00556	18	80296507	80335940	+	6105	Slc66a2	GO:0003674;GO:0005768;GO:0005802;GO:0005829;GO:0016020;GO:0016021;GO:0042147;GO:0045332;GO:0016020;GO:0016021;GO:0003674;GO:0005768;GO:0005802;GO:0005829;GO:0016020;GO:0016021;GO:0042147;GO:0045332;GO:0016020;GO:0016021;GO:0003674;GO:0005768;GO:0005802;GO:0005829;GO:0016020;GO:0016021;GO:0042147;GO:0045332;GO:0003674;GO:0005768;GO:0005802;GO:0005829;GO:0016020;GO:0016021;GO:0042147;GO:0045332;GO:…	K23679	-	S;J	KOG2913;0UKNJ;09WXS;1AWE1;13K39;18UAY;0V7W1;0DI8D;1CSYU	solute carrier family 66 member 2 [Source:MGI Symbol;Acc:MGI:1914193]	66943	Q80XM9
ENSMUSG00000030760	848.939	655.749	1042.13	1.58922	0.66832	0.000100848	0.00562385	7	97855596	97970415	-	15324	Acer3	GO:0000139;GO:0005509;GO:0005509;GO:0005783;GO:0005789;GO:0005794;GO:0006629;GO:0006665;GO:0006672;GO:0006954;GO:0008270;GO:0008270;GO:0008284;GO:0016020;GO:0016021;GO:0016021;GO:0016021;GO:0016787;GO:0016811;GO:0017040;GO:0017040;GO:0030173;GO:0030173;GO:0030176;GO:0030176;GO:0030176;GO:0042552;GO:0042552;GO:0043067;GO:0043067;GO:0046512;GO:0046512;GO:0046514;GO:0046514;GO:0046872;GO:0070774;GO:…	K04711	EC:3.5.1.-	I	0A072;190YI;0VB30;13KYE;0DMTC;1CWNQ;KOG2329;1AUGM;0UR0M	alkaline ceramidase 3 [Source:MGI Symbol;Acc:MGI:1913440]	66190	Q9D099
ENSMUSG00000078616	1308.32	724.121	1892.52	2.61355	1.38601	0.000101248	0.00562451	7	104031272	104050044	-	1716	Trim30c	GO:0000209;GO:0005634;GO:0005654;GO:0005737;GO:0005737;GO:0005829;GO:0008270;GO:0010468;GO:0010508;GO:0016567;GO:0019901;GO:0032880;GO:0042803;GO:0043123;GO:0045087;GO:0046596;GO:0046872;GO:0051092;GO:0061630;	-	-	O;K	0B6AK;0WJ0G;13FYK;1DGAS;1BBGY;197FW;0E9FG;0ITFH;0V3TY	tripartite motif-containing 30C [Source:MGI Symbol;Acc:MGI:4821257]	434219	-
ENSMUSG00000039853	658.393	483.298	833.488	1.72459	0.78625	0.000101912	0.0056398	4	46493781	46536141	-	4338	Trim14	GO:0000209;GO:0002376;GO:0005654;GO:0005737;GO:0005737;GO:0005739;GO:0005741;GO:0005829;GO:0008270;GO:0010468;GO:0010508;GO:0016020;GO:0016567;GO:0019901;GO:0031410;GO:0032880;GO:0032897;GO:0042803;GO:0043123;GO:0045087;GO:0045087;GO:0045087;GO:0045087;GO:0045335;GO:0045893;GO:0046596;GO:0046872;GO:0051091;GO:0051092;GO:0051092;GO:0061630;GO:0000209;GO:0002376;GO:0003713;GO:0005654;GO:0005737;GO:…	K12004	-	S	13FTR;0DMM5;0IJ3M;0A01M;1CWGK;1915U;0VAY4;0UQUJ;1B0MK	tripartite motif-containing 14 [Source:MGI Symbol;Acc:MGI:1921985]	74735	Q8BVW3;Q14AR3;Q3V0E0
ENSMUSG00000031402	3853.4	3114.31	4592.49	1.47464	0.560365	0.000105138	0.00578142	X	74153339	74174622	-	5343	Mpp1	GO:0005515;GO:0005515;GO:0005886;GO:0005886;GO:0005886;GO:0016020;GO:0016020;GO:0030863;GO:0032420;GO:0034451;GO:0034451;GO:0042995;GO:0090022;GO:0032420;GO:0032420;GO:0032420;	K21880	-	T	1AUQJ;0V44Z;KOG0609;12PUN;1CXFB;18VSF;0DNHZ;0URPY;09T68	membrane protein, palmitoylated [Source:MGI Symbol;Acc:MGI:105941]	17524	P70290;Q542P4
ENSMUSG00000049969	1154.43	886.067	1422.8	1.60575	0.683245	0.000105269	0.00578142	4	10988662	11007927	-	3039	Plekhf2	GO:0005768;GO:0005783;GO:0015031;GO:0016020;GO:0030133;GO:0030133;GO:0031901;GO:0035091;GO:0046872;GO:0046872;GO:0046872;GO:0046872;	K23858	-	S;T	09XQH;1AZWF;1CTU4;0UJGT;0DJ2E;KOG1729;0V8NA;1900Q;12RNE	pleckstrin homology domain containing, family F (with FYVE domain) member 2 [Source:MGI Symbol;Acc:MGI:1919051]	71801	Q91WB4
ENSMUSG00000032261	6569.16	5064.85	8073.48	1.59402	0.672673	0.000106559	0.00583017	9	83430380	83520854	+	7865	Sh3bgrl2	GO:0005654;GO:0031965;GO:0005515;GO:0005634;GO:0005654;GO:0008150;GO:0017124;GO:0031965;	K23740	-	O	KOG4023;193PZ;0UVF4;13U5R;1B63B;1D3R6;0VIFK;0DUDJ;0A7IZ	SH3 domain binding glutamic acid-rich protein like 2 [Source:MGI Symbol;Acc:MGI:1915350]	212531	Q8BG73
ENSMUSG00000062232	6038.73	3973.07	8104.39	2.03983	1.02845	0.000107097	0.0058376	3	78969823	79193824	-	14051	Rapgef2	GO:0001568;GO:0001764;GO:0005085;GO:0005085;GO:0005085;GO:0005096;GO:0005096;GO:0005096;GO:0005737;GO:0005737;GO:0005768;GO:0005770;GO:0005770;GO:0005829;GO:0005886;GO:0005886;GO:0005911;GO:0005923;GO:0007165;GO:0007186;GO:0007186;GO:0007218;GO:0007218;GO:0007264;GO:0007275;GO:0007399;GO:0008285;GO:0008285;GO:0010976;GO:0010976;GO:0016020;GO:0016020;GO:0016324;GO:0019901;GO:0019933;GO:0019933;GO:…	K08018	-	T	18VZI;1CTRA;0UM0J;0DIZW;1AX4T;0V5Q6;12NW8;09UQI;KOG3542	Rap guanine nucleotide exchange factor (GEF) 2 [Source:MGI Symbol;Acc:MGI:2659071]	76089	E9QNQ4;Q6NXI4
ENSMUSG00000014547	1297.83	1027.28	1568.38	1.52673	0.610448	0.000107733	0.00585029	14	63075127	63198958	+	9185	Wdfy2	GO:0001934;GO:0001934;GO:0005515;GO:0005737;GO:0005768;GO:0005769;GO:0005769;GO:0031982;GO:0031982;GO:0045600;GO:0045600;GO:0046872;GO:0046872;	K23532	-	S	0V5YN;1B0V7;0DG89;09UYS;18WNX;KOG1409;0URX2;12P6B;1CQXQ	WD repeat and FYVE domain containing 2 [Source:MGI Symbol;Acc:MGI:2442811]	268752	Q8BUB4
ENSMUSG00000002227	1392.18	900.236	1884.13	2.09292	1.06552	0.000109887	0.00594498	3	104702152	104725879	-	5607	Mov10	GO:0000932;GO:0003723;GO:0003724;GO:0004386;GO:0005737;GO:0032574;GO:0035194;GO:0000932;GO:0000932;GO:0003723;GO:0003723;GO:0003724;GO:0004386;GO:0005737;GO:0005829;GO:0010526;GO:0032574;GO:0032574;GO:0035194;GO:0035195;GO:0035279;GO:0036464;GO:0051607;GO:0061014;GO:0061158;GO:0000166;GO:0000932;GO:0000932;GO:0003723;GO:0003723;GO:0003723;GO:0003723;GO:0003724;GO:0004386;GO:0004386;GO:0005515;GO:…	K18422	EC:3.6.4.13	A	09XNZ;0UQCC;KOG1804;12QN9;1CW2T;18U0Q;0DM7P;0V8KK;1B2H8	Mov10 RISC complex RNA helicase [Source:MGI Symbol;Acc:MGI:97054]	17454	P23249;Q3UD86
ENSMUSG00000025854	14301.4	16940.6	11662.1	0.688415	-0.53865	0.000111588	0.00601182	5	138740269	138795832	+	6590	Fam20c	GO:0000166;GO:0001501;GO:0004674;GO:0004674;GO:0004674;GO:0004674;GO:0005509;GO:0005524;GO:0005576;GO:0005615;GO:0005615;GO:0005737;GO:0005737;GO:0005737;GO:0005794;GO:0005794;GO:0005794;GO:0006468;GO:0006468;GO:0006468;GO:0006468;GO:0016301;GO:0016310;GO:0016740;GO:0016773;GO:0030145;GO:0030145;GO:0030501;GO:0031214;GO:0031214;GO:0036179;GO:0040036;GO:0045669;GO:0046034;GO:0046034;GO:0046872;GO:…	K21958	EC:2.7.11.1	S;T;P	0UK4F;1AUYQ;1CQS4;09UK5;12R04;18W0P;KOG3829;0V5JE;0DG2M	FAM20C, golgi associated secretory pathway kinase [Source:MGI Symbol;Acc:MGI:2136853]	80752	Q5MJS3
ENSMUSG00000023845	2622.88	2035.49	3210.27	1.57715	0.657321	0.000111952	0.00601182	17	17741672	17845312	-	14144	Lnpep	GO:0004177;GO:0004177;GO:0004177;GO:0005515;GO:0005737;GO:0005886;GO:0005886;GO:0005886;GO:0005887;GO:0006508;GO:0006508;GO:0006508;GO:0007165;GO:0008217;GO:0008233;GO:0008237;GO:0008237;GO:0008270;GO:0008270;GO:0012505;GO:0016020;GO:0016020;GO:0016021;GO:0016787;GO:0030163;GO:0030659;GO:0030659;GO:0042277;GO:0043171;GO:0046872;GO:0048471;GO:0060395;GO:0070006;GO:0120163;	K01257	EC:3.4.11.3	O;E	18UX0;KOG1046;09U40;0V532;1CXJY;1B2NK;0DKZP;12P0W;0UTG4	leucyl/cystinyl aminopeptidase [Source:MGI Symbol;Acc:MGI:2387123]	240028	Q8C129
ENSMUSG00000015846	443.433	554.658	332.207	0.598941	-0.739515	0.000114215	0.00611072	2	27566452	27652969	+	6303	Rxra	GO:0003677;GO:0003700;GO:0005634;GO:0006355;GO:0008270;GO:0043565;GO:0046872;GO:0000122;GO:0000122;GO:0000785;GO:0000785;GO:0000976;GO:0000976;GO:0000977;GO:0000978;GO:0000978;GO:0001162;GO:0001701;GO:0001890;GO:0001893;GO:0001972;GO:0003007;GO:0003677;GO:0003677;GO:0003677;GO:0003690;GO:0003700;GO:0003700;GO:0003707;GO:0004879;GO:0004879;GO:0004879;GO:0005515;GO:0005515;GO:0005515;GO:0005634;GO:…	K08524	-	K	18TMV;1B0V8;0V4Q5;0UN7V;0DF12;09TQV;1CPQX;13HS8;KOG3575	retinoid X receptor alpha [Source:MGI Symbol;Acc:MGI:98214]	20181	P28700;A2AJP1;Q3UMU4
ENSMUSG00000043415	217.058	151.003	283.113	1.87488	0.906799	0.000116645	0.00621779	2	19662563	19665394	+	2832	Otud1	GO:0004843;GO:0004843;GO:0004843;GO:0004843;GO:0005575;GO:0006508;GO:0008233;GO:0008234;GO:0016579;GO:0016787;GO:0018215;GO:0070536;GO:0070536;GO:0070536;GO:0070536;	K13716	EC:3.4.19.12	O;T	0INQC;1BAT3;0V2V2;0WG2R;0B3NU;0E7TP;1DETH;13BT7	OTU domain containing 1 [Source:MGI Symbol;Acc:MGI:1918448]	71198	Q9CUB6
ENSMUSG00000031613	529.385	402.318	656.453	1.63168	0.706357	0.000119117	0.00632631	8	56747620	56774078	+	1683	Hpgd	GO:0001822;GO:0004957;GO:0004957;GO:0004957;GO:0005615;GO:0005615;GO:0005654;GO:0005654;GO:0005737;GO:0005737;GO:0005737;GO:0005737;GO:0005829;GO:0005829;GO:0006629;GO:0006631;GO:0006693;GO:0006693;GO:0006693;GO:0006693;GO:0006693;GO:0007179;GO:0007179;GO:0007179;GO:0007565;GO:0007565;GO:0007565;GO:0007565;GO:0007565;GO:0007567;GO:0007567;GO:0007567;GO:0016323;GO:0016404;GO:0016404;GO:0016404;GO:…	K00069	EC:1.1.1.141	Q	0DFUT;12UEP;1CRJ1;1AT9B;0UIRY;0V6JG;192XJ;09VKA;KOG4169	hydroxyprostaglandin dehydrogenase 15 (NAD) [Source:MGI Symbol;Acc:MGI:108085]	15446	Q8VCC1
ENSMUSG00000026483	2818.67	2272.21	3365.13	1.48099	0.566566	0.000120361	0.006369	1	151446937	151597690	+	7380	Niban1	GO:0001933;GO:0001934;GO:0003674;GO:0003674;GO:0005737;GO:0005737;GO:0005737;GO:0005829;GO:0005829;GO:0005886;GO:0005886;GO:0006417;GO:0016020;GO:0034976;GO:0045727;	-	-	O;K	0IFR1;0UHQK;190MQ;1AVID;0DHAS;09X6Z;0V85K;13HCM;1CS0W	niban apoptosis regulator 1 [Source:MGI Symbol;Acc:MGI:2137237]	63913	Q3UW53
ENSMUSG00000043964	237.927	308.087	167.768	0.544549	-0.876867	0.000123063	0.00647094	7	127368987	127374322	+	2141	Orai3	GO:0016020;GO:0016021;GO:0016021;GO:0002115;GO:0002115;GO:0005886;GO:0015279;GO:0016020;GO:0016020;GO:0016020;GO:0016021;GO:0016021;GO:0070588;GO:0016020;GO:0016021;GO:0016021;	K16058	-	A	0UFQ2;0DHD6;09W46;0V72H;1AVRM;18WQH;KOG4298;12RK3;1CS3F	ORAI calcium release-activated calcium modulator 3 [Source:MGI Symbol;Acc:MGI:3039586]	269999	Q6P8G8;A3KCG3
ENSMUSG00000053477	1894.76	1471.07	2318.46	1.57604	0.656303	0.00012318	0.00647094	18	69476427	69822150	+	27382	Tcf4	GO:0046983;GO:0000122;GO:0000785;GO:0000785;GO:0000978;GO:0000978;GO:0000978;GO:0000981;GO:0000981;GO:0001093;GO:0001228;GO:0003677;GO:0003677;GO:0003682;GO:0003690;GO:0003700;GO:0003714;GO:0005515;GO:0005515;GO:0005515;GO:0005634;GO:0005634;GO:0005667;GO:0005667;GO:0005667;GO:0006355;GO:0006357;GO:0007275;GO:0007399;GO:0008013;GO:0008022;GO:0010629;GO:0016525;GO:0030154;GO:0042118;GO:0042802;GO:…	K15603	-	K	192I3;KOG3910;0UGDU;1CPX0;09W56;0DF7F;0V4W4;1B1VF;12RFK	transcription factor 4 [Source:MGI Symbol;Acc:MGI:98506]	21413	Q60722;Q8BPX7
ENSMUSG00000020737	2272.91	1828.16	2717.66	1.48655	0.571973	0.00012784	0.00669155	11	115388179	115405213	-	2149	Jpt1	GO:0003674;GO:0005634;GO:0005654;GO:0005730;GO:0005737;GO:0008150;GO:0031965;	-	-	O	193E1;1B4KF;13XXH;0DU30;0UUAH;0VI15;1D32Q;0J50B;0A6TD	Jupiter microtubule associated homolog 1 [Source:MGI Symbol;Acc:MGI:1096361]	15374	P97825
ENSMUSG00000054509	1075.84	826.291	1325.38	1.60402	0.681689	0.000133882	0.00697118	14	56813076	56897251	+	6534	Parp4	GO:0003950;GO:0003950;GO:0005634;GO:0005634;GO:0005737;GO:0005737;GO:0005819;GO:0005829;GO:0005876;GO:0006464;GO:0006471;GO:0006954;GO:0008219;GO:0016740;GO:0016757;GO:0019899;GO:0051972;GO:0140289;GO:0140289;GO:1990404;GO:1990404;	K10798	EC:2.4.2.30	O;K;L	1CYR4;0UT34;1B3CQ;0DPRX;09VK1;12SBI;18VTD;KOG1037;0VD66	poly (ADP-ribose) polymerase family, member 4 [Source:MGI Symbol;Acc:MGI:2685589]	328417	E9PYK3
ENSMUSG00000062488	1082.48	565.072	1599.89	2.8313	1.50146	0.000134501	0.00697118	19	34585370	34590801	+	2000	Ifit3b	GO:0003723;GO:0005737;GO:0005739;GO:0005829;GO:0005829;GO:0035457;GO:0042802;GO:0051607;	-	-	T;P	1AVY2;0UPM4;18T62;1CVFR;12U68;0DKMA;KOG1124;09Z5A;0VA2H	interferon-induced protein with tetratricopeptide repeats 3B [Source:MGI Symbol;Acc:MGI:3698419]	667370	E9PV48;Q8BPC3
ENSMUSG00000078485	1049.86	768.528	1331.19	1.73212	0.792543	0.000134625	0.00697118	4	156305913	156319314	-	8328	Plekhn1	GO:0001666;GO:0001666;GO:0001666;GO:0001786;GO:0001786;GO:0001786;GO:0005515;GO:0005739;GO:0005739;GO:0005856;GO:0005856;GO:0005856;GO:0005886;GO:0016020;GO:0031966;GO:0031966;GO:0031966;GO:0043065;GO:0043065;GO:0043065;GO:0043065;GO:0061158;GO:0061158;GO:0061158;GO:0070300;GO:0070300;GO:0070300;GO:1901612;GO:1901612;GO:1901612;GO:1901612;GO:1901981;GO:1901981;GO:1901981;GO:0043065;GO:1901612;GO:…	K10454	-	Z;T	09UZV;0UP36;1CVQQ;1B2G1;0DKVJ;0V8CT;12QHR;KOG4441;18XKP;0US1Q;0DPF3;19556;1CYD7;1B2AM;0VF95;0A4E8;12TBH;0IJJ0	pleckstrin homology domain containing, family N member 1 [Source:MGI Symbol;Acc:MGI:2387630]	231003	Q6TDP3;B2RTE7
ENSMUSG00000072889	2130.65	1292.05	2969.26	2.29811	1.20045	0.000138399	0.00711712	5	72670644	72717027	-	8307	Nfxl1	GO:0000977;GO:0000981;GO:0003700;GO:0005634;GO:0005634;GO:0006355;GO:0006355;GO:0006357;GO:0008270;GO:0016020;GO:0016021;GO:0046872;GO:0000977;GO:0000981;GO:0003700;GO:0005634;GO:0005634;GO:0006355;GO:0006355;GO:0006357;GO:0008270;GO:0046872;GO:0000977;GO:0000981;GO:0003700;GO:0005634;GO:0005634;GO:0006355;GO:0006355;GO:0006357;GO:0008270;GO:0046872;	K15683	-	K	0V7PE;1CSRB;12QQK;0DI0N;KOG1952;09WQY;0UUM8;18Y9H;1AUR9	nuclear transcription factor, X-box binding-like 1 [Source:MGI Symbol;Acc:MGI:1923646]	100978	-
ENSMUSG00000029330	430.094	322.951	537.236	1.66352	0.734239	0.000138425	0.00711712	5	101912996	101971724	+	3939	Cds1	GO:0004605;GO:0004605;GO:0004605;GO:0004605;GO:0004605;GO:0005783;GO:0005783;GO:0005783;GO:0005789;GO:0005789;GO:0005789;GO:0005789;GO:0006629;GO:0006661;GO:0006661;GO:0006661;GO:0008654;GO:0016020;GO:0016020;GO:0016021;GO:0016021;GO:0016021;GO:0016024;GO:0016024;GO:0016024;GO:0016740;GO:0016772;GO:0016779;GO:0045600;GO:0140042;GO:0140042;GO:0140042;	K00981	EC:2.7.7.41	I	KOG1440;18VGR;0DG4M;0UHRW;12PGK;09UYD;1CQU6;0V5YB;1ARPJ	CDP-diacylglycerol synthase 1 [Source:MGI Symbol;Acc:MGI:1921846]	74596	P98191
ENSMUSG00000024601	704.153	535.363	872.943	1.63056	0.705369	0.000139322	0.00713792	18	58792538	58813440	+	3377	Isoc1	GO:0003674;GO:0005737;GO:0005777;GO:0005777;GO:0008150;	-	-	Q	1CRVM;18WY9;1AUPT;KOG4044;13RCQ;0V6VM;0UJ6Z;09VX6;0DH5B	isochorismatase domain containing 1 [Source:MGI Symbol;Acc:MGI:1913557]	66307	Q91V64
ENSMUSG00000022867	7967.94	6182.09	9753.79	1.57775	0.657867	0.000139967	0.0071457	16	76810594	76913668	+	5411	Usp25	GO:0004843;GO:0004843;GO:0005783;GO:0005829;GO:0006508;GO:0006511;GO:0008233;GO:0008234;GO:0016579;GO:0016579;GO:0016787;GO:0018215;GO:0031625;GO:0032183;GO:0051117;GO:0070536;GO:0071108;GO:1904293;GO:0000502;GO:0004197;GO:0004843;GO:0004843;GO:0004843;GO:0004843;GO:0005634;GO:0005634;GO:0005737;GO:0005783;GO:0005829;GO:0005829;GO:0006508;GO:0006511;GO:0006511;GO:0008233;GO:0008234;GO:0016579;GO:…	K11849	EC:3.4.19.12	O	KOG1863;0UP7E;1CQUB;1AZ8I;0DG4S;0V5UX;12NZ2;194WI;09UVA	ubiquitin specific peptidase 25 [Source:MGI Symbol;Acc:MGI:1353655]	30940	P57080
ENSMUSG00000023915	142.566	192.059	93.0737	0.48461	-1.0451	0.000142076	0.00722794	17	43327446	43400080	+	4109	Tnfrsf21	GO:0001783;GO:0002250;GO:0002250;GO:0002376;GO:0005737;GO:0005737;GO:0005886;GO:0005887;GO:0005887;GO:0005887;GO:0006915;GO:0006915;GO:0006915;GO:0006959;GO:0006959;GO:0007165;GO:0007413;GO:0007413;GO:0016020;GO:0016021;GO:0030424;GO:0030889;GO:0030889;GO:0031226;GO:0031642;GO:0031642;GO:0031642;GO:0032693;GO:0032696;GO:0032714;GO:0042130;GO:0042130;GO:0042552;GO:0048713;GO:0050852;GO:0051402;GO:…	K05157	-	T	09TMQ;0IHQ6;12U3D;1CQK8;0V5KN;1ATNG;18W9X;0DFWV;0UHEA	tumor necrosis factor receptor superfamily, member 21 [Source:MGI Symbol;Acc:MGI:2151075]	94185	Q9EPU5
ENSMUSG00000018459	2288.4	1776.34	2800.46	1.57653	0.656752	0.000143544	0.00727709	2	165246948	165315150	-	5215	Slc13a3	GO:0005310;GO:0005310;GO:0005343;GO:0005886;GO:0005886;GO:0005886;GO:0006811;GO:0006814;GO:0006835;GO:0006835;GO:0015137;GO:0015137;GO:0015139;GO:0015139;GO:0015141;GO:0015141;GO:0015141;GO:0015141;GO:0015183;GO:0015293;GO:0015362;GO:0015742;GO:0015744;GO:0015746;GO:0015746;GO:0015810;GO:0016020;GO:0016020;GO:0016020;GO:0016021;GO:0016021;GO:0016021;GO:0016323;GO:0016323;GO:0017153;GO:0017153;GO:…	K14445	-	P	0V512;195A0;12Q3H;0DFBW;0USYH;1CU0A;09U24;1AYJI;KOG1281	solute carrier family 13 (sodium-dependent dicarboxylate transporter), member 3 [Source:MGI Symbol;Acc:MGI:2149635]	114644	Q91Y63;Q3UUJ6
ENSMUSG00000040483	2659.49	1928.23	3390.76	1.75849	0.814337	0.000147616	0.00745743	11	72192455	72204559	+	4689	Xaf1	GO:0006915;GO:0005634;GO:0005634;GO:0005654;GO:0005737;GO:0005739;GO:0005739;GO:0006915;GO:0006915;GO:0031333;GO:0035456;GO:0046872;GO:0005634;GO:0005634;GO:0005654;GO:0005737;GO:0005739;GO:0005739;GO:0006915;GO:0006915;GO:0031333;GO:0035456;GO:0046872;GO:0006915;	-	-	T	13IV2;1CY4E;0IK96;0VBJP;0USIR;0DP6F;0A1ID;1B2PI;193Q8	XIAP associated factor 1 [Source:MGI Symbol;Acc:MGI:3772572]	327959	Q5NBU8
ENSMUSG00000048120	620.072	478.4	761.745	1.59228	0.671092	0.000149009	0.00750166	19	40600810	40730046	+	5580	Entpd1	GO:0000166;GO:0005524;GO:0016020;GO:0016021;GO:0016787;GO:0016787;GO:0000166;GO:0004382;GO:0005524;GO:0005604;GO:0005615;GO:0005886;GO:0007186;GO:0008021;GO:0009134;GO:0009181;GO:0009897;GO:0009986;GO:0014069;GO:0016020;GO:0016020;GO:0016021;GO:0016323;GO:0016787;GO:0016787;GO:0016887;GO:0017110;GO:0017110;GO:0017111;GO:0030168;GO:0033602;GO:0042802;GO:0043005;GO:0043025;GO:0043262;GO:0045134;GO:…	K01510	EC:3.6.1.5	F	12QP6;1ATDE;0DJ2A;0V6I5;18TCY;09VIZ;0UMRA;1CTU0;KOG1386	ectonucleoside triphosphate diphosphohydrolase 1 [Source:MGI Symbol;Acc:MGI:102805]	12495	P55772;Q544U5
ENSMUSG00000027322	3041.35	1960.58	4122.12	2.1025	1.07211	0.000150503	0.00751302	2	130911140	130928685	-	7143	Siglec1	GO:0016021;GO:0016021;GO:0016021;	K06548	-	T	0E68C;1BABG;0V1K7;0WDD8;14U3A;1DD7J;196XE;0KDW5;0B0VP	sialic acid binding Ig-like lectin 1, sialoadhesin [Source:MGI Symbol;Acc:MGI:99668]	20612	Q62230;G3X8X6
ENSMUSG00000025058	606.344	400.945	811.743	2.02457	1.01762	0.00015096	0.00751302	X	84913960	84935105	+	3754	Tasl	GO:0002376;GO:0003674;GO:0005634;GO:0005737;GO:0005764;GO:0005765;GO:0005768;GO:0010008;GO:0016020;GO:0034121;GO:0034157;GO:0034157;GO:0034157;GO:0034161;GO:0034161;GO:0034161;GO:0035751;GO:0035751;GO:0035751;GO:0035751;GO:0036020;GO:0036020;GO:0036020;GO:0045087;GO:0045089;GO:0045089;GO:0045089;	-	-	S	0IF09;1CPJ5;0V4HR;0UN0H;13NA4;1B2ST;18WN3;0DEVE;09TIT	TLR adaptor interacting with endolysosomal SLC15A4 [Source:MGI Symbol;Acc:MGI:1918648]	71398	Q9D3J9;Q08EG0
ENSMUSG00000028037	10505.4	6114.97	14895.9	2.43597	1.28449	0.00015122	0.00751302	3	151436559	151455597	-	6129	Ifi44	GO:0003674;GO:0005737;GO:0006955;GO:0009617;	-	-	S	0V4Y2;0DF95;12T23;0UK1C;09TZ5;0IDX3;191K2;1CPYR;1AVXU	interferon-induced protein 44 [Source:MGI Symbol;Acc:MGI:2443016]	99899	Q8BV66
ENSMUSG00000021196	4954.66	4035.99	5873.33	1.45524	0.541256	0.000151819	0.00751302	13	6629804	6698813	-	13401	Pfkp	GO:0000166;GO:0003824;GO:0003872;GO:0003872;GO:0003872;GO:0003872;GO:0005524;GO:0005524;GO:0005524;GO:0005524;GO:0005737;GO:0005737;GO:0005737;GO:0005737;GO:0005829;GO:0005945;GO:0005945;GO:0006002;GO:0006002;GO:0006002;GO:0006096;GO:0006096;GO:0006096;GO:0008152;GO:0016020;GO:0016208;GO:0016301;GO:0016310;GO:0016740;GO:0030388;GO:0030388;GO:0042802;GO:0042802;GO:0044877;GO:0044877;GO:0046872;GO:…	K00850	EC:2.7.1.11	G	09U07;0DFA0;KOG2440;1ASPB;0V4Z1;0UH05;12PSE;18WW7;1CPZP	phosphofructokinase, platelet [Source:MGI Symbol;Acc:MGI:1891833]	56421	Q9WUA3;Q8C605
ENSMUSG00000029502	2211.19	1641.26	2781.12	1.69451	0.760864	0.000151874	0.00751302	5	110324567	110374336	+	12671	Golga3	GO:0007283;GO:0090498;GO:0005654;GO:0005730;GO:0005794;GO:0005829;GO:0007283;GO:0017119;GO:0090498;GO:0090498;	-	-	Z;S;U	1CU7V;0V664;09Y2E;1ATES;0DJFB;0IFW4;1911E;13KIB;0USRP	golgi autoantigen, golgin subfamily a, 3 [Source:MGI Symbol;Acc:MGI:96958]	269682	P55937;A0A0R4J1H6
ENSMUSG00000090523	464.774	221.129	708.419	3.20364	1.67971	0.000152344	0.00751302	18	32661375	32693087	-	2331	Gypc	GO:0005886;GO:0005886;GO:0016020;GO:0016020;GO:0016020;GO:0016021;GO:0030863;GO:0030863;GO:0016020;GO:0016021;GO:0016020;GO:0016021;	K06576	-	U	0J2G2;0DVHW;1D4UI;193Z7;0VKBT;1B6PV;13W8U;0UWC9;0A9EZ	glycophorin C [Source:MGI Symbol;Acc:MGI:1098566]	71683	Q78HU7
ENSMUSG00000027522	1423.45	1135.92	1710.98	1.50625	0.590962	0.000153476	0.00752845	2	173918101	173941564	+	3962	Stx16	GO:0016020;GO:0016192;GO:0006886;GO:0016020;GO:0016192;GO:0031201;GO:0000139;GO:0000149;GO:0005484;GO:0005484;GO:0005484;GO:0005515;GO:0005515;GO:0005737;GO:0005783;GO:0005794;GO:0005794;GO:0005802;GO:0005829;GO:0006886;GO:0006886;GO:0006906;GO:0012505;GO:0015031;GO:0016020;GO:0016020;GO:0016020;GO:0016021;GO:0016021;GO:0016192;GO:0019905;GO:0030285;GO:0031201;GO:0031201;GO:0031201;GO:0031985;GO:…	K08489	-	U	09YDB;KOG0809;18UXD;0UICJ;12RX9;1CUKD;1ATWV;0V9AY;0DJT7	syntaxin 16 [Source:MGI Symbol;Acc:MGI:1923396]	228960	Q8BVI5
ENSMUSG00000047735	12577.6	8884.79	16270.3	1.83126	0.872833	0.000153695	0.00752845	6	3372257	3399572	-	5427	Samd9l	-	K23949	-	S	13G0G;0V4EM;0UNY9;1AYG8;09TFI;18UK2;1CPGA;0IETT;0DESJ	sterile alpha motif domain containing 9-like [Source:MGI Symbol;Acc:MGI:1343184]	209086	E9PX59;Q8BZG4
ENSMUSG00000004040	3927.64	2534.6	5320.67	2.09921	1.06985	0.000157092	0.00766893	11	100775924	100830366	-	9527	Stat3	GO:0000785;GO:0000785;GO:0000976;GO:0000978;GO:0000978;GO:0000981;GO:0000981;GO:0001103;GO:0001228;GO:0001659;GO:0001754;GO:0003677;GO:0003677;GO:0003677;GO:0003700;GO:0003700;GO:0003700;GO:0004879;GO:0005515;GO:0005515;GO:0005515;GO:0005634;GO:0005634;GO:0005634;GO:0005634;GO:0005654;GO:0005654;GO:0005667;GO:0005737;GO:0005737;GO:0005737;GO:0005737;GO:0005739;GO:0005743;GO:0005829;GO:0005829;GO:…	K04692	-	K	1CT96;09X75;13KVM;KOG3667;0DIIK;0V85R;0UN5S;18W5F;1B3J0	signal transducer and activator of transcription 3 [Source:MGI Symbol;Acc:MGI:103038]	20848	P42227;Q3ULI4
ENSMUSG00000096727	932.271	734.247	1130.3	1.53939	0.622362	0.0001595	0.00774219	17	34400961	34406738	-	3660	Psmb9	GO:0000502;GO:0002376;GO:0002376;GO:0004175;GO:0004298;GO:0004298;GO:0005634;GO:0005737;GO:0005829;GO:0005839;GO:0006508;GO:0008233;GO:0016787;GO:0051603;GO:2000116;GO:0002376;GO:0004175;GO:0005839;GO:0006508;GO:0000502;GO:0002376;GO:0004175;GO:0004298;GO:0005634;GO:0005737;GO:0005839;GO:0051603;GO:0000502;GO:0002376;GO:0004175;GO:0004298;GO:0005634;GO:0005737;GO:0005839;GO:0051603;	K02741	EC:3.4.25.1	O	KOG0174;1CRNE;0DGY5;12QEH;0UQ7J;1ARJE;18U8E;0VA28;09Z52	proteasome (prosome, macropain) subunit, beta type 9 (large multifunctional peptidase 2) [Source:MGI Symbol;Acc:MGI:1346526]	16912	P28076;A0A0R4J256
ENSMUSG00000028793	4549.28	3409.73	5688.84	1.66841	0.738477	0.00015966	0.00774219	4	128952064	128979679	+	2872	Rnf19b	GO:0004842;GO:0016020;GO:0016021;GO:0016567;GO:0016740;GO:0046872;GO:0000151;GO:0000209;GO:0002250;GO:0002376;GO:0004842;GO:0005737;GO:0005783;GO:0005783;GO:0005783;GO:0005789;GO:0005829;GO:0005829;GO:0006511;GO:0016020;GO:0016021;GO:0016567;GO:0016567;GO:0016740;GO:0031624;GO:0032436;GO:0042267;GO:0043130;GO:0043130;GO:0043130;GO:0044194;GO:0044194;GO:0046872;GO:0051865;GO:0051865;GO:0051865;GO:…	K11973	EC:2.3.2.31	O	18XVN;12T1W;KOG1815;09U0D;0DFA5;0UHNW;0V4Z6;1AURC;1CPZV	ring finger protein 19B [Source:MGI Symbol;Acc:MGI:1922484]	75234	-
ENSMUSG00000068245	2836.1	1514.86	4157.33	2.74437	1.45648	0.000160295	0.00774706	14	59584856	59602919	-	4498	Phf11d	GO:0003674;GO:0005634;GO:0005634;GO:0005654;GO:0008150;GO:0031965;GO:0046872;GO:0003674;GO:0005634;GO:0005634;GO:0005654;GO:0008150;GO:0031965;GO:0046872;GO:0003674;GO:0005634;GO:0005634;GO:0005654;GO:0008150;GO:0031965;GO:0046872;	-	-	K	1CVYF;0UQ6M;0VAGS;18TG3;0DM3F;13P62;09ZJZ;1B470;KOG1084	PHD finger protein 11D [Source:MGI Symbol;Acc:MGI:1277133]	219132	A6H5X4;B4XVQ0
ENSMUSG00000028124	7612.43	9449.42	5775.44	0.611195	-0.710294	0.000161012	0.00775587	3	122039206	122064381	+	6291	Gclm	GO:0004357;GO:0004357;GO:0004357;GO:0005515;GO:0006534;GO:0006536;GO:0006536;GO:0006536;GO:0006749;GO:0006750;GO:0006750;GO:0006750;GO:0006750;GO:0006750;GO:0006750;GO:0006979;GO:0006979;GO:0006979;GO:0006979;GO:0007568;GO:0007584;GO:0008637;GO:0014823;GO:0017109;GO:0017109;GO:0017109;GO:0017109;GO:0030234;GO:0035226;GO:0035226;GO:0035226;GO:0035226;GO:0035226;GO:0035229;GO:0035229;GO:0035229;GO:…	K11205	-	E	1CPBY;18UUC;0V49X;KOG3023;12QN5;0DEN3;09TAS;1B0IP;0UTP7	glutamate-cysteine ligase, modifier subunit [Source:MGI Symbol;Acc:MGI:104995]	14630	O09172;Q4FJZ6
ENSMUSG00000009185	13.8685	2.06661	25.6705	12.4216	3.63478	0.000162396	0.00779663	11	82006011	82007625	+	511	Ccl8	GO:0002548;GO:0005125;GO:0005576;GO:0005576;GO:0005615;GO:0005615;GO:0005615;GO:0006935;GO:0006954;GO:0006954;GO:0006955;GO:0007165;GO:0007186;GO:0008009;GO:0008009;GO:0008201;GO:0030593;GO:0043547;GO:0045663;GO:0048020;GO:0048245;GO:0048247;GO:0060326;GO:0070098;GO:0070374;GO:0071346;GO:0071347;GO:0071356;GO:1901741;	K16596	-	-	-	chemokine (C-C motif) ligand 8 [Source:MGI Symbol;Acc:MGI:101878]	20307	Q9Z121;Q149U7
ENSMUSG00000056501	950.893	1593.93	307.852	0.19314	-2.37228	0.000164972	0.00789417	2	167530835	167532338	+	1504	Cebpb	GO:0000122;GO:0000122;GO:0000122;GO:0000779;GO:0000785;GO:0000785;GO:0000976;GO:0000977;GO:0000977;GO:0000978;GO:0000978;GO:0000979;GO:0000981;GO:0000981;GO:0000981;GO:0000981;GO:0001227;GO:0001227;GO:0001227;GO:0001228;GO:0001228;GO:0001541;GO:0001889;GO:0001892;GO:0003677;GO:0003677;GO:0003677;GO:0003682;GO:0003682;GO:0003700;GO:0005515;GO:0005515;GO:0005515;GO:0005515;GO:0005634;GO:0005634;GO:…	K10048	-	K	0A1V2;19685;1AW68;0VCQQ;1CSWS;12U30;0USUY;0DPH8;KOG3119	CCAAT/enhancer binding protein (C/EBP), beta [Source:MGI Symbol;Acc:MGI:88373]	12608	P28033;Q3UPN9
ENSMUSG00000026896	19812.3	12229.7	27394.8	2.24003	1.16352	0.000166131	0.00792346	2	62426142	62476599	-	8165	Ifih1	GO:0000166;GO:0002376;GO:0003677;GO:0003723;GO:0003724;GO:0003725;GO:0003725;GO:0003725;GO:0003725;GO:0003727;GO:0003727;GO:0003727;GO:0003727;GO:0004386;GO:0005515;GO:0005515;GO:0005524;GO:0005524;GO:0005634;GO:0005737;GO:0005737;GO:0008270;GO:0008270;GO:0008270;GO:0008270;GO:0009615;GO:0009615;GO:0016787;GO:0016787;GO:0016925;GO:0016925;GO:0016925;GO:0032727;GO:0032727;GO:0032727;GO:0032728;GO:…	K12647	EC:3.6.4.13	A	1AYAQ;0V4TZ;190AY;KOG0354;1CTWW;0DF53;12NQ7;09TUS;0UQBF	interferon induced with helicase C domain 1 [Source:MGI Symbol;Acc:MGI:1918836]	71586	Q8R5F7;Q3TGP5;D2CGM4
ENSMUSG00000018931	210.415	273.89	146.94	0.536491	-0.898375	0.000167311	0.00795358	11	60793072	60805576	-	4247	Natd1	GO:0005575;	K06975	-	S	1B5ZF;0VJGC;1D4E2;0UVPN;0IZHM;13SRI;0A7U9;0DUID;193N3	N-acetyltransferase domain containing 1 [Source:MGI Symbol;Acc:MGI:1344388]	24083	Q9DBW3
ENSMUSG00000032344	495.368	373.4	617.335	1.65328	0.72533	0.000172917	0.00819322	9	78337808	78350519	-	4126	Cgas	GO:0000166;GO:0002218;GO:0002218;GO:0002218;GO:0002218;GO:0002230;GO:0002230;GO:0002230;GO:0002230;GO:0002376;GO:0002637;GO:0003677;GO:0003677;GO:0003677;GO:0003682;GO:0003682;GO:0003682;GO:0003682;GO:0003690;GO:0003690;GO:0003690;GO:0003690;GO:0005515;GO:0005524;GO:0005525;GO:0005546;GO:0005546;GO:0005546;GO:0005634;GO:0005634;GO:0005634;GO:0005634;GO:0005737;GO:0005829;GO:0005829;GO:0005829;GO:…	K17834	EC:2.7.7.86	F;T	1D0CT;1AUUI;0DR7D;13J1Z;0IE27;1945C;0A3IW;0VD69;0UQ0U	cyclic GMP-AMP synthase [Source:MGI Symbol;Acc:MGI:2442261]	214763	Q8C6L5;Q8BSY1
ENSMUSG00000029552	1614.23	1295.3	1933.15	1.49244	0.577673	0.000175188	0.00827377	6	17065148	17105827	+	6835	Tes	GO:0005737;GO:0005925;GO:0008270;GO:0030054;GO:0042127;GO:0046872;GO:0008270;GO:0042127;GO:0005737;GO:0005925;GO:0008270;GO:0030054;GO:0042127;GO:0046872;	K24270	-	Z;T	13BM2;0E7R4;1DER5;1972B;0B3JB;1BARR;0WFYU;0V2TC;0INGJ	testin LIM domain protein [Source:MGI Symbol;Acc:MGI:105081]	21753	Q921W7
ENSMUSG00000029771	4359.91	3555.85	5163.96	1.45224	0.538284	0.000176642	0.00831537	6	29526624	29541870	+	2905	Irf5	GO:0000976;GO:0000978;GO:0000981;GO:0000981;GO:0000981;GO:0001228;GO:0002376;GO:0002376;GO:0003677;GO:0003700;GO:0005515;GO:0005634;GO:0005634;GO:0005634;GO:0005737;GO:0005737;GO:0006355;GO:0006357;GO:0006357;GO:0006954;GO:0019221;GO:0019221;GO:0019221;GO:0019901;GO:0019901;GO:0032481;GO:0032481;GO:0032494;GO:0032495;GO:0042802;GO:0043065;GO:0043565;GO:0045087;GO:0045944;GO:0045944;GO:0051607;GO:…	K09446	-	K	12QME;09V91;1AUPX;0DGHD;1CR73;0UPE7;0V68E;0IFCV;18U9Y	interferon regulatory factor 5 [Source:MGI Symbol;Acc:MGI:1350924]	27056	P56477;Q3U169
ENSMUSG00000018654	7964.69	5857.07	10072.3	1.71968	0.782144	0.000177832	0.0083443	11	11635003	11722926	+	5777	Ikzf1	GO:0003677;GO:0005634;GO:0005654;GO:0005721;GO:0005829;GO:0019904;GO:0030098;GO:0030218;GO:0032991;GO:0000122;GO:0000977;GO:0001227;	K09220	-	K;B	1AT7F;0UHKV;0V6EU;0DG0S;18W0R;KOG1721;09VFN;1CQQC;12SSB	IKAROS family zinc finger 1 [Source:MGI Symbol;Acc:MGI:1342540]	22778	G5E8H3;Q3UQ33;Q8C5P6
ENSMUSG00000052566	233.816	166.286	301.346	1.81221	0.857753	0.000184925	0.0086491	8	85717232	85729978	+	3978	Hook2	GO:0005737;GO:0005856;GO:0005874;GO:0008017;GO:0030705;GO:0031122;GO:0005515;GO:0005737;GO:0005737;GO:0005813;GO:0005813;GO:0005813;GO:0005815;GO:0005829;GO:0005829;GO:0005856;GO:0005874;GO:0007032;GO:0007032;GO:0007032;GO:0007040;GO:0007040;GO:0007040;GO:0008017;GO:0008017;GO:0008333;GO:0008333;GO:0008333;GO:0015031;GO:0030705;GO:0030705;GO:0030897;GO:0030897;GO:0031122;GO:0031122;GO:0042802;GO:…	K16611	-	Z;U	0V5UC;0IG1M;0DG46;1B33U;12S0C;1CTGV;09UUU;0UPMY;192DE	hook microtubule tethering protein 2 [Source:MGI Symbol;Acc:MGI:2181664]	170833	Q7TMK6
ENSMUSG00000000184	307.027	129.416	484.638	3.7448	1.90489	0.000187464	0.00873968	6	127102125	127129156	-	9409	Ccnd2	GO:0000079;GO:0000082;GO:0000307;GO:0000307;GO:0000785;GO:0001934;GO:0005515;GO:0005634;GO:0005634;GO:0005634;GO:0005654;GO:0005730;GO:0005737;GO:0005737;GO:0005737;GO:0005829;GO:0007049;GO:0007616;GO:0008284;GO:0008344;GO:0016020;GO:0016538;GO:0019901;GO:0031965;GO:0043066;GO:0044772;GO:0045737;GO:0050679;GO:0051301;GO:0051726;GO:0071481;GO:0097129;GO:1900087;GO:1900087;	K10151	-	D	09WBY;0V7AD;1AVB1;18WZ4;1CSBQ;0DHMA;0UIEE;12TGV;KOG0656	cyclin D2 [Source:MGI Symbol;Acc:MGI:88314]	12444	P30280;Q4FK45
ENSMUSG00000029826	8206.85	6731.34	9682.36	1.4384	0.524465	0.00019379	0.00900566	6	38282221	38331538	-	6518	Zc3hav1	GO:0003950;GO:0005829;GO:0046872;GO:0046872;GO:0002376;GO:0003723;GO:0003723;GO:0003950;GO:0005634;GO:0005634;GO:0005737;GO:0005737;GO:0005829;GO:0006471;GO:0009615;GO:0009615;GO:0017151;GO:0032481;GO:0032727;GO:0032728;GO:0032781;GO:0042802;GO:0043123;GO:0045071;GO:0045071;GO:0045087;GO:0046872;GO:0046872;GO:0050691;GO:0051607;GO:0061014;GO:0061014;GO:0071360;GO:0098586;GO:1900246;GO:0002376;GO:…	K15259	EC:2.4.2.30	K	1DE2C;0V25N;1BAIQ;0KE5N;131I4;0W34Z;0E76D;0AQM1	zinc finger CCCH type, antiviral 1 [Source:MGI Symbol;Acc:MGI:1926031]	78781	Q3UPF5
ENSMUSG00000042700	1379.61	1029.47	1729.75	1.68024	0.74867	0.000195815	0.00907069	12	82216094	82498560	+	12806	Sipa1l1	GO:0005096;GO:0005096;GO:0005096;GO:0005737;GO:0005737;GO:0005856;GO:0005886;GO:0014069;GO:0014069;GO:0015629;GO:0019901;GO:0030054;GO:0031532;GO:0031532;GO:0031532;GO:0031625;GO:0032991;GO:0043005;GO:0043025;GO:0043087;GO:0043087;GO:0043087;GO:0043197;GO:0043197;GO:0044877;GO:0045202;GO:0046875;GO:0048013;GO:0048167;GO:0048167;GO:0048814;GO:0048814;GO:0050770;GO:0051015;GO:0051056;GO:0061001;GO:…	K17701	-	W;T	12P2U;0UMPB;0DGA6;09V0S;1CQZJ;18TP9;1AX5M;KOG3686;0V60F	signal-induced proliferation-associated 1 like 1 [Source:MGI Symbol;Acc:MGI:2443679]	217692	Q8C0T5
ENSMUSG00000020275	6387.99	5230.35	7545.63	1.44266	0.528734	0.00019721	0.00910619	11	23686847	23720970	-	7466	Rel	GO:0000978;GO:0001228;GO:0003677;GO:0003700;GO:0003700;GO:0005634;GO:0005634;GO:0005634;GO:0005667;GO:0005737;GO:0005737;GO:0006355;GO:0007249;GO:0007249;GO:0010629;GO:0032688;GO:0043123;GO:0043565;GO:0045893;GO:0045944;GO:1901215;	K09254	-	K	0IG8F;1CPFA;1AT7E;09TEG;13E12;0UM6S;191F7;0DERH;0V4DN	reticuloendotheliosis oncogene [Source:MGI Symbol;Acc:MGI:97897]	19696	A4QPD3
ENSMUSG00000048756	210.229	272.624	147.833	0.542261	-0.882941	0.00020416	0.00937243	10	42057837	42152751	-	7571	Foxo3	GO:0000122;GO:0000976;GO:0000978;GO:0000978;GO:0000981;GO:0001221;GO:0001221;GO:0001227;GO:0001228;GO:0001228;GO:0001542;GO:0001544;GO:0001547;GO:0001556;GO:0003677;GO:0003677;GO:0003700;GO:0003700;GO:0003700;GO:0005515;GO:0005515;GO:0005634;GO:0005634;GO:0005634;GO:0005634;GO:0005654;GO:0005654;GO:0005737;GO:0005737;GO:0005737;GO:0005739;GO:0005739;GO:0005739;GO:0005741;GO:0005741;GO:0005759;GO:…	K09408	-	K	0DQUT;1CZYP;13DZ1;18Y31;0UKYQ;09XVH;0VE27;1B08Z;KOG2294	forkhead box O3 [Source:MGI Symbol;Acc:MGI:1890081]	56484	Q9WVH4
ENSMUSG00000020464	1442.9	961.542	1924.26	2.00122	1.00088	0.000204268	0.00937243	11	29080744	29111828	+	3516	Pnpt1	GO:0000175;GO:0000175;GO:0000175;GO:0000175;GO:0000957;GO:0000957;GO:0000957;GO:0000958;GO:0000958;GO:0000958;GO:0000958;GO:0000962;GO:0000962;GO:0000962;GO:0000964;GO:0000964;GO:0000964;GO:0000965;GO:0000965;GO:0000965;GO:0000965;GO:0003676;GO:0003723;GO:0003723;GO:0004518;GO:0004527;GO:0004654;GO:0004654;GO:0004654;GO:0004654;GO:0004654;GO:0004654;GO:0005634;GO:0005634;GO:0005737;GO:0005737;GO:…	K00962	EC:2.7.7.8	A;J	1ART8;12RHC;0DR5J;18U7B;1D0AT;0V9UT;KOG1067;09YX0;0UM3H	polyribonucleotide nucleotidyltransferase 1 [Source:MGI Symbol;Acc:MGI:1918951]	71701	Q8K1R3
ENSMUSG00000041571	485.198	370.588	599.807	1.61853	0.69468	0.000205562	0.00940203	7	15651133	15656327	-	736	Selenow	GO:0005737;GO:0005829;GO:0005886;GO:0010269;GO:0016209;GO:0016491;GO:0055114;GO:0098869;	-	-	O;W;P	0VKI4;13X9S;1B6RP;0J485;0A9KT;193YC;0DVQI;1D510;0UWAJ	selenoprotein W [Source:MGI Symbol;Acc:MGI:1100878]	20364	P63300
ENSMUSG00000117975	190.627	114.412	266.843	2.3323	1.22175	0.000207314	0.00945235	19	47883041	47907738	-	3950	Itprip	GO:0004860;GO:0004860;GO:0005515;GO:0005634;GO:0005640;GO:0005886;GO:0006469;GO:0016020;GO:0016020;GO:0016021;GO:1902042;	-	-	T	1B2SD;0UTJS;0DNAV;1922W;13HUF;0IFEJ;0VBJQ;1CX7U;0A0PI	inositol 1,4,5-triphosphate receptor interacting protein [Source:MGI Symbol;Acc:MGI:3042776]	414801	Q3TNL8
ENSMUSG00000070031	602.135	348.585	855.685	2.45474	1.29557	0.000210548	0.00956969	1	85528099	85572758	+	3328	Sp140	GO:0001650;GO:0005739;GO:0001650;GO:0003677;GO:0005634;GO:0005634;GO:0005739;GO:0046872;GO:0001650;GO:0005739;GO:0001650;GO:0003677;GO:0005634;GO:0005739;GO:0046872;	K24504	-	O;K	KOG2177;1D0GQ;18SA3;13UYR;0A4TK;1B35S;0UUA4;0DRB8;0VFNG	Sp140 nuclear body protein [Source:MGI Symbol;Acc:MGI:3702467]	434484	Q6NSQ5
ENSMUSG00000040296	6857.09	4342.3	9371.88	2.15828	1.10988	0.000212401	0.00962377	4	40203773	40239828	-	7050	Ddx58	GO:0000166;GO:0002230;GO:0002230;GO:0002376;GO:0002735;GO:0003677;GO:0003690;GO:0003723;GO:0003724;GO:0003725;GO:0003725;GO:0003725;GO:0003727;GO:0003727;GO:0003727;GO:0004386;GO:0005515;GO:0005515;GO:0005524;GO:0005524;GO:0005737;GO:0005737;GO:0005737;GO:0005829;GO:0005829;GO:0005856;GO:0005886;GO:0005886;GO:0005923;GO:0005923;GO:0008270;GO:0008270;GO:0008270;GO:0009597;GO:0009615;GO:0009615;GO:…	K12646	EC:3.6.4.13	A;K	1ATHZ;0V4TZ;KOG0354;0DQ4Z;12NQ7;18ZIS;0UTEU;1CZ68;09TUS	DEAD/H box helicase 58 [Source:MGI Symbol;Acc:MGI:2442858]	230073	Q6Q899;A1L0V6
ENSMUSG00000031904	210.115	272.311	147.918	0.543196	-0.880454	0.000214278	0.00967855	8	106895489	106925338	+	4570	Slc7a6	GO:0005886;GO:0005886;GO:0005886;GO:0006865;GO:0015174;GO:0015174;GO:0015179;GO:0015297;GO:0015807;GO:0015822;GO:0015822;GO:0016020;GO:0016020;GO:0016021;GO:0016323;GO:0022857;GO:0043231;GO:0043231;GO:0055085;GO:1902475;GO:1990822;GO:1990822;GO:0006865;GO:0016020;GO:0016020;GO:0016021;GO:0022857;GO:0055085;GO:0006865;GO:0016020;GO:0016020;GO:0016021;GO:0022857;GO:0055085;GO:0006865;GO:0016020;GO:…	K13872	-	E	12P2T;09V1W;18VUV;0USPY;0V61J;1CRHI;0DJ8J;KOG1287;1B3B2	solute carrier family 7 (cationic amino acid transporter, y+ system), member 6 [Source:MGI Symbol;Acc:MGI:2142598]	330836	Q8BGK6
ENSMUSG00000004070	717.402	539.009	895.795	1.66193	0.732859	0.000216556	0.00975109	16	4544225	4584606	+	2217	Hmox2	GO:0004392;GO:0006788;GO:0046872;GO:0055114;GO:0001666;GO:0004392;GO:0004392;GO:0004392;GO:0004392;GO:0004392;GO:0005783;GO:0005886;GO:0006788;GO:0006788;GO:0006788;GO:0006979;GO:0006979;GO:0006979;GO:0016020;GO:0016021;GO:0016491;GO:0020037;GO:0042167;GO:0043231;GO:0046872;GO:0055072;GO:0055114;GO:0055114;GO:0001666;GO:0004392;GO:0004392;GO:0004392;GO:0004392;GO:0005783;GO:0005886;GO:0006788;GO:…	K21418	EC:1.14.14.18	P	1CZAN;0UTIN;0VDH9;18XJ4;1B4SK;0A2M8;0DHVV;KOG4480;13HAU	heme oxygenase 2 [Source:MGI Symbol;Acc:MGI:109373]	15369	O70252;Q544R7
ENSMUSG00000032119	597.71	462.963	732.457	1.58211	0.661849	0.00021784	0.0097785	9	44203737	44216968	-	8303	Hinfp	GO:0000077;GO:0000077;GO:0000077;GO:0000082;GO:0000082;GO:0000082;GO:0000083;GO:0000083;GO:0000083;GO:0000122;GO:0000785;GO:0000976;GO:0000976;GO:0000976;GO:0000977;GO:0000977;GO:0000978;GO:0000978;GO:0000981;GO:0001227;GO:0001228;GO:0001228;GO:0001228;GO:0001701;GO:0003677;GO:0003677;GO:0003677;GO:0003682;GO:0003700;GO:0003700;GO:0003700;GO:0005634;GO:0005634;GO:0005634;GO:0005654;GO:0005654;GO:…	-	-	K	0DF00;0UGJK;0V507;12NH1;18TDR;09U1E;1CQ0W;KOG3608;1ASHN	histone H4 transcription factor [Source:MGI Symbol;Acc:MGI:2429620]	102423	Q8K1K9
ENSMUSG00000030149	318.621	126.428	510.814	4.04036	2.01448	0.00022265	0.00996357	6	129587286	129600827	-	7183	Klrk1	GO:0002250;GO:0005886;GO:0016020;GO:0016021;GO:0030154;GO:0045954;GO:0002223;GO:0002250;GO:0002376;GO:0002860;GO:0005515;GO:0005515;GO:0005886;GO:0005886;GO:0009897;GO:0009897;GO:0009986;GO:0009986;GO:0016020;GO:0016021;GO:0030101;GO:0030154;GO:0030246;GO:0030887;GO:0032394;GO:0032729;GO:0038023;GO:0042288;GO:0043065;GO:0045087;GO:0045429;GO:0045954;GO:0045954;GO:0045954;GO:0045954;GO:0050830;GO:…	K06728	-	T;V	196A5;0VBMB;13TKE;1CX9E;1ASIS;KOG4297;0A0QX;0DNCD;0URP1	killer cell lectin-like receptor subfamily K, member 1 [Source:MGI Symbol;Acc:MGI:1196250]	27007	O54709;Q4FJM0
ENSMUSG00000032802	15171.4	17839.5	12503.4	0.700882	-0.512756	0.000224785	0.0100282	2	151947436	151953296	+	2820	Srxn1	GO:0000166;GO:0005524;GO:0005829;GO:0006979;GO:0016209;GO:0016491;GO:0016667;GO:0032542;GO:0032542;GO:0055114;GO:0055114;GO:0098869;	K12260	EC:1.8.98.2	-	-	sulfiredoxin 1 homolog (S. cerevisiae) [Source:MGI Symbol;Acc:MGI:104971]	76650	Q9D975;A2AQU8
ENSMUSG00000031311	3745.87	2971.05	4520.7	1.52158	0.605572	0.000226072	0.0100547	X	100472924	100492197	+	4375	Nono	GO:0003676;GO:0003723;GO:0000398;GO:0000976;GO:0001650;GO:0001650;GO:0002218;GO:0002218;GO:0002376;GO:0003676;GO:0003676;GO:0003677;GO:0003682;GO:0003723;GO:0005515;GO:0005515;GO:0005515;GO:0005515;GO:0005634;GO:0005634;GO:0005634;GO:0005634;GO:0005654;GO:0005654;GO:0005730;GO:0006281;GO:0006310;GO:0006355;GO:0006397;GO:0006974;GO:0007623;GO:0007623;GO:0007623;GO:0008380;GO:0016363;GO:0016363;GO:…	K13214	-	A;K	09TWP;1CZ8C;12S4J;0DQ70;KOG0115;18X4A;0V8FF;1B3J1;0UTGV	non-POU-domain-containing, octamer binding protein [Source:MGI Symbol;Acc:MGI:1855692]	53610	Q99K48;Q4FK11
ENSMUSG00000070730	643.497	501.134	785.86	1.56816	0.649074	0.000229545	0.0101779	2	118967482	118987515	-	3537	Rmdn3	GO:0000922;GO:0005634;GO:0005737;GO:0005739;GO:0005739;GO:0005739;GO:0005741;GO:0005741;GO:0005741;GO:0005819;GO:0005856;GO:0005874;GO:0005876;GO:0005876;GO:0006874;GO:0006874;GO:0006874;GO:0006915;GO:0008017;GO:0008017;GO:0016020;GO:0016021;GO:0030154;GO:0044232;GO:0044232;GO:0045171;GO:0045171;GO:0097431;GO:0097431;GO:0016020;GO:0016021;GO:0016020;GO:0016021;GO:0016020;GO:0016021;	K23293	-	S;M	0IFRV;09YIJ;0UGJ5;1ASB3;191IM;0DFAV;0V4ZV;1CQ0M;12R8R	regulator of microtubule dynamics 3 [Source:MGI Symbol;Acc:MGI:1915059]	67809	Q3UJU9
ENSMUSG00000049657	419.084	317.671	520.497	1.63848	0.712356	0.000232609	0.0102823	4	44991242	45012412	-	5606	Zbtb5	GO:0000122;GO:0000977;GO:0000978;GO:0000981;GO:0001227;GO:0001227;GO:0003677;GO:0005634;GO:0005634;GO:0005634;GO:0006357;GO:0046872;GO:0000122;GO:0000122;GO:0000977;GO:0000977;GO:0000978;GO:0000981;GO:0001227;GO:0001227;GO:0001227;GO:0003677;GO:0005634;GO:0005634;GO:0005634;GO:0005634;GO:0006357;GO:0046872;GO:0000122;GO:0000977;GO:0000978;GO:0000981;GO:0001227;GO:0001227;GO:0003677;GO:0005634;GO:…	K10492	-	K	12REP;0DK7F;1ASAA;0UGI9;18T53;KOG1721;1CUZS;0V7V3;09WAF	zinc finger and BTB domain containing 5 [Source:MGI Symbol;Acc:MGI:1924601]	230119	Q7TQG0
ENSMUSG00000026031	22678.8	18710.6	26646.9	1.42416	0.510111	0.000236142	0.0103615	1	58750667	58798043	+	12669	Cflar	GO:0001666;GO:0002020;GO:0002020;GO:0004197;GO:0005123;GO:0005737;GO:0006508;GO:0006915;GO:0008047;GO:0008234;GO:0010667;GO:0010976;GO:0031264;GO:0031264;GO:0031265;GO:0032869;GO:0033574;GO:0042981;GO:0043066;GO:0043123;GO:0044877;GO:0045121;GO:0060544;GO:0070374;GO:0071364;GO:0071392;GO:0071456;GO:0071549;GO:0071732;GO:0072126;GO:0097342;GO:1902042;GO:1903055;GO:1903427;GO:1903845;GO:1903944;GO:…	K04724	-	D	1AS4Y;0VANN;18WP8;0DMAB;13HU3;1CW5I;09ZS9;0UQFM;KOG3573	CASP8 and FADD-like apoptosis regulator [Source:MGI Symbol;Acc:MGI:1336166]	12633	O35732;Q812G4
ENSMUSG00000021108	364.692	456.484	272.899	0.597829	-0.742194	0.000236335	0.0103615	12	73631570	73824959	+	7530	Prkch	GO:0000166;GO:0004672;GO:0004674;GO:0004674;GO:0004674;GO:0004697;GO:0004697;GO:0004698;GO:0004699;GO:0004699;GO:0005515;GO:0005524;GO:0005524;GO:0005737;GO:0005737;GO:0005829;GO:0005829;GO:0005829;GO:0005886;GO:0005886;GO:0005911;GO:0006468;GO:0006468;GO:0006468;GO:0006468;GO:0010744;GO:0016020;GO:0016020;GO:0016301;GO:0016310;GO:0016740;GO:0018105;GO:0019899;GO:0030154;GO:0031267;GO:0034351;GO:…	K18051	EC:2.7.11.13	T	18W2J;KOG0694;09V0U;0URBX;1B3UD;0DHVB;1CSNV;12NBF;0V6DY	protein kinase C, eta [Source:MGI Symbol;Acc:MGI:97600]	18755	P23298;Q3UKY1
ENSMUSG00000070034	2745.75	1556.78	3934.71	2.52747	1.33769	0.000237784	0.0103615	1	85504620	85526538	-	6781	Sp110	GO:0000981;GO:0002376;GO:0003677;GO:0003677;GO:0005634;GO:0005634;GO:0005634;GO:0005654;GO:0006357;GO:0006915;GO:0009617;GO:0043065;GO:0045087;	K24503	-	O;K	KOG2177;0UM76;0DIN3;09XAP;193WH;1CTCZ;0V891;13QZ7;1AVSY	Sp110 nuclear body protein [Source:MGI Symbol;Acc:MGI:1923364]	109032	Q8BVK9
ENSMUSG00000046688	1721.6	1389.53	2053.67	1.47795	0.563602	0.000237954	0.0103615	3	127583454	127625813	+	3199	Tifa	GO:0002376;GO:0002753;GO:0002753;GO:0002753;GO:0005515;GO:0005515;GO:0005737;GO:0005737;GO:0005737;GO:0007249;GO:0007249;GO:0007249;GO:0043123;GO:0043123;GO:0043123;GO:0045087;GO:0045087;GO:0045087;GO:0051260;GO:0051260;GO:0002376;GO:0002753;GO:0002753;GO:0002753;GO:0005515;GO:0005515;GO:0005737;GO:0005737;GO:0005737;GO:0007249;GO:0007249;GO:0007249;GO:0043123;GO:0043123;GO:0043123;GO:0045087;GO:…	K23826	-	T	1CWEE;0UTF7;13TG4;18VJR;1AYST;0VFTZ;0A51J;0DIHI;0IYNH	TRAF-interacting protein with forkhead-associated domain [Source:MGI Symbol;Acc:MGI:2182965]	211550	Q793I8;I3PQW8
ENSMUSG00000005225	264.47	336.863	192.077	0.570192	-0.81048	0.000238634	0.0103615	6	54572096	54622824	+	7005	Plekha8	GO:0005654;GO:0005654;GO:0005737;GO:0005794;GO:0005794;GO:0005794;GO:0005802;GO:0005802;GO:0005802;GO:0005829;GO:0006869;GO:0006869;GO:0006869;GO:0008289;GO:0016020;GO:0016020;GO:0017089;GO:0017089;GO:0017089;GO:0035621;GO:0035621;GO:0035621;GO:0035621;GO:0035627;GO:0046836;GO:0051861;GO:0051861;GO:0051861;GO:0070273;GO:0070273;GO:0070273;GO:0097001;GO:0097001;GO:0097001;GO:0120009;GO:0120009;GO:…	K08051	-	T;G;U	0V91H;12TAW;18YPA;1CU9N;KOG3221;0UN7U;1AXQW;0DJH5;09Y42	pleckstrin homology domain containing, family A (phosphoinositide binding specific) member 8 [Source:MGI Symbol;Acc:MGI:2681164]	231999	Q80W71
ENSMUSG00000000078	23343.9	17224.9	29462.9	1.71049	0.774408	0.000238688	0.0103615	13	5911481	5920393	+	4391	Klf6	GO:0000978;GO:0001228;GO:0001650;GO:0005654;GO:0005730;GO:0005829;GO:0043231;GO:0045944;GO:1990837;	K09207	-	K	1CUAB;18TAS;1AUQ5;13HQY;0UI48;KOG1721;09Y7Z;0DJHW;0V95K	Kruppel-like factor 6 [Source:MGI Symbol;Acc:MGI:1346318]	23849	Q8BPQ2
ENSMUSG00000048701	687.39	537.882	836.898	1.55591	0.637763	0.000241861	0.0104679	10	69932951	70029030	+	6385	Ccdc6	GO:0005737;GO:0005829;GO:0005829;GO:0005856;GO:0008150;GO:0017124;GO:0042802;GO:0042802;	K09288	-	S	0V7IF;0DHV3;1AZ4C;0UQER;18ZYS;KOG2129;1CSJU;09UMW;12PZG	coiled-coil domain containing 6 [Source:MGI Symbol;Acc:MGI:1923801]	76551	D3YZP9
ENSMUSG00000003382	2910.79	2148.53	3673.05	1.70957	0.773634	0.000244787	0.010563	3	87432714	87447463	+	10274	Etv3	GO:0000122;GO:0000122;GO:0000122;GO:0000785;GO:0000977;GO:0000981;GO:0001227;GO:0001227;GO:0003677;GO:0003700;GO:0005515;GO:0005634;GO:0005634;GO:0005654;GO:0006355;GO:0006357;GO:0008285;GO:0017053;GO:0017151;GO:0030154;GO:0043231;GO:0043565;GO:0090571;GO:0097011;GO:1990837;GO:1990837;GO:0000122;GO:0000122;GO:0000122;GO:0000785;GO:0000977;GO:0000981;GO:0001227;GO:0001227;GO:0003677;GO:0003700;GO:…	K09433	-	K	KOG3806;0DN90;1CZY9;18UN3;0A378;1B1QE;0UHAG;0VE21;13KWJ	ets variant 3 [Source:MGI Symbol;Acc:MGI:1350926]	27049	Q8R4Z4
ENSMUSG00000042167	1443.14	1161.3	1724.99	1.4854	0.570849	0.000246714	0.0106145	13	93282790	93328893	-	4173	Tent2	GO:0000166;GO:0002244;GO:0004652;GO:0004652;GO:0004652;GO:0005515;GO:0005524;GO:0005634;GO:0005634;GO:0005634;GO:0005737;GO:0005737;GO:0005829;GO:0006378;GO:0006397;GO:0006397;GO:0016740;GO:0016779;GO:0034062;GO:0034062;GO:0043489;GO:0043489;GO:0043631;GO:0046872;GO:0070566;GO:0070566;GO:0071044;GO:0071044;GO:2000626;GO:2000626;GO:0000166;GO:0002244;GO:0004652;GO:0004652;GO:0004652;GO:0004652;GO:…	K14079	EC:2.7.7.19	D	09W76;1CS6I;1AYXB;13DJH;KOG2277;0V75F;18VT3;0DHGB;0UJMW	terminal nucleotidyltransferase 2 [Source:MGI Symbol;Acc:MGI:2140950]	100715	Q91YI6
ENSMUSG00000052087	247.364	137.318	357.41	2.6028	1.38006	0.000255387	0.0109552	13	55517545	55532500	+	4239	Rgs14	GO:0000278;GO:0000922;GO:0000922;GO:0000922;GO:0001965;GO:0001965;GO:0001965;GO:0005092;GO:0005092;GO:0005092;GO:0005092;GO:0005092;GO:0005096;GO:0005096;GO:0005096;GO:0005096;GO:0005096;GO:0005515;GO:0005634;GO:0005634;GO:0005634;GO:0005737;GO:0005737;GO:0005737;GO:0005813;GO:0005813;GO:0005813;GO:0005815;GO:0005819;GO:0005819;GO:0005819;GO:0005856;GO:0005874;GO:0005886;GO:0005886;GO:0005886;GO:…	K17706	-	T	09WFZ;12U1H;0V7EI;1CSFT;0DHRF;KOG3589;1908Q;0UNR5;1B4HI	regulator of G-protein signaling 14 [Source:MGI Symbol;Acc:MGI:1859709]	51791	P97492
ENSMUSG00000053007	1059.77	670.98	1448.56	2.15887	1.11027	0.000265617	0.0113604	6	53264255	53677361	+	25021	Creb5	GO:0003677;GO:0003700;GO:0003700;GO:0005634;GO:0006355;GO:0003677;GO:0003700;GO:0003700;GO:0003700;GO:0005634;GO:0006355;GO:0045893;GO:1990837;GO:0003677;GO:0003700;GO:0003700;GO:0005634;GO:0006355;GO:0003677;GO:0003700;GO:0003700;GO:0005634;GO:0006355;	K09047	-	K	1ARYY;0USN8;13IHN;0VCHI;0DP9Z;KOG1414;18SS7;0A1MS;1CY80	cAMP responsive element binding protein 5 [Source:MGI Symbol;Acc:MGI:2443973]	231991	Q8K1L0;A0A0N4SUK5
ENSMUSG00000029501	701.442	550.386	852.497	1.54891	0.63125	0.000270722	0.0115447	5	110378870	110404517	+	5520	Ankle2	GO:0005783;GO:0005783;GO:0005789;GO:0007049;GO:0007084;GO:0007084;GO:0007084;GO:0007084;GO:0007417;GO:0007417;GO:0007417;GO:0016020;GO:0016021;GO:0030176;GO:0030176;GO:0030176;GO:0035307;GO:0035307;GO:0035307;GO:0035307;GO:0035307;GO:0042326;GO:0042326;GO:0042326;GO:0042326;GO:0043066;GO:0043066;GO:0043066;GO:0051301;GO:0051721;GO:0051721;GO:0051721;GO:0051721;GO:0051721;GO:0005783;GO:0005783;GO:…	K21412	-	S;T;U	0UPT9;0IE4A;0DMVJ;13I0R;18XZ9;0VB4X;1B0Y2;0A08Y;1CWR6	ankyrin repeat and LEM domain containing 2 [Source:MGI Symbol;Acc:MGI:1261856]	71782	Q6P1H6
ENSMUSG00000063193	1029.26	1238.3	820.216	0.662373	-0.594284	0.000271578	0.0115473	11	114813607	114825212	-	2917	Cd300lb	GO:0016020;GO:0016021;GO:0002376;GO:0002446;GO:0004888;GO:0005515;GO:0005886;GO:0005886;GO:0016020;GO:0016021;GO:0033005;GO:0071222;GO:0016020;GO:0016021;	K20395	-	-	-	CD300 molecule like family member B [Source:MGI Symbol;Acc:MGI:2685099]	217304	Q3U497;Q3TEQ8;A0A0R3P9D2
ENSMUSG00000050029	3118.06	2106.76	4129.36	1.96005	0.970894	0.00027561	0.0116844	X	50092789	50106895	-	3545	Rap2c	GO:0000166;GO:0003713;GO:0003713;GO:0003924;GO:0003924;GO:0005525;GO:0005525;GO:0005525;GO:0005525;GO:0005525;GO:0005737;GO:0005737;GO:0005737;GO:0005768;GO:0005829;GO:0005886;GO:0005886;GO:0005886;GO:0005923;GO:0005923;GO:0007165;GO:0016020;GO:0016020;GO:0016020;GO:0016787;GO:0019003;GO:0019003;GO:0019003;GO:0030336;GO:0030336;GO:0031954;GO:0032486;GO:0032486;GO:0032486;GO:0044291;GO:0044291;GO:…	K07839	-	S;J	1AYXM;0V7XB;0DI9U;0UKQK;190GV;1CT0A;09WZA;KOG0395;12RFZ	RAP2C, member of RAS oncogene family [Source:MGI Symbol;Acc:MGI:1919315]	72065	Q8BU31
ENSMUSG00000030766	3365.98	2755.34	3976.62	1.44324	0.52931	0.000285447	0.0120563	7	122878441	122969138	-	9759	Arhgap17	GO:0005096;GO:0005096;GO:0005654;GO:0005737;GO:0005737;GO:0005737;GO:0005829;GO:0005829;GO:0005886;GO:0005923;GO:0007015;GO:0007015;GO:0007165;GO:0016020;GO:0017124;GO:0017156;GO:0017156;GO:0030054;GO:0031267;GO:0032956;GO:0035020;GO:0043547;GO:0005096;GO:0005096;GO:0005654;GO:0005654;GO:0005737;GO:0005737;GO:0005737;GO:0005829;GO:0005829;GO:0005829;GO:0005886;GO:0005923;GO:0007015;GO:0007015;GO:…	K20638	-	T	1AZRD;0UFU4;KOG4270;1CPGQ;0V4F1;12S0N;09TFY;18YRY;0DESX	Rho GTPase activating protein 17 [Source:MGI Symbol;Acc:MGI:1917747]	70497	Q3UIA2
ENSMUSG00000019979	1096.73	715.839	1477.62	2.06417	1.04556	0.000286045	0.0120563	10	90825173	90918632	-	9028	Apaf1	GO:0000166;GO:0001843;GO:0005524;GO:0005634;GO:0005737;GO:0005737;GO:0005829;GO:0005829;GO:0006915;GO:0006919;GO:0007275;GO:0007420;GO:0008635;GO:0008656;GO:0010659;GO:0030900;GO:0031072;GO:0032991;GO:0042802;GO:0042981;GO:0043293;GO:0043293;GO:0043531;GO:0051402;GO:0070059;GO:0071560;GO:0097190;GO:1902510;GO:2001235;GO:0000166;GO:0001666;GO:0001822;GO:0001843;GO:0005524;GO:0005634;GO:0005737;GO:…	K02084	-	T;U	1DFYG;0B5QP;13F53;0E92A;KOG4658;197CS;0WID0;KOG4155;0V3JZ;1BBB1	apoptotic peptidase activating factor 1 [Source:MGI Symbol;Acc:MGI:1306796]	11783	O88879;Q5DU30
ENSMUSG00000031355	347.348	260.033	434.663	1.67157	0.741204	0.000287124	0.0120667	X	167578095	168087431	+	12128	Arhgap6	GO:0005096;GO:0005096;GO:0005096;GO:0005737;GO:0005737;GO:0005737;GO:0005829;GO:0005829;GO:0007015;GO:0007015;GO:0007165;GO:0007202;GO:0007202;GO:0010518;GO:0015629;GO:0016004;GO:0016004;GO:0017124;GO:0043087;GO:0043087;GO:0043274;GO:0043274;GO:0043547;GO:0048041;GO:0051497;GO:0051497;GO:0051895;GO:0051895;GO:0005096;GO:0007015;GO:0007165;GO:0043087;GO:0043547;GO:0005096;GO:0007015;GO:0007165;GO:…	K20631	-	T	KOG2710;1B1CM;0UMG9;0DNYA;12TDV;1CXVS;18Y5H;0A1AN;0VC6D	Rho GTPase activating protein 6 [Source:MGI Symbol;Acc:MGI:1196332]	11856	O54834
ENSMUSG00000038518	1104.81	884.487	1325.13	1.49819	0.583219	0.000290895	0.0121898	13	44882950	45075119	+	9715	Jarid2	GO:0000122;GO:0000122;GO:0001889;GO:0003677;GO:0003677;GO:0003677;GO:0003682;GO:0005515;GO:0005515;GO:0005515;GO:0005634;GO:0005634;GO:0005654;GO:0005739;GO:0006325;GO:0006338;GO:0007275;GO:0008134;GO:0008285;GO:0010614;GO:0016577;GO:0030154;GO:0031061;GO:0034721;GO:0035097;GO:0035097;GO:0035098;GO:0035098;GO:0042127;GO:0045892;GO:0045892;GO:0048536;GO:0048538;GO:0048863;GO:0051574;GO:0060044;GO:…	K11478	-	K	0WIFS;197D1;0V3KU;0B5T9;0ISPM;13F8T;0E93U;1DFZU;1BBBP	jumonji, AT rich interactive domain 2 [Source:MGI Symbol;Acc:MGI:104813]	16468	Q62315
ENSMUSG00000051306	461.328	347.664	574.992	1.65387	0.725849	0.000292276	0.0122124	5	143696080	143718035	-	6238	Usp42	GO:0004197;GO:0004843;GO:0004843;GO:0004843;GO:0004843;GO:0004843;GO:0005634;GO:0005829;GO:0006508;GO:0006511;GO:0007283;GO:0008233;GO:0008234;GO:0016579;GO:0016579;GO:0016579;GO:0016579;GO:0016579;GO:0016787;GO:0018215;GO:0030154;GO:0042981;	K11855	EC:3.4.19.12	O	KOG1865;1CQSD;18XFJ;09UT9;1AURQ;12RKS;0UPUT;0V5SU;0DG2W	ubiquitin specific peptidase 42 [Source:MGI Symbol;Acc:MGI:1924050]	76800	B2RQC2
ENSMUSG00000021087	1783.37	1352.52	2214.21	1.63709	0.711134	0.000294657	0.0122765	12	72258526	72455828	-	4980	Rtn1	GO:0000139;GO:0000139;GO:0000139;GO:0005783;GO:0005783;GO:0005783;GO:0005789;GO:0005789;GO:0005790;GO:0005794;GO:0008150;GO:0016020;GO:0016021;GO:1902430;GO:1902430;GO:0005783;GO:0005789;GO:0016020;GO:0016021;GO:0005783;GO:0005789;GO:0016020;GO:0016021;	K20721	-	U	13BRI;1B0CF;1CQSZ;192C8;0DG3E;0URYM;0VBVP;0A2IP;KOG1792	reticulon 1 [Source:MGI Symbol;Acc:MGI:1933947]	104001	Q8K0T0;Q4FJL2;Q05CD8
ENSMUSG00000032589	237.32	307.321	167.319	0.544444	-0.877146	0.000300593	0.012488	9	107973221	108067583	-	15938	Bsn	GO:0001222;GO:0005515;GO:0005515;GO:0005737;GO:0005798;GO:0005802;GO:0005856;GO:0007416;GO:0008021;GO:0008021;GO:0008088;GO:0008090;GO:0009986;GO:0014069;GO:0016020;GO:0019898;GO:0030054;GO:0030424;GO:0030424;GO:0030425;GO:0030672;GO:0031410;GO:0035418;GO:0035418;GO:0042995;GO:0043025;GO:0044306;GO:0045202;GO:0045202;GO:0045202;GO:0045503;GO:0046872;GO:0046872;GO:0048786;GO:0048786;GO:0048786;GO:…	-	-	Z;S	1CY4D;12U56;1AUUP;0USWT;1912Y;0IGEH;0DJNN;0A1IC;0VCE0	bassoon [Source:MGI Symbol;Acc:MGI:1277955]	12217	O88737;Q3UXD6
ENSMUSG00000021065	350.497	252.478	448.517	1.77646	0.829006	0.000302856	0.012546	12	77284899	77523112	+	7902	Fut8	GO:0005794;GO:0006486;GO:0006487;GO:0006491;GO:0007179;GO:0007229;GO:0007585;GO:0008424;GO:0008424;GO:0008424;GO:0010468;GO:0016020;GO:0016021;GO:0016021;GO:0016477;GO:0016740;GO:0016757;GO:0016757;GO:0017124;GO:0018279;GO:0018279;GO:0032580;GO:0032580;GO:0033578;GO:0036071;GO:0036071;GO:0043112;GO:0046368;GO:0046368;GO:0046921;GO:0046921;GO:1900407;GO:0005794;GO:0006486;GO:0006487;GO:0006491;GO:…	K00717	EC:2.4.1.68	O	KOG3705;1CSI2;0DHTN;18XIV;09WIE;0V7GY;0UM6I;12RWU;1AWN8	fucosyltransferase 8 [Source:MGI Symbol;Acc:MGI:1858901]	53618	Q9WTS2
ENSMUSG00000041959	2355.01	1826.73	2883.29	1.57838	0.658448	0.000310275	0.0128167	3	93462387	93471950	+	1212	S100a10	GO:0001765;GO:0001765;GO:0005509;GO:0005509;GO:0005515;GO:0005515;GO:0005615;GO:0005737;GO:0005783;GO:0005783;GO:0006900;GO:0006900;GO:0016020;GO:0016021;GO:0019897;GO:0042493;GO:0042803;GO:0042803;GO:0043547;GO:0043547;GO:0044325;GO:0044325;GO:0044325;GO:0045121;GO:0045121;GO:0048306;GO:0051099;GO:0051496;GO:0051496;GO:0051894;GO:0051894;GO:0062023;GO:0072659;GO:0072659;GO:1900026;GO:1900026;GO:…	K17274	-	T;P	13RKA;193MD;0IXW9;0VIHB;1B602;0A89I;0DUEJ;0UVEI;1D3SC	S100 calcium binding protein A10 (calpactin) [Source:MGI Symbol;Acc:MGI:1339468]	20194	P08207;Q3TC45
ENSMUSG00000052353	412.605	542.679	282.531	0.520623	-0.941688	0.000313067	0.0128953	7	83582065	83735710	-	12232	Cemip	GO:0004415;GO:0004415;GO:0004415;GO:0005540;GO:0005540;GO:0005540;GO:0005576;GO:0005634;GO:0005737;GO:0005737;GO:0005737;GO:0005783;GO:0005783;GO:0005783;GO:0005886;GO:0005886;GO:0005886;GO:0005905;GO:0007605;GO:0007605;GO:0008152;GO:0010800;GO:0010800;GO:0010800;GO:0016020;GO:0016787;GO:0016798;GO:0030214;GO:0030214;GO:0030214;GO:0030335;GO:0030335;GO:0030335;GO:0030665;GO:0032050;GO:0032050;GO:…	K19031	EC:3.2.1.35	S	0V9F4;0UN3N;1AVBF;1CUR8;18VAX;12SC1;09YCH;0DJXS;0IFCM	cell migration inducing protein, hyaluronan binding [Source:MGI Symbol;Acc:MGI:2443629]	80982	Q8BI06;Q5M9P4
ENSMUSG00000036461	1243.59	921.165	1566.01	1.70003	0.765564	0.000319556	0.0131254	14	79718634	79819934	+	6737	Elf1	GO:0000978;GO:0000978;GO:0000981;GO:0001228;GO:0001228;GO:0001817;GO:0003677;GO:0003700;GO:0003700;GO:0003700;GO:0005634;GO:0005634;GO:0005634;GO:0006355;GO:0006355;GO:0006355;GO:0006357;GO:0030154;GO:0043565;GO:0045893;GO:0045944;GO:0045944;GO:0045944;GO:0050860;GO:1990837;GO:0000978;GO:0000978;GO:0000981;GO:0001228;GO:0001228;GO:0001817;GO:0003677;GO:0003700;GO:0003700;GO:0003700;GO:0005634;GO:…	K09428	-	K	KOG3804;0US6I;13QSC;0DMK0;0A00C;1CWFA;18X3A;0VAX0;1AVPM	E74-like factor 1 [Source:MGI Symbol;Acc:MGI:107180]	13709	Q60775;Q3UQ47;Q3V1H4
ENSMUSG00000038910	507.341	342.923	671.759	1.95892	0.970059	0.00032504	0.0133129	17	50816431	50995512	+	6626	Plcl2	GO:0002322;GO:0002337;GO:0004435;GO:0005737;GO:0006629;GO:0007165;GO:0007165;GO:0007214;GO:0008081;GO:0032228;GO:0032228;GO:0033135;GO:0035556;GO:0048015;GO:0050811;GO:0050811;GO:0050811;GO:0050859;GO:0070679;GO:0120163;GO:1900122;	K15370	-	I	0DGEM;12NH2;1AS3N;191HU;0V5XZ;09V5I;0UI6F;1CR44;KOG0169	phospholipase C-like 2 [Source:MGI Symbol;Acc:MGI:1352756]	224860	Q8K394
ENSMUSG00000057554	1773.39	1441.44	2105.34	1.46059	0.546548	0.00032901	0.013435	13	12454296	12479825	-	3688	Lgals8	GO:0002317;GO:0005178;GO:0005178;GO:0005737;GO:0005737;GO:0005737;GO:0005829;GO:0005829;GO:0005829;GO:0006914;GO:0030246;GO:0030246;GO:0030246;GO:0030246;GO:0031295;GO:0031410;GO:0098586;GO:0098586;GO:0098792;GO:0098792;GO:1904977;GO:1904977;GO:1904977;GO:0002317;GO:0005178;GO:0005178;GO:0005737;GO:0005737;GO:0005737;GO:0005829;GO:0005829;GO:0005829;GO:0006914;GO:0030246;GO:0030246;GO:0030246;GO:…	K06832	-	W	12THH;1CWKT;1AYC8;0A05C;18UC6;0DKXJ;0VB1J;KOG3587;0UQYT	lectin, galactose binding, soluble 8 [Source:MGI Symbol;Acc:MGI:1928481]	56048	Q9JL15;Q542M5
ENSMUSG00000031540	1924.47	1566.96	2281.98	1.45631	0.542316	0.000329874	0.013435	8	23349551	23433275	+	9330	Kat6a	GO:0000786;GO:0003677;GO:0003713;GO:0004402;GO:0004402;GO:0005634;GO:0005634;GO:0006334;GO:0006355;GO:0016573;GO:0016740;GO:0016746;GO:0043966;GO:0045893;GO:0046872;GO:0048513;GO:0070776;GO:0000786;GO:0003677;GO:0003713;GO:0004402;GO:0004402;GO:0005634;GO:0005634;GO:0006334;GO:0006355;GO:0016573;GO:0016740;GO:0016746;GO:0043966;GO:0045893;GO:0046872;GO:0048513;GO:0070776;GO:0000786;GO:0003677;GO:…	K11305	EC:2.3.1.48	B	0DHXM;1B0KH;09TEF;19155;12N6V;0UQFG;1CSNC;KOG2747;0V4DM	K(lysine) acetyltransferase 6A [Source:MGI Symbol;Acc:MGI:2442415]	244349	G3X940
ENSMUSG00000025337	3703.38	3044.6	4362.16	1.43276	0.518792	0.000335259	0.013616	5	130274572	130284371	-	2033	Sbds	GO:0000922;GO:0000922;GO:0000922;GO:0001833;GO:0002244;GO:0002244;GO:0002244;GO:0005634;GO:0005634;GO:0005634;GO:0005654;GO:0005654;GO:0005654;GO:0005730;GO:0005730;GO:0005730;GO:0005737;GO:0005737;GO:0005737;GO:0005819;GO:0005829;GO:0005829;GO:0005856;GO:0006364;GO:0006364;GO:0007052;GO:0007052;GO:0008017;GO:0008017;GO:0019843;GO:0019843;GO:0030282;GO:0030282;GO:0030595;GO:0030595;GO:0042254;GO:…	K14574	-	J	0V7P0;KOG2917;1B312;0UKCI;12PHJ;1CSR1;0DI0A;09WQH;18YBM	SBDS ribosome maturation factor [Source:MGI Symbol;Acc:MGI:1913961]	66711	P70122
ENSMUSG00000032434	3095.14	2496.95	3693.33	1.47914	0.564754	0.000337775	0.0136504	9	114560184	114578412	+	3440	Cmtm6	GO:0003674;GO:0005768;GO:0005886;GO:0005886;GO:0005886;GO:0015031;GO:0015031;GO:0015031;GO:0016020;GO:0016020;GO:0016021;GO:0016021;GO:0031647;GO:0031647;GO:0031647;GO:0031901;GO:0031901;GO:0031901;GO:0032456;GO:0032456;GO:0032456;GO:0043231;GO:0043231;GO:0055038;GO:0055038;GO:0055038;	-	-	V	KOG4788;0A4KB;13PQE;1B4NE;1D0MA;0DR62;0UUMS;0VFFI;192SN	CKLF-like MARVEL transmembrane domain containing 6 [Source:MGI Symbol;Acc:MGI:2447165]	67213	Q9CZ69
ENSMUSG00000018340	3681.69	3027.71	4335.66	1.43199	0.518024	0.00033931	0.0136504	11	54869934	54924271	-	2930	Anxa6	GO:0001755;GO:0001778;GO:0001786;GO:0003418;GO:0005262;GO:0005509;GO:0005509;GO:0005525;GO:0005525;GO:0005525;GO:0005544;GO:0005544;GO:0005544;GO:0005544;GO:0005544;GO:0005634;GO:0005737;GO:0005737;GO:0005737;GO:0005739;GO:0005765;GO:0005765;GO:0005829;GO:0005925;GO:0006816;GO:0006937;GO:0006937;GO:0008289;GO:0008289;GO:0014704;GO:0015276;GO:0015276;GO:0015276;GO:0015485;GO:0015485;GO:0015485;GO:…	K17094	-	U	09XNR;1B2SE;12NA8;0DPW7;1CWTB;0V4Z8;KOG0819;0UP0V;191J7	annexin A6 [Source:MGI Symbol;Acc:MGI:88255]	11749	P14824;Q3UI56
ENSMUSG00000017561	2976.97	2336.33	3617.61	1.54842	0.630795	0.00033959	0.0136504	11	79937319	79971817	-	4261	Crlf3	GO:0000082;GO:0000082;GO:0003677;GO:0005634;GO:0005737;GO:0005737;GO:0005829;GO:0005886;GO:0030308;GO:0030308;GO:0042802;GO:0045893;GO:0045893;GO:0045944;GO:0045944;GO:0046427;GO:0046427;GO:0071158;GO:0071158;GO:0000082;GO:0000082;GO:0003677;GO:0005634;GO:0005737;GO:0005737;GO:0005829;GO:0005886;GO:0030308;GO:0030308;GO:0042802;GO:0045893;GO:0045893;GO:0045944;GO:0045944;GO:0046427;GO:0046427;GO:…	K24482	-	K	1CXAU;0A0SH;0II83;1B0V2;0DN88;18T9U;0UP5H;132VC;0VBNS	cytokine receptor-like factor 3 [Source:MGI Symbol;Acc:MGI:1860086]	54394	Q9Z2L7
ENSMUSG00000031701	5462.12	4499.93	6424.31	1.42765	0.513639	0.000339872	0.0136504	8	86264262	86281973	-	2975	Dnaja2	GO:0001671;GO:0001671;GO:0001671;GO:0005524;GO:0005634;GO:0005829;GO:0005829;GO:0005829;GO:0006457;GO:0009408;GO:0016020;GO:0031072;GO:0032781;GO:0042026;GO:0042026;GO:0046872;GO:0051082;GO:0051082;GO:0051082;GO:0051087;GO:0051087;	K09503	-	O	0UM7F;0DIN9;18XKN;0V62A;1AWPH;12NR7;KOG0712;1CTD5;09UMX	DnaJ heat shock protein family (Hsp40) member A2 [Source:MGI Symbol;Acc:MGI:1931882]	56445	Q9QYJ0
ENSMUSG00000027219	2511.96	1369.05	3654.87	2.66963	1.41664	0.000343348	0.0137519	2	122256958	122291618	+	4208	Slc28a2	GO:0001895;GO:0001895;GO:0005326;GO:0005337;GO:0005337;GO:0005337;GO:0005345;GO:0005415;GO:0005415;GO:0005415;GO:0005886;GO:0005887;GO:0005887;GO:0005887;GO:0006836;GO:0012506;GO:0015211;GO:0015211;GO:0015213;GO:0015293;GO:0015389;GO:0015855;GO:0015860;GO:0015862;GO:0016020;GO:0016020;GO:0016021;GO:0030135;GO:0031526;GO:0032238;GO:0034394;GO:0035340;GO:0072531;GO:1901642;GO:1901642;GO:1901642;GO:…	K11536	-	P	1CQTG;0UHQW;KOG3747;18ZRN;09UUI;0V5U1;0DG3V;1B123;12NJF	solute carrier family 28 (sodium-coupled nucleoside transporter), member 2 [Source:MGI Symbol;Acc:MGI:1913105]	269346	O88627
ENSMUSG00000020589	5759.54	4754.44	6764.65	1.42281	0.50874	0.000346304	0.0138321	12	12312140	12430966	+	12596	Cyria	GO:0003674;GO:0008150;GO:0016020;GO:0030833;GO:0003674;GO:0008150;GO:0016020;GO:0030833;GO:0003674;GO:0008150;GO:0016020;GO:0030833;	-	-	S	KOG3951;1956Z;09WCM;0DHMW;12N7E;0UJVE;1CSCB;1AVCD;0V7B3	CYFIP related Rac1 interactor A [Source:MGI Symbol;Acc:MGI:1261783]	76820	Q8BHZ0
ENSMUSG00000045427	2360.4	1926.53	2794.27	1.45042	0.536467	0.000350438	0.0138836	X	133501928	133507809	+	4369	Hnrnph2	GO:0003676;GO:0003723;GO:0003723;GO:0005634;GO:0005654;GO:0005654;GO:0005654;GO:0005829;GO:0014069;GO:0043484;GO:1990904;GO:1990904;GO:0003676;GO:0003723;GO:0003723;GO:0005634;GO:0005654;GO:0005654;GO:0005654;GO:0005829;GO:0014069;GO:0043484;GO:1990904;GO:1990904;GO:0003676;GO:0003723;GO:0003723;GO:0005634;GO:0005654;GO:0005654;GO:0005654;GO:0005654;GO:0005829;GO:0005829;GO:0014069;GO:0014069;GO:…	K12898	-	A	KOG4211;0DJM2;0V954;1CXV0;191KC;09Y7K;12TR5;1AYUM;0US9Q	heterogeneous nuclear ribonucleoprotein H2 [Source:MGI Symbol;Acc:MGI:1201779]	56258	P70333
ENSMUSG00000027010	1380.22	990.58	1769.87	1.7867	0.837297	0.000350577	0.0138836	2	71101407	71198093	-	7342	Slc25a12	GO:0005313;GO:0005313;GO:0005313;GO:0005313;GO:0005509;GO:0005509;GO:0005509;GO:0005509;GO:0005739;GO:0005739;GO:0005739;GO:0005743;GO:0005743;GO:0006537;GO:0010907;GO:0015183;GO:0015183;GO:0015183;GO:0015183;GO:0015810;GO:0015810;GO:0015810;GO:0015810;GO:0015813;GO:0015813;GO:0015813;GO:0015813;GO:0016020;GO:0016021;GO:0022857;GO:0031643;GO:0042802;GO:0042802;GO:0042802;GO:0043209;GO:0043490;GO:…	K15105	-	C	1CTA9;1AWJZ;0VA5P;12PEP;0UM4A;18WCS;KOG0751;09Z8B;0DIJM	solute carrier family 25 (mitochondrial carrier, Aralar), member 12 [Source:MGI Symbol;Acc:MGI:1926080]	78830	Q8BH59
ENSMUSG00000020091	571.831	697.553	446.11	0.639535	-0.644904	0.000350639	0.0138836	10	61264270	61288440	-	5784	Eif4ebp2	GO:0005515;GO:0005737;GO:0006417;GO:0006446;GO:0007613;GO:0008190;GO:0008190;GO:0008190;GO:0008286;GO:0017148;GO:0019933;GO:0030371;GO:0031929;GO:0035176;GO:0045947;GO:0045947;GO:0045947;GO:0048167;GO:0050804;GO:0098794;GO:0098794;GO:0005515;GO:0005737;GO:0006417;GO:0006446;GO:0007613;GO:0008190;GO:0008190;GO:0008190;GO:0008286;GO:0017148;GO:0019933;GO:0030371;GO:0031929;GO:0035176;GO:0045947;GO:…	K18644	-	J	0J2Z0;1932T;13WGN;1B5H9;0UUZF;0A6NE;0VIV1;0DTN3;1D2ZN	eukaryotic translation initiation factor 4E binding protein 2 [Source:MGI Symbol;Acc:MGI:109198]	13688	P70445;Q3UFP6
ENSMUSG00000078921	1499.18	566.202	2432.15	4.29556	2.10284	0.000351422	0.0138836	11	48948021	48955033	-	2938	Tgtp2	GO:0000166;GO:0002376;GO:0003924;GO:0003924;GO:0003924;GO:0005525;GO:0005525;GO:0005737;GO:0005783;GO:0005789;GO:0005794;GO:0006952;GO:0006955;GO:0009615;GO:0009617;GO:0016020;GO:0016787;GO:0034341;GO:0035455;GO:0035458;GO:0035458;GO:0045087;	-	-	S	0VBXP;13J01;0DQAB;0A2NU;0IJSM	T cell specific GTPase 2 [Source:MGI Symbol;Acc:MGI:3710083]	100039796	Q62293;Q3T9E4
ENSMUSG00000039497	5674.34	4684.77	6663.92	1.42247	0.508393	0.000353669	0.0139344	10	34027389	34083711	-	4980	Dse	GO:0005654;GO:0005783;GO:0005794;GO:0005829;GO:0015012;GO:0016020;GO:0016021;GO:0016853;GO:0030204;GO:0030205;GO:0030206;GO:0030208;GO:0047757;GO:0047757;GO:0047757;GO:0016853;GO:0016853;	K01794	EC:5.1.3.19	G	12NM9;0V585;18XCS;1B2K8;0IKEY;0DFIR;0UGWR;1CQ8H;09U90	dermatan sulfate epimerase [Source:MGI Symbol;Acc:MGI:2443455]	212898	Q8BLI4
ENSMUSG00000042228	11506.3	9523.9	13488.6	1.41629	0.50212	0.000357038	0.014029	4	3678115	3813122	+	4073	Lyn	GO:0000166;GO:0001782;GO:0001817;GO:0001933;GO:0001934;GO:0001934;GO:0002250;GO:0002376;GO:0002431;GO:0002431;GO:0002513;GO:0002513;GO:0002553;GO:0002553;GO:0002576;GO:0002576;GO:0002762;GO:0002768;GO:0002774;GO:0002902;GO:0002902;GO:0004672;GO:0004672;GO:0004713;GO:0004713;GO:0004713;GO:0004713;GO:0004713;GO:0004713;GO:0004715;GO:0004715;GO:0005102;GO:0005102;GO:0005102;GO:0005128;GO:0005161;GO:…	K05854	EC:2.7.10.2	T	0UNKM;195ZK;KOG0197;0DJSM;1AWSY;09YCT;12R3M;1CUJR;0V5FJ	LYN proto-oncogene, Src family tyrosine kinase [Source:MGI Symbol;Acc:MGI:96892]	17096	P25911;Q3TCS3;Q8CEI0
ENSMUSG00000070427	613.698	408.395	819.002	2.00542	1.0039	0.000368372	0.0144333	7	101664092	101667897	-	3026	Il18bp	GO:0005576;GO:0005615;GO:0005615;GO:0042007;GO:0042007;GO:0042007;GO:0042007;GO:0042088;GO:0042088;GO:0042088;GO:0005576;GO:0005615;GO:0005615;GO:0042007;GO:0042007;GO:0042007;GO:0042007;GO:0042088;GO:0042088;GO:0042088;GO:0042007;GO:0042007;	-	-	S;W;T	1ATQJ;1969F;13UK3;0UIH3;0A6VC;0VHPG;1D1US;0DTU1;0J0UT	interleukin 18 binding protein [Source:MGI Symbol;Acc:MGI:1333800]	16068	Q9Z0M9
ENSMUSG00000027555	2712.25	2224.56	3199.93	1.43846	0.524525	0.000369458	0.0144333	3	14706787	14728062	+	2299	Car13	GO:0004089;GO:0004089;GO:0004089;GO:0004089;GO:0005737;GO:0005829;GO:0005829;GO:0006730;GO:0008270;GO:0016829;GO:0016836;GO:0043209;GO:0043231;GO:0046872;	K01672	EC:4.2.1.1	P	1CV4N;13HPY;18UQ4;0VC0Y;KOG0382;0UGEK;0A14P;0DNSM;1B4H3	carbonic anhydrase 13 [Source:MGI Symbol;Acc:MGI:1931322]	71934	Q9D6N1
ENSMUSG00000020132	1774.38	1444.76	2104.01	1.45631	0.542316	0.000370315	0.0144333	10	115122989	115151499	-	5047	Rab21	GO:0000139;GO:0000166;GO:0003924;GO:0003924;GO:0003924;GO:0003924;GO:0003924;GO:0005515;GO:0005515;GO:0005525;GO:0005525;GO:0005525;GO:0005525;GO:0005768;GO:0005768;GO:0005768;GO:0005769;GO:0005783;GO:0005789;GO:0005794;GO:0005802;GO:0005802;GO:0006886;GO:0007165;GO:0008089;GO:0008089;GO:0008089;GO:0009898;GO:0009898;GO:0010008;GO:0012505;GO:0012506;GO:0012506;GO:0015031;GO:0016020;GO:0016020;GO:…	K07890	-	U	1CU7K;192A8;KOG0088;09Y24;1AY0C;0DJF2;12PP2;0UMM4;0V8ZK	RAB21, member RAS oncogene family [Source:MGI Symbol;Acc:MGI:894308]	216344	P35282;Q0PD35
ENSMUSG00000073489	7454.01	4138.15	10769.9	2.60258	1.37994	0.000374482	0.0145566	1	173574859	173594509	-	3561	Ifi204	GO:0000122;GO:0000978;GO:0001227;GO:0002218;GO:0002218;GO:0003690;GO:0003690;GO:0003712;GO:0005515;GO:0005515;GO:0005634;GO:0005634;GO:0005654;GO:0005730;GO:0005730;GO:0005730;GO:0005737;GO:0005829;GO:0006357;GO:0007275;GO:0008134;GO:0009617;GO:0009617;GO:0016607;GO:0032731;GO:0035457;GO:0035458;GO:0035458;GO:0035458;GO:0042405;GO:0042771;GO:0042802;GO:0045669;GO:0048839;	K20914	-	K	1CTDT;0UM8D;0DINX;0J5NP;194Q0;1B2J8;1408X;0V89T;09XBF	interferon activated gene 204 [Source:MGI Symbol;Acc:MGI:96429]	15951	P0DOV2
ENSMUSG00000036905	3829.9	2390.18	5269.63	2.20471	1.14059	0.000377011	0.0146157	4	136607440	136613498	-	1088	C1qb	GO:0002376;GO:0005576;GO:0005581;GO:0005602;GO:0005615;GO:0006958;GO:0006958;GO:0045087;GO:0045202;GO:0045202;GO:0048839;GO:0098794;GO:0098883;	K03987	-	W	13Q2U;0US5A;0DNTU;0A160;1B279;0IWVM;18TG7;1CR1Y;0VC23	complement component 1, q subcomponent, beta polypeptide [Source:MGI Symbol;Acc:MGI:88224]	12260	P14106
ENSMUSG00000009035	2709.33	2104.6	3314.07	1.57468	0.655057	0.000380509	0.014712	15	79244884	79287769	-	4702	Tmem184b	GO:0016020;GO:0016021;GO:0016021;GO:0016020;GO:0016021;GO:0016021;GO:0016020;GO:0016021;GO:0016020;GO:0016021;GO:0016020;GO:0016021;	-	-	T	12QDI;0UPGG;09VK2;0DGUN;0V6J6;18Y0Y;1AUYY;KOG2641;1CRIS	transmembrane protein 184b [Source:MGI Symbol;Acc:MGI:2445179]	223693	Q8BG09
ENSMUSG00000041238	1132.76	911.339	1354.19	1.48593	0.57137	0.000386497	0.0149038	18	11766333	11878278	+	12521	Rbbp8	GO:0000014;GO:0000014;GO:0000082;GO:0000403;GO:0000406;GO:0000724;GO:0000724;GO:0001103;GO:0001835;GO:0003677;GO:0003684;GO:0003684;GO:0003690;GO:0003697;GO:0003714;GO:0004518;GO:0004519;GO:0004519;GO:0005634;GO:0005634;GO:0005654;GO:0005654;GO:0005694;GO:0006281;GO:0006281;GO:0006974;GO:0007049;GO:0010792;GO:0010792;GO:0010792;GO:0016787;GO:0017053;GO:0032355;GO:0035861;GO:0042802;GO:0043231;GO:…	K20773	EC:3.1.-.-	K;B	18Y2F;09VS1;1ARE3;0UJ0N;0IJ39;0DH0K;13FN3;1CRQW;0V6QZ	retinoblastoma binding protein 8, endonuclease [Source:MGI Symbol;Acc:MGI:2442995]	225182	Q80YR6
ENSMUSG00000059878	280.861	353.814	207.908	0.587618	-0.767049	0.000387978	0.0149174	6	116600977	116605960	-	3625	Zfp422	GO:0000122;GO:0000978;GO:0001227;GO:0003677;GO:0003677;GO:0005634;GO:0005634;GO:0005634;GO:0005654;GO:0005654;GO:0005654;GO:0006355;GO:0006357;GO:0042476;GO:0046872;GO:0000122;GO:0000978;GO:0001227;GO:0003677;GO:0003677;GO:0005634;GO:0005634;GO:0005654;GO:0005654;GO:0006355;GO:0006357;GO:0042476;GO:0046872;GO:0000122;GO:0000978;GO:0001227;GO:0003677;GO:0003677;GO:0005634;GO:0005634;GO:0005654;GO:…	-	-	K	18ST0;0DH6A;0UFYV;13IPJ;KOG1721;1ARSY;1D0U3;0VDMA;0A418	zinc finger protein 422 [Source:MGI Symbol;Acc:MGI:1914505]	67255	Q9ERU3;Q3U7F6
ENSMUSG00000046836	3333.11	2743.3	3922.93	1.43	0.516017	0.000388907	0.0149174	1	183057916	183078813	-	5010	Brox	GO:0003674;GO:0008150;GO:0016020;GO:0003674;GO:0008150;GO:0016020;	-	-	S	0IEDQ;0DEJ8;0V46Z;09T81;1AREB;1CP93;12SS3;18WWJ;0UFI3	BRO1 domain and CAAX motif containing [Source:MGI Symbol;Acc:MGI:1918928]	71678	Q8K2Q7
ENSMUSG00000054203	3106.04	1562.84	4649.24	2.97486	1.57282	0.000390904	0.0149544	1	173839564	173859376	-	4177	Ifi205	GO:0000122;GO:0000978;GO:0001227;GO:0002218;GO:0002218;GO:0003690;GO:0003690;GO:0005634;GO:0005634;GO:0005654;GO:0005730;GO:0005730;GO:0005829;GO:0008134;GO:0009617;GO:0009617;GO:0032731;GO:0035458;GO:0035458;GO:0035458;GO:0042802;	-	-	K	1CTDT;0UM8D;0DINX;0J5NP;194Q0;1B2J8;1408X;0V89T;09XBF	interferon activated gene 205 [Source:MGI Symbol;Acc:MGI:101847]	226695	Q8CGE8
ENSMUSG00000028859	4082.42	3213.63	4951.21	1.54069	0.623579	0.000393017	0.0149957	4	125918343	125938233	+	3609	Csf3r	GO:0004896;GO:0004896;GO:0005515;GO:0007155;GO:0009897;GO:0016020;GO:0016020;GO:0016021;GO:0019221;GO:0019955;GO:0030593;GO:0043235;GO:0045637;GO:0051916;GO:0051916;GO:0097186;GO:0004896;GO:0004896;GO:0005515;GO:0007155;GO:0009897;GO:0016020;GO:0016020;GO:0016021;GO:0019221;GO:0019955;GO:0030593;GO:0043235;GO:0045637;GO:0051916;GO:0051916;	K05061	-	W;T	0A2DW;0DHDI;0IGHT;13MK0;0UTBH;1B1C7;1CZ1U;0VD9H;191N0	colony stimulating factor 3 receptor (granulocyte) [Source:MGI Symbol;Acc:MGI:1339755]	12986	P40223
ENSMUSG00000051495	357.327	467.289	247.366	0.529364	-0.917668	0.000405686	0.0154384	8	127315035	127320725	-	5080	Irf2bp2	GO:0000122;GO:0000122;GO:0002327;GO:0002327;GO:0002327;GO:0003714;GO:0003714;GO:0003714;GO:0005634;GO:0005634;GO:0005634;GO:0005634;GO:0005654;GO:0005654;GO:0005737;GO:0006357;GO:0046872;	K22383	-	K	1DF2X;0B44G;0IPPD;0V31B;1975M;13CK7;0WGKI;0E83T;1BAXF	interferon regulatory factor 2 binding protein 2 [Source:MGI Symbol;Acc:MGI:2443921]	270110	E9Q1P8
ENSMUSG00000034640	1947.7	1272.88	2622.52	2.06031	1.04286	0.000409143	0.0155292	3	65435831	65462939	+	4358	Tiparp	GO:0000987;GO:0000987;GO:0001570;GO:0001822;GO:0003950;GO:0003950;GO:0003950;GO:0005634;GO:0005634;GO:0005634;GO:0006471;GO:0006471;GO:0006807;GO:0008209;GO:0008210;GO:0008585;GO:0009791;GO:0010629;GO:0010629;GO:0016740;GO:0016757;GO:0030097;GO:0045732;GO:0045732;GO:0046872;GO:0046872;GO:0048008;GO:0048705;GO:0048745;GO:0060021;GO:0060325;GO:0070213;GO:0070213;GO:0070213;GO:0071407;GO:0071407;GO:…	K15259	EC:2.4.2.30	S;D;K	13KSZ;1CWM5;1921M;0UQZ7;0DMRI;0IIZH;1B15M;0A05J;0VB1R	TCDD-inducible poly(ADP-ribose) polymerase [Source:MGI Symbol;Acc:MGI:2159210]	99929	Q8C1B2
ENSMUSG00000032712	2264.7	1663.23	2866.18	1.72326	0.785144	0.000411653	0.0155837	6	149210912	149237161	+	9629	Resf1	GO:0000930;GO:0005634;GO:0009617;GO:0045869;GO:0090309;GO:1990226;GO:0000930;GO:0005634;GO:0009617;GO:0045869;GO:0090309;GO:1990226;GO:0000930;GO:0005634;GO:0009617;GO:0045869;GO:0090309;GO:1990226;	-	-	S	0DQXY;1D1KK;13753;0UNZQ;1916V;0VFIU;0IKK4;0A4VN;1B47A	retroelement silencing factor 1 [Source:MGI Symbol;Acc:MGI:1914496]	67246	Q5DTW7;B2KFD2
ENSMUSG00000004952	6799.45	5635.85	7963.04	1.41293	0.498685	0.000419889	0.0158225	5	136112770	136140714	+	7485	Rasa4	GO:0005096;GO:0005096;GO:0005096;GO:0005543;GO:0005737;GO:0005829;GO:0005829;GO:0005886;GO:0005886;GO:0007165;GO:0016020;GO:0034260;GO:0035556;GO:0043087;GO:0043547;GO:0046580;GO:0046872;GO:0071277;GO:0071277;GO:0005096;GO:0005096;GO:0005096;GO:0005543;GO:0005737;GO:0005829;GO:0005829;GO:0005886;GO:0005886;GO:0007165;GO:0016020;GO:0034260;GO:0035556;GO:0043087;GO:0043547;GO:0046580;GO:0046872;GO:…	K17630	-	T	KOG2059;13IZY;0V7E6;09V18;0DH3Q;0UHSC;1CRTX;18U0A;1AVXI	RAS p21 protein activator 4 [Source:MGI Symbol;Acc:MGI:1858600]	54153	Q6PFQ7
ENSMUSG00000025010	181.652	127.801	235.503	1.84272	0.88184	0.000420723	0.0158225	19	40819723	40837016	+	4355	Ccnj	GO:0000079;GO:0000307;GO:0005634;GO:0005737;GO:0005813;GO:0016538;GO:0044772;GO:0000079;GO:0000307;GO:0005634;GO:0005737;GO:0005813;GO:0016538;GO:0044772;	-	-	D	0IEPY;0UJ5J;0VBIE;12PIE;18UYG;0A0N8;0DH41;1CRU9;1AX21	cyclin J [Source:MGI Symbol;Acc:MGI:2443297]	240665	Q3TZI6
ENSMUSG00000041390	7649.11	5276.53	10021.7	1.89929	0.925463	0.000421235	0.0158225	6	15720660	15802168	+	7427	Mdfic	GO:0005515;GO:0005634;GO:0005634;GO:0005634;GO:0005730;GO:0005730;GO:0005737;GO:0005737;GO:0005737;GO:0007257;GO:0008134;GO:0008134;GO:0008134;GO:0030111;GO:0030332;GO:0030332;GO:0030957;GO:0030957;GO:0042308;GO:0045892;GO:0045892;GO:0045893;GO:0045893;GO:0050434;GO:0050434;GO:0050434;GO:0007257;GO:0008134;GO:0030111;GO:0030332;GO:0030957;GO:0045893;GO:0050434;GO:0005515;GO:0005634;GO:0005634;GO:…	-	-	K	0V8DW;18SET;1CTIM;1B4CX;13IF2;0IKRS;0UG4D;0DIT9;09XFQ	MyoD family inhibitor domain containing [Source:MGI Symbol;Acc:MGI:104611]	16543	Q8BX65
ENSMUSG00000041481	204.142	67.5037	340.781	5.04833	2.33581	0.000424248	0.0158945	12	104202504	104208198	+	2105	Serpina3g	GO:0005615;GO:0005615;	K04525	-	V	KOG2392	serine (or cysteine) peptidase inhibitor, clade A, member 3G [Source:MGI Symbol;Acc:MGI:105046]	20715	Q5I2A0;Q3U0Y1
ENSMUSG00000021102	202.502	260.57	144.434	0.554299	-0.851264	0.000430968	0.0161047	12	104998947	105009165	+	3682	Glrx5	GO:0015035;GO:0055114;GO:0005634;GO:0005634;GO:0005739;GO:0005739;GO:0005739;GO:0005759;GO:0005759;GO:0005759;GO:0005759;GO:0015035;GO:0030097;GO:0030425;GO:0030425;GO:0043025;GO:0043025;GO:0044571;GO:0044571;GO:0046872;GO:0051536;GO:0051537;GO:0055114;GO:0106034;GO:0106034;GO:0106035;GO:0106035;	K07390	-	O	1D3CU;1B5FP;193X9;KOG0911;13R0U;0UUZ2;0VJ92;0A8IC;0DU12	glutaredoxin 5 [Source:MGI Symbol;Acc:MGI:1920296]	73046	Q80Y14
ENSMUSG00000038181	1233.77	1468.88	998.646	0.679868	-0.556674	0.000432582	0.0161234	5	24791739	24799554	+	5588	Chpf2	GO:0005794;GO:0008376;GO:0008376;GO:0016020;GO:0016021;GO:0016740;GO:0030206;GO:0032580;GO:0032580;GO:0047238;GO:0005794;GO:0008376;GO:0008376;GO:0016020;GO:0016021;GO:0016740;GO:0030206;GO:0032580;GO:0032580;GO:0047238;GO:0005794;GO:0008376;GO:0008376;GO:0016020;GO:0016021;GO:0016740;GO:0030206;GO:0032580;GO:0032580;GO:0047238;	K03419	EC:2.4.1.226	S;U	KOG3708;12QI2;0DNP4;0VBXY;09WXU;0URWD;18X1T;1D0YM;1B4YH	chondroitin polymerizing factor 2 [Source:MGI Symbol;Acc:MGI:1917522]	100910	Q3UU43
ENSMUSG00000040774	3094.32	2228.57	3960.07	1.77696	0.829408	0.000434418	0.0161503	3	106409576	106455118	-	3116	Cept1	GO:0004142;GO:0004142;GO:0004307;GO:0004307;GO:0005634;GO:0005783;GO:0005789;GO:0005789;GO:0005789;GO:0005794;GO:0006629;GO:0006646;GO:0006646;GO:0006656;GO:0006656;GO:0006657;GO:0008654;GO:0008654;GO:0016020;GO:0016020;GO:0016021;GO:0016740;GO:0016780;GO:0016780;GO:0031965;GO:0046872;GO:0004142;GO:0004142;GO:0004307;GO:0004307;GO:0005634;GO:0005783;GO:0005789;GO:0005789;GO:0005789;GO:0005794;GO:…	K13644	-	I	09TDZ;0DER4;0UFRI;12Q0M;KOG2877;18Y1Z;0V4D2;1AUR4;1CPEX	choline/ethanolaminephosphotransferase 1 [Source:MGI Symbol;Acc:MGI:2139793]	99712	Q8BGS7
ENSMUSG00000024659	15886.9	13221	18552.9	1.40328	0.488808	0.000439875	0.0163033	19	20350792	20368308	-	2911	Anxa1	GO:0001533;GO:0001780;GO:0001780;GO:0001891;GO:0002250;GO:0002376;GO:0002548;GO:0002548;GO:0002685;GO:0002685;GO:0003697;GO:0003727;GO:0004859;GO:0005509;GO:0005509;GO:0005509;GO:0005515;GO:0005543;GO:0005544;GO:0005544;GO:0005544;GO:0005544;GO:0005576;GO:0005615;GO:0005615;GO:0005615;GO:0005634;GO:0005634;GO:0005654;GO:0005737;GO:0005737;GO:0005737;GO:0005768;GO:0005768;GO:0005769;GO:0005829;GO:…	K17091	-	U	0US2P;1CXNX;1B27I;0A13F;0VBZQ;136MM;0DNRI;KOG0819;18Z4F	annexin A1 [Source:MGI Symbol;Acc:MGI:96819]	16952	P10107;Q4FJV4
ENSMUSG00000026222	5055.06	3257.28	6852.84	2.10385	1.07303	0.000440781	0.0163033	1	85577709	85637719	+	7556	Sp100	GO:0000723;GO:0000981;GO:0003677;GO:0003677;GO:0005515;GO:0005634;GO:0005634;GO:0005634;GO:0005634;GO:0005737;GO:0006357;GO:0010596;GO:0016605;GO:0016605;GO:0030870;GO:0045765;GO:0046826;GO:1902041;GO:1902044;GO:0005634;GO:0005634;GO:0000723;GO:0000981;GO:0003677;GO:0003677;GO:0005515;GO:0005634;GO:0005634;GO:0005634;GO:0005634;GO:0005737;GO:0006357;GO:0010596;GO:0016605;GO:0016605;GO:0030870;GO:…	K15413	-	O;K	KOG2177;1D0GQ;13UYR;0A4TK;1B35S;0UUA4;0DRB8;193RF;0VFNG	nuclear antigen Sp100 [Source:MGI Symbol;Acc:MGI:109561]	20684	O35892;Q8BNW8
ENSMUSG00000058099	1499.47	1835.84	1163.11	0.633558	-0.658452	0.000444078	0.0163446	15	82877174	82917507	-	7970	Nfam1	GO:0001819;GO:0004888;GO:0004888;GO:0004888;GO:0004888;GO:0005886;GO:0007165;GO:0007165;GO:0009986;GO:0016020;GO:0016021;GO:0016021;GO:0016021;GO:0016021;GO:0016021;GO:0030183;GO:0035556;GO:0035556;GO:0045121;GO:0045121;GO:0045577;GO:0045577;GO:0050853;GO:0050853;GO:0050861;GO:0050861;GO:0051091;GO:0051091;GO:0001819;GO:0004888;GO:0004888;GO:0004888;GO:0004888;GO:0005886;GO:0007165;GO:0007165;GO:…	-	-	T	193IK;0DRHV;0VESY;1B4W8;0A3Y2;13WFS;1D0QC;0J2TX;0UN39	Nfat activating molecule with ITAM motif 1 [Source:MGI Symbol;Acc:MGI:1921289]	74039	Q8R4V1
ENSMUSG00000005949	311.741	389.762	233.72	0.599647	-0.737813	0.000444154	0.0163446	11	73074422	73089868	-	3391	Ctns	GO:0002088;GO:0005764;GO:0005764;GO:0005765;GO:0005765;GO:0005765;GO:0005770;GO:0005774;GO:0005886;GO:0006749;GO:0007420;GO:0007616;GO:0007625;GO:0007628;GO:0008542;GO:0010730;GO:0010918;GO:0015184;GO:0015184;GO:0015811;GO:0015811;GO:0016020;GO:0016021;GO:0042438;GO:0042470;GO:0043231;GO:0045111;GO:0046034;GO:0050890;GO:1903427;GO:0002088;GO:0005764;GO:0005764;GO:0005764;GO:0005765;GO:0005765;GO:…	K12386	-	E	0UR34;KOG3145;0VC17;1CXQ3;190AK;12TEP;0A14Z;0DNSV;1AWAK	cystinosis, nephropathic [Source:MGI Symbol;Acc:MGI:1932872]	83429	P57757;Q542U5
ENSMUSG00000031897	2466.22	1920.83	3011.61	1.56787	0.648808	0.000446011	0.0163714	8	106662367	106665076	-	1705	Psmb10	GO:0000502;GO:0000902;GO:0002376;GO:0004175;GO:0004175;GO:0004298;GO:0004298;GO:0005634;GO:0005634;GO:0005654;GO:0005737;GO:0005737;GO:0005829;GO:0005839;GO:0005839;GO:0005839;GO:0005839;GO:0006508;GO:0008233;GO:0010499;GO:0016787;GO:0019774;GO:0042098;GO:0043161;GO:0051603;GO:1990111;	K02733	EC:3.4.25.1	O	1B4QV;KOG0173;09UF2;18UXV;12SP3;0DFQT;0UNHW;0V5EB;1CQEF	proteasome (prosome, macropain) subunit, beta type 10 [Source:MGI Symbol;Acc:MGI:1096380]	19171	O35955
ENSMUSG00000079363	603.372	183.044	1023.7	5.59264	2.48353	0.000452928	0.0165833	5	105263633	105287452	-	7494	Gbp4	GO:0000122;GO:0001933;GO:0003924;GO:0003924;GO:0005515;GO:0005525;GO:0005525;GO:0031397;GO:0031410;GO:0032687;GO:0042308;GO:0042832;GO:0050688;GO:0050830;GO:0071346;GO:0071346;GO:0000122;GO:0001933;GO:0003924;GO:0003924;GO:0005515;GO:0005525;GO:0005525;GO:0005794;GO:0031397;GO:0031410;GO:0032687;GO:0042308;GO:0042832;GO:0050688;GO:0050830;GO:0071346;GO:0071346;GO:0000122;GO:0001933;GO:0003924;GO:…	K20908	-	O;T;D;C;K	0V9BC;134KU;09XSJ;KOG2037;0DJTQ	guanylate binding protein 4 [Source:MGI Symbol;Acc:MGI:97072]	17472	A4UUI3
ENSMUSG00000038607	19.7908	33.761	5.82065	0.172407	-2.53611	0.000455051	0.0166191	4	59035088	59041903	+	1314	Gng10	GO:0005834;GO:0005834;GO:0005834;GO:0005834;GO:0005886;GO:0007165;GO:0007186;GO:0007186;GO:0016020;GO:0031680;GO:0031681;GO:0031681;	K04545	-	T	0A9I6;0UWFQ;1D4ZA;KOG4119;0DVP1;13VID;0VKFF;1B6PD;1942C	guanine nucleotide binding protein (G protein), gamma 10 [Source:MGI Symbol;Acc:MGI:1336169]	14700	Q9CXP8
ENSMUSG00000053846	320.502	105.659	535.345	5.06673	2.34105	0.000456641	0.0166353	18	75072393	75094334	-	4715	Lipg	GO:0004465;GO:0004465;GO:0004620;GO:0004620;GO:0004620;GO:0004806;GO:0004806;GO:0004806;GO:0004806;GO:0005576;GO:0005615;GO:0005615;GO:0005615;GO:0005615;GO:0005769;GO:0005769;GO:0005794;GO:0005794;GO:0006629;GO:0006629;GO:0006633;GO:0007584;GO:0008201;GO:0008283;GO:0008283;GO:0008970;GO:0008970;GO:0008970;GO:0009986;GO:0009986;GO:0010983;GO:0010983;GO:0016042;GO:0016042;GO:0016298;GO:0016787;GO:…	K22284	EC:3.1.1.3	I;G	0V43M;0UFDU;0IJUA;09YV0;12SVP;0DEG1;18YFJ;1AZIZ;1CP5Q	lipase, endothelial [Source:MGI Symbol;Acc:MGI:1341803]	16891	Q9WVG5;C0LQ91;Q3UDI6;Q3U5K0;Q3U713;Q3U807
ENSMUSG00000025017	29082.1	24241.9	33922.2	1.39932	0.484725	0.000459077	0.0166821	19	41260816	41373541	-	5572	Pik3ap1	GO:0005102;GO:0005515;GO:0005515;GO:0005737;GO:0005737;GO:0005829;GO:0005829;GO:0005886;GO:0005886;GO:0014068;GO:0016020;GO:0034122;GO:0034134;GO:0034142;GO:0034154;GO:0034162;GO:0036312;GO:0036312;GO:0042802;GO:0050727;	K12230	-	T	18UX6;13KN1;0UHCY;09UKF;1CQJH;0IKKC;0DFW6;1AU9M;0V5JU	phosphoinositide-3-kinase adaptor protein 1 [Source:MGI Symbol;Acc:MGI:1933177]	83490	Q9EQ32
ENSMUSG00000036995	12.6557	2.06661	23.2448	11.2478	3.49157	0.000465326	0.0168285	4	135933676	135972527	+	4225	Asap3	GO:0001726;GO:0001726;GO:0001726;GO:0001726;GO:0005096;GO:0005096;GO:0005096;GO:0005096;GO:0005096;GO:0005654;GO:0005654;GO:0005737;GO:0005829;GO:0005829;GO:0005925;GO:0005925;GO:0005925;GO:0005925;GO:0005925;GO:0016477;GO:0016477;GO:0016477;GO:0016477;GO:0043231;GO:0043231;GO:0043231;GO:0043547;GO:0043547;GO:0043547;GO:0043547;GO:0046872;GO:0051492;GO:0051492;GO:0051492;GO:0051492;	K12488	-	T	0VAFY;0DM25;13N44;1ASMH;0UGYA;18XER;KOG0521;1CVX5;09ZIZ	ArfGAP with SH3 domain, ankyrin repeat and PH domain 3 [Source:MGI Symbol;Acc:MGI:2684986]	230837	Q5U464
ENSMUSG00000055200	123.893	82.023	165.763	2.02094	1.01503	0.000465427	0.0168285	7	27173193	27176789	+	1329	Sertad3	GO:0005515;GO:0005634;GO:0005634;GO:0005634;GO:0005634;GO:0005737;GO:0006355;GO:0006355;GO:0006355;GO:0006355;GO:0030308;GO:0030308;GO:0045893;GO:0045893;	-	-	K	0A4QZ;194XH;0JAJA;141CF;0DS74;1B3MR;0UT1C;0VFJX;1D1G9	SERTA domain containing 3 [Source:MGI Symbol;Acc:MGI:2180697]	170742	Q9ERC3;Q3UYB0
ENSMUSG00000028613	141.331	186.676	95.9864	0.514188	-0.959632	0.000469656	0.0169392	4	107659066	107734037	+	12689	Lrp8	GO:0005509;GO:0006897;GO:0016020;GO:0016021;GO:0005509;GO:0006897;GO:0016020;GO:0016021;GO:0001540;GO:0005041;GO:0005509;GO:0005515;GO:0005515;GO:0005515;GO:0005515;GO:0005576;GO:0005615;GO:0005875;GO:0005886;GO:0005886;GO:0005901;GO:0006897;GO:0006897;GO:0007268;GO:0008035;GO:0009986;GO:0014069;GO:0016020;GO:0016020;GO:0016021;GO:0019894;GO:0021517;GO:0021541;GO:0021541;GO:0021766;GO:0021819;GO:…	K20052	-	T	0IPT5	low density lipoprotein receptor-related protein 8, apolipoprotein e receptor [Source:MGI Symbol;Acc:MGI:1340044]	16975	F6YZZ8
ENSMUSG00000068735	36.5935	16.4982	56.6888	3.43606	1.78076	0.000473673	0.0170417	2	93017893	93032104	+	3690	Trp53i11	GO:0003674;GO:0005575;GO:0008150;GO:0016020;GO:0016021;GO:0016020;GO:0016021;GO:0003674;GO:0005575;GO:0008150;GO:0016020;GO:0016021;	-	-	S	12TTZ;1CVUV;09Z4T;0VAED;0UQ2T;0DM01;1AUDT;0IV8J;190HW	transformation related protein 53 inducible protein 11 [Source:MGI Symbol;Acc:MGI:2670995]	277414	Q4QQM4
ENSMUSG00000020476	3115.98	2570.47	3661.49	1.42445	0.510401	0.000475579	0.0170679	11	5738488	5750962	+	2346	Dbnl	GO:0000139;GO:0001726;GO:0002102;GO:0002250;GO:0002376;GO:0003779;GO:0003779;GO:0003779;GO:0005515;GO:0005515;GO:0005737;GO:0005737;GO:0005768;GO:0005769;GO:0005794;GO:0005829;GO:0005856;GO:0005884;GO:0005886;GO:0005886;GO:0005938;GO:0005938;GO:0006897;GO:0006898;GO:0007416;GO:0007416;GO:0008022;GO:0014069;GO:0014069;GO:0014069;GO:0016020;GO:0016601;GO:0019904;GO:0030027;GO:0030027;GO:0030027;GO:…	K20520	-	Z	KOG3655;18UAZ;0V4YJ;0DF9K;1ATCK;13MNJ;09TZQ;0UGHD;1CPZ7	drebrin-like [Source:MGI Symbol;Acc:MGI:700006]	13169	Q62418
ENSMUSG00000040522	3834.22	2576.09	5092.35	1.97678	0.983151	0.000482095	0.017259	X	166025692	166047325	-	3586	Tlr8	GO:0001774;GO:0001932;GO:0002224;GO:0002224;GO:0002376;GO:0002755;GO:0003677;GO:0003677;GO:0003677;GO:0003677;GO:0003723;GO:0003725;GO:0003725;GO:0003725;GO:0003727;GO:0003727;GO:0003727;GO:0004888;GO:0005515;GO:0005768;GO:0005886;GO:0006954;GO:0006954;GO:0006955;GO:0007165;GO:0007249;GO:0007249;GO:0007249;GO:0008144;GO:0009615;GO:0009615;GO:0009897;GO:0009897;GO:0010008;GO:0016020;GO:0016021;GO:…	K10170	-	T	0DPQE;09X81;1CXIA;1AZ7Q;0UT1F;0VCXS;13DH5;KOG4641;190HF	toll-like receptor 8 [Source:MGI Symbol;Acc:MGI:2176887]	170744	P58682
ENSMUSG00000029561	7385.2	5281.3	9489.1	1.79674	0.845378	0.000484503	0.0173025	5	115034997	115050295	+	6374	Oasl2	GO:0000166;GO:0001730;GO:0001730;GO:0001730;GO:0001730;GO:0002376;GO:0003723;GO:0003725;GO:0003725;GO:0003725;GO:0003725;GO:0005524;GO:0005654;GO:0005829;GO:0006164;GO:0009615;GO:0016020;GO:0016740;GO:0016779;GO:0016779;GO:0045071;GO:0045087;GO:0046872;GO:0051607;GO:0051607;GO:0051607;GO:0060700;GO:0001730;GO:0003725;GO:0051607;GO:0001730;GO:0003725;GO:0016779;GO:0051607;GO:0001730;GO:0003725;GO:…	K14608	-	H;J;O	0DF4M;0V4TK;1CP6T;KOG0001;0UR6E;1B7D6;09TUC;12QYV	2'-5' oligoadenylate synthetase-like 2 [Source:MGI Symbol;Acc:MGI:1344390]	23962	Q9Z2F2
ENSMUSG00000040253	5611	3554.97	7667.03	2.15671	1.10883	0.000498121	0.0177451	3	142236103	142255910	+	5614	Gbp7	GO:0003924;GO:0003924;GO:0005525;GO:0005525;GO:0005794;GO:0020005;GO:0031410;GO:0031410;GO:0042832;GO:0042832;GO:0044406;GO:0050830;GO:0050830;GO:0071346;GO:0071346;GO:0003924;GO:0003924;GO:0005525;GO:0005525;GO:0005794;GO:0020005;GO:0031410;GO:0031410;GO:0042832;GO:0042832;GO:0044406;GO:0050830;GO:0050830;GO:0071346;GO:0071346;	K20899	-	S;O;T;D;C;K	191WI;0V9BC;134KU;09XSJ;1AYRV;KOG2037;1CUKV;0UNNF;0DJTQ	guanylate binding protein 7 [Source:MGI Symbol;Acc:MGI:2444421]	229900	Q91Z40
ENSMUSG00000028245	250.275	184.226	316.325	1.71705	0.779934	0.000499483	0.01775	4	6396207	6454271	-	8368	Nsmaf	GO:0005123;GO:0016230;GO:0016230;GO:0043065;GO:0043065;GO:0050790;	K18953	-	T;U	18Z7M;KOG1786;0UGK2;0DGUF;0V6J0;09VJV;12T16;1AY7D;1CRIJ	neutral sphingomyelinase (N-SMase) activation associated factor [Source:MGI Symbol;Acc:MGI:1341864]	18201	O35242
ENSMUSG00000043131	8264.16	6875.37	9652.95	1.40399	0.489533	0.000501683	0.0177846	6	83302998	83320758	+	4794	Mob1a	GO:0005654;GO:0005654;GO:0005730;GO:0005730;GO:0005829;GO:0005829;GO:0035329;GO:0035329;GO:0046872;GO:0005654;GO:0005730;GO:0005829;GO:0035329;GO:0046872;GO:0005654;GO:0005730;GO:0005829;GO:0035329;GO:0046872;	K06685	-	D	0DND0;1CXA5;KOG0440;0A0RR;12T21;1B44E;0VBN3;0UPH9;18XHN	MOB kinase activator 1A [Source:MGI Symbol;Acc:MGI:2442631]	232157	Q921Y0
ENSMUSG00000063800	633.584	421.559	845.608	2.00591	1.00425	0.00050737	0.0179067	4	108420369	108436533	-	5298	Prpf38a	GO:0000398;GO:0000398;GO:0000398;GO:0005634;GO:0005634;GO:0005634;GO:0005654;GO:0005654;GO:0005681;GO:0006397;GO:0008380;GO:0031965;GO:0071005;GO:0071005;GO:0071005;GO:0071011;GO:0071011;GO:0071011;GO:0071011;	K12849	-	A	09VS4;0V6R2;1AVIZ;0DHT3;1CSHG;12S0A;0UK2I;KOG2889;194JT	PRP38 pre-mRNA processing factor 38 (yeast) domain containing A [Source:MGI Symbol;Acc:MGI:1916962]	230596	Q4FK66;B2RTE3
ENSMUSG00000038301	7349.38	5906.46	8792.3	1.48859	0.573946	0.000507598	0.0179067	6	51500881	51567659	+	9300	Snx10	GO:0001696;GO:0005545;GO:0005545;GO:0005545;GO:0005634;GO:0005634;GO:0005634;GO:0005737;GO:0005768;GO:0005783;GO:0005783;GO:0005783;GO:0005813;GO:0005813;GO:0005813;GO:0005815;GO:0005856;GO:0006886;GO:0006897;GO:0007032;GO:0007032;GO:0007032;GO:0008289;GO:0010008;GO:0015031;GO:0016020;GO:0030030;GO:0030141;GO:0030316;GO:0031313;GO:0031313;GO:0031313;GO:0035091;GO:0035630;GO:0044691;GO:0045453;GO:…	K17924	-	U	0UN80;192EM;1D181;12PUM;KOG2527;1B3VR;0A4G6;0VFB4;0DHE5	sorting nexin 10 [Source:MGI Symbol;Acc:MGI:1919232]	71982	Q9CWT3;Q4FJX6;Q3UBN7
ENSMUSG00000052085	1705.17	1394.63	2015.7	1.44532	0.531391	0.000514653	0.0181115	19	24976898	25179796	+	10070	Dock8	GO:0001771;GO:0005085;GO:0005085;GO:0005085;GO:0005085;GO:0005515;GO:0005737;GO:0005737;GO:0005737;GO:0005886;GO:0007264;GO:0016020;GO:0031252;GO:0031256;GO:0031256;GO:0031258;GO:0036336;GO:0036336;GO:0042995;GO:0043547;GO:0043547;GO:0061485;GO:0061485;GO:0070233;GO:1903905;GO:1903905;GO:1903905;GO:1990869;GO:1990869;GO:2000406;GO:2000406;GO:2000406;	K21852	-	T	1BAP0;13B5E;0B38P;19714;1DEJP;KOG1997;0V2PV;0WFKS;0E7J7	dedicator of cytokinesis 8 [Source:MGI Symbol;Acc:MGI:1921396]	76088	Q8C147
ENSMUSG00000024613	1475.78	1202.73	1748.82	1.45403	0.540061	0.000522109	0.0183295	18	60946827	60982043	-	5266	Tcof1	GO:0001650;GO:0005654;GO:0005730;GO:0005829;GO:0006417;GO:0014029;GO:0014032;GO:0030674;GO:0046982;GO:0097110;GO:0001650;GO:0005634;GO:0005654;GO:0005730;GO:0005730;GO:0005730;GO:0005829;GO:0006417;GO:0006417;GO:0014029;GO:0014029;GO:0014032;GO:0014032;GO:0030674;GO:0042790;GO:0042790;GO:0046982;GO:0097110;GO:0097110;	K14562	-	S;K	0UKF1;13M4B;0DP9K;18UBV;0VCH5;1CVC8;1B2T9;0A1ME;0IF55	treacle ribosome biogenesis factor 1 [Source:MGI Symbol;Acc:MGI:892003]	21453	O08784;Q6PFZ6
ENSMUSG00000014470	331.819	412.443	251.196	0.609044	-0.715381	0.000529204	0.0185336	8	123192886	123202803	-	1985	Rnf166	GO:0000209;GO:0002376;GO:0005737;GO:0006511;GO:0006914;GO:0016567;GO:0016740;GO:0045087;GO:0046872;GO:0061630;	K17044	-	O	1905Z;0DM3A;1AYEX;0IIQT;0A29T;0V9UR;0UNUK;1CYXH;131P9	ring finger protein 166 [Source:MGI Symbol;Acc:MGI:1915968]	68718	Q3U9F6;A2RS02
ENSMUSG00000020585	5406.97	4491.08	6322.87	1.40787	0.493519	0.000537292	0.0187587	12	8971664	8988742	+	1773	Laptm4a	GO:0005765;GO:0005794;GO:0016020;GO:0016021;GO:0016021;GO:0031902;	K12387	-	U	13I9K;194AB;0A1BN;0VC76;0DH8W;1CRYX;0USB9;1AUCP;0IEGH	lysosomal-associated protein transmembrane 4A [Source:MGI Symbol;Acc:MGI:108017]	17775	Q8BG66;E9QLR3
ENSMUSG00000049659	2537.75	1819.18	3256.31	1.78999	0.839951	0.000538218	0.0187587	11	20635084	20691589	-	6979	Aftph	GO:0005654;GO:0005654;GO:0005737;GO:0005794;GO:0005794;GO:0005829;GO:0005829;GO:0015031;GO:0030121;GO:0030121;GO:0030121;GO:0030276;GO:0030276;GO:0030276;GO:0032588;GO:0043231;GO:0043231;GO:0046907;GO:0005654;GO:0005737;GO:0005794;GO:0005829;GO:0015031;GO:0030121;GO:0030121;GO:0030276;GO:0030276;GO:0032588;GO:0043231;GO:0046907;	-	-	S;U	0V55G;18UA1;1AZBC;13KFN;1CQ5U;0UGSF;0IIS8;09U6G;0DFG3	aftiphilin [Source:MGI Symbol;Acc:MGI:1923012]	216549	Q80WT5
ENSMUSG00000016831	1923.52	1578.74	2268.31	1.43678	0.522843	0.000546468	0.0190006	14	52516603	52533858	+	6950	Tox4	GO:0000781;GO:0000781;GO:0000785;GO:0000785;GO:0000785;GO:0003677;GO:0005634;GO:0005634;GO:0006357;GO:0031490;GO:0072357;GO:0072357;GO:0072357;GO:0072357;	-	-	K	0UKBU;0V7NJ;191IB;1AWEJ;KOG0381;09WQ2;0DHZS;1CSQE;13IIY	TOX high mobility group box family member 4 [Source:MGI Symbol;Acc:MGI:1915389]	268741	Q8BU11;Q6A006;Q3UVQ1
ENSMUSG00000033880	9960.87	7331.5	12590.2	1.71728	0.780126	0.000554139	0.0191885	11	118283577	118292918	-	2847	Lgals3bp	GO:0005044;GO:0005044;GO:0005515;GO:0005576;GO:0005615;GO:0005615;GO:0005615;GO:0005615;GO:0006897;GO:0007155;GO:0016020;GO:0005044;GO:0006897;GO:0016020;	K17300	-	S;W	0IY2Y;13R25;0DRYZ;09XHI;1B0QE;0URG8;1D26B;0VFVW;192E5	lectin, galactoside-binding, soluble, 3 binding protein [Source:MGI Symbol;Acc:MGI:99554]	19039	Q07797
ENSMUSG00000009585	340.767	258.938	422.596	1.63204	0.706674	0.000555289	0.0191885	15	79775860	79800107	+	9454	Apobec3	GO:0000932;GO:0002244;GO:0002376;GO:0003723;GO:0003824;GO:0004126;GO:0005515;GO:0005634;GO:0005634;GO:0005654;GO:0005737;GO:0005737;GO:0008270;GO:0009972;GO:0010529;GO:0010529;GO:0010529;GO:0016554;GO:0016787;GO:0016787;GO:0045071;GO:0045087;GO:0045869;GO:0046872;GO:0047844;GO:0047844;GO:0050688;GO:0051607;GO:0051607;GO:0051607;GO:0070383;GO:0080111;GO:1903900;GO:0003824;GO:0008270;GO:0016787;GO:…	K18750	EC:3.5.4.-	A;L	1B5F1;0V5M1;0JBA1;1CQKM;1437H;192YC;09UMG;0UHEZ;0DFX9	apolipoprotein B mRNA editing enzyme, catalytic polypeptide 3 [Source:MGI Symbol;Acc:MGI:1933111]	80287	-
ENSMUSG00000034613	1383.4	1127.67	1639.13	1.45355	0.539579	0.000555983	0.0191885	10	122514667	122781700	+	10226	Ppm1h	GO:0004721;GO:0004721;GO:0004722;GO:0004722;GO:0004724;GO:0005634;GO:0005634;GO:0005654;GO:0005737;GO:0005737;GO:0006470;GO:0006470;GO:0016787;GO:0016791;GO:0042802;GO:0045202;GO:0098978;GO:0106306;GO:0106307;GO:0004721;GO:0004721;GO:0004721;GO:0004722;GO:0004722;GO:0004724;GO:0005634;GO:0005634;GO:0005634;GO:0005654;GO:0005654;GO:0005737;GO:0005737;GO:0005737;GO:0006470;GO:0006470;GO:0016787;GO:…	K17503	EC:3.1.3.16	T	0USGN;09XQ6;19542;0DJ21;0V8CS;KOG1323;1CTTM;1B0PV;13HDW	protein phosphatase 1H (PP2C domain containing) [Source:MGI Symbol;Acc:MGI:2442087]	319468	Q3UYC0
ENSMUSG00000029163	315.307	392.559	238.056	0.606421	-0.721608	0.000557166	0.0191885	5	31070746	31078621	+	4937	Emilin1	GO:0003180;GO:0005515;GO:0005515;GO:0005576;GO:0005576;GO:0005581;GO:0005615;GO:0005615;GO:0005615;GO:0007155;GO:0007160;GO:0007160;GO:0010628;GO:0010629;GO:0010811;GO:0016477;GO:0016477;GO:0016525;GO:0030023;GO:0030023;GO:0030023;GO:0030198;GO:0030512;GO:0030948;GO:0031012;GO:0032966;GO:0034668;GO:0034668;GO:0042802;GO:0042802;GO:0048251;GO:0050866;GO:0060394;GO:0062023;GO:0062023;GO:0062023;GO:…	K24246	-	W	0V4G9;0DEU2;09TH9;12QJG;0IKJ2;1AYGF;1CPHU;0UFVH;190XJ	elastin microfibril interfacer 1 [Source:MGI Symbol;Acc:MGI:1926189]	100952	Q99K41
ENSMUSG00000027669	1459.4	798.92	2119.87	2.65342	1.40785	0.00057193	0.0196503	3	32634481	32670734	-	12692	Gnb4	GO:0003924;GO:0005737;GO:0005834;GO:0005834;GO:0007165;GO:0007165;GO:0007186;GO:0007186;GO:0031682;GO:0043209;GO:0044297;GO:0044877;GO:0003924;GO:0005737;GO:0005834;GO:0005834;GO:0007165;GO:0007165;GO:0007186;GO:0007186;GO:0031682;GO:0043209;GO:0044297;GO:0044877;GO:0007165;	K04538	-	S;T	12NUC;1AT1I;1926T;1CQKF;0V5KU;KOG0286;09UMA;0UHEQ;0DFX3	guanine nucleotide binding protein (G protein), beta 4 [Source:MGI Symbol;Acc:MGI:104581]	14696	P29387
ENSMUSG00000029178	2400.81	1979.06	2822.56	1.42621	0.512185	0.000574658	0.0196973	5	64960731	64990244	+	11243	Klf3	GO:0000122;GO:0000785;GO:0000977;GO:0000978;GO:0000981;GO:0001227;GO:0003677;GO:0003677;GO:0005634;GO:0005654;GO:0005654;GO:0006357;GO:0046872;GO:1901653;GO:1990837;GO:1990837;GO:0000122;GO:0000785;GO:0000977;GO:0000978;GO:0000981;GO:0001227;GO:0003677;GO:0003677;GO:0005634;GO:0005654;GO:0006357;GO:0046872;GO:1990837;	K15605	-	K	0UQRQ;0DQFZ;13IJW;1B38N;1CZI1;0VDPG;18VXW;KOG1721;0A2TU	Kruppel-like factor 3 (basic) [Source:MGI Symbol;Acc:MGI:1342773]	16599	Q60980;Q545J5
ENSMUSG00000057596	1854.58	665.816	3043.34	4.57084	2.19246	0.000586282	0.0200483	7	104119221	104157056	-	3758	Trim30d	GO:0000209;GO:0005654;GO:0005737;GO:0005829;GO:0010468;GO:0010508;GO:0016567;GO:0019901;GO:0032880;GO:0042803;GO:0043123;GO:0045087;GO:0046596;GO:0051092;GO:0061630;GO:0000209;GO:0005634;GO:0005654;GO:0005737;GO:0005737;GO:0005829;GO:0008270;GO:0010468;GO:0010508;GO:0016567;GO:0019901;GO:0032880;GO:0042803;GO:0043123;GO:0045087;GO:0046596;GO:0046872;GO:0046872;GO:0051092;GO:0061630;GO:0000209;GO:…	K10648	EC:2.3.2.27	O;K	0B6AK;0WJ0G;13FYK;1DGAS;1BBGY;197FW;0E9FG;0ITFH;0V3TY	tripartite motif-containing 30D [Source:MGI Symbol;Acc:MGI:3035181]	209387	Q3TNW3
ENSMUSG00000039285	3059.26	2265.84	3852.69	1.70034	0.765822	0.00058896	0.0200925	9	117869567	117898862	+	6439	Azi2	GO:0000278;GO:0005515;GO:0005737;GO:0005737;GO:0005737;GO:0007249;GO:0007249;GO:0042110;GO:0044565;GO:0097028;GO:0000278;GO:0005515;GO:0005737;GO:0005737;GO:0005737;GO:0007249;GO:0007249;GO:0042110;GO:0044565;GO:0097028;GO:0000278;GO:0005515;GO:0005737;GO:0005737;GO:0005737;GO:0007249;GO:0007249;GO:0042110;GO:0044565;GO:0097028;GO:0000278;GO:0005515;GO:0005737;GO:0005737;GO:0005737;GO:0007249;GO:…	K12651	-	Z;T	0IG4Z;18YPH;1CVQA;0VAA0;1B0FR;0DKV9;0UNBB;09ZCZ;12RWX	5-azacytidine induced gene 2 [Source:MGI Symbol;Acc:MGI:1351332]	27215	Q9QYP6
ENSMUSG00000033487	6031.42	3778.04	8284.79	2.19288	1.13283	0.000590943	0.0201129	14	72775386	72947443	-	9944	Fndc3a	GO:0000139;GO:0001669;GO:0005794;GO:0005794;GO:0005829;GO:0007286;GO:0009566;GO:0012506;GO:0016020;GO:0016021;GO:0031410;GO:0060009;GO:0098609;GO:0016020;GO:0016021;	K24485	-	S	09UFN;0IE8R;1AU7Q;1CUHA;0DFRC;18U5H;0UNH4;0V5F0;12NQX	fibronectin type III domain containing 3A [Source:MGI Symbol;Acc:MGI:1196463]	319448	Q8BX90
ENSMUSG00000045404	269.822	338.531	201.113	0.594075	-0.751283	0.000596854	0.0202665	12	99930758	100028941	+	3112	Kcnk13	GO:0005244;GO:0005267;GO:0005267;GO:0005887;GO:0006811;GO:0006813;GO:0016020;GO:0016020;GO:0016021;GO:0016021;GO:0022841;GO:0030322;GO:0034765;GO:0071805;GO:0071805;GO:0071805;GO:0005244;GO:0005267;GO:0005267;GO:0005887;GO:0006811;GO:0006813;GO:0016020;GO:0016020;GO:0016021;GO:0016021;GO:0022841;GO:0030322;GO:0034765;GO:0071805;GO:0071805;GO:0071805;GO:0005244;GO:0005267;GO:0005267;GO:0005887;GO:…	K04922	-	P	0DH2Y;18TAJ;12Y19;0UJ3Y;1CRT7;09VUR;0V6TE;KOG4404;1AUKZ	potassium channel, subfamily K, member 13 [Source:MGI Symbol;Acc:MGI:2384976]	217826	Q8R1P5;Q3TYG8
ENSMUSG00000032350	1893.56	2367.51	1419.61	0.599619	-0.737882	0.000606286	0.0205387	9	77661817	77701767	+	3766	Gclc	GO:0000166;GO:0000287;GO:0000287;GO:0003824;GO:0004357;GO:0004357;GO:0004357;GO:0004357;GO:0004357;GO:0005515;GO:0005515;GO:0005524;GO:0005739;GO:0005829;GO:0006534;GO:0006534;GO:0006536;GO:0006536;GO:0006749;GO:0006750;GO:0006750;GO:0006750;GO:0006750;GO:0006750;GO:0006979;GO:0006979;GO:0006979;GO:0007568;GO:0007584;GO:0009408;GO:0009408;GO:0009410;GO:0009725;GO:0009725;GO:0014823;GO:0016595;GO:…	K11204	EC:6.3.2.2	H	12PR1;18WDB;0DJ25;1CTTR;0V8N0;1B2AE;KOG3754;0UMR1;09TT6	glutamate-cysteine ligase, catalytic subunit [Source:MGI Symbol;Acc:MGI:104990]	14629	P97494;Q3TEF1;Q3UNA7
ENSMUSG00000078763	600.922	182.505	1019.34	5.58528	2.48163	0.000608751	0.0205656	11	83007675	83013496	+	1864	Slfn1	GO:0000122;GO:0001933;GO:0005515;GO:0005634;GO:0005737;GO:0007050;GO:0008285;GO:0042130;GO:1900477;GO:2000134;	K24457	-	-	-	schlafen 1 [Source:MGI Symbol;Acc:MGI:1313259]	20555	Q9Z0I7
ENSMUSG00000056290	72.8633	40.6378	105.089	2.58598	1.37071	0.000612187	0.0205656	19	11420917	11444419	+	8780	Ms4a4b	GO:0005887;GO:0016020;GO:0016021;GO:0016021;GO:0005887;	K22190	-	S	1967A;1AWM6;1CTBK;0DIKP;0UM5X;0VHG7;13UNP;0A6N2;0J084	membrane-spanning 4-domains, subfamily A, member 4B [Source:MGI Symbol;Acc:MGI:1913083]	60361	Q9ES61
ENSMUSG00000044768	1870.39	1417.21	2323.56	1.63953	0.713284	0.000612459	0.0205656	1	97534043	97589799	-	41324	Macir	GO:0003674;GO:0005737;GO:0005737;GO:0005929;GO:0006954;GO:0010764;GO:0010764;GO:0015031;GO:0030030;GO:0035869;GO:0035869;GO:0042995;GO:0050728;GO:0050728;GO:0060271;GO:1900016;GO:1900016;GO:0003674;GO:0005737;GO:0005737;GO:0005929;GO:0006954;GO:0010764;GO:0010764;GO:0015031;GO:0030030;GO:0035869;GO:0035869;GO:0042995;GO:0050728;GO:0050728;GO:0060271;GO:1900016;GO:1900016;GO:0003674;GO:0005737;GO:…	-	-	U	1AS1V;12ND2;0V4SP;1CPTI;18SVQ;0IE29;0UG8Z;0DF3Q;09TTC	macrophage immunometabolism regulator [Source:MGI Symbol;Acc:MGI:1277184]	52392	Q8VEB3
ENSMUSG00000032515	962.827	629.16	1296.49	2.06068	1.04312	0.000613807	0.0205656	9	119800229	119813724	-	3473	Csrnp1	GO:0000981;GO:0001228;GO:0003677;GO:0003700;GO:0005634;GO:0005634;GO:0006355;GO:0006357;GO:0006915;GO:0009791;GO:0043565;GO:0043565;GO:0045944;GO:0048008;GO:0048705;GO:0060021;GO:0060325;GO:0000981;GO:0001228;GO:0003677;GO:0003700;GO:0005634;GO:0005634;GO:0006355;GO:0006357;GO:0006915;GO:0009791;GO:0043565;GO:0043565;GO:0045944;GO:0048008;GO:0048705;GO:0060021;GO:0060325;GO:0000981;GO:0001228;GO:…	K17494	-	K	1CYEK;18ZTQ;0VDSM;0A2XC;1AX0C;13J1M;0UPGF;KOG3813;0DMCF	cysteine-serine-rich nuclear protein 1 [Source:MGI Symbol;Acc:MGI:2387989]	215418	P59054
ENSMUSG00000034218	159.942	109.583	210.3	1.91909	0.940424	0.000614174	0.0205656	9	53350449	53448040	-	10338	Atm	GO:0000077;GO:0000166;GO:0000723;GO:0004674;GO:0004674;GO:0005524;GO:0005634;GO:0006281;GO:0006974;GO:0006974;GO:0016301;GO:0016301;GO:0016310;GO:0016572;GO:0016740;GO:0031410;GO:0106310;GO:0106311;GO:0000077;GO:0000077;GO:0000077;GO:0000166;GO:0000723;GO:0000723;GO:0000724;GO:0000781;GO:0000781;GO:0001541;GO:0001666;GO:0001666;GO:0001756;GO:0002331;GO:0002376;GO:0003677;GO:0004672;GO:0004674;GO:…	K04728	EC:2.7.11.1	B;L	0DP4B;191T2;0A1GK;0VBJ8;12PHZ;1AT6U;1CY2B;KOG0892;0URMQ	ataxia telangiectasia mutated [Source:MGI Symbol;Acc:MGI:107202]	11920	Q62388;B9EHX4
ENSMUSG00000017132	976.252	699.965	1252.54	1.78943	0.839501	0.000616498	0.0205959	11	118022845	118139418	-	3905	Cyth1	GO:0005085;GO:0005737;GO:0005886;GO:0030155;GO:0032012;GO:0032012;GO:0050790;GO:0005085;GO:0005085;GO:0005515;GO:0005737;GO:0005829;GO:0005886;GO:0005886;GO:0005912;GO:0005923;GO:0005923;GO:0008289;GO:0016020;GO:0030054;GO:0031234;GO:0031594;GO:0032012;GO:0050790;GO:0090162;GO:0098888;GO:2000300;GO:0005085;GO:0005085;GO:0005515;GO:0005737;GO:0005829;GO:0005886;GO:0005886;GO:0005912;GO:0005923;GO:…	K18441	-	U	1B423;0V6ES;0UK2C;0DH02;09VFK;12P7W;KOG0930;18SXA;1CRQD	cytohesin 1 [Source:MGI Symbol;Acc:MGI:1334257]	19157	Q9QX11;Q570Y7
ENSMUSG00000034573	17.2988	4.56754	30.0301	6.57467	2.71692	0.00062504	0.0208332	5	103573058	103746169	+	12102	Ptpn13	GO:0031047;GO:0001650;GO:0001933;GO:0004721;GO:0004725;GO:0004725;GO:0004725;GO:0005634;GO:0005654;GO:0005737;GO:0005737;GO:0005829;GO:0005856;GO:0005856;GO:0005886;GO:0006470;GO:0006470;GO:0014066;GO:0016311;GO:0016787;GO:0016791;GO:0030027;GO:0035335;GO:0036312;GO:0043005;GO:0044297;	K02374	-	T	1B2SI;0V6M1;KOG0792;1CRKP;18S8C;0UFJS;13CFY;09VMW;0DGWE	protein tyrosine phosphatase, non-receptor type 13 [Source:MGI Symbol;Acc:MGI:103293]	19249	Q64512;Q3TPD6;Q8BV52;G5E8B1;Q3TTT8
ENSMUSG00000039936	2208.88	1608.85	2808.92	1.74592	0.803983	0.000628241	0.0208919	4	149733625	149787028	-	6259	Pik3cd	GO:0014065;GO:0016301;GO:0016301;GO:0016310;GO:0016740;GO:0035004;GO:0046854;GO:0046934;GO:0048015;GO:0048015;GO:0052812;GO:0010629;GO:0014065;GO:0016301;GO:0016301;GO:0016310;GO:0016740;GO:0035004;GO:0046854;GO:0046934;GO:0048015;GO:0048015;GO:0052812;GO:0014065;GO:0016301;GO:0016301;GO:0016310;GO:0016740;GO:0035004;GO:0046854;GO:0046934;GO:0048015;GO:0048015;GO:0052812;GO:0014065;GO:0016301;GO:…	K00922	EC:2.7.1.153	T	KOG0904;0DIAB;1919M;1CXD8;09WZX;0UJ2B;12QH0;0V7XY;1B1PS	phosphatidylinositol-4,5-bisphosphate 3-kinase catalytic subunit delta [Source:MGI Symbol;Acc:MGI:1098211]	18707	O35904
ENSMUSG00000031822	355.805	270.313	441.297	1.63254	0.707121	0.000636436	0.021116	8	120955195	121308129	+	10351	Gse1	GO:0003674;GO:0005575;GO:0008150;GO:0003674;GO:0005575;GO:0008150;GO:0003674;GO:0005575;GO:0008150;	-	-	S	0DMVI;1ATIY;0VB4U;0IGKK;0UMEM;13MTI;0A08X;18UHZ;1CWR5	genetic suppressor element 1, coiled-coil protein [Source:MGI Symbol;Acc:MGI:1098275]	382034	Q3U3C9
ENSMUSG00000026358	1668.69	788.36	2549.02	3.23331	1.69301	0.000638974	0.0211518	1	144118034	144124980	-	6947	Rgs1	GO:0001965;GO:0001965;GO:0005096;GO:0005096;GO:0005096;GO:0005096;GO:0005737;GO:0005829;GO:0005829;GO:0005829;GO:0005886;GO:0005886;GO:0007165;GO:0007165;GO:0007165;GO:0007186;GO:0007186;GO:0007186;GO:0008277;GO:0009617;GO:0009968;GO:0016020;GO:0031234;GO:0031234;GO:0031234;GO:0043547;GO:0043547;GO:0043547;GO:0061737;GO:0061737;GO:0061737;GO:0005096;GO:0008277;GO:0043547;GO:0005096;GO:0005829;GO:…	K16449	-	T	0UM7T;09ZMP;1CW0J;0DM5F;18WUY;0VAIC;1AVWH;KOG3589;12TYG	regulator of G-protein signaling 1 [Source:MGI Symbol;Acc:MGI:1354694]	50778	Q9JL25
ENSMUSG00000048118	771.61	580.707	962.513	1.65748	0.728995	0.000643806	0.0212632	12	71062764	71145366	+	5615	Arid4a	GO:0000976;GO:0003677;GO:0003677;GO:0003677;GO:0003677;GO:0005634;GO:0005634;GO:0005634;GO:0005654;GO:0005654;GO:0005829;GO:0005829;GO:0005886;GO:0005886;GO:0006325;GO:0006349;GO:0006357;GO:0007283;GO:0007283;GO:0017053;GO:0017053;GO:0030154;GO:0034773;GO:0036124;GO:0045892;GO:0045892;GO:0045944;GO:0048821;GO:0080182;GO:0097368;GO:0003677;GO:0005634;	K19194	-	K;B	KOG3001;1CTJU;0UMG6;18T9E;0DIUH;0V8F1;09XH0;1ASDS;12NVA;KOG2744	AT rich interactive domain 4A (RBP1-like) [Source:MGI Symbol;Acc:MGI:2444354]	238247	F8VPQ2
ENSMUSG00000004359	565.778	446.586	684.97	1.53379	0.617103	0.000647337	0.0212936	10	88510634	88520877	-	3841	Spic	GO:0000978;GO:0000981;GO:0001228;GO:0001824;GO:0003677;GO:0003700;GO:0005634;GO:0005634;GO:0006355;GO:0006357;GO:0030154;GO:0043565;GO:0045944;GO:0045944;GO:0003677;GO:0003700;GO:0006355;GO:0043565;	K09440	-	K	0A1FR;1CYUC;KOG3805;0DPV1;1AZPN;13H91;0UMZP;0VD2P;192QV	Spi-C transcription factor (Spi-1/PU.1 related) [Source:MGI Symbol;Acc:MGI:1341168]	20728	Q6P3D7
ENSMUSG00000022947	342.491	434.708	250.274	0.575728	-0.796541	0.000647662	0.0212936	16	93480103	93487878	+	1254	Cbr3	GO:0000253;GO:0000253;GO:0004090;GO:0004090;GO:0004090;GO:0004090;GO:0004090;GO:0005654;GO:0005654;GO:0005737;GO:0005829;GO:0005829;GO:0016491;GO:0016491;GO:0042376;GO:0042376;GO:0050890;GO:0050890;GO:0055114;GO:0055114;GO:0070402;GO:0070402;GO:0055114;	K00084	EC:1.1.1.184	Q	KOG1208;12Q3D;0V7WD;09WY5;0UT54;1CSZ5;0DI8P;18Z5B;1B59Q	carbonyl reductase 3 [Source:MGI Symbol;Acc:MGI:1309992]	109857	Q8K354
ENSMUSG00000054823	2333.18	1650.9	3015.46	1.82656	0.869128	0.000657635	0.0215725	8	26091617	26209694	+	16219	Nsd3	GO:0000785;GO:0003713;GO:0005634;GO:0005634;GO:0005634;GO:0005634;GO:0005694;GO:0006325;GO:0006355;GO:0008168;GO:0010452;GO:0016571;GO:0016740;GO:0018024;GO:0018024;GO:0032259;GO:0034968;GO:0042800;GO:0045892;GO:0045893;GO:0045893;GO:0046872;GO:0046975;GO:0046976;GO:0051568;GO:0070734;GO:2001255;GO:0000785;GO:0003713;GO:0005634;GO:0005634;GO:0005634;GO:0005634;GO:0005694;GO:0006325;GO:0006355;GO:…	K11425	-	-	-	nuclear receptor binding SET domain protein 3 [Source:MGI Symbol;Acc:MGI:2142581]	234135	Q6P2L6
ENSMUSG00000043953	13087	9697.84	16476.1	1.69894	0.764636	0.000665794	0.0217908	9	110883554	110886587	-	2598	Ccrl2	GO:0004930;GO:0004930;GO:0004950;GO:0005737;GO:0005886;GO:0005887;GO:0005887;GO:0006935;GO:0006954;GO:0006954;GO:0006955;GO:0007165;GO:0007186;GO:0007186;GO:0007204;GO:0009897;GO:0016020;GO:0016021;GO:0016021;GO:0016493;GO:0016493;GO:0019722;GO:0019957;GO:0042379;GO:0042379;GO:0048020;GO:0060326;GO:0070098;GO:0004930;GO:0004930;GO:0004950;GO:0005737;GO:0005886;GO:0005887;GO:0005887;GO:0006935;GO:…	K08373	-	T	0A3FQ;13NJS;194AK;1D07T;0VDFJ;1B049;0IKE4;0DR2W;0UU54	chemokine (C-C motif) receptor-like 2 [Source:MGI Symbol;Acc:MGI:1920904]	54199	O35457
ENSMUSG00000031327	40.3181	19.5548	61.0814	3.12361	1.64321	0.000682648	0.0222898	X	102400082	102439698	+	7375	Chic1	GO:0003674;GO:0005886;GO:0016020;GO:0016021;GO:0031410;	-	-	U	193I1;13Q2H;0A4PQ;KOG4101;0DS61;1D1F0;1B2PD;0UKVX;0VEMF	cysteine-rich hydrophobic domain 1 [Source:MGI Symbol;Acc:MGI:1344694]	12212	Q8CBW7;A2RT09
ENSMUSG00000030107	4145.92	2347.35	5944.49	2.53243	1.34052	0.000684181	0.0222898	6	121222865	121247876	+	2790	Usp18	GO:0004197;GO:0004843;GO:0004843;GO:0005515;GO:0005634;GO:0005634;GO:0005829;GO:0005829;GO:0006508;GO:0006511;GO:0008233;GO:0008234;GO:0009617;GO:0016579;GO:0016579;GO:0016787;GO:0018215;GO:0019785;GO:0035634;GO:0050727;GO:0050727;GO:0004843;GO:0006508;GO:0006511;GO:0008233;GO:0008234;GO:0016579;GO:0016787;GO:0018215;	K11846	EC:3.4.19.12	O	0DH24;KOG1863;09VTS;1CRSB;0V6SI;13J1N;1B2UT;18W92;0UJ2S	ubiquitin specific peptidase 18 [Source:MGI Symbol;Acc:MGI:1344364]	24110	Q9WTV6;Q3UAR6
ENSMUSG00000048621	2526.59	1604.68	3448.49	2.14901	1.10368	0.00068565	0.0222898	X	108240362	108244045	+	2795	Gm6377	GO:0003674;GO:0005575;GO:0034121;GO:0035751;GO:0003674;GO:0005575;GO:0034121;GO:0035751;	-	-	S	0IVMI;1CZX6;0A365;1AU7J;0DQTI;195VU;13IGV;0UQ4U;0VE12	predicted gene 6377 [Source:MGI Symbol;Acc:MGI:3647255]	622976	Q8BHV4
ENSMUSG00000079808	164.943	83.4473	246.44	2.95324	1.5623	0.000689681	0.0223707	GL456212.1	128555	150452	-	1910	AC168977.1	-	-	-	O;K	KOG2177;0UM76;0DIN3;09XAP;193WH;1CTCZ;0V891;13QZ7;1AVSY	sp110 nuclear body protein-like [Source:NCBI gene (formerly Entrezgene);Acc:102638047]	102638047	-
ENSMUSG00000028796	2172.31	1597.77	2746.85	1.71918	0.781717	0.000692905	0.022378	4	128548495	128646674	+	7064	Phc2	GO:0000792;GO:0003677;GO:0003682;GO:0005515;GO:0005515;GO:0005634;GO:0005634;GO:0005634;GO:0005634;GO:0005634;GO:0005654;GO:0005654;GO:0007275;GO:0007283;GO:0008270;GO:0031519;GO:0031519;GO:0035102;GO:0035102;GO:0035102;GO:0042393;GO:0042802;GO:0042802;GO:0045892;GO:0046872;GO:0000792;GO:0003677;GO:0003682;GO:0005515;GO:0005515;GO:0005634;GO:0005634;GO:0005634;GO:0005634;GO:0005654;GO:0007275;GO:…	K11457	-	S	09XN5;0IDZN;1CTRC;1AYIF;0DIZY;1911Q;0V8JW;12QVA;0UMNC	polyhomeotic 2 [Source:MGI Symbol;Acc:MGI:1860454]	54383	Q9QWH1
ENSMUSG00000040552	14232.9	11929.7	16536.2	1.38613	0.471063	0.000692995	0.022378	6	122824097	122833120	-	4305	C3ar1	GO:0001850;GO:0002430;GO:0002430;GO:0002430;GO:0002462;GO:0004875;GO:0004875;GO:0004876;GO:0004876;GO:0004876;GO:0004876;GO:0004930;GO:0004930;GO:0004930;GO:0004930;GO:0004930;GO:0005886;GO:0005886;GO:0005886;GO:0006935;GO:0006935;GO:0006954;GO:0007165;GO:0007186;GO:0007186;GO:0007200;GO:0007204;GO:0007204;GO:0008217;GO:0010575;GO:0010759;GO:0016020;GO:0016021;GO:0016021;GO:0030335;GO:0045766;GO:…	K04009	-	T	0V8M9;0DJ1B;09XPM;1CTST;18VTK;0IUVF;0UG6N;13IP7;1AX6D	complement component 3a receptor 1 [Source:MGI Symbol;Acc:MGI:1097680]	12267	O09047;Q5U7A4
ENSMUSG00000026869	770.593	922.47	618.715	0.670715	-0.576228	0.000700669	0.0225756	2	34739746	34764980	-	7230	Psmd5	GO:0008540;GO:0008540;GO:0022624;GO:0043248;GO:0070682;GO:0070682;GO:0043248;	K06692	-	O	0DGFC;1AZK4;0V663;18ZZ6;12P5D;0UI8G;KOG4413;09V6J;1CR51	proteasome (prosome, macropain) 26S subunit, non- ATPase, 5 [Source:MGI Symbol;Acc:MGI:1914248]	66998	Q8BJY1
ENSMUSG00000073412	276.639	207.428	345.849	1.66732	0.73753	0.000708319	0.0227714	17	35404071	35407415	-	415	Lst1	GO:0000902;GO:0006955;GO:0016020;	-	-	U	0VP09;1D62D;0JN3N;0UX0T;14CJR;0ABH8;0DWUJ	leukocyte specific transcript 1 [Source:MGI Symbol;Acc:MGI:1096324]	16988	B8JJ61
ENSMUSG00000033004	1809.88	1490.92	2128.85	1.42788	0.513877	0.000721904	0.0231568	14	103350847	103584250	-	19364	Mycbp2	GO:0046872;GO:0016567;GO:0030424;GO:0042995;GO:0046872;GO:0005085;GO:0005085;GO:0005085;GO:0005515;GO:0005515;GO:0005515;GO:0005634;GO:0005634;GO:0005634;GO:0005634;GO:0005654;GO:0005654;GO:0005737;GO:0005856;GO:0008045;GO:0008270;GO:0008270;GO:0015630;GO:0016567;GO:0016567;GO:0016567;GO:0016740;GO:0021785;GO:0021952;GO:0021952;GO:0030424;GO:0030424;GO:0031267;GO:0031267;GO:0031267;GO:0031398;GO:…	K10693	EC:2.3.2.33	O;K	KOG1428;1AXW8;09VKQ;0UNCN;0DJ6A;0V6JV;18SCC;1CTY5;12PCZ	MYC binding protein 2, E3 ubiquitin protein ligase [Source:MGI Symbol;Acc:MGI:2179432]	105689	Q7TPH6
ENSMUSG00000066036	11948.5	9771.47	14125.6	1.4456	0.531664	0.000723904	0.0231697	4	139079920	139216899	+	17997	Ubr4	GO:0004842;GO:0005515;GO:0005516;GO:0005634;GO:0005654;GO:0005654;GO:0005654;GO:0005737;GO:0005813;GO:0005813;GO:0005813;GO:0005829;GO:0005829;GO:0005829;GO:0005856;GO:0006511;GO:0006511;GO:0006511;GO:0006511;GO:0008270;GO:0016020;GO:0016021;GO:0016567;GO:0016740;GO:0046872;GO:0061630;GO:0061630;GO:0061630;GO:0004842;GO:0005515;GO:0005516;GO:0005634;GO:0005654;GO:0005654;GO:0005737;GO:0005813;GO:…	K10691	EC:2.3.2.27	O;T	1CQPT;1AS07;0DG09;KOG1776;0UHJU;18WME;12NW4;09UQC;0V5Q0	ubiquitin protein ligase E3 component n-recognin 4 [Source:MGI Symbol;Acc:MGI:1916366]	69116	A2AN08
ENSMUSG00000052776	3735.37	2628.66	4842.08	1.84203	0.8813	0.000727254	0.0231923	5	121034319	121045584	-	1885	Oas1a	GO:0000166;GO:0001730;GO:0001730;GO:0001730;GO:0001730;GO:0002376;GO:0003723;GO:0003725;GO:0003725;GO:0003725;GO:0003725;GO:0005515;GO:0005515;GO:0005515;GO:0005524;GO:0005634;GO:0005634;GO:0005654;GO:0005654;GO:0005737;GO:0005737;GO:0005739;GO:0005783;GO:0005829;GO:0005829;GO:0006164;GO:0009615;GO:0016020;GO:0016740;GO:0016779;GO:0016779;GO:0043231;GO:0045071;GO:0045087;GO:0046872;GO:0048525;GO:…	K14216	EC:2.7.7.84	H;J;O	0DF4M;0V4TK;1CP6T;KOG0001;09TUC;0UM27;1AT0Y;12QYV;18U5V	2'-5' oligoadenylate synthetase 1A [Source:MGI Symbol;Acc:MGI:2180860]	246730	P11928
ENSMUSG00000000982	39372.6	33042.6	45702.5	1.38314	0.467945	0.000727809	0.0231923	11	83538670	83540181	-	766	Ccl3	GO:0000165;GO:0001649;GO:0001775;GO:0002548;GO:0002548;GO:0004672;GO:0004698;GO:0005125;GO:0005515;GO:0005515;GO:0005576;GO:0005576;GO:0005615;GO:0005615;GO:0005615;GO:0005737;GO:0005829;GO:0006468;GO:0006816;GO:0006874;GO:0006887;GO:0006935;GO:0006954;GO:0006954;GO:0006954;GO:0006955;GO:0007010;GO:0007165;GO:0007186;GO:0007204;GO:0007204;GO:0007267;GO:0008009;GO:0008009;GO:0008009;GO:0008009;GO:…	K05408	-	T	196EQ;0UWD3;0DVHK;146RM;1D4YW;1B6KP;0J4I9;0A9HK;0VKER	chemokine (C-C motif) ligand 3 [Source:MGI Symbol;Acc:MGI:98260]	20302	P10855;Q5QNW0
ENSMUSG00000022216	1884.05	1553.18	2214.93	1.42606	0.512038	0.000731976	0.0232739	14	55815580	55818986	+	2209	Psme1	GO:0000502;GO:0008537;GO:0000502;GO:0005515;GO:0005654;GO:0005737;GO:0008537;GO:0010950;GO:0019884;GO:0061133;GO:0061136;GO:2000045;GO:0000502;GO:0008537;GO:0000502;GO:0008537;GO:0000502;GO:0008537;GO:0000502;GO:0008537;	K06696	-	O	0V93Y;1AYCH;0URKE;12SZR;18WIQ;1CX6R;KOG4470;0A0NH;0DN9X	proteasome (prosome, macropain) activator subunit 1 (PA28 alpha) [Source:MGI Symbol;Acc:MGI:1096367]	19186	P97371;Q5HZK3
ENSMUSG00000062190	1306.74	1068.23	1545.25	1.44655	0.532619	0.000735517	0.0233166	6	57679525	57716424	+	3020	Lancl2	GO:0005634;GO:0005634;GO:0005654;GO:0005737;GO:0005829;GO:0005829;GO:0005886;GO:0005886;GO:0005886;GO:0005975;GO:0009789;GO:0010314;GO:0016020;GO:0030864;GO:0032266;GO:0045892;GO:0045892;GO:0070273;GO:0005634;GO:0005634;GO:0005654;GO:0005737;GO:0005829;GO:0005829;GO:0005886;GO:0005886;GO:0005886;GO:0005975;GO:0009789;GO:0010314;GO:0016020;GO:0030864;GO:0032266;GO:0045892;GO:0045892;GO:0070273;GO:…	-	-	V	0DPQQ;0A22S;1D0IV;0UT1S;12PT2;1B0Q9;18TH7;0VCY6;KOG2787	LanC (bacterial lantibiotic synthetase component C)-like 2 [Source:MGI Symbol;Acc:MGI:1919085]	71835	Q9JJK2
ENSMUSG00000074063	543.421	657.385	429.457	0.65328	-0.614226	0.000736533	0.0233166	8	120160863	120172995	+	2674	Osgin1	GO:0030308;GO:0043065;GO:0005575;GO:0007165;GO:0008083;GO:0008083;GO:0008083;GO:0030154;GO:0030308;GO:0030308;GO:0030308;GO:0030308;GO:0030334;GO:0030334;GO:0030334;GO:0040008;GO:0042127;GO:0042127;GO:0042127;GO:0042981;GO:0042981;GO:0042981;GO:0043065;GO:0030308;GO:0043065;GO:0030308;GO:0043065;	-	-	T	0DHDJ;12QIZ;18V9P;09W4G;0UQ2D;0V72U;0IF6I;1B0M1;1CS3T	oxidative stress induced growth inhibitor 1 [Source:MGI Symbol;Acc:MGI:1919089]	71839	Q8VC10
ENSMUSG00000027490	120.702	160.468	80.936	0.504373	-0.987437	0.00075245	0.0237503	2	154401327	154411812	-	3154	E2f1	GO:0000077;GO:0000077;GO:0000077;GO:0000082;GO:0000122;GO:0000122;GO:0000785;GO:0000785;GO:0000785;GO:0000785;GO:0000976;GO:0000978;GO:0000981;GO:0000981;GO:0000981;GO:0000981;GO:0000987;GO:0000987;GO:0001216;GO:0001216;GO:0003677;GO:0003677;GO:0003677;GO:0003700;GO:0003700;GO:0003700;GO:0005515;GO:0005515;GO:0005634;GO:0005634;GO:0005634;GO:0005634;GO:0005654;GO:0005654;GO:0005654;GO:0005667;GO:…	K17454	-	K	0UM8I;13JIB;1AWE3;1CU9X;KOG2577;0DJHG;18S9C;09Y48;0V91Q	E2F transcription factor 1 [Source:MGI Symbol;Acc:MGI:101941]	13555	Q61501;Q547J6;Q9CYB4
ENSMUSG00000021929	10114.4	8148.19	12080.5	1.4826	0.568132	0.000753511	0.0237503	14	61602660	61677323	-	4298	Kpna3	GO:0005634;GO:0005634;GO:0005654;GO:0005737;GO:0005737;GO:0006606;GO:0006607;GO:0008022;GO:0008139;GO:0015031;GO:0061608;GO:0061608;	K23583	-	U	0UQAN;0V809;09X23;18UNC;1CT39;KOG0166;0DICS;12RBS;1B01B	karyopherin (importin) alpha 3 [Source:MGI Symbol;Acc:MGI:1100863]	16648	O35344;Q543M7
ENSMUSG00000029186	641.555	511.364	771.746	1.50919	0.593774	0.000769773	0.0242103	5	52898916	52926682	+	3760	Pi4k2b	GO:0000166;GO:0004430;GO:0004430;GO:0004430;GO:0005524;GO:0005737;GO:0005768;GO:0005802;GO:0005886;GO:0007030;GO:0007032;GO:0016020;GO:0016301;GO:0016310;GO:0016740;GO:0046854;GO:0000166;GO:0004430;GO:0004430;GO:0004430;GO:0005524;GO:0005737;GO:0005768;GO:0005802;GO:0005886;GO:0007030;GO:0007032;GO:0016020;GO:0016301;GO:0016310;GO:0016740;GO:0046854;	K13711	EC:2.7.1.67	T	09UBC;1ATQZ;KOG2381;0V5AI;0DNT6;1CXQG;18UQQ;12NNF;0UI5N	phosphatidylinositol 4-kinase type 2 beta [Source:MGI Symbol;Acc:MGI:1914323]	67073	Q8CBQ5
ENSMUSG00000032508	3274.86	2724.39	3825.34	1.40411	0.489653	0.000781137	0.0245145	9	119165000	119170477	-	2576	Myd88	GO:0002238;GO:0002376;GO:0002755;GO:0002755;GO:0005102;GO:0005102;GO:0005121;GO:0005121;GO:0005149;GO:0005149;GO:0005149;GO:0005515;GO:0005515;GO:0005515;GO:0005515;GO:0005634;GO:0005634;GO:0005634;GO:0005737;GO:0005737;GO:0005737;GO:0005829;GO:0005886;GO:0005886;GO:0006909;GO:0006909;GO:0006909;GO:0006915;GO:0006915;GO:0006954;GO:0006954;GO:0006955;GO:0007165;GO:0007166;GO:0007178;GO:0007254;GO:…	K04729	-	T;K	12SM9;0A237;1CWEU;0UQSF;191S8;0VCYQ;0IIN8;0DFRX;1B0YG	myeloid differentiation primary response gene 88 [Source:MGI Symbol;Acc:MGI:108005]	17874	P22366;Q3U7M4
ENSMUSG00000035692	7182.73	4405.06	9960.4	2.26113	1.17704	0.000784824	0.024577	4	156283912	156285253	-	703	Isg15	GO:0005178;GO:0005178;GO:0005178;GO:0005515;GO:0005515;GO:0005576;GO:0005576;GO:0005576;GO:0005634;GO:0005737;GO:0005737;GO:0007229;GO:0007229;GO:0007229;GO:0009617;GO:0019941;GO:0019941;GO:0022627;GO:0030501;GO:0031386;GO:0031386;GO:0031397;GO:0031397;GO:0031397;GO:0031625;GO:0032020;GO:0032020;GO:0032020;GO:0032020;GO:0032609;GO:0032613;GO:0032649;GO:0032649;GO:0032649;GO:0034340;GO:0034340;GO:…	K12159	-	O	0DTRB;193EP;0UUZS;KOG0001;13VQF;1B5MQ;0VI08;1D338;0A6PP	ISG15 ubiquitin-like modifier [Source:MGI Symbol;Acc:MGI:1855694]	100038882	Q64339;Q4FJR9
ENSMUSG00000031805	642.239	512.596	771.883	1.50583	0.590559	0.000790311	0.0246955	8	72128940	72143219	+	5352	Jak3	GO:0000166;GO:0004672;GO:0004713;GO:0004713;GO:0004715;GO:0004715;GO:0005524;GO:0005524;GO:0005856;GO:0005856;GO:0006468;GO:0016020;GO:0016301;GO:0016310;GO:0016740;GO:0018108;GO:0035556;GO:0000166;GO:0004672;GO:0004713;GO:0004713;GO:0004715;GO:0004715;GO:0005524;GO:0005524;GO:0005856;GO:0005856;GO:0006468;GO:0016020;GO:0016301;GO:0016310;GO:0016740;GO:0018108;GO:0035556;GO:0000166;GO:0004672;GO:…	K11218	EC:2.7.10.2	T	12TI0;190VX;1B535;0UM1R;0V7H4;KOG0197;09WIK;1CT85;0DG6K	Janus kinase 3 [Source:MGI Symbol;Acc:MGI:99928]	16453	Q62137;A0A0R4J0R7
ENSMUSG00000041215	288.641	359.18	218.102	0.607222	-0.719703	0.000792965	0.0247252	16	19959813	20051323	+	11585	Yeats2	GO:0000122;GO:0005634;GO:0005634;GO:0005671;GO:0006355;GO:0017025;GO:0042393;GO:0042393;GO:0043966;GO:0045892;GO:0072686;GO:0140030;GO:0140030;GO:0000122;GO:0000122;GO:0005634;GO:0005634;GO:0005671;GO:0005671;GO:0006355;GO:0017025;GO:0017025;GO:0042393;GO:0042393;GO:0042393;GO:0043966;GO:0043966;GO:0045892;GO:0045892;GO:0072686;GO:0140030;GO:0140030;GO:0140030;GO:0006355;GO:0005634;GO:0006355;GO:…	K24539	-	K;B	KOG3149;1CU2Q;0DJAK;09XXF;18YUP;13ERB;0V8V6;0UMZU;1AY6A	YEATS domain containing 2 [Source:MGI Symbol;Acc:MGI:2447762]	208146	Q3TUF7;B9EKJ4
ENSMUSG00000025862	2653.59	2202.59	3104.6	1.40952	0.495207	0.000796579	0.0247845	X	41238194	41366062	+	8273	Stag2	GO:0000785;GO:0005694;GO:0007062;GO:0008278;GO:0016363;GO:0090307;GO:0097431;GO:0000775;GO:0000785;GO:0000785;GO:0003682;GO:0003682;GO:0005634;GO:0005634;GO:0005654;GO:0005694;GO:0007049;GO:0007059;GO:0007062;GO:0007062;GO:0007062;GO:0008278;GO:0008278;GO:0008278;GO:0016363;GO:0019827;GO:0051301;GO:0051321;GO:0090307;GO:0097431;GO:0000775;GO:0000785;GO:0000785;GO:0003682;GO:0003682;GO:0005634;GO:…	K06671	-	D	1CPR1;KOG2011;0UG5F;0DF16;1ARYJ;0V4Q8;1944F;12N2Q;09TQY	stromal antigen 2 [Source:MGI Symbol;Acc:MGI:1098583]	20843	O35638
ENSMUSG00000104713	1162.94	540.884	1785	3.30015	1.72253	0.000813847	0.0252676	5	105418568	105441564	-	5954	Gbp6	GO:0003924;GO:0003924;GO:0005525;GO:0005525;GO:0009617;GO:0020005;GO:0031410;GO:0031410;GO:0035458;GO:0042832;GO:0042832;GO:0044406;GO:0050830;GO:0050830;GO:0071222;GO:0071346;GO:0071346;GO:0003924;GO:0003924;GO:0005525;GO:0005525;GO:0005794;GO:0009617;GO:0020005;GO:0031410;GO:0031410;GO:0035458;GO:0042832;GO:0042832;GO:0044406;GO:0050830;GO:0050830;GO:0071222;GO:0071346;GO:0071346;	K20908	-	-	-	guanylate binding protein 6 [Source:MGI Symbol;Acc:MGI:2140937]	100702	A0A0G2JDV3;Q3U8G5
ENSMUSG00000006418	3721.16	3103.45	4338.87	1.39808	0.483445	0.000824221	0.025535	2	167334565	167358093	+	3356	Rnf114	GO:0000209;GO:0005634;GO:0005737;GO:0005829;GO:0005829;GO:0005886;GO:0005886;GO:0006511;GO:0007275;GO:0007283;GO:0016567;GO:0016740;GO:0030154;GO:0046872;GO:0061630;GO:0000209;GO:0005634;GO:0005737;GO:0005829;GO:0005886;GO:0006511;GO:0007275;GO:0007283;GO:0016567;GO:0016740;GO:0030154;GO:0046872;GO:0061630;GO:0046872;	K15697	EC:2.3.2.27	O	0A078;0VB37;1CWP2;1B2YC;18YYH;12SKZ;0UFFX;0DMTR;0IEG7	ring finger protein 114 [Source:MGI Symbol;Acc:MGI:1933159]	81018	Q9ET26
ENSMUSG00000043822	391.228	479.045	303.412	0.633368	-0.658885	0.000827255	0.025545	10	80174944	80184246	-	4722	Adamtsl5	GO:0001527;GO:0004222;GO:0005576;GO:0005576;GO:0006508;GO:0008201;GO:0030198;GO:0031012;GO:0031012;GO:0050436;GO:0062023;GO:0001527;GO:0004222;GO:0005576;GO:0005576;GO:0006508;GO:0008201;GO:0030198;GO:0031012;GO:0031012;GO:0050436;	K24432	-	O	1CXT0;1B2RJ;0A17S;0VC3F;0DNVH;0UQNW;18VSZ;12T4J;KOG3538	ADAMTS-like 5 [Source:MGI Symbol;Acc:MGI:1913798]	66548	Q9CRC7;D3Z689
ENSMUSG00000014361	1506.39	990.768	2022.01	2.04085	1.02917	0.000828067	0.025545	2	128540876	128644814	+	4336	Mertk	GO:0000166;GO:0001750;GO:0001750;GO:0001779;GO:0001818;GO:0004672;GO:0004713;GO:0004713;GO:0004714;GO:0004714;GO:0005524;GO:0005524;GO:0005615;GO:0005615;GO:0005737;GO:0005737;GO:0005887;GO:0006468;GO:0006468;GO:0006468;GO:0006909;GO:0006909;GO:0006909;GO:0006909;GO:0007169;GO:0007275;GO:0007283;GO:0007399;GO:0016020;GO:0016021;GO:0016028;GO:0016028;GO:0016301;GO:0016310;GO:0016477;GO:0016740;GO:…	K05117	EC:2.7.10.1	T	13IZU;1AZCJ;18X9J;0DHUI;0V7HR;0IG6I;0UPQB;1CSJ4;09WJ5	MER proto-oncogene tyrosine kinase [Source:MGI Symbol;Acc:MGI:96965]	17289	Q60805
ENSMUSG00000048498	588.871	468.398	709.345	1.51441	0.598752	0.000832602	0.0256235	11	114942743	114953003	-	2088	Cd300e	GO:0002376;GO:0004888;GO:0005886;GO:0005886;GO:0008150;GO:0016020;GO:0016021;	K06719	-	T	196YT;0B1CN;145H6;0JCED;1BAF9;0E6M7;1DDJF;0WDY0;0V1UE	CD300E molecule [Source:MGI Symbol;Acc:MGI:2387602]	217306	Q8K249
ENSMUSG00000030347	275.669	343.757	207.581	0.60386	-0.727715	0.000834145	0.0256235	6	126916925	126952930	+	6784	D6Wsu163e	GO:0003674;GO:0005737;GO:0005737;GO:0005737;GO:0005737;GO:0043304;GO:0043304;GO:0043304;GO:0043304;	-	-	S	0US1E;1CXMQ;19222;0A12C;0DNQC;1398W;1B235;0VBYR;KOG4506	DNA segment, Chr 6, Wayne State University 163, expressed [Source:MGI Symbol;Acc:MGI:107893]	28040	Q91YN0
ENSMUSG00000074519	55.751	80.46	31.0419	0.385805	-1.37406	0.00083996	0.0257475	2	177665077	177675815	+	2145	Zfp971	GO:0000122;GO:0000785;GO:0000977;GO:0000981;GO:0001227;GO:0003674;GO:0005575;GO:0006355;GO:0006357;GO:0008150;GO:0000122;GO:0000785;GO:0000977;GO:0000981;GO:0001227;GO:0006355;GO:0006357;GO:0046872;	-	-	K	KOG1721	zinc finger protein 971 [Source:MGI Symbol;Acc:MGI:1261426]	626848	Q3V498;A2BFG8
ENSMUSG00000026219	7766.08	6401.7	9130.45	1.42625	0.51223	0.000841924	0.0257533	1	84698910	84818237	-	16601	Trip12	GO:0000209;GO:0000209;GO:0004842;GO:0005634;GO:0005654;GO:0005654;GO:0006281;GO:0006511;GO:0006511;GO:0006511;GO:0006974;GO:0006974;GO:0006974;GO:0008270;GO:0016567;GO:0016607;GO:0016607;GO:0016740;GO:0045995;GO:0046966;GO:0061630;GO:0061630;GO:1901315;GO:1901315;GO:1901315;GO:2000779;GO:2000780;GO:2000780;GO:0000209;GO:0000209;GO:0004842;GO:0005634;GO:0005654;GO:0005654;GO:0006281;GO:0006511;GO:…	K10590	EC:2.3.2.26	O;B	0DKBC;KOG0170;0V4MP;0US5N;12NAF;1CV57;1AW4S;09YW5;KOG0168;18Z4V	thyroid hormone receptor interactor 12 [Source:MGI Symbol;Acc:MGI:1309481]	14897	G5E870
ENSMUSG00000026112	4687.04	3918.21	5455.86	1.39244	0.477612	0.000847548	0.0258707	1	37456165	37469184	-	5220	Coa5	GO:0003674;GO:0005739;GO:0005739;GO:0033617;	K18178	-	O	0VK8G;0DVJZ;1D4WD;0UWBI;193VP;0A9DN;KOG4114;13X42;1B6M1	cytochrome C oxidase assembly factor 5 [Source:MGI Symbol;Acc:MGI:1923428]	76178	Q99M07
ENSMUSG00000034765	153.307	97.4099	209.203	2.14766	1.10277	0.000856607	0.0260923	19	53517540	53530862	+	2473	Dusp5	GO:0000188;GO:0001706;GO:0004721;GO:0004721;GO:0004722;GO:0004725;GO:0004725;GO:0005634;GO:0005634;GO:0005737;GO:0006470;GO:0006470;GO:0008138;GO:0008138;GO:0008138;GO:0008330;GO:0016311;GO:0016311;GO:0016311;GO:0016787;GO:0016791;GO:0016791;GO:0016791;GO:0017017;GO:0017017;GO:0017017;GO:0035335;GO:0035335;GO:0035335;GO:0035970;GO:0035970;GO:0035970;GO:0045892;GO:0045906;GO:0051019;GO:0106306;GO:…	K04459	-	V	0DPDW;13MS0;0VCMA;0UKGT;18UUA;0A1RP;1AXUN;1CYBQ;KOG1716	dual specificity phosphatase 5 [Source:MGI Symbol;Acc:MGI:2685183]	240672	Q1HL35
ENSMUSG00000061119	625.14	453.496	796.783	1.75698	0.813095	0.000860791	0.0261648	7	92523678	92583791	+	5497	Prcp	GO:0002155;GO:0002353;GO:0003085;GO:0003085;GO:0004180;GO:0004185;GO:0005764;GO:0005764;GO:0006508;GO:0006508;GO:0006508;GO:0008233;GO:0008236;GO:0008239;GO:0016787;GO:0042593;GO:0043231;GO:0043231;GO:0043535;GO:0043535;GO:0045178;GO:0060055;GO:0060055;GO:0097009;GO:2000377;GO:0006508;GO:0008236;	K01285	EC:3.4.16.2	O	1CU2R;09XXG;KOG2183;13DCP;1AS2Z;0V8V7;18V7D;0DI44;0UG9W	prolylcarboxypeptidase (angiotensinase C) [Source:MGI Symbol;Acc:MGI:1919711]	72461	Q7TMR0
ENSMUSG00000027835	1836.45	1517.63	2155.27	1.42016	0.506051	0.000870362	0.0264004	3	75423797	75464163	-	2939	Pdcd10	GO:0000139;GO:0001525;GO:0005515;GO:0005737;GO:0005737;GO:0005737;GO:0005794;GO:0005794;GO:0005794;GO:0005794;GO:0005794;GO:0005829;GO:0005829;GO:0005829;GO:0005886;GO:0006915;GO:0008284;GO:0008284;GO:0008284;GO:0010628;GO:0010628;GO:0010629;GO:0010629;GO:0016020;GO:0019901;GO:0019901;GO:0019901;GO:0030335;GO:0030335;GO:0032874;GO:0032874;GO:0033138;GO:0033138;GO:0036481;GO:0036481;GO:0042542;GO:…	K18269	-	S;T	KOG4025;1B3KM;1CYY9;0A2NB;190TA;13JC0;0UT8E;0VDI5;0DPYF	programmed cell death 10 [Source:MGI Symbol;Acc:MGI:1928396]	56426	Q8VE70
ENSMUSG00000037580	4922.78	4119.88	5725.68	1.38977	0.474847	0.000899411	0.0272245	14	47391352	47426870	-	6251	Gch1	GO:0000166;GO:0003824;GO:0003924;GO:0003924;GO:0003934;GO:0003934;GO:0003934;GO:0003934;GO:0003934;GO:0003934;GO:0005509;GO:0005509;GO:0005525;GO:0005525;GO:0005525;GO:0005525;GO:0005525;GO:0005634;GO:0005634;GO:0005634;GO:0005654;GO:0005654;GO:0005737;GO:0005737;GO:0005737;GO:0005737;GO:0005829;GO:0005829;GO:0006729;GO:0006729;GO:0006729;GO:0006729;GO:0008152;GO:0008217;GO:0008217;GO:0008270;GO:…	K01495	EC:3.5.4.16	H	1CTUV;18VF5;KOG2698;1AUDU;0V7I8;13HKT;0DJ34;0UKZG;09WJK	GTP cyclohydrolase 1 [Source:MGI Symbol;Acc:MGI:95675]	14528	Q05915;Q3U7P6
ENSMUSG00000029860	2525.12	2099.43	2950.81	1.40553	0.491116	0.000906202	0.027373	6	42326564	42337147	+	5390	Zyx	GO:0001725;GO:0001725;GO:0005515;GO:0005634;GO:0005634;GO:0005737;GO:0005737;GO:0005829;GO:0005856;GO:0005912;GO:0005925;GO:0005925;GO:0005925;GO:0007155;GO:0007160;GO:0007165;GO:0007179;GO:0007179;GO:0007179;GO:0007229;GO:0007229;GO:0007229;GO:0030054;GO:0043149;GO:0045335;GO:0046872;GO:0071346;GO:0046872;GO:0046872;GO:0001725;GO:0001725;GO:0001725;GO:0005515;GO:0005634;GO:0005634;GO:0005634;GO:…	K06273	-	Z;T	09XN2;0UHQ8;KOG1701;1AZ7U;0DIZV;1CTR8;13N9K;0V8JU;18XKF	zyxin [Source:MGI Symbol;Acc:MGI:103072]	22793	Q62523;Q8CBM0
ENSMUSG00000045382	235.223	295.963	174.483	0.589541	-0.762335	0.000910021	0.0274312	1	128515936	128520030	-	1808	Cxcr4	GO:0001666;GO:0001764;GO:0002064;GO:0003779;GO:0004930;GO:0004930;GO:0004950;GO:0005634;GO:0005737;GO:0005764;GO:0005764;GO:0005768;GO:0005768;GO:0005769;GO:0005769;GO:0005770;GO:0005770;GO:0005886;GO:0005886;GO:0005886;GO:0006935;GO:0007165;GO:0007186;GO:0007186;GO:0007186;GO:0008038;GO:0009986;GO:0014823;GO:0016020;GO:0016021;GO:0016021;GO:0016477;GO:0019722;GO:0019955;GO:0019957;GO:0022008;GO:…	K04189	-	T	KOG3656;09XJW;194AW;0V8HU;12PRP;1B2JP;1CTP0;0DIXH;0UIY4	chemokine (C-X-C motif) receptor 4 [Source:MGI Symbol;Acc:MGI:109563]	12767	P70658;A0A0R4J0N8
ENSMUSG00000030583	308.096	381.045	235.148	0.617113	-0.696393	0.000915385	0.0275356	7	29019797	29218066	-	16555	Sipa1l3	GO:0001654;GO:0001725;GO:0001725;GO:0002244;GO:0003382;GO:0003382;GO:0003382;GO:0005096;GO:0005096;GO:0005096;GO:0005654;GO:0005737;GO:0005794;GO:0005794;GO:0005886;GO:0005886;GO:0005886;GO:0007010;GO:0016020;GO:0016324;GO:0045177;GO:0045177;GO:0051056;GO:0061689;GO:0061689;GO:0090162;GO:0090162;GO:0090162;GO:0090630;GO:0001654;GO:0001725;GO:0001725;GO:0001725;GO:0002244;GO:0003382;GO:0003382;GO:…	K17703	-	T	12P2U;18Z3A;09V0S;1CVK8;0DNKT;KOG3686;0V60F;1AU9A;0UG9H	signal-induced proliferation-associated 1 like 3 [Source:MGI Symbol;Acc:MGI:1921456]	74206	G3X9J0
ENSMUSG00000067212	4826.43	3227.55	6425.32	1.99077	0.99333	0.000925363	0.0277781	17	36340665	36343747	-	2889	H2-T23	GO:0001815;GO:0001916;GO:0002250;GO:0002376;GO:0002474;GO:0002476;GO:0002476;GO:0002477;GO:0002489;GO:0002519;GO:0002639;GO:0002715;GO:0002717;GO:0002729;GO:0005102;GO:0005615;GO:0005886;GO:0009897;GO:0009986;GO:0016020;GO:0016021;GO:0019731;GO:0030670;GO:0030881;GO:0032398;GO:0032736;GO:0032753;GO:0032759;GO:0032760;GO:0032819;GO:0036037;GO:0042270;GO:0042288;GO:0042605;GO:0042608;GO:0042612;GO:…	K06751	-	W;U	09WNN;0US52;0VB3S;1CU56;0II5V;13KER;1B76X;195YP;0DJCZ	histocompatibility 2, T region locus 23 [Source:MGI Symbol;Acc:MGI:95957]	15040	P06339;Q3V014
ENSMUSG00000060657	3586.56	2995.66	4177.46	1.3945	0.479752	0.000930037	0.0277916	16	13927037	13981215	-	10153	Marf1	GO:0003676;GO:0003723;GO:0005737;GO:0005777;GO:0005777;GO:0005777;GO:0005777;GO:0005794;GO:0005794;GO:0006302;GO:0007143;GO:0010468;GO:0010468;GO:0010923;GO:0010923;GO:0010923;GO:0016441;GO:0030154;GO:0043231;GO:0043231;GO:0048477;GO:0051321;GO:1903231;GO:1905762;GO:0003676;GO:0003723;GO:0005777;GO:0010468;GO:0030154;	K17573	-	S;K	0UISH;0V8EQ;1CTJI;1AY0S;0DFZ0;12P8T;09XGN;18YWK;0IF58	meiosis regulator and mRNA stability 1 [Source:MGI Symbol;Acc:MGI:2444505]	223989	Q8BJ34
ENSMUSG00000031309	2106.27	1745.59	2466.94	1.41324	0.499011	0.00093093	0.0277916	X	157993303	158151240	+	8322	Rps6ka3	GO:0000166;GO:0000287;GO:0004672;GO:0004674;GO:0004674;GO:0005524;GO:0005524;GO:0006468;GO:0016301;GO:0016310;GO:0016740;GO:0035556;GO:0106310;GO:0106311;GO:0000166;GO:0000287;GO:0002224;GO:0004672;GO:0004674;GO:0004674;GO:0004674;GO:0004674;GO:0004711;GO:0005515;GO:0005515;GO:0005524;GO:0005524;GO:0005634;GO:0005654;GO:0005654;GO:0005654;GO:0005730;GO:0005737;GO:0005737;GO:0005829;GO:0006468;GO:…	K04373	EC:2.7.11.1	T	0V44X;1CP76;KOG0598;12P0N;0DEHF;0UJRS;1ASCC;09T66;18T7P	ribosomal protein S6 kinase polypeptide 3 [Source:MGI Symbol;Acc:MGI:104557]	110651	P18654
ENSMUSG00000038178	2895.81	3447.23	2344.38	0.680078	-0.556227	0.000931563	0.0277916	11	75422520	75468401	+	10042	Slc43a2	GO:0015179;GO:0015807;GO:0016020;GO:0016021;GO:0055085;GO:1902475;GO:0005886;GO:0015175;GO:0015179;GO:0015179;GO:0015179;GO:0015804;GO:0015807;GO:0015807;GO:0016020;GO:0016021;GO:0022857;GO:0051956;GO:0055085;GO:0060358;GO:1902475;GO:0005886;GO:0015175;GO:0015179;GO:0015179;GO:0015179;GO:0015804;GO:0015807;GO:0015807;GO:0016020;GO:0016021;GO:0022857;GO:0051956;GO:0055085;GO:0060358;GO:1902475;GO:…	K08229	-	P	1CTQC;0IHJQ;0V6IG;194FX;09VJC;13CV8;0DGTZ;0URU3;1AW1A	solute carrier family 43, member 2 [Source:MGI Symbol;Acc:MGI:2442746]	215113	Q8CGA3
ENSMUSG00000020717	42.4855	21.5347	63.4362	2.94577	1.55864	0.000934264	0.027815	11	106545043	106641454	-	6228	Pecam1	GO:0001525;GO:0001726;GO:0001886;GO:0001934;GO:0002687;GO:0002693;GO:0004888;GO:0005515;GO:0005615;GO:0005737;GO:0005886;GO:0005886;GO:0005887;GO:0005911;GO:0006909;GO:0007155;GO:0007155;GO:0007156;GO:0007159;GO:0007166;GO:0007266;GO:0009897;GO:0009897;GO:0009986;GO:0016020;GO:0016020;GO:0016021;GO:0019903;GO:0030054;GO:0030334;GO:0030335;GO:0030485;GO:0030837;GO:0032991;GO:0034260;GO:0035696;GO:…	K06471	-	T;W	18SPF;0II37;09YD9;1AY4E;0UNMM;1CUK9;12NX0;0V9AV;0DJT4	platelet/endothelial cell adhesion molecule 1 [Source:MGI Symbol;Acc:MGI:97537]	18613	Q08481
ENSMUSG00000059920	396.423	308.763	484.084	1.56782	0.648759	0.000944527	0.0280142	16	64572114	64591524	-	5948	4930453N24Rik	GO:0003674;GO:0005634;GO:0005634;GO:0006915;GO:0043065;GO:0043065;	-	-	S	1CX8X;12T77;1ARJM;0IKGU;09UE3;0DNBU;0VBKT;0UUFH;18UHK	RIKEN cDNA 4930453N24 gene [Source:MGI Symbol;Acc:MGI:1914859]	67609	Q3TTL0
ENSMUSG00000024759	1776.87	1469.66	2084.07	1.41806	0.503921	0.000944819	0.0280142	19	7471405	7517039	+	10099	Atl3	GO:0003924;GO:0005525;GO:0016020;GO:0016021;GO:0003924;GO:0005525;GO:0016020;GO:0016021;GO:0005525;GO:0000166;GO:0003924;GO:0003924;GO:0005525;GO:0005525;GO:0005525;GO:0005783;GO:0005783;GO:0005783;GO:0005789;GO:0007029;GO:0007029;GO:0007029;GO:0007029;GO:0007030;GO:0007030;GO:0007030;GO:0016020;GO:0016021;GO:0016021;GO:0016021;GO:0016787;GO:0042802;GO:0042802;GO:0042802;GO:0051260;GO:0051260;GO:…	K17339	EC:3.6.5.-	S;K	1AVD3;18U2G;0UJVZ;1CSCT;KOG2037;09WD3;0DHNC;12SCZ;0V7BI	atlastin GTPase 3 [Source:MGI Symbol;Acc:MGI:1924270]	109168	Q91YH5
ENSMUSG00000020340	2951.02	3484	2418.04	0.694043	-0.526903	0.000953937	0.0282268	11	46084677	46203686	-	7103	Cyfip2	GO:0000902;GO:0005515;GO:0005515;GO:0005634;GO:0005737;GO:0005737;GO:0006915;GO:0006915;GO:0006915;GO:0007155;GO:0030054;GO:0030833;GO:0031175;GO:0043005;GO:0045202;GO:0045202;GO:0045202;GO:0045862;GO:0048471;GO:0048471;GO:0051388;GO:0097202;GO:0097202;GO:0097484;GO:0098609;GO:0098609;GO:0000902;GO:0005515;GO:0005515;GO:0005634;GO:0005737;GO:0005737;GO:0006915;GO:0006915;GO:0006915;GO:0007155;GO:…	K05749	-	S;K	1ATD0;0UK5M;0DHVC;1CSJZ;1918W;12QSQ;0V74E;09WJZ;KOG3534	cytoplasmic FMR1 interacting protein 2 [Source:MGI Symbol;Acc:MGI:1924134]	76884	Q5SQX6
ENSMUSG00000056708	1785.2	1476.89	2093.52	1.41752	0.503371	0.000969038	0.0286152	1	154972107	154975382	-	3276	Ier5	GO:0000159;GO:0000159;GO:0000159;GO:0005634;GO:0005634;GO:0005634;GO:0005654;GO:0005654;GO:0005730;GO:0005730;GO:0005737;GO:0005737;GO:0005737;GO:0034605;GO:0034605;GO:0034605;GO:0042127;GO:0042127;GO:0042127;GO:0042802;GO:0042802;GO:0042802;GO:0045944;GO:0045944;GO:0045944;GO:1900036;GO:1900036;GO:1900036;	-	-	U	1CZ0D;0VBN7;193WV;0A2UG;0DQGJ;0UTQR;0J10V;1B4H4;13UQ7	immediate early response 5 [Source:MGI Symbol;Acc:MGI:1337072]	15939	O89113;Q3UJ54
ENSMUSG00000000441	1141.05	1360.65	921.446	0.677208	-0.562329	0.000980655	0.0288994	6	115595028	115653596	-	6845	Raf1	GO:0000165;GO:0000166;GO:0000186;GO:0001666;GO:0001678;GO:0001934;GO:0004672;GO:0004672;GO:0004672;GO:0004674;GO:0004674;GO:0004709;GO:0005515;GO:0005515;GO:0005524;GO:0005524;GO:0005524;GO:0005634;GO:0005737;GO:0005737;GO:0005739;GO:0005739;GO:0005794;GO:0005829;GO:0005829;GO:0005886;GO:0005886;GO:0005886;GO:0006468;GO:0006468;GO:0007165;GO:0007190;GO:0008179;GO:0008285;GO:0010856;GO:0016020;GO:…	K04366	EC:2.7.11.1	T	09WN6;1CWER;0UQSB;0DHXQ;1AV29;12SII;KOG0193;18XIG;0V7KT	v-raf-leukemia viral oncogene 1 [Source:MGI Symbol;Acc:MGI:97847]	110157	Q99N57
ENSMUSG00000040747	6893.7	5506.94	8280.45	1.50364	0.588458	0.000983643	0.0289287	3	106667237	106697465	-	1742	Cd53	GO:0001772;GO:0001772;GO:0005886;GO:0005887;GO:0005911;GO:0009986;GO:0009986;GO:0016020;GO:0016021;GO:0016021;GO:0030054;GO:0042802;GO:0042802;GO:1901741;	K06489	-	S;G	0DJDD;18WTW;0V8XZ;13MGN;1AVVB;KOG3882;0UMYG;1CU5N;09Y0B	CD53 antigen [Source:MGI Symbol;Acc:MGI:88341]	12508	Q61451;Q3U0W1;Q3TV80
ENSMUSG00000031628	269.433	134.591	404.274	3.00371	1.58675	0.000989866	0.0289996	8	47070326	47092724	+	3357	Casp3	GO:0001554;GO:0001666;GO:0001782;GO:0002020;GO:0002020;GO:0004190;GO:0004197;GO:0004197;GO:0004197;GO:0004197;GO:0004861;GO:0005123;GO:0005123;GO:0005515;GO:0005634;GO:0005634;GO:0005737;GO:0005737;GO:0005737;GO:0005737;GO:0005737;GO:0005829;GO:0005829;GO:0005829;GO:0005829;GO:0006508;GO:0006508;GO:0006508;GO:0006508;GO:0006508;GO:0006915;GO:0006915;GO:0006915;GO:0006915;GO:0006915;GO:0006974;GO:…	K02187	EC:3.4.22.56	T;D	18UP4;0DR4M;13KPR;1B4TH;0UNRN;0VE4P;0A3HR;1CYB8;KOG3573	caspase 3 [Source:MGI Symbol;Acc:MGI:107739]	12367	P70677
ENSMUSG00000037331	7825.32	6578.66	9071.99	1.379	0.463626	0.000990054	0.0289996	11	57899890	57952860	+	6829	Larp1	GO:0003723;GO:0000339;GO:0000339;GO:0000340;GO:0000340;GO:0003723;GO:0003730;GO:0003730;GO:0005737;GO:0005737;GO:0005844;GO:0005844;GO:0006413;GO:0006413;GO:0006417;GO:0008190;GO:0008190;GO:0008283;GO:0008283;GO:0008494;GO:0008494;GO:0010494;GO:0010494;GO:0010608;GO:0016239;GO:0017148;GO:0017148;GO:0031369;GO:0031369;GO:0031929;GO:0031929;GO:0031931;GO:0031931;GO:0038202;GO:0038202;GO:0042788;GO:…	K18757	-	O;J	12RRR;0V7PU;0DI11;KOG2590;1CSRR;09WRF;18YBQ;0UP4C;1B0DG	La ribonucleoprotein domain family, member 1 [Source:MGI Symbol;Acc:MGI:1890165]	73158	Q6ZQ58
ENSMUSG00000026341	13160.5	11085.9	15235.1	1.37428	0.458671	0.00100385	0.0292704	1	125320642	125363464	-	4631	Actr3	GO:0000139;GO:0000166;GO:0001726;GO:0002102;GO:0003779;GO:0003779;GO:0005200;GO:0005515;GO:0005515;GO:0005524;GO:0005524;GO:0005634;GO:0005634;GO:0005737;GO:0005737;GO:0005856;GO:0005884;GO:0005885;GO:0005885;GO:0005885;GO:0005885;GO:0005903;GO:0005911;GO:0007015;GO:0007163;GO:0008356;GO:0010592;GO:0010592;GO:0010763;GO:0016344;GO:0030027;GO:0030030;GO:0030056;GO:0030517;GO:0030838;GO:0031252;GO:…	K18584	-	Z	12S7T;0UKGP;0VAMK;KOG0678;1CVVW;0DM0Z;09ZR3;1AVZR;18U5X	ARP3 actin-related protein 3 [Source:MGI Symbol;Acc:MGI:1921367]	74117	Q99JY9;Q3ULF7
ENSMUSG00000021843	1575.34	1241.01	1909.68	1.53881	0.621819	0.00100449	0.0292704	14	47885905	47977351	+	12912	Ktn1	GO:0005783;GO:0007018;GO:0015031;GO:0016020;GO:0016021;GO:0019894;GO:0030176;GO:0007018;GO:0015031;GO:0016020;GO:0016021;GO:0019894;GO:0030176;GO:0007018;GO:0015031;GO:0016020;GO:0016021;GO:0019894;GO:0030176;GO:0007018;GO:0015031;GO:0016020;GO:0016021;GO:0019894;GO:0030176;GO:0007018;GO:0015031;GO:0016020;GO:0016021;GO:0019894;GO:0030176;GO:0007018;GO:0015031;GO:0016020;GO:0016021;GO:0019894;GO:…	K17975	-	T	1CRRX;1AUJD;0IIAW;195JV;0UJ28;0V6S4;13K9A;0DH1Q;09VTD	kinectin 1 [Source:MGI Symbol;Acc:MGI:109153]	16709	Q61595;F8VQC7
ENSMUSG00000029174	2681.08	2234.77	3127.4	1.39943	0.484839	0.00100536	0.0292704	5	64313648	64508829	+	7405	Tbc1d1	GO:0005096;GO:0005096;GO:0005515;GO:0005515;GO:0005634;GO:0005829;GO:0006886;GO:0031267;GO:0032880;GO:0032880;GO:0090630;GO:0005096;GO:0005096;GO:0005515;GO:0005515;GO:0005634;GO:0005829;GO:0006886;GO:0031267;GO:0032880;GO:0043547;GO:0090630;GO:0005096;GO:0005096;GO:0005515;GO:0005515;GO:0005634;GO:0005829;GO:0006886;GO:0031267;GO:0032880;GO:0043547;GO:0090630;GO:0005096;GO:0043547;	K18341	-	S;F	KOG4436;09WCP;13HQ5;0DHMZ;0UJVH;1CSCF;1B1Q0;0V7B5;19573	TBC1 domain family, member 1 [Source:MGI Symbol;Acc:MGI:1889508]	57915	Q60949
ENSMUSG00000031807	496.756	600.213	393.298	0.655264	-0.609852	0.00100995	0.0293297	8	72044820	72053736	+	3770	Pgls	GO:0005737;GO:0005737;GO:0005975;GO:0006098;GO:0006098;GO:0006098;GO:0006098;GO:0009051;GO:0009051;GO:0016787;GO:0017057;GO:0017057;GO:0017057;GO:0017057;GO:0017057;GO:0048029;GO:0005975;GO:0005975;GO:0006098;GO:0006098;GO:0016787;GO:0017057;GO:0017057;GO:0005975;GO:0005975;GO:0006098;GO:0006098;GO:0016787;GO:0017057;GO:0017057;GO:0005975;GO:0005975;GO:0006098;GO:0006098;GO:0016787;GO:0017057;GO:…	K01057	EC:3.1.1.31	G	1D03E;0A3BC;KOG3147;190ZS;0UU8E;13G28;0DQZ1;1B4RF;0VD2Y	6-phosphogluconolactonase [Source:MGI Symbol;Acc:MGI:1913421]	66171	Q9CQ60
ENSMUSG00000016524	57.5683	31.8504	83.2861	2.61491	1.38676	0.00101242	0.0293297	1	130860393	130867852	-	1149	Il19	GO:0005125;GO:0005576;GO:0005615;GO:0006915;GO:0007165;GO:0010989;GO:0072593;GO:2001235;GO:2001237;GO:2001244;GO:0005125;GO:0005576;GO:0005615;GO:0006915;GO:0007165;GO:0010989;GO:0072593;GO:2001235;GO:2001237;GO:2001244;GO:0005125;GO:0005576;GO:0005615;GO:0006915;GO:0007165;GO:0010989;GO:0072593;GO:2001235;GO:2001237;GO:2001244;	K05444	-	S;T	0A457;192VB;0UUPA;0VF3I;1D236;0IWQW;0DSSI;1B58S;13QEF	interleukin 19 [Source:MGI Symbol;Acc:MGI:1890472]	329244	Q8CJ70;Q14BK1
ENSMUSG00000027360	601.505	383.649	819.361	2.13571	1.09471	0.00101346	0.0293297	2	126435587	126461219	-	6389	Hdc	GO:0001692;GO:0001694;GO:0001694;GO:0001694;GO:0001694;GO:0003824;GO:0004398;GO:0004398;GO:0004398;GO:0004398;GO:0005737;GO:0005829;GO:0006520;GO:0006547;GO:0006548;GO:0006548;GO:0006548;GO:0016597;GO:0016829;GO:0016831;GO:0016831;GO:0016831;GO:0019752;GO:0030170;GO:0030170;GO:0030425;GO:0042423;GO:0042802;GO:0043025;	K01590	EC:4.1.1.22	E	0DMI5;1CWDD;1ATRU;0VAVF;18X4K;0UQQT;KOG0628;09ZYP;12QW1	histidine decarboxylase [Source:MGI Symbol;Acc:MGI:96062]	15186	P23738
ENSMUSG00000008200	3224.85	2516.48	3933.23	1.56299	0.644308	0.00102795	0.0296668	2	90575714	90611365	+	6583	Fnbp4	GO:0016607;	K24774	-	S	0IIQY;1B3CP;09V0V;13JMM;0DGA8;0UJRM;1CQZM;18VX4;0V60H	formin binding protein 4 [Source:MGI Symbol;Acc:MGI:1860513]	55935	Q6ZQ03;A0A0R4IZZ6
ENSMUSG00000025860	2243.99	1860.86	2627.11	1.41177	0.497503	0.00102977	0.0296668	X	41148556	41198533	+	9469	Xiap	GO:0002020;GO:0004842;GO:0004842;GO:0005515;GO:0005515;GO:0005515;GO:0005634;GO:0005634;GO:0005634;GO:0005737;GO:0005737;GO:0005737;GO:0005829;GO:0005876;GO:0006915;GO:0016055;GO:0016567;GO:0016740;GO:0031398;GO:0031398;GO:0032991;GO:0042802;GO:0043027;GO:0043066;GO:0043154;GO:0043154;GO:0043524;GO:0046872;GO:0048471;GO:0051402;GO:0061630;GO:0061630;GO:0090263;GO:0090263;GO:0090307;GO:0097110;GO:…	K04725	EC:2.3.2.27	O;D	09XU3;13HTW;KOG1101;1B1TM;18X53;0UKTW;0DNFT;1CXD6;0V8RR	X-linked inhibitor of apoptosis [Source:MGI Symbol;Acc:MGI:107572]	11798	Q60989
ENSMUSG00000023852	1926.3	1594.16	2258.44	1.4167	0.50253	0.00103332	0.0296668	17	15925229	15992872	+	8721	Chd1	GO:0000166;GO:0003677;GO:0003678;GO:0003682;GO:0004386;GO:0005524;GO:0005524;GO:0005634;GO:0005634;GO:0005737;GO:0005737;GO:0006325;GO:0006333;GO:0006338;GO:0016569;GO:0016787;GO:0032508;GO:0035064;GO:0043923;GO:0000166;GO:0003678;GO:0005524;GO:0005524;GO:0006325;GO:0032508;GO:0000166;GO:0005524;GO:0005524;GO:0005634;	K11367	EC:3.6.4.12	K;B	1CVAR;0V5V9;195KI;KOG0383;12PMF;0UPER;09Z19;1B02Z;0DKGT	chromodomain helicase DNA binding protein 1 [Source:MGI Symbol;Acc:MGI:88393]	12648	P40201
ENSMUSG00000035208	357.824	201.817	513.831	2.54602	1.34825	0.00103432	0.0296668	11	82892984	82911636	-	4091	Slfn8	GO:0000049;GO:0000166;GO:0002376;GO:0004518;GO:0004519;GO:0004521;GO:0004521;GO:0005524;GO:0005737;GO:0005737;GO:0008270;GO:0008270;GO:0016075;GO:0016078;GO:0016787;GO:0046872;GO:0051607;GO:0090305;GO:0090502;GO:0000049;GO:0000166;GO:0002376;GO:0004518;GO:0004519;GO:0004521;GO:0004521;GO:0005524;GO:0005737;GO:0005737;GO:0008270;GO:0008270;GO:0016075;GO:0016078;GO:0016787;GO:0046872;GO:0051607;GO:…	K24459	EC:3.1.-.-	S	13MK6;0DNJW;1CXGY;0IJEW;0VBV2;1ATW2;0A0YK;0UNAG	schlafen 8 [Source:MGI Symbol;Acc:MGI:2672859]	276950	B1ARD8
ENSMUSG00000033365	1005.35	1189.26	821.431	0.690708	-0.533853	0.00103534	0.0296668	4	117751683	117772196	-	4207	Ipo13	GO:0005634;GO:0005634;GO:0005737;GO:0005737;GO:0005737;GO:0006606;GO:0006606;GO:0006606;GO:0006886;GO:0015031;GO:0035259;	-	-	U	12TIT;1923B;0A1J9;0UKWN;KOG2022;0V6S0;1CY59;0DP79;1B0MM	importin 13 [Source:MGI Symbol;Acc:MGI:2385205]	230673	Q8K0C1
ENSMUSG00000021242	14697.1	11870.3	17523.9	1.47629	0.561972	0.00103904	0.0297142	12	84801336	84819926	-	5438	Npc2	GO:0005576;GO:0005615;GO:0005615;GO:0005764;GO:0005764;GO:0005764;GO:0005783;GO:0006629;GO:0006869;GO:0008202;GO:0008203;GO:0015485;GO:0015485;GO:0015485;GO:0015485;GO:0015918;GO:0019899;GO:0030301;GO:0030301;GO:0030301;GO:0032366;GO:0032366;GO:0032367;GO:0032367;GO:0032367;GO:0032367;GO:0032934;GO:0033344;GO:0033344;GO:0033344;GO:0042632;GO:0042632;GO:0120009;GO:0120020;	K13443	-	S;L	0UVCE;0VKFM;0DUK7;0A7KC;1D3V3;1931F;1AU5V;13SU5;KOG4063	NPC intracellular cholesterol transporter 2 [Source:MGI Symbol;Acc:MGI:1915213]	67963	Q9Z0J0
ENSMUSG00000072620	25351.5	20546	30157.1	1.46778	0.553639	0.00105535	0.0301211	11	82955938	82961504	+	1664	Slfn2	GO:0008285;GO:0009617;	K24457	-	S	1D111;1423J;19473;0A069;1B7CR;0VDXK;0JAUV;0DRSW;0UUIB	schlafen 2 [Source:MGI Symbol;Acc:MGI:1313258]	20556	Q9Z0I6
ENSMUSG00000024423	1224.77	1443.14	1006.4	0.697368	-0.520008	0.00106141	0.0302346	18	13088909	13126007	+	5129	Impact	GO:0000122;GO:0001933;GO:0001933;GO:0001933;GO:0003779;GO:0004860;GO:0005515;GO:0005515;GO:0005737;GO:0005844;GO:0005844;GO:0006417;GO:0006446;GO:0006469;GO:0007399;GO:0030154;GO:0031333;GO:0031953;GO:0034198;GO:0042149;GO:0043022;GO:0043022;GO:0045666;GO:0060548;GO:0070301;GO:0071264;GO:0071264;GO:0071468;GO:0071494;GO:0072755;GO:0097201;GO:0140469;GO:0140469;GO:1905538;GO:1990138;GO:1990253;GO:…	-	-	S;E	0DF8Y;13P7I;18S8X;0V4XU;KOG3299;1B4BH;1CPYJ;09TYY;0UFE2	impact, RWD domain protein [Source:MGI Symbol;Acc:MGI:1098233]	16210	O55091
ENSMUSG00000044340	833.371	676.573	990.169	1.46351	0.549429	0.00106628	0.0303137	1	106099482	106321980	+	6752	Phlpp1	GO:0001932;GO:0002667;GO:0004721;GO:0004722;GO:0004722;GO:0004722;GO:0005634;GO:0005654;GO:0005737;GO:0005737;GO:0005737;GO:0005886;GO:0006470;GO:0006915;GO:0007165;GO:0009649;GO:0016020;GO:0016787;GO:0016791;GO:0031965;GO:0042981;GO:0042981;GO:0043231;GO:0043408;GO:0043408;GO:0046328;GO:0046328;GO:0046872;GO:0051897;GO:0051898;GO:0051898;GO:0070373;GO:0090037;GO:0090038;GO:0106306;GO:0106307;GO:…	K16340	EC:3.1.3.16	T	0USCI;12PJQ;KOG0619;0VA38;1AVQJ;0DINI;09Z5X;18UK0;1CTDD	PH domain and leucine rich repeat protein phosphatase 1 [Source:MGI Symbol;Acc:MGI:2138327]	98432	Q8CHE4
ENSMUSG00000091649	2185.77	987.138	3384.39	3.42849	1.77757	0.00107337	0.0304556	14	59558413	59578800	-	1184	Phf11b	GO:0003674;GO:0005634;GO:0005654;GO:0008150;GO:0031965;GO:0046872;	-	-	K	1CVYF;0UQ6M;0VAGS;0DM3F;13P62;09ZJZ;KOG1084	PHD finger protein 11B [Source:MGI Symbol;Acc:MGI:3645789]	236451	B4XVQ1
ENSMUSG00000044350	8464.37	6433.02	10495.7	1.63154	0.70623	0.00111884	0.0316372	14	77261640	77274344	-	3644	Lacc1	GO:0002221;GO:0002221;GO:0002376;GO:0004000;GO:0004000;GO:0004731;GO:0004731;GO:0005507;GO:0005634;GO:0005737;GO:0005777;GO:0005777;GO:0005783;GO:0005783;GO:0006954;GO:0016740;GO:0016787;GO:0017061;GO:0017061;GO:0030641;GO:0030641;GO:0045087;GO:0046872;GO:0047975;GO:0047975;GO:0050727;GO:0055114;GO:0070431;GO:1900542;	K05810	EC:1.10.3.-	S	1AYAA;0VCWZ;18Y6S;0A3B9;0IHUK;1CX85;13IUI;0DNB5;0UPRY	laccase domain containing 1 [Source:MGI Symbol;Acc:MGI:2445077]	210808	Q8BZT9
ENSMUSG00000027883	313.814	233.251	394.377	1.69078	0.75769	0.00111938	0.0316372	3	108585954	108629625	-	3909	Gpsm2	GO:0000132;GO:0000132;GO:0000166;GO:0000922;GO:0001965;GO:0005092;GO:0005515;GO:0005515;GO:0005737;GO:0005737;GO:0005813;GO:0005829;GO:0005856;GO:0005886;GO:0005938;GO:0005938;GO:0007049;GO:0007052;GO:0007052;GO:0008022;GO:0016020;GO:0016328;GO:0019904;GO:0030695;GO:0031291;GO:0031291;GO:0032991;GO:0042802;GO:0043621;GO:0050790;GO:0051301;GO:0051661;GO:0051661;GO:0060236;GO:0060236;GO:0070840;GO:…	K15837	-	T	18V2P;0DH65;0V77M;1AVIN;KOG1130;1CRWA;09Y8C;0UJNT;12PSX	G-protein signalling modulator 2 (AGS3-like, C. elegans) [Source:MGI Symbol;Acc:MGI:1923373]	76123	Q8VDU0;Q3UPG3
ENSMUSG00000020611	4962.01	3861.4	6062.62	1.57006	0.650816	0.00113382	0.0319831	11	109253657	109292195	+	6421	Gna13	GO:0000166;GO:0001525;GO:0001569;GO:0001664;GO:0001664;GO:0001701;GO:0003924;GO:0003924;GO:0003924;GO:0005515;GO:0005525;GO:0005634;GO:0005634;GO:0005737;GO:0005737;GO:0005829;GO:0005834;GO:0005834;GO:0005886;GO:0007165;GO:0007165;GO:0007186;GO:0007186;GO:0007186;GO:0007188;GO:0007188;GO:0007189;GO:0007189;GO:0007204;GO:0007204;GO:0007266;GO:0007266;GO:0007266;GO:0008360;GO:0016020;GO:0019001;GO:…	K04639	-	T;D	1AWJ9;09X7M;1CP7W;KOG0082;0DEI3;13IT4;18XGF;0V867;0UM3J	guanine nucleotide binding protein, alpha 13 [Source:MGI Symbol;Acc:MGI:95768]	14674	P27601;Q9D034;Q8K086;Q3UE40
ENSMUSG00000025888	4476.14	3489.86	5462.41	1.56522	0.646367	0.00115187	0.0324289	9	5298508	5307290	+	3136	Casp1	GO:0001666;GO:0001774;GO:0001819;GO:0004175;GO:0004175;GO:0004197;GO:0004197;GO:0004197;GO:0005515;GO:0005515;GO:0005515;GO:0005576;GO:0005634;GO:0005737;GO:0005737;GO:0005737;GO:0005739;GO:0005829;GO:0005886;GO:0006508;GO:0006508;GO:0006508;GO:0006508;GO:0006915;GO:0007520;GO:0007613;GO:0008233;GO:0008233;GO:0008234;GO:0008234;GO:0009617;GO:0010506;GO:0014070;GO:0016020;GO:0016485;GO:0016540;GO:…	K01370	EC:3.4.22.36	D	0VAES;1CVVC;12S0S;0UFW8;0DM0G;18U4W;09WHC;KOG3573;1AZ8D	caspase 1 [Source:MGI Symbol;Acc:MGI:96544]	12362	P29452
ENSMUSG00000024339	1627.28	1289.67	1964.9	1.52357	0.607457	0.00116938	0.0328411	17	34422501	34435295	+	3781	Tap2	GO:0000166;GO:0000166;GO:0001916;GO:0002237;GO:0002250;GO:0002376;GO:0002481;GO:0002485;GO:0002489;GO:0002591;GO:0005515;GO:0005524;GO:0005524;GO:0005524;GO:0005783;GO:0005783;GO:0005789;GO:0015031;GO:0015433;GO:0015433;GO:0015440;GO:0015440;GO:0015833;GO:0015833;GO:0015833;GO:0015833;GO:0016020;GO:0016020;GO:0016021;GO:0016021;GO:0016021;GO:0016021;GO:0016607;GO:0016887;GO:0019885;GO:0019885;GO:…	K05654	-	Q;U	0UHUR;KOG0058;09UWX;1CQW0;18W8U;0V5WR;1ATGI;12RBY;0DG6C	transporter 2, ATP-binding cassette, sub-family B (MDR/TAP) [Source:MGI Symbol;Acc:MGI:98484]	21355	P36371;Q792S7
ENSMUSG00000034807	2780.87	3268.86	2292.88	0.701431	-0.511627	0.00117103	0.0328411	8	72063642	72077555	+	4326	Colgalt1	GO:0005783;GO:0005788;GO:0005788;GO:0005788;GO:0016740;GO:0016757;GO:0018215;GO:0050211;GO:0050211;GO:0050211;GO:0050211;GO:1904028;GO:1904028;GO:1904028;	K11703	EC:2.4.1.50	O	KOG4179;09UKS;190J4;0V5K6;1CQJT;0DFWG;12P9N;0UJH1;1AW79	collagen beta(1-O)galactosyltransferase 1 [Source:MGI Symbol;Acc:MGI:1924348]	234407	Q8K297
ENSMUSG00000023952	2671.51	2128.54	3214.48	1.51018	0.594724	0.00118738	0.0332352	17	46471958	46480296	+	5305	Gtpbp2	GO:0000166;GO:0003746;GO:0003924;GO:0005515;GO:0005515;GO:0005525;GO:0005525;GO:0005525;GO:0006414;GO:0042802;GO:0043231;GO:0070966;GO:0072344;GO:0000166;GO:0003924;GO:0005525;GO:0005525;GO:0042802;GO:0000166;GO:0005525;	-	-	J	1AU7F;1CTBP;0V6SR;18T99;KOG0463;12S17;09X9C;0DIKS;0UIQ1	GTP binding protein 2 [Source:MGI Symbol;Acc:MGI:1860138]	56055	Q3UJK4
ENSMUSG00000024812	521.142	627.235	415.049	0.661712	-0.595725	0.00119333	0.0333375	19	24071869	24202394	-	6199	Tjp2	GO:0005886;GO:0005923;GO:0005923;GO:0005923;GO:0008022;GO:0010033;GO:0016020;GO:0005515;GO:0005515;GO:0005634;GO:0005634;GO:0005634;GO:0005886;GO:0005886;GO:0005886;GO:0005911;GO:0005911;GO:0005921;GO:0005923;GO:0005923;GO:0005923;GO:0005923;GO:0008022;GO:0009986;GO:0016020;GO:0019904;GO:0030054;GO:0030054;GO:0030674;GO:0034109;GO:0044291;GO:0045216;GO:0050839;GO:0050892;GO:0070160;GO:0071847;GO:…	K06098	-	T	18TVU;1CZ0V;0URM8;0DF65;12RKK;09TVQ;KOG3580;1B1J1;0V4UW	tight junction protein 2 [Source:MGI Symbol;Acc:MGI:1341872]	21873	Q9Z0U1
ENSMUSG00000000489	1194.21	1520.94	867.475	0.570354	-0.810071	0.00119644	0.03336	15	79880075	79899178	-	4161	Pdgfb	GO:0001938;GO:0002548;GO:0005161;GO:0005518;GO:0005576;GO:0006468;GO:0008083;GO:0008083;GO:0008083;GO:0008284;GO:0009611;GO:0009986;GO:0010512;GO:0010544;GO:0010628;GO:0010629;GO:0010811;GO:0014068;GO:0014911;GO:0016020;GO:0016176;GO:0018105;GO:0018108;GO:0030335;GO:0031954;GO:0032091;GO:0032147;GO:0032148;GO:0035655;GO:0035793;GO:0042056;GO:0042802;GO:0042803;GO:0043406;GO:0043410;GO:0043536;GO:…	K17386	-	W;B	1AWYI;0V6A1;0IJ45;0DGJ4;1CR8Z;0UIAU;18V7B;09VAQ;13JSP	platelet derived growth factor, B polypeptide [Source:MGI Symbol;Acc:MGI:97528]	18591	P31240;A0A0R4IZW4
ENSMUSG00000039899	2553.52	655.898	4451.13	6.78631	2.76263	0.00120795	0.0335616	5	21577640	21583372	+	3788	Fgl2	GO:0002291;GO:0002605;GO:0002617;GO:0005102;GO:0005576;GO:0005615;GO:0006508;GO:0008233;GO:0019835;GO:0043381;GO:0050687;GO:0062023;	-	-	S;E	1CST4;09WSV;0DI2K;12Q3T;0UPWT;1AZK0;KOG2579;0V7R2;1914D	fibrinogen-like protein 2 [Source:MGI Symbol;Acc:MGI:103266]	14190	P12804;Q544K3
ENSMUSG00000032468	1001.86	820.872	1182.86	1.44097	0.527045	0.00121267	0.0335616	9	99360425	99450952	-	6531	Armc8	GO:0000151;GO:0005634;GO:0005634;GO:0005654;GO:0005737;GO:0005737;GO:0005829;GO:0043231;GO:0000151;GO:0000151;GO:0003674;GO:0005634;GO:0005634;GO:0005737;GO:0005737;GO:0034657;GO:0043161;GO:0000151;GO:0000151;GO:0003674;GO:0005634;GO:0005634;GO:0005737;GO:0005737;GO:0034657;GO:0043161;	K23336	-	S	1AT0D;0V50X;KOG1293;18ZF8;0UJC7;13BFK;09U20;1CZZW;0DQVU	armadillo repeat containing 8 [Source:MGI Symbol;Acc:MGI:1921375]	74125	Q9DBR3;G3X920
ENSMUSG00000024675	1338.75	419.301	2258.21	5.38564	2.42912	0.00121279	0.0335616	19	11382134	11404610	+	1751	Ms4a4c	GO:0003674;GO:0005575;GO:0008150;GO:0016020;GO:0016021;GO:0003674;GO:0005575;GO:0008150;GO:0016020;GO:0016021;GO:0016021;GO:0003674;GO:0005575;GO:0008150;GO:0016020;GO:0016021;GO:0016021;	K22190	-	S	1967A;1AWM6;1CTBK;0DIKP;0UM5X;0VHG7;13UNP;0A6N2;0J084	membrane-spanning 4-domains, subfamily A, member 4C [Source:MGI Symbol;Acc:MGI:1927656]	64380	Q9D3F6
ENSMUSG00000050957	44.7915	23.688	65.895	2.78179	1.47601	0.0012144	0.0335616	19	29298744	29302756	-	708	Insl6	GO:0005179;GO:0005179;GO:0005576;GO:0005576;GO:0007165;GO:0007283;GO:0007286;GO:0008584;GO:0009566;GO:0030317;GO:0043066;	K05255	-	O;T	140P1;0J9YE;1D35S;0VHNW;0UV00;0DTTK;193RR;0A6UR;1B6EF	insulin-like 6 [Source:MGI Symbol;Acc:MGI:1351595]	27356	Q9QY05;Q545M1
ENSMUSG00000026131	10217.4	8623.72	11811.1	1.36961	0.453764	0.00121524	0.0335616	1	33947306	34347742	+	41619	Dst	GO:0003779;GO:0005509;GO:0005737;GO:0005856;GO:0005856;GO:0005874;GO:0008017;GO:0016020;GO:0042995;GO:0045104;GO:0046872;GO:0003779;GO:0005737;GO:0005856;GO:0005856;GO:0005874;GO:0008092;GO:0045104;GO:0003779;GO:0003779;GO:0003779;GO:0005198;GO:0005509;GO:0005515;GO:0005515;GO:0005515;GO:0005634;GO:0005635;GO:0005737;GO:0005737;GO:0005783;GO:0005789;GO:0005856;GO:0005856;GO:0005874;GO:0005882;GO:…	K10382	-	Z	12PJV;09UFA;0DH7H;0UKX7;1B4JZ;1CRXN;0V5EN;18VX5;KOG0516;KOG0517	dystonin [Source:MGI Symbol;Acc:MGI:104627]	13518	Q91ZU6
ENSMUSG00000022476	112.033	148.364	75.7015	0.51024	-0.970752	0.00122222	0.0336319	15	81772429	81810441	-	4991	Polr3h	GO:0002376;GO:0003677;GO:0003899;GO:0003899;GO:0003899;GO:0003899;GO:0003899;GO:0005634;GO:0005654;GO:0005654;GO:0005654;GO:0005666;GO:0005666;GO:0005666;GO:0005666;GO:0005813;GO:0005813;GO:0006139;GO:0006139;GO:0006139;GO:0006351;GO:0006383;GO:0006383;GO:0006383;GO:0006384;GO:0043231;GO:0043231;GO:0045087;GO:0051607;GO:0003899;GO:0005634;GO:0006351;	K03022	-	K	0A1V4;18UTA;1CT2M;13IRY;KOG3297;0VCQS;0DPH9;1ATTM;0USV0	polymerase (RNA) III (DNA directed) polypeptide H [Source:MGI Symbol;Acc:MGI:1926179]	78929	Q9D2C6
ENSMUSG00000059436	2310.49	1727.34	2893.64	1.6752	0.74433	0.00122243	0.0336319	12	76984043	77008975	-	3598	Max	GO:0000122;GO:0000122;GO:0000785;GO:0000785;GO:0000977;GO:0000977;GO:0000978;GO:0000981;GO:0000981;GO:0001227;GO:0001227;GO:0001227;GO:0003677;GO:0003677;GO:0003677;GO:0003700;GO:0003700;GO:0003700;GO:0005515;GO:0005515;GO:0005634;GO:0005634;GO:0005634;GO:0005634;GO:0005634;GO:0005737;GO:0005737;GO:0006355;GO:0006355;GO:0006357;GO:0006357;GO:0006357;GO:0009267;GO:0010243;GO:0010629;GO:0010629;GO:…	K04453	-	K	13UDN;0DJ9P;KOG2483;1AT2Z;0UMYQ;1CU1P;18YE7;0A5S4;0VKAJ	Max protein [Source:MGI Symbol;Acc:MGI:96921]	17187	P28574
ENSMUSG00000040850	1884.99	1568.34	2201.65	1.40381	0.489351	0.00122667	0.0336846	11	30721726	30830361	+	8382	Psme4	GO:0000502;GO:0005634;GO:0005634;GO:0005654;GO:0005654;GO:0005737;GO:0005829;GO:0005829;GO:0006281;GO:0006974;GO:0007275;GO:0007283;GO:0010499;GO:0010499;GO:0010952;GO:0016504;GO:0016504;GO:0016504;GO:0016607;GO:0030154;GO:0035093;GO:0035093;GO:0070577;GO:0070577;GO:0070577;GO:0070628;GO:0070628;GO:1990111;GO:1990111;GO:0006281;GO:0006974;GO:0010952;GO:0016504;GO:0070577;GO:0070628;	K06699	-	O	0VC9F;0USDJ;18SBV;0DP1E;12NQ3;1CWTH;09WZK;KOG1851;1ARKH	proteasome (prosome, macropain) activator subunit 4 [Source:MGI Symbol;Acc:MGI:2143994]	103554	Q5SSW2
ENSMUSG00000041797	494.904	354.784	635.024	1.78989	0.839872	0.00124886	0.0342291	11	109991575	110059022	-	8048	Abca9	GO:0000166;GO:0005319;GO:0005524;GO:0005524;GO:0005739;GO:0006869;GO:0016020;GO:0016021;GO:0016021;GO:0016887;GO:0042626;GO:0042626;GO:0043231;GO:0055085;	K05651	-	Q	0V4GH;12P2M;KOG0059;0DG5X;09THI;1AWAC;18UY8;1CQVH;0UHWM	ATP-binding cassette, sub-family A (ABC1), member 9 [Source:MGI Symbol;Acc:MGI:2386796]	217262	Q8K449
ENSMUSG00000033705	412.036	500.215	323.857	0.647436	-0.62719	0.00125689	0.0343842	2	120459602	120562376	+	22053	Stard9	GO:0000166;GO:0003777;GO:0003777;GO:0003777;GO:0003777;GO:0005524;GO:0005524;GO:0005634;GO:0005634;GO:0005737;GO:0005737;GO:0005814;GO:0005814;GO:0005856;GO:0005871;GO:0005874;GO:0007018;GO:0007018;GO:0008017;GO:0008017;GO:0008017;GO:0008017;GO:0008289;GO:0008574;GO:0016887;GO:0051225;GO:0051225;GO:0000166;GO:0003774;GO:0003777;GO:0005524;GO:0005524;GO:0005874;GO:0007018;GO:0008017;GO:0008289;	K16491	-	Z	1AXT5;0DF02;0V8TH;KOG0245;0UR98;1CPPU;09Y8U;12QSJ;18UHN	START domain containing 9 [Source:MGI Symbol;Acc:MGI:3045258]	668880	-
ENSMUSG00000060802	35231.2	25093.7	45368.8	1.80798	0.854376	0.00127139	0.0346773	2	121978167	121983564	+	860	B2m	GO:0001916;GO:0002237;GO:0002376;GO:0002474;GO:0002481;GO:0002726;GO:0002726;GO:0003254;GO:0005515;GO:0005576;GO:0005615;GO:0005615;GO:0005615;GO:0005794;GO:0005794;GO:0005829;GO:0005829;GO:0005886;GO:0005886;GO:0006826;GO:0006955;GO:0006968;GO:0007275;GO:0007611;GO:0007611;GO:0007611;GO:0009897;GO:0010977;GO:0019731;GO:0019885;GO:0019885;GO:0030670;GO:0032092;GO:0032092;GO:0033077;GO:0034756;GO:…	K08055	-	W	0UVVF;0VJFS;1D4FT;1B5V8;193TW;0DV5C;0A8NX;0J15A;13UV4	beta-2 microglobulin [Source:MGI Symbol;Acc:MGI:88127]	12010	P01887
ENSMUSG00000026399	487.783	329.757	645.809	1.95844	0.969704	0.00127239	0.0346773	1	130366764	130390481	-	4853	Cd55	GO:0001618;GO:0002376;GO:0004857;GO:0005886;GO:0005886;GO:0006958;GO:0008289;GO:0009897;GO:0009986;GO:0016020;GO:0016324;GO:0030449;GO:0030450;GO:0031225;GO:0043086;GO:0045087;GO:0045121;GO:0045916;GO:0046718;GO:1903659;	K04006	-	S;W	1AXRU;12TPM;09YR6;0UP2C;1935J;1CUZJ;0DK5R;0V9P3;0IEGQ	CD55 molecule, decay accelerating factor for complement [Source:MGI Symbol;Acc:MGI:104850]	13136	Q61475
ENSMUSG00000004936	3565.06	2899.22	4230.9	1.45932	0.545297	0.00127514	0.0346872	9	64093052	64160913	-	3391	Map2k1	GO:0000166;GO:0000187;GO:0000187;GO:0000187;GO:0000187;GO:0000278;GO:0003056;GO:0004672;GO:0004674;GO:0004674;GO:0004674;GO:0004708;GO:0004708;GO:0004708;GO:0004708;GO:0004712;GO:0004713;GO:0005078;GO:0005078;GO:0005515;GO:0005524;GO:0005524;GO:0005524;GO:0005634;GO:0005737;GO:0005739;GO:0005769;GO:0005770;GO:0005783;GO:0005783;GO:0005794;GO:0005794;GO:0005815;GO:0005829;GO:0005829;GO:0005829;GO:…	K04368	EC:2.7.12.2	T	0UGQE;1CU7W;KOG0581;1947U;09WH3;0DJFC;12PXQ;1AV6A;0V7FK	mitogen-activated protein kinase kinase 1 [Source:MGI Symbol;Acc:MGI:1346866]	26395	P31938;Q3TMJ8
ENSMUSG00000029560	713.357	849.51	577.205	0.679456	-0.557548	0.00128892	0.0349965	5	140326054	140375017	-	3238	Snx8	GO:0005829;GO:0016020;GO:0035091;GO:0042147;GO:0005829;GO:0015031;GO:0016020;GO:0035091;GO:0042147;GO:0005768;GO:0005829;GO:0006886;GO:0006886;GO:0006886;GO:0008289;GO:0015031;GO:0016020;GO:0030904;GO:0030904;GO:0030904;GO:0031901;GO:0031901;GO:0031901;GO:0034498;GO:0034498;GO:0034498;GO:0035091;GO:0035091;GO:0035091;GO:0035091;GO:0042147;GO:0042802;GO:0042802;GO:0043231;GO:0043231;GO:0005829;GO:…	K17922	-	U	1CXEI;0VBSH;13IER;0A0VY;18XUA;KOG2273;1AWWK;0UGI8;0DNH8	sorting nexin 8 [Source:MGI Symbol;Acc:MGI:2443816]	231834	Q8CFD4
ENSMUSG00000022508	1148.39	804.599	1492.18	1.85456	0.891078	0.00129286	0.0350377	16	23783802	23807602	-	6700	Bcl6	GO:0000122;GO:0000122;GO:0000122;GO:0000122;GO:0000902;GO:0000977;GO:0000978;GO:0000978;GO:0001161;GO:0001227;GO:0001227;GO:0001227;GO:0001817;GO:0001953;GO:0002376;GO:0002467;GO:0002682;GO:0002829;GO:0003677;GO:0003682;GO:0003682;GO:0003700;GO:0003700;GO:0005515;GO:0005515;GO:0005634;GO:0005634;GO:0005634;GO:0005654;GO:0005654;GO:0005654;GO:0005657;GO:0005657;GO:0005730;GO:0005794;GO:0005794;GO:…	K15618	-	K	13N4K;0UMCH;0VDGI;1CW7H;1B0ZT;09XWA;0DR8Z;KOG1721;18TCE	B cell leukemia/lymphoma 6 [Source:MGI Symbol;Acc:MGI:107187]	12053	P41183;Q544F9
ENSMUSG00000026893	696.862	469.718	924.005	1.96715	0.976105	0.0013156	0.0355875	2	62494629	62524453	+	3409	Gca	GO:0005509;GO:0005509;GO:0005509;GO:0005509;GO:0005737;GO:0005829;GO:0005829;GO:0005886;GO:0005886;GO:0016020;GO:0042803;GO:0042803;GO:0046872;GO:0046982;GO:0046982;	K23923	-	T	0VBCJ;0A0GC;18TIV;0DJJK;0UTA1;1CUCC;KOG0037;12QC6;1B161	grancalcin [Source:MGI Symbol;Acc:MGI:1918521]	227960	Q8VC88
ENSMUSG00000022014	1318.84	761.841	1875.84	2.46224	1.29997	0.00132147	0.0356798	14	78141679	78240097	+	2321	Epsti1	GO:0003674;GO:0005575;GO:0008150;	-	-	U	13MS3;1933R;0VCSV;1CYIA;0DPJF;0A1XB;0USX9;0IVJX;1B1N9	epithelial stromal interaction 1 (breast) [Source:MGI Symbol;Acc:MGI:1915168]	108670	Q8VDI1;A0A140T8I6
ENSMUSG00000027878	11699.8	9891.32	13508.2	1.36567	0.449605	0.0013357	0.0359968	3	97920843	98057677	+	10782	Notch2	GO:0000122;GO:0001501;GO:0001701;GO:0001709;GO:0001709;GO:0001889;GO:0001890;GO:0001947;GO:0002011;GO:0002315;GO:0002437;GO:0003184;GO:0003184;GO:0005509;GO:0005515;GO:0005515;GO:0005576;GO:0005634;GO:0005634;GO:0005634;GO:0005654;GO:0005654;GO:0005654;GO:0005737;GO:0005829;GO:0005886;GO:0005886;GO:0005886;GO:0005886;GO:0005887;GO:0005887;GO:0005887;GO:0005929;GO:0006355;GO:0006357;GO:0006959;GO:…	K20994	-	T;K	1BB5A;197AA;0B4ZZ;0WHJN;0E8ME;1DFJ6;0V3C0;0IR7G;13DX8	notch 2 [Source:MGI Symbol;Acc:MGI:97364]	18129	O35516
ENSMUSG00000037876	976.251	800.693	1151.81	1.43852	0.524582	0.0013419	0.036097	10	66931904	67092105	+	17822	Jmjd1c	GO:0000118;GO:0000785;GO:0003382;GO:0003712;GO:0005634;GO:0006325;GO:0006357;GO:0008584;GO:0016491;GO:0031490;GO:0032454;GO:0033169;GO:0036098;GO:0046872;GO:0051213;GO:0055114;GO:0072520;GO:0098727;GO:1990636;	K11449	EC:1.14.11.-	K	0DGBR;0V621;09V2E;12Q1J;KOG1356;1AUG7;0UP40;1CR17;19026	jumonji domain containing 1C [Source:MGI Symbol;Acc:MGI:1918614]	108829	Q69ZK6
ENSMUSG00000046417	207.645	261.595	153.696	0.587537	-0.767249	0.00134601	0.0361404	11	62495710	62539349	-	2089	Lrrc75a	GO:0003674;GO:0005737;GO:0008150;	-	-	S	0E6PX;0B1GV;1BAFX;0IK8Q;13J95;0WE2X;0V1VY;1DDMY	leucine rich repeat containing 75A [Source:MGI Symbol;Acc:MGI:2682293]	192976	Q7TSF4
ENSMUSG00000047832	403.855	317.36	490.349	1.54509	0.627687	0.00136699	0.0366358	12	112783849	112793043	-	4198	Cdca4	GO:0005634;GO:0005634;GO:0005634;GO:0005654;GO:0005654;GO:0005829;GO:0005829;GO:0005886;GO:0005886;GO:0048096;GO:0005634;GO:0005634;GO:0005634;GO:0005654;GO:0005829;GO:0005886;GO:0048096;	-	-	D	1AUQR;1CXF1;0V7MV;0DSHE;13K9D;0UFRH;0IM11;18VSI;0A532	cell division cycle associated 4 [Source:MGI Symbol;Acc:MGI:1919213]	71963	Q9CWM2
ENSMUSG00000057134	511.58	614.594	408.567	0.664775	-0.589062	0.00137695	0.0368348	10	67380341	67384898	-	4558	Ado	GO:0005515;GO:0005739;GO:0016491;GO:0016702;GO:0046872;GO:0047800;GO:0051213;GO:0055114;GO:0055114;	K10712	EC:1.13.11.19	L;E	18W1M;0UJS7;1AV90;0DMEJ;0VBX3;1CW9P;0A10I;KOG4281;13V8A	2-aminoethanethiol (cysteamine) dioxygenase [Source:MGI Symbol;Acc:MGI:2685083]	211488	Q6PDY2
ENSMUSG00000032633	578.059	691.77	464.347	0.671245	-0.575088	0.00138964	0.0370916	11	59682234	59700842	-	4322	Flcn	GO:0000122;GO:0000122;GO:0000122;GO:0001701;GO:0001932;GO:0001932;GO:0001934;GO:0005085;GO:0005096;GO:0005096;GO:0005515;GO:0005634;GO:0005634;GO:0005737;GO:0005737;GO:0005764;GO:0005765;GO:0005765;GO:0005813;GO:0005813;GO:0005815;GO:0005819;GO:0005829;GO:0005829;GO:0005829;GO:0005856;GO:0005886;GO:0005886;GO:0005929;GO:0005929;GO:0007043;GO:0009267;GO:0009267;GO:0010508;GO:0010508;GO:0010629;GO:…	K09594	-	K;E;U	09YA0;12RMJ;0V63X;0UNG7;1CUGG;18VAA;KOG3715;0DJPJ;1AYUW	folliculin [Source:MGI Symbol;Acc:MGI:2442184]	216805	Q8QZS3
ENSMUSG00000027660	6667.15	5631.22	7703.08	1.36792	0.451988	0.00139167	0.0370916	3	31149207	31176726	+	9694	Skil	GO:0000122;GO:0000122;GO:0000122;GO:0000978;GO:0000978;GO:0000981;GO:0001227;GO:0001669;GO:0001825;GO:0002260;GO:0003682;GO:0005515;GO:0005515;GO:0005634;GO:0005634;GO:0005667;GO:0005737;GO:0007050;GO:0007179;GO:0007519;GO:0016605;GO:0019904;GO:0030512;GO:0030512;GO:0030512;GO:0030514;GO:0032991;GO:0042802;GO:0044877;GO:0045596;GO:0046332;GO:0046332;GO:0046332;GO:0050772;GO:0070306;GO:0070848;GO:…	K18499	-	K	12TFK;0A15U;0UMFZ;0VC1Z;18YP9;0DNTQ;1AZJK;0IFDK;1CWIQ	SKI-like [Source:MGI Symbol;Acc:MGI:106203]	20482	Q60665;Q3TB81
ENSMUSG00000044786	8226.17	5413.56	11038.8	2.0391	1.02793	0.00139463	0.0371024	7	28076209	28079678	-	3470	Zfp36	GO:0000122;GO:0000122;GO:0000165;GO:0000165;GO:0000288;GO:0000289;GO:0000932;GO:0000932;GO:0003677;GO:0003729;GO:0003729;GO:0003730;GO:0005515;GO:0005515;GO:0005634;GO:0005634;GO:0005737;GO:0005737;GO:0005829;GO:0006357;GO:0006402;GO:0006402;GO:0007275;GO:0009611;GO:0009611;GO:0010494;GO:0010494;GO:0010837;GO:0010837;GO:0019899;GO:0019901;GO:0019957;GO:0030014;GO:0031072;GO:0031086;GO:0031086;GO:…	K15308	-	S;T;K	0A0X5;0DNIG;0VBTI;1ASN6;0URVR;1CURJ;18ZEI;13UR4;KOG1677	zinc finger protein 36 [Source:MGI Symbol;Acc:MGI:99180]	22695	P22893;Q3U3D2
ENSMUSG00000020741	1177.57	1383.16	971.978	0.702724	-0.508971	0.00140611	0.0372978	11	74540321	74561673	+	6502	Cluh	GO:0003723;GO:0005737;GO:0007005;GO:0048312;GO:0003723;GO:0005737;GO:0007005;GO:0048312;	K03255	-	S;O;V	09X86;1CXAS;0DR0G;0UU3H;0V7TK;18V0W;KOG1839;12NVR;1ATKN	clustered mitochondria (cluA/CLU1) homolog [Source:MGI Symbol;Acc:MGI:1921398]	74148	Q5SW19;A0A0R4J140
ENSMUSG00000078153	1234.23	1020.33	1448.14	1.41929	0.505165	0.00140712	0.0372978	11	48836181	48837017	-	837	Psme2b	GO:0000502;GO:0005515;GO:0005654;GO:0005737;GO:0008537;GO:0010950;GO:0019884;GO:0042802;GO:0061133;GO:0061136;GO:2000045;	K06697	-	O	0A1VR;0US2U;1B22K;18U73;1CYGD;KOG4470;12U3Q;0DPHV;0VCRB	protease (prosome, macropain) activator subunit 2B [Source:MGI Symbol;Acc:MGI:1341073]	621823	P97372;Q5SVP3
ENSMUSG00000033400	250.37	311.109	189.632	0.609537	-0.714214	0.00141296	0.0373841	3	116533648	116601815	-	14023	Agl	GO:0003824;GO:0004133;GO:0004134;GO:0004134;GO:0004134;GO:0004134;GO:0004134;GO:0004135;GO:0004135;GO:0004135;GO:0004135;GO:0004135;GO:0005515;GO:0005634;GO:0005737;GO:0005737;GO:0005737;GO:0005975;GO:0005977;GO:0005978;GO:0005978;GO:0005980;GO:0005980;GO:0005980;GO:0005980;GO:0007584;GO:0007584;GO:0008152;GO:0009725;GO:0009725;GO:0016234;GO:0016529;GO:0016529;GO:0016740;GO:0016757;GO:0016787;GO:…	K01196	-	G	195C6;0UIV8;KOG3625;0V540;0DFEF;12PDT;09U4W;1CQ47;1AUYX	amylo-1,6-glucosidase, 4-alpha-glucanotransferase [Source:MGI Symbol;Acc:MGI:1924809]	77559	F8VPN4
ENSMUSG00000002489	152.598	106.145	199.052	1.87527	0.907101	0.00142285	0.0375772	16	89583999	89940657	-	10048	Tiam1	GO:0005085;GO:0007165;GO:0007264;GO:0035556;GO:0090630;GO:0005085;GO:0007264;GO:0090630;GO:0003300;GO:0005085;GO:0005085;GO:0005634;GO:0005737;GO:0005829;GO:0005829;GO:0005874;GO:0005886;GO:0005911;GO:0006915;GO:0007160;GO:0007165;GO:0007264;GO:0008017;GO:0008284;GO:0010717;GO:0010976;GO:0014069;GO:0016477;GO:0016601;GO:0019900;GO:0030335;GO:0030335;GO:0030971;GO:0031234;GO:0032092;GO:0032587;GO:…	K05731	-	W;T	0E9K2;0V3XF;1DGF1;13G75;0WJ7G;1BBJT;0ITS1;0B6GZ	T cell lymphoma invasion and metastasis 1 [Source:MGI Symbol;Acc:MGI:103306]	21844	G3UWG2;Q6P1D6;Q3UHH6;Q3UVX2
ENSMUSG00000039304	403.75	181.497	626.003	3.4491	1.78622	0.00142974	0.0376847	3	27371177	27396576	+	5266	Tnfsf10	GO:0005125;GO:0005164;GO:0005164;GO:0005576;GO:0005615;GO:0005886;GO:0006915;GO:0006955;GO:0006955;GO:0007165;GO:0008270;GO:0008270;GO:0008270;GO:0008584;GO:0016020;GO:0016020;GO:0016021;GO:0032813;GO:0032868;GO:0042802;GO:0042802;GO:0042802;GO:0043065;GO:0043065;GO:0043065;GO:0043123;GO:0043123;GO:0043280;GO:0043280;GO:0045569;GO:0046872;GO:0090200;GO:0090200;GO:2001238;GO:2001238;GO:2001238;GO:…	K04721	-	S;T	0DG92;0UR3Z;0A2TH;0IIX7;1CZVI;1B40Z;192EG;0VDZK;13CM7	tumor necrosis factor (ligand) superfamily, member 10 [Source:MGI Symbol;Acc:MGI:107414]	22035	P50592;Q3U5H0
ENSMUSG00000038059	298.305	229.449	367.16	1.60018	0.678233	0.00143232	0.0376847	18	60607263	60635059	-	6828	Smim3	GO:0005575;GO:0008150;GO:0016020;GO:0016021;GO:0042802;	-	-	S;U	0AADT;0VMBZ;0UWRE;1D5FQ;0J2JQ;13WAI;193YV;0DW5T;1B6XW	small integral membrane protein 3 [Source:MGI Symbol;Acc:MGI:1917088]	106878	Q99PE5;Q3U1M0
ENSMUSG00000002845	320.27	247.633	392.906	1.58665	0.665982	0.00143472	0.0376847	16	38379060	38412524	+	4094	Tmem39a	GO:0003674;GO:0005783;GO:0005789;GO:0005789;GO:0005789;GO:0006914;GO:0016020;GO:0016020;GO:0016021;GO:0045070;GO:1901097;GO:1901097;GO:1901097;GO:1902902;GO:1902902;GO:1902902;GO:0003674;GO:0005783;GO:0005789;GO:0005789;GO:0005789;GO:0006914;GO:0016020;GO:0016020;GO:0016021;GO:0045070;GO:1901097;GO:1901097;GO:1901097;GO:1902902;GO:1902902;GO:1902902;GO:0003674;GO:0005783;GO:0005789;GO:0005789;GO:…	-	-	S	13N1R;0DJJ5;1AYR4;0VEF6;0UHIQ;KOG3828;1CUBT;0A3JY;18XS2	transmembrane protein 39a [Source:MGI Symbol;Acc:MGI:1915096]	67846	Q9CYC3
ENSMUSG00000055204	3811.73	3209.42	4414.04	1.37534	0.459785	0.00145432	0.0381306	5	90375025	90514436	-	35542	Ankrd17	GO:0000785;GO:0000785;GO:0000785;GO:0001955;GO:0002376;GO:0003676;GO:0003682;GO:0003682;GO:0003682;GO:0003723;GO:0003723;GO:0005634;GO:0005634;GO:0005634;GO:0005634;GO:0005654;GO:0005654;GO:0005737;GO:0005737;GO:0005737;GO:0005737;GO:0006275;GO:0006275;GO:0006275;GO:0007492;GO:0031965;GO:0031965;GO:0042742;GO:0042742;GO:0042742;GO:0043123;GO:0043123;GO:0043123;GO:0045087;GO:0045087;GO:0045087;GO:…	K16726	-	T;E	KOG4369;KOG0504;12RUM;1CVJE;0UPR6;1B4BC;0DKQX;0VA60;09Z8R;18ZX1	ankyrin repeat domain 17 [Source:MGI Symbol;Acc:MGI:1932101]	81702	Q99NH0
ENSMUSG00000073418	23.9597	6.7728	41.1466	6.07527	2.60295	0.00146625	0.038374	17	34947354	34962856	-	5695	C4b	GO:0001848;GO:0001849;GO:0002376;GO:0004866;GO:0005576;GO:0005576;GO:0005576;GO:0005615;GO:0005615;GO:0005615;GO:0005615;GO:0006954;GO:0006954;GO:0006956;GO:0006956;GO:0006956;GO:0006958;GO:0010951;GO:0016064;GO:0030054;GO:0030246;GO:0030424;GO:0030424;GO:0030425;GO:0030425;GO:0042995;GO:0043025;GO:0044216;GO:0045087;GO:0045202;GO:0045202;GO:0004866;GO:0010951;	K03989	-	O	1CWM0;0V9VN;1B1T4;13MNB;KOG1366;194RX;09YXX;0DKCZ;0UJ6Y	complement component 4B (Chido blood group) [Source:MGI Symbol;Acc:MGI:88228]	12268	P01029;Q3TYN1
ENSMUSG00000025510	357.674	436.165	279.183	0.640086	-0.643662	0.00147155	0.0384432	7	141047305	141051386	+	2741	Cd151	GO:0005178;GO:0005178;GO:0005178;GO:0005515;GO:0005604;GO:0005604;GO:0005887;GO:0009986;GO:0009986;GO:0016020;GO:0016021;GO:0016021;GO:0016477;GO:0016477;GO:0030335;GO:0030335;GO:0042098;GO:0044319;GO:0044319;GO:0045807;GO:0045807;GO:0016020;GO:0016021;GO:0016021;GO:0005178;GO:0005178;GO:0005515;GO:0005604;GO:0005887;GO:0009986;GO:0016020;GO:0016021;GO:0016021;GO:0016477;GO:0016477;GO:0030335;GO:…	K06537	-	S;G	191AG;0VDB6;0UU3N;1B4PR;13HQN;KOG3882;1CYHX;0A2FD;0DQ2I	CD151 antigen [Source:MGI Symbol;Acc:MGI:1096360]	12476	O35566
ENSMUSG00000018428	130.675	170.124	91.2248	0.536224	-0.899093	0.00147731	0.0385242	11	88721618	88755412	-	4390	Akap1	GO:0003676;GO:0003723;GO:0003723;GO:0005515;GO:0005739;GO:0005739;GO:0005741;GO:0005741;GO:0005783;GO:0005811;GO:0008017;GO:0010614;GO:0016020;GO:0016021;GO:0019901;GO:0019903;GO:0030061;GO:0030346;GO:0031594;GO:0034237;GO:0035308;GO:0042308;GO:0045211;GO:0048487;GO:0060090;GO:0140374;GO:0140374;GO:0003676;GO:0003723;GO:0003723;GO:0005515;GO:0005739;GO:0005739;GO:0005741;GO:0005741;GO:0005783;GO:…	K16518	-	T	0VE98;1CRE6;0UJ5K;13MKX;1AXBB;0A3PS;0DGQB;KOG2279;18U1Q	A kinase (PRKA) anchor protein 1 [Source:MGI Symbol;Acc:MGI:104729]	11640	O08715;Q9CTT7
ENSMUSG00000020334	210.354	264.079	156.628	0.59311	-0.753628	0.00148053	0.0385391	11	53873949	53918916	-	2553	Slc22a4	GO:0000166;GO:0005524;GO:0005739;GO:0005739;GO:0006641;GO:0006811;GO:0006814;GO:0009437;GO:0015101;GO:0015171;GO:0015171;GO:0015226;GO:0015226;GO:0015293;GO:0015491;GO:0015491;GO:0015651;GO:0015651;GO:0015651;GO:0015697;GO:0015697;GO:0015697;GO:0015879;GO:0015879;GO:0016020;GO:0016021;GO:0016021;GO:0016324;GO:0016324;GO:0022857;GO:0030165;GO:0030165;GO:0042908;GO:0042908;GO:0055085;GO:0089718;GO:…	K08202	-	O;I;P;G	09TSS;0DFUK;12NNN;1ASYB;KOG0255;1951J;0UHAQ;0V4S3;1CQI0	solute carrier family 22 (organic cation transporter), member 4 [Source:MGI Symbol;Acc:MGI:1353479]	30805	Q9Z306
ENSMUSG00000042745	93.1626	125.248	61.0767	0.487644	-1.0361	0.00150158	0.0390169	2	152578171	152579330	+	1160	Id1	GO:0000122;GO:0000122;GO:0001886;GO:0005515;GO:0005515;GO:0005634;GO:0005634;GO:0005634;GO:0005634;GO:0005654;GO:0005737;GO:0005737;GO:0005737;GO:0005794;GO:0005813;GO:0007275;GO:0007507;GO:0007623;GO:0008022;GO:0008134;GO:0010628;GO:0010628;GO:0010629;GO:0030154;GO:0030509;GO:0031648;GO:0032091;GO:0032233;GO:0032922;GO:0032963;GO:0042802;GO:0043066;GO:0043392;GO:0043408;GO:0043433;GO:0043621;GO:…	K04680	-	K;L	1B3K4;0IWDR;1D308;1936K;0UV08;0VHGZ;13QEQ;0A6NU;0DTNF	inhibitor of DNA binding 1, HLH protein [Source:MGI Symbol;Acc:MGI:96396]	15901	-
ENSMUSG00000050310	1275.54	1044.05	1507.03	1.44344	0.529513	0.00151316	0.0392474	15	6737860	6829882	+	16930	Rictor	GO:0001932;GO:0001938;GO:0001938;GO:0005515;GO:0005515;GO:0005515;GO:0007275;GO:0009792;GO:0010468;GO:0018105;GO:0018105;GO:0019901;GO:0019901;GO:0030838;GO:0031532;GO:0031532;GO:0031532;GO:0031929;GO:0031932;GO:0031932;GO:0031932;GO:0031932;GO:0031932;GO:0032008;GO:0032008;GO:0032956;GO:0032956;GO:0033135;GO:0038203;GO:0042325;GO:0042325;GO:0043022;GO:0043087;GO:0043539;GO:0050727;GO:0050731;GO:…	K08267	-	D	KOG3694;0DFQI;18T15;0V5E2;1AS2N;12QR9;0UH51;09UEQ;1CQE6	RPTOR independent companion of MTOR, complex 2 [Source:MGI Symbol;Acc:MGI:1926007]	78757	Q6QI06
ENSMUSG00000031729	1944.25	1624.83	2263.68	1.39318	0.47838	0.00152449	0.0394181	8	110397957	110419892	-	7006	Ist1	GO:0000785;GO:0000785;GO:0005515;GO:0005634;GO:0005635;GO:0005737;GO:0005793;GO:0005793;GO:0005813;GO:0005813;GO:0005815;GO:0005829;GO:0005829;GO:0005856;GO:0007049;GO:0008104;GO:0008104;GO:0008104;GO:0009838;GO:0009838;GO:0015031;GO:0019076;GO:0019076;GO:0019904;GO:0019904;GO:0030496;GO:0030496;GO:0030496;GO:0031410;GO:0042802;GO:0043231;GO:0043231;GO:0044877;GO:0044877;GO:0045184;GO:0045184;GO:…	K19476	-	Z	0V80W;0UH9H;09X2N;1CT3T;12R0G;0DIDG;18TIW;KOG2027;1B0M8	increased sodium tolerance 1 homolog (yeast) [Source:MGI Symbol;Acc:MGI:1919205]	71955	Q9CX00
ENSMUSG00000015316	609.998	379.377	840.62	2.21579	1.14782	0.00152518	0.0394181	1	171594695	171628752	+	6156	Slamf1	GO:0001779;GO:0001787;GO:0002232;GO:0002250;GO:0002277;GO:0002376;GO:0002725;GO:0005515;GO:0005515;GO:0005886;GO:0006909;GO:0007155;GO:0009897;GO:0009986;GO:0009986;GO:0010759;GO:0016020;GO:0016021;GO:0016021;GO:0031338;GO:0032689;GO:0032695;GO:0032715;GO:0032720;GO:0032729;GO:0035744;GO:0038023;GO:0038023;GO:0042104;GO:0042169;GO:0042802;GO:0045087;GO:0045335;GO:0046330;GO:0046649;GO:0050790;GO:…	K06536	-	T	0UUF2;0A4QE;13MVR;1AUYF;18W0I;0DS6N;0VFJG;1D1FR;0IFKK	signaling lymphocytic activation molecule family member 1 [Source:MGI Symbol;Acc:MGI:1351314]	27218	Q9QUM4;Q544K1
ENSMUSG00000000838	1647.7	1161.95	2133.45	1.83609	0.876636	0.00154665	0.0398936	X	67722147	67761569	+	8966	Fmr1	GO:0000775;GO:0003676;GO:0003723;GO:0003723;GO:0003729;GO:0005634;GO:0005694;GO:0005730;GO:0005737;GO:0005886;GO:0006397;GO:0006417;GO:0007399;GO:0008380;GO:0010494;GO:0016020;GO:0017148;GO:0030054;GO:0030424;GO:0030425;GO:0030426;GO:0032433;GO:0036464;GO:0042995;GO:0043005;GO:0043197;GO:0043204;GO:0045202;GO:0048471;GO:0000775;GO:0003676;GO:0003723;GO:0003723;GO:0003729;GO:0005634;GO:0005694;GO:…	K15516	-	A;K	0UNY6;1ARQ8;0DGRE;09VGQ;18ZEN;0V6FZ;1CVS5;0IF9J;13HSQ	FMRP translational regulator 1 [Source:MGI Symbol;Acc:MGI:95564]	14265	Q6AXB7;E9QAT0;Q8BPK8;Q547R0
ENSMUSG00000023186	7914.14	6704.56	9123.73	1.36083	0.444482	0.00154908	0.0398936	9	38629564	38654633	+	4899	Vwa5a	GO:0005201;GO:0005654;GO:0008150;GO:0062023;GO:0005201;GO:0005654;GO:0008150;GO:0062023;	K24510	-	S;T;E	0IG85;0DM22;09X6G;0V9GH;1CRNS;18YJ8;0UQ4X;12S26;1ASRZ	von Willebrand factor A domain containing 5A [Source:MGI Symbol;Acc:MGI:1915026]	67776	Q99KC8
ENSMUSG00000037447	532.149	304.09	760.209	2.49995	1.3219	0.00156502	0.0401736	1	36346814	36363110	+	12540	Arid5a	GO:0003677;GO:0005634;GO:0003677;GO:0003677;GO:0005634;GO:0000122;GO:0000976;GO:0002062;GO:0002376;GO:0003677;GO:0003677;GO:0003682;GO:0003714;GO:0003723;GO:0005515;GO:0005634;GO:0005634;GO:0005634;GO:0005654;GO:0005667;GO:0005730;GO:0006357;GO:0008134;GO:0030331;GO:0032729;GO:0032740;GO:0032755;GO:0032760;GO:0035066;GO:0035613;GO:0042802;GO:0043565;GO:0045087;GO:0045944;GO:0046965;GO:0046966;GO:…	-	-	K	0B4GU;0WH01;0IQ79;0E8BB;1BB0Q;1DF9Z;0V35X;1977K;13D43	AT rich interactive domain 5A (MRF1-like) [Source:MGI Symbol;Acc:MGI:2443039]	214855	Q3U108
ENSMUSG00000047875	124.031	162.691	85.3711	0.524744	-0.930315	0.00156549	0.0401736	4	150171822	150190384	+	4900	Gpr157	GO:0004888;GO:0004930;GO:0004930;GO:0005886;GO:0007165;GO:0007166;GO:0007186;GO:0007186;GO:0007275;GO:0016020;GO:0016021;GO:0016021;GO:0030154;GO:0042995;GO:0048512;GO:0051482;GO:0060019;GO:0060170;	K08467	-	T	0VDNG;0A2SX;135JQ;1AY03;0DQEX;18YYQ;0UNGN;1CZGX;0IGF4	G protein-coupled receptor 157 [Source:MGI Symbol;Acc:MGI:2442046]	269604	Q8C206;Q148S2
ENSMUSG00000024098	723.286	588.939	857.632	1.45623	0.54224	0.00157193	0.0402675	17	66228967	66258221	-	5153	Twsg1	GO:0001503;GO:0001707;GO:0001818;GO:0005515;GO:0005576;GO:0005615;GO:0005615;GO:0007179;GO:0007275;GO:0007435;GO:0009888;GO:0010862;GO:0030097;GO:0030154;GO:0030509;GO:0030510;GO:0030513;GO:0030514;GO:0030900;GO:0043010;GO:0045668;GO:0050431;GO:2000515;GO:2000562;GO:0001503;GO:0001707;GO:0001818;GO:0001818;GO:0005515;GO:0005576;GO:0005615;GO:0005615;GO:0007179;GO:0007179;GO:0007275;GO:0007435;GO:…	-	-	T	1CZ46;0VDBP;1B1TF;18UUF;0UT2A;0DQ36;0A2FY;0IF1M;12Z4Q	twisted gastrulation BMP signaling modulator 1 [Source:MGI Symbol;Acc:MGI:2137520]	65960	Q9EP52
ENSMUSG00000001930	802.654	983.708	621.599	0.631894	-0.662245	0.00158318	0.0404128	6	125523737	125663642	+	16064	Vwf	GO:0005576;GO:0007596;GO:0007599;GO:0002020;GO:0005178;GO:0005518;GO:0005576;GO:0005576;GO:0005783;GO:0007155;GO:0007596;GO:0007596;GO:0007599;GO:0007599;GO:0019865;GO:0030168;GO:0031589;GO:0033093;GO:0042802;GO:0047485;GO:0051087;GO:0062023;GO:0005576;GO:0007596;GO:0007599;GO:0005576;GO:0007596;GO:0007599;	K03900	-	-	-	Von Willebrand factor [Source:MGI Symbol;Acc:MGI:98941]	22371	Q8CIZ8;E9QPU1
ENSMUSG00000024805	902.938	573.97	1231.9	2.14629	1.10184	0.00158542	0.0404128	19	36325709	36438370	+	12629	Pcgf5	GO:0000805;GO:0005515;GO:0005634;GO:0005634;GO:0005654;GO:0005813;GO:0006357;GO:0031519;GO:0031519;GO:0035102;GO:0036353;GO:0036353;GO:0045944;GO:0046872;GO:0060819;GO:0060819;GO:0000805;GO:0005515;GO:0005634;GO:0005634;GO:0005654;GO:0005813;GO:0006357;GO:0031519;GO:0031519;GO:0035102;GO:0036353;GO:0036353;GO:0045944;GO:0046872;GO:0060819;GO:0060819;GO:0005634;GO:0046872;GO:0000805;GO:0005515;GO:…	K11489	-	O;K	1CZ6A;1AZ8N;KOG2660;18U7E;09TJH;12PXY;0UNAZ;0DQ53;0V7FX	polycomb group ring finger 5 [Source:MGI Symbol;Acc:MGI:1923505]	76073	Q3UK78
ENSMUSG00000008393	614.795	469.145	760.445	1.62092	0.696809	0.00158596	0.0404128	16	8476444	8490019	-	2858	Carhsp1	GO:0000177;GO:0000932;GO:0003676;GO:0003723;GO:0003730;GO:0003730;GO:0003730;GO:0003730;GO:0005515;GO:0005737;GO:0005737;GO:0005737;GO:0005737;GO:0005829;GO:0043186;GO:0043488;GO:0043488;	-	-	J;K	1D360;0DTTV;0VHGT;0A6V3;0UV81;1B5IC;KOG3070;13R8D;192UW	calcium regulated heat stable protein 1 [Source:MGI Symbol;Acc:MGI:1196368]	52502	Q9CR86;Q5M9P7
ENSMUSG00000033671	2427.13	2036.27	2818	1.3839	0.468742	0.00162126	0.0412396	1	155720710	155849001	-	16520	Cep350	GO:0005515;GO:0005634;GO:0005737;GO:0005813;GO:0005813;GO:0005813;GO:0005814;GO:0005814;GO:0005814;GO:0005815;GO:0005819;GO:0005856;GO:0008017;GO:0034453;GO:0042995;GO:0071539;GO:1905515;GO:0005813;GO:0008017;GO:0034453;GO:0005813;GO:0008017;GO:0034453;	K16768	-	Z	0V3MG;0B5VM;0E951;1DG0Y;0ISTJ;1BBC3;13FCG;0WIIG;197DB	centrosomal protein 350 [Source:MGI Symbol;Acc:MGI:1921331]	74081	E9Q309
ENSMUSG00000020152	14259.2	11637.5	16881	1.45057	0.536621	0.00162758	0.0413197	11	20012304	20062913	-	5204	Actr2	GO:0000166;GO:0003779;GO:0005200;GO:0005200;GO:0005515;GO:0005524;GO:0005634;GO:0005634;GO:0005634;GO:0005737;GO:0005737;GO:0005737;GO:0005829;GO:0005856;GO:0005885;GO:0005885;GO:0005885;GO:0005885;GO:0005938;GO:0007163;GO:0008092;GO:0008092;GO:0008306;GO:0008356;GO:0010592;GO:0010592;GO:0010592;GO:0014069;GO:0014069;GO:0016344;GO:0016482;GO:0030027;GO:0030027;GO:0030036;GO:0030478;GO:0033206;GO:…	K17260	-	Z	0V998;1CUIG;12TIU;18W7S;0DJRD;KOG0677;1AV6V;09YBP;0UPEM	ARP2 actin-related protein 2 [Source:MGI Symbol;Acc:MGI:1913963]	66713	P61161;Q5SW83
ENSMUSG00000030990	526.516	407.805	645.228	1.5822	0.661931	0.0016301	0.0413197	7	101859415	101887774	+	4529	Pgap2	GO:0000139;GO:0016020;GO:0016021;GO:0000139;GO:0000139;GO:0000139;GO:0005783;GO:0005783;GO:0005789;GO:0005789;GO:0005789;GO:0005794;GO:0005794;GO:0006506;GO:0006506;GO:0006506;GO:0016020;GO:0016021;GO:0072659;GO:0000139;GO:0016020;GO:0016021;GO:0000139;GO:0006506;GO:0016020;GO:0016021;GO:0000139;GO:0006506;GO:0016020;GO:0016021;GO:0000139;GO:0000139;GO:0000139;GO:0005783;GO:0005783;GO:0005789;GO:…	K23552	-	T;U	1AUFK;0DGBH;130X6;0UI1X;09V23;18SRT;0V61S;KOG3979;1CR0X	post-GPI attachment to proteins 2 [Source:MGI Symbol;Acc:MGI:2385286]	233575	Q3TQR0;Q3U6W8
ENSMUSG00000027900	1870.64	1479.95	2261.32	1.52797	0.611612	0.00163461	0.0413616	3	106455114	106483206	+	3758	Dram2	GO:0001917;GO:0003674;GO:0005737;GO:0005737;GO:0005764;GO:0005764;GO:0005764;GO:0005764;GO:0005765;GO:0005794;GO:0005794;GO:0005886;GO:0006914;GO:0006915;GO:0007601;GO:0007601;GO:0007601;GO:0010506;GO:0010506;GO:0010506;GO:0010506;GO:0016020;GO:0016021;GO:0016324;GO:0043231;GO:0043231;GO:0045494;GO:0045494;GO:0045494;GO:0010506;GO:0016020;GO:0016021;GO:0001917;GO:0003674;GO:0005737;GO:0005764;GO:…	K21956	-	S;T	0V835;KOG4320;1AWFA;0DIFM;1CT6C;19144;09X4N;13IN2;0UKZA	DNA-damage regulated autophagy modulator 2 [Source:MGI Symbol;Acc:MGI:1914421]	67171	Q9CR48
ENSMUSG00000025626	465.012	360.881	569.143	1.57709	0.657267	0.00164156	0.0414526	X	52001143	52045820	+	6946	Phf6	GO:0000122;GO:0000775;GO:0000776;GO:0000777;GO:0001835;GO:0003677;GO:0005634;GO:0005634;GO:0005634;GO:0005654;GO:0005654;GO:0005694;GO:0005730;GO:0005730;GO:0005730;GO:0006357;GO:0015631;GO:0019899;GO:0042393;GO:0042393;GO:0042826;GO:0042826;GO:0043021;GO:0046872;GO:0051219;GO:0097110;GO:0046872;GO:0000122;GO:0000775;GO:0000776;GO:0000777;GO:0001835;GO:0003677;GO:0005634;GO:0005634;GO:0005634;GO:…	K23310	-	K	1DF4T;1BAYD;0V32H;0WGPZ;0IPTE;0E85V;0B47R;13CQ8	PHD finger protein 6 [Source:MGI Symbol;Acc:MGI:1918248]	70998	Q9D4J7
ENSMUSG00000020124	2123.63	1683.38	2563.88	1.52306	0.606969	0.00164392	0.0414526	10	122940911	123032900	-	16599	Usp15	GO:0003824;GO:0004197;GO:0004197;GO:0004197;GO:0004843;GO:0004843;GO:0004843;GO:0004843;GO:0005160;GO:0005160;GO:0005634;GO:0005634;GO:0005634;GO:0005634;GO:0005737;GO:0005737;GO:0005737;GO:0005739;GO:0005829;GO:0005829;GO:0005886;GO:0006508;GO:0006511;GO:0007179;GO:0007179;GO:0007179;GO:0008233;GO:0008234;GO:0016579;GO:0016579;GO:0016579;GO:0016579;GO:0016787;GO:0018215;GO:0030509;GO:0030509;GO:…	K21343	EC:3.4.19.12	O	1CQTP;12QDF;1947Q;0V59F;KOG1870;0DG43;1AXTV;0UHR8;09UA9	ubiquitin specific peptidase 15 [Source:MGI Symbol;Acc:MGI:101857]	14479	Q8R5H1;Q3TSV9
ENSMUSG00000039007	395.443	311.681	479.204	1.53748	0.620568	0.0016474	0.0414682	15	33083275	33594698	+	5026	Cpq	GO:0004180;GO:0005576;GO:0005615;GO:0005615;GO:0005615;GO:0005615;GO:0005615;GO:0005737;GO:0005737;GO:0005764;GO:0005764;GO:0005764;GO:0005783;GO:0005783;GO:0005783;GO:0005794;GO:0005794;GO:0005794;GO:0006508;GO:0006508;GO:0006508;GO:0006508;GO:0006590;GO:0006590;GO:0006590;GO:0006590;GO:0008233;GO:0008237;GO:0016787;GO:0042246;GO:0042246;GO:0042803;GO:0042803;GO:0043171;GO:0043171;GO:0043171;GO:…	K01302	EC:3.4.17.-	O;P;E	13HPU;09T8P;KOG2195;18X70;1B0PM;0DMNI;0UPHE;0V47M;1CWI0	carboxypeptidase Q [Source:MGI Symbol;Acc:MGI:1889205]	54381	Q9WVJ3
ENSMUSG00000038774	2276.76	1648.55	2904.96	1.76213	0.817317	0.00166453	0.0418267	10	50468765	50727581	+	16685	Ascc3	GO:0000166;GO:0003676;GO:0003678;GO:0003723;GO:0004386;GO:0005524;GO:0005524;GO:0005634;GO:0005634;GO:0005634;GO:0005634;GO:0005829;GO:0005829;GO:0006281;GO:0006307;GO:0006307;GO:0006307;GO:0006974;GO:0008283;GO:0008283;GO:0008283;GO:0016607;GO:0016787;GO:0032508;GO:0032508;GO:0032508;GO:0043138;GO:0043138;GO:0043138;GO:0043138;GO:0099053;GO:0099053;	K18663	EC:3.6.4.12	A;K;L	1CPNQ;0UQZZ;18UIJ;KOG0952;1B2N0;12QFR;0V8FP;09XHN;0DMSK	activating signal cointegrator 1 complex subunit 3 [Source:MGI Symbol;Acc:MGI:1925237]	77987	E9PZJ8
ENSMUSG00000037062	6049.92	5121.56	6978.29	1.36253	0.44629	0.0016735	0.0419795	3	144389439	144426096	-	7467	Sh3glb1	GO:0000139;GO:0000421;GO:0000421;GO:0005504;GO:0005515;GO:0005737;GO:0005737;GO:0005737;GO:0005739;GO:0005740;GO:0005741;GO:0005769;GO:0005783;GO:0005794;GO:0005829;GO:0006654;GO:0006915;GO:0006915;GO:0008021;GO:0008289;GO:0008654;GO:0010508;GO:0010508;GO:0016020;GO:0016020;GO:0030496;GO:0030496;GO:0031334;GO:0031410;GO:0032465;GO:0032801;GO:0032991;GO:0034198;GO:0042149;GO:0042171;GO:0042802;GO:…	K11248	-	T	0V69D;0DGII;12QUH;KOG3725;1CR8C;18SSW;0UKYH;1AWZ4;09VA5	SH3-domain GRB2-like B1 (endophilin) [Source:MGI Symbol;Acc:MGI:1859730]	54673	Q9JK48
ENSMUSG00000035448	254.455	193.951	314.959	1.62391	0.699469	0.00168024	0.0420756	9	123822009	123831726	+	3272	Ccr3	GO:0001938;GO:0002551;GO:0004930;GO:0004930;GO:0004950;GO:0005515;GO:0005615;GO:0005737;GO:0005768;GO:0005886;GO:0005886;GO:0005886;GO:0006935;GO:0006935;GO:0006954;GO:0006954;GO:0006955;GO:0007165;GO:0007186;GO:0007186;GO:0007204;GO:0009897;GO:0016020;GO:0016021;GO:0016021;GO:0016493;GO:0016493;GO:0016493;GO:0019722;GO:0019957;GO:0019957;GO:0019957;GO:0019957;GO:0035476;GO:0045766;GO:0045766;GO:…	K04178	-	T	KOG3656;1CRZB;0V6YN;0UJ3V;09T6C;18ZDI;13K12;0DH9A;1AUUN	chemokine (C-C motif) receptor 3 [Source:MGI Symbol;Acc:MGI:104616]	12771	P51678;Q3U5L7
ENSMUSG00000022584	159.842	115.592	204.092	1.76562	0.820172	0.00168627	0.0421539	15	74980007	74983819	-	2740	Ly6c2	GO:0005886;GO:0005886;GO:0009986;GO:0016020;GO:0030550;GO:0031225;GO:0033130;GO:0045202;GO:0095500;GO:2000272;GO:0005886;GO:0005886;GO:0009986;GO:0016020;GO:0030550;GO:0031225;GO:0033130;GO:0045202;GO:0095500;GO:2000272;GO:0005886;GO:0005886;GO:0009986;GO:0016020;GO:0030550;GO:0031225;GO:0033130;GO:0045202;GO:0095500;GO:2000272;	-	-	O	0JI0Q;0DWX0;1D5JV;0AANN;0VPCV;0UWSI;1B8E1;14BGS	lymphocyte antigen 6 complex, locus C2 [Source:MGI Symbol;Acc:MGI:3712069]	100041546	P0CW03
ENSMUSG00000079737	131.433	92.304	170.563	1.84784	0.885837	0.00169599	0.0422382	16	13489793	13496252	+	1705	3110001I22Rik	GO:0003674;GO:0005654;GO:0045814;GO:0045892;GO:0097355;	-	-	-	-	RIKEN cDNA 3110001I22 gene [Source:MGI Symbol;Acc:MGI:1913848]	-	-
ENSMUSG00000004591	1269.71	1015.99	1523.43	1.49945	0.584436	0.00169727	0.0422382	3	142496663	142587765	-	12877	Pkn2	GO:0000166;GO:0004672;GO:0004674;GO:0004674;GO:0004674;GO:0004674;GO:0004674;GO:0004697;GO:0004698;GO:0005515;GO:0005524;GO:0005524;GO:0005634;GO:0005634;GO:0005634;GO:0005654;GO:0005654;GO:0005737;GO:0005737;GO:0005737;GO:0005813;GO:0005813;GO:0005829;GO:0005829;GO:0005856;GO:0005886;GO:0005886;GO:0006468;GO:0006468;GO:0006468;GO:0006468;GO:0006915;GO:0007049;GO:0007155;GO:0007165;GO:0010631;GO:…	K23691	EC:2.7.11.13	T;K	195IA;0DF0G;KOG0694;0V4PD;1B3TW;0UG4M;09TQ6;1CPQ7;12NBF	protein kinase N2 [Source:MGI Symbol;Acc:MGI:109211]	109333	Q8BWW9
ENSMUSG00000079523	1407.87	1171.82	1643.91	1.40287	0.488385	0.00169838	0.0422382	6	72934330	72935731	-	1276	Tmsb10	GO:0003779;GO:0003785;GO:0003785;GO:0003785;GO:0003785;GO:0005737;GO:0005737;GO:0005737;GO:0005856;GO:0007015;GO:0007015;GO:0030036;GO:0030334;GO:0042989;GO:0003779;GO:0003785;GO:0003785;GO:0003785;GO:0003785;GO:0005737;GO:0005737;GO:0005737;GO:0005856;GO:0007015;GO:0007015;GO:0030036;GO:0030334;GO:0042989;GO:0003779;GO:0003785;GO:0003785;GO:0003785;GO:0003785;GO:0005737;GO:0005737;GO:0005737;GO:…	K13785	-	N	KOG4794;0VMP2;1B6ZT;0UWRK;1D5JK;0AAQ8;0DW9W;13XHY;1943E	thymosin, beta 10 [Source:MGI Symbol;Acc:MGI:109146]	19240	Q6ZWY8;A6H6H4
ENSMUSG00000061288	1506.42	1247.97	1764.87	1.41419	0.499973	0.00170423	0.0423111	5	117258194	117413284	+	11159	Taok3	GO:0000165;GO:0000165;GO:0000165;GO:0000166;GO:0004672;GO:0004674;GO:0004674;GO:0004674;GO:0004674;GO:0005524;GO:0005524;GO:0005737;GO:0005737;GO:0006281;GO:0006468;GO:0006468;GO:0006468;GO:0006974;GO:0006974;GO:0006974;GO:0007095;GO:0007095;GO:0007095;GO:0007165;GO:0016301;GO:0016310;GO:0016740;GO:0016740;GO:0016740;GO:0031098;GO:0032147;GO:0032874;GO:0032874;GO:0032874;GO:0043507;GO:0043507;GO:…	K04429	EC:2.7.11.1	T;D	0DJDF;09UWW;0UFHM;1AXJT;0V5WQ;1CU5Q;12NZY;KOG0577;18YJ6	TAO kinase 3 [Source:MGI Symbol;Acc:MGI:3041177]	330177	Q8BYC6
ENSMUSG00000034118	784.815	505.683	1063.95	2.10398	1.07312	0.00171805	0.0425811	5	130102167	130164570	+	2789	Tpst1	GO:0000139;GO:0005794;GO:0005794;GO:0006478;GO:0006478;GO:0006478;GO:0006478;GO:0008146;GO:0008476;GO:0008476;GO:0008476;GO:0008476;GO:0016020;GO:0016021;GO:0016740;GO:0018215;GO:0030173;GO:0030173;GO:0042803;GO:0000139;GO:0005794;GO:0005794;GO:0006478;GO:0006478;GO:0006478;GO:0006478;GO:0008146;GO:0008476;GO:0008476;GO:0008476;GO:0008476;GO:0016020;GO:0016021;GO:0016740;GO:0018215;GO:0030173;GO:…	K01021	EC:2.8.2.20	O	12RZS;0DHP3;0UGRF;1CSDJ;KOG3988;1AYG9;09WDW;0V7C7;18YFZ	protein-tyrosine sulfotransferase 1 [Source:MGI Symbol;Acc:MGI:1298231]	22021	O70281;Q4FK50
ENSMUSG00000028639	4675.65	5399.11	3952.18	0.732006	-0.450072	0.00172222	0.0426117	4	119135178	119151801	-	2531	Ybx1	GO:0000122;GO:0001701;GO:0002039;GO:0003676;GO:0003676;GO:0003677;GO:0003682;GO:0003697;GO:0003723;GO:0003723;GO:0003729;GO:0003729;GO:0005515;GO:0005515;GO:0005576;GO:0005634;GO:0005634;GO:0005634;GO:0005689;GO:0005737;GO:0005737;GO:0005829;GO:0006355;GO:0006355;GO:0006397;GO:0008134;GO:0008284;GO:0008380;GO:0008544;GO:0010468;GO:0010494;GO:0010494;GO:0017148;GO:0030425;GO:0031965;GO:0035198;GO:…	K09276	-	J;K	1CSAG;0UGGA;1AYS0;12U7H;0V790;09WAR;0DHK5;KOG3070;18T35	Y box protein 1 [Source:MGI Symbol;Acc:MGI:99146]	22608	P62960;Q3UBT1
ENSMUSG00000033352	1383.14	1151	1615.28	1.40337	0.488899	0.00172927	0.0426517	11	65579069	65679123	-	4664	Map2k4	GO:0000165;GO:0000166;GO:0000187;GO:0001934;GO:0001934;GO:0004672;GO:0004674;GO:0004708;GO:0004708;GO:0004708;GO:0004708;GO:0004713;GO:0005515;GO:0005515;GO:0005524;GO:0005524;GO:0005524;GO:0005524;GO:0005634;GO:0005634;GO:0005634;GO:0005737;GO:0005829;GO:0005829;GO:0005829;GO:0006468;GO:0006468;GO:0006468;GO:0006915;GO:0007254;GO:0007254;GO:0007257;GO:0007257;GO:0007257;GO:0008545;GO:0008545;GO:…	K04430	EC:2.7.12.2	T	KOG0984;1CV08;0V5YT;09YRU;0UM1D;12S0B;0DK69;18VED;1AUCX	mitogen-activated protein kinase kinase 4 [Source:MGI Symbol;Acc:MGI:1346869]	26398	P47809;Q543X6
ENSMUSG00000020393	2385.7	2004	2767.4	1.38094	0.465651	0.00172972	0.0426517	11	5141552	5211558	-	7722	Kremen1	GO:0003674;GO:0005886;GO:0006915;GO:0016020;GO:0016020;GO:0016021;GO:0016055;GO:0016055;GO:0030279;GO:0043025;GO:0048681;GO:0060173;GO:0090090;	K23091	-	O;T;G	0V3A2;0WHDY;1979F;1DFG7;0IR07;0E8I3;0B4V5;1BB3U;13DQD	kringle containing transmembrane protein 1 [Source:MGI Symbol;Acc:MGI:1933988]	84035	Q99N43
ENSMUSG00000044583	4574.19	2859.74	6288.64	2.19902	1.13686	0.00173441	0.0426947	X	166087925	166113554	-	4082	Tlr7	GO:0001774;GO:0001932;GO:0002224;GO:0002224;GO:0002376;GO:0002755;GO:0003725;GO:0003725;GO:0003725;GO:0003727;GO:0003727;GO:0004888;GO:0005515;GO:0005737;GO:0005737;GO:0005764;GO:0005768;GO:0005783;GO:0005789;GO:0005886;GO:0005886;GO:0005886;GO:0006954;GO:0006955;GO:0006955;GO:0007165;GO:0007249;GO:0007252;GO:0007252;GO:0008144;GO:0010008;GO:0016020;GO:0016021;GO:0016021;GO:0031410;GO:0032009;GO:…	K05404	-	T	0DPQE;09X81;1CXIA;1ARUM;0UT1F;18WAY;0VCXS;13DH5;KOG4641	toll-like receptor 7 [Source:MGI Symbol;Acc:MGI:2176882]	170743	P58681;Q548J0
ENSMUSG00000041598	771.761	564.697	978.826	1.73337	0.793577	0.0017393	0.0427425	11	113617676	113642707	-	3643	Cdc42ep4	GO:0005515;GO:0005737;GO:0005737;GO:0005737;GO:0005856;GO:0005856;GO:0005886;GO:0005886;GO:0005886;GO:0005912;GO:0005912;GO:0007266;GO:0007266;GO:0008360;GO:0008360;GO:0008360;GO:0008360;GO:0012505;GO:0015629;GO:0015629;GO:0015630;GO:0015630;GO:0016020;GO:0030838;GO:0031267;GO:0031274;GO:0031274;GO:0031274;GO:0045335;GO:0071346;GO:0005515;GO:0005737;GO:0005737;GO:0005737;GO:0005856;GO:0005856;GO:…	-	-	T;U	09YDT;0IJDS;191AS;0UM09;0DG0E;0V9BF;1CQQ0;1B37N;13IUU	CDC42 effector protein (Rho GTPase binding) 4 [Source:MGI Symbol;Acc:MGI:1929760]	56699	Q9JM96
ENSMUSG00000035299	52.1628	29.7492	74.5764	2.50684	1.32587	0.001752	0.0429546	X	168468195	168788732	+	6720	Mid1	GO:0005515;GO:0005515;GO:0005737;GO:0005737;GO:0005856;GO:0005874;GO:0005874;GO:0005881;GO:0007026;GO:0008017;GO:0008270;GO:0015630;GO:0016740;GO:0019899;GO:0031625;GO:0032874;GO:0035372;GO:0042802;GO:0042803;GO:0046872;GO:0051219;GO:0005874;GO:0005515;GO:0005515;GO:0005737;GO:0005737;GO:0005856;GO:0005874;GO:0005874;GO:0005881;GO:0007026;GO:0008017;GO:0008270;GO:0015630;GO:0016740;GO:0019899;GO:…	K08285	EC:2.3.2.27	Z;O	KOG2177;1AVUG;12SUE;0V7PS;1CSRN;0DI0Y;0UMEW;09WRC	midline 1 [Source:MGI Symbol;Acc:MGI:1100537]	17318	O70583
ENSMUSG00000046062	3651.25	2880.05	4422.46	1.53555	0.618758	0.00175385	0.0429546	1	133058881	133067521	+	5594	Ppp1r15b	GO:0000164;GO:0000164;GO:0000164;GO:0000164;GO:0001933;GO:0001933;GO:0005783;GO:0006417;GO:0006446;GO:0006979;GO:0006983;GO:0019888;GO:0019888;GO:0032516;GO:0034976;GO:0034976;GO:0042542;GO:0070262;GO:1903912;	K17558	-	T	12RRI;1CQDE;0IJ9C;0UH3J;0V5DE;09UDY;1ASSB;0DFPU;18WS6	protein phosphatase 1, regulatory subunit 15B [Source:MGI Symbol;Acc:MGI:2444211]	108954	Q8BFW3
ENSMUSG00000020128	2129.9	1684.31	2575.48	1.5291	0.61268	0.00176795	0.0432269	11	21189281	21271136	+	7515	Vps54	GO:0000938;GO:0000938;GO:0000938;GO:0000938;GO:0000938;GO:0005654;GO:0005654;GO:0005794;GO:0005794;GO:0005794;GO:0005802;GO:0005802;GO:0005802;GO:0005829;GO:0006896;GO:0007041;GO:0007041;GO:0015031;GO:0016020;GO:0016020;GO:0019905;GO:0040008;GO:0042147;GO:0042147;GO:0042147;GO:0042147;GO:0048471;GO:0048471;GO:0048873;GO:0050881;GO:0060052;GO:0000938;GO:0000938;GO:0000938;GO:0000938;GO:0005654;GO:…	K17600	-	U	1CRAK;0URTH;0V6BE;12S0Q;18Y4S;KOG2115;0DGKR;09VCA;1AX6S	VPS54 GARP complex subunit [Source:MGI Symbol;Acc:MGI:2178798]	245944	Q5SPW0;Q91ZJ4
ENSMUSG00000020790	4607.72	3898.69	5316.74	1.36372	0.447551	0.00177769	0.0433919	11	72580832	72662972	+	11332	Ankfy1	GO:0005737;GO:0005768;GO:0005768;GO:0005769;GO:0005829;GO:0006897;GO:0010008;GO:0016020;GO:0016020;GO:0016197;GO:0030904;GO:0031267;GO:0031410;GO:0034058;GO:0042147;GO:0043231;GO:0044354;GO:0046872;GO:0046872;GO:0048549;GO:0090160;GO:1901981;GO:0005737;GO:0005768;GO:0005768;GO:0005768;GO:0005769;GO:0005769;GO:0005829;GO:0006897;GO:0010008;GO:0016020;GO:0016020;GO:0016020;GO:0016197;GO:0016197;GO:…	K20129	-	S;T;E;U	KOG4591;1B42Z;KOG0504;0A028;18TDU;0VAYM;12TZ7;0DMNV;1CWIC;0UQVU	ankyrin repeat and FYVE domain containing 1 [Source:MGI Symbol;Acc:MGI:1337008]	11736	Q810B6
ENSMUSG00000040528	1841.49	1387.19	2295.8	1.655	0.726835	0.0018114	0.0440351	11	106642052	106659620	+	2474	Milr1	GO:0004888;GO:0005515;GO:0005576;GO:0005886;GO:0005887;GO:0005887;GO:0007166;GO:0016020;GO:0016021;GO:0033004;GO:0033004;GO:0043303;GO:0043303;GO:0098742;GO:0033004;GO:0043303;GO:0004888;GO:0005515;GO:0005576;GO:0005886;GO:0005887;GO:0005887;GO:0007166;GO:0016020;GO:0016021;GO:0033004;GO:0033004;GO:0043303;GO:0043303;GO:0098742;GO:0004888;GO:0005515;GO:0005576;GO:0005886;GO:0005887;GO:0005887;GO:…	-	-	T	0A0DZ;1B5BM;0VBA6;0UR9F;0DN0S;1941G;0IGSD;13I24;1CWWX	mast cell immunoglobulin like receptor 1 [Source:MGI Symbol;Acc:MGI:2685731]	380732	Q3TB92
ENSMUSG00000020978	107.536	141.834	73.2381	0.516364	-0.953541	0.0018131	0.0440351	12	69343455	69357461	+	5438	Klhdc2	GO:0005515;GO:0005634;GO:0005654;GO:0005654;GO:0008150;GO:0016604;GO:0016604;GO:0031965;GO:0031965;	-	-	S;O;T	0VAF1;12T7T;09ZHT;KOG0379;1CVVQ;0UNFB;0DM0U;1AXYY;1946P	kelch domain containing 2 [Source:MGI Symbol;Acc:MGI:1916804]	69554	Q4G5Y1
ENSMUSG00000025059	2472.08	1833.27	3110.89	1.69691	0.762908	0.00181316	0.0440351	X	84745543	84820425	-	7743	Gk	GO:0000166;GO:0004370;GO:0004370;GO:0004370;GO:0004370;GO:0005524;GO:0005634;GO:0005737;GO:0005739;GO:0005739;GO:0005739;GO:0005741;GO:0005975;GO:0006071;GO:0006071;GO:0006071;GO:0006072;GO:0006641;GO:0016020;GO:0016301;GO:0016310;GO:0016310;GO:0016740;GO:0016773;GO:0016773;GO:0019217;GO:0019563;GO:0042393;GO:0042593;GO:0045471;GO:0046167;GO:0000166;GO:0004370;GO:0004370;GO:0004370;GO:0004370;GO:…	K00864	EC:2.7.1.30	G	KOG2517;18WPH;0UFQA;0DHQ5;09UHN;1ARJJ;0V5GV;12P47;1CSEH	glycerol kinase [Source:MGI Symbol;Acc:MGI:106594]	14933	Q64516;Q3TEN9;Q3TET2
ENSMUSG00000042396	4857.2	4112.14	5602.26	1.36237	0.446121	0.0018319	0.0444158	9	48400001	48406599	-	4941	Rbm7	GO:0003676;GO:0003723;GO:0000381;GO:0003676;GO:0003723;GO:0003723;GO:0003727;GO:0005515;GO:0005634;GO:0005634;GO:0005634;GO:0005654;GO:0005654;GO:0016076;GO:0017069;GO:0051321;GO:0071889;GO:0071889;GO:0097157;GO:0003676;	K13188	-	S	1B2CH;0DQ1U;1CZ2I;KOG4454;18YA2;0UME0;0A2ES;13WPK;0VDAE	RNA binding motif protein 7 [Source:MGI Symbol;Acc:MGI:1914260]	67010	Q9CQT2;Q14A95
ENSMUSG00000022150	1343.49	896.177	1790.8	1.99826	0.998747	0.00184981	0.0447548	15	6329269	6470193	+	7342	Dab2	GO:0000122;GO:0001650;GO:0001934;GO:0005886;GO:0005905;GO:0006897;GO:0008022;GO:0010718;GO:0010862;GO:0016192;GO:0030136;GO:0030335;GO:0030511;GO:0032091;GO:0032436;GO:0035026;GO:0035615;GO:0038024;GO:0043066;GO:0043231;GO:0045807;GO:0045944;GO:0046332;GO:0060391;GO:0060766;GO:0090090;GO:1903077;GO:2000096;GO:2000370;GO:2000643;	K12475	-	T	1AWF7;1CXXC;0A1CA;0UFXS;13HB9;0VC7V;18Z19;0DFNJ;KOG3535	disabled 2, mitogen-responsive phosphoprotein [Source:MGI Symbol;Acc:MGI:109175]	13132	P98078;Q3TRE6;Q3TN55;A0A0R4J104
ENSMUSG00000004043	1632.54	1363.62	1901.46	1.39442	0.479664	0.0018525	0.0447548	11	100750177	100775995	+	7133	Stat5a	GO:0000785;GO:0000978;GO:0000978;GO:0000981;GO:0001228;GO:0001553;GO:0001779;GO:0001938;GO:0003677;GO:0003677;GO:0003677;GO:0003690;GO:0003700;GO:0003700;GO:0005515;GO:0005515;GO:0005515;GO:0005634;GO:0005634;GO:0005634;GO:0005654;GO:0005654;GO:0005737;GO:0005737;GO:0005829;GO:0005829;GO:0006355;GO:0006357;GO:0006357;GO:0006366;GO:0006952;GO:0007165;GO:0007259;GO:0007259;GO:0007565;GO:0007595;GO:…	K11223	-	K	1B289;12PE2;KOG3667;194UJ;0UP21;09VPA;0V6N6;0DGXQ;1CRMY	signal transducer and activator of transcription 5A [Source:MGI Symbol;Acc:MGI:103036]	20850	P42230;Q9JIA0;Q3UZ79
ENSMUSG00000021067	1200.15	995.723	1404.57	1.4106	0.496312	0.00185611	0.0447548	12	70011786	70033776	-	5265	Sav1	GO:0001942;GO:0005515;GO:0005634;GO:0005634;GO:0005634;GO:0005737;GO:0005737;GO:0005737;GO:0005737;GO:0005829;GO:0005829;GO:0005886;GO:0005911;GO:0006915;GO:0007165;GO:0007165;GO:0030159;GO:0030216;GO:0030425;GO:0031697;GO:0035329;GO:0035329;GO:0035329;GO:0042127;GO:0042802;GO:0042802;GO:0043065;GO:0043113;GO:0045600;GO:0046332;GO:0046620;GO:0050680;GO:0050821;GO:0051091;GO:0060044;GO:0060090;GO:…	K16686	-	S;T;E	12Q6S;0DHX1;0UK85;09TGV;1CSMR;1B0QC;18S04;0V7K4;KOG1891	salvador family WW domain containing 1 [Source:MGI Symbol;Acc:MGI:1927144]	64010	Q8VEB2
ENSMUSG00000026872	13865.5	11798.8	15932.2	1.35032	0.433305	0.00185823	0.0447548	2	44873644	45007407	-	20203	Zeb2	GO:0000122;GO:0000122;GO:0000785;GO:0000785;GO:0000978;GO:0000981;GO:0001227;GO:0001228;GO:0001755;GO:0001756;GO:0001843;GO:0003677;GO:0003677;GO:0005634;GO:0005634;GO:0005634;GO:0005654;GO:0005730;GO:0005829;GO:0006357;GO:0007417;GO:0021540;GO:0021766;GO:0021846;GO:0021957;GO:0030177;GO:0043507;GO:0043565;GO:0045636;GO:0045944;GO:0045944;GO:0046872;GO:0048023;GO:0048066;GO:0048598;GO:0048668;GO:…	K23560	-	K	196PP;0AZQW;14SV2;1DC99;0E599;0V0SF;0WC72;1B9S4;0KCPI	zinc finger E-box binding homeobox 2 [Source:MGI Symbol;Acc:MGI:1344407]	24136	Q9R0G7;Q3URW5;Q8BSG9
ENSMUSG00000028494	6680.49	5673.47	7687.5	1.35499	0.438283	0.00186618	0.044872	4	86566623	86588297	-	3512	Plin2	GO:0005515;GO:0005515;GO:0005634;GO:0005737;GO:0005811;GO:0005811;GO:0005811;GO:0005811;GO:0005811;GO:0005829;GO:0005829;GO:0005886;GO:0010890;GO:0014070;GO:0015909;GO:0016020;GO:0019915;GO:0019915;GO:0042493;	K17284	-	U	1CWV7;0A0CC;0DMZ6;0VB8H;18SFU;0UHNB;13HK9;0IJG1;1AT8Z	perilipin 2 [Source:MGI Symbol;Acc:MGI:87920]	11520	P43883;Q3U711
ENSMUSG00000020255	586.563	698.352	474.773	0.679848	-0.556716	0.00187279	0.0449563	10	83196085	83324369	+	123179	D10Wsu102e	GO:0003674;GO:0005575;GO:0008150;	-	-	S;L	0VHIM;0UV7J;0DR4J;0J22I;1B574;0A76F;1D22G;193B4;13V04	DNA segment, Chr 10, Wayne State University 102, expressed [Source:MGI Symbol;Acc:MGI:106381]	28109	Q9CX66
ENSMUSG00000040274	1918.4	1608.56	2228.25	1.38525	0.470145	0.0018762	0.0449636	5	3391485	3581008	+	13989	Cdk6	GO:0000122;GO:0000166;GO:0000307;GO:0001726;GO:0001726;GO:0001954;GO:0002244;GO:0003323;GO:0004672;GO:0004674;GO:0004693;GO:0004693;GO:0004693;GO:0004693;GO:0005515;GO:0005515;GO:0005524;GO:0005524;GO:0005524;GO:0005634;GO:0005634;GO:0005634;GO:0005654;GO:0005737;GO:0005737;GO:0005813;GO:0005813;GO:0005815;GO:0005829;GO:0005856;GO:0006468;GO:0006468;GO:0006468;GO:0007049;GO:0007219;GO:0008353;GO:…	K02091	EC:2.7.11.22	D	0UQDM;194A7;1AVZ7;KOG0594;12R83;0V9FS;1CWF3;0A007;0DMJU	cyclin-dependent kinase 6 [Source:MGI Symbol;Acc:MGI:1277162]	12571	Q64261;Q0VBK8
ENSMUSG00000039994	76.6877	39.5959	113.78	2.87352	1.52282	0.00189272	0.045234	10	128067934	128088810	+	6115	Timeless	GO:0000076;GO:0000122;GO:0000785;GO:0000785;GO:0000785;GO:0001658;GO:0001822;GO:0002009;GO:0003677;GO:0005515;GO:0005515;GO:0005515;GO:0005634;GO:0005634;GO:0005634;GO:0005654;GO:0005654;GO:0005694;GO:0006281;GO:0006281;GO:0006974;GO:0006974;GO:0006974;GO:0007049;GO:0007275;GO:0007623;GO:0030324;GO:0031298;GO:0035861;GO:0035861;GO:0035861;GO:0042752;GO:0042752;GO:0042752;GO:0042753;GO:0043111;GO:…	K03155	-	K;L	09U3E;KOG1974;1B1TE;0UTVM;1CZ85;12NCY;0V52I;0DQNZ;18TFJ	timeless circadian clock 1 [Source:MGI Symbol;Acc:MGI:1321393]	21853	Q9R1X4
ENSMUSG00000020063	436.595	347.544	525.647	1.51246	0.596899	0.00189642	0.045234	10	63154784	63217483	-	5331	Sirt1	GO:0000012;GO:0000012;GO:0000012;GO:0000122;GO:0000122;GO:0000122;GO:0000122;GO:0000183;GO:0000183;GO:0000720;GO:0000720;GO:0000720;GO:0000731;GO:0000785;GO:0000785;GO:0000785;GO:0000791;GO:0000791;GO:0000791;GO:0000791;GO:0000792;GO:0000792;GO:0000792;GO:0000792;GO:0000978;GO:0001525;GO:0001525;GO:0001525;GO:0001542;GO:0001650;GO:0001678;GO:0001934;GO:0001938;GO:0001938;GO:0002039;GO:0002039;GO:…	K11411	EC:2.3.1.286	K;B	09TMC;1CSMZ;12NA0;0V4KC;1AVAG;18WQ3;0DHX8;0UJTM;KOG2684	sirtuin 1 [Source:MGI Symbol;Acc:MGI:2135607]	93759	Q923E4;Q53Z05;Q3USJ2;Q3USY7
ENSMUSG00000031216	388.524	269.479	507.57	1.88353	0.913437	0.00189684	0.045234	X	98046854	98118334	+	5499	Stard8	GO:0005096;GO:0005096;GO:0005925;GO:0007165;GO:0008289;GO:0030036;GO:0030054;GO:0035023;GO:0043547;	K20632	-	T	0V7TE;18SUB;KOG2200;0DI5G;12NR9;1CSVV;1B47W;0UP9N;09WVF	START domain containing 8 [Source:MGI Symbol;Acc:MGI:2448556]	236920	Q8K031
ENSMUSG00000034484	2762.39	1805.63	3719.16	2.05975	1.04247	0.00190761	0.0453938	18	53309388	53353937	+	2702	Snx2	GO:0005154;GO:0005154;GO:0005158;GO:0005158;GO:0005737;GO:0005737;GO:0005764;GO:0005764;GO:0005768;GO:0005768;GO:0005768;GO:0005768;GO:0005829;GO:0006886;GO:0006897;GO:0008289;GO:0010008;GO:0010008;GO:0010008;GO:0010008;GO:0015031;GO:0016020;GO:0016020;GO:0016020;GO:0030027;GO:0030904;GO:0030904;GO:0030904;GO:0030905;GO:0030905;GO:0031901;GO:0032991;GO:0032991;GO:0034498;GO:0035091;GO:0035091;GO:…	K17917	-	U	12P21;18WDV;09YA2;1CSC3;0DH0G;KOG2273;0UJUW;0VC3N;1AVCJ	sorting nexin 2 [Source:MGI Symbol;Acc:MGI:1915054]	67804	Q9CWK8
ENSMUSG00000057143	1700.12	1422.89	1977.34	1.38966	0.474736	0.0019098	0.0453938	7	103987961	104002569	-	3740	Trim12c	GO:0000209;GO:0000932;GO:0004842;GO:0005634;GO:0005654;GO:0005737;GO:0005737;GO:0005737;GO:0005829;GO:0008270;GO:0010468;GO:0010508;GO:0016567;GO:0019901;GO:0019901;GO:0030674;GO:0032880;GO:0038187;GO:0042802;GO:0042803;GO:0042803;GO:0043123;GO:0045087;GO:0046596;GO:0046872;GO:0051092;GO:0061630;GO:1990462;GO:0000209;GO:0000932;GO:0004842;GO:0005634;GO:0005654;GO:0005737;GO:0005737;GO:0005737;GO:…	K10648	EC:2.3.2.27	O	0ITFH	tripartite motif-containing 12C [Source:MGI Symbol;Acc:MGI:4821183]	319236	D3Z3L3
ENSMUSG00000090215	417.155	331.323	502.988	1.51812	0.602286	0.00193078	0.0457565	7	103978678	103986116	+	1850	Trim34b	GO:0000209;GO:0005654;GO:0005737;GO:0005829;GO:0008270;GO:0010468;GO:0010508;GO:0016567;GO:0019901;GO:0032880;GO:0042803;GO:0043123;GO:0045087;GO:0046596;GO:0046872;GO:0051092;GO:0061630;GO:0000209;GO:0005654;GO:0005737;GO:0005829;GO:0008270;GO:0010468;GO:0010508;GO:0016567;GO:0019901;GO:0032880;GO:0042803;GO:0043123;GO:0045087;GO:0046596;GO:0046872;GO:0051092;GO:0061630;	K11999	-	O	KOG2177;1AUBY;18SY8;0DQWN;13NFE;1D0YZ;0A2I9;0UJIK;0VFG6	tripartite motif-containing 34B [Source:MGI Symbol;Acc:MGI:4821264]	434218	K7N6K2
ENSMUSG00000029810	1818.24	1149.94	2486.55	2.16234	1.11259	0.0019342	0.0457565	6	48810752	48818430	-	2371	Tmem176b	GO:0005515;GO:0005634;GO:0016020;GO:0016021;GO:0016021;GO:0030154;GO:0031965;GO:2001199;GO:2001199;GO:0005515;GO:0005634;GO:0016020;GO:0016021;GO:0016021;GO:0030154;GO:0031965;GO:2001199;GO:2001199;GO:0005515;GO:0005634;GO:0016020;GO:0016021;GO:0016021;GO:0030154;GO:0031965;GO:2001199;GO:2001199;GO:0005515;GO:0005634;GO:0016020;GO:0016021;GO:0016021;GO:0030154;GO:0031965;GO:2001199;GO:2001199;GO:…	-	-	S	1D11H;09XJD;0UIB9;19335;1ATVK;0VF3R;0IXII;0DRTB;13RGN	transmembrane protein 176B [Source:MGI Symbol;Acc:MGI:1916348]	65963	Q9R1Q6
ENSMUSG00000029405	1987.99	1627.52	2348.46	1.44297	0.529039	0.00193453	0.0457565	5	92200005	92231578	-	8659	G3bp2	GO:0002376;GO:0003676;GO:0003723;GO:0003723;GO:0003729;GO:0005737;GO:0005829;GO:0005829;GO:0007264;GO:0010494;GO:0010494;GO:0034063;GO:0045087;GO:0051028;GO:0051260;GO:0062029;GO:1990904;GO:0002376;GO:0003676;GO:0003723;GO:0003723;GO:0003729;GO:0005737;GO:0005829;GO:0005829;GO:0007264;GO:0010494;GO:0010494;GO:0034063;GO:0045087;GO:0051028;GO:0051260;GO:0062029;GO:1990904;GO:0002376;GO:0003676;GO:…	-	-	T	1CT97;09X76;135VG;0DIIM;KOG0116;1B2B5;0V85S;191H7;0UM33	GTPase activating protein (SH3 domain) binding protein 2 [Source:MGI Symbol;Acc:MGI:2442040]	23881	P97379;Q3U541;Q3TEL4;Q3U6B1
ENSMUSG00000039735	11325.5	9634.84	13016.1	1.35094	0.433965	0.00195014	0.0460507	3	122332368	122413364	-	12376	Fnbp1l	GO:0005886;GO:0005938;GO:0006897;GO:0007165;GO:0016020;GO:0005737;GO:0005856;GO:0005886;GO:0006897;GO:0006897;GO:0006914;GO:0007165;GO:0016020;GO:0005737;GO:0005856;GO:0005886;GO:0006897;GO:0006897;GO:0006914;GO:0007165;GO:0016020;GO:0005737;GO:0005856;GO:0005886;GO:0006897;GO:0006897;GO:0006914;GO:0007165;GO:0016020;	K20121	-	Z	0WG1G;13BRZ;0INNW;0E7SQ;1DESI;1972S;0B3MK;1BASG;0V2UB	formin binding protein 1-like [Source:MGI Symbol;Acc:MGI:1925642]	214459	E9PUI5
ENSMUSG00000025498	6669.54	3438.53	9900.54	2.8793	1.52572	0.00196793	0.0463951	7	140842619	140846394	-	3776	Irf7	GO:0000976;GO:0003700;GO:0005634;GO:0006355;GO:0000976;GO:0000978;GO:0000978;GO:0000978;GO:0000981;GO:0000981;GO:0000981;GO:0000981;GO:0000987;GO:0002376;GO:0002376;GO:0002819;GO:0002819;GO:0002819;GO:0003677;GO:0003677;GO:0003677;GO:0003700;GO:0005515;GO:0005515;GO:0005634;GO:0005634;GO:0005634;GO:0005634;GO:0005654;GO:0005654;GO:0005737;GO:0005737;GO:0005737;GO:0005829;GO:0005829;GO:0006355;GO:…	K09447	-	K	0V6WU;0IWNR;0UJ8Y;0DH74;18Z6T;1CRX8;13QBS;09VYE;1AZYD	interferon regulatory factor 7 [Source:MGI Symbol;Acc:MGI:1859212]	54123	P70434;Q542T3
ENSMUSG00000001156	513.974	223.439	804.51	3.60057	1.84823	0.00197195	0.0464144	6	86624024	86646143	-	7072	Mxd1	GO:0000122;GO:0000122;GO:0000785;GO:0000978;GO:0001227;GO:0005654;GO:0005739;GO:0005829;GO:0046983;GO:0000122;GO:0046983;GO:0000122;	K09114	-	K	1BAW9;0IPD6;1974V;1DF08;13CCP;0WGF6;0V2ZK;0E80W;0B400	MAX dimerization protein 1 [Source:MGI Symbol;Acc:MGI:96908]	17119	Q8K1Z8
ENSMUSG00000039308	625.712	508.654	742.77	1.46027	0.546232	0.00197786	0.0464781	14	20773798	20784630	-	4546	Ndst2	GO:0000139;GO:0002002;GO:0003824;GO:0005794;GO:0005794;GO:0005794;GO:0006024;GO:0008146;GO:0008146;GO:0008152;GO:0009987;GO:0015012;GO:0015012;GO:0015014;GO:0015016;GO:0015016;GO:0015016;GO:0015016;GO:0016020;GO:0016021;GO:0016740;GO:0016787;GO:0016787;GO:0019213;GO:0019213;GO:0030210;GO:0000139;GO:0002002;GO:0003824;GO:0005794;GO:0005794;GO:0005794;GO:0006024;GO:0008146;GO:0008146;GO:0008152;GO:…	K02577	-	O	1AV0V;0DHDT;KOG3703;0V732;09W4Q;18XRY;12PB9;0UJIA;1CS3Z	N-deacetylase/N-sulfotransferase (heparan glucosaminyl) 2 [Source:MGI Symbol;Acc:MGI:97040]	17423	P52850
ENSMUSG00000079227	3064.41	1697.79	4431.04	2.60989	1.38399	0.00198379	0.0465421	9	123921580	123947736	+	8434	Ccr5	GO:0003779;GO:0004930;GO:0004930;GO:0004950;GO:0005737;GO:0005737;GO:0005768;GO:0005886;GO:0006816;GO:0006935;GO:0006952;GO:0006954;GO:0006954;GO:0006955;GO:0006955;GO:0007165;GO:0007186;GO:0007186;GO:0007186;GO:0007204;GO:0007204;GO:0007267;GO:0009897;GO:0009897;GO:0009986;GO:0010628;GO:0014808;GO:0016020;GO:0016021;GO:0016021;GO:0016493;GO:0016493;GO:0016493;GO:0019722;GO:0019722;GO:0019901;GO:…	K04180	-	T;P	KOG3656;1CRZB;0V6YN;1AYME;19483;09T6C;13K12;0DH9A;0UMN2	chemokine (C-C motif) receptor 5 [Source:MGI Symbol;Acc:MGI:107182]	12774	P51682
ENSMUSG00000033450	376.27	263.887	488.652	1.85174	0.888884	0.00199389	0.0466306	17	8144832	8153729	+	3080	Tagap	GO:0005085;GO:0005096;GO:0007165;GO:0043547;GO:0050790;GO:0051607;	K20654	-	T	1CZ07;0DPZX;0A2C4;1ARVM;0UI8W;13JDU;1915N;0VB6P;KOG4724	T cell activation Rho GTPase activating protein [Source:MGI Symbol;Acc:MGI:3615484]	72536	B2RWW0
ENSMUSG00000056692	4462.42	3782.27	5142.56	1.35965	0.443237	0.001994	0.0466306	17	27970209	28039622	-	5287	Ilrun	GO:0000407;GO:0002376;GO:0005634;GO:0005634;GO:0005737;GO:0005737;GO:0016236;GO:0032480;GO:0032480;GO:0032720;GO:0032720;GO:0043130;GO:0043392;GO:0043392;GO:0045087;GO:0050687;GO:0050687;GO:1900181;GO:1900181;GO:0005634;GO:0005737;GO:0005813;GO:0005829;GO:0016607;GO:0032480;GO:0032720;GO:0043392;GO:0050687;GO:1900181;	-	-	S;P;L	1CVN4;12S33;192SR;0DKT9;1B4Z8;0UTHT;KOG4351;0VAGP;09ZJW	inflammation and lipid regulator with UBA-like and NBR1-like domains [Source:MGI Symbol;Acc:MGI:106281]	224647	Q3TT38
ENSMUSG00000054072	3259.37	770.449	5748.28	7.46095	2.89936	0.00201678	0.0470875	18	60509099	60525706	+	5823	Iigp1	GO:0000166;GO:0002376;GO:0003924;GO:0003924;GO:0003924;GO:0005515;GO:0005525;GO:0005525;GO:0005525;GO:0005634;GO:0005737;GO:0005783;GO:0005789;GO:0005789;GO:0005794;GO:0006952;GO:0009617;GO:0010506;GO:0016020;GO:0016020;GO:0016787;GO:0019003;GO:0019003;GO:0019221;GO:0020005;GO:0031965;GO:0032580;GO:0035458;GO:0035458;GO:0042802;GO:0042802;GO:0042832;GO:0045087;GO:0050829;GO:0000166;GO:0002376;GO:…	-	-	S	0J4GH;13YGS	interferon inducible GTPase 1 [Source:MGI Symbol;Acc:MGI:1926259]	60440	Q9QZ85;J7NNX8
ENSMUSG00000027395	200.278	250.742	149.814	0.597485	-0.743024	0.00205157	0.0477619	2	128942915	128968514	+	5805	Polr1b	GO:0003677;GO:0003899;GO:0003899;GO:0003899;GO:0003899;GO:0005515;GO:0005634;GO:0005634;GO:0005634;GO:0005654;GO:0005694;GO:0005730;GO:0005730;GO:0005730;GO:0005736;GO:0005736;GO:0005829;GO:0005829;GO:0006351;GO:0007566;GO:0009303;GO:0016740;GO:0016779;GO:0017126;GO:0032549;GO:0046872;GO:0003677;GO:0003899;GO:0003899;GO:0005634;GO:0006351;GO:0016740;GO:0016779;GO:0032549;	K03002	EC:2.7.7.6	K	1ATH0;0UHXC;0V5YF;0DG82;18Z8G;KOG0216;09UYJ;12NJH;1CPXB	polymerase (RNA) I polypeptide B [Source:MGI Symbol;Acc:MGI:108014]	20017	P70700
ENSMUSG00000057191	740.743	446.255	1035.23	2.31982	1.21401	0.00205226	0.0477619	9	21437472	21456629	+	1447	AB124611	GO:0016020;GO:0016021;	-	-	S	1AXIS;12TU2;0IJQU;1CX8H;0UN2A;0DNBF;0A0Q6;0VBKD;191JI	cDNA sequence AB124611 [Source:MGI Symbol;Acc:MGI:3043001]	382062	Q75VT8;Z4YNA9
ENSMUSG00000031732	354.552	278.928	430.176	1.54225	0.625034	0.00206066	0.0478024	8	110595174	110671303	+	8449	Phlpp2	GO:0001917;GO:0004722;GO:0005654;GO:0005737;GO:0005829;GO:0006470;GO:0016791;GO:0021766;GO:0042622;GO:0045171;GO:0072686;GO:0001917;GO:0004721;GO:0004722;GO:0004722;GO:0004722;GO:0005634;GO:0005737;GO:0005737;GO:0005737;GO:0006470;GO:0007165;GO:0016020;GO:0016787;GO:0016791;GO:0042622;GO:0043231;GO:0046872;GO:0106306;GO:0106307;	K16340	EC:3.1.3.16	T	12PJQ;0UM7U;KOG0619;KOG0618;0VA38;0DINI;09Z5X;192G7;1AUGS;1CTDD	PH domain and leucine rich repeat protein phosphatase 2 [Source:MGI Symbol;Acc:MGI:2444928]	244650	Q8BXA7;J3QM82
ENSMUSG00000030232	3509.81	2969.78	4049.83	1.36368	0.447504	0.00206119	0.0478024	6	140568389	140624198	+	9851	Aebp2	GO:0000122;GO:0000978;GO:0001227;GO:0001227;GO:0003677;GO:0003677;GO:0005634;GO:0005634;GO:0005654;GO:0006325;GO:0006355;GO:0006357;GO:0035098;GO:0035098;GO:0035098;GO:0046872;GO:0000122;GO:0000978;GO:0001227;GO:0001227;GO:0003677;GO:0003677;GO:0005634;GO:0005634;GO:0005654;GO:0006325;GO:0006355;GO:0006357;GO:0035098;GO:0035098;GO:0035098;GO:0046872;GO:0000122;GO:0000978;GO:0001227;GO:0001227;GO:…	K17452	-	K	09XNA;18Y2B;1CTRG;13HMW;0V8JZ;1AX50;KOG1721;0DJ01;0UMNM	AE binding protein 2 [Source:MGI Symbol;Acc:MGI:1338038]	11569	Q9Z248
ENSMUSG00000042790	340.232	266.961	413.503	1.54892	0.631266	0.00206635	0.0478024	9	45774723	45818209	-	5939	Rnf214	GO:0004842;GO:0005575;GO:0016567;GO:0046872;GO:0004842;GO:0005575;GO:0016567;GO:0046872;GO:0004842;GO:0005575;GO:0016567;GO:0046872;GO:0004842;GO:0005575;GO:0016567;GO:0046872;GO:0004842;GO:0005575;GO:0016567;GO:0046872;	-	-	O	1CXMX;0DQAD;0VDIN;18TQC;13M3F;0A2NV;1AY3H;0UN2S;0IF5G	ring finger protein 214 [Source:MGI Symbol;Acc:MGI:2444451]	235315	Q8BFU3
ENSMUSG00000062960	842.468	348.046	1336.89	3.84113	1.94153	0.00206718	0.0478024	5	76093487	76139118	-	9030	Kdr	GO:0001525;GO:0001569;GO:0001934;GO:0001938;GO:0004672;GO:0004713;GO:0004713;GO:0004713;GO:0004714;GO:0004714;GO:0005021;GO:0005021;GO:0005178;GO:0005524;GO:0005768;GO:0005768;GO:0005769;GO:0005783;GO:0005783;GO:0005794;GO:0005886;GO:0005886;GO:0005887;GO:0006468;GO:0007169;GO:0008284;GO:0008360;GO:0010595;GO:0010629;GO:0014068;GO:0016020;GO:0016021;GO:0016021;GO:0016239;GO:0016301;GO:0016310;GO:…	K05098	EC:2.7.10.1	T	0V51R;1CQ26;09U2S;KOG0200;1AYVK;0UQ3R;18TC6;0DFCG;12TBY	kinase insert domain protein receptor [Source:MGI Symbol;Acc:MGI:96683]	16542	-
ENSMUSG00000057110	833.939	686.177	981.701	1.43068	0.516703	0.00207299	0.0478602	2	34999504	35068834	+	10194	Cntrl	GO:0001822;GO:0003279;GO:0003281;GO:0003674;GO:0005737;GO:0005813;GO:0005815;GO:0005815;GO:0005815;GO:0005829;GO:0005856;GO:0007049;GO:0008092;GO:0035904;GO:0048132;GO:0048471;GO:0051301;GO:0051493;GO:0060976;GO:0072687;GO:0090543;GO:0090619;GO:0097431;GO:0120103;GO:0001822;GO:0003279;GO:0003281;GO:0003674;GO:0005737;GO:0005813;GO:0005815;GO:0005815;GO:0005815;GO:0005829;GO:0005856;GO:0007049;GO:…	K16770	-	Z;S	0VDJF;1B00Z;18TPB;0IJGD;0DQBA;12P9S;1CZD6;0A2PK;0UINR	centriolin [Source:MGI Symbol;Acc:MGI:1889576]	26920	-
ENSMUSG00000038467	5686.66	4832.17	6541.15	1.35367	0.436872	0.00209445	0.0482419	2	154493625	154536705	+	2027	Chmp4b	GO:0000281;GO:0000281;GO:0000281;GO:0000815;GO:0000815;GO:0000815;GO:0000815;GO:0005515;GO:0005515;GO:0005634;GO:0005634;GO:0005634;GO:0005634;GO:0005635;GO:0005635;GO:0005635;GO:0005737;GO:0005737;GO:0005737;GO:0005768;GO:0005768;GO:0005768;GO:0005771;GO:0005829;GO:0005829;GO:0006620;GO:0006620;GO:0006900;GO:0006914;GO:0006914;GO:0006997;GO:0006997;GO:0007034;GO:0007080;GO:0007080;GO:0009898;GO:…	K12194	-	U	KOG1656;0A258;0VD0Q;1B26I;1CYSI;0DPTF;0UKR1;1918S;12UDW	charged multivesicular body protein 4B [Source:MGI Symbol;Acc:MGI:1922858]	75608	Q9D8B3
ENSMUSG00000002028	1967.49	1599.65	2335.33	1.4599	0.545872	0.00209832	0.0482419	9	44714652	44792594	-	16670	Kmt2a	GO:0003677;GO:0003677;GO:0003677;GO:0003682;GO:0005515;GO:0005515;GO:0005634;GO:0005634;GO:0005634;GO:0005654;GO:0005829;GO:0006306;GO:0006325;GO:0006355;GO:0008168;GO:0008270;GO:0008270;GO:0008270;GO:0008285;GO:0008542;GO:0009416;GO:0009791;GO:0009952;GO:0010468;GO:0016740;GO:0018026;GO:0032259;GO:0032411;GO:0032922;GO:0035097;GO:0035097;GO:0035097;GO:0035097;GO:0035162;GO:0035640;GO:0035864;GO:…	K09186	EC:2.1.1.354	K;B	18TA0;12NA5;0V4KN;1ASE8;1CVSP;0DKXH;0US8P;09ZF7;KOG1084	lysine (K)-specific methyltransferase 2A [Source:MGI Symbol;Acc:MGI:96995]	214162	-
ENSMUSG00000028057	1019.5	1205.44	833.564	0.691501	-0.532196	0.0020995	0.0482419	3	88624145	88638356	+	3229	Rit1	GO:0000166;GO:0003924;GO:0003924;GO:0003924;GO:0003924;GO:0005515;GO:0005516;GO:0005525;GO:0005525;GO:0005525;GO:0005525;GO:0005525;GO:0005886;GO:0005886;GO:0005886;GO:0007165;GO:0007265;GO:0007265;GO:0007265;GO:0016020;GO:0016020;GO:0016787;GO:0019003;GO:0000166;GO:0003924;GO:0005525;GO:0005525;GO:0007165;GO:0016020;GO:0000166;GO:0003924;GO:0005525;GO:0005525;GO:0007165;GO:0016020;GO:0000166;GO:…	K07832	-	S;J	0DG5H;1CSII;09YJZ;1AVK3;18WM7;KOG0395;0V9HR;0UK3T;12YJ6	Ras-like without CAAX 1 [Source:MGI Symbol;Acc:MGI:108053]	19769	P70426
ENSMUSG00000078249	1167.67	971.857	1363.49	1.40297	0.488484	0.00211868	0.0486056	11	120653620	120655245	+	1626	Hmga1b	GO:0000785;GO:0000987;GO:0003677;GO:0003677;GO:0003677;GO:0003680;GO:0003680;GO:0003682;GO:0003712;GO:0003713;GO:0003906;GO:0005634;GO:0005634;GO:0005634;GO:0005634;GO:0005694;GO:0006355;GO:0006355;GO:0007283;GO:0008134;GO:0008134;GO:0008285;GO:0019899;GO:0030374;GO:0030374;GO:0030527;GO:0035985;GO:0035985;GO:0035986;GO:0042974;GO:0042974;GO:0042975;GO:0042975;GO:0045892;GO:0045893;GO:0045944;GO:…	K09282	-	K;B	13YDG;0UW13;0DV8I;1D4EN;193RZ;0A8TM;0VJQ1;0J4ZT;1B6E9	high mobility group AT-hook 1B [Source:MGI Symbol;Acc:MGI:96161]	111241	P17095;Q566K0
ENSMUSG00000028709	1258.81	1049.12	1468.49	1.39973	0.485148	0.0021299	0.0487263	4	115685289	115693382	+	2975	Mob3c	GO:0003674;GO:0005575;GO:0008150;GO:0016301;GO:0016310;GO:0046872;	-	-	D	12Q3F;18WQG;1CR3B;0DGDT;0UI56;KOG1903;0V64B;1AUFP;09V4P	MOB kinase activator 3C [Source:MGI Symbol;Acc:MGI:2140623]	100465	Q8BJG4;B1ASD4
ENSMUSG00000036943	6184.71	4879.48	7489.95	1.53499	0.618227	0.00213066	0.0487263	9	66750946	66826969	-	4733	Rab8b	GO:0000166;GO:0003924;GO:0005102;GO:0005102;GO:0005515;GO:0005525;GO:0005525;GO:0005654;GO:0005654;GO:0005739;GO:0005768;GO:0005778;GO:0005778;GO:0005886;GO:0005886;GO:0005886;GO:0005886;GO:0006904;GO:0008021;GO:0009306;GO:0015031;GO:0016020;GO:0016604;GO:0016604;GO:0017157;GO:0019003;GO:0019003;GO:0019003;GO:0019882;GO:0019882;GO:0030140;GO:0030670;GO:0030911;GO:0030911;GO:0031346;GO:0031346;GO:…	K07902	-	U	0DJYH;09YQS;0V9NP;1CUS4;12RDJ;0UN5K;KOG0078;1B21E;191UJ	RAB8B, member RAS oncogene family [Source:MGI Symbol;Acc:MGI:2442982]	235442	P61028;Q0PD49
ENSMUSG00000024013	342.772	269.445	416.099	1.54428	0.626937	0.00214756	0.0490293	17	29579888	29598635	+	4507	Fgd2	GO:0001726;GO:0005085;GO:0005085;GO:0005085;GO:0005085;GO:0005634;GO:0005634;GO:0005737;GO:0005737;GO:0005737;GO:0005768;GO:0005769;GO:0005769;GO:0005856;GO:0005886;GO:0007010;GO:0016020;GO:0031901;GO:0032587;GO:0042995;GO:0043507;GO:0046847;GO:0046872;GO:0046872;GO:1901981;GO:0005085;GO:0050790;GO:0046872;GO:0046872;	K05721	-	T	0VCWT;12UA0;0A0K6;KOG4424;0DPPV;0UT0I;18Z83;1CYNN;1AZ6T	FYVE, RhoGEF and PH domain containing 2 [Source:MGI Symbol;Acc:MGI:1347084]	26382	Q8BY35
ENSMUSG00000063663	351.797	258	445.595	1.72711	0.788364	0.00215068	0.0490293	X	107780622	107877978	-	12692	Brwd3	GO:0003674;GO:0005634;GO:0006357;GO:0007010;GO:0007010;GO:0007010;GO:0007010;GO:0008360;GO:0008360;GO:0008360;GO:0008360;GO:0003674;GO:0005634;GO:0006357;GO:0007010;GO:0007010;GO:0007010;GO:0008360;GO:0008360;GO:0008360;	K11798	-	S;K;B	0WHYR;0IRXR;0B5BV;13EI3;197BC;0V3FM;0E8U7;1DFR2;1BB80	bromodomain and WD repeat domain containing 3 [Source:MGI Symbol;Acc:MGI:3029414]	382236	A2AHJ4
ENSMUSG00000070056	212.827	265.138	160.515	0.6054	-0.72404	0.00216397	0.049255	8	36054952	36146603	+	6666	Mfhas1	GO:0000166;GO:0002376;GO:0005525;GO:0005525;GO:0005525;GO:0005737;GO:0005737;GO:0005737;GO:0006952;GO:0006954;GO:0006954;GO:0006954;GO:0009968;GO:0030218;GO:0030218;GO:0030218;GO:0031625;GO:0031625;GO:0034121;GO:0034136;GO:0034136;GO:0034136;GO:0034137;GO:0034137;GO:0034137;GO:0034144;GO:0034144;GO:0034144;GO:0035308;GO:0035308;GO:0035308;GO:0043030;GO:0043030;GO:0043030;GO:0045087;GO:0045087;GO:…	-	-	T	KOG0619;1B10I;0V8EN;1CTJG;12RDN;18W4X;0DIU5;09XGK;0URVQ	malignant fibrous histiocytoma amplified sequence 1 [Source:MGI Symbol;Acc:MGI:1098644]	52065	Q3V1N1
ENSMUSG00000009621	354.449	433.455	275.443	0.635459	-0.654129	0.00216776	0.0492638	2	27152116	27317045	-	6915	Vav2	GO:0005085;GO:0005085;GO:0035556;GO:0046872;GO:0050790;GO:0001525;GO:0001784;GO:0001784;GO:0005085;GO:0005085;GO:0005085;GO:0005154;GO:0005515;GO:0005515;GO:0005737;GO:0005829;GO:0005886;GO:0007264;GO:0008361;GO:0016477;GO:0030031;GO:0030032;GO:0035556;GO:0043087;GO:0043087;GO:0043552;GO:0046872;	K05730	-	T	KOG2996;0DI9B;0UUEY;12QKG;1B1Z1;09WMR;0V7KF;1CSZT;18ZXC	vav 2 oncogene [Source:MGI Symbol;Acc:MGI:102718]	22325	Q60992;Q7TSI6
ENSMUSG00000033319	936.91	774.661	1099.16	1.41889	0.504764	0.00217305	0.0493069	18	46634813	46659038	-	5726	Fem1c	GO:0000151;GO:0003674;GO:0005654;GO:0005654;GO:0005737;GO:0005829;GO:0005829;GO:0006511;GO:0016567;	-	-	S;O	18Z7Z;KOG0508;0UM8E;0DINY;12SQ9;09U1V;0V50T;1AXUX;1CTDU	fem 1 homolog c [Source:MGI Symbol;Acc:MGI:2444737]	240263	Q8CEF1;B2RRW5
ENSMUSG00000024085	4043.89	3430.9	4656.89	1.35734	0.440778	0.00219083	0.0496326	17	64907731	65062105	+	7223	Man2a1	GO:0000139;GO:0000139;GO:0000139;GO:0000139;GO:0001701;GO:0001889;GO:0003824;GO:0004559;GO:0004559;GO:0004572;GO:0004572;GO:0004572;GO:0005615;GO:0005794;GO:0005794;GO:0005797;GO:0005797;GO:0005801;GO:0005975;GO:0006013;GO:0006486;GO:0006491;GO:0006491;GO:0006491;GO:0006517;GO:0007005;GO:0007033;GO:0007585;GO:0008152;GO:0015923;GO:0016020;GO:0016021;GO:0016787;GO:0016787;GO:0016798;GO:0016799;GO:…	K01231	EC:3.2.1.114	G	0DM6C;18TQX;0V9UI;0UQAF;09VYT;KOG1959;12QNA;1AZHX;1CW1I	mannosidase 2, alpha 1 [Source:MGI Symbol;Acc:MGI:104669]	17158	P27046;Q8C4L1
ENSMUSG00000040723	2665.6	2221.37	3109.84	1.39997	0.485391	0.0021956	0.0496631	1	165474085	165537326	-	10131	Rcsd1	GO:0003009;GO:0005575;GO:0051015;GO:0071474;GO:0003009;GO:0005575;GO:0051015;GO:0051015;GO:0071474;GO:0071474;	K18615	-	S;T	1CXEF;0IKAV;191HI;0DHBZ;0V7G3;0URUS;13P19;1AVX2;09TAM	RCSD domain containing 1 [Source:MGI Symbol;Acc:MGI:2676394]	226594	Q3UZA1
ENSMUSG00000025949	1123.89	933.045	1314.74	1.40908	0.494755	0.00220268	0.0497455	1	65225842	65317854	+	19211	Pikfyve	GO:0000285;GO:0046854;GO:0000166;GO:0000285;GO:0000285;GO:0005524;GO:0005524;GO:0016020;GO:0016301;GO:0016307;GO:0016307;GO:0016310;GO:0016740;GO:0035556;GO:0046488;GO:0046488;GO:0046854;GO:0046872;GO:0046872;GO:0000285;GO:0046854;GO:0000139;GO:0000166;GO:0000285;GO:0000285;GO:0000285;GO:0000285;GO:0000285;GO:0004674;GO:0005515;GO:0005515;GO:0005524;GO:0005524;GO:0005768;GO:0005829;GO:0005911;GO:…	K00921	EC:2.7.1.150	T	0VBD4;1CQMP;0DFY6;0IMP3;18X21;0UHG9;0A1YD;1AT33;KOG0230;139MH	phosphoinositide kinase, FYVE type zinc finger containing [Source:MGI Symbol;Acc:MGI:1335106]	18711	Q9Z1T6
ENSMUSG00000022901	903.009	415.758	1390.26	3.34391	1.74154	0.00220862	0.049802	16	36424231	36486443	-	3661	Cd86	GO:0002224;GO:0002250;GO:0002376;GO:0002377;GO:0002668;GO:0005102;GO:0005515;GO:0005886;GO:0006955;GO:0007166;GO:0007202;GO:0009897;GO:0009897;GO:0009986;GO:0016020;GO:0016021;GO:0023035;GO:0031295;GO:0034138;GO:0042102;GO:0042102;GO:0042104;GO:0042113;GO:0042113;GO:0042130;GO:0043231;GO:0051607;GO:0070062;GO:0071222;GO:0071222;GO:1901224;GO:1990051;	K05413	-	T	1CT9X;09ZXT;192M6;0IYP1;1AYZF;0V75E;0DMGS;13SM0;0UM3C	CD86 antigen [Source:MGI Symbol;Acc:MGI:101773]	12524	P42082;Q549Q9
ENSMUSG00000015335	287.924	352.285	223.563	0.634609	-0.656059	0.00222778	0.0501455	2	29980956	29983660	-	1785	Zdhhc12	GO:0000139;GO:0005783;GO:0005783;GO:0005783;GO:0005789;GO:0005794;GO:0005794;GO:0005794;GO:0006612;GO:0016020;GO:0016021;GO:0016409;GO:0016409;GO:0016740;GO:0016746;GO:0018215;GO:0018230;GO:0018230;GO:0018345;GO:0019706;GO:0019706;GO:0032230;GO:0097116;GO:0000139;GO:0005783;GO:0005783;GO:0005783;GO:0005789;GO:0005794;GO:0005794;GO:0005794;GO:0006612;GO:0016020;GO:0016021;GO:0016409;GO:0016409;GO:…	K18932	EC:2.3.1.225	S;M	0V6AN;18UQ8;1AXWE;0UNYJ;13N6G;09VBC;0DGJU;KOG1311;1CR9P	zinc finger, DHHC domain containing 12 [Source:MGI Symbol;Acc:MGI:1913470]	66220	Q8VC90
ENSMUSG00000028028	1442.52	1043.66	1841.39	1.76436	0.819148	0.00223076	0.0501455	3	127463959	127574176	-	6868	Alpk1	GO:0004674;GO:0005524;GO:0006468;GO:0016301;GO:0016310;GO:0016740;GO:0002753;GO:0004674;GO:0004674;GO:0005524;GO:0005829;GO:0006468;GO:0016301;GO:0016310;GO:0016740;GO:0043123;GO:0045087;GO:0048029;GO:0004674;GO:0006468;	K08868	-	O	1CRED;0IFN0;0V6EW;12R1J;1AU39;0DGQH;18UGG;09VFQ;0UIJK	alpha-kinase 1 [Source:MGI Symbol;Acc:MGI:1918731]	71481	E9QNX4
ENSMUSG00000034135	1259.09	937.285	1580.9	1.68668	0.754184	0.00223925	0.0502583	9	45924118	46135492	+	9318	Sik3	GO:0000166;GO:0004672;GO:0004674;GO:0004674;GO:0005524;GO:0005524;GO:0005654;GO:0006468;GO:0016740;GO:0106310;GO:0106311;GO:0000166;GO:0004672;GO:0004674;GO:0004674;GO:0005524;GO:0005524;GO:0006468;GO:0016740;GO:0106310;GO:0106311;GO:0000166;GO:0004672;GO:0004674;GO:0005524;GO:0005524;GO:0006468;GO:0004672;GO:0005524;GO:0006468;	K19009	EC:2.7.11.1	T	KOG0586;09XP3;1CPT9;0UG8S;192H6;0DF3G;1AS1N;0V4ER;12NJJ	SIK family kinase 3 [Source:MGI Symbol;Acc:MGI:2446296]	70661	Q6P4S6;E9PU87
ENSMUSG00000024539	837.463	675.116	999.811	1.48095	0.56652	0.00226078	0.0506632	18	67798581	67857665	-	3125	Ptpn2	GO:0004721;GO:0004725;GO:0004725;GO:0005783;GO:0006470;GO:0016311;GO:0016787;GO:0016791;GO:0035335;GO:0000122;GO:0004721;GO:0004725;GO:0004725;GO:0004725;GO:0004725;GO:0004726;GO:0005178;GO:0005515;GO:0005515;GO:0005634;GO:0005634;GO:0005634;GO:0005654;GO:0005654;GO:0005737;GO:0005783;GO:0005783;GO:0005793;GO:0005793;GO:0005829;GO:0005886;GO:0005886;GO:0006470;GO:0006470;GO:0008285;GO:0008285;GO:…	K18026	EC:3.1.3.48	T	KOG0789;0V7EY;0UK0S;1B0V5;09WGE;191RX;0DHRV;1CSG5;12NYK	protein tyrosine phosphatase, non-receptor type 2 [Source:MGI Symbol;Acc:MGI:97806]	19255	Q06180
ENSMUSG00000040479	1148.14	1340.71	955.561	0.712726	-0.48858	0.00226594	0.0507005	2	91763169	91806209	-	6270	Dgkz	GO:0000166;GO:0004143;GO:0005524;GO:0007165;GO:0016301;GO:0016310;GO:0016740;GO:0000166;GO:0003951;GO:0004143;GO:0004143;GO:0005524;GO:0007165;GO:0007205;GO:0016301;GO:0016301;GO:0016310;GO:0016740;GO:0035556;GO:0046486;GO:0000166;GO:0001727;GO:0003951;GO:0004143;GO:0004143;GO:0004143;GO:0004143;GO:0004857;GO:0005515;GO:0005515;GO:0005524;GO:0005634;GO:0005634;GO:0005634;GO:0005737;GO:0005829;GO:…	K00901	EC:2.7.1.107	T;I	0V5GI;KOG0782;09W8Z;0DHIA;0UJQM;18W1X;1AU5A;1CS8I;12PSP	diacylglycerol kinase zeta [Source:MGI Symbol;Acc:MGI:1278339]	104418	Q80UP3
ENSMUSG00000006169	3290	2750.56	3829.44	1.39224	0.477404	0.0022784	0.0508784	11	45742791	45801452	+	7033	Clint1	GO:0005654;GO:0005794;GO:0005794;GO:0016020;GO:0016192;GO:0030276;GO:0043231;GO:0005794;GO:0016020;GO:0016192;	K24721	-	F	0UPXC;KOG2056;12PYK;18ZAN;1CZ73;0A2IA;1B2A1;0VDE6;0DQ5V	clathrin interactor 1 [Source:MGI Symbol;Acc:MGI:2144243]	216705	Q5SUH7;Q3UPG6
ENSMUSG00000026029	1339.92	987.522	1692.31	1.7137	0.777112	0.00228092	0.0508784	1	58834533	58886662	+	2893	Casp8	GO:0001525;GO:0001525;GO:0001841;GO:0004175;GO:0004197;GO:0004197;GO:0004197;GO:0005123;GO:0005164;GO:0005515;GO:0005515;GO:0005515;GO:0005634;GO:0005634;GO:0005654;GO:0005737;GO:0005737;GO:0005737;GO:0005737;GO:0005739;GO:0005829;GO:0005886;GO:0006508;GO:0006508;GO:0006508;GO:0006915;GO:0006915;GO:0006915;GO:0006915;GO:0006919;GO:0006919;GO:0007507;GO:0007507;GO:0008233;GO:0008233;GO:0008234;GO:…	K04398	EC:3.4.22.61	D	1AU0M;0DJ9B;0V8U3;1CU1B;09XWN;18USC;0UM29;KOG3573;12T3F	caspase 8 [Source:MGI Symbol;Acc:MGI:1261423]	12370	O89110;Q3U607
ENSMUSG00000032840	251.935	310.431	193.439	0.62313	-0.682394	0.00230556	0.0513492	5	118383292	118404158	+	5649	Spring1	GO:0000139;GO:0000139;GO:0000139;GO:0003674;GO:0005794;GO:0016020;GO:0016021;GO:2000640;GO:2000640;GO:2000640;GO:2000640;	-	-	S	1CQHQ;0DFU9;13IIP;1ASXW;0V5HV;KOG3136;194SX;0UHA9;09UIP	SREBF pathway regulator in golgi 1 [Source:MGI Symbol;Acc:MGI:1924042]	76792	Q8BTG6
ENSMUSG00000021193	895.087	739.217	1050.96	1.42172	0.507634	0.00232019	0.0515959	13	6598185	6630551	+	4787	Pitrm1	GO:0004222;GO:0004222;GO:0004222;GO:0005739;GO:0005739;GO:0005759;GO:0005759;GO:0005759;GO:0006508;GO:0006508;GO:0006508;GO:0008233;GO:0008237;GO:0008237;GO:0008270;GO:0016485;GO:0016787;GO:0046872;GO:0046872;GO:0004222;GO:0004222;GO:0004222;GO:0004222;GO:0005739;GO:0005739;GO:0005739;GO:0005759;GO:0005759;GO:0005759;GO:0005759;GO:0006508;GO:0006508;GO:0006508;GO:0006508;GO:0008233;GO:0008237;GO:…	K06972	EC:3.4.24.-	O	KOG2019;09Z3S;0VA16;18WY1;12S57;0UIPY;1CVDM;0DKJD;1AZ6D	pitrilysin metallepetidase 1 [Source:MGI Symbol;Acc:MGI:1916867]	69617	Q8K411
ENSMUSG00000043157	230.815	291.847	169.782	0.58175	-0.781528	0.0023256	0.051637	14	61547202	61549385	+	2184	Arl11	GO:0000166;GO:0002244;GO:0005525;GO:0005525;GO:0005525;GO:0005886;GO:0006886;GO:0016192;GO:0000166;GO:0002244;GO:0005525;GO:0005525;GO:0005525;GO:0005886;GO:0006886;GO:0016192;	K07959	-	U	0UPWF;1CW3V;0DM8P;1ATRG;KOG0070;0VAM9;09XKW;195YG;13QQ3	ADP-ribosylation factor-like 11 [Source:MGI Symbol;Acc:MGI:2444054]	219144	Q6P3A9
ENSMUSG00000061458	599.484	488.247	710.721	1.45566	0.541671	0.00233407	0.0517083	12	17398459	17480096	+	3021	Nol10	GO:0000462;GO:0005634;GO:0005634;GO:0005730;GO:0005730;GO:0005730;GO:0005730;GO:0032040;	K14788	-	S;K	1CXX9;0UGVF;1ASJ3;0A2V1;192C1;12RP0;0DNZR;KOG2321;0VE1K	nucleolar protein 10 [Source:MGI Symbol;Acc:MGI:2684913]	217431	Q5RJG1;Q3TUB5
ENSMUSG00000026628	6008.49	4886.2	7130.77	1.45937	0.545345	0.00233595	0.0517083	1	190902493	190950236	-	2154	Atf3	GO:0000122;GO:0000122;GO:0000122;GO:0000976;GO:0000976;GO:0000977;GO:0000977;GO:0000977;GO:0000978;GO:0000978;GO:0000981;GO:0001227;GO:0001227;GO:0001227;GO:0001228;GO:0001228;GO:0001228;GO:0003677;GO:0003677;GO:0003677;GO:0003700;GO:0003700;GO:0003700;GO:0005634;GO:0005634;GO:0005634;GO:0005634;GO:0005634;GO:0005634;GO:0005654;GO:0005654;GO:0005730;GO:0005730;GO:0006094;GO:0006355;GO:0006357;GO:…	K09032	-	K	13JH3;0V8DB;1CTI3;1B4PM;0UMDQ;18WR8;KOG1414;09XF5;0DISV	activating transcription factor 3 [Source:MGI Symbol;Acc:MGI:109384]	11910	Q60765;Q4FJW1
ENSMUSG00000031553	13.6437	3.56023	23.7271	6.66448	2.73649	0.00236298	0.0522269	8	25167241	25215868	-	2942	Adam3	GO:0004222;GO:0005515;GO:0005515;GO:0005886;GO:0006508;GO:0007155;GO:0007338;GO:0007339;GO:0007339;GO:0008237;GO:0009566;GO:0009986;GO:0010628;GO:0016020;GO:0016021;GO:0030317;GO:0032991;GO:0045121;GO:0050684;GO:0061827;GO:0004222;GO:0005515;GO:0005515;GO:0005886;GO:0006508;GO:0007155;GO:0007338;GO:0007339;GO:0007339;GO:0008237;GO:0009566;GO:0009986;GO:0010628;GO:0016020;GO:0016021;GO:0030317;GO:…	-	-	O	0DRHN;13PC9;0VESS;0A3XW;1B4FR;190TC;0UTXP;KOG3607;1D0Q3	a disintegrin and metallopeptidase domain 3 (cyritestin) [Source:MGI Symbol;Acc:MGI:102518]	11497	F8VQ03;Q810R6;Q62287
ENSMUSG00000049488	445.746	251.436	640.056	2.5456	1.34801	0.00236884	0.0522768	4	12039355	12090020	-	7744	Tmem67	GO:0016020;GO:0016021;GO:0036038;GO:0060271;GO:0036038;GO:0060271;GO:0005789;GO:0005813;GO:0010826;GO:0016020;GO:0016021;GO:0030433;GO:0030659;GO:0031005;GO:0035869;GO:0036038;GO:0051082;GO:0060170;GO:0060271;GO:0060271;	K19348	-	A;S	1CWMQ;0V83S;KOG4611;12SJW;191DM;09X57;1B0YV;0DIG8;0URVI	transmembrane protein 67 [Source:MGI Symbol;Acc:MGI:1923928]	329795	Q8BR76;E9QNI1
ENSMUSG00000041135	3821.95	2953.84	4690.06	1.58778	0.667015	0.00237763	0.0523839	4	16122733	16163647	-	2816	Ripk2	GO:0000166;GO:0001961;GO:0002250;GO:0002250;GO:0002376;GO:0002827;GO:0004672;GO:0004672;GO:0004674;GO:0004674;GO:0004706;GO:0004715;GO:0005102;GO:0005102;GO:0005524;GO:0005524;GO:0005737;GO:0005737;GO:0005737;GO:0005737;GO:0005829;GO:0005829;GO:0005829;GO:0005856;GO:0005856;GO:0005856;GO:0006468;GO:0006915;GO:0007249;GO:0007256;GO:0007257;GO:0010800;GO:0010800;GO:0010800;GO:0010942;GO:0010942;GO:…	K08846	EC:2.7.11.1	T	1CQA5;1AU4G;13IJ2;0UIKS;09VGK;KOG0192;18T41;0DFKG;0V6FS	receptor (TNFRSF)-interacting serine-threonine kinase 2 [Source:MGI Symbol;Acc:MGI:1891456]	192656	P58801;Q547H1
ENSMUSG00000035890	436.329	523.243	349.414	0.667786	-0.582543	0.00238092	0.0523839	10	79594349	79602786	-	1704	Rnf126	GO:0005154;GO:0005515;GO:0005634;GO:0005634;GO:0005634;GO:0005654;GO:0005654;GO:0005737;GO:0005737;GO:0005737;GO:0005829;GO:0005829;GO:0006511;GO:0006511;GO:0006511;GO:0006513;GO:0006513;GO:0006513;GO:0016567;GO:0016740;GO:0042059;GO:0042059;GO:0042059;GO:0042127;GO:0042127;GO:0042127;GO:0042147;GO:0042147;GO:0042147;GO:0043161;GO:0043161;GO:0043161;GO:0043162;GO:0043162;GO:0043162;GO:0046872;GO:…	K11982	EC:2.3.2.27	O	12TF5;KOG0800;0UJVQ;1CVF9;18SF6;0DKKU;1ASHP;0VBYQ;09XFW	ring finger protein 126 [Source:MGI Symbol;Acc:MGI:1917544]	70294	Q91YL2;Q3U3G2
ENSMUSG00000040351	1550.74	1283.92	1817.55	1.41562	0.501436	0.00240278	0.0527848	5	3740000	3852925	-	8541	Ankib1	GO:0000151;GO:0000209;GO:0004842;GO:0005737;GO:0006511;GO:0016567;GO:0016740;GO:0031624;GO:0032436;GO:0046872;GO:0061630;GO:0004842;GO:0016567;GO:0016740;GO:0046872;	K11967	EC:2.3.2.31	O	1CUTM;KOG1815;0DJZQ;09YJD;0V9H2;0UNW0;12TDS;191WQ;1AYTB	ankyrin repeat and IBR domain containing 1 [Source:MGI Symbol;Acc:MGI:1918047]	70797	Q6ZPS6
ENSMUSG00000018171	2601.51	2202.7	3000.31	1.36211	0.445838	0.0024345	0.0534007	11	86474691	86574662	-	3862	Vmp1	GO:0000045;GO:0000045;GO:0000045;GO:0000407;GO:0000421;GO:0000421;GO:0000421;GO:0003674;GO:0005730;GO:0005730;GO:0005773;GO:0005774;GO:0005783;GO:0005783;GO:0005783;GO:0005783;GO:0005886;GO:0006914;GO:0006914;GO:0006914;GO:0006914;GO:0007030;GO:0007155;GO:0007566;GO:0012505;GO:0016020;GO:0016020;GO:0016021;GO:0033116;GO:0034329;GO:0034329;GO:0034329;GO:0098609;GO:0098609;GO:0098609;	K21248	-	S;U	KOG1109;0V5GD;1AZ9N;12NRQ;0UH8D;192XY;0DFSX;09UH3;1CQGC	vacuole membrane protein 1 [Source:MGI Symbol;Acc:MGI:1923159]	75909	Q99KU0
ENSMUSG00000036167	1219.4	1017.5	1421.3	1.39685	0.482179	0.00247416	0.0541885	15	93296231	93389391	+	4545	Pphln1	GO:0045892;GO:0045892;GO:0045892;GO:0045892;GO:0045892;GO:0045892;	K21872	-	S	1CT5J;0DIF1;1B047;09X41;18UFH;12S5A;0IFSB;0UGEI;0V82M	periphilin 1 [Source:MGI Symbol;Acc:MGI:1917029]	223828	Q8K2H1;Q3UBL8;Q3TYM7
ENSMUSG00000021366	3411.08	2895.37	3926.79	1.35623	0.439604	0.00249676	0.0544832	13	42205497	42346013	+	9294	Hivep1	GO:0000122;GO:0000122;GO:0000978;GO:0001227;GO:0003676;GO:0005634;GO:0005634;GO:0005654;GO:0005739;GO:0005829;GO:0008270;GO:0016604;GO:0030509;GO:0045944;GO:1990837;	K09239	-	K	0VAS5;0DME5;13IMQ;0UH3W;KOG1721;09ZVR;19049;1ARNR;1CW9C	human immunodeficiency virus type I enhancer binding protein 1 [Source:MGI Symbol;Acc:MGI:96100]	110521	F8VPM9
ENSMUSG00000022126	118651	91011.5	146290	1.60738	0.684714	0.00249844	0.0544832	14	103284413	103294009	+	2623	Acod1	GO:0002760;GO:0006952;GO:0016829;GO:0047613;GO:0071222;GO:0072573;	K17724	EC:4.1.1.6	S;T;K	12NUR;0V5MT;0UQK2;09UN7;18X5T;0DFY0;0IEAF;1AW9Z;1CQMH	aconitate decarboxylase 1 [Source:MGI Symbol;Acc:MGI:103206]	16365	P54987;A0A0R4J027
ENSMUSG00000021501	613.617	500.891	726.343	1.4501	0.536156	0.00249888	0.0544832	13	55770818	55780224	+	1755	Caml	GO:0001881;GO:0005515;GO:0005515;GO:0005515;GO:0005737;GO:0005737;GO:0005783;GO:0007173;GO:0016020;GO:0016021;GO:0031397;GO:0031397;GO:0031625;GO:0032435;GO:0032435;GO:0050821;GO:0050821;GO:0050839;GO:0050839;	K22385	-	S;T	0V6HD;0IEK3;18SQT;0DGEW;0UI79;09VI5;1ATS9;1CR4G;12PBM	calcium modulating ligand [Source:MGI Symbol;Acc:MGI:104728]	12328	P49070
ENSMUSG00000006127	601.484	490.644	712.324	1.45181	0.537855	0.0025238	0.0549438	11	75521814	75539697	+	5728	Inpp5k	GO:0001701;GO:0001726;GO:0001726;GO:0001726;GO:0001726;GO:0001933;GO:0004439;GO:0004439;GO:0004439;GO:0004439;GO:0004445;GO:0005000;GO:0005515;GO:0005634;GO:0005634;GO:0005634;GO:0005737;GO:0005737;GO:0005783;GO:0005783;GO:0005783;GO:0005783;GO:0005802;GO:0005802;GO:0005802;GO:0005829;GO:0005829;GO:0005829;GO:0005886;GO:0005886;GO:0005886;GO:0005886;GO:0005979;GO:0006469;GO:0006469;GO:0006469;GO:…	K24222	EC:3.1.3.56	U	0UGC4;0DHB1;09W1Z;KOG0565;1ATFP;1CS14;0V705;18UH6;12T0D	inositol polyphosphate 5-phosphatase K [Source:MGI Symbol;Acc:MGI:1194899]	19062	Q8C5L6;Q5ND43
ENSMUSG00000059142	233.793	178.808	288.777	1.61502	0.691548	0.00256794	0.0557456	17	23065671	23086108	-	10173	Zfp945	GO:0000978;GO:0001228;GO:0005634;GO:0006355;GO:0006357;GO:0045944;GO:0046872;GO:0000978;GO:0001228;GO:0005634;GO:0006355;GO:0006357;GO:0045944;GO:0046872;	-	-	K	194FV;0V4DW;09TES;1AYV7;0UNG0;KOG1721;12PGP;1CPIM;0DERT	zinc finger protein 945 [Source:MGI Symbol;Acc:MGI:2445132]	240041	Q66L36;Q3TGT7;F6WAU7
ENSMUSG00000019158	151.12	207.55	94.6906	0.456231	-1.13216	0.00256832	0.0557456	7	16186704	16189419	+	883	Tmem160	GO:0003674;GO:0005739;GO:0008150;GO:0016020;GO:0016021;	-	-	S	0UP7J;0DS8J;1D1HQ;13VBC;0VFMD;0A4SF;0J0AT;18ZQ8;1AS5S	transmembrane protein 160 [Source:MGI Symbol;Acc:MGI:1916344]	69094	Q9D938
ENSMUSG00000015947	1684.07	697.703	2670.43	3.82747	1.93639	0.00257432	0.0557918	3	96190225	96201285	-	2589	Fcgr1	GO:0001788;GO:0001798;GO:0001805;GO:0002376;GO:0004888;GO:0005886;GO:0005886;GO:0005887;GO:0006898;GO:0006910;GO:0006911;GO:0007166;GO:0007166;GO:0009617;GO:0009897;GO:0016020;GO:0016021;GO:0019770;GO:0019864;GO:0019864;GO:0019884;GO:0031774;GO:0038094;GO:0042590;GO:0042742;GO:0045087;GO:0045121;GO:0050766;GO:0050776;GO:0050776;GO:0060100;GO:0061098;	K06498	-	T	18WH1;0DN3A;1B39X;0IVK2;0A21R;12QRN;0VCX0;0UT0S;1CYNS	Fc receptor, IgG, high affinity I [Source:MGI Symbol;Acc:MGI:95498]	14129	P26151
ENSMUSG00000045962	3866.26	3287.16	4445.36	1.35234	0.435457	0.00257815	0.0557918	6	119900930	120015633	-	22825	Wnk1	GO:0000166;GO:0000287;GO:0002028;GO:0002028;GO:0003084;GO:0004672;GO:0004672;GO:0004674;GO:0004674;GO:0004674;GO:0004674;GO:0004674;GO:0004860;GO:0005515;GO:0005524;GO:0005524;GO:0005524;GO:0005737;GO:0005737;GO:0005737;GO:0005829;GO:0005829;GO:0006468;GO:0006468;GO:0006468;GO:0006469;GO:0006811;GO:0007165;GO:0010766;GO:0010766;GO:0010820;GO:0010923;GO:0010923;GO:0016020;GO:0016301;GO:0016310;GO:…	K08867	EC:2.7.11.1	T	1B2WJ;KOG0584;0V5V6;1CS9X;0DHJM;132BG;18VTU;0UMA0;09WAB	WNK lysine deficient protein kinase 1 [Source:MGI Symbol;Acc:MGI:2442092]	232341	P83741
ENSMUSG00000019850	27054.9	22606.8	31503	1.39352	0.478734	0.00261415	0.0564866	10	18876658	18891405	-	7226	Tnfaip3	GO:0001922;GO:0002020;GO:0002020;GO:0002237;GO:0002237;GO:0002237;GO:0002315;GO:0002632;GO:0002634;GO:0002637;GO:0002677;GO:0003677;GO:0003677;GO:0003824;GO:0004842;GO:0004842;GO:0004842;GO:0004843;GO:0004843;GO:0004843;GO:0004843;GO:0005515;GO:0005515;GO:0005515;GO:0005515;GO:0005634;GO:0005634;GO:0005634;GO:0005634;GO:0005737;GO:0005737;GO:0005737;GO:0005764;GO:0006508;GO:0006915;GO:0006954;GO:…	K11859	EC:3.4.19.12	T;K	13DPS;0WHDR;0IQZK;1979D;0B4UY;0V39Z;1DFG3;1BB3R;0E8HZ	tumor necrosis factor, alpha-induced protein 3 [Source:MGI Symbol;Acc:MGI:1196377]	21929	Q60769;Q7TQD1
ENSMUSG00000037098	68.3611	93.5897	43.1324	0.460867	-1.11758	0.0026438	0.0570424	17	26208010	26288529	-	6935	Rab11fip3	GO:0005509;GO:0005515;GO:0005654;GO:0005737;GO:0005768;GO:0005768;GO:0005813;GO:0005813;GO:0005813;GO:0005815;GO:0005856;GO:0007049;GO:0016020;GO:0016020;GO:0016192;GO:0030139;GO:0030496;GO:0030496;GO:0030496;GO:0031267;GO:0031267;GO:0031267;GO:0032154;GO:0032154;GO:0032154;GO:0032456;GO:0032456;GO:0032456;GO:0032456;GO:0032465;GO:0032465;GO:0032465;GO:0032465;GO:0034451;GO:0042803;GO:0042803;GO:…	K12485	-	Z;D	KOG0982;0VAF4;1AS8W;13K7U;09ZHY;1CVVU;0DM0X;18VPH;0UH7R	RAB11 family interacting protein 3 (class II) [Source:MGI Symbol;Acc:MGI:2444431]	215445	Q8CHD8
ENSMUSG00000030654	2879.5	2443.65	3315.35	1.35672	0.440121	0.00267533	0.0576368	7	117718114	117728885	-	2482	Arl6ip1	GO:0002038;GO:0005515;GO:0005515;GO:0005737;GO:0005783;GO:0005784;GO:0005784;GO:0005789;GO:0005789;GO:0005829;GO:0006613;GO:0006613;GO:0006915;GO:0012505;GO:0016020;GO:0016021;GO:0016021;GO:0016021;GO:0030176;GO:0030176;GO:0042802;GO:0043066;GO:0043066;GO:0043154;GO:0043154;GO:0071787;GO:0071787;GO:1903371;GO:1990809;GO:1990809;GO:0016020;GO:0016021;	-	-	U	0IHBG;13EXP;0DP9R;1CY7R;0UHJ1;0VCHB;18U9N;1B2E6;0A1MI	ADP-ribosylation factor-like 6 interacting protein 1 [Source:MGI Symbol;Acc:MGI:1858943]	54208	Q9JKW0;Q80ZW9
ENSMUSG00000042303	109.002	142.355	75.6496	0.531414	-0.912093	0.00268394	0.0577366	15	80861966	80896491	+	4477	Sgsm3	GO:0005096;GO:0005096;GO:0005096;GO:0005515;GO:0005515;GO:0005737;GO:0005829;GO:0005829;GO:0005921;GO:0006886;GO:0007049;GO:0007050;GO:0030695;GO:0031267;GO:0031267;GO:0031267;GO:0031267;GO:0032483;GO:0032483;GO:0032486;GO:0032486;GO:0043547;GO:0043547;GO:0045732;GO:0048227;GO:0048227;GO:0090630;	K20176	-	-	-	small G protein signaling modulator 3 [Source:MGI Symbol;Acc:MGI:1916329]	105835	Q8VCZ6
ENSMUSG00000030067	2306.08	1765.59	2846.57	1.61225	0.689076	0.00269825	0.0579585	6	98902299	99499682	-	13751	Foxp1	GO:0003677;GO:0003700;GO:0005634;GO:0006355;GO:0043565;GO:0046872;GO:0000122;GO:0000122;GO:0000122;GO:0000976;GO:0000978;GO:0000978;GO:0000981;GO:0000981;GO:0001227;GO:0001227;GO:0001701;GO:0002053;GO:0002329;GO:0002639;GO:0002903;GO:0003677;GO:0003677;GO:0003682;GO:0003700;GO:0003700;GO:0005515;GO:0005515;GO:0005634;GO:0005634;GO:0005634;GO:0005737;GO:0006355;GO:0006357;GO:0007507;GO:0007519;GO:…	K23582	-	K	1CREW;12PAE;09U0J;0DFAA;1ARMZ;0V4ZA;KOG4385;0UHRX;18UAJ	forkhead box P1 [Source:MGI Symbol;Acc:MGI:1914004]	108655	P58462
ENSMUSG00000031709	2240.27	1854.33	2626.21	1.41626	0.502082	0.00273225	0.0586019	8	83891981	83999563	+	5887	Tbc1d9	GO:0005096;GO:0005096;GO:0005509;GO:0006886;GO:0031267;GO:0090630;GO:0005096;GO:0005096;GO:0005509;GO:0006886;GO:0031267;GO:0090630;	K19951	-	S;Q;I	0DJDM;1AYDV;0UMTX;12QQU;0V8Y4;KOG4347;09WQB;18SNA;1CVMP	TBC1 domain family, member 9 [Source:MGI Symbol;Acc:MGI:1918560]	71310	Q3UYK3
ENSMUSG00000046031	873.718	396.933	1350.5	3.40234	1.76653	0.00274451	0.0587779	10	34002063	34003980	-	1094	Calhm6	GO:0005261;GO:0005887;GO:0006811;GO:0016020;GO:0016021;GO:0034220;GO:0098655;	-	-	P;U	0DF19;18SCW;1ARMF;0IGW7;0UG5K;0VEI7;13JMB;0A1EK;1CPEQ	calcium homeostasis modulator family member 6 [Source:MGI Symbol;Acc:MGI:2443082]	215900	Q8C9E8
ENSMUSG00000034826	863.179	714.902	1011.46	1.41482	0.500616	0.00275608	0.0588121	5	92563399	92583078	-	3328	Nup54	GO:0005634;GO:0005635;GO:0005635;GO:0005643;GO:0005643;GO:0005643;GO:0005643;GO:0006605;GO:0006605;GO:0006607;GO:0006913;GO:0006913;GO:0006999;GO:0015031;GO:0016020;GO:0017056;GO:0017056;GO:0017056;GO:0031965;GO:0032991;GO:0032991;GO:0036228;GO:0042306;GO:0042306;GO:0042802;GO:0042802;GO:0044613;GO:0044877;GO:0044877;GO:0051028;	K14308	-	Y;U	18VZJ;1CRVB;09VWZ;KOG3091;12PIZ;1B0S8;0UMH2;0V6T1;0DH53	nucleoporin 54 [Source:MGI Symbol;Acc:MGI:1920460]	269113	Q8BTS4
ENSMUSG00000024052	1668.27	1379.54	1957	1.41859	0.50446	0.0027611	0.0588121	17	71489555	71556812	+	12233	Lpin2	GO:0003713;GO:0003713;GO:0005634;GO:0005634;GO:0005737;GO:0005783;GO:0005789;GO:0005789;GO:0005829;GO:0005829;GO:0006629;GO:0006631;GO:0008195;GO:0008195;GO:0009062;GO:0016020;GO:0016311;GO:0016787;GO:0019432;GO:0032869;GO:0044255;GO:0045944;GO:0045944;GO:0003713;GO:0003713;GO:0005634;GO:0005634;GO:0005737;GO:0005783;GO:0005789;GO:0005789;GO:0005829;GO:0005829;GO:0006629;GO:0006631;GO:0008195;GO:…	K15728	EC:3.1.3.4	N;K;I	1CVEM;0UM8X;0V77W;0DHIV;KOG2116;09W9K;18WBH;1B45U;12PNV	lipin 2 [Source:MGI Symbol;Acc:MGI:1891341]	64898	Q99PI5
ENSMUSG00000024580	242.626	298.552	186.701	0.625354	-0.677255	0.00276234	0.0588121	18	61845495	61859396	-	6759	Grpel2	GO:0000774;GO:0000774;GO:0001405;GO:0005739;GO:0005739;GO:0005739;GO:0005743;GO:0005759;GO:0006457;GO:0030150;GO:0042803;GO:0050790;GO:0051082;GO:0051082;GO:0051087;GO:0000774;GO:0006457;GO:0042803;GO:0050790;GO:0051087;	K03687	-	O	KOG3003;0VCE2;1CQKS;0UHBR;0DP6M;0A1IJ;18V7A;1ASYH;13KW0	GrpE-like 2, mitochondrial [Source:MGI Symbol;Acc:MGI:1334416]	17714	O88396;Q0VB85
ENSMUSG00000030811	312.071	378.908	245.234	0.647212	-0.627691	0.00276546	0.0588121	7	127343715	127368655	+	4542	Fbxl19	GO:0003677;GO:0003677;GO:0008270;GO:0046872;GO:0000785;GO:0003677;GO:0003677;GO:0003712;GO:0005515;GO:0006357;GO:0006482;GO:0008270;GO:0008270;GO:0008270;GO:0016577;GO:0019005;GO:0032452;GO:0043161;GO:0045322;GO:0045322;GO:0046872;GO:0003677;GO:0003677;GO:0008270;GO:0046872;GO:0000785;GO:0003677;GO:0003677;GO:0003712;GO:0005515;GO:0006357;GO:0006482;GO:0008270;GO:0008270;GO:0008270;GO:0008270;GO:…	K10285	-	B	14U1B;1DD61;0WDBE;0V1IX;196WW;0E66S;0B0TW;1BAAG;KOG1633;KOG1947	F-box and leucine-rich repeat protein 19 [Source:MGI Symbol;Acc:MGI:3039600]	233902	Q6PB97
ENSMUSG00000039741	108.053	75.0758	141.029	1.87849	0.909573	0.00276639	0.0588121	11	120123773	120183122	+	11118	Bahcc1	GO:0003682;GO:0003682;GO:0003682;	-	-	K	1DGKQ;0WJM1;0IUIU;197IT;0B6US;0E9SI;13GTU;1BBNI;0V412	BAH domain and coiled-coil containing 1 [Source:MGI Symbol;Acc:MGI:2679272]	268515	Q3UHR0
ENSMUSG00000028381	1231.18	907.6	1554.75	1.71303	0.776554	0.00277172	0.0588392	4	59189257	59222833	+	5212	Ugcg	GO:0000139;GO:0000139;GO:0000139;GO:0000139;GO:0005794;GO:0006497;GO:0006629;GO:0006665;GO:0006679;GO:0006679;GO:0006679;GO:0006679;GO:0008120;GO:0008120;GO:0008120;GO:0008120;GO:0008120;GO:0009966;GO:0016020;GO:0016020;GO:0016021;GO:0016021;GO:0016021;GO:0016740;GO:0016757;GO:0016757;GO:0030154;GO:0030216;GO:0033210;GO:0048666;GO:0061436;GO:0098856;GO:0102769;GO:1903575;	K00720	EC:2.4.1.80	M;I;G	0V58B;12NMB;0UGCP;18TQI;1ASTF;09UEM;0DFQF;KOG2547;1CQE3	UDP-glucose ceramide glucosyltransferase [Source:MGI Symbol;Acc:MGI:1332243]	22234	O88693
ENSMUSG00000033538	3281.14	2668.17	3894.11	1.45947	0.545442	0.00280716	0.0594302	9	5308828	5336783	+	3710	Casp4	GO:0004197;GO:0006508;GO:0002376;GO:0004197;GO:0004197;GO:0004197;GO:0005515;GO:0005576;GO:0005737;GO:0005737;GO:0005739;GO:0005739;GO:0005783;GO:0005783;GO:0005789;GO:0005829;GO:0005829;GO:0005886;GO:0006508;GO:0006508;GO:0006508;GO:0006954;GO:0007015;GO:0008233;GO:0008233;GO:0008234;GO:0008234;GO:0012501;GO:0016020;GO:0016540;GO:0016540;GO:0016787;GO:0032731;GO:0032991;GO:0032991;GO:0035234;GO:…	K04394	-	D	1ARQT;0VAES;1CVVC;12S0S;0UFW8;0DM0G;18SGZ;09WHC;KOG3573	caspase 4, apoptosis-related cysteine peptidase [Source:MGI Symbol;Acc:MGI:107700]	12363	P70343
ENSMUSG00000026202	738.717	868.27	609.164	0.701584	-0.511312	0.00280776	0.0594302	1	75190872	75196509	-	3701	Tuba4a	GO:0000166;GO:0000226;GO:0000278;GO:0003924;GO:0005200;GO:0005200;GO:0005515;GO:0005525;GO:0005525;GO:0005525;GO:0005737;GO:0005737;GO:0005856;GO:0005856;GO:0005874;GO:0005874;GO:0005874;GO:0005874;GO:0007017;GO:0015630;GO:0019899;GO:0019901;GO:0000166;GO:0003924;GO:0003924;GO:0005200;GO:0005525;GO:0005525;GO:0005737;GO:0005856;GO:0005856;GO:0005874;GO:0005874;GO:0005874;GO:0007010;GO:0007017;GO:…	K07374	-	Z	0DGS2;09VHD;1ASNF;0UGZD;12P5T;1CRG5;0V6GK;KOG1376;18TJ9	tubulin, alpha 4A [Source:MGI Symbol;Acc:MGI:1095410]	22145	P68368
ENSMUSG00000039840	442.832	529.286	356.379	0.67332	-0.570635	0.00283851	0.0599935	18	77981680	78078228	+	10039	Epg5	GO:0003674;GO:0005737;GO:0005737;GO:0005764;GO:0005764;GO:0005764;GO:0006862;GO:0006862;GO:0006862;GO:0006914;GO:0006914;GO:0006914;GO:0008333;GO:0008333;GO:0008333;GO:0032456;GO:0034162;GO:0034162;GO:0034162;GO:0048471;GO:0048471;GO:0048471;GO:0097352;GO:0097352;GO:1990786;GO:1990786;GO:1990786;	K23883	-	S;E	09VAH;0V69S;KOG3622;1AXB3;1CS9T;12PTF;0DHJG;18XP7;0UIPH	ectopic P-granules autophagy protein 5 homolog (C. elegans) [Source:MGI Symbol;Acc:MGI:1918673]	100502841	Q80TA9
ENSMUSG00000024677	2680.57	1109.07	4252.07	3.83391	1.93882	0.00286103	0.0603816	19	11493876	11508620	+	4485	Ms4a6b	GO:0003674;GO:0005575;GO:0008150;GO:0016020;GO:0016021;GO:0016021;GO:0003674;GO:0005575;GO:0008150;GO:0016020;GO:0016021;GO:0016021;GO:0016020;GO:0016021;GO:0016021;	K22191	-	S	0UUPF;1D2N7;0DS71;0VGZN;193JN;1B37A;0A64Y;13W8M;0J2FM	membrane-spanning 4-domains, subfamily A, member 6B [Source:MGI Symbol;Acc:MGI:1917024]	69774	Q99N09
ENSMUSG00000024640	559.585	376.806	742.364	1.97015	0.978306	0.00287251	0.0605356	19	15882042	15924701	-	4254	Psat1	GO:0003824;GO:0004648;GO:0004648;GO:0004648;GO:0005737;GO:0005829;GO:0005829;GO:0006564;GO:0006564;GO:0006564;GO:0008483;GO:0008652;GO:0016740;GO:0030170;GO:0042802;GO:0042802;GO:0003824;GO:0004648;GO:0004648;GO:0006564;GO:0006564;GO:0008483;GO:0008652;GO:0016740;GO:0003824;	K00831	EC:2.6.1.52	E	1CU7F;09Y1X;KOG2790;0DJEX;0UN5J;12QVY;0V8ZE;18X3E;1B4EU	phosphoserine aminotransferase 1 [Source:MGI Symbol;Acc:MGI:2183441]	107272	Q99K85;Q543K5
ENSMUSG00000021263	44.7195	25.043	64.3961	2.57143	1.36257	0.00288403	0.0606902	12	108644970	108668570	-	2583	Degs2	GO:0006629;GO:0006629;GO:0016020;GO:0016021;GO:0000170;GO:0005783;GO:0005789;GO:0006629;GO:0006629;GO:0006667;GO:0006667;GO:0016020;GO:0016021;GO:0016021;GO:0016491;GO:0030148;GO:0030148;GO:0030148;GO:0042284;GO:0042284;GO:0042284;GO:0046513;GO:0055114;GO:0000170;GO:0000170;GO:0005783;GO:0005789;GO:0006629;GO:0006629;GO:0006667;GO:0006667;GO:0016020;GO:0016021;GO:0016021;GO:0016491;GO:0030148;GO:…	K04712	-	I	12Q90;09X8E;1CTAK;1AWJW;0V872;0DIJX;0UM48;KOG2987;18XH0	delta(4)-desaturase, sphingolipid 2 [Source:MGI Symbol;Acc:MGI:1917309]	70059	Q8R2F2
[truncated: 13,810 more rows]
