# Supplementary material for: Transcriptomics and quantitative proteomics reveal changes after second stimulation of bone marrow-derived macrophages from lupus-prone MRL/lpr mice
Source: Front Immunol. 2022 Oct 19;13:1004232. doi: 10.3389/fimmu.2022.1004232 (PMC9627492; doi:10.3389/fimmu.2022.1004232)
Supplement: Supplementary file 5 [file Table_5.xlsx]

## Sheet: Sheet1
PathwayID
