# Supplementary material for: Transcriptomics and quantitative proteomics reveal changes after second stimulation of bone marrow-derived macrophages from lupus-prone MRL/lpr mice
Source: Front Immunol. 2022 Oct 19;13:1004232. doi: 10.3389/fimmu.2022.1004232 (PMC9627492; doi:10.3389/fimmu.2022.1004232)
Supplement: Supplementary file 6 [file Table_6.xlsx]

## Sheet: Sheet1
Category	GO.ID	Term	Up	Down	DEG	Total	Pvalue	FDR	Up_Gene	Down_Gene
CC	GO:0005622	intracellular	1478	1531	3009	14178	4.96684e-81	7.76764e-77	ENSMUSG00000000078(Klf6),ENSMUSG00000000184(Ccnd2),ENSMUSG00000000275(Trim25),ENSMUSG00000000317(Bcl6b),ENSMUSG00000000409(Lck),ENSMUSG00000000441(Raf1),ENSMUSG00000000532(Acvr1b),ENSMUSG00000000555(Itga5),ENSMUSG00000000628(Hk2),ENSMUSG00000000730(Dnmt3l),ENSMUSG00000000732(Icosl),ENSMUSG00000000776(Polr3d),ENSMUSG00000000838(Fmr1),ENSMUSG00000000915(Hip1r),ENSMUSG00000000957(Mmp14),ENSMUSG00000…	ENSMUSG00000000028(Cdc45),ENSMUSG00000000037(Scml2),ENSMUSG00000000056(Narf),ENSMUSG00000000149(Gna12),ENSMUSG00000000282(Mnt),ENSMUSG00000000326(Comt),ENSMUSG00000000440(Pparg),ENSMUSG00000000631(Myo18a),ENSMUSG00000000693(Loxl3),ENSMUSG00000000751(Rpa1),ENSMUSG00000000823(Zfp512b),ENSMUSG00000000876(Pxmp4),ENSMUSG00000000881(Dlg3),ENSMUSG00000001053(N4bp3),ENSMUSG00000001054(Rmnd5b),ENSMUSG0000…
CC	GO:0005737	cytoplasm	1246	1243	2489	11011	1.35144e-80	1.05676e-76	ENSMUSG00000000078(Klf6),ENSMUSG00000000184(Ccnd2),ENSMUSG00000000275(Trim25),ENSMUSG00000000409(Lck),ENSMUSG00000000441(Raf1),ENSMUSG00000000532(Acvr1b),ENSMUSG00000000555(Itga5),ENSMUSG00000000628(Hk2),ENSMUSG00000000730(Dnmt3l),ENSMUSG00000000732(Icosl),ENSMUSG00000000776(Polr3d),ENSMUSG00000000838(Fmr1),ENSMUSG00000000915(Hip1r),ENSMUSG00000000957(Mmp14),ENSMUSG00000000982(Ccl3),ENSMUSG000000…	ENSMUSG00000000149(Gna12),ENSMUSG00000000326(Comt),ENSMUSG00000000440(Pparg),ENSMUSG00000000631(Myo18a),ENSMUSG00000000693(Loxl3),ENSMUSG00000000876(Pxmp4),ENSMUSG00000000881(Dlg3),ENSMUSG00000001053(N4bp3),ENSMUSG00000001054(Rmnd5b),ENSMUSG00000001143(Lman2l),ENSMUSG00000001228(Uhrf1),ENSMUSG00000001552(Jup),ENSMUSG00000001665(Gstt3),ENSMUSG00000001741(Il16),ENSMUSG00000001755(Coasy),ENSMUSG0000…
BP	GO:0002376	immune system process	545	224	769	2438	1.15853e-68	6.03942e-65	ENSMUSG00000000275(Trim25),ENSMUSG00000000317(Bcl6b),ENSMUSG00000000409(Lck),ENSMUSG00000000441(Raf1),ENSMUSG00000000532(Acvr1b),ENSMUSG00000000732(Icosl),ENSMUSG00000000776(Polr3d),ENSMUSG00000000957(Mmp14),ENSMUSG00000000982(Ccl3),ENSMUSG00000000983(Wfdc18),ENSMUSG00000001123(Lgals9),ENSMUSG00000001288(Rarg),ENSMUSG00000001300(Efnb2),ENSMUSG00000002111(Spi1),ENSMUSG00000002227(Mov10),ENSMUSG000…	ENSMUSG00000000440(Pparg),ENSMUSG00000000631(Myo18a),ENSMUSG00000000693(Loxl3),ENSMUSG00000000751(Rpa1),ENSMUSG00000000869(Il4),ENSMUSG00000001741(Il16),ENSMUSG00000001942(Siae),ENSMUSG00000003518(Dusp3),ENSMUSG00000003812(Dnase2a),ENSMUSG00000003882(Il7r),ENSMUSG00000005102(Eif2ak4),ENSMUSG00000005370(Msh6),ENSMUSG00000005583(Mef2c),ENSMUSG00000005951(Shpk),ENSMUSG00000005958(Ephb3),ENSMUSG00000…
BP	GO:0048583	regulation of response to stimulus	600	436	1036	3778	1.00718e-58	3.93781e-55	ENSMUSG00000000275(Trim25),ENSMUSG00000000317(Bcl6b),ENSMUSG00000000409(Lck),ENSMUSG00000000441(Raf1),ENSMUSG00000000532(Acvr1b),ENSMUSG00000000732(Icosl),ENSMUSG00000000776(Polr3d),ENSMUSG00000000915(Hip1r),ENSMUSG00000000957(Mmp14),ENSMUSG00000000982(Ccl3),ENSMUSG00000001098(Kctd10),ENSMUSG00000001123(Lgals9),ENSMUSG00000001175(Calm1),ENSMUSG00000001300(Efnb2),ENSMUSG00000001348(Acp5),ENSMUSG00…	ENSMUSG00000000149(Gna12),ENSMUSG00000000282(Mnt),ENSMUSG00000000440(Pparg),ENSMUSG00000000693(Loxl3),ENSMUSG00000000869(Il4),ENSMUSG00000001227(Sema6b),ENSMUSG00000001741(Il16),ENSMUSG00000001761(Smo),ENSMUSG00000001995(Sipa1l2),ENSMUSG00000002083(Bbc3),ENSMUSG00000002731(Prkra),ENSMUSG00000003452(Bicd1),ENSMUSG00000003518(Dusp3),ENSMUSG00000003812(Dnase2a),ENSMUSG00000003882(Il7r),ENSMUSG000000…
CC	GO:0043226	organelle	1332	1381	2713	12861	3.02059e-55	9.44781e-52	ENSMUSG00000000078(Klf6),ENSMUSG00000000184(Ccnd2),ENSMUSG00000000275(Trim25),ENSMUSG00000000317(Bcl6b),ENSMUSG00000000409(Lck),ENSMUSG00000000441(Raf1),ENSMUSG00000000555(Itga5),ENSMUSG00000000628(Hk2),ENSMUSG00000000682(Cd52),ENSMUSG00000000730(Dnmt3l),ENSMUSG00000000732(Icosl),ENSMUSG00000000776(Polr3d),ENSMUSG00000000838(Fmr1),ENSMUSG00000000915(Hip1r),ENSMUSG00000000957(Mmp14),ENSMUSG0000000…	ENSMUSG00000000028(Cdc45),ENSMUSG00000000037(Scml2),ENSMUSG00000000056(Narf),ENSMUSG00000000282(Mnt),ENSMUSG00000000326(Comt),ENSMUSG00000000440(Pparg),ENSMUSG00000000631(Myo18a),ENSMUSG00000000693(Loxl3),ENSMUSG00000000751(Rpa1),ENSMUSG00000000823(Zfp512b),ENSMUSG00000000876(Pxmp4),ENSMUSG00000000881(Dlg3),ENSMUSG00000001053(N4bp3),ENSMUSG00000001054(Rmnd5b),ENSMUSG00000001138(Cnnm3),ENSMUSG0000…
CC	GO:0043229	intracellular organelle	1310	1343	2653	12518	1.61038e-54	4.19745e-51	ENSMUSG00000000078(Klf6),ENSMUSG00000000184(Ccnd2),ENSMUSG00000000275(Trim25),ENSMUSG00000000317(Bcl6b),ENSMUSG00000000409(Lck),ENSMUSG00000000441(Raf1),ENSMUSG00000000555(Itga5),ENSMUSG00000000628(Hk2),ENSMUSG00000000730(Dnmt3l),ENSMUSG00000000732(Icosl),ENSMUSG00000000776(Polr3d),ENSMUSG00000000838(Fmr1),ENSMUSG00000000915(Hip1r),ENSMUSG00000000957(Mmp14),ENSMUSG00000001052(Sec24b),ENSMUSG00000…	ENSMUSG00000000028(Cdc45),ENSMUSG00000000037(Scml2),ENSMUSG00000000056(Narf),ENSMUSG00000000282(Mnt),ENSMUSG00000000326(Comt),ENSMUSG00000000440(Pparg),ENSMUSG00000000631(Myo18a),ENSMUSG00000000693(Loxl3),ENSMUSG00000000751(Rpa1),ENSMUSG00000000823(Zfp512b),ENSMUSG00000000876(Pxmp4),ENSMUSG00000001053(N4bp3),ENSMUSG00000001054(Rmnd5b),ENSMUSG00000001138(Cnnm3),ENSMUSG00000001143(Lman2l),ENSMUSG00…
BP	GO:0006950	response to stress	618	379	997	3676	1.6289e-53	3.6392e-50	ENSMUSG00000000275(Trim25),ENSMUSG00000000317(Bcl6b),ENSMUSG00000000409(Lck),ENSMUSG00000000441(Raf1),ENSMUSG00000000555(Itga5),ENSMUSG00000000628(Hk2),ENSMUSG00000000776(Polr3d),ENSMUSG00000000957(Mmp14),ENSMUSG00000000982(Ccl3),ENSMUSG00000000983(Wfdc18),ENSMUSG00000001123(Lgals9),ENSMUSG00000001348(Acp5),ENSMUSG00000001627(Ifrd1),ENSMUSG00000001707(Eef1e1),ENSMUSG00000002227(Mov10),ENSMUSG0000…	ENSMUSG00000000028(Cdc45),ENSMUSG00000000318(Clec10a),ENSMUSG00000000326(Comt),ENSMUSG00000000440(Pparg),ENSMUSG00000000631(Myo18a),ENSMUSG00000000693(Loxl3),ENSMUSG00000000751(Rpa1),ENSMUSG00000000869(Il4),ENSMUSG00000001228(Uhrf1),ENSMUSG00000001741(Il16),ENSMUSG00000001761(Smo),ENSMUSG00000002083(Bbc3),ENSMUSG00000002109(Ddb2),ENSMUSG00000002289(Angptl4),ENSMUSG00000002731(Prkra),ENSMUSG000000…
CC	GO:0043227	membrane-bounded organelle	1247	1208	2455	11414	6.02729e-52	1.17826e-48	ENSMUSG00000000078(Klf6),ENSMUSG00000000184(Ccnd2),ENSMUSG00000000275(Trim25),ENSMUSG00000000317(Bcl6b),ENSMUSG00000000409(Lck),ENSMUSG00000000441(Raf1),ENSMUSG00000000555(Itga5),ENSMUSG00000000628(Hk2),ENSMUSG00000000730(Dnmt3l),ENSMUSG00000000776(Polr3d),ENSMUSG00000000838(Fmr1),ENSMUSG00000000915(Hip1r),ENSMUSG00000000957(Mmp14),ENSMUSG00000001052(Sec24b),ENSMUSG00000001056(Nhp2),ENSMUSG000000…	ENSMUSG00000000028(Cdc45),ENSMUSG00000000037(Scml2),ENSMUSG00000000056(Narf),ENSMUSG00000000282(Mnt),ENSMUSG00000000326(Comt),ENSMUSG00000000440(Pparg),ENSMUSG00000000631(Myo18a),ENSMUSG00000000693(Loxl3),ENSMUSG00000000751(Rpa1),ENSMUSG00000000823(Zfp512b),ENSMUSG00000000876(Pxmp4),ENSMUSG00000001053(N4bp3),ENSMUSG00000001054(Rmnd5b),ENSMUSG00000001138(Cnnm3),ENSMUSG00000001143(Lman2l),ENSMUSG00…
BP	GO:0048518	positive regulation of biological process	837	635	1472	6072	9.34312e-51	1.62352e-47	ENSMUSG00000000078(Klf6),ENSMUSG00000000184(Ccnd2),ENSMUSG00000000275(Trim25),ENSMUSG00000000385(Tmprss2),ENSMUSG00000000409(Lck),ENSMUSG00000000441(Raf1),ENSMUSG00000000532(Acvr1b),ENSMUSG00000000555(Itga5),ENSMUSG00000000628(Hk2),ENSMUSG00000000730(Dnmt3l),ENSMUSG00000000732(Icosl),ENSMUSG00000000776(Polr3d),ENSMUSG00000000915(Hip1r),ENSMUSG00000000957(Mmp14),ENSMUSG00000000982(Ccl3),ENSMUSG000…	ENSMUSG00000000326(Comt),ENSMUSG00000000440(Pparg),ENSMUSG00000000631(Myo18a),ENSMUSG00000000693(Loxl3),ENSMUSG00000000751(Rpa1),ENSMUSG00000000869(Il4),ENSMUSG00000000881(Dlg3),ENSMUSG00000001227(Sema6b),ENSMUSG00000001228(Uhrf1),ENSMUSG00000001482(Def8),ENSMUSG00000001552(Jup),ENSMUSG00000001741(Il16),ENSMUSG00000001761(Smo),ENSMUSG00000002055(Spag5),ENSMUSG00000002068(Ccne1),ENSMUSG00000002083…
MF	GO:0005488	binding	1474	1383	2857	13870	8.91545e-50	1.39429e-46	ENSMUSG00000000078(Klf6),ENSMUSG00000000184(Ccnd2),ENSMUSG00000000275(Trim25),ENSMUSG00000000317(Bcl6b),ENSMUSG00000000409(Lck),ENSMUSG00000000441(Raf1),ENSMUSG00000000532(Acvr1b),ENSMUSG00000000555(Itga5),ENSMUSG00000000628(Hk2),ENSMUSG00000000730(Dnmt3l),ENSMUSG00000000732(Icosl),ENSMUSG00000000776(Polr3d),ENSMUSG00000000838(Fmr1),ENSMUSG00000000915(Hip1r),ENSMUSG00000000957(Mmp14),ENSMUSG00000…	ENSMUSG00000000028(Cdc45),ENSMUSG00000000037(Scml2),ENSMUSG00000000056(Narf),ENSMUSG00000000149(Gna12),ENSMUSG00000000253(Gmpr),ENSMUSG00000000282(Mnt),ENSMUSG00000000318(Clec10a),ENSMUSG00000000326(Comt),ENSMUSG00000000440(Pparg),ENSMUSG00000000631(Myo18a),ENSMUSG00000000693(Loxl3),ENSMUSG00000000751(Rpa1),ENSMUSG00000000869(Il4),ENSMUSG00000000881(Dlg3),ENSMUSG00000001053(N4bp3),ENSMUSG00000001…
BP	GO:0048519	negative regulation of biological process	744	595	1339	5434	7.3881e-49	1.05039e-45	ENSMUSG00000000184(Ccnd2),ENSMUSG00000000275(Trim25),ENSMUSG00000000317(Bcl6b),ENSMUSG00000000409(Lck),ENSMUSG00000000441(Raf1),ENSMUSG00000000532(Acvr1b),ENSMUSG00000000555(Itga5),ENSMUSG00000000628(Hk2),ENSMUSG00000000730(Dnmt3l),ENSMUSG00000000838(Fmr1),ENSMUSG00000000915(Hip1r),ENSMUSG00000000957(Mmp14),ENSMUSG00000000982(Ccl3),ENSMUSG00000000983(Wfdc18),ENSMUSG00000001098(Kctd10),ENSMUSG0000…	ENSMUSG00000000028(Cdc45),ENSMUSG00000000037(Scml2),ENSMUSG00000000149(Gna12),ENSMUSG00000000282(Mnt),ENSMUSG00000000326(Comt),ENSMUSG00000000440(Pparg),ENSMUSG00000000631(Myo18a),ENSMUSG00000000693(Loxl3),ENSMUSG00000000869(Il4),ENSMUSG00000000881(Dlg3),ENSMUSG00000001227(Sema6b),ENSMUSG00000001228(Uhrf1),ENSMUSG00000001552(Jup),ENSMUSG00000001761(Smo),ENSMUSG00000002068(Ccne1),ENSMUSG0000000208…
BP	GO:0035556	intracellular signal transduction	421	294	715	2449	9.65597e-49	1.25841e-45	ENSMUSG00000000275(Trim25),ENSMUSG00000000409(Lck),ENSMUSG00000000441(Raf1),ENSMUSG00000000982(Ccl3),ENSMUSG00000001098(Kctd10),ENSMUSG00000001175(Calm1),ENSMUSG00000001440(Kpnb1),ENSMUSG00000001630(Stk38l),ENSMUSG00000001707(Eef1e1),ENSMUSG00000002233(Rhoc),ENSMUSG00000002413(Braf),ENSMUSG00000002602(Axl),ENSMUSG00000002699(Lcp2),ENSMUSG00000002983(Relb),ENSMUSG00000002997(Prkar2b),ENSMUSG000000…	ENSMUSG00000000149(Gna12),ENSMUSG00000001482(Def8),ENSMUSG00000001761(Smo),ENSMUSG00000001995(Sipa1l2),ENSMUSG00000002083(Bbc3),ENSMUSG00000002731(Prkra),ENSMUSG00000003518(Dusp3),ENSMUSG00000004071(Cdip1),ENSMUSG00000004099(Dnmt1),ENSMUSG00000004633(Chn2),ENSMUSG00000005150(Wdr83),ENSMUSG00000005370(Msh6),ENSMUSG00000005580(Adcy9),ENSMUSG00000005583(Mef2c),ENSMUSG00000005718(Tfap4),ENSMUSG000000…
BP	GO:0006955	immune response	367	107	474	1417	1.79452e-48	2.15881e-45	ENSMUSG00000000275(Trim25),ENSMUSG00000000317(Bcl6b),ENSMUSG00000000409(Lck),ENSMUSG00000000732(Icosl),ENSMUSG00000000776(Polr3d),ENSMUSG00000000982(Ccl3),ENSMUSG00000000983(Wfdc18),ENSMUSG00000001123(Lgals9),ENSMUSG00000002413(Braf),ENSMUSG00000002602(Axl),ENSMUSG00000002699(Lcp2),ENSMUSG00000002897(Il17ra),ENSMUSG00000002983(Relb),ENSMUSG00000003283(Hck),ENSMUSG00000003352(Cacnb3),ENSMUSG000000…	ENSMUSG00000000440(Pparg),ENSMUSG00000000631(Myo18a),ENSMUSG00000000693(Loxl3),ENSMUSG00000000869(Il4),ENSMUSG00000003518(Dusp3),ENSMUSG00000003812(Dnase2a),ENSMUSG00000003882(Il7r),ENSMUSG00000005102(Eif2ak4),ENSMUSG00000005370(Msh6),ENSMUSG00000005583(Mef2c),ENSMUSG00000006611(Hfe),ENSMUSG00000013707(Tnfaip8l2),ENSMUSG00000016933(Plcg1),ENSMUSG00000017550(Atad5),ENSMUSG00000017697(Ada),ENSMUSG0…
BP	GO:0044237	cellular metabolic process	1155	1105	2260	10388	6.7632e-48	7.55498e-45	ENSMUSG00000000078(Klf6),ENSMUSG00000000184(Ccnd2),ENSMUSG00000000275(Trim25),ENSMUSG00000000317(Bcl6b),ENSMUSG00000000409(Lck),ENSMUSG00000000441(Raf1),ENSMUSG00000000532(Acvr1b),ENSMUSG00000000555(Itga5),ENSMUSG00000000628(Hk2),ENSMUSG00000000730(Dnmt3l),ENSMUSG00000000732(Icosl),ENSMUSG00000000776(Polr3d),ENSMUSG00000000838(Fmr1),ENSMUSG00000000915(Hip1r),ENSMUSG00000000957(Mmp14),ENSMUSG00000…	ENSMUSG00000000028(Cdc45),ENSMUSG00000000037(Scml2),ENSMUSG00000000149(Gna12),ENSMUSG00000000253(Gmpr),ENSMUSG00000000282(Mnt),ENSMUSG00000000326(Comt),ENSMUSG00000000440(Pparg),ENSMUSG00000000686(Abhd15),ENSMUSG00000000693(Loxl3),ENSMUSG00000000751(Rpa1),ENSMUSG00000000869(Il4),ENSMUSG00000000881(Dlg3),ENSMUSG00000001054(Rmnd5b),ENSMUSG00000001228(Uhrf1),ENSMUSG00000001552(Jup),ENSMUSG0000000166…
BP	GO:0002682	regulation of immune system process	305	132	437	1277	1.8287e-47	1.90661e-44	ENSMUSG00000000317(Bcl6b),ENSMUSG00000000409(Lck),ENSMUSG00000000532(Acvr1b),ENSMUSG00000000732(Icosl),ENSMUSG00000000776(Polr3d),ENSMUSG00000000957(Mmp14),ENSMUSG00000000982(Ccl3),ENSMUSG00000001123(Lgals9),ENSMUSG00000001288(Rarg),ENSMUSG00000001300(Efnb2),ENSMUSG00000002111(Spi1),ENSMUSG00000002413(Braf),ENSMUSG00000002602(Axl),ENSMUSG00000002699(Lcp2),ENSMUSG00000003352(Cacnb3),ENSMUSG0000000…	ENSMUSG00000000440(Pparg),ENSMUSG00000000631(Myo18a),ENSMUSG00000000693(Loxl3),ENSMUSG00000000869(Il4),ENSMUSG00000001942(Siae),ENSMUSG00000003518(Dusp3),ENSMUSG00000003812(Dnase2a),ENSMUSG00000003882(Il7r),ENSMUSG00000005102(Eif2ak4),ENSMUSG00000005583(Mef2c),ENSMUSG00000005951(Shpk),ENSMUSG00000006611(Hfe),ENSMUSG00000013707(Tnfaip8l2),ENSMUSG00000014158(Trpv4),ENSMUSG00000014361(Mertk),ENSMUSG…
BP	GO:0048523	negative regulation of cellular process	680	560	1240	4969	2.87337e-47	2.80854e-44	ENSMUSG00000000184(Ccnd2),ENSMUSG00000000317(Bcl6b),ENSMUSG00000000409(Lck),ENSMUSG00000000441(Raf1),ENSMUSG00000000532(Acvr1b),ENSMUSG00000000555(Itga5),ENSMUSG00000000628(Hk2),ENSMUSG00000000730(Dnmt3l),ENSMUSG00000000838(Fmr1),ENSMUSG00000000915(Hip1r),ENSMUSG00000000957(Mmp14),ENSMUSG00000000982(Ccl3),ENSMUSG00000000983(Wfdc18),ENSMUSG00000001098(Kctd10),ENSMUSG00000001123(Lgals9),ENSMUSG0000…	ENSMUSG00000000028(Cdc45),ENSMUSG00000000037(Scml2),ENSMUSG00000000149(Gna12),ENSMUSG00000000282(Mnt),ENSMUSG00000000326(Comt),ENSMUSG00000000440(Pparg),ENSMUSG00000000631(Myo18a),ENSMUSG00000000693(Loxl3),ENSMUSG00000000869(Il4),ENSMUSG00000000881(Dlg3),ENSMUSG00000001227(Sema6b),ENSMUSG00000001228(Uhrf1),ENSMUSG00000001552(Jup),ENSMUSG00000001761(Smo),ENSMUSG00000002068(Ccne1),ENSMUSG0000000208…
CC	GO:0005829	cytosol	566	448	1014	3875	9.79865e-47	9.01419e-44	ENSMUSG00000000078(Klf6),ENSMUSG00000000184(Ccnd2),ENSMUSG00000000275(Trim25),ENSMUSG00000000409(Lck),ENSMUSG00000000441(Raf1),ENSMUSG00000000532(Acvr1b),ENSMUSG00000000628(Hk2),ENSMUSG00000000776(Polr3d),ENSMUSG00000000915(Hip1r),ENSMUSG00000000957(Mmp14),ENSMUSG00000000982(Ccl3),ENSMUSG00000001052(Sec24b),ENSMUSG00000001098(Kctd10),ENSMUSG00000001123(Lgals9),ENSMUSG00000001175(Calm1),ENSMUSG000…	ENSMUSG00000000326(Comt),ENSMUSG00000000440(Pparg),ENSMUSG00000001054(Rmnd5b),ENSMUSG00000001552(Jup),ENSMUSG00000001741(Il16),ENSMUSG00000002104(Rapsn),ENSMUSG00000002257(Def6),ENSMUSG00000002486(Tchp),ENSMUSG00000002731(Prkra),ENSMUSG00000002803(Btbd6),ENSMUSG00000003282(Plag1),ENSMUSG00000003344(Btbd2),ENSMUSG00000003452(Bicd1),ENSMUSG00000003518(Dusp3),ENSMUSG00000003575(Crtc1),ENSMUSG0000000…
BP	GO:0023051	regulation of signaling	496	391	887	3279	4.49297e-46	3.90364e-43	ENSMUSG00000000275(Trim25),ENSMUSG00000000409(Lck),ENSMUSG00000000441(Raf1),ENSMUSG00000000532(Acvr1b),ENSMUSG00000000915(Hip1r),ENSMUSG00000000957(Mmp14),ENSMUSG00000000982(Ccl3),ENSMUSG00000001098(Kctd10),ENSMUSG00000001123(Lgals9),ENSMUSG00000001175(Calm1),ENSMUSG00000001707(Eef1e1),ENSMUSG00000001785(Pwp1),ENSMUSG00000002413(Braf),ENSMUSG00000002602(Axl),ENSMUSG00000002997(Prkar2b),ENSMUSG000…	ENSMUSG00000000149(Gna12),ENSMUSG00000000282(Mnt),ENSMUSG00000000440(Pparg),ENSMUSG00000000693(Loxl3),ENSMUSG00000000869(Il4),ENSMUSG00000001761(Smo),ENSMUSG00000001995(Sipa1l2),ENSMUSG00000002083(Bbc3),ENSMUSG00000002104(Rapsn),ENSMUSG00000002731(Prkra),ENSMUSG00000003378(Grik5),ENSMUSG00000003452(Bicd1),ENSMUSG00000003518(Dusp3),ENSMUSG00000003575(Crtc1),ENSMUSG00000003882(Il7r),ENSMUSG00000004…
BP	GO:0048522	positive regulation of cellular process	753	599	1352	5558	5.09157e-46	4.19089e-43	ENSMUSG00000000078(Klf6),ENSMUSG00000000184(Ccnd2),ENSMUSG00000000275(Trim25),ENSMUSG00000000409(Lck),ENSMUSG00000000441(Raf1),ENSMUSG00000000532(Acvr1b),ENSMUSG00000000555(Itga5),ENSMUSG00000000628(Hk2),ENSMUSG00000000730(Dnmt3l),ENSMUSG00000000732(Icosl),ENSMUSG00000000915(Hip1r),ENSMUSG00000000957(Mmp14),ENSMUSG00000000982(Ccl3),ENSMUSG00000001123(Lgals9),ENSMUSG00000001175(Calm1),ENSMUSG00000…	ENSMUSG00000000326(Comt),ENSMUSG00000000440(Pparg),ENSMUSG00000000631(Myo18a),ENSMUSG00000000693(Loxl3),ENSMUSG00000000751(Rpa1),ENSMUSG00000000869(Il4),ENSMUSG00000000881(Dlg3),ENSMUSG00000001227(Sema6b),ENSMUSG00000001228(Uhrf1),ENSMUSG00000001482(Def8),ENSMUSG00000001552(Jup),ENSMUSG00000001761(Smo),ENSMUSG00000002055(Spag5),ENSMUSG00000002068(Ccne1),ENSMUSG00000002083(Bbc3),ENSMUSG00000002104…
BP	GO:0009966	regulation of signal transduction	452	339	791	2836	7.35573e-46	5.75182e-43	ENSMUSG00000000275(Trim25),ENSMUSG00000000409(Lck),ENSMUSG00000000441(Raf1),ENSMUSG00000000532(Acvr1b),ENSMUSG00000000915(Hip1r),ENSMUSG00000000957(Mmp14),ENSMUSG00000000982(Ccl3),ENSMUSG00000001098(Kctd10),ENSMUSG00000001123(Lgals9),ENSMUSG00000001175(Calm1),ENSMUSG00000001707(Eef1e1),ENSMUSG00000001785(Pwp1),ENSMUSG00000002413(Braf),ENSMUSG00000002602(Axl),ENSMUSG00000002997(Prkar2b),ENSMUSG000…	ENSMUSG00000000149(Gna12),ENSMUSG00000000282(Mnt),ENSMUSG00000000440(Pparg),ENSMUSG00000000693(Loxl3),ENSMUSG00000000869(Il4),ENSMUSG00000001761(Smo),ENSMUSG00000001995(Sipa1l2),ENSMUSG00000002083(Bbc3),ENSMUSG00000002731(Prkra),ENSMUSG00000003452(Bicd1),ENSMUSG00000003518(Dusp3),ENSMUSG00000003882(Il7r),ENSMUSG00000004633(Chn2),ENSMUSG00000005150(Wdr83),ENSMUSG00000005514(Por),ENSMUSG00000005583…
BP	GO:0006952	defense response	388	109	497	1541	8.99426e-46	6.69815e-43	ENSMUSG00000000275(Trim25),ENSMUSG00000000317(Bcl6b),ENSMUSG00000000409(Lck),ENSMUSG00000000776(Polr3d),ENSMUSG00000000982(Ccl3),ENSMUSG00000000983(Wfdc18),ENSMUSG00000001123(Lgals9),ENSMUSG00000001348(Acp5),ENSMUSG00000002227(Mov10),ENSMUSG00000002602(Axl),ENSMUSG00000002897(Il17ra),ENSMUSG00000002983(Relb),ENSMUSG00000003283(Hck),ENSMUSG00000004040(Stat3),ENSMUSG00000004043(Stat5a),ENSMUSG00000…	ENSMUSG00000000318(Clec10a),ENSMUSG00000000440(Pparg),ENSMUSG00000000631(Myo18a),ENSMUSG00000000693(Loxl3),ENSMUSG00000000869(Il4),ENSMUSG00000001741(Il16),ENSMUSG00000001761(Smo),ENSMUSG00000003882(Il7r),ENSMUSG00000004768(Rab23),ENSMUSG00000005102(Eif2ak4),ENSMUSG00000005150(Wdr83),ENSMUSG00000005583(Mef2c),ENSMUSG00000005951(Shpk),ENSMUSG00000006611(Hfe),ENSMUSG00000008845(Cd163),ENSMUSG000000…
BP	GO:0010646	regulation of cell communication	494	388	882	3264	1.46187e-45	1.03919e-42	ENSMUSG00000000275(Trim25),ENSMUSG00000000409(Lck),ENSMUSG00000000441(Raf1),ENSMUSG00000000532(Acvr1b),ENSMUSG00000000915(Hip1r),ENSMUSG00000000957(Mmp14),ENSMUSG00000000982(Ccl3),ENSMUSG00000001098(Kctd10),ENSMUSG00000001123(Lgals9),ENSMUSG00000001175(Calm1),ENSMUSG00000001707(Eef1e1),ENSMUSG00000001785(Pwp1),ENSMUSG00000002413(Braf),ENSMUSG00000002602(Axl),ENSMUSG00000002997(Prkar2b),ENSMUSG000…	ENSMUSG00000000149(Gna12),ENSMUSG00000000282(Mnt),ENSMUSG00000000440(Pparg),ENSMUSG00000000693(Loxl3),ENSMUSG00000000869(Il4),ENSMUSG00000001761(Smo),ENSMUSG00000001995(Sipa1l2),ENSMUSG00000002083(Bbc3),ENSMUSG00000002104(Rapsn),ENSMUSG00000002731(Prkra),ENSMUSG00000003378(Grik5),ENSMUSG00000003452(Bicd1),ENSMUSG00000003518(Dusp3),ENSMUSG00000003575(Crtc1),ENSMUSG00000003882(Il7r),ENSMUSG00000004…
MF	GO:0005515	protein binding	1084	909	1993	8968	6.52464e-45	4.43647e-42	ENSMUSG00000000184(Ccnd2),ENSMUSG00000000275(Trim25),ENSMUSG00000000317(Bcl6b),ENSMUSG00000000409(Lck),ENSMUSG00000000441(Raf1),ENSMUSG00000000532(Acvr1b),ENSMUSG00000000555(Itga5),ENSMUSG00000000628(Hk2),ENSMUSG00000000730(Dnmt3l),ENSMUSG00000000732(Icosl),ENSMUSG00000000915(Hip1r),ENSMUSG00000000957(Mmp14),ENSMUSG00000000982(Ccl3),ENSMUSG00000001052(Sec24b),ENSMUSG00000001056(Nhp2),ENSMUSG00000…	ENSMUSG00000000037(Scml2),ENSMUSG00000000056(Narf),ENSMUSG00000000149(Gna12),ENSMUSG00000000282(Mnt),ENSMUSG00000000440(Pparg),ENSMUSG00000000631(Myo18a),ENSMUSG00000000693(Loxl3),ENSMUSG00000000869(Il4),ENSMUSG00000000881(Dlg3),ENSMUSG00000001053(N4bp3),ENSMUSG00000001227(Sema6b),ENSMUSG00000001228(Uhrf1),ENSMUSG00000001482(Def8),ENSMUSG00000001552(Jup),ENSMUSG00000001741(Il16),ENSMUSG0000000176…
BP	GO:0008152	metabolic process	1249	1187	2436	11471	7.86279e-45	5.12359e-42	ENSMUSG00000000078(Klf6),ENSMUSG00000000184(Ccnd2),ENSMUSG00000000275(Trim25),ENSMUSG00000000317(Bcl6b),ENSMUSG00000000385(Tmprss2),ENSMUSG00000000409(Lck),ENSMUSG00000000441(Raf1),ENSMUSG00000000532(Acvr1b),ENSMUSG00000000555(Itga5),ENSMUSG00000000628(Hk2),ENSMUSG00000000730(Dnmt3l),ENSMUSG00000000732(Icosl),ENSMUSG00000000776(Polr3d),ENSMUSG00000000838(Fmr1),ENSMUSG00000000915(Hip1r),ENSMUSG000…	ENSMUSG00000000028(Cdc45),ENSMUSG00000000037(Scml2),ENSMUSG00000000149(Gna12),ENSMUSG00000000253(Gmpr),ENSMUSG00000000282(Mnt),ENSMUSG00000000326(Comt),ENSMUSG00000000440(Pparg),ENSMUSG00000000686(Abhd15),ENSMUSG00000000693(Loxl3),ENSMUSG00000000751(Rpa1),ENSMUSG00000000869(Il4),ENSMUSG00000000881(Dlg3),ENSMUSG00000001054(Rmnd5b),ENSMUSG00000001228(Uhrf1),ENSMUSG00000001552(Jup),ENSMUSG0000000166…
BP	GO:0051707	response to other organism	361	96	457	1390	2.15886e-44	1.32352e-41	ENSMUSG00000000204(Slfn4),ENSMUSG00000000275(Trim25),ENSMUSG00000000409(Lck),ENSMUSG00000000682(Cd52),ENSMUSG00000000776(Polr3d),ENSMUSG00000000982(Ccl3),ENSMUSG00000000983(Wfdc18),ENSMUSG00000001123(Lgals9),ENSMUSG00000001348(Acp5),ENSMUSG00000002227(Mov10),ENSMUSG00000002602(Axl),ENSMUSG00000002658(Gtf2f1),ENSMUSG00000002897(Il17ra),ENSMUSG00000002983(Relb),ENSMUSG00000003283(Hck),ENSMUSG000000…	ENSMUSG00000000326(Comt),ENSMUSG00000000440(Pparg),ENSMUSG00000000631(Myo18a),ENSMUSG00000000869(Il4),ENSMUSG00000003882(Il7r),ENSMUSG00000005102(Eif2ak4),ENSMUSG00000005150(Wdr83),ENSMUSG00000005583(Mef2c),ENSMUSG00000005951(Shpk),ENSMUSG00000008855(Hdac5),ENSMUSG00000010047(Hyal2),ENSMUSG00000010051(Hyal1),ENSMUSG00000010054(Tusc2),ENSMUSG00000013707(Tnfaip8l2),ENSMUSG00000019726(Lyst),ENSMUSG0…
BP	GO:0071704	organic substance metabolic process	1204	1134	2338	10919	2.20037e-44	1.32352e-41	ENSMUSG00000000078(Klf6),ENSMUSG00000000184(Ccnd2),ENSMUSG00000000275(Trim25),ENSMUSG00000000317(Bcl6b),ENSMUSG00000000385(Tmprss2),ENSMUSG00000000409(Lck),ENSMUSG00000000441(Raf1),ENSMUSG00000000532(Acvr1b),ENSMUSG00000000555(Itga5),ENSMUSG00000000628(Hk2),ENSMUSG00000000730(Dnmt3l),ENSMUSG00000000732(Icosl),ENSMUSG00000000776(Polr3d),ENSMUSG00000000838(Fmr1),ENSMUSG00000000915(Hip1r),ENSMUSG000…	ENSMUSG00000000028(Cdc45),ENSMUSG00000000037(Scml2),ENSMUSG00000000149(Gna12),ENSMUSG00000000253(Gmpr),ENSMUSG00000000282(Mnt),ENSMUSG00000000326(Comt),ENSMUSG00000000440(Pparg),ENSMUSG00000000686(Abhd15),ENSMUSG00000000693(Loxl3),ENSMUSG00000000751(Rpa1),ENSMUSG00000000869(Il4),ENSMUSG00000000881(Dlg3),ENSMUSG00000001054(Rmnd5b),ENSMUSG00000001228(Uhrf1),ENSMUSG00000001552(Jup),ENSMUSG0000000166…
BP	GO:0043207	response to external biotic stimulus	361	96	457	1393	4.10607e-44	2.31484e-41	ENSMUSG00000000204(Slfn4),ENSMUSG00000000275(Trim25),ENSMUSG00000000409(Lck),ENSMUSG00000000682(Cd52),ENSMUSG00000000776(Polr3d),ENSMUSG00000000982(Ccl3),ENSMUSG00000000983(Wfdc18),ENSMUSG00000001123(Lgals9),ENSMUSG00000001348(Acp5),ENSMUSG00000002227(Mov10),ENSMUSG00000002602(Axl),ENSMUSG00000002658(Gtf2f1),ENSMUSG00000002897(Il17ra),ENSMUSG00000002983(Relb),ENSMUSG00000003283(Hck),ENSMUSG000000…	ENSMUSG00000000326(Comt),ENSMUSG00000000440(Pparg),ENSMUSG00000000631(Myo18a),ENSMUSG00000000869(Il4),ENSMUSG00000003882(Il7r),ENSMUSG00000005102(Eif2ak4),ENSMUSG00000005150(Wdr83),ENSMUSG00000005583(Mef2c),ENSMUSG00000005951(Shpk),ENSMUSG00000008855(Hdac5),ENSMUSG00000010047(Hyal2),ENSMUSG00000010051(Hyal1),ENSMUSG00000010054(Tusc2),ENSMUSG00000013707(Tnfaip8l2),ENSMUSG00000019726(Lyst),ENSMUSG0…
BP	GO:0044419	interspecies interaction between organisms	387	120	507	1602	4.14448e-44	2.31484e-41	ENSMUSG00000000204(Slfn4),ENSMUSG00000000275(Trim25),ENSMUSG00000000385(Tmprss2),ENSMUSG00000000409(Lck),ENSMUSG00000000682(Cd52),ENSMUSG00000000776(Polr3d),ENSMUSG00000000982(Ccl3),ENSMUSG00000000983(Wfdc18),ENSMUSG00000001123(Lgals9),ENSMUSG00000001348(Acp5),ENSMUSG00000002227(Mov10),ENSMUSG00000002602(Axl),ENSMUSG00000002658(Gtf2f1),ENSMUSG00000002845(Tmem39a),ENSMUSG00000002897(Il17ra),ENSMUS…	ENSMUSG00000000326(Comt),ENSMUSG00000000440(Pparg),ENSMUSG00000000631(Myo18a),ENSMUSG00000000869(Il4),ENSMUSG00000003452(Bicd1),ENSMUSG00000003882(Il7r),ENSMUSG00000004798(Ulk2),ENSMUSG00000005102(Eif2ak4),ENSMUSG00000005150(Wdr83),ENSMUSG00000005583(Mef2c),ENSMUSG00000005718(Tfap4),ENSMUSG00000005951(Shpk),ENSMUSG00000006235(Epor),ENSMUSG00000008855(Hdac5),ENSMUSG00000010047(Hyal2),ENSMUSG000000…
BP	GO:0009607	response to biotic stimulus	363	99	462	1425	4.43037e-43	2.38919e-40	ENSMUSG00000000204(Slfn4),ENSMUSG00000000275(Trim25),ENSMUSG00000000409(Lck),ENSMUSG00000000682(Cd52),ENSMUSG00000000776(Polr3d),ENSMUSG00000000982(Ccl3),ENSMUSG00000000983(Wfdc18),ENSMUSG00000001123(Lgals9),ENSMUSG00000001348(Acp5),ENSMUSG00000002227(Mov10),ENSMUSG00000002602(Axl),ENSMUSG00000002658(Gtf2f1),ENSMUSG00000002897(Il17ra),ENSMUSG00000002983(Relb),ENSMUSG00000003283(Hck),ENSMUSG000000…	ENSMUSG00000000326(Comt),ENSMUSG00000000440(Pparg),ENSMUSG00000000631(Myo18a),ENSMUSG00000000869(Il4),ENSMUSG00000001761(Smo),ENSMUSG00000003882(Il7r),ENSMUSG00000005102(Eif2ak4),ENSMUSG00000005150(Wdr83),ENSMUSG00000005583(Mef2c),ENSMUSG00000005951(Shpk),ENSMUSG00000008855(Hdac5),ENSMUSG00000010047(Hyal2),ENSMUSG00000010051(Hyal1),ENSMUSG00000010054(Tusc2),ENSMUSG00000013707(Tnfaip8l2),ENSMUSG00…
BP	GO:0009605	response to external stimulus	525	236	761	2758	5.02586e-42	2.61998e-39	ENSMUSG00000000204(Slfn4),ENSMUSG00000000275(Trim25),ENSMUSG00000000317(Bcl6b),ENSMUSG00000000409(Lck),ENSMUSG00000000441(Raf1),ENSMUSG00000000682(Cd52),ENSMUSG00000000776(Polr3d),ENSMUSG00000000957(Mmp14),ENSMUSG00000000982(Ccl3),ENSMUSG00000000983(Wfdc18),ENSMUSG00000001123(Lgals9),ENSMUSG00000001300(Efnb2),ENSMUSG00000001348(Acp5),ENSMUSG00000001663(Gstt1),ENSMUSG00000002227(Mov10),ENSMUSG0000…	ENSMUSG00000000326(Comt),ENSMUSG00000000440(Pparg),ENSMUSG00000000631(Myo18a),ENSMUSG00000000869(Il4),ENSMUSG00000001227(Sema6b),ENSMUSG00000001552(Jup),ENSMUSG00000001741(Il16),ENSMUSG00000001761(Smo),ENSMUSG00000002289(Angptl4),ENSMUSG00000003518(Dusp3),ENSMUSG00000003575(Crtc1),ENSMUSG00000003882(Il7r),ENSMUSG00000004151(Etv1),ENSMUSG00000004798(Ulk2),ENSMUSG00000005102(Eif2ak4),ENSMUSG0000000…
CC	GO:0043231	intracellular membrane-bounded organelle	1154	1132	2286	10693	6.14086e-42	3.09796e-39	ENSMUSG00000000078(Klf6),ENSMUSG00000000184(Ccnd2),ENSMUSG00000000275(Trim25),ENSMUSG00000000317(Bcl6b),ENSMUSG00000000441(Raf1),ENSMUSG00000000555(Itga5),ENSMUSG00000000628(Hk2),ENSMUSG00000000730(Dnmt3l),ENSMUSG00000000776(Polr3d),ENSMUSG00000000838(Fmr1),ENSMUSG00000000915(Hip1r),ENSMUSG00000000957(Mmp14),ENSMUSG00000001052(Sec24b),ENSMUSG00000001056(Nhp2),ENSMUSG00000001098(Kctd10),ENSMUSG000…	ENSMUSG00000000028(Cdc45),ENSMUSG00000000037(Scml2),ENSMUSG00000000056(Narf),ENSMUSG00000000282(Mnt),ENSMUSG00000000326(Comt),ENSMUSG00000000440(Pparg),ENSMUSG00000000631(Myo18a),ENSMUSG00000000693(Loxl3),ENSMUSG00000000751(Rpa1),ENSMUSG00000000823(Zfp512b),ENSMUSG00000000876(Pxmp4),ENSMUSG00000001054(Rmnd5b),ENSMUSG00000001138(Cnnm3),ENSMUSG00000001143(Lman2l),ENSMUSG00000001228(Uhrf1),ENSMUSG00…
BP	GO:0034097	response to cytokine	257	76	333	919	8.8896e-42	4.34451e-39	ENSMUSG00000000275(Trim25),ENSMUSG00000000628(Hk2),ENSMUSG00000000982(Ccl3),ENSMUSG00000001288(Rarg),ENSMUSG00000001348(Acp5),ENSMUSG00000001707(Eef1e1),ENSMUSG00000002111(Spi1),ENSMUSG00000002602(Axl),ENSMUSG00000002897(Il17ra),ENSMUSG00000002983(Relb),ENSMUSG00000003206(Ebi3),ENSMUSG00000004040(Stat3),ENSMUSG00000004043(Stat5a),ENSMUSG00000004266(Ptpn6),ENSMUSG00000004296(Il12b),ENSMUSG00000005…	ENSMUSG00000000440(Pparg),ENSMUSG00000000631(Myo18a),ENSMUSG00000002870(Mcm2),ENSMUSG00000003882(Il7r),ENSMUSG00000004071(Cdip1),ENSMUSG00000005951(Shpk),ENSMUSG00000006235(Epor),ENSMUSG00000010047(Hyal2),ENSMUSG00000010051(Hyal1),ENSMUSG00000013483(Card14),ENSMUSG00000015766(Eps8),ENSMUSG00000017146(Brca1),ENSMUSG00000017466(Timp2),ENSMUSG00000018199(Ro60),ENSMUSG00000020263(Appl2),ENSMUSG000000…
BP	GO:0065009	regulation of molecular function	467	349	816	3039	1.59684e-40	7.56756e-38	ENSMUSG00000000184(Ccnd2),ENSMUSG00000000275(Trim25),ENSMUSG00000000409(Lck),ENSMUSG00000000441(Raf1),ENSMUSG00000000730(Dnmt3l),ENSMUSG00000000915(Hip1r),ENSMUSG00000000982(Ccl3),ENSMUSG00000000983(Wfdc18),ENSMUSG00000001123(Lgals9),ENSMUSG00000001175(Calm1),ENSMUSG00000001627(Ifrd1),ENSMUSG00000001632(Brpf1),ENSMUSG00000002233(Rhoc),ENSMUSG00000002307(Daxx),ENSMUSG00000002413(Braf),ENSMUSG00000…	ENSMUSG00000000440(Pparg),ENSMUSG00000000869(Il4),ENSMUSG00000000881(Dlg3),ENSMUSG00000001552(Jup),ENSMUSG00000001761(Smo),ENSMUSG00000001995(Sipa1l2),ENSMUSG00000002068(Ccne1),ENSMUSG00000002083(Bbc3),ENSMUSG00000002289(Angptl4),ENSMUSG00000002731(Prkra),ENSMUSG00000002870(Mcm2),ENSMUSG00000003134(Tbc1d8),ENSMUSG00000003452(Bicd1),ENSMUSG00000003518(Dusp3),ENSMUSG00000003575(Crtc1),ENSMUSG000000…
BP	GO:0009893	positive regulation of metabolic process	566	411	977	3814	3.59459e-40	1.65341e-37	ENSMUSG00000000078(Klf6),ENSMUSG00000000184(Ccnd2),ENSMUSG00000000275(Trim25),ENSMUSG00000000409(Lck),ENSMUSG00000000441(Raf1),ENSMUSG00000000532(Acvr1b),ENSMUSG00000000555(Itga5),ENSMUSG00000000628(Hk2),ENSMUSG00000000730(Dnmt3l),ENSMUSG00000000732(Icosl),ENSMUSG00000000776(Polr3d),ENSMUSG00000000915(Hip1r),ENSMUSG00000000957(Mmp14),ENSMUSG00000000982(Ccl3),ENSMUSG00000001123(Lgals9),ENSMUSG0000…	ENSMUSG00000000326(Comt),ENSMUSG00000000440(Pparg),ENSMUSG00000000869(Il4),ENSMUSG00000000881(Dlg3),ENSMUSG00000001228(Uhrf1),ENSMUSG00000001552(Jup),ENSMUSG00000001741(Il16),ENSMUSG00000001761(Smo),ENSMUSG00000002083(Bbc3),ENSMUSG00000002289(Angptl4),ENSMUSG00000002409(Dyrk1b),ENSMUSG00000003282(Plag1),ENSMUSG00000003575(Crtc1),ENSMUSG00000003882(Il7r),ENSMUSG00000003992(Ssbp2),ENSMUSG0000000409…
BP	GO:0044238	primary metabolic process	1130	1077	2207	10291	5.76338e-40	2.57524e-37	ENSMUSG00000000078(Klf6),ENSMUSG00000000184(Ccnd2),ENSMUSG00000000275(Trim25),ENSMUSG00000000317(Bcl6b),ENSMUSG00000000385(Tmprss2),ENSMUSG00000000409(Lck),ENSMUSG00000000441(Raf1),ENSMUSG00000000532(Acvr1b),ENSMUSG00000000555(Itga5),ENSMUSG00000000628(Hk2),ENSMUSG00000000730(Dnmt3l),ENSMUSG00000000732(Icosl),ENSMUSG00000000776(Polr3d),ENSMUSG00000000838(Fmr1),ENSMUSG00000000915(Hip1r),ENSMUSG000…	ENSMUSG00000000028(Cdc45),ENSMUSG00000000037(Scml2),ENSMUSG00000000149(Gna12),ENSMUSG00000000253(Gmpr),ENSMUSG00000000282(Mnt),ENSMUSG00000000326(Comt),ENSMUSG00000000440(Pparg),ENSMUSG00000000686(Abhd15),ENSMUSG00000000693(Loxl3),ENSMUSG00000000751(Rpa1),ENSMUSG00000000869(Il4),ENSMUSG00000000881(Dlg3),ENSMUSG00000001054(Rmnd5b),ENSMUSG00000001228(Uhrf1),ENSMUSG00000001552(Jup),ENSMUSG0000000175…
BP	GO:0071310	cellular response to organic substance	423	251	674	2413	1.35986e-38	5.90744e-36	ENSMUSG00000000275(Trim25),ENSMUSG00000000441(Raf1),ENSMUSG00000000532(Acvr1b),ENSMUSG00000000628(Hk2),ENSMUSG00000000982(Ccl3),ENSMUSG00000001248(Gramd1a),ENSMUSG00000001288(Rarg),ENSMUSG00000001707(Eef1e1),ENSMUSG00000002111(Spi1),ENSMUSG00000002307(Daxx),ENSMUSG00000002413(Braf),ENSMUSG00000002602(Axl),ENSMUSG00000002897(Il17ra),ENSMUSG00000003206(Ebi3),ENSMUSG00000003665(Has1),ENSMUSG00000004…	ENSMUSG00000000440(Pparg),ENSMUSG00000000631(Myo18a),ENSMUSG00000000869(Il4),ENSMUSG00000001552(Jup),ENSMUSG00000001761(Smo),ENSMUSG00000002870(Mcm2),ENSMUSG00000003378(Grik5),ENSMUSG00000003518(Dusp3),ENSMUSG00000003882(Il7r),ENSMUSG00000004071(Cdip1),ENSMUSG00000004099(Dnmt1),ENSMUSG00000004347(Pde1c),ENSMUSG00000004698(Hdac9),ENSMUSG00000005102(Eif2ak4),ENSMUSG00000005374(Tbl2),ENSMUSG00000005…
BP	GO:0070887	cellular response to chemical stimulus	501	306	807	3046	1.05764e-37	4.47041e-35	ENSMUSG00000000275(Trim25),ENSMUSG00000000441(Raf1),ENSMUSG00000000532(Acvr1b),ENSMUSG00000000628(Hk2),ENSMUSG00000000982(Ccl3),ENSMUSG00000001248(Gramd1a),ENSMUSG00000001288(Rarg),ENSMUSG00000001663(Gstt1),ENSMUSG00000001707(Eef1e1),ENSMUSG00000002111(Spi1),ENSMUSG00000002307(Daxx),ENSMUSG00000002413(Braf),ENSMUSG00000002602(Axl),ENSMUSG00000002897(Il17ra),ENSMUSG00000002983(Relb),ENSMUSG0000000…	ENSMUSG00000000440(Pparg),ENSMUSG00000000631(Myo18a),ENSMUSG00000000869(Il4),ENSMUSG00000001552(Jup),ENSMUSG00000001741(Il16),ENSMUSG00000001761(Smo),ENSMUSG00000002731(Prkra),ENSMUSG00000002870(Mcm2),ENSMUSG00000003378(Grik5),ENSMUSG00000003518(Dusp3),ENSMUSG00000003882(Il7r),ENSMUSG00000004071(Cdip1),ENSMUSG00000004099(Dnmt1),ENSMUSG00000004347(Pde1c),ENSMUSG00000004698(Hdac9),ENSMUSG0000000510…
BP	GO:0071345	cellular response to cytokine stimulus	225	69	294	806	1.74858e-37	7.19632e-35	ENSMUSG00000000275(Trim25),ENSMUSG00000000628(Hk2),ENSMUSG00000000982(Ccl3),ENSMUSG00000001288(Rarg),ENSMUSG00000001707(Eef1e1),ENSMUSG00000002111(Spi1),ENSMUSG00000002602(Axl),ENSMUSG00000002897(Il17ra),ENSMUSG00000003206(Ebi3),ENSMUSG00000004040(Stat3),ENSMUSG00000004043(Stat5a),ENSMUSG00000004266(Ptpn6),ENSMUSG00000004296(Il12b),ENSMUSG00000005057(Sh2b2),ENSMUSG00000005087(Cd44),ENSMUSG0000000…	ENSMUSG00000000440(Pparg),ENSMUSG00000000631(Myo18a),ENSMUSG00000002870(Mcm2),ENSMUSG00000003882(Il7r),ENSMUSG00000004071(Cdip1),ENSMUSG00000005951(Shpk),ENSMUSG00000006235(Epor),ENSMUSG00000010047(Hyal2),ENSMUSG00000010051(Hyal1),ENSMUSG00000013483(Card14),ENSMUSG00000015766(Eps8),ENSMUSG00000017146(Brca1),ENSMUSG00000018199(Ro60),ENSMUSG00000020263(Appl2),ENSMUSG00000020546(Stxbp4),ENSMUSG00000…
BP	GO:0031347	regulation of defense response	178	53	231	572	2.15088e-37	8.62501e-35	ENSMUSG00000000317(Bcl6b),ENSMUSG00000000776(Polr3d),ENSMUSG00000000982(Ccl3),ENSMUSG00000001123(Lgals9),ENSMUSG00000001348(Acp5),ENSMUSG00000002897(Il17ra),ENSMUSG00000004040(Stat3),ENSMUSG00000004043(Stat5a),ENSMUSG00000004296(Il12b),ENSMUSG00000006205(Htra1),ENSMUSG00000010358(Ifi35),ENSMUSG00000016529(Il10),ENSMUSG00000017631(Abr),ENSMUSG00000017776(Crk),ENSMUSG00000017830(Dhx58),ENSMUSG00000…	ENSMUSG00000000440(Pparg),ENSMUSG00000000869(Il4),ENSMUSG00000001741(Il16),ENSMUSG00000005102(Eif2ak4),ENSMUSG00000005583(Mef2c),ENSMUSG00000005951(Shpk),ENSMUSG00000010047(Hyal2),ENSMUSG00000013707(Tnfaip8l2),ENSMUSG00000014158(Trpv4),ENSMUSG00000017697(Ada),ENSMUSG00000019768(Esr1),ENSMUSG00000020263(Appl2),ENSMUSG00000020399(Havcr2),ENSMUSG00000020889(Nr1d1),ENSMUSG00000021775(Nr1d2),ENSMUSG00…
BP	GO:0006807	nitrogen compound metabolic process	1096	1001	2097	9745	2.26341e-37	8.84936e-35	ENSMUSG00000000078(Klf6),ENSMUSG00000000184(Ccnd2),ENSMUSG00000000275(Trim25),ENSMUSG00000000317(Bcl6b),ENSMUSG00000000385(Tmprss2),ENSMUSG00000000409(Lck),ENSMUSG00000000441(Raf1),ENSMUSG00000000532(Acvr1b),ENSMUSG00000000555(Itga5),ENSMUSG00000000628(Hk2),ENSMUSG00000000730(Dnmt3l),ENSMUSG00000000732(Icosl),ENSMUSG00000000776(Polr3d),ENSMUSG00000000838(Fmr1),ENSMUSG00000000915(Hip1r),ENSMUSG000…	ENSMUSG00000000028(Cdc45),ENSMUSG00000000037(Scml2),ENSMUSG00000000149(Gna12),ENSMUSG00000000253(Gmpr),ENSMUSG00000000282(Mnt),ENSMUSG00000000326(Comt),ENSMUSG00000000440(Pparg),ENSMUSG00000000693(Loxl3),ENSMUSG00000000751(Rpa1),ENSMUSG00000000869(Il4),ENSMUSG00000000881(Dlg3),ENSMUSG00000001054(Rmnd5b),ENSMUSG00000001228(Uhrf1),ENSMUSG00000001552(Jup),ENSMUSG00000001665(Gstt3),ENSMUSG00000001755…
BP	GO:0019222	regulation of metabolic process	850	708	1558	6826	2.93396e-37	1.11913e-34	ENSMUSG00000000078(Klf6),ENSMUSG00000000184(Ccnd2),ENSMUSG00000000275(Trim25),ENSMUSG00000000317(Bcl6b),ENSMUSG00000000409(Lck),ENSMUSG00000000441(Raf1),ENSMUSG00000000532(Acvr1b),ENSMUSG00000000555(Itga5),ENSMUSG00000000628(Hk2),ENSMUSG00000000730(Dnmt3l),ENSMUSG00000000732(Icosl),ENSMUSG00000000776(Polr3d),ENSMUSG00000000838(Fmr1),ENSMUSG00000000915(Hip1r),ENSMUSG00000000957(Mmp14),ENSMUSG00000…	ENSMUSG00000000028(Cdc45),ENSMUSG00000000037(Scml2),ENSMUSG00000000149(Gna12),ENSMUSG00000000282(Mnt),ENSMUSG00000000326(Comt),ENSMUSG00000000440(Pparg),ENSMUSG00000000693(Loxl3),ENSMUSG00000000869(Il4),ENSMUSG00000000881(Dlg3),ENSMUSG00000001228(Uhrf1),ENSMUSG00000001552(Jup),ENSMUSG00000001741(Il16),ENSMUSG00000001761(Smo),ENSMUSG00000002068(Ccne1),ENSMUSG00000002083(Bbc3),ENSMUSG00000002107(Ce…
BP	GO:0098542	defense response to other organism	289	56	345	1009	3.45507e-37	1.28652e-34	ENSMUSG00000000275(Trim25),ENSMUSG00000000409(Lck),ENSMUSG00000000776(Polr3d),ENSMUSG00000000982(Ccl3),ENSMUSG00000000983(Wfdc18),ENSMUSG00000001123(Lgals9),ENSMUSG00000001348(Acp5),ENSMUSG00000002227(Mov10),ENSMUSG00000002602(Axl),ENSMUSG00000002897(Il17ra),ENSMUSG00000002983(Relb),ENSMUSG00000003283(Hck),ENSMUSG00000004043(Stat5a),ENSMUSG00000004266(Ptpn6),ENSMUSG00000004296(Il12b),ENSMUSG00000…	ENSMUSG00000000440(Pparg),ENSMUSG00000000631(Myo18a),ENSMUSG00000000869(Il4),ENSMUSG00000003882(Il7r),ENSMUSG00000005102(Eif2ak4),ENSMUSG00000010047(Hyal2),ENSMUSG00000010054(Tusc2),ENSMUSG00000013707(Tnfaip8l2),ENSMUSG00000019726(Lyst),ENSMUSG00000020263(Appl2),ENSMUSG00000020399(Havcr2),ENSMUSG00000020546(Stxbp4),ENSMUSG00000021356(Irf4),ENSMUSG00000021703(Serinc5),ENSMUSG00000022051(Bnip3l),EN…
BP	GO:0044260	cellular macromolecule metabolic process	932	854	1786	8051	6.34404e-37	2.30731e-34	ENSMUSG00000000078(Klf6),ENSMUSG00000000184(Ccnd2),ENSMUSG00000000275(Trim25),ENSMUSG00000000317(Bcl6b),ENSMUSG00000000409(Lck),ENSMUSG00000000441(Raf1),ENSMUSG00000000532(Acvr1b),ENSMUSG00000000555(Itga5),ENSMUSG00000000730(Dnmt3l),ENSMUSG00000000732(Icosl),ENSMUSG00000000776(Polr3d),ENSMUSG00000000838(Fmr1),ENSMUSG00000000915(Hip1r),ENSMUSG00000000957(Mmp14),ENSMUSG00000000982(Ccl3),ENSMUSG0000…	ENSMUSG00000000028(Cdc45),ENSMUSG00000000037(Scml2),ENSMUSG00000000149(Gna12),ENSMUSG00000000282(Mnt),ENSMUSG00000000440(Pparg),ENSMUSG00000000693(Loxl3),ENSMUSG00000000751(Rpa1),ENSMUSG00000000869(Il4),ENSMUSG00000000881(Dlg3),ENSMUSG00000001054(Rmnd5b),ENSMUSG00000001228(Uhrf1),ENSMUSG00000001552(Jup),ENSMUSG00000001761(Smo),ENSMUSG00000002068(Ccne1),ENSMUSG00000002083(Bbc3),ENSMUSG00000002109(…
BP	GO:0010604	positive regulation of macromolecule metabolic process	527	374	901	3518	1.80381e-36	6.41131e-34	ENSMUSG00000000078(Klf6),ENSMUSG00000000184(Ccnd2),ENSMUSG00000000275(Trim25),ENSMUSG00000000409(Lck),ENSMUSG00000000441(Raf1),ENSMUSG00000000532(Acvr1b),ENSMUSG00000000555(Itga5),ENSMUSG00000000730(Dnmt3l),ENSMUSG00000000732(Icosl),ENSMUSG00000000776(Polr3d),ENSMUSG00000000915(Hip1r),ENSMUSG00000000957(Mmp14),ENSMUSG00000000982(Ccl3),ENSMUSG00000001123(Lgals9),ENSMUSG00000001175(Calm1),ENSMUSG00…	ENSMUSG00000000440(Pparg),ENSMUSG00000000869(Il4),ENSMUSG00000000881(Dlg3),ENSMUSG00000001228(Uhrf1),ENSMUSG00000001552(Jup),ENSMUSG00000001741(Il16),ENSMUSG00000001761(Smo),ENSMUSG00000002083(Bbc3),ENSMUSG00000002409(Dyrk1b),ENSMUSG00000003282(Plag1),ENSMUSG00000003575(Crtc1),ENSMUSG00000003882(Il7r),ENSMUSG00000003992(Ssbp2),ENSMUSG00000004099(Dnmt1),ENSMUSG00000004151(Etv1),ENSMUSG00000005102(…
BP	GO:1902531	regulation of intracellular signal transduction	293	184	477	1572	4.02297e-36	1.39812e-33	ENSMUSG00000000275(Trim25),ENSMUSG00000000409(Lck),ENSMUSG00000000441(Raf1),ENSMUSG00000000982(Ccl3),ENSMUSG00000001098(Kctd10),ENSMUSG00000001175(Calm1),ENSMUSG00000001707(Eef1e1),ENSMUSG00000002413(Braf),ENSMUSG00000002602(Axl),ENSMUSG00000002997(Prkar2b),ENSMUSG00000003208(Yju2),ENSMUSG00000004221(Ikbkg),ENSMUSG00000004266(Ptpn6),ENSMUSG00000004446(Bid),ENSMUSG00000004936(Map2k1),ENSMUSG000000…	ENSMUSG00000000149(Gna12),ENSMUSG00000001995(Sipa1l2),ENSMUSG00000002083(Bbc3),ENSMUSG00000002731(Prkra),ENSMUSG00000003518(Dusp3),ENSMUSG00000004633(Chn2),ENSMUSG00000005150(Wdr83),ENSMUSG00000005583(Mef2c),ENSMUSG00000006235(Epor),ENSMUSG00000008305(Tle1),ENSMUSG00000010047(Hyal2),ENSMUSG00000014158(Trpv4),ENSMUSG00000014426(Map3k4),ENSMUSG00000014592(Camta1),ENSMUSG00000015766(Eps8),ENSMUSG000…
BP	GO:0032101	regulation of response to external stimulus	234	80	314	899	8.03937e-36	2.73321e-33	ENSMUSG00000000317(Bcl6b),ENSMUSG00000000776(Polr3d),ENSMUSG00000000982(Ccl3),ENSMUSG00000001123(Lgals9),ENSMUSG00000001300(Efnb2),ENSMUSG00000001348(Acp5),ENSMUSG00000002413(Braf),ENSMUSG00000002897(Il17ra),ENSMUSG00000003352(Cacnb3),ENSMUSG00000004040(Stat3),ENSMUSG00000004043(Stat5a),ENSMUSG00000004296(Il12b),ENSMUSG00000004936(Map2k1),ENSMUSG00000006205(Htra1),ENSMUSG00000007655(Cav1),ENSMUSG…	ENSMUSG00000000440(Pparg),ENSMUSG00000000869(Il4),ENSMUSG00000001227(Sema6b),ENSMUSG00000001741(Il16),ENSMUSG00000003518(Dusp3),ENSMUSG00000005102(Eif2ak4),ENSMUSG00000005951(Shpk),ENSMUSG00000010047(Hyal2),ENSMUSG00000013707(Tnfaip8l2),ENSMUSG00000014158(Trpv4),ENSMUSG00000017697(Ada),ENSMUSG00000019768(Esr1),ENSMUSG00000020263(Appl2),ENSMUSG00000020399(Havcr2),ENSMUSG00000020889(Nr1d1),ENSMUSG0…
BP	GO:0050790	regulation of catalytic activity	375	276	651	2361	2.87507e-35	9.56664e-33	ENSMUSG00000000184(Ccnd2),ENSMUSG00000000409(Lck),ENSMUSG00000000441(Raf1),ENSMUSG00000000730(Dnmt3l),ENSMUSG00000000915(Hip1r),ENSMUSG00000000982(Ccl3),ENSMUSG00000000983(Wfdc18),ENSMUSG00000001123(Lgals9),ENSMUSG00000001175(Calm1),ENSMUSG00000001632(Brpf1),ENSMUSG00000002233(Rhoc),ENSMUSG00000002307(Daxx),ENSMUSG00000002413(Braf),ENSMUSG00000002602(Axl),ENSMUSG00000002658(Gtf2f1),ENSMUSG0000000…	ENSMUSG00000000440(Pparg),ENSMUSG00000000869(Il4),ENSMUSG00000000881(Dlg3),ENSMUSG00000001995(Sipa1l2),ENSMUSG00000002068(Ccne1),ENSMUSG00000002083(Bbc3),ENSMUSG00000002289(Angptl4),ENSMUSG00000002731(Prkra),ENSMUSG00000002870(Mcm2),ENSMUSG00000003134(Tbc1d8),ENSMUSG00000003452(Bicd1),ENSMUSG00000003518(Dusp3),ENSMUSG00000004530(Coro1c),ENSMUSG00000004633(Chn2),ENSMUSG00000004698(Hdac9),ENSMUSG00…
BP	GO:0048584	positive regulation of response to stimulus	375	229	604	2151	5.42408e-35	1.76723e-32	ENSMUSG00000000275(Trim25),ENSMUSG00000000409(Lck),ENSMUSG00000000441(Raf1),ENSMUSG00000000532(Acvr1b),ENSMUSG00000000732(Icosl),ENSMUSG00000000776(Polr3d),ENSMUSG00000000915(Hip1r),ENSMUSG00000000982(Ccl3),ENSMUSG00000001123(Lgals9),ENSMUSG00000001175(Calm1),ENSMUSG00000001707(Eef1e1),ENSMUSG00000002413(Braf),ENSMUSG00000002602(Axl),ENSMUSG00000002699(Lcp2),ENSMUSG00000002897(Il17ra),ENSMUSG0000…	ENSMUSG00000000693(Loxl3),ENSMUSG00000000869(Il4),ENSMUSG00000001741(Il16),ENSMUSG00000001761(Smo),ENSMUSG00000002083(Bbc3),ENSMUSG00000002731(Prkra),ENSMUSG00000003518(Dusp3),ENSMUSG00000003882(Il7r),ENSMUSG00000005102(Eif2ak4),ENSMUSG00000005514(Por),ENSMUSG00000005583(Mef2c),ENSMUSG00000005718(Tfap4),ENSMUSG00000006235(Epor),ENSMUSG00000006611(Hfe),ENSMUSG00000006800(Sulf2),ENSMUSG00000010047(…
BP	GO:0045087	innate immune response	233	37	270	737	8.2099e-35	2.6203e-32	ENSMUSG00000000275(Trim25),ENSMUSG00000000409(Lck),ENSMUSG00000000776(Polr3d),ENSMUSG00000000982(Ccl3),ENSMUSG00000000983(Wfdc18),ENSMUSG00000001123(Lgals9),ENSMUSG00000002602(Axl),ENSMUSG00000002897(Il17ra),ENSMUSG00000002983(Relb),ENSMUSG00000003283(Hck),ENSMUSG00000004043(Stat5a),ENSMUSG00000004266(Ptpn6),ENSMUSG00000004296(Il12b),ENSMUSG00000004709(Cd244a),ENSMUSG00000006740(Kif5b),ENSMUSG000…	ENSMUSG00000000440(Pparg),ENSMUSG00000000631(Myo18a),ENSMUSG00000000869(Il4),ENSMUSG00000013707(Tnfaip8l2),ENSMUSG00000019726(Lyst),ENSMUSG00000020263(Appl2),ENSMUSG00000020399(Havcr2),ENSMUSG00000020546(Stxbp4),ENSMUSG00000021703(Serinc5),ENSMUSG00000022471(Xrcc6),ENSMUSG00000022672(Prkdc),ENSMUSG00000023973(Cnpy3),ENSMUSG00000024349(Sting1),ENSMUSG00000026187(Xrcc5),ENSMUSG00000026471(Mr1),ENSM…
BP	GO:0031325	positive regulation of cellular metabolic process	483	378	861	3367	2.45266e-34	7.67144e-32	ENSMUSG00000000078(Klf6),ENSMUSG00000000184(Ccnd2),ENSMUSG00000000275(Trim25),ENSMUSG00000000409(Lck),ENSMUSG00000000441(Raf1),ENSMUSG00000000532(Acvr1b),ENSMUSG00000000555(Itga5),ENSMUSG00000000628(Hk2),ENSMUSG00000000730(Dnmt3l),ENSMUSG00000000915(Hip1r),ENSMUSG00000000957(Mmp14),ENSMUSG00000000982(Ccl3),ENSMUSG00000001123(Lgals9),ENSMUSG00000001175(Calm1),ENSMUSG00000001288(Rarg),ENSMUSG000000…	ENSMUSG00000000326(Comt),ENSMUSG00000000440(Pparg),ENSMUSG00000000869(Il4),ENSMUSG00000000881(Dlg3),ENSMUSG00000001228(Uhrf1),ENSMUSG00000001552(Jup),ENSMUSG00000001761(Smo),ENSMUSG00000002083(Bbc3),ENSMUSG00000002409(Dyrk1b),ENSMUSG00000003282(Plag1),ENSMUSG00000003575(Crtc1),ENSMUSG00000003992(Ssbp2),ENSMUSG00000004099(Dnmt1),ENSMUSG00000004151(Etv1),ENSMUSG00000004798(Ulk2),ENSMUSG00000005102(…
BP	GO:0002684	positive regulation of immune system process	208	89	297	848	3.93998e-34	1.20818e-31	ENSMUSG00000000409(Lck),ENSMUSG00000000532(Acvr1b),ENSMUSG00000000732(Icosl),ENSMUSG00000000776(Polr3d),ENSMUSG00000000957(Mmp14),ENSMUSG00000000982(Ccl3),ENSMUSG00000001123(Lgals9),ENSMUSG00000001300(Efnb2),ENSMUSG00000002413(Braf),ENSMUSG00000002602(Axl),ENSMUSG00000002699(Lcp2),ENSMUSG00000003352(Cacnb3),ENSMUSG00000004040(Stat3),ENSMUSG00000004043(Stat5a),ENSMUSG00000004266(Ptpn6),ENSMUSG0000…	ENSMUSG00000000631(Myo18a),ENSMUSG00000000869(Il4),ENSMUSG00000003518(Dusp3),ENSMUSG00000003882(Il7r),ENSMUSG00000005102(Eif2ak4),ENSMUSG00000005583(Mef2c),ENSMUSG00000014158(Trpv4),ENSMUSG00000016933(Plcg1),ENSMUSG00000017550(Atad5),ENSMUSG00000017697(Ada),ENSMUSG00000018752(Tnfsfm13),ENSMUSG00000019966(Kitl),ENSMUSG00000020101(Vsir),ENSMUSG00000020263(Appl2),ENSMUSG00000020399(Havcr2),ENSMUSG00…
BP	GO:0006796	phosphate-containing compound metabolic process	434	369	803	3099	8.19364e-34	2.46424e-31	ENSMUSG00000000184(Ccnd2),ENSMUSG00000000409(Lck),ENSMUSG00000000441(Raf1),ENSMUSG00000000532(Acvr1b),ENSMUSG00000000555(Itga5),ENSMUSG00000000628(Hk2),ENSMUSG00000000982(Ccl3),ENSMUSG00000001123(Lgals9),ENSMUSG00000001175(Calm1),ENSMUSG00000001348(Acp5),ENSMUSG00000001630(Stk38l),ENSMUSG00000001785(Pwp1),ENSMUSG00000002103(Acp2),ENSMUSG00000002307(Daxx),ENSMUSG00000002413(Braf),ENSMUSG0000000260…	ENSMUSG00000000253(Gmpr),ENSMUSG00000000869(Il4),ENSMUSG00000000881(Dlg3),ENSMUSG00000001755(Coasy),ENSMUSG00000002068(Ccne1),ENSMUSG00000002329(Mdp1),ENSMUSG00000002409(Dyrk1b),ENSMUSG00000002731(Prkra),ENSMUSG00000003518(Dusp3),ENSMUSG00000003623(Crot),ENSMUSG00000003809(Gcdh),ENSMUSG00000004530(Coro1c),ENSMUSG00000004565(Pnpla6),ENSMUSG00000004768(Rab23),ENSMUSG00000004798(Ulk2),ENSMUSG0000000…
BP	GO:0031323	regulation of cellular metabolic process	755	657	1412	6154	1.27111e-33	3.75072e-31	ENSMUSG00000000078(Klf6),ENSMUSG00000000184(Ccnd2),ENSMUSG00000000275(Trim25),ENSMUSG00000000317(Bcl6b),ENSMUSG00000000409(Lck),ENSMUSG00000000441(Raf1),ENSMUSG00000000532(Acvr1b),ENSMUSG00000000555(Itga5),ENSMUSG00000000628(Hk2),ENSMUSG00000000730(Dnmt3l),ENSMUSG00000000838(Fmr1),ENSMUSG00000000915(Hip1r),ENSMUSG00000000957(Mmp14),ENSMUSG00000000982(Ccl3),ENSMUSG00000000983(Wfdc18),ENSMUSG000000…	ENSMUSG00000000028(Cdc45),ENSMUSG00000000037(Scml2),ENSMUSG00000000149(Gna12),ENSMUSG00000000282(Mnt),ENSMUSG00000000326(Comt),ENSMUSG00000000440(Pparg),ENSMUSG00000000693(Loxl3),ENSMUSG00000000869(Il4),ENSMUSG00000000881(Dlg3),ENSMUSG00000001228(Uhrf1),ENSMUSG00000001552(Jup),ENSMUSG00000001761(Smo),ENSMUSG00000002068(Ccne1),ENSMUSG00000002083(Bbc3),ENSMUSG00000002107(Celf2),ENSMUSG00000002409(D…
BP	GO:0044093	positive regulation of molecular function	290	201	491	1667	1.33725e-33	3.87281e-31	ENSMUSG00000000184(Ccnd2),ENSMUSG00000000275(Trim25),ENSMUSG00000000409(Lck),ENSMUSG00000000441(Raf1),ENSMUSG00000000915(Hip1r),ENSMUSG00000000982(Ccl3),ENSMUSG00000001123(Lgals9),ENSMUSG00000001175(Calm1),ENSMUSG00000001627(Ifrd1),ENSMUSG00000002233(Rhoc),ENSMUSG00000002307(Daxx),ENSMUSG00000002413(Braf),ENSMUSG00000002602(Axl),ENSMUSG00000002699(Lcp2),ENSMUSG00000003352(Cacnb3),ENSMUSG000000039…	ENSMUSG00000000440(Pparg),ENSMUSG00000000869(Il4),ENSMUSG00000000881(Dlg3),ENSMUSG00000001552(Jup),ENSMUSG00000001761(Smo),ENSMUSG00000001995(Sipa1l2),ENSMUSG00000002083(Bbc3),ENSMUSG00000003134(Tbc1d8),ENSMUSG00000003575(Crtc1),ENSMUSG00000004530(Coro1c),ENSMUSG00000004633(Chn2),ENSMUSG00000005370(Msh6),ENSMUSG00000005514(Por),ENSMUSG00000005583(Mef2c),ENSMUSG00000005718(Tfap4),ENSMUSG0000000595…
BP	GO:0006793	phosphorus metabolic process	435	371	806	3121	2.04735e-33	5.82156e-31	ENSMUSG00000000184(Ccnd2),ENSMUSG00000000409(Lck),ENSMUSG00000000441(Raf1),ENSMUSG00000000532(Acvr1b),ENSMUSG00000000555(Itga5),ENSMUSG00000000628(Hk2),ENSMUSG00000000982(Ccl3),ENSMUSG00000001123(Lgals9),ENSMUSG00000001175(Calm1),ENSMUSG00000001348(Acp5),ENSMUSG00000001630(Stk38l),ENSMUSG00000001785(Pwp1),ENSMUSG00000002103(Acp2),ENSMUSG00000002307(Daxx),ENSMUSG00000002413(Braf),ENSMUSG0000000260…	ENSMUSG00000000253(Gmpr),ENSMUSG00000000869(Il4),ENSMUSG00000000881(Dlg3),ENSMUSG00000001755(Coasy),ENSMUSG00000002068(Ccne1),ENSMUSG00000002329(Mdp1),ENSMUSG00000002409(Dyrk1b),ENSMUSG00000002731(Prkra),ENSMUSG00000003518(Dusp3),ENSMUSG00000003623(Crot),ENSMUSG00000003809(Gcdh),ENSMUSG00000004530(Coro1c),ENSMUSG00000004565(Pnpla6),ENSMUSG00000004768(Rab23),ENSMUSG00000004798(Ulk2),ENSMUSG0000000…
BP	GO:0043170	macromolecule metabolic process	1088	931	2019	9430	3.45421e-33	9.64651e-31	ENSMUSG00000000078(Klf6),ENSMUSG00000000184(Ccnd2),ENSMUSG00000000275(Trim25),ENSMUSG00000000317(Bcl6b),ENSMUSG00000000385(Tmprss2),ENSMUSG00000000409(Lck),ENSMUSG00000000441(Raf1),ENSMUSG00000000532(Acvr1b),ENSMUSG00000000555(Itga5),ENSMUSG00000000730(Dnmt3l),ENSMUSG00000000732(Icosl),ENSMUSG00000000776(Polr3d),ENSMUSG00000000838(Fmr1),ENSMUSG00000000915(Hip1r),ENSMUSG00000000957(Mmp14),ENSMUSG0…	ENSMUSG00000000028(Cdc45),ENSMUSG00000000037(Scml2),ENSMUSG00000000149(Gna12),ENSMUSG00000000282(Mnt),ENSMUSG00000000440(Pparg),ENSMUSG00000000693(Loxl3),ENSMUSG00000000751(Rpa1),ENSMUSG00000000869(Il4),ENSMUSG00000000881(Dlg3),ENSMUSG00000001054(Rmnd5b),ENSMUSG00000001228(Uhrf1),ENSMUSG00000001552(Jup),ENSMUSG00000001741(Il16),ENSMUSG00000001761(Smo),ENSMUSG00000001865(Cpa3),ENSMUSG00000002068(C…
BP	GO:0051239	regulation of multicellular organismal process	476	347	823	3213	7.03515e-33	1.93022e-30	ENSMUSG00000000317(Bcl6b),ENSMUSG00000000409(Lck),ENSMUSG00000000532(Acvr1b),ENSMUSG00000000555(Itga5),ENSMUSG00000000628(Hk2),ENSMUSG00000000732(Icosl),ENSMUSG00000000776(Polr3d),ENSMUSG00000000915(Hip1r),ENSMUSG00000000957(Mmp14),ENSMUSG00000000982(Ccl3),ENSMUSG00000001052(Sec24b),ENSMUSG00000001123(Lgals9),ENSMUSG00000001175(Calm1),ENSMUSG00000001288(Rarg),ENSMUSG00000001300(Efnb2),ENSMUSG0000…	ENSMUSG00000000326(Comt),ENSMUSG00000000440(Pparg),ENSMUSG00000000693(Loxl3),ENSMUSG00000000869(Il4),ENSMUSG00000001227(Sema6b),ENSMUSG00000001482(Def8),ENSMUSG00000001552(Jup),ENSMUSG00000001741(Il16),ENSMUSG00000001761(Smo),ENSMUSG00000002274(Metrn),ENSMUSG00000003282(Plag1),ENSMUSG00000003575(Crtc1),ENSMUSG00000003882(Il7r),ENSMUSG00000004099(Dnmt1),ENSMUSG00000004530(Coro1c),ENSMUSG0000000469…
BP	GO:0002252	immune effector process	194	66	260	718	1.38638e-32	3.7382e-30	ENSMUSG00000000275(Trim25),ENSMUSG00000000732(Icosl),ENSMUSG00000000776(Polr3d),ENSMUSG00000000982(Ccl3),ENSMUSG00000001123(Lgals9),ENSMUSG00000002227(Mov10),ENSMUSG00000002983(Relb),ENSMUSG00000004040(Stat3),ENSMUSG00000004043(Stat5a),ENSMUSG00000004266(Ptpn6),ENSMUSG00000004296(Il12b),ENSMUSG00000004709(Cd244a),ENSMUSG00000005413(Hmox1),ENSMUSG00000006205(Htra1),ENSMUSG00000010358(Ifi35),ENSMUS…	ENSMUSG00000000631(Myo18a),ENSMUSG00000000693(Loxl3),ENSMUSG00000000869(Il4),ENSMUSG00000003882(Il7r),ENSMUSG00000005102(Eif2ak4),ENSMUSG00000005370(Msh6),ENSMUSG00000006611(Hfe),ENSMUSG00000010047(Hyal2),ENSMUSG00000010054(Tusc2),ENSMUSG00000017550(Atad5),ENSMUSG00000017697(Ada),ENSMUSG00000018752(Tnfsfm13),ENSMUSG00000019726(Lyst),ENSMUSG00000020101(Vsir),ENSMUSG00000020263(Appl2),ENSMUSG000000…
BP	GO:0006464	cellular protein modification process	529	422	951	3844	1.81088e-32	4.72007e-30	ENSMUSG00000000184(Ccnd2),ENSMUSG00000000275(Trim25),ENSMUSG00000000409(Lck),ENSMUSG00000000441(Raf1),ENSMUSG00000000532(Acvr1b),ENSMUSG00000000555(Itga5),ENSMUSG00000000982(Ccl3),ENSMUSG00000001098(Kctd10),ENSMUSG00000001123(Lgals9),ENSMUSG00000001175(Calm1),ENSMUSG00000001630(Stk38l),ENSMUSG00000001632(Brpf1),ENSMUSG00000001785(Pwp1),ENSMUSG00000002103(Acp2),ENSMUSG00000002111(Spi1),ENSMUSG0000…	ENSMUSG00000000037(Scml2),ENSMUSG00000000693(Loxl3),ENSMUSG00000000869(Il4),ENSMUSG00000000881(Dlg3),ENSMUSG00000001054(Rmnd5b),ENSMUSG00000001228(Uhrf1),ENSMUSG00000002068(Ccne1),ENSMUSG00000002109(Ddb2),ENSMUSG00000002329(Mdp1),ENSMUSG00000002409(Dyrk1b),ENSMUSG00000002731(Prkra),ENSMUSG00000002732(Fkbp7),ENSMUSG00000003518(Dusp3),ENSMUSG00000004099(Dnmt1),ENSMUSG00000004530(Coro1c),ENSMUSG0000…
BP	GO:0036211	protein modification process	529	422	951	3844	1.81088e-32	4.72007e-30	ENSMUSG00000000184(Ccnd2),ENSMUSG00000000275(Trim25),ENSMUSG00000000409(Lck),ENSMUSG00000000441(Raf1),ENSMUSG00000000532(Acvr1b),ENSMUSG00000000555(Itga5),ENSMUSG00000000982(Ccl3),ENSMUSG00000001098(Kctd10),ENSMUSG00000001123(Lgals9),ENSMUSG00000001175(Calm1),ENSMUSG00000001630(Stk38l),ENSMUSG00000001632(Brpf1),ENSMUSG00000001785(Pwp1),ENSMUSG00000002103(Acp2),ENSMUSG00000002111(Spi1),ENSMUSG0000…	ENSMUSG00000000037(Scml2),ENSMUSG00000000693(Loxl3),ENSMUSG00000000869(Il4),ENSMUSG00000000881(Dlg3),ENSMUSG00000001054(Rmnd5b),ENSMUSG00000001228(Uhrf1),ENSMUSG00000002068(Ccne1),ENSMUSG00000002109(Ddb2),ENSMUSG00000002329(Mdp1),ENSMUSG00000002409(Dyrk1b),ENSMUSG00000002731(Prkra),ENSMUSG00000002732(Fkbp7),ENSMUSG00000003518(Dusp3),ENSMUSG00000004099(Dnmt1),ENSMUSG00000004530(Coro1c),ENSMUSG0000…
BP	GO:0001817	regulation of cytokine production	188	65	253	693	2.28022e-32	5.84597e-30	ENSMUSG00000000317(Bcl6b),ENSMUSG00000000732(Icosl),ENSMUSG00000000776(Polr3d),ENSMUSG00000000982(Ccl3),ENSMUSG00000001123(Lgals9),ENSMUSG00000001348(Acp5),ENSMUSG00000002602(Axl),ENSMUSG00000002897(Il17ra),ENSMUSG00000002983(Relb),ENSMUSG00000004040(Stat3),ENSMUSG00000004043(Stat5a),ENSMUSG00000004266(Ptpn6),ENSMUSG00000004296(Il12b),ENSMUSG00000004709(Cd244a),ENSMUSG00000005413(Hmox1),ENSMUSG00…	ENSMUSG00000000869(Il4),ENSMUSG00000001741(Il16),ENSMUSG00000004698(Hdac9),ENSMUSG00000006611(Hfe),ENSMUSG00000006678(Pola1),ENSMUSG00000006800(Sulf2),ENSMUSG00000010047(Hyal2),ENSMUSG00000010054(Tusc2),ENSMUSG00000014158(Trpv4),ENSMUSG00000014361(Mertk),ENSMUSG00000017146(Brca1),ENSMUSG00000020101(Vsir),ENSMUSG00000020263(Appl2),ENSMUSG00000020399(Havcr2),ENSMUSG00000021253(Tgfb3),ENSMUSG0000002…
BP	GO:0001816	cytokine production	191	68	259	718	3.77623e-32	9.52524e-30	ENSMUSG00000000317(Bcl6b),ENSMUSG00000000732(Icosl),ENSMUSG00000000776(Polr3d),ENSMUSG00000000982(Ccl3),ENSMUSG00000001123(Lgals9),ENSMUSG00000001348(Acp5),ENSMUSG00000002602(Axl),ENSMUSG00000002897(Il17ra),ENSMUSG00000002983(Relb),ENSMUSG00000004040(Stat3),ENSMUSG00000004043(Stat5a),ENSMUSG00000004266(Ptpn6),ENSMUSG00000004296(Il12b),ENSMUSG00000004709(Cd244a),ENSMUSG00000005413(Hmox1),ENSMUSG00…	ENSMUSG00000000869(Il4),ENSMUSG00000001741(Il16),ENSMUSG00000004698(Hdac9),ENSMUSG00000006611(Hfe),ENSMUSG00000006678(Pola1),ENSMUSG00000006800(Sulf2),ENSMUSG00000010047(Hyal2),ENSMUSG00000010054(Tusc2),ENSMUSG00000014158(Trpv4),ENSMUSG00000014361(Mertk),ENSMUSG00000017146(Brca1),ENSMUSG00000020101(Vsir),ENSMUSG00000020263(Appl2),ENSMUSG00000020399(Havcr2),ENSMUSG00000021253(Tgfb3),ENSMUSG0000002…
BP	GO:0080134	regulation of response to stress	269	133	402	1305	7.66348e-32	1.90237e-29	ENSMUSG00000000317(Bcl6b),ENSMUSG00000000776(Polr3d),ENSMUSG00000000982(Ccl3),ENSMUSG00000001123(Lgals9),ENSMUSG00000001348(Acp5),ENSMUSG00000001707(Eef1e1),ENSMUSG00000002413(Braf),ENSMUSG00000002897(Il17ra),ENSMUSG00000003208(Yju2),ENSMUSG00000003541(Ier3),ENSMUSG00000004040(Stat3),ENSMUSG00000004043(Stat5a),ENSMUSG00000004221(Ikbkg),ENSMUSG00000004296(Il12b),ENSMUSG00000004446(Bid),ENSMUSG0000…	ENSMUSG00000000440(Pparg),ENSMUSG00000000869(Il4),ENSMUSG00000001741(Il16),ENSMUSG00000003518(Dusp3),ENSMUSG00000005102(Eif2ak4),ENSMUSG00000005583(Mef2c),ENSMUSG00000005951(Shpk),ENSMUSG00000006235(Epor),ENSMUSG00000010047(Hyal2),ENSMUSG00000010461(Eya4),ENSMUSG00000013707(Tnfaip8l2),ENSMUSG00000014158(Trpv4),ENSMUSG00000014426(Map3k4),ENSMUSG00000014905(Dnajb9),ENSMUSG00000016984(Etaa1),ENSMUSG…
BP	GO:1901564	organonitrogen compound metabolic process	798	657	1455	6439	2.36023e-31	5.76746e-29	ENSMUSG00000000184(Ccnd2),ENSMUSG00000000275(Trim25),ENSMUSG00000000385(Tmprss2),ENSMUSG00000000409(Lck),ENSMUSG00000000441(Raf1),ENSMUSG00000000532(Acvr1b),ENSMUSG00000000555(Itga5),ENSMUSG00000000628(Hk2),ENSMUSG00000000838(Fmr1),ENSMUSG00000000915(Hip1r),ENSMUSG00000000957(Mmp14),ENSMUSG00000000982(Ccl3),ENSMUSG00000000983(Wfdc18),ENSMUSG00000001098(Kctd10),ENSMUSG00000001123(Lgals9),ENSMUSG00…	ENSMUSG00000000037(Scml2),ENSMUSG00000000149(Gna12),ENSMUSG00000000253(Gmpr),ENSMUSG00000000326(Comt),ENSMUSG00000000440(Pparg),ENSMUSG00000000693(Loxl3),ENSMUSG00000000869(Il4),ENSMUSG00000000881(Dlg3),ENSMUSG00000001054(Rmnd5b),ENSMUSG00000001228(Uhrf1),ENSMUSG00000001665(Gstt3),ENSMUSG00000001755(Coasy),ENSMUSG00000001865(Cpa3),ENSMUSG00000002068(Ccne1),ENSMUSG00000002083(Bbc3),ENSMUSG00000002…
BP	GO:0051173	positive regulation of nitrogen compound metabolic process	454	353	807	3167	2.46857e-31	5.93938e-29	ENSMUSG00000000078(Klf6),ENSMUSG00000000184(Ccnd2),ENSMUSG00000000275(Trim25),ENSMUSG00000000409(Lck),ENSMUSG00000000441(Raf1),ENSMUSG00000000532(Acvr1b),ENSMUSG00000000555(Itga5),ENSMUSG00000000730(Dnmt3l),ENSMUSG00000000915(Hip1r),ENSMUSG00000000957(Mmp14),ENSMUSG00000000982(Ccl3),ENSMUSG00000001123(Lgals9),ENSMUSG00000001175(Calm1),ENSMUSG00000001288(Rarg),ENSMUSG00000001416(Cct3),ENSMUSG00000…	ENSMUSG00000000326(Comt),ENSMUSG00000000440(Pparg),ENSMUSG00000000869(Il4),ENSMUSG00000000881(Dlg3),ENSMUSG00000001228(Uhrf1),ENSMUSG00000001552(Jup),ENSMUSG00000001761(Smo),ENSMUSG00000002083(Bbc3),ENSMUSG00000002409(Dyrk1b),ENSMUSG00000003282(Plag1),ENSMUSG00000003575(Crtc1),ENSMUSG00000003992(Ssbp2),ENSMUSG00000004099(Dnmt1),ENSMUSG00000004151(Etv1),ENSMUSG00000005102(Eif2ak4),ENSMUSG000000051…
BP	GO:0043412	macromolecule modification	544	437	981	4023	4.45053e-31	1.05457e-28	ENSMUSG00000000184(Ccnd2),ENSMUSG00000000275(Trim25),ENSMUSG00000000409(Lck),ENSMUSG00000000441(Raf1),ENSMUSG00000000532(Acvr1b),ENSMUSG00000000555(Itga5),ENSMUSG00000000730(Dnmt3l),ENSMUSG00000000982(Ccl3),ENSMUSG00000001056(Nhp2),ENSMUSG00000001098(Kctd10),ENSMUSG00000001123(Lgals9),ENSMUSG00000001175(Calm1),ENSMUSG00000001630(Stk38l),ENSMUSG00000001632(Brpf1),ENSMUSG00000001663(Gstt1),ENSMUSG0…	ENSMUSG00000000037(Scml2),ENSMUSG00000000693(Loxl3),ENSMUSG00000000869(Il4),ENSMUSG00000000881(Dlg3),ENSMUSG00000001054(Rmnd5b),ENSMUSG00000001228(Uhrf1),ENSMUSG00000002068(Ccne1),ENSMUSG00000002109(Ddb2),ENSMUSG00000002329(Mdp1),ENSMUSG00000002409(Dyrk1b),ENSMUSG00000002731(Prkra),ENSMUSG00000002732(Fkbp7),ENSMUSG00000003518(Dusp3),ENSMUSG00000004099(Dnmt1),ENSMUSG00000004530(Coro1c),ENSMUSG0000…
BP	GO:0060255	regulation of macromolecule metabolic process	798	639	1437	6357	6.76285e-31	1.57857e-28	ENSMUSG00000000078(Klf6),ENSMUSG00000000184(Ccnd2),ENSMUSG00000000275(Trim25),ENSMUSG00000000317(Bcl6b),ENSMUSG00000000409(Lck),ENSMUSG00000000441(Raf1),ENSMUSG00000000532(Acvr1b),ENSMUSG00000000555(Itga5),ENSMUSG00000000730(Dnmt3l),ENSMUSG00000000732(Icosl),ENSMUSG00000000776(Polr3d),ENSMUSG00000000838(Fmr1),ENSMUSG00000000915(Hip1r),ENSMUSG00000000957(Mmp14),ENSMUSG00000000982(Ccl3),ENSMUSG0000…	ENSMUSG00000000028(Cdc45),ENSMUSG00000000037(Scml2),ENSMUSG00000000149(Gna12),ENSMUSG00000000282(Mnt),ENSMUSG00000000440(Pparg),ENSMUSG00000000693(Loxl3),ENSMUSG00000000869(Il4),ENSMUSG00000000881(Dlg3),ENSMUSG00000001228(Uhrf1),ENSMUSG00000001552(Jup),ENSMUSG00000001741(Il16),ENSMUSG00000001761(Smo),ENSMUSG00000002068(Ccne1),ENSMUSG00000002083(Bbc3),ENSMUSG00000002107(Celf2),ENSMUSG00000002409(D…
BP	GO:0006954	inflammatory response	185	67	252	704	1.08119e-30	2.48658e-28	ENSMUSG00000000317(Bcl6b),ENSMUSG00000000982(Ccl3),ENSMUSG00000001123(Lgals9),ENSMUSG00000001348(Acp5),ENSMUSG00000002602(Axl),ENSMUSG00000002897(Il17ra),ENSMUSG00000002983(Relb),ENSMUSG00000003283(Hck),ENSMUSG00000004040(Stat3),ENSMUSG00000004043(Stat5a),ENSMUSG00000004296(Il12b),ENSMUSG00000005413(Hmox1),ENSMUSG00000010358(Ifi35),ENSMUSG00000014599(Csf1),ENSMUSG00000015316(Slamf1),ENSMUSG000000…	ENSMUSG00000000318(Clec10a),ENSMUSG00000000440(Pparg),ENSMUSG00000000693(Loxl3),ENSMUSG00000000869(Il4),ENSMUSG00000001741(Il16),ENSMUSG00000001761(Smo),ENSMUSG00000005150(Wdr83),ENSMUSG00000005951(Shpk),ENSMUSG00000006611(Hfe),ENSMUSG00000008845(Cd163),ENSMUSG00000010047(Hyal2),ENSMUSG00000010051(Hyal1),ENSMUSG00000010054(Tusc2),ENSMUSG00000013707(Tnfaip8l2),ENSMUSG00000014158(Trpv4),ENSMUSG0000…
BP	GO:0002520	immune system development	198	127	325	1000	2.476e-30	5.61191e-28	ENSMUSG00000000409(Lck),ENSMUSG00000000441(Raf1),ENSMUSG00000000532(Acvr1b),ENSMUSG00000000732(Icosl),ENSMUSG00000000957(Mmp14),ENSMUSG00000000982(Ccl3),ENSMUSG00000001123(Lgals9),ENSMUSG00000001288(Rarg),ENSMUSG00000002111(Spi1),ENSMUSG00000002413(Braf),ENSMUSG00000002602(Axl),ENSMUSG00000002983(Relb),ENSMUSG00000003070(Efna2),ENSMUSG00000004040(Stat3),ENSMUSG00000004043(Stat5a),ENSMUSG000000042…	ENSMUSG00000000440(Pparg),ENSMUSG00000000693(Loxl3),ENSMUSG00000000751(Rpa1),ENSMUSG00000000869(Il4),ENSMUSG00000003812(Dnase2a),ENSMUSG00000003882(Il7r),ENSMUSG00000005370(Msh6),ENSMUSG00000005583(Mef2c),ENSMUSG00000005958(Ephb3),ENSMUSG00000006362(Cbfa2t3),ENSMUSG00000010047(Hyal2),ENSMUSG00000010054(Tusc2),ENSMUSG00000014361(Mertk),ENSMUSG00000014905(Dnajb9),ENSMUSG00000016087(Fli1),ENSMUSG000…
MF	GO:0043167	ion binding	680	711	1391	6127	3.27675e-30	7.25584e-28	ENSMUSG00000000275(Trim25),ENSMUSG00000000317(Bcl6b),ENSMUSG00000000409(Lck),ENSMUSG00000000441(Raf1),ENSMUSG00000000532(Acvr1b),ENSMUSG00000000555(Itga5),ENSMUSG00000000628(Hk2),ENSMUSG00000000730(Dnmt3l),ENSMUSG00000000915(Hip1r),ENSMUSG00000000957(Mmp14),ENSMUSG00000001052(Sec24b),ENSMUSG00000001175(Calm1),ENSMUSG00000001288(Rarg),ENSMUSG00000001348(Acp5),ENSMUSG00000001416(Cct3),ENSMUSG000000…	ENSMUSG00000000149(Gna12),ENSMUSG00000000253(Gmpr),ENSMUSG00000000326(Comt),ENSMUSG00000000440(Pparg),ENSMUSG00000000631(Myo18a),ENSMUSG00000000693(Loxl3),ENSMUSG00000000751(Rpa1),ENSMUSG00000001054(Rmnd5b),ENSMUSG00000001143(Lman2l),ENSMUSG00000001228(Uhrf1),ENSMUSG00000001482(Def8),ENSMUSG00000001755(Coasy),ENSMUSG00000001865(Cpa3),ENSMUSG00000002104(Rapsn),ENSMUSG00000002329(Mdp1),ENSMUSG00000…
CC	GO:0005634	nucleus	827	764	1591	7197	3.2941e-30	7.25584e-28	ENSMUSG00000000078(Klf6),ENSMUSG00000000184(Ccnd2),ENSMUSG00000000275(Trim25),ENSMUSG00000000317(Bcl6b),ENSMUSG00000000441(Raf1),ENSMUSG00000000730(Dnmt3l),ENSMUSG00000000776(Polr3d),ENSMUSG00000000838(Fmr1),ENSMUSG00000000957(Mmp14),ENSMUSG00000001056(Nhp2),ENSMUSG00000001098(Kctd10),ENSMUSG00000001123(Lgals9),ENSMUSG00000001175(Calm1),ENSMUSG00000001288(Rarg),ENSMUSG00000001440(Kpnb1),ENSMUSG00…	ENSMUSG00000000028(Cdc45),ENSMUSG00000000037(Scml2),ENSMUSG00000000056(Narf),ENSMUSG00000000282(Mnt),ENSMUSG00000000440(Pparg),ENSMUSG00000000693(Loxl3),ENSMUSG00000000751(Rpa1),ENSMUSG00000000823(Zfp512b),ENSMUSG00000001054(Rmnd5b),ENSMUSG00000001228(Uhrf1),ENSMUSG00000001552(Jup),ENSMUSG00000001741(Il16),ENSMUSG00000001761(Smo),ENSMUSG00000002068(Ccne1),ENSMUSG00000002107(Celf2),ENSMUSG00000002…
BP	GO:0045321	leukocyte activation	187	101	288	851	3.4524e-30	7.4989e-28	ENSMUSG00000000409(Lck),ENSMUSG00000000732(Icosl),ENSMUSG00000000957(Mmp14),ENSMUSG00000000982(Ccl3),ENSMUSG00000001123(Lgals9),ENSMUSG00000001300(Efnb2),ENSMUSG00000002111(Spi1),ENSMUSG00000002413(Braf),ENSMUSG00000002602(Axl),ENSMUSG00000002699(Lcp2),ENSMUSG00000002983(Relb),ENSMUSG00000003206(Ebi3),ENSMUSG00000004040(Stat3),ENSMUSG00000004043(Stat5a),ENSMUSG00000004266(Ptpn6),ENSMUSG0000000429…	ENSMUSG00000000631(Myo18a),ENSMUSG00000000693(Loxl3),ENSMUSG00000000869(Il4),ENSMUSG00000003518(Dusp3),ENSMUSG00000003882(Il7r),ENSMUSG00000005102(Eif2ak4),ENSMUSG00000005370(Msh6),ENSMUSG00000005583(Mef2c),ENSMUSG00000005951(Shpk),ENSMUSG00000006611(Hfe),ENSMUSG00000010047(Hyal2),ENSMUSG00000010054(Tusc2),ENSMUSG00000013707(Tnfaip8l2),ENSMUSG00000014361(Mertk),ENSMUSG00000014905(Dnajb9),ENSMUSG0…
BP	GO:0044267	cellular protein metabolic process	655	506	1161	4955	5.98111e-30	1.28135e-27	ENSMUSG00000000184(Ccnd2),ENSMUSG00000000275(Trim25),ENSMUSG00000000409(Lck),ENSMUSG00000000441(Raf1),ENSMUSG00000000532(Acvr1b),ENSMUSG00000000555(Itga5),ENSMUSG00000000838(Fmr1),ENSMUSG00000000915(Hip1r),ENSMUSG00000000957(Mmp14),ENSMUSG00000000982(Ccl3),ENSMUSG00000000983(Wfdc18),ENSMUSG00000001098(Kctd10),ENSMUSG00000001123(Lgals9),ENSMUSG00000001175(Calm1),ENSMUSG00000001630(Stk38l),ENSMUSG0…	ENSMUSG00000000037(Scml2),ENSMUSG00000000149(Gna12),ENSMUSG00000000440(Pparg),ENSMUSG00000000693(Loxl3),ENSMUSG00000000869(Il4),ENSMUSG00000000881(Dlg3),ENSMUSG00000001054(Rmnd5b),ENSMUSG00000001228(Uhrf1),ENSMUSG00000002068(Ccne1),ENSMUSG00000002083(Bbc3),ENSMUSG00000002109(Ddb2),ENSMUSG00000002329(Mdp1),ENSMUSG00000002409(Dyrk1b),ENSMUSG00000002731(Prkra),ENSMUSG00000002732(Fkbp7),ENSMUSG000000…
BP	GO:0048585	negative regulation of response to stimulus	265	199	464	1602	7.81489e-30	1.65158e-27	ENSMUSG00000000441(Raf1),ENSMUSG00000000957(Mmp14),ENSMUSG00000001098(Kctd10),ENSMUSG00000001123(Lgals9),ENSMUSG00000001175(Calm1),ENSMUSG00000001348(Acp5),ENSMUSG00000003208(Yju2),ENSMUSG00000003352(Cacnb3),ENSMUSG00000004221(Ikbkg),ENSMUSG00000004266(Ptpn6),ENSMUSG00000004296(Il12b),ENSMUSG00000004446(Bid),ENSMUSG00000004936(Map2k1),ENSMUSG00000004952(Rasa4),ENSMUSG00000005087(Cd44),ENSMUSG0000…	ENSMUSG00000000282(Mnt),ENSMUSG00000000440(Pparg),ENSMUSG00000000693(Loxl3),ENSMUSG00000000869(Il4),ENSMUSG00000001227(Sema6b),ENSMUSG00000003452(Bicd1),ENSMUSG00000003518(Dusp3),ENSMUSG00000003882(Il7r),ENSMUSG00000004347(Pde1c),ENSMUSG00000006235(Epor),ENSMUSG00000006611(Hfe),ENSMUSG00000006800(Sulf2),ENSMUSG00000008305(Tle1),ENSMUSG00000010047(Hyal2),ENSMUSG00000010461(Eya4),ENSMUSG00000010751…
BP	GO:0080090	regulation of primary metabolic process	731	627	1358	5975	9.21798e-30	1.92213e-27	ENSMUSG00000000078(Klf6),ENSMUSG00000000184(Ccnd2),ENSMUSG00000000275(Trim25),ENSMUSG00000000317(Bcl6b),ENSMUSG00000000409(Lck),ENSMUSG00000000441(Raf1),ENSMUSG00000000532(Acvr1b),ENSMUSG00000000555(Itga5),ENSMUSG00000000730(Dnmt3l),ENSMUSG00000000838(Fmr1),ENSMUSG00000000915(Hip1r),ENSMUSG00000000957(Mmp14),ENSMUSG00000000982(Ccl3),ENSMUSG00000000983(Wfdc18),ENSMUSG00000001123(Lgals9),ENSMUSG000…	ENSMUSG00000000028(Cdc45),ENSMUSG00000000037(Scml2),ENSMUSG00000000149(Gna12),ENSMUSG00000000282(Mnt),ENSMUSG00000000326(Comt),ENSMUSG00000000440(Pparg),ENSMUSG00000000693(Loxl3),ENSMUSG00000000869(Il4),ENSMUSG00000000881(Dlg3),ENSMUSG00000001228(Uhrf1),ENSMUSG00000001552(Jup),ENSMUSG00000001761(Smo),ENSMUSG00000002068(Ccne1),ENSMUSG00000002083(Bbc3),ENSMUSG00000002107(Celf2),ENSMUSG00000002289(A…
BP	GO:0007166	cell surface receptor signaling pathway	395	270	665	2526	1.49195e-29	3.07009e-27	ENSMUSG00000000409(Lck),ENSMUSG00000000441(Raf1),ENSMUSG00000000532(Acvr1b),ENSMUSG00000000555(Itga5),ENSMUSG00000000732(Icosl),ENSMUSG00000000915(Hip1r),ENSMUSG00000000957(Mmp14),ENSMUSG00000000982(Ccl3),ENSMUSG00000001098(Kctd10),ENSMUSG00000001123(Lgals9),ENSMUSG00000001300(Efnb2),ENSMUSG00000001785(Pwp1),ENSMUSG00000002111(Spi1),ENSMUSG00000002413(Braf),ENSMUSG00000002602(Axl),ENSMUSG00000002…	ENSMUSG00000000440(Pparg),ENSMUSG00000000693(Loxl3),ENSMUSG00000000869(Il4),ENSMUSG00000001227(Sema6b),ENSMUSG00000001761(Smo),ENSMUSG00000002031(Ift46),ENSMUSG00000002068(Ccne1),ENSMUSG00000003378(Grik5),ENSMUSG00000003518(Dusp3),ENSMUSG00000003882(Il7r),ENSMUSG00000004071(Cdip1),ENSMUSG00000005514(Por),ENSMUSG00000005583(Mef2c),ENSMUSG00000005958(Ephb3),ENSMUSG00000006235(Epor),ENSMUSG000000066…
MF	GO:0003824	catalytic activity	636	682	1318	5775	3.51896e-29	7.14715e-27	ENSMUSG00000000275(Trim25),ENSMUSG00000000385(Tmprss2),ENSMUSG00000000409(Lck),ENSMUSG00000000441(Raf1),ENSMUSG00000000532(Acvr1b),ENSMUSG00000000628(Hk2),ENSMUSG00000000730(Dnmt3l),ENSMUSG00000000776(Polr3d),ENSMUSG00000000957(Mmp14),ENSMUSG00000000982(Ccl3),ENSMUSG00000001098(Kctd10),ENSMUSG00000001348(Acp5),ENSMUSG00000001467(Cyp51),ENSMUSG00000001473(Tubb6),ENSMUSG00000001630(Stk38l),ENSMUSG0…	ENSMUSG00000000149(Gna12),ENSMUSG00000000253(Gmpr),ENSMUSG00000000326(Comt),ENSMUSG00000000631(Myo18a),ENSMUSG00000000686(Abhd15),ENSMUSG00000000693(Loxl3),ENSMUSG00000001054(Rmnd5b),ENSMUSG00000001228(Uhrf1),ENSMUSG00000001665(Gstt3),ENSMUSG00000001751(Naglu),ENSMUSG00000001755(Coasy),ENSMUSG00000001865(Cpa3),ENSMUSG00000001942(Siae),ENSMUSG00000002068(Ccne1),ENSMUSG00000002109(Ddb2),ENSMUSG0000…
BP	GO:0001775	cell activation	203	110	313	966	5.84826e-29	1.17258e-26	ENSMUSG00000000409(Lck),ENSMUSG00000000732(Icosl),ENSMUSG00000000957(Mmp14),ENSMUSG00000000982(Ccl3),ENSMUSG00000001123(Lgals9),ENSMUSG00000001300(Efnb2),ENSMUSG00000002111(Spi1),ENSMUSG00000002413(Braf),ENSMUSG00000002602(Axl),ENSMUSG00000002699(Lcp2),ENSMUSG00000002897(Il17ra),ENSMUSG00000002983(Relb),ENSMUSG00000003206(Ebi3),ENSMUSG00000004040(Stat3),ENSMUSG00000004043(Stat5a),ENSMUSG000000042…	ENSMUSG00000000631(Myo18a),ENSMUSG00000000693(Loxl3),ENSMUSG00000000869(Il4),ENSMUSG00000001761(Smo),ENSMUSG00000003518(Dusp3),ENSMUSG00000003882(Il7r),ENSMUSG00000005102(Eif2ak4),ENSMUSG00000005370(Msh6),ENSMUSG00000005583(Mef2c),ENSMUSG00000005951(Shpk),ENSMUSG00000006611(Hfe),ENSMUSG00000010047(Hyal2),ENSMUSG00000010054(Tusc2),ENSMUSG00000013707(Tnfaip8l2),ENSMUSG00000014361(Mertk),ENSMUSG0000…
BP	GO:0051171	regulation of nitrogen compound metabolic process	719	603	1322	5810	6.04683e-29	1.19704e-26	ENSMUSG00000000078(Klf6),ENSMUSG00000000184(Ccnd2),ENSMUSG00000000275(Trim25),ENSMUSG00000000317(Bcl6b),ENSMUSG00000000409(Lck),ENSMUSG00000000441(Raf1),ENSMUSG00000000532(Acvr1b),ENSMUSG00000000555(Itga5),ENSMUSG00000000730(Dnmt3l),ENSMUSG00000000838(Fmr1),ENSMUSG00000000915(Hip1r),ENSMUSG00000000957(Mmp14),ENSMUSG00000000982(Ccl3),ENSMUSG00000000983(Wfdc18),ENSMUSG00000001123(Lgals9),ENSMUSG000…	ENSMUSG00000000028(Cdc45),ENSMUSG00000000037(Scml2),ENSMUSG00000000149(Gna12),ENSMUSG00000000282(Mnt),ENSMUSG00000000326(Comt),ENSMUSG00000000440(Pparg),ENSMUSG00000000693(Loxl3),ENSMUSG00000000869(Il4),ENSMUSG00000000881(Dlg3),ENSMUSG00000001228(Uhrf1),ENSMUSG00000001552(Jup),ENSMUSG00000001761(Smo),ENSMUSG00000002068(Ccne1),ENSMUSG00000002083(Bbc3),ENSMUSG00000002107(Celf2),ENSMUSG00000002409(D…
BP	GO:0001819	positive regulation of cytokine production	140	39	179	447	1.2533e-28	2.45004e-26	ENSMUSG00000000732(Icosl),ENSMUSG00000000776(Polr3d),ENSMUSG00000000982(Ccl3),ENSMUSG00000001123(Lgals9),ENSMUSG00000002897(Il17ra),ENSMUSG00000004040(Stat3),ENSMUSG00000004043(Stat5a),ENSMUSG00000004296(Il12b),ENSMUSG00000004709(Cd244a),ENSMUSG00000008496(Pou2f2),ENSMUSG00000011008(Mcoln2),ENSMUSG00000015316(Slamf1),ENSMUSG00000015340(Cybb),ENSMUSG00000015396(Cd83),ENSMUSG00000015957(Wnt11),ENSM…	ENSMUSG00000000869(Il4),ENSMUSG00000001741(Il16),ENSMUSG00000006800(Sulf2),ENSMUSG00000010047(Hyal2),ENSMUSG00000010054(Tusc2),ENSMUSG00000014158(Trpv4),ENSMUSG00000017146(Brca1),ENSMUSG00000020399(Havcr2),ENSMUSG00000021356(Irf4),ENSMUSG00000021699(Pde4d),ENSMUSG00000022708(Zbtb20),ENSMUSG00000024349(Sting1),ENSMUSG00000026012(Cd28),ENSMUSG00000026228(Htr2b),ENSMUSG00000026842(Abl1),ENSMUSG00000…
BP	GO:0050793	regulation of developmental process	394	308	702	2724	2.29913e-28	4.43903e-26	ENSMUSG00000000317(Bcl6b),ENSMUSG00000000409(Lck),ENSMUSG00000000532(Acvr1b),ENSMUSG00000000555(Itga5),ENSMUSG00000000628(Hk2),ENSMUSG00000000957(Mmp14),ENSMUSG00000000982(Ccl3),ENSMUSG00000001052(Sec24b),ENSMUSG00000001123(Lgals9),ENSMUSG00000001288(Rarg),ENSMUSG00000001300(Efnb2),ENSMUSG00000001627(Ifrd1),ENSMUSG00000001707(Eef1e1),ENSMUSG00000001785(Pwp1),ENSMUSG00000002111(Spi1),ENSMUSG000000…	ENSMUSG00000000149(Gna12),ENSMUSG00000000440(Pparg),ENSMUSG00000000693(Loxl3),ENSMUSG00000000869(Il4),ENSMUSG00000001227(Sema6b),ENSMUSG00000001552(Jup),ENSMUSG00000001761(Smo),ENSMUSG00000002068(Ccne1),ENSMUSG00000002274(Metrn),ENSMUSG00000003282(Plag1),ENSMUSG00000003575(Crtc1),ENSMUSG00000003882(Il7r),ENSMUSG00000004099(Dnmt1),ENSMUSG00000004462(Tbccd1),ENSMUSG00000004530(Coro1c),ENSMUSG000000…
BP	GO:0043085	positive regulation of catalytic activity	223	165	388	1292	3.07798e-28	5.8703e-26	ENSMUSG00000000184(Ccnd2),ENSMUSG00000000409(Lck),ENSMUSG00000000441(Raf1),ENSMUSG00000000915(Hip1r),ENSMUSG00000000982(Ccl3),ENSMUSG00000001123(Lgals9),ENSMUSG00000001175(Calm1),ENSMUSG00000002233(Rhoc),ENSMUSG00000002307(Daxx),ENSMUSG00000002413(Braf),ENSMUSG00000002602(Axl),ENSMUSG00000002699(Lcp2),ENSMUSG00000003948(Mmd),ENSMUSG00000004040(Stat3),ENSMUSG00000004221(Ikbkg),ENSMUSG00000004296(I…	ENSMUSG00000000440(Pparg),ENSMUSG00000000869(Il4),ENSMUSG00000000881(Dlg3),ENSMUSG00000001995(Sipa1l2),ENSMUSG00000002083(Bbc3),ENSMUSG00000003134(Tbc1d8),ENSMUSG00000004530(Coro1c),ENSMUSG00000004633(Chn2),ENSMUSG00000005370(Msh6),ENSMUSG00000005514(Por),ENSMUSG00000005583(Mef2c),ENSMUSG00000005718(Tfap4),ENSMUSG00000005958(Ephb3),ENSMUSG00000014361(Mertk),ENSMUSG00000014426(Map3k4),ENSMUSG00000…
BP	GO:0010033	response to organic substance	526	304	830	3345	3.49273e-28	6.58107e-26	ENSMUSG00000000275(Trim25),ENSMUSG00000000441(Raf1),ENSMUSG00000000532(Acvr1b),ENSMUSG00000000628(Hk2),ENSMUSG00000000957(Mmp14),ENSMUSG00000000982(Ccl3),ENSMUSG00000001123(Lgals9),ENSMUSG00000001175(Calm1),ENSMUSG00000001248(Gramd1a),ENSMUSG00000001288(Rarg),ENSMUSG00000001348(Acp5),ENSMUSG00000001663(Gstt1),ENSMUSG00000001707(Eef1e1),ENSMUSG00000002103(Acp2),ENSMUSG00000002111(Spi1),ENSMUSG0000…	ENSMUSG00000000326(Comt),ENSMUSG00000000440(Pparg),ENSMUSG00000000631(Myo18a),ENSMUSG00000000869(Il4),ENSMUSG00000001552(Jup),ENSMUSG00000001761(Smo),ENSMUSG00000002870(Mcm2),ENSMUSG00000003378(Grik5),ENSMUSG00000003518(Dusp3),ENSMUSG00000003882(Il7r),ENSMUSG00000004071(Cdip1),ENSMUSG00000004099(Dnmt1),ENSMUSG00000004347(Pde1c),ENSMUSG00000004698(Hdac9),ENSMUSG00000005102(Eif2ak4),ENSMUSG00000005…
BP	GO:0008219	cell death	345	215	560	2076	2.14914e-27	4.00123e-25	ENSMUSG00000000184(Ccnd2),ENSMUSG00000000409(Lck),ENSMUSG00000000441(Raf1),ENSMUSG00000000532(Acvr1b),ENSMUSG00000000555(Itga5),ENSMUSG00000000628(Hk2),ENSMUSG00000000915(Hip1r),ENSMUSG00000000982(Ccl3),ENSMUSG00000001288(Rarg),ENSMUSG00000001300(Efnb2),ENSMUSG00000001435(Col18a1),ENSMUSG00000001707(Eef1e1),ENSMUSG00000002103(Acp2),ENSMUSG00000002111(Spi1),ENSMUSG00000002307(Daxx),ENSMUSG00000002…	ENSMUSG00000000037(Scml2),ENSMUSG00000000282(Mnt),ENSMUSG00000000440(Pparg),ENSMUSG00000000631(Myo18a),ENSMUSG00000000869(Il4),ENSMUSG00000001761(Smo),ENSMUSG00000002083(Bbc3),ENSMUSG00000002104(Rapsn),ENSMUSG00000002289(Angptl4),ENSMUSG00000002486(Tchp),ENSMUSG00000002731(Prkra),ENSMUSG00000002870(Mcm2),ENSMUSG00000003378(Grik5),ENSMUSG00000003812(Dnase2a),ENSMUSG00000003882(Il7r),ENSMUSG0000000…
BP	GO:0016310	phosphorylation	341	264	605	2291	4.45925e-27	8.20449e-25	ENSMUSG00000000184(Ccnd2),ENSMUSG00000000409(Lck),ENSMUSG00000000441(Raf1),ENSMUSG00000000532(Acvr1b),ENSMUSG00000000555(Itga5),ENSMUSG00000000628(Hk2),ENSMUSG00000000982(Ccl3),ENSMUSG00000001123(Lgals9),ENSMUSG00000001630(Stk38l),ENSMUSG00000001785(Pwp1),ENSMUSG00000002307(Daxx),ENSMUSG00000002413(Braf),ENSMUSG00000002602(Axl),ENSMUSG00000002699(Lcp2),ENSMUSG00000002997(Prkar2b),ENSMUSG000000032…	ENSMUSG00000000869(Il4),ENSMUSG00000000881(Dlg3),ENSMUSG00000001755(Coasy),ENSMUSG00000002068(Ccne1),ENSMUSG00000002409(Dyrk1b),ENSMUSG00000002731(Prkra),ENSMUSG00000003518(Dusp3),ENSMUSG00000004530(Coro1c),ENSMUSG00000004798(Ulk2),ENSMUSG00000004933(Matk),ENSMUSG00000005102(Eif2ak4),ENSMUSG00000005583(Mef2c),ENSMUSG00000005699(Pard6a),ENSMUSG00000005718(Tfap4),ENSMUSG00000005893(Nr2c2),ENSMUSG00…
BP	GO:0042325	regulation of phosphorylation	268	185	453	1595	4.63578e-27	8.43011e-25	ENSMUSG00000000184(Ccnd2),ENSMUSG00000000409(Lck),ENSMUSG00000000441(Raf1),ENSMUSG00000000532(Acvr1b),ENSMUSG00000000555(Itga5),ENSMUSG00000000982(Ccl3),ENSMUSG00000001123(Lgals9),ENSMUSG00000001785(Pwp1),ENSMUSG00000002307(Daxx),ENSMUSG00000002413(Braf),ENSMUSG00000002602(Axl),ENSMUSG00000002699(Lcp2),ENSMUSG00000002997(Prkar2b),ENSMUSG00000003948(Mmd),ENSMUSG00000004040(Stat3),ENSMUSG0000000422…	ENSMUSG00000000869(Il4),ENSMUSG00000000881(Dlg3),ENSMUSG00000002068(Ccne1),ENSMUSG00000003518(Dusp3),ENSMUSG00000004530(Coro1c),ENSMUSG00000005102(Eif2ak4),ENSMUSG00000005583(Mef2c),ENSMUSG00000005699(Pard6a),ENSMUSG00000005718(Tfap4),ENSMUSG00000005958(Ephb3),ENSMUSG00000006235(Epor),ENSMUSG00000006362(Cbfa2t3),ENSMUSG00000006611(Hfe),ENSMUSG00000010047(Hyal2),ENSMUSG00000013483(Card14),ENSMUSG0…
BP	GO:0048534	hematopoietic or lymphoid organ development	187	114	301	939	5.50491e-27	9.89556e-25	ENSMUSG00000000409(Lck),ENSMUSG00000000441(Raf1),ENSMUSG00000000532(Acvr1b),ENSMUSG00000000957(Mmp14),ENSMUSG00000000982(Ccl3),ENSMUSG00000001123(Lgals9),ENSMUSG00000001288(Rarg),ENSMUSG00000002111(Spi1),ENSMUSG00000002413(Braf),ENSMUSG00000002602(Axl),ENSMUSG00000002983(Relb),ENSMUSG00000003070(Efna2),ENSMUSG00000004040(Stat3),ENSMUSG00000004043(Stat5a),ENSMUSG00000004266(Ptpn6),ENSMUSG000000042…	ENSMUSG00000000440(Pparg),ENSMUSG00000000693(Loxl3),ENSMUSG00000000751(Rpa1),ENSMUSG00000000869(Il4),ENSMUSG00000003812(Dnase2a),ENSMUSG00000003882(Il7r),ENSMUSG00000005583(Mef2c),ENSMUSG00000005958(Ephb3),ENSMUSG00000006362(Cbfa2t3),ENSMUSG00000010047(Hyal2),ENSMUSG00000010054(Tusc2),ENSMUSG00000014361(Mertk),ENSMUSG00000014905(Dnajb9),ENSMUSG00000016087(Fli1),ENSMUSG00000017697(Ada),ENSMUSG0000…
BP	GO:0051174	regulation of phosphorus metabolic process	290	204	494	1784	8.5416e-27	1.51798e-24	ENSMUSG00000000184(Ccnd2),ENSMUSG00000000409(Lck),ENSMUSG00000000441(Raf1),ENSMUSG00000000532(Acvr1b),ENSMUSG00000000555(Itga5),ENSMUSG00000000982(Ccl3),ENSMUSG00000001123(Lgals9),ENSMUSG00000001175(Calm1),ENSMUSG00000001785(Pwp1),ENSMUSG00000002307(Daxx),ENSMUSG00000002413(Braf),ENSMUSG00000002602(Axl),ENSMUSG00000002699(Lcp2),ENSMUSG00000002997(Prkar2b),ENSMUSG00000003948(Mmd),ENSMUSG0000000404…	ENSMUSG00000000869(Il4),ENSMUSG00000000881(Dlg3),ENSMUSG00000002068(Ccne1),ENSMUSG00000003518(Dusp3),ENSMUSG00000004530(Coro1c),ENSMUSG00000005102(Eif2ak4),ENSMUSG00000005583(Mef2c),ENSMUSG00000005699(Pard6a),ENSMUSG00000005718(Tfap4),ENSMUSG00000005958(Ephb3),ENSMUSG00000006235(Epor),ENSMUSG00000006362(Cbfa2t3),ENSMUSG00000006611(Hfe),ENSMUSG00000010047(Hyal2),ENSMUSG00000013483(Card14),ENSMUSG0…
BP	GO:0050776	regulation of immune response	166	64	230	655	9.96684e-27	1.75136e-24	ENSMUSG00000000409(Lck),ENSMUSG00000000732(Icosl),ENSMUSG00000000776(Polr3d),ENSMUSG00000001123(Lgals9),ENSMUSG00000002413(Braf),ENSMUSG00000002699(Lcp2),ENSMUSG00000003352(Cacnb3),ENSMUSG00000004043(Stat5a),ENSMUSG00000004266(Ptpn6),ENSMUSG00000004296(Il12b),ENSMUSG00000005057(Sh2b2),ENSMUSG00000005413(Hmox1),ENSMUSG00000005763(Cd247),ENSMUSG00000010358(Ifi35),ENSMUSG00000015316(Slamf1),ENSMUSG0…	ENSMUSG00000000440(Pparg),ENSMUSG00000000693(Loxl3),ENSMUSG00000000869(Il4),ENSMUSG00000003518(Dusp3),ENSMUSG00000003812(Dnase2a),ENSMUSG00000003882(Il7r),ENSMUSG00000005102(Eif2ak4),ENSMUSG00000005583(Mef2c),ENSMUSG00000006611(Hfe),ENSMUSG00000016933(Plcg1),ENSMUSG00000017550(Atad5),ENSMUSG00000017697(Ada),ENSMUSG00000018752(Tnfsfm13),ENSMUSG00000020101(Vsir),ENSMUSG00000020263(Appl2),ENSMUSG000…
BP	GO:0019220	regulation of phosphate metabolic process	289	204	493	1783	1.39473e-26	2.41281e-24	ENSMUSG00000000184(Ccnd2),ENSMUSG00000000409(Lck),ENSMUSG00000000441(Raf1),ENSMUSG00000000532(Acvr1b),ENSMUSG00000000555(Itga5),ENSMUSG00000000982(Ccl3),ENSMUSG00000001123(Lgals9),ENSMUSG00000001175(Calm1),ENSMUSG00000001785(Pwp1),ENSMUSG00000002307(Daxx),ENSMUSG00000002413(Braf),ENSMUSG00000002602(Axl),ENSMUSG00000002699(Lcp2),ENSMUSG00000002997(Prkar2b),ENSMUSG00000003948(Mmd),ENSMUSG0000000404…	ENSMUSG00000000869(Il4),ENSMUSG00000000881(Dlg3),ENSMUSG00000002068(Ccne1),ENSMUSG00000003518(Dusp3),ENSMUSG00000004530(Coro1c),ENSMUSG00000005102(Eif2ak4),ENSMUSG00000005583(Mef2c),ENSMUSG00000005699(Pard6a),ENSMUSG00000005718(Tfap4),ENSMUSG00000005958(Ephb3),ENSMUSG00000006235(Epor),ENSMUSG00000006362(Cbfa2t3),ENSMUSG00000006611(Hfe),ENSMUSG00000010047(Hyal2),ENSMUSG00000013483(Card14),ENSMUSG0…
BP	GO:0012501	programmed cell death	316	207	523	1920	1.40396e-26	2.41281e-24	ENSMUSG00000000184(Ccnd2),ENSMUSG00000000409(Lck),ENSMUSG00000000441(Raf1),ENSMUSG00000000532(Acvr1b),ENSMUSG00000000555(Itga5),ENSMUSG00000000628(Hk2),ENSMUSG00000000915(Hip1r),ENSMUSG00000000982(Ccl3),ENSMUSG00000001288(Rarg),ENSMUSG00000001435(Col18a1),ENSMUSG00000001707(Eef1e1),ENSMUSG00000002103(Acp2),ENSMUSG00000002111(Spi1),ENSMUSG00000002307(Daxx),ENSMUSG00000002413(Braf),ENSMUSG000000026…	ENSMUSG00000000037(Scml2),ENSMUSG00000000282(Mnt),ENSMUSG00000000440(Pparg),ENSMUSG00000000631(Myo18a),ENSMUSG00000000869(Il4),ENSMUSG00000001761(Smo),ENSMUSG00000002083(Bbc3),ENSMUSG00000002104(Rapsn),ENSMUSG00000002289(Angptl4),ENSMUSG00000002486(Tchp),ENSMUSG00000002731(Prkra),ENSMUSG00000002870(Mcm2),ENSMUSG00000003378(Grik5),ENSMUSG00000003812(Dnase2a),ENSMUSG00000003882(Il7r),ENSMUSG0000000…
BP	GO:0010648	negative regulation of cell communication	219	174	393	1340	2.35014e-26	3.99498e-24	ENSMUSG00000000441(Raf1),ENSMUSG00000000957(Mmp14),ENSMUSG00000001098(Kctd10),ENSMUSG00000001175(Calm1),ENSMUSG00000002413(Braf),ENSMUSG00000003208(Yju2),ENSMUSG00000004221(Ikbkg),ENSMUSG00000004266(Ptpn6),ENSMUSG00000004296(Il12b),ENSMUSG00000004446(Bid),ENSMUSG00000004936(Map2k1),ENSMUSG00000004952(Rasa4),ENSMUSG00000005087(Cd44),ENSMUSG00000005413(Hmox1),ENSMUSG00000006205(Htra1),ENSMUSG000000…	ENSMUSG00000000282(Mnt),ENSMUSG00000000440(Pparg),ENSMUSG00000000869(Il4),ENSMUSG00000003452(Bicd1),ENSMUSG00000003518(Dusp3),ENSMUSG00000004347(Pde1c),ENSMUSG00000006800(Sulf2),ENSMUSG00000008305(Tle1),ENSMUSG00000010047(Hyal2),ENSMUSG00000010461(Eya4),ENSMUSG00000010751(Tnfrsf22),ENSMUSG00000014905(Dnajb9),ENSMUSG00000015944(Castor2),ENSMUSG00000017146(Brca1),ENSMUSG00000017466(Timp2),ENSMUSG00…
BP	GO:0032268	regulation of cellular protein metabolic process	412	268	680	2660	2.41752e-26	4.06534e-24	ENSMUSG00000000184(Ccnd2),ENSMUSG00000000409(Lck),ENSMUSG00000000441(Raf1),ENSMUSG00000000532(Acvr1b),ENSMUSG00000000555(Itga5),ENSMUSG00000000838(Fmr1),ENSMUSG00000000915(Hip1r),ENSMUSG00000000957(Mmp14),ENSMUSG00000000982(Ccl3),ENSMUSG00000000983(Wfdc18),ENSMUSG00000001123(Lgals9),ENSMUSG00000001175(Calm1),ENSMUSG00000001785(Pwp1),ENSMUSG00000002111(Spi1),ENSMUSG00000002227(Mov10),ENSMUSG000000…	ENSMUSG00000000149(Gna12),ENSMUSG00000000440(Pparg),ENSMUSG00000000869(Il4),ENSMUSG00000000881(Dlg3),ENSMUSG00000001228(Uhrf1),ENSMUSG00000002068(Ccne1),ENSMUSG00000002083(Bbc3),ENSMUSG00000003518(Dusp3),ENSMUSG00000004099(Dnmt1),ENSMUSG00000004530(Coro1c),ENSMUSG00000005102(Eif2ak4),ENSMUSG00000005514(Por),ENSMUSG00000005583(Mef2c),ENSMUSG00000005699(Pard6a),ENSMUSG00000005718(Tfap4),ENSMUSG0000…
BP	GO:0006915	apoptotic process	308	204	512	1875	2.88356e-26	4.79744e-24	ENSMUSG00000000184(Ccnd2),ENSMUSG00000000409(Lck),ENSMUSG00000000441(Raf1),ENSMUSG00000000532(Acvr1b),ENSMUSG00000000555(Itga5),ENSMUSG00000000628(Hk2),ENSMUSG00000000915(Hip1r),ENSMUSG00000000982(Ccl3),ENSMUSG00000001288(Rarg),ENSMUSG00000001435(Col18a1),ENSMUSG00000001707(Eef1e1),ENSMUSG00000002111(Spi1),ENSMUSG00000002307(Daxx),ENSMUSG00000002413(Braf),ENSMUSG00000002602(Axl),ENSMUSG0000000303…	ENSMUSG00000000037(Scml2),ENSMUSG00000000282(Mnt),ENSMUSG00000000440(Pparg),ENSMUSG00000000631(Myo18a),ENSMUSG00000000869(Il4),ENSMUSG00000001761(Smo),ENSMUSG00000002083(Bbc3),ENSMUSG00000002104(Rapsn),ENSMUSG00000002289(Angptl4),ENSMUSG00000002486(Tchp),ENSMUSG00000002731(Prkra),ENSMUSG00000002870(Mcm2),ENSMUSG00000003378(Grik5),ENSMUSG00000003812(Dnase2a),ENSMUSG00000003882(Il7r),ENSMUSG0000000…
BP	GO:0006468	protein phosphorylation	300	218	518	1904	3.5214e-26	5.79696e-24	ENSMUSG00000000184(Ccnd2),ENSMUSG00000000409(Lck),ENSMUSG00000000441(Raf1),ENSMUSG00000000532(Acvr1b),ENSMUSG00000000555(Itga5),ENSMUSG00000000982(Ccl3),ENSMUSG00000001123(Lgals9),ENSMUSG00000001630(Stk38l),ENSMUSG00000001785(Pwp1),ENSMUSG00000002307(Daxx),ENSMUSG00000002413(Braf),ENSMUSG00000002602(Axl),ENSMUSG00000002699(Lcp2),ENSMUSG00000002997(Prkar2b),ENSMUSG00000003283(Hck),ENSMUSG000000039…	ENSMUSG00000000869(Il4),ENSMUSG00000000881(Dlg3),ENSMUSG00000002068(Ccne1),ENSMUSG00000002409(Dyrk1b),ENSMUSG00000002731(Prkra),ENSMUSG00000003518(Dusp3),ENSMUSG00000004530(Coro1c),ENSMUSG00000004798(Ulk2),ENSMUSG00000004933(Matk),ENSMUSG00000005102(Eif2ak4),ENSMUSG00000005583(Mef2c),ENSMUSG00000005699(Pard6a),ENSMUSG00000005718(Tfap4),ENSMUSG00000005893(Nr2c2),ENSMUSG00000005958(Ephb3),ENSMUSG00…
BP	GO:0023057	negative regulation of signaling	219	174	393	1343	3.79434e-26	6.18122e-24	ENSMUSG00000000441(Raf1),ENSMUSG00000000957(Mmp14),ENSMUSG00000001098(Kctd10),ENSMUSG00000001175(Calm1),ENSMUSG00000002413(Braf),ENSMUSG00000003208(Yju2),ENSMUSG00000004221(Ikbkg),ENSMUSG00000004266(Ptpn6),ENSMUSG00000004296(Il12b),ENSMUSG00000004446(Bid),ENSMUSG00000004936(Map2k1),ENSMUSG00000004952(Rasa4),ENSMUSG00000005087(Cd44),ENSMUSG00000005413(Hmox1),ENSMUSG00000006205(Htra1),ENSMUSG000000…	ENSMUSG00000000282(Mnt),ENSMUSG00000000440(Pparg),ENSMUSG00000000869(Il4),ENSMUSG00000003452(Bicd1),ENSMUSG00000003518(Dusp3),ENSMUSG00000004347(Pde1c),ENSMUSG00000006800(Sulf2),ENSMUSG00000008305(Tle1),ENSMUSG00000010047(Hyal2),ENSMUSG00000010461(Eya4),ENSMUSG00000010751(Tnfrsf22),ENSMUSG00000014905(Dnajb9),ENSMUSG00000015944(Castor2),ENSMUSG00000017146(Brca1),ENSMUSG00000017466(Timp2),ENSMUSG00…
BP	GO:0009968	negative regulation of signal transduction	198	160	358	1192	4.66254e-26	7.51727e-24	ENSMUSG00000000441(Raf1),ENSMUSG00000000957(Mmp14),ENSMUSG00000001098(Kctd10),ENSMUSG00000001175(Calm1),ENSMUSG00000003208(Yju2),ENSMUSG00000004221(Ikbkg),ENSMUSG00000004266(Ptpn6),ENSMUSG00000004296(Il12b),ENSMUSG00000004446(Bid),ENSMUSG00000004936(Map2k1),ENSMUSG00000004952(Rasa4),ENSMUSG00000005087(Cd44),ENSMUSG00000005413(Hmox1),ENSMUSG00000006205(Htra1),ENSMUSG00000006818(Sod2),ENSMUSG000000…	ENSMUSG00000000282(Mnt),ENSMUSG00000000440(Pparg),ENSMUSG00000000869(Il4),ENSMUSG00000003452(Bicd1),ENSMUSG00000003518(Dusp3),ENSMUSG00000006800(Sulf2),ENSMUSG00000008305(Tle1),ENSMUSG00000010047(Hyal2),ENSMUSG00000010461(Eya4),ENSMUSG00000010751(Tnfrsf22),ENSMUSG00000014905(Dnajb9),ENSMUSG00000015944(Castor2),ENSMUSG00000017146(Brca1),ENSMUSG00000017466(Timp2),ENSMUSG00000017550(Atad5),ENSMUSG00…
BP	GO:0009967	positive regulation of signal transduction	276	163	439	1551	7.18258e-26	1.14621e-23	ENSMUSG00000000275(Trim25),ENSMUSG00000000409(Lck),ENSMUSG00000000441(Raf1),ENSMUSG00000000532(Acvr1b),ENSMUSG00000000915(Hip1r),ENSMUSG00000000982(Ccl3),ENSMUSG00000001123(Lgals9),ENSMUSG00000001175(Calm1),ENSMUSG00000001707(Eef1e1),ENSMUSG00000002413(Braf),ENSMUSG00000002602(Axl),ENSMUSG00000003352(Cacnb3),ENSMUSG00000004040(Stat3),ENSMUSG00000004221(Ikbkg),ENSMUSG00000004266(Ptpn6),ENSMUSG0000…	ENSMUSG00000000693(Loxl3),ENSMUSG00000000869(Il4),ENSMUSG00000001761(Smo),ENSMUSG00000002083(Bbc3),ENSMUSG00000002731(Prkra),ENSMUSG00000003882(Il7r),ENSMUSG00000005514(Por),ENSMUSG00000005583(Mef2c),ENSMUSG00000005718(Tfap4),ENSMUSG00000006235(Epor),ENSMUSG00000006611(Hfe),ENSMUSG00000006800(Sulf2),ENSMUSG00000010047(Hyal2),ENSMUSG00000014158(Trpv4),ENSMUSG00000014426(Map3k4),ENSMUSG00000014592(…
BP	GO:0051240	positive regulation of multicellular organismal process	316	199	515	1897	8.59758e-26	1.35816e-23	ENSMUSG00000000409(Lck),ENSMUSG00000000532(Acvr1b),ENSMUSG00000000555(Itga5),ENSMUSG00000000628(Hk2),ENSMUSG00000000732(Icosl),ENSMUSG00000000776(Polr3d),ENSMUSG00000000957(Mmp14),ENSMUSG00000000982(Ccl3),ENSMUSG00000001123(Lgals9),ENSMUSG00000001300(Efnb2),ENSMUSG00000002413(Braf),ENSMUSG00000002602(Axl),ENSMUSG00000002897(Il17ra),ENSMUSG00000003352(Cacnb3),ENSMUSG00000003948(Mmd),ENSMUSG0000000…	ENSMUSG00000000440(Pparg),ENSMUSG00000000869(Il4),ENSMUSG00000001482(Def8),ENSMUSG00000001552(Jup),ENSMUSG00000001741(Il16),ENSMUSG00000001761(Smo),ENSMUSG00000002274(Metrn),ENSMUSG00000003282(Plag1),ENSMUSG00000003575(Crtc1),ENSMUSG00000003882(Il7r),ENSMUSG00000004698(Hdac9),ENSMUSG00000005514(Por),ENSMUSG00000005583(Mef2c),ENSMUSG00000005893(Nr2c2),ENSMUSG00000005958(Ephb3),ENSMUSG00000006235(E…
BP	GO:0051246	regulation of protein metabolic process	430	278	708	2806	8.86184e-26	1.3859e-23	ENSMUSG00000000184(Ccnd2),ENSMUSG00000000409(Lck),ENSMUSG00000000441(Raf1),ENSMUSG00000000532(Acvr1b),ENSMUSG00000000555(Itga5),ENSMUSG00000000838(Fmr1),ENSMUSG00000000915(Hip1r),ENSMUSG00000000957(Mmp14),ENSMUSG00000000982(Ccl3),ENSMUSG00000000983(Wfdc18),ENSMUSG00000001123(Lgals9),ENSMUSG00000001175(Calm1),ENSMUSG00000001467(Cyp51),ENSMUSG00000001785(Pwp1),ENSMUSG00000002111(Spi1),ENSMUSG000000…	ENSMUSG00000000149(Gna12),ENSMUSG00000000440(Pparg),ENSMUSG00000000869(Il4),ENSMUSG00000000881(Dlg3),ENSMUSG00000001228(Uhrf1),ENSMUSG00000002068(Ccne1),ENSMUSG00000002083(Bbc3),ENSMUSG00000003518(Dusp3),ENSMUSG00000004099(Dnmt1),ENSMUSG00000004530(Coro1c),ENSMUSG00000005102(Eif2ak4),ENSMUSG00000005514(Por),ENSMUSG00000005583(Mef2c),ENSMUSG00000005699(Pard6a),ENSMUSG00000005718(Tfap4),ENSMUSG0000…
BP	GO:0023056	positive regulation of signaling	304	184	488	1775	1.05111e-25	1.62756e-23	ENSMUSG00000000275(Trim25),ENSMUSG00000000409(Lck),ENSMUSG00000000441(Raf1),ENSMUSG00000000532(Acvr1b),ENSMUSG00000000915(Hip1r),ENSMUSG00000000982(Ccl3),ENSMUSG00000001123(Lgals9),ENSMUSG00000001175(Calm1),ENSMUSG00000001707(Eef1e1),ENSMUSG00000002413(Braf),ENSMUSG00000002602(Axl),ENSMUSG00000003352(Cacnb3),ENSMUSG00000004040(Stat3),ENSMUSG00000004221(Ikbkg),ENSMUSG00000004266(Ptpn6),ENSMUSG0000…	ENSMUSG00000000693(Loxl3),ENSMUSG00000000869(Il4),ENSMUSG00000001761(Smo),ENSMUSG00000002083(Bbc3),ENSMUSG00000002104(Rapsn),ENSMUSG00000002731(Prkra),ENSMUSG00000003575(Crtc1),ENSMUSG00000003882(Il7r),ENSMUSG00000005102(Eif2ak4),ENSMUSG00000005514(Por),ENSMUSG00000005583(Mef2c),ENSMUSG00000005718(Tfap4),ENSMUSG00000006235(Epor),ENSMUSG00000006611(Hfe),ENSMUSG00000006800(Sulf2),ENSMUSG00000009894…
BP	GO:0030097	hemopoiesis	175	111	286	895	2.00398e-25	3.07257e-23	ENSMUSG00000000409(Lck),ENSMUSG00000000532(Acvr1b),ENSMUSG00000000957(Mmp14),ENSMUSG00000000982(Ccl3),ENSMUSG00000001123(Lgals9),ENSMUSG00000001288(Rarg),ENSMUSG00000002111(Spi1),ENSMUSG00000002413(Braf),ENSMUSG00000002602(Axl),ENSMUSG00000002983(Relb),ENSMUSG00000003070(Efna2),ENSMUSG00000004040(Stat3),ENSMUSG00000004043(Stat5a),ENSMUSG00000004266(Ptpn6),ENSMUSG00000004296(Il12b),ENSMUSG00000006…	ENSMUSG00000000440(Pparg),ENSMUSG00000000693(Loxl3),ENSMUSG00000000751(Rpa1),ENSMUSG00000000869(Il4),ENSMUSG00000003812(Dnase2a),ENSMUSG00000003882(Il7r),ENSMUSG00000005583(Mef2c),ENSMUSG00000006362(Cbfa2t3),ENSMUSG00000010047(Hyal2),ENSMUSG00000010054(Tusc2),ENSMUSG00000014361(Mertk),ENSMUSG00000014905(Dnajb9),ENSMUSG00000016087(Fli1),ENSMUSG00000017697(Ada),ENSMUSG00000018669(Cdk5rap3),ENSMUSG0…
BP	GO:0019538	protein metabolic process	709	549	1258	5580	2.61869e-25	3.97608e-23	ENSMUSG00000000184(Ccnd2),ENSMUSG00000000275(Trim25),ENSMUSG00000000385(Tmprss2),ENSMUSG00000000409(Lck),ENSMUSG00000000441(Raf1),ENSMUSG00000000532(Acvr1b),ENSMUSG00000000555(Itga5),ENSMUSG00000000838(Fmr1),ENSMUSG00000000915(Hip1r),ENSMUSG00000000957(Mmp14),ENSMUSG00000000982(Ccl3),ENSMUSG00000000983(Wfdc18),ENSMUSG00000001098(Kctd10),ENSMUSG00000001123(Lgals9),ENSMUSG00000001175(Calm1),ENSMUSG…	ENSMUSG00000000037(Scml2),ENSMUSG00000000149(Gna12),ENSMUSG00000000440(Pparg),ENSMUSG00000000693(Loxl3),ENSMUSG00000000869(Il4),ENSMUSG00000000881(Dlg3),ENSMUSG00000001054(Rmnd5b),ENSMUSG00000001228(Uhrf1),ENSMUSG00000001865(Cpa3),ENSMUSG00000002068(Ccne1),ENSMUSG00000002083(Bbc3),ENSMUSG00000002109(Ddb2),ENSMUSG00000002329(Mdp1),ENSMUSG00000002409(Dyrk1b),ENSMUSG00000002731(Prkra),ENSMUSG0000000…
BP	GO:0010647	positive regulation of cell communication	302	183	485	1769	2.96687e-25	4.46143e-23	ENSMUSG00000000275(Trim25),ENSMUSG00000000409(Lck),ENSMUSG00000000441(Raf1),ENSMUSG00000000532(Acvr1b),ENSMUSG00000000915(Hip1r),ENSMUSG00000000982(Ccl3),ENSMUSG00000001123(Lgals9),ENSMUSG00000001175(Calm1),ENSMUSG00000001707(Eef1e1),ENSMUSG00000002413(Braf),ENSMUSG00000002602(Axl),ENSMUSG00000003352(Cacnb3),ENSMUSG00000004040(Stat3),ENSMUSG00000004221(Ikbkg),ENSMUSG00000004266(Ptpn6),ENSMUSG0000…	ENSMUSG00000000693(Loxl3),ENSMUSG00000000869(Il4),ENSMUSG00000001761(Smo),ENSMUSG00000002083(Bbc3),ENSMUSG00000002104(Rapsn),ENSMUSG00000002731(Prkra),ENSMUSG00000003575(Crtc1),ENSMUSG00000003882(Il7r),ENSMUSG00000005102(Eif2ak4),ENSMUSG00000005514(Por),ENSMUSG00000005583(Mef2c),ENSMUSG00000005718(Tfap4),ENSMUSG00000006235(Epor),ENSMUSG00000006611(Hfe),ENSMUSG00000006800(Sulf2),ENSMUSG00000009894…
MF	GO:0019899	enzyme binding	341	264	605	2327	5.32903e-25	7.88426e-23	ENSMUSG00000000184(Ccnd2),ENSMUSG00000000409(Lck),ENSMUSG00000000441(Raf1),ENSMUSG00000000730(Dnmt3l),ENSMUSG00000001098(Kctd10),ENSMUSG00000001123(Lgals9),ENSMUSG00000001175(Calm1),ENSMUSG00000001440(Kpnb1),ENSMUSG00000002233(Rhoc),ENSMUSG00000002307(Daxx),ENSMUSG00000002413(Braf),ENSMUSG00000002658(Gtf2f1),ENSMUSG00000002983(Relb),ENSMUSG00000002997(Prkar2b),ENSMUSG00000003352(Cacnb3),ENSMUSG00…	ENSMUSG00000000440(Pparg),ENSMUSG00000000881(Dlg3),ENSMUSG00000001552(Jup),ENSMUSG00000002068(Ccne1),ENSMUSG00000002083(Bbc3),ENSMUSG00000002731(Prkra),ENSMUSG00000002870(Mcm2),ENSMUSG00000003134(Tbc1d8),ENSMUSG00000003153(Slc2a3),ENSMUSG00000003452(Bicd1),ENSMUSG00000003518(Dusp3),ENSMUSG00000004099(Dnmt1),ENSMUSG00000004530(Coro1c),ENSMUSG00000004698(Hdac9),ENSMUSG00000005198(Polr2a),ENSMUSG000…
BP	GO:0009617	response to bacterium	196	51	247	740	5.3439e-25	7.88426e-23	ENSMUSG00000000204(Slfn4),ENSMUSG00000000682(Cd52),ENSMUSG00000000982(Ccl3),ENSMUSG00000000983(Wfdc18),ENSMUSG00000001123(Lgals9),ENSMUSG00000001348(Acp5),ENSMUSG00000002602(Axl),ENSMUSG00000003283(Hck),ENSMUSG00000004296(Il12b),ENSMUSG00000006403(Adamts4),ENSMUSG00000006818(Sod2),ENSMUSG00000007655(Cav1),ENSMUSG00000015755(Tab2),ENSMUSG00000016496(Cd274),ENSMUSG00000016528(Mapkapk2),ENSMUSG00000…	ENSMUSG00000000326(Comt),ENSMUSG00000003882(Il7r),ENSMUSG00000005150(Wdr83),ENSMUSG00000005583(Mef2c),ENSMUSG00000005951(Shpk),ENSMUSG00000008855(Hdac5),ENSMUSG00000010054(Tusc2),ENSMUSG00000020399(Havcr2),ENSMUSG00000020889(Nr1d1),ENSMUSG00000021250(Fos),ENSMUSG00000021699(Pde4d),ENSMUSG00000023990(Tfeb),ENSMUSG00000024975(Pdcd4),ENSMUSG00000025372(Baiap2),ENSMUSG00000026433(Rab29),ENSMUSG000000…
BP	GO:1901700	response to oxygen-containing compound	303	185	488	1789	6.88069e-25	1.00567e-22	ENSMUSG00000000275(Trim25),ENSMUSG00000000409(Lck),ENSMUSG00000000441(Raf1),ENSMUSG00000000982(Ccl3),ENSMUSG00000001123(Lgals9),ENSMUSG00000001175(Calm1),ENSMUSG00000001248(Gramd1a),ENSMUSG00000001288(Rarg),ENSMUSG00000001348(Acp5),ENSMUSG00000001663(Gstt1),ENSMUSG00000002111(Spi1),ENSMUSG00000002413(Braf),ENSMUSG00000002602(Axl),ENSMUSG00000003849(Nqo1),ENSMUSG00000004040(Stat3),ENSMUSG000000040…	ENSMUSG00000000326(Comt),ENSMUSG00000000440(Pparg),ENSMUSG00000001552(Jup),ENSMUSG00000001761(Smo),ENSMUSG00000003378(Grik5),ENSMUSG00000004099(Dnmt1),ENSMUSG00000004347(Pde1c),ENSMUSG00000004698(Hdac9),ENSMUSG00000005150(Wdr83),ENSMUSG00000005514(Por),ENSMUSG00000005583(Mef2c),ENSMUSG00000005718(Tfap4),ENSMUSG00000005951(Shpk),ENSMUSG00000006235(Epor),ENSMUSG00000008855(Hdac5),ENSMUSG00000010047…
BP	GO:0031399	regulation of protein modification process	300	205	505	1868	7.85946e-25	1.13809e-22	ENSMUSG00000000184(Ccnd2),ENSMUSG00000000409(Lck),ENSMUSG00000000441(Raf1),ENSMUSG00000000532(Acvr1b),ENSMUSG00000000555(Itga5),ENSMUSG00000000982(Ccl3),ENSMUSG00000001123(Lgals9),ENSMUSG00000001175(Calm1),ENSMUSG00000001785(Pwp1),ENSMUSG00000002111(Spi1),ENSMUSG00000002307(Daxx),ENSMUSG00000002413(Braf),ENSMUSG00000002699(Lcp2),ENSMUSG00000002997(Prkar2b),ENSMUSG00000003948(Mmd),ENSMUSG000000042…	ENSMUSG00000000869(Il4),ENSMUSG00000000881(Dlg3),ENSMUSG00000002068(Ccne1),ENSMUSG00000003518(Dusp3),ENSMUSG00000004099(Dnmt1),ENSMUSG00000004530(Coro1c),ENSMUSG00000005102(Eif2ak4),ENSMUSG00000005583(Mef2c),ENSMUSG00000005699(Pard6a),ENSMUSG00000005718(Tfap4),ENSMUSG00000006235(Epor),ENSMUSG00000006611(Hfe),ENSMUSG00000010047(Hyal2),ENSMUSG00000013483(Card14),ENSMUSG00000014158(Trpv4),ENSMUSG000…
BP	GO:0010941	regulation of cell death	292	178	470	1709	9.1558e-25	1.31365e-22	ENSMUSG00000000184(Ccnd2),ENSMUSG00000000409(Lck),ENSMUSG00000000441(Raf1),ENSMUSG00000000555(Itga5),ENSMUSG00000000915(Hip1r),ENSMUSG00000000982(Ccl3),ENSMUSG00000001288(Rarg),ENSMUSG00000001300(Efnb2),ENSMUSG00000001435(Col18a1),ENSMUSG00000001707(Eef1e1),ENSMUSG00000002307(Daxx),ENSMUSG00000002413(Braf),ENSMUSG00000002602(Axl),ENSMUSG00000003283(Hck),ENSMUSG00000003541(Ier3),ENSMUSG00000003849…	ENSMUSG00000000282(Mnt),ENSMUSG00000000440(Pparg),ENSMUSG00000000631(Myo18a),ENSMUSG00000000869(Il4),ENSMUSG00000001761(Smo),ENSMUSG00000002083(Bbc3),ENSMUSG00000002104(Rapsn),ENSMUSG00000002289(Angptl4),ENSMUSG00000002731(Prkra),ENSMUSG00000003378(Grik5),ENSMUSG00000003882(Il7r),ENSMUSG00000004099(Dnmt1),ENSMUSG00000005102(Eif2ak4),ENSMUSG00000005514(Por),ENSMUSG00000005583(Mef2c),ENSMUSG0000000…
BP	GO:0002831	regulation of response to biotic stimulus	105	23	128	294	1.0821e-24	1.53845e-22	ENSMUSG00000000776(Polr3d),ENSMUSG00000001123(Lgals9),ENSMUSG00000004043(Stat5a),ENSMUSG00000004296(Il12b),ENSMUSG00000006205(Htra1),ENSMUSG00000010358(Ifi35),ENSMUSG00000016496(Cd274),ENSMUSG00000017776(Crk),ENSMUSG00000017830(Dhx58),ENSMUSG00000018899(Irf1),ENSMUSG00000019471(Cdc37),ENSMUSG00000019842(Traf3ip2),ENSMUSG00000019850(Tnfaip3),ENSMUSG00000020115(Tbk1),ENSMUSG00000020227(Irak3),ENSMU…	ENSMUSG00000000440(Pparg),ENSMUSG00000000869(Il4),ENSMUSG00000005102(Eif2ak4),ENSMUSG00000020263(Appl2),ENSMUSG00000020399(Havcr2),ENSMUSG00000022471(Xrcc6),ENSMUSG00000022672(Prkdc),ENSMUSG00000024349(Sting1),ENSMUSG00000026187(Xrcc5),ENSMUSG00000026471(Mr1),ENSMUSG00000027843(Ptpn22),ENSMUSG00000028456(Unc13b),ENSMUSG00000029821(Gsdme),ENSMUSG00000032109(Nlrx1),ENSMUSG00000034292(Traf3ip1),ENSM…
BP	GO:0002694	regulation of leukocyte activation	118	71	189	517	1.81648e-24	2.55928e-22	ENSMUSG00000000409(Lck),ENSMUSG00000000732(Icosl),ENSMUSG00000000957(Mmp14),ENSMUSG00000001123(Lgals9),ENSMUSG00000001300(Efnb2),ENSMUSG00000002413(Braf),ENSMUSG00000002602(Axl),ENSMUSG00000004043(Stat5a),ENSMUSG00000004266(Ptpn6),ENSMUSG00000004296(Il12b),ENSMUSG00000004709(Cd244a),ENSMUSG00000005413(Hmox1),ENSMUSG00000007655(Cav1),ENSMUSG00000015316(Slamf1),ENSMUSG00000015396(Cd83),ENSMUSG00000…	ENSMUSG00000000631(Myo18a),ENSMUSG00000000693(Loxl3),ENSMUSG00000000869(Il4),ENSMUSG00000003518(Dusp3),ENSMUSG00000003882(Il7r),ENSMUSG00000005583(Mef2c),ENSMUSG00000005951(Shpk),ENSMUSG00000006611(Hfe),ENSMUSG00000013707(Tnfaip8l2),ENSMUSG00000014361(Mertk),ENSMUSG00000017550(Atad5),ENSMUSG00000017697(Ada),ENSMUSG00000018752(Tnfsfm13),ENSMUSG00000020101(Vsir),ENSMUSG00000020399(Havcr2),ENSMUSG00…
BP	GO:1901701	cellular response to oxygen-containing compound	223	136	359	1219	1.97692e-24	2.76045e-22	ENSMUSG00000000441(Raf1),ENSMUSG00000000982(Ccl3),ENSMUSG00000001248(Gramd1a),ENSMUSG00000001288(Rarg),ENSMUSG00000002111(Spi1),ENSMUSG00000002602(Axl),ENSMUSG00000003849(Nqo1),ENSMUSG00000004040(Stat3),ENSMUSG00000004043(Stat5a),ENSMUSG00000004296(Il12b),ENSMUSG00000005057(Sh2b2),ENSMUSG00000005732(Ranbp1),ENSMUSG00000006740(Kif5b),ENSMUSG00000006818(Sod2),ENSMUSG00000007655(Cav1),ENSMUSG0000000…	ENSMUSG00000000440(Pparg),ENSMUSG00000001552(Jup),ENSMUSG00000001761(Smo),ENSMUSG00000003378(Grik5),ENSMUSG00000004099(Dnmt1),ENSMUSG00000004347(Pde1c),ENSMUSG00000004698(Hdac9),ENSMUSG00000005514(Por),ENSMUSG00000005583(Mef2c),ENSMUSG00000005718(Tfap4),ENSMUSG00000005951(Shpk),ENSMUSG00000006235(Epor),ENSMUSG00000008855(Hdac5),ENSMUSG00000015944(Castor2),ENSMUSG00000015968(Cacna1d),ENSMUSG000000…
BP	GO:0071840	cellular component organization or biogenesis	701	648	1349	6082	2.03138e-24	2.81139e-22	ENSMUSG00000000441(Raf1),ENSMUSG00000000532(Acvr1b),ENSMUSG00000000555(Itga5),ENSMUSG00000000628(Hk2),ENSMUSG00000000730(Dnmt3l),ENSMUSG00000000915(Hip1r),ENSMUSG00000000957(Mmp14),ENSMUSG00000000982(Ccl3),ENSMUSG00000001052(Sec24b),ENSMUSG00000001056(Nhp2),ENSMUSG00000001098(Kctd10),ENSMUSG00000001175(Calm1),ENSMUSG00000001248(Gramd1a),ENSMUSG00000001300(Efnb2),ENSMUSG00000001305(Rrp15),ENSMUSG0…	ENSMUSG00000000028(Cdc45),ENSMUSG00000000037(Scml2),ENSMUSG00000000440(Pparg),ENSMUSG00000000631(Myo18a),ENSMUSG00000000693(Loxl3),ENSMUSG00000000751(Rpa1),ENSMUSG00000000869(Il4),ENSMUSG00000000881(Dlg3),ENSMUSG00000001143(Lman2l),ENSMUSG00000001227(Sema6b),ENSMUSG00000001228(Uhrf1),ENSMUSG00000001482(Def8),ENSMUSG00000001552(Jup),ENSMUSG00000001751(Naglu),ENSMUSG00000001761(Smo),ENSMUSG00000002…
CC	GO:0070013	intracellular organelle lumen	557	507	1064	4613	2.38839e-24	3.27649e-22	ENSMUSG00000000078(Klf6),ENSMUSG00000000184(Ccnd2),ENSMUSG00000000275(Trim25),ENSMUSG00000000317(Bcl6b),ENSMUSG00000000441(Raf1),ENSMUSG00000000730(Dnmt3l),ENSMUSG00000000776(Polr3d),ENSMUSG00000000838(Fmr1),ENSMUSG00000001056(Nhp2),ENSMUSG00000001098(Kctd10),ENSMUSG00000001175(Calm1),ENSMUSG00000001288(Rarg),ENSMUSG00000001440(Kpnb1),ENSMUSG00000001542(Ell2),ENSMUSG00000001632(Brpf1),ENSMUSG0000…	ENSMUSG00000000028(Cdc45),ENSMUSG00000000056(Narf),ENSMUSG00000000282(Mnt),ENSMUSG00000000440(Pparg),ENSMUSG00000000751(Rpa1),ENSMUSG00000000823(Zfp512b),ENSMUSG00000001228(Uhrf1),ENSMUSG00000001741(Il16),ENSMUSG00000001755(Coasy),ENSMUSG00000002068(Ccne1),ENSMUSG00000002107(Celf2),ENSMUSG00000002109(Ddb2),ENSMUSG00000002257(Def6),ENSMUSG00000002409(Dyrk1b),ENSMUSG00000002731(Prkra),ENSMUSG000000…
CC	GO:0031974	membrane-enclosed lumen	557	507	1064	4614	2.5961e-24	3.50003e-22	ENSMUSG00000000078(Klf6),ENSMUSG00000000184(Ccnd2),ENSMUSG00000000275(Trim25),ENSMUSG00000000317(Bcl6b),ENSMUSG00000000441(Raf1),ENSMUSG00000000730(Dnmt3l),ENSMUSG00000000776(Polr3d),ENSMUSG00000000838(Fmr1),ENSMUSG00000001056(Nhp2),ENSMUSG00000001098(Kctd10),ENSMUSG00000001175(Calm1),ENSMUSG00000001288(Rarg),ENSMUSG00000001440(Kpnb1),ENSMUSG00000001542(Ell2),ENSMUSG00000001632(Brpf1),ENSMUSG0000…	ENSMUSG00000000028(Cdc45),ENSMUSG00000000056(Narf),ENSMUSG00000000282(Mnt),ENSMUSG00000000440(Pparg),ENSMUSG00000000751(Rpa1),ENSMUSG00000000823(Zfp512b),ENSMUSG00000001228(Uhrf1),ENSMUSG00000001741(Il16),ENSMUSG00000001755(Coasy),ENSMUSG00000002068(Ccne1),ENSMUSG00000002107(Celf2),ENSMUSG00000002109(Ddb2),ENSMUSG00000002257(Def6),ENSMUSG00000002409(Dyrk1b),ENSMUSG00000002731(Prkra),ENSMUSG000000…
CC	GO:0043233	organelle lumen	557	507	1064	4614	2.5961e-24	3.50003e-22	ENSMUSG00000000078(Klf6),ENSMUSG00000000184(Ccnd2),ENSMUSG00000000275(Trim25),ENSMUSG00000000317(Bcl6b),ENSMUSG00000000441(Raf1),ENSMUSG00000000730(Dnmt3l),ENSMUSG00000000776(Polr3d),ENSMUSG00000000838(Fmr1),ENSMUSG00000001056(Nhp2),ENSMUSG00000001098(Kctd10),ENSMUSG00000001175(Calm1),ENSMUSG00000001288(Rarg),ENSMUSG00000001440(Kpnb1),ENSMUSG00000001542(Ell2),ENSMUSG00000001632(Brpf1),ENSMUSG0000…	ENSMUSG00000000028(Cdc45),ENSMUSG00000000056(Narf),ENSMUSG00000000282(Mnt),ENSMUSG00000000440(Pparg),ENSMUSG00000000751(Rpa1),ENSMUSG00000000823(Zfp512b),ENSMUSG00000001228(Uhrf1),ENSMUSG00000001741(Il16),ENSMUSG00000001755(Coasy),ENSMUSG00000002068(Ccne1),ENSMUSG00000002107(Celf2),ENSMUSG00000002109(Ddb2),ENSMUSG00000002257(Def6),ENSMUSG00000002409(Dyrk1b),ENSMUSG00000002731(Prkra),ENSMUSG000000…
BP	GO:0050865	regulation of cell activation	125	74	199	558	3.50676e-24	4.68737e-22	ENSMUSG00000000409(Lck),ENSMUSG00000000732(Icosl),ENSMUSG00000000957(Mmp14),ENSMUSG00000001123(Lgals9),ENSMUSG00000001300(Efnb2),ENSMUSG00000002413(Braf),ENSMUSG00000002602(Axl),ENSMUSG00000004043(Stat5a),ENSMUSG00000004266(Ptpn6),ENSMUSG00000004296(Il12b),ENSMUSG00000004709(Cd244a),ENSMUSG00000005413(Hmox1),ENSMUSG00000007655(Cav1),ENSMUSG00000015316(Slamf1),ENSMUSG00000015396(Cd83),ENSMUSG00000…	ENSMUSG00000000631(Myo18a),ENSMUSG00000000693(Loxl3),ENSMUSG00000000869(Il4),ENSMUSG00000003518(Dusp3),ENSMUSG00000003882(Il7r),ENSMUSG00000005583(Mef2c),ENSMUSG00000005951(Shpk),ENSMUSG00000006611(Hfe),ENSMUSG00000013707(Tnfaip8l2),ENSMUSG00000014361(Mertk),ENSMUSG00000017550(Atad5),ENSMUSG00000017697(Ada),ENSMUSG00000018752(Tnfsfm13),ENSMUSG00000020101(Vsir),ENSMUSG00000020399(Havcr2),ENSMUSG00…
BP	GO:0002521	leukocyte differentiation	124	76	200	563	4.6398e-24	6.14931e-22	ENSMUSG00000000409(Lck),ENSMUSG00000000957(Mmp14),ENSMUSG00000000982(Ccl3),ENSMUSG00000001123(Lgals9),ENSMUSG00000002111(Spi1),ENSMUSG00000002413(Braf),ENSMUSG00000002602(Axl),ENSMUSG00000002983(Relb),ENSMUSG00000003070(Efna2),ENSMUSG00000004040(Stat3),ENSMUSG00000004043(Stat5a),ENSMUSG00000004266(Ptpn6),ENSMUSG00000004296(Il12b),ENSMUSG00000006705(Pknox1),ENSMUSG00000008496(Pou2f2),ENSMUSG000000…	ENSMUSG00000000440(Pparg),ENSMUSG00000000693(Loxl3),ENSMUSG00000000869(Il4),ENSMUSG00000003882(Il7r),ENSMUSG00000005583(Mef2c),ENSMUSG00000006362(Cbfa2t3),ENSMUSG00000010054(Tusc2),ENSMUSG00000014361(Mertk),ENSMUSG00000014905(Dnajb9),ENSMUSG00000017697(Ada),ENSMUSG00000019966(Kitl),ENSMUSG00000020101(Vsir),ENSMUSG00000020453(Patz1),ENSMUSG00000020605(Hs1bp3),ENSMUSG00000020689(Itgb3),ENSMUSG00000…
BP	GO:0002237	response to molecule of bacterial origin	119	31	150	376	5.64356e-24	7.41678e-22	ENSMUSG00000000982(Ccl3),ENSMUSG00000001123(Lgals9),ENSMUSG00000001348(Acp5),ENSMUSG00000002602(Axl),ENSMUSG00000004296(Il12b),ENSMUSG00000006818(Sod2),ENSMUSG00000015755(Tab2),ENSMUSG00000016496(Cd274),ENSMUSG00000016528(Mapkapk2),ENSMUSG00000016529(Il10),ENSMUSG00000017002(Slpi),ENSMUSG00000017631(Abr),ENSMUSG00000017652(Cd40),ENSMUSG00000018920(Cxcl16),ENSMUSG00000019850(Tnfaip3),ENSMUSG000000…	ENSMUSG00000000326(Comt),ENSMUSG00000005150(Wdr83),ENSMUSG00000005583(Mef2c),ENSMUSG00000005951(Shpk),ENSMUSG00000008855(Hdac5),ENSMUSG00000020399(Havcr2),ENSMUSG00000020889(Nr1d1),ENSMUSG00000021250(Fos),ENSMUSG00000021699(Pde4d),ENSMUSG00000024975(Pdcd4),ENSMUSG00000026842(Abl1),ENSMUSG00000027843(Ptpn22),ENSMUSG00000028914(Casp9),ENSMUSG00000029468(P2rx7),ENSMUSG00000031613(Hpgd),ENSMUSG000000…
BP	GO:0001932	regulation of protein phosphorylation	247	164	411	1456	5.89655e-24	7.68467e-22	ENSMUSG00000000184(Ccnd2),ENSMUSG00000000409(Lck),ENSMUSG00000000441(Raf1),ENSMUSG00000000532(Acvr1b),ENSMUSG00000000555(Itga5),ENSMUSG00000000982(Ccl3),ENSMUSG00000001123(Lgals9),ENSMUSG00000001785(Pwp1),ENSMUSG00000002307(Daxx),ENSMUSG00000002413(Braf),ENSMUSG00000002699(Lcp2),ENSMUSG00000002997(Prkar2b),ENSMUSG00000003948(Mmd),ENSMUSG00000004221(Ikbkg),ENSMUSG00000004266(Ptpn6),ENSMUSG00000004…	ENSMUSG00000000869(Il4),ENSMUSG00000000881(Dlg3),ENSMUSG00000002068(Ccne1),ENSMUSG00000003518(Dusp3),ENSMUSG00000004530(Coro1c),ENSMUSG00000005102(Eif2ak4),ENSMUSG00000005583(Mef2c),ENSMUSG00000005699(Pard6a),ENSMUSG00000005718(Tfap4),ENSMUSG00000006235(Epor),ENSMUSG00000006611(Hfe),ENSMUSG00000010047(Hyal2),ENSMUSG00000013483(Card14),ENSMUSG00000014158(Trpv4),ENSMUSG00000014426(Map3k4),ENSMUSG00…
BP	GO:2000026	regulation of multicellular organismal development	312	249	561	2145	6.24405e-24	8.07031e-22	ENSMUSG00000000409(Lck),ENSMUSG00000000532(Acvr1b),ENSMUSG00000000555(Itga5),ENSMUSG00000000628(Hk2),ENSMUSG00000000957(Mmp14),ENSMUSG00000000982(Ccl3),ENSMUSG00000001052(Sec24b),ENSMUSG00000001123(Lgals9),ENSMUSG00000001288(Rarg),ENSMUSG00000001300(Efnb2),ENSMUSG00000001627(Ifrd1),ENSMUSG00000002111(Spi1),ENSMUSG00000002227(Mov10),ENSMUSG00000002413(Braf),ENSMUSG00000002602(Axl),ENSMUSG000000039…	ENSMUSG00000000440(Pparg),ENSMUSG00000000693(Loxl3),ENSMUSG00000000869(Il4),ENSMUSG00000001227(Sema6b),ENSMUSG00000001552(Jup),ENSMUSG00000001761(Smo),ENSMUSG00000002274(Metrn),ENSMUSG00000003282(Plag1),ENSMUSG00000003575(Crtc1),ENSMUSG00000003882(Il7r),ENSMUSG00000004099(Dnmt1),ENSMUSG00000004698(Hdac9),ENSMUSG00000004798(Ulk2),ENSMUSG00000005102(Eif2ak4),ENSMUSG00000005514(Por),ENSMUSG000000055…
BP	GO:0043067	regulation of programmed cell death	265	169	434	1560	6.43094e-24	8.24372e-22	ENSMUSG00000000184(Ccnd2),ENSMUSG00000000409(Lck),ENSMUSG00000000441(Raf1),ENSMUSG00000000555(Itga5),ENSMUSG00000000915(Hip1r),ENSMUSG00000000982(Ccl3),ENSMUSG00000001288(Rarg),ENSMUSG00000001435(Col18a1),ENSMUSG00000001707(Eef1e1),ENSMUSG00000002413(Braf),ENSMUSG00000002602(Axl),ENSMUSG00000003283(Hck),ENSMUSG00000003541(Ier3),ENSMUSG00000003849(Nqo1),ENSMUSG00000004043(Stat5a),ENSMUSG0000000422…	ENSMUSG00000000282(Mnt),ENSMUSG00000000440(Pparg),ENSMUSG00000000631(Myo18a),ENSMUSG00000000869(Il4),ENSMUSG00000001761(Smo),ENSMUSG00000002083(Bbc3),ENSMUSG00000002104(Rapsn),ENSMUSG00000002289(Angptl4),ENSMUSG00000002731(Prkra),ENSMUSG00000003378(Grik5),ENSMUSG00000003882(Il7r),ENSMUSG00000004099(Dnmt1),ENSMUSG00000005102(Eif2ak4),ENSMUSG00000005514(Por),ENSMUSG00000005583(Mef2c),ENSMUSG0000000…
MF	GO:0000166	nucleotide binding	286	280	566	2166	7.32599e-24	9.23961e-22	ENSMUSG00000000409(Lck),ENSMUSG00000000441(Raf1),ENSMUSG00000000532(Acvr1b),ENSMUSG00000000628(Hk2),ENSMUSG00000001416(Cct3),ENSMUSG00000001473(Tubb6),ENSMUSG00000001630(Stk38l),ENSMUSG00000002227(Mov10),ENSMUSG00000002233(Rhoc),ENSMUSG00000002413(Braf),ENSMUSG00000002602(Axl),ENSMUSG00000002997(Prkar2b),ENSMUSG00000003283(Hck),ENSMUSG00000004591(Pkn2),ENSMUSG00000004936(Map2k1),ENSMUSG0000000674…	ENSMUSG00000000149(Gna12),ENSMUSG00000000631(Myo18a),ENSMUSG00000001228(Uhrf1),ENSMUSG00000001755(Coasy),ENSMUSG00000002409(Dyrk1b),ENSMUSG00000002870(Mcm2),ENSMUSG00000003809(Gcdh),ENSMUSG00000004099(Dnmt1),ENSMUSG00000004187(Kifc2),ENSMUSG00000004347(Pde1c),ENSMUSG00000004768(Rab23),ENSMUSG00000004798(Ulk2),ENSMUSG00000004933(Matk),ENSMUSG00000005102(Eif2ak4),ENSMUSG00000005370(Msh6),ENSMUSG000…
MF	GO:1901265	nucleoside phosphate binding	286	280	566	2166	7.32599e-24	9.23961e-22	ENSMUSG00000000409(Lck),ENSMUSG00000000441(Raf1),ENSMUSG00000000532(Acvr1b),ENSMUSG00000000628(Hk2),ENSMUSG00000001416(Cct3),ENSMUSG00000001473(Tubb6),ENSMUSG00000001630(Stk38l),ENSMUSG00000002227(Mov10),ENSMUSG00000002233(Rhoc),ENSMUSG00000002413(Braf),ENSMUSG00000002602(Axl),ENSMUSG00000002997(Prkar2b),ENSMUSG00000003283(Hck),ENSMUSG00000004591(Pkn2),ENSMUSG00000004936(Map2k1),ENSMUSG0000000674…	ENSMUSG00000000149(Gna12),ENSMUSG00000000631(Myo18a),ENSMUSG00000001228(Uhrf1),ENSMUSG00000001755(Coasy),ENSMUSG00000002409(Dyrk1b),ENSMUSG00000002870(Mcm2),ENSMUSG00000003809(Gcdh),ENSMUSG00000004099(Dnmt1),ENSMUSG00000004187(Kifc2),ENSMUSG00000004347(Pde1c),ENSMUSG00000004768(Rab23),ENSMUSG00000004798(Ulk2),ENSMUSG00000004933(Matk),ENSMUSG00000005102(Eif2ak4),ENSMUSG00000005370(Msh6),ENSMUSG000…
CC	GO:0005654	nucleoplasm	443	415	858	3593	1.18077e-23	1.47728e-21	ENSMUSG00000000078(Klf6),ENSMUSG00000000184(Ccnd2),ENSMUSG00000000275(Trim25),ENSMUSG00000000317(Bcl6b),ENSMUSG00000000441(Raf1),ENSMUSG00000000730(Dnmt3l),ENSMUSG00000000776(Polr3d),ENSMUSG00000001056(Nhp2),ENSMUSG00000001098(Kctd10),ENSMUSG00000001175(Calm1),ENSMUSG00000001288(Rarg),ENSMUSG00000001440(Kpnb1),ENSMUSG00000001542(Ell2),ENSMUSG00000001632(Brpf1),ENSMUSG00000001707(Eef1e1),ENSMUSG00…	ENSMUSG00000000028(Cdc45),ENSMUSG00000000056(Narf),ENSMUSG00000000282(Mnt),ENSMUSG00000000440(Pparg),ENSMUSG00000000751(Rpa1),ENSMUSG00000000823(Zfp512b),ENSMUSG00000001228(Uhrf1),ENSMUSG00000001741(Il16),ENSMUSG00000002068(Ccne1),ENSMUSG00000002107(Celf2),ENSMUSG00000002109(Ddb2),ENSMUSG00000002257(Def6),ENSMUSG00000002409(Dyrk1b),ENSMUSG00000002731(Prkra),ENSMUSG00000002870(Mcm2),ENSMUSG0000000…
BP	GO:0016043	cellular component organization	670	640	1310	5901	1.19406e-23	1.48206e-21	ENSMUSG00000000441(Raf1),ENSMUSG00000000532(Acvr1b),ENSMUSG00000000555(Itga5),ENSMUSG00000000628(Hk2),ENSMUSG00000000730(Dnmt3l),ENSMUSG00000000915(Hip1r),ENSMUSG00000000957(Mmp14),ENSMUSG00000000982(Ccl3),ENSMUSG00000001052(Sec24b),ENSMUSG00000001056(Nhp2),ENSMUSG00000001098(Kctd10),ENSMUSG00000001175(Calm1),ENSMUSG00000001248(Gramd1a),ENSMUSG00000001300(Efnb2),ENSMUSG00000001416(Cct3),ENSMUSG00…	ENSMUSG00000000028(Cdc45),ENSMUSG00000000037(Scml2),ENSMUSG00000000440(Pparg),ENSMUSG00000000631(Myo18a),ENSMUSG00000000693(Loxl3),ENSMUSG00000000751(Rpa1),ENSMUSG00000000869(Il4),ENSMUSG00000000881(Dlg3),ENSMUSG00000001143(Lman2l),ENSMUSG00000001227(Sema6b),ENSMUSG00000001228(Uhrf1),ENSMUSG00000001482(Def8),ENSMUSG00000001552(Jup),ENSMUSG00000001751(Naglu),ENSMUSG00000001761(Smo),ENSMUSG00000002…
BP	GO:0051179	localization	684	639	1323	5970	1.27079e-23	1.56488e-21	ENSMUSG00000000275(Trim25),ENSMUSG00000000385(Tmprss2),ENSMUSG00000000409(Lck),ENSMUSG00000000441(Raf1),ENSMUSG00000000532(Acvr1b),ENSMUSG00000000555(Itga5),ENSMUSG00000000628(Hk2),ENSMUSG00000000915(Hip1r),ENSMUSG00000000957(Mmp14),ENSMUSG00000000982(Ccl3),ENSMUSG00000001052(Sec24b),ENSMUSG00000001123(Lgals9),ENSMUSG00000001175(Calm1),ENSMUSG00000001248(Gramd1a),ENSMUSG00000001300(Efnb2),ENSMUSG…	ENSMUSG00000000037(Scml2),ENSMUSG00000000149(Gna12),ENSMUSG00000000326(Comt),ENSMUSG00000000440(Pparg),ENSMUSG00000000631(Myo18a),ENSMUSG00000000693(Loxl3),ENSMUSG00000000751(Rpa1),ENSMUSG00000000869(Il4),ENSMUSG00000000881(Dlg3),ENSMUSG00000001138(Cnnm3),ENSMUSG00000001143(Lman2l),ENSMUSG00000001227(Sema6b),ENSMUSG00000001482(Def8),ENSMUSG00000001552(Jup),ENSMUSG00000001741(Il16),ENSMUSG00000001…
BP	GO:0009615	response to virus	111	23	134	322	1.4975e-23	1.82964e-21	ENSMUSG00000000275(Trim25),ENSMUSG00000000776(Polr3d),ENSMUSG00000001123(Lgals9),ENSMUSG00000002227(Mov10),ENSMUSG00000002658(Gtf2f1),ENSMUSG00000004296(Il12b),ENSMUSG00000006205(Htra1),ENSMUSG00000008496(Pou2f2),ENSMUSG00000012519(Mlkl),ENSMUSG00000015671(Psma2),ENSMUSG00000017652(Cd40),ENSMUSG00000017830(Dhx58),ENSMUSG00000018583(G3bp1),ENSMUSG00000018899(Irf1),ENSMUSG00000019842(Traf3ip2),ENSM…	ENSMUSG00000000869(Il4),ENSMUSG00000005102(Eif2ak4),ENSMUSG00000010047(Hyal2),ENSMUSG00000010051(Hyal1),ENSMUSG00000021703(Serinc5),ENSMUSG00000022051(Bnip3l),ENSMUSG00000023150(Ivns1abp),ENSMUSG00000024349(Sting1),ENSMUSG00000026469(Xpr1),ENSMUSG00000027843(Ptpn22),ENSMUSG00000028832(Stmn1),ENSMUSG00000029821(Gsdme),ENSMUSG00000030314(Atg7),ENSMUSG00000032109(Nlrx1),ENSMUSG00000033777(Tlr13),ENS…
CC	GO:0031981	nuclear lumen	505	454	959	4104	1.80018e-23	2.18241e-21	ENSMUSG00000000078(Klf6),ENSMUSG00000000184(Ccnd2),ENSMUSG00000000275(Trim25),ENSMUSG00000000317(Bcl6b),ENSMUSG00000000441(Raf1),ENSMUSG00000000730(Dnmt3l),ENSMUSG00000000776(Polr3d),ENSMUSG00000000838(Fmr1),ENSMUSG00000001056(Nhp2),ENSMUSG00000001098(Kctd10),ENSMUSG00000001175(Calm1),ENSMUSG00000001288(Rarg),ENSMUSG00000001440(Kpnb1),ENSMUSG00000001542(Ell2),ENSMUSG00000001632(Brpf1),ENSMUSG0000…	ENSMUSG00000000028(Cdc45),ENSMUSG00000000056(Narf),ENSMUSG00000000282(Mnt),ENSMUSG00000000440(Pparg),ENSMUSG00000000751(Rpa1),ENSMUSG00000000823(Zfp512b),ENSMUSG00000001228(Uhrf1),ENSMUSG00000001741(Il16),ENSMUSG00000002068(Ccne1),ENSMUSG00000002107(Celf2),ENSMUSG00000002109(Ddb2),ENSMUSG00000002257(Def6),ENSMUSG00000002409(Dyrk1b),ENSMUSG00000002731(Prkra),ENSMUSG00000002870(Mcm2),ENSMUSG0000000…
BP	GO:0033554	cellular response to stress	248	239	487	1810	1.91467e-23	2.30335e-21	ENSMUSG00000000275(Trim25),ENSMUSG00000000628(Hk2),ENSMUSG00000001707(Eef1e1),ENSMUSG00000002307(Daxx),ENSMUSG00000002413(Braf),ENSMUSG00000002602(Axl),ENSMUSG00000002983(Relb),ENSMUSG00000003208(Yju2),ENSMUSG00000003541(Ier3),ENSMUSG00000003849(Nqo1),ENSMUSG00000004221(Ikbkg),ENSMUSG00000004446(Bid),ENSMUSG00000004936(Map2k1),ENSMUSG00000005087(Cd44),ENSMUSG00000005413(Hmox1),ENSMUSG00000006818(…	ENSMUSG00000000028(Cdc45),ENSMUSG00000000326(Comt),ENSMUSG00000000440(Pparg),ENSMUSG00000000751(Rpa1),ENSMUSG00000001228(Uhrf1),ENSMUSG00000002083(Bbc3),ENSMUSG00000002109(Ddb2),ENSMUSG00000002289(Angptl4),ENSMUSG00000002731(Prkra),ENSMUSG00000002835(Chaf1a),ENSMUSG00000002870(Mcm2),ENSMUSG00000003518(Dusp3),ENSMUSG00000004071(Cdip1),ENSMUSG00000005102(Eif2ak4),ENSMUSG00000005370(Msh6),ENSMUSG000…
BP	GO:0032270	positive regulation of cellular protein metabolic process	271	170	441	1600	2.01606e-23	2.4068e-21	ENSMUSG00000000184(Ccnd2),ENSMUSG00000000409(Lck),ENSMUSG00000000441(Raf1),ENSMUSG00000000532(Acvr1b),ENSMUSG00000000555(Itga5),ENSMUSG00000000915(Hip1r),ENSMUSG00000000957(Mmp14),ENSMUSG00000000982(Ccl3),ENSMUSG00000001123(Lgals9),ENSMUSG00000001175(Calm1),ENSMUSG00000002307(Daxx),ENSMUSG00000002413(Braf),ENSMUSG00000002699(Lcp2),ENSMUSG00000003948(Mmd),ENSMUSG00000004040(Stat3),ENSMUSG000000042…	ENSMUSG00000000440(Pparg),ENSMUSG00000000869(Il4),ENSMUSG00000000881(Dlg3),ENSMUSG00000001228(Uhrf1),ENSMUSG00000002083(Bbc3),ENSMUSG00000004099(Dnmt1),ENSMUSG00000005102(Eif2ak4),ENSMUSG00000005583(Mef2c),ENSMUSG00000005718(Tfap4),ENSMUSG00000006235(Epor),ENSMUSG00000006362(Cbfa2t3),ENSMUSG00000006611(Hfe),ENSMUSG00000013483(Card14),ENSMUSG00000014158(Trpv4),ENSMUSG00000014426(Map3k4),ENSMUSG000…
BP	GO:0050727	regulation of inflammatory response	99	42	141	348	2.25954e-23	2.67705e-21	ENSMUSG00000000317(Bcl6b),ENSMUSG00000000982(Ccl3),ENSMUSG00000001123(Lgals9),ENSMUSG00000001348(Acp5),ENSMUSG00000002897(Il17ra),ENSMUSG00000004040(Stat3),ENSMUSG00000004043(Stat5a),ENSMUSG00000004296(Il12b),ENSMUSG00000010358(Ifi35),ENSMUSG00000016529(Il10),ENSMUSG00000017631(Abr),ENSMUSG00000018500(Adora2b),ENSMUSG00000019850(Tnfaip3),ENSMUSG00000020122(Egfr),ENSMUSG00000020178(Adora2a),ENSMUS…	ENSMUSG00000000440(Pparg),ENSMUSG00000000869(Il4),ENSMUSG00000001741(Il16),ENSMUSG00000005951(Shpk),ENSMUSG00000010047(Hyal2),ENSMUSG00000013707(Tnfaip8l2),ENSMUSG00000014158(Trpv4),ENSMUSG00000017697(Ada),ENSMUSG00000019768(Esr1),ENSMUSG00000020263(Appl2),ENSMUSG00000020889(Nr1d1),ENSMUSG00000021775(Nr1d2),ENSMUSG00000022105(Rb1),ENSMUSG00000022667(Cd200r1),ENSMUSG00000024349(Sting1),ENSMUSG0000…
BP	GO:0051247	positive regulation of protein metabolic process	279	178	457	1674	2.35595e-23	2.77028e-21	ENSMUSG00000000184(Ccnd2),ENSMUSG00000000409(Lck),ENSMUSG00000000441(Raf1),ENSMUSG00000000532(Acvr1b),ENSMUSG00000000555(Itga5),ENSMUSG00000000915(Hip1r),ENSMUSG00000000957(Mmp14),ENSMUSG00000000982(Ccl3),ENSMUSG00000001123(Lgals9),ENSMUSG00000001175(Calm1),ENSMUSG00000002307(Daxx),ENSMUSG00000002413(Braf),ENSMUSG00000002699(Lcp2),ENSMUSG00000003948(Mmd),ENSMUSG00000004040(Stat3),ENSMUSG000000042…	ENSMUSG00000000440(Pparg),ENSMUSG00000000869(Il4),ENSMUSG00000000881(Dlg3),ENSMUSG00000001228(Uhrf1),ENSMUSG00000002083(Bbc3),ENSMUSG00000004099(Dnmt1),ENSMUSG00000005102(Eif2ak4),ENSMUSG00000005583(Mef2c),ENSMUSG00000005718(Tfap4),ENSMUSG00000006235(Epor),ENSMUSG00000006362(Cbfa2t3),ENSMUSG00000006611(Hfe),ENSMUSG00000013483(Card14),ENSMUSG00000014158(Trpv4),ENSMUSG00000014426(Map3k4),ENSMUSG000…
BP	GO:0048731	system development	586	511	1097	4808	2.94177e-23	3.43331e-21	ENSMUSG00000000409(Lck),ENSMUSG00000000441(Raf1),ENSMUSG00000000532(Acvr1b),ENSMUSG00000000555(Itga5),ENSMUSG00000000628(Hk2),ENSMUSG00000000730(Dnmt3l),ENSMUSG00000000732(Icosl),ENSMUSG00000000838(Fmr1),ENSMUSG00000000915(Hip1r),ENSMUSG00000000957(Mmp14),ENSMUSG00000000982(Ccl3),ENSMUSG00000001052(Sec24b),ENSMUSG00000001098(Kctd10),ENSMUSG00000001123(Lgals9),ENSMUSG00000001288(Rarg),ENSMUSG00000…	ENSMUSG00000000440(Pparg),ENSMUSG00000000693(Loxl3),ENSMUSG00000000751(Rpa1),ENSMUSG00000000869(Il4),ENSMUSG00000001053(N4bp3),ENSMUSG00000001227(Sema6b),ENSMUSG00000001552(Jup),ENSMUSG00000001751(Naglu),ENSMUSG00000001761(Smo),ENSMUSG00000002274(Metrn),ENSMUSG00000002289(Angptl4),ENSMUSG00000002409(Dyrk1b),ENSMUSG00000002731(Prkra),ENSMUSG00000002803(Btbd6),ENSMUSG00000002870(Mcm2),ENSMUSG000000…
BP	GO:0032496	response to lipopolysaccharide	113	31	144	360	3.38006e-23	3.91561e-21	ENSMUSG00000000982(Ccl3),ENSMUSG00000001123(Lgals9),ENSMUSG00000001348(Acp5),ENSMUSG00000002602(Axl),ENSMUSG00000004296(Il12b),ENSMUSG00000006818(Sod2),ENSMUSG00000015755(Tab2),ENSMUSG00000016496(Cd274),ENSMUSG00000016528(Mapkapk2),ENSMUSG00000016529(Il10),ENSMUSG00000017002(Slpi),ENSMUSG00000017631(Abr),ENSMUSG00000017652(Cd40),ENSMUSG00000018920(Cxcl16),ENSMUSG00000019850(Tnfaip3),ENSMUSG000000…	ENSMUSG00000000326(Comt),ENSMUSG00000005150(Wdr83),ENSMUSG00000005583(Mef2c),ENSMUSG00000005951(Shpk),ENSMUSG00000008855(Hdac5),ENSMUSG00000020399(Havcr2),ENSMUSG00000020889(Nr1d1),ENSMUSG00000021250(Fos),ENSMUSG00000021699(Pde4d),ENSMUSG00000024975(Pdcd4),ENSMUSG00000026842(Abl1),ENSMUSG00000027843(Ptpn22),ENSMUSG00000028914(Casp9),ENSMUSG00000029468(P2rx7),ENSMUSG00000031613(Hpgd),ENSMUSG000000…
BP	GO:0042981	regulation of apoptotic process	260	165	425	1535	5.61488e-23	6.4567e-21	ENSMUSG00000000184(Ccnd2),ENSMUSG00000000409(Lck),ENSMUSG00000000441(Raf1),ENSMUSG00000000555(Itga5),ENSMUSG00000000915(Hip1r),ENSMUSG00000000982(Ccl3),ENSMUSG00000001288(Rarg),ENSMUSG00000001435(Col18a1),ENSMUSG00000001707(Eef1e1),ENSMUSG00000002413(Braf),ENSMUSG00000002602(Axl),ENSMUSG00000003283(Hck),ENSMUSG00000003541(Ier3),ENSMUSG00000003849(Nqo1),ENSMUSG00000004043(Stat5a),ENSMUSG0000000422…	ENSMUSG00000000282(Mnt),ENSMUSG00000000440(Pparg),ENSMUSG00000000631(Myo18a),ENSMUSG00000000869(Il4),ENSMUSG00000001761(Smo),ENSMUSG00000002083(Bbc3),ENSMUSG00000002104(Rapsn),ENSMUSG00000002289(Angptl4),ENSMUSG00000002731(Prkra),ENSMUSG00000003378(Grik5),ENSMUSG00000003882(Il7r),ENSMUSG00000004099(Dnmt1),ENSMUSG00000005514(Por),ENSMUSG00000005583(Mef2c),ENSMUSG00000005718(Tfap4),ENSMUSG000000062…
BP	GO:0031349	positive regulation of defense response	95	22	117	269	1.22449e-22	1.3978e-20	ENSMUSG00000000776(Polr3d),ENSMUSG00000000982(Ccl3),ENSMUSG00000001123(Lgals9),ENSMUSG00000002897(Il17ra),ENSMUSG00000004040(Stat3),ENSMUSG00000004043(Stat5a),ENSMUSG00000004296(Il12b),ENSMUSG00000010358(Ifi35),ENSMUSG00000017830(Dhx58),ENSMUSG00000018500(Adora2b),ENSMUSG00000020115(Tbk1),ENSMUSG00000020122(Egfr),ENSMUSG00000020400(Tnip1),ENSMUSG00000020573(Pik3cg),ENSMUSG00000021025(Nfkbia),ENSM…	ENSMUSG00000001741(Il16),ENSMUSG00000005583(Mef2c),ENSMUSG00000010047(Hyal2),ENSMUSG00000014158(Trpv4),ENSMUSG00000020399(Havcr2),ENSMUSG00000022471(Xrcc6),ENSMUSG00000022672(Prkdc),ENSMUSG00000024349(Sting1),ENSMUSG00000024975(Pdcd4),ENSMUSG00000026012(Cd28),ENSMUSG00000026187(Xrcc5),ENSMUSG00000027239(Mdk),ENSMUSG00000028456(Unc13b),ENSMUSG00000031565(Fgfr1),ENSMUSG00000034957(Cebpa),ENSMUSG000…
BP	GO:0051338	regulation of transferase activity	164	125	289	943	1.47387e-22	1.67028e-20	ENSMUSG00000000184(Ccnd2),ENSMUSG00000000441(Raf1),ENSMUSG00000001123(Lgals9),ENSMUSG00000002307(Daxx),ENSMUSG00000002413(Braf),ENSMUSG00000002602(Axl),ENSMUSG00000002699(Lcp2),ENSMUSG00000002997(Prkar2b),ENSMUSG00000003948(Mmd),ENSMUSG00000004221(Ikbkg),ENSMUSG00000004266(Ptpn6),ENSMUSG00000004296(Il12b),ENSMUSG00000004936(Map2k1),ENSMUSG00000006262(Mob1b),ENSMUSG00000007655(Cav1),ENSMUSG0000001…	ENSMUSG00000000440(Pparg),ENSMUSG00000000869(Il4),ENSMUSG00000000881(Dlg3),ENSMUSG00000002068(Ccne1),ENSMUSG00000003518(Dusp3),ENSMUSG00000004530(Coro1c),ENSMUSG00000005583(Mef2c),ENSMUSG00000005718(Tfap4),ENSMUSG00000005958(Ephb3),ENSMUSG00000010047(Hyal2),ENSMUSG00000014361(Mertk),ENSMUSG00000014426(Map3k4),ENSMUSG00000016984(Etaa1),ENSMUSG00000018669(Cdk5rap3),ENSMUSG00000019773(Fbxo5),ENSMUSG…
BP	GO:0032103	positive regulation of response to external stimulus	123	33	156	409	1.60268e-22	1.80319e-20	ENSMUSG00000000776(Polr3d),ENSMUSG00000000982(Ccl3),ENSMUSG00000001123(Lgals9),ENSMUSG00000002413(Braf),ENSMUSG00000002897(Il17ra),ENSMUSG00000004040(Stat3),ENSMUSG00000004043(Stat5a),ENSMUSG00000004296(Il12b),ENSMUSG00000009376(Met),ENSMUSG00000010358(Ifi35),ENSMUSG00000014599(Csf1),ENSMUSG00000015316(Slamf1),ENSMUSG00000017830(Dhx58),ENSMUSG00000018500(Adora2b),ENSMUSG00000018736(Ndel1),ENSMUSG…	ENSMUSG00000000869(Il4),ENSMUSG00000001741(Il16),ENSMUSG00000010047(Hyal2),ENSMUSG00000014158(Trpv4),ENSMUSG00000020399(Havcr2),ENSMUSG00000022471(Xrcc6),ENSMUSG00000022672(Prkdc),ENSMUSG00000024349(Sting1),ENSMUSG00000024962(Vegfb),ENSMUSG00000024975(Pdcd4),ENSMUSG00000026012(Cd28),ENSMUSG00000026187(Xrcc5),ENSMUSG00000027239(Mdk),ENSMUSG00000028456(Unc13b),ENSMUSG00000031451(Gas6),ENSMUSG000000…
BP	GO:1902533	positive regulation of intracellular signal transduction	197	96	293	968	5.87657e-22	6.56455e-20	ENSMUSG00000000275(Trim25),ENSMUSG00000000409(Lck),ENSMUSG00000000441(Raf1),ENSMUSG00000000982(Ccl3),ENSMUSG00000001175(Calm1),ENSMUSG00000001707(Eef1e1),ENSMUSG00000002413(Braf),ENSMUSG00000002602(Axl),ENSMUSG00000004221(Ikbkg),ENSMUSG00000004266(Ptpn6),ENSMUSG00000004446(Bid),ENSMUSG00000004936(Map2k1),ENSMUSG00000005087(Cd44),ENSMUSG00000007655(Cav1),ENSMUSG00000010358(Ifi35),ENSMUSG0000001251…	ENSMUSG00000002083(Bbc3),ENSMUSG00000002731(Prkra),ENSMUSG00000005583(Mef2c),ENSMUSG00000006235(Epor),ENSMUSG00000014158(Trpv4),ENSMUSG00000014426(Map3k4),ENSMUSG00000014592(Camta1),ENSMUSG00000017466(Timp2),ENSMUSG00000017697(Ada),ENSMUSG00000018669(Cdk5rap3),ENSMUSG00000018849(Wwc1),ENSMUSG00000019768(Esr1),ENSMUSG00000019966(Kitl),ENSMUSG00000020189(Osbpl8),ENSMUSG00000020312(Shc2),ENSMUSG0000…
MF	GO:0043168	anion binding	354	346	700	2850	7.19138e-22	7.97632e-20	ENSMUSG00000000409(Lck),ENSMUSG00000000441(Raf1),ENSMUSG00000000532(Acvr1b),ENSMUSG00000000628(Hk2),ENSMUSG00000000915(Hip1r),ENSMUSG00000001416(Cct3),ENSMUSG00000001473(Tubb6),ENSMUSG00000001630(Stk38l),ENSMUSG00000002227(Mov10),ENSMUSG00000002233(Rhoc),ENSMUSG00000002413(Braf),ENSMUSG00000002602(Axl),ENSMUSG00000002812(Flii),ENSMUSG00000002997(Prkar2b),ENSMUSG00000003283(Hck),ENSMUSG00000004043…	ENSMUSG00000000149(Gna12),ENSMUSG00000000631(Myo18a),ENSMUSG00000001755(Coasy),ENSMUSG00000002409(Dyrk1b),ENSMUSG00000002870(Mcm2),ENSMUSG00000003809(Gcdh),ENSMUSG00000004187(Kifc2),ENSMUSG00000004347(Pde1c),ENSMUSG00000004768(Rab23),ENSMUSG00000004798(Ulk2),ENSMUSG00000004933(Matk),ENSMUSG00000005102(Eif2ak4),ENSMUSG00000005370(Msh6),ENSMUSG00000005514(Por),ENSMUSG00000005580(Adcy9),ENSMUSG00000…
BP	GO:0046649	lymphocyte activation	140	87	227	694	9.15534e-22	1.00831e-19	ENSMUSG00000000409(Lck),ENSMUSG00000000732(Icosl),ENSMUSG00000000957(Mmp14),ENSMUSG00000001123(Lgals9),ENSMUSG00000001300(Efnb2),ENSMUSG00000002111(Spi1),ENSMUSG00000002413(Braf),ENSMUSG00000002602(Axl),ENSMUSG00000002983(Relb),ENSMUSG00000003206(Ebi3),ENSMUSG00000004040(Stat3),ENSMUSG00000004043(Stat5a),ENSMUSG00000004266(Ptpn6),ENSMUSG00000004296(Il12b),ENSMUSG00000004709(Cd244a),ENSMUSG0000000…	ENSMUSG00000000693(Loxl3),ENSMUSG00000000869(Il4),ENSMUSG00000003518(Dusp3),ENSMUSG00000003882(Il7r),ENSMUSG00000005102(Eif2ak4),ENSMUSG00000005370(Msh6),ENSMUSG00000005583(Mef2c),ENSMUSG00000006611(Hfe),ENSMUSG00000010054(Tusc2),ENSMUSG00000013707(Tnfaip8l2),ENSMUSG00000014361(Mertk),ENSMUSG00000014905(Dnajb9),ENSMUSG00000017550(Atad5),ENSMUSG00000017697(Ada),ENSMUSG00000018752(Tnfsfm13),ENSMUSG…
BP	GO:0048856	anatomical structure development	697	603	1300	5918	1.87641e-21	2.05211e-19	ENSMUSG00000000409(Lck),ENSMUSG00000000441(Raf1),ENSMUSG00000000532(Acvr1b),ENSMUSG00000000555(Itga5),ENSMUSG00000000628(Hk2),ENSMUSG00000000730(Dnmt3l),ENSMUSG00000000732(Icosl),ENSMUSG00000000838(Fmr1),ENSMUSG00000000915(Hip1r),ENSMUSG00000000957(Mmp14),ENSMUSG00000000982(Ccl3),ENSMUSG00000001052(Sec24b),ENSMUSG00000001098(Kctd10),ENSMUSG00000001123(Lgals9),ENSMUSG00000001288(Rarg),ENSMUSG00000…	ENSMUSG00000000149(Gna12),ENSMUSG00000000440(Pparg),ENSMUSG00000000693(Loxl3),ENSMUSG00000000751(Rpa1),ENSMUSG00000000869(Il4),ENSMUSG00000000881(Dlg3),ENSMUSG00000001053(N4bp3),ENSMUSG00000001227(Sema6b),ENSMUSG00000001552(Jup),ENSMUSG00000001751(Naglu),ENSMUSG00000001761(Smo),ENSMUSG00000002083(Bbc3),ENSMUSG00000002274(Metrn),ENSMUSG00000002289(Angptl4),ENSMUSG00000002409(Dyrk1b),ENSMUSG0000000…
BP	GO:1903706	regulation of hemopoiesis	100	52	152	403	2.03105e-21	2.20581e-19	ENSMUSG00000000409(Lck),ENSMUSG00000000532(Acvr1b),ENSMUSG00000000957(Mmp14),ENSMUSG00000000982(Ccl3),ENSMUSG00000001123(Lgals9),ENSMUSG00000001288(Rarg),ENSMUSG00000002111(Spi1),ENSMUSG00000002413(Braf),ENSMUSG00000002602(Axl),ENSMUSG00000004040(Stat3),ENSMUSG00000004043(Stat5a),ENSMUSG00000004266(Ptpn6),ENSMUSG00000004296(Il12b),ENSMUSG00000014599(Csf1),ENSMUSG00000014773(Dll1),ENSMUSG000000153…	ENSMUSG00000000693(Loxl3),ENSMUSG00000000869(Il4),ENSMUSG00000003882(Il7r),ENSMUSG00000005583(Mef2c),ENSMUSG00000017697(Ada),ENSMUSG00000019966(Kitl),ENSMUSG00000020101(Vsir),ENSMUSG00000020689(Itgb3),ENSMUSG00000021127(Zfp36l1),ENSMUSG00000021250(Fos),ENSMUSG00000022105(Rb1),ENSMUSG00000022672(Prkdc),ENSMUSG00000025880(Smad7),ENSMUSG00000026012(Cd28),ENSMUSG00000026288(Inpp5d),ENSMUSG00000026842…
BP	GO:0002221	pattern recognition receptor signaling pathway	63	17	80	156	2.53014e-21	2.72888e-19	ENSMUSG00000001123(Lgals9),ENSMUSG00000007655(Cav1),ENSMUSG00000010358(Ifi35),ENSMUSG00000016528(Mapkapk2),ENSMUSG00000017652(Cd40),ENSMUSG00000017830(Dhx58),ENSMUSG00000018899(Irf1),ENSMUSG00000019850(Tnfaip3),ENSMUSG00000020134(Peli1),ENSMUSG00000020227(Irak3),ENSMUSG00000020400(Tnip1),ENSMUSG00000020641(Rsad2),ENSMUSG00000021025(Nfkbia),ENSMUSG00000021277(Traf3),ENSMUSG00000022892(App),ENSMUSG…	ENSMUSG00000019768(Esr1),ENSMUSG00000020263(Appl2),ENSMUSG00000020399(Havcr2),ENSMUSG00000020889(Nr1d1),ENSMUSG00000021356(Irf4),ENSMUSG00000027843(Ptpn22),ENSMUSG00000032109(Nlrx1),ENSMUSG00000033777(Tlr13),ENSMUSG00000034652(Cd300a),ENSMUSG00000035900(Gramd4),ENSMUSG00000036103(Colec12),ENSMUSG00000039005(Tlr4),ENSMUSG00000047798(Cd300lf),ENSMUSG00000050132(Sarm1),ENSMUSG00000052688(Rab7b),ENSM…
BP	GO:0009892	negative regulation of metabolic process	403	352	755	3141	3.33053e-21	3.56755e-19	ENSMUSG00000000317(Bcl6b),ENSMUSG00000000532(Acvr1b),ENSMUSG00000000628(Hk2),ENSMUSG00000000730(Dnmt3l),ENSMUSG00000000838(Fmr1),ENSMUSG00000000982(Ccl3),ENSMUSG00000000983(Wfdc18),ENSMUSG00000001123(Lgals9),ENSMUSG00000001288(Rarg),ENSMUSG00000001348(Acp5),ENSMUSG00000001467(Cyp51),ENSMUSG00000001785(Pwp1),ENSMUSG00000002111(Spi1),ENSMUSG00000002227(Mov10),ENSMUSG00000002307(Daxx),ENSMUSG0000000…	ENSMUSG00000000028(Cdc45),ENSMUSG00000000037(Scml2),ENSMUSG00000000282(Mnt),ENSMUSG00000000326(Comt),ENSMUSG00000000440(Pparg),ENSMUSG00000000693(Loxl3),ENSMUSG00000000869(Il4),ENSMUSG00000000881(Dlg3),ENSMUSG00000001228(Uhrf1),ENSMUSG00000001761(Smo),ENSMUSG00000002068(Ccne1),ENSMUSG00000002731(Prkra),ENSMUSG00000003282(Plag1),ENSMUSG00000003518(Dusp3),ENSMUSG00000004099(Dnmt1),ENSMUSG0000000453…
BP	GO:0010628	positive regulation of gene expression	366	231	597	2375	4.46291e-21	4.74799e-19	ENSMUSG00000000078(Klf6),ENSMUSG00000000275(Trim25),ENSMUSG00000000409(Lck),ENSMUSG00000000441(Raf1),ENSMUSG00000000532(Acvr1b),ENSMUSG00000000732(Icosl),ENSMUSG00000000776(Polr3d),ENSMUSG00000000957(Mmp14),ENSMUSG00000000982(Ccl3),ENSMUSG00000001123(Lgals9),ENSMUSG00000001288(Rarg),ENSMUSG00000001542(Ell2),ENSMUSG00000001627(Ifrd1),ENSMUSG00000001632(Brpf1),ENSMUSG00000001785(Pwp1),ENSMUSG000000…	ENSMUSG00000000440(Pparg),ENSMUSG00000000869(Il4),ENSMUSG00000001552(Jup),ENSMUSG00000001741(Il16),ENSMUSG00000001761(Smo),ENSMUSG00000002409(Dyrk1b),ENSMUSG00000003282(Plag1),ENSMUSG00000003575(Crtc1),ENSMUSG00000003882(Il7r),ENSMUSG00000003992(Ssbp2),ENSMUSG00000004099(Dnmt1),ENSMUSG00000004151(Etv1),ENSMUSG00000005102(Eif2ak4),ENSMUSG00000005198(Polr2a),ENSMUSG00000005583(Mef2c),ENSMUSG0000000…
BP	GO:0016477	cell migration	251	151	402	1464	5.03314e-21	5.31847e-19	ENSMUSG00000000532(Acvr1b),ENSMUSG00000000555(Itga5),ENSMUSG00000000957(Mmp14),ENSMUSG00000000982(Ccl3),ENSMUSG00000001123(Lgals9),ENSMUSG00000001300(Efnb2),ENSMUSG00000001435(Col18a1),ENSMUSG00000002233(Rhoc),ENSMUSG00000002413(Braf),ENSMUSG00000002602(Axl),ENSMUSG00000002897(Il17ra),ENSMUSG00000003665(Has1),ENSMUSG00000004040(Stat3),ENSMUSG00000004043(Stat5a),ENSMUSG00000004296(Il12b),ENSMUSG00…	ENSMUSG00000000149(Gna12),ENSMUSG00000000440(Pparg),ENSMUSG00000000631(Myo18a),ENSMUSG00000000869(Il4),ENSMUSG00000001227(Sema6b),ENSMUSG00000001552(Jup),ENSMUSG00000001741(Il16),ENSMUSG00000001761(Smo),ENSMUSG00000003518(Dusp3),ENSMUSG00000004462(Tbccd1),ENSMUSG00000004530(Coro1c),ENSMUSG00000004698(Hdac9),ENSMUSG00000005583(Mef2c),ENSMUSG00000005958(Ephb3),ENSMUSG00000006464(Bbs1),ENSMUSG000000…
BP	GO:0007275	multicellular organism development	635	558	1193	5373	5.46966e-21	5.74094e-19	ENSMUSG00000000409(Lck),ENSMUSG00000000441(Raf1),ENSMUSG00000000532(Acvr1b),ENSMUSG00000000555(Itga5),ENSMUSG00000000628(Hk2),ENSMUSG00000000730(Dnmt3l),ENSMUSG00000000732(Icosl),ENSMUSG00000000838(Fmr1),ENSMUSG00000000915(Hip1r),ENSMUSG00000000957(Mmp14),ENSMUSG00000000982(Ccl3),ENSMUSG00000001052(Sec24b),ENSMUSG00000001098(Kctd10),ENSMUSG00000001123(Lgals9),ENSMUSG00000001288(Rarg),ENSMUSG00000…	ENSMUSG00000000149(Gna12),ENSMUSG00000000440(Pparg),ENSMUSG00000000693(Loxl3),ENSMUSG00000000751(Rpa1),ENSMUSG00000000869(Il4),ENSMUSG00000001053(N4bp3),ENSMUSG00000001227(Sema6b),ENSMUSG00000001552(Jup),ENSMUSG00000001751(Naglu),ENSMUSG00000001761(Smo),ENSMUSG00000002083(Bbc3),ENSMUSG00000002274(Metrn),ENSMUSG00000002289(Angptl4),ENSMUSG00000002409(Dyrk1b),ENSMUSG00000002731(Prkra),ENSMUSG000000…
BP	GO:0009058	biosynthetic process	640	635	1275	5812	1.11671e-20	1.16428e-18	ENSMUSG00000000078(Klf6),ENSMUSG00000000275(Trim25),ENSMUSG00000000317(Bcl6b),ENSMUSG00000000441(Raf1),ENSMUSG00000000532(Acvr1b),ENSMUSG00000000730(Dnmt3l),ENSMUSG00000000776(Polr3d),ENSMUSG00000000838(Fmr1),ENSMUSG00000000982(Ccl3),ENSMUSG00000001056(Nhp2),ENSMUSG00000001288(Rarg),ENSMUSG00000001348(Acp5),ENSMUSG00000001416(Cct3),ENSMUSG00000001467(Cyp51),ENSMUSG00000001542(Ell2),ENSMUSG0000000…	ENSMUSG00000000028(Cdc45),ENSMUSG00000000037(Scml2),ENSMUSG00000000282(Mnt),ENSMUSG00000000440(Pparg),ENSMUSG00000000693(Loxl3),ENSMUSG00000000751(Rpa1),ENSMUSG00000000869(Il4),ENSMUSG00000001228(Uhrf1),ENSMUSG00000001552(Jup),ENSMUSG00000001755(Coasy),ENSMUSG00000001761(Smo),ENSMUSG00000002068(Ccne1),ENSMUSG00000002409(Dyrk1b),ENSMUSG00000002486(Tchp),ENSMUSG00000002835(Chaf1a),ENSMUSG0000000287…
BP	GO:0032502	developmental process	746	647	1393	6436	1.18605e-20	1.22838e-18	ENSMUSG00000000317(Bcl6b),ENSMUSG00000000409(Lck),ENSMUSG00000000441(Raf1),ENSMUSG00000000532(Acvr1b),ENSMUSG00000000555(Itga5),ENSMUSG00000000628(Hk2),ENSMUSG00000000730(Dnmt3l),ENSMUSG00000000732(Icosl),ENSMUSG00000000838(Fmr1),ENSMUSG00000000915(Hip1r),ENSMUSG00000000957(Mmp14),ENSMUSG00000000982(Ccl3),ENSMUSG00000001052(Sec24b),ENSMUSG00000001098(Kctd10),ENSMUSG00000001123(Lgals9),ENSMUSG0000…	ENSMUSG00000000149(Gna12),ENSMUSG00000000282(Mnt),ENSMUSG00000000326(Comt),ENSMUSG00000000440(Pparg),ENSMUSG00000000693(Loxl3),ENSMUSG00000000751(Rpa1),ENSMUSG00000000869(Il4),ENSMUSG00000000881(Dlg3),ENSMUSG00000001053(N4bp3),ENSMUSG00000001227(Sema6b),ENSMUSG00000001552(Jup),ENSMUSG00000001751(Naglu),ENSMUSG00000001761(Smo),ENSMUSG00000002068(Ccne1),ENSMUSG00000002083(Bbc3),ENSMUSG00000002274(M…
BP	GO:0043549	regulation of kinase activity	147	111	258	837	1.36549e-20	1.40493e-18	ENSMUSG00000000184(Ccnd2),ENSMUSG00000000441(Raf1),ENSMUSG00000001123(Lgals9),ENSMUSG00000002307(Daxx),ENSMUSG00000002413(Braf),ENSMUSG00000002602(Axl),ENSMUSG00000002699(Lcp2),ENSMUSG00000002997(Prkar2b),ENSMUSG00000003948(Mmd),ENSMUSG00000004221(Ikbkg),ENSMUSG00000004266(Ptpn6),ENSMUSG00000004296(Il12b),ENSMUSG00000004936(Map2k1),ENSMUSG00000006262(Mob1b),ENSMUSG00000007655(Cav1),ENSMUSG0000001…	ENSMUSG00000000869(Il4),ENSMUSG00000000881(Dlg3),ENSMUSG00000002068(Ccne1),ENSMUSG00000003518(Dusp3),ENSMUSG00000004530(Coro1c),ENSMUSG00000005583(Mef2c),ENSMUSG00000005718(Tfap4),ENSMUSG00000005958(Ephb3),ENSMUSG00000010047(Hyal2),ENSMUSG00000014361(Mertk),ENSMUSG00000014426(Map3k4),ENSMUSG00000016984(Etaa1),ENSMUSG00000018669(Cdk5rap3),ENSMUSG00000019876(Pkib),ENSMUSG00000019960(Dusp6),ENSMUSG0…
MF	GO:0032553	ribonucleotide binding	262	238	500	1923	1.64169e-20	1.67807e-18	ENSMUSG00000000409(Lck),ENSMUSG00000000441(Raf1),ENSMUSG00000000532(Acvr1b),ENSMUSG00000000628(Hk2),ENSMUSG00000001416(Cct3),ENSMUSG00000001473(Tubb6),ENSMUSG00000001630(Stk38l),ENSMUSG00000002227(Mov10),ENSMUSG00000002233(Rhoc),ENSMUSG00000002413(Braf),ENSMUSG00000002602(Axl),ENSMUSG00000002997(Prkar2b),ENSMUSG00000003283(Hck),ENSMUSG00000004591(Pkn2),ENSMUSG00000004936(Map2k1),ENSMUSG0000000674…	ENSMUSG00000000149(Gna12),ENSMUSG00000000631(Myo18a),ENSMUSG00000001755(Coasy),ENSMUSG00000002409(Dyrk1b),ENSMUSG00000002870(Mcm2),ENSMUSG00000003809(Gcdh),ENSMUSG00000004187(Kifc2),ENSMUSG00000004347(Pde1c),ENSMUSG00000004768(Rab23),ENSMUSG00000004798(Ulk2),ENSMUSG00000004933(Matk),ENSMUSG00000005102(Eif2ak4),ENSMUSG00000005370(Msh6),ENSMUSG00000005514(Por),ENSMUSG00000005580(Adcy9),ENSMUSG00000…
MF	GO:0032555	purine ribonucleotide binding	261	235	496	1905	1.78798e-20	1.81573e-18	ENSMUSG00000000409(Lck),ENSMUSG00000000441(Raf1),ENSMUSG00000000532(Acvr1b),ENSMUSG00000000628(Hk2),ENSMUSG00000001416(Cct3),ENSMUSG00000001473(Tubb6),ENSMUSG00000001630(Stk38l),ENSMUSG00000002227(Mov10),ENSMUSG00000002233(Rhoc),ENSMUSG00000002413(Braf),ENSMUSG00000002602(Axl),ENSMUSG00000002997(Prkar2b),ENSMUSG00000003283(Hck),ENSMUSG00000004591(Pkn2),ENSMUSG00000004936(Map2k1),ENSMUSG0000000674…	ENSMUSG00000000149(Gna12),ENSMUSG00000000631(Myo18a),ENSMUSG00000001755(Coasy),ENSMUSG00000002409(Dyrk1b),ENSMUSG00000002870(Mcm2),ENSMUSG00000003809(Gcdh),ENSMUSG00000004187(Kifc2),ENSMUSG00000004347(Pde1c),ENSMUSG00000004768(Rab23),ENSMUSG00000004798(Ulk2),ENSMUSG00000004933(Matk),ENSMUSG00000005102(Eif2ak4),ENSMUSG00000005370(Msh6),ENSMUSG00000005580(Adcy9),ENSMUSG00000005907(Pex1),ENSMUSG0000…
BP	GO:0002697	regulation of immune effector process	107	38	145	385	2.01867e-20	2.03678e-18	ENSMUSG00000001123(Lgals9),ENSMUSG00000004043(Stat5a),ENSMUSG00000004266(Ptpn6),ENSMUSG00000004296(Il12b),ENSMUSG00000004709(Cd244a),ENSMUSG00000005413(Hmox1),ENSMUSG00000006205(Htra1),ENSMUSG00000015316(Slamf1),ENSMUSG00000016529(Il10),ENSMUSG00000017631(Abr),ENSMUSG00000017652(Cd40),ENSMUSG00000017776(Crk),ENSMUSG00000017830(Dhx58),ENSMUSG00000018500(Adora2b),ENSMUSG00000018899(Irf1),ENSMUSG000…	ENSMUSG00000000631(Myo18a),ENSMUSG00000000693(Loxl3),ENSMUSG00000000869(Il4),ENSMUSG00000003882(Il7r),ENSMUSG00000005102(Eif2ak4),ENSMUSG00000006611(Hfe),ENSMUSG00000017550(Atad5),ENSMUSG00000018752(Tnfsfm13),ENSMUSG00000020101(Vsir),ENSMUSG00000020263(Appl2),ENSMUSG00000020399(Havcr2),ENSMUSG00000021253(Tgfb3),ENSMUSG00000022672(Prkdc),ENSMUSG00000024151(Msh2),ENSMUSG00000024349(Sting1),ENSMUSG0…
BP	GO:0010468	regulation of gene expression	603	463	1066	4736	2.53842e-20	2.54476e-18	ENSMUSG00000000078(Klf6),ENSMUSG00000000275(Trim25),ENSMUSG00000000317(Bcl6b),ENSMUSG00000000409(Lck),ENSMUSG00000000441(Raf1),ENSMUSG00000000532(Acvr1b),ENSMUSG00000000730(Dnmt3l),ENSMUSG00000000732(Icosl),ENSMUSG00000000776(Polr3d),ENSMUSG00000000838(Fmr1),ENSMUSG00000000957(Mmp14),ENSMUSG00000000982(Ccl3),ENSMUSG00000001123(Lgals9),ENSMUSG00000001288(Rarg),ENSMUSG00000001348(Acp5),ENSMUSG00000…	ENSMUSG00000000028(Cdc45),ENSMUSG00000000037(Scml2),ENSMUSG00000000282(Mnt),ENSMUSG00000000440(Pparg),ENSMUSG00000000693(Loxl3),ENSMUSG00000000869(Il4),ENSMUSG00000001228(Uhrf1),ENSMUSG00000001552(Jup),ENSMUSG00000001741(Il16),ENSMUSG00000001761(Smo),ENSMUSG00000002068(Ccne1),ENSMUSG00000002107(Celf2),ENSMUSG00000002409(Dyrk1b),ENSMUSG00000002486(Tchp),ENSMUSG00000002731(Prkra),ENSMUSG00000003282…
BP	GO:1902105	regulation of leukocyte differentiation	76	43	119	291	2.57099e-20	2.561e-18	ENSMUSG00000000409(Lck),ENSMUSG00000000957(Mmp14),ENSMUSG00000000982(Ccl3),ENSMUSG00000001123(Lgals9),ENSMUSG00000002413(Braf),ENSMUSG00000002602(Axl),ENSMUSG00000004043(Stat5a),ENSMUSG00000004266(Ptpn6),ENSMUSG00000004296(Il12b),ENSMUSG00000014599(Csf1),ENSMUSG00000015396(Cd83),ENSMUSG00000016529(Il10),ENSMUSG00000018899(Irf1),ENSMUSG00000019982(Myb),ENSMUSG00000021270(Hsp90aa1),ENSMUSG000000214…	ENSMUSG00000000693(Loxl3),ENSMUSG00000000869(Il4),ENSMUSG00000003882(Il7r),ENSMUSG00000017697(Ada),ENSMUSG00000019966(Kitl),ENSMUSG00000020101(Vsir),ENSMUSG00000020689(Itgb3),ENSMUSG00000021127(Zfp36l1),ENSMUSG00000021250(Fos),ENSMUSG00000022105(Rb1),ENSMUSG00000022672(Prkdc),ENSMUSG00000025880(Smad7),ENSMUSG00000026012(Cd28),ENSMUSG00000026288(Inpp5d),ENSMUSG00000026842(Abl1),ENSMUSG00000027239(…
MF	GO:0017076	purine nucleotide binding	261	237	498	1919	3.03069e-20	2.9998e-18	ENSMUSG00000000409(Lck),ENSMUSG00000000441(Raf1),ENSMUSG00000000532(Acvr1b),ENSMUSG00000000628(Hk2),ENSMUSG00000001416(Cct3),ENSMUSG00000001473(Tubb6),ENSMUSG00000001630(Stk38l),ENSMUSG00000002227(Mov10),ENSMUSG00000002233(Rhoc),ENSMUSG00000002413(Braf),ENSMUSG00000002602(Axl),ENSMUSG00000002997(Prkar2b),ENSMUSG00000003283(Hck),ENSMUSG00000004591(Pkn2),ENSMUSG00000004936(Map2k1),ENSMUSG0000000674…	ENSMUSG00000000149(Gna12),ENSMUSG00000000631(Myo18a),ENSMUSG00000001755(Coasy),ENSMUSG00000002409(Dyrk1b),ENSMUSG00000002870(Mcm2),ENSMUSG00000003809(Gcdh),ENSMUSG00000004187(Kifc2),ENSMUSG00000004347(Pde1c),ENSMUSG00000004768(Rab23),ENSMUSG00000004798(Ulk2),ENSMUSG00000004933(Matk),ENSMUSG00000005102(Eif2ak4),ENSMUSG00000005370(Msh6),ENSMUSG00000005580(Adcy9),ENSMUSG00000005907(Pex1),ENSMUSG0000…
BP	GO:0050778	positive regulation of immune response	125	47	172	490	3.1681e-20	3.1161e-18	ENSMUSG00000000409(Lck),ENSMUSG00000000732(Icosl),ENSMUSG00000000776(Polr3d),ENSMUSG00000001123(Lgals9),ENSMUSG00000002413(Braf),ENSMUSG00000002699(Lcp2),ENSMUSG00000003352(Cacnb3),ENSMUSG00000004043(Stat5a),ENSMUSG00000004266(Ptpn6),ENSMUSG00000004296(Il12b),ENSMUSG00000005057(Sh2b2),ENSMUSG00000005763(Cd247),ENSMUSG00000010358(Ifi35),ENSMUSG00000016496(Cd274),ENSMUSG00000016529(Il10),ENSMUSG000…	ENSMUSG00000000869(Il4),ENSMUSG00000003518(Dusp3),ENSMUSG00000005102(Eif2ak4),ENSMUSG00000005583(Mef2c),ENSMUSG00000016933(Plcg1),ENSMUSG00000017550(Atad5),ENSMUSG00000017697(Ada),ENSMUSG00000018752(Tnfsfm13),ENSMUSG00000020263(Appl2),ENSMUSG00000020399(Havcr2),ENSMUSG00000021699(Pde4d),ENSMUSG00000022471(Xrcc6),ENSMUSG00000022672(Prkdc),ENSMUSG00000023915(Tnfrsf21),ENSMUSG00000024151(Msh2),ENSMU…
BP	GO:0050867	positive regulation of cell activation	86	45	131	335	3.33565e-20	3.26039e-18	ENSMUSG00000000409(Lck),ENSMUSG00000000732(Icosl),ENSMUSG00000000957(Mmp14),ENSMUSG00000001123(Lgals9),ENSMUSG00000001300(Efnb2),ENSMUSG00000002602(Axl),ENSMUSG00000004043(Stat5a),ENSMUSG00000004296(Il12b),ENSMUSG00000004709(Cd244a),ENSMUSG00000007655(Cav1),ENSMUSG00000015316(Slamf1),ENSMUSG00000015396(Cd83),ENSMUSG00000016496(Cd274),ENSMUSG00000016529(Il10),ENSMUSG00000017652(Cd40),ENSMUSG000000…	ENSMUSG00000000869(Il4),ENSMUSG00000003882(Il7r),ENSMUSG00000005583(Mef2c),ENSMUSG00000017550(Atad5),ENSMUSG00000017697(Ada),ENSMUSG00000018752(Tnfsfm13),ENSMUSG00000020101(Vsir),ENSMUSG00000020399(Havcr2),ENSMUSG00000021756(Il6st),ENSMUSG00000022672(Prkdc),ENSMUSG00000024151(Msh2),ENSMUSG00000026012(Cd28),ENSMUSG00000026288(Inpp5d),ENSMUSG00000027239(Mdk),ENSMUSG00000027544(Nfatc2),ENSMUSG000000…
BP	GO:1901576	organic substance biosynthetic process	627	622	1249	5692	3.51659e-20	3.4159e-18	ENSMUSG00000000078(Klf6),ENSMUSG00000000275(Trim25),ENSMUSG00000000317(Bcl6b),ENSMUSG00000000441(Raf1),ENSMUSG00000000532(Acvr1b),ENSMUSG00000000730(Dnmt3l),ENSMUSG00000000776(Polr3d),ENSMUSG00000000838(Fmr1),ENSMUSG00000000982(Ccl3),ENSMUSG00000001056(Nhp2),ENSMUSG00000001288(Rarg),ENSMUSG00000001416(Cct3),ENSMUSG00000001467(Cyp51),ENSMUSG00000001542(Ell2),ENSMUSG00000001627(Ifrd1),ENSMUSG000000…	ENSMUSG00000000028(Cdc45),ENSMUSG00000000037(Scml2),ENSMUSG00000000282(Mnt),ENSMUSG00000000440(Pparg),ENSMUSG00000000693(Loxl3),ENSMUSG00000000751(Rpa1),ENSMUSG00000000869(Il4),ENSMUSG00000001228(Uhrf1),ENSMUSG00000001552(Jup),ENSMUSG00000001755(Coasy),ENSMUSG00000001761(Smo),ENSMUSG00000002068(Ccne1),ENSMUSG00000002409(Dyrk1b),ENSMUSG00000002486(Tchp),ENSMUSG00000002835(Chaf1a),ENSMUSG0000000287…
BP	GO:0007264	small GTPase mediated signal transduction	92	61	153	418	4.36446e-20	4.21332e-18	ENSMUSG00000001098(Kctd10),ENSMUSG00000001440(Kpnb1),ENSMUSG00000002233(Rhoc),ENSMUSG00000004936(Map2k1),ENSMUSG00000004952(Rasa4),ENSMUSG00000005057(Sh2b2),ENSMUSG00000005413(Hmox1),ENSMUSG00000009376(Met),ENSMUSG00000009630(Ppp2cb),ENSMUSG00000014599(Csf1),ENSMUSG00000017144(Rnd3),ENSMUSG00000017776(Crk),ENSMUSG00000018334(Ksr1),ENSMUSG00000020121(Srgap1),ENSMUSG00000020476(Dbnl),ENSMUSG0000002…	ENSMUSG00000000149(Gna12),ENSMUSG00000001995(Sipa1l2),ENSMUSG00000004099(Dnmt1),ENSMUSG00000004633(Chn2),ENSMUSG00000015766(Eps8),ENSMUSG00000017132(Cyth1),ENSMUSG00000017466(Timp2),ENSMUSG00000019478(Rab4a),ENSMUSG00000019852(Arfgef3),ENSMUSG00000019944(Rhobtb1),ENSMUSG00000019966(Kitl),ENSMUSG00000022075(Rhobtb2),ENSMUSG00000022105(Rb1),ENSMUSG00000022114(Spry2),ENSMUSG00000022469(Rapgef3),ENSM…
BP	GO:0006928	movement of cell or subcellular component	295	226	521	2038	6.5458e-20	6.28036e-18	ENSMUSG00000000532(Acvr1b),ENSMUSG00000000555(Itga5),ENSMUSG00000000957(Mmp14),ENSMUSG00000000982(Ccl3),ENSMUSG00000001123(Lgals9),ENSMUSG00000001300(Efnb2),ENSMUSG00000001435(Col18a1),ENSMUSG00000001440(Kpnb1),ENSMUSG00000002233(Rhoc),ENSMUSG00000002413(Braf),ENSMUSG00000002602(Axl),ENSMUSG00000002897(Il17ra),ENSMUSG00000003070(Efna2),ENSMUSG00000003665(Has1),ENSMUSG00000004040(Stat3),ENSMUSG000…	ENSMUSG00000000149(Gna12),ENSMUSG00000000440(Pparg),ENSMUSG00000000631(Myo18a),ENSMUSG00000000869(Il4),ENSMUSG00000001227(Sema6b),ENSMUSG00000001552(Jup),ENSMUSG00000001741(Il16),ENSMUSG00000001761(Smo),ENSMUSG00000002031(Ift46),ENSMUSG00000003452(Bicd1),ENSMUSG00000003518(Dusp3),ENSMUSG00000004151(Etv1),ENSMUSG00000004187(Kifc2),ENSMUSG00000004462(Tbccd1),ENSMUSG00000004530(Coro1c),ENSMUSG000000…
MF	GO:0035639	purine ribonucleoside triphosphate binding	252	225	477	1829	7.88709e-20	7.52111e-18	ENSMUSG00000000409(Lck),ENSMUSG00000000441(Raf1),ENSMUSG00000000532(Acvr1b),ENSMUSG00000000628(Hk2),ENSMUSG00000001416(Cct3),ENSMUSG00000001473(Tubb6),ENSMUSG00000001630(Stk38l),ENSMUSG00000002227(Mov10),ENSMUSG00000002233(Rhoc),ENSMUSG00000002413(Braf),ENSMUSG00000002602(Axl),ENSMUSG00000003283(Hck),ENSMUSG00000004591(Pkn2),ENSMUSG00000004936(Map2k1),ENSMUSG00000006740(Kif5b),ENSMUSG00000009376(…	ENSMUSG00000000149(Gna12),ENSMUSG00000000631(Myo18a),ENSMUSG00000001755(Coasy),ENSMUSG00000002409(Dyrk1b),ENSMUSG00000002870(Mcm2),ENSMUSG00000004187(Kifc2),ENSMUSG00000004768(Rab23),ENSMUSG00000004798(Ulk2),ENSMUSG00000004933(Matk),ENSMUSG00000005102(Eif2ak4),ENSMUSG00000005370(Msh6),ENSMUSG00000005580(Adcy9),ENSMUSG00000005907(Pex1),ENSMUSG00000005951(Shpk),ENSMUSG00000005958(Ephb3),ENSMUSG0000…
BP	GO:0002224	toll-like receptor signaling pathway	47	16	63	112	8.40732e-20	7.96861e-18	ENSMUSG00000001123(Lgals9),ENSMUSG00000007655(Cav1),ENSMUSG00000010358(Ifi35),ENSMUSG00000016528(Mapkapk2),ENSMUSG00000017652(Cd40),ENSMUSG00000018899(Irf1),ENSMUSG00000019850(Tnfaip3),ENSMUSG00000020134(Peli1),ENSMUSG00000020227(Irak3),ENSMUSG00000020400(Tnip1),ENSMUSG00000020641(Rsad2),ENSMUSG00000021025(Nfkbia),ENSMUSG00000021277(Traf3),ENSMUSG00000022892(App),ENSMUSG00000022901(Cd86),ENSMUSG0…	ENSMUSG00000019768(Esr1),ENSMUSG00000020263(Appl2),ENSMUSG00000020399(Havcr2),ENSMUSG00000020889(Nr1d1),ENSMUSG00000021356(Irf4),ENSMUSG00000027843(Ptpn22),ENSMUSG00000033777(Tlr13),ENSMUSG00000034652(Cd300a),ENSMUSG00000035900(Gramd4),ENSMUSG00000036103(Colec12),ENSMUSG00000039005(Tlr4),ENSMUSG00000047798(Cd300lf),ENSMUSG00000050132(Sarm1),ENSMUSG00000052688(Rab7b),ENSMUSG00000070056(Mfhas1),ENS…
BP	GO:0007159	leukocyte cell-cell adhesion	90	40	130	335	1.00573e-19	9.4751e-18	ENSMUSG00000000409(Lck),ENSMUSG00000000555(Itga5),ENSMUSG00000000732(Icosl),ENSMUSG00000001123(Lgals9),ENSMUSG00000001300(Efnb2),ENSMUSG00000004043(Stat5a),ENSMUSG00000004266(Ptpn6),ENSMUSG00000004296(Il12b),ENSMUSG00000004709(Cd244a),ENSMUSG00000005087(Cd44),ENSMUSG00000007655(Cav1),ENSMUSG00000015316(Slamf1),ENSMUSG00000015396(Cd83),ENSMUSG00000016496(Cd274),ENSMUSG00000017009(Sdc4),ENSMUSG0000…	ENSMUSG00000000693(Loxl3),ENSMUSG00000000869(Il4),ENSMUSG00000003518(Dusp3),ENSMUSG00000003882(Il7r),ENSMUSG00000006611(Hfe),ENSMUSG00000013707(Tnfaip8l2),ENSMUSG00000017697(Ada),ENSMUSG00000020101(Vsir),ENSMUSG00000020399(Havcr2),ENSMUSG00000021756(Il6st),ENSMUSG00000022367(Has2),ENSMUSG00000023915(Tnfrsf21),ENSMUSG00000025880(Smad7),ENSMUSG00000026012(Cd28),ENSMUSG00000027239(Mdk),ENSMUSG000000…
BP	GO:0045859	regulation of protein kinase activity	136	95	231	735	1.12392e-19	1.05251e-17	ENSMUSG00000000184(Ccnd2),ENSMUSG00000000441(Raf1),ENSMUSG00000001123(Lgals9),ENSMUSG00000002307(Daxx),ENSMUSG00000002413(Braf),ENSMUSG00000002699(Lcp2),ENSMUSG00000002997(Prkar2b),ENSMUSG00000003948(Mmd),ENSMUSG00000004221(Ikbkg),ENSMUSG00000004266(Ptpn6),ENSMUSG00000004296(Il12b),ENSMUSG00000004936(Map2k1),ENSMUSG00000007655(Cav1),ENSMUSG00000012519(Mlkl),ENSMUSG00000014599(Csf1),ENSMUSG0000001…	ENSMUSG00000000869(Il4),ENSMUSG00000000881(Dlg3),ENSMUSG00000002068(Ccne1),ENSMUSG00000003518(Dusp3),ENSMUSG00000004530(Coro1c),ENSMUSG00000005583(Mef2c),ENSMUSG00000005718(Tfap4),ENSMUSG00000010047(Hyal2),ENSMUSG00000014426(Map3k4),ENSMUSG00000016984(Etaa1),ENSMUSG00000018669(Cdk5rap3),ENSMUSG00000019876(Pkib),ENSMUSG00000019960(Dusp6),ENSMUSG00000019966(Kitl),ENSMUSG00000020189(Osbpl8),ENSMUSG0…
BP	GO:0034341	response to interferon-gamma	66	8	74	145	1.13447e-19	1.05607e-17	ENSMUSG00000000982(Ccl3),ENSMUSG00000004296(Il12b),ENSMUSG00000006740(Kif5b),ENSMUSG00000017652(Cd40),ENSMUSG00000018899(Irf1),ENSMUSG00000018920(Cxcl16),ENSMUSG00000018930(Ccl4),ENSMUSG00000019122(Ccl9),ENSMUSG00000019471(Cdc37),ENSMUSG00000020826(Nos2),ENSMUSG00000021367(Edn1),ENSMUSG00000022346(Myc),ENSMUSG00000022504(Ciita),ENSMUSG00000022534(Mefv),ENSMUSG00000022906(Parp9),ENSMUSG00000023460…	ENSMUSG00000000440(Pparg),ENSMUSG00000000631(Myo18a),ENSMUSG00000020546(Stxbp4),ENSMUSG00000031988(Vps26b),ENSMUSG00000039005(Tlr4),ENSMUSG00000041515(Irf8),ENSMUSG00000051343(Rab11fip5),ENSMUSG00000052688(Rab7b)
BP	GO:0071219	cellular response to molecule of bacterial origin	83	16	99	226	1.24086e-19	1.14827e-17	ENSMUSG00000000982(Ccl3),ENSMUSG00000002602(Axl),ENSMUSG00000004296(Il12b),ENSMUSG00000016496(Cd274),ENSMUSG00000016529(Il10),ENSMUSG00000017652(Cd40),ENSMUSG00000018920(Cxcl16),ENSMUSG00000019850(Tnfaip3),ENSMUSG00000020638(Cmpk2),ENSMUSG00000020826(Nos2),ENSMUSG00000021025(Nfkbia),ENSMUSG00000021936(Mapk8),ENSMUSG00000022122(Ednrb),ENSMUSG00000022126(Acod1),ENSMUSG00000022255(Mtdh),ENSMUSG00000…	ENSMUSG00000005583(Mef2c),ENSMUSG00000005951(Shpk),ENSMUSG00000008855(Hdac5),ENSMUSG00000020399(Havcr2),ENSMUSG00000020889(Nr1d1),ENSMUSG00000021699(Pde4d),ENSMUSG00000024975(Pdcd4),ENSMUSG00000026842(Abl1),ENSMUSG00000027843(Ptpn22),ENSMUSG00000032377(Plscr4),ENSMUSG00000034610(Tut4),ENSMUSG00000038481(Cdk19),ENSMUSG00000039005(Tlr4),ENSMUSG00000041515(Irf8),ENSMUSG00000056019(Zfp709),ENSMUSG000…
MF	GO:0036094	small molecule binding	314	322	636	2593	1.36962e-19	1.25997e-17	ENSMUSG00000000409(Lck),ENSMUSG00000000441(Raf1),ENSMUSG00000000532(Acvr1b),ENSMUSG00000000628(Hk2),ENSMUSG00000001248(Gramd1a),ENSMUSG00000001416(Cct3),ENSMUSG00000001473(Tubb6),ENSMUSG00000001630(Stk38l),ENSMUSG00000002227(Mov10),ENSMUSG00000002233(Rhoc),ENSMUSG00000002413(Braf),ENSMUSG00000002602(Axl),ENSMUSG00000002997(Prkar2b),ENSMUSG00000003283(Hck),ENSMUSG00000004591(Pkn2),ENSMUSG000000049…	ENSMUSG00000000149(Gna12),ENSMUSG00000000631(Myo18a),ENSMUSG00000001143(Lman2l),ENSMUSG00000001228(Uhrf1),ENSMUSG00000001755(Coasy),ENSMUSG00000002409(Dyrk1b),ENSMUSG00000002870(Mcm2),ENSMUSG00000003153(Slc2a3),ENSMUSG00000003809(Gcdh),ENSMUSG00000004099(Dnmt1),ENSMUSG00000004187(Kifc2),ENSMUSG00000004347(Pde1c),ENSMUSG00000004768(Rab23),ENSMUSG00000004798(Ulk2),ENSMUSG00000004933(Matk),ENSMUSG00…
BP	GO:0051128	regulation of cellular component organization	333	270	603	2438	1.41949e-19	1.29821e-17	ENSMUSG00000000441(Raf1),ENSMUSG00000000532(Acvr1b),ENSMUSG00000000628(Hk2),ENSMUSG00000000915(Hip1r),ENSMUSG00000000957(Mmp14),ENSMUSG00000001052(Sec24b),ENSMUSG00000001175(Calm1),ENSMUSG00000001300(Efnb2),ENSMUSG00000001416(Cct3),ENSMUSG00000001627(Ifrd1),ENSMUSG00000001630(Stk38l),ENSMUSG00000002111(Spi1),ENSMUSG00000002227(Mov10),ENSMUSG00000002233(Rhoc),ENSMUSG00000002413(Braf),ENSMUSG000000…	ENSMUSG00000000028(Cdc45),ENSMUSG00000000440(Pparg),ENSMUSG00000000869(Il4),ENSMUSG00000001227(Sema6b),ENSMUSG00000001482(Def8),ENSMUSG00000002031(Ift46),ENSMUSG00000002055(Spag5),ENSMUSG00000002083(Bbc3),ENSMUSG00000002104(Rapsn),ENSMUSG00000002274(Metrn),ENSMUSG00000002486(Tchp),ENSMUSG00000002870(Mcm2),ENSMUSG00000003378(Grik5),ENSMUSG00000003452(Bicd1),ENSMUSG00000003518(Dusp3),ENSMUSG0000000…
BP	GO:0051345	positive regulation of hydrolase activity	136	85	221	695	1.5318e-19	1.39278e-17	ENSMUSG00000000409(Lck),ENSMUSG00000000915(Hip1r),ENSMUSG00000000982(Ccl3),ENSMUSG00000001175(Calm1),ENSMUSG00000002233(Rhoc),ENSMUSG00000004040(Stat3),ENSMUSG00000004446(Bid),ENSMUSG00000004936(Map2k1),ENSMUSG00000004952(Rasa4),ENSMUSG00000005732(Ranbp1),ENSMUSG00000007655(Cav1),ENSMUSG00000011305(Plin5),ENSMUSG00000015957(Wnt11),ENSMUSG00000017631(Abr),ENSMUSG00000017652(Cd40),ENSMUSG0000001777…	ENSMUSG00000000440(Pparg),ENSMUSG00000001995(Sipa1l2),ENSMUSG00000002083(Bbc3),ENSMUSG00000003134(Tbc1d8),ENSMUSG00000004530(Coro1c),ENSMUSG00000004633(Chn2),ENSMUSG00000005370(Msh6),ENSMUSG00000005583(Mef2c),ENSMUSG00000005718(Tfap4),ENSMUSG00000019478(Rab4a),ENSMUSG00000019768(Esr1),ENSMUSG00000019790(Stxbp5),ENSMUSG00000020101(Vsir),ENSMUSG00000020888(Dvl2),ENSMUSG00000021368(Tbc1d7),ENSMUSG00…
BP	GO:0051249	regulation of lymphocyte activation	92	60	152	420	1.99407e-19	1.80262e-17	ENSMUSG00000000409(Lck),ENSMUSG00000000732(Icosl),ENSMUSG00000000957(Mmp14),ENSMUSG00000001123(Lgals9),ENSMUSG00000001300(Efnb2),ENSMUSG00000002413(Braf),ENSMUSG00000002602(Axl),ENSMUSG00000004043(Stat5a),ENSMUSG00000004266(Ptpn6),ENSMUSG00000004296(Il12b),ENSMUSG00000004709(Cd244a),ENSMUSG00000007655(Cav1),ENSMUSG00000015316(Slamf1),ENSMUSG00000015396(Cd83),ENSMUSG00000016496(Cd274),ENSMUSG00000…	ENSMUSG00000000693(Loxl3),ENSMUSG00000000869(Il4),ENSMUSG00000003518(Dusp3),ENSMUSG00000003882(Il7r),ENSMUSG00000005583(Mef2c),ENSMUSG00000006611(Hfe),ENSMUSG00000013707(Tnfaip8l2),ENSMUSG00000014361(Mertk),ENSMUSG00000017550(Atad5),ENSMUSG00000017697(Ada),ENSMUSG00000018752(Tnfsfm13),ENSMUSG00000020101(Vsir),ENSMUSG00000020399(Havcr2),ENSMUSG00000021127(Zfp36l1),ENSMUSG00000021756(Il6st),ENSMUSG…
BP	GO:0048870	cell motility	259	171	430	1623	2.42125e-19	2.16377e-17	ENSMUSG00000000532(Acvr1b),ENSMUSG00000000555(Itga5),ENSMUSG00000000957(Mmp14),ENSMUSG00000000982(Ccl3),ENSMUSG00000001123(Lgals9),ENSMUSG00000001300(Efnb2),ENSMUSG00000001435(Col18a1),ENSMUSG00000002233(Rhoc),ENSMUSG00000002413(Braf),ENSMUSG00000002602(Axl),ENSMUSG00000002897(Il17ra),ENSMUSG00000003665(Has1),ENSMUSG00000004040(Stat3),ENSMUSG00000004043(Stat5a),ENSMUSG00000004044(Cavin1),ENSMUSG0…	ENSMUSG00000000149(Gna12),ENSMUSG00000000440(Pparg),ENSMUSG00000000631(Myo18a),ENSMUSG00000000869(Il4),ENSMUSG00000001227(Sema6b),ENSMUSG00000001552(Jup),ENSMUSG00000001741(Il16),ENSMUSG00000001761(Smo),ENSMUSG00000002031(Ift46),ENSMUSG00000003518(Dusp3),ENSMUSG00000004462(Tbccd1),ENSMUSG00000004530(Coro1c),ENSMUSG00000004698(Hdac9),ENSMUSG00000005583(Mef2c),ENSMUSG00000005958(Ephb3),ENSMUSG00000…
BP	GO:0051674	localization of cell	259	171	430	1623	2.42125e-19	2.16377e-17	ENSMUSG00000000532(Acvr1b),ENSMUSG00000000555(Itga5),ENSMUSG00000000957(Mmp14),ENSMUSG00000000982(Ccl3),ENSMUSG00000001123(Lgals9),ENSMUSG00000001300(Efnb2),ENSMUSG00000001435(Col18a1),ENSMUSG00000002233(Rhoc),ENSMUSG00000002413(Braf),ENSMUSG00000002602(Axl),ENSMUSG00000002897(Il17ra),ENSMUSG00000003665(Has1),ENSMUSG00000004040(Stat3),ENSMUSG00000004043(Stat5a),ENSMUSG00000004044(Cavin1),ENSMUSG0…	ENSMUSG00000000149(Gna12),ENSMUSG00000000440(Pparg),ENSMUSG00000000631(Myo18a),ENSMUSG00000000869(Il4),ENSMUSG00000001227(Sema6b),ENSMUSG00000001552(Jup),ENSMUSG00000001741(Il16),ENSMUSG00000001761(Smo),ENSMUSG00000002031(Ift46),ENSMUSG00000003518(Dusp3),ENSMUSG00000004462(Tbccd1),ENSMUSG00000004530(Coro1c),ENSMUSG00000004698(Hdac9),ENSMUSG00000005583(Mef2c),ENSMUSG00000005958(Ephb3),ENSMUSG00000…
BP	GO:0002696	positive regulation of leukocyte activation	81	44	125	320	2.71201e-19	2.40984e-17	ENSMUSG00000000409(Lck),ENSMUSG00000000732(Icosl),ENSMUSG00000000957(Mmp14),ENSMUSG00000001123(Lgals9),ENSMUSG00000001300(Efnb2),ENSMUSG00000002602(Axl),ENSMUSG00000004043(Stat5a),ENSMUSG00000004296(Il12b),ENSMUSG00000004709(Cd244a),ENSMUSG00000007655(Cav1),ENSMUSG00000015316(Slamf1),ENSMUSG00000015396(Cd83),ENSMUSG00000016496(Cd274),ENSMUSG00000016529(Il10),ENSMUSG00000017652(Cd40),ENSMUSG000000…	ENSMUSG00000000869(Il4),ENSMUSG00000003882(Il7r),ENSMUSG00000005583(Mef2c),ENSMUSG00000017550(Atad5),ENSMUSG00000017697(Ada),ENSMUSG00000018752(Tnfsfm13),ENSMUSG00000020101(Vsir),ENSMUSG00000020399(Havcr2),ENSMUSG00000021756(Il6st),ENSMUSG00000022672(Prkdc),ENSMUSG00000024151(Msh2),ENSMUSG00000026012(Cd28),ENSMUSG00000026288(Inpp5d),ENSMUSG00000027239(Mdk),ENSMUSG00000027544(Nfatc2),ENSMUSG000000…
BP	GO:0010562	positive regulation of phosphorus metabolic process	204	123	327	1156	2.87369e-19	2.52481e-17	ENSMUSG00000000184(Ccnd2),ENSMUSG00000000409(Lck),ENSMUSG00000000441(Raf1),ENSMUSG00000000532(Acvr1b),ENSMUSG00000000555(Itga5),ENSMUSG00000000982(Ccl3),ENSMUSG00000001123(Lgals9),ENSMUSG00000001175(Calm1),ENSMUSG00000002307(Daxx),ENSMUSG00000002413(Braf),ENSMUSG00000002602(Axl),ENSMUSG00000002699(Lcp2),ENSMUSG00000003948(Mmd),ENSMUSG00000004040(Stat3),ENSMUSG00000004221(Ikbkg),ENSMUSG00000004296…	ENSMUSG00000000869(Il4),ENSMUSG00000000881(Dlg3),ENSMUSG00000005102(Eif2ak4),ENSMUSG00000005583(Mef2c),ENSMUSG00000005958(Ephb3),ENSMUSG00000006235(Epor),ENSMUSG00000006611(Hfe),ENSMUSG00000013483(Card14),ENSMUSG00000014158(Trpv4),ENSMUSG00000014361(Mertk),ENSMUSG00000014426(Map3k4),ENSMUSG00000014592(Camta1),ENSMUSG00000016984(Etaa1),ENSMUSG00000017466(Timp2),ENSMUSG00000018849(Wwc1),ENSMUSG0000…
BP	GO:0045937	positive regulation of phosphate metabolic process	204	123	327	1156	2.87369e-19	2.52481e-17	ENSMUSG00000000184(Ccnd2),ENSMUSG00000000409(Lck),ENSMUSG00000000441(Raf1),ENSMUSG00000000532(Acvr1b),ENSMUSG00000000555(Itga5),ENSMUSG00000000982(Ccl3),ENSMUSG00000001123(Lgals9),ENSMUSG00000001175(Calm1),ENSMUSG00000002307(Daxx),ENSMUSG00000002413(Braf),ENSMUSG00000002602(Axl),ENSMUSG00000002699(Lcp2),ENSMUSG00000003948(Mmd),ENSMUSG00000004040(Stat3),ENSMUSG00000004221(Ikbkg),ENSMUSG00000004296…	ENSMUSG00000000869(Il4),ENSMUSG00000000881(Dlg3),ENSMUSG00000005102(Eif2ak4),ENSMUSG00000005583(Mef2c),ENSMUSG00000005958(Ephb3),ENSMUSG00000006235(Epor),ENSMUSG00000006611(Hfe),ENSMUSG00000013483(Card14),ENSMUSG00000014158(Trpv4),ENSMUSG00000014361(Mertk),ENSMUSG00000014426(Map3k4),ENSMUSG00000014592(Camta1),ENSMUSG00000016984(Etaa1),ENSMUSG00000017466(Timp2),ENSMUSG00000018849(Wwc1),ENSMUSG0000…
MF	GO:0019900	kinase binding	145	105	250	820	3.55635e-19	3.10714e-17	ENSMUSG00000000184(Ccnd2),ENSMUSG00000000409(Lck),ENSMUSG00000000441(Raf1),ENSMUSG00000001175(Calm1),ENSMUSG00000002233(Rhoc),ENSMUSG00000002307(Daxx),ENSMUSG00000002413(Braf),ENSMUSG00000002983(Relb),ENSMUSG00000002997(Prkar2b),ENSMUSG00000003352(Cacnb3),ENSMUSG00000004040(Stat3),ENSMUSG00000004266(Ptpn6),ENSMUSG00000004936(Map2k1),ENSMUSG00000005057(Sh2b2),ENSMUSG00000005763(Cd247),ENSMUSG00000…	ENSMUSG00000000881(Dlg3),ENSMUSG00000001552(Jup),ENSMUSG00000002068(Ccne1),ENSMUSG00000002731(Prkra),ENSMUSG00000003153(Slc2a3),ENSMUSG00000003452(Bicd1),ENSMUSG00000003518(Dusp3),ENSMUSG00000004698(Hdac9),ENSMUSG00000005198(Polr2a),ENSMUSG00000005374(Tbl2),ENSMUSG00000005699(Pard6a),ENSMUSG00000006678(Pola1),ENSMUSG00000008855(Hdac5),ENSMUSG00000009090(Ap1b1),ENSMUSG00000010047(Hyal2),ENSMUSG000…
BP	GO:0042110	T cell activation	109	61	170	493	4.12807e-19	3.5866e-17	ENSMUSG00000000409(Lck),ENSMUSG00000000732(Icosl),ENSMUSG00000001123(Lgals9),ENSMUSG00000001300(Efnb2),ENSMUSG00000002413(Braf),ENSMUSG00000002983(Relb),ENSMUSG00000003206(Ebi3),ENSMUSG00000004040(Stat3),ENSMUSG00000004043(Stat5a),ENSMUSG00000004266(Ptpn6),ENSMUSG00000004296(Il12b),ENSMUSG00000004709(Cd244a),ENSMUSG00000005087(Cd44),ENSMUSG00000006705(Pknox1),ENSMUSG00000007655(Cav1),ENSMUSG00000…	ENSMUSG00000000693(Loxl3),ENSMUSG00000000869(Il4),ENSMUSG00000003518(Dusp3),ENSMUSG00000003882(Il7r),ENSMUSG00000005102(Eif2ak4),ENSMUSG00000006611(Hfe),ENSMUSG00000013707(Tnfaip8l2),ENSMUSG00000017697(Ada),ENSMUSG00000020101(Vsir),ENSMUSG00000020399(Havcr2),ENSMUSG00000020453(Patz1),ENSMUSG00000020605(Hs1bp3),ENSMUSG00000021127(Zfp36l1),ENSMUSG00000021356(Irf4),ENSMUSG00000021756(Il6st),ENSMUSG0…
BP	GO:0019221	cytokine-mediated signaling pathway	119	29	148	408	4.69227e-19	4.05428e-17	ENSMUSG00000000982(Ccl3),ENSMUSG00000002111(Spi1),ENSMUSG00000002602(Axl),ENSMUSG00000002897(Il17ra),ENSMUSG00000003206(Ebi3),ENSMUSG00000004040(Stat3),ENSMUSG00000004043(Stat5a),ENSMUSG00000004266(Ptpn6),ENSMUSG00000004296(Il12b),ENSMUSG00000005057(Sh2b2),ENSMUSG00000005087(Cd44),ENSMUSG00000007655(Cav1),ENSMUSG00000014599(Csf1),ENSMUSG00000017057(Il13ra1),ENSMUSG00000018796(Acsl1),ENSMUSG000000…	ENSMUSG00000000440(Pparg),ENSMUSG00000003882(Il7r),ENSMUSG00000004071(Cdip1),ENSMUSG00000006235(Epor),ENSMUSG00000013483(Card14),ENSMUSG00000020263(Appl2),ENSMUSG00000021756(Il6st),ENSMUSG00000023826(Prkn),ENSMUSG00000025235(Bbs4),ENSMUSG00000026271(Gpr35),ENSMUSG00000027947(Il6ra),ENSMUSG00000028101(Pias3),ENSMUSG00000028927(Padi2),ENSMUSG00000031451(Gas6),ENSMUSG00000031714(Gab1),ENSMUSG0000003…
BP	GO:0007249	I-kappaB kinase/NF-kappaB signaling	79	19	98	227	6.55704e-19	5.63437e-17	ENSMUSG00000000275(Trim25),ENSMUSG00000002983(Relb),ENSMUSG00000004221(Ikbkg),ENSMUSG00000015755(Tab2),ENSMUSG00000015837(Sqstm1),ENSMUSG00000017652(Cd40),ENSMUSG00000018899(Irf1),ENSMUSG00000019842(Traf3ip2),ENSMUSG00000019850(Tnfaip3),ENSMUSG00000020075(Ddx21),ENSMUSG00000020115(Tbk1),ENSMUSG00000020134(Peli1),ENSMUSG00000020275(Rel),ENSMUSG00000020400(Tnip1),ENSMUSG00000020580(Rock2),ENSMUSG00…	ENSMUSG00000005150(Wdr83),ENSMUSG00000008305(Tle1),ENSMUSG00000019768(Esr1),ENSMUSG00000020889(Nr1d1),ENSMUSG00000023826(Prkn),ENSMUSG00000025507(Pidd1),ENSMUSG00000025736(Jmjd8),ENSMUSG00000026228(Htr2b),ENSMUSG00000026842(Abl1),ENSMUSG00000028756(Pink1),ENSMUSG00000029204(Rhoh),ENSMUSG00000032109(Nlrx1),ENSMUSG00000032238(Rora),ENSMUSG00000032251(Irak1bp1),ENSMUSG00000036526(Card11),ENSMUSG0000…
BP	GO:0044249	cellular biosynthetic process	617	614	1231	5641	6.83368e-19	5.84e-17	ENSMUSG00000000078(Klf6),ENSMUSG00000000275(Trim25),ENSMUSG00000000317(Bcl6b),ENSMUSG00000000441(Raf1),ENSMUSG00000000532(Acvr1b),ENSMUSG00000000730(Dnmt3l),ENSMUSG00000000776(Polr3d),ENSMUSG00000000838(Fmr1),ENSMUSG00000000982(Ccl3),ENSMUSG00000001056(Nhp2),ENSMUSG00000001288(Rarg),ENSMUSG00000001348(Acp5),ENSMUSG00000001416(Cct3),ENSMUSG00000001542(Ell2),ENSMUSG00000001627(Ifrd1),ENSMUSG0000000…	ENSMUSG00000000028(Cdc45),ENSMUSG00000000037(Scml2),ENSMUSG00000000282(Mnt),ENSMUSG00000000440(Pparg),ENSMUSG00000000693(Loxl3),ENSMUSG00000000751(Rpa1),ENSMUSG00000000869(Il4),ENSMUSG00000001228(Uhrf1),ENSMUSG00000001552(Jup),ENSMUSG00000001755(Coasy),ENSMUSG00000001761(Smo),ENSMUSG00000002068(Ccne1),ENSMUSG00000002409(Dyrk1b),ENSMUSG00000002486(Tchp),ENSMUSG00000002835(Chaf1a),ENSMUSG0000000287…
BP	GO:0033993	response to lipid	196	87	283	969	8.19425e-19	6.96467e-17	ENSMUSG00000000275(Trim25),ENSMUSG00000000982(Ccl3),ENSMUSG00000001123(Lgals9),ENSMUSG00000001175(Calm1),ENSMUSG00000001248(Gramd1a),ENSMUSG00000001288(Rarg),ENSMUSG00000001348(Acp5),ENSMUSG00000002307(Daxx),ENSMUSG00000002602(Axl),ENSMUSG00000003849(Nqo1),ENSMUSG00000004040(Stat3),ENSMUSG00000004296(Il12b),ENSMUSG00000004446(Bid),ENSMUSG00000004936(Map2k1),ENSMUSG00000005732(Ranbp1),ENSMUSG00000…	ENSMUSG00000000326(Comt),ENSMUSG00000000440(Pparg),ENSMUSG00000001761(Smo),ENSMUSG00000005150(Wdr83),ENSMUSG00000005583(Mef2c),ENSMUSG00000005718(Tfap4),ENSMUSG00000005951(Shpk),ENSMUSG00000008855(Hdac5),ENSMUSG00000010663(Fads1),ENSMUSG00000015846(Rxra),ENSMUSG00000017146(Brca1),ENSMUSG00000019768(Esr1),ENSMUSG00000020027(Socs2),ENSMUSG00000020399(Havcr2),ENSMUSG00000020647(Ncoa1),ENSMUSG0000002…
CC	GO:0043228	non-membrane-bounded organelle	521	561	1082	4872	8.64802e-19	7.31062e-17	ENSMUSG00000000078(Klf6),ENSMUSG00000000184(Ccnd2),ENSMUSG00000000275(Trim25),ENSMUSG00000000409(Lck),ENSMUSG00000000628(Hk2),ENSMUSG00000000730(Dnmt3l),ENSMUSG00000000732(Icosl),ENSMUSG00000000838(Fmr1),ENSMUSG00000000915(Hip1r),ENSMUSG00000000957(Mmp14),ENSMUSG00000001056(Nhp2),ENSMUSG00000001175(Calm1),ENSMUSG00000001288(Rarg),ENSMUSG00000001416(Cct3),ENSMUSG00000001440(Kpnb1),ENSMUSG000000014…	ENSMUSG00000000028(Cdc45),ENSMUSG00000000037(Scml2),ENSMUSG00000000056(Narf),ENSMUSG00000000282(Mnt),ENSMUSG00000000631(Myo18a),ENSMUSG00000000751(Rpa1),ENSMUSG00000000881(Dlg3),ENSMUSG00000001228(Uhrf1),ENSMUSG00000001552(Jup),ENSMUSG00000002031(Ift46),ENSMUSG00000002055(Spag5),ENSMUSG00000002068(Ccne1),ENSMUSG00000002104(Rapsn),ENSMUSG00000002257(Def6),ENSMUSG00000002409(Dyrk1b),ENSMUSG00000002…
BP	GO:0022407	regulation of cell-cell adhesion	102	46	148	411	1.01463e-18	8.53105e-17	ENSMUSG00000000409(Lck),ENSMUSG00000000732(Icosl),ENSMUSG00000001123(Lgals9),ENSMUSG00000001300(Efnb2),ENSMUSG00000004043(Stat5a),ENSMUSG00000004266(Ptpn6),ENSMUSG00000004296(Il12b),ENSMUSG00000004709(Cd244a),ENSMUSG00000004936(Map2k1),ENSMUSG00000005087(Cd44),ENSMUSG00000007655(Cav1),ENSMUSG00000015316(Slamf1),ENSMUSG00000015396(Cd83),ENSMUSG00000016496(Cd274),ENSMUSG00000016529(Il10),ENSMUSG000…	ENSMUSG00000000693(Loxl3),ENSMUSG00000000869(Il4),ENSMUSG00000003518(Dusp3),ENSMUSG00000003882(Il7r),ENSMUSG00000005958(Ephb3),ENSMUSG00000006611(Hfe),ENSMUSG00000013707(Tnfaip8l2),ENSMUSG00000014158(Trpv4),ENSMUSG00000017697(Ada),ENSMUSG00000020101(Vsir),ENSMUSG00000020399(Havcr2),ENSMUSG00000021756(Il6st),ENSMUSG00000022367(Has2),ENSMUSG00000023915(Tnfrsf21),ENSMUSG00000025880(Smad7),ENSMUSG000…
BP	GO:0031401	positive regulation of protein modification process	212	132	344	1242	1.13801e-18	9.51727e-17	ENSMUSG00000000184(Ccnd2),ENSMUSG00000000409(Lck),ENSMUSG00000000441(Raf1),ENSMUSG00000000532(Acvr1b),ENSMUSG00000000555(Itga5),ENSMUSG00000000982(Ccl3),ENSMUSG00000001123(Lgals9),ENSMUSG00000001175(Calm1),ENSMUSG00000002307(Daxx),ENSMUSG00000002413(Braf),ENSMUSG00000002699(Lcp2),ENSMUSG00000003948(Mmd),ENSMUSG00000004221(Ikbkg),ENSMUSG00000004296(Il12b),ENSMUSG00000004936(Map2k1),ENSMUSG00000005…	ENSMUSG00000000869(Il4),ENSMUSG00000000881(Dlg3),ENSMUSG00000004099(Dnmt1),ENSMUSG00000005102(Eif2ak4),ENSMUSG00000005583(Mef2c),ENSMUSG00000006235(Epor),ENSMUSG00000006611(Hfe),ENSMUSG00000013483(Card14),ENSMUSG00000014158(Trpv4),ENSMUSG00000014426(Map3k4),ENSMUSG00000014592(Camta1),ENSMUSG00000016984(Etaa1),ENSMUSG00000017146(Brca1),ENSMUSG00000017466(Timp2),ENSMUSG00000018651(Tada2a),ENSMUSG00…
MF	GO:1901363	heterocyclic compound binding	620	595	1215	5557	1.23262e-18	1.02537e-16	ENSMUSG00000000078(Klf6),ENSMUSG00000000317(Bcl6b),ENSMUSG00000000409(Lck),ENSMUSG00000000441(Raf1),ENSMUSG00000000532(Acvr1b),ENSMUSG00000000628(Hk2),ENSMUSG00000000776(Polr3d),ENSMUSG00000000838(Fmr1),ENSMUSG00000001056(Nhp2),ENSMUSG00000001288(Rarg),ENSMUSG00000001416(Cct3),ENSMUSG00000001467(Cyp51),ENSMUSG00000001473(Tubb6),ENSMUSG00000001630(Stk38l),ENSMUSG00000001632(Brpf1),ENSMUSG000000021…	ENSMUSG00000000028(Cdc45),ENSMUSG00000000149(Gna12),ENSMUSG00000000282(Mnt),ENSMUSG00000000440(Pparg),ENSMUSG00000000631(Myo18a),ENSMUSG00000000751(Rpa1),ENSMUSG00000001228(Uhrf1),ENSMUSG00000001755(Coasy),ENSMUSG00000002107(Celf2),ENSMUSG00000002109(Ddb2),ENSMUSG00000002409(Dyrk1b),ENSMUSG00000002486(Tchp),ENSMUSG00000002731(Prkra),ENSMUSG00000002870(Mcm2),ENSMUSG00000003282(Plag1),ENSMUSG000000…
BP	GO:0042327	positive regulation of phosphorylation	190	118	308	1082	1.2931e-18	1.06999e-16	ENSMUSG00000000184(Ccnd2),ENSMUSG00000000409(Lck),ENSMUSG00000000441(Raf1),ENSMUSG00000000532(Acvr1b),ENSMUSG00000000555(Itga5),ENSMUSG00000000982(Ccl3),ENSMUSG00000001123(Lgals9),ENSMUSG00000002307(Daxx),ENSMUSG00000002413(Braf),ENSMUSG00000002602(Axl),ENSMUSG00000002699(Lcp2),ENSMUSG00000003948(Mmd),ENSMUSG00000004221(Ikbkg),ENSMUSG00000004296(Il12b),ENSMUSG00000004936(Map2k1),ENSMUSG0000000508…	ENSMUSG00000000869(Il4),ENSMUSG00000000881(Dlg3),ENSMUSG00000005102(Eif2ak4),ENSMUSG00000005583(Mef2c),ENSMUSG00000005958(Ephb3),ENSMUSG00000006235(Epor),ENSMUSG00000006611(Hfe),ENSMUSG00000013483(Card14),ENSMUSG00000014158(Trpv4),ENSMUSG00000014361(Mertk),ENSMUSG00000014426(Map3k4),ENSMUSG00000016984(Etaa1),ENSMUSG00000017466(Timp2),ENSMUSG00000018849(Wwc1),ENSMUSG00000019768(Esr1),ENSMUSG000000…
BP	GO:0002274	myeloid leukocyte activation	73	23	96	222	1.30175e-18	1.07148e-16	ENSMUSG00000000982(Ccl3),ENSMUSG00000001123(Lgals9),ENSMUSG00000002111(Spi1),ENSMUSG00000002699(Lcp2),ENSMUSG00000002983(Relb),ENSMUSG00000004709(Cd244a),ENSMUSG00000005413(Hmox1),ENSMUSG00000010358(Ifi35),ENSMUSG00000015316(Slamf1),ENSMUSG00000016529(Il10),ENSMUSG00000017631(Abr),ENSMUSG00000018500(Adora2b),ENSMUSG00000018916(Csf2),ENSMUSG00000020572(Nampt),ENSMUSG00000021457(Syk),ENSMUSG0000002…	ENSMUSG00000000631(Myo18a),ENSMUSG00000000869(Il4),ENSMUSG00000005951(Shpk),ENSMUSG00000010047(Hyal2),ENSMUSG00000020399(Havcr2),ENSMUSG00000020889(Nr1d1),ENSMUSG00000021356(Irf4),ENSMUSG00000029204(Rhoh),ENSMUSG00000032238(Rora),ENSMUSG00000032440(Tgfbr2),ENSMUSG00000034652(Cd300a),ENSMUSG00000034957(Cebpa),ENSMUSG00000037432(Fer1l5),ENSMUSG00000038147(Cd84),ENSMUSG00000039005(Tlr4),ENSMUSG00000…
BP	GO:0071222	cellular response to lipopolysaccharide	79	16	95	219	1.52014e-18	1.24469e-16	ENSMUSG00000000982(Ccl3),ENSMUSG00000002602(Axl),ENSMUSG00000004296(Il12b),ENSMUSG00000016496(Cd274),ENSMUSG00000016529(Il10),ENSMUSG00000017652(Cd40),ENSMUSG00000018920(Cxcl16),ENSMUSG00000019850(Tnfaip3),ENSMUSG00000020638(Cmpk2),ENSMUSG00000020826(Nos2),ENSMUSG00000021025(Nfkbia),ENSMUSG00000021936(Mapk8),ENSMUSG00000022122(Ednrb),ENSMUSG00000022126(Acod1),ENSMUSG00000022255(Mtdh),ENSMUSG00000…	ENSMUSG00000005583(Mef2c),ENSMUSG00000005951(Shpk),ENSMUSG00000008855(Hdac5),ENSMUSG00000020399(Havcr2),ENSMUSG00000020889(Nr1d1),ENSMUSG00000021699(Pde4d),ENSMUSG00000024975(Pdcd4),ENSMUSG00000026842(Abl1),ENSMUSG00000027843(Ptpn22),ENSMUSG00000032377(Plscr4),ENSMUSG00000034610(Tut4),ENSMUSG00000038481(Cdk19),ENSMUSG00000039005(Tlr4),ENSMUSG00000041515(Irf8),ENSMUSG00000056019(Zfp709),ENSMUSG000…
BP	GO:0035456	response to interferon-beta	39	2	41	58	1.59264e-18	1.29725e-16	ENSMUSG00000018899(Irf1),ENSMUSG00000020464(Pnpt1),ENSMUSG00000022971(Ifnar2),ENSMUSG00000025491(Ifitm1),ENSMUSG00000025492(Ifitm3),ENSMUSG00000026535(Ifi202b),ENSMUSG00000026536(Ifi211),ENSMUSG00000028268(Gbp3),ENSMUSG00000028270(Gbp2),ENSMUSG00000031639(Tlr3),ENSMUSG00000032369(Plscr1),ENSMUSG00000034459(Ifit1),ENSMUSG00000039997(Ifi203),ENSMUSG00000040483(Xaf1),ENSMUSG00000042349(Ikbke),ENSMUS…	ENSMUSG00000024349(Sting1),ENSMUSG00000068329(Htra2)
BP	GO:0008283	cell population proliferation	292	217	509	2012	1.7929e-18	1.45281e-16	ENSMUSG00000000184(Ccnd2),ENSMUSG00000000317(Bcl6b),ENSMUSG00000000409(Lck),ENSMUSG00000000441(Raf1),ENSMUSG00000000732(Icosl),ENSMUSG00000000957(Mmp14),ENSMUSG00000001123(Lgals9),ENSMUSG00000001288(Rarg),ENSMUSG00000001300(Efnb2),ENSMUSG00000001435(Col18a1),ENSMUSG00000001632(Brpf1),ENSMUSG00000001707(Eef1e1),ENSMUSG00000002413(Braf),ENSMUSG00000003206(Ebi3),ENSMUSG00000003283(Hck),ENSMUSG000000…	ENSMUSG00000000149(Gna12),ENSMUSG00000000326(Comt),ENSMUSG00000000440(Pparg),ENSMUSG00000000751(Rpa1),ENSMUSG00000000869(Il4),ENSMUSG00000001228(Uhrf1),ENSMUSG00000001552(Jup),ENSMUSG00000001761(Smo),ENSMUSG00000002068(Ccne1),ENSMUSG00000002731(Prkra),ENSMUSG00000003282(Plag1),ENSMUSG00000003882(Il7r),ENSMUSG00000004099(Dnmt1),ENSMUSG00000005514(Por),ENSMUSG00000005583(Mef2c),ENSMUSG00000005718(T…
BP	GO:0010942	positive regulation of cell death	139	79	218	696	1.96163e-18	1.58134e-16	ENSMUSG00000000409(Lck),ENSMUSG00000000915(Hip1r),ENSMUSG00000000982(Ccl3),ENSMUSG00000001288(Rarg),ENSMUSG00000001300(Efnb2),ENSMUSG00000001435(Col18a1),ENSMUSG00000001707(Eef1e1),ENSMUSG00000002307(Daxx),ENSMUSG00000003849(Nqo1),ENSMUSG00000004296(Il12b),ENSMUSG00000004446(Bid),ENSMUSG00000005413(Hmox1),ENSMUSG00000006818(Sod2),ENSMUSG00000007655(Cav1),ENSMUSG00000014349(Ube2z),ENSMUSG000000153…	ENSMUSG00000000440(Pparg),ENSMUSG00000002083(Bbc3),ENSMUSG00000002104(Rapsn),ENSMUSG00000002731(Prkra),ENSMUSG00000003378(Grik5),ENSMUSG00000005583(Mef2c),ENSMUSG00000005718(Tfap4),ENSMUSG00000010047(Hyal2),ENSMUSG00000010751(Tnfrsf22),ENSMUSG00000015846(Rxra),ENSMUSG00000016933(Plcg1),ENSMUSG00000019822(Smpd2),ENSMUSG00000019960(Dusp6),ENSMUSG00000020623(Map2k6),ENSMUSG00000020647(Ncoa1),ENSMUSG…
BP	GO:0032879	regulation of localization	377	295	672	2809	3.44108e-18	2.75974e-16	ENSMUSG00000000275(Trim25),ENSMUSG00000000409(Lck),ENSMUSG00000000532(Acvr1b),ENSMUSG00000000555(Itga5),ENSMUSG00000000628(Hk2),ENSMUSG00000000915(Hip1r),ENSMUSG00000000957(Mmp14),ENSMUSG00000000982(Ccl3),ENSMUSG00000001052(Sec24b),ENSMUSG00000001123(Lgals9),ENSMUSG00000001175(Calm1),ENSMUSG00000001300(Efnb2),ENSMUSG00000001416(Cct3),ENSMUSG00000001435(Col18a1),ENSMUSG00000001467(Cyp51),ENSMUSG00…	ENSMUSG00000000149(Gna12),ENSMUSG00000000326(Comt),ENSMUSG00000000440(Pparg),ENSMUSG00000000631(Myo18a),ENSMUSG00000000869(Il4),ENSMUSG00000001227(Sema6b),ENSMUSG00000001552(Jup),ENSMUSG00000001741(Il16),ENSMUSG00000001761(Smo),ENSMUSG00000002055(Spag5),ENSMUSG00000002068(Ccne1),ENSMUSG00000002083(Bbc3),ENSMUSG00000003378(Grik5),ENSMUSG00000003452(Bicd1),ENSMUSG00000003484(Cyp4f18),ENSMUSG0000000…
BP	GO:0002683	negative regulation of immune system process	109	50	159	460	4.59224e-18	3.66419e-16	ENSMUSG00000000982(Ccl3),ENSMUSG00000001123(Lgals9),ENSMUSG00000002602(Axl),ENSMUSG00000004043(Stat5a),ENSMUSG00000004266(Ptpn6),ENSMUSG00000004296(Il12b),ENSMUSG00000005413(Hmox1),ENSMUSG00000006205(Htra1),ENSMUSG00000014773(Dll1),ENSMUSG00000015316(Slamf1),ENSMUSG00000015839(Nfe2l2),ENSMUSG00000016496(Cd274),ENSMUSG00000016529(Il10),ENSMUSG00000017009(Sdc4),ENSMUSG00000017631(Abr),ENSMUSG000000…	ENSMUSG00000000440(Pparg),ENSMUSG00000000693(Loxl3),ENSMUSG00000000869(Il4),ENSMUSG00000003518(Dusp3),ENSMUSG00000003882(Il7r),ENSMUSG00000006611(Hfe),ENSMUSG00000013707(Tnfaip8l2),ENSMUSG00000014361(Mertk),ENSMUSG00000017697(Ada),ENSMUSG00000019966(Kitl),ENSMUSG00000020101(Vsir),ENSMUSG00000020399(Havcr2),ENSMUSG00000020889(Nr1d1),ENSMUSG00000021127(Zfp36l1),ENSMUSG00000021253(Tgfb3),ENSMUSG0000…
BP	GO:0043068	positive regulation of programmed cell death	128	74	202	634	4.67107e-18	3.70816e-16	ENSMUSG00000000409(Lck),ENSMUSG00000000915(Hip1r),ENSMUSG00000000982(Ccl3),ENSMUSG00000001288(Rarg),ENSMUSG00000001435(Col18a1),ENSMUSG00000001707(Eef1e1),ENSMUSG00000003849(Nqo1),ENSMUSG00000004296(Il12b),ENSMUSG00000004446(Bid),ENSMUSG00000005413(Hmox1),ENSMUSG00000006818(Sod2),ENSMUSG00000007655(Cav1),ENSMUSG00000014349(Ube2z),ENSMUSG00000015312(Gadd45b),ENSMUSG00000015957(Wnt11),ENSMUSG000000…	ENSMUSG00000000440(Pparg),ENSMUSG00000002083(Bbc3),ENSMUSG00000002104(Rapsn),ENSMUSG00000002731(Prkra),ENSMUSG00000003378(Grik5),ENSMUSG00000005583(Mef2c),ENSMUSG00000005718(Tfap4),ENSMUSG00000010047(Hyal2),ENSMUSG00000010751(Tnfrsf22),ENSMUSG00000015846(Rxra),ENSMUSG00000016933(Plcg1),ENSMUSG00000019822(Smpd2),ENSMUSG00000019960(Dusp6),ENSMUSG00000020623(Map2k6),ENSMUSG00000020647(Ncoa1),ENSMUSG…
BP	GO:0071216	cellular response to biotic stimulus	86	17	103	250	4.83006e-18	3.81501e-16	ENSMUSG00000000982(Ccl3),ENSMUSG00000002602(Axl),ENSMUSG00000004296(Il12b),ENSMUSG00000004446(Bid),ENSMUSG00000016496(Cd274),ENSMUSG00000016529(Il10),ENSMUSG00000017652(Cd40),ENSMUSG00000018920(Cxcl16),ENSMUSG00000019850(Tnfaip3),ENSMUSG00000020638(Cmpk2),ENSMUSG00000020826(Nos2),ENSMUSG00000021025(Nfkbia),ENSMUSG00000021457(Syk),ENSMUSG00000021936(Mapk8),ENSMUSG00000022122(Ednrb),ENSMUSG00000022…	ENSMUSG00000005583(Mef2c),ENSMUSG00000005951(Shpk),ENSMUSG00000008855(Hdac5),ENSMUSG00000020399(Havcr2),ENSMUSG00000020889(Nr1d1),ENSMUSG00000021619(Atg10),ENSMUSG00000021699(Pde4d),ENSMUSG00000024975(Pdcd4),ENSMUSG00000026842(Abl1),ENSMUSG00000027843(Ptpn22),ENSMUSG00000032377(Plscr4),ENSMUSG00000034610(Tut4),ENSMUSG00000038481(Cdk19),ENSMUSG00000039005(Tlr4),ENSMUSG00000041515(Irf8),ENSMUSG0000…
BP	GO:0010605	negative regulation of macromolecule metabolic process	376	312	688	2892	4.90065e-18	3.85132e-16	ENSMUSG00000000317(Bcl6b),ENSMUSG00000000532(Acvr1b),ENSMUSG00000000730(Dnmt3l),ENSMUSG00000000838(Fmr1),ENSMUSG00000000982(Ccl3),ENSMUSG00000000983(Wfdc18),ENSMUSG00000001123(Lgals9),ENSMUSG00000001288(Rarg),ENSMUSG00000001348(Acp5),ENSMUSG00000001467(Cyp51),ENSMUSG00000001785(Pwp1),ENSMUSG00000002111(Spi1),ENSMUSG00000002227(Mov10),ENSMUSG00000002307(Daxx),ENSMUSG00000002602(Axl),ENSMUSG0000000…	ENSMUSG00000000028(Cdc45),ENSMUSG00000000037(Scml2),ENSMUSG00000000282(Mnt),ENSMUSG00000000440(Pparg),ENSMUSG00000000693(Loxl3),ENSMUSG00000000869(Il4),ENSMUSG00000001228(Uhrf1),ENSMUSG00000001761(Smo),ENSMUSG00000002068(Ccne1),ENSMUSG00000002731(Prkra),ENSMUSG00000003282(Plag1),ENSMUSG00000003518(Dusp3),ENSMUSG00000004099(Dnmt1),ENSMUSG00000004530(Coro1c),ENSMUSG00000004698(Hdac9),ENSMUSG0000000…
BP	GO:0051336	regulation of hydrolase activity	209	129	338	1226	5.04836e-18	3.94757e-16	ENSMUSG00000000409(Lck),ENSMUSG00000000915(Hip1r),ENSMUSG00000000982(Ccl3),ENSMUSG00000000983(Wfdc18),ENSMUSG00000001175(Calm1),ENSMUSG00000002233(Rhoc),ENSMUSG00000004040(Stat3),ENSMUSG00000004446(Bid),ENSMUSG00000004936(Map2k1),ENSMUSG00000004952(Rasa4),ENSMUSG00000005087(Cd44),ENSMUSG00000005732(Ranbp1),ENSMUSG00000007655(Cav1),ENSMUSG00000011305(Plin5),ENSMUSG00000014349(Ube2z),ENSMUSG0000001…	ENSMUSG00000000440(Pparg),ENSMUSG00000000881(Dlg3),ENSMUSG00000001995(Sipa1l2),ENSMUSG00000002083(Bbc3),ENSMUSG00000002289(Angptl4),ENSMUSG00000002870(Mcm2),ENSMUSG00000003134(Tbc1d8),ENSMUSG00000003452(Bicd1),ENSMUSG00000004530(Coro1c),ENSMUSG00000004633(Chn2),ENSMUSG00000004698(Hdac9),ENSMUSG00000005370(Msh6),ENSMUSG00000005514(Por),ENSMUSG00000005583(Mef2c),ENSMUSG00000005718(Tfap4),ENSMUSG000…
BP	GO:0051251	positive regulation of lymphocyte activation	66	42	108	268	5.22751e-18	4.06731e-16	ENSMUSG00000000409(Lck),ENSMUSG00000000732(Icosl),ENSMUSG00000000957(Mmp14),ENSMUSG00000001123(Lgals9),ENSMUSG00000001300(Efnb2),ENSMUSG00000002602(Axl),ENSMUSG00000004043(Stat5a),ENSMUSG00000004296(Il12b),ENSMUSG00000004709(Cd244a),ENSMUSG00000007655(Cav1),ENSMUSG00000015316(Slamf1),ENSMUSG00000015396(Cd83),ENSMUSG00000016496(Cd274),ENSMUSG00000016529(Il10),ENSMUSG00000017652(Cd40),ENSMUSG000000…	ENSMUSG00000000869(Il4),ENSMUSG00000003882(Il7r),ENSMUSG00000005583(Mef2c),ENSMUSG00000017550(Atad5),ENSMUSG00000017697(Ada),ENSMUSG00000018752(Tnfsfm13),ENSMUSG00000020101(Vsir),ENSMUSG00000020399(Havcr2),ENSMUSG00000021756(Il6st),ENSMUSG00000022672(Prkdc),ENSMUSG00000024151(Msh2),ENSMUSG00000026012(Cd28),ENSMUSG00000026288(Inpp5d),ENSMUSG00000027239(Mdk),ENSMUSG00000027544(Nfatc2),ENSMUSG000000…
MF	GO:0097159	organic cyclic compound binding	624	605	1229	5653	5.49621e-18	4.23521e-16	ENSMUSG00000000078(Klf6),ENSMUSG00000000317(Bcl6b),ENSMUSG00000000409(Lck),ENSMUSG00000000441(Raf1),ENSMUSG00000000532(Acvr1b),ENSMUSG00000000628(Hk2),ENSMUSG00000000776(Polr3d),ENSMUSG00000000838(Fmr1),ENSMUSG00000001056(Nhp2),ENSMUSG00000001248(Gramd1a),ENSMUSG00000001288(Rarg),ENSMUSG00000001416(Cct3),ENSMUSG00000001467(Cyp51),ENSMUSG00000001473(Tubb6),ENSMUSG00000001630(Stk38l),ENSMUSG0000000…	ENSMUSG00000000028(Cdc45),ENSMUSG00000000149(Gna12),ENSMUSG00000000282(Mnt),ENSMUSG00000000440(Pparg),ENSMUSG00000000631(Myo18a),ENSMUSG00000000751(Rpa1),ENSMUSG00000001228(Uhrf1),ENSMUSG00000001755(Coasy),ENSMUSG00000002107(Celf2),ENSMUSG00000002109(Ddb2),ENSMUSG00000002409(Dyrk1b),ENSMUSG00000002486(Tchp),ENSMUSG00000002731(Prkra),ENSMUSG00000002870(Mcm2),ENSMUSG00000003282(Plag1),ENSMUSG000000…
CC	GO:0043232	intracellular non-membrane-bounded organelle	516	558	1074	4857	5.49755e-18	4.23521e-16	ENSMUSG00000000078(Klf6),ENSMUSG00000000184(Ccnd2),ENSMUSG00000000275(Trim25),ENSMUSG00000000409(Lck),ENSMUSG00000000628(Hk2),ENSMUSG00000000730(Dnmt3l),ENSMUSG00000000732(Icosl),ENSMUSG00000000838(Fmr1),ENSMUSG00000000915(Hip1r),ENSMUSG00000000957(Mmp14),ENSMUSG00000001056(Nhp2),ENSMUSG00000001175(Calm1),ENSMUSG00000001288(Rarg),ENSMUSG00000001416(Cct3),ENSMUSG00000001440(Kpnb1),ENSMUSG000000014…	ENSMUSG00000000028(Cdc45),ENSMUSG00000000037(Scml2),ENSMUSG00000000056(Narf),ENSMUSG00000000282(Mnt),ENSMUSG00000000631(Myo18a),ENSMUSG00000000751(Rpa1),ENSMUSG00000001228(Uhrf1),ENSMUSG00000001552(Jup),ENSMUSG00000002031(Ift46),ENSMUSG00000002055(Spag5),ENSMUSG00000002068(Ccne1),ENSMUSG00000002104(Rapsn),ENSMUSG00000002257(Def6),ENSMUSG00000002409(Dyrk1b),ENSMUSG00000002486(Tchp),ENSMUSG00000002…
BP	GO:0002443	leukocyte mediated immunity	92	34	126	334	5.52454e-18	4.23521e-16	ENSMUSG00000000732(Icosl),ENSMUSG00000000982(Ccl3),ENSMUSG00000001123(Lgals9),ENSMUSG00000004043(Stat5a),ENSMUSG00000004266(Ptpn6),ENSMUSG00000004296(Il12b),ENSMUSG00000005413(Hmox1),ENSMUSG00000015316(Slamf1),ENSMUSG00000017631(Abr),ENSMUSG00000017652(Cd40),ENSMUSG00000017776(Crk),ENSMUSG00000018500(Adora2b),ENSMUSG00000020075(Ddx21),ENSMUSG00000020437(Myo1g),ENSMUSG00000020641(Rsad2),ENSMUSG000…	ENSMUSG00000000869(Il4),ENSMUSG00000003882(Il7r),ENSMUSG00000005370(Msh6),ENSMUSG00000006611(Hfe),ENSMUSG00000010054(Tusc2),ENSMUSG00000017550(Atad5),ENSMUSG00000018752(Tnfsfm13),ENSMUSG00000019726(Lyst),ENSMUSG00000020101(Vsir),ENSMUSG00000020399(Havcr2),ENSMUSG00000024151(Msh2),ENSMUSG00000025880(Smad7),ENSMUSG00000026012(Cd28),ENSMUSG00000026288(Inpp5d),ENSMUSG00000026471(Mr1),ENSMUSG000000294…
MF	GO:0019901	protein kinase binding	134	92	226	734	5.56639e-18	4.24648e-16	ENSMUSG00000000184(Ccnd2),ENSMUSG00000000409(Lck),ENSMUSG00000000441(Raf1),ENSMUSG00000001175(Calm1),ENSMUSG00000002233(Rhoc),ENSMUSG00000002307(Daxx),ENSMUSG00000002413(Braf),ENSMUSG00000002983(Relb),ENSMUSG00000002997(Prkar2b),ENSMUSG00000003352(Cacnb3),ENSMUSG00000004040(Stat3),ENSMUSG00000004266(Ptpn6),ENSMUSG00000004936(Map2k1),ENSMUSG00000005057(Sh2b2),ENSMUSG00000005763(Cd247),ENSMUSG00000…	ENSMUSG00000001552(Jup),ENSMUSG00000002068(Ccne1),ENSMUSG00000002731(Prkra),ENSMUSG00000003452(Bicd1),ENSMUSG00000003518(Dusp3),ENSMUSG00000004698(Hdac9),ENSMUSG00000005374(Tbl2),ENSMUSG00000005699(Pard6a),ENSMUSG00000006678(Pola1),ENSMUSG00000008855(Hdac5),ENSMUSG00000009090(Ap1b1),ENSMUSG00000010047(Hyal2),ENSMUSG00000014158(Trpv4),ENSMUSG00000016933(Plcg1),ENSMUSG00000017119(Nbr1),ENSMUSG00000…
BP	GO:0009987	cellular process	1683	1617	3300	17501	6.40521e-18	4.86267e-16	ENSMUSG00000000078(Klf6),ENSMUSG00000000184(Ccnd2),ENSMUSG00000000275(Trim25),ENSMUSG00000000317(Bcl6b),ENSMUSG00000000385(Tmprss2),ENSMUSG00000000409(Lck),ENSMUSG00000000441(Raf1),ENSMUSG00000000532(Acvr1b),ENSMUSG00000000555(Itga5),ENSMUSG00000000628(Hk2),ENSMUSG00000000682(Cd52),ENSMUSG00000000730(Dnmt3l),ENSMUSG00000000732(Icosl),ENSMUSG00000000776(Polr3d),ENSMUSG00000000838(Fmr1),ENSMUSG0000…	ENSMUSG00000000028(Cdc45),ENSMUSG00000000037(Scml2),ENSMUSG00000000149(Gna12),ENSMUSG00000000253(Gmpr),ENSMUSG00000000282(Mnt),ENSMUSG00000000326(Comt),ENSMUSG00000000440(Pparg),ENSMUSG00000000631(Myo18a),ENSMUSG00000000686(Abhd15),ENSMUSG00000000693(Loxl3),ENSMUSG00000000751(Rpa1),ENSMUSG00000000869(Il4),ENSMUSG00000000881(Dlg3),ENSMUSG00000001054(Rmnd5b),ENSMUSG00000001138(Cnnm3),ENSMUSG0000000…
BP	GO:0002460	adaptive immune response based on somatic recombination of immune receptors built from immunoglobulin superfamily domains	69	36	105	259	9.1222e-18	6.89189e-16	ENSMUSG00000000732(Icosl),ENSMUSG00000002983(Relb),ENSMUSG00000004040(Stat3),ENSMUSG00000004266(Ptpn6),ENSMUSG00000004296(Il12b),ENSMUSG00000015316(Slamf1),ENSMUSG00000016496(Cd274),ENSMUSG00000017652(Cd40),ENSMUSG00000018899(Irf1),ENSMUSG00000019850(Tnfaip3),ENSMUSG00000020437(Myo1g),ENSMUSG00000020641(Rsad2),ENSMUSG00000021948(Prkcd),ENSMUSG00000024164(C3),ENSMUSG00000024339(Tap2),ENSMUSG000000…	ENSMUSG00000000693(Loxl3),ENSMUSG00000000869(Il4),ENSMUSG00000003882(Il7r),ENSMUSG00000005370(Msh6),ENSMUSG00000005583(Mef2c),ENSMUSG00000006611(Hfe),ENSMUSG00000017550(Atad5),ENSMUSG00000017697(Ada),ENSMUSG00000018752(Tnfsfm13),ENSMUSG00000020101(Vsir),ENSMUSG00000020399(Havcr2),ENSMUSG00000021356(Irf4),ENSMUSG00000024151(Msh2),ENSMUSG00000025880(Smad7),ENSMUSG00000026012(Cd28),ENSMUSG0000002628…
BP	GO:1901360	organic cyclic compound metabolic process	645	613	1258	5824	9.94729e-18	7.47912e-16	ENSMUSG00000000078(Klf6),ENSMUSG00000000275(Trim25),ENSMUSG00000000317(Bcl6b),ENSMUSG00000000441(Raf1),ENSMUSG00000000532(Acvr1b),ENSMUSG00000000628(Hk2),ENSMUSG00000000730(Dnmt3l),ENSMUSG00000000732(Icosl),ENSMUSG00000000776(Polr3d),ENSMUSG00000000838(Fmr1),ENSMUSG00000000982(Ccl3),ENSMUSG00000001056(Nhp2),ENSMUSG00000001288(Rarg),ENSMUSG00000001305(Rrp15),ENSMUSG00000001416(Cct3),ENSMUSG0000000…	ENSMUSG00000000028(Cdc45),ENSMUSG00000000037(Scml2),ENSMUSG00000000253(Gmpr),ENSMUSG00000000282(Mnt),ENSMUSG00000000326(Comt),ENSMUSG00000000440(Pparg),ENSMUSG00000000693(Loxl3),ENSMUSG00000000751(Rpa1),ENSMUSG00000000869(Il4),ENSMUSG00000001228(Uhrf1),ENSMUSG00000001552(Jup),ENSMUSG00000001755(Coasy),ENSMUSG00000001761(Smo),ENSMUSG00000002068(Ccne1),ENSMUSG00000002107(Celf2),ENSMUSG00000002109(D…
BP	GO:0030155	regulation of cell adhesion	138	80	218	705	1.01329e-17	7.58225e-16	ENSMUSG00000000409(Lck),ENSMUSG00000000555(Itga5),ENSMUSG00000000732(Icosl),ENSMUSG00000000957(Mmp14),ENSMUSG00000001123(Lgals9),ENSMUSG00000001300(Efnb2),ENSMUSG00000002413(Braf),ENSMUSG00000004043(Stat5a),ENSMUSG00000004266(Ptpn6),ENSMUSG00000004296(Il12b),ENSMUSG00000004709(Cd244a),ENSMUSG00000004936(Map2k1),ENSMUSG00000005087(Cd44),ENSMUSG00000007655(Cav1),ENSMUSG00000014599(Csf1),ENSMUSG0000…	ENSMUSG00000000693(Loxl3),ENSMUSG00000000869(Il4),ENSMUSG00000001552(Jup),ENSMUSG00000003518(Dusp3),ENSMUSG00000003882(Il7r),ENSMUSG00000004530(Coro1c),ENSMUSG00000005958(Ephb3),ENSMUSG00000006611(Hfe),ENSMUSG00000010051(Hyal1),ENSMUSG00000013707(Tnfaip8l2),ENSMUSG00000014158(Trpv4),ENSMUSG00000017132(Cyth1),ENSMUSG00000017697(Ada),ENSMUSG00000020032(Nuak1),ENSMUSG00000020101(Vsir),ENSMUSG0000002…
BP	GO:0030099	myeloid cell differentiation	93	50	143	401	1.04906e-17	7.81249e-16	ENSMUSG00000000532(Acvr1b),ENSMUSG00000000982(Ccl3),ENSMUSG00000001288(Rarg),ENSMUSG00000002111(Spi1),ENSMUSG00000002983(Relb),ENSMUSG00000003070(Efna2),ENSMUSG00000004040(Stat3),ENSMUSG00000004043(Stat5a),ENSMUSG00000004266(Ptpn6),ENSMUSG00000004296(Il12b),ENSMUSG00000006705(Pknox1),ENSMUSG00000014599(Csf1),ENSMUSG00000014773(Dll1),ENSMUSG00000015605(Srf),ENSMUSG00000018654(Ikzf1),ENSMUSG0000001…	ENSMUSG00000000440(Pparg),ENSMUSG00000000869(Il4),ENSMUSG00000003812(Dnase2a),ENSMUSG00000005583(Mef2c),ENSMUSG00000006362(Cbfa2t3),ENSMUSG00000016087(Fli1),ENSMUSG00000018669(Cdk5rap3),ENSMUSG00000019966(Kitl),ENSMUSG00000020689(Itgb3),ENSMUSG00000021127(Zfp36l1),ENSMUSG00000021250(Fos),ENSMUSG00000021356(Irf4),ENSMUSG00000022105(Rb1),ENSMUSG00000022672(Prkdc),ENSMUSG00000024140(Epas1),ENSMUSG00…
BP	GO:0006996	organelle organization	411	448	859	3759	1.13078e-17	8.38119e-16	ENSMUSG00000000441(Raf1),ENSMUSG00000000628(Hk2),ENSMUSG00000000730(Dnmt3l),ENSMUSG00000000915(Hip1r),ENSMUSG00000000982(Ccl3),ENSMUSG00000001052(Sec24b),ENSMUSG00000001056(Nhp2),ENSMUSG00000001175(Calm1),ENSMUSG00000001416(Cct3),ENSMUSG00000001440(Kpnb1),ENSMUSG00000001473(Tubb6),ENSMUSG00000001632(Brpf1),ENSMUSG00000001785(Pwp1),ENSMUSG00000002103(Acp2),ENSMUSG00000002111(Spi1),ENSMUSG000000022…	ENSMUSG00000000028(Cdc45),ENSMUSG00000000037(Scml2),ENSMUSG00000000631(Myo18a),ENSMUSG00000000751(Rpa1),ENSMUSG00000000881(Dlg3),ENSMUSG00000001143(Lman2l),ENSMUSG00000001228(Uhrf1),ENSMUSG00000001751(Naglu),ENSMUSG00000002031(Ift46),ENSMUSG00000002055(Spag5),ENSMUSG00000002068(Ccne1),ENSMUSG00000002083(Bbc3),ENSMUSG00000002109(Ddb2),ENSMUSG00000002486(Tchp),ENSMUSG00000002835(Chaf1a),ENSMUSG0000…
BP	GO:0040012	regulation of locomotion	173	116	289	1013	1.1773e-17	8.68479e-16	ENSMUSG00000000532(Acvr1b),ENSMUSG00000000555(Itga5),ENSMUSG00000000957(Mmp14),ENSMUSG00000000982(Ccl3),ENSMUSG00000001123(Lgals9),ENSMUSG00000001300(Efnb2),ENSMUSG00000001435(Col18a1),ENSMUSG00000002233(Rhoc),ENSMUSG00000002413(Braf),ENSMUSG00000003665(Has1),ENSMUSG00000004040(Stat3),ENSMUSG00000004043(Stat5a),ENSMUSG00000004044(Cavin1),ENSMUSG00000004591(Pkn2),ENSMUSG00000004936(Map2k1),ENSMUSG…	ENSMUSG00000000149(Gna12),ENSMUSG00000000440(Pparg),ENSMUSG00000000869(Il4),ENSMUSG00000001227(Sema6b),ENSMUSG00000001552(Jup),ENSMUSG00000001741(Il16),ENSMUSG00000001761(Smo),ENSMUSG00000003518(Dusp3),ENSMUSG00000004462(Tbccd1),ENSMUSG00000004530(Coro1c),ENSMUSG00000004698(Hdac9),ENSMUSG00000005583(Mef2c),ENSMUSG00000006464(Bbs1),ENSMUSG00000008855(Hdac5),ENSMUSG00000010047(Hyal2),ENSMUSG0000001…
BP	GO:1903708	positive regulation of hemopoiesis	60	31	91	211	1.26308e-17	9.27383e-16	ENSMUSG00000000409(Lck),ENSMUSG00000000532(Acvr1b),ENSMUSG00000000957(Mmp14),ENSMUSG00000000982(Ccl3),ENSMUSG00000001123(Lgals9),ENSMUSG00000002602(Axl),ENSMUSG00000004040(Stat3),ENSMUSG00000004043(Stat5a),ENSMUSG00000004296(Il12b),ENSMUSG00000014599(Csf1),ENSMUSG00000015396(Cd83),ENSMUSG00000016529(Il10),ENSMUSG00000018899(Irf1),ENSMUSG00000019982(Myb),ENSMUSG00000021109(Hif1a),ENSMUSG0000002127…	ENSMUSG00000000869(Il4),ENSMUSG00000003882(Il7r),ENSMUSG00000017697(Ada),ENSMUSG00000019966(Kitl),ENSMUSG00000020101(Vsir),ENSMUSG00000020689(Itgb3),ENSMUSG00000021127(Zfp36l1),ENSMUSG00000021250(Fos),ENSMUSG00000022105(Rb1),ENSMUSG00000022672(Prkdc),ENSMUSG00000026288(Inpp5d),ENSMUSG00000027239(Mdk),ENSMUSG00000028669(Pithd1),ENSMUSG00000028717(Tal1),ENSMUSG00000028988(Ctnnbip1),ENSMUSG000000292…
BP	GO:0051607	defense response to virus	86	17	103	253	1.31706e-17	9.62499e-16	ENSMUSG00000000275(Trim25),ENSMUSG00000000776(Polr3d),ENSMUSG00000002227(Mov10),ENSMUSG00000004296(Il12b),ENSMUSG00000006205(Htra1),ENSMUSG00000012519(Mlkl),ENSMUSG00000017652(Cd40),ENSMUSG00000017830(Dhx58),ENSMUSG00000018583(G3bp1),ENSMUSG00000018899(Irf1),ENSMUSG00000019842(Traf3ip2),ENSMUSG00000020075(Ddx21),ENSMUSG00000020108(Ddit4),ENSMUSG00000020115(Tbk1),ENSMUSG00000020641(Rsad2),ENSMUSG0…	ENSMUSG00000000869(Il4),ENSMUSG00000005102(Eif2ak4),ENSMUSG00000010047(Hyal2),ENSMUSG00000021703(Serinc5),ENSMUSG00000022051(Bnip3l),ENSMUSG00000024349(Sting1),ENSMUSG00000027843(Ptpn22),ENSMUSG00000030314(Atg7),ENSMUSG00000032109(Nlrx1),ENSMUSG00000034292(Traf3ip1),ENSMUSG00000034783(Cd207),ENSMUSG00000035834(Polr3g),ENSMUSG00000039199(Zdhhc1),ENSMUSG00000040613(Apobec1),ENSMUSG00000054115(Skp2)…
BP	GO:0009889	regulation of biosynthetic process	491	436	927	4110	1.60057e-17	1.16425e-15	ENSMUSG00000000078(Klf6),ENSMUSG00000000275(Trim25),ENSMUSG00000000317(Bcl6b),ENSMUSG00000000441(Raf1),ENSMUSG00000000532(Acvr1b),ENSMUSG00000000730(Dnmt3l),ENSMUSG00000000838(Fmr1),ENSMUSG00000000982(Ccl3),ENSMUSG00000001288(Rarg),ENSMUSG00000001348(Acp5),ENSMUSG00000001416(Cct3),ENSMUSG00000001542(Ell2),ENSMUSG00000001627(Ifrd1),ENSMUSG00000001632(Brpf1),ENSMUSG00000001785(Pwp1),ENSMUSG00000002…	ENSMUSG00000000028(Cdc45),ENSMUSG00000000037(Scml2),ENSMUSG00000000282(Mnt),ENSMUSG00000000440(Pparg),ENSMUSG00000000693(Loxl3),ENSMUSG00000000869(Il4),ENSMUSG00000001228(Uhrf1),ENSMUSG00000001552(Jup),ENSMUSG00000001761(Smo),ENSMUSG00000002068(Ccne1),ENSMUSG00000002409(Dyrk1b),ENSMUSG00000002486(Tchp),ENSMUSG00000003282(Plag1),ENSMUSG00000003575(Crtc1),ENSMUSG00000003992(Ssbp2),ENSMUSG0000000409…
BP	GO:0001934	positive regulation of protein phosphorylation	180	108	288	1011	1.67753e-17	1.21458e-15	ENSMUSG00000000184(Ccnd2),ENSMUSG00000000409(Lck),ENSMUSG00000000441(Raf1),ENSMUSG00000000532(Acvr1b),ENSMUSG00000000555(Itga5),ENSMUSG00000000982(Ccl3),ENSMUSG00000001123(Lgals9),ENSMUSG00000002307(Daxx),ENSMUSG00000002413(Braf),ENSMUSG00000002699(Lcp2),ENSMUSG00000003948(Mmd),ENSMUSG00000004221(Ikbkg),ENSMUSG00000004296(Il12b),ENSMUSG00000004936(Map2k1),ENSMUSG00000005087(Cd44),ENSMUSG000000076…	ENSMUSG00000000869(Il4),ENSMUSG00000000881(Dlg3),ENSMUSG00000005102(Eif2ak4),ENSMUSG00000005583(Mef2c),ENSMUSG00000006235(Epor),ENSMUSG00000006611(Hfe),ENSMUSG00000013483(Card14),ENSMUSG00000014158(Trpv4),ENSMUSG00000014426(Map3k4),ENSMUSG00000016984(Etaa1),ENSMUSG00000017466(Timp2),ENSMUSG00000018849(Wwc1),ENSMUSG00000019768(Esr1),ENSMUSG00000019966(Kitl),ENSMUSG00000020189(Osbpl8),ENSMUSG000000…
BP	GO:0043065	positive regulation of apoptotic process	126	73	199	629	1.94033e-17	1.39838e-15	ENSMUSG00000000409(Lck),ENSMUSG00000000915(Hip1r),ENSMUSG00000000982(Ccl3),ENSMUSG00000001288(Rarg),ENSMUSG00000001435(Col18a1),ENSMUSG00000001707(Eef1e1),ENSMUSG00000003849(Nqo1),ENSMUSG00000004296(Il12b),ENSMUSG00000004446(Bid),ENSMUSG00000005413(Hmox1),ENSMUSG00000006818(Sod2),ENSMUSG00000007655(Cav1),ENSMUSG00000014349(Ube2z),ENSMUSG00000015312(Gadd45b),ENSMUSG00000015957(Wnt11),ENSMUSG000000…	ENSMUSG00000000440(Pparg),ENSMUSG00000002083(Bbc3),ENSMUSG00000002104(Rapsn),ENSMUSG00000002731(Prkra),ENSMUSG00000003378(Grik5),ENSMUSG00000005583(Mef2c),ENSMUSG00000005718(Tfap4),ENSMUSG00000010047(Hyal2),ENSMUSG00000010751(Tnfrsf22),ENSMUSG00000015846(Rxra),ENSMUSG00000016933(Plcg1),ENSMUSG00000019822(Smpd2),ENSMUSG00000019960(Dusp6),ENSMUSG00000020623(Map2k6),ENSMUSG00000020647(Ncoa1),ENSMUSG…
BP	GO:0046483	heterocycle metabolic process	616	587	1203	5545	1.97545e-17	1.41716e-15	ENSMUSG00000000078(Klf6),ENSMUSG00000000275(Trim25),ENSMUSG00000000317(Bcl6b),ENSMUSG00000000441(Raf1),ENSMUSG00000000532(Acvr1b),ENSMUSG00000000628(Hk2),ENSMUSG00000000730(Dnmt3l),ENSMUSG00000000732(Icosl),ENSMUSG00000000776(Polr3d),ENSMUSG00000000838(Fmr1),ENSMUSG00000000982(Ccl3),ENSMUSG00000001056(Nhp2),ENSMUSG00000001288(Rarg),ENSMUSG00000001305(Rrp15),ENSMUSG00000001416(Cct3),ENSMUSG0000000…	ENSMUSG00000000028(Cdc45),ENSMUSG00000000037(Scml2),ENSMUSG00000000253(Gmpr),ENSMUSG00000000282(Mnt),ENSMUSG00000000440(Pparg),ENSMUSG00000000693(Loxl3),ENSMUSG00000000751(Rpa1),ENSMUSG00000000869(Il4),ENSMUSG00000001228(Uhrf1),ENSMUSG00000001552(Jup),ENSMUSG00000001755(Coasy),ENSMUSG00000001761(Smo),ENSMUSG00000002068(Ccne1),ENSMUSG00000002107(Celf2),ENSMUSG00000002109(Ddb2),ENSMUSG00000002409(D…
BP	GO:0045595	regulation of cell differentiation	274	209	483	1915	2.90702e-17	2.07593e-15	ENSMUSG00000000317(Bcl6b),ENSMUSG00000000409(Lck),ENSMUSG00000000532(Acvr1b),ENSMUSG00000000957(Mmp14),ENSMUSG00000000982(Ccl3),ENSMUSG00000001123(Lgals9),ENSMUSG00000001288(Rarg),ENSMUSG00000001300(Efnb2),ENSMUSG00000001627(Ifrd1),ENSMUSG00000001785(Pwp1),ENSMUSG00000002111(Spi1),ENSMUSG00000002227(Mov10),ENSMUSG00000002413(Braf),ENSMUSG00000002602(Axl),ENSMUSG00000003948(Mmd),ENSMUSG00000004040…	ENSMUSG00000000440(Pparg),ENSMUSG00000000693(Loxl3),ENSMUSG00000000869(Il4),ENSMUSG00000001227(Sema6b),ENSMUSG00000001761(Smo),ENSMUSG00000002068(Ccne1),ENSMUSG00000002274(Metrn),ENSMUSG00000003282(Plag1),ENSMUSG00000003575(Crtc1),ENSMUSG00000003882(Il7r),ENSMUSG00000004099(Dnmt1),ENSMUSG00000004530(Coro1c),ENSMUSG00000004798(Ulk2),ENSMUSG00000005102(Eif2ak4),ENSMUSG00000005514(Por),ENSMUSG000000…
BP	GO:0006139	nucleobase-containing compound metabolic process	605	571	1176	5411	3.26668e-17	2.32216e-15	ENSMUSG00000000078(Klf6),ENSMUSG00000000275(Trim25),ENSMUSG00000000317(Bcl6b),ENSMUSG00000000441(Raf1),ENSMUSG00000000532(Acvr1b),ENSMUSG00000000628(Hk2),ENSMUSG00000000730(Dnmt3l),ENSMUSG00000000732(Icosl),ENSMUSG00000000776(Polr3d),ENSMUSG00000000838(Fmr1),ENSMUSG00000000982(Ccl3),ENSMUSG00000001056(Nhp2),ENSMUSG00000001288(Rarg),ENSMUSG00000001305(Rrp15),ENSMUSG00000001416(Cct3),ENSMUSG0000000…	ENSMUSG00000000028(Cdc45),ENSMUSG00000000037(Scml2),ENSMUSG00000000253(Gmpr),ENSMUSG00000000282(Mnt),ENSMUSG00000000440(Pparg),ENSMUSG00000000693(Loxl3),ENSMUSG00000000751(Rpa1),ENSMUSG00000000869(Il4),ENSMUSG00000001228(Uhrf1),ENSMUSG00000001552(Jup),ENSMUSG00000001755(Coasy),ENSMUSG00000001761(Smo),ENSMUSG00000002068(Ccne1),ENSMUSG00000002107(Celf2),ENSMUSG00000002109(Ddb2),ENSMUSG00000002409(D…
BP	GO:0048869	cellular developmental process	540	434	974	4365	4.29771e-17	3.04126e-15	ENSMUSG00000000317(Bcl6b),ENSMUSG00000000409(Lck),ENSMUSG00000000441(Raf1),ENSMUSG00000000532(Acvr1b),ENSMUSG00000000555(Itga5),ENSMUSG00000000730(Dnmt3l),ENSMUSG00000000957(Mmp14),ENSMUSG00000000982(Ccl3),ENSMUSG00000001052(Sec24b),ENSMUSG00000001123(Lgals9),ENSMUSG00000001288(Rarg),ENSMUSG00000001300(Efnb2),ENSMUSG00000001435(Col18a1),ENSMUSG00000001627(Ifrd1),ENSMUSG00000001632(Brpf1),ENSMUSG0…	ENSMUSG00000000149(Gna12),ENSMUSG00000000282(Mnt),ENSMUSG00000000440(Pparg),ENSMUSG00000000693(Loxl3),ENSMUSG00000000869(Il4),ENSMUSG00000001227(Sema6b),ENSMUSG00000001751(Naglu),ENSMUSG00000001761(Smo),ENSMUSG00000002068(Ccne1),ENSMUSG00000002274(Metrn),ENSMUSG00000002409(Dyrk1b),ENSMUSG00000002803(Btbd6),ENSMUSG00000003282(Plag1),ENSMUSG00000003344(Btbd2),ENSMUSG00000003575(Crtc1),ENSMUSG000000…
BP	GO:0040011	locomotion	278	182	460	1810	4.52864e-17	3.19025e-15	ENSMUSG00000000532(Acvr1b),ENSMUSG00000000555(Itga5),ENSMUSG00000000957(Mmp14),ENSMUSG00000000982(Ccl3),ENSMUSG00000001123(Lgals9),ENSMUSG00000001300(Efnb2),ENSMUSG00000001435(Col18a1),ENSMUSG00000002233(Rhoc),ENSMUSG00000002413(Braf),ENSMUSG00000002602(Axl),ENSMUSG00000002897(Il17ra),ENSMUSG00000003070(Efna2),ENSMUSG00000003665(Has1),ENSMUSG00000004040(Stat3),ENSMUSG00000004043(Stat5a),ENSMUSG00…	ENSMUSG00000000149(Gna12),ENSMUSG00000000440(Pparg),ENSMUSG00000000631(Myo18a),ENSMUSG00000000869(Il4),ENSMUSG00000001227(Sema6b),ENSMUSG00000001552(Jup),ENSMUSG00000001741(Il16),ENSMUSG00000001761(Smo),ENSMUSG00000002031(Ift46),ENSMUSG00000003518(Dusp3),ENSMUSG00000004151(Etv1),ENSMUSG00000004462(Tbccd1),ENSMUSG00000004530(Coro1c),ENSMUSG00000004698(Hdac9),ENSMUSG00000005583(Mef2c),ENSMUSG000000…
BP	GO:0031326	regulation of cellular biosynthetic process	482	428	910	4038	4.72847e-17	3.31608e-15	ENSMUSG00000000078(Klf6),ENSMUSG00000000275(Trim25),ENSMUSG00000000317(Bcl6b),ENSMUSG00000000441(Raf1),ENSMUSG00000000532(Acvr1b),ENSMUSG00000000730(Dnmt3l),ENSMUSG00000000838(Fmr1),ENSMUSG00000000982(Ccl3),ENSMUSG00000001288(Rarg),ENSMUSG00000001348(Acp5),ENSMUSG00000001416(Cct3),ENSMUSG00000001542(Ell2),ENSMUSG00000001627(Ifrd1),ENSMUSG00000001632(Brpf1),ENSMUSG00000001785(Pwp1),ENSMUSG00000002…	ENSMUSG00000000028(Cdc45),ENSMUSG00000000037(Scml2),ENSMUSG00000000282(Mnt),ENSMUSG00000000440(Pparg),ENSMUSG00000000693(Loxl3),ENSMUSG00000000869(Il4),ENSMUSG00000001228(Uhrf1),ENSMUSG00000001552(Jup),ENSMUSG00000001761(Smo),ENSMUSG00000002068(Ccne1),ENSMUSG00000002409(Dyrk1b),ENSMUSG00000002486(Tchp),ENSMUSG00000003282(Plag1),ENSMUSG00000003575(Crtc1),ENSMUSG00000003992(Ssbp2),ENSMUSG0000000409…
MF	GO:0097367	carbohydrate derivative binding	292	257	549	2233	4.87214e-17	3.40158e-15	ENSMUSG00000000409(Lck),ENSMUSG00000000441(Raf1),ENSMUSG00000000532(Acvr1b),ENSMUSG00000000628(Hk2),ENSMUSG00000001123(Lgals9),ENSMUSG00000001416(Cct3),ENSMUSG00000001473(Tubb6),ENSMUSG00000001630(Stk38l),ENSMUSG00000002227(Mov10),ENSMUSG00000002233(Rhoc),ENSMUSG00000002413(Braf),ENSMUSG00000002602(Axl),ENSMUSG00000002997(Prkar2b),ENSMUSG00000003283(Hck),ENSMUSG00000004098(Col5a3),ENSMUSG00000004…	ENSMUSG00000000149(Gna12),ENSMUSG00000000631(Myo18a),ENSMUSG00000001755(Coasy),ENSMUSG00000002409(Dyrk1b),ENSMUSG00000002870(Mcm2),ENSMUSG00000003153(Slc2a3),ENSMUSG00000003809(Gcdh),ENSMUSG00000004187(Kifc2),ENSMUSG00000004347(Pde1c),ENSMUSG00000004768(Rab23),ENSMUSG00000004798(Ulk2),ENSMUSG00000004933(Matk),ENSMUSG00000005043(Sgsh),ENSMUSG00000005102(Eif2ak4),ENSMUSG00000005370(Msh6),ENSMUSG000…
BP	GO:0006725	cellular aromatic compound metabolic process	623	592	1215	5623	5.11047e-17	3.55212e-15	ENSMUSG00000000078(Klf6),ENSMUSG00000000275(Trim25),ENSMUSG00000000317(Bcl6b),ENSMUSG00000000441(Raf1),ENSMUSG00000000532(Acvr1b),ENSMUSG00000000628(Hk2),ENSMUSG00000000730(Dnmt3l),ENSMUSG00000000732(Icosl),ENSMUSG00000000776(Polr3d),ENSMUSG00000000838(Fmr1),ENSMUSG00000000982(Ccl3),ENSMUSG00000001056(Nhp2),ENSMUSG00000001288(Rarg),ENSMUSG00000001305(Rrp15),ENSMUSG00000001416(Cct3),ENSMUSG0000000…	ENSMUSG00000000028(Cdc45),ENSMUSG00000000037(Scml2),ENSMUSG00000000253(Gmpr),ENSMUSG00000000282(Mnt),ENSMUSG00000000326(Comt),ENSMUSG00000000440(Pparg),ENSMUSG00000000693(Loxl3),ENSMUSG00000000751(Rpa1),ENSMUSG00000000869(Il4),ENSMUSG00000001228(Uhrf1),ENSMUSG00000001552(Jup),ENSMUSG00000001755(Coasy),ENSMUSG00000001761(Smo),ENSMUSG00000002068(Ccne1),ENSMUSG00000002107(Celf2),ENSMUSG00000002109(D…
BP	GO:0050789	regulation of biological process	1307	1129	2436	12354	7.38889e-17	5.11305e-15	ENSMUSG00000000078(Klf6),ENSMUSG00000000184(Ccnd2),ENSMUSG00000000275(Trim25),ENSMUSG00000000317(Bcl6b),ENSMUSG00000000385(Tmprss2),ENSMUSG00000000409(Lck),ENSMUSG00000000441(Raf1),ENSMUSG00000000532(Acvr1b),ENSMUSG00000000555(Itga5),ENSMUSG00000000628(Hk2),ENSMUSG00000000730(Dnmt3l),ENSMUSG00000000732(Icosl),ENSMUSG00000000776(Polr3d),ENSMUSG00000000838(Fmr1),ENSMUSG00000000915(Hip1r),ENSMUSG000…	ENSMUSG00000000028(Cdc45),ENSMUSG00000000037(Scml2),ENSMUSG00000000149(Gna12),ENSMUSG00000000282(Mnt),ENSMUSG00000000326(Comt),ENSMUSG00000000440(Pparg),ENSMUSG00000000631(Myo18a),ENSMUSG00000000693(Loxl3),ENSMUSG00000000751(Rpa1),ENSMUSG00000000869(Il4),ENSMUSG00000000881(Dlg3),ENSMUSG00000001227(Sema6b),ENSMUSG00000001228(Uhrf1),ENSMUSG00000001482(Def8),ENSMUSG00000001552(Jup),ENSMUSG0000000174…
MF	GO:0016787	hydrolase activity	280	324	604	2506	8.14475e-17	5.61127e-15	ENSMUSG00000000385(Tmprss2),ENSMUSG00000000409(Lck),ENSMUSG00000000957(Mmp14),ENSMUSG00000001348(Acp5),ENSMUSG00000001473(Tubb6),ENSMUSG00000001663(Gstt1),ENSMUSG00000002103(Acp2),ENSMUSG00000002227(Mov10),ENSMUSG00000002233(Rhoc),ENSMUSG00000002847(Pla1a),ENSMUSG00000003848(Nob1),ENSMUSG00000004266(Ptpn6),ENSMUSG00000005413(Hmox1),ENSMUSG00000005667(Mthfd2),ENSMUSG00000005686(Ampd3),ENSMUSG00000…	ENSMUSG00000000149(Gna12),ENSMUSG00000000631(Myo18a),ENSMUSG00000000686(Abhd15),ENSMUSG00000001751(Naglu),ENSMUSG00000001865(Cpa3),ENSMUSG00000001942(Siae),ENSMUSG00000002329(Mdp1),ENSMUSG00000002346(Slc25a42),ENSMUSG00000002870(Mcm2),ENSMUSG00000003518(Dusp3),ENSMUSG00000003812(Dnase2a),ENSMUSG00000004187(Kifc2),ENSMUSG00000004347(Pde1c),ENSMUSG00000004565(Pnpla6),ENSMUSG00000004698(Hdac9),ENSMU…
BP	GO:1903037	regulation of leukocyte cell-cell adhesion	75	39	114	299	8.52488e-17	5.84395e-15	ENSMUSG00000000409(Lck),ENSMUSG00000000732(Icosl),ENSMUSG00000001123(Lgals9),ENSMUSG00000001300(Efnb2),ENSMUSG00000004043(Stat5a),ENSMUSG00000004266(Ptpn6),ENSMUSG00000004296(Il12b),ENSMUSG00000004709(Cd244a),ENSMUSG00000005087(Cd44),ENSMUSG00000007655(Cav1),ENSMUSG00000015316(Slamf1),ENSMUSG00000015396(Cd83),ENSMUSG00000016496(Cd274),ENSMUSG00000017009(Sdc4),ENSMUSG00000018899(Irf1),ENSMUSG00000…	ENSMUSG00000000693(Loxl3),ENSMUSG00000000869(Il4),ENSMUSG00000003518(Dusp3),ENSMUSG00000003882(Il7r),ENSMUSG00000006611(Hfe),ENSMUSG00000013707(Tnfaip8l2),ENSMUSG00000017697(Ada),ENSMUSG00000020101(Vsir),ENSMUSG00000020399(Havcr2),ENSMUSG00000021756(Il6st),ENSMUSG00000022367(Has2),ENSMUSG00000023915(Tnfrsf21),ENSMUSG00000025880(Smad7),ENSMUSG00000026012(Cd28),ENSMUSG00000027239(Mdk),ENSMUSG000000…
BP	GO:0022603	regulation of anatomical structure morphogenesis	172	126	298	1067	8.55723e-17	5.84395e-15	ENSMUSG00000000555(Itga5),ENSMUSG00000000628(Hk2),ENSMUSG00000000982(Ccl3),ENSMUSG00000001052(Sec24b),ENSMUSG00000001300(Efnb2),ENSMUSG00000001627(Ifrd1),ENSMUSG00000002227(Mov10),ENSMUSG00000002233(Rhoc),ENSMUSG00000002413(Braf),ENSMUSG00000003283(Hck),ENSMUSG00000004040(Stat3),ENSMUSG00000004296(Il12b),ENSMUSG00000004936(Map2k1),ENSMUSG00000005087(Cd44),ENSMUSG00000005413(Hmox1),ENSMUSG00000005…	ENSMUSG00000000149(Gna12),ENSMUSG00000000440(Pparg),ENSMUSG00000000869(Il4),ENSMUSG00000001227(Sema6b),ENSMUSG00000001552(Jup),ENSMUSG00000001761(Smo),ENSMUSG00000002274(Metrn),ENSMUSG00000004462(Tbccd1),ENSMUSG00000004530(Coro1c),ENSMUSG00000004698(Hdac9),ENSMUSG00000004798(Ulk2),ENSMUSG00000005514(Por),ENSMUSG00000005583(Mef2c),ENSMUSG00000005958(Ephb3),ENSMUSG00000006219(Fblim1),ENSMUSG0000000…
BP	GO:2000145	regulation of cell motility	164	111	275	966	1.03844e-16	7.06095e-15	ENSMUSG00000000532(Acvr1b),ENSMUSG00000000555(Itga5),ENSMUSG00000000957(Mmp14),ENSMUSG00000000982(Ccl3),ENSMUSG00000001123(Lgals9),ENSMUSG00000001435(Col18a1),ENSMUSG00000002233(Rhoc),ENSMUSG00000002413(Braf),ENSMUSG00000003665(Has1),ENSMUSG00000004040(Stat3),ENSMUSG00000004043(Stat5a),ENSMUSG00000004044(Cavin1),ENSMUSG00000004591(Pkn2),ENSMUSG00000004936(Map2k1),ENSMUSG00000005413(Hmox1),ENSMUSG…	ENSMUSG00000000149(Gna12),ENSMUSG00000000440(Pparg),ENSMUSG00000000869(Il4),ENSMUSG00000001227(Sema6b),ENSMUSG00000001552(Jup),ENSMUSG00000001761(Smo),ENSMUSG00000003518(Dusp3),ENSMUSG00000004462(Tbccd1),ENSMUSG00000004530(Coro1c),ENSMUSG00000004698(Hdac9),ENSMUSG00000005583(Mef2c),ENSMUSG00000006464(Bbs1),ENSMUSG00000008855(Hdac5),ENSMUSG00000010047(Hyal2),ENSMUSG00000010051(Hyal1),ENSMUSG000000…
BP	GO:0031324	negative regulation of cellular metabolic process	334	308	642	2701	1.10642e-16	7.4906e-15	ENSMUSG00000000317(Bcl6b),ENSMUSG00000000628(Hk2),ENSMUSG00000000730(Dnmt3l),ENSMUSG00000000838(Fmr1),ENSMUSG00000000983(Wfdc18),ENSMUSG00000001288(Rarg),ENSMUSG00000001348(Acp5),ENSMUSG00000001785(Pwp1),ENSMUSG00000002111(Spi1),ENSMUSG00000002227(Mov10),ENSMUSG00000002307(Daxx),ENSMUSG00000002845(Tmem39a),ENSMUSG00000002881(Nab1),ENSMUSG00000002983(Relb),ENSMUSG00000002997(Prkar2b),ENSMUSG000000…	ENSMUSG00000000028(Cdc45),ENSMUSG00000000037(Scml2),ENSMUSG00000000282(Mnt),ENSMUSG00000000326(Comt),ENSMUSG00000000440(Pparg),ENSMUSG00000000693(Loxl3),ENSMUSG00000000869(Il4),ENSMUSG00000000881(Dlg3),ENSMUSG00000001228(Uhrf1),ENSMUSG00000001761(Smo),ENSMUSG00000002068(Ccne1),ENSMUSG00000003518(Dusp3),ENSMUSG00000004099(Dnmt1),ENSMUSG00000004530(Coro1c),ENSMUSG00000004698(Hdac9),ENSMUSG000000051…
BP	GO:0050896	response to stimulus	1088	855	1943	9581	1.30752e-16	8.8139e-15	ENSMUSG00000000184(Ccnd2),ENSMUSG00000000204(Slfn4),ENSMUSG00000000275(Trim25),ENSMUSG00000000317(Bcl6b),ENSMUSG00000000409(Lck),ENSMUSG00000000441(Raf1),ENSMUSG00000000532(Acvr1b),ENSMUSG00000000555(Itga5),ENSMUSG00000000628(Hk2),ENSMUSG00000000682(Cd52),ENSMUSG00000000732(Icosl),ENSMUSG00000000776(Polr3d),ENSMUSG00000000915(Hip1r),ENSMUSG00000000957(Mmp14),ENSMUSG00000000982(Ccl3),ENSMUSG000000…	ENSMUSG00000000028(Cdc45),ENSMUSG00000000149(Gna12),ENSMUSG00000000282(Mnt),ENSMUSG00000000318(Clec10a),ENSMUSG00000000326(Comt),ENSMUSG00000000440(Pparg),ENSMUSG00000000631(Myo18a),ENSMUSG00000000693(Loxl3),ENSMUSG00000000751(Rpa1),ENSMUSG00000000869(Il4),ENSMUSG00000001227(Sema6b),ENSMUSG00000001228(Uhrf1),ENSMUSG00000001482(Def8),ENSMUSG00000001552(Jup),ENSMUSG00000001741(Il16),ENSMUSG00000001…
BP	GO:0030334	regulation of cell migration	160	103	263	915	1.38213e-16	9.25132e-15	ENSMUSG00000000532(Acvr1b),ENSMUSG00000000555(Itga5),ENSMUSG00000000957(Mmp14),ENSMUSG00000000982(Ccl3),ENSMUSG00000001123(Lgals9),ENSMUSG00000001435(Col18a1),ENSMUSG00000002233(Rhoc),ENSMUSG00000002413(Braf),ENSMUSG00000003665(Has1),ENSMUSG00000004040(Stat3),ENSMUSG00000004043(Stat5a),ENSMUSG00000004936(Map2k1),ENSMUSG00000005413(Hmox1),ENSMUSG00000006818(Sod2),ENSMUSG00000007655(Cav1),ENSMUSG00…	ENSMUSG00000000149(Gna12),ENSMUSG00000000440(Pparg),ENSMUSG00000000869(Il4),ENSMUSG00000001227(Sema6b),ENSMUSG00000001552(Jup),ENSMUSG00000001761(Smo),ENSMUSG00000003518(Dusp3),ENSMUSG00000004462(Tbccd1),ENSMUSG00000004530(Coro1c),ENSMUSG00000004698(Hdac9),ENSMUSG00000005583(Mef2c),ENSMUSG00000008855(Hdac5),ENSMUSG00000010047(Hyal2),ENSMUSG00000010051(Hyal1),ENSMUSG00000014158(Trpv4),ENSMUSG00000…
BP	GO:0044248	cellular catabolic process	267	242	509	2055	1.38424e-16	9.25132e-15	ENSMUSG00000000275(Trim25),ENSMUSG00000000628(Hk2),ENSMUSG00000001098(Kctd10),ENSMUSG00000001248(Gramd1a),ENSMUSG00000002227(Mov10),ENSMUSG00000002845(Tmem39a),ENSMUSG00000004040(Stat3),ENSMUSG00000004221(Ikbkg),ENSMUSG00000004446(Bid),ENSMUSG00000004936(Map2k1),ENSMUSG00000005087(Cd44),ENSMUSG00000005413(Hmox1),ENSMUSG00000005610(Eif4g2),ENSMUSG00000005686(Ampd3),ENSMUSG00000006418(Rnf114),ENSMU…	ENSMUSG00000000149(Gna12),ENSMUSG00000000326(Comt),ENSMUSG00000000869(Il4),ENSMUSG00000001054(Rmnd5b),ENSMUSG00000001228(Uhrf1),ENSMUSG00000003484(Cyp4f18),ENSMUSG00000003623(Crot),ENSMUSG00000003809(Gcdh),ENSMUSG00000003812(Dnase2a),ENSMUSG00000004768(Rab23),ENSMUSG00000004798(Ulk2),ENSMUSG00000005043(Sgsh),ENSMUSG00000005102(Eif2ak4),ENSMUSG00000005514(Por),ENSMUSG00000005682(Pan2),ENSMUSG00000…
BP	GO:0002819	regulation of adaptive immune response	48	29	77	170	1.40148e-16	9.32672e-15	ENSMUSG00000004266(Ptpn6),ENSMUSG00000004296(Il12b),ENSMUSG00000015316(Slamf1),ENSMUSG00000016496(Cd274),ENSMUSG00000017652(Cd40),ENSMUSG00000018899(Irf1),ENSMUSG00000019850(Tnfaip3),ENSMUSG00000020641(Rsad2),ENSMUSG00000022876(Samsn1),ENSMUSG00000024164(C3),ENSMUSG00000024339(Tap2),ENSMUSG00000024401(Tnf),ENSMUSG00000024402(Lta),ENSMUSG00000025383(Il23a),ENSMUSG00000025498(Irf7),ENSMUSG000000257…	ENSMUSG00000000693(Loxl3),ENSMUSG00000000869(Il4),ENSMUSG00000003882(Il7r),ENSMUSG00000005102(Eif2ak4),ENSMUSG00000005583(Mef2c),ENSMUSG00000006611(Hfe),ENSMUSG00000017550(Atad5),ENSMUSG00000017697(Ada),ENSMUSG00000018752(Tnfsfm13),ENSMUSG00000020101(Vsir),ENSMUSG00000020399(Havcr2),ENSMUSG00000024151(Msh2),ENSMUSG00000025880(Smad7),ENSMUSG00000026012(Cd28),ENSMUSG00000026471(Mr1),ENSMUSG00000029…
BP	GO:1901362	organic cyclic compound biosynthetic process	483	450	933	4172	1.49337e-16	9.89613e-15	ENSMUSG00000000078(Klf6),ENSMUSG00000000275(Trim25),ENSMUSG00000000317(Bcl6b),ENSMUSG00000000441(Raf1),ENSMUSG00000000532(Acvr1b),ENSMUSG00000000730(Dnmt3l),ENSMUSG00000000776(Polr3d),ENSMUSG00000000982(Ccl3),ENSMUSG00000001056(Nhp2),ENSMUSG00000001288(Rarg),ENSMUSG00000001416(Cct3),ENSMUSG00000001467(Cyp51),ENSMUSG00000001542(Ell2),ENSMUSG00000001627(Ifrd1),ENSMUSG00000001632(Brpf1),ENSMUSG00000…	ENSMUSG00000000028(Cdc45),ENSMUSG00000000037(Scml2),ENSMUSG00000000282(Mnt),ENSMUSG00000000440(Pparg),ENSMUSG00000000693(Loxl3),ENSMUSG00000000751(Rpa1),ENSMUSG00000000869(Il4),ENSMUSG00000001228(Uhrf1),ENSMUSG00000001552(Jup),ENSMUSG00000001755(Coasy),ENSMUSG00000001761(Smo),ENSMUSG00000002068(Ccne1),ENSMUSG00000002409(Dyrk1b),ENSMUSG00000002486(Tchp),ENSMUSG00000003282(Plag1),ENSMUSG00000003575…
BP	GO:0009056	catabolic process	302	271	573	2366	1.51485e-16	9.99612e-15	ENSMUSG00000000275(Trim25),ENSMUSG00000000628(Hk2),ENSMUSG00000000957(Mmp14),ENSMUSG00000001098(Kctd10),ENSMUSG00000001248(Gramd1a),ENSMUSG00000001467(Cyp51),ENSMUSG00000002227(Mov10),ENSMUSG00000002845(Tmem39a),ENSMUSG00000002847(Pla1a),ENSMUSG00000004040(Stat3),ENSMUSG00000004221(Ikbkg),ENSMUSG00000004446(Bid),ENSMUSG00000004936(Map2k1),ENSMUSG00000005087(Cd44),ENSMUSG00000005413(Hmox1),ENSMUSG…	ENSMUSG00000000149(Gna12),ENSMUSG00000000326(Comt),ENSMUSG00000000869(Il4),ENSMUSG00000001054(Rmnd5b),ENSMUSG00000001228(Uhrf1),ENSMUSG00000003484(Cyp4f18),ENSMUSG00000003623(Crot),ENSMUSG00000003809(Gcdh),ENSMUSG00000003812(Dnase2a),ENSMUSG00000004565(Pnpla6),ENSMUSG00000004768(Rab23),ENSMUSG00000004798(Ulk2),ENSMUSG00000005043(Sgsh),ENSMUSG00000005102(Eif2ak4),ENSMUSG00000005447(Pafah1b3),ENSMU…
BP	GO:0030154	cell differentiation	527	429	956	4293	1.80862e-16	1.18845e-14	ENSMUSG00000000317(Bcl6b),ENSMUSG00000000409(Lck),ENSMUSG00000000441(Raf1),ENSMUSG00000000532(Acvr1b),ENSMUSG00000000555(Itga5),ENSMUSG00000000730(Dnmt3l),ENSMUSG00000000957(Mmp14),ENSMUSG00000000982(Ccl3),ENSMUSG00000001052(Sec24b),ENSMUSG00000001123(Lgals9),ENSMUSG00000001288(Rarg),ENSMUSG00000001300(Efnb2),ENSMUSG00000001435(Col18a1),ENSMUSG00000001627(Ifrd1),ENSMUSG00000001632(Brpf1),ENSMUSG0…	ENSMUSG00000000149(Gna12),ENSMUSG00000000440(Pparg),ENSMUSG00000000693(Loxl3),ENSMUSG00000000869(Il4),ENSMUSG00000001227(Sema6b),ENSMUSG00000001751(Naglu),ENSMUSG00000001761(Smo),ENSMUSG00000002068(Ccne1),ENSMUSG00000002274(Metrn),ENSMUSG00000002409(Dyrk1b),ENSMUSG00000002803(Btbd6),ENSMUSG00000003282(Plag1),ENSMUSG00000003344(Btbd2),ENSMUSG00000003575(Crtc1),ENSMUSG00000003812(Dnase2a),ENSMUSG00…
BP	GO:0019438	aromatic compound biosynthetic process	467	440	907	4042	1.88683e-16	1.23465e-14	ENSMUSG00000000078(Klf6),ENSMUSG00000000275(Trim25),ENSMUSG00000000317(Bcl6b),ENSMUSG00000000441(Raf1),ENSMUSG00000000532(Acvr1b),ENSMUSG00000000730(Dnmt3l),ENSMUSG00000000776(Polr3d),ENSMUSG00000000982(Ccl3),ENSMUSG00000001056(Nhp2),ENSMUSG00000001288(Rarg),ENSMUSG00000001416(Cct3),ENSMUSG00000001542(Ell2),ENSMUSG00000001627(Ifrd1),ENSMUSG00000001632(Brpf1),ENSMUSG00000001785(Pwp1),ENSMUSG000000…	ENSMUSG00000000028(Cdc45),ENSMUSG00000000037(Scml2),ENSMUSG00000000282(Mnt),ENSMUSG00000000440(Pparg),ENSMUSG00000000693(Loxl3),ENSMUSG00000000751(Rpa1),ENSMUSG00000000869(Il4),ENSMUSG00000001228(Uhrf1),ENSMUSG00000001552(Jup),ENSMUSG00000001755(Coasy),ENSMUSG00000001761(Smo),ENSMUSG00000002068(Ccne1),ENSMUSG00000002409(Dyrk1b),ENSMUSG00000002486(Tchp),ENSMUSG00000003282(Plag1),ENSMUSG00000003575…
BP	GO:0030217	T cell differentiation	64	40	104	265	1.90546e-16	1.24165e-14	ENSMUSG00000000409(Lck),ENSMUSG00000001123(Lgals9),ENSMUSG00000002413(Braf),ENSMUSG00000002983(Relb),ENSMUSG00000004040(Stat3),ENSMUSG00000004043(Stat5a),ENSMUSG00000004296(Il12b),ENSMUSG00000006705(Pknox1),ENSMUSG00000015396(Cd83),ENSMUSG00000015605(Srf),ENSMUSG00000018899(Irf1),ENSMUSG00000019982(Myb),ENSMUSG00000020641(Rsad2),ENSMUSG00000021270(Hsp90aa1),ENSMUSG00000021457(Syk),ENSMUSG00000024…	ENSMUSG00000000693(Loxl3),ENSMUSG00000000869(Il4),ENSMUSG00000003882(Il7r),ENSMUSG00000017697(Ada),ENSMUSG00000020101(Vsir),ENSMUSG00000020453(Patz1),ENSMUSG00000020605(Hs1bp3),ENSMUSG00000021127(Zfp36l1),ENSMUSG00000021356(Irf4),ENSMUSG00000022672(Prkdc),ENSMUSG00000023927(Satb1),ENSMUSG00000025880(Smad7),ENSMUSG00000026012(Cd28),ENSMUSG00000026471(Mr1),ENSMUSG00000026842(Abl1),ENSMUSG0000002723…
BP	GO:1903555	regulation of tumor necrosis factor superfamily cytokine production	62	12	74	161	2.02987e-16	1.31723e-14	ENSMUSG00000000982(Ccl3),ENSMUSG00000001123(Lgals9),ENSMUSG00000001348(Acp5),ENSMUSG00000002602(Axl),ENSMUSG00000004040(Stat3),ENSMUSG00000004266(Ptpn6),ENSMUSG00000004296(Il12b),ENSMUSG00000015316(Slamf1),ENSMUSG00000015340(Cybb),ENSMUSG00000016496(Cd274),ENSMUSG00000016528(Mapkapk2),ENSMUSG00000016529(Il10),ENSMUSG00000018930(Ccl4),ENSMUSG00000019850(Tnfaip3),ENSMUSG00000020227(Irak3),ENSMUSG00…	ENSMUSG00000000869(Il4),ENSMUSG00000020101(Vsir),ENSMUSG00000020399(Havcr2),ENSMUSG00000022708(Zbtb20),ENSMUSG00000027843(Ptpn22),ENSMUSG00000031101(Sash3),ENSMUSG00000031451(Gas6),ENSMUSG00000039005(Tlr4),ENSMUSG00000049103(Ccr2),ENSMUSG00000049871(Nlrc3),ENSMUSG00000064177(Ghrl),ENSMUSG00000068923(Syt11)
BP	GO:0043122	regulation of I-kappaB kinase/NF-kappaB signaling	67	18	85	198	2.07043e-16	1.33799e-14	ENSMUSG00000000275(Trim25),ENSMUSG00000004221(Ikbkg),ENSMUSG00000015755(Tab2),ENSMUSG00000015837(Sqstm1),ENSMUSG00000017652(Cd40),ENSMUSG00000019842(Traf3ip2),ENSMUSG00000019850(Tnfaip3),ENSMUSG00000020075(Ddx21),ENSMUSG00000020115(Tbk1),ENSMUSG00000020134(Peli1),ENSMUSG00000020275(Rel),ENSMUSG00000020400(Tnip1),ENSMUSG00000021277(Traf3),ENSMUSG00000022026(Olfm4),ENSMUSG00000022255(Mtdh),ENSMUSG0…	ENSMUSG00000005150(Wdr83),ENSMUSG00000008305(Tle1),ENSMUSG00000019768(Esr1),ENSMUSG00000020889(Nr1d1),ENSMUSG00000023826(Prkn),ENSMUSG00000025507(Pidd1),ENSMUSG00000025736(Jmjd8),ENSMUSG00000026228(Htr2b),ENSMUSG00000026842(Abl1),ENSMUSG00000028756(Pink1),ENSMUSG00000029204(Rhoh),ENSMUSG00000032109(Nlrx1),ENSMUSG00000032238(Rora),ENSMUSG00000036526(Card11),ENSMUSG00000039005(Tlr4),ENSMUSG00000041…
BP	GO:0051241	negative regulation of multicellular organismal process	206	139	345	1287	2.12282e-16	1.3662e-14	ENSMUSG00000000982(Ccl3),ENSMUSG00000001123(Lgals9),ENSMUSG00000001288(Rarg),ENSMUSG00000001300(Efnb2),ENSMUSG00000001348(Acp5),ENSMUSG00000001467(Cyp51),ENSMUSG00000001627(Ifrd1),ENSMUSG00000002602(Axl),ENSMUSG00000002983(Relb),ENSMUSG00000003352(Cacnb3),ENSMUSG00000004040(Stat3),ENSMUSG00000004043(Stat5a),ENSMUSG00000004266(Ptpn6),ENSMUSG00000004296(Il12b),ENSMUSG00000005413(Hmox1),ENSMUSG00000…	ENSMUSG00000000326(Comt),ENSMUSG00000000440(Pparg),ENSMUSG00000000693(Loxl3),ENSMUSG00000000869(Il4),ENSMUSG00000001227(Sema6b),ENSMUSG00000001552(Jup),ENSMUSG00000001761(Smo),ENSMUSG00000004099(Dnmt1),ENSMUSG00000004530(Coro1c),ENSMUSG00000004698(Hdac9),ENSMUSG00000004798(Ulk2),ENSMUSG00000005102(Eif2ak4),ENSMUSG00000005583(Mef2c),ENSMUSG00000006611(Hfe),ENSMUSG00000008855(Hdac5),ENSMUSG00000010…
BP	GO:0071346	cellular response to interferon-gamma	53	8	61	120	2.31842e-16	1.48597e-14	ENSMUSG00000000982(Ccl3),ENSMUSG00000004296(Il12b),ENSMUSG00000006740(Kif5b),ENSMUSG00000018899(Irf1),ENSMUSG00000018930(Ccl4),ENSMUSG00000019122(Ccl9),ENSMUSG00000019471(Cdc37),ENSMUSG00000020826(Nos2),ENSMUSG00000021367(Edn1),ENSMUSG00000022346(Myc),ENSMUSG00000022504(Ciita),ENSMUSG00000022906(Parp9),ENSMUSG00000023460(Rab12),ENSMUSG00000024539(Ptpn2),ENSMUSG00000024789(Jak2),ENSMUSG00000025278…	ENSMUSG00000000440(Pparg),ENSMUSG00000000631(Myo18a),ENSMUSG00000020546(Stxbp4),ENSMUSG00000031988(Vps26b),ENSMUSG00000039005(Tlr4),ENSMUSG00000041515(Irf8),ENSMUSG00000051343(Rab11fip5),ENSMUSG00000052688(Rab7b)
BP	GO:0043408	regulation of MAPK cascade	124	92	216	715	2.54014e-16	1.62144e-14	ENSMUSG00000000441(Raf1),ENSMUSG00000000982(Ccl3),ENSMUSG00000002413(Braf),ENSMUSG00000004266(Ptpn6),ENSMUSG00000004936(Map2k1),ENSMUSG00000005087(Cd44),ENSMUSG00000007655(Cav1),ENSMUSG00000012519(Mlkl),ENSMUSG00000015312(Gadd45b),ENSMUSG00000015316(Slamf1),ENSMUSG00000017291(Taok1),ENSMUSG00000017652(Cd40),ENSMUSG00000018334(Ksr1),ENSMUSG00000018930(Ccl4),ENSMUSG00000019122(Ccl9),ENSMUSG00000020…	ENSMUSG00000003518(Dusp3),ENSMUSG00000005583(Mef2c),ENSMUSG00000006235(Epor),ENSMUSG00000010047(Hyal2),ENSMUSG00000014158(Trpv4),ENSMUSG00000014426(Map3k4),ENSMUSG00000017119(Nbr1),ENSMUSG00000017466(Timp2),ENSMUSG00000018669(Cdk5rap3),ENSMUSG00000018849(Wwc1),ENSMUSG00000019768(Esr1),ENSMUSG00000019960(Dusp6),ENSMUSG00000019966(Kitl),ENSMUSG00000020312(Shc2),ENSMUSG00000020399(Havcr2),ENSMUSG000…
BP	GO:0002822	regulation of adaptive immune response based on somatic recombination of immune receptors built from immunoglobulin superfamily domains	45	27	72	155	2.55339e-16	1.62327e-14	ENSMUSG00000004266(Ptpn6),ENSMUSG00000004296(Il12b),ENSMUSG00000015316(Slamf1),ENSMUSG00000016496(Cd274),ENSMUSG00000017652(Cd40),ENSMUSG00000018899(Irf1),ENSMUSG00000019850(Tnfaip3),ENSMUSG00000020641(Rsad2),ENSMUSG00000024164(C3),ENSMUSG00000024339(Tap2),ENSMUSG00000024401(Tnf),ENSMUSG00000024402(Lta),ENSMUSG00000025383(Il23a),ENSMUSG00000025746(Il6),ENSMUSG00000026395(Ptprc),ENSMUSG00000026399…	ENSMUSG00000000693(Loxl3),ENSMUSG00000000869(Il4),ENSMUSG00000003882(Il7r),ENSMUSG00000005583(Mef2c),ENSMUSG00000006611(Hfe),ENSMUSG00000017550(Atad5),ENSMUSG00000017697(Ada),ENSMUSG00000018752(Tnfsfm13),ENSMUSG00000020101(Vsir),ENSMUSG00000020399(Havcr2),ENSMUSG00000024151(Msh2),ENSMUSG00000025880(Smad7),ENSMUSG00000026012(Cd28),ENSMUSG00000026471(Mr1),ENSMUSG00000029468(P2rx7),ENSMUSG0000003005…
BP	GO:0010629	negative regulation of gene expression	274	234	508	2057	2.67795e-16	1.69557e-14	ENSMUSG00000000317(Bcl6b),ENSMUSG00000000532(Acvr1b),ENSMUSG00000000730(Dnmt3l),ENSMUSG00000000838(Fmr1),ENSMUSG00000000982(Ccl3),ENSMUSG00000001123(Lgals9),ENSMUSG00000001288(Rarg),ENSMUSG00000001348(Acp5),ENSMUSG00000002111(Spi1),ENSMUSG00000002227(Mov10),ENSMUSG00000002307(Daxx),ENSMUSG00000002602(Axl),ENSMUSG00000002881(Nab1),ENSMUSG00000002983(Relb),ENSMUSG00000004040(Stat3),ENSMUSG000000042…	ENSMUSG00000000028(Cdc45),ENSMUSG00000000037(Scml2),ENSMUSG00000000282(Mnt),ENSMUSG00000000440(Pparg),ENSMUSG00000000693(Loxl3),ENSMUSG00000000869(Il4),ENSMUSG00000001228(Uhrf1),ENSMUSG00000001761(Smo),ENSMUSG00000002068(Ccne1),ENSMUSG00000002731(Prkra),ENSMUSG00000003282(Plag1),ENSMUSG00000004099(Dnmt1),ENSMUSG00000004698(Hdac9),ENSMUSG00000005102(Eif2ak4),ENSMUSG00000005583(Mef2c),ENSMUSG000000…
BP	GO:0018130	heterocycle biosynthetic process	465	438	903	4028	2.9825e-16	1.88078e-14	ENSMUSG00000000078(Klf6),ENSMUSG00000000275(Trim25),ENSMUSG00000000317(Bcl6b),ENSMUSG00000000441(Raf1),ENSMUSG00000000532(Acvr1b),ENSMUSG00000000730(Dnmt3l),ENSMUSG00000000776(Polr3d),ENSMUSG00000000982(Ccl3),ENSMUSG00000001056(Nhp2),ENSMUSG00000001288(Rarg),ENSMUSG00000001416(Cct3),ENSMUSG00000001542(Ell2),ENSMUSG00000001627(Ifrd1),ENSMUSG00000001632(Brpf1),ENSMUSG00000001785(Pwp1),ENSMUSG000000…	ENSMUSG00000000028(Cdc45),ENSMUSG00000000037(Scml2),ENSMUSG00000000282(Mnt),ENSMUSG00000000440(Pparg),ENSMUSG00000000693(Loxl3),ENSMUSG00000000751(Rpa1),ENSMUSG00000000869(Il4),ENSMUSG00000001228(Uhrf1),ENSMUSG00000001552(Jup),ENSMUSG00000001755(Coasy),ENSMUSG00000001761(Smo),ENSMUSG00000002068(Ccne1),ENSMUSG00000002409(Dyrk1b),ENSMUSG00000002486(Tchp),ENSMUSG00000003282(Plag1),ENSMUSG00000003575…
BP	GO:0000165	MAPK cascade	133	97	230	777	3.45105e-16	2.15884e-14	ENSMUSG00000000441(Raf1),ENSMUSG00000000982(Ccl3),ENSMUSG00000002413(Braf),ENSMUSG00000004266(Ptpn6),ENSMUSG00000004936(Map2k1),ENSMUSG00000005087(Cd44),ENSMUSG00000007655(Cav1),ENSMUSG00000012519(Mlkl),ENSMUSG00000015312(Gadd45b),ENSMUSG00000015316(Slamf1),ENSMUSG00000016528(Mapkapk2),ENSMUSG00000017291(Taok1),ENSMUSG00000017652(Cd40),ENSMUSG00000018334(Ksr1),ENSMUSG00000018930(Ccl4),ENSMUSG0000…	ENSMUSG00000003518(Dusp3),ENSMUSG00000005583(Mef2c),ENSMUSG00000005893(Nr2c2),ENSMUSG00000006235(Epor),ENSMUSG00000010047(Hyal2),ENSMUSG00000014158(Trpv4),ENSMUSG00000014426(Map3k4),ENSMUSG00000017119(Nbr1),ENSMUSG00000017466(Timp2),ENSMUSG00000018669(Cdk5rap3),ENSMUSG00000018849(Wwc1),ENSMUSG00000019768(Esr1),ENSMUSG00000019960(Dusp6),ENSMUSG00000019966(Kitl),ENSMUSG00000020312(Shc2),ENSMUSG0000…
BP	GO:0023014	signal transduction by protein phosphorylation	133	97	230	777	3.45105e-16	2.15884e-14	ENSMUSG00000000441(Raf1),ENSMUSG00000000982(Ccl3),ENSMUSG00000002413(Braf),ENSMUSG00000004266(Ptpn6),ENSMUSG00000004936(Map2k1),ENSMUSG00000005087(Cd44),ENSMUSG00000007655(Cav1),ENSMUSG00000012519(Mlkl),ENSMUSG00000015312(Gadd45b),ENSMUSG00000015316(Slamf1),ENSMUSG00000016528(Mapkapk2),ENSMUSG00000017291(Taok1),ENSMUSG00000017652(Cd40),ENSMUSG00000018334(Ksr1),ENSMUSG00000018930(Ccl4),ENSMUSG0000…	ENSMUSG00000003518(Dusp3),ENSMUSG00000005583(Mef2c),ENSMUSG00000005893(Nr2c2),ENSMUSG00000006235(Epor),ENSMUSG00000010047(Hyal2),ENSMUSG00000014158(Trpv4),ENSMUSG00000014426(Map3k4),ENSMUSG00000017119(Nbr1),ENSMUSG00000017466(Timp2),ENSMUSG00000018669(Cdk5rap3),ENSMUSG00000018849(Wwc1),ENSMUSG00000019768(Esr1),ENSMUSG00000019960(Dusp6),ENSMUSG00000019966(Kitl),ENSMUSG00000020312(Shc2),ENSMUSG0000…
BP	GO:0032680	regulation of tumor necrosis factor production	61	12	73	159	3.48368e-16	2.17057e-14	ENSMUSG00000000982(Ccl3),ENSMUSG00000001123(Lgals9),ENSMUSG00000001348(Acp5),ENSMUSG00000002602(Axl),ENSMUSG00000004040(Stat3),ENSMUSG00000004266(Ptpn6),ENSMUSG00000004296(Il12b),ENSMUSG00000015316(Slamf1),ENSMUSG00000015340(Cybb),ENSMUSG00000016528(Mapkapk2),ENSMUSG00000016529(Il10),ENSMUSG00000018930(Ccl4),ENSMUSG00000019850(Tnfaip3),ENSMUSG00000020227(Irak3),ENSMUSG00000021457(Syk),ENSMUSG0000…	ENSMUSG00000000869(Il4),ENSMUSG00000020101(Vsir),ENSMUSG00000020399(Havcr2),ENSMUSG00000022708(Zbtb20),ENSMUSG00000027843(Ptpn22),ENSMUSG00000031101(Sash3),ENSMUSG00000031451(Gas6),ENSMUSG00000039005(Tlr4),ENSMUSG00000049103(Ccr2),ENSMUSG00000049871(Nlrc3),ENSMUSG00000064177(Ghrl),ENSMUSG00000068923(Syt11)
BP	GO:0050863	regulation of T cell activation	76	39	115	308	3.76172e-16	2.3345e-14	ENSMUSG00000000409(Lck),ENSMUSG00000000732(Icosl),ENSMUSG00000001123(Lgals9),ENSMUSG00000001300(Efnb2),ENSMUSG00000002413(Braf),ENSMUSG00000004043(Stat5a),ENSMUSG00000004266(Ptpn6),ENSMUSG00000004296(Il12b),ENSMUSG00000004709(Cd244a),ENSMUSG00000007655(Cav1),ENSMUSG00000015316(Slamf1),ENSMUSG00000015396(Cd83),ENSMUSG00000016496(Cd274),ENSMUSG00000017009(Sdc4),ENSMUSG00000018899(Irf1),ENSMUSG00000…	ENSMUSG00000000693(Loxl3),ENSMUSG00000000869(Il4),ENSMUSG00000003518(Dusp3),ENSMUSG00000003882(Il7r),ENSMUSG00000006611(Hfe),ENSMUSG00000013707(Tnfaip8l2),ENSMUSG00000017697(Ada),ENSMUSG00000020101(Vsir),ENSMUSG00000020399(Havcr2),ENSMUSG00000021756(Il6st),ENSMUSG00000023915(Tnfrsf21),ENSMUSG00000025880(Smad7),ENSMUSG00000026012(Cd28),ENSMUSG00000026842(Abl1),ENSMUSG00000027239(Mdk),ENSMUSG000000…
BP	GO:0071706	tumor necrosis factor superfamily cytokine production	62	12	74	163	4.67037e-16	2.88695e-14	ENSMUSG00000000982(Ccl3),ENSMUSG00000001123(Lgals9),ENSMUSG00000001348(Acp5),ENSMUSG00000002602(Axl),ENSMUSG00000004040(Stat3),ENSMUSG00000004266(Ptpn6),ENSMUSG00000004296(Il12b),ENSMUSG00000015316(Slamf1),ENSMUSG00000015340(Cybb),ENSMUSG00000016496(Cd274),ENSMUSG00000016528(Mapkapk2),ENSMUSG00000016529(Il10),ENSMUSG00000018930(Ccl4),ENSMUSG00000019850(Tnfaip3),ENSMUSG00000020227(Irak3),ENSMUSG00…	ENSMUSG00000000869(Il4),ENSMUSG00000020101(Vsir),ENSMUSG00000020399(Havcr2),ENSMUSG00000022708(Zbtb20),ENSMUSG00000027843(Ptpn22),ENSMUSG00000031101(Sash3),ENSMUSG00000031451(Gas6),ENSMUSG00000039005(Tlr4),ENSMUSG00000049103(Ccr2),ENSMUSG00000049871(Nlrc3),ENSMUSG00000064177(Ghrl),ENSMUSG00000068923(Syt11)
BP	GO:0034641	cellular nitrogen compound metabolic process	679	633	1312	6174	5.09526e-16	3.1372e-14	ENSMUSG00000000078(Klf6),ENSMUSG00000000275(Trim25),ENSMUSG00000000317(Bcl6b),ENSMUSG00000000441(Raf1),ENSMUSG00000000532(Acvr1b),ENSMUSG00000000628(Hk2),ENSMUSG00000000730(Dnmt3l),ENSMUSG00000000732(Icosl),ENSMUSG00000000776(Polr3d),ENSMUSG00000000838(Fmr1),ENSMUSG00000000982(Ccl3),ENSMUSG00000001056(Nhp2),ENSMUSG00000001288(Rarg),ENSMUSG00000001305(Rrp15),ENSMUSG00000001348(Acp5),ENSMUSG0000000…	ENSMUSG00000000028(Cdc45),ENSMUSG00000000037(Scml2),ENSMUSG00000000253(Gmpr),ENSMUSG00000000282(Mnt),ENSMUSG00000000326(Comt),ENSMUSG00000000440(Pparg),ENSMUSG00000000693(Loxl3),ENSMUSG00000000751(Rpa1),ENSMUSG00000000869(Il4),ENSMUSG00000001228(Uhrf1),ENSMUSG00000001552(Jup),ENSMUSG00000001665(Gstt3),ENSMUSG00000001755(Coasy),ENSMUSG00000001761(Smo),ENSMUSG00000002068(Ccne1),ENSMUSG00000002107(C…
BP	GO:0034654	nucleobase-containing compound biosynthetic process	457	431	888	3963	6.83687e-16	4.19301e-14	ENSMUSG00000000078(Klf6),ENSMUSG00000000275(Trim25),ENSMUSG00000000317(Bcl6b),ENSMUSG00000000441(Raf1),ENSMUSG00000000532(Acvr1b),ENSMUSG00000000730(Dnmt3l),ENSMUSG00000000776(Polr3d),ENSMUSG00000000982(Ccl3),ENSMUSG00000001056(Nhp2),ENSMUSG00000001288(Rarg),ENSMUSG00000001416(Cct3),ENSMUSG00000001542(Ell2),ENSMUSG00000001627(Ifrd1),ENSMUSG00000001632(Brpf1),ENSMUSG00000001785(Pwp1),ENSMUSG000000…	ENSMUSG00000000028(Cdc45),ENSMUSG00000000037(Scml2),ENSMUSG00000000282(Mnt),ENSMUSG00000000440(Pparg),ENSMUSG00000000693(Loxl3),ENSMUSG00000000751(Rpa1),ENSMUSG00000000869(Il4),ENSMUSG00000001228(Uhrf1),ENSMUSG00000001552(Jup),ENSMUSG00000001755(Coasy),ENSMUSG00000001761(Smo),ENSMUSG00000002068(Ccne1),ENSMUSG00000002409(Dyrk1b),ENSMUSG00000002486(Tchp),ENSMUSG00000003282(Plag1),ENSMUSG00000003575…
BP	GO:0009059	macromolecule biosynthetic process	534	504	1038	4739	7.71474e-16	4.71292e-14	ENSMUSG00000000078(Klf6),ENSMUSG00000000275(Trim25),ENSMUSG00000000317(Bcl6b),ENSMUSG00000000441(Raf1),ENSMUSG00000000532(Acvr1b),ENSMUSG00000000730(Dnmt3l),ENSMUSG00000000776(Polr3d),ENSMUSG00000000838(Fmr1),ENSMUSG00000000982(Ccl3),ENSMUSG00000001056(Nhp2),ENSMUSG00000001288(Rarg),ENSMUSG00000001416(Cct3),ENSMUSG00000001542(Ell2),ENSMUSG00000001627(Ifrd1),ENSMUSG00000001632(Brpf1),ENSMUSG000000…	ENSMUSG00000000028(Cdc45),ENSMUSG00000000037(Scml2),ENSMUSG00000000282(Mnt),ENSMUSG00000000440(Pparg),ENSMUSG00000000693(Loxl3),ENSMUSG00000000751(Rpa1),ENSMUSG00000000869(Il4),ENSMUSG00000001228(Uhrf1),ENSMUSG00000001552(Jup),ENSMUSG00000001761(Smo),ENSMUSG00000002068(Ccne1),ENSMUSG00000002409(Dyrk1b),ENSMUSG00000002486(Tchp),ENSMUSG00000002835(Chaf1a),ENSMUSG00000002870(Mcm2),ENSMUSG00000003282…
BP	GO:0032640	tumor necrosis factor production	61	12	73	161	7.99924e-16	4.86771e-14	ENSMUSG00000000982(Ccl3),ENSMUSG00000001123(Lgals9),ENSMUSG00000001348(Acp5),ENSMUSG00000002602(Axl),ENSMUSG00000004040(Stat3),ENSMUSG00000004266(Ptpn6),ENSMUSG00000004296(Il12b),ENSMUSG00000015316(Slamf1),ENSMUSG00000015340(Cybb),ENSMUSG00000016528(Mapkapk2),ENSMUSG00000016529(Il10),ENSMUSG00000018930(Ccl4),ENSMUSG00000019850(Tnfaip3),ENSMUSG00000020227(Irak3),ENSMUSG00000021457(Syk),ENSMUSG0000…	ENSMUSG00000000869(Il4),ENSMUSG00000020101(Vsir),ENSMUSG00000020399(Havcr2),ENSMUSG00000022708(Zbtb20),ENSMUSG00000027843(Ptpn22),ENSMUSG00000031101(Sash3),ENSMUSG00000031451(Gas6),ENSMUSG00000039005(Tlr4),ENSMUSG00000049103(Ccr2),ENSMUSG00000049871(Nlrc3),ENSMUSG00000064177(Ghrl),ENSMUSG00000068923(Syt11)
BP	GO:0030098	lymphocyte differentiation	83	51	134	384	8.37077e-16	5.07405e-14	ENSMUSG00000000409(Lck),ENSMUSG00000000957(Mmp14),ENSMUSG00000001123(Lgals9),ENSMUSG00000002111(Spi1),ENSMUSG00000002413(Braf),ENSMUSG00000002602(Axl),ENSMUSG00000002983(Relb),ENSMUSG00000004040(Stat3),ENSMUSG00000004043(Stat5a),ENSMUSG00000004266(Ptpn6),ENSMUSG00000004296(Il12b),ENSMUSG00000006705(Pknox1),ENSMUSG00000008496(Pou2f2),ENSMUSG00000013846(St3gal1),ENSMUSG00000014773(Dll1),ENSMUSG0000…	ENSMUSG00000000693(Loxl3),ENSMUSG00000000869(Il4),ENSMUSG00000003882(Il7r),ENSMUSG00000010054(Tusc2),ENSMUSG00000014361(Mertk),ENSMUSG00000014905(Dnajb9),ENSMUSG00000017697(Ada),ENSMUSG00000020101(Vsir),ENSMUSG00000020453(Patz1),ENSMUSG00000020605(Hs1bp3),ENSMUSG00000021127(Zfp36l1),ENSMUSG00000021356(Irf4),ENSMUSG00000022672(Prkdc),ENSMUSG00000023927(Satb1),ENSMUSG00000024151(Msh2),ENSMUSG000000…
CC	GO:0005813	centrosome	66	122	188	604	8.43312e-16	5.09211e-14	ENSMUSG00000000409(Lck),ENSMUSG00000000628(Hk2),ENSMUSG00000001175(Calm1),ENSMUSG00000002812(Flii),ENSMUSG00000002983(Relb),ENSMUSG00000002997(Prkar2b),ENSMUSG00000004591(Pkn2),ENSMUSG00000005732(Ranbp1),ENSMUSG00000006740(Kif5b),ENSMUSG00000015839(Nfe2l2),ENSMUSG00000016528(Mapkapk2),ENSMUSG00000018707(Dync1h1),ENSMUSG00000018736(Ndel1),ENSMUSG00000019794(Katna1),ENSMUSG00000020271(Fbxw11),ENSMU…	ENSMUSG00000000028(Cdc45),ENSMUSG00000002031(Ift46),ENSMUSG00000002055(Spag5),ENSMUSG00000002068(Ccne1),ENSMUSG00000002104(Rapsn),ENSMUSG00000002486(Tchp),ENSMUSG00000003282(Plag1),ENSMUSG00000003452(Bicd1),ENSMUSG00000004462(Tbccd1),ENSMUSG00000004768(Rab23),ENSMUSG00000005699(Pard6a),ENSMUSG00000006464(Bbs1),ENSMUSG00000012609(Ttll5),ENSMUSG00000012819(Cdh23),ENSMUSG00000015971(Actr8),ENSMUSG00…
BP	GO:0048513	animal organ development	448	365	813	3584	8.74603e-16	5.26074e-14	ENSMUSG00000000409(Lck),ENSMUSG00000000441(Raf1),ENSMUSG00000000532(Acvr1b),ENSMUSG00000000628(Hk2),ENSMUSG00000000730(Dnmt3l),ENSMUSG00000000957(Mmp14),ENSMUSG00000000982(Ccl3),ENSMUSG00000001052(Sec24b),ENSMUSG00000001098(Kctd10),ENSMUSG00000001123(Lgals9),ENSMUSG00000001288(Rarg),ENSMUSG00000001300(Efnb2),ENSMUSG00000001348(Acp5),ENSMUSG00000002111(Spi1),ENSMUSG00000002413(Braf),ENSMUSG0000000…	ENSMUSG00000000440(Pparg),ENSMUSG00000000693(Loxl3),ENSMUSG00000000751(Rpa1),ENSMUSG00000000869(Il4),ENSMUSG00000001227(Sema6b),ENSMUSG00000001552(Jup),ENSMUSG00000001751(Naglu),ENSMUSG00000001761(Smo),ENSMUSG00000002409(Dyrk1b),ENSMUSG00000002731(Prkra),ENSMUSG00000002870(Mcm2),ENSMUSG00000003282(Plag1),ENSMUSG00000003812(Dnase2a),ENSMUSG00000003882(Il7r),ENSMUSG00000004151(Etv1),ENSMUSG00000004…
BP	GO:0002250	adaptive immune response	92	45	137	396	8.84145e-16	5.29776e-14	ENSMUSG00000000732(Icosl),ENSMUSG00000002897(Il17ra),ENSMUSG00000002983(Relb),ENSMUSG00000004040(Stat3),ENSMUSG00000004266(Ptpn6),ENSMUSG00000004296(Il12b),ENSMUSG00000004709(Cd244a),ENSMUSG00000004730(Adgre1),ENSMUSG00000005763(Cd247),ENSMUSG00000011008(Mcoln2),ENSMUSG00000015316(Slamf1),ENSMUSG00000016496(Cd274),ENSMUSG00000017652(Cd40),ENSMUSG00000018899(Irf1),ENSMUSG00000019850(Tnfaip3),ENSMU…	ENSMUSG00000000693(Loxl3),ENSMUSG00000000869(Il4),ENSMUSG00000003882(Il7r),ENSMUSG00000005102(Eif2ak4),ENSMUSG00000005370(Msh6),ENSMUSG00000005583(Mef2c),ENSMUSG00000006611(Hfe),ENSMUSG00000017550(Atad5),ENSMUSG00000017697(Ada),ENSMUSG00000018752(Tnfsfm13),ENSMUSG00000020101(Vsir),ENSMUSG00000020399(Havcr2),ENSMUSG00000021356(Irf4),ENSMUSG00000023915(Tnfrsf21),ENSMUSG00000023990(Tfeb),ENSMUSG0000…
BP	GO:0071900	regulation of protein serine/threonine kinase activity	88	68	156	472	9.22662e-16	5.50745e-14	ENSMUSG00000000184(Ccnd2),ENSMUSG00000000441(Raf1),ENSMUSG00000001123(Lgals9),ENSMUSG00000002413(Braf),ENSMUSG00000002997(Prkar2b),ENSMUSG00000004266(Ptpn6),ENSMUSG00000004936(Map2k1),ENSMUSG00000007655(Cav1),ENSMUSG00000012519(Mlkl),ENSMUSG00000015312(Gadd45b),ENSMUSG00000017291(Taok1),ENSMUSG00000017652(Cd40),ENSMUSG00000018334(Ksr1),ENSMUSG00000018796(Acsl1),ENSMUSG00000019850(Tnfaip3),ENSMUSG…	ENSMUSG00000002068(Ccne1),ENSMUSG00000003518(Dusp3),ENSMUSG00000005583(Mef2c),ENSMUSG00000005718(Tfap4),ENSMUSG00000010047(Hyal2),ENSMUSG00000014426(Map3k4),ENSMUSG00000016984(Etaa1),ENSMUSG00000018669(Cdk5rap3),ENSMUSG00000019876(Pkib),ENSMUSG00000019960(Dusp6),ENSMUSG00000019966(Kitl),ENSMUSG00000020312(Shc2),ENSMUSG00000020623(Map2k6),ENSMUSG00000020888(Dvl2),ENSMUSG00000021253(Tgfb3),ENSMUSG0…
BP	GO:0022409	positive regulation of cell-cell adhesion	68	31	99	252	9.30025e-16	5.53029e-14	ENSMUSG00000000409(Lck),ENSMUSG00000000732(Icosl),ENSMUSG00000001123(Lgals9),ENSMUSG00000001300(Efnb2),ENSMUSG00000004043(Stat5a),ENSMUSG00000004296(Il12b),ENSMUSG00000004709(Cd244a),ENSMUSG00000005087(Cd44),ENSMUSG00000007655(Cav1),ENSMUSG00000015316(Slamf1),ENSMUSG00000015396(Cd83),ENSMUSG00000016496(Cd274),ENSMUSG00000018899(Irf1),ENSMUSG00000019982(Myb),ENSMUSG00000021270(Hsp90aa1),ENSMUSG000…	ENSMUSG00000000869(Il4),ENSMUSG00000003882(Il7r),ENSMUSG00000017697(Ada),ENSMUSG00000020101(Vsir),ENSMUSG00000020399(Havcr2),ENSMUSG00000021756(Il6st),ENSMUSG00000022367(Has2),ENSMUSG00000025880(Smad7),ENSMUSG00000026012(Cd28),ENSMUSG00000026585(Kifap3),ENSMUSG00000027111(Itga6),ENSMUSG00000027239(Mdk),ENSMUSG00000027843(Ptpn22),ENSMUSG00000029204(Rhoh),ENSMUSG00000029869(Ephb6),ENSMUSG0000003052…
BP	GO:0042127	regulation of cell population proliferation	244	186	430	1697	9.61293e-16	5.69457e-14	ENSMUSG00000000184(Ccnd2),ENSMUSG00000000317(Bcl6b),ENSMUSG00000000409(Lck),ENSMUSG00000000441(Raf1),ENSMUSG00000000732(Icosl),ENSMUSG00000001123(Lgals9),ENSMUSG00000001288(Rarg),ENSMUSG00000001300(Efnb2),ENSMUSG00000001435(Col18a1),ENSMUSG00000001632(Brpf1),ENSMUSG00000001707(Eef1e1),ENSMUSG00000002413(Braf),ENSMUSG00000003283(Hck),ENSMUSG00000004040(Stat3),ENSMUSG00000004043(Stat5a),ENSMUSG0000…	ENSMUSG00000000149(Gna12),ENSMUSG00000000326(Comt),ENSMUSG00000000440(Pparg),ENSMUSG00000000751(Rpa1),ENSMUSG00000000869(Il4),ENSMUSG00000001228(Uhrf1),ENSMUSG00000001552(Jup),ENSMUSG00000001761(Smo),ENSMUSG00000002068(Ccne1),ENSMUSG00000002731(Prkra),ENSMUSG00000003282(Plag1),ENSMUSG00000003882(Il7r),ENSMUSG00000004099(Dnmt1),ENSMUSG00000005514(Por),ENSMUSG00000005583(Mef2c),ENSMUSG00000005718(T…
BP	GO:0048514	blood vessel morphogenesis	114	78	192	621	9.79329e-16	5.77952e-14	ENSMUSG00000000555(Itga5),ENSMUSG00000000628(Hk2),ENSMUSG00000000957(Mmp14),ENSMUSG00000001052(Sec24b),ENSMUSG00000001098(Kctd10),ENSMUSG00000001300(Efnb2),ENSMUSG00000001435(Col18a1),ENSMUSG00000001632(Brpf1),ENSMUSG00000002111(Spi1),ENSMUSG00000004040(Stat3),ENSMUSG00000004296(Il12b),ENSMUSG00000005413(Hmox1),ENSMUSG00000006705(Pknox1),ENSMUSG00000007655(Cav1),ENSMUSG00000013076(Amotl1),ENSMUSG…	ENSMUSG00000000440(Pparg),ENSMUSG00000001552(Jup),ENSMUSG00000001761(Smo),ENSMUSG00000002289(Angptl4),ENSMUSG00000004105(Angptl2),ENSMUSG00000004565(Pnpla6),ENSMUSG00000004698(Hdac9),ENSMUSG00000005958(Ephb3),ENSMUSG00000006235(Epor),ENSMUSG00000008855(Hdac5),ENSMUSG00000010051(Hyal1),ENSMUSG00000015846(Rxra),ENSMUSG00000016933(Plcg1),ENSMUSG00000017146(Brca1),ENSMUSG00000017417(Plxdc1),ENSMUSG00…
BP	GO:0042592	homeostatic process	256	212	468	1880	1.16905e-15	6.87321e-14	ENSMUSG00000000409(Lck),ENSMUSG00000000441(Raf1),ENSMUSG00000000532(Acvr1b),ENSMUSG00000000628(Hk2),ENSMUSG00000000682(Cd52),ENSMUSG00000000982(Ccl3),ENSMUSG00000001056(Nhp2),ENSMUSG00000001175(Calm1),ENSMUSG00000001348(Acp5),ENSMUSG00000001416(Cct3),ENSMUSG00000002105(Slc39a13),ENSMUSG00000002111(Spi1),ENSMUSG00000002602(Axl),ENSMUSG00000003352(Cacnb3),ENSMUSG00000003617(Cp),ENSMUSG00000003849(N…	ENSMUSG00000000326(Comt),ENSMUSG00000000440(Pparg),ENSMUSG00000000751(Rpa1),ENSMUSG00000000869(Il4),ENSMUSG00000001482(Def8),ENSMUSG00000001761(Smo),ENSMUSG00000002068(Ccne1),ENSMUSG00000002083(Bbc3),ENSMUSG00000002289(Angptl4),ENSMUSG00000003378(Grik5),ENSMUSG00000003575(Crtc1),ENSMUSG00000003812(Dnase2a),ENSMUSG00000003882(Il7r),ENSMUSG00000004347(Pde1c),ENSMUSG00000004698(Hdac9),ENSMUSG0000000…
BP	GO:1902107	positive regulation of leukocyte differentiation	49	27	76	172	1.18441e-15	6.93747e-14	ENSMUSG00000000409(Lck),ENSMUSG00000000957(Mmp14),ENSMUSG00000000982(Ccl3),ENSMUSG00000001123(Lgals9),ENSMUSG00000002602(Axl),ENSMUSG00000004043(Stat5a),ENSMUSG00000004296(Il12b),ENSMUSG00000014599(Csf1),ENSMUSG00000015396(Cd83),ENSMUSG00000016529(Il10),ENSMUSG00000018899(Irf1),ENSMUSG00000019982(Myb),ENSMUSG00000021270(Hsp90aa1),ENSMUSG00000021457(Syk),ENSMUSG00000022831(Hcls1),ENSMUSG0000002320…	ENSMUSG00000000869(Il4),ENSMUSG00000003882(Il7r),ENSMUSG00000017697(Ada),ENSMUSG00000019966(Kitl),ENSMUSG00000020101(Vsir),ENSMUSG00000020689(Itgb3),ENSMUSG00000021127(Zfp36l1),ENSMUSG00000021250(Fos),ENSMUSG00000022105(Rb1),ENSMUSG00000022672(Prkdc),ENSMUSG00000026288(Inpp5d),ENSMUSG00000027239(Mdk),ENSMUSG00000028988(Ctnnbip1),ENSMUSG00000029204(Rhoh),ENSMUSG00000031101(Sash3),ENSMUSG0000003145…
BP	GO:0065008	regulation of biological quality	486	393	879	3925	1.20172e-15	7.0126e-14	ENSMUSG00000000409(Lck),ENSMUSG00000000441(Raf1),ENSMUSG00000000532(Acvr1b),ENSMUSG00000000628(Hk2),ENSMUSG00000000682(Cd52),ENSMUSG00000000915(Hip1r),ENSMUSG00000000982(Ccl3),ENSMUSG00000001056(Nhp2),ENSMUSG00000001123(Lgals9),ENSMUSG00000001175(Calm1),ENSMUSG00000001300(Efnb2),ENSMUSG00000001348(Acp5),ENSMUSG00000001416(Cct3),ENSMUSG00000001627(Ifrd1),ENSMUSG00000002105(Slc39a13),ENSMUSG0000000…	ENSMUSG00000000149(Gna12),ENSMUSG00000000326(Comt),ENSMUSG00000000440(Pparg),ENSMUSG00000000751(Rpa1),ENSMUSG00000000869(Il4),ENSMUSG00000000881(Dlg3),ENSMUSG00000001227(Sema6b),ENSMUSG00000001482(Def8),ENSMUSG00000001552(Jup),ENSMUSG00000001761(Smo),ENSMUSG00000001865(Cpa3),ENSMUSG00000002031(Ift46),ENSMUSG00000002068(Ccne1),ENSMUSG00000002083(Bbc3),ENSMUSG00000002104(Rapsn),ENSMUSG00000002289(A…
BP	GO:0009653	anatomical structure morphogenesis	347	285	632	2680	1.21008e-15	7.03514e-14	ENSMUSG00000000555(Itga5),ENSMUSG00000000628(Hk2),ENSMUSG00000000957(Mmp14),ENSMUSG00000000982(Ccl3),ENSMUSG00000001052(Sec24b),ENSMUSG00000001098(Kctd10),ENSMUSG00000001288(Rarg),ENSMUSG00000001300(Efnb2),ENSMUSG00000001348(Acp5),ENSMUSG00000001435(Col18a1),ENSMUSG00000001627(Ifrd1),ENSMUSG00000001632(Brpf1),ENSMUSG00000002111(Spi1),ENSMUSG00000002227(Mov10),ENSMUSG00000002233(Rhoc),ENSMUSG00000…	ENSMUSG00000000149(Gna12),ENSMUSG00000000440(Pparg),ENSMUSG00000000869(Il4),ENSMUSG00000000881(Dlg3),ENSMUSG00000001227(Sema6b),ENSMUSG00000001552(Jup),ENSMUSG00000001751(Naglu),ENSMUSG00000001761(Smo),ENSMUSG00000002274(Metrn),ENSMUSG00000002289(Angptl4),ENSMUSG00000002409(Dyrk1b),ENSMUSG00000002731(Prkra),ENSMUSG00000003282(Plag1),ENSMUSG00000003882(Il7r),ENSMUSG00000004105(Angptl2),ENSMUSG0000…
BP	GO:0009891	positive regulation of biosynthetic process	274	218	492	1996	1.25122e-15	7.24734e-14	ENSMUSG00000000078(Klf6),ENSMUSG00000000275(Trim25),ENSMUSG00000000441(Raf1),ENSMUSG00000000532(Acvr1b),ENSMUSG00000000982(Ccl3),ENSMUSG00000001288(Rarg),ENSMUSG00000001416(Cct3),ENSMUSG00000001542(Ell2),ENSMUSG00000001627(Ifrd1),ENSMUSG00000001632(Brpf1),ENSMUSG00000001785(Pwp1),ENSMUSG00000002111(Spi1),ENSMUSG00000002307(Daxx),ENSMUSG00000002658(Gtf2f1),ENSMUSG00000002983(Relb),ENSMUSG000000040…	ENSMUSG00000000440(Pparg),ENSMUSG00000000869(Il4),ENSMUSG00000001552(Jup),ENSMUSG00000001761(Smo),ENSMUSG00000002409(Dyrk1b),ENSMUSG00000003282(Plag1),ENSMUSG00000003575(Crtc1),ENSMUSG00000003992(Ssbp2),ENSMUSG00000004151(Etv1),ENSMUSG00000005102(Eif2ak4),ENSMUSG00000005514(Por),ENSMUSG00000005583(Mef2c),ENSMUSG00000005718(Tfap4),ENSMUSG00000005893(Nr2c2),ENSMUSG00000006288(Ttc5),ENSMUSG000000088…
BP	GO:0045088	regulation of innate immune response	66	12	78	179	1.29544e-15	7.47581e-14	ENSMUSG00000000776(Polr3d),ENSMUSG00000001123(Lgals9),ENSMUSG00000004043(Stat5a),ENSMUSG00000004296(Il12b),ENSMUSG00000010358(Ifi35),ENSMUSG00000017776(Crk),ENSMUSG00000017830(Dhx58),ENSMUSG00000018899(Irf1),ENSMUSG00000019471(Cdc37),ENSMUSG00000019850(Tnfaip3),ENSMUSG00000020115(Tbk1),ENSMUSG00000020227(Irak3),ENSMUSG00000021270(Hsp90aa1),ENSMUSG00000021938(Pspc1),ENSMUSG00000022752(Tomm70a),ENS…	ENSMUSG00000000440(Pparg),ENSMUSG00000020263(Appl2),ENSMUSG00000020399(Havcr2),ENSMUSG00000022471(Xrcc6),ENSMUSG00000022672(Prkdc),ENSMUSG00000024349(Sting1),ENSMUSG00000026187(Xrcc5),ENSMUSG00000032109(Nlrx1),ENSMUSG00000035834(Polr3g),ENSMUSG00000039005(Tlr4),ENSMUSG00000039384(Dusp10),ENSMUSG00000049871(Nlrc3)
BP	GO:0034645	cellular macromolecule biosynthetic process	528	500	1028	4701	1.9053e-15	1.09314e-13	ENSMUSG00000000078(Klf6),ENSMUSG00000000275(Trim25),ENSMUSG00000000317(Bcl6b),ENSMUSG00000000441(Raf1),ENSMUSG00000000532(Acvr1b),ENSMUSG00000000730(Dnmt3l),ENSMUSG00000000776(Polr3d),ENSMUSG00000000838(Fmr1),ENSMUSG00000000982(Ccl3),ENSMUSG00000001056(Nhp2),ENSMUSG00000001288(Rarg),ENSMUSG00000001416(Cct3),ENSMUSG00000001542(Ell2),ENSMUSG00000001627(Ifrd1),ENSMUSG00000001632(Brpf1),ENSMUSG000000…	ENSMUSG00000000028(Cdc45),ENSMUSG00000000037(Scml2),ENSMUSG00000000282(Mnt),ENSMUSG00000000440(Pparg),ENSMUSG00000000693(Loxl3),ENSMUSG00000000751(Rpa1),ENSMUSG00000000869(Il4),ENSMUSG00000001228(Uhrf1),ENSMUSG00000001552(Jup),ENSMUSG00000001761(Smo),ENSMUSG00000002068(Ccne1),ENSMUSG00000002409(Dyrk1b),ENSMUSG00000002486(Tchp),ENSMUSG00000002835(Chaf1a),ENSMUSG00000002870(Mcm2),ENSMUSG00000003282…
BP	GO:0062207	regulation of pattern recognition receptor signaling pathway	36	14	50	91	1.90822e-15	1.09314e-13	ENSMUSG00000007655(Cav1),ENSMUSG00000010358(Ifi35),ENSMUSG00000017830(Dhx58),ENSMUSG00000018899(Irf1),ENSMUSG00000019850(Tnfaip3),ENSMUSG00000020134(Peli1),ENSMUSG00000020227(Irak3),ENSMUSG00000020641(Rsad2),ENSMUSG00000022892(App),ENSMUSG00000024404(Riok3),ENSMUSG00000024737(Slc15a3),ENSMUSG00000025017(Pik3ap1),ENSMUSG00000025058(Tasl),ENSMUSG00000025498(Irf7),ENSMUSG00000026883(Dab2ip),ENSMUSG0…	ENSMUSG00000019768(Esr1),ENSMUSG00000020263(Appl2),ENSMUSG00000020889(Nr1d1),ENSMUSG00000021356(Irf4),ENSMUSG00000027843(Ptpn22),ENSMUSG00000032109(Nlrx1),ENSMUSG00000034652(Cd300a),ENSMUSG00000035900(Gramd4),ENSMUSG00000039005(Tlr4),ENSMUSG00000047798(Cd300lf),ENSMUSG00000050132(Sarm1),ENSMUSG00000052688(Rab7b),ENSMUSG00000070056(Mfhas1),ENSMUSG00000073643(Wdfy1)
BP	GO:0001944	vasculature development	128	92	220	745	2.08194e-15	1.18398e-13	ENSMUSG00000000555(Itga5),ENSMUSG00000000628(Hk2),ENSMUSG00000000957(Mmp14),ENSMUSG00000001052(Sec24b),ENSMUSG00000001098(Kctd10),ENSMUSG00000001300(Efnb2),ENSMUSG00000001435(Col18a1),ENSMUSG00000001632(Brpf1),ENSMUSG00000002111(Spi1),ENSMUSG00000004040(Stat3),ENSMUSG00000004296(Il12b),ENSMUSG00000004936(Map2k1),ENSMUSG00000005413(Hmox1),ENSMUSG00000006705(Pknox1),ENSMUSG00000006818(Sod2),ENSMUSG…	ENSMUSG00000000440(Pparg),ENSMUSG00000001552(Jup),ENSMUSG00000001761(Smo),ENSMUSG00000002289(Angptl4),ENSMUSG00000004099(Dnmt1),ENSMUSG00000004105(Angptl2),ENSMUSG00000004565(Pnpla6),ENSMUSG00000004698(Hdac9),ENSMUSG00000005583(Mef2c),ENSMUSG00000005958(Ephb3),ENSMUSG00000006235(Epor),ENSMUSG00000008855(Hdac5),ENSMUSG00000010051(Hyal1),ENSMUSG00000015846(Rxra),ENSMUSG00000016933(Plcg1),ENSMUSG000…
BP	GO:0072358	cardiovascular system development	128	92	220	745	2.08194e-15	1.18398e-13	ENSMUSG00000000555(Itga5),ENSMUSG00000000628(Hk2),ENSMUSG00000000957(Mmp14),ENSMUSG00000001052(Sec24b),ENSMUSG00000001098(Kctd10),ENSMUSG00000001300(Efnb2),ENSMUSG00000001435(Col18a1),ENSMUSG00000001632(Brpf1),ENSMUSG00000002111(Spi1),ENSMUSG00000004040(Stat3),ENSMUSG00000004296(Il12b),ENSMUSG00000004936(Map2k1),ENSMUSG00000005413(Hmox1),ENSMUSG00000006705(Pknox1),ENSMUSG00000006818(Sod2),ENSMUSG…	ENSMUSG00000000440(Pparg),ENSMUSG00000001552(Jup),ENSMUSG00000001761(Smo),ENSMUSG00000002289(Angptl4),ENSMUSG00000004099(Dnmt1),ENSMUSG00000004105(Angptl2),ENSMUSG00000004565(Pnpla6),ENSMUSG00000004698(Hdac9),ENSMUSG00000005583(Mef2c),ENSMUSG00000005958(Ephb3),ENSMUSG00000006235(Epor),ENSMUSG00000008855(Hdac5),ENSMUSG00000010051(Hyal1),ENSMUSG00000015846(Rxra),ENSMUSG00000016933(Plcg1),ENSMUSG000…
BP	GO:0051270	regulation of cellular component movement	172	119	291	1061	2.6277e-15	1.48894e-13	ENSMUSG00000000532(Acvr1b),ENSMUSG00000000555(Itga5),ENSMUSG00000000957(Mmp14),ENSMUSG00000000982(Ccl3),ENSMUSG00000001123(Lgals9),ENSMUSG00000001435(Col18a1),ENSMUSG00000002233(Rhoc),ENSMUSG00000002413(Braf),ENSMUSG00000003665(Has1),ENSMUSG00000004040(Stat3),ENSMUSG00000004043(Stat5a),ENSMUSG00000004044(Cavin1),ENSMUSG00000004591(Pkn2),ENSMUSG00000004936(Map2k1),ENSMUSG00000005413(Hmox1),ENSMUSG…	ENSMUSG00000000149(Gna12),ENSMUSG00000000440(Pparg),ENSMUSG00000000869(Il4),ENSMUSG00000001227(Sema6b),ENSMUSG00000001552(Jup),ENSMUSG00000001761(Smo),ENSMUSG00000003518(Dusp3),ENSMUSG00000004462(Tbccd1),ENSMUSG00000004530(Coro1c),ENSMUSG00000004698(Hdac9),ENSMUSG00000005583(Mef2c),ENSMUSG00000006464(Bbs1),ENSMUSG00000008855(Hdac5),ENSMUSG00000010047(Hyal2),ENSMUSG00000010051(Hyal1),ENSMUSG000000…
BP	GO:0051094	positive regulation of developmental process	228	162	390	1518	2.70249e-15	1.52578e-13	ENSMUSG00000000409(Lck),ENSMUSG00000000532(Acvr1b),ENSMUSG00000000555(Itga5),ENSMUSG00000000628(Hk2),ENSMUSG00000000957(Mmp14),ENSMUSG00000000982(Ccl3),ENSMUSG00000001123(Lgals9),ENSMUSG00000001300(Efnb2),ENSMUSG00000001707(Eef1e1),ENSMUSG00000001785(Pwp1),ENSMUSG00000002413(Braf),ENSMUSG00000002602(Axl),ENSMUSG00000003948(Mmd),ENSMUSG00000004040(Stat3),ENSMUSG00000004043(Stat5a),ENSMUSG000000042…	ENSMUSG00000000440(Pparg),ENSMUSG00000000869(Il4),ENSMUSG00000001552(Jup),ENSMUSG00000001761(Smo),ENSMUSG00000002068(Ccne1),ENSMUSG00000002274(Metrn),ENSMUSG00000003282(Plag1),ENSMUSG00000003575(Crtc1),ENSMUSG00000003882(Il7r),ENSMUSG00000004530(Coro1c),ENSMUSG00000004698(Hdac9),ENSMUSG00000005514(Por),ENSMUSG00000005583(Mef2c),ENSMUSG00000005893(Nr2c2),ENSMUSG00000005958(Ephb3),ENSMUSG0000000623…
BP	GO:0009719	response to endogenous stimulus	234	186	420	1660	2.82417e-15	1.58875e-13	ENSMUSG00000000957(Mmp14),ENSMUSG00000001175(Calm1),ENSMUSG00000001288(Rarg),ENSMUSG00000001663(Gstt1),ENSMUSG00000002307(Daxx),ENSMUSG00000002413(Braf),ENSMUSG00000003206(Ebi3),ENSMUSG00000003665(Has1),ENSMUSG00000003849(Nqo1),ENSMUSG00000004040(Stat3),ENSMUSG00000004043(Stat5a),ENSMUSG00000004446(Bid),ENSMUSG00000004936(Map2k1),ENSMUSG00000005057(Sh2b2),ENSMUSG00000005087(Cd44),ENSMUSG000000062…	ENSMUSG00000000440(Pparg),ENSMUSG00000000869(Il4),ENSMUSG00000001552(Jup),ENSMUSG00000003518(Dusp3),ENSMUSG00000004099(Dnmt1),ENSMUSG00000004698(Hdac9),ENSMUSG00000005514(Por),ENSMUSG00000005583(Mef2c),ENSMUSG00000005718(Tfap4),ENSMUSG00000006611(Hfe),ENSMUSG00000006800(Sulf2),ENSMUSG00000010047(Hyal2),ENSMUSG00000010051(Hyal1),ENSMUSG00000010663(Fads1),ENSMUSG00000014158(Trpv4),ENSMUSG0000001584…
BP	GO:0010556	regulation of macromolecule biosynthetic process	457	409	866	3872	3.07527e-15	1.72381e-13	ENSMUSG00000000078(Klf6),ENSMUSG00000000275(Trim25),ENSMUSG00000000317(Bcl6b),ENSMUSG00000000441(Raf1),ENSMUSG00000000532(Acvr1b),ENSMUSG00000000730(Dnmt3l),ENSMUSG00000000838(Fmr1),ENSMUSG00000000982(Ccl3),ENSMUSG00000001288(Rarg),ENSMUSG00000001416(Cct3),ENSMUSG00000001542(Ell2),ENSMUSG00000001627(Ifrd1),ENSMUSG00000001632(Brpf1),ENSMUSG00000001785(Pwp1),ENSMUSG00000002111(Spi1),ENSMUSG00000002…	ENSMUSG00000000028(Cdc45),ENSMUSG00000000037(Scml2),ENSMUSG00000000282(Mnt),ENSMUSG00000000440(Pparg),ENSMUSG00000000693(Loxl3),ENSMUSG00000000869(Il4),ENSMUSG00000001228(Uhrf1),ENSMUSG00000001552(Jup),ENSMUSG00000001761(Smo),ENSMUSG00000002068(Ccne1),ENSMUSG00000002409(Dyrk1b),ENSMUSG00000002486(Tchp),ENSMUSG00000003282(Plag1),ENSMUSG00000003575(Crtc1),ENSMUSG00000003992(Ssbp2),ENSMUSG0000000409…
MF	GO:0032559	adenyl ribonucleotide binding	198	198	396	1545	3.26705e-15	1.82476e-13	ENSMUSG00000000409(Lck),ENSMUSG00000000441(Raf1),ENSMUSG00000000532(Acvr1b),ENSMUSG00000000628(Hk2),ENSMUSG00000001416(Cct3),ENSMUSG00000001630(Stk38l),ENSMUSG00000002227(Mov10),ENSMUSG00000002413(Braf),ENSMUSG00000002602(Axl),ENSMUSG00000002997(Prkar2b),ENSMUSG00000003283(Hck),ENSMUSG00000004591(Pkn2),ENSMUSG00000004936(Map2k1),ENSMUSG00000006740(Kif5b),ENSMUSG00000009376(Met),ENSMUSG00000012519…	ENSMUSG00000000631(Myo18a),ENSMUSG00000001755(Coasy),ENSMUSG00000002409(Dyrk1b),ENSMUSG00000002870(Mcm2),ENSMUSG00000003809(Gcdh),ENSMUSG00000004187(Kifc2),ENSMUSG00000004347(Pde1c),ENSMUSG00000004798(Ulk2),ENSMUSG00000004933(Matk),ENSMUSG00000005102(Eif2ak4),ENSMUSG00000005370(Msh6),ENSMUSG00000005580(Adcy9),ENSMUSG00000005907(Pex1),ENSMUSG00000005951(Shpk),ENSMUSG00000005958(Ephb3),ENSMUSG00000…
BP	GO:0002703	regulation of leukocyte mediated immunity	62	25	87	213	3.41964e-15	1.90319e-13	ENSMUSG00000001123(Lgals9),ENSMUSG00000004043(Stat5a),ENSMUSG00000004266(Ptpn6),ENSMUSG00000004296(Il12b),ENSMUSG00000005413(Hmox1),ENSMUSG00000015316(Slamf1),ENSMUSG00000017631(Abr),ENSMUSG00000017652(Cd40),ENSMUSG00000017776(Crk),ENSMUSG00000018500(Adora2b),ENSMUSG00000020075(Ddx21),ENSMUSG00000020641(Rsad2),ENSMUSG00000021457(Syk),ENSMUSG00000024164(C3),ENSMUSG00000024339(Tap2),ENSMUSG00000024…	ENSMUSG00000000869(Il4),ENSMUSG00000003882(Il7r),ENSMUSG00000006611(Hfe),ENSMUSG00000017550(Atad5),ENSMUSG00000018752(Tnfsfm13),ENSMUSG00000020101(Vsir),ENSMUSG00000020399(Havcr2),ENSMUSG00000024151(Msh2),ENSMUSG00000025880(Smad7),ENSMUSG00000026012(Cd28),ENSMUSG00000026471(Mr1),ENSMUSG00000029468(P2rx7),ENSMUSG00000030051(Aplf),ENSMUSG00000031101(Sash3),ENSMUSG00000032498(Mlh1),ENSMUSG0000003465…
BP	GO:0050794	regulation of cellular process	1245	1088	2333	11837	3.46782e-15	1.92317e-13	ENSMUSG00000000078(Klf6),ENSMUSG00000000184(Ccnd2),ENSMUSG00000000275(Trim25),ENSMUSG00000000317(Bcl6b),ENSMUSG00000000409(Lck),ENSMUSG00000000441(Raf1),ENSMUSG00000000532(Acvr1b),ENSMUSG00000000555(Itga5),ENSMUSG00000000628(Hk2),ENSMUSG00000000730(Dnmt3l),ENSMUSG00000000732(Icosl),ENSMUSG00000000838(Fmr1),ENSMUSG00000000915(Hip1r),ENSMUSG00000000957(Mmp14),ENSMUSG00000000982(Ccl3),ENSMUSG0000000…	ENSMUSG00000000028(Cdc45),ENSMUSG00000000037(Scml2),ENSMUSG00000000149(Gna12),ENSMUSG00000000282(Mnt),ENSMUSG00000000326(Comt),ENSMUSG00000000440(Pparg),ENSMUSG00000000631(Myo18a),ENSMUSG00000000693(Loxl3),ENSMUSG00000000751(Rpa1),ENSMUSG00000000869(Il4),ENSMUSG00000000881(Dlg3),ENSMUSG00000001227(Sema6b),ENSMUSG00000001228(Uhrf1),ENSMUSG00000001482(Def8),ENSMUSG00000001552(Jup),ENSMUSG0000000174…
BP	GO:0045785	positive regulation of cell adhesion	93	48	141	418	3.55422e-15	1.96412e-13	ENSMUSG00000000409(Lck),ENSMUSG00000000555(Itga5),ENSMUSG00000000732(Icosl),ENSMUSG00000001123(Lgals9),ENSMUSG00000001300(Efnb2),ENSMUSG00000002413(Braf),ENSMUSG00000004043(Stat5a),ENSMUSG00000004266(Ptpn6),ENSMUSG00000004296(Il12b),ENSMUSG00000004709(Cd244a),ENSMUSG00000005087(Cd44),ENSMUSG00000007655(Cav1),ENSMUSG00000014599(Csf1),ENSMUSG00000015316(Slamf1),ENSMUSG00000015396(Cd83),ENSMUSG00000…	ENSMUSG00000000869(Il4),ENSMUSG00000001552(Jup),ENSMUSG00000003882(Il7r),ENSMUSG00000010051(Hyal1),ENSMUSG00000017697(Ada),ENSMUSG00000020101(Vsir),ENSMUSG00000020399(Havcr2),ENSMUSG00000020689(Itgb3),ENSMUSG00000021756(Il6st),ENSMUSG00000022367(Has2),ENSMUSG00000025880(Smad7),ENSMUSG00000026012(Cd28),ENSMUSG00000026585(Kifap3),ENSMUSG00000026842(Abl1),ENSMUSG00000027111(Itga6),ENSMUSG00000027239…
CC	GO:0005815	microtubule organizing center	79	151	230	793	3.70869e-15	2.04226e-13	ENSMUSG00000000409(Lck),ENSMUSG00000000628(Hk2),ENSMUSG00000001175(Calm1),ENSMUSG00000002812(Flii),ENSMUSG00000002983(Relb),ENSMUSG00000002997(Prkar2b),ENSMUSG00000004591(Pkn2),ENSMUSG00000004936(Map2k1),ENSMUSG00000005732(Ranbp1),ENSMUSG00000006740(Kif5b),ENSMUSG00000015839(Nfe2l2),ENSMUSG00000016528(Mapkapk2),ENSMUSG00000018707(Dync1h1),ENSMUSG00000018736(Ndel1),ENSMUSG00000019794(Katna1),ENSMU…	ENSMUSG00000000028(Cdc45),ENSMUSG00000002031(Ift46),ENSMUSG00000002055(Spag5),ENSMUSG00000002068(Ccne1),ENSMUSG00000002104(Rapsn),ENSMUSG00000002486(Tchp),ENSMUSG00000003282(Plag1),ENSMUSG00000003452(Bicd1),ENSMUSG00000004462(Tbccd1),ENSMUSG00000004768(Rab23),ENSMUSG00000005699(Pard6a),ENSMUSG00000006464(Bbs1),ENSMUSG00000012609(Ttll5),ENSMUSG00000012819(Cdh23),ENSMUSG00000015971(Actr8),ENSMUSG00…
BP	GO:0065007	biological regulation	1357	1190	2547	13067	3.7269e-15	2.04509e-13	ENSMUSG00000000078(Klf6),ENSMUSG00000000184(Ccnd2),ENSMUSG00000000275(Trim25),ENSMUSG00000000317(Bcl6b),ENSMUSG00000000385(Tmprss2),ENSMUSG00000000409(Lck),ENSMUSG00000000441(Raf1),ENSMUSG00000000532(Acvr1b),ENSMUSG00000000555(Itga5),ENSMUSG00000000628(Hk2),ENSMUSG00000000682(Cd52),ENSMUSG00000000730(Dnmt3l),ENSMUSG00000000732(Icosl),ENSMUSG00000000776(Polr3d),ENSMUSG00000000838(Fmr1),ENSMUSG0000…	ENSMUSG00000000028(Cdc45),ENSMUSG00000000037(Scml2),ENSMUSG00000000149(Gna12),ENSMUSG00000000282(Mnt),ENSMUSG00000000326(Comt),ENSMUSG00000000440(Pparg),ENSMUSG00000000631(Myo18a),ENSMUSG00000000693(Loxl3),ENSMUSG00000000751(Rpa1),ENSMUSG00000000869(Il4),ENSMUSG00000000881(Dlg3),ENSMUSG00000001227(Sema6b),ENSMUSG00000001228(Uhrf1),ENSMUSG00000001482(Def8),ENSMUSG00000001552(Jup),ENSMUSG0000000174…
BP	GO:0001568	blood vessel development	124	88	212	715	4.31896e-15	2.36168e-13	ENSMUSG00000000555(Itga5),ENSMUSG00000000628(Hk2),ENSMUSG00000000957(Mmp14),ENSMUSG00000001052(Sec24b),ENSMUSG00000001098(Kctd10),ENSMUSG00000001300(Efnb2),ENSMUSG00000001435(Col18a1),ENSMUSG00000001632(Brpf1),ENSMUSG00000002111(Spi1),ENSMUSG00000004040(Stat3),ENSMUSG00000004296(Il12b),ENSMUSG00000004936(Map2k1),ENSMUSG00000005413(Hmox1),ENSMUSG00000006705(Pknox1),ENSMUSG00000007655(Cav1),ENSMUSG…	ENSMUSG00000000440(Pparg),ENSMUSG00000001552(Jup),ENSMUSG00000001761(Smo),ENSMUSG00000002289(Angptl4),ENSMUSG00000004105(Angptl2),ENSMUSG00000004565(Pnpla6),ENSMUSG00000004698(Hdac9),ENSMUSG00000005583(Mef2c),ENSMUSG00000005958(Ephb3),ENSMUSG00000006235(Epor),ENSMUSG00000008855(Hdac5),ENSMUSG00000010051(Hyal1),ENSMUSG00000015846(Rxra),ENSMUSG00000016933(Plcg1),ENSMUSG00000017146(Brca1),ENSMUSG000…
BP	GO:0019219	regulation of nucleobase-containing compound metabolic process	457	415	872	3908	4.41305e-15	2.40473e-13	ENSMUSG00000000078(Klf6),ENSMUSG00000000275(Trim25),ENSMUSG00000000317(Bcl6b),ENSMUSG00000000441(Raf1),ENSMUSG00000000532(Acvr1b),ENSMUSG00000000730(Dnmt3l),ENSMUSG00000000982(Ccl3),ENSMUSG00000001288(Rarg),ENSMUSG00000001416(Cct3),ENSMUSG00000001542(Ell2),ENSMUSG00000001627(Ifrd1),ENSMUSG00000001632(Brpf1),ENSMUSG00000001785(Pwp1),ENSMUSG00000002111(Spi1),ENSMUSG00000002227(Mov10),ENSMUSG0000000…	ENSMUSG00000000028(Cdc45),ENSMUSG00000000037(Scml2),ENSMUSG00000000282(Mnt),ENSMUSG00000000440(Pparg),ENSMUSG00000000693(Loxl3),ENSMUSG00000000869(Il4),ENSMUSG00000001228(Uhrf1),ENSMUSG00000001552(Jup),ENSMUSG00000001761(Smo),ENSMUSG00000002068(Ccne1),ENSMUSG00000002107(Celf2),ENSMUSG00000002409(Dyrk1b),ENSMUSG00000002486(Tchp),ENSMUSG00000003282(Plag1),ENSMUSG00000003575(Crtc1),ENSMUSG0000000399…
BP	GO:0090304	nucleic acid metabolic process	560	511	1071	4942	5.47035e-15	2.97051e-13	ENSMUSG00000000078(Klf6),ENSMUSG00000000275(Trim25),ENSMUSG00000000317(Bcl6b),ENSMUSG00000000441(Raf1),ENSMUSG00000000532(Acvr1b),ENSMUSG00000000730(Dnmt3l),ENSMUSG00000000732(Icosl),ENSMUSG00000000776(Polr3d),ENSMUSG00000000838(Fmr1),ENSMUSG00000000982(Ccl3),ENSMUSG00000001056(Nhp2),ENSMUSG00000001288(Rarg),ENSMUSG00000001305(Rrp15),ENSMUSG00000001416(Cct3),ENSMUSG00000001542(Ell2),ENSMUSG000000…	ENSMUSG00000000028(Cdc45),ENSMUSG00000000037(Scml2),ENSMUSG00000000282(Mnt),ENSMUSG00000000440(Pparg),ENSMUSG00000000693(Loxl3),ENSMUSG00000000751(Rpa1),ENSMUSG00000000869(Il4),ENSMUSG00000001228(Uhrf1),ENSMUSG00000001552(Jup),ENSMUSG00000001761(Smo),ENSMUSG00000002068(Ccne1),ENSMUSG00000002107(Celf2),ENSMUSG00000002109(Ddb2),ENSMUSG00000002409(Dyrk1b),ENSMUSG00000002486(Tchp),ENSMUSG00000002731(…
BP	GO:0071396	cellular response to lipid	127	57	184	597	5.51377e-15	2.98373e-13	ENSMUSG00000000982(Ccl3),ENSMUSG00000001248(Gramd1a),ENSMUSG00000001288(Rarg),ENSMUSG00000002307(Daxx),ENSMUSG00000002602(Axl),ENSMUSG00000004296(Il12b),ENSMUSG00000005732(Ranbp1),ENSMUSG00000016496(Cd274),ENSMUSG00000016529(Il10),ENSMUSG00000017652(Cd40),ENSMUSG00000018920(Cxcl16),ENSMUSG00000019782(Rwdd1),ENSMUSG00000019850(Tnfaip3),ENSMUSG00000019982(Myb),ENSMUSG00000020038(Cry1),ENSMUSG000000…	ENSMUSG00000000440(Pparg),ENSMUSG00000001761(Smo),ENSMUSG00000005583(Mef2c),ENSMUSG00000005718(Tfap4),ENSMUSG00000005951(Shpk),ENSMUSG00000008855(Hdac5),ENSMUSG00000015846(Rxra),ENSMUSG00000017146(Brca1),ENSMUSG00000019768(Esr1),ENSMUSG00000020399(Havcr2),ENSMUSG00000020654(Adcy3),ENSMUSG00000020889(Nr1d1),ENSMUSG00000021127(Zfp36l1),ENSMUSG00000021699(Pde4d),ENSMUSG00000022150(Dab2),ENSMUSG00000…
MF	GO:0030554	adenyl nucleotide binding	198	199	397	1558	7.87219e-15	4.24528e-13	ENSMUSG00000000409(Lck),ENSMUSG00000000441(Raf1),ENSMUSG00000000532(Acvr1b),ENSMUSG00000000628(Hk2),ENSMUSG00000001416(Cct3),ENSMUSG00000001630(Stk38l),ENSMUSG00000002227(Mov10),ENSMUSG00000002413(Braf),ENSMUSG00000002602(Axl),ENSMUSG00000002997(Prkar2b),ENSMUSG00000003283(Hck),ENSMUSG00000004591(Pkn2),ENSMUSG00000004936(Map2k1),ENSMUSG00000006740(Kif5b),ENSMUSG00000009376(Met),ENSMUSG00000012519…	ENSMUSG00000000631(Myo18a),ENSMUSG00000001755(Coasy),ENSMUSG00000002409(Dyrk1b),ENSMUSG00000002870(Mcm2),ENSMUSG00000003809(Gcdh),ENSMUSG00000004187(Kifc2),ENSMUSG00000004347(Pde1c),ENSMUSG00000004798(Ulk2),ENSMUSG00000004933(Matk),ENSMUSG00000005102(Eif2ak4),ENSMUSG00000005370(Msh6),ENSMUSG00000005580(Adcy9),ENSMUSG00000005907(Pex1),ENSMUSG00000005951(Shpk),ENSMUSG00000005958(Ephb3),ENSMUSG00000…
BP	GO:0031331	positive regulation of cellular catabolic process	75	57	132	386	8.27543e-15	4.4338e-13	ENSMUSG00000000628(Hk2),ENSMUSG00000002227(Mov10),ENSMUSG00000004221(Ikbkg),ENSMUSG00000004446(Bid),ENSMUSG00000004936(Map2k1),ENSMUSG00000005413(Hmox1),ENSMUSG00000007655(Cav1),ENSMUSG00000011305(Plin5),ENSMUSG00000019471(Cdc37),ENSMUSG00000019850(Tnfaip3),ENSMUSG00000020115(Tbk1),ENSMUSG00000020423(Btg2),ENSMUSG00000020464(Pnpt1),ENSMUSG00000020642(Rnf144a),ENSMUSG00000021109(Hif1a),ENSMUSG0000…	ENSMUSG00000000869(Il4),ENSMUSG00000004798(Ulk2),ENSMUSG00000005102(Eif2ak4),ENSMUSG00000006362(Cbfa2t3),ENSMUSG00000021127(Zfp36l1),ENSMUSG00000021236(Entpd5),ENSMUSG00000021482(Prxl2c),ENSMUSG00000022051(Bnip3l),ENSMUSG00000022150(Dab2),ENSMUSG00000022433(Csnk1e),ENSMUSG00000022708(Zbtb20),ENSMUSG00000023019(Gpd1),ENSMUSG00000023826(Prkn),ENSMUSG00000023990(Tfeb),ENSMUSG00000024349(Sting1),ENSM…
BP	GO:0009894	regulation of catabolic process	143	103	246	868	8.27846e-15	4.4338e-13	ENSMUSG00000000628(Hk2),ENSMUSG00000001467(Cyp51),ENSMUSG00000002227(Mov10),ENSMUSG00000002845(Tmem39a),ENSMUSG00000004040(Stat3),ENSMUSG00000004221(Ikbkg),ENSMUSG00000004446(Bid),ENSMUSG00000004936(Map2k1),ENSMUSG00000005413(Hmox1),ENSMUSG00000005610(Eif4g2),ENSMUSG00000007655(Cav1),ENSMUSG00000011305(Plin5),ENSMUSG00000013415(Igf2bp1),ENSMUSG00000014956(Ppp1cb),ENSMUSG00000016528(Mapkapk2),ENSM…	ENSMUSG00000000149(Gna12),ENSMUSG00000000869(Il4),ENSMUSG00000004798(Ulk2),ENSMUSG00000005102(Eif2ak4),ENSMUSG00000006362(Cbfa2t3),ENSMUSG00000006611(Hfe),ENSMUSG00000013622(Atraid),ENSMUSG00000018669(Cdk5rap3),ENSMUSG00000019302(Atp6v0a1),ENSMUSG00000020101(Vsir),ENSMUSG00000020883(Fbxl20),ENSMUSG00000021127(Zfp36l1),ENSMUSG00000021236(Entpd5),ENSMUSG00000021482(Prxl2c),ENSMUSG00000021838(Samd4)…
BP	GO:0031329	regulation of cellular catabolic process	121	92	213	724	9.10029e-15	4.85732e-13	ENSMUSG00000000628(Hk2),ENSMUSG00000002227(Mov10),ENSMUSG00000002845(Tmem39a),ENSMUSG00000004040(Stat3),ENSMUSG00000004221(Ikbkg),ENSMUSG00000004446(Bid),ENSMUSG00000004936(Map2k1),ENSMUSG00000005413(Hmox1),ENSMUSG00000005610(Eif4g2),ENSMUSG00000007655(Cav1),ENSMUSG00000011305(Plin5),ENSMUSG00000013415(Igf2bp1),ENSMUSG00000014956(Ppp1cb),ENSMUSG00000016528(Mapkapk2),ENSMUSG00000016529(Il10),ENSMU…	ENSMUSG00000000149(Gna12),ENSMUSG00000000869(Il4),ENSMUSG00000004798(Ulk2),ENSMUSG00000005102(Eif2ak4),ENSMUSG00000006362(Cbfa2t3),ENSMUSG00000006611(Hfe),ENSMUSG00000013622(Atraid),ENSMUSG00000018669(Cdk5rap3),ENSMUSG00000019302(Atp6v0a1),ENSMUSG00000021127(Zfp36l1),ENSMUSG00000021236(Entpd5),ENSMUSG00000021482(Prxl2c),ENSMUSG00000021838(Samd4),ENSMUSG00000022051(Bnip3l),ENSMUSG00000022150(Dab2)…
BP	GO:0001525	angiogenesis	99	67	166	525	1.00914e-14	5.36803e-13	ENSMUSG00000000555(Itga5),ENSMUSG00000000628(Hk2),ENSMUSG00000000957(Mmp14),ENSMUSG00000001098(Kctd10),ENSMUSG00000001300(Efnb2),ENSMUSG00000001435(Col18a1),ENSMUSG00000004040(Stat3),ENSMUSG00000004296(Il12b),ENSMUSG00000005413(Hmox1),ENSMUSG00000006705(Pknox1),ENSMUSG00000007655(Cav1),ENSMUSG00000013076(Amotl1),ENSMUSG00000014773(Dll1),ENSMUSG00000015340(Cybb),ENSMUSG00000015605(Srf),ENSMUSG0000…	ENSMUSG00000000440(Pparg),ENSMUSG00000001552(Jup),ENSMUSG00000002289(Angptl4),ENSMUSG00000004105(Angptl2),ENSMUSG00000004565(Pnpla6),ENSMUSG00000004698(Hdac9),ENSMUSG00000005958(Ephb3),ENSMUSG00000008855(Hdac5),ENSMUSG00000010051(Hyal1),ENSMUSG00000015846(Rxra),ENSMUSG00000016933(Plcg1),ENSMUSG00000017146(Brca1),ENSMUSG00000017417(Plxdc1),ENSMUSG00000018983(E2f2),ENSMUSG00000020689(Itgb3),ENSMUSG…
BP	GO:2000112	regulation of cellular macromolecule biosynthetic process	451	405	856	3839	1.06947e-14	5.66966e-13	ENSMUSG00000000078(Klf6),ENSMUSG00000000275(Trim25),ENSMUSG00000000317(Bcl6b),ENSMUSG00000000441(Raf1),ENSMUSG00000000532(Acvr1b),ENSMUSG00000000730(Dnmt3l),ENSMUSG00000000838(Fmr1),ENSMUSG00000000982(Ccl3),ENSMUSG00000001288(Rarg),ENSMUSG00000001416(Cct3),ENSMUSG00000001542(Ell2),ENSMUSG00000001627(Ifrd1),ENSMUSG00000001632(Brpf1),ENSMUSG00000001785(Pwp1),ENSMUSG00000002111(Spi1),ENSMUSG00000002…	ENSMUSG00000000028(Cdc45),ENSMUSG00000000037(Scml2),ENSMUSG00000000282(Mnt),ENSMUSG00000000440(Pparg),ENSMUSG00000000693(Loxl3),ENSMUSG00000000869(Il4),ENSMUSG00000001228(Uhrf1),ENSMUSG00000001552(Jup),ENSMUSG00000001761(Smo),ENSMUSG00000002068(Ccne1),ENSMUSG00000002409(Dyrk1b),ENSMUSG00000002486(Tchp),ENSMUSG00000003282(Plag1),ENSMUSG00000003575(Crtc1),ENSMUSG00000003992(Ssbp2),ENSMUSG0000000409…
BP	GO:1903039	positive regulation of leukocyte cell-cell adhesion	59	27	86	213	1.09955e-14	5.80941e-13	ENSMUSG00000000409(Lck),ENSMUSG00000000732(Icosl),ENSMUSG00000001123(Lgals9),ENSMUSG00000001300(Efnb2),ENSMUSG00000004043(Stat5a),ENSMUSG00000004296(Il12b),ENSMUSG00000004709(Cd244a),ENSMUSG00000005087(Cd44),ENSMUSG00000007655(Cav1),ENSMUSG00000015316(Slamf1),ENSMUSG00000015396(Cd83),ENSMUSG00000016496(Cd274),ENSMUSG00000018899(Irf1),ENSMUSG00000019982(Myb),ENSMUSG00000021270(Hsp90aa1),ENSMUSG000…	ENSMUSG00000000869(Il4),ENSMUSG00000003882(Il7r),ENSMUSG00000017697(Ada),ENSMUSG00000020101(Vsir),ENSMUSG00000020399(Havcr2),ENSMUSG00000021756(Il6st),ENSMUSG00000022367(Has2),ENSMUSG00000026012(Cd28),ENSMUSG00000027239(Mdk),ENSMUSG00000027843(Ptpn22),ENSMUSG00000029204(Rhoh),ENSMUSG00000029869(Ephb6),ENSMUSG00000030528(Blm),ENSMUSG00000031101(Sash3),ENSMUSG00000031217(Efnb1),ENSMUSG00000031497(T…
BP	GO:0030030	cell projection organization	183	214	397	1566	1.32273e-14	6.96504e-13	ENSMUSG00000001052(Sec24b),ENSMUSG00000001300(Efnb2),ENSMUSG00000001627(Ifrd1),ENSMUSG00000002227(Mov10),ENSMUSG00000002413(Braf),ENSMUSG00000003070(Efna2),ENSMUSG00000004591(Pkn2),ENSMUSG00000004936(Map2k1),ENSMUSG00000005087(Cd44),ENSMUSG00000005610(Eif4g2),ENSMUSG00000005732(Ranbp1),ENSMUSG00000006740(Kif5b),ENSMUSG00000007655(Cav1),ENSMUSG00000008892(Vdac3),ENSMUSG00000015605(Srf),ENSMUSG0000…	ENSMUSG00000001227(Sema6b),ENSMUSG00000001482(Def8),ENSMUSG00000001761(Smo),ENSMUSG00000002031(Ift46),ENSMUSG00000002274(Metrn),ENSMUSG00000002486(Tchp),ENSMUSG00000003575(Crtc1),ENSMUSG00000004151(Etv1),ENSMUSG00000004530(Coro1c),ENSMUSG00000004768(Rab23),ENSMUSG00000004798(Ulk2),ENSMUSG00000005102(Eif2ak4),ENSMUSG00000005583(Mef2c),ENSMUSG00000005958(Ephb3),ENSMUSG00000006235(Epor),ENSMUSG00000…
BP	GO:0034121	regulation of toll-like receptor signaling pathway	28	12	40	66	1.36084e-14	7.14168e-13	ENSMUSG00000007655(Cav1),ENSMUSG00000010358(Ifi35),ENSMUSG00000018899(Irf1),ENSMUSG00000019850(Tnfaip3),ENSMUSG00000020134(Peli1),ENSMUSG00000020227(Irak3),ENSMUSG00000020641(Rsad2),ENSMUSG00000022892(App),ENSMUSG00000025017(Pik3ap1),ENSMUSG00000025058(Tasl),ENSMUSG00000025498(Irf7),ENSMUSG00000026883(Dab2ip),ENSMUSG00000027995(Tlr2),ENSMUSG00000028885(Smpdl3b),ENSMUSG00000029275(Gfi1),ENSMUSG000…	ENSMUSG00000019768(Esr1),ENSMUSG00000020263(Appl2),ENSMUSG00000020889(Nr1d1),ENSMUSG00000021356(Irf4),ENSMUSG00000027843(Ptpn22),ENSMUSG00000034652(Cd300a),ENSMUSG00000035900(Gramd4),ENSMUSG00000047798(Cd300lf),ENSMUSG00000050132(Sarm1),ENSMUSG00000052688(Rab7b),ENSMUSG00000070056(Mfhas1),ENSMUSG00000073643(Wdfy1)
BP	GO:0044087	regulation of cellular component biogenesis	148	121	269	975	1.4956e-14	7.82265e-13	ENSMUSG00000000441(Raf1),ENSMUSG00000000915(Hip1r),ENSMUSG00000000957(Mmp14),ENSMUSG00000002233(Rhoc),ENSMUSG00000002413(Braf),ENSMUSG00000002812(Flii),ENSMUSG00000002845(Tmem39a),ENSMUSG00000003283(Hck),ENSMUSG00000004446(Bid),ENSMUSG00000007655(Cav1),ENSMUSG00000008892(Vdac3),ENSMUSG00000009376(Met),ENSMUSG00000015605(Srf),ENSMUSG00000015733(Capza2),ENSMUSG00000015957(Wnt11),ENSMUSG00000016559(…	ENSMUSG00000001482(Def8),ENSMUSG00000002031(Ift46),ENSMUSG00000002055(Spag5),ENSMUSG00000002083(Bbc3),ENSMUSG00000002486(Tchp),ENSMUSG00000003518(Dusp3),ENSMUSG00000004099(Dnmt1),ENSMUSG00000004530(Coro1c),ENSMUSG00000005583(Mef2c),ENSMUSG00000005682(Pan2),ENSMUSG00000005958(Ephb3),ENSMUSG00000006219(Fblim1),ENSMUSG00000010051(Hyal1),ENSMUSG00000014778(Fhod1),ENSMUSG00000015711(Prune1),ENSMUSG000…
CC	GO:0005856	cytoskeleton	240	301	541	2265	1.64136e-14	8.55642e-13	ENSMUSG00000000409(Lck),ENSMUSG00000000628(Hk2),ENSMUSG00000000915(Hip1r),ENSMUSG00000000957(Mmp14),ENSMUSG00000001175(Calm1),ENSMUSG00000001416(Cct3),ENSMUSG00000001473(Tubb6),ENSMUSG00000001630(Stk38l),ENSMUSG00000002233(Rhoc),ENSMUSG00000002602(Axl),ENSMUSG00000002812(Flii),ENSMUSG00000002983(Relb),ENSMUSG00000002997(Prkar2b),ENSMUSG00000003283(Hck),ENSMUSG00000004221(Ikbkg),ENSMUSG00000004591…	ENSMUSG00000000028(Cdc45),ENSMUSG00000000056(Narf),ENSMUSG00000000631(Myo18a),ENSMUSG00000001552(Jup),ENSMUSG00000002031(Ift46),ENSMUSG00000002055(Spag5),ENSMUSG00000002068(Ccne1),ENSMUSG00000002104(Rapsn),ENSMUSG00000002257(Def6),ENSMUSG00000002486(Tchp),ENSMUSG00000002870(Mcm2),ENSMUSG00000003282(Plag1),ENSMUSG00000003452(Bicd1),ENSMUSG00000003546(Klc4),ENSMUSG00000004187(Kifc2),ENSMUSG00000004…
BP	GO:0031328	positive regulation of cellular biosynthetic process	267	211	478	1957	1.82324e-14	9.47295e-13	ENSMUSG00000000078(Klf6),ENSMUSG00000000275(Trim25),ENSMUSG00000000441(Raf1),ENSMUSG00000000532(Acvr1b),ENSMUSG00000000982(Ccl3),ENSMUSG00000001288(Rarg),ENSMUSG00000001416(Cct3),ENSMUSG00000001542(Ell2),ENSMUSG00000001627(Ifrd1),ENSMUSG00000001632(Brpf1),ENSMUSG00000001785(Pwp1),ENSMUSG00000002111(Spi1),ENSMUSG00000002307(Daxx),ENSMUSG00000002658(Gtf2f1),ENSMUSG00000002983(Relb),ENSMUSG000000040…	ENSMUSG00000000440(Pparg),ENSMUSG00000000869(Il4),ENSMUSG00000001552(Jup),ENSMUSG00000001761(Smo),ENSMUSG00000002409(Dyrk1b),ENSMUSG00000003282(Plag1),ENSMUSG00000003575(Crtc1),ENSMUSG00000003992(Ssbp2),ENSMUSG00000004151(Etv1),ENSMUSG00000005102(Eif2ak4),ENSMUSG00000005514(Por),ENSMUSG00000005583(Mef2c),ENSMUSG00000005718(Tfap4),ENSMUSG00000005893(Nr2c2),ENSMUSG00000006288(Ttc5),ENSMUSG000000088…
BP	GO:0007265	Ras protein signal transduction	70	44	114	319	1.83345e-14	9.49449e-13	ENSMUSG00000001098(Kctd10),ENSMUSG00000001440(Kpnb1),ENSMUSG00000004936(Map2k1),ENSMUSG00000004952(Rasa4),ENSMUSG00000005057(Sh2b2),ENSMUSG00000009376(Met),ENSMUSG00000009630(Ppp2cb),ENSMUSG00000014599(Csf1),ENSMUSG00000017776(Crk),ENSMUSG00000018334(Ksr1),ENSMUSG00000020121(Srgap1),ENSMUSG00000020476(Dbnl),ENSMUSG00000020573(Pik3cg),ENSMUSG00000020580(Rock2),ENSMUSG00000021215(Net1),ENSMUSG00000…	ENSMUSG00000000149(Gna12),ENSMUSG00000004099(Dnmt1),ENSMUSG00000015766(Eps8),ENSMUSG00000017132(Cyth1),ENSMUSG00000017466(Timp2),ENSMUSG00000019478(Rab4a),ENSMUSG00000019852(Arfgef3),ENSMUSG00000019966(Kitl),ENSMUSG00000022105(Rb1),ENSMUSG00000022114(Spry2),ENSMUSG00000022469(Rapgef3),ENSMUSG00000022722(Arl6),ENSMUSG00000025372(Baiap2),ENSMUSG00000026271(Gpr35),ENSMUSG00000026842(Abl1),ENSMUSG000…
BP	GO:0035458	cellular response to interferon-beta	30	2	32	46	1.95563e-14	1.00861e-12	ENSMUSG00000018899(Irf1),ENSMUSG00000020464(Pnpt1),ENSMUSG00000026535(Ifi202b),ENSMUSG00000026536(Ifi211),ENSMUSG00000028268(Gbp3),ENSMUSG00000028270(Gbp2),ENSMUSG00000031639(Tlr3),ENSMUSG00000034459(Ifit1),ENSMUSG00000039997(Ifi203),ENSMUSG00000043263(Ifi209),ENSMUSG00000046879(Irgm1),ENSMUSG00000048806(Ifnb1),ENSMUSG00000054072(Iigp1),ENSMUSG00000054203(Ifi205),ENSMUSG00000058163(Gm5431),ENSMUS…	ENSMUSG00000024349(Sting1),ENSMUSG00000068329(Htra2)
BP	GO:0051172	negative regulation of nitrogen compound metabolic process	314	277	591	2511	1.96059e-14	1.00861e-12	ENSMUSG00000000317(Bcl6b),ENSMUSG00000000730(Dnmt3l),ENSMUSG00000000838(Fmr1),ENSMUSG00000000983(Wfdc18),ENSMUSG00000001288(Rarg),ENSMUSG00000001348(Acp5),ENSMUSG00000001467(Cyp51),ENSMUSG00000001785(Pwp1),ENSMUSG00000002111(Spi1),ENSMUSG00000002227(Mov10),ENSMUSG00000002307(Daxx),ENSMUSG00000002881(Nab1),ENSMUSG00000002983(Relb),ENSMUSG00000002997(Prkar2b),ENSMUSG00000004040(Stat3),ENSMUSG000000…	ENSMUSG00000000028(Cdc45),ENSMUSG00000000037(Scml2),ENSMUSG00000000282(Mnt),ENSMUSG00000000326(Comt),ENSMUSG00000000440(Pparg),ENSMUSG00000000693(Loxl3),ENSMUSG00000000869(Il4),ENSMUSG00000001228(Uhrf1),ENSMUSG00000001761(Smo),ENSMUSG00000002068(Ccne1),ENSMUSG00000003518(Dusp3),ENSMUSG00000004099(Dnmt1),ENSMUSG00000004530(Coro1c),ENSMUSG00000004698(Hdac9),ENSMUSG00000005102(Eif2ak4),ENSMUSG000000…
BP	GO:0044271	cellular nitrogen compound biosynthetic process	532	481	1013	4661	2.10231e-14	1.07797e-12	ENSMUSG00000000078(Klf6),ENSMUSG00000000275(Trim25),ENSMUSG00000000317(Bcl6b),ENSMUSG00000000441(Raf1),ENSMUSG00000000532(Acvr1b),ENSMUSG00000000730(Dnmt3l),ENSMUSG00000000776(Polr3d),ENSMUSG00000000838(Fmr1),ENSMUSG00000000982(Ccl3),ENSMUSG00000001056(Nhp2),ENSMUSG00000001288(Rarg),ENSMUSG00000001348(Acp5),ENSMUSG00000001416(Cct3),ENSMUSG00000001542(Ell2),ENSMUSG00000001627(Ifrd1),ENSMUSG0000000…	ENSMUSG00000000028(Cdc45),ENSMUSG00000000037(Scml2),ENSMUSG00000000282(Mnt),ENSMUSG00000000440(Pparg),ENSMUSG00000000693(Loxl3),ENSMUSG00000000751(Rpa1),ENSMUSG00000000869(Il4),ENSMUSG00000001228(Uhrf1),ENSMUSG00000001552(Jup),ENSMUSG00000001755(Coasy),ENSMUSG00000001761(Smo),ENSMUSG00000002068(Ccne1),ENSMUSG00000002409(Dyrk1b),ENSMUSG00000002486(Tchp),ENSMUSG00000003282(Plag1),ENSMUSG00000003575…
BP	GO:0051347	positive regulation of transferase activity	111	78	189	626	2.12246e-14	1.08474e-12	ENSMUSG00000000184(Ccnd2),ENSMUSG00000000441(Raf1),ENSMUSG00000001123(Lgals9),ENSMUSG00000002307(Daxx),ENSMUSG00000002413(Braf),ENSMUSG00000002602(Axl),ENSMUSG00000002699(Lcp2),ENSMUSG00000003948(Mmd),ENSMUSG00000004221(Ikbkg),ENSMUSG00000004296(Il12b),ENSMUSG00000004936(Map2k1),ENSMUSG00000006262(Mob1b),ENSMUSG00000012519(Mlkl),ENSMUSG00000014599(Csf1),ENSMUSG00000015312(Gadd45b),ENSMUSG00000015…	ENSMUSG00000000869(Il4),ENSMUSG00000000881(Dlg3),ENSMUSG00000005583(Mef2c),ENSMUSG00000005958(Ephb3),ENSMUSG00000014361(Mertk),ENSMUSG00000014426(Map3k4),ENSMUSG00000016984(Etaa1),ENSMUSG00000019966(Kitl),ENSMUSG00000020189(Osbpl8),ENSMUSG00000020312(Shc2),ENSMUSG00000020541(Tom1l1),ENSMUSG00000020623(Map2k6),ENSMUSG00000020689(Itgb3),ENSMUSG00000020888(Dvl2),ENSMUSG00000021253(Tgfb3),ENSMUSG0000…
MF	GO:0005524	ATP binding	190	188	378	1479	2.37472e-14	1.20971e-12	ENSMUSG00000000409(Lck),ENSMUSG00000000441(Raf1),ENSMUSG00000000532(Acvr1b),ENSMUSG00000000628(Hk2),ENSMUSG00000001416(Cct3),ENSMUSG00000001630(Stk38l),ENSMUSG00000002227(Mov10),ENSMUSG00000002413(Braf),ENSMUSG00000002602(Axl),ENSMUSG00000003283(Hck),ENSMUSG00000004591(Pkn2),ENSMUSG00000004936(Map2k1),ENSMUSG00000006740(Kif5b),ENSMUSG00000009376(Met),ENSMUSG00000012519(Mlkl),ENSMUSG00000014349(Ub…	ENSMUSG00000000631(Myo18a),ENSMUSG00000001755(Coasy),ENSMUSG00000002409(Dyrk1b),ENSMUSG00000002870(Mcm2),ENSMUSG00000004187(Kifc2),ENSMUSG00000004798(Ulk2),ENSMUSG00000004933(Matk),ENSMUSG00000005102(Eif2ak4),ENSMUSG00000005370(Msh6),ENSMUSG00000005580(Adcy9),ENSMUSG00000005907(Pex1),ENSMUSG00000005951(Shpk),ENSMUSG00000005958(Ephb3),ENSMUSG00000007035(Msh5),ENSMUSG00000010021(Kif19a),ENSMUSG0000…
BP	GO:0046631	alpha-beta T cell activation	45	23	68	153	2.61101e-14	1.32577e-12	ENSMUSG00000001123(Lgals9),ENSMUSG00000002413(Braf),ENSMUSG00000002983(Relb),ENSMUSG00000004040(Stat3),ENSMUSG00000004296(Il12b),ENSMUSG00000004709(Cd244a),ENSMUSG00000015396(Cd83),ENSMUSG00000016496(Cd274),ENSMUSG00000018899(Irf1),ENSMUSG00000019982(Myb),ENSMUSG00000020178(Adora2a),ENSMUSG00000020641(Rsad2),ENSMUSG00000021457(Syk),ENSMUSG00000025383(Il23a),ENSMUSG00000025746(Il6),ENSMUSG00000026…	ENSMUSG00000000693(Loxl3),ENSMUSG00000000869(Il4),ENSMUSG00000006611(Hfe),ENSMUSG00000017697(Ada),ENSMUSG00000020101(Vsir),ENSMUSG00000021356(Irf4),ENSMUSG00000023927(Satb1),ENSMUSG00000025880(Smad7),ENSMUSG00000026012(Cd28),ENSMUSG00000026842(Abl1),ENSMUSG00000027843(Ptpn22),ENSMUSG00000027947(Il6ra),ENSMUSG00000030528(Blm),ENSMUSG00000031101(Sash3),ENSMUSG00000032238(Rora),ENSMUSG00000032440(Tg…
BP	GO:0120036	plasma membrane bounded cell projection organization	179	208	387	1527	3.12379e-14	1.581e-12	ENSMUSG00000001052(Sec24b),ENSMUSG00000001300(Efnb2),ENSMUSG00000001627(Ifrd1),ENSMUSG00000002227(Mov10),ENSMUSG00000002413(Braf),ENSMUSG00000003070(Efna2),ENSMUSG00000004936(Map2k1),ENSMUSG00000005087(Cd44),ENSMUSG00000005610(Eif4g2),ENSMUSG00000005732(Ranbp1),ENSMUSG00000006740(Kif5b),ENSMUSG00000007655(Cav1),ENSMUSG00000008892(Vdac3),ENSMUSG00000015605(Srf),ENSMUSG00000015839(Nfe2l2),ENSMUSG00…	ENSMUSG00000001227(Sema6b),ENSMUSG00000001482(Def8),ENSMUSG00000001761(Smo),ENSMUSG00000002031(Ift46),ENSMUSG00000002274(Metrn),ENSMUSG00000002486(Tchp),ENSMUSG00000003575(Crtc1),ENSMUSG00000004151(Etv1),ENSMUSG00000004530(Coro1c),ENSMUSG00000004768(Rab23),ENSMUSG00000004798(Ulk2),ENSMUSG00000005102(Eif2ak4),ENSMUSG00000005583(Mef2c),ENSMUSG00000005958(Ephb3),ENSMUSG00000006235(Epor),ENSMUSG00000…
BP	GO:0072359	circulatory system development	164	137	301	1129	4.39342e-14	2.21641e-12	ENSMUSG00000000441(Raf1),ENSMUSG00000000555(Itga5),ENSMUSG00000000628(Hk2),ENSMUSG00000000957(Mmp14),ENSMUSG00000001052(Sec24b),ENSMUSG00000001098(Kctd10),ENSMUSG00000001300(Efnb2),ENSMUSG00000001435(Col18a1),ENSMUSG00000001632(Brpf1),ENSMUSG00000002111(Spi1),ENSMUSG00000004040(Stat3),ENSMUSG00000004296(Il12b),ENSMUSG00000004936(Map2k1),ENSMUSG00000005413(Hmox1),ENSMUSG00000005610(Eif4g2),ENSMUSG…	ENSMUSG00000000440(Pparg),ENSMUSG00000001552(Jup),ENSMUSG00000001761(Smo),ENSMUSG00000002289(Angptl4),ENSMUSG00000004099(Dnmt1),ENSMUSG00000004105(Angptl2),ENSMUSG00000004565(Pnpla6),ENSMUSG00000004698(Hdac9),ENSMUSG00000005583(Mef2c),ENSMUSG00000005958(Ephb3),ENSMUSG00000006235(Epor),ENSMUSG00000008855(Hdac5),ENSMUSG00000009090(Ap1b1),ENSMUSG00000010051(Hyal1),ENSMUSG00000015846(Rxra),ENSMUSG000…
BP	GO:0050729	positive regulation of inflammatory response	50	14	64	141	4.45479e-14	2.24014e-12	ENSMUSG00000000982(Ccl3),ENSMUSG00000002897(Il17ra),ENSMUSG00000004040(Stat3),ENSMUSG00000004043(Stat5a),ENSMUSG00000010358(Ifi35),ENSMUSG00000018500(Adora2b),ENSMUSG00000020122(Egfr),ENSMUSG00000020400(Tnip1),ENSMUSG00000020573(Pik3cg),ENSMUSG00000021025(Nfkbia),ENSMUSG00000022892(App),ENSMUSG00000023088(Abcc1),ENSMUSG00000024164(C3),ENSMUSG00000024379(Tslp),ENSMUSG00000024401(Tnf),ENSMUSG000000…	ENSMUSG00000001741(Il16),ENSMUSG00000010047(Hyal2),ENSMUSG00000014158(Trpv4),ENSMUSG00000024975(Pdcd4),ENSMUSG00000026012(Cd28),ENSMUSG00000027239(Mdk),ENSMUSG00000031565(Fgfr1),ENSMUSG00000034957(Cebpa),ENSMUSG00000038481(Cdk19),ENSMUSG00000039005(Tlr4),ENSMUSG00000044968(Napepld),ENSMUSG00000049103(Ccr2),ENSMUSG00000049709(Nlrp10),ENSMUSG00000062515(Fabp4)
BP	GO:0045935	positive regulation of nucleobase-containing compound metabolic process	247	214	461	1886	5.10589e-14	2.55933e-12	ENSMUSG00000000078(Klf6),ENSMUSG00000000275(Trim25),ENSMUSG00000000441(Raf1),ENSMUSG00000000532(Acvr1b),ENSMUSG00000000730(Dnmt3l),ENSMUSG00000000982(Ccl3),ENSMUSG00000001288(Rarg),ENSMUSG00000001416(Cct3),ENSMUSG00000001542(Ell2),ENSMUSG00000001627(Ifrd1),ENSMUSG00000001632(Brpf1),ENSMUSG00000001785(Pwp1),ENSMUSG00000002111(Spi1),ENSMUSG00000002227(Mov10),ENSMUSG00000002307(Daxx),ENSMUSG00000002…	ENSMUSG00000000440(Pparg),ENSMUSG00000000869(Il4),ENSMUSG00000001552(Jup),ENSMUSG00000001761(Smo),ENSMUSG00000002409(Dyrk1b),ENSMUSG00000003282(Plag1),ENSMUSG00000003575(Crtc1),ENSMUSG00000003992(Ssbp2),ENSMUSG00000004151(Etv1),ENSMUSG00000005198(Polr2a),ENSMUSG00000005583(Mef2c),ENSMUSG00000005718(Tfap4),ENSMUSG00000005893(Nr2c2),ENSMUSG00000006288(Ttc5),ENSMUSG00000008855(Hdac5),ENSMUSG00000010…
BP	GO:0051716	cellular response to stimulus	907	741	1648	8071	5.3195e-14	2.65788e-12	ENSMUSG00000000184(Ccnd2),ENSMUSG00000000275(Trim25),ENSMUSG00000000409(Lck),ENSMUSG00000000441(Raf1),ENSMUSG00000000532(Acvr1b),ENSMUSG00000000555(Itga5),ENSMUSG00000000628(Hk2),ENSMUSG00000000732(Icosl),ENSMUSG00000000915(Hip1r),ENSMUSG00000000957(Mmp14),ENSMUSG00000000982(Ccl3),ENSMUSG00000001098(Kctd10),ENSMUSG00000001123(Lgals9),ENSMUSG00000001175(Calm1),ENSMUSG00000001248(Gramd1a),ENSMUSG00…	ENSMUSG00000000028(Cdc45),ENSMUSG00000000149(Gna12),ENSMUSG00000000282(Mnt),ENSMUSG00000000326(Comt),ENSMUSG00000000440(Pparg),ENSMUSG00000000631(Myo18a),ENSMUSG00000000693(Loxl3),ENSMUSG00000000751(Rpa1),ENSMUSG00000000869(Il4),ENSMUSG00000001227(Sema6b),ENSMUSG00000001228(Uhrf1),ENSMUSG00000001482(Def8),ENSMUSG00000001552(Jup),ENSMUSG00000001741(Il16),ENSMUSG00000001761(Smo),ENSMUSG00000001995(…
BP	GO:0034612	response to tumor necrosis factor	60	26	86	218	5.3562e-14	2.66769e-12	ENSMUSG00000000982(Ccl3),ENSMUSG00000015839(Nfe2l2),ENSMUSG00000017652(Cd40),ENSMUSG00000018899(Irf1),ENSMUSG00000018920(Cxcl16),ENSMUSG00000018930(Ccl4),ENSMUSG00000019122(Ccl9),ENSMUSG00000020696(Rffl),ENSMUSG00000021025(Nfkbia),ENSMUSG00000021277(Traf3),ENSMUSG00000021367(Edn1),ENSMUSG00000021457(Syk),ENSMUSG00000024401(Tnf),ENSMUSG00000024539(Ptpn2),ENSMUSG00000024778(Fas),ENSMUSG00000024789(…	ENSMUSG00000004071(Cdip1),ENSMUSG00000010047(Hyal2),ENSMUSG00000010051(Hyal1),ENSMUSG00000013483(Card14),ENSMUSG00000017146(Brca1),ENSMUSG00000020889(Nr1d1),ENSMUSG00000021127(Zfp36l1),ENSMUSG00000022367(Has2),ENSMUSG00000023019(Gpd1),ENSMUSG00000023826(Prkn),ENSMUSG00000023915(Tnfrsf21),ENSMUSG00000028101(Pias3),ENSMUSG00000029821(Gsdme),ENSMUSG00000031451(Gas6),ENSMUSG00000032238(Rora),ENSMUSG0…
BP	GO:0035239	tube morphogenesis	142	105	247	886	5.49178e-14	2.72654e-12	ENSMUSG00000000555(Itga5),ENSMUSG00000000628(Hk2),ENSMUSG00000000957(Mmp14),ENSMUSG00000001052(Sec24b),ENSMUSG00000001098(Kctd10),ENSMUSG00000001288(Rarg),ENSMUSG00000001300(Efnb2),ENSMUSG00000001435(Col18a1),ENSMUSG00000001632(Brpf1),ENSMUSG00000002111(Spi1),ENSMUSG00000004040(Stat3),ENSMUSG00000004296(Il12b),ENSMUSG00000005413(Hmox1),ENSMUSG00000006705(Pknox1),ENSMUSG00000007655(Cav1),ENSMUSG00…	ENSMUSG00000000440(Pparg),ENSMUSG00000001552(Jup),ENSMUSG00000001761(Smo),ENSMUSG00000002289(Angptl4),ENSMUSG00000004105(Angptl2),ENSMUSG00000004565(Pnpla6),ENSMUSG00000004698(Hdac9),ENSMUSG00000005583(Mef2c),ENSMUSG00000005958(Ephb3),ENSMUSG00000006235(Epor),ENSMUSG00000008855(Hdac5),ENSMUSG00000010051(Hyal1),ENSMUSG00000014164(Klhl3),ENSMUSG00000015846(Rxra),ENSMUSG00000016933(Plcg1),ENSMUSG000…
BP	GO:0035295	tube development	164	132	296	1108	5.54617e-14	2.74483e-12	ENSMUSG00000000555(Itga5),ENSMUSG00000000628(Hk2),ENSMUSG00000000957(Mmp14),ENSMUSG00000001052(Sec24b),ENSMUSG00000001098(Kctd10),ENSMUSG00000001288(Rarg),ENSMUSG00000001300(Efnb2),ENSMUSG00000001435(Col18a1),ENSMUSG00000001632(Brpf1),ENSMUSG00000002111(Spi1),ENSMUSG00000004040(Stat3),ENSMUSG00000004266(Ptpn6),ENSMUSG00000004296(Il12b),ENSMUSG00000004936(Map2k1),ENSMUSG00000005413(Hmox1),ENSMUSG0…	ENSMUSG00000000440(Pparg),ENSMUSG00000000693(Loxl3),ENSMUSG00000001552(Jup),ENSMUSG00000001761(Smo),ENSMUSG00000002289(Angptl4),ENSMUSG00000004105(Angptl2),ENSMUSG00000004565(Pnpla6),ENSMUSG00000004698(Hdac9),ENSMUSG00000005583(Mef2c),ENSMUSG00000005958(Ephb3),ENSMUSG00000006235(Epor),ENSMUSG00000008855(Hdac5),ENSMUSG00000010051(Hyal1),ENSMUSG00000014164(Klhl3),ENSMUSG00000015846(Rxra),ENSMUSG000…
MF	GO:0016788	hydrolase activity, acting on ester bonds	90	122	212	730	5.63832e-14	2.78163e-12	ENSMUSG00000000409(Lck),ENSMUSG00000001348(Acp5),ENSMUSG00000002103(Acp2),ENSMUSG00000002847(Pla1a),ENSMUSG00000003848(Nob1),ENSMUSG00000004266(Ptpn6),ENSMUSG00000005413(Hmox1),ENSMUSG00000007036(Abhd16a),ENSMUSG00000009630(Ppp2cb),ENSMUSG00000014956(Ppp1cb),ENSMUSG00000015474(Ppt2),ENSMUSG00000018559(Ctdnep1),ENSMUSG00000018583(G3bp1),ENSMUSG00000020349(Ppp2ca),ENSMUSG00000020464(Pnpt1),ENSMUSG0…	ENSMUSG00000000686(Abhd15),ENSMUSG00000001942(Siae),ENSMUSG00000002329(Mdp1),ENSMUSG00000003518(Dusp3),ENSMUSG00000003812(Dnase2a),ENSMUSG00000004347(Pde1c),ENSMUSG00000004565(Pnpla6),ENSMUSG00000005043(Sgsh),ENSMUSG00000005447(Pafah1b3),ENSMUSG00000005682(Pan2),ENSMUSG00000006800(Sulf2),ENSMUSG00000007080(Pole),ENSMUSG00000007950(Abhd8),ENSMUSG00000010461(Eya4),ENSMUSG00000010751(Tnfrsf22),ENSMU…
BP	GO:0002449	lymphocyte mediated immunity	65	28	93	244	5.95813e-14	2.93016e-12	ENSMUSG00000000732(Icosl),ENSMUSG00000001123(Lgals9),ENSMUSG00000004043(Stat5a),ENSMUSG00000004266(Ptpn6),ENSMUSG00000004296(Il12b),ENSMUSG00000015316(Slamf1),ENSMUSG00000017652(Cd40),ENSMUSG00000017776(Crk),ENSMUSG00000020437(Myo1g),ENSMUSG00000020641(Rsad2),ENSMUSG00000021948(Prkcd),ENSMUSG00000024164(C3),ENSMUSG00000024339(Tap2),ENSMUSG00000024401(Tnf),ENSMUSG00000024402(Lta),ENSMUSG0000002477…	ENSMUSG00000000869(Il4),ENSMUSG00000003882(Il7r),ENSMUSG00000005370(Msh6),ENSMUSG00000006611(Hfe),ENSMUSG00000017550(Atad5),ENSMUSG00000018752(Tnfsfm13),ENSMUSG00000019726(Lyst),ENSMUSG00000020101(Vsir),ENSMUSG00000020399(Havcr2),ENSMUSG00000024151(Msh2),ENSMUSG00000025880(Smad7),ENSMUSG00000026012(Cd28),ENSMUSG00000026288(Inpp5d),ENSMUSG00000026471(Mr1),ENSMUSG00000029468(P2rx7),ENSMUSG000000295…
BP	GO:1901699	cellular response to nitrogen compound	119	85	204	698	7.00237e-14	3.43292e-12	ENSMUSG00000002307(Daxx),ENSMUSG00000004040(Stat3),ENSMUSG00000004043(Stat5a),ENSMUSG00000005057(Sh2b2),ENSMUSG00000007655(Cav1),ENSMUSG00000015340(Cybb),ENSMUSG00000015839(Nfe2l2),ENSMUSG00000017776(Crk),ENSMUSG00000018736(Ndel1),ENSMUSG00000018899(Irf1),ENSMUSG00000020122(Egfr),ENSMUSG00000020300(Cpeb4),ENSMUSG00000020572(Nampt),ENSMUSG00000020573(Pik3cg),ENSMUSG00000020599(Rgs9),ENSMUSG0000002…	ENSMUSG00000000440(Pparg),ENSMUSG00000001552(Jup),ENSMUSG00000004099(Dnmt1),ENSMUSG00000004698(Hdac9),ENSMUSG00000005514(Por),ENSMUSG00000005583(Mef2c),ENSMUSG00000015944(Castor2),ENSMUSG00000017146(Brca1),ENSMUSG00000020027(Socs2),ENSMUSG00000020091(Eif4ebp2),ENSMUSG00000020189(Osbpl8),ENSMUSG00000020263(Appl2),ENSMUSG00000020424(Castor1),ENSMUSG00000020546(Stxbp4),ENSMUSG00000020593(Lpin1),ENSM…
BP	GO:0043410	positive regulation of MAPK cascade	97	65	162	519	7.31813e-14	3.57651e-12	ENSMUSG00000000441(Raf1),ENSMUSG00000000982(Ccl3),ENSMUSG00000002413(Braf),ENSMUSG00000004936(Map2k1),ENSMUSG00000005087(Cd44),ENSMUSG00000012519(Mlkl),ENSMUSG00000015312(Gadd45b),ENSMUSG00000015316(Slamf1),ENSMUSG00000017291(Taok1),ENSMUSG00000017652(Cd40),ENSMUSG00000018334(Ksr1),ENSMUSG00000018930(Ccl4),ENSMUSG00000019122(Ccl9),ENSMUSG00000020122(Egfr),ENSMUSG00000020573(Pik3cg),ENSMUSG0000002…	ENSMUSG00000005583(Mef2c),ENSMUSG00000006235(Epor),ENSMUSG00000014158(Trpv4),ENSMUSG00000014426(Map3k4),ENSMUSG00000017466(Timp2),ENSMUSG00000018849(Wwc1),ENSMUSG00000019768(Esr1),ENSMUSG00000019966(Kitl),ENSMUSG00000020312(Shc2),ENSMUSG00000020399(Havcr2),ENSMUSG00000020623(Map2k6),ENSMUSG00000020689(Itgb3),ENSMUSG00000020888(Dvl2),ENSMUSG00000021253(Tgfb3),ENSMUSG00000021453(Gadd45g),ENSMUSG000…
BP	GO:0044085	cellular component biogenesis	348	323	671	2928	7.86826e-14	3.83339e-12	ENSMUSG00000000441(Raf1),ENSMUSG00000000555(Itga5),ENSMUSG00000000915(Hip1r),ENSMUSG00000000957(Mmp14),ENSMUSG00000001056(Nhp2),ENSMUSG00000001098(Kctd10),ENSMUSG00000001300(Efnb2),ENSMUSG00000001305(Rrp15),ENSMUSG00000001416(Cct3),ENSMUSG00000001440(Kpnb1),ENSMUSG00000001785(Pwp1),ENSMUSG00000002233(Rhoc),ENSMUSG00000002307(Daxx),ENSMUSG00000002413(Braf),ENSMUSG00000002477(Snrpd1),ENSMUSG0000000…	ENSMUSG00000000028(Cdc45),ENSMUSG00000001482(Def8),ENSMUSG00000001552(Jup),ENSMUSG00000002031(Ift46),ENSMUSG00000002055(Spag5),ENSMUSG00000002083(Bbc3),ENSMUSG00000002107(Celf2),ENSMUSG00000002486(Tchp),ENSMUSG00000002835(Chaf1a),ENSMUSG00000002870(Mcm2),ENSMUSG00000003452(Bicd1),ENSMUSG00000003518(Dusp3),ENSMUSG00000003575(Crtc1),ENSMUSG00000004099(Dnmt1),ENSMUSG00000004530(Coro1c),ENSMUSG000000…
BP	GO:0033043	regulation of organelle organization	180	151	331	1274	9.05806e-14	4.39935e-12	ENSMUSG00000000628(Hk2),ENSMUSG00000000915(Hip1r),ENSMUSG00000001052(Sec24b),ENSMUSG00000001416(Cct3),ENSMUSG00000002111(Spi1),ENSMUSG00000002233(Rhoc),ENSMUSG00000002413(Braf),ENSMUSG00000002812(Flii),ENSMUSG00000002845(Tmem39a),ENSMUSG00000003283(Hck),ENSMUSG00000004446(Bid),ENSMUSG00000004936(Map2k1),ENSMUSG00000005732(Ranbp1),ENSMUSG00000006740(Kif5b),ENSMUSG00000007655(Cav1),ENSMUSG000000088…	ENSMUSG00000000028(Cdc45),ENSMUSG00000002031(Ift46),ENSMUSG00000002055(Spag5),ENSMUSG00000002083(Bbc3),ENSMUSG00000002486(Tchp),ENSMUSG00000002870(Mcm2),ENSMUSG00000003378(Grik5),ENSMUSG00000003452(Bicd1),ENSMUSG00000004099(Dnmt1),ENSMUSG00000005583(Mef2c),ENSMUSG00000005682(Pan2),ENSMUSG00000014158(Trpv4),ENSMUSG00000014426(Map3k4),ENSMUSG00000014778(Fhod1),ENSMUSG00000015711(Prune1),ENSMUSG0000…
BP	GO:0002573	myeloid leukocyte differentiation	54	32	86	220	9.88044e-14	4.78391e-12	ENSMUSG00000000982(Ccl3),ENSMUSG00000002111(Spi1),ENSMUSG00000002983(Relb),ENSMUSG00000003070(Efna2),ENSMUSG00000004043(Stat5a),ENSMUSG00000004296(Il12b),ENSMUSG00000014599(Csf1),ENSMUSG00000018916(Csf2),ENSMUSG00000022346(Myc),ENSMUSG00000022831(Hcls1),ENSMUSG00000022892(App),ENSMUSG00000023964(Calcr),ENSMUSG00000024245(Tmem178),ENSMUSG00000024401(Tnf),ENSMUSG00000024539(Ptpn2),ENSMUSG0000002481…	ENSMUSG00000000440(Pparg),ENSMUSG00000000869(Il4),ENSMUSG00000005583(Mef2c),ENSMUSG00000006362(Cbfa2t3),ENSMUSG00000019966(Kitl),ENSMUSG00000020689(Itgb3),ENSMUSG00000021127(Zfp36l1),ENSMUSG00000021250(Fos),ENSMUSG00000021356(Irf4),ENSMUSG00000022105(Rb1),ENSMUSG00000024986(Hhex),ENSMUSG00000026288(Inpp5d),ENSMUSG00000027339(Rassf2),ENSMUSG00000028086(Fbxw7),ENSMUSG00000028101(Pias3),ENSMUSG00000…
BP	GO:0033036	macromolecule localization	341	325	666	2907	1.06706e-13	5.15055e-12	ENSMUSG00000000275(Trim25),ENSMUSG00000000441(Raf1),ENSMUSG00000000628(Hk2),ENSMUSG00000000957(Mmp14),ENSMUSG00000001052(Sec24b),ENSMUSG00000001123(Lgals9),ENSMUSG00000001175(Calm1),ENSMUSG00000001248(Gramd1a),ENSMUSG00000001300(Efnb2),ENSMUSG00000001416(Cct3),ENSMUSG00000001440(Kpnb1),ENSMUSG00000001467(Cyp51),ENSMUSG00000002413(Braf),ENSMUSG00000003352(Cacnb3),ENSMUSG00000003948(Mmd),ENSMUSG000…	ENSMUSG00000000037(Scml2),ENSMUSG00000000440(Pparg),ENSMUSG00000000631(Myo18a),ENSMUSG00000000751(Rpa1),ENSMUSG00000000881(Dlg3),ENSMUSG00000001143(Lman2l),ENSMUSG00000001552(Jup),ENSMUSG00000001761(Smo),ENSMUSG00000002031(Ift46),ENSMUSG00000002055(Spag5),ENSMUSG00000002068(Ccne1),ENSMUSG00000002083(Bbc3),ENSMUSG00000002104(Rapsn),ENSMUSG00000002910(Arrdc2),ENSMUSG00000003134(Tbc1d8),ENSMUSG00000…
BP	GO:1901698	response to nitrogen compound	193	118	311	1183	1.11628e-13	5.36475e-12	ENSMUSG00000000275(Trim25),ENSMUSG00000001175(Calm1),ENSMUSG00000002307(Daxx),ENSMUSG00000002413(Braf),ENSMUSG00000002997(Prkar2b),ENSMUSG00000003849(Nqo1),ENSMUSG00000004040(Stat3),ENSMUSG00000004043(Stat5a),ENSMUSG00000005057(Sh2b2),ENSMUSG00000007655(Cav1),ENSMUSG00000014226(Cacybp),ENSMUSG00000015340(Cybb),ENSMUSG00000015839(Nfe2l2),ENSMUSG00000016529(Il10),ENSMUSG00000017652(Cd40),ENSMUSG000…	ENSMUSG00000000440(Pparg),ENSMUSG00000001552(Jup),ENSMUSG00000004099(Dnmt1),ENSMUSG00000004698(Hdac9),ENSMUSG00000005514(Por),ENSMUSG00000005583(Mef2c),ENSMUSG00000008855(Hdac5),ENSMUSG00000010663(Fads1),ENSMUSG00000014158(Trpv4),ENSMUSG00000014905(Dnajb9),ENSMUSG00000015944(Castor2),ENSMUSG00000016552(Foxred2),ENSMUSG00000017146(Brca1),ENSMUSG00000017697(Ada),ENSMUSG00000020027(Socs2),ENSMUSG000…
CC	GO:0012505	endomembrane system	490	389	879	3997	1.1183e-13	5.36475e-12	ENSMUSG00000000184(Ccnd2),ENSMUSG00000000441(Raf1),ENSMUSG00000000555(Itga5),ENSMUSG00000000628(Hk2),ENSMUSG00000000915(Hip1r),ENSMUSG00000000957(Mmp14),ENSMUSG00000001052(Sec24b),ENSMUSG00000001175(Calm1),ENSMUSG00000001248(Gramd1a),ENSMUSG00000001440(Kpnb1),ENSMUSG00000001467(Cyp51),ENSMUSG00000001785(Pwp1),ENSMUSG00000002105(Slc39a13),ENSMUSG00000002845(Tmem39a),ENSMUSG00000002847(Pla1a),ENSMU…	ENSMUSG00000000631(Myo18a),ENSMUSG00000001143(Lman2l),ENSMUSG00000001761(Smo),ENSMUSG00000001865(Cpa3),ENSMUSG00000002083(Bbc3),ENSMUSG00000002104(Rapsn),ENSMUSG00000002732(Fkbp7),ENSMUSG00000003153(Slc2a3),ENSMUSG00000003378(Grik5),ENSMUSG00000003452(Bicd1),ENSMUSG00000003484(Cyp4f18),ENSMUSG00000004071(Cdip1),ENSMUSG00000004530(Coro1c),ENSMUSG00000004565(Pnpla6),ENSMUSG00000005370(Msh6),ENSMUSG…
BP	GO:0050900	leukocyte migration	90	31	121	354	1.13238e-13	5.4157e-12	ENSMUSG00000000957(Mmp14),ENSMUSG00000000982(Ccl3),ENSMUSG00000001123(Lgals9),ENSMUSG00000002897(Il17ra),ENSMUSG00000011008(Mcoln2),ENSMUSG00000014599(Csf1),ENSMUSG00000015316(Slamf1),ENSMUSG00000017631(Abr),ENSMUSG00000017737(Mmp9),ENSMUSG00000017776(Crk),ENSMUSG00000018920(Cxcl16),ENSMUSG00000018930(Ccl4),ENSMUSG00000019122(Ccl9),ENSMUSG00000020272(Stk10),ENSMUSG00000020437(Myo1g),ENSMUSG000000…	ENSMUSG00000000869(Il4),ENSMUSG00000001741(Il16),ENSMUSG00000014158(Trpv4),ENSMUSG00000015766(Eps8),ENSMUSG00000017697(Ada),ENSMUSG00000019966(Kitl),ENSMUSG00000020689(Itgb3),ENSMUSG00000021699(Pde4d),ENSMUSG00000022667(Cd200r1),ENSMUSG00000024962(Vegfb),ENSMUSG00000026271(Gpr35),ENSMUSG00000027111(Itga6),ENSMUSG00000027239(Mdk),ENSMUSG00000027843(Ptpn22),ENSMUSG00000028413(B4galt1),ENSMUSG000000…
BP	GO:0010467	gene expression	702	512	1214	5748	1.17558e-13	5.60515e-12	ENSMUSG00000000078(Klf6),ENSMUSG00000000275(Trim25),ENSMUSG00000000317(Bcl6b),ENSMUSG00000000385(Tmprss2),ENSMUSG00000000409(Lck),ENSMUSG00000000441(Raf1),ENSMUSG00000000532(Acvr1b),ENSMUSG00000000730(Dnmt3l),ENSMUSG00000000732(Icosl),ENSMUSG00000000776(Polr3d),ENSMUSG00000000838(Fmr1),ENSMUSG00000000957(Mmp14),ENSMUSG00000000982(Ccl3),ENSMUSG00000001056(Nhp2),ENSMUSG00000001123(Lgals9),ENSMUSG00…	ENSMUSG00000000028(Cdc45),ENSMUSG00000000037(Scml2),ENSMUSG00000000282(Mnt),ENSMUSG00000000440(Pparg),ENSMUSG00000000693(Loxl3),ENSMUSG00000000869(Il4),ENSMUSG00000001228(Uhrf1),ENSMUSG00000001552(Jup),ENSMUSG00000001741(Il16),ENSMUSG00000001761(Smo),ENSMUSG00000002068(Ccne1),ENSMUSG00000002107(Celf2),ENSMUSG00000002409(Dyrk1b),ENSMUSG00000002486(Tchp),ENSMUSG00000002731(Prkra),ENSMUSG00000003282…
BP	GO:0045619	regulation of lymphocyte differentiation	47	27	74	178	1.32656e-13	6.30581e-12	ENSMUSG00000000409(Lck),ENSMUSG00000000957(Mmp14),ENSMUSG00000001123(Lgals9),ENSMUSG00000002413(Braf),ENSMUSG00000002602(Axl),ENSMUSG00000004043(Stat5a),ENSMUSG00000004266(Ptpn6),ENSMUSG00000015396(Cd83),ENSMUSG00000016529(Il10),ENSMUSG00000018899(Irf1),ENSMUSG00000019982(Myb),ENSMUSG00000021270(Hsp90aa1),ENSMUSG00000021457(Syk),ENSMUSG00000023206(Il15ra),ENSMUSG00000024238(Zeb1),ENSMUSG000000243…	ENSMUSG00000000693(Loxl3),ENSMUSG00000000869(Il4),ENSMUSG00000003882(Il7r),ENSMUSG00000017697(Ada),ENSMUSG00000020101(Vsir),ENSMUSG00000021127(Zfp36l1),ENSMUSG00000022672(Prkdc),ENSMUSG00000025880(Smad7),ENSMUSG00000026012(Cd28),ENSMUSG00000026288(Inpp5d),ENSMUSG00000026842(Abl1),ENSMUSG00000027239(Mdk),ENSMUSG00000029204(Rhoh),ENSMUSG00000031101(Sash3),ENSMUSG00000031451(Gas6),ENSMUSG00000032440…
BP	GO:0051056	regulation of small GTPase mediated signal transduction	49	38	87	225	1.47816e-13	7.00513e-12	ENSMUSG00000001098(Kctd10),ENSMUSG00000004936(Map2k1),ENSMUSG00000004952(Rasa4),ENSMUSG00000005057(Sh2b2),ENSMUSG00000009376(Met),ENSMUSG00000009630(Ppp2cb),ENSMUSG00000014599(Csf1),ENSMUSG00000017776(Crk),ENSMUSG00000020573(Pik3cg),ENSMUSG00000021215(Net1),ENSMUSG00000021675(F2rl2),ENSMUSG00000021895(Arhgef3),ENSMUSG00000024277(Mapre2),ENSMUSG00000024620(Pdgfrb),ENSMUSG00000024976(Shoc2),ENSMUSG…	ENSMUSG00000001995(Sipa1l2),ENSMUSG00000004633(Chn2),ENSMUSG00000015766(Eps8),ENSMUSG00000017132(Cyth1),ENSMUSG00000017466(Timp2),ENSMUSG00000019852(Arfgef3),ENSMUSG00000019966(Kitl),ENSMUSG00000022114(Spry2),ENSMUSG00000025154(Arhgap19),ENSMUSG00000026271(Gpr35),ENSMUSG00000026842(Abl1),ENSMUSG00000028832(Stmn1),ENSMUSG00000030047(Arhgap25),ENSMUSG00000030134(Rasgef1a),ENSMUSG00000031214(Ophn1),…
BP	GO:0032946	positive regulation of mononuclear cell proliferation	39	21	60	131	1.676e-13	7.91874e-12	ENSMUSG00000000732(Icosl),ENSMUSG00000004043(Stat5a),ENSMUSG00000004296(Il12b),ENSMUSG00000004709(Cd244a),ENSMUSG00000014599(Csf1),ENSMUSG00000015316(Slamf1),ENSMUSG00000016496(Cd274),ENSMUSG00000017652(Cd40),ENSMUSG00000020134(Peli1),ENSMUSG00000021457(Syk),ENSMUSG00000022901(Cd86),ENSMUSG00000023067(Cdkn1a),ENSMUSG00000025383(Il23a),ENSMUSG00000025746(Il6),ENSMUSG00000026395(Ptprc),ENSMUSG00000…	ENSMUSG00000000869(Il4),ENSMUSG00000005583(Mef2c),ENSMUSG00000017550(Atad5),ENSMUSG00000017697(Ada),ENSMUSG00000020399(Havcr2),ENSMUSG00000021756(Il6st),ENSMUSG00000022885(St6gal1),ENSMUSG00000026012(Cd28),ENSMUSG00000027544(Nfatc2),ENSMUSG00000027843(Ptpn22),ENSMUSG00000030528(Blm),ENSMUSG00000031101(Sash3),ENSMUSG00000031217(Efnb1),ENSMUSG00000031497(Tnfsf13b),ENSMUSG00000032440(Tgfbr2),ENSMUSG…
BP	GO:0050870	positive regulation of T cell activation	53	25	78	193	1.76623e-13	8.31991e-12	ENSMUSG00000000409(Lck),ENSMUSG00000000732(Icosl),ENSMUSG00000001123(Lgals9),ENSMUSG00000001300(Efnb2),ENSMUSG00000004043(Stat5a),ENSMUSG00000004296(Il12b),ENSMUSG00000004709(Cd244a),ENSMUSG00000007655(Cav1),ENSMUSG00000015316(Slamf1),ENSMUSG00000015396(Cd83),ENSMUSG00000016496(Cd274),ENSMUSG00000018899(Irf1),ENSMUSG00000019982(Myb),ENSMUSG00000021270(Hsp90aa1),ENSMUSG00000021457(Syk),ENSMUSG0000…	ENSMUSG00000000869(Il4),ENSMUSG00000003882(Il7r),ENSMUSG00000017697(Ada),ENSMUSG00000020101(Vsir),ENSMUSG00000020399(Havcr2),ENSMUSG00000021756(Il6st),ENSMUSG00000026012(Cd28),ENSMUSG00000027239(Mdk),ENSMUSG00000027843(Ptpn22),ENSMUSG00000029204(Rhoh),ENSMUSG00000029869(Ephb6),ENSMUSG00000030528(Blm),ENSMUSG00000031101(Sash3),ENSMUSG00000031217(Efnb1),ENSMUSG00000031497(Tnfsf13b),ENSMUSG000000324…
BP	GO:0032675	regulation of interleukin-6 production	44	21	65	148	1.90679e-13	8.95505e-12	ENSMUSG00000001123(Lgals9),ENSMUSG00000002897(Il17ra),ENSMUSG00000004040(Stat3),ENSMUSG00000004266(Ptpn6),ENSMUSG00000008496(Pou2f2),ENSMUSG00000015316(Slamf1),ENSMUSG00000016528(Mapkapk2),ENSMUSG00000016529(Il10),ENSMUSG00000018500(Adora2b),ENSMUSG00000019850(Tnfaip3),ENSMUSG00000020227(Irak3),ENSMUSG00000021457(Syk),ENSMUSG00000022749(Tbc1d23),ENSMUSG00000022892(App),ENSMUSG00000024379(Tslp),EN…	ENSMUSG00000001741(Il16),ENSMUSG00000010047(Hyal2),ENSMUSG00000014158(Trpv4),ENSMUSG00000020399(Havcr2),ENSMUSG00000022667(Cd200r1),ENSMUSG00000022708(Zbtb20),ENSMUSG00000026288(Inpp5d),ENSMUSG00000027843(Ptpn22),ENSMUSG00000027947(Il6ra),ENSMUSG00000028864(Hgf),ENSMUSG00000029468(P2rx7),ENSMUSG00000031451(Gas6),ENSMUSG00000032109(Nlrx1),ENSMUSG00000034610(Tut4),ENSMUSG00000039005(Tlr4),ENSMUSG00…
MF	GO:0046872	metal ion binding	426	461	887	4036	1.99754e-13	9.35316e-12	ENSMUSG00000000275(Trim25),ENSMUSG00000000317(Bcl6b),ENSMUSG00000000441(Raf1),ENSMUSG00000000532(Acvr1b),ENSMUSG00000000555(Itga5),ENSMUSG00000000730(Dnmt3l),ENSMUSG00000000957(Mmp14),ENSMUSG00000001052(Sec24b),ENSMUSG00000001175(Calm1),ENSMUSG00000001288(Rarg),ENSMUSG00000001348(Acp5),ENSMUSG00000001435(Col18a1),ENSMUSG00000001467(Cyp51),ENSMUSG00000001630(Stk38l),ENSMUSG00000001632(Brpf1),ENSMU…	ENSMUSG00000000149(Gna12),ENSMUSG00000000253(Gmpr),ENSMUSG00000000326(Comt),ENSMUSG00000000440(Pparg),ENSMUSG00000000693(Loxl3),ENSMUSG00000000751(Rpa1),ENSMUSG00000001054(Rmnd5b),ENSMUSG00000001143(Lman2l),ENSMUSG00000001228(Uhrf1),ENSMUSG00000001482(Def8),ENSMUSG00000001865(Cpa3),ENSMUSG00000002104(Rapsn),ENSMUSG00000002329(Mdp1),ENSMUSG00000002732(Fkbp7),ENSMUSG00000002870(Mcm2),ENSMUSG0000000…
CC	GO:0031982	vesicle	275	214	489	2040	2.09059e-13	9.75961e-12	ENSMUSG00000000409(Lck),ENSMUSG00000000555(Itga5),ENSMUSG00000000915(Hip1r),ENSMUSG00000000957(Mmp14),ENSMUSG00000001052(Sec24b),ENSMUSG00000001175(Calm1),ENSMUSG00000001248(Gramd1a),ENSMUSG00000002103(Acp2),ENSMUSG00000002233(Rhoc),ENSMUSG00000002847(Pla1a),ENSMUSG00000003283(Hck),ENSMUSG00000003863(Ppfia3),ENSMUSG00000003948(Mmd),ENSMUSG00000004296(Il12b),ENSMUSG00000004936(Map2k1),ENSMUSG00000…	ENSMUSG00000000631(Myo18a),ENSMUSG00000001053(N4bp3),ENSMUSG00000001143(Lman2l),ENSMUSG00000001228(Uhrf1),ENSMUSG00000001751(Naglu),ENSMUSG00000001761(Smo),ENSMUSG00000001865(Cpa3),ENSMUSG00000002910(Arrdc2),ENSMUSG00000003153(Slc2a3),ENSMUSG00000003452(Bicd1),ENSMUSG00000004071(Cdip1),ENSMUSG00000004530(Coro1c),ENSMUSG00000004768(Rab23),ENSMUSG00000004798(Ulk2),ENSMUSG00000005949(Ctns),ENSMUSG00…
BP	GO:0032944	regulation of mononuclear cell proliferation	57	28	85	219	2.1947e-13	1.02152e-11	ENSMUSG00000000732(Icosl),ENSMUSG00000001123(Lgals9),ENSMUSG00000004043(Stat5a),ENSMUSG00000004266(Ptpn6),ENSMUSG00000004296(Il12b),ENSMUSG00000004709(Cd244a),ENSMUSG00000014599(Csf1),ENSMUSG00000015316(Slamf1),ENSMUSG00000016496(Cd274),ENSMUSG00000016529(Il10),ENSMUSG00000017009(Sdc4),ENSMUSG00000017652(Cd40),ENSMUSG00000018899(Irf1),ENSMUSG00000020134(Peli1),ENSMUSG00000021457(Syk),ENSMUSG00000…	ENSMUSG00000000869(Il4),ENSMUSG00000005583(Mef2c),ENSMUSG00000017550(Atad5),ENSMUSG00000017697(Ada),ENSMUSG00000020101(Vsir),ENSMUSG00000020399(Havcr2),ENSMUSG00000021756(Il6st),ENSMUSG00000022885(St6gal1),ENSMUSG00000023915(Tnfrsf21),ENSMUSG00000026012(Cd28),ENSMUSG00000026288(Inpp5d),ENSMUSG00000027544(Nfatc2),ENSMUSG00000027843(Ptpn22),ENSMUSG00000030365(Clec2i),ENSMUSG00000030528(Blm),ENSMUSG…
BP	GO:0043405	regulation of MAP kinase activity	61	46	107	302	2.20633e-13	1.02388e-11	ENSMUSG00000000441(Raf1),ENSMUSG00000002413(Braf),ENSMUSG00000004266(Ptpn6),ENSMUSG00000004936(Map2k1),ENSMUSG00000007655(Cav1),ENSMUSG00000012519(Mlkl),ENSMUSG00000015312(Gadd45b),ENSMUSG00000017652(Cd40),ENSMUSG00000018334(Ksr1),ENSMUSG00000020122(Egfr),ENSMUSG00000020227(Irak3),ENSMUSG00000020573(Pik3cg),ENSMUSG00000020901(Pik3r5),ENSMUSG00000021367(Edn1),ENSMUSG00000021457(Syk),ENSMUSG0000002…	ENSMUSG00000003518(Dusp3),ENSMUSG00000005583(Mef2c),ENSMUSG00000010047(Hyal2),ENSMUSG00000014426(Map3k4),ENSMUSG00000018669(Cdk5rap3),ENSMUSG00000019960(Dusp6),ENSMUSG00000019966(Kitl),ENSMUSG00000020312(Shc2),ENSMUSG00000020623(Map2k6),ENSMUSG00000020888(Dvl2),ENSMUSG00000021253(Tgfb3),ENSMUSG00000021453(Gadd45g),ENSMUSG00000022114(Spry2),ENSMUSG00000022414(Tab1),ENSMUSG00000022788(Fgd4),ENSMUSG…
BP	GO:0097190	apoptotic signaling pathway	110	67	177	589	2.29934e-13	1.06389e-11	ENSMUSG00000000409(Lck),ENSMUSG00000000441(Raf1),ENSMUSG00000000532(Acvr1b),ENSMUSG00000000915(Hip1r),ENSMUSG00000001707(Eef1e1),ENSMUSG00000004221(Ikbkg),ENSMUSG00000004446(Bid),ENSMUSG00000004936(Map2k1),ENSMUSG00000005087(Cd44),ENSMUSG00000005413(Hmox1),ENSMUSG00000006818(Sod2),ENSMUSG00000007655(Cav1),ENSMUSG00000015839(Nfe2l2),ENSMUSG00000016524(Il19),ENSMUSG00000017737(Mmp9),ENSMUSG00000018…	ENSMUSG00000000282(Mnt),ENSMUSG00000000869(Il4),ENSMUSG00000002083(Bbc3),ENSMUSG00000002731(Prkra),ENSMUSG00000004071(Cdip1),ENSMUSG00000005370(Msh6),ENSMUSG00000005718(Tfap4),ENSMUSG00000010047(Hyal2),ENSMUSG00000010461(Eya4),ENSMUSG00000010751(Tnfrsf22),ENSMUSG00000017146(Brca1),ENSMUSG00000017550(Atad5),ENSMUSG00000018983(E2f2),ENSMUSG00000019966(Kitl),ENSMUSG00000020190(Mknk2),ENSMUSG00000021…
BP	GO:0032635	interleukin-6 production	45	21	66	152	2.40149e-13	1.10787e-11	ENSMUSG00000001123(Lgals9),ENSMUSG00000002897(Il17ra),ENSMUSG00000004040(Stat3),ENSMUSG00000004266(Ptpn6),ENSMUSG00000008496(Pou2f2),ENSMUSG00000015316(Slamf1),ENSMUSG00000016528(Mapkapk2),ENSMUSG00000016529(Il10),ENSMUSG00000018500(Adora2b),ENSMUSG00000019850(Tnfaip3),ENSMUSG00000020227(Irak3),ENSMUSG00000020826(Nos2),ENSMUSG00000021457(Syk),ENSMUSG00000022749(Tbc1d23),ENSMUSG00000022892(App),EN…	ENSMUSG00000001741(Il16),ENSMUSG00000010047(Hyal2),ENSMUSG00000014158(Trpv4),ENSMUSG00000020399(Havcr2),ENSMUSG00000022667(Cd200r1),ENSMUSG00000022708(Zbtb20),ENSMUSG00000026288(Inpp5d),ENSMUSG00000027843(Ptpn22),ENSMUSG00000027947(Il6ra),ENSMUSG00000028864(Hgf),ENSMUSG00000029468(P2rx7),ENSMUSG00000031451(Gas6),ENSMUSG00000032109(Nlrx1),ENSMUSG00000034610(Tut4),ENSMUSG00000039005(Tlr4),ENSMUSG00…
CC	GO:0015630	microtubule cytoskeleton	128	204	332	1289	2.42634e-13	1.11604e-11	ENSMUSG00000000409(Lck),ENSMUSG00000000628(Hk2),ENSMUSG00000001175(Calm1),ENSMUSG00000001416(Cct3),ENSMUSG00000001473(Tubb6),ENSMUSG00000002812(Flii),ENSMUSG00000002983(Relb),ENSMUSG00000002997(Prkar2b),ENSMUSG00000004221(Ikbkg),ENSMUSG00000004591(Pkn2),ENSMUSG00000004936(Map2k1),ENSMUSG00000005732(Ranbp1),ENSMUSG00000006740(Kif5b),ENSMUSG00000009630(Ppp2cb),ENSMUSG00000015839(Nfe2l2),ENSMUSG0000…	ENSMUSG00000000028(Cdc45),ENSMUSG00000002031(Ift46),ENSMUSG00000002055(Spag5),ENSMUSG00000002068(Ccne1),ENSMUSG00000002104(Rapsn),ENSMUSG00000002486(Tchp),ENSMUSG00000002870(Mcm2),ENSMUSG00000003282(Plag1),ENSMUSG00000003452(Bicd1),ENSMUSG00000003546(Klc4),ENSMUSG00000004187(Kifc2),ENSMUSG00000004462(Tbccd1),ENSMUSG00000004768(Rab23),ENSMUSG00000005699(Pard6a),ENSMUSG00000006464(Bbs1),ENSMUSG0000…
BP	GO:0051234	establishment of localization	491	481	972	4488	2.5043e-13	1.14852e-11	ENSMUSG00000000385(Tmprss2),ENSMUSG00000000409(Lck),ENSMUSG00000000441(Raf1),ENSMUSG00000000628(Hk2),ENSMUSG00000000915(Hip1r),ENSMUSG00000000982(Ccl3),ENSMUSG00000001052(Sec24b),ENSMUSG00000001123(Lgals9),ENSMUSG00000001175(Calm1),ENSMUSG00000001248(Gramd1a),ENSMUSG00000001300(Efnb2),ENSMUSG00000001416(Cct3),ENSMUSG00000001440(Kpnb1),ENSMUSG00000001467(Cyp51),ENSMUSG00000002105(Slc39a13),ENSMUSG…	ENSMUSG00000000326(Comt),ENSMUSG00000000440(Pparg),ENSMUSG00000000631(Myo18a),ENSMUSG00000000693(Loxl3),ENSMUSG00000000869(Il4),ENSMUSG00000001138(Cnnm3),ENSMUSG00000001143(Lman2l),ENSMUSG00000001552(Jup),ENSMUSG00000001741(Il16),ENSMUSG00000001761(Smo),ENSMUSG00000002031(Ift46),ENSMUSG00000002055(Spag5),ENSMUSG00000002083(Bbc3),ENSMUSG00000002104(Rapsn),ENSMUSG00000002346(Slc25a42),ENSMUSG000000…
BP	GO:0010557	positive regulation of macromolecule biosynthetic process	246	204	450	1851	2.67836e-13	1.22476e-11	ENSMUSG00000000078(Klf6),ENSMUSG00000000275(Trim25),ENSMUSG00000000441(Raf1),ENSMUSG00000000532(Acvr1b),ENSMUSG00000000982(Ccl3),ENSMUSG00000001288(Rarg),ENSMUSG00000001416(Cct3),ENSMUSG00000001542(Ell2),ENSMUSG00000001627(Ifrd1),ENSMUSG00000001632(Brpf1),ENSMUSG00000001785(Pwp1),ENSMUSG00000002111(Spi1),ENSMUSG00000002307(Daxx),ENSMUSG00000002658(Gtf2f1),ENSMUSG00000002983(Relb),ENSMUSG000000040…	ENSMUSG00000000440(Pparg),ENSMUSG00000000869(Il4),ENSMUSG00000001552(Jup),ENSMUSG00000001761(Smo),ENSMUSG00000002409(Dyrk1b),ENSMUSG00000003282(Plag1),ENSMUSG00000003575(Crtc1),ENSMUSG00000003992(Ssbp2),ENSMUSG00000004151(Etv1),ENSMUSG00000005102(Eif2ak4),ENSMUSG00000005583(Mef2c),ENSMUSG00000005718(Tfap4),ENSMUSG00000005893(Nr2c2),ENSMUSG00000006288(Ttc5),ENSMUSG00000008855(Hdac5),ENSMUSG0000001…
BP	GO:0022607	cellular component assembly	310	311	621	2694	2.73246e-13	1.24586e-11	ENSMUSG00000000441(Raf1),ENSMUSG00000000555(Itga5),ENSMUSG00000000915(Hip1r),ENSMUSG00000000957(Mmp14),ENSMUSG00000001098(Kctd10),ENSMUSG00000001300(Efnb2),ENSMUSG00000001416(Cct3),ENSMUSG00000001440(Kpnb1),ENSMUSG00000002233(Rhoc),ENSMUSG00000002307(Daxx),ENSMUSG00000002413(Braf),ENSMUSG00000002477(Snrpd1),ENSMUSG00000002812(Flii),ENSMUSG00000002845(Tmem39a),ENSMUSG00000003208(Yju2),ENSMUSG00000…	ENSMUSG00000000028(Cdc45),ENSMUSG00000001482(Def8),ENSMUSG00000001552(Jup),ENSMUSG00000002031(Ift46),ENSMUSG00000002055(Spag5),ENSMUSG00000002083(Bbc3),ENSMUSG00000002107(Celf2),ENSMUSG00000002486(Tchp),ENSMUSG00000002835(Chaf1a),ENSMUSG00000002870(Mcm2),ENSMUSG00000003452(Bicd1),ENSMUSG00000003518(Dusp3),ENSMUSG00000003575(Crtc1),ENSMUSG00000004099(Dnmt1),ENSMUSG00000004530(Coro1c),ENSMUSG000000…
BP	GO:0046634	regulation of alpha-beta T cell activation	32	16	48	94	2.82101e-13	1.28249e-11	ENSMUSG00000001123(Lgals9),ENSMUSG00000004296(Il12b),ENSMUSG00000004709(Cd244a),ENSMUSG00000015396(Cd83),ENSMUSG00000016496(Cd274),ENSMUSG00000018899(Irf1),ENSMUSG00000019982(Myb),ENSMUSG00000020178(Adora2a),ENSMUSG00000021457(Syk),ENSMUSG00000025383(Il23a),ENSMUSG00000025746(Il6),ENSMUSG00000026395(Ptprc),ENSMUSG00000026700(Tnfsf4),ENSMUSG00000027776(Il12a),ENSMUSG00000031304(Il2rg),ENSMUSG00000…	ENSMUSG00000000693(Loxl3),ENSMUSG00000000869(Il4),ENSMUSG00000006611(Hfe),ENSMUSG00000017697(Ada),ENSMUSG00000020101(Vsir),ENSMUSG00000025880(Smad7),ENSMUSG00000026012(Cd28),ENSMUSG00000027843(Ptpn22),ENSMUSG00000030528(Blm),ENSMUSG00000031101(Sash3),ENSMUSG00000032440(Tgfbr2),ENSMUSG00000034652(Cd300a),ENSMUSG00000044813(Shb),ENSMUSG00000049103(Ccr2),ENSMUSG00000052142(Rasal3),ENSMUSG00000066687…
BP	GO:0051090	regulation of DNA-binding transcription factor activity	91	39	130	395	3.3154e-13	1.50288e-11	ENSMUSG00000000275(Trim25),ENSMUSG00000001627(Ifrd1),ENSMUSG00000003283(Hck),ENSMUSG00000004040(Stat3),ENSMUSG00000004221(Ikbkg),ENSMUSG00000005413(Hmox1),ENSMUSG00000007655(Cav1),ENSMUSG00000015605(Srf),ENSMUSG00000016529(Il10),ENSMUSG00000017652(Cd40),ENSMUSG00000019782(Rwdd1),ENSMUSG00000019850(Tnfaip3),ENSMUSG00000020134(Peli1),ENSMUSG00000020227(Irak3),ENSMUSG00000021024(Psma6),ENSMUSG000000…	ENSMUSG00000000440(Pparg),ENSMUSG00000000869(Il4),ENSMUSG00000001552(Jup),ENSMUSG00000001761(Smo),ENSMUSG00000003575(Crtc1),ENSMUSG00000005102(Eif2ak4),ENSMUSG00000008855(Hdac5),ENSMUSG00000013483(Card14),ENSMUSG00000015968(Cacna1d),ENSMUSG00000018669(Cdk5rap3),ENSMUSG00000019768(Esr1),ENSMUSG00000020399(Havcr2),ENSMUSG00000020888(Dvl2),ENSMUSG00000023755(Rhebl1),ENSMUSG00000024042(Sik1),ENSMUSG0…
CC	GO:0097708	intracellular vesicle	258	203	461	1909	3.38177e-13	1.52854e-11	ENSMUSG00000000409(Lck),ENSMUSG00000000555(Itga5),ENSMUSG00000000915(Hip1r),ENSMUSG00000000957(Mmp14),ENSMUSG00000001052(Sec24b),ENSMUSG00000001175(Calm1),ENSMUSG00000001248(Gramd1a),ENSMUSG00000002103(Acp2),ENSMUSG00000002233(Rhoc),ENSMUSG00000002847(Pla1a),ENSMUSG00000003283(Hck),ENSMUSG00000003863(Ppfia3),ENSMUSG00000003948(Mmd),ENSMUSG00000004296(Il12b),ENSMUSG00000004936(Map2k1),ENSMUSG00000…	ENSMUSG00000000631(Myo18a),ENSMUSG00000001053(N4bp3),ENSMUSG00000001143(Lman2l),ENSMUSG00000001228(Uhrf1),ENSMUSG00000001761(Smo),ENSMUSG00000001865(Cpa3),ENSMUSG00000002910(Arrdc2),ENSMUSG00000003153(Slc2a3),ENSMUSG00000003452(Bicd1),ENSMUSG00000004071(Cdip1),ENSMUSG00000004530(Coro1c),ENSMUSG00000004768(Rab23),ENSMUSG00000004798(Ulk2),ENSMUSG00000005949(Ctns),ENSMUSG00000006611(Hfe),ENSMUSG0000…
BP	GO:1901342	regulation of vasculature development	72	46	118	347	3.40567e-13	1.53491e-11	ENSMUSG00000000555(Itga5),ENSMUSG00000000628(Hk2),ENSMUSG00000001300(Efnb2),ENSMUSG00000004040(Stat3),ENSMUSG00000004296(Il12b),ENSMUSG00000005413(Hmox1),ENSMUSG00000006818(Sod2),ENSMUSG00000014773(Dll1),ENSMUSG00000015340(Cybb),ENSMUSG00000015839(Nfe2l2),ENSMUSG00000016529(Il10),ENSMUSG00000017652(Cd40),ENSMUSG00000017737(Mmp9),ENSMUSG00000020580(Rock2),ENSMUSG00000021109(Hif1a),ENSMUSG000000215…	ENSMUSG00000000440(Pparg),ENSMUSG00000001552(Jup),ENSMUSG00000004099(Dnmt1),ENSMUSG00000004698(Hdac9),ENSMUSG00000008855(Hdac5),ENSMUSG00000010051(Hyal1),ENSMUSG00000016933(Plcg1),ENSMUSG00000017146(Brca1),ENSMUSG00000018983(E2f2),ENSMUSG00000020689(Itgb3),ENSMUSG00000022114(Spry2),ENSMUSG00000022469(Rapgef3),ENSMUSG00000023031(Cela1),ENSMUSG00000023905(Tnfrsf12a),ENSMUSG00000024962(Vegfb),ENSMUS…
BP	GO:0045621	positive regulation of lymphocyte differentiation	36	17	53	110	3.45381e-13	1.55213e-11	ENSMUSG00000000409(Lck),ENSMUSG00000000957(Mmp14),ENSMUSG00000001123(Lgals9),ENSMUSG00000002602(Axl),ENSMUSG00000004043(Stat5a),ENSMUSG00000015396(Cd83),ENSMUSG00000016529(Il10),ENSMUSG00000018899(Irf1),ENSMUSG00000019982(Myb),ENSMUSG00000021270(Hsp90aa1),ENSMUSG00000021457(Syk),ENSMUSG00000023206(Il15ra),ENSMUSG00000025383(Il23a),ENSMUSG00000025746(Il6),ENSMUSG00000026395(Ptprc),ENSMUSG000000267…	ENSMUSG00000000869(Il4),ENSMUSG00000003882(Il7r),ENSMUSG00000017697(Ada),ENSMUSG00000020101(Vsir),ENSMUSG00000022672(Prkdc),ENSMUSG00000026288(Inpp5d),ENSMUSG00000027239(Mdk),ENSMUSG00000029204(Rhoh),ENSMUSG00000031101(Sash3),ENSMUSG00000031451(Gas6),ENSMUSG00000032440(Tgfbr2),ENSMUSG00000039384(Dusp10),ENSMUSG00000044813(Shb),ENSMUSG00000049103(Ccr2),ENSMUSG00000051817(Sox12),ENSMUSG00000066687(…
BP	GO:0033674	positive regulation of kinase activity	98	69	167	549	3.56061e-13	1.59554e-11	ENSMUSG00000000184(Ccnd2),ENSMUSG00000000441(Raf1),ENSMUSG00000001123(Lgals9),ENSMUSG00000002307(Daxx),ENSMUSG00000002413(Braf),ENSMUSG00000002602(Axl),ENSMUSG00000002699(Lcp2),ENSMUSG00000003948(Mmd),ENSMUSG00000004221(Ikbkg),ENSMUSG00000004296(Il12b),ENSMUSG00000004936(Map2k1),ENSMUSG00000006262(Mob1b),ENSMUSG00000012519(Mlkl),ENSMUSG00000014599(Csf1),ENSMUSG00000015312(Gadd45b),ENSMUSG00000015…	ENSMUSG00000000869(Il4),ENSMUSG00000000881(Dlg3),ENSMUSG00000005583(Mef2c),ENSMUSG00000005958(Ephb3),ENSMUSG00000014361(Mertk),ENSMUSG00000014426(Map3k4),ENSMUSG00000016984(Etaa1),ENSMUSG00000019966(Kitl),ENSMUSG00000020189(Osbpl8),ENSMUSG00000020312(Shc2),ENSMUSG00000020541(Tom1l1),ENSMUSG00000020623(Map2k6),ENSMUSG00000020689(Itgb3),ENSMUSG00000020888(Dvl2),ENSMUSG00000021253(Tgfb3),ENSMUSG0000…
MF	GO:0042578	phosphoric ester hydrolase activity	50	68	118	348	4.95652e-13	2.21472e-11	ENSMUSG00000000409(Lck),ENSMUSG00000001348(Acp5),ENSMUSG00000002103(Acp2),ENSMUSG00000004266(Ptpn6),ENSMUSG00000005413(Hmox1),ENSMUSG00000009630(Ppp2cb),ENSMUSG00000014956(Ppp1cb),ENSMUSG00000018559(Ctdnep1),ENSMUSG00000020349(Ppp2ca),ENSMUSG00000021759(Plpp1),ENSMUSG00000022092(Ppp3cc),ENSMUSG00000023087(Noct),ENSMUSG00000023467(Tulp2),ENSMUSG00000023868(Pde10a),ENSMUSG00000024539(Ptpn2),ENSMUSG…	ENSMUSG00000002329(Mdp1),ENSMUSG00000003518(Dusp3),ENSMUSG00000004347(Pde1c),ENSMUSG00000010461(Eya4),ENSMUSG00000015711(Prune1),ENSMUSG00000016933(Plcg1),ENSMUSG00000019822(Smpd2),ENSMUSG00000019960(Dusp6),ENSMUSG00000019990(Pde7b),ENSMUSG00000020593(Lpin1),ENSMUSG00000020937(Plcd3),ENSMUSG00000021009(Ptpn21),ENSMUSG00000021054(Sgpp1),ENSMUSG00000021177(Tdp1),ENSMUSG00000021699(Pde4d),ENSMUSG000…
CC	GO:0031410	cytoplasmic vesicle	258	201	459	1904	5.12415e-13	2.28309e-11	ENSMUSG00000000409(Lck),ENSMUSG00000000555(Itga5),ENSMUSG00000000915(Hip1r),ENSMUSG00000000957(Mmp14),ENSMUSG00000001052(Sec24b),ENSMUSG00000001175(Calm1),ENSMUSG00000001248(Gramd1a),ENSMUSG00000002103(Acp2),ENSMUSG00000002233(Rhoc),ENSMUSG00000002847(Pla1a),ENSMUSG00000003283(Hck),ENSMUSG00000003863(Ppfia3),ENSMUSG00000003948(Mmd),ENSMUSG00000004296(Il12b),ENSMUSG00000004936(Map2k1),ENSMUSG00000…	ENSMUSG00000000631(Myo18a),ENSMUSG00000001053(N4bp3),ENSMUSG00000001143(Lman2l),ENSMUSG00000001228(Uhrf1),ENSMUSG00000001761(Smo),ENSMUSG00000001865(Cpa3),ENSMUSG00000002910(Arrdc2),ENSMUSG00000003153(Slc2a3),ENSMUSG00000003452(Bicd1),ENSMUSG00000004071(Cdip1),ENSMUSG00000004530(Coro1c),ENSMUSG00000004768(Rab23),ENSMUSG00000004798(Ulk2),ENSMUSG00000005949(Ctns),ENSMUSG00000006611(Hfe),ENSMUSG0000…
BP	GO:0045860	positive regulation of protein kinase activity	90	61	151	484	5.43898e-13	2.41648e-11	ENSMUSG00000000184(Ccnd2),ENSMUSG00000000441(Raf1),ENSMUSG00000001123(Lgals9),ENSMUSG00000002307(Daxx),ENSMUSG00000002413(Braf),ENSMUSG00000002699(Lcp2),ENSMUSG00000003948(Mmd),ENSMUSG00000004221(Ikbkg),ENSMUSG00000004296(Il12b),ENSMUSG00000004936(Map2k1),ENSMUSG00000012519(Mlkl),ENSMUSG00000014599(Csf1),ENSMUSG00000015312(Gadd45b),ENSMUSG00000015755(Tab2),ENSMUSG00000015957(Wnt11),ENSMUSG0000001…	ENSMUSG00000000869(Il4),ENSMUSG00000000881(Dlg3),ENSMUSG00000005583(Mef2c),ENSMUSG00000014426(Map3k4),ENSMUSG00000016984(Etaa1),ENSMUSG00000019966(Kitl),ENSMUSG00000020189(Osbpl8),ENSMUSG00000020312(Shc2),ENSMUSG00000020541(Tom1l1),ENSMUSG00000020623(Map2k6),ENSMUSG00000020689(Itgb3),ENSMUSG00000020888(Dvl2),ENSMUSG00000021253(Tgfb3),ENSMUSG00000021453(Gadd45g),ENSMUSG00000022114(Spry2),ENSMUSG00…
BP	GO:0071356	cellular response to tumor necrosis factor	52	25	77	193	5.57062e-13	2.46796e-11	ENSMUSG00000000982(Ccl3),ENSMUSG00000015839(Nfe2l2),ENSMUSG00000017652(Cd40),ENSMUSG00000018899(Irf1),ENSMUSG00000018930(Ccl4),ENSMUSG00000019122(Ccl9),ENSMUSG00000020696(Rffl),ENSMUSG00000021025(Nfkbia),ENSMUSG00000021277(Traf3),ENSMUSG00000021367(Edn1),ENSMUSG00000021457(Syk),ENSMUSG00000024401(Tnf),ENSMUSG00000024539(Ptpn2),ENSMUSG00000024778(Fas),ENSMUSG00000024789(Jak2),ENSMUSG00000024812(Tj…	ENSMUSG00000004071(Cdip1),ENSMUSG00000010047(Hyal2),ENSMUSG00000010051(Hyal1),ENSMUSG00000013483(Card14),ENSMUSG00000017146(Brca1),ENSMUSG00000020889(Nr1d1),ENSMUSG00000021127(Zfp36l1),ENSMUSG00000022367(Has2),ENSMUSG00000023019(Gpd1),ENSMUSG00000023826(Prkn),ENSMUSG00000023915(Tnfrsf21),ENSMUSG00000028101(Pias3),ENSMUSG00000029821(Gsdme),ENSMUSG00000031451(Gas6),ENSMUSG00000032238(Rora),ENSMUSG0…
BP	GO:0030031	cell projection assembly	60	100	160	522	5.6175e-13	2.4817e-11	ENSMUSG00000007655(Cav1),ENSMUSG00000008892(Vdac3),ENSMUSG00000015605(Srf),ENSMUSG00000018736(Ndel1),ENSMUSG00000020024(Cep83),ENSMUSG00000020476(Dbnl),ENSMUSG00000020900(Myh10),ENSMUSG00000021270(Hsp90aa1),ENSMUSG00000021823(Vcl),ENSMUSG00000021948(Prkcd),ENSMUSG00000022200(Golph3),ENSMUSG00000022272(Myo10),ENSMUSG00000022377(Asap1),ENSMUSG00000024143(Rhoq),ENSMUSG00000024290(Rock1),ENSMUSG00000…	ENSMUSG00000001482(Def8),ENSMUSG00000002031(Ift46),ENSMUSG00000002486(Tchp),ENSMUSG00000004530(Coro1c),ENSMUSG00000004768(Rab23),ENSMUSG00000006464(Bbs1),ENSMUSG00000012609(Ttll5),ENSMUSG00000015766(Eps8),ENSMUSG00000018199(Ro60),ENSMUSG00000018395(Kif3a),ENSMUSG00000019952(Poc1b),ENSMUSG00000020308(Tpgs1),ENSMUSG00000020319(Wdpcp),ENSMUSG00000020669(Sh3yl1),ENSMUSG00000020895(Tmem107),ENSMUSG000…
BP	GO:0051252	regulation of RNA metabolic process	430	381	811	3669	5.94394e-13	2.61852e-11	ENSMUSG00000000078(Klf6),ENSMUSG00000000275(Trim25),ENSMUSG00000000317(Bcl6b),ENSMUSG00000000441(Raf1),ENSMUSG00000000532(Acvr1b),ENSMUSG00000000730(Dnmt3l),ENSMUSG00000000982(Ccl3),ENSMUSG00000001288(Rarg),ENSMUSG00000001542(Ell2),ENSMUSG00000001627(Ifrd1),ENSMUSG00000001632(Brpf1),ENSMUSG00000001785(Pwp1),ENSMUSG00000002111(Spi1),ENSMUSG00000002227(Mov10),ENSMUSG00000002307(Daxx),ENSMUSG0000000…	ENSMUSG00000000028(Cdc45),ENSMUSG00000000037(Scml2),ENSMUSG00000000282(Mnt),ENSMUSG00000000440(Pparg),ENSMUSG00000000693(Loxl3),ENSMUSG00000000869(Il4),ENSMUSG00000001228(Uhrf1),ENSMUSG00000001552(Jup),ENSMUSG00000001761(Smo),ENSMUSG00000002068(Ccne1),ENSMUSG00000002107(Celf2),ENSMUSG00000002409(Dyrk1b),ENSMUSG00000002486(Tchp),ENSMUSG00000003282(Plag1),ENSMUSG00000003575(Crtc1),ENSMUSG0000000399…
MF	GO:0043169	cation binding	428	473	901	4126	6.00377e-13	2.63744e-11	ENSMUSG00000000275(Trim25),ENSMUSG00000000317(Bcl6b),ENSMUSG00000000441(Raf1),ENSMUSG00000000532(Acvr1b),ENSMUSG00000000555(Itga5),ENSMUSG00000000730(Dnmt3l),ENSMUSG00000000957(Mmp14),ENSMUSG00000001052(Sec24b),ENSMUSG00000001175(Calm1),ENSMUSG00000001288(Rarg),ENSMUSG00000001348(Acp5),ENSMUSG00000001435(Col18a1),ENSMUSG00000001467(Cyp51),ENSMUSG00000001630(Stk38l),ENSMUSG00000001632(Brpf1),ENSMU…	ENSMUSG00000000149(Gna12),ENSMUSG00000000253(Gmpr),ENSMUSG00000000326(Comt),ENSMUSG00000000440(Pparg),ENSMUSG00000000693(Loxl3),ENSMUSG00000000751(Rpa1),ENSMUSG00000001054(Rmnd5b),ENSMUSG00000001143(Lman2l),ENSMUSG00000001228(Uhrf1),ENSMUSG00000001482(Def8),ENSMUSG00000001865(Cpa3),ENSMUSG00000002104(Rapsn),ENSMUSG00000002329(Mdp1),ENSMUSG00000002732(Fkbp7),ENSMUSG00000002870(Mcm2),ENSMUSG0000000…
MF	GO:0016740	transferase activity	293	248	541	2303	6.63332e-13	2.90584e-11	ENSMUSG00000000275(Trim25),ENSMUSG00000000409(Lck),ENSMUSG00000000441(Raf1),ENSMUSG00000000532(Acvr1b),ENSMUSG00000000628(Hk2),ENSMUSG00000000730(Dnmt3l),ENSMUSG00000000776(Polr3d),ENSMUSG00000000982(Ccl3),ENSMUSG00000001098(Kctd10),ENSMUSG00000001630(Stk38l),ENSMUSG00000001632(Brpf1),ENSMUSG00000001663(Gstt1),ENSMUSG00000002413(Braf),ENSMUSG00000002602(Axl),ENSMUSG00000003283(Hck),ENSMUSG0000000…	ENSMUSG00000000326(Comt),ENSMUSG00000001054(Rmnd5b),ENSMUSG00000001228(Uhrf1),ENSMUSG00000001665(Gstt3),ENSMUSG00000001755(Coasy),ENSMUSG00000002068(Ccne1),ENSMUSG00000002109(Ddb2),ENSMUSG00000002409(Dyrk1b),ENSMUSG00000003623(Crot),ENSMUSG00000004099(Dnmt1),ENSMUSG00000004561(Mettl17),ENSMUSG00000004798(Ulk2),ENSMUSG00000004933(Matk),ENSMUSG00000005102(Eif2ak4),ENSMUSG00000005198(Polr2a),ENSMUSG…
MF	GO:0042802	identical protein binding	292	214	506	2132	7.38104e-13	3.22436e-11	ENSMUSG00000000409(Lck),ENSMUSG00000000441(Raf1),ENSMUSG00000000732(Icosl),ENSMUSG00000000915(Hip1r),ENSMUSG00000001098(Kctd10),ENSMUSG00000001435(Col18a1),ENSMUSG00000002105(Slc39a13),ENSMUSG00000002413(Braf),ENSMUSG00000002983(Relb),ENSMUSG00000003665(Has1),ENSMUSG00000003849(Nqo1),ENSMUSG00000004040(Stat3),ENSMUSG00000004044(Cavin1),ENSMUSG00000004221(Ikbkg),ENSMUSG00000004296(Il12b),ENSMUSG00…	ENSMUSG00000000440(Pparg),ENSMUSG00000001228(Uhrf1),ENSMUSG00000002289(Angptl4),ENSMUSG00000002731(Prkra),ENSMUSG00000002835(Chaf1a),ENSMUSG00000003378(Grik5),ENSMUSG00000004996(Mri1),ENSMUSG00000005447(Pafah1b3),ENSMUSG00000005615(Pcyt1a),ENSMUSG00000005718(Tfap4),ENSMUSG00000006235(Epor),ENSMUSG00000008305(Tle1),ENSMUSG00000008855(Hdac5),ENSMUSG00000011148(Adssl1),ENSMUSG00000014158(Trpv4),ENSM…
BP	GO:0050670	regulation of lymphocyte proliferation	56	27	83	216	7.92066e-13	3.45045e-11	ENSMUSG00000000732(Icosl),ENSMUSG00000001123(Lgals9),ENSMUSG00000004043(Stat5a),ENSMUSG00000004266(Ptpn6),ENSMUSG00000004296(Il12b),ENSMUSG00000004709(Cd244a),ENSMUSG00000015316(Slamf1),ENSMUSG00000016496(Cd274),ENSMUSG00000016529(Il10),ENSMUSG00000017009(Sdc4),ENSMUSG00000017652(Cd40),ENSMUSG00000018899(Irf1),ENSMUSG00000020134(Peli1),ENSMUSG00000021457(Syk),ENSMUSG00000022901(Cd86),ENSMUSG00000…	ENSMUSG00000000869(Il4),ENSMUSG00000005583(Mef2c),ENSMUSG00000017550(Atad5),ENSMUSG00000017697(Ada),ENSMUSG00000020101(Vsir),ENSMUSG00000020399(Havcr2),ENSMUSG00000021756(Il6st),ENSMUSG00000023915(Tnfrsf21),ENSMUSG00000026012(Cd28),ENSMUSG00000026288(Inpp5d),ENSMUSG00000027544(Nfatc2),ENSMUSG00000027843(Ptpn22),ENSMUSG00000030365(Clec2i),ENSMUSG00000030528(Blm),ENSMUSG00000031101(Sash3),ENSMUSG00…
BP	GO:2001141	regulation of RNA biosynthetic process	394	366	760	3413	8.34883e-13	3.62687e-11	ENSMUSG00000000078(Klf6),ENSMUSG00000000275(Trim25),ENSMUSG00000000317(Bcl6b),ENSMUSG00000000441(Raf1),ENSMUSG00000000532(Acvr1b),ENSMUSG00000000730(Dnmt3l),ENSMUSG00000000982(Ccl3),ENSMUSG00000001288(Rarg),ENSMUSG00000001542(Ell2),ENSMUSG00000001627(Ifrd1),ENSMUSG00000001632(Brpf1),ENSMUSG00000001785(Pwp1),ENSMUSG00000002111(Spi1),ENSMUSG00000002307(Daxx),ENSMUSG00000002325(Irf9),ENSMUSG00000002…	ENSMUSG00000000028(Cdc45),ENSMUSG00000000037(Scml2),ENSMUSG00000000282(Mnt),ENSMUSG00000000440(Pparg),ENSMUSG00000000693(Loxl3),ENSMUSG00000000869(Il4),ENSMUSG00000001228(Uhrf1),ENSMUSG00000001552(Jup),ENSMUSG00000001761(Smo),ENSMUSG00000002068(Ccne1),ENSMUSG00000002409(Dyrk1b),ENSMUSG00000002486(Tchp),ENSMUSG00000003282(Plag1),ENSMUSG00000003575(Crtc1),ENSMUSG00000003992(Ssbp2),ENSMUSG0000000409…
BP	GO:0006355	regulation of transcription, DNA-templated	393	366	759	3408	8.40876e-13	3.64279e-11	ENSMUSG00000000078(Klf6),ENSMUSG00000000275(Trim25),ENSMUSG00000000317(Bcl6b),ENSMUSG00000000441(Raf1),ENSMUSG00000000532(Acvr1b),ENSMUSG00000000730(Dnmt3l),ENSMUSG00000000982(Ccl3),ENSMUSG00000001288(Rarg),ENSMUSG00000001542(Ell2),ENSMUSG00000001627(Ifrd1),ENSMUSG00000001632(Brpf1),ENSMUSG00000001785(Pwp1),ENSMUSG00000002111(Spi1),ENSMUSG00000002307(Daxx),ENSMUSG00000002325(Irf9),ENSMUSG00000002…	ENSMUSG00000000028(Cdc45),ENSMUSG00000000037(Scml2),ENSMUSG00000000282(Mnt),ENSMUSG00000000440(Pparg),ENSMUSG00000000693(Loxl3),ENSMUSG00000000869(Il4),ENSMUSG00000001228(Uhrf1),ENSMUSG00000001552(Jup),ENSMUSG00000001761(Smo),ENSMUSG00000002068(Ccne1),ENSMUSG00000002409(Dyrk1b),ENSMUSG00000002486(Tchp),ENSMUSG00000003282(Plag1),ENSMUSG00000003575(Crtc1),ENSMUSG00000003992(Ssbp2),ENSMUSG0000000409…
BP	GO:1903506	regulation of nucleic acid-templated transcription	393	366	759	3409	8.98129e-13	3.88007e-11	ENSMUSG00000000078(Klf6),ENSMUSG00000000275(Trim25),ENSMUSG00000000317(Bcl6b),ENSMUSG00000000441(Raf1),ENSMUSG00000000532(Acvr1b),ENSMUSG00000000730(Dnmt3l),ENSMUSG00000000982(Ccl3),ENSMUSG00000001288(Rarg),ENSMUSG00000001542(Ell2),ENSMUSG00000001627(Ifrd1),ENSMUSG00000001632(Brpf1),ENSMUSG00000001785(Pwp1),ENSMUSG00000002111(Spi1),ENSMUSG00000002307(Daxx),ENSMUSG00000002325(Irf9),ENSMUSG00000002…	ENSMUSG00000000028(Cdc45),ENSMUSG00000000037(Scml2),ENSMUSG00000000282(Mnt),ENSMUSG00000000440(Pparg),ENSMUSG00000000693(Loxl3),ENSMUSG00000000869(Il4),ENSMUSG00000001228(Uhrf1),ENSMUSG00000001552(Jup),ENSMUSG00000001761(Smo),ENSMUSG00000002068(Ccne1),ENSMUSG00000002409(Dyrk1b),ENSMUSG00000002486(Tchp),ENSMUSG00000003282(Plag1),ENSMUSG00000003575(Crtc1),ENSMUSG00000003992(Ssbp2),ENSMUSG0000000409…
BP	GO:0045765	regulation of angiogenesis	67	41	108	312	9.48383e-13	4.08589e-11	ENSMUSG00000000555(Itga5),ENSMUSG00000000628(Hk2),ENSMUSG00000004040(Stat3),ENSMUSG00000004296(Il12b),ENSMUSG00000005413(Hmox1),ENSMUSG00000014773(Dll1),ENSMUSG00000015340(Cybb),ENSMUSG00000015839(Nfe2l2),ENSMUSG00000016529(Il10),ENSMUSG00000017652(Cd40),ENSMUSG00000017737(Mmp9),ENSMUSG00000020580(Rock2),ENSMUSG00000021109(Hif1a),ENSMUSG00000021583(Erap1),ENSMUSG00000021701(Plk2),ENSMUSG000000222…	ENSMUSG00000000440(Pparg),ENSMUSG00000001552(Jup),ENSMUSG00000004698(Hdac9),ENSMUSG00000008855(Hdac5),ENSMUSG00000010051(Hyal1),ENSMUSG00000016933(Plcg1),ENSMUSG00000017146(Brca1),ENSMUSG00000018983(E2f2),ENSMUSG00000020689(Itgb3),ENSMUSG00000022114(Spry2),ENSMUSG00000022469(Rapgef3),ENSMUSG00000023031(Cela1),ENSMUSG00000023905(Tnfrsf12a),ENSMUSG00000024962(Vegfb),ENSMUSG00000024986(Hhex),ENSMUSG…
BP	GO:0050671	positive regulation of lymphocyte proliferation	38	20	58	129	1.1181e-12	4.80382e-11	ENSMUSG00000000732(Icosl),ENSMUSG00000004043(Stat5a),ENSMUSG00000004296(Il12b),ENSMUSG00000004709(Cd244a),ENSMUSG00000015316(Slamf1),ENSMUSG00000016496(Cd274),ENSMUSG00000017652(Cd40),ENSMUSG00000020134(Peli1),ENSMUSG00000021457(Syk),ENSMUSG00000022901(Cd86),ENSMUSG00000023067(Cdkn1a),ENSMUSG00000025383(Il23a),ENSMUSG00000025746(Il6),ENSMUSG00000026395(Ptprc),ENSMUSG00000026700(Tnfsf4),ENSMUSG000…	ENSMUSG00000000869(Il4),ENSMUSG00000005583(Mef2c),ENSMUSG00000017550(Atad5),ENSMUSG00000017697(Ada),ENSMUSG00000020399(Havcr2),ENSMUSG00000021756(Il6st),ENSMUSG00000026012(Cd28),ENSMUSG00000027544(Nfatc2),ENSMUSG00000027843(Ptpn22),ENSMUSG00000030528(Blm),ENSMUSG00000031101(Sash3),ENSMUSG00000031217(Efnb1),ENSMUSG00000031497(Tnfsf13b),ENSMUSG00000032440(Tgfbr2),ENSMUSG00000036526(Card11),ENSMUSG0…
BP	GO:0070663	regulation of leukocyte proliferation	58	30	88	236	1.18117e-12	5.0609e-11	ENSMUSG00000000732(Icosl),ENSMUSG00000001123(Lgals9),ENSMUSG00000004043(Stat5a),ENSMUSG00000004266(Ptpn6),ENSMUSG00000004296(Il12b),ENSMUSG00000004709(Cd244a),ENSMUSG00000014599(Csf1),ENSMUSG00000015316(Slamf1),ENSMUSG00000016496(Cd274),ENSMUSG00000016529(Il10),ENSMUSG00000017009(Sdc4),ENSMUSG00000017652(Cd40),ENSMUSG00000018899(Irf1),ENSMUSG00000020134(Peli1),ENSMUSG00000021457(Syk),ENSMUSG00000…	ENSMUSG00000000869(Il4),ENSMUSG00000005583(Mef2c),ENSMUSG00000017550(Atad5),ENSMUSG00000017697(Ada),ENSMUSG00000019966(Kitl),ENSMUSG00000020101(Vsir),ENSMUSG00000020399(Havcr2),ENSMUSG00000021756(Il6st),ENSMUSG00000022885(St6gal1),ENSMUSG00000023915(Tnfrsf21),ENSMUSG00000024986(Hhex),ENSMUSG00000026012(Cd28),ENSMUSG00000026288(Inpp5d),ENSMUSG00000027544(Nfatc2),ENSMUSG00000027843(Ptpn22),ENSMUSG0…
BP	GO:0008104	protein localization	294	288	582	2519	1.21386e-12	5.18675e-11	ENSMUSG00000000275(Trim25),ENSMUSG00000000441(Raf1),ENSMUSG00000000628(Hk2),ENSMUSG00000000957(Mmp14),ENSMUSG00000001052(Sec24b),ENSMUSG00000001123(Lgals9),ENSMUSG00000001175(Calm1),ENSMUSG00000001300(Efnb2),ENSMUSG00000001416(Cct3),ENSMUSG00000001440(Kpnb1),ENSMUSG00000001467(Cyp51),ENSMUSG00000002413(Braf),ENSMUSG00000003352(Cacnb3),ENSMUSG00000003948(Mmd),ENSMUSG00000004040(Stat3),ENSMUSG00000…	ENSMUSG00000000037(Scml2),ENSMUSG00000000440(Pparg),ENSMUSG00000000631(Myo18a),ENSMUSG00000000751(Rpa1),ENSMUSG00000000881(Dlg3),ENSMUSG00000001143(Lman2l),ENSMUSG00000001552(Jup),ENSMUSG00000001761(Smo),ENSMUSG00000002031(Ift46),ENSMUSG00000002055(Spag5),ENSMUSG00000002068(Ccne1),ENSMUSG00000002083(Bbc3),ENSMUSG00000002104(Rapsn),ENSMUSG00000002910(Arrdc2),ENSMUSG00000003134(Tbc1d8),ENSMUSG00000…
BP	GO:0070665	positive regulation of leukocyte proliferation	40	22	62	143	1.36805e-12	5.82968e-11	ENSMUSG00000000732(Icosl),ENSMUSG00000004043(Stat5a),ENSMUSG00000004296(Il12b),ENSMUSG00000004709(Cd244a),ENSMUSG00000014599(Csf1),ENSMUSG00000015316(Slamf1),ENSMUSG00000016496(Cd274),ENSMUSG00000017652(Cd40),ENSMUSG00000020134(Peli1),ENSMUSG00000021457(Syk),ENSMUSG00000022901(Cd86),ENSMUSG00000023067(Cdkn1a),ENSMUSG00000025383(Il23a),ENSMUSG00000025746(Il6),ENSMUSG00000026395(Ptprc),ENSMUSG00000…	ENSMUSG00000000869(Il4),ENSMUSG00000005583(Mef2c),ENSMUSG00000017550(Atad5),ENSMUSG00000017697(Ada),ENSMUSG00000019966(Kitl),ENSMUSG00000020399(Havcr2),ENSMUSG00000021756(Il6st),ENSMUSG00000022885(St6gal1),ENSMUSG00000026012(Cd28),ENSMUSG00000027544(Nfatc2),ENSMUSG00000027843(Ptpn22),ENSMUSG00000030528(Blm),ENSMUSG00000031101(Sash3),ENSMUSG00000031217(Efnb1),ENSMUSG00000031497(Tnfsf13b),ENSMUSG00…
MF	GO:0008144	drug binding	208	207	415	1698	1.57028e-12	6.67328e-11	ENSMUSG00000000409(Lck),ENSMUSG00000000441(Raf1),ENSMUSG00000000532(Acvr1b),ENSMUSG00000000628(Hk2),ENSMUSG00000001416(Cct3),ENSMUSG00000001630(Stk38l),ENSMUSG00000002227(Mov10),ENSMUSG00000002413(Braf),ENSMUSG00000002602(Axl),ENSMUSG00000003283(Hck),ENSMUSG00000004591(Pkn2),ENSMUSG00000004936(Map2k1),ENSMUSG00000006740(Kif5b),ENSMUSG00000006818(Sod2),ENSMUSG00000009376(Met),ENSMUSG00000012519(Ml…	ENSMUSG00000000631(Myo18a),ENSMUSG00000001755(Coasy),ENSMUSG00000002409(Dyrk1b),ENSMUSG00000002870(Mcm2),ENSMUSG00000004187(Kifc2),ENSMUSG00000004561(Mettl17),ENSMUSG00000004798(Ulk2),ENSMUSG00000004933(Matk),ENSMUSG00000005102(Eif2ak4),ENSMUSG00000005370(Msh6),ENSMUSG00000005580(Adcy9),ENSMUSG00000005907(Pex1),ENSMUSG00000005951(Shpk),ENSMUSG00000005958(Ephb3),ENSMUSG00000007035(Msh5),ENSMUSG000…
BP	GO:0032774	RNA biosynthetic process	406	377	783	3543	1.84723e-12	7.82894e-11	ENSMUSG00000000078(Klf6),ENSMUSG00000000275(Trim25),ENSMUSG00000000317(Bcl6b),ENSMUSG00000000441(Raf1),ENSMUSG00000000532(Acvr1b),ENSMUSG00000000730(Dnmt3l),ENSMUSG00000000776(Polr3d),ENSMUSG00000000982(Ccl3),ENSMUSG00000001288(Rarg),ENSMUSG00000001542(Ell2),ENSMUSG00000001627(Ifrd1),ENSMUSG00000001632(Brpf1),ENSMUSG00000001785(Pwp1),ENSMUSG00000002111(Spi1),ENSMUSG00000002307(Daxx),ENSMUSG000000…	ENSMUSG00000000028(Cdc45),ENSMUSG00000000037(Scml2),ENSMUSG00000000282(Mnt),ENSMUSG00000000440(Pparg),ENSMUSG00000000693(Loxl3),ENSMUSG00000000869(Il4),ENSMUSG00000001228(Uhrf1),ENSMUSG00000001552(Jup),ENSMUSG00000001761(Smo),ENSMUSG00000002068(Ccne1),ENSMUSG00000002409(Dyrk1b),ENSMUSG00000002486(Tchp),ENSMUSG00000003282(Plag1),ENSMUSG00000003575(Crtc1),ENSMUSG00000003992(Ssbp2),ENSMUSG0000000409…
BP	GO:0009890	negative regulation of biosynthetic process	200	209	409	1675	1.99209e-12	8.42007e-11	ENSMUSG00000000317(Bcl6b),ENSMUSG00000000730(Dnmt3l),ENSMUSG00000000838(Fmr1),ENSMUSG00000001288(Rarg),ENSMUSG00000001348(Acp5),ENSMUSG00000002111(Spi1),ENSMUSG00000002227(Mov10),ENSMUSG00000002307(Daxx),ENSMUSG00000002881(Nab1),ENSMUSG00000002983(Relb),ENSMUSG00000004040(Stat3),ENSMUSG00000005774(Rfx5),ENSMUSG00000007655(Cav1),ENSMUSG00000013415(Igf2bp1),ENSMUSG00000015605(Srf),ENSMUSG0000001583…	ENSMUSG00000000028(Cdc45),ENSMUSG00000000037(Scml2),ENSMUSG00000000282(Mnt),ENSMUSG00000000440(Pparg),ENSMUSG00000000693(Loxl3),ENSMUSG00000000869(Il4),ENSMUSG00000001228(Uhrf1),ENSMUSG00000001761(Smo),ENSMUSG00000002068(Ccne1),ENSMUSG00000004099(Dnmt1),ENSMUSG00000004698(Hdac9),ENSMUSG00000005102(Eif2ak4),ENSMUSG00000005583(Mef2c),ENSMUSG00000005718(Tfap4),ENSMUSG00000005893(Nr2c2),ENSMUSG000000…
BP	GO:0060326	cell chemotaxis	80	24	104	300	2.24773e-12	9.47502e-11	ENSMUSG00000000982(Ccl3),ENSMUSG00000002897(Il17ra),ENSMUSG00000009376(Met),ENSMUSG00000014599(Csf1),ENSMUSG00000015316(Slamf1),ENSMUSG00000017776(Crk),ENSMUSG00000018920(Cxcl16),ENSMUSG00000018930(Ccl4),ENSMUSG00000019122(Ccl9),ENSMUSG00000021367(Edn1),ENSMUSG00000021457(Syk),ENSMUSG00000021948(Prkcd),ENSMUSG00000022122(Ednrb),ENSMUSG00000022892(App),ENSMUSG00000023034(Nr4a1),ENSMUSG00000023078(…	ENSMUSG00000000869(Il4),ENSMUSG00000001741(Il16),ENSMUSG00000014158(Trpv4),ENSMUSG00000017670(Elmo2),ENSMUSG00000021699(Pde4d),ENSMUSG00000024962(Vegfb),ENSMUSG00000026271(Gpr35),ENSMUSG00000027239(Mdk),ENSMUSG00000028864(Hgf),ENSMUSG00000028927(Padi2),ENSMUSG00000031385(Plxnb3),ENSMUSG00000031451(Gas6),ENSMUSG00000031565(Fgfr1),ENSMUSG00000031714(Gab1),ENSMUSG00000032754(Slc8b1),ENSMUSG000000450…
BP	GO:0048872	homeostasis of number of cells	65	43	108	316	2.37535e-12	9.98604e-11	ENSMUSG00000000532(Acvr1b),ENSMUSG00000002111(Spi1),ENSMUSG00000002602(Axl),ENSMUSG00000004040(Stat3),ENSMUSG00000004043(Stat5a),ENSMUSG00000004221(Ikbkg),ENSMUSG00000005057(Sh2b2),ENSMUSG00000005413(Hmox1),ENSMUSG00000005686(Ampd3),ENSMUSG00000006705(Pknox1),ENSMUSG00000014599(Csf1),ENSMUSG00000015605(Srf),ENSMUSG00000017978(Cadps2),ENSMUSG00000018654(Ikzf1),ENSMUSG00000019850(Tnfaip3),ENSMUSG00…	ENSMUSG00000000751(Rpa1),ENSMUSG00000001761(Smo),ENSMUSG00000003812(Dnase2a),ENSMUSG00000003882(Il7r),ENSMUSG00000005583(Mef2c),ENSMUSG00000014361(Mertk),ENSMUSG00000017697(Ada),ENSMUSG00000018395(Kif3a),ENSMUSG00000018669(Cdk5rap3),ENSMUSG00000019966(Kitl),ENSMUSG00000021127(Zfp36l1),ENSMUSG00000022105(Rb1),ENSMUSG00000022526(Zfp251),ENSMUSG00000022672(Prkdc),ENSMUSG00000024140(Epas1),ENSMUSG000…
BP	GO:0006974	cellular response to DNA damage stimulus	82	129	211	753	2.40714e-12	1.00926e-10	ENSMUSG00000001707(Eef1e1),ENSMUSG00000003208(Yju2),ENSMUSG00000003541(Ier3),ENSMUSG00000004221(Ikbkg),ENSMUSG00000004446(Bid),ENSMUSG00000005087(Cd44),ENSMUSG00000005413(Hmox1),ENSMUSG00000006818(Sod2),ENSMUSG00000016528(Mapkapk2),ENSMUSG00000017291(Taok1),ENSMUSG00000020038(Cry1),ENSMUSG00000020108(Ddit4),ENSMUSG00000020122(Egfr),ENSMUSG00000020415(Pttg1),ENSMUSG00000020423(Btg2),ENSMUSG0000002…	ENSMUSG00000000028(Cdc45),ENSMUSG00000000751(Rpa1),ENSMUSG00000001228(Uhrf1),ENSMUSG00000002083(Bbc3),ENSMUSG00000002109(Ddb2),ENSMUSG00000002835(Chaf1a),ENSMUSG00000002870(Mcm2),ENSMUSG00000004071(Cdip1),ENSMUSG00000005102(Eif2ak4),ENSMUSG00000005370(Msh6),ENSMUSG00000005718(Tfap4),ENSMUSG00000006288(Ttc5),ENSMUSG00000006678(Pola1),ENSMUSG00000007035(Msh5),ENSMUSG00000007080(Pole),ENSMUSG0000000…
BP	GO:0060548	negative regulation of cell death	182	101	283	1081	2.60921e-12	1.08992e-10	ENSMUSG00000000184(Ccnd2),ENSMUSG00000000441(Raf1),ENSMUSG00000000555(Itga5),ENSMUSG00000000915(Hip1r),ENSMUSG00000001288(Rarg),ENSMUSG00000002413(Braf),ENSMUSG00000002602(Axl),ENSMUSG00000003283(Hck),ENSMUSG00000003541(Ier3),ENSMUSG00000003849(Nqo1),ENSMUSG00000004040(Stat3),ENSMUSG00000004043(Stat5a),ENSMUSG00000004221(Ikbkg),ENSMUSG00000004446(Bid),ENSMUSG00000004936(Map2k1),ENSMUSG00000005087…	ENSMUSG00000000282(Mnt),ENSMUSG00000000631(Myo18a),ENSMUSG00000000869(Il4),ENSMUSG00000001761(Smo),ENSMUSG00000002289(Angptl4),ENSMUSG00000003882(Il7r),ENSMUSG00000004099(Dnmt1),ENSMUSG00000005514(Por),ENSMUSG00000005583(Mef2c),ENSMUSG00000006235(Epor),ENSMUSG00000008305(Tle1),ENSMUSG00000010461(Eya4),ENSMUSG00000010751(Tnfrsf22),ENSMUSG00000013483(Card14),ENSMUSG00000014361(Mertk),ENSMUSG0000001…
BP	GO:0051641	cellular localization	312	313	625	2745	2.61347e-12	1.08992e-10	ENSMUSG00000000409(Lck),ENSMUSG00000000441(Raf1),ENSMUSG00000000628(Hk2),ENSMUSG00000000957(Mmp14),ENSMUSG00000000982(Ccl3),ENSMUSG00000001052(Sec24b),ENSMUSG00000001123(Lgals9),ENSMUSG00000001175(Calm1),ENSMUSG00000001300(Efnb2),ENSMUSG00000001416(Cct3),ENSMUSG00000001440(Kpnb1),ENSMUSG00000002413(Braf),ENSMUSG00000003352(Cacnb3),ENSMUSG00000003863(Ppfia3),ENSMUSG00000004040(Stat3),ENSMUSG000000…	ENSMUSG00000000037(Scml2),ENSMUSG00000000751(Rpa1),ENSMUSG00000000869(Il4),ENSMUSG00000000881(Dlg3),ENSMUSG00000001143(Lman2l),ENSMUSG00000001482(Def8),ENSMUSG00000001552(Jup),ENSMUSG00000001761(Smo),ENSMUSG00000002031(Ift46),ENSMUSG00000002055(Spag5),ENSMUSG00000002068(Ccne1),ENSMUSG00000002083(Bbc3),ENSMUSG00000002104(Rapsn),ENSMUSG00000003134(Tbc1d8),ENSMUSG00000003378(Grik5),ENSMUSG0000000345…
BP	GO:0009896	positive regulation of catabolic process	79	62	141	451	2.70146e-12	1.12362e-10	ENSMUSG00000000628(Hk2),ENSMUSG00000002227(Mov10),ENSMUSG00000004221(Ikbkg),ENSMUSG00000004446(Bid),ENSMUSG00000004936(Map2k1),ENSMUSG00000005413(Hmox1),ENSMUSG00000007655(Cav1),ENSMUSG00000011305(Plin5),ENSMUSG00000019471(Cdc37),ENSMUSG00000019850(Tnfaip3),ENSMUSG00000020115(Tbk1),ENSMUSG00000020423(Btg2),ENSMUSG00000020464(Pnpt1),ENSMUSG00000020642(Rnf144a),ENSMUSG00000021109(Hif1a),ENSMUSG0000…	ENSMUSG00000000869(Il4),ENSMUSG00000004798(Ulk2),ENSMUSG00000005102(Eif2ak4),ENSMUSG00000006362(Cbfa2t3),ENSMUSG00000020101(Vsir),ENSMUSG00000021127(Zfp36l1),ENSMUSG00000021236(Entpd5),ENSMUSG00000021482(Prxl2c),ENSMUSG00000022051(Bnip3l),ENSMUSG00000022150(Dab2),ENSMUSG00000022433(Csnk1e),ENSMUSG00000022708(Zbtb20),ENSMUSG00000023019(Gpd1),ENSMUSG00000023826(Prkn),ENSMUSG00000023990(Tfeb),ENSMUS…
BP	GO:0120031	plasma membrane bounded cell projection assembly	58	97	155	510	2.73718e-12	1.13546e-10	ENSMUSG00000007655(Cav1),ENSMUSG00000008892(Vdac3),ENSMUSG00000015605(Srf),ENSMUSG00000018736(Ndel1),ENSMUSG00000020024(Cep83),ENSMUSG00000020476(Dbnl),ENSMUSG00000020900(Myh10),ENSMUSG00000021270(Hsp90aa1),ENSMUSG00000021823(Vcl),ENSMUSG00000021948(Prkcd),ENSMUSG00000022200(Golph3),ENSMUSG00000022272(Myo10),ENSMUSG00000022377(Asap1),ENSMUSG00000024143(Rhoq),ENSMUSG00000024290(Rock1),ENSMUSG00000…	ENSMUSG00000001482(Def8),ENSMUSG00000002031(Ift46),ENSMUSG00000002486(Tchp),ENSMUSG00000004530(Coro1c),ENSMUSG00000004768(Rab23),ENSMUSG00000006464(Bbs1),ENSMUSG00000012609(Ttll5),ENSMUSG00000015766(Eps8),ENSMUSG00000018199(Ro60),ENSMUSG00000018395(Kif3a),ENSMUSG00000019952(Poc1b),ENSMUSG00000020308(Tpgs1),ENSMUSG00000020319(Wdpcp),ENSMUSG00000020669(Sh3yl1),ENSMUSG00000020895(Tmem107),ENSMUSG000…
BP	GO:0010243	response to organonitrogen compound	168	114	282	1077	2.80232e-12	1.1594e-10	ENSMUSG00000000275(Trim25),ENSMUSG00000001175(Calm1),ENSMUSG00000002413(Braf),ENSMUSG00000002997(Prkar2b),ENSMUSG00000003849(Nqo1),ENSMUSG00000004040(Stat3),ENSMUSG00000004043(Stat5a),ENSMUSG00000005057(Sh2b2),ENSMUSG00000007655(Cav1),ENSMUSG00000014226(Cacybp),ENSMUSG00000015340(Cybb),ENSMUSG00000015839(Nfe2l2),ENSMUSG00000016529(Il10),ENSMUSG00000017652(Cd40),ENSMUSG00000017737(Mmp9),ENSMUSG000…	ENSMUSG00000000440(Pparg),ENSMUSG00000001552(Jup),ENSMUSG00000004099(Dnmt1),ENSMUSG00000004698(Hdac9),ENSMUSG00000005514(Por),ENSMUSG00000005583(Mef2c),ENSMUSG00000008855(Hdac5),ENSMUSG00000010663(Fads1),ENSMUSG00000014158(Trpv4),ENSMUSG00000014905(Dnajb9),ENSMUSG00000015944(Castor2),ENSMUSG00000016552(Foxred2),ENSMUSG00000017146(Brca1),ENSMUSG00000017697(Ada),ENSMUSG00000020027(Socs2),ENSMUSG000…
BP	GO:0007010	cytoskeleton organization	177	171	348	1387	2.91694e-12	1.20364e-10	ENSMUSG00000000441(Raf1),ENSMUSG00000000915(Hip1r),ENSMUSG00000000982(Ccl3),ENSMUSG00000001175(Calm1),ENSMUSG00000001440(Kpnb1),ENSMUSG00000001473(Tubb6),ENSMUSG00000002233(Rhoc),ENSMUSG00000002413(Braf),ENSMUSG00000002812(Flii),ENSMUSG00000003283(Hck),ENSMUSG00000005057(Sh2b2),ENSMUSG00000005732(Ranbp1),ENSMUSG00000007655(Cav1),ENSMUSG00000009376(Met),ENSMUSG00000013076(Amotl1),ENSMUSG0000001460…	ENSMUSG00000000631(Myo18a),ENSMUSG00000002031(Ift46),ENSMUSG00000002055(Spag5),ENSMUSG00000003452(Bicd1),ENSMUSG00000004530(Coro1c),ENSMUSG00000005233(Spc25),ENSMUSG00000005583(Mef2c),ENSMUSG00000005699(Pard6a),ENSMUSG00000006464(Bbs1),ENSMUSG00000009418(Nav1),ENSMUSG00000010021(Kif19a),ENSMUSG00000012609(Ttll5),ENSMUSG00000014158(Trpv4),ENSMUSG00000014778(Fhod1),ENSMUSG00000015711(Prune1),ENSMUS…
BP	GO:0002833	positive regulation of response to biotic stimulus	55	11	66	159	2.97218e-12	1.22042e-10	ENSMUSG00000000776(Polr3d),ENSMUSG00000001123(Lgals9),ENSMUSG00000004043(Stat5a),ENSMUSG00000004296(Il12b),ENSMUSG00000010358(Ifi35),ENSMUSG00000016496(Cd274),ENSMUSG00000017830(Dhx58),ENSMUSG00000020115(Tbk1),ENSMUSG00000021270(Hsp90aa1),ENSMUSG00000021938(Pspc1),ENSMUSG00000022126(Acod1),ENSMUSG00000022752(Tomm70a),ENSMUSG00000022906(Parp9),ENSMUSG00000024404(Riok3),ENSMUSG00000025058(Tasl),ENS…	ENSMUSG00000020399(Havcr2),ENSMUSG00000022471(Xrcc6),ENSMUSG00000022672(Prkdc),ENSMUSG00000024349(Sting1),ENSMUSG00000026187(Xrcc5),ENSMUSG00000026471(Mr1),ENSMUSG00000028456(Unc13b),ENSMUSG00000029821(Gsdme),ENSMUSG00000035834(Polr3g),ENSMUSG00000039005(Tlr4),ENSMUSG00000049709(Nlrp10)
BP	GO:0031327	negative regulation of cellular biosynthetic process	196	204	400	1636	2.97321e-12	1.22042e-10	ENSMUSG00000000317(Bcl6b),ENSMUSG00000000730(Dnmt3l),ENSMUSG00000000838(Fmr1),ENSMUSG00000001288(Rarg),ENSMUSG00000001348(Acp5),ENSMUSG00000002111(Spi1),ENSMUSG00000002227(Mov10),ENSMUSG00000002307(Daxx),ENSMUSG00000002881(Nab1),ENSMUSG00000002983(Relb),ENSMUSG00000004040(Stat3),ENSMUSG00000005774(Rfx5),ENSMUSG00000007655(Cav1),ENSMUSG00000013415(Igf2bp1),ENSMUSG00000015605(Srf),ENSMUSG0000001583…	ENSMUSG00000000028(Cdc45),ENSMUSG00000000037(Scml2),ENSMUSG00000000282(Mnt),ENSMUSG00000000440(Pparg),ENSMUSG00000000693(Loxl3),ENSMUSG00000000869(Il4),ENSMUSG00000001228(Uhrf1),ENSMUSG00000001761(Smo),ENSMUSG00000002068(Ccne1),ENSMUSG00000004099(Dnmt1),ENSMUSG00000004698(Hdac9),ENSMUSG00000005102(Eif2ak4),ENSMUSG00000005583(Mef2c),ENSMUSG00000005718(Tfap4),ENSMUSG00000005893(Nr2c2),ENSMUSG000000…
BP	GO:0006351	transcription, DNA-templated	405	373	778	3527	3.40929e-12	1.39576e-10	ENSMUSG00000000078(Klf6),ENSMUSG00000000275(Trim25),ENSMUSG00000000317(Bcl6b),ENSMUSG00000000441(Raf1),ENSMUSG00000000532(Acvr1b),ENSMUSG00000000730(Dnmt3l),ENSMUSG00000000776(Polr3d),ENSMUSG00000000982(Ccl3),ENSMUSG00000001288(Rarg),ENSMUSG00000001542(Ell2),ENSMUSG00000001627(Ifrd1),ENSMUSG00000001632(Brpf1),ENSMUSG00000001785(Pwp1),ENSMUSG00000002111(Spi1),ENSMUSG00000002307(Daxx),ENSMUSG000000…	ENSMUSG00000000028(Cdc45),ENSMUSG00000000037(Scml2),ENSMUSG00000000282(Mnt),ENSMUSG00000000440(Pparg),ENSMUSG00000000693(Loxl3),ENSMUSG00000000869(Il4),ENSMUSG00000001228(Uhrf1),ENSMUSG00000001552(Jup),ENSMUSG00000001761(Smo),ENSMUSG00000002068(Ccne1),ENSMUSG00000002409(Dyrk1b),ENSMUSG00000002486(Tchp),ENSMUSG00000003282(Plag1),ENSMUSG00000003575(Crtc1),ENSMUSG00000003992(Ssbp2),ENSMUSG0000000409…
BP	GO:0006810	transport	475	459	934	4335	3.56362e-12	1.45513e-10	ENSMUSG00000000385(Tmprss2),ENSMUSG00000000409(Lck),ENSMUSG00000000441(Raf1),ENSMUSG00000000628(Hk2),ENSMUSG00000000915(Hip1r),ENSMUSG00000000982(Ccl3),ENSMUSG00000001052(Sec24b),ENSMUSG00000001123(Lgals9),ENSMUSG00000001175(Calm1),ENSMUSG00000001248(Gramd1a),ENSMUSG00000001300(Efnb2),ENSMUSG00000001416(Cct3),ENSMUSG00000001440(Kpnb1),ENSMUSG00000001467(Cyp51),ENSMUSG00000002105(Slc39a13),ENSMUSG…	ENSMUSG00000000326(Comt),ENSMUSG00000000440(Pparg),ENSMUSG00000000631(Myo18a),ENSMUSG00000000693(Loxl3),ENSMUSG00000000869(Il4),ENSMUSG00000001138(Cnnm3),ENSMUSG00000001143(Lman2l),ENSMUSG00000001552(Jup),ENSMUSG00000001741(Il16),ENSMUSG00000001761(Smo),ENSMUSG00000002031(Ift46),ENSMUSG00000002055(Spag5),ENSMUSG00000002083(Bbc3),ENSMUSG00000002346(Slc25a42),ENSMUSG00000002908(Kcnn1),ENSMUSG000000…
BP	GO:0097659	nucleic acid-templated transcription	405	373	778	3528	3.63122e-12	1.47887e-10	ENSMUSG00000000078(Klf6),ENSMUSG00000000275(Trim25),ENSMUSG00000000317(Bcl6b),ENSMUSG00000000441(Raf1),ENSMUSG00000000532(Acvr1b),ENSMUSG00000000730(Dnmt3l),ENSMUSG00000000776(Polr3d),ENSMUSG00000000982(Ccl3),ENSMUSG00000001288(Rarg),ENSMUSG00000001542(Ell2),ENSMUSG00000001627(Ifrd1),ENSMUSG00000001632(Brpf1),ENSMUSG00000001785(Pwp1),ENSMUSG00000002111(Spi1),ENSMUSG00000002307(Daxx),ENSMUSG000000…	ENSMUSG00000000028(Cdc45),ENSMUSG00000000037(Scml2),ENSMUSG00000000282(Mnt),ENSMUSG00000000440(Pparg),ENSMUSG00000000693(Loxl3),ENSMUSG00000000869(Il4),ENSMUSG00000001228(Uhrf1),ENSMUSG00000001552(Jup),ENSMUSG00000001761(Smo),ENSMUSG00000002068(Ccne1),ENSMUSG00000002409(Dyrk1b),ENSMUSG00000002486(Tchp),ENSMUSG00000003282(Plag1),ENSMUSG00000003575(Crtc1),ENSMUSG00000003992(Ssbp2),ENSMUSG0000000409…
BP	GO:0006909	phagocytosis	48	33	81	214	3.74651e-12	1.52186e-10	ENSMUSG00000002602(Axl),ENSMUSG00000003283(Hck),ENSMUSG00000015316(Slamf1),ENSMUSG00000017631(Abr),ENSMUSG00000020437(Myo1g),ENSMUSG00000021457(Syk),ENSMUSG00000023206(Il15ra),ENSMUSG00000024164(C3),ENSMUSG00000024174(Pot1b),ENSMUSG00000024401(Tnf),ENSMUSG00000024743(Syt7),ENSMUSG00000025044(Msr1),ENSMUSG00000025809(Itgb1),ENSMUSG00000026390(Marco),ENSMUSG00000026395(Ptprc),ENSMUSG00000027398(Il1…	ENSMUSG00000000440(Pparg),ENSMUSG00000000631(Myo18a),ENSMUSG00000004530(Coro1c),ENSMUSG00000010054(Tusc2),ENSMUSG00000013495(Tmem175),ENSMUSG00000014361(Mertk),ENSMUSG00000017670(Elmo2),ENSMUSG00000019944(Rhobtb1),ENSMUSG00000020263(Appl2),ENSMUSG00000020689(Itgb3),ENSMUSG00000022075(Rhobtb2),ENSMUSG00000026842(Abl1),ENSMUSG00000029204(Rhoh),ENSMUSG00000029468(P2rx7),ENSMUSG00000030047(Arhgap25),…
BP	GO:0000278	mitotic cell cycle	104	121	225	819	3.7622e-12	1.52428e-10	ENSMUSG00000000184(Ccnd2),ENSMUSG00000000532(Acvr1b),ENSMUSG00000001175(Calm1),ENSMUSG00000001440(Kpnb1),ENSMUSG00000001473(Tubb6),ENSMUSG00000002233(Rhoc),ENSMUSG00000004043(Stat5a),ENSMUSG00000004266(Ptpn6),ENSMUSG00000004446(Bid),ENSMUSG00000004591(Pkn2),ENSMUSG00000004936(Map2k1),ENSMUSG00000005732(Ranbp1),ENSMUSG00000017291(Taok1),ENSMUSG00000017561(Crlf3),ENSMUSG00000018707(Dync1h1),ENSMUSG…	ENSMUSG00000000028(Cdc45),ENSMUSG00000002055(Spag5),ENSMUSG00000002068(Ccne1),ENSMUSG00000002870(Mcm2),ENSMUSG00000002871(Tpra1),ENSMUSG00000003518(Dusp3),ENSMUSG00000005233(Spc25),ENSMUSG00000005718(Tfap4),ENSMUSG00000006678(Pola1),ENSMUSG00000007080(Pole),ENSMUSG00000010051(Hyal1),ENSMUSG00000012483(Rpa3),ENSMUSG00000015766(Eps8),ENSMUSG00000017146(Brca1),ENSMUSG00000017466(Timp2),ENSMUSG000000…
BP	GO:0070925	organelle assembly	94	131	225	820	4.2852e-12	1.73168e-10	ENSMUSG00000001440(Kpnb1),ENSMUSG00000002812(Flii),ENSMUSG00000002845(Tmem39a),ENSMUSG00000003283(Hck),ENSMUSG00000004100(Ppan),ENSMUSG00000008892(Vdac3),ENSMUSG00000015335(Zdhhc12),ENSMUSG00000015605(Srf),ENSMUSG00000017009(Sdc4),ENSMUSG00000018040(Rrp7a),ENSMUSG00000018171(Vmp1),ENSMUSG00000018583(G3bp1),ENSMUSG00000018707(Dync1h1),ENSMUSG00000018916(Csf2),ENSMUSG00000020024(Cep83),ENSMUSG00000…	ENSMUSG00000002031(Ift46),ENSMUSG00000002055(Spag5),ENSMUSG00000002486(Tchp),ENSMUSG00000003452(Bicd1),ENSMUSG00000004768(Rab23),ENSMUSG00000005583(Mef2c),ENSMUSG00000005682(Pan2),ENSMUSG00000006464(Bbs1),ENSMUSG00000012609(Ttll5),ENSMUSG00000013495(Tmem175),ENSMUSG00000018199(Ro60),ENSMUSG00000018395(Kif3a),ENSMUSG00000019773(Fbxo5),ENSMUSG00000019952(Poc1b),ENSMUSG00000020308(Tpgs1),ENSMUSG0000…
BP	GO:0035455	response to interferon-alpha	20	2	22	28	4.38758e-12	1.76849e-10	ENSMUSG00000002602(Axl),ENSMUSG00000022346(Myc),ENSMUSG00000022967(Ifnar1),ENSMUSG00000022971(Ifnar2),ENSMUSG00000024079(Eif2ak2),ENSMUSG00000025491(Ifitm1),ENSMUSG00000025492(Ifitm3),ENSMUSG00000027951(Adar),ENSMUSG00000032369(Plscr1),ENSMUSG00000034459(Ifit1),ENSMUSG00000043702(Pde12),ENSMUSG00000045932(Ifit2),ENSMUSG00000046718(Bst2),ENSMUSG00000060591(Ifitm2),ENSMUSG00000062488(Ifit3b),ENSMUS…	ENSMUSG00000018199(Ro60),ENSMUSG00000031451(Gas6)
BP	GO:0018193	peptidyl-amino acid modification	174	146	320	1260	5.05136e-12	2.0308e-10	ENSMUSG00000000409(Lck),ENSMUSG00000000441(Raf1),ENSMUSG00000000532(Acvr1b),ENSMUSG00000000555(Itga5),ENSMUSG00000001630(Stk38l),ENSMUSG00000001632(Brpf1),ENSMUSG00000001785(Pwp1),ENSMUSG00000002111(Spi1),ENSMUSG00000002413(Braf),ENSMUSG00000002602(Axl),ENSMUSG00000003283(Hck),ENSMUSG00000004043(Stat5a),ENSMUSG00000004266(Ptpn6),ENSMUSG00000004296(Il12b),ENSMUSG00000004591(Pkn2),ENSMUSG0000000493…	ENSMUSG00000000693(Loxl3),ENSMUSG00000000869(Il4),ENSMUSG00000000881(Dlg3),ENSMUSG00000002409(Dyrk1b),ENSMUSG00000002732(Fkbp7),ENSMUSG00000004099(Dnmt1),ENSMUSG00000004698(Hdac9),ENSMUSG00000004933(Matk),ENSMUSG00000005514(Por),ENSMUSG00000005958(Ephb3),ENSMUSG00000010047(Hyal2),ENSMUSG00000012609(Ttll5),ENSMUSG00000014361(Mertk),ENSMUSG00000015981(Stk32c),ENSMUSG00000017146(Brca1),ENSMUSG000000…
BP	GO:1902532	negative regulation of intracellular signal transduction	89	66	155	514	5.38412e-12	2.15903e-10	ENSMUSG00000001098(Kctd10),ENSMUSG00000001175(Calm1),ENSMUSG00000003208(Yju2),ENSMUSG00000004221(Ikbkg),ENSMUSG00000004266(Ptpn6),ENSMUSG00000004446(Bid),ENSMUSG00000004936(Map2k1),ENSMUSG00000004952(Rasa4),ENSMUSG00000005087(Cd44),ENSMUSG00000006818(Sod2),ENSMUSG00000007655(Cav1),ENSMUSG00000009376(Met),ENSMUSG00000009630(Ppp2cb),ENSMUSG00000010358(Ifi35),ENSMUSG00000015839(Nfe2l2),ENSMUSG000000…	ENSMUSG00000003518(Dusp3),ENSMUSG00000008305(Tle1),ENSMUSG00000010047(Hyal2),ENSMUSG00000015944(Castor2),ENSMUSG00000017466(Timp2),ENSMUSG00000017550(Atad5),ENSMUSG00000018669(Cdk5rap3),ENSMUSG00000018849(Wwc1),ENSMUSG00000019768(Esr1),ENSMUSG00000019960(Dusp6),ENSMUSG00000020424(Castor1),ENSMUSG00000020889(Nr1d1),ENSMUSG00000021368(Tbc1d7),ENSMUSG00000021699(Pde4d),ENSMUSG00000022114(Spry2),ENSM…
BP	GO:0002706	regulation of lymphocyte mediated immunity	42	22	64	154	5.9335e-12	2.37325e-10	ENSMUSG00000001123(Lgals9),ENSMUSG00000004043(Stat5a),ENSMUSG00000004266(Ptpn6),ENSMUSG00000004296(Il12b),ENSMUSG00000015316(Slamf1),ENSMUSG00000017652(Cd40),ENSMUSG00000017776(Crk),ENSMUSG00000020641(Rsad2),ENSMUSG00000024164(C3),ENSMUSG00000024339(Tap2),ENSMUSG00000024401(Tnf),ENSMUSG00000024402(Lta),ENSMUSG00000025383(Il23a),ENSMUSG00000025746(Il6),ENSMUSG00000026395(Ptprc),ENSMUSG00000026399(…	ENSMUSG00000000869(Il4),ENSMUSG00000003882(Il7r),ENSMUSG00000006611(Hfe),ENSMUSG00000017550(Atad5),ENSMUSG00000018752(Tnfsfm13),ENSMUSG00000020101(Vsir),ENSMUSG00000020399(Havcr2),ENSMUSG00000024151(Msh2),ENSMUSG00000025880(Smad7),ENSMUSG00000026012(Cd28),ENSMUSG00000026471(Mr1),ENSMUSG00000029468(P2rx7),ENSMUSG00000030051(Aplf),ENSMUSG00000031101(Sash3),ENSMUSG00000032498(Mlh1),ENSMUSG0000003658…
BP	GO:0048646	anatomical structure formation involved in morphogenesis	174	120	294	1140	6.21654e-12	2.48012e-10	ENSMUSG00000000555(Itga5),ENSMUSG00000000628(Hk2),ENSMUSG00000000957(Mmp14),ENSMUSG00000001052(Sec24b),ENSMUSG00000001098(Kctd10),ENSMUSG00000001288(Rarg),ENSMUSG00000001300(Efnb2),ENSMUSG00000001435(Col18a1),ENSMUSG00000001632(Brpf1),ENSMUSG00000002812(Flii),ENSMUSG00000004040(Stat3),ENSMUSG00000004266(Ptpn6),ENSMUSG00000004296(Il12b),ENSMUSG00000004936(Map2k1),ENSMUSG00000005413(Hmox1),ENSMUSG0…	ENSMUSG00000000440(Pparg),ENSMUSG00000000869(Il4),ENSMUSG00000001552(Jup),ENSMUSG00000001761(Smo),ENSMUSG00000002289(Angptl4),ENSMUSG00000002409(Dyrk1b),ENSMUSG00000004105(Angptl2),ENSMUSG00000004565(Pnpla6),ENSMUSG00000004698(Hdac9),ENSMUSG00000005583(Mef2c),ENSMUSG00000005958(Ephb3),ENSMUSG00000008855(Hdac5),ENSMUSG00000010051(Hyal1),ENSMUSG00000015745(Plekho1),ENSMUSG00000015846(Rxra),ENSMUSG0…
BP	GO:0045597	positive regulation of cell differentiation	170	113	283	1089	6.38881e-12	2.54236e-10	ENSMUSG00000000409(Lck),ENSMUSG00000000532(Acvr1b),ENSMUSG00000000957(Mmp14),ENSMUSG00000000982(Ccl3),ENSMUSG00000001123(Lgals9),ENSMUSG00000001300(Efnb2),ENSMUSG00000001785(Pwp1),ENSMUSG00000002413(Braf),ENSMUSG00000002602(Axl),ENSMUSG00000003948(Mmd),ENSMUSG00000004040(Stat3),ENSMUSG00000004043(Stat5a),ENSMUSG00000004296(Il12b),ENSMUSG00000004936(Map2k1),ENSMUSG00000005610(Eif4g2),ENSMUSG000000…	ENSMUSG00000000440(Pparg),ENSMUSG00000000869(Il4),ENSMUSG00000001761(Smo),ENSMUSG00000002068(Ccne1),ENSMUSG00000002274(Metrn),ENSMUSG00000003282(Plag1),ENSMUSG00000003575(Crtc1),ENSMUSG00000003882(Il7r),ENSMUSG00000005514(Por),ENSMUSG00000005583(Mef2c),ENSMUSG00000005893(Nr2c2),ENSMUSG00000006235(Epor),ENSMUSG00000013622(Atraid),ENSMUSG00000017466(Timp2),ENSMUSG00000017697(Ada),ENSMUSG00000019773…
CC	GO:0045335	phagocytic vesicle	37	13	50	107	6.5043e-12	2.58175e-10	ENSMUSG00000006740(Kif5b),ENSMUSG00000015316(Slamf1),ENSMUSG00000015340(Cybb),ENSMUSG00000020671(Rab10),ENSMUSG00000021457(Syk),ENSMUSG00000023460(Rab12),ENSMUSG00000024308(Tapbp),ENSMUSG00000024743(Syt7),ENSMUSG00000025278(Flnb),ENSMUSG00000026425(Srgap2),ENSMUSG00000026470(Stx6),ENSMUSG00000026797(Stxbp1),ENSMUSG00000027882(Stxbp3),ENSMUSG00000027995(Tlr2),ENSMUSG00000028879(Stx12),ENSMUSG00000…	ENSMUSG00000000631(Myo18a),ENSMUSG00000004768(Rab23),ENSMUSG00000020263(Appl2),ENSMUSG00000020546(Stxbp4),ENSMUSG00000028456(Unc13b),ENSMUSG00000031988(Vps26b),ENSMUSG00000035354(Uvrag),ENSMUSG00000037526(Atg14),ENSMUSG00000051343(Rab11fip5),ENSMUSG00000052160(Pld4),ENSMUSG00000052688(Rab7b),ENSMUSG00000055069(Rab39),ENSMUSG00000068923(Syt11)
BP	GO:0002824	positive regulation of adaptive immune response based on somatic recombination of immune receptors built from immunoglobulin superfamily domains	33	17	50	107	6.79751e-12	2.6913e-10	ENSMUSG00000004296(Il12b),ENSMUSG00000016496(Cd274),ENSMUSG00000017652(Cd40),ENSMUSG00000018899(Irf1),ENSMUSG00000020641(Rsad2),ENSMUSG00000024164(C3),ENSMUSG00000024339(Tap2),ENSMUSG00000024401(Tnf),ENSMUSG00000024402(Lta),ENSMUSG00000025383(Il23a),ENSMUSG00000025746(Il6),ENSMUSG00000026395(Ptprc),ENSMUSG00000026700(Tnfsf4),ENSMUSG00000026942(Traf2),ENSMUSG00000027398(Il1b),ENSMUSG00000027776(Il…	ENSMUSG00000000869(Il4),ENSMUSG00000017550(Atad5),ENSMUSG00000017697(Ada),ENSMUSG00000018752(Tnfsfm13),ENSMUSG00000024151(Msh2),ENSMUSG00000026012(Cd28),ENSMUSG00000026471(Mr1),ENSMUSG00000029468(P2rx7),ENSMUSG00000031101(Sash3),ENSMUSG00000031497(Tnfsf13b),ENSMUSG00000032498(Mlh1),ENSMUSG00000041471(Shld2),ENSMUSG00000044991(Shld1),ENSMUSG00000049103(Ccr2),ENSMUSG00000049709(Nlrp10),ENSMUSG00000…
BP	GO:0014070	response to organic cyclic compound	170	101	271	1034	6.86821e-12	2.71242e-10	ENSMUSG00000000275(Trim25),ENSMUSG00000000957(Mmp14),ENSMUSG00000000982(Ccl3),ENSMUSG00000001175(Calm1),ENSMUSG00000001248(Gramd1a),ENSMUSG00000001663(Gstt1),ENSMUSG00000002307(Daxx),ENSMUSG00000002413(Braf),ENSMUSG00000002997(Prkar2b),ENSMUSG00000003849(Nqo1),ENSMUSG00000004040(Stat3),ENSMUSG00000004043(Stat5a),ENSMUSG00000004446(Bid),ENSMUSG00000004936(Map2k1),ENSMUSG00000005732(Ranbp1),ENSMUSG…	ENSMUSG00000000326(Comt),ENSMUSG00000000440(Pparg),ENSMUSG00000001552(Jup),ENSMUSG00000001761(Smo),ENSMUSG00000005198(Polr2a),ENSMUSG00000005583(Mef2c),ENSMUSG00000005718(Tfap4),ENSMUSG00000008855(Hdac5),ENSMUSG00000010663(Fads1),ENSMUSG00000015846(Rxra),ENSMUSG00000017146(Brca1),ENSMUSG00000017697(Ada),ENSMUSG00000019768(Esr1),ENSMUSG00000019960(Dusp6),ENSMUSG00000020027(Socs2),ENSMUSG0000002064…
BP	GO:0045580	regulation of T cell differentiation	41	21	62	148	8.36795e-12	3.29638e-10	ENSMUSG00000000409(Lck),ENSMUSG00000001123(Lgals9),ENSMUSG00000002413(Braf),ENSMUSG00000004043(Stat5a),ENSMUSG00000015396(Cd83),ENSMUSG00000018899(Irf1),ENSMUSG00000019982(Myb),ENSMUSG00000021270(Hsp90aa1),ENSMUSG00000021457(Syk),ENSMUSG00000024238(Zeb1),ENSMUSG00000024334(H2-Oa),ENSMUSG00000024539(Ptpn2),ENSMUSG00000025383(Il23a),ENSMUSG00000025746(Il6),ENSMUSG00000026395(Ptprc),ENSMUSG000000267…	ENSMUSG00000000693(Loxl3),ENSMUSG00000000869(Il4),ENSMUSG00000003882(Il7r),ENSMUSG00000017697(Ada),ENSMUSG00000020101(Vsir),ENSMUSG00000025880(Smad7),ENSMUSG00000026012(Cd28),ENSMUSG00000026842(Abl1),ENSMUSG00000027239(Mdk),ENSMUSG00000029204(Rhoh),ENSMUSG00000031101(Sash3),ENSMUSG00000032440(Tgfbr2),ENSMUSG00000033767(Tmem131l),ENSMUSG00000036526(Card11),ENSMUSG00000039384(Dusp10),ENSMUSG0000004…
BP	GO:0032880	regulation of protein localization	139	109	248	930	8.52712e-12	3.35064e-10	ENSMUSG00000000275(Trim25),ENSMUSG00000000957(Mmp14),ENSMUSG00000001300(Efnb2),ENSMUSG00000001416(Cct3),ENSMUSG00000001467(Cyp51),ENSMUSG00000003352(Cacnb3),ENSMUSG00000003948(Mmd),ENSMUSG00000004296(Il12b),ENSMUSG00000004936(Map2k1),ENSMUSG00000005763(Cd247),ENSMUSG00000006740(Kif5b),ENSMUSG00000015176(Nolc1),ENSMUSG00000015837(Sqstm1),ENSMUSG00000018736(Ndel1),ENSMUSG00000020122(Egfr),ENSMUSG00…	ENSMUSG00000000631(Myo18a),ENSMUSG00000001552(Jup),ENSMUSG00000001761(Smo),ENSMUSG00000002068(Ccne1),ENSMUSG00000002083(Bbc3),ENSMUSG00000003452(Bicd1),ENSMUSG00000004347(Pde1c),ENSMUSG00000004768(Rab23),ENSMUSG00000005699(Pard6a),ENSMUSG00000006611(Hfe),ENSMUSG00000010047(Hyal2),ENSMUSG00000015968(Cacna1d),ENSMUSG00000017146(Brca1),ENSMUSG00000018395(Kif3a),ENSMUSG00000018398(Septin8),ENSMUSG000…
BP	GO:0009725	response to hormone	161	101	262	995	9.21341e-12	3.61124e-10	ENSMUSG00000000957(Mmp14),ENSMUSG00000001175(Calm1),ENSMUSG00000001288(Rarg),ENSMUSG00000001663(Gstt1),ENSMUSG00000002307(Daxx),ENSMUSG00000002413(Braf),ENSMUSG00000003206(Ebi3),ENSMUSG00000003849(Nqo1),ENSMUSG00000004040(Stat3),ENSMUSG00000004043(Stat5a),ENSMUSG00000004446(Bid),ENSMUSG00000004936(Map2k1),ENSMUSG00000005057(Sh2b2),ENSMUSG00000007655(Cav1),ENSMUSG00000014226(Cacybp),ENSMUSG0000001…	ENSMUSG00000000440(Pparg),ENSMUSG00000004698(Hdac9),ENSMUSG00000005514(Por),ENSMUSG00000005583(Mef2c),ENSMUSG00000005718(Tfap4),ENSMUSG00000010663(Fads1),ENSMUSG00000014158(Trpv4),ENSMUSG00000015846(Rxra),ENSMUSG00000017146(Brca1),ENSMUSG00000019768(Esr1),ENSMUSG00000020027(Socs2),ENSMUSG00000020091(Eif4ebp2),ENSMUSG00000020189(Osbpl8),ENSMUSG00000020263(Appl2),ENSMUSG00000020546(Stxbp4),ENSMUSG0…
BP	GO:0070374	positive regulation of ERK1 and ERK2 cascade	54	28	82	221	9.24902e-12	3.61614e-10	ENSMUSG00000000982(Ccl3),ENSMUSG00000002413(Braf),ENSMUSG00000004936(Map2k1),ENSMUSG00000005087(Cd44),ENSMUSG00000015316(Slamf1),ENSMUSG00000018930(Ccl4),ENSMUSG00000019122(Ccl9),ENSMUSG00000020122(Egfr),ENSMUSG00000021670(Hmgcr),ENSMUSG00000022892(App),ENSMUSG00000023964(Calcr),ENSMUSG00000024164(C3),ENSMUSG00000024620(Pdgfrb),ENSMUSG00000025746(Il6),ENSMUSG00000026031(Cflar),ENSMUSG00000026166(…	ENSMUSG00000006235(Epor),ENSMUSG00000014158(Trpv4),ENSMUSG00000019768(Esr1),ENSMUSG00000020399(Havcr2),ENSMUSG00000020689(Itgb3),ENSMUSG00000021482(Prxl2c),ENSMUSG00000022114(Spry2),ENSMUSG00000023050(Map3k12),ENSMUSG00000024962(Vegfb),ENSMUSG00000025856(Pdgfa),ENSMUSG00000026228(Htr2b),ENSMUSG00000026842(Abl1),ENSMUSG00000027765(P2ry1),ENSMUSG00000027843(Ptpn22),ENSMUSG00000028019(Pdgfc),ENSMUSG…
BP	GO:0002699	positive regulation of immune effector process	62	21	83	225	9.84206e-12	3.8384e-10	ENSMUSG00000004043(Stat5a),ENSMUSG00000004296(Il12b),ENSMUSG00000004709(Cd244a),ENSMUSG00000005413(Hmox1),ENSMUSG00000016529(Il10),ENSMUSG00000017652(Cd40),ENSMUSG00000017830(Dhx58),ENSMUSG00000018500(Adora2b),ENSMUSG00000018899(Irf1),ENSMUSG00000019982(Myb),ENSMUSG00000020075(Ddx21),ENSMUSG00000020641(Rsad2),ENSMUSG00000021457(Syk),ENSMUSG00000024164(C3),ENSMUSG00000024339(Tap2),ENSMUSG000000244…	ENSMUSG00000000631(Myo18a),ENSMUSG00000000869(Il4),ENSMUSG00000017550(Atad5),ENSMUSG00000018752(Tnfsfm13),ENSMUSG00000020263(Appl2),ENSMUSG00000024151(Msh2),ENSMUSG00000026012(Cd28),ENSMUSG00000026471(Mr1),ENSMUSG00000027843(Ptpn22),ENSMUSG00000029468(P2rx7),ENSMUSG00000031101(Sash3),ENSMUSG00000032498(Mlh1),ENSMUSG00000034652(Cd300a),ENSMUSG00000038147(Cd84),ENSMUSG00000039005(Tlr4),ENSMUSG00000…
CC	GO:0110165	cellular anatomical entity	1782	1761	3543	19288	1.0665e-11	4.14899e-10	ENSMUSG00000000078(Klf6),ENSMUSG00000000184(Ccnd2),ENSMUSG00000000275(Trim25),ENSMUSG00000000317(Bcl6b),ENSMUSG00000000385(Tmprss2),ENSMUSG00000000409(Lck),ENSMUSG00000000441(Raf1),ENSMUSG00000000532(Acvr1b),ENSMUSG00000000555(Itga5),ENSMUSG00000000628(Hk2),ENSMUSG00000000682(Cd52),ENSMUSG00000000730(Dnmt3l),ENSMUSG00000000732(Icosl),ENSMUSG00000000776(Polr3d),ENSMUSG00000000838(Fmr1),ENSMUSG0000…	ENSMUSG00000000028(Cdc45),ENSMUSG00000000037(Scml2),ENSMUSG00000000056(Narf),ENSMUSG00000000149(Gna12),ENSMUSG00000000282(Mnt),ENSMUSG00000000318(Clec10a),ENSMUSG00000000326(Comt),ENSMUSG00000000440(Pparg),ENSMUSG00000000631(Myo18a),ENSMUSG00000000686(Abhd15),ENSMUSG00000000693(Loxl3),ENSMUSG00000000751(Rpa1),ENSMUSG00000000823(Zfp512b),ENSMUSG00000000869(Il4),ENSMUSG00000000876(Pxmp4),ENSMUSG000…
BP	GO:0071495	cellular response to endogenous stimulus	174	161	335	1340	1.24706e-11	4.83938e-10	ENSMUSG00000001288(Rarg),ENSMUSG00000002307(Daxx),ENSMUSG00000002413(Braf),ENSMUSG00000003206(Ebi3),ENSMUSG00000003665(Has1),ENSMUSG00000004040(Stat3),ENSMUSG00000004043(Stat5a),ENSMUSG00000005057(Sh2b2),ENSMUSG00000005087(Cd44),ENSMUSG00000006205(Htra1),ENSMUSG00000007655(Cav1),ENSMUSG00000015340(Cybb),ENSMUSG00000015839(Nfe2l2),ENSMUSG00000016529(Il10),ENSMUSG00000017776(Crk),ENSMUSG00000018736…	ENSMUSG00000000440(Pparg),ENSMUSG00000000869(Il4),ENSMUSG00000001552(Jup),ENSMUSG00000003518(Dusp3),ENSMUSG00000004099(Dnmt1),ENSMUSG00000004698(Hdac9),ENSMUSG00000005514(Por),ENSMUSG00000005583(Mef2c),ENSMUSG00000005718(Tfap4),ENSMUSG00000006611(Hfe),ENSMUSG00000006800(Sulf2),ENSMUSG00000010047(Hyal2),ENSMUSG00000010051(Hyal1),ENSMUSG00000015846(Rxra),ENSMUSG00000015944(Castor2),ENSMUSG000000169…
BP	GO:0051091	positive regulation of DNA-binding transcription factor activity	67	22	89	249	1.31443e-11	5.08821e-10	ENSMUSG00000000275(Trim25),ENSMUSG00000001627(Ifrd1),ENSMUSG00000004040(Stat3),ENSMUSG00000004221(Ikbkg),ENSMUSG00000007655(Cav1),ENSMUSG00000015605(Srf),ENSMUSG00000016529(Il10),ENSMUSG00000017652(Cd40),ENSMUSG00000019782(Rwdd1),ENSMUSG00000020227(Irak3),ENSMUSG00000021024(Psma6),ENSMUSG00000021067(Sav1),ENSMUSG00000021367(Edn1),ENSMUSG00000022255(Mtdh),ENSMUSG00000022661(Cd200),ENSMUSG000000228…	ENSMUSG00000000440(Pparg),ENSMUSG00000000869(Il4),ENSMUSG00000001552(Jup),ENSMUSG00000001761(Smo),ENSMUSG00000003575(Crtc1),ENSMUSG00000008855(Hdac5),ENSMUSG00000013483(Card14),ENSMUSG00000015968(Cacna1d),ENSMUSG00000019768(Esr1),ENSMUSG00000020888(Dvl2),ENSMUSG00000023755(Rhebl1),ENSMUSG00000024349(Sting1),ENSMUSG00000024913(Lrp5),ENSMUSG00000026305(Lrrfip1),ENSMUSG00000028756(Pink1),ENSMUSG0000…
BP	GO:0044403	symbiotic process	89	35	124	389	1.339e-11	5.17051e-10	ENSMUSG00000000275(Trim25),ENSMUSG00000000385(Tmprss2),ENSMUSG00000000982(Ccl3),ENSMUSG00000002602(Axl),ENSMUSG00000002845(Tmem39a),ENSMUSG00000004591(Pkn2),ENSMUSG00000007655(Cav1),ENSMUSG00000017002(Slpi),ENSMUSG00000017737(Mmp9),ENSMUSG00000018362(Kpna2),ENSMUSG00000018930(Ccl4),ENSMUSG00000019868(Vta1),ENSMUSG00000020400(Tnip1),ENSMUSG00000020580(Rock2),ENSMUSG00000020641(Rsad2),ENSMUSG000000…	ENSMUSG00000003452(Bicd1),ENSMUSG00000004798(Ulk2),ENSMUSG00000005102(Eif2ak4),ENSMUSG00000005718(Tfap4),ENSMUSG00000006235(Epor),ENSMUSG00000010047(Hyal2),ENSMUSG00000010051(Hyal1),ENSMUSG00000010054(Tusc2),ENSMUSG00000015846(Rxra),ENSMUSG00000020689(Itgb3),ENSMUSG00000023826(Prkn),ENSMUSG00000024413(Npc1),ENSMUSG00000026433(Rab29),ENSMUSG00000026469(Xpr1),ENSMUSG00000027315(Spint1),ENSMUSG00000…
BP	GO:0035710	CD4-positive, alpha-beta T cell activation	33	14	47	99	1.43324e-11	5.52078e-10	ENSMUSG00000001123(Lgals9),ENSMUSG00000002413(Braf),ENSMUSG00000002983(Relb),ENSMUSG00000004040(Stat3),ENSMUSG00000004296(Il12b),ENSMUSG00000015396(Cd83),ENSMUSG00000016496(Cd274),ENSMUSG00000018899(Irf1),ENSMUSG00000019982(Myb),ENSMUSG00000020641(Rsad2),ENSMUSG00000025383(Il23a),ENSMUSG00000025746(Il6),ENSMUSG00000026700(Tnfsf4),ENSMUSG00000027776(Il12a),ENSMUSG00000028064(Sema4a),ENSMUSG0000003…	ENSMUSG00000000693(Loxl3),ENSMUSG00000000869(Il4),ENSMUSG00000020101(Vsir),ENSMUSG00000021356(Irf4),ENSMUSG00000023927(Satb1),ENSMUSG00000025880(Smad7),ENSMUSG00000027947(Il6ra),ENSMUSG00000031101(Sash3),ENSMUSG00000032238(Rora),ENSMUSG00000032440(Tgfbr2),ENSMUSG00000036587(Fut7),ENSMUSG00000044813(Shb),ENSMUSG00000049103(Ccr2),ENSMUSG00000051212(Gpr183)
BP	GO:0002253	activation of immune response	69	28	97	281	1.61873e-11	6.21998e-10	ENSMUSG00000000409(Lck),ENSMUSG00000000732(Icosl),ENSMUSG00000002413(Braf),ENSMUSG00000002699(Lcp2),ENSMUSG00000003352(Cacnb3),ENSMUSG00000004266(Ptpn6),ENSMUSG00000005057(Sh2b2),ENSMUSG00000005763(Cd247),ENSMUSG00000020115(Tbk1),ENSMUSG00000020437(Myo1g),ENSMUSG00000021270(Hsp90aa1),ENSMUSG00000021457(Syk),ENSMUSG00000021938(Pspc1),ENSMUSG00000022148(Fyb),ENSMUSG00000022752(Tomm70a),ENSMUSG00000…	ENSMUSG00000003518(Dusp3),ENSMUSG00000005583(Mef2c),ENSMUSG00000016933(Plcg1),ENSMUSG00000017697(Ada),ENSMUSG00000020263(Appl2),ENSMUSG00000021699(Pde4d),ENSMUSG00000022471(Xrcc6),ENSMUSG00000022672(Prkdc),ENSMUSG00000023915(Tnfrsf21),ENSMUSG00000024349(Sting1),ENSMUSG00000024696(Lpxn),ENSMUSG00000026012(Cd28),ENSMUSG00000026187(Xrcc5),ENSMUSG00000026433(Rab29),ENSMUSG00000026842(Abl1),ENSMUSG000…
BP	GO:2000113	negative regulation of cellular macromolecule biosynthetic process	187	194	381	1564	1.753e-11	6.71941e-10	ENSMUSG00000000317(Bcl6b),ENSMUSG00000000730(Dnmt3l),ENSMUSG00000000838(Fmr1),ENSMUSG00000001288(Rarg),ENSMUSG00000002111(Spi1),ENSMUSG00000002227(Mov10),ENSMUSG00000002307(Daxx),ENSMUSG00000002881(Nab1),ENSMUSG00000002983(Relb),ENSMUSG00000004040(Stat3),ENSMUSG00000005774(Rfx5),ENSMUSG00000007655(Cav1),ENSMUSG00000013415(Igf2bp1),ENSMUSG00000015605(Srf),ENSMUSG00000015837(Sqstm1),ENSMUSG00000015…	ENSMUSG00000000028(Cdc45),ENSMUSG00000000037(Scml2),ENSMUSG00000000282(Mnt),ENSMUSG00000000440(Pparg),ENSMUSG00000000693(Loxl3),ENSMUSG00000000869(Il4),ENSMUSG00000001228(Uhrf1),ENSMUSG00000001761(Smo),ENSMUSG00000002068(Ccne1),ENSMUSG00000004099(Dnmt1),ENSMUSG00000004698(Hdac9),ENSMUSG00000005102(Eif2ak4),ENSMUSG00000005583(Mef2c),ENSMUSG00000005718(Tfap4),ENSMUSG00000005893(Nr2c2),ENSMUSG000000…
BP	GO:0051254	positive regulation of RNA metabolic process	225	188	413	1720	1.8999e-11	7.26468e-10	ENSMUSG00000000078(Klf6),ENSMUSG00000000275(Trim25),ENSMUSG00000000441(Raf1),ENSMUSG00000000532(Acvr1b),ENSMUSG00000000982(Ccl3),ENSMUSG00000001288(Rarg),ENSMUSG00000001542(Ell2),ENSMUSG00000001627(Ifrd1),ENSMUSG00000001632(Brpf1),ENSMUSG00000001785(Pwp1),ENSMUSG00000002111(Spi1),ENSMUSG00000002227(Mov10),ENSMUSG00000002307(Daxx),ENSMUSG00000002658(Gtf2f1),ENSMUSG00000002983(Relb),ENSMUSG00000004…	ENSMUSG00000000440(Pparg),ENSMUSG00000000869(Il4),ENSMUSG00000001552(Jup),ENSMUSG00000001761(Smo),ENSMUSG00000002409(Dyrk1b),ENSMUSG00000003282(Plag1),ENSMUSG00000003575(Crtc1),ENSMUSG00000003992(Ssbp2),ENSMUSG00000004151(Etv1),ENSMUSG00000005198(Polr2a),ENSMUSG00000005583(Mef2c),ENSMUSG00000005718(Tfap4),ENSMUSG00000005893(Nr2c2),ENSMUSG00000006288(Ttc5),ENSMUSG00000008855(Hdac5),ENSMUSG00000010…
BP	GO:0002263	cell activation involved in immune response	66	32	98	286	2.06408e-11	7.8732e-10	ENSMUSG00000000732(Icosl),ENSMUSG00000000982(Ccl3),ENSMUSG00000001123(Lgals9),ENSMUSG00000002983(Relb),ENSMUSG00000004040(Stat3),ENSMUSG00000004296(Il12b),ENSMUSG00000004709(Cd244a),ENSMUSG00000005413(Hmox1),ENSMUSG00000010358(Ifi35),ENSMUSG00000013846(St3gal1),ENSMUSG00000014773(Dll1),ENSMUSG00000015316(Slamf1),ENSMUSG00000016529(Il10),ENSMUSG00000017631(Abr),ENSMUSG00000017652(Cd40),ENSMUSG0000…	ENSMUSG00000000693(Loxl3),ENSMUSG00000000869(Il4),ENSMUSG00000005102(Eif2ak4),ENSMUSG00000005370(Msh6),ENSMUSG00000017550(Atad5),ENSMUSG00000017697(Ada),ENSMUSG00000018752(Tnfsfm13),ENSMUSG00000020399(Havcr2),ENSMUSG00000021356(Irf4),ENSMUSG00000024151(Msh2),ENSMUSG00000025880(Smad7),ENSMUSG00000026012(Cd28),ENSMUSG00000026842(Abl1),ENSMUSG00000027239(Mdk),ENSMUSG00000027947(Il6ra),ENSMUSG0000002…
BP	GO:0070372	regulation of ERK1 and ERK2 cascade	71	35	106	318	2.12708e-11	8.08792e-10	ENSMUSG00000000982(Ccl3),ENSMUSG00000002413(Braf),ENSMUSG00000004266(Ptpn6),ENSMUSG00000004936(Map2k1),ENSMUSG00000005087(Cd44),ENSMUSG00000007655(Cav1),ENSMUSG00000015316(Slamf1),ENSMUSG00000018930(Ccl4),ENSMUSG00000019122(Ccl9),ENSMUSG00000020122(Egfr),ENSMUSG00000020400(Tnip1),ENSMUSG00000021457(Syk),ENSMUSG00000021670(Hmgcr),ENSMUSG00000022285(Ywhaz),ENSMUSG00000022892(App),ENSMUSG00000023964…	ENSMUSG00000003518(Dusp3),ENSMUSG00000006235(Epor),ENSMUSG00000014158(Trpv4),ENSMUSG00000019768(Esr1),ENSMUSG00000019960(Dusp6),ENSMUSG00000020399(Havcr2),ENSMUSG00000020689(Itgb3),ENSMUSG00000021482(Prxl2c),ENSMUSG00000022114(Spry2),ENSMUSG00000023050(Map3k12),ENSMUSG00000024962(Vegfb),ENSMUSG00000025486(Sirt3),ENSMUSG00000025856(Pdgfa),ENSMUSG00000026228(Htr2b),ENSMUSG00000026842(Abl1),ENSMUSG0…
BP	GO:0002821	positive regulation of adaptive immune response	33	18	51	113	2.13071e-11	8.08792e-10	ENSMUSG00000004296(Il12b),ENSMUSG00000016496(Cd274),ENSMUSG00000017652(Cd40),ENSMUSG00000018899(Irf1),ENSMUSG00000020641(Rsad2),ENSMUSG00000024164(C3),ENSMUSG00000024339(Tap2),ENSMUSG00000024401(Tnf),ENSMUSG00000024402(Lta),ENSMUSG00000025383(Il23a),ENSMUSG00000025746(Il6),ENSMUSG00000026395(Ptprc),ENSMUSG00000026700(Tnfsf4),ENSMUSG00000026942(Traf2),ENSMUSG00000027398(Il1b),ENSMUSG00000027776(Il…	ENSMUSG00000000869(Il4),ENSMUSG00000005102(Eif2ak4),ENSMUSG00000017550(Atad5),ENSMUSG00000017697(Ada),ENSMUSG00000018752(Tnfsfm13),ENSMUSG00000024151(Msh2),ENSMUSG00000026012(Cd28),ENSMUSG00000026471(Mr1),ENSMUSG00000029468(P2rx7),ENSMUSG00000031101(Sash3),ENSMUSG00000031497(Tnfsf13b),ENSMUSG00000032498(Mlh1),ENSMUSG00000041471(Shld2),ENSMUSG00000044991(Shld1),ENSMUSG00000049103(Ccr2),ENSMUSG0000…
BP	GO:0043367	CD4-positive, alpha-beta T cell differentiation	29	12	41	81	2.17262e-11	8.22703e-10	ENSMUSG00000002413(Braf),ENSMUSG00000002983(Relb),ENSMUSG00000004040(Stat3),ENSMUSG00000004296(Il12b),ENSMUSG00000015396(Cd83),ENSMUSG00000018899(Irf1),ENSMUSG00000019982(Myb),ENSMUSG00000020641(Rsad2),ENSMUSG00000025383(Il23a),ENSMUSG00000025746(Il6),ENSMUSG00000026700(Tnfsf4),ENSMUSG00000028064(Sema4a),ENSMUSG00000030067(Foxp1),ENSMUSG00000031154(Otud5),ENSMUSG00000031304(Il2rg),ENSMUSG00000031…	ENSMUSG00000000693(Loxl3),ENSMUSG00000000869(Il4),ENSMUSG00000021356(Irf4),ENSMUSG00000023927(Satb1),ENSMUSG00000025880(Smad7),ENSMUSG00000027947(Il6ra),ENSMUSG00000031101(Sash3),ENSMUSG00000032238(Rora),ENSMUSG00000036587(Fut7),ENSMUSG00000044813(Shb),ENSMUSG00000049103(Ccr2),ENSMUSG00000051212(Gpr183)
BP	GO:0071496	cellular response to external stimulus	60	53	113	347	2.45651e-11	9.27957e-10	ENSMUSG00000002602(Axl),ENSMUSG00000003352(Cacnb3),ENSMUSG00000004100(Ppan),ENSMUSG00000005413(Hmox1),ENSMUSG00000007655(Cav1),ENSMUSG00000015340(Cybb),ENSMUSG00000015605(Srf),ENSMUSG00000015839(Nfe2l2),ENSMUSG00000015957(Wnt11),ENSMUSG00000017652(Cd40),ENSMUSG00000017737(Mmp9),ENSMUSG00000017978(Cadps2),ENSMUSG00000018500(Adora2b),ENSMUSG00000018899(Irf1),ENSMUSG00000020122(Egfr),ENSMUSG00000020…	ENSMUSG00000000326(Comt),ENSMUSG00000000440(Pparg),ENSMUSG00000002289(Angptl4),ENSMUSG00000005102(Eif2ak4),ENSMUSG00000005374(Tbl2),ENSMUSG00000006611(Hfe),ENSMUSG00000010663(Fads1),ENSMUSG00000015944(Castor2),ENSMUSG00000020032(Nuak1),ENSMUSG00000020424(Castor1),ENSMUSG00000020647(Ncoa1),ENSMUSG00000021250(Fos),ENSMUSG00000021476(Habp4),ENSMUSG00000021754(Map3k1),ENSMUSG00000023826(Prkn),ENSMUSG…
BP	GO:0046578	regulation of Ras protein signal transduction	43	30	73	191	2.50817e-11	9.45186e-10	ENSMUSG00000001098(Kctd10),ENSMUSG00000004936(Map2k1),ENSMUSG00000004952(Rasa4),ENSMUSG00000005057(Sh2b2),ENSMUSG00000009376(Met),ENSMUSG00000009630(Ppp2cb),ENSMUSG00000014599(Csf1),ENSMUSG00000017776(Crk),ENSMUSG00000020573(Pik3cg),ENSMUSG00000021215(Net1),ENSMUSG00000021675(F2rl2),ENSMUSG00000021895(Arhgef3),ENSMUSG00000024277(Mapre2),ENSMUSG00000024620(Pdgfrb),ENSMUSG00000024976(Shoc2),ENSMUSG…	ENSMUSG00000015766(Eps8),ENSMUSG00000017132(Cyth1),ENSMUSG00000017466(Timp2),ENSMUSG00000019852(Arfgef3),ENSMUSG00000019966(Kitl),ENSMUSG00000022114(Spry2),ENSMUSG00000026271(Gpr35),ENSMUSG00000026842(Abl1),ENSMUSG00000028832(Stmn1),ENSMUSG00000030134(Rasgef1a),ENSMUSG00000031214(Ophn1),ENSMUSG00000031216(Stard8),ENSMUSG00000031453(Rasa3),ENSMUSG00000031785(Adgrg1),ENSMUSG00000032194(Kank2),ENSMU…
BP	GO:0002366	leukocyte activation involved in immune response	65	32	97	283	2.56167e-11	9.63028e-10	ENSMUSG00000000732(Icosl),ENSMUSG00000000982(Ccl3),ENSMUSG00000001123(Lgals9),ENSMUSG00000002983(Relb),ENSMUSG00000004040(Stat3),ENSMUSG00000004296(Il12b),ENSMUSG00000004709(Cd244a),ENSMUSG00000005413(Hmox1),ENSMUSG00000010358(Ifi35),ENSMUSG00000013846(St3gal1),ENSMUSG00000014773(Dll1),ENSMUSG00000015316(Slamf1),ENSMUSG00000016529(Il10),ENSMUSG00000017631(Abr),ENSMUSG00000017652(Cd40),ENSMUSG0000…	ENSMUSG00000000693(Loxl3),ENSMUSG00000000869(Il4),ENSMUSG00000005102(Eif2ak4),ENSMUSG00000005370(Msh6),ENSMUSG00000017550(Atad5),ENSMUSG00000017697(Ada),ENSMUSG00000018752(Tnfsfm13),ENSMUSG00000020399(Havcr2),ENSMUSG00000021356(Irf4),ENSMUSG00000024151(Msh2),ENSMUSG00000025880(Smad7),ENSMUSG00000026012(Cd28),ENSMUSG00000026842(Abl1),ENSMUSG00000027239(Mdk),ENSMUSG00000027947(Il6ra),ENSMUSG0000002…
BP	GO:0010558	negative regulation of macromolecule biosynthetic process	189	194	383	1578	2.57983e-11	9.67528e-10	ENSMUSG00000000317(Bcl6b),ENSMUSG00000000730(Dnmt3l),ENSMUSG00000000838(Fmr1),ENSMUSG00000001288(Rarg),ENSMUSG00000002111(Spi1),ENSMUSG00000002227(Mov10),ENSMUSG00000002307(Daxx),ENSMUSG00000002881(Nab1),ENSMUSG00000002983(Relb),ENSMUSG00000004040(Stat3),ENSMUSG00000005774(Rfx5),ENSMUSG00000007655(Cav1),ENSMUSG00000013415(Igf2bp1),ENSMUSG00000015605(Srf),ENSMUSG00000015837(Sqstm1),ENSMUSG00000015…	ENSMUSG00000000028(Cdc45),ENSMUSG00000000037(Scml2),ENSMUSG00000000282(Mnt),ENSMUSG00000000440(Pparg),ENSMUSG00000000693(Loxl3),ENSMUSG00000000869(Il4),ENSMUSG00000001228(Uhrf1),ENSMUSG00000001761(Smo),ENSMUSG00000002068(Ccne1),ENSMUSG00000004099(Dnmt1),ENSMUSG00000004698(Hdac9),ENSMUSG00000005102(Eif2ak4),ENSMUSG00000005583(Mef2c),ENSMUSG00000005718(Tfap4),ENSMUSG00000005893(Nr2c2),ENSMUSG000000…
BP	GO:0032943	mononuclear cell proliferation	68	35	103	307	2.65043e-11	9.91628e-10	ENSMUSG00000000732(Icosl),ENSMUSG00000001123(Lgals9),ENSMUSG00000003206(Ebi3),ENSMUSG00000004043(Stat5a),ENSMUSG00000004266(Ptpn6),ENSMUSG00000004296(Il12b),ENSMUSG00000004709(Cd244a),ENSMUSG00000014599(Csf1),ENSMUSG00000015316(Slamf1),ENSMUSG00000016496(Cd274),ENSMUSG00000016529(Il10),ENSMUSG00000017009(Sdc4),ENSMUSG00000017652(Cd40),ENSMUSG00000018899(Irf1),ENSMUSG00000020115(Tbk1),ENSMUSG00000…	ENSMUSG00000000869(Il4),ENSMUSG00000003882(Il7r),ENSMUSG00000005583(Mef2c),ENSMUSG00000017550(Atad5),ENSMUSG00000017697(Ada),ENSMUSG00000020101(Vsir),ENSMUSG00000020399(Havcr2),ENSMUSG00000021756(Il6st),ENSMUSG00000022885(St6gal1),ENSMUSG00000023915(Tnfrsf21),ENSMUSG00000023927(Satb1),ENSMUSG00000026012(Cd28),ENSMUSG00000026288(Inpp5d),ENSMUSG00000026842(Abl1),ENSMUSG00000027544(Nfatc2),ENSMUSG00…
BP	GO:0045893	positive regulation of transcription, DNA-templated	215	177	392	1622	2.67982e-11	9.9785e-10	ENSMUSG00000000078(Klf6),ENSMUSG00000000275(Trim25),ENSMUSG00000000441(Raf1),ENSMUSG00000000532(Acvr1b),ENSMUSG00000000982(Ccl3),ENSMUSG00000001288(Rarg),ENSMUSG00000001542(Ell2),ENSMUSG00000001627(Ifrd1),ENSMUSG00000001632(Brpf1),ENSMUSG00000001785(Pwp1),ENSMUSG00000002111(Spi1),ENSMUSG00000002307(Daxx),ENSMUSG00000002658(Gtf2f1),ENSMUSG00000002983(Relb),ENSMUSG00000004040(Stat3),ENSMUSG00000004…	ENSMUSG00000000440(Pparg),ENSMUSG00000000869(Il4),ENSMUSG00000001552(Jup),ENSMUSG00000001761(Smo),ENSMUSG00000002409(Dyrk1b),ENSMUSG00000003282(Plag1),ENSMUSG00000003575(Crtc1),ENSMUSG00000003992(Ssbp2),ENSMUSG00000004151(Etv1),ENSMUSG00000005583(Mef2c),ENSMUSG00000005718(Tfap4),ENSMUSG00000005893(Nr2c2),ENSMUSG00000006288(Ttc5),ENSMUSG00000008855(Hdac5),ENSMUSG00000010047(Hyal2),ENSMUSG000000145…
BP	GO:1903508	positive regulation of nucleic acid-templated transcription	215	177	392	1622	2.67982e-11	9.9785e-10	ENSMUSG00000000078(Klf6),ENSMUSG00000000275(Trim25),ENSMUSG00000000441(Raf1),ENSMUSG00000000532(Acvr1b),ENSMUSG00000000982(Ccl3),ENSMUSG00000001288(Rarg),ENSMUSG00000001542(Ell2),ENSMUSG00000001627(Ifrd1),ENSMUSG00000001632(Brpf1),ENSMUSG00000001785(Pwp1),ENSMUSG00000002111(Spi1),ENSMUSG00000002307(Daxx),ENSMUSG00000002658(Gtf2f1),ENSMUSG00000002983(Relb),ENSMUSG00000004040(Stat3),ENSMUSG00000004…	ENSMUSG00000000440(Pparg),ENSMUSG00000000869(Il4),ENSMUSG00000001552(Jup),ENSMUSG00000001761(Smo),ENSMUSG00000002409(Dyrk1b),ENSMUSG00000003282(Plag1),ENSMUSG00000003575(Crtc1),ENSMUSG00000003992(Ssbp2),ENSMUSG00000004151(Etv1),ENSMUSG00000005583(Mef2c),ENSMUSG00000005718(Tfap4),ENSMUSG00000005893(Nr2c2),ENSMUSG00000006288(Ttc5),ENSMUSG00000008855(Hdac5),ENSMUSG00000010047(Hyal2),ENSMUSG000000145…
BP	GO:0043069	negative regulation of programmed cell death	163	91	254	968	2.86786e-11	1.06533e-09	ENSMUSG00000000184(Ccnd2),ENSMUSG00000000441(Raf1),ENSMUSG00000000555(Itga5),ENSMUSG00000000915(Hip1r),ENSMUSG00000001288(Rarg),ENSMUSG00000002413(Braf),ENSMUSG00000002602(Axl),ENSMUSG00000003283(Hck),ENSMUSG00000003541(Ier3),ENSMUSG00000003849(Nqo1),ENSMUSG00000004043(Stat5a),ENSMUSG00000004221(Ikbkg),ENSMUSG00000004446(Bid),ENSMUSG00000004936(Map2k1),ENSMUSG00000005087(Cd44),ENSMUSG00000005413(…	ENSMUSG00000000282(Mnt),ENSMUSG00000000631(Myo18a),ENSMUSG00000000869(Il4),ENSMUSG00000001761(Smo),ENSMUSG00000002289(Angptl4),ENSMUSG00000003882(Il7r),ENSMUSG00000004099(Dnmt1),ENSMUSG00000005514(Por),ENSMUSG00000005583(Mef2c),ENSMUSG00000006235(Epor),ENSMUSG00000008305(Tle1),ENSMUSG00000010461(Eya4),ENSMUSG00000010751(Tnfrsf22),ENSMUSG00000013483(Card14),ENSMUSG00000014361(Mertk),ENSMUSG0000001…
BP	GO:1902680	positive regulation of RNA biosynthetic process	215	177	392	1623	2.92351e-11	1.08343e-09	ENSMUSG00000000078(Klf6),ENSMUSG00000000275(Trim25),ENSMUSG00000000441(Raf1),ENSMUSG00000000532(Acvr1b),ENSMUSG00000000982(Ccl3),ENSMUSG00000001288(Rarg),ENSMUSG00000001542(Ell2),ENSMUSG00000001627(Ifrd1),ENSMUSG00000001632(Brpf1),ENSMUSG00000001785(Pwp1),ENSMUSG00000002111(Spi1),ENSMUSG00000002307(Daxx),ENSMUSG00000002658(Gtf2f1),ENSMUSG00000002983(Relb),ENSMUSG00000004040(Stat3),ENSMUSG00000004…	ENSMUSG00000000440(Pparg),ENSMUSG00000000869(Il4),ENSMUSG00000001552(Jup),ENSMUSG00000001761(Smo),ENSMUSG00000002409(Dyrk1b),ENSMUSG00000003282(Plag1),ENSMUSG00000003575(Crtc1),ENSMUSG00000003992(Ssbp2),ENSMUSG00000004151(Etv1),ENSMUSG00000005583(Mef2c),ENSMUSG00000005718(Tfap4),ENSMUSG00000005893(Nr2c2),ENSMUSG00000006288(Ttc5),ENSMUSG00000008855(Hdac5),ENSMUSG00000010047(Hyal2),ENSMUSG000000145…
BP	GO:0045089	positive regulation of innate immune response	44	7	51	114	3.18775e-11	1.17856e-09	ENSMUSG00000000776(Polr3d),ENSMUSG00000001123(Lgals9),ENSMUSG00000004043(Stat5a),ENSMUSG00000004296(Il12b),ENSMUSG00000010358(Ifi35),ENSMUSG00000020115(Tbk1),ENSMUSG00000021270(Hsp90aa1),ENSMUSG00000021938(Pspc1),ENSMUSG00000022752(Tomm70a),ENSMUSG00000022906(Parp9),ENSMUSG00000024404(Riok3),ENSMUSG00000025058(Tasl),ENSMUSG00000025498(Irf7),ENSMUSG00000026535(Ifi202b),ENSMUSG00000026536(Ifi211),E…	ENSMUSG00000020399(Havcr2),ENSMUSG00000022471(Xrcc6),ENSMUSG00000022672(Prkdc),ENSMUSG00000024349(Sting1),ENSMUSG00000026187(Xrcc5),ENSMUSG00000035834(Polr3g),ENSMUSG00000039005(Tlr4)
BP	GO:1901575	organic substance catabolic process	249	213	462	1967	3.36463e-11	1.24102e-09	ENSMUSG00000000275(Trim25),ENSMUSG00000000628(Hk2),ENSMUSG00000001098(Kctd10),ENSMUSG00000001467(Cyp51),ENSMUSG00000002227(Mov10),ENSMUSG00000002847(Pla1a),ENSMUSG00000004040(Stat3),ENSMUSG00000005087(Cd44),ENSMUSG00000005413(Hmox1),ENSMUSG00000005686(Ampd3),ENSMUSG00000006418(Rnf114),ENSMUSG00000007036(Abhd16a),ENSMUSG00000007655(Cav1),ENSMUSG00000009630(Ppp2cb),ENSMUSG00000011305(Plin5),ENSMUSG…	ENSMUSG00000000149(Gna12),ENSMUSG00000000326(Comt),ENSMUSG00000001054(Rmnd5b),ENSMUSG00000001228(Uhrf1),ENSMUSG00000003484(Cyp4f18),ENSMUSG00000003623(Crot),ENSMUSG00000003809(Gcdh),ENSMUSG00000003812(Dnase2a),ENSMUSG00000004565(Pnpla6),ENSMUSG00000005043(Sgsh),ENSMUSG00000005447(Pafah1b3),ENSMUSG00000005682(Pan2),ENSMUSG00000006362(Cbfa2t3),ENSMUSG00000006611(Hfe),ENSMUSG00000007682(Dio2),ENSMUS…
BP	GO:0070371	ERK1 and ERK2 cascade	73	37	110	337	3.84127e-11	1.4135e-09	ENSMUSG00000000982(Ccl3),ENSMUSG00000002413(Braf),ENSMUSG00000004266(Ptpn6),ENSMUSG00000004936(Map2k1),ENSMUSG00000005087(Cd44),ENSMUSG00000007655(Cav1),ENSMUSG00000015316(Slamf1),ENSMUSG00000018930(Ccl4),ENSMUSG00000019122(Ccl9),ENSMUSG00000020122(Egfr),ENSMUSG00000020400(Tnip1),ENSMUSG00000021457(Syk),ENSMUSG00000021670(Hmgcr),ENSMUSG00000022285(Ywhaz),ENSMUSG00000022346(Myc),ENSMUSG00000022892…	ENSMUSG00000003518(Dusp3),ENSMUSG00000006235(Epor),ENSMUSG00000014158(Trpv4),ENSMUSG00000019768(Esr1),ENSMUSG00000019960(Dusp6),ENSMUSG00000020399(Havcr2),ENSMUSG00000020689(Itgb3),ENSMUSG00000021127(Zfp36l1),ENSMUSG00000021482(Prxl2c),ENSMUSG00000022114(Spry2),ENSMUSG00000023050(Map3k12),ENSMUSG00000024962(Vegfb),ENSMUSG00000025486(Sirt3),ENSMUSG00000025856(Pdgfa),ENSMUSG00000026228(Htr2b),ENSMU…
BP	GO:0071417	cellular response to organonitrogen compound	100	79	179	631	3.88109e-11	1.4248e-09	ENSMUSG00000004040(Stat3),ENSMUSG00000004043(Stat5a),ENSMUSG00000005057(Sh2b2),ENSMUSG00000007655(Cav1),ENSMUSG00000015340(Cybb),ENSMUSG00000015839(Nfe2l2),ENSMUSG00000017776(Crk),ENSMUSG00000018736(Ndel1),ENSMUSG00000018899(Irf1),ENSMUSG00000020122(Egfr),ENSMUSG00000020300(Cpeb4),ENSMUSG00000020572(Nampt),ENSMUSG00000020573(Pik3cg),ENSMUSG00000020599(Rgs9),ENSMUSG00000020671(Rab10),ENSMUSG000000…	ENSMUSG00000000440(Pparg),ENSMUSG00000001552(Jup),ENSMUSG00000004099(Dnmt1),ENSMUSG00000004698(Hdac9),ENSMUSG00000005514(Por),ENSMUSG00000005583(Mef2c),ENSMUSG00000015944(Castor2),ENSMUSG00000017146(Brca1),ENSMUSG00000020027(Socs2),ENSMUSG00000020091(Eif4ebp2),ENSMUSG00000020189(Osbpl8),ENSMUSG00000020263(Appl2),ENSMUSG00000020424(Castor1),ENSMUSG00000020546(Stxbp4),ENSMUSG00000020593(Lpin1),ENSM…
BP	GO:0060759	regulation of response to cytokine stimulus	43	11	54	125	4.43856e-11	1.62564e-09	ENSMUSG00000002602(Axl),ENSMUSG00000007655(Cav1),ENSMUSG00000014599(Csf1),ENSMUSG00000019471(Cdc37),ENSMUSG00000020115(Tbk1),ENSMUSG00000020227(Irak3),ENSMUSG00000020696(Rffl),ENSMUSG00000021109(Hif1a),ENSMUSG00000021367(Edn1),ENSMUSG00000021457(Syk),ENSMUSG00000022906(Parp9),ENSMUSG00000024379(Tslp),ENSMUSG00000024539(Ptpn2),ENSMUSG00000024901(Peli3),ENSMUSG00000025340(Rabgef1),ENSMUSG0000002549…	ENSMUSG00000000440(Pparg),ENSMUSG00000021756(Il6st),ENSMUSG00000023826(Prkn),ENSMUSG00000028927(Padi2),ENSMUSG00000031451(Gas6),ENSMUSG00000032586(Traip),ENSMUSG00000039005(Tlr4),ENSMUSG00000045382(Cxcr4),ENSMUSG00000047798(Cd300lf),ENSMUSG00000048249(Crebrf),ENSMUSG00000068854(H2bc21)
BP	GO:0016311	dephosphorylation	65	76	141	467	4.475e-11	1.63515e-09	ENSMUSG00000000409(Lck),ENSMUSG00000001175(Calm1),ENSMUSG00000001348(Acp5),ENSMUSG00000002103(Acp2),ENSMUSG00000004266(Ptpn6),ENSMUSG00000009630(Ppp2cb),ENSMUSG00000014956(Ppp1cb),ENSMUSG00000018559(Ctdnep1),ENSMUSG00000020120(Plek),ENSMUSG00000020271(Fbxw11),ENSMUSG00000020349(Ppp2ca),ENSMUSG00000020580(Rock2),ENSMUSG00000021759(Plpp1),ENSMUSG00000021948(Prkcd),ENSMUSG00000022052(Ppp2r2a),ENSMUS…	ENSMUSG00000000881(Dlg3),ENSMUSG00000002329(Mdp1),ENSMUSG00000003518(Dusp3),ENSMUSG00000005583(Mef2c),ENSMUSG00000010461(Eya4),ENSMUSG00000014592(Camta1),ENSMUSG00000015711(Prune1),ENSMUSG00000018669(Cdk5rap3),ENSMUSG00000019852(Arfgef3),ENSMUSG00000019960(Dusp6),ENSMUSG00000020032(Nuak1),ENSMUSG00000020593(Lpin1),ENSMUSG00000021009(Ptpn21),ENSMUSG00000021054(Sgpp1),ENSMUSG00000021768(Dusp13),ENS…
BP	GO:0018212	peptidyl-tyrosine modification	79	42	121	383	4.52017e-11	1.64781e-09	ENSMUSG00000000409(Lck),ENSMUSG00000000555(Itga5),ENSMUSG00000002602(Axl),ENSMUSG00000003283(Hck),ENSMUSG00000004043(Stat5a),ENSMUSG00000004266(Ptpn6),ENSMUSG00000004296(Il12b),ENSMUSG00000004936(Map2k1),ENSMUSG00000005087(Cd44),ENSMUSG00000007655(Cav1),ENSMUSG00000009376(Met),ENSMUSG00000017652(Cd40),ENSMUSG00000018899(Irf1),ENSMUSG00000018916(Csf2),ENSMUSG00000020122(Egfr),ENSMUSG00000021457(Sy…	ENSMUSG00000000869(Il4),ENSMUSG00000000881(Dlg3),ENSMUSG00000002409(Dyrk1b),ENSMUSG00000004933(Matk),ENSMUSG00000005958(Ephb3),ENSMUSG00000010047(Hyal2),ENSMUSG00000014361(Mertk),ENSMUSG00000019966(Kitl),ENSMUSG00000020623(Map2k6),ENSMUSG00000020689(Itgb3),ENSMUSG00000020888(Dvl2),ENSMUSG00000021756(Il6st),ENSMUSG00000022791(Tnk2),ENSMUSG00000024962(Vegfb),ENSMUSG00000025375(Aatk),ENSMUSG00000026…
BP	GO:0072676	lymphocyte migration	36	12	48	105	4.70481e-11	1.71113e-09	ENSMUSG00000000982(Ccl3),ENSMUSG00000001123(Lgals9),ENSMUSG00000017776(Crk),ENSMUSG00000018920(Cxcl16),ENSMUSG00000018930(Ccl4),ENSMUSG00000019122(Ccl9),ENSMUSG00000020272(Stk10),ENSMUSG00000020437(Myo1g),ENSMUSG00000022892(App),ENSMUSG00000023078(Cxcl13),ENSMUSG00000026166(Ccl20),ENSMUSG00000026700(Tnfsf4),ENSMUSG00000027009(Itga4),ENSMUSG00000027030(Stk39),ENSMUSG00000028539(Artn),ENSMUSG000000…	ENSMUSG00000020689(Itgb3),ENSMUSG00000022667(Cd200r1),ENSMUSG00000028927(Padi2),ENSMUSG00000031451(Gas6),ENSMUSG00000032754(Slc8b1),ENSMUSG00000036587(Fut7),ENSMUSG00000045092(S1pr1),ENSMUSG00000049103(Ccr2),ENSMUSG00000050232(Cxcr3),ENSMUSG00000051212(Gpr183),ENSMUSG00000052085(Dock8),ENSMUSG00000089876(Tmem102)
BP	GO:1903047	mitotic cell cycle process	84	103	187	668	4.81718e-11	1.74793e-09	ENSMUSG00000000184(Ccnd2),ENSMUSG00000000532(Acvr1b),ENSMUSG00000001175(Calm1),ENSMUSG00000001440(Kpnb1),ENSMUSG00000002233(Rhoc),ENSMUSG00000004266(Ptpn6),ENSMUSG00000004446(Bid),ENSMUSG00000005732(Ranbp1),ENSMUSG00000017291(Taok1),ENSMUSG00000017561(Crlf3),ENSMUSG00000018707(Dync1h1),ENSMUSG00000018736(Ndel1),ENSMUSG00000019923(Zwint),ENSMUSG00000019982(Myb),ENSMUSG00000020122(Egfr),ENSMUSG0000…	ENSMUSG00000000028(Cdc45),ENSMUSG00000002055(Spag5),ENSMUSG00000002068(Ccne1),ENSMUSG00000002870(Mcm2),ENSMUSG00000002871(Tpra1),ENSMUSG00000005233(Spc25),ENSMUSG00000005718(Tfap4),ENSMUSG00000006678(Pola1),ENSMUSG00000007080(Pole),ENSMUSG00000010051(Hyal1),ENSMUSG00000015766(Eps8),ENSMUSG00000017146(Brca1),ENSMUSG00000017550(Atad5),ENSMUSG00000018669(Cdk5rap3),ENSMUSG00000019768(Esr1),ENSMUSG000…
BP	GO:0030335	positive regulation of cell migration	105	56	161	554	5.14561e-11	1.86278e-09	ENSMUSG00000000532(Acvr1b),ENSMUSG00000000555(Itga5),ENSMUSG00000000957(Mmp14),ENSMUSG00000000982(Ccl3),ENSMUSG00000001123(Lgals9),ENSMUSG00000001435(Col18a1),ENSMUSG00000002233(Rhoc),ENSMUSG00000004040(Stat3),ENSMUSG00000004043(Stat5a),ENSMUSG00000004936(Map2k1),ENSMUSG00000005413(Hmox1),ENSMUSG00000006818(Sod2),ENSMUSG00000007655(Cav1),ENSMUSG00000009376(Met),ENSMUSG00000013076(Amotl1),ENSMUSG0…	ENSMUSG00000000869(Il4),ENSMUSG00000001227(Sema6b),ENSMUSG00000001761(Smo),ENSMUSG00000004698(Hdac9),ENSMUSG00000010051(Hyal1),ENSMUSG00000014158(Trpv4),ENSMUSG00000016933(Plcg1),ENSMUSG00000019773(Fbxo5),ENSMUSG00000019966(Kitl),ENSMUSG00000020101(Vsir),ENSMUSG00000020689(Itgb3),ENSMUSG00000021756(Il6st),ENSMUSG00000022114(Spry2),ENSMUSG00000022150(Dab2),ENSMUSG00000022367(Has2),ENSMUSG000000224…
BP	GO:0050777	negative regulation of immune response	46	17	63	157	5.21046e-11	1.8819e-09	ENSMUSG00000001123(Lgals9),ENSMUSG00000004266(Ptpn6),ENSMUSG00000004296(Il12b),ENSMUSG00000005413(Hmox1),ENSMUSG00000015316(Slamf1),ENSMUSG00000016529(Il10),ENSMUSG00000017631(Abr),ENSMUSG00000017776(Crk),ENSMUSG00000017830(Dhx58),ENSMUSG00000018899(Irf1),ENSMUSG00000019850(Tnfaip3),ENSMUSG00000020227(Irak3),ENSMUSG00000022026(Olfm4),ENSMUSG00000022876(Samsn1),ENSMUSG00000024339(Tap2),ENSMUSG0000…	ENSMUSG00000000440(Pparg),ENSMUSG00000000693(Loxl3),ENSMUSG00000000869(Il4),ENSMUSG00000003882(Il7r),ENSMUSG00000006611(Hfe),ENSMUSG00000020101(Vsir),ENSMUSG00000020399(Havcr2),ENSMUSG00000021253(Tgfb3),ENSMUSG00000025880(Smad7),ENSMUSG00000026288(Inpp5d),ENSMUSG00000032109(Nlrx1),ENSMUSG00000034652(Cd300a),ENSMUSG00000038147(Cd84),ENSMUSG00000039384(Dusp10),ENSMUSG00000049103(Ccr2),ENSMUSG000000…
BP	GO:0042098	T cell proliferation	53	23	76	205	5.50735e-11	1.98455e-09	ENSMUSG00000000732(Icosl),ENSMUSG00000001123(Lgals9),ENSMUSG00000003206(Ebi3),ENSMUSG00000004043(Stat5a),ENSMUSG00000004266(Ptpn6),ENSMUSG00000004296(Il12b),ENSMUSG00000004709(Cd244a),ENSMUSG00000015316(Slamf1),ENSMUSG00000016496(Cd274),ENSMUSG00000017009(Sdc4),ENSMUSG00000018899(Irf1),ENSMUSG00000020134(Peli1),ENSMUSG00000021457(Syk),ENSMUSG00000022901(Cd86),ENSMUSG00000025383(Il23a),ENSMUSG0000…	ENSMUSG00000000869(Il4),ENSMUSG00000020101(Vsir),ENSMUSG00000020399(Havcr2),ENSMUSG00000021756(Il6st),ENSMUSG00000023915(Tnfrsf21),ENSMUSG00000023927(Satb1),ENSMUSG00000026012(Cd28),ENSMUSG00000026842(Abl1),ENSMUSG00000027843(Ptpn22),ENSMUSG00000029468(P2rx7),ENSMUSG00000029869(Ephb6),ENSMUSG00000030365(Clec2i),ENSMUSG00000030528(Blm),ENSMUSG00000031101(Sash3),ENSMUSG00000031217(Efnb1),ENSMUSG000…
BP	GO:0018108	peptidyl-tyrosine phosphorylation	78	42	120	380	5.60497e-11	2.01508e-09	ENSMUSG00000000409(Lck),ENSMUSG00000000555(Itga5),ENSMUSG00000002602(Axl),ENSMUSG00000003283(Hck),ENSMUSG00000004043(Stat5a),ENSMUSG00000004266(Ptpn6),ENSMUSG00000004296(Il12b),ENSMUSG00000004936(Map2k1),ENSMUSG00000005087(Cd44),ENSMUSG00000007655(Cav1),ENSMUSG00000009376(Met),ENSMUSG00000017652(Cd40),ENSMUSG00000018899(Irf1),ENSMUSG00000018916(Csf2),ENSMUSG00000020122(Egfr),ENSMUSG00000021457(Sy…	ENSMUSG00000000869(Il4),ENSMUSG00000000881(Dlg3),ENSMUSG00000002409(Dyrk1b),ENSMUSG00000004933(Matk),ENSMUSG00000005958(Ephb3),ENSMUSG00000010047(Hyal2),ENSMUSG00000014361(Mertk),ENSMUSG00000019966(Kitl),ENSMUSG00000020623(Map2k6),ENSMUSG00000020689(Itgb3),ENSMUSG00000020888(Dvl2),ENSMUSG00000021756(Il6st),ENSMUSG00000022791(Tnk2),ENSMUSG00000024962(Vegfb),ENSMUSG00000025375(Aatk),ENSMUSG00000026…
BP	GO:0043066	negative regulation of apoptotic process	158	90	248	947	6.14615e-11	2.20458e-09	ENSMUSG00000000184(Ccnd2),ENSMUSG00000000441(Raf1),ENSMUSG00000000555(Itga5),ENSMUSG00000000915(Hip1r),ENSMUSG00000001288(Rarg),ENSMUSG00000002413(Braf),ENSMUSG00000002602(Axl),ENSMUSG00000003283(Hck),ENSMUSG00000003541(Ier3),ENSMUSG00000003849(Nqo1),ENSMUSG00000004043(Stat5a),ENSMUSG00000004221(Ikbkg),ENSMUSG00000004446(Bid),ENSMUSG00000004936(Map2k1),ENSMUSG00000005087(Cd44),ENSMUSG00000005413(…	ENSMUSG00000000282(Mnt),ENSMUSG00000000631(Myo18a),ENSMUSG00000000869(Il4),ENSMUSG00000001761(Smo),ENSMUSG00000002289(Angptl4),ENSMUSG00000003882(Il7r),ENSMUSG00000004099(Dnmt1),ENSMUSG00000005514(Por),ENSMUSG00000005583(Mef2c),ENSMUSG00000006235(Epor),ENSMUSG00000008305(Tle1),ENSMUSG00000010461(Eya4),ENSMUSG00000010751(Tnfrsf22),ENSMUSG00000013483(Card14),ENSMUSG00000014361(Mertk),ENSMUSG0000001…
BP	GO:0046635	positive regulation of alpha-beta T cell activation	24	10	34	62	6.36644e-11	2.27837e-09	ENSMUSG00000004296(Il12b),ENSMUSG00000004709(Cd244a),ENSMUSG00000015396(Cd83),ENSMUSG00000018899(Irf1),ENSMUSG00000019982(Myb),ENSMUSG00000021457(Syk),ENSMUSG00000025383(Il23a),ENSMUSG00000025746(Il6),ENSMUSG00000026395(Ptprc),ENSMUSG00000026700(Tnfsf4),ENSMUSG00000027776(Il12a),ENSMUSG00000031304(Il2rg),ENSMUSG00000031885(Cbfb),ENSMUSG00000032688(Malt1),ENSMUSG00000032691(Nlrp3),ENSMUSG000000353…	ENSMUSG00000017697(Ada),ENSMUSG00000026012(Cd28),ENSMUSG00000027843(Ptpn22),ENSMUSG00000030528(Blm),ENSMUSG00000031101(Sash3),ENSMUSG00000032440(Tgfbr2),ENSMUSG00000044813(Shb),ENSMUSG00000049103(Ccr2),ENSMUSG00000052142(Rasal3),ENSMUSG00000066687(Zbtb16)
BP	GO:0002709	regulation of T cell mediated immunity	26	10	36	68	6.79329e-11	2.42558e-09	ENSMUSG00000004296(Il12b),ENSMUSG00000015316(Slamf1),ENSMUSG00000020641(Rsad2),ENSMUSG00000024339(Tap2),ENSMUSG00000025383(Il23a),ENSMUSG00000025746(Il6),ENSMUSG00000026395(Ptprc),ENSMUSG00000026700(Tnfsf4),ENSMUSG00000026942(Traf2),ENSMUSG00000027398(Il1b),ENSMUSG00000027776(Il12a),ENSMUSG00000028599(Tnfrsf1b),ENSMUSG00000032688(Malt1),ENSMUSG00000032691(Nlrp3),ENSMUSG00000037447(Arid5a),ENSMUSG…	ENSMUSG00000003882(Il7r),ENSMUSG00000006611(Hfe),ENSMUSG00000020101(Vsir),ENSMUSG00000025880(Smad7),ENSMUSG00000026471(Mr1),ENSMUSG00000029468(P2rx7),ENSMUSG00000031101(Sash3),ENSMUSG00000036587(Fut7),ENSMUSG00000049103(Ccr2),ENSMUSG00000069255(Dusp22)
BP	GO:0006914	autophagy	63	66	129	419	7.23515e-11	2.5716e-09	ENSMUSG00000000628(Hk2),ENSMUSG00000001248(Gramd1a),ENSMUSG00000002845(Tmem39a),ENSMUSG00000004040(Stat3),ENSMUSG00000004221(Ikbkg),ENSMUSG00000004446(Bid),ENSMUSG00000004936(Map2k1),ENSMUSG00000005413(Hmox1),ENSMUSG00000005610(Eif4g2),ENSMUSG00000015837(Sqstm1),ENSMUSG00000016529(Il10),ENSMUSG00000018171(Vmp1),ENSMUSG00000019471(Cdc37),ENSMUSG00000019850(Tnfaip3),ENSMUSG00000020057(Dram1),ENSMUS…	ENSMUSG00000000869(Il4),ENSMUSG00000004768(Rab23),ENSMUSG00000004798(Ulk2),ENSMUSG00000005102(Eif2ak4),ENSMUSG00000017119(Nbr1),ENSMUSG00000019302(Atp6v0a1),ENSMUSG00000021619(Atg10),ENSMUSG00000022051(Bnip3l),ENSMUSG00000022750(Klhl22),ENSMUSG00000023826(Prkn),ENSMUSG00000023990(Tfeb),ENSMUSG00000024349(Sting1),ENSMUSG00000024413(Npc1),ENSMUSG00000026228(Htr2b),ENSMUSG00000026842(Abl1),ENSMUSG00…
BP	GO:0061919	process utilizing autophagic mechanism	63	66	129	419	7.23515e-11	2.5716e-09	ENSMUSG00000000628(Hk2),ENSMUSG00000001248(Gramd1a),ENSMUSG00000002845(Tmem39a),ENSMUSG00000004040(Stat3),ENSMUSG00000004221(Ikbkg),ENSMUSG00000004446(Bid),ENSMUSG00000004936(Map2k1),ENSMUSG00000005413(Hmox1),ENSMUSG00000005610(Eif4g2),ENSMUSG00000015837(Sqstm1),ENSMUSG00000016529(Il10),ENSMUSG00000018171(Vmp1),ENSMUSG00000019471(Cdc37),ENSMUSG00000019850(Tnfaip3),ENSMUSG00000020057(Dram1),ENSMUS…	ENSMUSG00000000869(Il4),ENSMUSG00000004768(Rab23),ENSMUSG00000004798(Ulk2),ENSMUSG00000005102(Eif2ak4),ENSMUSG00000017119(Nbr1),ENSMUSG00000019302(Atp6v0a1),ENSMUSG00000021619(Atg10),ENSMUSG00000022051(Bnip3l),ENSMUSG00000022750(Klhl22),ENSMUSG00000023826(Prkn),ENSMUSG00000023990(Tfeb),ENSMUSG00000024349(Sting1),ENSMUSG00000024413(Npc1),ENSMUSG00000026228(Htr2b),ENSMUSG00000026842(Abl1),ENSMUSG00…
BP	GO:1901652	response to peptide	103	51	154	526	7.43798e-11	2.6377e-09	ENSMUSG00000002413(Braf),ENSMUSG00000004040(Stat3),ENSMUSG00000004043(Stat5a),ENSMUSG00000005057(Sh2b2),ENSMUSG00000007655(Cav1),ENSMUSG00000014226(Cacybp),ENSMUSG00000015340(Cybb),ENSMUSG00000015839(Nfe2l2),ENSMUSG00000016529(Il10),ENSMUSG00000017652(Cd40),ENSMUSG00000017737(Mmp9),ENSMUSG00000017776(Crk),ENSMUSG00000018500(Adora2b),ENSMUSG00000018736(Ndel1),ENSMUSG00000018899(Irf1),ENSMUSG000000…	ENSMUSG00000000440(Pparg),ENSMUSG00000004698(Hdac9),ENSMUSG00000005514(Por),ENSMUSG00000010663(Fads1),ENSMUSG00000014158(Trpv4),ENSMUSG00000020027(Socs2),ENSMUSG00000020091(Eif4ebp2),ENSMUSG00000020189(Osbpl8),ENSMUSG00000020263(Appl2),ENSMUSG00000020546(Stxbp4),ENSMUSG00000020593(Lpin1),ENSMUSG00000020653(Klf11),ENSMUSG00000021127(Zfp36l1),ENSMUSG00000022546(Gpt),ENSMUSG00000022672(Prkdc),ENSMUS…
BP	GO:0042493	response to drug	167	130	297	1178	7.48038e-11	2.64673e-09	ENSMUSG00000000409(Lck),ENSMUSG00000000982(Ccl3),ENSMUSG00000001175(Calm1),ENSMUSG00000001663(Gstt1),ENSMUSG00000002111(Spi1),ENSMUSG00000002307(Daxx),ENSMUSG00000002413(Braf),ENSMUSG00000002602(Axl),ENSMUSG00000002997(Prkar2b),ENSMUSG00000003849(Nqo1),ENSMUSG00000004040(Stat3),ENSMUSG00000004902(Slc25a18),ENSMUSG00000005413(Hmox1),ENSMUSG00000005732(Ranbp1),ENSMUSG00000006818(Sod2),ENSMUSG000000…	ENSMUSG00000000149(Gna12),ENSMUSG00000000326(Comt),ENSMUSG00000000440(Pparg),ENSMUSG00000001552(Jup),ENSMUSG00000002346(Slc25a42),ENSMUSG00000003623(Crot),ENSMUSG00000004099(Dnmt1),ENSMUSG00000004698(Hdac9),ENSMUSG00000005514(Por),ENSMUSG00000005583(Mef2c),ENSMUSG00000005718(Tfap4),ENSMUSG00000006235(Epor),ENSMUSG00000008855(Hdac5),ENSMUSG00000011148(Adssl1),ENSMUSG00000015112(Slc25a13),ENSMUSG00…
BP	GO:0046651	lymphocyte proliferation	67	34	101	304	7.77601e-11	2.74512e-09	ENSMUSG00000000732(Icosl),ENSMUSG00000001123(Lgals9),ENSMUSG00000003206(Ebi3),ENSMUSG00000004043(Stat5a),ENSMUSG00000004266(Ptpn6),ENSMUSG00000004296(Il12b),ENSMUSG00000004709(Cd244a),ENSMUSG00000015316(Slamf1),ENSMUSG00000016496(Cd274),ENSMUSG00000016529(Il10),ENSMUSG00000017009(Sdc4),ENSMUSG00000017652(Cd40),ENSMUSG00000018899(Irf1),ENSMUSG00000020115(Tbk1),ENSMUSG00000020134(Peli1),ENSMUSG0000…	ENSMUSG00000000869(Il4),ENSMUSG00000003882(Il7r),ENSMUSG00000005583(Mef2c),ENSMUSG00000017550(Atad5),ENSMUSG00000017697(Ada),ENSMUSG00000020101(Vsir),ENSMUSG00000020399(Havcr2),ENSMUSG00000021756(Il6st),ENSMUSG00000023915(Tnfrsf21),ENSMUSG00000023927(Satb1),ENSMUSG00000026012(Cd28),ENSMUSG00000026288(Inpp5d),ENSMUSG00000026842(Abl1),ENSMUSG00000027544(Nfatc2),ENSMUSG00000027843(Ptpn22),ENSMUSG000…
BP	GO:0016070	RNA metabolic process	516	430	946	4454	8.11495e-11	2.85833e-09	ENSMUSG00000000078(Klf6),ENSMUSG00000000275(Trim25),ENSMUSG00000000317(Bcl6b),ENSMUSG00000000441(Raf1),ENSMUSG00000000532(Acvr1b),ENSMUSG00000000730(Dnmt3l),ENSMUSG00000000776(Polr3d),ENSMUSG00000000838(Fmr1),ENSMUSG00000000982(Ccl3),ENSMUSG00000001056(Nhp2),ENSMUSG00000001288(Rarg),ENSMUSG00000001305(Rrp15),ENSMUSG00000001542(Ell2),ENSMUSG00000001627(Ifrd1),ENSMUSG00000001632(Brpf1),ENSMUSG00000…	ENSMUSG00000000028(Cdc45),ENSMUSG00000000037(Scml2),ENSMUSG00000000282(Mnt),ENSMUSG00000000440(Pparg),ENSMUSG00000000693(Loxl3),ENSMUSG00000000869(Il4),ENSMUSG00000001228(Uhrf1),ENSMUSG00000001552(Jup),ENSMUSG00000001761(Smo),ENSMUSG00000002068(Ccne1),ENSMUSG00000002107(Celf2),ENSMUSG00000002409(Dyrk1b),ENSMUSG00000002486(Tchp),ENSMUSG00000002731(Prkra),ENSMUSG00000003282(Plag1),ENSMUSG0000000357…
BP	GO:0044092	negative regulation of molecular function	173	118	291	1151	8.5512e-11	3.00522e-09	ENSMUSG00000000983(Wfdc18),ENSMUSG00000001175(Calm1),ENSMUSG00000002658(Gtf2f1),ENSMUSG00000002997(Prkar2b),ENSMUSG00000003352(Cacnb3),ENSMUSG00000003849(Nqo1),ENSMUSG00000004266(Ptpn6),ENSMUSG00000004952(Rasa4),ENSMUSG00000005087(Cd44),ENSMUSG00000005413(Hmox1),ENSMUSG00000007655(Cav1),ENSMUSG00000009376(Met),ENSMUSG00000011305(Plin5),ENSMUSG00000014349(Ube2z),ENSMUSG00000015312(Gadd45b),ENSMUSG…	ENSMUSG00000000440(Pparg),ENSMUSG00000000881(Dlg3),ENSMUSG00000001761(Smo),ENSMUSG00000002289(Angptl4),ENSMUSG00000002870(Mcm2),ENSMUSG00000003452(Bicd1),ENSMUSG00000003518(Dusp3),ENSMUSG00000004530(Coro1c),ENSMUSG00000004698(Hdac9),ENSMUSG00000005102(Eif2ak4),ENSMUSG00000005514(Por),ENSMUSG00000005718(Tfap4),ENSMUSG00000006611(Hfe),ENSMUSG00000010047(Hyal2),ENSMUSG00000015702(Anxa9),ENSMUSG00000…
BP	GO:0046632	alpha-beta T cell differentiation	32	17	49	110	9.29903e-11	3.26071e-09	ENSMUSG00000002413(Braf),ENSMUSG00000002983(Relb),ENSMUSG00000004040(Stat3),ENSMUSG00000004296(Il12b),ENSMUSG00000015396(Cd83),ENSMUSG00000018899(Irf1),ENSMUSG00000019982(Myb),ENSMUSG00000020641(Rsad2),ENSMUSG00000021457(Syk),ENSMUSG00000025383(Il23a),ENSMUSG00000025746(Il6),ENSMUSG00000026700(Tnfsf4),ENSMUSG00000028064(Sema4a),ENSMUSG00000030067(Foxp1),ENSMUSG00000031154(Otud5),ENSMUSG0000003130…	ENSMUSG00000000693(Loxl3),ENSMUSG00000000869(Il4),ENSMUSG00000017697(Ada),ENSMUSG00000021356(Irf4),ENSMUSG00000023927(Satb1),ENSMUSG00000025880(Smad7),ENSMUSG00000026842(Abl1),ENSMUSG00000027947(Il6ra),ENSMUSG00000030528(Blm),ENSMUSG00000031101(Sash3),ENSMUSG00000032238(Rora),ENSMUSG00000032440(Tgfbr2),ENSMUSG00000036587(Fut7),ENSMUSG00000044813(Shb),ENSMUSG00000049103(Ccr2),ENSMUSG00000051212(Gp…
BP	GO:0050730	regulation of peptidyl-tyrosine phosphorylation	63	28	91	265	9.35277e-11	3.27222e-09	ENSMUSG00000000409(Lck),ENSMUSG00000000555(Itga5),ENSMUSG00000004266(Ptpn6),ENSMUSG00000004296(Il12b),ENSMUSG00000005087(Cd44),ENSMUSG00000007655(Cav1),ENSMUSG00000017652(Cd40),ENSMUSG00000018899(Irf1),ENSMUSG00000018916(Csf2),ENSMUSG00000020122(Egfr),ENSMUSG00000021457(Syk),ENSMUSG00000021892(Sh3bp5),ENSMUSG00000021948(Prkcd),ENSMUSG00000022831(Hcls1),ENSMUSG00000022876(Samsn1),ENSMUSG0000002289…	ENSMUSG00000000869(Il4),ENSMUSG00000000881(Dlg3),ENSMUSG00000010047(Hyal2),ENSMUSG00000019966(Kitl),ENSMUSG00000020689(Itgb3),ENSMUSG00000020888(Dvl2),ENSMUSG00000021756(Il6st),ENSMUSG00000024962(Vegfb),ENSMUSG00000026842(Abl1),ENSMUSG00000027843(Ptpn22),ENSMUSG00000027947(Il6ra),ENSMUSG00000028019(Pdgfc),ENSMUSG00000028086(Fbxw7),ENSMUSG00000028717(Tal1),ENSMUSG00000028864(Hgf),ENSMUSG0000002921…
[truncated: 15,192 more rows]
