# Supplementary material for: Transcriptomics and quantitative proteomics reveal changes after second stimulation of bone marrow-derived macrophages from lupus-prone MRL/lpr mice
Source: Front Immunol. 2022 Oct 19;13:1004232. doi: 10.3389/fimmu.2022.1004232 (PMC9627492; doi:10.3389/fimmu.2022.1004232)
Supplement: Supplementary file 7 [file Table_7.xlsx]

## Sheet: Sheet1
PathwayID	Pathway	Level1	Level2	Up_number	Down_number	DEG_number	total_number	Pvalue	FDR	Up_gene	Down_gene	URL
mmu04668	TNF signaling pathway	Environmental Information Processing	Signal transduction	60	8	68	108	7.44511e-23	2.33032e-20	ENSMUSG00000021936(Mapk8),ENSMUSG00000014599(Csf1),ENSMUSG00000000957(Mmp14),ENSMUSG00000024402(Lta),ENSMUSG00000012519(Mlkl),ENSMUSG00000048806(Ifnb1),ENSMUSG00000024401(Tnf),ENSMUSG00000004936(Map2k1),ENSMUSG00000057367(Birc2),ENSMUSG00000032000(Birc3),ENSMUSG00000055994(Nod2),ENSMUSG00000037405(Icam1),ENSMUSG00000004221(Ikbkg),ENSMUSG00000026031(Cflar),ENSMUSG00000024927(Rela),ENSMUSG000000242…	ENSMUSG00000031834(Pik3r2),ENSMUSG00000021250(Fos),ENSMUSG00000037316(Bag4),ENSMUSG00000022414(Tab1),ENSMUSG00000020623(Map2k6),ENSMUSG00000052684(Jun),ENSMUSG00000038648(Creb3l2),ENSMUSG00000031628(Casp3)	http://www.kegg.jp/kegg-bin/show_pathway?map04668/K06490%09%23FFFFFF,red/K03156%09%23FFFFFF,red/K12671%09%23FFFFFF,red/K05468%09%23FFFFFF,red/K06494%09%23FFFFFF,red/K05427%09%23FFFFFF,red/K10165%09%23FFFFFF,red/K10048%09%23FFFFFF,red/K04379%09%23FFFFFF,green/K09048%09%23FFFFFF,green/K04433%09%23FFFFFF,green/K09047%09%23FFFFFF,red/K05141%09%23FFFFFF,red/K09028%09%23FFFFFF,red/K03172%09%23FFFFFF,re…
mmu04621	NOD-like receptor signaling pathway	Organismal Systems	Immune system	65	13	78	167	2.10088e-15	2.48819e-13	ENSMUSG00000052776(Oas1a),ENSMUSG00000038058(Nod1),ENSMUSG00000021948(Prkcd),ENSMUSG00000042349(Ikbke),ENSMUSG00000021936(Mapk8),ENSMUSG00000048806(Ifnb1),ENSMUSG00000064289(Tank),ENSMUSG00000024401(Tnf),ENSMUSG00000040264(Gbp2b),ENSMUSG00000020572(Nampt),ENSMUSG00000057367(Birc2),ENSMUSG00000032000(Birc3),ENSMUSG00000032691(Nlrp3),ENSMUSG00000055994(Nod2),ENSMUSG00000047098(Rnf31),ENSMUSG0000000…	ENSMUSG00000024349(Sting1),ENSMUSG00000029468(P2rx7),ENSMUSG00000039005(Tlr4),ENSMUSG00000041849(Card6),ENSMUSG00000030102(Itpr1),ENSMUSG00000022414(Tab1),ENSMUSG00000040061(Plcb2),ENSMUSG00000042644(Itpr3),ENSMUSG00000066800(Rnasel),ENSMUSG00000029338(Antxr2),ENSMUSG00000052684(Jun),ENSMUSG00000070390(Nlrp1b),ENSMUSG00000032109(Nlrx1)	http://www.kegg.jp/kegg-bin/show_pathway?map04621/K04735%09%23FFFFFF,red/K05405%09%23FFFFFF,red/K12650%09%23FFFFFF,red/K14624%09%23FFFFFF,red/K04441%09%23FFFFFF,red/K20898%09%23FFFFFF,red/K02580%09%23FFFFFF,red/K20897%09%23FFFFFF,red/K12800%09%23FFFFFF,red/K05410%09%23FFFFFF,red/K05130%09%23FFFFFF,red/K11219%09%23FFFFFF,red/K04404%09%23FFFFFF,red/K05415%09%23FFFFFF,red/K09447%09%23FFFFFF,red/K112…
mmu05169	Epstein-Barr virus infection	Human Diseases	Infectious diseases: Viral	76	18	94	219	2.38485e-15	2.48819e-13	ENSMUSG00000040296(Ddx58),ENSMUSG00000037321(Tap1),ENSMUSG00000035692(Isg15),ENSMUSG00000067212(H2-T23),ENSMUSG00000024339(Tap2),ENSMUSG00000048806(Ifnb1),ENSMUSG00000024401(Tnf),ENSMUSG00000056116(H2-T22),ENSMUSG00000021832(Psmc6),ENSMUSG00000017428(Psmd11),ENSMUSG00000052776(Oas1a),ENSMUSG00000004040(Stat3),ENSMUSG00000039041(Adrm1),ENSMUSG00000026914(Psmd14),ENSMUSG00000042349(Ikbke),ENSMUSG00…	ENSMUSG00000031834(Pik3r2),ENSMUSG00000018983(E2f2),ENSMUSG00000002068(Ccne1),ENSMUSG00000048120(Entpd1),ENSMUSG00000021453(Gadd45g),ENSMUSG00000021668(Polk),ENSMUSG00000054115(Skp2),ENSMUSG00000028914(Casp9),ENSMUSG00000070348(Ccnd1),ENSMUSG00000022414(Tab1),ENSMUSG00000029478(Ncor2),ENSMUSG00000031628(Casp3),ENSMUSG00000022105(Rb1),ENSMUSG00000002109(Ddb2),ENSMUSG00000020623(Map2k6),ENSMUSG0000…	http://www.kegg.jp/kegg-bin/show_pathway?map05169/K02206%09%23FFFFFF,green/K11859%09%23FFFFFF,red/K03036%09%23FFFFFF,red/K04692%09%23FFFFFF,red/K03875%09%23FFFFFF,green/K03156%09%23FFFFFF,red/K02580%09%23FFFFFF,red/K09447%09%23FFFFFF,red/K02649%09%23FFFFFF,purple/K04734%09%23FFFFFF,red/K02091%09%23FFFFFF,red/K03038%09%23FFFFFF,red/K12671%09%23FFFFFF,red/K04729%09%23FFFFFF,red/K03030%09%23FFFFFF,r…
mmu05164	Influenza A	Human Diseases	Infectious diseases: Viral	66	9	75	171	4.17585e-13	3.2676e-11	ENSMUSG00000039304(Tnfsf10),ENSMUSG00000028163(Nfkb1),ENSMUSG00000021025(Nfkbia),ENSMUSG00000041417(Pik3r1),ENSMUSG00000027398(Il1b),ENSMUSG00000020115(Tbk1),ENSMUSG00000040033(Stat2),ENSMUSG00000026159(Agfg1),ENSMUSG00000000441(Raf1),ENSMUSG00000034855(Cxcl10),ENSMUSG00000024079(Eif2ak2),ENSMUSG00000053113(Socs3),ENSMUSG00000032508(Myd88),ENSMUSG00000025498(Irf7),ENSMUSG00000022074(Tnfrsf10b),EN…	ENSMUSG00000028914(Casp9),ENSMUSG00000052684(Jun),ENSMUSG00000020623(Map2k6),ENSMUSG00000066800(Rnasel),ENSMUSG00000005102(Eif2ak4),ENSMUSG00000032109(Nlrx1),ENSMUSG00000039005(Tlr4),ENSMUSG00000031834(Pik3r2),ENSMUSG00000023150(Ivns1abp)	http://www.kegg.jp/kegg-bin/show_pathway?map05164/K12671%09%23FFFFFF,red/K09447%09%23FFFFFF,red/K05415%09%23FFFFFF,red/K04693%09%23FFFFFF,red/K16195%09%23FFFFFF,red/K04447%09%23FFFFFF,red/K05130%09%23FFFFFF,red/K04734%09%23FFFFFF,red/K03237%09%23FFFFFF,red/K04696%09%23FFFFFF,red/K12646%09%23FFFFFF,red/K04735%09%23FFFFFF,red/K07211%09%23FFFFFF,red/K03283%09%23FFFFFF,red/K01370%09%23FFFFFF,red/K047…
mmu05168	Herpes simplex infection	Human Diseases	Infectious diseases: Viral	73	12	85	205	5.3375e-13	3.34127e-11	ENSMUSG00000024789(Jak2),ENSMUSG00000024334(H2-Oa),ENSMUSG00000024927(Rela),ENSMUSG00000022971(Ifnar2),ENSMUSG00000035929(H2-Q4),ENSMUSG00000036986(Pml),ENSMUSG00000004221(Ikbkg),ENSMUSG00000062300(Nectin2),ENSMUSG00000092243(Gm7030),ENSMUSG00000032661(Oas3),ENSMUSG00000063694(Cycs),ENSMUSG00000026104(Stat1),ENSMUSG00000021277(Traf3),ENSMUSG00000047123(Ticam1),ENSMUSG00000031712(Il15),ENSMUSG0000…	ENSMUSG00000021250(Fos),ENSMUSG00000005198(Polr2a),ENSMUSG00000023079(Gtf2ird1),ENSMUSG00000025358(Cdk2),ENSMUSG00000052684(Jun),ENSMUSG00000066800(Rnasel),ENSMUSG00000060261(Gtf2i),ENSMUSG00000005102(Eif2ak4),ENSMUSG00000031628(Casp3),ENSMUSG00000022414(Tab1),ENSMUSG00000054115(Skp2),ENSMUSG00000028957(Per3)	http://www.kegg.jp/kegg-bin/show_pathway?map05168/K10054%09%23FFFFFF,red/K04735%09%23FFFFFF,red/K04734%09%23FFFFFF,red/K04390%09%23FFFFFF,red/K05152%09%23FFFFFF,red/K16196%09%23FFFFFF,green/K06531%09%23FFFFFF,red/K04519%09%23FFFFFF,red/K05131%09%23FFFFFF,red/K04729%09%23FFFFFF,red/K05433%09%23FFFFFF,red/K04693%09%23FFFFFF,red/K05405%09%23FFFFFF,red/K05653%09%23FFFFFF,red/K05654%09%23FFFFFF,red/K1…
mmu05167	Kaposi's sarcoma-associated herpesvirus infection	Human Diseases	Infectious diseases: Viral	64	21	85	209	1.88694e-12	9.84356e-11	ENSMUSG00000024164(C3),ENSMUSG00000004040(Stat3),ENSMUSG00000016528(Mapkapk2),ENSMUSG00000042349(Ikbke),ENSMUSG00000021936(Mapk8),ENSMUSG00000035448(Ccr3),ENSMUSG00000044786(Zfp36),ENSMUSG00000067212(H2-T23),ENSMUSG00000056116(H2-T22),ENSMUSG00000004936(Map2k1),ENSMUSG00000048806(Ifnb1),ENSMUSG00000004221(Ikbkg),ENSMUSG00000022092(Ppp3cc),ENSMUSG00000037405(Icam1),ENSMUSG00000042228(Lyn),ENSMUSG0…	ENSMUSG00000043004(Gng2),ENSMUSG00000032192(Gnb5),ENSMUSG00000018983(E2f2),ENSMUSG00000031834(Pik3r2),ENSMUSG00000016933(Plcg1),ENSMUSG00000021250(Fos),ENSMUSG00000022667(Cd200r1),ENSMUSG00000021756(Il6st),ENSMUSG00000032766(Gng11),ENSMUSG00000030102(Itpr1),ENSMUSG00000028914(Casp9),ENSMUSG00000027544(Nfatc2),ENSMUSG00000070348(Ccnd1),ENSMUSG00000042644(Itpr3),ENSMUSG00000020623(Map2k6),ENSMUSG00…	http://www.kegg.jp/kegg-bin/show_pathway?map05167/K06625%09%23FFFFFF,red/K05405%09%23FFFFFF,red/K04536%09%23FFFFFF,red/K02580%09%23FFFFFF,red/K15308%09%23FFFFFF,red/K08268%09%23FFFFFF,red/K04399%09%23FFFFFF,green/K05131%09%23FFFFFF,red/K11220%09%23FFFFFF,red/K04692%09%23FFFFFF,red/K07211%09%23FFFFFF,red/K05413%09%23FFFFFF,red/K08893%09%23FFFFFF,red/K04441%09%23FFFFFF,red/K04735%09%23FFFFFF,red/K0…
mmu04657	IL-17 signaling pathway	Organismal Systems	Immune system	43	4	47	90	5.40549e-12	2.41703e-10	ENSMUSG00000024912(Fosl1),ENSMUSG00000024927(Rela),ENSMUSG00000053436(Mapk14),ENSMUSG00000026166(Ccl20),ENSMUSG00000004221(Ikbkg),ENSMUSG00000026942(Traf2),ENSMUSG00000019850(Tnfaip3),ENSMUSG00000056501(Cebpb),ENSMUSG00000022867(Usp25),ENSMUSG00000002897(Il17ra),ENSMUSG00000035352(Ccl12),ENSMUSG00000041620(Mmp1b),ENSMUSG00000053137(Mapk11),ENSMUSG00000029379(Cxcl3),ENSMUSG00000021277(Traf3),ENSMU…	ENSMUSG00000052684(Jun),ENSMUSG00000021250(Fos),ENSMUSG00000000869(Il4),ENSMUSG00000031628(Casp3)	http://www.kegg.jp/kegg-bin/show_pathway?map04657/K02187%09%23FFFFFF,green/K07210%09%23FFFFFF,red/K05410%09%23FFFFFF,red/K13088%09%23FFFFFF,red/K05423%09%23FFFFFF,red/K05509%09%23FFFFFF,red/K07994%09%23FFFFFF,red/K21083%09%23FFFFFF,red/K03156%09%23FFFFFF,red/K04379%09%23FFFFFF,green/K04502%09%23FFFFFF,red/K05427%09%23FFFFFF,red/K04448%09%23FFFFFF,green/K10048%09%23FFFFFF,red/K11849%09%23FFFFFF,re…
mmu05200	Pathways in cancer	Human Diseases	Cancers: Overview	100	68	168	528	1.16316e-11	4.55084e-10	ENSMUSG00000024927(Rela),ENSMUSG00000027878(Notch2),ENSMUSG00000024290(Rock1),ENSMUSG00000022346(Myc),ENSMUSG00000022971(Ifnar2),ENSMUSG00000036986(Pml),ENSMUSG00000035158(Mitf),ENSMUSG00000017057(Il13ra1),ENSMUSG00000024789(Jak2),ENSMUSG00000031155(Pim2),ENSMUSG00000002413(Braf),ENSMUSG00000048376(F2r),ENSMUSG00000006215(Zbtb17),ENSMUSG00000057367(Birc2),ENSMUSG00000026923(Notch1),ENSMUSG0000003…	ENSMUSG00000003882(Il7r),ENSMUSG00000001761(Smo),ENSMUSG00000021668(Polk),ENSMUSG00000021756(Il6st),ENSMUSG00000033318(Gstt2),ENSMUSG00000020888(Dvl2),ENSMUSG00000021453(Gadd45g),ENSMUSG00000021250(Fos),ENSMUSG00000015846(Rxra),ENSMUSG00000019966(Kitl),ENSMUSG00000000149(Gna12),ENSMUSG00000000869(Il4),ENSMUSG00000024140(Epas1),ENSMUSG00000002068(Ccne1),ENSMUSG00000032766(Gng11),ENSMUSG00000020647…	http://www.kegg.jp/kegg-bin/show_pathway?map05200/K06226%09%23FFFFFF,green/K02206%09%23FFFFFF,green/K16858%09%23FFFFFF,green/K04546%09%23FFFFFF,green/K02649%09%23FFFFFF,purple/K04390%09%23FFFFFF,red/K08530%09%23FFFFFF,green/K18806%09%23FFFFFF,green/K08732%09%23FFFFFF,red/K16060%09%23FFFFFF,red/K03914%09%23FFFFFF,red/K04440%09%23FFFFFF,red/K13241%09%23FFFFFF,red/K04735%09%23FFFFFF,red/K08734%09%23…
mmu04064	NF-kappa B signaling pathway	Environmental Information Processing	Signal transduction	40	7	47	92	1.5005e-11	5.21839e-10	ENSMUSG00000000409(Lck),ENSMUSG00000027398(Il1b),ENSMUSG00000028163(Nfkb1),ENSMUSG00000032041(Tirap),ENSMUSG00000021025(Nfkbia),ENSMUSG00000021457(Syk),ENSMUSG00000102037(Bcl2a1a),ENSMUSG00000018930(Ccl4),ENSMUSG00000026942(Traf2),ENSMUSG00000019850(Tnfaip3),ENSMUSG00000025779(Ly96),ENSMUSG00000024399(Ltb),ENSMUSG00000032508(Myd88),ENSMUSG00000051439(Cd14),ENSMUSG00000026875(Traf1),ENSMUSG0000000…	ENSMUSG00000022414(Tab1),ENSMUSG00000025507(Pidd1),ENSMUSG00000031497(Tnfsf13b),ENSMUSG00000013483(Card14),ENSMUSG00000036526(Card11),ENSMUSG00000039005(Tlr4),ENSMUSG00000016933(Plcg1)	http://www.kegg.jp/kegg-bin/show_pathway?map04064/K07210%09%23FFFFFF,red/K12964%09%23FFFFFF,red/K10652%09%23FFFFFF,red/K04469%09%23FFFFFF,red/K04403%09%23FFFFFF,green/K03160%09%23FFFFFF,red/K19662%09%23FFFFFF,red/K05403%09%23FFFFFF,red/K04519%09%23FFFFFF,red/K03172%09%23FFFFFF,red/K06527%09%23FFFFFF,red/K03157%09%23FFFFFF,red/K02580%09%23FFFFFF,red/K03174%09%23FFFFFF,red/K02162%09%23FFFFFF,red/K0…
mmu04620	Toll-like receptor signaling pathway	Organismal Systems	Immune system	43	6	49	99	2.46682e-11	7.72115e-10	ENSMUSG00000051498(Tlr6),ENSMUSG00000075122(Cd80),ENSMUSG00000025498(Irf7),ENSMUSG00000032508(Myd88),ENSMUSG00000024927(Rela),ENSMUSG00000051439(Cd14),ENSMUSG00000022971(Ifnar2),ENSMUSG00000024235(Map3k8),ENSMUSG00000004296(Il12b),ENSMUSG00000053436(Mapk14),ENSMUSG00000056130(Ticam2),ENSMUSG00000018930(Ccl4),ENSMUSG00000004221(Ikbkg),ENSMUSG00000022901(Cd86),ENSMUSG00000027776(Il12a),ENSMUSG00000…	ENSMUSG00000052684(Jun),ENSMUSG00000021250(Fos),ENSMUSG00000020623(Map2k6),ENSMUSG00000022414(Tab1),ENSMUSG00000039005(Tlr4),ENSMUSG00000031834(Pik3r2)	http://www.kegg.jp/kegg-bin/show_pathway?map04620/K05410%09%23FFFFFF,red/K02649%09%23FFFFFF,purple/K10169%09%23FFFFFF,red/K04735%09%23FFFFFF,red/K04403%09%23FFFFFF,green/K05413%09%23FFFFFF,red/K05412%09%23FFFFFF,red/K04404%09%23FFFFFF,red/K05842%09%23FFFFFF,red/K02580%09%23FFFFFF,red/K05131%09%23FFFFFF,red/K05403%09%23FFFFFF,red/K05130%09%23FFFFFF,red/K05408%09%23FFFFFF,red/K04379%09%23FFFFFF,gre…
mmu04380	Osteoclast differentiation	Organismal Systems	Development	44	11	55	123	2.23837e-10	6.36917e-09	ENSMUSG00000026942(Traf2),ENSMUSG00000052837(Junb),ENSMUSG00000024912(Fosl1),ENSMUSG00000053113(Socs3),ENSMUSG00000031257(Nox1),ENSMUSG00000063727(Tnfrsf11b),ENSMUSG00000032175(Tyk2),ENSMUSG00000038037(Socs1),ENSMUSG00000022967(Ifnar1),ENSMUSG00000053137(Mapk11),ENSMUSG00000027399(Il1a),ENSMUSG00000000409(Lck),ENSMUSG00000027398(Il1b),ENSMUSG00000041417(Pik3r1),ENSMUSG00000028163(Nfkb1),ENSMUSG00…	ENSMUSG00000020623(Map2k6),ENSMUSG00000052684(Jun),ENSMUSG00000059498(Fcgr3),ENSMUSG00000032440(Tgfbr2),ENSMUSG00000027544(Nfatc2),ENSMUSG00000022414(Tab1),ENSMUSG00000020689(Itgb3),ENSMUSG00000021250(Fos),ENSMUSG00000029217(Tec),ENSMUSG00000000440(Pparg),ENSMUSG00000031834(Pik3r2)	http://www.kegg.jp/kegg-bin/show_pathway?map04380/K02649%09%23FFFFFF,purple/K05148%09%23FFFFFF,red/K04693%09%23FFFFFF,red/K09030%09%23FFFFFF,red/K14381%09%23FFFFFF,red/K11220%09%23FFFFFF,red/K03156%09%23FFFFFF,red/K09253%09%23FFFFFF,red/K04441%09%23FFFFFF,red/K07361%09%23FFFFFF,red/K05131%09%23FFFFFF,red/K04379%09%23FFFFFF,green/K14379%09%23FFFFFF,red/K03173%09%23FFFFFF,red/K12560%09%23FFFFFF,red…
mmu05140	Leishmaniasis	Human Diseases	Infectious diseases: Parasitic	29	7	36	67	5.77303e-10	1.5058e-08	ENSMUSG00000024401(Tnf),ENSMUSG00000071715(Ncf4),ENSMUSG00000052889(Prkcb),ENSMUSG00000024164(C3),ENSMUSG00000026104(Stat1),ENSMUSG00000016529(Il10),ENSMUSG00000015755(Tab2),ENSMUSG00000025809(Itgb1),ENSMUSG00000053436(Mapk14),ENSMUSG00000024927(Rela),ENSMUSG00000024334(H2-Oa),ENSMUSG00000047945(Marcksl1),ENSMUSG00000024789(Jak2),ENSMUSG00000020826(Nos2),ENSMUSG00000027009(Itga4),ENSMUSG000000210…	ENSMUSG00000021253(Tgfb3),ENSMUSG00000039005(Tlr4),ENSMUSG00000000869(Il4),ENSMUSG00000021250(Fos),ENSMUSG00000022414(Tab1),ENSMUSG00000059498(Fcgr3),ENSMUSG00000052684(Jun)	http://www.kegg.jp/kegg-bin/show_pathway?map05140/K13377%09%23FFFFFF,green/K16824%09%23FFFFFF,green/K10160%09%23FFFFFF,green/K08012%09%23FFFFFF,red/K05430%09%23FFFFFF,green/K05697%09%23FFFFFF,red/K11987%09%23FFFFFF,red/K05425%09%23FFFFFF,red/K11220%09%23FFFFFF,red/K04734%09%23FFFFFF,red/K05719%09%23FFFFFF,red/K04441%09%23FFFFFF,red/K21421%09%23FFFFFF,red/K04447%09%23FFFFFF,red/K06483%09%23FFFFFF,…
mmu05162	Measles	Human Diseases	Infectious diseases: Viral	48	9	57	134	1.10324e-09	2.65626e-08	ENSMUSG00000026896(Ifih1),ENSMUSG00000004040(Stat3),ENSMUSG00000052776(Oas1a),ENSMUSG00000042349(Ikbke),ENSMUSG00000031304(Il2rg),ENSMUSG00000090877(Hspa1b),ENSMUSG00000040296(Ddx58),ENSMUSG00000021116(Eif2s1),ENSMUSG00000048806(Ifnb1),ENSMUSG00000024789(Jak2),ENSMUSG00000022971(Ifnar2),ENSMUSG00000024927(Rela),ENSMUSG00000004043(Stat5a),ENSMUSG00000031207(Msn),ENSMUSG00000015755(Tab2),ENSMUSG000…	ENSMUSG00000039005(Tlr4),ENSMUSG00000031834(Pik3r2),ENSMUSG00000002068(Ccne1),ENSMUSG00000000869(Il4),ENSMUSG00000026012(Cd28),ENSMUSG00000070348(Ccnd1),ENSMUSG00000025358(Cdk2),ENSMUSG00000005102(Eif2ak4),ENSMUSG00000002083(Bbc3)	http://www.kegg.jp/kegg-bin/show_pathway?map05162/K02091%09%23FFFFFF,red/K10159%09%23FFFFFF,red/K02206%09%23FFFFFF,green/K04722%09%23FFFFFF,red/K05131%09%23FFFFFF,red/K06470%09%23FFFFFF,green/K02649%09%23FFFFFF,purple/K12647%09%23FFFFFF,red/K10132%09%23FFFFFF,green/K07211%09%23FFFFFF,red/K10151%09%23FFFFFF,red/K03237%09%23FFFFFF,red/K12646%09%23FFFFFF,red/K05415%09%23FFFFFF,red/K12968%09%23FFFFFF…
mmu04625	C-type lectin receptor signaling pathway	Organismal Systems	Immune system	44	5	49	111	3.60865e-09	8.06792e-08	ENSMUSG00000025888(Casp1),ENSMUSG00000032487(Ptgs2),ENSMUSG00000025746(Il6),ENSMUSG00000053137(Mapk11),ENSMUSG00000028680(Plk3),ENSMUSG00000027776(Il12a),ENSMUSG00000053175(Bcl3),ENSMUSG00000001175(Calm1),ENSMUSG00000018899(Irf1),ENSMUSG00000004296(Il12b),ENSMUSG00000027646(Src),ENSMUSG00000021457(Syk),ENSMUSG00000043733(Ptpn11),ENSMUSG00000031780(Ccl17),ENSMUSG00000040033(Stat2),ENSMUSG000000004…	ENSMUSG00000052684(Jun),ENSMUSG00000042644(Itpr3),ENSMUSG00000027544(Nfatc2),ENSMUSG00000030102(Itpr1),ENSMUSG00000031834(Pik3r2)	http://www.kegg.jp/kegg-bin/show_pathway?map04625/K04441%09%23FFFFFF,red/K07368%09%23FFFFFF,red/K21095%09%23FFFFFF,red/K07210%09%23FFFFFF,red/K05426%09%23FFFFFF,red/K05855%09%23FFFFFF,red/K04469%09%23FFFFFF,red/K01370%09%23FFFFFF,red/K11987%09%23FFFFFF,red/K06068%09%23FFFFFF,red/K09444%09%23FFFFFF,red/K05704%09%23FFFFFF,red/K04735%09%23FFFFFF,red/K10058%09%23FFFFFF,red/K09258%09%23FFFFFF,red/K054…
mmu05145	Toxoplasmosis	Human Diseases	Infectious diseases: Parasitic	40	8	48	109	5.72774e-09	1.19519e-07	ENSMUSG00000090877(Hspa1b),ENSMUSG00000021936(Mapk8),ENSMUSG00000004040(Stat3),ENSMUSG00000024401(Tnf),ENSMUSG00000069874(Irgm2),ENSMUSG00000024927(Rela),ENSMUSG00000053436(Mapk14),ENSMUSG00000024334(H2-Oa),ENSMUSG00000024789(Jak2),ENSMUSG00000032000(Birc3),ENSMUSG00000057367(Birc2),ENSMUSG00000004221(Ikbkg),ENSMUSG00000063694(Cycs),ENSMUSG00000026104(Stat1),ENSMUSG00000078853(Igtp),ENSMUSG000000…	ENSMUSG00000024421(Lama3),ENSMUSG00000027111(Itga6),ENSMUSG00000021253(Tgfb3),ENSMUSG00000039005(Tlr4),ENSMUSG00000022414(Tab1),ENSMUSG00000028914(Casp9),ENSMUSG00000020623(Map2k6),ENSMUSG00000031628(Casp3)	http://www.kegg.jp/kegg-bin/show_pathway?map05145/K21289%09%23FFFFFF,red/K02187%09%23FFFFFF,green/K05425%09%23FFFFFF,red/K03160%09%23FFFFFF,red/K04433%09%23FFFFFF,green/K04735%09%23FFFFFF,red/K03283%09%23FFFFFF,red/K06752%09%23FFFFFF,red/K09565%09%23FFFFFF,red/K05400%09%23FFFFFF,red/K06240%09%23FFFFFF,green/K11219%09%23FFFFFF,red/K11220%09%23FFFFFF,red/K16060%09%23FFFFFF,red/K10159%09%23FFFFFF,re…
mmu05160	Hepatitis C	Human Diseases	Infectious diseases: Viral	52	10	62	159	1.26076e-08	2.46636e-07	ENSMUSG00000024401(Tnf),ENSMUSG00000004936(Map2k1),ENSMUSG00000048806(Ifnb1),ENSMUSG00000067297(Ifit1bl2),ENSMUSG00000021116(Eif2s1),ENSMUSG00000040296(Ddx58),ENSMUSG00000042349(Ikbke),ENSMUSG00000078652(Psme3),ENSMUSG00000052776(Oas1a),ENSMUSG00000004040(Stat3),ENSMUSG00000032661(Oas3),ENSMUSG00000063694(Cycs),ENSMUSG00000026104(Stat1),ENSMUSG00000021277(Traf3),ENSMUSG00000004446(Bid),ENSMUSG000…	ENSMUSG00000031834(Pik3r2),ENSMUSG00000018983(E2f2),ENSMUSG00000015846(Rxra),ENSMUSG00000070348(Ccnd1),ENSMUSG00000028914(Casp9),ENSMUSG00000005102(Eif2ak4),ENSMUSG00000022105(Rb1),ENSMUSG00000031628(Casp3),ENSMUSG00000025358(Cdk2),ENSMUSG00000066800(Rnasel)	http://www.kegg.jp/kegg-bin/show_pathway?map05160/K05842%09%23FFFFFF,red/K03237%09%23FFFFFF,red/K04366%09%23FFFFFF,red/K05401%09%23FFFFFF,red/K02649%09%23FFFFFF,purple/K03173%09%23FFFFFF,red/K16197%09%23FFFFFF,red/K14217%09%23FFFFFF,red/K11219%09%23FFFFFF,red/K16195%09%23FFFFFF,red/K15045%09%23FFFFFF,red/K04693%09%23FFFFFF,red/K04735%09%23FFFFFF,red/K04368%09%23FFFFFF,red/K14216%09%23FFFFFF,red/K…
mmu05206	MicroRNAs in cancer	Human Diseases	Cancers: Overview	34	22	56	140	2.20603e-08	4.0617e-07	ENSMUSG00000017737(Mmp9),ENSMUSG00000024238(Zeb1),ENSMUSG00000004936(Map2k1),ENSMUSG00000000441(Raf1),ENSMUSG00000030602(Pak4),ENSMUSG00000005413(Hmox1),ENSMUSG00000040274(Cdk6),ENSMUSG00000069662(Marcks),ENSMUSG00000013415(Igf2bp1),ENSMUSG00000000184(Ccnd2),ENSMUSG00000028163(Nfkb1),ENSMUSG00000023067(Cdkn1a),ENSMUSG00000026103(Gls),ENSMUSG00000009376(Met),ENSMUSG00000032477(Cdc25a),ENSMUSG00000…	ENSMUSG00000004099(Dnmt1),ENSMUSG00000016933(Plcg1),ENSMUSG00000020661(Dnmt3a),ENSMUSG00000038894(Irs2),ENSMUSG00000027478(Dnmt3b),ENSMUSG00000035109(Shc4),ENSMUSG00000055980(Irs1),ENSMUSG00000020689(Itgb3),ENSMUSG00000070348(Ccnd1),ENSMUSG00000018983(E2f2),ENSMUSG00000024975(Pdcd4),ENSMUSG00000025856(Pdgfa),ENSMUSG00000022114(Spry2),ENSMUSG00000017146(Brca1),ENSMUSG00000002068(Ccne1),ENSMUSG0000…	http://www.kegg.jp/kegg-bin/show_pathway?map05206/K06645%09%23FFFFFF,red/K06625%09%23FFFFFF,red/K11987%09%23FFFFFF,red/K06256%09%23FFFFFF,red/K17460%09%23FFFFFF,green/K04359%09%23FFFFFF,green/K01116%09%23FFFFFF,green/K04381%09%23FFFFFF,green/K04366%09%23FFFFFF,red/K09283%09%23FFFFFF,green/K04692%09%23FFFFFF,red/K04503%09%23FFFFFF,green/K04514%09%23FFFFFF,red/K17398%09%23FFFFFF,green/K06493%09%23F…
mmu05133	Pertussis	Human Diseases	Infectious diseases: Bacterial	31	5	36	76	4.58385e-08	7.9708e-07	ENSMUSG00000053436(Mapk14),ENSMUSG00000024927(Rela),ENSMUSG00000056130(Ticam2),ENSMUSG00000032691(Nlrp3),ENSMUSG00000016529(Il10),ENSMUSG00000047123(Ticam1),ENSMUSG00000025809(Itgb1),ENSMUSG00000025383(Il23a),ENSMUSG00000021936(Mapk8),ENSMUSG00000024164(C3),ENSMUSG00000038058(Nod1),ENSMUSG00000055172(C1ra),ENSMUSG00000024401(Tnf),ENSMUSG00000001175(Calm1),ENSMUSG00000032508(Myd88),ENSMUSG00000004…	ENSMUSG00000021250(Fos),ENSMUSG00000039005(Tlr4),ENSMUSG00000041515(Irf8),ENSMUSG00000052684(Jun),ENSMUSG00000031628(Casp3)	http://www.kegg.jp/kegg-bin/show_pathway?map05133/K05506%09%23FFFFFF,red/K08727%09%23FFFFFF,red/K04441%09%23FFFFFF,red/K05400%09%23FFFFFF,red/K04729%09%23FFFFFF,red/K09444%09%23FFFFFF,red/K05443%09%23FFFFFF,red/K04379%09%23FFFFFF,green/K01330%09%23FFFFFF,red/K04519%09%23FFFFFF,red/K05409%09%23FFFFFF,red/K03990%09%23FFFFFF,red/K10160%09%23FFFFFF,green/K06484%09%23FFFFFF,red/K12800%09%23FFFFFF,red/…
mmu05202	Transcriptional misregulation in cancer	Human Diseases	Cancers: Overview	37	27	64	174	9.94086e-08	1.63763e-06	ENSMUSG00000029313(Aff1),ENSMUSG00000056501(Cebpb),ENSMUSG00000025746(Il6),ENSMUSG00000035356(Nfkbiz),ENSMUSG00000026875(Traf1),ENSMUSG00000016559(H3f3b),ENSMUSG00000020275(Rel),ENSMUSG00000051439(Cd14),ENSMUSG00000015709(Arnt2),ENSMUSG00000030795(Fus),ENSMUSG00000015312(Gadd45b),ENSMUSG00000018916(Csf2),ENSMUSG00000017737(Mmp9),ENSMUSG00000102037(Bcl2a1a),ENSMUSG00000023067(Cdkn1a),ENSMUSG000000…	ENSMUSG00000032440(Tgfbr2),ENSMUSG00000019960(Dusp6),ENSMUSG00000028496(Mllt3),ENSMUSG00000034957(Cebpa),ENSMUSG00000027315(Spint1),ENSMUSG00000016087(Fli1),ENSMUSG00000002109(Ddb2),ENSMUSG00000031613(Hpgd),ENSMUSG00000024986(Hhex),ENSMUSG00000038954(Supt3),ENSMUSG00000034041(Lyl1),ENSMUSG00000005583(Mef2c),ENSMUSG00000025856(Pdgfa),ENSMUSG00000056758(Hmga2),ENSMUSG00000001552(Jup),ENSMUSG0000002…	http://www.kegg.jp/kegg-bin/show_pathway?map05202/K06067%09%23FFFFFF,red/K01403%09%23FFFFFF,red/K05099%09%23FFFFFF,red/K05427%09%23FFFFFF,red/K10054%09%23FFFFFF,red/K04391%09%23FFFFFF,red/K05096%09%23FFFFFF,red/K11449%09%23FFFFFF,green/K08524%09%23FFFFFF,green/K03211%09%23FFFFFF,red/K15605%09%23FFFFFF,red/K15589%09%23FFFFFF,red/K10500%09%23FFFFFF,red/K04735%09%23FFFFFF,red/K15184%09%23FFFFFF,red/…
mmu04062	Chemokine signaling pathway	Organismal Systems	Immune system	53	14	67	186	1.26627e-07	1.98171e-06	ENSMUSG00000004936(Map2k1),ENSMUSG00000037944(Ccr7),ENSMUSG00000029417(Cxcl9),ENSMUSG00000023078(Cxcl13),ENSMUSG00000028874(Fgr),ENSMUSG00000021948(Prkcd),ENSMUSG00000033220(Rac2),ENSMUSG00000019122(Ccl9),ENSMUSG00000035448(Ccr3),ENSMUSG00000004040(Stat3),ENSMUSG00000052889(Prkcb),ENSMUSG00000026104(Stat1),ENSMUSG00000020580(Rock2),ENSMUSG00000042249(Grk3),ENSMUSG00000029373(Pf4),ENSMUSG000000024…	ENSMUSG00000050232(Cxcr3),ENSMUSG00000048756(Foxo3),ENSMUSG00000031834(Pik3r2),ENSMUSG00000043004(Gng2),ENSMUSG00000032192(Gnb5),ENSMUSG00000020312(Shc2),ENSMUSG00000032766(Gng11),ENSMUSG00000045382(Cxcr4),ENSMUSG00000040061(Plcb2),ENSMUSG00000020654(Adcy3),ENSMUSG00000035109(Shc4),ENSMUSG00000049103(Ccr2),ENSMUSG00000048240(Gng7),ENSMUSG00000005580(Adcy9)	http://www.kegg.jp/kegg-bin/show_pathway?map04062/K12964%09%23FFFFFF,red/K05408%09%23FFFFFF,red/K11221%09%23FFFFFF,red/K04178%09%23FFFFFF,red/K19662%09%23FFFFFF,red/K05508%09%23FFFFFF,red/K07210%09%23FFFFFF,red/K04543%09%23FFFFFF,green/K04188%09%23FFFFFF,green/K04368%09%23FFFFFF,red/K21290%09%23FFFFFF,red/K05407%09%23FFFFFF,red/K04366%09%23FFFFFF,red/K14624%09%23FFFFFF,red/K21289%09%23FFFFFF,red/…
mmu05323	Rheumatoid arthritis	Human Diseases	Immune diseases	28	9	37	82	1.45165e-07	2.16366e-06	ENSMUSG00000001348(Acp5),ENSMUSG00000024334(H2-Oa),ENSMUSG00000037405(Icam1),ENSMUSG00000022901(Cd86),ENSMUSG00000000982(Ccl3),ENSMUSG00000030830(Itgal),ENSMUSG00000041620(Mmp1b),ENSMUSG00000039217(Il18),ENSMUSG00000031712(Il15),ENSMUSG00000025383(Il23a),ENSMUSG00000043613(Mmp3),ENSMUSG00000014599(Csf1),ENSMUSG00000024401(Tnf),ENSMUSG00000029648(Flt1),ENSMUSG00000024399(Ltb),ENSMUSG00000075122(Cd…	ENSMUSG00000028238(Atp6v0d2),ENSMUSG00000021250(Fos),ENSMUSG00000089669(Tnfsf13),ENSMUSG00000039005(Tlr4),ENSMUSG00000021253(Tgfb3),ENSMUSG00000052684(Jun),ENSMUSG00000026012(Cd28),ENSMUSG00000031497(Tnfsf13b),ENSMUSG00000019302(Atp6v0a1)	http://www.kegg.jp/kegg-bin/show_pathway?map05323/K05413%09%23FFFFFF,red/K05426%09%23FFFFFF,red/K05427%09%23FFFFFF,red/K14625%09%23FFFFFF,red/K05482%09%23FFFFFF,red/K02146%09%23FFFFFF,green/K05405%09%23FFFFFF,red/K06490%09%23FFFFFF,red/K10159%09%23FFFFFF,red/K05096%09%23FFFFFF,red/K12499%09%23FFFFFF,red/K01388%09%23FFFFFF,red/K03157%09%23FFFFFF,red/K02154%09%23FFFFFF,green/K05718%09%23FFFFFF,red/…
mmu04010	MAPK signaling pathway	Environmental Information Processing	Signal transduction	61	33	94	293	2.66047e-07	3.78513e-06	ENSMUSG00000015755(Tab2),ENSMUSG00000003352(Cacnb3),ENSMUSG00000032413(Rasa2),ENSMUSG00000024620(Pdgfrb),ENSMUSG00000027347(Rasgrp1),ENSMUSG00000020122(Egfr),ENSMUSG00000030203(Dusp16),ENSMUSG00000025225(Nfkb2),ENSMUSG00000023034(Nr4a1),ENSMUSG00000004221(Ikbkg),ENSMUSG00000022092(Ppp3cc),ENSMUSG00000024235(Map3k8),ENSMUSG00000002983(Relb),ENSMUSG00000053436(Mapk14),ENSMUSG00000024927(Rela),ENSMU…	ENSMUSG00000039384(Dusp10),ENSMUSG00000000149(Gna12),ENSMUSG00000021754(Map3k1),ENSMUSG00000028832(Stmn1),ENSMUSG00000020190(Mknk2),ENSMUSG00000037337(Map4k1),ENSMUSG00000021453(Gadd45g),ENSMUSG00000021250(Fos),ENSMUSG00000019966(Kitl),ENSMUSG00000028019(Pdgfc),ENSMUSG00000053716(Dusp7),ENSMUSG00000021253(Tgfb3),ENSMUSG00000023050(Map3k12),ENSMUSG00000031565(Fgfr1),ENSMUSG00000014426(Map3k4),ENSM…	http://www.kegg.jp/kegg-bin/show_pathway?map04010/K05098%09%23FFFFFF,green/K04426%09%23FFFFFF,red/K02308%09%23FFFFFF,red/K04407%09%23FFFFFF,red/K07836%09%23FFFFFF,red/K04428%09%23FFFFFF,green/K05096%09%23FFFFFF,red/K04402%09%23FFFFFF,purple/K16342%09%23FFFFFF,red/K09784%09%23FFFFFF,red/K05462%09%23FFFFFF,red/K04383%09%23FFFFFF,red/K04368%09%23FFFFFF,red/K04366%09%23FFFFFF,red/K04404%09%23FFFFFF,r…
mmu05161	Hepatitis B	Human Diseases	Infectious diseases: Viral	38	16	54	144	4.7504e-07	6.46467e-06	ENSMUSG00000026104(Stat1),ENSMUSG00000063694(Cycs),ENSMUSG00000047123(Ticam1),ENSMUSG00000004043(Stat5a),ENSMUSG00000024927(Rela),ENSMUSG00000022346(Myc),ENSMUSG00000004221(Ikbkg),ENSMUSG00000056130(Ticam2),ENSMUSG00000048806(Ifnb1),ENSMUSG00000004936(Map2k1),ENSMUSG00000024401(Tnf),ENSMUSG00000040296(Ddx58),ENSMUSG00000042349(Ikbke),ENSMUSG00000021936(Mapk8),ENSMUSG00000004040(Stat3),ENSMUSG0000…	ENSMUSG00000021754(Map3k1),ENSMUSG00000002068(Ccne1),ENSMUSG00000021250(Fos),ENSMUSG00000021253(Tgfb3),ENSMUSG00000031834(Pik3r2),ENSMUSG00000039005(Tlr4),ENSMUSG00000018983(E2f2),ENSMUSG00000031628(Casp3),ENSMUSG00000022105(Rb1),ENSMUSG00000038648(Creb3l2),ENSMUSG00000052684(Jun),ENSMUSG00000025358(Cdk2),ENSMUSG00000002109(Ddb2),ENSMUSG00000070348(Ccnd1),ENSMUSG00000027544(Nfatc2),ENSMUSG0000002…	http://www.kegg.jp/kegg-bin/show_pathway?map05161/K02091%09%23FFFFFF,red/K19662%09%23FFFFFF,red/K11223%09%23FFFFFF,red/K04440%09%23FFFFFF,red/K02649%09%23FFFFFF,purple/K01403%09%23FFFFFF,red/K11220%09%23FFFFFF,red/K06618%09%23FFFFFF,green/K04377%09%23FFFFFF,red/K04366%09%23FFFFFF,red/K07210%09%23FFFFFF,red/K05704%09%23FFFFFF,red/K05842%09%23FFFFFF,red/K04503%09%23FFFFFF,green/K04729%09%23FFFFFF,r…
mmu04933	AGE-RAGE signaling pathway in diabetic complications	Human Diseases	Endocrine and metabolic diseases	29	12	41	99	5.5131e-07	7.19001e-06	ENSMUSG00000024927(Rela),ENSMUSG00000053436(Mapk14),ENSMUSG00000024789(Jak2),ENSMUSG00000037405(Icam1),ENSMUSG00000024014(Pim1),ENSMUSG00000026104(Stat1),ENSMUSG00000004043(Stat5a),ENSMUSG00000021948(Prkcd),ENSMUSG00000021936(Mapk8),ENSMUSG00000052889(Prkcb),ENSMUSG00000004040(Stat3),ENSMUSG00000024401(Tnf),ENSMUSG00000031503(Col4a2),ENSMUSG00000031257(Nox1),ENSMUSG00000028128(F3),ENSMUSG00000053…	ENSMUSG00000074743(Thbd),ENSMUSG00000044167(Foxo1),ENSMUSG00000016933(Plcg1),ENSMUSG00000031834(Pik3r2),ENSMUSG00000021253(Tgfb3),ENSMUSG00000052684(Jun),ENSMUSG00000024962(Vegfb),ENSMUSG00000032440(Tgfbr2),ENSMUSG00000020937(Plcd3),ENSMUSG00000031628(Casp3),ENSMUSG00000070348(Ccnd1),ENSMUSG00000040061(Plcb2)	http://www.kegg.jp/kegg-bin/show_pathway?map04933/K04448%09%23FFFFFF,green/K02580%09%23FFFFFF,red/K01116%09%23FFFFFF,green/K11220%09%23FFFFFF,red/K11223%09%23FFFFFF,red/K04388%09%23FFFFFF,green/K03156%09%23FFFFFF,red/K21421%09%23FFFFFF,red/K08008%09%23FFFFFF,red/K02649%09%23FFFFFF,purple/K05857%09%23FFFFFF,green/K07201%09%23FFFFFF,green/K06237%09%23FFFFFF,red/K03982%09%23FFFFFF,red/K16858%09%23FF…
mmu05132	Salmonella infection	Human Diseases	Infectious diseases: Bacterial	26	7	33	75	1.36571e-06	1.70987e-05	ENSMUSG00000029580(Actb),ENSMUSG00000025278(Flnb),ENSMUSG00000021936(Mapk8),ENSMUSG00000020580(Rock2),ENSMUSG00000039217(Il18),ENSMUSG00000053436(Mapk14),ENSMUSG00000024290(Rock1),ENSMUSG00000024927(Rela),ENSMUSG00000073982(Rhog),ENSMUSG00000000982(Ccl3),ENSMUSG00000020826(Nos2),ENSMUSG00000018707(Dync1h1),ENSMUSG00000018916(Csf2),ENSMUSG00000058427(Cxcl2),ENSMUSG00000028163(Nfkb1),ENSMUSG0000002…	ENSMUSG00000027805(Pfn2),ENSMUSG00000039005(Tlr4),ENSMUSG00000003546(Klc4),ENSMUSG00000021250(Fos),ENSMUSG00000028917(Plekhm2),ENSMUSG00000052684(Jun),ENSMUSG00000052688(Rab7b)	http://www.kegg.jp/kegg-bin/show_pathway?map05132/K04383%09%23FFFFFF,red/K04437%09%23FFFFFF,red/K05405%09%23FFFFFF,red/K17388%09%23FFFFFF,red/K12964%09%23FFFFFF,red/K15348%09%23FFFFFF,green/K05759%09%23FFFFFF,green/K05505%09%23FFFFFF,red/K04448%09%23FFFFFF,green/K04379%09%23FFFFFF,green/K10407%09%23FFFFFF,green/K05408%09%23FFFFFF,red/K05482%09%23FFFFFF,red/K04519%09%23FFFFFF,red/K04735%09%23FFFFF…
mmu05222	Small cell lung cancer	Human Diseases	Cancers: Specific types	23	15	38	92	1.53086e-06	1.84291e-05	ENSMUSG00000073802(Cdkn2b),ENSMUSG00000040274(Cdk6),ENSMUSG00000020826(Nos2),ENSMUSG00000031503(Col4a2),ENSMUSG00000041417(Pik3r1),ENSMUSG00000021025(Nfkbia),ENSMUSG00000023067(Cdkn1a),ENSMUSG00000028163(Nfkb1),ENSMUSG00000032487(Ptgs2),ENSMUSG00000026875(Traf1),ENSMUSG00000025809(Itgb1),ENSMUSG00000021277(Traf3),ENSMUSG00000031502(Col4a1),ENSMUSG00000063694(Cycs),ENSMUSG00000057367(Birc2),ENSMUS…	ENSMUSG00000031834(Pik3r2),ENSMUSG00000054115(Skp2),ENSMUSG00000027111(Itga6),ENSMUSG00000028914(Casp9),ENSMUSG00000018983(E2f2),ENSMUSG00000070348(Ccnd1),ENSMUSG00000024421(Lama3),ENSMUSG00000031628(Casp3),ENSMUSG00000022105(Rb1),ENSMUSG00000002068(Ccne1),ENSMUSG00000021453(Gadd45g),ENSMUSG00000002109(Ddb2),ENSMUSG00000015846(Rxra),ENSMUSG00000021668(Polk),ENSMUSG00000025358(Cdk2)	http://www.kegg.jp/kegg-bin/show_pathway?map05222/K10500%09%23FFFFFF,red/K02091%09%23FFFFFF,red/K02206%09%23FFFFFF,green/K13241%09%23FFFFFF,red/K02187%09%23FFFFFF,green/K03173%09%23FFFFFF,red/K02649%09%23FFFFFF,purple/K02219%09%23FFFFFF,red/K10140%09%23FFFFFF,green/K03875%09%23FFFFFF,green/K04503%09%23FFFFFF,green/K05719%09%23FFFFFF,red/K06625%09%23FFFFFF,red/K06485%09%23FFFFFF,green/K07210%09%23…
mmu04060	Cytokine-cytokine receptor interaction	Environmental Information Processing	Signaling molecules and interaction	71	18	89	286	2.31702e-06	2.68603e-05	ENSMUSG00000038067(Csf3),ENSMUSG00000024402(Lta),ENSMUSG00000048806(Ifnb1),ENSMUSG00000037944(Ccr7),ENSMUSG00000024401(Tnf),ENSMUSG00000041324(Inhba),ENSMUSG00000044244(Il20rb),ENSMUSG00000016524(Il19),ENSMUSG00000035448(Ccr3),ENSMUSG00000019122(Ccl9),ENSMUSG00000031304(Il2rg),ENSMUSG00000014599(Csf1),ENSMUSG00000023078(Cxcl13),ENSMUSG00000029417(Cxcl9),ENSMUSG00000025383(Il23a),ENSMUSG0000002937…	ENSMUSG00000021253(Tgfb3),ENSMUSG00000027947(Il6ra),ENSMUSG00000089669(Tnfsf13),ENSMUSG00000050232(Cxcr3),ENSMUSG00000000869(Il4),ENSMUSG00000023915(Tnfrsf21),ENSMUSG00000003882(Il7r),ENSMUSG00000021756(Il6st),ENSMUSG00000045382(Cxcr4),ENSMUSG00000031497(Tnfsf13b),ENSMUSG00000001741(Il16),ENSMUSG00000097328(Tnfsf12),ENSMUSG00000061393(Acvr2b),ENSMUSG00000006235(Epor),ENSMUSG00000054263(Lifr),ENSM…	http://www.kegg.jp/kegg-bin/show_pathway?map04060/K03160%09%23FFFFFF,red/K04519%09%23FFFFFF,red/K12964%09%23FFFFFF,red/K05476%09%23FFFFFF,green/K05481%09%23FFFFFF,red/K04388%09%23FFFFFF,green/K05444%09%23FFFFFF,red/K12671%09%23FFFFFF,red/K04390%09%23FFFFFF,red/K05407%09%23FFFFFF,red/K05072%09%23FFFFFF,green/K04721%09%23FFFFFF,red/K05058%09%23FFFFFF,green/K05145%09%23FFFFFF,red/K05068%09%23FFFFFF,…
mmu05142	Chagas disease (American trypanosomiasis)	Human Diseases	Infectious diseases: Parasitic	33	7	40	101	2.92634e-06	3.27123e-05	ENSMUSG00000024778(Fas),ENSMUSG00000027776(Il12a),ENSMUSG00000032508(Myd88),ENSMUSG00000020349(Ppp2ca),ENSMUSG00000004296(Il12b),ENSMUSG00000035385(Ccl2),ENSMUSG00000005763(Cd247),ENSMUSG00000025746(Il6),ENSMUSG00000035352(Ccl12),ENSMUSG00000035042(Ccl5),ENSMUSG00000053137(Mapk11),ENSMUSG00000024639(Gnaq),ENSMUSG00000041417(Pik3r1),ENSMUSG00000027398(Il1b),ENSMUSG00000037411(Serpine1),ENSMUSG0000…	ENSMUSG00000052684(Jun),ENSMUSG00000032440(Tgfbr2),ENSMUSG00000040061(Plcb2),ENSMUSG00000021250(Fos),ENSMUSG00000039005(Tlr4),ENSMUSG00000031834(Pik3r2),ENSMUSG00000021253(Tgfb3)	http://www.kegg.jp/kegg-bin/show_pathway?map05142/K05405%09%23FFFFFF,red/K04354%09%23FFFFFF,red/K04379%09%23FFFFFF,green/K13241%09%23FFFFFF,red/K04734%09%23FFFFFF,red/K05858%09%23FFFFFF,green/K05408%09%23FFFFFF,red/K07210%09%23FFFFFF,red/K10160%09%23FFFFFF,green/K04729%09%23FFFFFF,red/K14624%09%23FFFFFF,red/K04735%09%23FFFFFF,red/K04388%09%23FFFFFF,green/K04519%09%23FFFFFF,red/K13377%09%23FFFFFF,…
mmu05205	Proteoglycans in cancer	Human Diseases	Cancers: Overview	45	19	64	195	9.06099e-06	9.77963e-05	ENSMUSG00000020122(Egfr),ENSMUSG00000046223(Plaur),ENSMUSG00000022346(Myc),ENSMUSG00000024290(Rock1),ENSMUSG00000053436(Mapk14),ENSMUSG00000052397(Ezr),ENSMUSG00000002413(Braf),ENSMUSG00000025809(Itgb1),ENSMUSG00000031207(Msn),ENSMUSG00000005087(Cd44),ENSMUSG00000020580(Rock2),ENSMUSG00000052889(Prkcb),ENSMUSG00000022831(Hcls1),ENSMUSG00000004040(Stat3),ENSMUSG00000007655(Cav1),ENSMUSG00000025278…	ENSMUSG00000001761(Smo),ENSMUSG00000031714(Gab1),ENSMUSG00000030102(Itpr1),ENSMUSG00000005718(Tfap4),ENSMUSG00000024975(Pdcd4),ENSMUSG00000031565(Fgfr1),ENSMUSG00000031834(Pik3r2),ENSMUSG00000039005(Tlr4),ENSMUSG00000016933(Plcg1),ENSMUSG00000021820(Camk2g),ENSMUSG00000019768(Esr1),ENSMUSG00000031628(Casp3),ENSMUSG00000022817(Itgb5),ENSMUSG00000035273(Hpse),ENSMUSG00000028864(Hgf),ENSMUSG00000070…	http://www.kegg.jp/kegg-bin/show_pathway?map05205/K08107%09%23FFFFFF,red/K10159%09%23FFFFFF,red/K05692%09%23FFFFFF,red/K05704%09%23FFFFFF,red/K01116%09%23FFFFFF,green/K09108%09%23FFFFFF,green/K04368%09%23FFFFFF,red/K16338%09%23FFFFFF,red/K07293%09%23FFFFFF,red/K04692%09%23FFFFFF,red/K02649%09%23FFFFFF,purple/K05697%09%23FFFFFF,red/K05460%09%23FFFFFF,green/K01403%09%23FFFFFF,red/K09593%09%23FFFFFF…
mmu05418	Fluid shear stress and atherosclerosis	Human Diseases	Cardiovascular diseases	37	13	50	142	9.95684e-06	0.000103883	ENSMUSG00000037405(Icam1),ENSMUSG00000004221(Ikbkg),ENSMUSG00000024927(Rela),ENSMUSG00000053436(Mapk14),ENSMUSG00000015837(Sqstm1),ENSMUSG00000005413(Hmox1),ENSMUSG00000024401(Tnf),ENSMUSG00000026021(Sumo1),ENSMUSG00000015839(Nfe2l2),ENSMUSG00000029580(Actb),ENSMUSG00000007655(Cav1),ENSMUSG00000021936(Mapk8),ENSMUSG00000033220(Rac2),ENSMUSG00000035385(Ccl2),ENSMUSG00000021270(Hsp90aa1),ENSMUSG000…	ENSMUSG00000074743(Thbd),ENSMUSG00000021250(Fos),ENSMUSG00000033318(Gstt2),ENSMUSG00000014158(Trpv4),ENSMUSG00000031834(Pik3r2),ENSMUSG00000001665(Gstt3),ENSMUSG00000020623(Map2k6),ENSMUSG00000052684(Jun),ENSMUSG00000062960(Kdr),ENSMUSG00000025856(Pdgfa),ENSMUSG00000061393(Acvr2b),ENSMUSG00000005583(Mef2c),ENSMUSG00000020689(Itgb3)	http://www.kegg.jp/kegg-bin/show_pathway?map05418/K12160%09%23FFFFFF,red/K04433%09%23FFFFFF,green/K04448%09%23FFFFFF,green/K00510%09%23FFFFFF,red/K00355%09%23FFFFFF,red/K08008%09%23FFFFFF,red/K04519%09%23FFFFFF,red/K04735%09%23FFFFFF,red/K02580%09%23FFFFFF,red/K05704%09%23FFFFFF,red/K06527%09%23FFFFFF,red/K02183%09%23FFFFFF,red/K14624%09%23FFFFFF,red/K06257%09%23FFFFFF,red/K05692%09%23FFFFFF,red/…
mmu04210	Apoptosis	Cellular Processes	Cell growth and death	33	15	48	135	1.10284e-05	0.000111351	ENSMUSG00000062825(Actg1),ENSMUSG00000026875(Traf1),ENSMUSG00000022074(Tnfrsf10b),ENSMUSG00000024778(Fas),ENSMUSG00000026942(Traf2),ENSMUSG00000015312(Gadd45b),ENSMUSG00000071369(Map3k5),ENSMUSG00000000441(Raf1),ENSMUSG00000102037(Bcl2a1a),ENSMUSG00000039304(Tnfsf10),ENSMUSG00000028163(Nfkb1),ENSMUSG00000026883(Dab2ip),ENSMUSG00000021025(Nfkbia),ENSMUSG00000041417(Pik3r1),ENSMUSG00000025076(Casp7…	ENSMUSG00000002083(Bbc3),ENSMUSG00000027997(Casp6),ENSMUSG00000024590(Lmnb1),ENSMUSG00000068329(Htra2),ENSMUSG00000031628(Casp3),ENSMUSG00000052684(Jun),ENSMUSG00000042644(Itpr3),ENSMUSG00000025507(Pidd1),ENSMUSG00000029863(Casp2),ENSMUSG00000028914(Casp9),ENSMUSG00000030102(Itpr1),ENSMUSG00000029027(Dffb),ENSMUSG00000021250(Fos),ENSMUSG00000021453(Gadd45g),ENSMUSG00000031834(Pik3r2)	http://www.kegg.jp/kegg-bin/show_pathway?map04210/K04399%09%23FFFFFF,green/K03173%09%23FFFFFF,red/K02580%09%23FFFFFF,red/K04390%09%23FFFFFF,red/K08569%09%23FFFFFF,red/K04721%09%23FFFFFF,red/K04426%09%23FFFFFF,red/K04402%09%23FFFFFF,purple/K04397%09%23FFFFFF,red/K04735%09%23FFFFFF,red/K04726%09%23FFFFFF,red/K02311%09%23FFFFFF,green/K04734%09%23FFFFFF,red/K06114%09%23FFFFFF,red/K02187%09%23FFFFFF,g…
mmu05134	Legionellosis	Human Diseases	Infectious diseases: Bacterial	23	3	26	58	1.17223e-05	0.000114659	ENSMUSG00000032508(Myd88),ENSMUSG00000051439(Cd14),ENSMUSG00000004296(Il12b),ENSMUSG00000027776(Il12a),ENSMUSG00000029379(Cxcl3),ENSMUSG00000025888(Casp1),ENSMUSG00000091971(Hspa1a),ENSMUSG00000029380(Cxcl1),ENSMUSG00000025746(Il6),ENSMUSG00000027995(Tlr2),ENSMUSG00000028163(Nfkb1),ENSMUSG00000021025(Nfkbia),ENSMUSG00000048076(Arf1),ENSMUSG00000025076(Casp7),ENSMUSG00000027398(Il1b),ENSMUSG000000…	ENSMUSG00000031628(Casp3),ENSMUSG00000028914(Casp9),ENSMUSG00000039005(Tlr4)	http://www.kegg.jp/kegg-bin/show_pathway?map05134/K05425%09%23FFFFFF,red/K10160%09%23FFFFFF,green/K04729%09%23FFFFFF,red/K05405%09%23FFFFFF,red/K04469%09%23FFFFFF,red/K05505%09%23FFFFFF,red/K01370%09%23FFFFFF,red/K04399%09%23FFFFFF,green/K08738%09%23FFFFFF,red/K02187%09%23FFFFFF,green/K05482%09%23FFFFFF,red/K04734%09%23FFFFFF,red/K10159%09%23FFFFFF,red/K04391%09%23FFFFFF,red/K07937%09%23FFFFFF,re…
mmu04015	Rap1 signaling pathway	Environmental Information Processing	Signal transduction	41	26	67	209	1.35952e-05	0.000128949	ENSMUSG00000038387(Rras),ENSMUSG00000009376(Met),ENSMUSG00000041417(Pik3r1),ENSMUSG00000039844(Rapgef1),ENSMUSG00000026821(Ralgds),ENSMUSG00000027646(Src),ENSMUSG00000034101(Ctnnd1),ENSMUSG00000049929(Lpar4),ENSMUSG00000035954(Dock4),ENSMUSG00000003070(Efna2),ENSMUSG00000000441(Raf1),ENSMUSG00000062232(Rapgef2),ENSMUSG00000001175(Calm1),ENSMUSG00000017776(Crk),ENSMUSG00000062825(Actg1),ENSMUSG000…	ENSMUSG00000025856(Pdgfa),ENSMUSG00000028864(Hgf),ENSMUSG00000041351(Rap1gap),ENSMUSG00000001995(Sipa1l2),ENSMUSG00000020689(Itgb3),ENSMUSG00000020654(Adcy3),ENSMUSG00000040061(Plcb2),ENSMUSG00000067714(Lpar5),ENSMUSG00000071042(Rasgrp3),ENSMUSG00000062960(Kdr),ENSMUSG00000042745(Id1),ENSMUSG00000020623(Map2k6),ENSMUSG00000024962(Vegfb),ENSMUSG00000005580(Adcy9),ENSMUSG00000022469(Rapgef3),ENSMUS…	http://www.kegg.jp/kegg-bin/show_pathway?map04015/K05462%09%23FFFFFF,red/K05692%09%23FFFFFF,red/K04275%09%23FFFFFF,red/K04267%09%23FFFFFF,red/K01116%09%23FFFFFF,green/K17698%09%23FFFFFF,red/K17700%09%23FFFFFF,green/K07829%09%23FFFFFF,red/K04266%09%23FFFFFF,red/K06274%09%23FFFFFF,red/K07361%09%23FFFFFF,red/K05461%09%23FFFFFF,green/K04441%09%23FFFFFF,red/K02649%09%23FFFFFF,purple/K19662%09%23FFFFFF…
mmu05152	Tuberculosis	Human Diseases	Infectious diseases: Bacterial	50	9	59	178	1.42678e-05	0.000131348	ENSMUSG00000024164(C3),ENSMUSG00000060477(Irak2),ENSMUSG00000021936(Mapk8),ENSMUSG00000030142(Clec4e),ENSMUSG00000032688(Malt1),ENSMUSG00000018334(Ksr1),ENSMUSG00000024401(Tnf),ENSMUSG00000036499(Eea1),ENSMUSG00000048806(Ifnb1),ENSMUSG00000055994(Nod2),ENSMUSG00000022092(Ppp3cc),ENSMUSG00000044827(Tlr1),ENSMUSG00000051498(Tlr6),ENSMUSG00000024789(Jak2),ENSMUSG00000024334(H2-Oa),ENSMUSG00000053436…	ENSMUSG00000039005(Tlr4),ENSMUSG00000021253(Tgfb3),ENSMUSG00000028238(Atp6v0d2),ENSMUSG00000028914(Casp9),ENSMUSG00000019302(Atp6v0a1),ENSMUSG00000021820(Camk2g),ENSMUSG00000056216(Cebpg),ENSMUSG00000059498(Fcgr3),ENSMUSG00000031628(Casp3)	http://www.kegg.jp/kegg-bin/show_pathway?map05152/K04519%09%23FFFFFF,red/K02146%09%23FFFFFF,green/K05704%09%23FFFFFF,red/K05398%09%23FFFFFF,red/K05855%09%23FFFFFF,red/K04440%09%23FFFFFF,red/K10165%09%23FFFFFF,red/K05443%09%23FFFFFF,red/K12478%09%23FFFFFF,red/K10169%09%23FFFFFF,red/K05482%09%23FFFFFF,red/K11220%09%23FFFFFF,red/K10048%09%23FFFFFF,red/K08065%09%23FFFFFF,red/K04447%09%23FFFFFF,red/K1…
mmu04622	RIG-I-like receptor signaling pathway	Organismal Systems	Immune system	26	3	29	70	2.40778e-05	0.000215325	ENSMUSG00000027776(Il12a),ENSMUSG00000026942(Traf2),ENSMUSG00000030595(Nfkbib),ENSMUSG00000004296(Il12b),ENSMUSG00000025498(Irf7),ENSMUSG00000000275(Trim25),ENSMUSG00000053137(Mapk11),ENSMUSG00000017830(Dhx58),ENSMUSG00000028163(Nfkb1),ENSMUSG00000021025(Nfkbia),ENSMUSG00000034855(Cxcl10),ENSMUSG00000020115(Tbk1),ENSMUSG00000004221(Ikbkg),ENSMUSG00000024927(Rela),ENSMUSG00000053436(Mapk14),ENSMUS…	ENSMUSG00000032109(Nlrx1),ENSMUSG00000021754(Map3k1),ENSMUSG00000024349(Sting1)	http://www.kegg.jp/kegg-bin/show_pathway?map04622/K03174%09%23FFFFFF,red/K04735%09%23FFFFFF,red/K04734%09%23FFFFFF,red/K05406%09%23FFFFFF,red/K12159%09%23FFFFFF,red/K12646%09%23FFFFFF,red/K04440%09%23FFFFFF,red/K10652%09%23FFFFFF,red/K04441%09%23FFFFFF,red/K05425%09%23FFFFFF,red/K12647%09%23FFFFFF,red/K12649%09%23FFFFFF,red/K03173%09%23FFFFFF,red/K12650%09%23FFFFFF,red/K07211%09%23FFFFFF,red/K126…
mmu04659	Th17 cell differentiation	Organismal Systems	Immune system	27	11	38	102	2.68296e-05	0.000233269	ENSMUSG00000030595(Nfkbib),ENSMUSG00000023947(Nfkbie),ENSMUSG00000053137(Mapk11),ENSMUSG00000032175(Tyk2),ENSMUSG00000021109(Hif1a),ENSMUSG00000005763(Cd247),ENSMUSG00000021270(Hsp90aa1),ENSMUSG00000073421(H2-Ab1),ENSMUSG00000025746(Il6),ENSMUSG00000028163(Nfkb1),ENSMUSG00000021025(Nfkbia),ENSMUSG00000000409(Lck),ENSMUSG00000027398(Il1b),ENSMUSG00000026770(Il2ra),ENSMUSG00000024789(Jak2),ENSMUSG0…	ENSMUSG00000052684(Jun),ENSMUSG00000032440(Tgfbr2),ENSMUSG00000021356(Irf4),ENSMUSG00000027544(Nfatc2),ENSMUSG00000021756(Il6st),ENSMUSG00000021250(Fos),ENSMUSG00000015846(Rxra),ENSMUSG00000000869(Il4),ENSMUSG00000016933(Plcg1),ENSMUSG00000027947(Il6ra),ENSMUSG00000032238(Rora)	http://www.kegg.jp/kegg-bin/show_pathway?map04659/K04519%09%23FFFFFF,red/K05872%09%23FFFFFF,red/K04388%09%23FFFFFF,green/K04379%09%23FFFFFF,green/K04079%09%23FFFFFF,red/K05426%09%23FFFFFF,red/K04734%09%23FFFFFF,red/K11223%09%23FFFFFF,red/K05405%09%23FFFFFF,red/K05055%09%23FFFFFF,green/K02580%09%23FFFFFF,red/K05060%09%23FFFFFF,green/K04447%09%23FFFFFF,red/K04440%09%23FFFFFF,red/K04692%09%23FFFFFF,…
mmu05144	Malaria	Human Diseases	Infectious diseases: Parasitic	20	4	24	54	3.00448e-05	0.000254163	ENSMUSG00000039217(Il18),ENSMUSG00000090523(Gypc),ENSMUSG00000030830(Itgal),ENSMUSG00000017652(Cd40),ENSMUSG00000016529(Il10),ENSMUSG00000037405(Icam1),ENSMUSG00000030149(Klrk1),ENSMUSG00000038067(Csf3),ENSMUSG00000024401(Tnf),ENSMUSG00000035385(Ccl2),ENSMUSG00000025746(Il6),ENSMUSG00000026582(Sele),ENSMUSG00000035352(Ccl12),ENSMUSG00000027962(Vcam1),ENSMUSG00000027776(Il12a),ENSMUSG00000032508(M…	ENSMUSG00000039005(Tlr4),ENSMUSG00000021253(Tgfb3),ENSMUSG00000040249(Lrp1),ENSMUSG00000028864(Hgf)	http://www.kegg.jp/kegg-bin/show_pathway?map05144/K05406%09%23FFFFFF,red/K04550%09%23FFFFFF,green/K05482%09%23FFFFFF,red/K05443%09%23FFFFFF,red/K05423%09%23FFFFFF,red/K06490%09%23FFFFFF,red/K05460%09%23FFFFFF,green/K13377%09%23FFFFFF,green/K10159%09%23FFFFFF,red/K04519%09%23FFFFFF,red/K05718%09%23FFFFFF,red/K10160%09%23FFFFFF,green/K05405%09%23FFFFFF,red/K06494%09%23FFFFFF,red/K06527%09%23FFFFFF,…
mmu04630	Jak-STAT signaling pathway	Environmental Information Processing	Signal transduction	43	12	55	167	3.35994e-05	0.000276753	ENSMUSG00000024539(Ptpn2),ENSMUSG00000022967(Ifnar1),ENSMUSG00000031289(Il13ra2),ENSMUSG00000038037(Socs1),ENSMUSG00000004266(Ptpn6),ENSMUSG00000032175(Tyk2),ENSMUSG00000025746(Il6),ENSMUSG00000053113(Socs3),ENSMUSG00000004296(Il12b),ENSMUSG00000032578(Cish),ENSMUSG00000027776(Il12a),ENSMUSG00000034394(Lif),ENSMUSG00000018916(Csf2),ENSMUSG00000043733(Ptpn11),ENSMUSG00000040033(Stat2),ENSMUSG00000…	ENSMUSG00000054263(Lifr),ENSMUSG00000056153(Socs6),ENSMUSG00000028101(Pias3),ENSMUSG00000006235(Epor),ENSMUSG00000070348(Ccnd1),ENSMUSG00000025856(Pdgfa),ENSMUSG00000000869(Il4),ENSMUSG00000003882(Il7r),ENSMUSG00000021756(Il6st),ENSMUSG00000027947(Il6ra),ENSMUSG00000020027(Socs2),ENSMUSG00000031834(Pik3r2)	http://www.kegg.jp/kegg-bin/show_pathway?map04630/K18026%09%23FFFFFF,red/K05076%09%23FFFFFF,red/K11223%09%23FFFFFF,red/K05130%09%23FFFFFF,red/K05433%09%23FFFFFF,red/K05131%09%23FFFFFF,red/K10151%09%23FFFFFF,red/K11219%09%23FFFFFF,red/K05406%09%23FFFFFF,red/K05068%09%23FFFFFF,red/K05415%09%23FFFFFF,red/K05443%09%23FFFFFF,red/K05074%09%23FFFFFF,red/K05426%09%23FFFFFF,red/K05079%09%23FFFFFF,green/K0…
mmu04660	T cell receptor signaling pathway	Organismal Systems	Immune system	27	10	37	100	4.04945e-05	0.000322713	ENSMUSG00000024927(Rela),ENSMUSG00000024235(Map3k8),ENSMUSG00000053436(Mapk14),ENSMUSG00000022092(Ppp3cc),ENSMUSG00000004221(Ikbkg),ENSMUSG00000027347(Rasgrp1),ENSMUSG00000016529(Il10),ENSMUSG00000032475(Nck1),ENSMUSG00000028191(Bcl10),ENSMUSG00000026285(Pdcd1),ENSMUSG00000024401(Tnf),ENSMUSG00000004936(Map2k1),ENSMUSG00000026395(Ptprc),ENSMUSG00000002699(Lcp2),ENSMUSG00000030602(Pak4),ENSMUSG000…	ENSMUSG00000021250(Fos),ENSMUSG00000029217(Tec),ENSMUSG00000000869(Il4),ENSMUSG00000016933(Plcg1),ENSMUSG00000036526(Card11),ENSMUSG00000031834(Pik3r2),ENSMUSG00000052684(Jun),ENSMUSG00000042351(Grap2),ENSMUSG00000026012(Cd28),ENSMUSG00000027544(Nfatc2)	http://www.kegg.jp/kegg-bin/show_pathway?map04660/K17332%09%23FFFFFF,green/K02581%09%23FFFFFF,red/K04379%09%23FFFFFF,green/K06478%09%23FFFFFF,red/K07369%09%23FFFFFF,red/K07210%09%23FFFFFF,red/K06470%09%23FFFFFF,green/K07367%09%23FFFFFF,green/K02580%09%23FFFFFF,red/K07364%09%23FFFFFF,green/K06744%09%23FFFFFF,red/K04734%09%23FFFFFF,red/K07361%09%23FFFFFF,red/K05734%09%23FFFFFF,red/K07368%09%23FFFFF…
mmu04218	Cellular senescence	Cellular Processes	Cell growth and death	35	21	56	172	4.12413e-05	0.000322713	ENSMUSG00000014956(Ppp1cb),ENSMUSG00000025746(Il6),ENSMUSG00000027399(Il1a),ENSMUSG00000053137(Mapk11),ENSMUSG00000015312(Gadd45b),ENSMUSG00000001175(Calm1),ENSMUSG00000061232(H2-K1),ENSMUSG00000073802(Cdkn2b),ENSMUSG00000040274(Cdk6),ENSMUSG00000008892(Vdac3),ENSMUSG00000019842(Traf3ip2),ENSMUSG00000000441(Raf1),ENSMUSG00000038387(Rras),ENSMUSG00000041417(Pik3r1),ENSMUSG00000037411(Serpine1),ENS…	ENSMUSG00000022105(Rb1),ENSMUSG00000032440(Tgfbr2),ENSMUSG00000020623(Map2k6),ENSMUSG00000025358(Cdk2),ENSMUSG00000021127(Zfp36l1),ENSMUSG00000042644(Itpr3),ENSMUSG00000015968(Cacna1d),ENSMUSG00000027544(Nfatc2),ENSMUSG00000045817(Zfp36l2),ENSMUSG00000070348(Ccnd1),ENSMUSG00000002068(Ccne1),ENSMUSG00000030102(Itpr1),ENSMUSG00000021453(Gadd45g),ENSMUSG00000029521(Chek2),ENSMUSG00000031834(Pik3r2),…	http://www.kegg.jp/kegg-bin/show_pathway?map04218/K04388%09%23FFFFFF,green/K02183%09%23FFFFFF,red/K04685%09%23FFFFFF,red/K09408%09%23FFFFFF,green/K02580%09%23FFFFFF,red/K04441%09%23FFFFFF,red/K13377%09%23FFFFFF,green/K02091%09%23FFFFFF,red/K04377%09%23FFFFFF,red/K04383%09%23FFFFFF,red/K06645%09%23FFFFFF,red/K04973%09%23FFFFFF,green/K06626%09%23FFFFFF,green/K07208%09%23FFFFFF,red/K17332%09%23FFFFF…
mmu04662	B cell receptor signaling pathway	Organismal Systems	Immune system	21	7	28	69	5.1759e-05	0.000395136	ENSMUSG00000025491(Ifitm1),ENSMUSG00000004266(Ptpn6),ENSMUSG00000023947(Nfkbie),ENSMUSG00000030595(Nfkbib),ENSMUSG00000000441(Raf1),ENSMUSG00000028459(Cd72),ENSMUSG00000026656(Fcgr2b),ENSMUSG00000021457(Syk),ENSMUSG00000021025(Nfkbia),ENSMUSG00000028163(Nfkb1),ENSMUSG00000041417(Pik3r1),ENSMUSG00000028191(Bcl10),ENSMUSG00000024927(Rela),ENSMUSG00000004221(Ikbkg),ENSMUSG00000042228(Lyn),ENSMUSG000…	ENSMUSG00000052684(Jun),ENSMUSG00000071042(Rasgrp3),ENSMUSG00000027544(Nfatc2),ENSMUSG00000026288(Inpp5d),ENSMUSG00000021250(Fos),ENSMUSG00000031834(Pik3r2),ENSMUSG00000036526(Card11)	http://www.kegg.jp/kegg-bin/show_pathway?map04662/K04448%09%23FFFFFF,green/K04368%09%23FFFFFF,red/K04366%09%23FFFFFF,red/K02581%09%23FFFFFF,red/K19831%09%23FFFFFF,red/K05854%09%23FFFFFF,red/K07210%09%23FFFFFF,red/K02580%09%23FFFFFF,red/K04734%09%23FFFFFF,red/K04735%09%23FFFFFF,red/K03084%09%23FFFFFF,green/K06504%09%23FFFFFF,red/K05697%09%23FFFFFF,red/K07860%09%23FFFFFF,red/K05855%09%23FFFFFF,red/…
mmu03050	Proteasome	Genetic Information Processing	Folding, sorting and degradation	20	1	21	46	5.75575e-05	0.000426638	ENSMUSG00000078153(Psme2b),ENSMUSG00000015671(Psma2),ENSMUSG00000079197(Psme2),ENSMUSG00000096727(Psmb9),ENSMUSG00000022216(Psme1),ENSMUSG00000018286(Psmb6),ENSMUSG00000039067(Psmd7),ENSMUSG00000031897(Psmb10),ENSMUSG00000022193(Psmb5),ENSMUSG00000021024(Psma6),ENSMUSG00000026914(Psmd14),ENSMUSG00000078652(Psme3),ENSMUSG00000021832(Psmc6),ENSMUSG00000017428(Psmd11),ENSMUSG00000039041(Adrm1),ENSMU…	ENSMUSG00000036743(Psma8)	http://www.kegg.jp/kegg-bin/show_pathway?map03050/K03064%09%23FFFFFF,red/K02741%09%23FFFFFF,red/K02740%09%23FFFFFF,red/K02726%09%23FFFFFF,red/K03036%09%23FFFFFF,red/K02727%09%23FFFFFF,red/K02733%09%23FFFFFF,red/K02738%09%23FFFFFF,red/K06696%09%23FFFFFF,red/K03061%09%23FFFFFF,red/K02731%09%23FFFFFF,green/K02730%09%23FFFFFF,red/K06697%09%23FFFFFF,red/K06691%09%23FFFFFF,red/K02737%09%23FFFFFF,red/K0…
mmu04658	Th1 and Th2 cell differentiation	Organismal Systems	Immune system	28	5	33	87	5.86116e-05	0.000426638	ENSMUSG00000024334(H2-Oa),ENSMUSG00000024789(Jak2),ENSMUSG00000030595(Nfkbib),ENSMUSG00000024927(Rela),ENSMUSG00000027878(Notch2),ENSMUSG00000023947(Nfkbie),ENSMUSG00000053436(Mapk14),ENSMUSG00000004296(Il12b),ENSMUSG00000022092(Ppp3cc),ENSMUSG00000004221(Ikbkg),ENSMUSG00000026923(Notch1),ENSMUSG00000027776(Il12a),ENSMUSG00000053137(Mapk11),ENSMUSG00000026104(Stat1),ENSMUSG00000032175(Tyk2),ENSMU…	ENSMUSG00000052684(Jun),ENSMUSG00000021250(Fos),ENSMUSG00000000869(Il4),ENSMUSG00000027544(Nfatc2),ENSMUSG00000016933(Plcg1)	http://www.kegg.jp/kegg-bin/show_pathway?map04658/K05430%09%23FFFFFF,green/K11219%09%23FFFFFF,red/K06052%09%23FFFFFF,red/K04348%09%23FFFFFF,red/K01116%09%23FFFFFF,green/K04379%09%23FFFFFF,green/K05856%09%23FFFFFF,red/K05070%09%23FFFFFF,red/K04448%09%23FFFFFF,green/K02599%09%23FFFFFF,red/K20994%09%23FFFFFF,red/K04734%09%23FFFFFF,red/K06051%09%23FFFFFF,red/K06061%09%23FFFFFF,red/K06752%09%23FFFFFF,…
mmu04330	Notch signaling pathway	Environmental Information Processing	Signal transduction	12	11	23	55	0.000137792	0.000980206	ENSMUSG00000014773(Dll1),ENSMUSG00000031925(Maml2),ENSMUSG00000004947(Dtx2),ENSMUSG00000027276(Jag1),ENSMUSG00000052593(Adam17),ENSMUSG00000032375(Aph1b),ENSMUSG00000049502(Dtx3l),ENSMUSG00000026923(Notch1),ENSMUSG00000027878(Notch2),ENSMUSG00000039191(Rbpj),ENSMUSG00000028800(Hdac1),ENSMUSG00000024642(Tle4)	ENSMUSG00000008305(Tle1),ENSMUSG00000040415(Dtx3),ENSMUSG00000053040(Aph1c),ENSMUSG00000034758(Tle6),ENSMUSG00000010609(Psen2),ENSMUSG00000020888(Dvl2),ENSMUSG00000025158(Rfng),ENSMUSG00000029478(Ncor2),ENSMUSG00000034771(Tle2),ENSMUSG00000041777(Cir1),ENSMUSG00000029570(Lfng)	http://www.kegg.jp/kegg-bin/show_pathway?map04330/K02353%09%23FFFFFF,green/K06172%09%23FFFFFF,purple/K06066%09%23FFFFFF,green/K06059%09%23FFFFFF,red/K06067%09%23FFFFFF,red/K04522%09%23FFFFFF,green/K06052%09%23FFFFFF,red/K06053%09%23FFFFFF,red/K06061%09%23FFFFFF,red/K20994%09%23FFFFFF,red/K02599%09%23FFFFFF,red/K06058%09%23FFFFFF,purple/K04497%09%23FFFFFF,purple/K06065%09%23FFFFFF,green/K06051%09%…
mmu04623	Cytosolic DNA-sensing pathway	Organismal Systems	Immune system	22	3	25	63	0.000195844	0.00136221	ENSMUSG00000032344(Cgas),ENSMUSG00000027514(Zbp1),ENSMUSG00000039217(Il18),ENSMUSG00000004221(Ikbkg),ENSMUSG00000024927(Rela),ENSMUSG00000040296(Ddx58),ENSMUSG00000048806(Ifnb1),ENSMUSG00000000776(Polr3d),ENSMUSG00000026535(Ifi202b),ENSMUSG00000042349(Ikbke),ENSMUSG00000025746(Il6),ENSMUSG00000025888(Casp1),ENSMUSG00000035042(Ccl5),ENSMUSG00000018930(Ccl4),ENSMUSG00000030595(Nfkbib),ENSMUSG000000…	ENSMUSG00000035834(Polr3g),ENSMUSG00000024349(Sting1),ENSMUSG00000028104(Polr3gl)	http://www.kegg.jp/kegg-bin/show_pathway?map04623/K12968%09%23FFFFFF,red/K09447%09%23FFFFFF,red/K12499%09%23FFFFFF,red/K04519%09%23FFFFFF,red/K17834%09%23FFFFFF,red/K04734%09%23FFFFFF,red/K05405%09%23FFFFFF,red/K07211%09%23FFFFFF,red/K12671%09%23FFFFFF,red/K05482%09%23FFFFFF,red/K12964%09%23FFFFFF,red/K05410%09%23FFFFFF,red/K12971%09%23FFFFFF,red/K12646%09%23FFFFFF,red/K02580%09%23FFFFFF,red/K126…
mmu05166	HTLV-I infection	Human Diseases	Infectious diseases: Viral	50	19	69	236	0.000251157	0.00170896	ENSMUSG00000004043(Stat5a),ENSMUSG00000005732(Ranbp1),ENSMUSG00000073421(H2-Ab1),ENSMUSG00000031712(Il15),ENSMUSG00000053835(H2-T24),ENSMUSG00000029910(Mad2l1),ENSMUSG00000025746(Il6),ENSMUSG00000017652(Cd40),ENSMUSG00000030830(Itgal),ENSMUSG00000053007(Creb5),ENSMUSG00000022092(Ppp3cc),ENSMUSG00000037405(Icam1),ENSMUSG00000015605(Srf),ENSMUSG00000020248(Nfyb),ENSMUSG00000004221(Ikbkg),ENSMUSG000…	ENSMUSG00000022105(Rb1),ENSMUSG00000005580(Adcy9),ENSMUSG00000040084(Bub1b),ENSMUSG00000002068(Ccne1),ENSMUSG00000032440(Tgfbr2),ENSMUSG00000021754(Map3k1),ENSMUSG00000021250(Fos),ENSMUSG00000003575(Crtc1),ENSMUSG00000029521(Chek2),ENSMUSG00000025358(Cdk2),ENSMUSG00000052684(Jun),ENSMUSG00000038648(Creb3l2),ENSMUSG00000020654(Adcy3),ENSMUSG00000031834(Pik3r2),ENSMUSG00000021253(Tgfb3),ENSMUSG0000…	http://www.kegg.jp/kegg-bin/show_pathway?map05166/K09048%09%23FFFFFF,green/K03156%09%23FFFFFF,red/K11223%09%23FFFFFF,red/K06752%09%23FFFFFF,red/K06490%09%23FFFFFF,red/K04503%09%23FFFFFF,green/K04379%09%23FFFFFF,green/K17332%09%23FFFFFF,green/K08049%09%23FFFFFF,green/K07299%09%23FFFFFF,red/K05405%09%23FFFFFF,red/K02537%09%23FFFFFF,red/K04735%09%23FFFFFF,red/K06641%09%23FFFFFF,green/K06625%09%23FFF…
mmu05220	Chronic myeloid leukemia	Human Diseases	Cancers: Specific types	16	12	28	75	0.000282679	0.00184373	ENSMUSG00000004936(Map2k1),ENSMUSG00000004043(Stat5a),ENSMUSG00000004221(Ikbkg),ENSMUSG00000024927(Rela),ENSMUSG00000022346(Myc),ENSMUSG00000002413(Braf),ENSMUSG00000040274(Cdk6),ENSMUSG00000000441(Raf1),ENSMUSG00000043733(Ptpn11),ENSMUSG00000041417(Pik3r1),ENSMUSG00000028163(Nfkb1),ENSMUSG00000021025(Nfkbia),ENSMUSG00000023067(Cdkn1a),ENSMUSG00000028800(Hdac1),ENSMUSG00000015312(Gadd45b),ENSMUSG…	ENSMUSG00000031834(Pik3r2),ENSMUSG00000021253(Tgfb3),ENSMUSG00000018983(E2f2),ENSMUSG00000020312(Shc2),ENSMUSG00000021453(Gadd45g),ENSMUSG00000021668(Polk),ENSMUSG00000070348(Ccnd1),ENSMUSG00000035109(Shc4),ENSMUSG00000022105(Rb1),ENSMUSG00000032440(Tgfbr2),ENSMUSG00000026842(Abl1),ENSMUSG00000002109(Ddb2)	http://www.kegg.jp/kegg-bin/show_pathway?map05220/K10140%09%23FFFFFF,green/K06625%09%23FFFFFF,red/K17449%09%23FFFFFF,green/K02091%09%23FFFFFF,red/K06619%09%23FFFFFF,green/K17447%09%23FFFFFF,green/K07293%09%23FFFFFF,red/K03511%09%23FFFFFF,green/K04365%09%23FFFFFF,red/K02580%09%23FFFFFF,red/K07210%09%23FFFFFF,red/K06067%09%23FFFFFF,red/K04377%09%23FFFFFF,red/K04402%09%23FFFFFF,purple/K11223%09%23FF…
mmu05143	African trypanosomiasis	Human Diseases	Infectious diseases: Parasitic	15	1	16	34	0.000282745	0.00184373	ENSMUSG00000039217(Il18),ENSMUSG00000016529(Il10),ENSMUSG00000037405(Icam1),ENSMUSG00000024401(Tnf),ENSMUSG00000052889(Prkcb),ENSMUSG00000025746(Il6),ENSMUSG00000027962(Vcam1),ENSMUSG00000024639(Gnaq),ENSMUSG00000026582(Sele),ENSMUSG00000024778(Fas),ENSMUSG00000027776(Il12a),ENSMUSG00000032508(Myd88),ENSMUSG00000004296(Il12b),ENSMUSG00000031549(Ido2),ENSMUSG00000027398(Il1b)	ENSMUSG00000040061(Plcb2)	http://www.kegg.jp/kegg-bin/show_pathway?map05143/K06494%09%23FFFFFF,red/K00463%09%23FFFFFF,red/K05482%09%23FFFFFF,red/K04729%09%23FFFFFF,red/K19662%09%23FFFFFF,red/K06490%09%23FFFFFF,red/K05858%09%23FFFFFF,green/K04390%09%23FFFFFF,red/K04634%09%23FFFFFF,red/K06527%09%23FFFFFF,red/K03156%09%23FFFFFF,red/K05443%09%23FFFFFF,red/K04519%09%23FFFFFF,red/K05405%09%23FFFFFF,red/K05406%09%23FFFFFF,red/K0…
mmu03430	Mismatch repair	Genetic Information Processing	Replication and repair	0	12	12	22	0.000294263	0.00187968	-	ENSMUSG00000021245(Mlh3),ENSMUSG00000079109(Pms2),ENSMUSG00000023104(Rfc2),ENSMUSG00000024151(Msh2),ENSMUSG00000012483(Rpa3),ENSMUSG00000005370(Msh6),ENSMUSG00000024854(Pold4),ENSMUSG00000038644(Pold1),ENSMUSG00000022881(Rfc4),ENSMUSG00000056394(Lig1),ENSMUSG00000032498(Mlh1),ENSMUSG00000000751(Rpa1)	http://www.kegg.jp/kegg-bin/show_pathway?map03430/K10740%09%23FFFFFF,green/K10858%09%23FFFFFF,green/K08734%09%23FFFFFF,green/K10747%09%23FFFFFF,green/K08735%09%23FFFFFF,green/K08737%09%23FFFFFF,green/K07466%09%23FFFFFF,green/K10755%09%23FFFFFF,green/K08739%09%23FFFFFF,green/K02327%09%23FFFFFF,green/K03505%09%23FFFFFF,green/
mmu05416	Viral myocarditis	Human Diseases	Cardiovascular diseases	22	6	28	76	0.000364546	0.00228206	ENSMUSG00000033220(Rac2),ENSMUSG00000007655(Cav1),ENSMUSG00000029580(Actb),ENSMUSG00000056116(H2-T22),ENSMUSG00000026399(Cd55),ENSMUSG00000067212(H2-T23),ENSMUSG00000035929(H2-Q4),ENSMUSG00000024334(H2-Oa),ENSMUSG00000022901(Cd86),ENSMUSG00000092243(Gm7030),ENSMUSG00000037405(Icam1),ENSMUSG00000063694(Cycs),ENSMUSG00000017652(Cd40),ENSMUSG00000030830(Itgal),ENSMUSG00000053835(H2-T24),ENSMUSG00000…	ENSMUSG00000039952(Dag1),ENSMUSG00000070348(Ccnd1),ENSMUSG00000026012(Cd28),ENSMUSG00000028914(Casp9),ENSMUSG00000026842(Abl1),ENSMUSG00000031628(Casp3)	http://www.kegg.jp/kegg-bin/show_pathway?map05416/K06490%09%23FFFFFF,red/K05718%09%23FFFFFF,red/K04503%09%23FFFFFF,green/K04726%09%23FFFFFF,red/K04006%09%23FFFFFF,red/K04399%09%23FFFFFF,green/K03260%09%23FFFFFF,red/K06470%09%23FFFFFF,green/K06619%09%23FFFFFF,green/K05412%09%23FFFFFF,red/K03160%09%23FFFFFF,red/K05413%09%23FFFFFF,red/K02187%09%23FFFFFF,green/K08738%09%23FFFFFF,red/K06752%09%23FFFFF…
mmu04151	PI3K-Akt signaling pathway	Environmental Information Processing	Signal transduction	62	34	96	355	0.000415	0.00254696	ENSMUSG00000019471(Cdc37),ENSMUSG00000026770(Il2ra),ENSMUSG00000021457(Syk),ENSMUSG00000040274(Cdk6),ENSMUSG00000049929(Lpar4),ENSMUSG00000003070(Efna2),ENSMUSG00000000441(Raf1),ENSMUSG00000009630(Ppp2cb),ENSMUSG00000040329(Il7),ENSMUSG00000029304(Spp1),ENSMUSG00000046207(Pik3r6),ENSMUSG00000029377(Ereg),ENSMUSG00000041417(Pik3r1),ENSMUSG00000009376(Met),ENSMUSG00000028163(Nfkb1),ENSMUSG000000293…	ENSMUSG00000062960(Kdr),ENSMUSG00000067714(Lpar5),ENSMUSG00000025856(Pdgfa),ENSMUSG00000040618(Pck2),ENSMUSG00000028914(Casp9),ENSMUSG00000033446(Lpar6),ENSMUSG00000028864(Hgf),ENSMUSG00000070348(Ccnd1),ENSMUSG00000055980(Irs1),ENSMUSG00000006235(Epor),ENSMUSG00000020689(Itgb3),ENSMUSG00000022817(Itgb5),ENSMUSG00000048240(Gng7),ENSMUSG00000017146(Brca1),ENSMUSG00000031465(Angpt2),ENSMUSG000000386…	http://www.kegg.jp/kegg-bin/show_pathway?map04151/K21289%09%23FFFFFF,red/K10160%09%23FFFFFF,green/K04503%09%23FFFFFF,green/K05450%09%23FFFFFF,green/K04382%09%23FFFFFF,red/K05719%09%23FFFFFF,red/K09554%09%23FFFFFF,red/K05460%09%23FFFFFF,green/K04543%09%23FFFFFF,green/K04354%09%23FFFFFF,red/K04539%09%23FFFFFF,green/K11584%09%23FFFFFF,red/K06588%09%23FFFFFF,green/K04447%09%23FFFFFF,red/K04368%09%23F…
mmu05212	Pancreatic cancer	Human Diseases	Cancers: Specific types	16	11	27	73	0.000428716	0.00258054	ENSMUSG00000015312(Gadd45b),ENSMUSG00000000441(Raf1),ENSMUSG00000040274(Cdk6),ENSMUSG00000023067(Cdkn1a),ENSMUSG00000026821(Ralgds),ENSMUSG00000028163(Nfkb1),ENSMUSG00000041417(Pik3r1),ENSMUSG00000026104(Stat1),ENSMUSG00000024927(Rela),ENSMUSG00000002413(Braf),ENSMUSG00000020122(Egfr),ENSMUSG00000004221(Ikbkg),ENSMUSG00000004936(Map2k1),ENSMUSG00000033220(Rac2),ENSMUSG00000021936(Mapk8),ENSMUSG00…	ENSMUSG00000041147(Brca2),ENSMUSG00000032440(Tgfbr2),ENSMUSG00000022105(Rb1),ENSMUSG00000002109(Ddb2),ENSMUSG00000070348(Ccnd1),ENSMUSG00000028914(Casp9),ENSMUSG00000021668(Polk),ENSMUSG00000021453(Gadd45g),ENSMUSG00000021253(Tgfb3),ENSMUSG00000031834(Pik3r2),ENSMUSG00000018983(E2f2)	http://www.kegg.jp/kegg-bin/show_pathway?map05212/K09389%09%23FFFFFF,green/K04440%09%23FFFFFF,red/K04365%09%23FFFFFF,red/K11220%09%23FFFFFF,red/K07860%09%23FFFFFF,red/K04402%09%23FFFFFF,purple/K04503%09%23FFFFFF,green/K04361%09%23FFFFFF,red/K04388%09%23FFFFFF,green/K02580%09%23FFFFFF,red/K04399%09%23FFFFFF,green/K07210%09%23FFFFFF,red/K02091%09%23FFFFFF,red/K10140%09%23FFFFFF,green/K03511%09%23FF…
mmu05321	Inflammatory bowel disease (IBD)	Human Diseases	Immune diseases	18	5	23	59	0.000471165	0.00278254	ENSMUSG00000004040(Stat3),ENSMUSG00000031304(Il2rg),ENSMUSG00000024401(Tnf),ENSMUSG00000055994(Nod2),ENSMUSG00000024334(H2-Oa),ENSMUSG00000024927(Rela),ENSMUSG00000039217(Il18),ENSMUSG00000025383(Il23a),ENSMUSG00000016529(Il10),ENSMUSG00000026104(Stat1),ENSMUSG00000027398(Il1b),ENSMUSG00000027995(Tlr2),ENSMUSG00000028163(Nfkb1),ENSMUSG00000027776(Il12a),ENSMUSG00000004296(Il12b),ENSMUSG0000007342…	ENSMUSG00000032238(Rora),ENSMUSG00000039005(Tlr4),ENSMUSG00000021253(Tgfb3),ENSMUSG00000000869(Il4),ENSMUSG00000052684(Jun)	http://www.kegg.jp/kegg-bin/show_pathway?map05321/K05425%09%23FFFFFF,red/K10159%09%23FFFFFF,red/K02580%09%23FFFFFF,red/K05405%09%23FFFFFF,red/K03156%09%23FFFFFF,red/K05406%09%23FFFFFF,red/K04692%09%23FFFFFF,red/K04519%09%23FFFFFF,red/K08532%09%23FFFFFF,green/K13377%09%23FFFFFF,green/K05443%09%23FFFFFF,red/K10160%09%23FFFFFF,green/K11220%09%23FFFFFF,red/K06752%09%23FFFFFF,red/K04735%09%23FFFFFF,re…
mmu04917	Prolactin signaling pathway	Organismal Systems	Endocrine system	18	9	27	74	0.000550042	0.0031882	ENSMUSG00000021936(Mapk8),ENSMUSG00000004040(Stat3),ENSMUSG00000004936(Map2k1),ENSMUSG00000053436(Mapk14),ENSMUSG00000024927(Rela),ENSMUSG00000024789(Jak2),ENSMUSG00000026104(Stat1),ENSMUSG00000004043(Stat5a),ENSMUSG00000028163(Nfkb1),ENSMUSG00000000184(Ccnd2),ENSMUSG00000041417(Pik3r1),ENSMUSG00000000441(Raf1),ENSMUSG00000027646(Src),ENSMUSG00000018899(Irf1),ENSMUSG00000053113(Socs3),ENSMUSG0000…	ENSMUSG00000048756(Foxo3),ENSMUSG00000031834(Pik3r2),ENSMUSG00000020027(Socs2),ENSMUSG00000021250(Fos),ENSMUSG00000020312(Shc2),ENSMUSG00000070348(Ccnd1),ENSMUSG00000035109(Shc4),ENSMUSG00000019768(Esr1),ENSMUSG00000056153(Socs6)	http://www.kegg.jp/kegg-bin/show_pathway?map04917/K04440%09%23FFFFFF,red/K04447%09%23FFFFFF,red/K04694%09%23FFFFFF,red/K04695%09%23FFFFFF,green/K04366%09%23FFFFFF,red/K09408%09%23FFFFFF,green/K17449%09%23FFFFFF,green/K04696%09%23FFFFFF,red/K04503%09%23FFFFFF,green/K09444%09%23FFFFFF,red/K02580%09%23FFFFFF,red/K05704%09%23FFFFFF,red/K04441%09%23FFFFFF,red/K04692%09%23FFFFFF,red/K11223%09%23FFFFFF,…
mmu04115	p53 signaling pathway	Cellular Processes	Cell growth and death	11	15	26	71	0.000648245	0.0036891	ENSMUSG00000063694(Cycs),ENSMUSG00000004446(Bid),ENSMUSG00000040749(Siah1b),ENSMUSG00000040782(Cop1),ENSMUSG00000024778(Fas),ENSMUSG00000015312(Gadd45b),ENSMUSG00000027215(Cd82),ENSMUSG00000040274(Cdk6),ENSMUSG00000000184(Ccnd2),ENSMUSG00000023067(Cdkn1a),ENSMUSG00000037411(Serpine1)	ENSMUSG00000002068(Ccne1),ENSMUSG00000026389(Steap3),ENSMUSG00000029521(Chek2),ENSMUSG00000028893(Sesn2),ENSMUSG00000021453(Gadd45g),ENSMUSG00000038332(Sesn1),ENSMUSG00000020649(Rrm2),ENSMUSG00000002083(Bbc3),ENSMUSG00000031628(Casp3),ENSMUSG00000025358(Cdk2),ENSMUSG00000064326(Siva1),ENSMUSG00000002109(Ddb2),ENSMUSG00000025507(Pidd1),ENSMUSG00000070348(Ccnd1),ENSMUSG00000028914(Casp9)	http://www.kegg.jp/kegg-bin/show_pathway?map04115/K10151%09%23FFFFFF,red/K10143%09%23FFFFFF,red/K06626%09%23FFFFFF,green/K02091%09%23FFFFFF,red/K04390%09%23FFFFFF,red/K10808%09%23FFFFFF,green/K04399%09%23FFFFFF,green/K08738%09%23FFFFFF,red/K10132%09%23FFFFFF,green/K10141%09%23FFFFFF,green/K06625%09%23FFFFFF,red/K10142%09%23FFFFFF,green/K22744%09%23FFFFFF,green/K10130%09%23FFFFFF,green/K03982%09%2…
mmu04146	Peroxisome	Cellular Processes	Transport and catabolism	10	20	30	86	0.00066924	0.00374057	ENSMUSG00000020826(Nos2),ENSMUSG00000024981(Acsl5),ENSMUSG00000021417(Eci2),ENSMUSG00000031278(Acsl4),ENSMUSG00000028691(Prdx1),ENSMUSG00000018796(Acsl1),ENSMUSG00000006818(Sod2),ENSMUSG00000024953(Prdx5),ENSMUSG00000022404(Slc25a17),ENSMUSG00000030545(Pex11a)	ENSMUSG00000026189(Pecr),ENSMUSG00000053898(Ech1),ENSMUSG00000003623(Crot),ENSMUSG00000025464(Paox),ENSMUSG00000029098(Acox3),ENSMUSG00000067825(Pex26),ENSMUSG00000000876(Pxmp4),ENSMUSG00000022679(Mpv17l),ENSMUSG00000021240(Abcd4),ENSMUSG00000028672(Hmgcl),ENSMUSG00000055782(Abcd2),ENSMUSG00000029864(Gstk1),ENSMUSG00000107283(Mpv17),ENSMUSG00000031767(Nudt7),ENSMUSG00000036775(Decr2),ENSMUSG00000…	http://www.kegg.jp/kegg-bin/show_pathway?map04146/K13354%09%23FFFFFF,red/K11187%09%23FFFFFF,red/K05678%09%23FFFFFF,green/K12663%09%23FFFFFF,green/K05676%09%23FFFFFF,green/K01640%09%23FFFFFF,green/K13299%09%23FFFFFF,green/K01796%09%23FFFFFF,green/K13350%09%23FFFFFF,green/K13348%09%23FFFFFF,green/K13349%09%23FFFFFF,green/K13351%09%23FFFFFF,red/K00308%09%23FFFFFF,green/K13340%09%23FFFFFF,green/K1323…
mmu04722	Neurotrophin signaling pathway	Organismal Systems	Nervous system	26	13	39	121	0.000709814	0.00389775	ENSMUSG00000002413(Braf),ENSMUSG00000024927(Rela),ENSMUSG00000053436(Mapk14),ENSMUSG00000004936(Map2k1),ENSMUSG00000005057(Sh2b2),ENSMUSG00000021936(Mapk8),ENSMUSG00000021948(Prkcd),ENSMUSG00000016528(Mapkapk2),ENSMUSG00000060477(Irak2),ENSMUSG00000030220(Arhgdib),ENSMUSG00000052681(Rap1b),ENSMUSG00000053137(Mapk11),ENSMUSG00000001175(Calm1),ENSMUSG00000017776(Crk),ENSMUSG00000030595(Nfkbib),ENSM…	ENSMUSG00000021754(Map3k1),ENSMUSG00000020312(Shc2),ENSMUSG00000010609(Psen2),ENSMUSG00000031714(Gab1),ENSMUSG00000048756(Foxo3),ENSMUSG00000016933(Plcg1),ENSMUSG00000031834(Pik3r2),ENSMUSG00000004933(Matk),ENSMUSG00000052684(Jun),ENSMUSG00000021820(Camk2g),ENSMUSG00000026842(Abl1),ENSMUSG00000055980(Irs1),ENSMUSG00000035109(Shc4)	http://www.kegg.jp/kegg-bin/show_pathway?map04722/K07293%09%23FFFFFF,red/K09593%09%23FFFFFF,green/K01116%09%23FFFFFF,green/K04441%09%23FFFFFF,red/K07193%09%23FFFFFF,red/K02581%09%23FFFFFF,red/K08888%09%23FFFFFF,green/K04365%09%23FFFFFF,red/K04734%09%23FFFFFF,red/K12462%09%23FFFFFF,red/K06068%09%23FFFFFF,red/K04731%09%23FFFFFF,red/K04366%09%23FFFFFF,red/K04515%09%23FFFFFF,purple/K04735%09%23FFFFFF…
mmu04650	Natural killer cell mediated cytotoxicity	Organismal Systems	Immune system	35	7	42	133	0.000725468	0.00391503	ENSMUSG00000022967(Ifnar1),ENSMUSG00000030830(Itgal),ENSMUSG00000053835(H2-T24),ENSMUSG00000004266(Ptpn6),ENSMUSG00000004446(Bid),ENSMUSG00000005763(Cd247),ENSMUSG00000035929(H2-Q4),ENSMUSG00000022971(Ifnar2),ENSMUSG00000022074(Tnfrsf10b),ENSMUSG00000030149(Klrk1),ENSMUSG00000061232(H2-K1),ENSMUSG00000002413(Braf),ENSMUSG00000092243(Gm7030),ENSMUSG00000024778(Fas),ENSMUSG00000022092(Ppp3cc),ENSMU…	ENSMUSG00000020312(Shc2),ENSMUSG00000031628(Casp3),ENSMUSG00000016933(Plcg1),ENSMUSG00000031834(Pik3r2),ENSMUSG00000102418(Sh2d1b1),ENSMUSG00000035109(Shc4),ENSMUSG00000027544(Nfatc2)	http://www.kegg.jp/kegg-bin/show_pathway?map04650/K07860%09%23FFFFFF,red/K05718%09%23FFFFFF,red/K06453%09%23FFFFFF,red/K17332%09%23FFFFFF,green/K17449%09%23FFFFFF,green/K05130%09%23FFFFFF,red/K05856%09%23FFFFFF,red/K05427%09%23FFFFFF,red/K07989%09%23FFFFFF,green/K07987%09%23FFFFFF,red/K17447%09%23FFFFFF,green/K02649%09%23FFFFFF,purple/K04726%09%23FFFFFF,red/K19662%09%23FFFFFF,red/K04365%09%23FFFF…
mmu05221	Acute myeloid leukemia	Human Diseases	Cancers: Specific types	19	6	25	68	0.000763841	0.00398471	ENSMUSG00000004043(Stat5a),ENSMUSG00000102037(Bcl2a1a),ENSMUSG00000004936(Map2k1),ENSMUSG00000018916(Csf2),ENSMUSG00000089929(Bcl2a1b),ENSMUSG00000000441(Raf1),ENSMUSG00000099974(Bcl2a1d),ENSMUSG00000041417(Pik3r1),ENSMUSG00000004221(Ikbkg),ENSMUSG00000024014(Pim1),ENSMUSG00000004040(Stat3),ENSMUSG00000002413(Braf),ENSMUSG00000031155(Pim2),ENSMUSG00000002111(Spi1),ENSMUSG00000036986(Pml),ENSMUSG0…	ENSMUSG00000001552(Jup),ENSMUSG00000031834(Pik3r2),ENSMUSG00000019960(Dusp6),ENSMUSG00000066687(Zbtb16),ENSMUSG00000070348(Ccnd1),ENSMUSG00000034957(Cebpa)	http://www.kegg.jp/kegg-bin/show_pathway?map05221/K04702%09%23FFFFFF,red/K10056%09%23FFFFFF,green/K07210%09%23FFFFFF,red/K10054%09%23FFFFFF,red/K04366%09%23FFFFFF,red/K04365%09%23FFFFFF,red/K04368%09%23FFFFFF,red/K08806%09%23FFFFFF,red/K02649%09%23FFFFFF,purple/K10055%09%23FFFFFF,green/K02580%09%23FFFFFF,red/K05427%09%23FFFFFF,red/K09055%09%23FFFFFF,green/K11223%09%23FFFFFF,red/K04391%09%23FFFFFF…
mmu05211	Renal cell carcinoma	Human Diseases	Cancers: Specific types	18	7	25	68	0.000763841	0.00398471	ENSMUSG00000023067(Cdkn1a),ENSMUSG00000009376(Met),ENSMUSG00000035105(Egln3),ENSMUSG00000041417(Pik3r1),ENSMUSG00000039844(Rapgef1),ENSMUSG00000043733(Ptpn11),ENSMUSG00000000441(Raf1),ENSMUSG00000028645(Slc2a1),ENSMUSG00000079658(Eloc),ENSMUSG00000017776(Crk),ENSMUSG00000015709(Arnt2),ENSMUSG00000052681(Rap1b),ENSMUSG00000021109(Hif1a),ENSMUSG00000024231(Cul2),ENSMUSG00000004936(Map2k1),ENSMUSG00…	ENSMUSG00000028864(Hgf),ENSMUSG00000052684(Jun),ENSMUSG00000021253(Tgfb3),ENSMUSG00000031834(Pik3r2),ENSMUSG00000031714(Gab1),ENSMUSG00000024140(Epas1),ENSMUSG00000032633(Flcn)	http://www.kegg.jp/kegg-bin/show_pathway?map05211/K04366%09%23FFFFFF,red/K04368%09%23FFFFFF,red/K09593%09%23FFFFFF,green/K05734%09%23FFFFFF,red/K05099%09%23FFFFFF,red/K03870%09%23FFFFFF,red/K09095%09%23FFFFFF,green/K07299%09%23FFFFFF,red/K05460%09%23FFFFFF,green/K06625%09%23FFFFFF,red/K07293%09%23FFFFFF,red/K09594%09%23FFFFFF,green/K04438%09%23FFFFFF,red/K06277%09%23FFFFFF,red/K08268%09%23FFFFFF,…
mmu05210	Colorectal cancer	Human Diseases	Cancers: Specific types	15	15	30	87	0.000831946	0.00426884	ENSMUSG00000020122(Egfr),ENSMUSG00000022346(Myc),ENSMUSG00000002413(Braf),ENSMUSG00000063694(Cycs),ENSMUSG00000040760(Appl1),ENSMUSG00000033220(Rac2),ENSMUSG00000021936(Mapk8),ENSMUSG00000004936(Map2k1),ENSMUSG00000015312(Gadd45b),ENSMUSG00000029377(Ereg),ENSMUSG00000041417(Pik3r1),ENSMUSG00000023067(Cdkn1a),ENSMUSG00000029378(Areg),ENSMUSG00000026821(Ralgds),ENSMUSG00000000441(Raf1)	ENSMUSG00000021453(Gadd45g),ENSMUSG00000021250(Fos),ENSMUSG00000021668(Polk),ENSMUSG00000024151(Msh2),ENSMUSG00000021253(Tgfb3),ENSMUSG00000031834(Pik3r2),ENSMUSG00000002109(Ddb2),ENSMUSG00000005370(Msh6),ENSMUSG00000052684(Jun),ENSMUSG00000031628(Casp3),ENSMUSG00000002083(Bbc3),ENSMUSG00000032440(Tgfbr2),ENSMUSG00000028914(Casp9),ENSMUSG00000070348(Ccnd1),ENSMUSG00000032498(Mlh1)	http://www.kegg.jp/kegg-bin/show_pathway?map05210/K10132%09%23FFFFFF,green/K04366%09%23FFFFFF,red/K04399%09%23FFFFFF,green/K03511%09%23FFFFFF,green/K04402%09%23FFFFFF,purple/K08733%09%23FFFFFF,red/K13377%09%23FFFFFF,green/K09782%09%23FFFFFF,red/K08737%09%23FFFFFF,green/K04388%09%23FFFFFF,green/K04503%09%23FFFFFF,green/K04379%09%23FFFFFF,green/K08734%09%23FFFFFF,green/K04361%09%23FFFFFF,red/K02649…
mmu04066	HIF-1 signaling pathway	Environmental Information Processing	Signal transduction	25	8	33	99	0.00092503	0.00466991	ENSMUSG00000037411(Serpine1),ENSMUSG00000015340(Cybb),ENSMUSG00000041417(Pik3r1),ENSMUSG00000035105(Egln3),ENSMUSG00000021367(Edn1),ENSMUSG00000023067(Cdkn1a),ENSMUSG00000028163(Nfkb1),ENSMUSG00000057666(Gapdh),ENSMUSG00000028645(Slc2a1),ENSMUSG00000020826(Nos2),ENSMUSG00000053819(Camk2d),ENSMUSG00000079658(Eloc),ENSMUSG00000025746(Il6),ENSMUSG00000021109(Hif1a),ENSMUSG00000004040(Stat3),ENSMUSG0…	ENSMUSG00000021820(Camk2g),ENSMUSG00000031465(Angpt2),ENSMUSG00000031834(Pik3r2),ENSMUSG00000039005(Tlr4),ENSMUSG00000027947(Il6ra),ENSMUSG00000016933(Plcg1),ENSMUSG00000060600(Eno3),ENSMUSG00000020190(Mknk2)	http://www.kegg.jp/kegg-bin/show_pathway?map04066/K05055%09%23FFFFFF,green/K04735%09%23FFFFFF,red/K01116%09%23FFFFFF,green/K05096%09%23FFFFFF,red/K02580%09%23FFFFFF,red/K03872%09%23FFFFFF,red/K03259%09%23FFFFFF,red/K08268%09%23FFFFFF,red/K00134%09%23FFFFFF,red/K05466%09%23FFFFFF,green/K04368%09%23FFFFFF,red/K19662%09%23FFFFFF,red/K00510%09%23FFFFFF,red/K16366%09%23FFFFFF,red/K09592%09%23FFFFFF,re…
mmu04014	Ras signaling pathway	Environmental Information Processing	Signal transduction	38	27	65	231	0.00113285	0.00562831	ENSMUSG00000036402(Gng12),ENSMUSG00000001175(Calm1),ENSMUSG00000029064(Gnb1),ENSMUSG00000004952(Rasa4),ENSMUSG00000020275(Rel),ENSMUSG00000056220(Pla2g4a),ENSMUSG00000041992(Rapgef5),ENSMUSG00000052681(Rap1b),ENSMUSG00000009376(Met),ENSMUSG00000041417(Pik3r1),ENSMUSG00000038387(Rras),ENSMUSG00000055723(Rras2),ENSMUSG00000032356(Rasgrf1),ENSMUSG00000026821(Ralgds),ENSMUSG00000028163(Nfkb1),ENSMUSG…	ENSMUSG00000070565(Rasal2),ENSMUSG00000026842(Abl1),ENSMUSG00000024962(Vegfb),ENSMUSG00000031465(Angpt2),ENSMUSG00000048240(Gng7),ENSMUSG00000028864(Hgf),ENSMUSG00000025856(Pdgfa),ENSMUSG00000042903(Foxo4),ENSMUSG00000035109(Shc4),ENSMUSG00000041354(Rgl2),ENSMUSG00000071042(Rasgrp3),ENSMUSG00000062960(Kdr),ENSMUSG00000019966(Kitl),ENSMUSG00000028019(Pdgfc),ENSMUSG00000031714(Gab1),ENSMUSG00000031…	http://www.kegg.jp/kegg-bin/show_pathway?map04014/K14958%09%23FFFFFF,red/K09254%09%23FFFFFF,red/K04368%09%23FFFFFF,red/K05462%09%23FFFFFF,red/K17635%09%23FFFFFF,red/K05410%09%23FFFFFF,red/K19613%09%23FFFFFF,red/K17636%09%23FFFFFF,green/K04546%09%23FFFFFF,green/K07836%09%23FFFFFF,red/K05450%09%23FFFFFF,green/K17447%09%23FFFFFF,green/K08019%09%23FFFFFF,red/K02580%09%23FFFFFF,red/K12362%09%23FFFFFF,…
mmu05223	Non-small cell lung cancer	Human Diseases	Cancers: Specific types	12	12	24	66	0.00115384	0.00564302	ENSMUSG00000004043(Stat5a),ENSMUSG00000002413(Braf),ENSMUSG00000020122(Egfr),ENSMUSG00000004936(Map2k1),ENSMUSG00000004040(Stat3),ENSMUSG00000052889(Prkcb),ENSMUSG00000032624(Eml4),ENSMUSG00000015312(Gadd45b),ENSMUSG00000000441(Raf1),ENSMUSG00000040274(Cdk6),ENSMUSG00000023067(Cdkn1a),ENSMUSG00000041417(Pik3r1)	ENSMUSG00000021668(Polk),ENSMUSG00000015846(Rxra),ENSMUSG00000021453(Gadd45g),ENSMUSG00000016933(Plcg1),ENSMUSG00000026430(Rassf5),ENSMUSG00000048756(Foxo3),ENSMUSG00000031834(Pik3r2),ENSMUSG00000018983(E2f2),ENSMUSG00000022105(Rb1),ENSMUSG00000002109(Ddb2),ENSMUSG00000070348(Ccnd1),ENSMUSG00000028914(Casp9)	http://www.kegg.jp/kegg-bin/show_pathway?map05223/K04368%09%23FFFFFF,red/K06625%09%23FFFFFF,red/K04692%09%23FFFFFF,red/K08015%09%23FFFFFF,green/K04366%09%23FFFFFF,red/K09408%09%23FFFFFF,green/K03511%09%23FFFFFF,green/K10140%09%23FFFFFF,green/K04361%09%23FFFFFF,red/K09389%09%23FFFFFF,green/K01116%09%23FFFFFF,green/K04402%09%23FFFFFF,purple/K08524%09%23FFFFFF,green/K06618%09%23FFFFFF,green/K04399%0…
mmu03030	DNA replication	Genetic Information Processing	Replication and repair	0	15	15	35	0.00145579	0.00701021	-	ENSMUSG00000023104(Rfc2),ENSMUSG00000012483(Rpa3),ENSMUSG00000006678(Pola1),ENSMUSG00000022673(Mcm4),ENSMUSG00000026355(Mcm6),ENSMUSG00000024854(Pold4),ENSMUSG00000002870(Mcm2),ENSMUSG00000038644(Pold1),ENSMUSG00000036875(Dna2),ENSMUSG00000029730(Mcm7),ENSMUSG00000000751(Rpa1),ENSMUSG00000025395(Prim1),ENSMUSG00000007080(Pole),ENSMUSG00000056394(Lig1),ENSMUSG00000022881(Rfc4)	http://www.kegg.jp/kegg-bin/show_pathway?map03030/K02320%09%23FFFFFF,green/K02684%09%23FFFFFF,green/K02540%09%23FFFFFF,green/K07466%09%23FFFFFF,green/K02542%09%23FFFFFF,green/K02210%09%23FFFFFF,green/K02212%09%23FFFFFF,green/K10747%09%23FFFFFF,green/K10740%09%23FFFFFF,green/K10742%09%23FFFFFF,green/K10755%09%23FFFFFF,green/K03505%09%23FFFFFF,green/K02324%09%23FFFFFF,green/K02327%09%23FFFFFF,green/
mmu04672	Intestinal immune network for IgA production	Organismal Systems	Immune system	12	5	17	42	0.00154605	0.00733204	ENSMUSG00000024334(H2-Oa),ENSMUSG00000000732(Icosl),ENSMUSG00000022901(Cd86),ENSMUSG00000017652(Cd40),ENSMUSG00000016529(Il10),ENSMUSG00000031712(Il15),ENSMUSG00000075122(Cd80),ENSMUSG00000073421(H2-Ab1),ENSMUSG00000025746(Il6),ENSMUSG00000023206(Il15ra),ENSMUSG00000027009(Itga4),ENSMUSG00000029530(Ccr9)	ENSMUSG00000000869(Il4),ENSMUSG00000089669(Tnfsf13),ENSMUSG00000026012(Cd28),ENSMUSG00000031497(Tnfsf13b),ENSMUSG00000045382(Cxcr4)	http://www.kegg.jp/kegg-bin/show_pathway?map04672/K04184%09%23FFFFFF,red/K03160%09%23FFFFFF,red/K05476%09%23FFFFFF,green/K06483%09%23FFFFFF,red/K06470%09%23FFFFFF,green/K05413%09%23FFFFFF,red/K06710%09%23FFFFFF,red/K05412%09%23FFFFFF,red/K05443%09%23FFFFFF,red/K05430%09%23FFFFFF,green/K05405%09%23FFFFFF,red/K06752%09%23FFFFFF,red/K05433%09%23FFFFFF,red/K05475%09%23FFFFFF,green/K05074%09%23FFFFFF,…
mmu01521	EGFR tyrosine kinase inhibitor resistance	Human Diseases	Drug resistance: Antineoplastic	15	12	27	79	0.00171739	0.00802304	ENSMUSG00000024620(Pdgfrb),ENSMUSG00000028156(Eif4e),ENSMUSG00000002413(Braf),ENSMUSG00000024789(Jak2),ENSMUSG00000020122(Egfr),ENSMUSG00000004936(Map2k1),ENSMUSG00000062991(Nrg1),ENSMUSG00000004040(Stat3),ENSMUSG00000052889(Prkcb),ENSMUSG00000025746(Il6),ENSMUSG00000002602(Axl),ENSMUSG00000000441(Raf1),ENSMUSG00000027646(Src),ENSMUSG00000041417(Pik3r1),ENSMUSG00000009376(Met)	ENSMUSG00000020312(Shc2),ENSMUSG00000031714(Gab1),ENSMUSG00000028019(Pdgfc),ENSMUSG00000027947(Il6ra),ENSMUSG00000016933(Plcg1),ENSMUSG00000048756(Foxo3),ENSMUSG00000031834(Pik3r2),ENSMUSG00000062960(Kdr),ENSMUSG00000035109(Shc4),ENSMUSG00000028864(Hgf),ENSMUSG00000025856(Pdgfa),ENSMUSG00000031451(Gas6)	http://www.kegg.jp/kegg-bin/show_pathway?map01521/K05464%09%23FFFFFF,green/K05098%09%23FFFFFF,green/K05455%09%23FFFFFF,red/K04365%09%23FFFFFF,red/K04366%09%23FFFFFF,red/K17449%09%23FFFFFF,green/K03259%09%23FFFFFF,red/K05089%09%23FFFFFF,red/K04692%09%23FFFFFF,red/K17447%09%23FFFFFF,green/K05460%09%23FFFFFF,green/K05099%09%23FFFFFF,red/K05055%09%23FFFFFF,green/K04361%09%23FFFFFF,red/K02649%09%23FFF…
mmu05203	Viral carcinogenesis	Human Diseases	Cancers: Overview	44	17	61	218	0.00182507	0.0084007	ENSMUSG00000028271(Gtf2b),ENSMUSG00000067212(H2-T23),ENSMUSG00000056116(H2-T22),ENSMUSG00000024164(C3),ENSMUSG00000016528(Mapkapk2),ENSMUSG00000004040(Stat3),ENSMUSG00000035448(Ccr3),ENSMUSG00000004043(Stat5a),ENSMUSG00000021277(Traf3),ENSMUSG00000002325(Irf9),ENSMUSG00000053835(H2-T24),ENSMUSG00000032413(Rasa2),ENSMUSG00000024436(Mrps18b),ENSMUSG00000042228(Lyn),ENSMUSG00000004221(Ikbkg),ENSMUSG…	ENSMUSG00000031161(Hdac6),ENSMUSG00000031834(Pik3r2),ENSMUSG00000002068(Ccne1),ENSMUSG00000068854(H2bc21),ENSMUSG00000004698(Hdac9),ENSMUSG00000028238(Atp6v0d2),ENSMUSG00000021756(Il6st),ENSMUSG00000054115(Skp2),ENSMUSG00000062906(Hdac10),ENSMUSG00000070348(Ccnd1),ENSMUSG00000008855(Hdac5),ENSMUSG00000022105(Rb1),ENSMUSG00000021639(Gtf2h2),ENSMUSG00000031628(Casp3),ENSMUSG00000025358(Cdk2),ENSMUS…	http://www.kegg.jp/kegg-bin/show_pathway?map05203/K09254%09%23FFFFFF,red/K05854%09%23FFFFFF,red/K06053%09%23FFFFFF,red/K04685%09%23FFFFFF,red/K06751%09%23FFFFFF,red/K15041%09%23FFFFFF,red/K03142%09%23FFFFFF,green/K05060%09%23FFFFFF,green/K08053%09%23FFFFFF,red/K04443%09%23FFFFFF,red/K11409%09%23FFFFFF,green/K16174%09%23FFFFFF,red/K04692%09%23FFFFFF,red/K11407%09%23FFFFFF,green/K04693%09%23FFFFFF,…
mmu00532	Glycosaminoglycan biosynthesis - chondroitin sulfate / dermatan sulfate	Metabolism	Glycan biosynthesis and metabolism	6	4	10	20	0.00226691	0.0102832	ENSMUSG00000047712(Ust),ENSMUSG00000037347(Chst7),ENSMUSG00000030930(Chst15),ENSMUSG00000039497(Dse),ENSMUSG00000032997(Chpf),ENSMUSG00000058152(Chsy3)	ENSMUSG00000074916(Chst14),ENSMUSG00000036599(Chst12),ENSMUSG00000057337(Chst3),ENSMUSG00000030657(Xylt1)	http://www.kegg.jp/kegg-bin/show_pathway?map00532/K00771%09%23FFFFFF,green/K04743%09%23FFFFFF,red/K01020%09%23FFFFFF,green/K08106%09%23FFFFFF,red/K01794%09%23FFFFFF,red/K03193%09%23FFFFFF,red/K08105%09%23FFFFFF,green/K00747%09%23FFFFFF,red/K04742%09%23FFFFFF,green/K13499%09%23FFFFFF,red/
mmu01523	Antifolate resistance	Human Diseases	Drug resistance: Antineoplastic	10	3	13	30	0.00264819	0.0118412	ENSMUSG00000023088(Abcc1),ENSMUSG00000025746(Il6),ENSMUSG00000025747(Tyms),ENSMUSG00000028163(Nfkb1),ENSMUSG00000027398(Il1b),ENSMUSG00000022822(Abcc5),ENSMUSG00000032849(Abcc4),ENSMUSG00000024927(Rela),ENSMUSG00000004221(Ikbkg),ENSMUSG00000024401(Tnf)	ENSMUSG00000020829(Slc46a1),ENSMUSG00000021707(Dhfr),ENSMUSG00000020865(Abcc3)	http://www.kegg.jp/kegg-bin/show_pathway?map01523/K05667%09%23FFFFFF,green/K05665%09%23FFFFFF,red/K14613%09%23FFFFFF,green/K02580%09%23FFFFFF,red/K05405%09%23FFFFFF,red/K04735%09%23FFFFFF,red/K00287%09%23FFFFFF,green/K00560%09%23FFFFFF,red/K04519%09%23FFFFFF,red/K07210%09%23FFFFFF,red/K05668%09%23FFFFFF,red/K03156%09%23FFFFFF,red/K05673%09%23FFFFFF,red/
mmu05214	Glioma	Human Diseases	Cancers: Specific types	12	13	25	74	0.0029864	0.0131654	ENSMUSG00000020122(Egfr),ENSMUSG00000002413(Braf),ENSMUSG00000024620(Pdgfrb),ENSMUSG00000052889(Prkcb),ENSMUSG00000004936(Map2k1),ENSMUSG00000015312(Gadd45b),ENSMUSG00000001175(Calm1),ENSMUSG00000041417(Pik3r1),ENSMUSG00000023067(Cdkn1a),ENSMUSG00000040274(Cdk6),ENSMUSG00000053819(Camk2d),ENSMUSG00000000441(Raf1)	ENSMUSG00000021453(Gadd45g),ENSMUSG00000021668(Polk),ENSMUSG00000020312(Shc2),ENSMUSG00000018983(E2f2),ENSMUSG00000031834(Pik3r2),ENSMUSG00000016933(Plcg1),ENSMUSG00000002109(Ddb2),ENSMUSG00000021820(Camk2g),ENSMUSG00000022105(Rb1),ENSMUSG00000025856(Pdgfa),ENSMUSG00000070348(Ccnd1),ENSMUSG00000030272(Camk1),ENSMUSG00000035109(Shc4)	http://www.kegg.jp/kegg-bin/show_pathway?map05214/K10140%09%23FFFFFF,green/K03511%09%23FFFFFF,green/K06625%09%23FFFFFF,red/K01116%09%23FFFFFF,green/K06618%09%23FFFFFF,green/K19662%09%23FFFFFF,red/K04515%09%23FFFFFF,purple/K17449%09%23FFFFFF,green/K17447%09%23FFFFFF,green/K04365%09%23FFFFFF,red/K04359%09%23FFFFFF,green/K04402%09%23FFFFFF,purple/K04368%09%23FFFFFF,red/K09389%09%23FFFFFF,green/K0218…
mmu04510	Focal adhesion	Cellular Processes	Cellular community - eukaryotes	41	14	55	197	0.00312557	0.0135875	ENSMUSG00000017776(Crk),ENSMUSG00000000555(Itga5),ENSMUSG00000052681(Rap1b),ENSMUSG00000031502(Col4a1),ENSMUSG00000028364(Tnc),ENSMUSG00000039115(Itga9),ENSMUSG00000062825(Actg1),ENSMUSG00000029860(Zyx),ENSMUSG00000014956(Ppp1cb),ENSMUSG00000042284(Itga1),ENSMUSG00000000184(Ccnd2),ENSMUSG00000032356(Rasgrf1),ENSMUSG00000027009(Itga4),ENSMUSG00000029304(Spp1),ENSMUSG00000041417(Pik3r1),ENSMUSG0000…	ENSMUSG00000052684(Jun),ENSMUSG00000024962(Vegfb),ENSMUSG00000022817(Itgb5),ENSMUSG00000035109(Shc4),ENSMUSG00000020689(Itgb3),ENSMUSG00000070348(Ccnd1),ENSMUSG00000025856(Pdgfa),ENSMUSG00000028864(Hgf),ENSMUSG00000062960(Kdr),ENSMUSG00000028019(Pdgfc),ENSMUSG00000020312(Shc2),ENSMUSG00000024421(Lama3),ENSMUSG00000027111(Itga6),ENSMUSG00000031834(Pik3r2)	http://www.kegg.jp/kegg-bin/show_pathway?map04510/K17449%09%23FFFFFF,green/K16858%09%23FFFFFF,green/K04448%09%23FFFFFF,green/K04438%09%23FFFFFF,red/K06273%09%23FFFFFF,red/K07860%09%23FFFFFF,red/K05450%09%23FFFFFF,green/K06250%09%23FFFFFF,red/K17388%09%23FFFFFF,red/K04349%09%23FFFFFF,red/K05096%09%23FFFFFF,red/K05089%09%23FFFFFF,red/K05692%09%23FFFFFF,red/K04503%09%23FFFFFF,green/K06591%09%23FFFFF…
mmu04072	Phospholipase D signaling pathway	Environmental Information Processing	Signal transduction	23	19	42	143	0.00340746	0.0146101	ENSMUSG00000021457(Syk),ENSMUSG00000034731(Dgkh),ENSMUSG00000043733(Ptpn11),ENSMUSG00000000441(Raf1),ENSMUSG00000049929(Lpar4),ENSMUSG00000048076(Arf1),ENSMUSG00000041417(Pik3r1),ENSMUSG00000046207(Pik3r6),ENSMUSG00000038387(Rras),ENSMUSG00000020901(Pik3r5),ENSMUSG00000023827(Agpat4),ENSMUSG00000055723(Rras2),ENSMUSG00000026821(Ralgds),ENSMUSG00000028126(Pip5k1a),ENSMUSG00000020573(Pik3cg),ENSMUS…	ENSMUSG00000020654(Adcy3),ENSMUSG00000040061(Plcb2),ENSMUSG00000040479(Dgkz),ENSMUSG00000067714(Lpar5),ENSMUSG00000033446(Lpar6),ENSMUSG00000025856(Pdgfa),ENSMUSG00000035109(Shc4),ENSMUSG00000022469(Rapgef3),ENSMUSG00000005580(Adcy9),ENSMUSG00000022861(Dgkg),ENSMUSG00000025357(Dgka),ENSMUSG00000017132(Cyth1),ENSMUSG00000031834(Pik3r2),ENSMUSG00000016933(Plcg1),ENSMUSG00000000149(Gna12),ENSMUSG000…	http://www.kegg.jp/kegg-bin/show_pathway?map04072/K04359%09%23FFFFFF,green/K08732%09%23FFFFFF,red/K08390%09%23FFFFFF,green/K09593%09%23FFFFFF,green/K18441%09%23FFFFFF,green/K07829%09%23FFFFFF,red/K03914%09%23FFFFFF,red/K05450%09%23FFFFFF,green/K04366%09%23FFFFFF,red/K07830%09%23FFFFFF,red/K04273%09%23FFFFFF,green/K05855%09%23FFFFFF,red/K00889%09%23FFFFFF,red/K08043%09%23FFFFFF,green/K04368%09%23F…
mmu04920	Adipocytokine signaling pathway	Organismal Systems	Endocrine system	19	5	24	71	0.0035521	0.0150244	ENSMUSG00000004040(Stat3),ENSMUSG00000028163(Nfkb1),ENSMUSG00000021025(Nfkbia),ENSMUSG00000021936(Mapk8),ENSMUSG00000028645(Slc2a1),ENSMUSG00000029471(Camkk2),ENSMUSG00000018796(Acsl1),ENSMUSG00000024401(Tnf),ENSMUSG00000024981(Acsl5),ENSMUSG00000043733(Ptpn11),ENSMUSG00000004221(Ikbkg),ENSMUSG00000026942(Traf2),ENSMUSG00000024927(Rela),ENSMUSG00000030595(Nfkbib),ENSMUSG00000023947(Nfkbie),ENSMUS…	ENSMUSG00000040618(Pck2),ENSMUSG00000055980(Irs1),ENSMUSG00000038894(Irs2),ENSMUSG00000015846(Rxra),ENSMUSG00000028944(Prkag2)	http://www.kegg.jp/kegg-bin/show_pathway?map04920/K08524%09%23FFFFFF,green/K07299%09%23FFFFFF,red/K03156%09%23FFFFFF,red/K04447%09%23FFFFFF,red/K04734%09%23FFFFFF,red/K03173%09%23FFFFFF,red/K16172%09%23FFFFFF,green/K04440%09%23FFFFFF,red/K07359%09%23FFFFFF,red/K04696%09%23FFFFFF,red/K02581%09%23FFFFFF,red/K05872%09%23FFFFFF,red/K07187%09%23FFFFFF,green/K01897%09%23FFFFFF,red/K05141%09%23FFFFFF,re…
mmu04068	FoxO signaling pathway	Environmental Information Processing	Signal transduction	20	19	39	131	0.0036031	0.0150369	ENSMUSG00000006818(Sod2),ENSMUSG00000004936(Map2k1),ENSMUSG00000004040(Stat3),ENSMUSG00000021936(Mapk8),ENSMUSG00000016529(Il10),ENSMUSG00000020122(Egfr),ENSMUSG00000053436(Mapk14),ENSMUSG00000002413(Braf),ENSMUSG00000073802(Cdkn2b),ENSMUSG00000000441(Raf1),ENSMUSG00000041417(Pik3r1),ENSMUSG00000023067(Cdkn1a),ENSMUSG00000000184(Ccnd2),ENSMUSG00000039304(Tnfsf10),ENSMUSG00000021701(Plk2),ENSMUSG0…	ENSMUSG00000021253(Tgfb3),ENSMUSG00000031834(Pik3r2),ENSMUSG00000045092(S1pr1),ENSMUSG00000048756(Foxo3),ENSMUSG00000044167(Foxo1),ENSMUSG00000037111(Setd7),ENSMUSG00000028944(Prkag2),ENSMUSG00000021453(Gadd45g),ENSMUSG00000003882(Il7r),ENSMUSG00000038894(Irs2),ENSMUSG00000022358(Fbxo32),ENSMUSG00000022433(Csnk1e),ENSMUSG00000054115(Skp2),ENSMUSG00000042903(Foxo4),ENSMUSG00000040618(Pck2),ENSMUSG…	http://www.kegg.jp/kegg-bin/show_pathway?map04068/K04366%09%23FFFFFF,red/K04441%09%23FFFFFF,red/K04721%09%23FFFFFF,red/K02206%09%23FFFFFF,green/K01596%09%23FFFFFF,green/K07187%09%23FFFFFF,green/K04402%09%23FFFFFF,purple/K04368%09%23FFFFFF,red/K08862%09%23FFFFFF,red/K04692%09%23FFFFFF,red/K05072%09%23FFFFFF,green/K04388%09%23FFFFFF,green/K04361%09%23FFFFFF,red/K08861%09%23FFFFFF,red/K05405%09%23FF…
mmu04940	Type I diabetes mellitus	Human Diseases	Endocrine and metabolic diseases	19	2	21	60	0.00388761	0.0160108	ENSMUSG00000073421(H2-Ab1),ENSMUSG00000027399(Il1a),ENSMUSG00000024778(Fas),ENSMUSG00000027776(Il12a),ENSMUSG00000075122(Cd80),ENSMUSG00000061232(H2-K1),ENSMUSG00000004296(Il12b),ENSMUSG00000027398(Il1b),ENSMUSG00000026204(Ptprn),ENSMUSG00000016283(H2-M2),ENSMUSG00000053835(H2-T24),ENSMUSG00000092243(Gm7030),ENSMUSG00000022901(Cd86),ENSMUSG00000024334(H2-Oa),ENSMUSG00000035929(H2-Q4),ENSMUSG00000…	ENSMUSG00000026012(Cd28),ENSMUSG00000062995(Ica1)	http://www.kegg.jp/kegg-bin/show_pathway?map04940/K04383%09%23FFFFFF,red/K03156%09%23FFFFFF,red/K06752%09%23FFFFFF,red/K05425%09%23FFFFFF,red/K04519%09%23FFFFFF,red/K06470%09%23FFFFFF,green/K04390%09%23FFFFFF,red/K05406%09%23FFFFFF,red/K06751%09%23FFFFFF,red/K05412%09%23FFFFFF,red/K19863%09%23FFFFFF,green/K05413%09%23FFFFFF,red/K05468%09%23FFFFFF,red/K07817%09%23FFFFFF,red/
mmu05165	Human papillomavirus infection	Human Diseases	Infectious diseases: Viral	66	23	89	349	0.00428971	0.0174374	ENSMUSG00000028945(Rheb),ENSMUSG00000042349(Ikbke),ENSMUSG00000035692(Isg15),ENSMUSG00000067212(H2-T23),ENSMUSG00000031925(Maml2),ENSMUSG00000024401(Tnf),ENSMUSG00000031503(Col4a2),ENSMUSG00000004936(Map2k1),ENSMUSG00000056116(H2-T22),ENSMUSG00000048806(Ifnb1),ENSMUSG00000026626(Ppp2r5a),ENSMUSG00000004221(Ikbkg),ENSMUSG00000026923(Notch1),ENSMUSG00000020122(Egfr),ENSMUSG00000092243(Gm7030),ENSMU…	ENSMUSG00000027111(Itga6),ENSMUSG00000044167(Foxo1),ENSMUSG00000024421(Lama3),ENSMUSG00000067071(Hes6),ENSMUSG00000031834(Pik3r2),ENSMUSG00000040289(Hey1),ENSMUSG00000005699(Pard6a),ENSMUSG00000025158(Rfng),ENSMUSG00000020888(Dvl2),ENSMUSG00000000881(Dlg3),ENSMUSG00000028238(Atp6v0d2),ENSMUSG00000061859(Patj),ENSMUSG00000002068(Ccne1),ENSMUSG00000020689(Itgb3),ENSMUSG00000070348(Ccnd1),ENSMUSG000…	http://www.kegg.jp/kegg-bin/show_pathway?map05165/K05948%09%23FFFFFF,green/K06052%09%23FFFFFF,red/K02091%09%23FFFFFF,red/K06625%09%23FFFFFF,red/K04368%09%23FFFFFF,red/K20994%09%23FFFFFF,red/K04361%09%23FFFFFF,red/K06483%09%23FFFFFF,red/K11584%09%23FFFFFF,red/K16195%09%23FFFFFF,red/K02353%09%23FFFFFF,green/K09087%09%23FFFFFF,green/K05130%09%23FFFFFF,red/K02150%09%23FFFFFF,red/K12159%09%23FFFFFF,re…
mmu05330	Allograft rejection	Human Diseases	Immune diseases	17	2	19	53	0.00435611	0.0174803	ENSMUSG00000073421(H2-Ab1),ENSMUSG00000027776(Il12a),ENSMUSG00000024778(Fas),ENSMUSG00000061232(H2-K1),ENSMUSG00000004296(Il12b),ENSMUSG00000075122(Cd80),ENSMUSG00000016283(H2-M2),ENSMUSG00000053835(H2-T24),ENSMUSG00000017652(Cd40),ENSMUSG00000016529(Il10),ENSMUSG00000092243(Gm7030),ENSMUSG00000022901(Cd86),ENSMUSG00000035929(H2-Q4),ENSMUSG00000024334(H2-Oa),ENSMUSG00000067212(H2-T23),ENSMUSG0000…	ENSMUSG00000026012(Cd28),ENSMUSG00000000869(Il4)	http://www.kegg.jp/kegg-bin/show_pathway?map05330/K06751%09%23FFFFFF,red/K03160%09%23FFFFFF,red/K05430%09%23FFFFFF,green/K05425%09%23FFFFFF,red/K05412%09%23FFFFFF,red/K05413%09%23FFFFFF,red/K06752%09%23FFFFFF,red/K05443%09%23FFFFFF,red/K05406%09%23FFFFFF,red/K06470%09%23FFFFFF,green/K03156%09%23FFFFFF,red/K04390%09%23FFFFFF,red/
mmu04012	ErbB signaling pathway	Environmental Information Processing	Signal transduction	19	8	27	84	0.00457636	0.0181316	ENSMUSG00000032475(Nck1),ENSMUSG00000004043(Stat5a),ENSMUSG00000002413(Braf),ENSMUSG00000022346(Myc),ENSMUSG00000020122(Egfr),ENSMUSG00000062991(Nrg1),ENSMUSG00000004936(Map2k1),ENSMUSG00000030602(Pak4),ENSMUSG00000021936(Mapk8),ENSMUSG00000052889(Prkcb),ENSMUSG00000017776(Crk),ENSMUSG00000053819(Camk2d),ENSMUSG00000000441(Raf1),ENSMUSG00000027646(Src),ENSMUSG00000032311(Nrg4),ENSMUSG00000029378(…	ENSMUSG00000020312(Shc2),ENSMUSG00000031714(Gab1),ENSMUSG00000016933(Plcg1),ENSMUSG00000031834(Pik3r2),ENSMUSG00000052684(Jun),ENSMUSG00000021820(Camk2g),ENSMUSG00000026842(Abl1),ENSMUSG00000035109(Shc4)	http://www.kegg.jp/kegg-bin/show_pathway?map04012/K05455%09%23FFFFFF,red/K09784%09%23FFFFFF,red/K07365%09%23FFFFFF,red/K04377%09%23FFFFFF,red/K04368%09%23FFFFFF,red/K05734%09%23FFFFFF,red/K05458%09%23FFFFFF,red/K02649%09%23FFFFFF,purple/K06625%09%23FFFFFF,red/K04438%09%23FFFFFF,red/K04366%09%23FFFFFF,red/K17449%09%23FFFFFF,green/K11223%09%23FFFFFF,red/K04365%09%23FFFFFF,red/K04361%09%23FFFFFF,red…
mmu04360	Axon guidance	Organismal Systems	Development	30	19	49	175	0.00476743	0.0186526	ENSMUSG00000024290(Rock1),ENSMUSG00000020121(Srgap1),ENSMUSG00000054855(Rnd1),ENSMUSG00000022092(Ppp3cc),ENSMUSG00000021904(Sema3g),ENSMUSG00000020580(Rock2),ENSMUSG00000026121(Sema4c),ENSMUSG00000032475(Nck1),ENSMUSG00000025809(Itgb1),ENSMUSG00000033220(Rac2),ENSMUSG00000059810(Rgs3),ENSMUSG00000030602(Pak4),ENSMUSG00000028064(Sema4a),ENSMUSG00000022687(Boc),ENSMUSG00000035513(Ntng2),ENSMUSG0000…	ENSMUSG00000037926(Ssh2),ENSMUSG00000001761(Smo),ENSMUSG00000029674(Limk1),ENSMUSG00000005699(Pard6a),ENSMUSG00000074785(Plxnc1),ENSMUSG00000041845(Rhod),ENSMUSG00000001227(Sema6b),ENSMUSG00000029869(Ephb6),ENSMUSG00000025020(Slit1),ENSMUSG00000016933(Plcg1),ENSMUSG00000031834(Pik3r2),ENSMUSG00000026842(Abl1),ENSMUSG00000021820(Camk2g),ENSMUSG00000031217(Efnb1),ENSMUSG00000056214(Pard6g),ENSMUSG0…	http://www.kegg.jp/kegg-bin/show_pathway?map04360/K16359%09%23FFFFFF,red/K06521%09%23FFFFFF,red/K07530%09%23FFFFFF,green/K05743%09%23FFFFFF,green/K04514%09%23FFFFFF,red/K05704%09%23FFFFFF,red/K07528%09%23FFFFFF,red/K20020%09%23FFFFFF,red/K17388%09%23FFFFFF,red/K07526%09%23FFFFFF,red/K06821%09%23FFFFFF,green/K04189%09%23FFFFFF,green/K06754%09%23FFFFFF,red/K04366%09%23FFFFFF,red/K06842%09%23FFFFFF,…
mmu04140	Autophagy - animal	Cellular Processes	Transport and catabolism	18	20	38	129	0.00489282	0.0189068	ENSMUSG00000030269(Mtmr14),ENSMUSG00000020108(Ddit4),ENSMUSG00000026031(Cflar),ENSMUSG00000004936(Map2k1),ENSMUSG00000079418(Atg4a),ENSMUSG00000021116(Eif2s1),ENSMUSG00000028945(Rheb),ENSMUSG00000021936(Mapk8),ENSMUSG00000021948(Prkcd),ENSMUSG00000021109(Hif1a),ENSMUSG00000018171(Vmp1),ENSMUSG00000020349(Ppp2ca),ENSMUSG00000009630(Ppp2cb),ENSMUSG00000000441(Raf1),ENSMUSG00000029471(Camkk2),ENSMUS…	ENSMUSG00000041658(Rragb),ENSMUSG00000030102(Itpr1),ENSMUSG00000004798(Ulk2),ENSMUSG00000030314(Atg7),ENSMUSG00000021619(Atg10),ENSMUSG00000031834(Pik3r2),ENSMUSG00000027244(Atg13),ENSMUSG00000028278(Rragd),ENSMUSG00000061455(Stx17),ENSMUSG00000029512(Ulk1),ENSMUSG00000022419(Deptor),ENSMUSG00000035629(Rubcn),ENSMUSG00000005102(Eif2ak4),ENSMUSG00000037526(Atg14),ENSMUSG00000035354(Uvrag),ENSMUSG0…	http://www.kegg.jp/kegg-bin/show_pathway?map04140/K03237%09%23FFFFFF,red/K04382%09%23FFFFFF,red/K07187%09%23FFFFFF,green/K16186%09%23FFFFFF,green/K16196%09%23FFFFFF,green/K17908%09%23FFFFFF,green/K08331%09%23FFFFFF,green/K21248%09%23FFFFFF,red/K08342%09%23FFFFFF,purple/K21249%09%23FFFFFF,green/K04366%09%23FFFFFF,red/K02649%09%23FFFFFF,purple/K07208%09%23FFFFFF,red/K04440%09%23FFFFFF,red/K08491%09…
mmu00062	Fatty acid elongation	Metabolism	Lipid metabolism	6	7	13	32	0.00519362	0.0198244	ENSMUSG00000028910(Mecr),ENSMUSG00000027195(Hsd17b12),ENSMUSG00000015474(Ppt2),ENSMUSG00000028937(Acot7),ENSMUSG00000035376(Hacd2),ENSMUSG00000038459(Abhd17c)	ENSMUSG00000032349(Elovl5),ENSMUSG00000021226(Acot2),ENSMUSG00000072949(Acot1),ENSMUSG00000027984(Hadh),ENSMUSG00000025465(Echs1),ENSMUSG00000036880(Acaa2),ENSMUSG00000028497(Hacd4)	http://www.kegg.jp/kegg-bin/show_pathway?map00062/K07508%09%23FFFFFF,green/K00022%09%23FFFFFF,green/K01076%09%23FFFFFF,red/K01068%09%23FFFFFF,green/K10251%09%23FFFFFF,red/K01074%09%23FFFFFF,red/K10703%09%23FFFFFF,purple/K07511%09%23FFFFFF,green/K10244%09%23FFFFFF,green/K07512%09%23FFFFFF,red/K17360%09%23FFFFFF,red/
mmu04670	Leukocyte transendothelial migration	Organismal Systems	Immune system	28	6	34	114	0.00608547	0.0229488	ENSMUSG00000024290(Rock1),ENSMUSG00000053062(Jam2),ENSMUSG00000053436(Mapk14),ENSMUSG00000052397(Ezr),ENSMUSG00000037405(Icam1),ENSMUSG00000020580(Rock2),ENSMUSG00000030830(Itgal),ENSMUSG00000031207(Msn),ENSMUSG00000025809(Itgb1),ENSMUSG00000033220(Rac2),ENSMUSG00000071715(Ncf4),ENSMUSG00000052889(Prkcb),ENSMUSG00000029580(Actb),ENSMUSG00000038235(F11r),ENSMUSG00000058230(Arhgap35),ENSMUSG0000003…	ENSMUSG00000026430(Rassf5),ENSMUSG00000016933(Plcg1),ENSMUSG00000031834(Pik3r2),ENSMUSG00000029204(Rhoh),ENSMUSG00000022469(Rapgef3),ENSMUSG00000045382(Cxcr4)	http://www.kegg.jp/kegg-bin/show_pathway?map04670/K07836%09%23FFFFFF,red/K01403%09%23FFFFFF,red/K21421%09%23FFFFFF,red/K06527%09%23FFFFFF,red/K04514%09%23FFFFFF,red/K05692%09%23FFFFFF,red/K08012%09%23FFFFFF,red/K19662%09%23FFFFFF,red/K07873%09%23FFFFFF,green/K06490%09%23FFFFFF,red/K06089%09%23FFFFFF,red/K05719%09%23FFFFFF,red/K08007%09%23FFFFFF,red/K04441%09%23FFFFFF,red/K05700%09%23FFFFFF,red/K0…
mmu03460	Fanconi anemia pathway	Genetic Information Processing	Replication and repair	2	16	18	51	0.00655373	0.0244205	ENSMUSG00000024170(Telo2),ENSMUSG00000032512(Wdr48)	ENSMUSG00000059772(Slx1b),ENSMUSG00000000751(Rpa1),ENSMUSG00000092118(Fancf),ENSMUSG00000019841(Rev3l),ENSMUSG00000032498(Mlh1),ENSMUSG00000044702(Palb2),ENSMUSG00000017146(Brca1),ENSMUSG00000041147(Brca2),ENSMUSG00000012483(Rpa3),ENSMUSG00000038425(Poli),ENSMUSG00000030528(Blm),ENSMUSG00000028453(Fancg),ENSMUSG00000021668(Polk),ENSMUSG00000007570(Fance),ENSMUSG00000079109(Pms2),ENSMUSG0000003345…	http://www.kegg.jp/kegg-bin/show_pathway?map03460/K10740%09%23FFFFFF,green/K10901%09%23FFFFFF,green/K15363%09%23FFFFFF,green/K08775%09%23FFFFFF,green/K10892%09%23FFFFFF,green/K02350%09%23FFFFFF,green/K08734%09%23FFFFFF,green/K07466%09%23FFFFFF,green/K10894%09%23FFFFFF,green/K15078%09%23FFFFFF,green/K10605%09%23FFFFFF,green/K03510%09%23FFFFFF,green/K10893%09%23FFFFFF,green/K10858%09%23FFFFFF,green…
mmu04216	Ferroptosis	Cellular Processes	Cell growth and death	12	3	15	40	0.0067118	0.0247152	ENSMUSG00000022094(Slc39a14),ENSMUSG00000031278(Acsl4),ENSMUSG00000018796(Acsl1),ENSMUSG00000005413(Hmox1),ENSMUSG00000027610(Gss),ENSMUSG00000023030(Slc11a2),ENSMUSG00000028124(Gclm),ENSMUSG00000008892(Vdac3),ENSMUSG00000024981(Acsl5),ENSMUSG00000003617(Cp),ENSMUSG00000027737(Slc7a11),ENSMUSG00000015340(Cybb)	ENSMUSG00000026389(Steap3),ENSMUSG00000030314(Atg7),ENSMUSG00000025993(Slc40a1)	http://www.kegg.jp/kegg-bin/show_pathway?map04216/K01897%09%23FFFFFF,red/K14685%09%23FFFFFF,green/K00510%09%23FFFFFF,red/K15041%09%23FFFFFF,red/K14720%09%23FFFFFF,red/K11205%09%23FFFFFF,red/K13624%09%23FFFFFF,red/K13869%09%23FFFFFF,red/K21398%09%23FFFFFF,red/K10142%09%23FFFFFF,green/K21456%09%23FFFFFF,red/K21421%09%23FFFFFF,red/K08337%09%23FFFFFF,green/
mmu05215	Prostate cancer	Human Diseases	Cancers: Specific types	16	13	29	95	0.00759562	0.0276445	ENSMUSG00000021270(Hsp90aa1),ENSMUSG00000053007(Creb5),ENSMUSG00000041417(Pik3r1),ENSMUSG00000028163(Nfkb1),ENSMUSG00000023067(Cdkn1a),ENSMUSG00000021025(Nfkbia),ENSMUSG00000017737(Mmp9),ENSMUSG00000000441(Raf1),ENSMUSG00000004221(Ikbkg),ENSMUSG00000020122(Egfr),ENSMUSG00000002413(Braf),ENSMUSG00000024927(Rela),ENSMUSG00000043613(Mmp3),ENSMUSG00000000385(Tmprss2),ENSMUSG00000024620(Pdgfrb),ENSMUS…	ENSMUSG00000025358(Cdk2),ENSMUSG00000027315(Spint1),ENSMUSG00000038648(Creb3l2),ENSMUSG00000022105(Rb1),ENSMUSG00000025856(Pdgfa),ENSMUSG00000028914(Casp9),ENSMUSG00000070348(Ccnd1),ENSMUSG00000028019(Pdgfc),ENSMUSG00000002068(Ccne1),ENSMUSG00000044167(Foxo1),ENSMUSG00000018983(E2f2),ENSMUSG00000031834(Pik3r2),ENSMUSG00000031565(Fgfr1)	http://www.kegg.jp/kegg-bin/show_pathway?map05215/K04366%09%23FFFFFF,red/K15619%09%23FFFFFF,green/K09048%09%23FFFFFF,green/K01403%09%23FFFFFF,red/K06625%09%23FFFFFF,red/K04503%09%23FFFFFF,green/K02580%09%23FFFFFF,red/K09633%09%23FFFFFF,red/K07210%09%23FFFFFF,red/K04735%09%23FFFFFF,red/K04365%09%23FFFFFF,red/K01394%09%23FFFFFF,red/K06626%09%23FFFFFF,green/K05089%09%23FFFFFF,red/K04368%09%23FFFFFF,…
mmu04919	Thyroid hormone signaling pathway	Organismal Systems	Endocrine system	18	15	33	112	0.00829157	0.0298306	ENSMUSG00000034297(Med13),ENSMUSG00000026799(Med27),ENSMUSG00000021109(Hif1a),ENSMUSG00000062825(Actg1),ENSMUSG00000041417(Pik3r1),ENSMUSG00000028800(Hdac1),ENSMUSG00000019838(Slc16a10),ENSMUSG00000028645(Slc2a1),ENSMUSG00000027646(Src),ENSMUSG00000000441(Raf1),ENSMUSG00000026923(Notch1),ENSMUSG00000027878(Notch2),ENSMUSG00000022346(Myc),ENSMUSG00000026104(Stat1),ENSMUSG00000052889(Prkcb),ENSMUSG…	ENSMUSG00000019768(Esr1),ENSMUSG00000020937(Plcd3),ENSMUSG00000028914(Casp9),ENSMUSG00000026409(Pfkfb2),ENSMUSG00000070348(Ccnd1),ENSMUSG00000020689(Itgb3),ENSMUSG00000040061(Plcb2),ENSMUSG00000015846(Rxra),ENSMUSG00000020647(Ncoa1),ENSMUSG00000044167(Foxo1),ENSMUSG00000033083(Tbc1d4),ENSMUSG00000007682(Dio2),ENSMUSG00000031834(Pik3r2),ENSMUSG00000056476(Med12l),ENSMUSG00000016933(Plcg1)	http://www.kegg.jp/kegg-bin/show_pathway?map04919/K20994%09%23FFFFFF,red/K15164%09%23FFFFFF,red/K04399%09%23FFFFFF,green/K05704%09%23FFFFFF,red/K07299%09%23FFFFFF,red/K17904%09%23FFFFFF,green/K04368%09%23FFFFFF,red/K09101%09%23FFFFFF,green/K08550%09%23FFFFFF,green/K08524%09%23FFFFFF,green/K07208%09%23FFFFFF,red/K19662%09%23FFFFFF,red/K01116%09%23FFFFFF,green/K15162%09%23FFFFFF,green/K04366%09%23F…
mmu00240	Pyrimidine metabolism	Metabolism	Nucleotide metabolism	8	11	19	56	0.00853922	0.0303724	ENSMUSG00000028633(Ctps),ENSMUSG00000029366(Dck),ENSMUSG00000068417(Pnp2),ENSMUSG00000054958(Nt5c1a),ENSMUSG00000115338(Pnp),ENSMUSG00000020638(Cmpk2),ENSMUSG00000020407(Upp1),ENSMUSG00000025747(Tyms)	ENSMUSG00000024177(Nme4),ENSMUSG00000020649(Rrm2),ENSMUSG00000021236(Entpd5),ENSMUSG00000033068(Entpd6),ENSMUSG00000073016(Uprt),ENSMUSG00000035824(Tk2),ENSMUSG00000027203(Dut),ENSMUSG00000037370(Enpp1),ENSMUSG00000048120(Entpd1),ENSMUSG00000022814(Umps),ENSMUSG00000025041(Nt5c2)	http://www.kegg.jp/kegg-bin/show_pathway?map00240/K00761%09%23FFFFFF,green/K01081%09%23FFFFFF,purple/K00857%09%23FFFFFF,green/K01510%09%23FFFFFF,green/K13421%09%23FFFFFF,green/K01511%09%23FFFFFF,green/K00560%09%23FFFFFF,red/K00893%09%23FFFFFF,red/K01937%09%23FFFFFF,red/K10808%09%23FFFFFF,green/K00940%09%23FFFFFF,green/K03783%09%23FFFFFF,red/K01513%09%23FFFFFF,green/K13809%09%23FFFFFF,red/K01520%0…
mmu04926	Relaxin signaling pathway	Organismal Systems	Endocrine system	22	15	37	129	0.00865132	0.0304254	ENSMUSG00000021936(Mapk8),ENSMUSG00000031503(Col4a2),ENSMUSG00000004936(Map2k1),ENSMUSG00000024927(Rela),ENSMUSG00000053436(Mapk14),ENSMUSG00000020122(Egfr),ENSMUSG00000041620(Mmp1b),ENSMUSG00000022122(Ednrb),ENSMUSG00000028163(Nfkb1),ENSMUSG00000021025(Nfkbia),ENSMUSG00000021367(Edn1),ENSMUSG00000041417(Pik3r1),ENSMUSG00000017737(Mmp9),ENSMUSG00000020826(Nos2),ENSMUSG00000000441(Raf1),ENSMUSG000…	ENSMUSG00000043004(Gng2),ENSMUSG00000032192(Gnb5),ENSMUSG00000031834(Pik3r2),ENSMUSG00000021250(Fos),ENSMUSG00000020312(Shc2),ENSMUSG00000032766(Gng11),ENSMUSG00000035109(Shc4),ENSMUSG00000020654(Adcy3),ENSMUSG00000040061(Plcb2),ENSMUSG00000052684(Jun),ENSMUSG00000024962(Vegfb),ENSMUSG00000038648(Creb3l2),ENSMUSG00000032440(Tgfbr2),ENSMUSG00000048240(Gng7),ENSMUSG00000005580(Adcy9)	http://www.kegg.jp/kegg-bin/show_pathway?map04926/K04448%09%23FFFFFF,green/K04388%09%23FFFFFF,green/K09048%09%23FFFFFF,green/K04735%09%23FFFFFF,red/K08049%09%23FFFFFF,green/K04543%09%23FFFFFF,green/K04368%09%23FFFFFF,red/K05858%09%23FFFFFF,green/K02649%09%23FFFFFF,purple/K13241%09%23FFFFFF,red/K07994%09%23FFFFFF,red/K16366%09%23FFFFFF,red/K08043%09%23FFFFFF,green/K04536%09%23FFFFFF,red/K04366%09%…
mmu04611	Platelet activation	Organismal Systems	Immune system	25	10	35	122	0.0104102	0.0358065	ENSMUSG00000043017(Ptgir),ENSMUSG00000041417(Pik3r1),ENSMUSG00000046207(Pik3r6),ENSMUSG00000020901(Pik3r5),ENSMUSG00000021457(Syk),ENSMUSG00000027646(Src),ENSMUSG00000056220(Pla2g4a),ENSMUSG00000014956(Ppp1cb),ENSMUSG00000062825(Actg1),ENSMUSG00000024639(Gnaq),ENSMUSG00000026786(Apbb1ip),ENSMUSG00000052681(Rap1b),ENSMUSG00000020573(Pik3cg),ENSMUSG00000053137(Mapk11),ENSMUSG00000058230(Arhgap35),E…	ENSMUSG00000020689(Itgb3),ENSMUSG00000040061(Plcb2),ENSMUSG00000020654(Adcy3),ENSMUSG00000042644(Itpr3),ENSMUSG00000036353(P2ry12),ENSMUSG00000005580(Adcy9),ENSMUSG00000027765(P2ry1),ENSMUSG00000031834(Pik3r2),ENSMUSG00000047250(Ptgs1),ENSMUSG00000030102(Itpr1)	http://www.kegg.jp/kegg-bin/show_pathway?map04611/K07836%09%23FFFFFF,red/K02649%09%23FFFFFF,purple/K17388%09%23FFFFFF,red/K04270%09%23FFFFFF,green/K05692%09%23FFFFFF,red/K17704%09%23FFFFFF,red/K07361%09%23FFFFFF,red/K03914%09%23FFFFFF,red/K05704%09%23FFFFFF,red/K04263%09%23FFFFFF,red/K05858%09%23FFFFFF,green/K16342%09%23FFFFFF,red/K05732%09%23FFFFFF,red/K00509%09%23FFFFFF,green/K05719%09%23FFFFFF…
mmu04110	Cell cycle	Cellular Processes	Cell growth and death	13	22	35	122	0.0104102	0.0358065	ENSMUSG00000032477(Cdc25a),ENSMUSG00000020415(Pttg1),ENSMUSG00000022346(Myc),ENSMUSG00000006215(Zbtb17),ENSMUSG00000023067(Cdkn1a),ENSMUSG00000028800(Hdac1),ENSMUSG00000000184(Ccnd2),ENSMUSG00000026761(Orc4),ENSMUSG00000040274(Cdk6),ENSMUSG00000073802(Cdkn2b),ENSMUSG00000015312(Gadd45b),ENSMUSG00000029910(Mad2l1),ENSMUSG00000022285(Ywhaz)	ENSMUSG00000018983(E2f2),ENSMUSG00000000028(Cdc45),ENSMUSG00000028551(Cdkn2c),ENSMUSG00000026355(Mcm6),ENSMUSG00000022673(Mcm4),ENSMUSG00000021253(Tgfb3),ENSMUSG00000029521(Chek2),ENSMUSG00000021453(Gadd45g),ENSMUSG00000002068(Ccne1),ENSMUSG00000031016(Wee1),ENSMUSG00000033102(Cdc14b),ENSMUSG00000070348(Ccnd1),ENSMUSG00000029730(Mcm7),ENSMUSG00000054115(Skp2),ENSMUSG00000032411(Tfdp2),ENSMUSG0000…	http://www.kegg.jp/kegg-bin/show_pathway?map04110/K02091%09%23FFFFFF,red/K02537%09%23FFFFFF,red/K06637%09%23FFFFFF,green/K02206%09%23FFFFFF,green/K02210%09%23FFFFFF,green/K06626%09%23FFFFFF,green/K06632%09%23FFFFFF,green/K02606%09%23FFFFFF,red/K02542%09%23FFFFFF,green/K04685%09%23FFFFFF,red/K06642%09%23FFFFFF,green/K10500%09%23FFFFFF,red/K16197%09%23FFFFFF,red/K06618%09%23FFFFFF,green/K06639%09%2…
mmu04217	Necroptosis	Cellular Processes	Cell growth and death	40	7	47	174	0.0113222	0.03852	ENSMUSG00000019850(Tnfaip3),ENSMUSG00000024778(Fas),ENSMUSG00000026942(Traf2),ENSMUSG00000056220(Pla2g4a),ENSMUSG00000022074(Tnfrsf10b),ENSMUSG00000037894(H2az1),ENSMUSG00000025888(Casp1),ENSMUSG00000032175(Tyk2),ENSMUSG00000021270(Hsp90aa1),ENSMUSG00000022967(Ifnar1),ENSMUSG00000031639(Tlr3),ENSMUSG00000027399(Il1a),ENSMUSG00000038467(Chmp4b),ENSMUSG00000015340(Cybb),ENSMUSG00000027398(Il1b),ENS…	ENSMUSG00000021820(Camk2g),ENSMUSG00000033059(Pygb),ENSMUSG00000037049(Smpd1),ENSMUSG00000041126(H2az2),ENSMUSG00000033594(Spata2l),ENSMUSG00000026473(Glul),ENSMUSG00000039005(Tlr4)	http://www.kegg.jp/kegg-bin/show_pathway?map04217/K03156%09%23FFFFFF,red/K05401%09%23FFFFFF,red/K04693%09%23FFFFFF,red/K12965%09%23FFFFFF,red/K11219%09%23FFFFFF,red/K11859%09%23FFFFFF,red/K04722%09%23FFFFFF,red/K05409%09%23FFFFFF,red/K04383%09%23FFFFFF,red/K03173%09%23FFFFFF,red/K21421%09%23FFFFFF,red/K04447%09%23FFFFFF,red/K05842%09%23FFFFFF,red/K04692%09%23FFFFFF,red/K00688%09%23FFFFFF,green/K1…
mmu05332	Graft-versus-host disease	Human Diseases	Immune diseases	16	1	17	50	0.0121994	0.0410582	ENSMUSG00000024401(Tnf),ENSMUSG00000056116(H2-T22),ENSMUSG00000067212(H2-T23),ENSMUSG00000024334(H2-Oa),ENSMUSG00000035929(H2-Q4),ENSMUSG00000022901(Cd86),ENSMUSG00000092243(Gm7030),ENSMUSG00000053835(H2-T24),ENSMUSG00000016283(H2-M2),ENSMUSG00000027398(Il1b),ENSMUSG00000075122(Cd80),ENSMUSG00000061232(H2-K1),ENSMUSG00000024778(Fas),ENSMUSG00000027399(Il1a),ENSMUSG00000073421(H2-Ab1),ENSMUSG00000…	ENSMUSG00000026012(Cd28)	http://www.kegg.jp/kegg-bin/show_pathway?map05332/K04383%09%23FFFFFF,red/K04519%09%23FFFFFF,red/K06751%09%23FFFFFF,red/K03156%09%23FFFFFF,red/K05413%09%23FFFFFF,red/K06470%09%23FFFFFF,green/K05412%09%23FFFFFF,red/K05405%09%23FFFFFF,red/K04390%09%23FFFFFF,red/K06752%09%23FFFFFF,red/
mmu04810	Regulation of actin cytoskeleton	Cellular Processes	Cell motility	40	15	55	210	0.0125455	0.0417739	ENSMUSG00000017776(Crk),ENSMUSG00000036402(Gng12),ENSMUSG00000000555(Itga5),ENSMUSG00000039115(Itga9),ENSMUSG00000028126(Pip5k1a),ENSMUSG00000062825(Actg1),ENSMUSG00000014956(Ppp1cb),ENSMUSG00000026782(Abi2),ENSMUSG00000055723(Rras2),ENSMUSG00000042284(Itga1),ENSMUSG00000027009(Itga4),ENSMUSG00000038387(Rras),ENSMUSG00000041417(Pik3r1),ENSMUSG00000049929(Lpar4),ENSMUSG00000000441(Raf1),ENSMUSG000…	ENSMUSG00000022817(Itgb5),ENSMUSG00000020689(Itgb3),ENSMUSG00000025856(Pdgfa),ENSMUSG00000037509(Arhgef4),ENSMUSG00000067714(Lpar5),ENSMUSG00000045382(Cxcr4),ENSMUSG00000028019(Pdgfc),ENSMUSG00000037926(Ssh2),ENSMUSG00000029674(Limk1),ENSMUSG00000025372(Baiap2),ENSMUSG00000000149(Gna12),ENSMUSG00000027111(Itga6),ENSMUSG00000027805(Pfn2),ENSMUSG00000031565(Fgfr1),ENSMUSG00000031834(Pik3r2)	http://www.kegg.jp/kegg-bin/show_pathway?map04810/K04189%09%23FFFFFF,green/K06585%09%23FFFFFF,red/K05692%09%23FFFFFF,red/K04438%09%23FFFFFF,red/K06485%09%23FFFFFF,green/K05450%09%23FFFFFF,green/K06591%09%23FFFFFF,red/K06483%09%23FFFFFF,red/K17388%09%23FFFFFF,red/K05700%09%23FFFFFF,red/K05704%09%23FFFFFF,red/K06493%09%23FFFFFF,green/K05763%09%23FFFFFF,red/K04347%09%23FFFFFF,red/K05089%09%23FFFFFF,…
mmu03410	Base excision repair	Genetic Information Processing	Replication and repair	1	11	12	32	0.014649	0.0482647	ENSMUSG00000034674(Tdg)	ENSMUSG00000035121(Neil2),ENSMUSG00000029591(Ung),ENSMUSG00000030322(Mbd4),ENSMUSG00000038644(Pold1),ENSMUSG00000032298(Neil1),ENSMUSG00000024854(Pold4),ENSMUSG00000051768(Xrcc1),ENSMUSG00000056394(Lig1),ENSMUSG00000007080(Pole),ENSMUSG00000020287(Mpg),ENSMUSG00000035960(Apex1)	http://www.kegg.jp/kegg-bin/show_pathway?map03410/K10803%09%23FFFFFF,green/K10801%09%23FFFFFF,green/K03505%09%23FFFFFF,green/K03652%09%23FFFFFF,green/K20813%09%23FFFFFF,red/K10747%09%23FFFFFF,green/K02324%09%23FFFFFF,green/K10568%09%23FFFFFF,green/K02327%09%23FFFFFF,green/K10771%09%23FFFFFF,green/K03648%09%23FFFFFF,green/K10567%09%23FFFFFF,green/
mmu04612	Antigen processing and presentation	Organismal Systems	Immune system	24	0	24	79	0.0151711	0.0494641	ENSMUSG00000005774(Rfx5),ENSMUSG00000079197(Psme2),ENSMUSG00000078153(Psme2b),ENSMUSG00000016283(H2-M2),ENSMUSG00000022504(Ciita),ENSMUSG00000020248(Nfyb),ENSMUSG00000022216(Psme1),ENSMUSG00000061232(H2-K1),ENSMUSG00000091971(Hspa1a),ENSMUSG00000021270(Hsp90aa1),ENSMUSG00000073421(H2-Ab1),ENSMUSG00000090877(Hspa1b),ENSMUSG00000078652(Psme3),ENSMUSG00000024308(Tapbp),ENSMUSG00000037321(Tap1),ENSMU…	-	http://www.kegg.jp/kegg-bin/show_pathway?map04612/K05654%09%23FFFFFF,red/K08061%09%23FFFFFF,red/K08060%09%23FFFFFF,red/K08055%09%23FFFFFF,red/K08065%09%23FFFFFF,red/K08058%09%23FFFFFF,red/K03283%09%23FFFFFF,red/K06751%09%23FFFFFF,red/K04079%09%23FFFFFF,red/K06698%09%23FFFFFF,red/K03156%09%23FFFFFF,red/K06697%09%23FFFFFF,red/K06752%09%23FFFFFF,red/K05653%09%23FFFFFF,red/K06696%09%23FFFFFF,red/
mmu04137	Mitophagy - animal	Cellular Processes	Transport and catabolism	10	10	20	63	0.0155511	0.050118	ENSMUSG00000021109(Hif1a),ENSMUSG00000039910(Cited2),ENSMUSG00000038387(Rras),ENSMUSG00000055723(Rras2),ENSMUSG00000027646(Src),ENSMUSG00000020115(Tbk1),ENSMUSG00000024927(Rela),ENSMUSG00000035158(Mitf),ENSMUSG00000015837(Sqstm1),ENSMUSG00000021936(Mapk8)	ENSMUSG00000052688(Rab7b),ENSMUSG00000052684(Jun),ENSMUSG00000029512(Ulk1),ENSMUSG00000023990(Tfeb),ENSMUSG00000023826(Prkn),ENSMUSG00000017119(Nbr1),ENSMUSG00000022051(Bnip3l),ENSMUSG00000038520(Tbc1d17),ENSMUSG00000028756(Pink1),ENSMUSG00000048756(Foxo3)	http://www.kegg.jp/kegg-bin/show_pathway?map04137/K04556%09%23FFFFFF,green/K19945%09%23FFFFFF,green/K05704%09%23FFFFFF,red/K05688%09%23FFFFFF,green/K14381%09%23FFFFFF,red/K09408%09%23FFFFFF,green/K08268%09%23FFFFFF,red/K05410%09%23FFFFFF,red/K21357%09%23FFFFFF,green/K07829%09%23FFFFFF,red/K04440%09%23FFFFFF,red/K04735%09%23FFFFFF,red/K15465%09%23FFFFFF,green/K15590%09%23FFFFFF,green/K17987%09%23F…
mmu04921	Oxytocin signaling pathway	Organismal Systems	Endocrine system	24	17	41	151	0.0156919	0.050118	ENSMUSG00000032487(Ptgs2),ENSMUSG00000014956(Ppp1cb),ENSMUSG00000053395(Cacng8),ENSMUSG00000062825(Actg1),ENSMUSG00000024639(Gnaq),ENSMUSG00000020573(Pik3cg),ENSMUSG00000056220(Pla2g4a),ENSMUSG00000001175(Calm1),ENSMUSG00000029084(Cd38),ENSMUSG00000027646(Src),ENSMUSG00000053819(Camk2d),ENSMUSG00000000441(Raf1),ENSMUSG00000029471(Camkk2),ENSMUSG00000046207(Pik3r6),ENSMUSG00000023067(Cdkn1a),ENSMU…	ENSMUSG00000005580(Adcy9),ENSMUSG00000026360(Rgs2),ENSMUSG00000021820(Camk2g),ENSMUSG00000052684(Jun),ENSMUSG00000020654(Adcy3),ENSMUSG00000040061(Plcb2),ENSMUSG00000042644(Itpr3),ENSMUSG00000027544(Nfatc2),ENSMUSG00000005583(Mef2c),ENSMUSG00000015968(Cacna1d),ENSMUSG00000030272(Camk1),ENSMUSG00000070348(Ccnd1),ENSMUSG00000028944(Prkag2),ENSMUSG00000030102(Itpr1),ENSMUSG00000021250(Fos),ENSMUSG00…	http://www.kegg.jp/kegg-bin/show_pathway?map04921/K04348%09%23FFFFFF,red/K04448%09%23FFFFFF,green/K04361%09%23FFFFFF,red/K04454%09%23FFFFFF,green/K06269%09%23FFFFFF,red/K18154%09%23FFFFFF,green/K04514%09%23FFFFFF,red/K02183%09%23FFFFFF,red/K08043%09%23FFFFFF,green/K11987%09%23FFFFFF,red/K04503%09%23FFFFFF,green/K08292%09%23FFFFFF,green/K05858%09%23FFFFFF,green/K08794%09%23FFFFFF,green/K17332%09%2…
mmu05225	Hepatocellular carcinoma	Human Diseases	Cancers: Specific types	24	21	45	169	0.0167341	0.0529069	ENSMUSG00000062825(Actg1),ENSMUSG00000045005(Fzd5),ENSMUSG00000015312(Gadd45b),ENSMUSG00000044674(Fzd1),ENSMUSG00000000441(Raf1),ENSMUSG00000040274(Cdk6),ENSMUSG00000015957(Wnt11),ENSMUSG00000033227(Wnt6),ENSMUSG00000023067(Cdkn1a),ENSMUSG00000001663(Gstt1),ENSMUSG00000009376(Met),ENSMUSG00000003849(Nqo1),ENSMUSG00000041417(Pik3r1),ENSMUSG00000020250(Txnrd1),ENSMUSG00000037935(Smarce1),ENSMUSG000…	ENSMUSG00000032440(Tgfbr2),ENSMUSG00000047604(Frat2),ENSMUSG00000022105(Rb1),ENSMUSG00000002109(Ddb2),ENSMUSG00000067199(Frat1),ENSMUSG00000035109(Shc4),ENSMUSG00000070348(Ccnd1),ENSMUSG00000028864(Hgf),ENSMUSG00000020312(Shc2),ENSMUSG00000024921(Smarca2),ENSMUSG00000031714(Gab1),ENSMUSG00000021668(Polk),ENSMUSG00000021453(Gadd45g),ENSMUSG00000033318(Gstt2),ENSMUSG00000020888(Dvl2),ENSMUSG0000001…	http://www.kegg.jp/kegg-bin/show_pathway?map05225/K04365%09%23FFFFFF,red/K02353%09%23FFFFFF,green/K04402%09%23FFFFFF,purple/K05460%09%23FFFFFF,green/K17449%09%23FFFFFF,green/K11651%09%23FFFFFF,red/K04377%09%23FFFFFF,red/K04366%09%23FFFFFF,red/K03096%09%23FFFFFF,green/K01384%09%23FFFFFF,red/K03511%09%23FFFFFF,green/K03068%09%23FFFFFF,green/K03069%09%23FFFFFF,green/K00510%09%23FFFFFF,red/K09593%09%…
mmu04666	Fc gamma R-mediated phagocytosis	Organismal Systems	Immune system	19	5	24	80	0.0177328	0.0555038	ENSMUSG00000030403(Vasp),ENSMUSG00000069662(Marcks),ENSMUSG00000004936(Map2k1),ENSMUSG00000026395(Ptprc),ENSMUSG00000052889(Prkcb),ENSMUSG00000021759(Plpp1),ENSMUSG00000033220(Rac2),ENSMUSG00000021948(Prkcd),ENSMUSG00000022377(Asap1),ENSMUSG00000042228(Lyn),ENSMUSG00000022272(Myo10),ENSMUSG00000047945(Marcksl1),ENSMUSG00000021457(Syk),ENSMUSG00000026656(Fcgr2b),ENSMUSG00000000441(Raf1),ENSMUSG000…	ENSMUSG00000031834(Pik3r2),ENSMUSG00000016933(Plcg1),ENSMUSG00000026288(Inpp5d),ENSMUSG00000029674(Limk1),ENSMUSG00000036995(Asap3)	http://www.kegg.jp/kegg-bin/show_pathway?map04666/K05854%09%23FFFFFF,red/K01116%09%23FFFFFF,green/K06274%09%23FFFFFF,red/K06478%09%23FFFFFF,red/K03084%09%23FFFFFF,green/K12560%09%23FFFFFF,red/K07860%09%23FFFFFF,red/K19662%09%23FFFFFF,red/K04368%09%23FFFFFF,red/K01080%09%23FFFFFF,red/K06068%09%23FFFFFF,red/K12559%09%23FFFFFF,red/K12561%09%23FFFFFF,red/K05743%09%23FFFFFF,green/K00889%09%23FFFFFF,re…
mmu05218	Melanoma	Human Diseases	Cancers: Specific types	11	11	22	72	0.0182473	0.0565486	ENSMUSG00000004936(Map2k1),ENSMUSG00000024620(Pdgfrb),ENSMUSG00000020122(Egfr),ENSMUSG00000002413(Braf),ENSMUSG00000035158(Mitf),ENSMUSG00000040274(Cdk6),ENSMUSG00000000441(Raf1),ENSMUSG00000041417(Pik3r1),ENSMUSG00000009376(Met),ENSMUSG00000023067(Cdkn1a),ENSMUSG00000015312(Gadd45b)	ENSMUSG00000031565(Fgfr1),ENSMUSG00000031834(Pik3r2),ENSMUSG00000018983(E2f2),ENSMUSG00000021453(Gadd45g),ENSMUSG00000028019(Pdgfc),ENSMUSG00000021668(Polk),ENSMUSG00000028864(Hgf),ENSMUSG00000025856(Pdgfa),ENSMUSG00000070348(Ccnd1),ENSMUSG00000022105(Rb1),ENSMUSG00000002109(Ddb2)	http://www.kegg.jp/kegg-bin/show_pathway?map05218/K04402%09%23FFFFFF,purple/K04359%09%23FFFFFF,green/K04366%09%23FFFFFF,red/K05460%09%23FFFFFF,green/K04365%09%23FFFFFF,red/K05099%09%23FFFFFF,red/K09389%09%23FFFFFF,green/K04361%09%23FFFFFF,red/K04503%09%23FFFFFF,green/K05089%09%23FFFFFF,red/K06618%09%23FFFFFF,green/K02091%09%23FFFFFF,red/K09455%09%23FFFFFF,red/K05450%09%23FFFFFF,green/K03511%09%23…
mmu00760	Nicotinate and nicotinamide metabolism	Metabolism	Metabolism of cofactors and vitamins	8	4	12	33	0.018991	0.0582763	ENSMUSG00000063558(Aox1),ENSMUSG00000054958(Nt5c1a),ENSMUSG00000020572(Nampt),ENSMUSG00000115338(Pnp),ENSMUSG00000029063(Nadk),ENSMUSG00000068417(Pnp2),ENSMUSG00000029084(Cd38),ENSMUSG00000029082(Bst1)	ENSMUSG00000022253(Nadk2),ENSMUSG00000025041(Nt5c2),ENSMUSG00000022574(Naprt),ENSMUSG00000037370(Enpp1)	http://www.kegg.jp/kegg-bin/show_pathway?map00760/K03783%09%23FFFFFF,red/K00858%09%23FFFFFF,purple/K01081%09%23FFFFFF,purple/K01513%09%23FFFFFF,green/K03462%09%23FFFFFF,red/K18152%09%23FFFFFF,red/K00763%09%23FFFFFF,green/K01242%09%23FFFFFF,red/K00157%09%23FFFFFF,red/
mmu01522	Endocrine resistance	Human Diseases	Drug resistance: Antineoplastic	15	12	27	93	0.0192467	0.0584877	ENSMUSG00000027646(Src),ENSMUSG00000017737(Mmp9),ENSMUSG00000000441(Raf1),ENSMUSG00000041417(Pik3r1),ENSMUSG00000023067(Cdkn1a),ENSMUSG00000053137(Mapk11),ENSMUSG00000014773(Dll1),ENSMUSG00000004936(Map2k1),ENSMUSG00000021936(Mapk8),ENSMUSG00000027276(Jag1),ENSMUSG00000026923(Notch1),ENSMUSG00000020122(Egfr),ENSMUSG00000002413(Braf),ENSMUSG00000027878(Notch2),ENSMUSG00000053436(Mapk14)	ENSMUSG00000020654(Adcy3),ENSMUSG00000035109(Shc4),ENSMUSG00000070348(Ccnd1),ENSMUSG00000005580(Adcy9),ENSMUSG00000022105(Rb1),ENSMUSG00000052684(Jun),ENSMUSG00000019768(Esr1),ENSMUSG00000031834(Pik3r2),ENSMUSG00000028551(Cdkn2c),ENSMUSG00000018983(E2f2),ENSMUSG00000020312(Shc2),ENSMUSG00000021250(Fos)	http://www.kegg.jp/kegg-bin/show_pathway?map01522/K06052%09%23FFFFFF,red/K06618%09%23FFFFFF,green/K17449%09%23FFFFFF,green/K02599%09%23FFFFFF,red/K04440%09%23FFFFFF,red/K04448%09%23FFFFFF,green/K04368%09%23FFFFFF,red/K08049%09%23FFFFFF,green/K06625%09%23FFFFFF,red/K02649%09%23FFFFFF,purple/K06622%09%23FFFFFF,green/K04379%09%23FFFFFF,green/K06051%09%23FFFFFF,red/K05704%09%23FFFFFF,red/K09389%09%23…
mmu00100	Steroid biosynthesis	Metabolism	Lipid metabolism	6	2	8	19	0.0211264	0.0635825	ENSMUSG00000001467(Cyp51),ENSMUSG00000022351(Sqle),ENSMUSG00000021273(Fdft1),ENSMUSG00000034926(Dhcr24),ENSMUSG00000032018(Sc5d),ENSMUSG00000026675(Hsd17b7)	ENSMUSG00000026600(Soat1),ENSMUSG00000058454(Dhcr7)	http://www.kegg.jp/kegg-bin/show_pathway?map00100/K00227%09%23FFFFFF,red/K00637%09%23FFFFFF,green/K00511%09%23FFFFFF,red/K00801%09%23FFFFFF,red/K00213%09%23FFFFFF,green/K13373%09%23FFFFFF,red/K09828%09%23FFFFFF,red/K05917%09%23FFFFFF,red/
mmu05340	Primary immunodeficiency	Human Diseases	Immune diseases	9	3	12	34	0.0242248	0.072213	ENSMUSG00000026395(Ptprc),ENSMUSG00000017652(Cd40),ENSMUSG00000037321(Tap1),ENSMUSG00000024339(Tap2),ENSMUSG00000031304(Il2rg),ENSMUSG00000022504(Ciita),ENSMUSG00000005774(Rfx5),ENSMUSG00000000409(Lck),ENSMUSG00000004221(Ikbkg)	ENSMUSG00000017697(Ada),ENSMUSG00000003882(Il7r),ENSMUSG00000029591(Ung)	http://www.kegg.jp/kegg-bin/show_pathway?map05340/K06478%09%23FFFFFF,red/K05653%09%23FFFFFF,red/K08060%09%23FFFFFF,red/K05856%09%23FFFFFF,red/K05072%09%23FFFFFF,green/K08061%09%23FFFFFF,red/K05654%09%23FFFFFF,red/K03648%09%23FFFFFF,green/K01488%09%23FFFFFF,green/K05070%09%23FFFFFF,red/K03160%09%23FFFFFF,red/K07210%09%23FFFFFF,red/
mmu05224	Breast cancer	Human Diseases	Cancers: Specific types	18	21	39	147	0.02595	0.076626	ENSMUSG00000045005(Fzd5),ENSMUSG00000015312(Gadd45b),ENSMUSG00000044674(Fzd1),ENSMUSG00000000441(Raf1),ENSMUSG00000040274(Cdk6),ENSMUSG00000015957(Wnt11),ENSMUSG00000033227(Wnt6),ENSMUSG00000023067(Cdkn1a),ENSMUSG00000041417(Pik3r1),ENSMUSG00000027276(Jag1),ENSMUSG00000002413(Braf),ENSMUSG00000027878(Notch2),ENSMUSG00000022346(Myc),ENSMUSG00000025225(Nfkb2),ENSMUSG00000026923(Notch1),ENSMUSG00000…	ENSMUSG00000017146(Brca1),ENSMUSG00000041147(Brca2),ENSMUSG00000047604(Frat2),ENSMUSG00000022105(Rb1),ENSMUSG00000019768(Esr1),ENSMUSG00000052684(Jun),ENSMUSG00000002109(Ddb2),ENSMUSG00000067199(Frat1),ENSMUSG00000035109(Shc4),ENSMUSG00000070348(Ccnd1),ENSMUSG00000020312(Shc2),ENSMUSG00000020647(Ncoa1),ENSMUSG00000021668(Polk),ENSMUSG00000021250(Fos),ENSMUSG00000021453(Gadd45g),ENSMUSG00000020888…	http://www.kegg.jp/kegg-bin/show_pathway?map05224/K04379%09%23FFFFFF,green/K03068%09%23FFFFFF,green/K06051%09%23FFFFFF,red/K04503%09%23FFFFFF,green/K04362%09%23FFFFFF,green/K02353%09%23FFFFFF,green/K04377%09%23FFFFFF,red/K02432%09%23FFFFFF,red/K00445%09%23FFFFFF,red/K09389%09%23FFFFFF,green/K03069%09%23FFFFFF,green/K03096%09%23FFFFFF,green/K20994%09%23FFFFFF,red/K04361%09%23FFFFFF,red/K06618%09%2…
mmu04370	VEGF signaling pathway	Environmental Information Processing	Signal transduction	12	6	18	58	0.0264459	0.0773603	ENSMUSG00000033220(Rac2),ENSMUSG00000053436(Mapk14),ENSMUSG00000056220(Pla2g4a),ENSMUSG00000041417(Pik3r1),ENSMUSG00000022092(Ppp3cc),ENSMUSG00000052889(Prkcb),ENSMUSG00000016528(Mapkapk2),ENSMUSG00000004936(Map2k1),ENSMUSG00000000441(Raf1),ENSMUSG00000053137(Mapk11),ENSMUSG00000027646(Src),ENSMUSG00000032487(Ptgs2)	ENSMUSG00000028914(Casp9),ENSMUSG00000027544(Nfatc2),ENSMUSG00000016933(Plcg1),ENSMUSG00000062960(Kdr),ENSMUSG00000020312(Shc2),ENSMUSG00000031834(Pik3r2)	http://www.kegg.jp/kegg-bin/show_pathway?map04370/K01116%09%23FFFFFF,green/K11987%09%23FFFFFF,red/K17447%09%23FFFFFF,green/K05098%09%23FFFFFF,green/K04368%09%23FFFFFF,red/K04366%09%23FFFFFF,red/K02649%09%23FFFFFF,purple/K04399%09%23FFFFFF,green/K05704%09%23FFFFFF,red/K16342%09%23FFFFFF,red/K04443%09%23FFFFFF,red/K17332%09%23FFFFFF,green/K04348%09%23FFFFFF,red/K07860%09%23FFFFFF,red/K19662%09%23FF…
mmu04071	Sphingolipid signaling pathway	Environmental Information Processing	Signal transduction	24	7	31	114	0.0317098	0.0918997	ENSMUSG00000022052(Ppp2r2a),ENSMUSG00000040451(Sgms1),ENSMUSG00000024290(Rock1),ENSMUSG00000024927(Rela),ENSMUSG00000053436(Mapk14),ENSMUSG00000004446(Bid),ENSMUSG00000020580(Rock2),ENSMUSG00000052889(Prkcb),ENSMUSG00000021936(Mapk8),ENSMUSG00000033220(Rac2),ENSMUSG00000026626(Ppp2r5a),ENSMUSG00000050931(Sgms2),ENSMUSG00000024401(Tnf),ENSMUSG00000004936(Map2k1),ENSMUSG00000071369(Map3k5),ENSMUSG0…	ENSMUSG00000021054(Sgpp1),ENSMUSG00000000149(Gna12),ENSMUSG00000045092(S1pr1),ENSMUSG00000031834(Pik3r2),ENSMUSG00000037049(Smpd1),ENSMUSG00000019822(Smpd2),ENSMUSG00000040061(Plcb2)	http://www.kegg.jp/kegg-bin/show_pathway?map04071/K04288%09%23FFFFFF,green/K04368%09%23FFFFFF,red/K03156%09%23FFFFFF,red/K04426%09%23FFFFFF,red/K17388%09%23FFFFFF,red/K02580%09%23FFFFFF,red/K04726%09%23FFFFFF,red/K12350%09%23FFFFFF,green/K04634%09%23FFFFFF,red/K12351%09%23FFFFFF,green/K03173%09%23FFFFFF,red/K04714%09%23FFFFFF,red/K04354%09%23FFFFFF,red/K05858%09%23FFFFFF,green/K19662%09%23FFFFFF,…
mmu05231	Choline metabolism in cancer	Human Diseases	Cancers: Overview	16	11	27	98	0.0367531	0.105539	ENSMUSG00000024620(Pdgfrb),ENSMUSG00000020122(Egfr),ENSMUSG00000004936(Map2k1),ENSMUSG00000033220(Rac2),ENSMUSG00000021936(Mapk8),ENSMUSG00000028945(Rheb),ENSMUSG00000052889(Prkcb),ENSMUSG00000021759(Plpp1),ENSMUSG00000028126(Pip5k1a),ENSMUSG00000021109(Hif1a),ENSMUSG00000056220(Pla2g4a),ENSMUSG00000028412(Slc44a1),ENSMUSG00000000441(Raf1),ENSMUSG00000034731(Dgkh),ENSMUSG00000026821(Ralgds),ENSMU…	ENSMUSG00000005615(Pcyt1a),ENSMUSG00000028019(Pdgfc),ENSMUSG00000035246(Pcyt1b),ENSMUSG00000021250(Fos),ENSMUSG00000016933(Plcg1),ENSMUSG00000031834(Pik3r2),ENSMUSG00000052684(Jun),ENSMUSG00000022861(Dgkg),ENSMUSG00000025357(Dgka),ENSMUSG00000040479(Dgkz),ENSMUSG00000025856(Pdgfa)	http://www.kegg.jp/kegg-bin/show_pathway?map05231/K16342%09%23FFFFFF,red/K02649%09%23FFFFFF,purple/K04361%09%23FFFFFF,red/K07208%09%23FFFFFF,red/K04448%09%23FFFFFF,green/K07860%09%23FFFFFF,red/K04440%09%23FFFFFF,red/K04359%09%23FFFFFF,green/K04368%09%23FFFFFF,red/K01116%09%23FFFFFF,green/K00901%09%23FFFFFF,purple/K06515%09%23FFFFFF,red/K05089%09%23FFFFFF,red/K05450%09%23FFFFFF,green/K00889%09%23F…
mmu00280	Valine, leucine and isoleucine degradation	Metabolism	Amino acid metabolism	5	12	17	56	0.0373468	0.106269	ENSMUSG00000032263(Bckdhb),ENSMUSG00000063558(Aox1),ENSMUSG00000062480(Acat3),ENSMUSG00000020664(Dld),ENSMUSG00000093930(Hmgcs1)	ENSMUSG00000060376(Bckdha),ENSMUSG00000022853(Ehhadh),ENSMUSG00000041426(Hibch),ENSMUSG00000021460(Auh),ENSMUSG00000022186(Oxct1),ENSMUSG00000027332(Ivd),ENSMUSG00000027984(Hadh),ENSMUSG00000021646(Mccc2),ENSMUSG00000025465(Echs1),ENSMUSG00000028672(Hmgcl),ENSMUSG00000036880(Acaa2),ENSMUSG00000026687(Aldh9a1)	http://www.kegg.jp/kegg-bin/show_pathway?map00280/K00022%09%23FFFFFF,green/K07511%09%23FFFFFF,green/K01640%09%23FFFFFF,green/K00149%09%23FFFFFF,green/K00382%09%23FFFFFF,red/K07508%09%23FFFFFF,green/K05607%09%23FFFFFF,green/K00167%09%23FFFFFF,red/K01969%09%23FFFFFF,green/K01641%09%23FFFFFF,red/K00157%09%23FFFFFF,red/K00626%09%23FFFFFF,red/K01027%09%23FFFFFF,green/K07514%09%23FFFFFF,green/K00253%09…
mmu04912	GnRH signaling pathway	Organismal Systems	Endocrine system	14	11	25	90	0.0394826	0.111334	ENSMUSG00000056220(Pla2g4a),ENSMUSG00000001175(Calm1),ENSMUSG00000053137(Mapk11),ENSMUSG00000024639(Gnaq),ENSMUSG00000027646(Src),ENSMUSG00000053819(Camk2d),ENSMUSG00000000441(Raf1),ENSMUSG00000020122(Egfr),ENSMUSG00000053436(Mapk14),ENSMUSG00000052889(Prkcb),ENSMUSG00000021948(Prkcd),ENSMUSG00000021936(Mapk8),ENSMUSG00000000957(Mmp14),ENSMUSG00000004936(Map2k1)	ENSMUSG00000020623(Map2k6),ENSMUSG00000021820(Camk2g),ENSMUSG00000052684(Jun),ENSMUSG00000005580(Adcy9),ENSMUSG00000015968(Cacna1d),ENSMUSG00000020654(Adcy3),ENSMUSG00000040061(Plcb2),ENSMUSG00000042644(Itpr3),ENSMUSG00000021754(Map3k1),ENSMUSG00000030102(Itpr1),ENSMUSG00000014426(Map3k4)	http://www.kegg.jp/kegg-bin/show_pathway?map04912/K04851%09%23FFFFFF,green/K04441%09%23FFFFFF,red/K04416%09%23FFFFFF,green/K04448%09%23FFFFFF,green/K04958%09%23FFFFFF,green/K04368%09%23FFFFFF,red/K04361%09%23FFFFFF,red/K05704%09%23FFFFFF,red/K04433%09%23FFFFFF,green/K02183%09%23FFFFFF,red/K08043%09%23FFFFFF,green/K08049%09%23FFFFFF,green/K05858%09%23FFFFFF,green/K04634%09%23FFFFFF,red/K19662%09%2…
mmu00230	Purine metabolism	Metabolism	Nucleotide metabolism	12	23	35	134	0.0413156	0.115462	ENSMUSG00000029491(Pde6b),ENSMUSG00000023961(Enpp4),ENSMUSG00000028792(Ak2),ENSMUSG00000115338(Pnp),ENSMUSG00000054958(Nt5c1a),ENSMUSG00000023868(Pde10a),ENSMUSG00000068417(Pnp2),ENSMUSG00000029366(Dck),ENSMUSG00000005686(Ampd3),ENSMUSG00000028527(Ak4),ENSMUSG00000053965(Pde5a),ENSMUSG00000028525(Pde4b)	ENSMUSG00000021699(Pde4d),ENSMUSG00000015711(Prune1),ENSMUSG00000020649(Rrm2),ENSMUSG00000021236(Entpd5),ENSMUSG00000030671(Pde3b),ENSMUSG00000027931(Npr1),ENSMUSG00000017697(Ada),ENSMUSG00000004347(Pde1c),ENSMUSG00000048120(Entpd1),ENSMUSG00000030532(Hddc3),ENSMUSG00000014554(Dguok),ENSMUSG00000058624(Gda),ENSMUSG00000033068(Entpd6),ENSMUSG00000024177(Nme4),ENSMUSG00000037370(Enpp1),ENSMUSG00000…	http://www.kegg.jp/kegg-bin/show_pathway?map00230/K18424%09%23FFFFFF,red/K01487%09%23FFFFFF,green/K01490%09%23FFFFFF,red/K08043%09%23FFFFFF,green/K13296%09%23FFFFFF,green/K06928%09%23FFFFFF,green/K00904%09%23FFFFFF,green/K01081%09%23FFFFFF,purple/K00364%09%23FFFFFF,green/K01939%09%23FFFFFF,green/K13755%09%23FFFFFF,green/K00940%09%23FFFFFF,green/K03783%09%23FFFFFF,red/K00948%09%23FFFFFF,green/K137…
mmu04931	Insulin resistance	Human Diseases	Endocrine and metabolic diseases	16	13	29	108	0.0428551	0.118705	ENSMUSG00000025746(Il6),ENSMUSG00000014956(Ppp1cb),ENSMUSG00000053007(Creb5),ENSMUSG00000024927(Rela),ENSMUSG00000053113(Socs3),ENSMUSG00000028645(Slc2a1),ENSMUSG00000043733(Ptpn11),ENSMUSG00000024401(Tnf),ENSMUSG00000004040(Stat3),ENSMUSG00000052889(Prkcb),ENSMUSG00000041417(Pik3r1),ENSMUSG00000021025(Nfkbia),ENSMUSG00000027540(Ptpn1),ENSMUSG00000028163(Nfkb1),ENSMUSG00000021948(Prkcd),ENSMUSG00…	ENSMUSG00000028944(Prkag2),ENSMUSG00000031808(Slc27a1),ENSMUSG00000038648(Creb3l2),ENSMUSG00000033059(Pygb),ENSMUSG00000024600(Slc27a6),ENSMUSG00000031834(Pik3r2),ENSMUSG00000038894(Irs2),ENSMUSG00000032715(Trib3),ENSMUSG00000044167(Foxo1),ENSMUSG00000046794(Ppp1r3b),ENSMUSG00000040618(Pck2),ENSMUSG00000033083(Tbc1d4),ENSMUSG00000055980(Irs1)	http://www.kegg.jp/kegg-bin/show_pathway?map04931/K08749%09%23FFFFFF,green/K00688%09%23FFFFFF,green/K02580%09%23FFFFFF,red/K16172%09%23FFFFFF,green/K07187%09%23FFFFFF,green/K04696%09%23FFFFFF,red/K07201%09%23FFFFFF,green/K07200%09%23FFFFFF,green/K01596%09%23FFFFFF,green/K07299%09%23FFFFFF,red/K09048%09%23FFFFFF,green/K03156%09%23FFFFFF,red/K07189%09%23FFFFFF,green/K04735%09%23FFFFFF,red/K19662%09…
mmu02010	ABC transporters	Environmental Information Processing	Membrane transport	5	10	15	49	0.0453962	0.12464	ENSMUSG00000024339(Tap2),ENSMUSG00000037321(Tap1),ENSMUSG00000022822(Abcc5),ENSMUSG00000032849(Abcc4),ENSMUSG00000023088(Abcc1)	ENSMUSG00000032842(Abcc10),ENSMUSG00000029299(Abcg3),ENSMUSG00000024030(Abcg1),ENSMUSG00000031378(Abcd1),ENSMUSG00000020865(Abcc3),ENSMUSG00000020620(Abca8b),ENSMUSG00000021240(Abcd4),ENSMUSG00000055782(Abcd2),ENSMUSG00000018800(Abca5),ENSMUSG00000028973(Abcb8)	http://www.kegg.jp/kegg-bin/show_pathway?map02010/K05675%09%23FFFFFF,green/K05673%09%23FFFFFF,red/K05665%09%23FFFFFF,red/K05654%09%23FFFFFF,red/K05676%09%23FFFFFF,green/K05648%09%23FFFFFF,green/K05667%09%23FFFFFF,green/K05650%09%23FFFFFF,green/K05682%09%23FFFFFF,green/K05679%09%23FFFFFF,green/K05655%09%23FFFFFF,green/K05668%09%23FFFFFF,red/K05653%09%23FFFFFF,red/K05674%09%23FFFFFF,green/K05678%09…
mmu04070	Phosphatidylinositol signaling system	Environmental Information Processing	Signal transduction	8	18	26	96	0.0482487	0.130744	ENSMUSG00000028126(Pip5k1a),ENSMUSG00000001175(Calm1),ENSMUSG00000034731(Dgkh),ENSMUSG00000028894(Inpp5b),ENSMUSG00000041417(Pik3r1),ENSMUSG00000040648(Ppip5k2),ENSMUSG00000030269(Mtmr14),ENSMUSG00000052889(Prkcb)	ENSMUSG00000020937(Plcd3),ENSMUSG00000042105(Inpp5f),ENSMUSG00000022861(Dgkg),ENSMUSG00000023805(Synj2),ENSMUSG00000025357(Dgka),ENSMUSG00000040061(Plcb2),ENSMUSG00000037940(Inpp4b),ENSMUSG00000040479(Dgkz),ENSMUSG00000042644(Itpr3),ENSMUSG00000024525(Impa2),ENSMUSG00000032594(Ip6k1),ENSMUSG00000026288(Inpp5d),ENSMUSG00000030102(Itpr1),ENSMUSG00000026102(Inpp1),ENSMUSG00000031834(Pik3r2),ENSMUSG0…	http://www.kegg.jp/kegg-bin/show_pathway?map04070/K05858%09%23FFFFFF,green/K05857%09%23FFFFFF,green/K01116%09%23FFFFFF,green/K02649%09%23FFFFFF,purple/K19662%09%23FFFFFF,red/K00889%09%23FFFFFF,red/K03084%09%23FFFFFF,green/K00901%09%23FFFFFF,purple/K01107%09%23FFFFFF,green/K04960%09%23FFFFFF,green/K02183%09%23FFFFFF,red/K07756%09%23FFFFFF,green/K01092%09%23FFFFFF,green/K13024%09%23FFFFFF,purple/K2…
mmu04514	Cell adhesion molecules (CAMs)	Environmental Information Processing	Signaling molecules and interaction	36	4	40	158	0.0484547	0.130744	ENSMUSG00000055976(Cldn23),ENSMUSG00000061232(H2-K1),ENSMUSG00000035513(Ntng2),ENSMUSG00000075122(Cd80),ENSMUSG00000049939(Lrrc4),ENSMUSG00000039115(Itga9),ENSMUSG00000073421(H2-Ab1),ENSMUSG00000027962(Vcam1),ENSMUSG00000026582(Sele),ENSMUSG00000017009(Sdc4),ENSMUSG00000020592(Sdc1),ENSMUSG00000016283(H2-M2),ENSMUSG00000027009(Itga4),ENSMUSG00000022636(Alcam),ENSMUSG00000040511(Pvr),ENSMUSG000000…	ENSMUSG00000032340(Neo1),ENSMUSG00000026012(Cd28),ENSMUSG00000020598(Nrcam),ENSMUSG00000027111(Itga6)	http://www.kegg.jp/kegg-bin/show_pathway?map04514/K06494%09%23FFFFFF,red/K03160%09%23FFFFFF,red/K05413%09%23FFFFFF,red/K06257%09%23FFFFFF,red/K16338%09%23FFFFFF,red/K06483%09%23FFFFFF,red/K06751%09%23FFFFFF,red/K06089%09%23FFFFFF,red/K06793%09%23FFFFFF,red/K06745%09%23FFFFFF,red/K06591%09%23FFFFFF,red/K06585%09%23FFFFFF,red/K06478%09%23FFFFFF,red/K06752%09%23FFFFFF,red/K16359%09%23FFFFFF,red/K057…
mmu05230	Central carbon metabolism in cancer	Human Diseases	Cancers: Overview	15	3	18	62	0.0495881	0.132659	ENSMUSG00000021109(Hif1a),ENSMUSG00000026103(Gls),ENSMUSG00000041417(Pik3r1),ENSMUSG00000009376(Met),ENSMUSG00000000441(Raf1),ENSMUSG00000028645(Slc2a1),ENSMUSG00000020277(Pfkl),ENSMUSG00000025161(Slc16a3),ENSMUSG00000022346(Myc),ENSMUSG00000020122(Egfr),ENSMUSG00000024620(Pdgfrb),ENSMUSG00000040010(Slc7a5),ENSMUSG00000000628(Hk2),ENSMUSG00000021196(Pfkp),ENSMUSG00000004936(Map2k1)	ENSMUSG00000025486(Sirt3),ENSMUSG00000031565(Fgfr1),ENSMUSG00000031834(Pik3r2)	http://www.kegg.jp/kegg-bin/show_pathway?map05230/K13780%09%23FFFFFF,red/K04361%09%23FFFFFF,red/K05089%09%23FFFFFF,red/K08268%09%23FFFFFF,red/K00844%09%23FFFFFF,red/K11413%09%23FFFFFF,green/K05099%09%23FFFFFF,red/K04368%09%23FFFFFF,red/K02649%09%23FFFFFF,purple/K04362%09%23FFFFFF,green/K01425%09%23FFFFFF,red/K00850%09%23FFFFFF,red/K04366%09%23FFFFFF,red/K07299%09%23FFFFFF,red/K08180%09%23FFFFFF,r…
mmu04640	Hematopoietic cell lineage	Organismal Systems	Immune system	18	7	25	92	0.0501772	0.133097	ENSMUSG00000040329(Il7),ENSMUSG00000027398(Il1b),ENSMUSG00000051439(Cd14),ENSMUSG00000027009(Itga4),ENSMUSG00000024334(H2-Oa),ENSMUSG00000042284(Itga1),ENSMUSG00000014599(Csf1),ENSMUSG00000029084(Cd38),ENSMUSG00000026399(Cd55),ENSMUSG00000038067(Csf3),ENSMUSG00000025746(Il6),ENSMUSG00000026770(Il2ra),ENSMUSG00000005087(Cd44),ENSMUSG00000073421(H2-Ab1),ENSMUSG00000018916(Csf2),ENSMUSG00000024401(T…	ENSMUSG00000027111(Itga6),ENSMUSG00000019966(Kitl),ENSMUSG00000003882(Il7r),ENSMUSG00000006235(Epor),ENSMUSG00000020689(Itgb3),ENSMUSG00000000869(Il4),ENSMUSG00000027947(Il6ra)	http://www.kegg.jp/kegg-bin/show_pathway?map04640/K05423%09%23FFFFFF,red/K05405%09%23FFFFFF,red/K06484%09%23FFFFFF,red/K04383%09%23FFFFFF,red/K03156%09%23FFFFFF,red/K05079%09%23FFFFFF,green/K05055%09%23FFFFFF,green/K06493%09%23FFFFFF,green/K05072%09%23FFFFFF,green/K04391%09%23FFFFFF,red/K04519%09%23FFFFFF,red/K06480%09%23FFFFFF,red/K05453%09%23FFFFFF,red/K05431%09%23FFFFFF,red/K05068%09%23FFFFFF,…
mmu04122	Sulfur relay system	Genetic Information Processing	Folding, sorting and degradation	2	2	4	8	0.0533073	0.139043	ENSMUSG00000038888(Ctu1),ENSMUSG00000049482(Ctu2)	ENSMUSG00000044986(Tst),ENSMUSG00000071711(Mpst)	http://www.kegg.jp/kegg-bin/show_pathway?map04122/K14168%09%23FFFFFF,red/K14169%09%23FFFFFF,red/K01011%09%23FFFFFF,green/
mmu00740	Riboflavin metabolism	Metabolism	Metabolism of cofactors and vitamins	3	1	4	8	0.0533073	0.139043	ENSMUSG00000001348(Acp5),ENSMUSG00000002103(Acp2),ENSMUSG00000040466(Blvrb)	ENSMUSG00000037370(Enpp1)	http://www.kegg.jp/kegg-bin/show_pathway?map00740/K01513%09%23FFFFFF,green/K05901%09%23FFFFFF,red/K14379%09%23FFFFFF,red/K14410%09%23FFFFFF,red/
mmu04310	Wnt signaling pathway	Environmental Information Processing	Signal transduction	20	19	39	155	0.0551895	0.141989	ENSMUSG00000015957(Wnt11),ENSMUSG00000040260(Daam2),ENSMUSG00000053819(Camk2d),ENSMUSG00000020271(Fbxw11),ENSMUSG00000024642(Tle4),ENSMUSG00000033227(Wnt6),ENSMUSG00000000184(Ccnd2),ENSMUSG00000044674(Fzd1),ENSMUSG00000034574(Daam1),ENSMUSG00000045005(Fzd5),ENSMUSG00000024912(Fosl1),ENSMUSG00000036158(Prickle1),ENSMUSG00000052889(Prkcb),ENSMUSG00000040749(Siah1b),ENSMUSG00000033220(Rac2),ENSMUSG0…	ENSMUSG00000040061(Plcb2),ENSMUSG00000067199(Frat1),ENSMUSG00000022433(Csnk1e),ENSMUSG00000030020(Prickle2),ENSMUSG00000027544(Nfatc2),ENSMUSG00000070348(Ccnd1),ENSMUSG00000034771(Tle2),ENSMUSG00000028988(Ctnnbip1),ENSMUSG00000047604(Frat2),ENSMUSG00000028031(Dkk2),ENSMUSG00000021820(Camk2g),ENSMUSG00000052684(Jun),ENSMUSG00000008305(Tle1),ENSMUSG00000027630(Tbl1xr1),ENSMUSG00000024232(Bambi),ENS…	http://www.kegg.jp/kegg-bin/show_pathway?map04310/K05858%09%23FFFFFF,green/K17332%09%23FFFFFF,green/K10162%09%23FFFFFF,green/K02165%09%23FFFFFF,green/K04512%09%23FFFFFF,red/K03096%09%23FFFFFF,green/K04508%09%23FFFFFF,green/K10151%09%23FFFFFF,red/K04507%09%23FFFFFF,red/K03362%09%23FFFFFF,red/K19662%09%23FFFFFF,red/K04493%09%23FFFFFF,green/K04348%09%23FFFFFF,red/K02375%09%23FFFFFF,red/K00445%09%23F…
mmu04710	Circadian rhythm	Organismal Systems	Environmental adaptation	2	8	10	30	0.055344	0.141989	ENSMUSG00000020038(Cry1),ENSMUSG00000020271(Fbxw11)	ENSMUSG00000026077(Npas2),ENSMUSG00000020889(Nr1d1),ENSMUSG00000030103(Bhlhe40),ENSMUSG00000022433(Csnk1e),ENSMUSG00000032238(Rora),ENSMUSG00000028957(Per3),ENSMUSG00000028944(Prkag2),ENSMUSG00000030256(Bhlhe41)	http://www.kegg.jp/kegg-bin/show_pathway?map04710/K03728%09%23FFFFFF,green/K09026%09%23FFFFFF,green/K07200%09%23FFFFFF,green/K03362%09%23FFFFFF,red/K08532%09%23FFFFFF,green/K03730%09%23FFFFFF,green/K21945%09%23FFFFFF,green/K02295%09%23FFFFFF,red/K08960%09%23FFFFFF,green/K03729%09%23FFFFFF,green/
mmu04530	Tight junction	Cellular Processes	Cellular community - eukaryotes	27	12	39	156	0.060085	0.152899	ENSMUSG00000022831(Hcls1),ENSMUSG00000021936(Mapk8),ENSMUSG00000030403(Vasp),ENSMUSG00000020900(Myh10),ENSMUSG00000013076(Amotl1),ENSMUSG00000038235(F11r),ENSMUSG00000029580(Actb),ENSMUSG00000022052(Ppp2r2a),ENSMUSG00000052397(Ezr),ENSMUSG00000053062(Jam2),ENSMUSG00000024290(Rock1),ENSMUSG00000031207(Msn),ENSMUSG00000025809(Itgb1),ENSMUSG00000045795(Whamm),ENSMUSG00000020580(Rock2),ENSMUSG0000002…	ENSMUSG00000032232(Cgnl1),ENSMUSG00000041688(Amot),ENSMUSG00000005699(Pard6a),ENSMUSG00000000881(Dlg3),ENSMUSG00000028944(Prkag2),ENSMUSG00000061859(Patj),ENSMUSG00000021754(Map3k1),ENSMUSG00000015968(Cacna1d),ENSMUSG00000070348(Ccnd1),ENSMUSG00000052684(Jun),ENSMUSG00000034917(Tjp3),ENSMUSG00000056214(Pard6g)	http://www.kegg.jp/kegg-bin/show_pathway?map04530/K10352%09%23FFFFFF,red/K06097%09%23FFFFFF,green/K06274%09%23FFFFFF,red/K17388%09%23FFFFFF,red/K06104%09%23FFFFFF,red/K21110%09%23FFFFFF,green/K04440%09%23FFFFFF,red/K06089%09%23FFFFFF,red/K04354%09%23FFFFFF,red/K05692%09%23FFFFFF,red/K20479%09%23FFFFFF,red/K08018%09%23FFFFFF,red/K04514%09%23FFFFFF,red/K16819%09%23FFFFFF,green/K06092%09%23FFFFFF,gr…
mmu05410	Hypertrophic cardiomyopathy (HCM)	Human Diseases	Cardiovascular diseases	15	7	22	81	0.0635139	0.160321	ENSMUSG00000000555(Itga5),ENSMUSG00000025746(Il6),ENSMUSG00000025321(Itgb8),ENSMUSG00000003352(Cacnb3),ENSMUSG00000062825(Actg1),ENSMUSG00000053395(Cacng8),ENSMUSG00000039115(Itga9),ENSMUSG00000025809(Itgb1),ENSMUSG00000027009(Itga4),ENSMUSG00000021367(Edn1),ENSMUSG00000042284(Itga1),ENSMUSG00000031799(Tpm4),ENSMUSG00000029580(Actb),ENSMUSG00000024401(Tnf),ENSMUSG00000002100(Mybpc3)	ENSMUSG00000022817(Itgb5),ENSMUSG00000028944(Prkag2),ENSMUSG00000039952(Dag1),ENSMUSG00000020689(Itgb3),ENSMUSG00000027111(Itga6),ENSMUSG00000015968(Cacna1d),ENSMUSG00000021253(Tgfb3)	http://www.kegg.jp/kegg-bin/show_pathway?map05410/K05692%09%23FFFFFF,red/K10375%09%23FFFFFF,red/K04851%09%23FFFFFF,green/K12568%09%23FFFFFF,red/K06588%09%23FFFFFF,green/K05405%09%23FFFFFF,red/K07200%09%23FFFFFF,green/K04873%09%23FFFFFF,red/K06493%09%23FFFFFF,green/K04864%09%23FFFFFF,red/K06484%09%23FFFFFF,red/K05719%09%23FFFFFF,red/K03156%09%23FFFFFF,red/K06485%09%23FFFFFF,green/K06480%09%23FFFFF…
mmu01524	Platinum drug resistance	Human Diseases	Drug resistance: Antineoplastic	10	11	21	77	0.0661165	0.165556	ENSMUSG00000071369(Map3k5),ENSMUSG00000024778(Fas),ENSMUSG00000001663(Gstt1),ENSMUSG00000066150(Slc31a1),ENSMUSG00000023067(Cdkn1a),ENSMUSG00000041417(Pik3r1),ENSMUSG00000063694(Cycs),ENSMUSG00000004446(Bid),ENSMUSG00000032000(Birc3),ENSMUSG00000057367(Birc2)	ENSMUSG00000002083(Bbc3),ENSMUSG00000017146(Brca1),ENSMUSG00000031628(Casp3),ENSMUSG00000005370(Msh6),ENSMUSG00000032498(Mlh1),ENSMUSG00000019841(Rev3l),ENSMUSG00000028914(Casp9),ENSMUSG00000033318(Gstt2),ENSMUSG00000031834(Pik3r2),ENSMUSG00000024151(Msh2),ENSMUSG00000001665(Gstt3)	http://www.kegg.jp/kegg-bin/show_pathway?map01524/K04390%09%23FFFFFF,red/K02649%09%23FFFFFF,purple/K06625%09%23FFFFFF,red/K08735%09%23FFFFFF,green/K08737%09%23FFFFFF,green/K02187%09%23FFFFFF,green/K02350%09%23FFFFFF,green/K10605%09%23FFFFFF,green/K14686%09%23FFFFFF,red/K08734%09%23FFFFFF,green/K04426%09%23FFFFFF,red/K16060%09%23FFFFFF,red/K04726%09%23FFFFFF,red/K10132%09%23FFFFFF,green/K00799%09%…
mmu05146	Amoebiasis	Human Diseases	Infectious diseases: Parasitic	18	8	26	99	0.0669496	0.166311	ENSMUSG00000051439(Cd14),ENSMUSG00000004296(Il12b),ENSMUSG00000027776(Il12a),ENSMUSG00000031502(Col4a1),ENSMUSG00000024639(Gnaq),ENSMUSG00000025746(Il6),ENSMUSG00000028163(Nfkb1),ENSMUSG00000027995(Tlr2),ENSMUSG00000027398(Il1b),ENSMUSG00000041417(Pik3r1),ENSMUSG00000020826(Nos2),ENSMUSG00000018916(Csf2),ENSMUSG00000021823(Vcl),ENSMUSG00000024927(Rela),ENSMUSG00000016529(Il10),ENSMUSG00000052889(…	ENSMUSG00000052688(Rab7b),ENSMUSG00000031628(Casp3),ENSMUSG00000040061(Plcb2),ENSMUSG00000024421(Lama3),ENSMUSG00000031834(Pik3r2),ENSMUSG00000042842(Serpinb6b),ENSMUSG00000021253(Tgfb3),ENSMUSG00000039005(Tlr4)	http://www.kegg.jp/kegg-bin/show_pathway?map05146/K04634%09%23FFFFFF,red/K04391%09%23FFFFFF,red/K02580%09%23FFFFFF,red/K05406%09%23FFFFFF,red/K05858%09%23FFFFFF,green/K05443%09%23FFFFFF,red/K06240%09%23FFFFFF,green/K13241%09%23FFFFFF,red/K05405%09%23FFFFFF,red/K05700%09%23FFFFFF,red/K19662%09%23FFFFFF,red/K04735%09%23FFFFFF,red/K03156%09%23FFFFFF,red/K05425%09%23FFFFFF,red/K10160%09%23FFFFFF,gree…
mmu03008	Ribosome biogenesis in eukaryotes	Genetic Information Processing	Translation	21	0	21	78	0.0743466	0.183232	ENSMUSG00000003848(Nob1),ENSMUSG00000024613(Tcof1),ENSMUSG00000028010(Gar1),ENSMUSG00000029715(Pop7),ENSMUSG00000027613(Eif6),ENSMUSG00000026020(Nop58),ENSMUSG00000021149(Gtpbp4),ENSMUSG00000001056(Nhp2),ENSMUSG00000063480(Snu13),ENSMUSG00000041057(Wdr43),ENSMUSG00000058006(Mdn1),ENSMUSG00000029430(Ran),ENSMUSG00000027405(Nop56),ENSMUSG00000022325(Pop1),ENSMUSG00000024785(Rcl1),ENSMUSG00000018040…	-	http://www.kegg.jp/kegg-bin/show_pathway?map03008/K14572%09%23FFFFFF,red/K11129%09%23FFFFFF,red/K11883%09%23FFFFFF,red/K06943%09%23FFFFFF,red/K14527%09%23FFFFFF,red/K03264%09%23FFFFFF,red/K14546%09%23FFFFFF,red/K03538%09%23FFFFFF,red/K12845%09%23FFFFFF,red/K14562%09%23FFFFFF,red/K14559%09%23FFFFFF,red/K12618%09%23FFFFFF,red/K07936%09%23FFFFFF,red/K14558%09%23FFFFFF,red/K14574%09%23FFFFFF,red/K111…
mmu00920	Sulfur metabolism	Metabolism	Energy metabolism	0	4	4	9	0.081358	0.197277	-	ENSMUSG00000044986(Tst),ENSMUSG00000071711(Mpst),ENSMUSG00000049858(Suox),ENSMUSG00000064254(Ethe1)	http://www.kegg.jp/kegg-bin/show_pathway?map00920/K01011%09%23FFFFFF,green/K17725%09%23FFFFFF,green/K00387%09%23FFFFFF,green/
mmu04145	Phagosome	Cellular Processes	Transport and catabolism	33	8	41	169	0.0817177	0.197277	ENSMUSG00000026390(Marco),ENSMUSG00000051439(Cd14),ENSMUSG00000001473(Tubb6),ENSMUSG00000025044(Msr1),ENSMUSG00000061232(H2-K1),ENSMUSG00000019210(Atp6v1e1),ENSMUSG00000062825(Actg1),ENSMUSG00000073421(H2-Ab1),ENSMUSG00000000555(Itga5),ENSMUSG00000030162(Olr1),ENSMUSG00000015340(Cybb),ENSMUSG00000027995(Tlr2),ENSMUSG00000062591(Tubb4a),ENSMUSG00000016283(H2-M2),ENSMUSG00000026656(Fcgr2b),ENSMUSG0…	ENSMUSG00000052688(Rab7b),ENSMUSG00000059498(Fcgr3),ENSMUSG00000022817(Itgb5),ENSMUSG00000036103(Colec12),ENSMUSG00000020689(Itgb3),ENSMUSG00000019302(Atp6v0a1),ENSMUSG00000028238(Atp6v0d2),ENSMUSG00000039005(Tlr4)	http://www.kegg.jp/kegg-bin/show_pathway?map04145/K05654%09%23FFFFFF,red/K13813%09%23FFFFFF,red/K10062%09%23FFFFFF,green/K06484%09%23FFFFFF,red/K10089%09%23FFFFFF,red/K12560%09%23FFFFFF,red/K07375%09%23FFFFFF,red/K10169%09%23FFFFFF,red/K03990%09%23FFFFFF,red/K07898%09%23FFFFFF,green/K06493%09%23FFFFFF,green/K10159%09%23FFFFFF,red/K05719%09%23FFFFFF,red/K08763%09%23FFFFFF,red/K02150%09%23FFFFFF,re…
mmu04215	Apoptosis - multiple species	Cellular Processes	Cell growth and death	6	4	10	32	0.0819363	0.197277	ENSMUSG00000032000(Birc3),ENSMUSG00000025076(Casp7),ENSMUSG00000057367(Birc2),ENSMUSG00000021936(Mapk8),ENSMUSG00000004446(Bid),ENSMUSG00000063694(Cycs)	ENSMUSG00000028914(Casp9),ENSMUSG00000068329(Htra2),ENSMUSG00000031628(Casp3),ENSMUSG00000002083(Bbc3)	http://www.kegg.jp/kegg-bin/show_pathway?map04215/K02187%09%23FFFFFF,green/K04726%09%23FFFFFF,red/K04440%09%23FFFFFF,red/K10132%09%23FFFFFF,green/K08669%09%23FFFFFF,green/K08738%09%23FFFFFF,red/K04397%09%23FFFFFF,red/K16060%09%23FFFFFF,red/K04399%09%23FFFFFF,green/
mmu04664	Fc epsilon RI signaling pathway	Organismal Systems	Immune system	13	5	18	66	0.0842996	0.201418	ENSMUSG00000021936(Mapk8),ENSMUSG00000033220(Rac2),ENSMUSG00000002699(Lcp2),ENSMUSG00000004936(Map2k1),ENSMUSG00000024401(Tnf),ENSMUSG00000053436(Mapk14),ENSMUSG00000042228(Lyn),ENSMUSG00000041417(Pik3r1),ENSMUSG00000000441(Raf1),ENSMUSG00000018916(Csf2),ENSMUSG00000021457(Syk),ENSMUSG00000056220(Pla2g4a),ENSMUSG00000053137(Mapk11)	ENSMUSG00000016933(Plcg1),ENSMUSG00000031834(Pik3r2),ENSMUSG00000026288(Inpp5d),ENSMUSG00000000869(Il4),ENSMUSG00000020623(Map2k6)	http://www.kegg.jp/kegg-bin/show_pathway?map04664/K04433%09%23FFFFFF,green/K04441%09%23FFFFFF,red/K01116%09%23FFFFFF,green/K04440%09%23FFFFFF,red/K02649%09%23FFFFFF,purple/K04366%09%23FFFFFF,red/K05855%09%23FFFFFF,red/K05854%09%23FFFFFF,red/K07361%09%23FFFFFF,red/K07860%09%23FFFFFF,red/K16342%09%23FFFFFF,red/K03156%09%23FFFFFF,red/K03084%09%23FFFFFF,green/K04368%09%23FFFFFF,red/K05430%09%23FFFFFF…
mmu05226	Gastric cancer	Human Diseases	Cancers: Specific types	14	22	36	147	0.0876539	0.207846	ENSMUSG00000009376(Met),ENSMUSG00000041417(Pik3r1),ENSMUSG00000033227(Wnt6),ENSMUSG00000023067(Cdkn1a),ENSMUSG00000073802(Cdkn2b),ENSMUSG00000015957(Wnt11),ENSMUSG00000000441(Raf1),ENSMUSG00000045005(Fzd5),ENSMUSG00000015312(Gadd45b),ENSMUSG00000044674(Fzd1),ENSMUSG00000004936(Map2k1),ENSMUSG00000020122(Egfr),ENSMUSG00000002413(Braf),ENSMUSG00000022346(Myc)	ENSMUSG00000028864(Hgf),ENSMUSG00000035109(Shc4),ENSMUSG00000070348(Ccnd1),ENSMUSG00000067199(Frat1),ENSMUSG00000032498(Mlh1),ENSMUSG00000002109(Ddb2),ENSMUSG00000025358(Cdk2),ENSMUSG00000022105(Rb1),ENSMUSG00000032440(Tgfbr2),ENSMUSG00000047604(Frat2),ENSMUSG00000018983(E2f2),ENSMUSG00000024913(Lrp5),ENSMUSG00000031834(Pik3r2),ENSMUSG00000021253(Tgfb3),ENSMUSG00000015846(Rxra),ENSMUSG00000020888…	http://www.kegg.jp/kegg-bin/show_pathway?map05226/K02432%09%23FFFFFF,red/K02206%09%23FFFFFF,green/K04361%09%23FFFFFF,red/K06626%09%23FFFFFF,green/K06618%09%23FFFFFF,green/K10140%09%23FFFFFF,green/K08524%09%23FFFFFF,green/K09389%09%23FFFFFF,green/K08734%09%23FFFFFF,green/K04377%09%23FFFFFF,red/K10056%09%23FFFFFF,green/K02353%09%23FFFFFF,green/K05099%09%23FFFFFF,red/K03068%09%23FFFFFF,green/K04402%…
mmu05213	Endometrial cancer	Human Diseases	Cancers: Specific types	8	8	16	58	0.091566	0.21549	ENSMUSG00000015312(Gadd45b),ENSMUSG00000000441(Raf1),ENSMUSG00000041417(Pik3r1),ENSMUSG00000023067(Cdkn1a),ENSMUSG00000020122(Egfr),ENSMUSG00000022346(Myc),ENSMUSG00000002413(Braf),ENSMUSG00000004936(Map2k1)	ENSMUSG00000002109(Ddb2),ENSMUSG00000032498(Mlh1),ENSMUSG00000028914(Casp9),ENSMUSG00000070348(Ccnd1),ENSMUSG00000021453(Gadd45g),ENSMUSG00000021668(Polk),ENSMUSG00000031834(Pik3r2),ENSMUSG00000048756(Foxo3)	http://www.kegg.jp/kegg-bin/show_pathway?map05213/K04503%09%23FFFFFF,green/K09408%09%23FFFFFF,green/K04399%09%23FFFFFF,green/K04368%09%23FFFFFF,red/K06625%09%23FFFFFF,red/K08734%09%23FFFFFF,green/K04402%09%23FFFFFF,purple/K03511%09%23FFFFFF,green/K04361%09%23FFFFFF,red/K10140%09%23FFFFFF,green/K04366%09%23FFFFFF,red/K04365%09%23FFFFFF,red/K04377%09%23FFFFFF,red/K02649%09%23FFFFFF,purple/
mmu05219	Bladder cancer	Human Diseases	Cancers: Specific types	9	3	12	41	0.0924266	0.215892	ENSMUSG00000041620(Mmp1b),ENSMUSG00000020122(Egfr),ENSMUSG00000002413(Braf),ENSMUSG00000022346(Myc),ENSMUSG00000004936(Map2k1),ENSMUSG00000027646(Src),ENSMUSG00000017737(Mmp9),ENSMUSG00000000441(Raf1),ENSMUSG00000023067(Cdkn1a)	ENSMUSG00000018983(E2f2),ENSMUSG00000022105(Rb1),ENSMUSG00000070348(Ccnd1)	http://www.kegg.jp/kegg-bin/show_pathway?map05219/K06618%09%23FFFFFF,green/K04368%09%23FFFFFF,red/K04366%09%23FFFFFF,red/K06625%09%23FFFFFF,red/K04503%09%23FFFFFF,green/K04377%09%23FFFFFF,red/K04365%09%23FFFFFF,red/K01388%09%23FFFFFF,red/K05704%09%23FFFFFF,red/K01403%09%23FFFFFF,red/K04361%09%23FFFFFF,red/K09389%09%23FFFFFF,green/
mmu00440	Phosphonate and phosphinate metabolism	Metabolism	Metabolism of other amino acids	1	2	3	6	0.0948951	0.219135	ENSMUSG00000040774(Cept1)	ENSMUSG00000005615(Pcyt1a),ENSMUSG00000035246(Pcyt1b)	http://www.kegg.jp/kegg-bin/show_pathway?map00440/K13644%09%23FFFFFF,red/K00968%09%23FFFFFF,green/
mmu05216	Thyroid cancer	Human Diseases	Cancers: Specific types	5	6	11	37	0.0952152	0.219135	ENSMUSG00000004936(Map2k1),ENSMUSG00000023067(Cdkn1a),ENSMUSG00000002413(Braf),ENSMUSG00000022346(Myc),ENSMUSG00000015312(Gadd45b)	ENSMUSG00000070348(Ccnd1),ENSMUSG00000000440(Pparg),ENSMUSG00000021668(Polk),ENSMUSG00000002109(Ddb2),ENSMUSG00000015846(Rxra),ENSMUSG00000021453(Gadd45g)	http://www.kegg.jp/kegg-bin/show_pathway?map05216/K04365%09%23FFFFFF,red/K10140%09%23FFFFFF,green/K03511%09%23FFFFFF,green/K04503%09%23FFFFFF,green/K08530%09%23FFFFFF,green/K06625%09%23FFFFFF,red/K08524%09%23FFFFFF,green/K04402%09%23FFFFFF,purple/K04368%09%23FFFFFF,red/K04377%09%23FFFFFF,red/
mmu04150	mTOR signaling pathway	Environmental Information Processing	Signal transduction	19	18	37	153	0.0976811	0.223169	ENSMUSG00000004936(Map2k1),ENSMUSG00000024401(Tnf),ENSMUSG00000050310(Rictor),ENSMUSG00000024170(Telo2),ENSMUSG00000028945(Rheb),ENSMUSG00000052889(Prkcb),ENSMUSG00000040010(Slc7a5),ENSMUSG00000028156(Eif4e),ENSMUSG00000020108(Ddit4),ENSMUSG00000002413(Braf),ENSMUSG00000015957(Wnt11),ENSMUSG00000031959(Wdr59),ENSMUSG00000000441(Raf1),ENSMUSG00000041417(Pik3r1),ENSMUSG00000033227(Wnt6),ENSMUSG0000…	ENSMUSG00000061175(Fnip2),ENSMUSG00000031834(Pik3r2),ENSMUSG00000028278(Rragd),ENSMUSG00000024913(Lrp5),ENSMUSG00000032633(Flcn),ENSMUSG00000047789(Slc38a9),ENSMUSG00000015944(Castor2),ENSMUSG00000050552(Lamtor4),ENSMUSG00000041658(Rragb),ENSMUSG00000028893(Sesn2),ENSMUSG00000020888(Dvl2),ENSMUSG00000004798(Ulk2),ENSMUSG00000021368(Tbc1d7),ENSMUSG00000054115(Skp2),ENSMUSG00000055980(Irs1),ENSMUSG…	http://www.kegg.jp/kegg-bin/show_pathway?map04150/K23081%09%23FFFFFF,green/K21357%09%23FFFFFF,green/K20396%09%23FFFFFF,green/K02150%09%23FFFFFF,red/K20394%09%23FFFFFF,green/K08269%09%23FFFFFF,green/K04365%09%23FFFFFF,red/K20399%09%23FFFFFF,green/K23080%09%23FFFFFF,green/K07208%09%23FFFFFF,red/K08267%09%23FFFFFF,red/K20401%09%23FFFFFF,green/K20409%09%23FFFFFF,red/K01384%09%23FFFFFF,red/K02375%09%2…
mmu00770	Pantothenate and CoA biosynthesis	Metabolism	Metabolism of cofactors and vitamins	1	5	6	17	0.0990841	0.224734	ENSMUSG00000020010(Vnn3)	ENSMUSG00000037370(Enpp1),ENSMUSG00000028636(Ppcs),ENSMUSG00000033610(Pank1),ENSMUSG00000001755(Coasy),ENSMUSG00000063849(Ppcdc)	http://www.kegg.jp/kegg-bin/show_pathway?map00770/K02318%09%23FFFFFF,green/K01922%09%23FFFFFF,green/K01598%09%23FFFFFF,green/K09680%09%23FFFFFF,green/K01513%09%23FFFFFF,green/K08069%09%23FFFFFF,red/
mmu05100	Bacterial invasion of epithelial cells	Human Diseases	Infectious diseases: Bacterial	13	6	19	72	0.101673	0.228948	ENSMUSG00000017776(Crk),ENSMUSG00000000555(Itga5),ENSMUSG00000062825(Actg1),ENSMUSG00000041417(Pik3r1),ENSMUSG00000009376(Met),ENSMUSG00000021823(Vcl),ENSMUSG00000027646(Src),ENSMUSG00000073982(Rhog),ENSMUSG00000025809(Itgb1),ENSMUSG00000022831(Hcls1),ENSMUSG00000007655(Cav1),ENSMUSG00000058013(Septin11),ENSMUSG00000029580(Actb)	ENSMUSG00000018398(Septin8),ENSMUSG00000035109(Shc4),ENSMUSG00000031714(Gab1),ENSMUSG00000020312(Shc2),ENSMUSG00000017670(Elmo2),ENSMUSG00000031834(Pik3r2)	http://www.kegg.jp/kegg-bin/show_pathway?map05100/K17447%09%23FFFFFF,green/K17449%09%23FFFFFF,green/K09593%09%23FFFFFF,green/K05719%09%23FFFFFF,red/K05099%09%23FFFFFF,red/K16939%09%23FFFFFF,purple/K04438%09%23FFFFFF,red/K05692%09%23FFFFFF,red/K07863%09%23FFFFFF,red/K02649%09%23FFFFFF,purple/K05700%09%23FFFFFF,red/K18985%09%23FFFFFF,green/K05704%09%23FFFFFF,red/K06106%09%23FFFFFF,red/K06484%09%23F…
mmu04928	Parathyroid hormone synthesis, secretion and action	Organismal Systems	Endocrine system	12	15	27	108	0.103347	0.230176	ENSMUSG00000028525(Pde4b),ENSMUSG00000050578(Mmp13),ENSMUSG00000024639(Gnaq),ENSMUSG00000053007(Creb5),ENSMUSG00000020122(Egfr),ENSMUSG00000002413(Braf),ENSMUSG00000023903(Mmp25),ENSMUSG00000000957(Mmp14),ENSMUSG00000004936(Map2k1),ENSMUSG00000000441(Raf1),ENSMUSG00000052889(Prkcb),ENSMUSG00000023067(Cdkn1a)	ENSMUSG00000074622(Mafb),ENSMUSG00000005580(Adcy9),ENSMUSG00000030102(Itpr1),ENSMUSG00000000149(Gna12),ENSMUSG00000039153(Runx2),ENSMUSG00000021250(Fos),ENSMUSG00000015846(Rxra),ENSMUSG00000038648(Creb3l2),ENSMUSG00000040061(Plcb2),ENSMUSG00000031565(Fgfr1),ENSMUSG00000020654(Adcy3),ENSMUSG00000042644(Itpr3),ENSMUSG00000005583(Mef2c),ENSMUSG00000024913(Lrp5),ENSMUSG00000021699(Pde4d)	http://www.kegg.jp/kegg-bin/show_pathway?map04928/K04365%09%23FFFFFF,red/K04634%09%23FFFFFF,red/K04454%09%23FFFFFF,green/K04362%09%23FFFFFF,green/K04346%09%23FFFFFF,green/K04361%09%23FFFFFF,red/K04366%09%23FFFFFF,red/K08003%09%23FFFFFF,red/K08049%09%23FFFFFF,green/K05858%09%23FFFFFF,green/K13293%09%23FFFFFF,purple/K04958%09%23FFFFFF,green/K04960%09%23FFFFFF,green/K07763%09%23FFFFFF,red/K06625%09%…
mmu04211	Longevity regulating pathway	Organismal Systems	Aging	9	14	23	90	0.103689	0.230176	ENSMUSG00000028163(Nfkb1),ENSMUSG00000041417(Pik3r1),ENSMUSG00000029471(Camkk2),ENSMUSG00000053007(Creb5),ENSMUSG00000040760(Appl1),ENSMUSG00000028945(Rheb),ENSMUSG00000006818(Sod2),ENSMUSG00000024927(Rela),ENSMUSG00000028156(Eif4e)	ENSMUSG00000055980(Irs1),ENSMUSG00000020654(Adcy3),ENSMUSG00000038894(Irs2),ENSMUSG00000038648(Creb3l2),ENSMUSG00000005580(Adcy9),ENSMUSG00000029512(Ulk1),ENSMUSG00000038332(Sesn1),ENSMUSG00000044167(Foxo1),ENSMUSG00000000440(Pparg),ENSMUSG00000048756(Foxo3),ENSMUSG00000027244(Atg13),ENSMUSG00000031834(Pik3r2),ENSMUSG00000028893(Sesn2),ENSMUSG00000028944(Prkag2)	http://www.kegg.jp/kegg-bin/show_pathway?map04211/K03259%09%23FFFFFF,red/K09047%09%23FFFFFF,red/K04564%09%23FFFFFF,red/K04735%09%23FFFFFF,red/K08530%09%23FFFFFF,green/K02580%09%23FFFFFF,red/K07200%09%23FFFFFF,green/K07359%09%23FFFFFF,red/K08733%09%23FFFFFF,red/K07208%09%23FFFFFF,red/K02649%09%23FFFFFF,purple/K09408%09%23FFFFFF,green/K20394%09%23FFFFFF,green/K08043%09%23FFFFFF,green/K08331%09%23FF…
mmu04512	ECM-receptor interaction	Environmental Information Processing	Signaling molecules and interaction	15	6	21	82	0.114007	0.251297	ENSMUSG00000041936(Agrn),ENSMUSG00000031503(Col4a2),ENSMUSG00000025321(Itgb8),ENSMUSG00000025809(Itgb1),ENSMUSG00000005087(Cd44),ENSMUSG00000027009(Itga4),ENSMUSG00000020592(Sdc1),ENSMUSG00000042284(Itga1),ENSMUSG00000017009(Sdc4),ENSMUSG00000029304(Spp1),ENSMUSG00000031502(Col4a1),ENSMUSG00000028364(Tnc),ENSMUSG00000055447(Cd47),ENSMUSG00000000555(Itga5),ENSMUSG00000039115(Itga9)	ENSMUSG00000024421(Lama3),ENSMUSG00000027111(Itga6),ENSMUSG00000039952(Dag1),ENSMUSG00000020689(Itgb3),ENSMUSG00000038486(Sv2a),ENSMUSG00000022817(Itgb5)	http://www.kegg.jp/kegg-bin/show_pathway?map04512/K06250%09%23FFFFFF,red/K06484%09%23FFFFFF,red/K06483%09%23FFFFFF,red/K06266%09%23FFFFFF,red/K06256%09%23FFFFFF,red/K06237%09%23FFFFFF,red/K06254%09%23FFFFFF,red/K06257%09%23FFFFFF,red/K06480%09%23FFFFFF,red/K05719%09%23FFFFFF,red/K06485%09%23FFFFFF,green/K06252%09%23FFFFFF,red/K06258%09%23FFFFFF,green/K16338%09%23FFFFFF,red/K06493%09%23FFFFFF,gree…
mmu01040	Biosynthesis of unsaturated fatty acids	Metabolism	Lipid metabolism	3	7	10	34	0.11516	0.252064	ENSMUSG00000027195(Hsd17b12),ENSMUSG00000035376(Hacd2),ENSMUSG00000028937(Acot7)	ENSMUSG00000029098(Acox3),ENSMUSG00000025203(Scd2),ENSMUSG00000028497(Hacd4),ENSMUSG00000032349(Elovl5),ENSMUSG00000021226(Acot2),ENSMUSG00000010663(Fads1),ENSMUSG00000072949(Acot1)	http://www.kegg.jp/kegg-bin/show_pathway?map01040/K00507%09%23FFFFFF,green/K01068%09%23FFFFFF,green/K10251%09%23FFFFFF,red/K10224%09%23FFFFFF,green/K10244%09%23FFFFFF,green/K00232%09%23FFFFFF,green/K10703%09%23FFFFFF,purple/K17360%09%23FFFFFF,red/
mmu04910	Insulin signaling pathway	Organismal Systems	Endocrine system	19	14	33	137	0.117193	0.254733	ENSMUSG00000027540(Ptpn1),ENSMUSG00000024143(Rhoq),ENSMUSG00000021936(Mapk8),ENSMUSG00000028945(Rheb),ENSMUSG00000000628(Hk2),ENSMUSG00000004936(Map2k1),ENSMUSG00000005057(Sh2b2),ENSMUSG00000002413(Braf),ENSMUSG00000019487(Trip10),ENSMUSG00000028156(Eif4e),ENSMUSG00000039844(Rapgef1),ENSMUSG00000041417(Pik3r1),ENSMUSG00000000441(Raf1),ENSMUSG00000017776(Crk),ENSMUSG00000001175(Calm1),ENSMUSG00000…	ENSMUSG00000044167(Foxo1),ENSMUSG00000030671(Pde3b),ENSMUSG00000031834(Pik3r2),ENSMUSG00000020027(Socs2),ENSMUSG00000020312(Shc2),ENSMUSG00000020190(Mknk2),ENSMUSG00000028944(Prkag2),ENSMUSG00000055980(Irs1),ENSMUSG00000035109(Shc4),ENSMUSG00000046794(Ppp1r3b),ENSMUSG00000040618(Pck2),ENSMUSG00000031295(Phka2),ENSMUSG00000038894(Irs2),ENSMUSG00000033059(Pygb)	http://www.kegg.jp/kegg-bin/show_pathway?map04910/K16172%09%23FFFFFF,green/K07190%09%23FFFFFF,green/K04366%09%23FFFFFF,red/K03259%09%23FFFFFF,red/K04365%09%23FFFFFF,red/K02183%09%23FFFFFF,red/K01596%09%23FFFFFF,green/K07201%09%23FFFFFF,green/K04694%09%23FFFFFF,red/K04696%09%23FFFFFF,red/K05696%09%23FFFFFF,red/K04695%09%23FFFFFF,green/K00844%09%23FFFFFF,red/K04372%09%23FFFFFF,green/K07194%09%23FFF…
mmu00564	Glycerophospholipid metabolism	Metabolism	Lipid metabolism	11	13	24	96	0.11916	0.257221	ENSMUSG00000035237(Lcat),ENSMUSG00000040774(Cept1),ENSMUSG00000021759(Plpp1),ENSMUSG00000017715(Pgs1),ENSMUSG00000033192(Lpcat2),ENSMUSG00000056220(Pla2g4a),ENSMUSG00000030275(Etnk1),ENSMUSG00000026827(Gpd2),ENSMUSG00000060675(Plaat3),ENSMUSG00000034731(Dgkh),ENSMUSG00000023827(Agpat4)	ENSMUSG00000052160(Pld4),ENSMUSG00000005615(Pcyt1a),ENSMUSG00000035246(Pcyt1b),ENSMUSG00000020593(Lpin1),ENSMUSG00000036833(Pnpla7),ENSMUSG00000028751(Pla2g2e),ENSMUSG00000004565(Pnpla6),ENSMUSG00000023019(Gpd1),ENSMUSG00000025357(Dgka),ENSMUSG00000050627(Gpd1l),ENSMUSG00000022861(Dgkg),ENSMUSG00000040479(Dgkz),ENSMUSG00000031903(Pla2g15)	http://www.kegg.jp/kegg-bin/show_pathway?map00564/K01080%09%23FFFFFF,red/K13644%09%23FFFFFF,red/K06129%09%23FFFFFF,green/K00111%09%23FFFFFF,red/K00901%09%23FFFFFF,purple/K13523%09%23FFFFFF,red/K16860%09%23FFFFFF,green/K14676%09%23FFFFFF,green/K00995%09%23FFFFFF,red/K16342%09%23FFFFFF,red/K15728%09%23FFFFFF,green/K00650%09%23FFFFFF,red/K01047%09%23FFFFFF,green/K00894%09%23FFFFFF,red/K16817%09%23FF…
mmu00533	Glycosaminoglycan biosynthesis - keratan sulfate	Metabolism	Glycan biosynthesis and metabolism	3	2	5	14	0.122869	0.26274	ENSMUSG00000051650(B3gnt2),ENSMUSG00000013846(St3gal1),ENSMUSG00000028538(St3gal3)	ENSMUSG00000028413(B4galt1),ENSMUSG00000022793(B4galt4)	http://www.kegg.jp/kegg-bin/show_pathway?map00533/K00741%09%23FFFFFF,red/K07966%09%23FFFFFF,green/K07969%09%23FFFFFF,green/K00781%09%23FFFFFF,red/K00780%09%23FFFFFF,red/
mmu03420	Nucleotide excision repair	Genetic Information Processing	Replication and repair	0	12	12	43	0.123442	0.26274	-	ENSMUSG00000021639(Gtf2h2),ENSMUSG00000024854(Pold4),ENSMUSG00000038644(Pold1),ENSMUSG00000002109(Ddb2),ENSMUSG00000030094(Xpc),ENSMUSG00000056394(Lig1),ENSMUSG00000022881(Rfc4),ENSMUSG00000007080(Pole),ENSMUSG00000000751(Rpa1),ENSMUSG00000026048(Ercc5),ENSMUSG00000023104(Rfc2),ENSMUSG00000012483(Rpa3)	http://www.kegg.jp/kegg-bin/show_pathway?map03420/K07466%09%23FFFFFF,green/K10838%09%23FFFFFF,green/K02327%09%23FFFFFF,green/K10846%09%23FFFFFF,green/K10747%09%23FFFFFF,green/K10140%09%23FFFFFF,green/K03505%09%23FFFFFF,green/K02324%09%23FFFFFF,green/K10740%09%23FFFFFF,green/K10755%09%23FFFFFF,green/K03142%09%23FFFFFF,green/
mmu00514	Other types of O-glycan biosynthesis	Metabolism	Glycan biosynthesis and metabolism	2	5	7	22	0.124235	0.26274	ENSMUSG00000028538(St3gal3),ENSMUSG00000020260(Pofut2)	ENSMUSG00000029570(Lfng),ENSMUSG00000025158(Rfng),ENSMUSG00000022885(St6gal1),ENSMUSG00000035245(Eogt),ENSMUSG00000028413(B4galt1)	http://www.kegg.jp/kegg-bin/show_pathway?map00514/K07966%09%23FFFFFF,green/K05948%09%23FFFFFF,green/K03691%09%23FFFFFF,red/K00778%09%23FFFFFF,green/K18134%09%23FFFFFF,green/K00781%09%23FFFFFF,red/
mmu05414	Dilated cardiomyopathy (DCM)	Human Diseases	Cardiovascular diseases	13	8	21	83	0.125635	0.263919	ENSMUSG00000003352(Cacnb3),ENSMUSG00000025321(Itgb8),ENSMUSG00000062825(Actg1),ENSMUSG00000053395(Cacng8),ENSMUSG00000039115(Itga9),ENSMUSG00000025809(Itgb1),ENSMUSG00000000555(Itga5),ENSMUSG00000027009(Itga4),ENSMUSG00000042284(Itga1),ENSMUSG00000031799(Tpm4),ENSMUSG00000002100(Mybpc3),ENSMUSG00000029580(Actb),ENSMUSG00000024401(Tnf)	ENSMUSG00000039952(Dag1),ENSMUSG00000005580(Adcy9),ENSMUSG00000022817(Itgb5),ENSMUSG00000027111(Itga6),ENSMUSG00000015968(Cacna1d),ENSMUSG00000020689(Itgb3),ENSMUSG00000021253(Tgfb3),ENSMUSG00000020654(Adcy3)	http://www.kegg.jp/kegg-bin/show_pathway?map05414/K08043%09%23FFFFFF,green/K04873%09%23FFFFFF,red/K06585%09%23FFFFFF,red/K05692%09%23FFFFFF,red/K06588%09%23FFFFFF,green/K06480%09%23FFFFFF,red/K04851%09%23FFFFFF,green/K05719%09%23FFFFFF,red/K06483%09%23FFFFFF,red/K06484%09%23FFFFFF,red/K10375%09%23FFFFFF,red/K12568%09%23FFFFFF,red/K06265%09%23FFFFFF,green/K06485%09%23FFFFFF,green/K08049%09%23FFFFF…
mmu04930	Type II diabetes mellitus	Human Diseases	Endocrine and metabolic diseases	8	5	13	48	0.134405	0.280459	ENSMUSG00000024401(Tnf),ENSMUSG00000000628(Hk2),ENSMUSG00000020866(Cacna1g),ENSMUSG00000021936(Mapk8),ENSMUSG00000021948(Prkcd),ENSMUSG00000038037(Socs1),ENSMUSG00000053113(Socs3),ENSMUSG00000041417(Pik3r1)	ENSMUSG00000031834(Pik3r2),ENSMUSG00000020027(Socs2),ENSMUSG00000038894(Irs2),ENSMUSG00000015968(Cacna1d),ENSMUSG00000055980(Irs1)	http://www.kegg.jp/kegg-bin/show_pathway?map04930/K04696%09%23FFFFFF,red/K07187%09%23FFFFFF,green/K04851%09%23FFFFFF,green/K03156%09%23FFFFFF,red/K04854%09%23FFFFFF,red/K04440%09%23FFFFFF,red/K16172%09%23FFFFFF,green/K04695%09%23FFFFFF,green/K04694%09%23FFFFFF,red/K02649%09%23FFFFFF,purple/K00844%09%23FFFFFF,red/K06068%09%23FFFFFF,red/
mmu04120	Ubiquitin mediated proteolysis	Genetic Information Processing	Folding, sorting and degradation	22	11	33	139	0.135588	0.281054	ENSMUSG00000032000(Birc3),ENSMUSG00000057367(Birc2),ENSMUSG00000032596(Uba7),ENSMUSG00000036986(Pml),ENSMUSG00000060860(Ube2s),ENSMUSG00000023286(Ube2j2),ENSMUSG00000040749(Siah1b),ENSMUSG00000058317(Ube2e2),ENSMUSG00000014349(Ube2z),ENSMUSG00000024231(Cul2),ENSMUSG00000028277(Ube2j1),ENSMUSG00000025939(Ube2w),ENSMUSG00000074781(Ube2n),ENSMUSG00000021774(Ube2e1),ENSMUSG00000079658(Eloc),ENSMUSG00…	ENSMUSG00000041058(Wwp1),ENSMUSG00000021754(Map3k1),ENSMUSG00000028086(Fbxw7),ENSMUSG00000002109(Ddb2),ENSMUSG00000028101(Pias3),ENSMUSG00000017146(Brca1),ENSMUSG00000054115(Skp2),ENSMUSG00000019944(Rhobtb1),ENSMUSG00000023826(Prkn),ENSMUSG00000022075(Rhobtb2),ENSMUSG00000038545(Cul7)	http://www.kegg.jp/kegg-bin/show_pathway?map04120/K07868%09%23FFFFFF,green/K10605%09%23FFFFFF,green/K04694%09%23FFFFFF,red/K10260%09%23FFFFFF,green/K04696%09%23FFFFFF,red/K03872%09%23FFFFFF,red/K10688%09%23FFFFFF,red/K10140%09%23FFFFFF,green/K05633%09%23FFFFFF,green/K04554%09%23FFFFFF,red/K10580%09%23FFFFFF,red/K10578%09%23FFFFFF,red/K03870%09%23FFFFFF,red/K10583%09%23FFFFFF,red/K06689%09%23FFFFF…
mmu04728	Dopaminergic synapse	Organismal Systems	Nervous system	17	14	31	130	0.138447	0.285091	ENSMUSG00000009630(Ppp2cb),ENSMUSG00000053819(Camk2d),ENSMUSG00000053137(Mapk11),ENSMUSG00000024639(Gnaq),ENSMUSG00000053007(Creb5),ENSMUSG00000006740(Kif5b),ENSMUSG00000014956(Ppp1cb),ENSMUSG00000029064(Gnb1),ENSMUSG00000020349(Ppp2ca),ENSMUSG00000001175(Calm1),ENSMUSG00000036402(Gng12),ENSMUSG00000026626(Ppp2r5a),ENSMUSG00000021936(Mapk8),ENSMUSG00000052889(Prkcb),ENSMUSG00000053436(Mapk14),ENS…	ENSMUSG00000042644(Itpr3),ENSMUSG00000026764(Kif5c),ENSMUSG00000040061(Plcb2),ENSMUSG00000015968(Cacna1d),ENSMUSG00000000326(Comt),ENSMUSG00000048240(Gng7),ENSMUSG00000038648(Creb3l2),ENSMUSG00000021820(Camk2g),ENSMUSG00000043004(Gng2),ENSMUSG00000032192(Gnb5),ENSMUSG00000030102(Itpr1),ENSMUSG00000032766(Gng11),ENSMUSG00000074657(Kif5a),ENSMUSG00000021250(Fos)	http://www.kegg.jp/kegg-bin/show_pathway?map04728/K10396%09%23FFFFFF,purple/K04539%09%23FFFFFF,green/K04379%09%23FFFFFF,green/K04354%09%23FFFFFF,red/K19662%09%23FFFFFF,red/K04851%09%23FFFFFF,green/K11584%09%23FFFFFF,red/K07826%09%23FFFFFF,green/K05858%09%23FFFFFF,green/K09048%09%23FFFFFF,green/K04382%09%23FFFFFF,red/K06269%09%23FFFFFF,red/K04634%09%23FFFFFF,red/K04347%09%23FFFFFF,red/K04536%09%23…
mmu00650	Butanoate metabolism	Metabolism	Carbohydrate metabolism	2	6	8	27	0.144936	0.294578	ENSMUSG00000062480(Acat3),ENSMUSG00000093930(Hmgcs1)	ENSMUSG00000022853(Ehhadh),ENSMUSG00000020988(L2hgdh),ENSMUSG00000022186(Oxct1),ENSMUSG00000027984(Hadh),ENSMUSG00000025465(Echs1),ENSMUSG00000028672(Hmgcl)	http://www.kegg.jp/kegg-bin/show_pathway?map00650/K07514%09%23FFFFFF,green/K01641%09%23FFFFFF,red/K01640%09%23FFFFFF,green/K01027%09%23FFFFFF,green/K07511%09%23FFFFFF,green/K00109%09%23FFFFFF,green/K00626%09%23FFFFFF,red/K00022%09%23FFFFFF,green/
mmu04392	Hippo signaling pathway - multiple species	Environmental Information Processing	Signal transduction	4	4	8	27	0.144936	0.294578	ENSMUSG00000040021(Lats1),ENSMUSG00000006262(Mob1b),ENSMUSG00000021067(Sav1),ENSMUSG00000042129(Rassf4)	ENSMUSG00000027339(Rassf2),ENSMUSG00000018849(Wwc1),ENSMUSG00000036862(Dchs1),ENSMUSG00000022433(Csnk1e)	http://www.kegg.jp/kegg-bin/show_pathway?map04392/K06685%09%23FFFFFF,red/K09851%09%23FFFFFF,purple/K16507%09%23FFFFFF,green/K08960%09%23FFFFFF,green/K16685%09%23FFFFFF,green/K16686%09%23FFFFFF,red/K08791%09%23FFFFFF,red/
mmu04022	cGMP-PKG signaling pathway	Environmental Information Processing	Signal transduction	19	19	38	164	0.150923	0.304768	ENSMUSG00000020573(Pik3cg),ENSMUSG00000008892(Vdac3),ENSMUSG00000021868(Ppif),ENSMUSG00000020580(Rock2),ENSMUSG00000053007(Creb5),ENSMUSG00000000441(Raf1),ENSMUSG00000024639(Gnaq),ENSMUSG00000004936(Map2k1),ENSMUSG00000014956(Ppp1cb),ENSMUSG00000053965(Pde5a),ENSMUSG00000030403(Vasp),ENSMUSG00000024290(Rock1),ENSMUSG00000026463(Atp2b4),ENSMUSG00000022122(Ednrb),ENSMUSG00000020901(Pik3r5),ENSMUSG0…	ENSMUSG00000000149(Gna12),ENSMUSG00000045875(Adra1a),ENSMUSG00000042644(Itpr3),ENSMUSG00000030671(Pde3b),ENSMUSG00000030102(Itpr1),ENSMUSG00000026360(Rgs2),ENSMUSG00000020654(Adcy3),ENSMUSG00000038894(Irs2),ENSMUSG00000040061(Plcb2),ENSMUSG00000023079(Gtf2ird1),ENSMUSG00000005580(Adcy9),ENSMUSG00000027931(Npr1),ENSMUSG00000038648(Creb3l2),ENSMUSG00000055980(Irs1),ENSMUSG00000054640(Slc8a1),ENSMUS…	http://www.kegg.jp/kegg-bin/show_pathway?map04022/K08049%09%23FFFFFF,green/K18154%09%23FFFFFF,green/K03121%09%23FFFFFF,green/K13762%09%23FFFFFF,red/K16172%09%23FFFFFF,green/K04514%09%23FFFFFF,red/K13296%09%23FFFFFF,green/K05858%09%23FFFFFF,green/K21290%09%23FFFFFF,red/K07187%09%23FFFFFF,green/K04366%09%23FFFFFF,red/K04135%09%23FFFFFF,green/K09048%09%23FFFFFF,green/K08043%09%23FFFFFF,green/K04368%…
mmu00670	One carbon pool by folate	Metabolism	Metabolism of cofactors and vitamins	3	3	6	19	0.153775	0.308535	ENSMUSG00000029376(Mthfd2l),ENSMUSG00000025747(Tyms),ENSMUSG00000005667(Mthfd2)	ENSMUSG00000021311(Mtr),ENSMUSG00000032607(Amt),ENSMUSG00000021707(Dhfr)	http://www.kegg.jp/kegg-bin/show_pathway?map00670/K00548%09%23FFFFFF,green/K13403%09%23FFFFFF,red/K00560%09%23FFFFFF,red/K00605%09%23FFFFFF,green/K00287%09%23FFFFFF,green/
mmu00640	Propanoate metabolism	Metabolism	Carbohydrate metabolism	3	6	9	32	0.162234	0.321388	ENSMUSG00000062480(Acat3),ENSMUSG00000020664(Dld),ENSMUSG00000032263(Bckdhb)	ENSMUSG00000019883(Echdc1),ENSMUSG00000027452(Acss1),ENSMUSG00000025465(Echs1),ENSMUSG00000022853(Ehhadh),ENSMUSG00000060376(Bckdha),ENSMUSG00000041426(Hibch)	http://www.kegg.jp/kegg-bin/show_pathway?map00640/K01895%09%23FFFFFF,green/K00382%09%23FFFFFF,red/K07511%09%23FFFFFF,green/K18426%09%23FFFFFF,green/K00166%09%23FFFFFF,green/K00167%09%23FFFFFF,red/K07514%09%23FFFFFF,green/K05605%09%23FFFFFF,green/K00626%09%23FFFFFF,red/
mmu04136	Autophagy - other	Cellular Processes	Transport and catabolism	3	6	9	32	0.162234	0.321388	ENSMUSG00000079418(Atg4a),ENSMUSG00000009630(Ppp2cb),ENSMUSG00000020349(Ppp2ca)	ENSMUSG00000021619(Atg10),ENSMUSG00000027244(Atg13),ENSMUSG00000030314(Atg7),ENSMUSG00000004798(Ulk2),ENSMUSG00000028550(Atg4c),ENSMUSG00000041895(Wipi1)	http://www.kegg.jp/kegg-bin/show_pathway?map04136/K17908%09%23FFFFFF,green/K04382%09%23FFFFFF,red/K08337%09%23FFFFFF,green/K08269%09%23FFFFFF,green/K17888%09%23FFFFFF,green/K08331%09%23FFFFFF,green/K08342%09%23FFFFFF,purple/
mmu00270	Cysteine and methionine metabolism	Metabolism	Amino acid metabolism	3	10	13	50	0.170149	0.334947	ENSMUSG00000028124(Gclm),ENSMUSG00000027610(Gss),ENSMUSG00000028179(Cth)	ENSMUSG00000004996(Mri1),ENSMUSG00000025190(Got1),ENSMUSG00000044986(Tst),ENSMUSG00000021311(Mtr),ENSMUSG00000020661(Dnmt3a),ENSMUSG00000020629(Adi1),ENSMUSG00000071711(Mpst),ENSMUSG00000027478(Dnmt3b),ENSMUSG00000039648(Kyat1),ENSMUSG00000004099(Dnmt1)	http://www.kegg.jp/kegg-bin/show_pathway?map00270/K00548%09%23FFFFFF,green/K08967%09%23FFFFFF,green/K11205%09%23FFFFFF,red/K00558%09%23FFFFFF,green/K01758%09%23FFFFFF,red/K00816%09%23FFFFFF,green/K01011%09%23FFFFFF,green/K17398%09%23FFFFFF,green/K08963%09%23FFFFFF,green/K17399%09%23FFFFFF,green/K21456%09%23FFFFFF,red/K14454%09%23FFFFFF,green/
mmu04152	AMPK signaling pathway	Environmental Information Processing	Signal transduction	14	15	29	124	0.175178	0.341807	ENSMUSG00000022052(Ppp2r2a),ENSMUSG00000021670(Hmgcr),ENSMUSG00000020349(Ppp2ca),ENSMUSG00000053007(Creb5),ENSMUSG00000021196(Pfkp),ENSMUSG00000029174(Tbc1d1),ENSMUSG00000028945(Rheb),ENSMUSG00000041417(Pik3r1),ENSMUSG00000020277(Pfkl),ENSMUSG00000020671(Rab10),ENSMUSG00000040028(Elavl1),ENSMUSG00000029471(Camkk2),ENSMUSG00000026626(Ppp2r5a),ENSMUSG00000009630(Ppp2cb)	ENSMUSG00000038648(Creb3l2),ENSMUSG00000028944(Prkag2),ENSMUSG00000029512(Ulk1),ENSMUSG00000025203(Scd2),ENSMUSG00000045875(Adra1a),ENSMUSG00000044167(Foxo1),ENSMUSG00000000440(Pparg),ENSMUSG00000040618(Pck2),ENSMUSG00000070348(Ccnd1),ENSMUSG00000026409(Pfkfb2),ENSMUSG00000055980(Irs1),ENSMUSG00000038894(Irs2),ENSMUSG00000031834(Pik3r2),ENSMUSG00000035064(Eef2k),ENSMUSG00000048756(Foxo3)	http://www.kegg.jp/kegg-bin/show_pathway?map04152/K00850%09%23FFFFFF,red/K07208%09%23FFFFFF,red/K02649%09%23FFFFFF,purple/K07200%09%23FFFFFF,green/K11584%09%23FFFFFF,red/K07359%09%23FFFFFF,red/K00021%09%23FFFFFF,red/K07201%09%23FFFFFF,green/K04354%09%23FFFFFF,red/K04503%09%23FFFFFF,green/K08530%09%23FFFFFF,green/K07187%09%23FFFFFF,green/K21357%09%23FFFFFF,green/K07903%09%23FFFFFF,red/K04382%09%23…
mmu00471	D-Glutamine and D-glutamate metabolism	Metabolism	Metabolism of other amino acids	1	1	2	4	0.175817	0.341807	ENSMUSG00000026103(Gls)	ENSMUSG00000021185(Dglucy)	http://www.kegg.jp/kegg-bin/show_pathway?map00471/K01425%09%23FFFFFF,red/K22210%09%23FFFFFF,green/
mmu05310	Asthma	Human Diseases	Immune diseases	6	1	7	24	0.177605	0.34315	ENSMUSG00000073421(H2-Ab1),ENSMUSG00000024401(Tnf),ENSMUSG00000027073(Prg2),ENSMUSG00000017652(Cd40),ENSMUSG00000016529(Il10),ENSMUSG00000024334(H2-Oa)	ENSMUSG00000000869(Il4)	http://www.kegg.jp/kegg-bin/show_pathway?map05310/K05443%09%23FFFFFF,red/K03156%09%23FFFFFF,red/K10786%09%23FFFFFF,red/K05430%09%23FFFFFF,green/K03160%09%23FFFFFF,red/K06752%09%23FFFFFF,red/
mmu00220	Arginine biosynthesis	Metabolism	Amino acid metabolism	3	3	6	20	0.185176	0.35408	ENSMUSG00000020826(Nos2),ENSMUSG00000076441(Ass1),ENSMUSG00000026103(Gls)	ENSMUSG00000025190(Got1),ENSMUSG00000022546(Gpt),ENSMUSG00000026473(Glul)	http://www.kegg.jp/kegg-bin/show_pathway?map00220/K01940%09%23FFFFFF,red/K00814%09%23FFFFFF,green/K13241%09%23FFFFFF,red/K01915%09%23FFFFFF,green/K14454%09%23FFFFFF,green/K01425%09%23FFFFFF,red/
mmu05412	Arrhythmogenic right ventricular cardiomyopathy (ARVC)	Human Diseases	Cardiovascular diseases	11	6	17	69	0.185525	0.35408	ENSMUSG00000042284(Itga1),ENSMUSG00000027009(Itga4),ENSMUSG00000039115(Itga9),ENSMUSG00000062825(Actg1),ENSMUSG00000053395(Cacng8),ENSMUSG00000000555(Itga5),ENSMUSG00000029580(Actb),ENSMUSG00000050953(Gja1),ENSMUSG00000025809(Itgb1),ENSMUSG00000025321(Itgb8),ENSMUSG00000003352(Cacnb3)	ENSMUSG00000015968(Cacna1d),ENSMUSG00000020689(Itgb3),ENSMUSG00000022817(Itgb5),ENSMUSG00000027111(Itga6),ENSMUSG00000039952(Dag1),ENSMUSG00000001552(Jup)	http://www.kegg.jp/kegg-bin/show_pathway?map05412/K06591%09%23FFFFFF,red/K07372%09%23FFFFFF,red/K06484%09%23FFFFFF,red/K05719%09%23FFFFFF,red/K04873%09%23FFFFFF,red/K06585%09%23FFFFFF,red/K05692%09%23FFFFFF,red/K06485%09%23FFFFFF,green/K06480%09%23FFFFFF,red/K04851%09%23FFFFFF,green/K06588%09%23FFFFFF,green/K06265%09%23FFFFFF,green/K06493%09%23FFFFFF,green/K06483%09%23FFFFFF,red/K04864%09%23FFFFF…
mmu05014	Amyotrophic lateral sclerosis (ALS)	Human Diseases	Neurodegenerative diseases	10	3	13	51	0.189628	0.357552	ENSMUSG00000002307(Daxx),ENSMUSG00000024401(Tnf),ENSMUSG00000022092(Ppp3cc),ENSMUSG00000053436(Mapk14),ENSMUSG00000028599(Tnfrsf1b),ENSMUSG00000004446(Bid),ENSMUSG00000063694(Cycs),ENSMUSG00000071369(Map3k5),ENSMUSG00000025888(Casp1),ENSMUSG00000053137(Mapk11)	ENSMUSG00000028914(Casp9),ENSMUSG00000020623(Map2k6),ENSMUSG00000031628(Casp3)	http://www.kegg.jp/kegg-bin/show_pathway?map05014/K04399%09%23FFFFFF,green/K04726%09%23FFFFFF,red/K04426%09%23FFFFFF,red/K05141%09%23FFFFFF,red/K04348%09%23FFFFFF,red/K02187%09%23FFFFFF,green/K04441%09%23FFFFFF,red/K08738%09%23FFFFFF,red/K01370%09%23FFFFFF,red/K04433%09%23FFFFFF,green/K02308%09%23FFFFFF,red/K03156%09%23FFFFFF,red/
mmu00071	Fatty acid degradation	Metabolism	Lipid metabolism	6	7	13	51	0.189628	0.357552	ENSMUSG00000021417(Eci2),ENSMUSG00000055301(Adh7),ENSMUSG00000024981(Acsl5),ENSMUSG00000062480(Acat3),ENSMUSG00000018796(Acsl1),ENSMUSG00000031278(Acsl4)	ENSMUSG00000025465(Echs1),ENSMUSG00000027984(Hadh),ENSMUSG00000026687(Aldh9a1),ENSMUSG00000029098(Acox3),ENSMUSG00000003809(Gcdh),ENSMUSG00000036880(Acaa2),ENSMUSG00000022853(Ehhadh)	http://www.kegg.jp/kegg-bin/show_pathway?map00071/K07511%09%23FFFFFF,green/K07508%09%23FFFFFF,green/K01897%09%23FFFFFF,red/K00149%09%23FFFFFF,green/K13239%09%23FFFFFF,red/K13951%09%23FFFFFF,red/K00626%09%23FFFFFF,red/K07514%09%23FFFFFF,green/K00022%09%23FFFFFF,green/K00252%09%23FFFFFF,green/K00232%09%23FFFFFF,green/
mmu00072	Synthesis and degradation of ketone bodies	Metabolism	Lipid metabolism	2	2	4	12	0.196811	0.368873	ENSMUSG00000093930(Hmgcs1),ENSMUSG00000062480(Acat3)	ENSMUSG00000022186(Oxct1),ENSMUSG00000028672(Hmgcl)	http://www.kegg.jp/kegg-bin/show_pathway?map00072/K01640%09%23FFFFFF,green/K01641%09%23FFFFFF,red/K00626%09%23FFFFFF,red/K01027%09%23FFFFFF,green/
mmu04725	Cholinergic synapse	Organismal Systems	Nervous system	12	14	26	112	0.202165	0.376652	ENSMUSG00000053819(Camk2d),ENSMUSG00000046207(Pik3r6),ENSMUSG00000041417(Pik3r1),ENSMUSG00000020901(Pik3r5),ENSMUSG00000020573(Pik3cg),ENSMUSG00000053007(Creb5),ENSMUSG00000024639(Gnaq),ENSMUSG00000036402(Gng12),ENSMUSG00000029064(Gnb1),ENSMUSG00000004936(Map2k1),ENSMUSG00000052889(Prkcb),ENSMUSG00000024789(Jak2)	ENSMUSG00000040061(Plcb2),ENSMUSG00000020654(Adcy3),ENSMUSG00000042644(Itpr3),ENSMUSG00000015968(Cacna1d),ENSMUSG00000005580(Adcy9),ENSMUSG00000048240(Gng7),ENSMUSG00000021820(Camk2g),ENSMUSG00000038648(Creb3l2),ENSMUSG00000031834(Pik3r2),ENSMUSG00000043004(Gng2),ENSMUSG00000032192(Gnb5),ENSMUSG00000032766(Gng11),ENSMUSG00000030102(Itpr1),ENSMUSG00000021250(Fos)	http://www.kegg.jp/kegg-bin/show_pathway?map04725/K04368%09%23FFFFFF,red/K04347%09%23FFFFFF,red/K04851%09%23FFFFFF,green/K09048%09%23FFFFFF,green/K04539%09%23FFFFFF,green/K08049%09%23FFFFFF,green/K04958%09%23FFFFFF,green/K04536%09%23FFFFFF,red/K04515%09%23FFFFFF,purple/K21289%09%23FFFFFF,red/K04447%09%23FFFFFF,red/K04379%09%23FFFFFF,green/K02649%09%23FFFFFF,purple/K04543%09%23FFFFFF,green/K05858%…
mmu04390	Hippo signaling pathway	Environmental Information Processing	Signal transduction	20	14	34	150	0.203411	0.376732	ENSMUSG00000022346(Myc),ENSMUSG00000022052(Ppp2r2a),ENSMUSG00000021067(Sav1),ENSMUSG00000040021(Lats1),ENSMUSG00000006262(Mob1b),ENSMUSG00000029580(Actb),ENSMUSG00000020349(Ppp2ca),ENSMUSG00000045005(Fzd5),ENSMUSG00000044674(Fzd1),ENSMUSG00000054932(Afp),ENSMUSG00000062825(Actg1),ENSMUSG00000014956(Ppp1cb),ENSMUSG00000022285(Ywhaz),ENSMUSG00000000184(Ccnd2),ENSMUSG00000033227(Wnt6),ENSMUSG0000002…	ENSMUSG00000000881(Dlg3),ENSMUSG00000005699(Pard6a),ENSMUSG00000020888(Dvl2),ENSMUSG00000061859(Patj),ENSMUSG00000025880(Smad7),ENSMUSG00000018849(Wwc1),ENSMUSG00000041688(Amot),ENSMUSG00000021253(Tgfb3),ENSMUSG00000042745(Id1),ENSMUSG00000032440(Tgfbr2),ENSMUSG00000002083(Bbc3),ENSMUSG00000056214(Pard6g),ENSMUSG00000070348(Ccnd1),ENSMUSG00000022433(Csnk1e)	http://www.kegg.jp/kegg-bin/show_pathway?map04390/K13377%09%23FFFFFF,green/K06093%09%23FFFFFF,green/K10151%09%23FFFFFF,red/K03982%09%23FFFFFF,red/K16144%09%23FFFFFF,red/K04377%09%23FFFFFF,red/K02353%09%23FFFFFF,green/K09782%09%23FFFFFF,red/K02432%09%23FFFFFF,red/K21098%09%23FFFFFF,green/K04503%09%23FFFFFF,green/K16685%09%23FFFFFF,green/K06269%09%23FFFFFF,red/K16197%09%23FFFFFF,red/K00445%09%23FFF…
mmu03320	PPAR signaling pathway	Organismal Systems	Endocrine system	8	12	20	85	0.220335	0.403886	ENSMUSG00000024981(Acsl5),ENSMUSG00000030162(Olr1),ENSMUSG00000018796(Acsl1),ENSMUSG00000028773(Fabp3),ENSMUSG00000031278(Acsl4),ENSMUSG00000011305(Plin5),ENSMUSG00000025059(Gk),ENSMUSG00000041620(Mmp1b)	ENSMUSG00000040618(Pck2),ENSMUSG00000028494(Plin2),ENSMUSG00000002289(Angptl4),ENSMUSG00000062515(Fabp4),ENSMUSG00000029098(Acox3),ENSMUSG00000026170(Cyp27a1),ENSMUSG00000025203(Scd2),ENSMUSG00000000440(Pparg),ENSMUSG00000022853(Ehhadh),ENSMUSG00000015846(Rxra),ENSMUSG00000024600(Slc27a6),ENSMUSG00000031808(Slc27a1)	http://www.kegg.jp/kegg-bin/show_pathway?map03320/K08752%09%23FFFFFF,red/K08767%09%23FFFFFF,green/K08749%09%23FFFFFF,green/K08763%09%23FFFFFF,red/K00488%09%23FFFFFF,green/K08524%09%23FFFFFF,green/K08753%09%23FFFFFF,green/K01388%09%23FFFFFF,red/K08530%09%23FFFFFF,green/K07514%09%23FFFFFF,green/K01897%09%23FFFFFF,red/K00864%09%23FFFFFF,red/K17284%09%23FFFFFF,green/K00232%09%23FFFFFF,green/K00507%09…
mmu04934	Cushing's syndrome	Human Diseases	Endocrine and metabolic diseases	18	18	36	161	0.220653	0.403886	ENSMUSG00000020866(Cacna1g),ENSMUSG00000004936(Map2k1),ENSMUSG00000020122(Egfr),ENSMUSG00000023034(Nr4a1),ENSMUSG00000002413(Braf),ENSMUSG00000019256(Ahr),ENSMUSG00000023067(Cdkn1a),ENSMUSG00000033227(Wnt6),ENSMUSG00000015957(Wnt11),ENSMUSG00000073802(Cdkn2b),ENSMUSG00000040274(Cdk6),ENSMUSG00000053819(Camk2d),ENSMUSG00000044674(Fzd1),ENSMUSG00000045005(Fzd5),ENSMUSG00000032193(Ldlr),ENSMUSG00000…	ENSMUSG00000018983(E2f2),ENSMUSG00000028551(Cdkn2c),ENSMUSG00000020888(Dvl2),ENSMUSG00000027698(Nceh1),ENSMUSG00000034379(Wdr5b),ENSMUSG00000030102(Itpr1),ENSMUSG00000002068(Ccne1),ENSMUSG00000039956(Mrap),ENSMUSG00000015968(Cacna1d),ENSMUSG00000070348(Ccnd1),ENSMUSG00000040061(Plcb2),ENSMUSG00000020654(Adcy3),ENSMUSG00000042644(Itpr3),ENSMUSG00000021820(Camk2g),ENSMUSG00000038648(Creb3l2),ENSMUS…	http://www.kegg.jp/kegg-bin/show_pathway?map04934/K14963%09%23FFFFFF,green/K01384%09%23FFFFFF,red/K02353%09%23FFFFFF,green/K09093%09%23FFFFFF,red/K00445%09%23FFFFFF,red/K02375%09%23FFFFFF,red/K06618%09%23FFFFFF,green/K04958%09%23FFFFFF,green/K09389%09%23FFFFFF,green/K06622%09%23FFFFFF,green/K04503%09%23FFFFFF,green/K09048%09%23FFFFFF,green/K08049%09%23FFFFFF,green/K14349%09%23FFFFFF,green/K04515%…
mmu00910	Nitrogen metabolism	Metabolism	Energy metabolism	2	3	5	17	0.230741	0.417467	ENSMUSG00000027555(Car13),ENSMUSG00000027562(Car2)	ENSMUSG00000026473(Glul),ENSMUSG00000028463(Car9),ENSMUSG00000031883(Car7)	http://www.kegg.jp/kegg-bin/show_pathway?map00910/K01672%09%23FFFFFF,purple/K01915%09%23FFFFFF,green/K18245%09%23FFFFFF,red/
mmu00450	Selenocompound metabolism	Metabolism	Metabolism of other amino acids	2	3	5	17	0.230741	0.417467	ENSMUSG00000020250(Txnrd1),ENSMUSG00000028179(Cth)	ENSMUSG00000039648(Kyat1),ENSMUSG00000021311(Mtr),ENSMUSG00000063179(Pstk)	http://www.kegg.jp/kegg-bin/show_pathway?map00450/K22182%09%23FFFFFF,red/K00548%09%23FFFFFF,green/K00816%09%23FFFFFF,green/K01758%09%23FFFFFF,red/K10837%09%23FFFFFF,green/
mmu00601	Glycosphingolipid biosynthesis - lacto and neolacto series	Metabolism	Glycan biosynthesis and metabolism	3	4	7	26	0.238855	0.429665	ENSMUSG00000028538(St3gal3),ENSMUSG00000022686(B3gnt5),ENSMUSG00000051650(B3gnt2)	ENSMUSG00000022793(B4galt4),ENSMUSG00000074892(B3galt5),ENSMUSG00000036587(Fut7),ENSMUSG00000028413(B4galt1)	http://www.kegg.jp/kegg-bin/show_pathway?map00601/K07966%09%23FFFFFF,green/K07969%09%23FFFFFF,green/K00741%09%23FFFFFF,red/K00781%09%23FFFFFF,red/K03877%09%23FFFFFF,green/K07635%09%23FFFFFF,green/K03766%09%23FFFFFF,red/
mmu03450	Non-homologous end-joining	Genetic Information Processing	Replication and repair	1	3	4	13	0.242713	0.432777	ENSMUSG00000020474(Polm)	ENSMUSG00000026187(Xrcc5),ENSMUSG00000022672(Prkdc),ENSMUSG00000022471(Xrcc6)	http://www.kegg.jp/kegg-bin/show_pathway?map03450/K06642%09%23FFFFFF,green/K03513%09%23FFFFFF,red/K10885%09%23FFFFFF,green/K10884%09%23FFFFFF,green/
mmu04550	Signaling pathways regulating pluripotency of stem cells	Cellular Processes	Cellular community - eukaryotes	19	11	30	134	0.243351	0.432777	ENSMUSG00000024789(Jak2),ENSMUSG00000022346(Myc),ENSMUSG00000053436(Mapk14),ENSMUSG00000000532(Acvr1b),ENSMUSG00000045005(Fzd5),ENSMUSG00000033623(Pcgf3),ENSMUSG00000044674(Fzd1),ENSMUSG00000027660(Skil),ENSMUSG00000053137(Mapk11),ENSMUSG00000033227(Wnt6),ENSMUSG00000024805(Pcgf5),ENSMUSG00000041417(Pik3r1),ENSMUSG00000004040(Stat3),ENSMUSG00000034394(Lif),ENSMUSG00000041324(Inhba),ENSMUSG0000000…	ENSMUSG00000021756(Il6st),ENSMUSG00000042745(Id1),ENSMUSG00000020888(Dvl2),ENSMUSG00000027796(Smad9),ENSMUSG00000054263(Lifr),ENSMUSG00000025050(Pcgf6),ENSMUSG00000031383(Dusp9),ENSMUSG00000061393(Acvr2b),ENSMUSG00000038872(Zfhx3),ENSMUSG00000031834(Pik3r2),ENSMUSG00000031565(Fgfr1)	http://www.kegg.jp/kegg-bin/show_pathway?map04550/K05060%09%23FFFFFF,green/K04667%09%23FFFFFF,red/K04680%09%23FFFFFF,green/K04441%09%23FFFFFF,red/K02649%09%23FFFFFF,purple/K05419%09%23FFFFFF,red/K18498%09%23FFFFFF,green/K04368%09%23FFFFFF,red/K04377%09%23FFFFFF,red/K01384%09%23FFFFFF,red/K11489%09%23FFFFFF,red/K13596%09%23FFFFFF,green/K04362%09%23FFFFFF,green/K04447%09%23FFFFFF,red/K04692%09%23FF…
mmu00750	Vitamin B6 metabolism	Metabolism	Metabolism of cofactors and vitamins	1	2	3	9	0.25323	0.447523	ENSMUSG00000063558(Aox1)	ENSMUSG00000032788(Pdxk),ENSMUSG00000018659(Pnpo)	http://www.kegg.jp/kegg-bin/show_pathway?map00750/K00868%09%23FFFFFF,green/K00157%09%23FFFFFF,red/K00275%09%23FFFFFF,green/
mmu00630	Glyoxylate and dicarboxylate metabolism	Metabolism	Carbohydrate metabolism	3	5	8	31	0.254502	0.447523	ENSMUSG00000005683(Cs),ENSMUSG00000020664(Dld),ENSMUSG00000062480(Acat3)	ENSMUSG00000026473(Glul),ENSMUSG00000032607(Amt),ENSMUSG00000025176(Hoga1),ENSMUSG00000035637(Grhpr),ENSMUSG00000027452(Acss1)	http://www.kegg.jp/kegg-bin/show_pathway?map00630/K00382%09%23FFFFFF,red/K01895%09%23FFFFFF,green/K00605%09%23FFFFFF,green/K01647%09%23FFFFFF,red/K01915%09%23FFFFFF,green/K18123%09%23FFFFFF,green/K00626%09%23FFFFFF,red/K00049%09%23FFFFFF,green/
mmu04371	Apelin signaling pathway	Environmental Information Processing	Signal transduction	15	15	30	135	0.257373	0.450043	ENSMUSG00000038387(Rras),ENSMUSG00000029304(Spp1),ENSMUSG00000046207(Pik3r6),ENSMUSG00000037411(Serpine1),ENSMUSG00000055723(Rras2),ENSMUSG00000020901(Pik3r5),ENSMUSG00000020826(Nos2),ENSMUSG00000000441(Raf1),ENSMUSG00000036402(Gng12),ENSMUSG00000001175(Calm1),ENSMUSG00000029064(Gnb1),ENSMUSG00000020573(Pik3cg),ENSMUSG00000024639(Gnaq),ENSMUSG00000004936(Map2k1),ENSMUSG00000027276(Jag1)	ENSMUSG00000005583(Mef2c),ENSMUSG00000070348(Ccnd1),ENSMUSG00000020654(Adcy3),ENSMUSG00000040061(Plcb2),ENSMUSG00000042644(Itpr3),ENSMUSG00000054640(Slc8a1),ENSMUSG00000008855(Hdac5),ENSMUSG00000005580(Adcy9),ENSMUSG00000048240(Gng7),ENSMUSG00000043004(Gng2),ENSMUSG00000032192(Gnb5),ENSMUSG00000030671(Pde3b),ENSMUSG00000028944(Prkag2),ENSMUSG00000032766(Gng11),ENSMUSG00000030102(Itpr1)	http://www.kegg.jp/kegg-bin/show_pathway?map04371/K08043%09%23FFFFFF,green/K04454%09%23FFFFFF,green/K04539%09%23FFFFFF,green/K05858%09%23FFFFFF,green/K13241%09%23FFFFFF,red/K07829%09%23FFFFFF,red/K04347%09%23FFFFFF,red/K21289%09%23FFFFFF,red/K21290%09%23FFFFFF,red/K02183%09%23FFFFFF,red/K07826%09%23FFFFFF,green/K04536%09%23FFFFFF,red/K13296%09%23FFFFFF,green/K04366%09%23FFFFFF,red/K04958%09%23FFF…
mmu05320	Autoimmune thyroid disease	Human Diseases	Immune diseases	14	2	16	69	0.273043	0.474639	ENSMUSG00000073421(H2-Ab1),ENSMUSG00000067212(H2-T23),ENSMUSG00000053835(H2-T24),ENSMUSG00000017652(Cd40),ENSMUSG00000056116(H2-T22),ENSMUSG00000016529(Il10),ENSMUSG00000024778(Fas),ENSMUSG00000092243(Gm7030),ENSMUSG00000022901(Cd86),ENSMUSG00000024334(H2-Oa),ENSMUSG00000075122(Cd80),ENSMUSG00000016283(H2-M2),ENSMUSG00000061232(H2-K1),ENSMUSG00000035929(H2-Q4)	ENSMUSG00000000869(Il4),ENSMUSG00000026012(Cd28)	http://www.kegg.jp/kegg-bin/show_pathway?map05320/K05413%09%23FFFFFF,red/K06470%09%23FFFFFF,green/K06752%09%23FFFFFF,red/K05412%09%23FFFFFF,red/K05430%09%23FFFFFF,green/K03160%09%23FFFFFF,red/K04390%09%23FFFFFF,red/K06751%09%23FFFFFF,red/K05443%09%23FFFFFF,red/
mmu05150	Staphylococcus aureus infection	Human Diseases	Infectious diseases: Bacterial	12	1	13	55	0.276601	0.474639	ENSMUSG00000016529(Il10),ENSMUSG00000030830(Itgal),ENSMUSG00000090231(Cfb),ENSMUSG00000024334(H2-Oa),ENSMUSG00000037405(Icam1),ENSMUSG00000045551(Fpr1),ENSMUSG00000055172(C1ra),ENSMUSG00000052270(Fpr2),ENSMUSG00000024164(C3),ENSMUSG00000073421(H2-Ab1),ENSMUSG00000049130(C5ar1),ENSMUSG00000026656(Fcgr2b)	ENSMUSG00000059498(Fcgr3)	http://www.kegg.jp/kegg-bin/show_pathway?map05150/K16824%09%23FFFFFF,green/K06752%09%23FFFFFF,red/K04173%09%23FFFFFF,red/K12560%09%23FFFFFF,red/K04172%09%23FFFFFF,red/K05718%09%23FFFFFF,red/K01335%09%23FFFFFF,red/K03990%09%23FFFFFF,red/K04010%09%23FFFFFF,red/K01330%09%23FFFFFF,red/K05443%09%23FFFFFF,red/K06490%09%23FFFFFF,red/
mmu04923	Regulation of lipolysis in adipocytes	Organismal Systems	Endocrine system	3	10	13	55	0.276601	0.474639	ENSMUSG00000060675(Plaat3),ENSMUSG00000041417(Pik3r1),ENSMUSG00000032487(Ptgs2)	ENSMUSG00000027931(Npr1),ENSMUSG00000031834(Pik3r2),ENSMUSG00000030671(Pde3b),ENSMUSG00000047250(Ptgs1),ENSMUSG00000038894(Irs2),ENSMUSG00000020654(Adcy3),ENSMUSG00000055980(Irs1),ENSMUSG00000005580(Adcy9),ENSMUSG00000062515(Fabp4),ENSMUSG00000025509(Pnpla2)	http://www.kegg.jp/kegg-bin/show_pathway?map04923/K02649%09%23FFFFFF,purple/K13296%09%23FFFFFF,green/K12323%09%23FFFFFF,green/K00509%09%23FFFFFF,green/K08049%09%23FFFFFF,green/K16172%09%23FFFFFF,green/K11987%09%23FFFFFF,red/K08043%09%23FFFFFF,green/K16816%09%23FFFFFF,green/K07187%09%23FFFFFF,green/K16817%09%23FFFFFF,red/K08753%09%23FFFFFF,green/
mmu03440	Homologous recombination	Genetic Information Processing	Replication and repair	1	9	10	41	0.277504	0.474639	ENSMUSG00000041238(Rbbp8)	ENSMUSG00000012483(Rpa3),ENSMUSG00000030528(Blm),ENSMUSG00000028702(Rad54l),ENSMUSG00000000751(Rpa1),ENSMUSG00000038644(Pold1),ENSMUSG00000024854(Pold4),ENSMUSG00000041147(Brca2),ENSMUSG00000044702(Palb2),ENSMUSG00000017146(Brca1)	http://www.kegg.jp/kegg-bin/show_pathway?map03440/K03505%09%23FFFFFF,green/K10740%09%23FFFFFF,green/K20773%09%23FFFFFF,red/K08775%09%23FFFFFF,green/K07466%09%23FFFFFF,green/K10897%09%23FFFFFF,green/K10901%09%23FFFFFF,green/K02327%09%23FFFFFF,green/K10875%09%23FFFFFF,green/K10605%09%23FFFFFF,green/
mmu00250	Alanine, aspartate and glutamate metabolism	Metabolism	Amino acid metabolism	2	7	9	37	0.296099	0.50369	ENSMUSG00000026103(Gls),ENSMUSG00000076441(Ass1)	ENSMUSG00000028737(Aldh4a1),ENSMUSG00000048142(Nat8l),ENSMUSG00000011148(Adssl1),ENSMUSG00000026473(Glul),ENSMUSG00000022546(Gpt),ENSMUSG00000020774(Aspa),ENSMUSG00000025190(Got1)	http://www.kegg.jp/kegg-bin/show_pathway?map00250/K01915%09%23FFFFFF,green/K01425%09%23FFFFFF,red/K00814%09%23FFFFFF,green/K01940%09%23FFFFFF,red/K18309%09%23FFFFFF,green/K14454%09%23FFFFFF,green/K01437%09%23FFFFFF,green/K00294%09%23FFFFFF,green/K01939%09%23FFFFFF,green/
mmu04914	Progesterone-mediated oocyte maturation	Organismal Systems	Endocrine system	12	8	20	90	0.30968	0.520161	ENSMUSG00000053436(Mapk14),ENSMUSG00000002413(Braf),ENSMUSG00000020300(Cpeb4),ENSMUSG00000021936(Mapk8),ENSMUSG00000032477(Cdc25a),ENSMUSG00000004936(Map2k1),ENSMUSG00000053137(Mapk11),ENSMUSG00000029910(Mad2l1),ENSMUSG00000021270(Hsp90aa1),ENSMUSG00000020272(Stk10),ENSMUSG00000041417(Pik3r1),ENSMUSG00000000441(Raf1)	ENSMUSG00000030677(Kif22),ENSMUSG00000030671(Pde3b),ENSMUSG00000031834(Pik3r2),ENSMUSG00000025358(Cdk2),ENSMUSG00000039652(Cpeb3),ENSMUSG00000027330(Cdc25b),ENSMUSG00000005580(Adcy9),ENSMUSG00000020654(Adcy3)	http://www.kegg.jp/kegg-bin/show_pathway?map04914/K04079%09%23FFFFFF,red/K04365%09%23FFFFFF,red/K04440%09%23FFFFFF,red/K04366%09%23FFFFFF,red/K10403%09%23FFFFFF,green/K02602%09%23FFFFFF,purple/K04441%09%23FFFFFF,red/K08049%09%23FFFFFF,green/K08837%09%23FFFFFF,red/K06645%09%23FFFFFF,red/K02537%09%23FFFFFF,red/K04368%09%23FFFFFF,red/K08043%09%23FFFFFF,green/K02649%09%23FFFFFF,purple/K13296%09%23FFF…
mmu04750	Inflammatory mediator regulation of TRP channels	Organismal Systems	Sensory system	13	14	27	124	0.310659	0.520161	ENSMUSG00000053436(Mapk14),ENSMUSG00000052889(Prkcb),ENSMUSG00000021948(Prkcd),ENSMUSG00000021936(Mapk8),ENSMUSG00000056220(Pla2g4a),ENSMUSG00000001175(Calm1),ENSMUSG00000014956(Ppp1cb),ENSMUSG00000024639(Gnaq),ENSMUSG00000053137(Mapk11),ENSMUSG00000027398(Il1b),ENSMUSG00000041417(Pik3r1),ENSMUSG00000027646(Src),ENSMUSG00000053819(Camk2d)	ENSMUSG00000030102(Itpr1),ENSMUSG00000014158(Trpv4),ENSMUSG00000031834(Pik3r2),ENSMUSG00000037759(Ptger2),ENSMUSG00000016933(Plcg1),ENSMUSG00000015224(Cyp2j9),ENSMUSG00000020623(Map2k6),ENSMUSG00000021820(Camk2g),ENSMUSG00000053004(Hrh1),ENSMUSG00000005580(Adcy9),ENSMUSG00000020654(Adcy3),ENSMUSG00000040061(Plcb2),ENSMUSG00000026228(Htr2b),ENSMUSG00000042644(Itpr3)	http://www.kegg.jp/kegg-bin/show_pathway?map04750/K04259%09%23FFFFFF,green/K04157%09%23FFFFFF,green/K06068%09%23FFFFFF,red/K04149%09%23FFFFFF,green/K01116%09%23FFFFFF,green/K05858%09%23FFFFFF,green/K04958%09%23FFFFFF,green/K08043%09%23FFFFFF,green/K04515%09%23FFFFFF,purple/K04973%09%23FFFFFF,green/K04634%09%23FFFFFF,red/K16342%09%23FFFFFF,red/K02649%09%23FFFFFF,purple/K04440%09%23FFFFFF,red/K0741…
mmu04720	Long-term potentiation	Organismal Systems	Nervous system	10	5	15	66	0.310767	0.520161	ENSMUSG00000004936(Map2k1),ENSMUSG00000052889(Prkcb),ENSMUSG00000002413(Braf),ENSMUSG00000022092(Ppp3cc),ENSMUSG00000000441(Raf1),ENSMUSG00000053819(Camk2d),ENSMUSG00000052681(Rap1b),ENSMUSG00000024639(Gnaq),ENSMUSG00000014956(Ppp1cb),ENSMUSG00000001175(Calm1)	ENSMUSG00000030102(Itpr1),ENSMUSG00000042644(Itpr3),ENSMUSG00000040061(Plcb2),ENSMUSG00000022469(Rapgef3),ENSMUSG00000021820(Camk2g)	http://www.kegg.jp/kegg-bin/show_pathway?map04720/K04348%09%23FFFFFF,red/K02183%09%23FFFFFF,red/K04368%09%23FFFFFF,red/K08014%09%23FFFFFF,green/K04515%09%23FFFFFF,purple/K04960%09%23FFFFFF,green/K04366%09%23FFFFFF,red/K19662%09%23FFFFFF,red/K04634%09%23FFFFFF,red/K04958%09%23FFFFFF,green/K07836%09%23FFFFFF,red/K05858%09%23FFFFFF,green/K04365%09%23FFFFFF,red/K06269%09%23FFFFFF,red/
mmu04540	Gap junction	Cellular Processes	Cellular community - eukaryotes	11	8	19	86	0.325867	0.541999	ENSMUSG00000024639(Gnaq),ENSMUSG00000000441(Raf1),ENSMUSG00000038668(Lpar1),ENSMUSG00000004936(Map2k1),ENSMUSG00000024620(Pdgfrb),ENSMUSG00000027646(Src),ENSMUSG00000050953(Gja1),ENSMUSG00000001473(Tubb6),ENSMUSG00000062591(Tubb4a),ENSMUSG00000020122(Egfr),ENSMUSG00000052889(Prkcb)	ENSMUSG00000030102(Itpr1),ENSMUSG00000042644(Itpr3),ENSMUSG00000040061(Plcb2),ENSMUSG00000020654(Adcy3),ENSMUSG00000026228(Htr2b),ENSMUSG00000005580(Adcy9),ENSMUSG00000028019(Pdgfc),ENSMUSG00000025856(Pdgfa)	http://www.kegg.jp/kegg-bin/show_pathway?map04540/K04366%09%23FFFFFF,red/K07372%09%23FFFFFF,red/K04361%09%23FFFFFF,red/K04359%09%23FFFFFF,green/K08043%09%23FFFFFF,green/K04157%09%23FFFFFF,green/K05450%09%23FFFFFF,green/K19662%09%23FFFFFF,red/K07375%09%23FFFFFF,red/K04960%09%23FFFFFF,green/K05704%09%23FFFFFF,red/K04368%09%23FFFFFF,red/K05858%09%23FFFFFF,green/K05089%09%23FFFFFF,red/K08049%09%23FFF…
mmu04144	Endocytosis	Cellular Processes	Transport and catabolism	32	22	54	258	0.328295	0.541999	ENSMUSG00000020122(Egfr),ENSMUSG00000092243(Gm7030),ENSMUSG00000035929(H2-Q4),ENSMUSG00000036986(Pml),ENSMUSG00000041115(Iqsec2),ENSMUSG00000019868(Vta1),ENSMUSG00000048832(Vps37c),ENSMUSG00000053835(H2-T24),ENSMUSG00000042249(Grk3),ENSMUSG00000007655(Cav1),ENSMUSG00000015733(Capza2),ENSMUSG00000090877(Hspa1b),ENSMUSG00000031304(Il2rg),ENSMUSG00000022377(Asap1),ENSMUSG00000020671(Rab10),ENSMUSG00…	ENSMUSG00000005699(Pard6a),ENSMUSG00000036580(Spg20),ENSMUSG00000074657(Kif5a),ENSMUSG00000038740(Mvb12b),ENSMUSG00000036995(Asap3),ENSMUSG00000051343(Rab11fip5),ENSMUSG00000041058(Wwp1),ENSMUSG00000056185(Snx32),ENSMUSG00000024065(Ehd3),ENSMUSG00000017132(Cyth1),ENSMUSG00000075284(Wipf1),ENSMUSG00000056214(Pard6g),ENSMUSG00000027423(Snx5),ENSMUSG00000032440(Tgfbr2),ENSMUSG00000019478(Rab4a),ENSM…	http://www.kegg.jp/kegg-bin/show_pathway?map04144/K00889%09%23FFFFFF,red/K06093%09%23FFFFFF,green/K18440%09%23FFFFFF,green/K05633%09%23FFFFFF,green/K12199%09%23FFFFFF,red/K17920%09%23FFFFFF,green/K05070%09%23FFFFFF,red/K12488%09%23FFFFFF,purple/K10054%09%23FFFFFF,red/K19366%09%23FFFFFF,green/K12483%09%23FFFFFF,red/K12473%09%23FFFFFF,red/K04388%09%23FFFFFF,green/K12478%09%23FFFFFF,red/K12476%09%23…
mmu04213	Longevity regulating pathway - multiple species	Organismal Systems	Aging	5	9	14	62	0.329009	0.541999	ENSMUSG00000006818(Sod2),ENSMUSG00000090877(Hspa1b),ENSMUSG00000041417(Pik3r1),ENSMUSG00000028800(Hdac1),ENSMUSG00000091971(Hspa1a)	ENSMUSG00000031834(Pik3r2),ENSMUSG00000048756(Foxo3),ENSMUSG00000044167(Foxo1),ENSMUSG00000028944(Prkag2),ENSMUSG00000038894(Irs2),ENSMUSG00000020654(Adcy3),ENSMUSG00000020091(Eif4ebp2),ENSMUSG00000055980(Irs1),ENSMUSG00000005580(Adcy9)	http://www.kegg.jp/kegg-bin/show_pathway?map04213/K07201%09%23FFFFFF,green/K03283%09%23FFFFFF,red/K08049%09%23FFFFFF,green/K07200%09%23FFFFFF,green/K06067%09%23FFFFFF,red/K09408%09%23FFFFFF,green/K07187%09%23FFFFFF,green/K04564%09%23FFFFFF,red/K08043%09%23FFFFFF,green/K16172%09%23FFFFFF,green/K18644%09%23FFFFFF,green/K02649%09%23FFFFFF,purple/
mmu00600	Sphingolipid metabolism	Metabolism	Lipid metabolism	4	6	10	43	0.333118	0.545895	ENSMUSG00000050931(Sgms2),ENSMUSG00000028381(Ugcg),ENSMUSG00000021759(Plpp1),ENSMUSG00000040451(Sgms1)	ENSMUSG00000009905(Kdsr),ENSMUSG00000035891(Cerk),ENSMUSG00000019822(Smpd2),ENSMUSG00000037049(Smpd1),ENSMUSG00000021054(Sgpp1),ENSMUSG00000031266(Gla)	http://www.kegg.jp/kegg-bin/show_pathway?map00600/K04714%09%23FFFFFF,red/K12350%09%23FFFFFF,green/K04708%09%23FFFFFF,green/K04716%09%23FFFFFF,green/K01189%09%23FFFFFF,green/K12351%09%23FFFFFF,green/K04715%09%23FFFFFF,green/K00720%09%23FFFFFF,red/K01080%09%23FFFFFF,red/
mmu00730	Thiamine metabolism	Metabolism	Metabolism of cofactors and vitamins	2	2	4	15	0.339663	0.553721	ENSMUSG00000028527(Ak4),ENSMUSG00000028792(Ak2)	ENSMUSG00000031851(Ntpcr),ENSMUSG00000045691(Thtpa)	http://www.kegg.jp/kegg-bin/show_pathway?map00730/K05307%09%23FFFFFF,green/K00939%09%23FFFFFF,red/K06928%09%23FFFFFF,green/
mmu04020	Calcium signaling pathway	Environmental Information Processing	Signal transduction	21	18	39	185	0.34233	0.555177	ENSMUSG00000052821(Cysltr1),ENSMUSG00000039156(Stim2),ENSMUSG00000022122(Ednrb),ENSMUSG00000026463(Atp2b4),ENSMUSG00000029084(Cd38),ENSMUSG00000008892(Vdac3),ENSMUSG00000020826(Nos2),ENSMUSG00000053819(Camk2d),ENSMUSG00000001175(Calm1),ENSMUSG00000024639(Gnaq),ENSMUSG00000021868(Ppif),ENSMUSG00000052889(Prkcb),ENSMUSG00000020866(Cacna1g),ENSMUSG00000018500(Adora2b),ENSMUSG00000039747(Orai2),ENSMU…	ENSMUSG00000015968(Cacna1d),ENSMUSG00000030272(Camk1),ENSMUSG00000040061(Plcb2),ENSMUSG00000031295(Phka2),ENSMUSG00000020654(Adcy3),ENSMUSG00000026228(Htr2b),ENSMUSG00000045382(Cxcr4),ENSMUSG00000042644(Itpr3),ENSMUSG00000021820(Camk2g),ENSMUSG00000054640(Slc8a1),ENSMUSG00000053004(Hrh1),ENSMUSG00000020937(Plcd3),ENSMUSG00000005580(Adcy9),ENSMUSG00000029468(P2rx7),ENSMUSG00000016933(Plcg1),ENSMUS…	http://www.kegg.jp/kegg-bin/show_pathway?map04020/K19662%09%23FFFFFF,red/K16057%09%23FFFFFF,red/K04515%09%23FFFFFF,purple/K04323%09%23FFFFFF,red/K04198%09%23FFFFFF,red/K05220%09%23FFFFFF,green/K04851%09%23FFFFFF,green/K04157%09%23FFFFFF,green/K08043%09%23FFFFFF,green/K04266%09%23FFFFFF,red/K04958%09%23FFFFFF,green/K02183%09%23FFFFFF,red/K04322%09%23FFFFFF,red/K04189%09%23FFFFFF,green/K04348%09%23…
mmu04520	Adherens junction	Cellular Processes	Cellular community - eukaryotes	12	3	15	68	0.355946	0.572863	ENSMUSG00000062825(Actg1),ENSMUSG00000025314(Ptprj),ENSMUSG00000004266(Ptpn6),ENSMUSG00000020122(Egfr),ENSMUSG00000062300(Nectin2),ENSMUSG00000027646(Src),ENSMUSG00000021823(Vcl),ENSMUSG00000034101(Ctnnd1),ENSMUSG00000029580(Actb),ENSMUSG00000009376(Met),ENSMUSG00000033220(Rac2),ENSMUSG00000027540(Ptpn1)	ENSMUSG00000032440(Tgfbr2),ENSMUSG00000025372(Baiap2),ENSMUSG00000031565(Fgfr1)	http://www.kegg.jp/kegg-bin/show_pathway?map04520/K05692%09%23FFFFFF,red/K05099%09%23FFFFFF,red/K07860%09%23FFFFFF,red/K05698%09%23FFFFFF,red/K05704%09%23FFFFFF,red/K05697%09%23FFFFFF,red/K05627%09%23FFFFFF,green/K05696%09%23FFFFFF,red/K05700%09%23FFFFFF,red/K04361%09%23FFFFFF,red/K04362%09%23FFFFFF,green/K04388%09%23FFFFFF,green/K05690%09%23FFFFFF,red/K06531%09%23FFFFFF,red/
mmu04024	cAMP signaling pathway	Environmental Information Processing	Signal transduction	25	16	41	196	0.357365	0.572863	ENSMUSG00000053819(Camk2d),ENSMUSG00000000441(Raf1),ENSMUSG00000021025(Nfkbia),ENSMUSG00000028163(Nfkb1),ENSMUSG00000045502(Hcar2),ENSMUSG00000026463(Atp2b4),ENSMUSG00000055723(Rras2),ENSMUSG00000041417(Pik3r1),ENSMUSG00000038387(Rras),ENSMUSG00000053007(Creb5),ENSMUSG00000052681(Rap1b),ENSMUSG00000014956(Ppp1cb),ENSMUSG00000028525(Pde4b),ENSMUSG00000001175(Calm1),ENSMUSG00000004936(Map2k1),ENSMU…	ENSMUSG00000020654(Adcy3),ENSMUSG00000024462(Gabbr1),ENSMUSG00000015968(Cacna1d),ENSMUSG00000022469(Rapgef3),ENSMUSG00000029098(Acox3),ENSMUSG00000005580(Adcy9),ENSMUSG00000038648(Creb3l2),ENSMUSG00000052684(Jun),ENSMUSG00000021820(Camk2g),ENSMUSG00000030671(Pde3b),ENSMUSG00000031834(Pik3r2),ENSMUSG00000037759(Ptger2),ENSMUSG00000027931(Npr1),ENSMUSG00000021699(Pde4d),ENSMUSG00000064177(Ghrl),ENS…	http://www.kegg.jp/kegg-bin/show_pathway?map04024/K08014%09%23FFFFFF,green/K04366%09%23FFFFFF,red/K04448%09%23FFFFFF,green/K09047%09%23FFFFFF,red/K04851%09%23FFFFFF,green/K02183%09%23FFFFFF,red/K07829%09%23FFFFFF,red/K08043%09%23FFFFFF,green/K18438%09%23FFFFFF,red/K06269%09%23FFFFFF,red/K13296%09%23FFFFFF,green/K07860%09%23FFFFFF,red/K04515%09%23FFFFFF,purple/K04365%09%23FFFFFF,red/K04734%09%23FF…
mmu04142	Lysosome	Cellular Processes	Transport and catabolism	8	18	26	122	0.358726	0.572863	ENSMUSG00000023030(Slc11a2),ENSMUSG00000001348(Acp5),ENSMUSG00000030560(Ctsc),ENSMUSG00000022125(Cln5),ENSMUSG00000002103(Acp2),ENSMUSG00000024910(Ctsw),ENSMUSG00000007458(M6pr),ENSMUSG00000015474(Ppt2)	ENSMUSG00000005043(Sgsh),ENSMUSG00000028238(Atp6v0d2),ENSMUSG00000031266(Gla),ENSMUSG00000031903(Pla2g15),ENSMUSG00000022257(Laptm4b),ENSMUSG00000020604(Arsg),ENSMUSG00000019518(Ap4m1),ENSMUSG00000030872(Gga2),ENSMUSG00000029426(Scarb2),ENSMUSG00000009090(Ap1b1),ENSMUSG00000005949(Ctns),ENSMUSG00000049624(Slc17a5),ENSMUSG00000028164(Manba),ENSMUSG00000024413(Npc1),ENSMUSG00000019302(Atp6v0a1),ENS…	http://www.kegg.jp/kegg-bin/show_pathway?map04142/K01074%09%23FFFFFF,red/K12404%09%23FFFFFF,green/K14410%09%23FFFFFF,red/K12350%09%23FFFFFF,green/K12402%09%23FFFFFF,green/K02146%09%23FFFFFF,green/K01565%09%23FFFFFF,green/K12385%09%23FFFFFF,green/K01192%09%23FFFFFF,green/K10089%09%23FFFFFF,red/K12384%09%23FFFFFF,green/K12390%09%23FFFFFF,red/K12392%09%23FFFFFF,green/K02154%09%23FFFFFF,green/K12381%…
mmu04979	Cholesterol metabolism	Organismal Systems	Digestive system	4	7	11	49	0.366345	0.582062	ENSMUSG00000053846(Lipg),ENSMUSG00000008892(Vdac3),ENSMUSG00000032193(Ldlr),ENSMUSG00000035237(Lcat)	ENSMUSG00000037295(Ldlrap1),ENSMUSG00000026600(Soat1),ENSMUSG00000040249(Lrp1),ENSMUSG00000027698(Nceh1),ENSMUSG00000002289(Angptl4),ENSMUSG00000026170(Cyp27a1),ENSMUSG00000024413(Npc1)	http://www.kegg.jp/kegg-bin/show_pathway?map04979/K00488%09%23FFFFFF,green/K22284%09%23FFFFFF,red/K00637%09%23FFFFFF,green/K00650%09%23FFFFFF,red/K12473%09%23FFFFFF,red/K14349%09%23FFFFFF,green/K12474%09%23FFFFFF,green/K04550%09%23FFFFFF,green/K12385%09%23FFFFFF,green/K08767%09%23FFFFFF,green/K15041%09%23FFFFFF,red/
mmu04915	Estrogen signaling pathway	Organismal Systems	Endocrine system	14	14	28	133	0.377745	0.597143	ENSMUSG00000004936(Map2k1),ENSMUSG00000090877(Hspa1b),ENSMUSG00000021948(Prkcd),ENSMUSG00000024222(Fkbp5),ENSMUSG00000020122(Egfr),ENSMUSG00000000441(Raf1),ENSMUSG00000017737(Mmp9),ENSMUSG00000027646(Src),ENSMUSG00000041417(Pik3r1),ENSMUSG00000024639(Gnaq),ENSMUSG00000053007(Creb5),ENSMUSG00000091971(Hspa1a),ENSMUSG00000021270(Hsp90aa1),ENSMUSG00000001175(Calm1)	ENSMUSG00000031834(Pik3r2),ENSMUSG00000030102(Itpr1),ENSMUSG00000020312(Shc2),ENSMUSG00000020647(Ncoa1),ENSMUSG00000021250(Fos),ENSMUSG00000042644(Itpr3),ENSMUSG00000040061(Plcb2),ENSMUSG00000020654(Adcy3),ENSMUSG00000024462(Gabbr1),ENSMUSG00000035109(Shc4),ENSMUSG00000005580(Adcy9),ENSMUSG00000038648(Creb3l2),ENSMUSG00000019768(Esr1),ENSMUSG00000052684(Jun)	http://www.kegg.jp/kegg-bin/show_pathway?map04915/K04960%09%23FFFFFF,green/K04634%09%23FFFFFF,red/K02183%09%23FFFFFF,red/K17447%09%23FFFFFF,green/K05858%09%23FFFFFF,green/K04368%09%23FFFFFF,red/K04379%09%23FFFFFF,green/K03283%09%23FFFFFF,red/K04615%09%23FFFFFF,green/K09101%09%23FFFFFF,green/K09047%09%23FFFFFF,red/K08043%09%23FFFFFF,green/K04361%09%23FFFFFF,red/K04958%09%23FFFFFF,green/K06068%09%2…
mmu00620	Pyruvate metabolism	Metabolism	Carbohydrate metabolism	4	5	9	40	0.386617	0.608096	ENSMUSG00000020664(Dld),ENSMUSG00000032418(Me1),ENSMUSG00000062480(Acat3),ENSMUSG00000024892(Pcx)	ENSMUSG00000040618(Pck2),ENSMUSG00000027452(Acss1),ENSMUSG00000026687(Aldh9a1),ENSMUSG00000035637(Grhpr),ENSMUSG00000024158(Hagh)	http://www.kegg.jp/kegg-bin/show_pathway?map00620/K01596%09%23FFFFFF,green/K01958%09%23FFFFFF,red/K00626%09%23FFFFFF,red/K01069%09%23FFFFFF,green/K00049%09%23FFFFFF,green/K00029%09%23FFFFFF,red/K00382%09%23FFFFFF,red/K00149%09%23FFFFFF,green/K01895%09%23FFFFFF,green/
mmu00603	Glycosphingolipid biosynthesis - globo and isoglobo series	Metabolism	Glycan biosynthesis and metabolism	2	2	4	16	0.388878	0.608594	ENSMUSG00000013846(St3gal1),ENSMUSG00000026829(Gbgt1)	ENSMUSG00000031266(Gla),ENSMUSG00000074892(B3galt5)	http://www.kegg.jp/kegg-bin/show_pathway?map00603/K03877%09%23FFFFFF,green/K00780%09%23FFFFFF,red/K00722%09%23FFFFFF,red/K01189%09%23FFFFFF,green/
mmu00520	Amino sugar and nucleotide sugar metabolism	Metabolism	Carbohydrate metabolism	4	7	11	50	0.393739	0.613136	ENSMUSG00000026670(Uap1),ENSMUSG00000070284(Gmppb),ENSMUSG00000048065(Cyb5r2),ENSMUSG00000000628(Hk2)	ENSMUSG00000033703(Fcsk),ENSMUSG00000028621(Cyb5rl),ENSMUSG00000030282(Cmas),ENSMUSG00000052102(Gnpda1),ENSMUSG00000036820(Amdhd2),ENSMUSG00000022474(Pmm1),ENSMUSG00000028479(Gne)	http://www.kegg.jp/kegg-bin/show_pathway?map00520/K01443%09%23FFFFFF,green/K00326%09%23FFFFFF,purple/K17497%09%23FFFFFF,green/K05305%09%23FFFFFF,green/K12409%09%23FFFFFF,green/K00972%09%23FFFFFF,red/K21749%09%23FFFFFF,green/K02564%09%23FFFFFF,green/K00966%09%23FFFFFF,red/K00844%09%23FFFFFF,red/
mmu04730	Long-term depression	Organismal Systems	Nervous system	9	4	13	60	0.39865	0.615392	ENSMUSG00000000441(Raf1),ENSMUSG00000009630(Ppp2cb),ENSMUSG00000056220(Pla2g4a),ENSMUSG00000020349(Ppp2ca),ENSMUSG00000024639(Gnaq),ENSMUSG00000052889(Prkcb),ENSMUSG00000004936(Map2k1),ENSMUSG00000042228(Lyn),ENSMUSG00000002413(Braf)	ENSMUSG00000040061(Plcb2),ENSMUSG00000042644(Itpr3),ENSMUSG00000030102(Itpr1),ENSMUSG00000000149(Gna12)	http://www.kegg.jp/kegg-bin/show_pathway?map04730/K04365%09%23FFFFFF,red/K04960%09%23FFFFFF,green/K04958%09%23FFFFFF,green/K16342%09%23FFFFFF,red/K04346%09%23FFFFFF,green/K05858%09%23FFFFFF,green/K04366%09%23FFFFFF,red/K05854%09%23FFFFFF,red/K04382%09%23FFFFFF,red/K04634%09%23FFFFFF,red/K04368%09%23FFFFFF,red/K19662%09%23FFFFFF,red/
mmu00531	Glycosaminoglycan degradation	Metabolism	Glycan biosynthesis and metabolism	0	5	5	21	0.39912	0.615392	-	ENSMUSG00000005043(Sgsh),ENSMUSG00000010047(Hyal2),ENSMUSG00000001751(Naglu),ENSMUSG00000010051(Hyal1),ENSMUSG00000035273(Hpse)	http://www.kegg.jp/kegg-bin/show_pathway?map00531/K07964%09%23FFFFFF,green/K01565%09%23FFFFFF,green/K01197%09%23FFFFFF,green/K01205%09%23FFFFFF,green/
mmu00790	Folate biosynthesis	Metabolism	Metabolism of cofactors and vitamins	3	3	6	26	0.405972	0.619849	ENSMUSG00000047454(Gphn),ENSMUSG00000037580(Gch1),ENSMUSG00000064120(Mocs1)	ENSMUSG00000021707(Dhfr),ENSMUSG00000039616(Mocos),ENSMUSG00000051483(Cbr1)	http://www.kegg.jp/kegg-bin/show_pathway?map00790/K00287%09%23FFFFFF,green/K15376%09%23FFFFFF,red/K20967%09%23FFFFFF,red/K15631%09%23FFFFFF,green/K00079%09%23FFFFFF,green/K01495%09%23FFFFFF,red/
mmu00340	Histidine metabolism	Metabolism	Amino acid metabolism	1	5	6	26	0.405972	0.619849	ENSMUSG00000027360(Hdc)	ENSMUSG00000020017(Hal),ENSMUSG00000026687(Aldh9a1),ENSMUSG00000015890(Amdhd1),ENSMUSG00000020774(Aspa),ENSMUSG00000026986(Hnmt)	http://www.kegg.jp/kegg-bin/show_pathway?map00340/K01437%09%23FFFFFF,green/K00149%09%23FFFFFF,green/K01468%09%23FFFFFF,green/K01590%09%23FFFFFF,red/K00546%09%23FFFFFF,green/K01745%09%23FFFFFF,green/
mmu04925	Aldosterone synthesis and secretion	Organismal Systems	Endocrine system	9	12	21	100	0.40826	0.620317	ENSMUSG00000023034(Nr4a1),ENSMUSG00000001175(Calm1),ENSMUSG00000032193(Ldlr),ENSMUSG00000053007(Creb5),ENSMUSG00000024639(Gnaq),ENSMUSG00000052889(Prkcb),ENSMUSG00000026463(Atp2b4),ENSMUSG00000020866(Cacna1g),ENSMUSG00000053819(Camk2d)	ENSMUSG00000021820(Camk2g),ENSMUSG00000038648(Creb3l2),ENSMUSG00000039206(Daglb),ENSMUSG00000005580(Adcy9),ENSMUSG00000030102(Itpr1),ENSMUSG00000015968(Cacna1d),ENSMUSG00000035735(Dagla),ENSMUSG00000030272(Camk1),ENSMUSG00000027931(Npr1),ENSMUSG00000020654(Adcy3),ENSMUSG00000040061(Plcb2),ENSMUSG00000042644(Itpr3)	http://www.kegg.jp/kegg-bin/show_pathway?map04925/K05850%09%23FFFFFF,red/K04634%09%23FFFFFF,red/K09048%09%23FFFFFF,green/K12323%09%23FFFFFF,green/K13806%09%23FFFFFF,green/K04465%09%23FFFFFF,red/K19662%09%23FFFFFF,red/K02183%09%23FFFFFF,red/K08794%09%23FFFFFF,green/K12473%09%23FFFFFF,red/K04851%09%23FFFFFF,green/K04854%09%23FFFFFF,red/K04515%09%23FFFFFF,purple/K04958%09%23FFFFFF,green/K09047%09%23…
mmu00051	Fructose and mannose metabolism	Metabolism	Carbohydrate metabolism	4	4	8	36	0.414507	0.626766	ENSMUSG00000020277(Pfkl),ENSMUSG00000000628(Hk2),ENSMUSG00000021196(Pfkp),ENSMUSG00000070284(Gmppb)	ENSMUSG00000026409(Pfkfb2),ENSMUSG00000033703(Fcsk),ENSMUSG00000022474(Pmm1),ENSMUSG00000027227(Sord)	http://www.kegg.jp/kegg-bin/show_pathway?map00051/K19029%09%23FFFFFF,green/K00844%09%23FFFFFF,red/K05305%09%23FFFFFF,green/K00850%09%23FFFFFF,red/K17497%09%23FFFFFF,green/K00966%09%23FFFFFF,red/K00008%09%23FFFFFF,green/
mmu00565	Ether lipid metabolism	Metabolism	Lipid metabolism	7	3	10	46	0.419499	0.631265	ENSMUSG00000021759(Plpp1),ENSMUSG00000040774(Cept1),ENSMUSG00000045282(Tmem86b),ENSMUSG00000056220(Pla2g4a),ENSMUSG00000033192(Lpcat2),ENSMUSG00000060675(Plaat3),ENSMUSG00000061666(Gdpd1)	ENSMUSG00000052160(Pld4),ENSMUSG00000005447(Pafah1b3),ENSMUSG00000028751(Pla2g2e)	http://www.kegg.jp/kegg-bin/show_pathway?map00565/K13510%09%23FFFFFF,red/K16860%09%23FFFFFF,green/K16342%09%23FFFFFF,red/K01080%09%23FFFFFF,red/K13644%09%23FFFFFF,red/K22387%09%23FFFFFF,red/K16795%09%23FFFFFF,green/K16817%09%23FFFFFF,red/K01047%09%23FFFFFF,green/K18575%09%23FFFFFF,red/
mmu00562	Inositol phosphate metabolism	Metabolism	Carbohydrate metabolism	4	11	15	71	0.425489	0.637216	ENSMUSG00000028894(Inpp5b),ENSMUSG00000020573(Pik3cg),ENSMUSG00000028126(Pip5k1a),ENSMUSG00000030269(Mtmr14)	ENSMUSG00000024525(Impa2),ENSMUSG00000037940(Inpp4b),ENSMUSG00000040061(Plcb2),ENSMUSG00000023805(Synj2),ENSMUSG00000042105(Inpp5f),ENSMUSG00000038417(Fig4),ENSMUSG00000020937(Plcd3),ENSMUSG00000026113(Inpp4a),ENSMUSG00000016933(Plcg1),ENSMUSG00000026102(Inpp1),ENSMUSG00000026288(Inpp5d)	http://www.kegg.jp/kegg-bin/show_pathway?map00562/K22913%09%23FFFFFF,green/K01116%09%23FFFFFF,green/K05857%09%23FFFFFF,green/K03084%09%23FFFFFF,green/K21289%09%23FFFFFF,red/K01099%09%23FFFFFF,red/K01109%09%23FFFFFF,green/K20279%09%23FFFFFF,green/K01107%09%23FFFFFF,green/K21798%09%23FFFFFF,green/K18086%09%23FFFFFF,red/K05858%09%23FFFFFF,green/K00889%09%23FFFFFF,red/K01092%09%23FFFFFF,green/
mmu04713	Circadian entrainment	Organismal Systems	Environmental adaptation	7	13	20	97	0.447668	0.665205	ENSMUSG00000052889(Prkcb),ENSMUSG00000020866(Cacna1g),ENSMUSG00000036402(Gng12),ENSMUSG00000001175(Calm1),ENSMUSG00000029064(Gnb1),ENSMUSG00000024639(Gnaq),ENSMUSG00000053819(Camk2d)	ENSMUSG00000021250(Fos),ENSMUSG00000032766(Gng11),ENSMUSG00000030102(Itpr1),ENSMUSG00000032192(Gnb5),ENSMUSG00000043004(Gng2),ENSMUSG00000021820(Camk2g),ENSMUSG00000005580(Adcy9),ENSMUSG00000048240(Gng7),ENSMUSG00000015968(Cacna1d),ENSMUSG00000020654(Adcy3),ENSMUSG00000040061(Plcb2),ENSMUSG00000028957(Per3),ENSMUSG00000042644(Itpr3)	http://www.kegg.jp/kegg-bin/show_pathway?map04713/K08043%09%23FFFFFF,green/K08049%09%23FFFFFF,green/K04958%09%23FFFFFF,green/K04851%09%23FFFFFF,green/K04379%09%23FFFFFF,green/K04539%09%23FFFFFF,green/K19662%09%23FFFFFF,red/K04546%09%23FFFFFF,green/K21945%09%23FFFFFF,green/K07826%09%23FFFFFF,green/K05858%09%23FFFFFF,green/K04634%09%23FFFFFF,red/K04960%09%23FFFFFF,green/K04515%09%23FFFFFF,purple/K0…
mmu00510	N-Glycan biosynthesis	Metabolism	Glycan biosynthesis and metabolism	3	7	10	47	0.448429	0.665205	ENSMUSG00000026110(Mgat4a),ENSMUSG00000024085(Man2a1),ENSMUSG00000036620(Mgat4b)	ENSMUSG00000022885(St6gal1),ENSMUSG00000038886(Man2a2),ENSMUSG00000075470(Alg10b),ENSMUSG00000039740(Alg2),ENSMUSG00000036155(Mgat5),ENSMUSG00000037306(Man1c1),ENSMUSG00000028413(B4galt1)	http://www.kegg.jp/kegg-bin/show_pathway?map00510/K07966%09%23FFFFFF,green/K03850%09%23FFFFFF,green/K03843%09%23FFFFFF,green/K01231%09%23FFFFFF,purple/K00778%09%23FFFFFF,green/K00738%09%23FFFFFF,red/K01230%09%23FFFFFF,green/K00744%09%23FFFFFF,green/
mmu05020	Prion diseases	Human Diseases	Neurodegenerative diseases	7	0	7	33	0.480803	0.700693	ENSMUSG00000026923(Notch1),ENSMUSG00000004936(Map2k1),ENSMUSG00000025746(Il6),ENSMUSG00000027399(Il1a),ENSMUSG00000035042(Ccl5),ENSMUSG00000024966(Stip1),ENSMUSG00000027398(Il1b)	-	http://www.kegg.jp/kegg-bin/show_pathway?map05020/K05405%09%23FFFFFF,red/K09553%09%23FFFFFF,red/K04519%09%23FFFFFF,red/K12499%09%23FFFFFF,red/K02599%09%23FFFFFF,red/K04383%09%23FFFFFF,red/K04368%09%23FFFFFF,red/
mmu00780	Biotin metabolism	Metabolism	Metabolism of cofactors and vitamins	0	1	1	3	0.48177	0.700693	-	ENSMUSG00000040820(Hlcs)	http://www.kegg.jp/kegg-bin/show_pathway?map00780/K01942%09%23FFFFFF,green/
mmu00512	Mucin type O-glycan biosynthesis	Metabolism	Glycan biosynthesis and metabolism	3	3	6	28	0.48214	0.700693	ENSMUSG00000017929(B4galt5),ENSMUSG00000026994(Galnt3),ENSMUSG00000013846(St3gal1)	ENSMUSG00000039774(Galnt12),ENSMUSG00000042460(C1galt1),ENSMUSG00000038843(Gcnt1)	http://www.kegg.jp/kegg-bin/show_pathway?map00512/K00731%09%23FFFFFF,green/K00727%09%23FFFFFF,green/K00780%09%23FFFFFF,red/K00710%09%23FFFFFF,purple/K09905%09%23FFFFFF,red/
mmu00515	Mannose type O-glycan biosynthesis	Metabolism	Glycan biosynthesis and metabolism	1	4	5	23	0.483545	0.700693	ENSMUSG00000028538(St3gal3)	ENSMUSG00000026080(Chst10),ENSMUSG00000037251(Pomk),ENSMUSG00000066235(Pomgnt2),ENSMUSG00000028413(B4galt1)	http://www.kegg.jp/kegg-bin/show_pathway?map00515/K09674%09%23FFFFFF,green/K07966%09%23FFFFFF,green/K18207%09%23FFFFFF,green/K00781%09%23FFFFFF,red/K17547%09%23FFFFFF,green/
mmu00900	Terpenoid backbone biosynthesis	Metabolism	Metabolism of terpenoids and polyketides	5	0	5	23	0.483545	0.700693	ENSMUSG00000062480(Acat3),ENSMUSG00000093930(Hmgcs1),ENSMUSG00000026784(Pdss1),ENSMUSG00000021670(Hmgcr),ENSMUSG00000058258(Idi1)	-	http://www.kegg.jp/kegg-bin/show_pathway?map00900/K12504%09%23FFFFFF,red/K00626%09%23FFFFFF,red/K00021%09%23FFFFFF,red/K01641%09%23FFFFFF,red/K01823%09%23FFFFFF,red/
mmu00380	Tryptophan metabolism	Metabolism	Amino acid metabolism	4	6	10	49	0.50559	0.725403	ENSMUSG00000062480(Acat3),ENSMUSG00000020804(Aanat),ENSMUSG00000063558(Aox1),ENSMUSG00000031549(Ido2)	ENSMUSG00000027984(Hadh),ENSMUSG00000039648(Kyat1),ENSMUSG00000022853(Ehhadh),ENSMUSG00000025465(Echs1),ENSMUSG00000003809(Gcdh),ENSMUSG00000026687(Aldh9a1)	http://www.kegg.jp/kegg-bin/show_pathway?map00380/K00669%09%23FFFFFF,red/K00252%09%23FFFFFF,green/K00816%09%23FFFFFF,green/K00022%09%23FFFFFF,green/K00626%09%23FFFFFF,red/K07514%09%23FFFFFF,green/K00149%09%23FFFFFF,green/K07511%09%23FFFFFF,green/K00157%09%23FFFFFF,red/K00463%09%23FFFFFF,red/
mmu04340	Hedgehog signaling pathway	Environmental Information Processing	Signal transduction	5	5	10	49	0.50559	0.725403	ENSMUSG00000073563(Csnk1g3),ENSMUSG00000042249(Grk3),ENSMUSG00000022687(Boc),ENSMUSG00000000184(Ccnd2),ENSMUSG00000020271(Fbxw11)	ENSMUSG00000001761(Smo),ENSMUSG00000050382(Kif7),ENSMUSG00000070348(Ccnd1),ENSMUSG00000018395(Kif3a),ENSMUSG00000022433(Csnk1e)	http://www.kegg.jp/kegg-bin/show_pathway?map04340/K03362%09%23FFFFFF,red/K00910%09%23FFFFFF,red/K10151%09%23FFFFFF,red/K20020%09%23FFFFFF,red/K08958%09%23FFFFFF,red/K06226%09%23FFFFFF,green/K04503%09%23FFFFFF,green/K10394%09%23FFFFFF,green/K18806%09%23FFFFFF,green/K08960%09%23FFFFFF,green/
mmu04916	Melanogenesis	Organismal Systems	Endocrine system	13	7	20	100	0.50755	0.725403	ENSMUSG00000035158(Mitf),ENSMUSG00000004936(Map2k1),ENSMUSG00000052889(Prkcb),ENSMUSG00000024639(Gnaq),ENSMUSG00000045005(Fzd5),ENSMUSG00000044674(Fzd1),ENSMUSG00000001175(Calm1),ENSMUSG00000015957(Wnt11),ENSMUSG00000053819(Camk2d),ENSMUSG00000000441(Raf1),ENSMUSG00000033227(Wnt6),ENSMUSG00000022122(Ednrb),ENSMUSG00000021367(Edn1)	ENSMUSG00000019966(Kitl),ENSMUSG00000020888(Dvl2),ENSMUSG00000005580(Adcy9),ENSMUSG00000021820(Camk2g),ENSMUSG00000038648(Creb3l2),ENSMUSG00000020654(Adcy3),ENSMUSG00000040061(Plcb2)	http://www.kegg.jp/kegg-bin/show_pathway?map04916/K02183%09%23FFFFFF,red/K00445%09%23FFFFFF,red/K01384%09%23FFFFFF,red/K16366%09%23FFFFFF,red/K04515%09%23FFFFFF,purple/K04366%09%23FFFFFF,red/K02432%09%23FFFFFF,red/K04634%09%23FFFFFF,red/K09048%09%23FFFFFF,green/K02375%09%23FFFFFF,red/K05461%09%23FFFFFF,green/K02353%09%23FFFFFF,green/K08043%09%23FFFFFF,green/K04198%09%23FFFFFF,red/K09455%09%23FFFF…
mmu04270	Vascular smooth muscle contraction	Organismal Systems	Circulatory system	17	10	27	137	0.530642	0.754958	ENSMUSG00000000441(Raf1),ENSMUSG00000021367(Edn1),ENSMUSG00000043017(Ptgir),ENSMUSG00000024639(Gnaq),ENSMUSG00000014956(Ppp1cb),ENSMUSG00000001175(Calm1),ENSMUSG00000056220(Pla2g4a),ENSMUSG00000004936(Map2k1),ENSMUSG00000030790(Adm),ENSMUSG00000018500(Adora2b),ENSMUSG00000021948(Prkcd),ENSMUSG00000052889(Prkcb),ENSMUSG00000020580(Rock2),ENSMUSG00000002413(Braf),ENSMUSG00000024290(Rock1),ENSMUSG00…	ENSMUSG00000042644(Itpr3),ENSMUSG00000040061(Plcb2),ENSMUSG00000020654(Adcy3),ENSMUSG00000015968(Cacna1d),ENSMUSG00000005580(Adcy9),ENSMUSG00000027931(Npr1),ENSMUSG00000028751(Pla2g2e),ENSMUSG00000030102(Itpr1),ENSMUSG00000045875(Adra1a),ENSMUSG00000000149(Gna12)	http://www.kegg.jp/kegg-bin/show_pathway?map04270/K04958%09%23FFFFFF,green/K06269%09%23FFFFFF,red/K04266%09%23FFFFFF,red/K05858%09%23FFFFFF,green/K16366%09%23FFFFFF,red/K12333%09%23FFFFFF,red/K04368%09%23FFFFFF,red/K19662%09%23FFFFFF,red/K08049%09%23FFFFFF,green/K04577%09%23FFFFFF,red/K06068%09%23FFFFFF,red/K04263%09%23FFFFFF,red/K12323%09%23FFFFFF,green/K04514%09%23FFFFFF,red/K04346%09%23FFFFFF,…
mmu00061	Fatty acid biosynthesis	Metabolism	Lipid metabolism	3	0	3	14	0.539771	0.764473	ENSMUSG00000024981(Acsl5),ENSMUSG00000031278(Acsl4),ENSMUSG00000018796(Acsl1)	-	http://www.kegg.jp/kegg-bin/show_pathway?map00061/K01897%09%23FFFFFF,red/
mmu04927	Cortisol synthesis and secretion	Organismal Systems	Endocrine system	5	9	14	71	0.544011	0.767007	ENSMUSG00000020866(Cacna1g),ENSMUSG00000023034(Nr4a1),ENSMUSG00000032193(Ldlr),ENSMUSG00000024639(Gnaq),ENSMUSG00000053007(Creb5)	ENSMUSG00000015968(Cacna1d),ENSMUSG00000020654(Adcy3),ENSMUSG00000040061(Plcb2),ENSMUSG00000042644(Itpr3),ENSMUSG00000038648(Creb3l2),ENSMUSG00000027698(Nceh1),ENSMUSG00000005580(Adcy9),ENSMUSG00000030102(Itpr1),ENSMUSG00000039956(Mrap)	http://www.kegg.jp/kegg-bin/show_pathway?map04927/K12473%09%23FFFFFF,red/K04960%09%23FFFFFF,green/K09048%09%23FFFFFF,green/K04958%09%23FFFFFF,green/K08049%09%23FFFFFF,green/K04851%09%23FFFFFF,green/K14349%09%23FFFFFF,green/K04854%09%23FFFFFF,red/K09047%09%23FFFFFF,red/K04634%09%23FFFFFF,red/K04465%09%23FFFFFF,red/K08043%09%23FFFFFF,green/K05858%09%23FFFFFF,green/K22398%09%23FFFFFF,green/
mmu00480	Glutathione metabolism	Metabolism	Metabolism of other amino acids	6	7	13	66	0.547633	0.768651	ENSMUSG00000001663(Gstt1),ENSMUSG00000020309(Chac2),ENSMUSG00000028961(Pgd),ENSMUSG00000028124(Gclm),ENSMUSG00000027610(Gss),ENSMUSG00000031584(Gsr)	ENSMUSG00000020649(Rrm2),ENSMUSG00000029919(Hpgds),ENSMUSG00000001665(Gstt3),ENSMUSG00000027313(Chac1),ENSMUSG00000033318(Gstt2),ENSMUSG00000022562(Oplah),ENSMUSG00000029864(Gstk1)	http://www.kegg.jp/kegg-bin/show_pathway?map00480/K07232%09%23FFFFFF,purple/K04097%09%23FFFFFF,green/K10808%09%23FFFFFF,green/K01469%09%23FFFFFF,green/K11205%09%23FFFFFF,red/K00033%09%23FFFFFF,red/K00799%09%23FFFFFF,purple/K21456%09%23FFFFFF,red/K13299%09%23FFFFFF,green/K00383%09%23FFFFFF,red/
mmu00563	Glycosylphosphatidylinositol (GPI)-anchor biosynthesis	Metabolism	Glycan biosynthesis and metabolism	2	3	5	25	0.563417	0.787275	ENSMUSG00000045140(Pigw),ENSMUSG00000043257(Pigv)	ENSMUSG00000022940(Pigp),ENSMUSG00000079469(Pigb),ENSMUSG00000010607(Pigyl)	http://www.kegg.jp/kegg-bin/show_pathway?map00563/K05283%09%23FFFFFF,red/K03861%09%23FFFFFF,green/K07542%09%23FFFFFF,red/K05286%09%23FFFFFF,green/K11001%09%23FFFFFF,green/
mmu00860	Porphyrin and chlorophyll metabolism	Metabolism	Metabolism of cofactors and vitamins	5	3	8	41	0.572965	0.797059	ENSMUSG00000090145(Ugt1a6b),ENSMUSG00000040466(Blvrb),ENSMUSG00000003617(Cp),ENSMUSG00000005413(Hmox1),ENSMUSG00000032786(Alas1)	ENSMUSG00000028684(Urod),ENSMUSG00000062729(Ppox),ENSMUSG00000032126(Hmbs)	http://www.kegg.jp/kegg-bin/show_pathway?map00860/K00510%09%23FFFFFF,red/K01599%09%23FFFFFF,green/K00699%09%23FFFFFF,red/K00643%09%23FFFFFF,red/K00231%09%23FFFFFF,green/K05901%09%23FFFFFF,red/K13624%09%23FFFFFF,red/K01749%09%23FFFFFF,green/
mmu00561	Glycerolipid metabolism	Metabolism	Lipid metabolism	5	7	12	62	0.576249	0.797153	ENSMUSG00000053846(Lipg),ENSMUSG00000021759(Plpp1),ENSMUSG00000025059(Gk),ENSMUSG00000023827(Agpat4),ENSMUSG00000034731(Dgkh)	ENSMUSG00000020593(Lpin1),ENSMUSG00000040479(Dgkz),ENSMUSG00000022861(Dgkg),ENSMUSG00000025357(Dgka),ENSMUSG00000025509(Pnpla2),ENSMUSG00000031266(Gla),ENSMUSG00000026687(Aldh9a1)	http://www.kegg.jp/kegg-bin/show_pathway?map00561/K00864%09%23FFFFFF,red/K01080%09%23FFFFFF,red/K01189%09%23FFFFFF,green/K00149%09%23FFFFFF,green/K00901%09%23FFFFFF,purple/K13523%09%23FFFFFF,red/K15728%09%23FFFFFF,green/K22284%09%23FFFFFF,red/K16816%09%23FFFFFF,green/
mmu04114	Oocyte meiosis	Cellular Processes	Cell growth and death	13	9	22	114	0.578127	0.797153	ENSMUSG00000004936(Map2k1),ENSMUSG00000026626(Ppp2r5a),ENSMUSG00000020415(Pttg1),ENSMUSG00000020300(Cpeb4),ENSMUSG00000022092(Ppp3cc),ENSMUSG00000020271(Fbxw11),ENSMUSG00000009630(Ppp2cb),ENSMUSG00000053819(Camk2d),ENSMUSG00000020349(Ppp2ca),ENSMUSG00000001175(Calm1),ENSMUSG00000022285(Ywhaz),ENSMUSG00000014956(Ppp1cb),ENSMUSG00000029910(Mad2l1)	ENSMUSG00000002068(Ccne1),ENSMUSG00000030102(Itpr1),ENSMUSG00000019773(Fbxo5),ENSMUSG00000042644(Itpr3),ENSMUSG00000020654(Adcy3),ENSMUSG00000025358(Cdk2),ENSMUSG00000021820(Camk2g),ENSMUSG00000039652(Cpeb3),ENSMUSG00000005580(Adcy9)	http://www.kegg.jp/kegg-bin/show_pathway?map04114/K03362%09%23FFFFFF,red/K02602%09%23FFFFFF,purple/K06269%09%23FFFFFF,red/K06635%09%23FFFFFF,red/K02537%09%23FFFFFF,red/K16197%09%23FFFFFF,red/K08043%09%23FFFFFF,green/K04368%09%23FFFFFF,red/K11584%09%23FFFFFF,red/K04515%09%23FFFFFF,purple/K06626%09%23FFFFFF,green/K02206%09%23FFFFFF,green/K04382%09%23FFFFFF,red/K04960%09%23FFFFFF,green/K10292%09%23F…
mmu05217	Basal cell carcinoma	Human Diseases	Cancers: Specific types	6	6	12	63	0.600309	0.824108	ENSMUSG00000045005(Fzd5),ENSMUSG00000015312(Gadd45b),ENSMUSG00000044674(Fzd1),ENSMUSG00000015957(Wnt11),ENSMUSG00000033227(Wnt6),ENSMUSG00000023067(Cdkn1a)	ENSMUSG00000020888(Dvl2),ENSMUSG00000021453(Gadd45g),ENSMUSG00000021668(Polk),ENSMUSG00000001761(Smo),ENSMUSG00000050382(Kif7),ENSMUSG00000002109(Ddb2)	http://www.kegg.jp/kegg-bin/show_pathway?map05217/K01384%09%23FFFFFF,red/K02432%09%23FFFFFF,red/K18806%09%23FFFFFF,green/K06226%09%23FFFFFF,green/K02375%09%23FFFFFF,red/K00445%09%23FFFFFF,red/K04402%09%23FFFFFF,purple/K03511%09%23FFFFFF,green/K02353%09%23FFFFFF,green/K06625%09%23FFFFFF,red/K10140%09%23FFFFFF,green/
mmu00310	Lysine degradation	Metabolism	Amino acid metabolism	3	8	11	58	0.606582	0.829084	ENSMUSG00000062480(Acat3),ENSMUSG00000049327(Kmt5a),ENSMUSG00000071350(Setdb2)	ENSMUSG00000027984(Hadh),ENSMUSG00000019055(Plod1),ENSMUSG00000025465(Echs1),ENSMUSG00000059851(Kmt5c),ENSMUSG00000003809(Gcdh),ENSMUSG00000026687(Aldh9a1),ENSMUSG00000022853(Ehhadh),ENSMUSG00000037111(Setd7)	http://www.kegg.jp/kegg-bin/show_pathway?map00310/K18494%09%23FFFFFF,red/K11429%09%23FFFFFF,green/K07514%09%23FFFFFF,green/K07511%09%23FFFFFF,green/K00626%09%23FFFFFF,red/K00473%09%23FFFFFF,green/K00252%09%23FFFFFF,green/K00149%09%23FFFFFF,green/K00022%09%23FFFFFF,green/K11431%09%23FFFFFF,green/K11428%09%23FFFFFF,red/
mmu04261	Adrenergic signaling in cardiomyocytes	Organismal Systems	Circulatory system	19	8	27	142	0.612462	0.833482	ENSMUSG00000026626(Ppp2r5a),ENSMUSG00000031799(Tpm4),ENSMUSG00000003352(Cacnb3),ENSMUSG00000053436(Mapk14),ENSMUSG00000022052(Ppp2r2a),ENSMUSG00000009630(Ppp2cb),ENSMUSG00000019194(Scn1b),ENSMUSG00000053819(Camk2d),ENSMUSG00000026463(Atp2b4),ENSMUSG00000020901(Pik3r5),ENSMUSG00000046207(Pik3r6),ENSMUSG00000020573(Pik3cg),ENSMUSG00000053137(Mapk11),ENSMUSG00000024639(Gnaq),ENSMUSG00000053007(Creb5…	ENSMUSG00000045875(Adra1a),ENSMUSG00000020654(Adcy3),ENSMUSG00000040061(Plcb2),ENSMUSG00000015968(Cacna1d),ENSMUSG00000005580(Adcy9),ENSMUSG00000022469(Rapgef3),ENSMUSG00000038648(Creb3l2),ENSMUSG00000021820(Camk2g)	http://www.kegg.jp/kegg-bin/show_pathway?map04261/K04634%09%23FFFFFF,red/K08049%09%23FFFFFF,green/K04441%09%23FFFFFF,red/K02183%09%23FFFFFF,red/K08014%09%23FFFFFF,green/K08043%09%23FFFFFF,green/K04135%09%23FFFFFF,green/K04515%09%23FFFFFF,purple/K06269%09%23FFFFFF,red/K09048%09%23FFFFFF,green/K09047%09%23FFFFFF,red/K05858%09%23FFFFFF,green/K04845%09%23FFFFFF,red/K10375%09%23FFFFFF,red/K05850%09%23…
mmu00052	Galactose metabolism	Metabolism	Carbohydrate metabolism	3	3	6	32	0.622735	0.843792	ENSMUSG00000020277(Pfkl),ENSMUSG00000021196(Pfkp),ENSMUSG00000000628(Hk2)	ENSMUSG00000031266(Gla),ENSMUSG00000028413(B4galt1),ENSMUSG00000062646(Ganc)	http://www.kegg.jp/kegg-bin/show_pathway?map00052/K00844%09%23FFFFFF,red/K07966%09%23FFFFFF,green/K12317%09%23FFFFFF,green/K00850%09%23FFFFFF,red/K01189%09%23FFFFFF,green/
mmu05032	Morphine addiction	Human Diseases	Substance dependence	6	11	17	91	0.636087	0.85817	ENSMUSG00000028525(Pde4b),ENSMUSG00000029064(Gnb1),ENSMUSG00000036402(Gng12),ENSMUSG00000042249(Grk3),ENSMUSG00000023868(Pde10a),ENSMUSG00000052889(Prkcb)	ENSMUSG00000048240(Gng7),ENSMUSG00000005580(Adcy9),ENSMUSG00000019990(Pde7b),ENSMUSG00000024462(Gabbr1),ENSMUSG00000020654(Adcy3),ENSMUSG00000032766(Gng11),ENSMUSG00000004347(Pde1c),ENSMUSG00000030671(Pde3b),ENSMUSG00000043004(Gng2),ENSMUSG00000021699(Pde4d),ENSMUSG00000032192(Gnb5)	http://www.kegg.jp/kegg-bin/show_pathway?map05032/K07826%09%23FFFFFF,green/K04347%09%23FFFFFF,red/K08049%09%23FFFFFF,green/K04539%09%23FFFFFF,green/K13296%09%23FFFFFF,green/K18438%09%23FFFFFF,red/K08043%09%23FFFFFF,green/K04543%09%23FFFFFF,green/K13293%09%23FFFFFF,purple/K04615%09%23FFFFFF,green/K19662%09%23FFFFFF,red/K04536%09%23FFFFFF,red/K13755%09%23FFFFFF,green/K04546%09%23FFFFFF,green/K00910…
mmu04964	Proximal tubule bicarbonate reclamation	Organismal Systems	Excretory system	3	1	4	22	0.65427	0.871439	ENSMUSG00000027562(Car2),ENSMUSG00000025792(Slc25a10),ENSMUSG00000026103(Gls)	ENSMUSG00000040618(Pck2)	http://www.kegg.jp/kegg-bin/show_pathway?map04964/K01596%09%23FFFFFF,green/K13577%09%23FFFFFF,red/K01425%09%23FFFFFF,red/K18245%09%23FFFFFF,red/
mmu00500	Starch and sucrose metabolism	Metabolism	Carbohydrate metabolism	2	4	6	33	0.654275	0.871439	ENSMUSG00000000628(Hk2),ENSMUSG00000022707(Gbe1)	ENSMUSG00000037370(Enpp1),ENSMUSG00000019528(Gyg),ENSMUSG00000033059(Pygb),ENSMUSG00000062646(Ganc)	http://www.kegg.jp/kegg-bin/show_pathway?map00500/K00750%09%23FFFFFF,green/K12317%09%23FFFFFF,green/K01513%09%23FFFFFF,green/K00688%09%23FFFFFF,green/K00700%09%23FFFFFF,red/K00844%09%23FFFFFF,red/
mmu00030	Pentose phosphate pathway	Metabolism	Carbohydrate metabolism	4	2	6	33	0.654275	0.871439	ENSMUSG00000028961(Pgd),ENSMUSG00000020277(Pfkl),ENSMUSG00000050002(Idnk),ENSMUSG00000021196(Pfkp)	ENSMUSG00000025742(Prps2),ENSMUSG00000028980(H6pd)	http://www.kegg.jp/kegg-bin/show_pathway?map00030/K00033%09%23FFFFFF,red/K00948%09%23FFFFFF,green/K00851%09%23FFFFFF,red/K13937%09%23FFFFFF,green/K00850%09%23FFFFFF,red/
mmu00970	Aminoacyl-tRNA biosynthesis	Genetic Information Processing	Translation	1	7	8	44	0.657947	0.872616	ENSMUSG00000031948(Kars)	ENSMUSG00000056228(Cars2),ENSMUSG00000038838(Vars2),ENSMUSG00000026709(Dars2),ENSMUSG00000028085(Gatb),ENSMUSG00000063179(Pstk),ENSMUSG00000030515(Tarsl2),ENSMUSG00000018995(Nars2)	http://www.kegg.jp/kegg-bin/show_pathway?map00970/K10837%09%23FFFFFF,green/K01873%09%23FFFFFF,green/K01868%09%23FFFFFF,green/K01883%09%23FFFFFF,green/K01876%09%23FFFFFF,green/K04567%09%23FFFFFF,red/K01893%09%23FFFFFF,green/K02434%09%23FFFFFF,green/
mmu00524	Neomycin, kanamycin and gentamicin biosynthesis	Metabolism	Biosynthesis of other secondary metabolites	1	0	1	5	0.665674	0.875214	ENSMUSG00000000628(Hk2)	-	http://www.kegg.jp/kegg-bin/show_pathway?map00524/K00844%09%23FFFFFF,red/
mmu03018	RNA degradation	Genetic Information Processing	Folding, sorting and degradation	9	6	15	82	0.667186	0.875214	ENSMUSG00000034575(Tent4a),ENSMUSG00000020277(Pfkl),ENSMUSG00000036478(Btg1),ENSMUSG00000031843(Mphosph6),ENSMUSG00000024472(Dcp2),ENSMUSG00000021196(Pfkp),ENSMUSG00000032410(Xrn1),ENSMUSG00000020423(Btg2),ENSMUSG00000020464(Pnpt1)	ENSMUSG00000034724(Cnot6l),ENSMUSG00000037573(Tob1),ENSMUSG00000061286(Exosc5),ENSMUSG00000005682(Pan2),ENSMUSG00000060600(Eno3),ENSMUSG00000022685(Parn)	http://www.kegg.jp/kegg-bin/show_pathway?map03018/K12590%09%23FFFFFF,green/K12603%09%23FFFFFF,green/K03514%09%23FFFFFF,red/K12613%09%23FFFFFF,red/K12618%09%23FFFFFF,red/K14443%09%23FFFFFF,purple/K00962%09%23FFFFFF,red/K00850%09%23FFFFFF,red/K12571%09%23FFFFFF,green/K01148%09%23FFFFFF,green/K12593%09%23FFFFFF,red/K01689%09%23FFFFFF,green/
mmu00130	Ubiquinone and other terpenoid-quinone biosynthesis	Metabolism	Metabolism of cofactors and vitamins	1	1	2	11	0.668294	0.875214	ENSMUSG00000003849(Nqo1)	ENSMUSG00000053460(Ggcx)	http://www.kegg.jp/kegg-bin/show_pathway?map00130/K10106%09%23FFFFFF,green/K00355%09%23FFFFFF,red/
mmu04922	Glucagon signaling pathway	Organismal Systems	Endocrine system	6	12	18	99	0.685189	0.889576	ENSMUSG00000022092(Ppp3cc),ENSMUSG00000053819(Camk2d),ENSMUSG00000028645(Slc2a1),ENSMUSG00000024639(Gnaq),ENSMUSG00000053007(Creb5),ENSMUSG00000001175(Calm1)	ENSMUSG00000030671(Pde3b),ENSMUSG00000044167(Foxo1),ENSMUSG00000030102(Itpr1),ENSMUSG00000028944(Prkag2),ENSMUSG00000042644(Itpr3),ENSMUSG00000040061(Plcb2),ENSMUSG00000031295(Phka2),ENSMUSG00000024042(Sik1),ENSMUSG00000040618(Pck2),ENSMUSG00000033059(Pygb),ENSMUSG00000038648(Creb3l2),ENSMUSG00000021820(Camk2g)	http://www.kegg.jp/kegg-bin/show_pathway?map04922/K09048%09%23FFFFFF,green/K02183%09%23FFFFFF,red/K09047%09%23FFFFFF,red/K04515%09%23FFFFFF,purple/K04960%09%23FFFFFF,green/K07299%09%23FFFFFF,red/K04348%09%23FFFFFF,red/K04634%09%23FFFFFF,red/K05858%09%23FFFFFF,green/K07201%09%23FFFFFF,green/K00688%09%23FFFFFF,green/K04958%09%23FFFFFF,green/K07200%09%23FFFFFF,green/K07190%09%23FFFFFF,green/K01596%0…
mmu04726	Serotonergic synapse	Organismal Systems	Nervous system	11	13	24	131	0.686238	0.889576	ENSMUSG00000036402(Gng12),ENSMUSG00000029064(Gnb1),ENSMUSG00000056220(Pla2g4a),ENSMUSG00000032487(Ptgs2),ENSMUSG00000022892(App),ENSMUSG00000020838(Slc6a4),ENSMUSG00000024639(Gnaq),ENSMUSG00000000441(Raf1),ENSMUSG00000002413(Braf),ENSMUSG00000052889(Prkcb),ENSMUSG00000004936(Map2k1)	ENSMUSG00000022469(Rapgef3),ENSMUSG00000031628(Casp3),ENSMUSG00000048240(Gng7),ENSMUSG00000015968(Cacna1d),ENSMUSG00000026228(Htr2b),ENSMUSG00000040061(Plcb2),ENSMUSG00000042644(Itpr3),ENSMUSG00000047250(Ptgs1),ENSMUSG00000032766(Gng11),ENSMUSG00000030102(Itpr1),ENSMUSG00000043004(Gng2),ENSMUSG00000032192(Gnb5),ENSMUSG00000015224(Cyp2j9)	http://www.kegg.jp/kegg-bin/show_pathway?map04726/K04368%09%23FFFFFF,red/K04960%09%23FFFFFF,green/K05858%09%23FFFFFF,green/K04520%09%23FFFFFF,red/K04366%09%23FFFFFF,red/K08014%09%23FFFFFF,green/K04543%09%23FFFFFF,green/K00509%09%23FFFFFF,green/K16342%09%23FFFFFF,red/K07418%09%23FFFFFF,green/K04536%09%23FFFFFF,red/K04958%09%23FFFFFF,green/K11987%09%23FFFFFF,red/K04634%09%23FFFFFF,red/K04157%09%23F…
mmu00010	Glycolysis / Gluconeogenesis	Metabolism	Carbohydrate metabolism	7	5	12	67	0.689547	0.889576	ENSMUSG00000021196(Pfkp),ENSMUSG00000000628(Hk2),ENSMUSG00000062070(Pgk1),ENSMUSG00000020664(Dld),ENSMUSG00000055301(Adh7),ENSMUSG00000020277(Pfkl),ENSMUSG00000057666(Gapdh)	ENSMUSG00000060600(Eno3),ENSMUSG00000026687(Aldh9a1),ENSMUSG00000061099(Gapdhs),ENSMUSG00000040618(Pck2),ENSMUSG00000027452(Acss1)	http://www.kegg.jp/kegg-bin/show_pathway?map00010/K01596%09%23FFFFFF,green/K00927%09%23FFFFFF,red/K00850%09%23FFFFFF,red/K00134%09%23FFFFFF,red/K01689%09%23FFFFFF,green/K00382%09%23FFFFFF,red/K01895%09%23FFFFFF,green/K10705%09%23FFFFFF,green/K13951%09%23FFFFFF,red/K00149%09%23FFFFFF,green/K00844%09%23FFFFFF,red/
mmu04724	Glutamatergic synapse	Organismal Systems	Nervous system	8	12	20	110	0.690629	0.889576	ENSMUSG00000026103(Gls),ENSMUSG00000036402(Gng12),ENSMUSG00000029064(Gnb1),ENSMUSG00000056220(Pla2g4a),ENSMUSG00000024639(Gnaq),ENSMUSG00000052889(Prkcb),ENSMUSG00000022092(Ppp3cc),ENSMUSG00000042249(Grk3)	ENSMUSG00000015968(Cacna1d),ENSMUSG00000020654(Adcy3),ENSMUSG00000040061(Plcb2),ENSMUSG00000042644(Itpr3),ENSMUSG00000005580(Adcy9),ENSMUSG00000003378(Grik5),ENSMUSG00000048240(Gng7),ENSMUSG00000026473(Glul),ENSMUSG00000043004(Gng2),ENSMUSG00000032192(Gnb5),ENSMUSG00000032766(Gng11),ENSMUSG00000030102(Itpr1)	http://www.kegg.jp/kegg-bin/show_pathway?map04724/K04958%09%23FFFFFF,green/K08043%09%23FFFFFF,green/K05858%09%23FFFFFF,green/K01425%09%23FFFFFF,red/K04347%09%23FFFFFF,red/K08049%09%23FFFFFF,green/K04960%09%23FFFFFF,green/K04634%09%23FFFFFF,red/K16342%09%23FFFFFF,red/K04546%09%23FFFFFF,green/K04543%09%23FFFFFF,green/K00910%09%23FFFFFF,red/K05205%09%23FFFFFF,green/K04348%09%23FFFFFF,red/K04539%09%2…
mmu00260	Glycine, serine and threonine metabolism	Metabolism	Amino acid metabolism	5	2	7	40	0.696917	0.893996	ENSMUSG00000032786(Alas1),ENSMUSG00000078651(Aoc2),ENSMUSG00000020664(Dld),ENSMUSG00000028179(Cth),ENSMUSG00000053398(Phgdh)	ENSMUSG00000035637(Grhpr),ENSMUSG00000032607(Amt)	http://www.kegg.jp/kegg-bin/show_pathway?map00260/K01758%09%23FFFFFF,red/K00643%09%23FFFFFF,red/K00049%09%23FFFFFF,green/K00058%09%23FFFFFF,red/K00605%09%23FFFFFF,green/K00382%09%23FFFFFF,red/K00276%09%23FFFFFF,red/
mmu04971	Gastric acid secretion	Organismal Systems	Digestive system	6	7	13	73	0.701346	0.896005	ENSMUSG00000052889(Prkcb),ENSMUSG00000027562(Car2),ENSMUSG00000052397(Ezr),ENSMUSG00000053819(Camk2d),ENSMUSG00000024639(Gnaq),ENSMUSG00000001175(Calm1)	ENSMUSG00000030102(Itpr1),ENSMUSG00000040061(Plcb2),ENSMUSG00000020654(Adcy3),ENSMUSG00000042644(Itpr3),ENSMUSG00000005580(Adcy9),ENSMUSG00000044708(Kcnj10),ENSMUSG00000021820(Camk2g)	http://www.kegg.jp/kegg-bin/show_pathway?map04971/K04960%09%23FFFFFF,green/K02183%09%23FFFFFF,red/K08007%09%23FFFFFF,red/K08049%09%23FFFFFF,green/K18245%09%23FFFFFF,red/K04634%09%23FFFFFF,red/K04958%09%23FFFFFF,green/K05858%09%23FFFFFF,green/K19662%09%23FFFFFF,red/K05003%09%23FFFFFF,green/K08043%09%23FFFFFF,green/K04515%09%23FFFFFF,purple/
mmu04350	TGF-beta signaling pathway	Environmental Information Processing	Signal transduction	8	7	15	84	0.704791	0.896747	ENSMUSG00000022346(Myc),ENSMUSG00000024290(Rock1),ENSMUSG00000000532(Acvr1b),ENSMUSG00000024401(Tnf),ENSMUSG00000041324(Inhba),ENSMUSG00000020349(Ppp2ca),ENSMUSG00000073802(Cdkn2b),ENSMUSG00000009630(Ppp2cb)	ENSMUSG00000027796(Smad9),ENSMUSG00000025880(Smad7),ENSMUSG00000024232(Bambi),ENSMUSG00000021253(Tgfb3),ENSMUSG00000042745(Id1),ENSMUSG00000032440(Tgfbr2),ENSMUSG00000061393(Acvr2b)	http://www.kegg.jp/kegg-bin/show_pathway?map04350/K13377%09%23FFFFFF,green/K10162%09%23FFFFFF,green/K04388%09%23FFFFFF,green/K19631%09%23FFFFFF,green/K13596%09%23FFFFFF,green/K13567%09%23FFFFFF,red/K03156%09%23FFFFFF,red/K04667%09%23FFFFFF,red/K04377%09%23FFFFFF,red/K04514%09%23FFFFFF,red/K04382%09%23FFFFFF,red/K04685%09%23FFFFFF,red/K04680%09%23FFFFFF,green/K16791%09%23FFFFFF,green/
mmu00511	Other glycan degradation	Metabolism	Glycan biosynthesis and metabolism	0	3	3	18	0.717475	0.898522	-	ENSMUSG00000039307(Hexdc),ENSMUSG00000028164(Manba),ENSMUSG00000033857(Engase)	http://www.kegg.jp/kegg-bin/show_pathway?map00511/K01227%09%23FFFFFF,green/K14459%09%23FFFFFF,green/K01192%09%23FFFFFF,green/
mmu00120	Primary bile acid biosynthesis	Metabolism	Lipid metabolism	1	2	3	18	0.717475	0.898522	ENSMUSG00000050370(Ch25h)	ENSMUSG00000022244(Amacr),ENSMUSG00000026170(Cyp27a1)	http://www.kegg.jp/kegg-bin/show_pathway?map00120/K01796%09%23FFFFFF,green/K10223%09%23FFFFFF,red/K00488%09%23FFFFFF,green/
mmu04727	GABAergic synapse	Organismal Systems	Nervous system	6	9	15	85	0.7226	0.898522	ENSMUSG00000027646(Src),ENSMUSG00000047454(Gphn),ENSMUSG00000026103(Gls),ENSMUSG00000029064(Gnb1),ENSMUSG00000036402(Gng12),ENSMUSG00000052889(Prkcb)	ENSMUSG00000024462(Gabbr1),ENSMUSG00000020654(Adcy3),ENSMUSG00000015968(Cacna1d),ENSMUSG00000048240(Gng7),ENSMUSG00000005580(Adcy9),ENSMUSG00000043004(Gng2),ENSMUSG00000032192(Gnb5),ENSMUSG00000026473(Glul),ENSMUSG00000032766(Gng11)	http://www.kegg.jp/kegg-bin/show_pathway?map04727/K15376%09%23FFFFFF,red/K07826%09%23FFFFFF,green/K08049%09%23FFFFFF,green/K04615%09%23FFFFFF,green/K04536%09%23FFFFFF,red/K19662%09%23FFFFFF,red/K04347%09%23FFFFFF,red/K01915%09%23FFFFFF,green/K04543%09%23FFFFFF,green/K04539%09%23FFFFFF,green/K08043%09%23FFFFFF,green/K04851%09%23FFFFFF,green/K05704%09%23FFFFFF,red/K04546%09%23FFFFFF,green/K01425%09…
mmu04911	Insulin secretion	Organismal Systems	Endocrine system	6	9	15	85	0.7226	0.898522	ENSMUSG00000052889(Prkcb),ENSMUSG00000038260(Trpm4),ENSMUSG00000028645(Slc2a1),ENSMUSG00000053819(Camk2d),ENSMUSG00000053007(Creb5),ENSMUSG00000024639(Gnaq)	ENSMUSG00000002908(Kcnn1),ENSMUSG00000040061(Plcb2),ENSMUSG00000020654(Adcy3),ENSMUSG00000042644(Itpr3),ENSMUSG00000015968(Cacna1d),ENSMUSG00000031840(Rab3a),ENSMUSG00000005580(Adcy9),ENSMUSG00000021820(Camk2g),ENSMUSG00000038648(Creb3l2)	http://www.kegg.jp/kegg-bin/show_pathway?map04911/K19662%09%23FFFFFF,red/K04960%09%23FFFFFF,green/K07299%09%23FFFFFF,red/K09048%09%23FFFFFF,green/K04851%09%23FFFFFF,green/K07882%09%23FFFFFF,green/K04634%09%23FFFFFF,red/K04515%09%23FFFFFF,purple/K04942%09%23FFFFFF,green/K04979%09%23FFFFFF,red/K08043%09%23FFFFFF,green/K05858%09%23FFFFFF,green/K08049%09%23FFFFFF,green/K09047%09%23FFFFFF,red/
mmu00592	alpha-Linolenic acid metabolism	Metabolism	Lipid metabolism	2	2	4	24	0.723411	0.898522	ENSMUSG00000060675(Plaat3),ENSMUSG00000056220(Pla2g4a)	ENSMUSG00000028751(Pla2g2e),ENSMUSG00000029098(Acox3)	http://www.kegg.jp/kegg-bin/show_pathway?map00592/K00232%09%23FFFFFF,green/K16342%09%23FFFFFF,red/K01047%09%23FFFFFF,green/K16817%09%23FFFFFF,red/
mmu00534	Glycosaminoglycan biosynthesis - heparan sulfate / heparin	Metabolism	Glycan biosynthesis and metabolism	2	2	4	24	0.723411	0.898522	ENSMUSG00000070407(Hs3st3b1),ENSMUSG00000061731(Ext1)	ENSMUSG00000030657(Xylt1),ENSMUSG00000040151(Hs2st1)	http://www.kegg.jp/kegg-bin/show_pathway?map00534/K00771%09%23FFFFFF,green/K02513%09%23FFFFFF,green/K02366%09%23FFFFFF,red/K07809%09%23FFFFFF,red/
mmu00410	beta-Alanine metabolism	Metabolism	Metabolism of other amino acids	1	4	5	31	0.757933	0.93768	ENSMUSG00000078651(Aoc2)	ENSMUSG00000041426(Hibch),ENSMUSG00000022853(Ehhadh),ENSMUSG00000025465(Echs1),ENSMUSG00000026687(Aldh9a1)	http://www.kegg.jp/kegg-bin/show_pathway?map00410/K07514%09%23FFFFFF,green/K00276%09%23FFFFFF,red/K07511%09%23FFFFFF,green/K00149%09%23FFFFFF,green/K05605%09%23FFFFFF,green/
mmu03022	Basal transcription factors	Genetic Information Processing	Transcription	4	3	7	43	0.768945	0.947558	ENSMUSG00000051316(Taf7),ENSMUSG00000002658(Gtf2f1),ENSMUSG00000067995(Gtf2f2),ENSMUSG00000028271(Gtf2b)	ENSMUSG00000023079(Gtf2ird1),ENSMUSG00000021639(Gtf2h2),ENSMUSG00000060261(Gtf2i)	http://www.kegg.jp/kegg-bin/show_pathway?map03022/K03142%09%23FFFFFF,green/K03124%09%23FFFFFF,red/K03132%09%23FFFFFF,red/K03139%09%23FFFFFF,red/K03138%09%23FFFFFF,red/K03121%09%23FFFFFF,green/
mmu05031	Amphetamine addiction	Human Diseases	Substance dependence	6	5	11	66	0.775865	0.952336	ENSMUSG00000053819(Camk2d),ENSMUSG00000053007(Creb5),ENSMUSG00000014956(Ppp1cb),ENSMUSG00000001175(Calm1),ENSMUSG00000052889(Prkcb),ENSMUSG00000022092(Ppp3cc)	ENSMUSG00000015968(Cacna1d),ENSMUSG00000038648(Creb3l2),ENSMUSG00000052684(Jun),ENSMUSG00000021820(Camk2g),ENSMUSG00000021250(Fos)	http://www.kegg.jp/kegg-bin/show_pathway?map05031/K04448%09%23FFFFFF,green/K04379%09%23FFFFFF,green/K09047%09%23FFFFFF,red/K19662%09%23FFFFFF,red/K06269%09%23FFFFFF,red/K09048%09%23FFFFFF,green/K04348%09%23FFFFFF,red/K04515%09%23FFFFFF,purple/K02183%09%23FFFFFF,red/K04851%09%23FFFFFF,green/
mmu04918	Thyroid hormone synthesis	Organismal Systems	Endocrine system	4	8	12	72	0.782575	0.95682	ENSMUSG00000031584(Gsr),ENSMUSG00000052889(Prkcb),ENSMUSG00000053007(Creb5),ENSMUSG00000024639(Gnaq)	ENSMUSG00000030102(Itpr1),ENSMUSG00000040061(Plcb2),ENSMUSG00000020654(Adcy3),ENSMUSG00000033222(Ttf2),ENSMUSG00000042644(Itpr3),ENSMUSG00000005580(Adcy9),ENSMUSG00000025823(Pdia4),ENSMUSG00000038648(Creb3l2)	http://www.kegg.jp/kegg-bin/show_pathway?map04918/K08043%09%23FFFFFF,green/K19662%09%23FFFFFF,red/K09047%09%23FFFFFF,red/K00383%09%23FFFFFF,red/K04634%09%23FFFFFF,red/K04958%09%23FFFFFF,green/K09582%09%23FFFFFF,green/K04960%09%23FFFFFF,green/K05858%09%23FFFFFF,green/K15173%09%23FFFFFF,green/K09048%09%23FFFFFF,green/K08049%09%23FFFFFF,green/
mmu04932	Non-alcoholic fatty liver disease (NAFLD)	Human Diseases	Endocrine and metabolic diseases	16	9	25	144	0.788095	0.958344	ENSMUSG00000021116(Eif2s1),ENSMUSG00000024401(Tnf),ENSMUSG00000028163(Nfkb1),ENSMUSG00000021936(Mapk8),ENSMUSG00000025076(Casp7),ENSMUSG00000027398(Il1b),ENSMUSG00000041417(Pik3r1),ENSMUSG00000063694(Cycs),ENSMUSG00000027399(Il1a),ENSMUSG00000025746(Il6),ENSMUSG00000004446(Bid),ENSMUSG00000024927(Rela),ENSMUSG00000053113(Socs3),ENSMUSG00000071369(Map3k5),ENSMUSG00000024778(Fas),ENSMUSG00000026942…	ENSMUSG00000027947(Il6ra),ENSMUSG00000038894(Irs2),ENSMUSG00000031834(Pik3r2),ENSMUSG00000055980(Irs1),ENSMUSG00000028944(Prkag2),ENSMUSG00000031628(Casp3),ENSMUSG00000052684(Jun),ENSMUSG00000034957(Cebpa),ENSMUSG00000015846(Rxra)	http://www.kegg.jp/kegg-bin/show_pathway?map04932/K04397%09%23FFFFFF,red/K03237%09%23FFFFFF,red/K07187%09%23FFFFFF,green/K04440%09%23FFFFFF,red/K08524%09%23FFFFFF,green/K04726%09%23FFFFFF,red/K04390%09%23FFFFFF,red/K03156%09%23FFFFFF,red/K16172%09%23FFFFFF,green/K04519%09%23FFFFFF,red/K04696%09%23FFFFFF,red/K08738%09%23FFFFFF,red/K04383%09%23FFFFFF,red/K04735%09%23FFFFFF,red/K02649%09%23FFFFFF,pu…
mmu04962	Vasopressin-regulated water reabsorption	Organismal Systems	Excretory system	3	4	7	44	0.789945	0.958344	ENSMUSG00000053007(Creb5),ENSMUSG00000030220(Arhgdib),ENSMUSG00000018707(Dync1h1)	ENSMUSG00000038648(Creb3l2),ENSMUSG00000005580(Adcy9),ENSMUSG00000020654(Adcy3),ENSMUSG00000024253(Dync2li1)	http://www.kegg.jp/kegg-bin/show_pathway?map04962/K12462%09%23FFFFFF,red/K09048%09%23FFFFFF,green/K08049%09%23FFFFFF,green/K09047%09%23FFFFFF,red/K08043%09%23FFFFFF,green/K10417%09%23FFFFFF,green/K10413%09%23FFFFFF,red/
mmu03013	RNA transport	Genetic Information Processing	Translation	26	3	29	167	0.801693	0.964202	ENSMUSG00000000838(Fmr1),ENSMUSG00000001440(Kpnb1),ENSMUSG00000067194(Eif1ax),ENSMUSG00000063550(Nup98),ENSMUSG00000056076(Eif3b),ENSMUSG00000079614(Seh1l),ENSMUSG00000005610(Eif4g2),ENSMUSG00000029715(Pop7),ENSMUSG00000021282(Eif5),ENSMUSG00000030447(Cyfip1),ENSMUSG00000057561(Eif1a),ENSMUSG00000028683(Eif2b3),ENSMUSG00000051329(Nup160),ENSMUSG00000030188(Magohb),ENSMUSG00000022325(Pop1),ENSMUSG…	ENSMUSG00000020091(Eif4ebp2),ENSMUSG00000040621(Gemin8),ENSMUSG00000036678(Aaas)	http://www.kegg.jp/kegg-bin/show_pathway?map03013/K14527%09%23FFFFFF,red/K14303%09%23FFFFFF,red/K14320%09%23FFFFFF,green/K03238%09%23FFFFFF,red/K18644%09%23FFFFFF,green/K03241%09%23FFFFFF,red/K03538%09%23FFFFFF,red/K12877%09%23FFFFFF,red/K07936%09%23FFFFFF,red/K03245%09%23FFFFFF,red/K15516%09%23FFFFFF,red/K03253%09%23FFFFFF,red/K03259%09%23FFFFFF,red/K14307%09%23FFFFFF,red/K13136%09%23FFFFFF,gree…
mmu04744	Phototransduction	Organismal Systems	Sensory system	4	0	4	27	0.806955	0.964202	ENSMUSG00000029491(Pde6b),ENSMUSG00000020599(Rgs9),ENSMUSG00000029064(Gnb1),ENSMUSG00000001175(Calm1)	-	http://www.kegg.jp/kegg-bin/show_pathway?map04744/K04536%09%23FFFFFF,red/K02183%09%23FFFFFF,red/K13765%09%23FFFFFF,red/K13756%09%23FFFFFF,red/
mmu04966	Collecting duct acid secretion	Organismal Systems	Excretory system	2	2	4	27	0.806955	0.964202	ENSMUSG00000019210(Atp6v1e1),ENSMUSG00000027562(Car2)	ENSMUSG00000019302(Atp6v0a1),ENSMUSG00000028238(Atp6v0d2)	http://www.kegg.jp/kegg-bin/show_pathway?map04966/K02146%09%23FFFFFF,green/K02150%09%23FFFFFF,red/K18245%09%23FFFFFF,red/K02154%09%23FFFFFF,green/
mmu00350	Tyrosine metabolism	Metabolism	Amino acid metabolism	3	3	6	39	0.807096	0.964202	ENSMUSG00000078651(Aoc2),ENSMUSG00000063558(Aox1),ENSMUSG00000055301(Adh7)	ENSMUSG00000025190(Got1),ENSMUSG00000045316(Fahd1),ENSMUSG00000000326(Comt)	http://www.kegg.jp/kegg-bin/show_pathway?map00350/K13951%09%23FFFFFF,red/K14454%09%23FFFFFF,green/K01557%09%23FFFFFF,green/K00276%09%23FFFFFF,red/K00545%09%23FFFFFF,green/K00157%09%23FFFFFF,red/
mmu04970	Salivary secretion	Organismal Systems	Digestive system	7	6	13	80	0.81844	0.972869	ENSMUSG00000052889(Prkcb),ENSMUSG00000024639(Gnaq),ENSMUSG00000038357(Camp),ENSMUSG00000001175(Calm1),ENSMUSG00000029084(Cd38),ENSMUSG00000026463(Atp2b4),ENSMUSG00000029082(Bst1)	ENSMUSG00000045875(Adra1a),ENSMUSG00000030102(Itpr1),ENSMUSG00000005580(Adcy9),ENSMUSG00000020654(Adcy3),ENSMUSG00000040061(Plcb2),ENSMUSG00000042644(Itpr3)	http://www.kegg.jp/kegg-bin/show_pathway?map04970/K05850%09%23FFFFFF,red/K13916%09%23FFFFFF,red/K04960%09%23FFFFFF,green/K19662%09%23FFFFFF,red/K08043%09%23FFFFFF,green/K05858%09%23FFFFFF,green/K04135%09%23FFFFFF,green/K18152%09%23FFFFFF,red/K01242%09%23FFFFFF,red/K04634%09%23FFFFFF,red/K02183%09%23FFFFFF,red/K04958%09%23FFFFFF,green/K08049%09%23FFFFFF,green/
mmu00604	Glycosphingolipid biosynthesis - ganglio series	Metabolism	Glycan biosynthesis and metabolism	1	1	2	15	0.82538	0.972869	ENSMUSG00000013846(St3gal1)	ENSMUSG00000056091(St3gal5)	http://www.kegg.jp/kegg-bin/show_pathway?map00604/K03370%09%23FFFFFF,green/K00780%09%23FFFFFF,red/
mmu04141	Protein processing in endoplasmic reticulum	Genetic Information Processing	Folding, sorting and degradation	20	8	28	164	0.826285	0.972869	ENSMUSG00000078578(Ube2d3),ENSMUSG00000090877(Hspa1b),ENSMUSG00000021831(Ero1a),ENSMUSG00000021936(Mapk8),ENSMUSG00000028277(Ube2j1),ENSMUSG00000039703(Nploc4),ENSMUSG00000024079(Eif2ak2),ENSMUSG00000021116(Eif2s1),ENSMUSG00000015839(Nfe2l2),ENSMUSG00000071369(Map3k5),ENSMUSG00000026942(Traf2),ENSMUSG00000031770(Herpud1),ENSMUSG00000026740(Dnajc1),ENSMUSG00000028410(Dnaja1),ENSMUSG00000091971(Hsp…	ENSMUSG00000037306(Man1c1),ENSMUSG00000042104(Uggt2),ENSMUSG00000023826(Prkn),ENSMUSG00000074093(Svip),ENSMUSG00000025823(Pdia4),ENSMUSG00000057069(Ero1b),ENSMUSG00000005102(Eif2ak4),ENSMUSG00000029616(Erp29)	http://www.kegg.jp/kegg-bin/show_pathway?map04141/K14014%09%23FFFFFF,green/K16195%09%23FFFFFF,red/K09582%09%23FFFFFF,green/K03173%09%23FFFFFF,red/K10976%09%23FFFFFF,green/K04426%09%23FFFFFF,red/K10950%09%23FFFFFF,red/K11718%09%23FFFFFF,green/K09502%09%23FFFFFF,red/K14015%09%23FFFFFF,red/K09586%09%23FFFFFF,green/K04440%09%23FFFFFF,red/K04554%09%23FFFFFF,red/K04079%09%23FFFFFF,red/K09503%09%23FFFFF…
mmu00400	Phenylalanine, tyrosine and tryptophan biosynthesis	Metabolism	Amino acid metabolism	0	1	1	8	0.826783	0.972869	-	ENSMUSG00000025190(Got1)	http://www.kegg.jp/kegg-bin/show_pathway?map00400/K14454%09%23FFFFFF,green/
mmu03020	RNA polymerase	Genetic Information Processing	Transcription	1	3	4	29	0.850299	0.994256	ENSMUSG00000000776(Polr3d)	ENSMUSG00000035834(Polr3g),ENSMUSG00000005198(Polr2a),ENSMUSG00000028104(Polr3gl)	http://www.kegg.jp/kegg-bin/show_pathway?map03020/K03006%09%23FFFFFF,green/K03026%09%23FFFFFF,red/K03024%09%23FFFFFF,green/
mmu04924	Renin secretion	Organismal Systems	Endocrine system	3	8	11	71	0.851311	0.994256	ENSMUSG00000022092(Ppp3cc),ENSMUSG00000001175(Calm1),ENSMUSG00000024639(Gnaq)	ENSMUSG00000015968(Cacna1d),ENSMUSG00000027931(Npr1),ENSMUSG00000037759(Ptger2),ENSMUSG00000040061(Plcb2),ENSMUSG00000042644(Itpr3),ENSMUSG00000030671(Pde3b),ENSMUSG00000004347(Pde1c),ENSMUSG00000030102(Itpr1)	http://www.kegg.jp/kegg-bin/show_pathway?map04924/K04259%09%23FFFFFF,green/K04958%09%23FFFFFF,green/K13296%09%23FFFFFF,green/K04960%09%23FFFFFF,green/K04851%09%23FFFFFF,green/K04348%09%23FFFFFF,red/K13755%09%23FFFFFF,green/K02183%09%23FFFFFF,red/K12323%09%23FFFFFF,green/K05858%09%23FFFFFF,green/K04634%09%23FFFFFF,red/
mmu04610	Complement and coagulation cascades	Organismal Systems	Immune system	13	1	14	89	0.85953	1	ENSMUSG00000031444(F10),ENSMUSG00000090231(Cfb),ENSMUSG00000048376(F2r),ENSMUSG00000027611(Procr),ENSMUSG00000046223(Plaur),ENSMUSG00000055172(C1ra),ENSMUSG00000026399(Cd55),ENSMUSG00000024164(C3),ENSMUSG00000062345(Serpinb2),ENSMUSG00000049130(C5ar1),ENSMUSG00000028128(F3),ENSMUSG00000021675(F2rl2),ENSMUSG00000037411(Serpine1)	ENSMUSG00000074743(Thbd)	http://www.kegg.jp/kegg-bin/show_pathway?map04610/K01314%09%23FFFFFF,red/K04010%09%23FFFFFF,red/K03990%09%23FFFFFF,red/K03901%09%23FFFFFF,red/K06557%09%23FFFFFF,red/K03982%09%23FFFFFF,red/K03985%09%23FFFFFF,red/K04235%09%23FFFFFF,red/K03914%09%23FFFFFF,red/K19821%09%23FFFFFF,red/K04006%09%23FFFFFF,red/K03907%09%23FFFFFF,green/K01335%09%23FFFFFF,red/K01330%09%23FFFFFF,red/
mmu04973	Carbohydrate digestion and absorption	Organismal Systems	Digestive system	4	2	6	43	0.875589	1	ENSMUSG00000041417(Pik3r1),ENSMUSG00000052889(Prkcb),ENSMUSG00000000628(Hk2),ENSMUSG00000029072(Tas1r3)	ENSMUSG00000015968(Cacna1d),ENSMUSG00000031834(Pik3r2)	http://www.kegg.jp/kegg-bin/show_pathway?map04973/K00844%09%23FFFFFF,red/K04626%09%23FFFFFF,red/K19662%09%23FFFFFF,red/K04851%09%23FFFFFF,green/K02649%09%23FFFFFF,purple/
mmu04960	Aldosterone-regulated sodium reabsorption	Organismal Systems	Excretory system	2	3	5	38	0.893171	1	ENSMUSG00000052889(Prkcb),ENSMUSG00000041417(Pik3r1)	ENSMUSG00000031834(Pik3r2),ENSMUSG00000030340(Scnn1a),ENSMUSG00000055980(Irs1)	http://www.kegg.jp/kegg-bin/show_pathway?map04960/K19662%09%23FFFFFF,red/K04824%09%23FFFFFF,green/K02649%09%23FFFFFF,purple/K16172%09%23FFFFFF,green/
mmu00980	Metabolism of xenobiotics by cytochrome P450	Metabolism	Xenobiotics biodegradation and metabolism	3	7	10	69	0.895749	1	ENSMUSG00000055301(Adh7),ENSMUSG00000001663(Gstt1),ENSMUSG00000090145(Ugt1a6b)	ENSMUSG00000051483(Cbr1),ENSMUSG00000040703(Cyp2s1),ENSMUSG00000028743(Akr7a5),ENSMUSG00000029919(Hpgds),ENSMUSG00000001665(Gstt3),ENSMUSG00000029864(Gstk1),ENSMUSG00000033318(Gstt2)	http://www.kegg.jp/kegg-bin/show_pathway?map00980/K07420%09%23FFFFFF,green/K00799%09%23FFFFFF,purple/K15303%09%23FFFFFF,green/K13951%09%23FFFFFF,red/K00079%09%23FFFFFF,green/K04097%09%23FFFFFF,green/K00699%09%23FFFFFF,red/K13299%09%23FFFFFF,green/
mmu04130	SNARE interactions in vesicular transport	Genetic Information Processing	Folding, sorting and degradation	2	2	4	32	0.899683	1	ENSMUSG00000026470(Stx6),ENSMUSG00000039232(Stx11)	ENSMUSG00000061455(Stx17),ENSMUSG00000030337(Vamp1)	http://www.kegg.jp/kegg-bin/show_pathway?map04130/K08510%09%23FFFFFF,green/K08491%09%23FFFFFF,green/K08487%09%23FFFFFF,red/K08498%09%23FFFFFF,red/
mmu04913	Ovarian steroidogenesis	Organismal Systems	Endocrine system	4	4	8	58	0.907183	1	ENSMUSG00000032487(Ptgs2),ENSMUSG00000056220(Pla2g4a),ENSMUSG00000032193(Ldlr),ENSMUSG00000026675(Hsd17b7)	ENSMUSG00000005580(Adcy9),ENSMUSG00000020654(Adcy3),ENSMUSG00000019301(Hsd17b1),ENSMUSG00000015224(Cyp2j9)	http://www.kegg.jp/kegg-bin/show_pathway?map04913/K11987%09%23FFFFFF,red/K16342%09%23FFFFFF,red/K00044%09%23FFFFFF,green/K08049%09%23FFFFFF,green/K07418%09%23FFFFFF,green/K12473%09%23FFFFFF,red/K08043%09%23FFFFFF,green/K13373%09%23FFFFFF,red/
mmu04972	Pancreatic secretion	Organismal Systems	Digestive system	7	9	16	106	0.908982	1	ENSMUSG00000052889(Prkcb),ENSMUSG00000027562(Car2),ENSMUSG00000029084(Cd38),ENSMUSG00000029082(Bst1),ENSMUSG00000026463(Atp2b4),ENSMUSG00000052681(Rap1b),ENSMUSG00000024639(Gnaq)	ENSMUSG00000028751(Pla2g2e),ENSMUSG00000030102(Itpr1),ENSMUSG00000048677(Tpcn2),ENSMUSG00000042644(Itpr3),ENSMUSG00000040061(Plcb2),ENSMUSG00000020654(Adcy3),ENSMUSG00000001865(Cpa3),ENSMUSG00000005580(Adcy9),ENSMUSG00000019066(Rab3d)	http://www.kegg.jp/kegg-bin/show_pathway?map04972/K08780%09%23FFFFFF,green/K07836%09%23FFFFFF,red/K05858%09%23FFFFFF,green/K05850%09%23FFFFFF,red/K01242%09%23FFFFFF,red/K07884%09%23FFFFFF,green/K18152%09%23FFFFFF,red/K04958%09%23FFFFFF,green/K08043%09%23FFFFFF,green/K18245%09%23FFFFFF,red/K01047%09%23FFFFFF,green/K19662%09%23FFFFFF,red/K14077%09%23FFFFFF,green/K08049%09%23FFFFFF,green/K04634%09%2…
mmu00020	Citrate cycle (TCA cycle)	Metabolism	Carbohydrate metabolism	3	1	4	33	0.912612	1	ENSMUSG00000024892(Pcx),ENSMUSG00000005683(Cs),ENSMUSG00000020664(Dld)	ENSMUSG00000040618(Pck2)	http://www.kegg.jp/kegg-bin/show_pathway?map00020/K01958%09%23FFFFFF,red/K01596%09%23FFFFFF,green/K00382%09%23FFFFFF,red/K01647%09%23FFFFFF,red/
mmu04978	Mineral absorption	Organismal Systems	Digestive system	4	1	5	40	0.917157	1	ENSMUSG00000066150(Slc31a1),ENSMUSG00000063354(Slc39a4),ENSMUSG00000023030(Slc11a2),ENSMUSG00000005413(Hmox1)	ENSMUSG00000025993(Slc40a1)	http://www.kegg.jp/kegg-bin/show_pathway?map04978/K14685%09%23FFFFFF,green/K14686%09%23FFFFFF,red/K00510%09%23FFFFFF,red/K14710%09%23FFFFFF,red/K21398%09%23FFFFFF,red/
mmu05030	Cocaine addiction	Human Diseases	Substance dependence	4	2	6	47	0.922406	1	ENSMUSG00000024927(Rela),ENSMUSG00000053007(Creb5),ENSMUSG00000020599(Rgs9),ENSMUSG00000028163(Nfkb1)	ENSMUSG00000038648(Creb3l2),ENSMUSG00000052684(Jun)	http://www.kegg.jp/kegg-bin/show_pathway?map05030/K09048%09%23FFFFFF,green/K04735%09%23FFFFFF,red/K13765%09%23FFFFFF,red/K09047%09%23FFFFFF,red/K02580%09%23FFFFFF,red/K04448%09%23FFFFFF,green/
mmu00982	Drug metabolism - cytochrome P450	Metabolism	Xenobiotics biodegradation and metabolism	4	5	9	67	0.931191	1	ENSMUSG00000063558(Aox1),ENSMUSG00000090145(Ugt1a6b),ENSMUSG00000001663(Gstt1),ENSMUSG00000055301(Adh7)	ENSMUSG00000033318(Gstt2),ENSMUSG00000028088(Fmo5),ENSMUSG00000029864(Gstk1),ENSMUSG00000001665(Gstt3),ENSMUSG00000029919(Hpgds)	http://www.kegg.jp/kegg-bin/show_pathway?map00982/K04097%09%23FFFFFF,green/K00799%09%23FFFFFF,purple/K13951%09%23FFFFFF,red/K00699%09%23FFFFFF,red/K00485%09%23FFFFFF,green/K13299%09%23FFFFFF,green/K00157%09%23FFFFFF,red/
mmu04723	Retrograde endocannabinoid signaling	Organismal Systems	Nervous system	8	13	21	139	0.932786	1	ENSMUSG00000036402(Gng12),ENSMUSG00000029064(Gnb1),ENSMUSG00000053436(Mapk14),ENSMUSG00000032487(Ptgs2),ENSMUSG00000024639(Gnaq),ENSMUSG00000053137(Mapk11),ENSMUSG00000052889(Prkcb),ENSMUSG00000021936(Mapk8)	ENSMUSG00000039206(Daglb),ENSMUSG00000005580(Adcy9),ENSMUSG00000032766(Gng11),ENSMUSG00000030102(Itpr1),ENSMUSG00000048240(Gng7),ENSMUSG00000044968(Napepld),ENSMUSG00000015968(Cacna1d),ENSMUSG00000043004(Gng2),ENSMUSG00000035735(Dagla),ENSMUSG00000032192(Gnb5),ENSMUSG00000040061(Plcb2),ENSMUSG00000020654(Adcy3),ENSMUSG00000042644(Itpr3)	http://www.kegg.jp/kegg-bin/show_pathway?map04723/K04536%09%23FFFFFF,red/K04851%09%23FFFFFF,green/K13806%09%23FFFFFF,green/K13985%09%23FFFFFF,green/K08049%09%23FFFFFF,green/K04440%09%23FFFFFF,red/K04634%09%23FFFFFF,red/K11987%09%23FFFFFF,red/K04539%09%23FFFFFF,green/K04543%09%23FFFFFF,green/K07826%09%23FFFFFF,green/K04347%09%23FFFFFF,red/K04441%09%23FFFFFF,red/K05858%09%23FFFFFF,green/K04958%09%2…
mmu04976	Bile secretion	Organismal Systems	Digestive system	6	5	11	80	0.93567	1	ENSMUSG00000032849(Abcc4),ENSMUSG00000032204(Aqp9),ENSMUSG00000027562(Car2),ENSMUSG00000032193(Ldlr),ENSMUSG00000021670(Hmgcr),ENSMUSG00000028645(Slc2a1)	ENSMUSG00000005580(Adcy9),ENSMUSG00000020865(Abcc3),ENSMUSG00000027698(Nceh1),ENSMUSG00000015846(Rxra),ENSMUSG00000020654(Adcy3)	http://www.kegg.jp/kegg-bin/show_pathway?map04976/K08049%09%23FFFFFF,green/K05673%09%23FFFFFF,red/K09877%09%23FFFFFF,red/K00021%09%23FFFFFF,red/K18245%09%23FFFFFF,red/K07299%09%23FFFFFF,red/K14349%09%23FFFFFF,green/K12473%09%23FFFFFF,red/K08524%09%23FFFFFF,green/K08043%09%23FFFFFF,green/K05667%09%23FFFFFF,green/
mmu00360	Phenylalanine metabolism	Metabolism	Amino acid metabolism	1	1	2	22	0.948582	1	ENSMUSG00000078651(Aoc2)	ENSMUSG00000025190(Got1)	http://www.kegg.jp/kegg-bin/show_pathway?map00360/K00276%09%23FFFFFF,red/K14454%09%23FFFFFF,green/
mmu00590	Arachidonic acid metabolism	Metabolism	Lipid metabolism	5	6	11	85	0.96153	1	ENSMUSG00000032487(Ptgs2),ENSMUSG00000056220(Pla2g4a),ENSMUSG00000071072(Ptges3),ENSMUSG00000050737(Ptges),ENSMUSG00000060675(Plaat3)	ENSMUSG00000047250(Ptgs1),ENSMUSG00000015224(Cyp2j9),ENSMUSG00000028751(Pla2g2e),ENSMUSG00000029919(Hpgds),ENSMUSG00000051483(Cbr1),ENSMUSG00000015889(Lta4h)	http://www.kegg.jp/kegg-bin/show_pathway?map00590/K15730%09%23FFFFFF,red/K00509%09%23FFFFFF,green/K00079%09%23FFFFFF,green/K01047%09%23FFFFFF,green/K04097%09%23FFFFFF,green/K16817%09%23FFFFFF,red/K16342%09%23FFFFFF,red/K15729%09%23FFFFFF,red/K07418%09%23FFFFFF,green/K11987%09%23FFFFFF,red/K01254%09%23FFFFFF,green/
mmu00330	Arginine and proline metabolism	Metabolism	Amino acid metabolism	1	5	6	54	0.968267	1	ENSMUSG00000020826(Nos2)	ENSMUSG00000028737(Aldh4a1),ENSMUSG00000025176(Hoga1),ENSMUSG00000019718(L3hypdh),ENSMUSG00000026687(Aldh9a1),ENSMUSG00000025190(Got1)	http://www.kegg.jp/kegg-bin/show_pathway?map00330/K00149%09%23FFFFFF,green/K18123%09%23FFFFFF,green/K00294%09%23FFFFFF,green/K13241%09%23FFFFFF,red/K18384%09%23FFFFFF,green/K14454%09%23FFFFFF,green/
mmu00040	Pentose and glucuronate interconversions	Metabolism	Carbohydrate metabolism	1	2	3	34	0.975098	1	ENSMUSG00000090145(Ugt1a6b)	ENSMUSG00000027227(Sord),ENSMUSG00000035769(Xylb)	http://www.kegg.jp/kegg-bin/show_pathway?map00040/K00008%09%23FFFFFF,green/K00854%09%23FFFFFF,green/K00699%09%23FFFFFF,red/
mmu05034	Alcoholism	Human Diseases	Substance dependence	15	13	28	193	0.975244	1	ENSMUSG00000002413(Braf),ENSMUSG00000020178(Adora2a),ENSMUSG00000027018(Hat1),ENSMUSG00000004936(Map2k1),ENSMUSG00000018500(Adora2b),ENSMUSG00000029064(Gnb1),ENSMUSG00000001175(Calm1),ENSMUSG00000036402(Gng12),ENSMUSG00000053007(Creb5),ENSMUSG00000016559(H3f3b),ENSMUSG00000014956(Ppp1cb),ENSMUSG00000037894(H2az1),ENSMUSG00000028800(Hdac1),ENSMUSG00000029471(Camkk2),ENSMUSG00000000441(Raf1)	ENSMUSG00000004698(Hdac9),ENSMUSG00000068854(H2bc21),ENSMUSG00000020312(Shc2),ENSMUSG00000032766(Gng11),ENSMUSG00000043004(Gng2),ENSMUSG00000032192(Gnb5),ENSMUSG00000031161(Hdac6),ENSMUSG00000038648(Creb3l2),ENSMUSG00000048240(Gng7),ENSMUSG00000008855(Hdac5),ENSMUSG00000035109(Shc4),ENSMUSG00000041126(H2az2),ENSMUSG00000062906(Hdac10)	http://www.kegg.jp/kegg-bin/show_pathway?map05034/K11303%09%23FFFFFF,red/K06067%09%23FFFFFF,red/K09048%09%23FFFFFF,green/K04266%09%23FFFFFF,red/K07826%09%23FFFFFF,green/K02183%09%23FFFFFF,red/K09047%09%23FFFFFF,red/K04365%09%23FFFFFF,red/K17447%09%23FFFFFF,green/K11409%09%23FFFFFF,green/K04536%09%23FFFFFF,red/K04347%09%23FFFFFF,red/K04267%09%23FFFFFF,red/K11252%09%23FFFFFF,green/K07359%09%23FFFFF…
mmu00591	Linoleic acid metabolism	Metabolism	Lipid metabolism	3	2	5	49	0.97586	1	ENSMUSG00000029727(Cyp3a13),ENSMUSG00000060675(Plaat3),ENSMUSG00000056220(Pla2g4a)	ENSMUSG00000015224(Cyp2j9),ENSMUSG00000028751(Pla2g2e)	http://www.kegg.jp/kegg-bin/show_pathway?map00591/K16342%09%23FFFFFF,red/K07424%09%23FFFFFF,red/K01047%09%23FFFFFF,green/K16817%09%23FFFFFF,red/K07418%09%23FFFFFF,green/
mmu05204	Chemical carcinogenesis	Human Diseases	Cancers: Overview	5	7	12	97	0.97903	1	ENSMUSG00000032487(Ptgs2),ENSMUSG00000090145(Ugt1a6b),ENSMUSG00000001663(Gstt1),ENSMUSG00000055301(Adh7),ENSMUSG00000029727(Cyp3a13)	ENSMUSG00000051483(Cbr1),ENSMUSG00000030711(Sult1a1),ENSMUSG00000033318(Gstt2),ENSMUSG00000029864(Gstk1),ENSMUSG00000001665(Gstt3),ENSMUSG00000029919(Hpgds),ENSMUSG00000039648(Kyat1)	http://www.kegg.jp/kegg-bin/show_pathway?map05204/K11987%09%23FFFFFF,red/K04097%09%23FFFFFF,green/K13299%09%23FFFFFF,green/K01014%09%23FFFFFF,green/K00816%09%23FFFFFF,green/K07424%09%23FFFFFF,red/K13951%09%23FFFFFF,red/K00699%09%23FFFFFF,red/K00079%09%23FFFFFF,green/K00799%09%23FFFFFF,purple/
mmu00053	Ascorbate and aldarate metabolism	Metabolism	Carbohydrate metabolism	1	1	2	27	0.979542	1	ENSMUSG00000090145(Ugt1a6b)	ENSMUSG00000026687(Aldh9a1)	http://www.kegg.jp/kegg-bin/show_pathway?map00053/K00699%09%23FFFFFF,red/K00149%09%23FFFFFF,green/
mmu04961	Endocrine and other factor-regulated calcium reabsorption	Organismal Systems	Excretory system	2	3	5	52	0.984425	1	ENSMUSG00000024639(Gnaq),ENSMUSG00000052889(Prkcb)	ENSMUSG00000005580(Adcy9),ENSMUSG00000019768(Esr1),ENSMUSG00000040061(Plcb2)	http://www.kegg.jp/kegg-bin/show_pathway?map04961/K04634%09%23FFFFFF,red/K08049%09%23FFFFFF,green/K05858%09%23FFFFFF,green/K19662%09%23FFFFFF,red/K08550%09%23FFFFFF,green/
mmu00983	Drug metabolism - other enzymes	Metabolism	Xenobiotics biodegradation and metabolism	3	7	10	88	0.986885	1	ENSMUSG00000020407(Upp1),ENSMUSG00000090145(Ugt1a6b),ENSMUSG00000001663(Gstt1)	ENSMUSG00000033318(Gstt2),ENSMUSG00000020649(Rrm2),ENSMUSG00000001665(Gstt3),ENSMUSG00000035824(Tk2),ENSMUSG00000022814(Umps),ENSMUSG00000024177(Nme4),ENSMUSG00000027203(Dut)	http://www.kegg.jp/kegg-bin/show_pathway?map00983/K00757%09%23FFFFFF,red/K00857%09%23FFFFFF,green/K01520%09%23FFFFFF,green/K00699%09%23FFFFFF,red/K10808%09%23FFFFFF,green/K00799%09%23FFFFFF,purple/K13421%09%23FFFFFF,green/K00940%09%23FFFFFF,green/
mmu05010	Alzheimer's disease	Human Diseases	Neurodegenerative diseases	13	9	22	165	0.987635	1	ENSMUSG00000024778(Fas),ENSMUSG00000001175(Calm1),ENSMUSG00000022892(App),ENSMUSG00000024639(Gnaq),ENSMUSG00000027398(Il1b),ENSMUSG00000025076(Casp7),ENSMUSG00000057666(Gapdh),ENSMUSG00000022092(Ppp3cc),ENSMUSG00000004446(Bid),ENSMUSG00000052593(Adam17),ENSMUSG00000032375(Aph1b),ENSMUSG00000063694(Cycs),ENSMUSG00000024401(Tnf)	ENSMUSG00000031628(Casp3),ENSMUSG00000028914(Casp9),ENSMUSG00000015968(Cacna1d),ENSMUSG00000040249(Lrp1),ENSMUSG00000040061(Plcb2),ENSMUSG00000042644(Itpr3),ENSMUSG00000030102(Itpr1),ENSMUSG00000010609(Psen2),ENSMUSG00000053040(Aph1c)	http://www.kegg.jp/kegg-bin/show_pathway?map05010/K04634%09%23FFFFFF,red/K04726%09%23FFFFFF,red/K02187%09%23FFFFFF,green/K06172%09%23FFFFFF,purple/K02183%09%23FFFFFF,red/K06059%09%23FFFFFF,red/K04960%09%23FFFFFF,green/K04851%09%23FFFFFF,green/K04520%09%23FFFFFF,red/K04958%09%23FFFFFF,green/K05858%09%23FFFFFF,green/K08738%09%23FFFFFF,red/K03156%09%23FFFFFF,red/K04550%09%23FFFFFF,green/K04399%09%23…
mmu04721	Synaptic vesicle cycle	Organismal Systems	Nervous system	2	4	6	61	0.987916	1	ENSMUSG00000026797(Stxbp1),ENSMUSG00000019210(Atp6v1e1)	ENSMUSG00000031840(Rab3a),ENSMUSG00000019302(Atp6v0a1),ENSMUSG00000028456(Unc13b),ENSMUSG00000028238(Atp6v0d2)	http://www.kegg.jp/kegg-bin/show_pathway?map04721/K02146%09%23FFFFFF,green/K15293%09%23FFFFFF,green/K07882%09%23FFFFFF,green/K02150%09%23FFFFFF,red/K02154%09%23FFFFFF,green/K15292%09%23FFFFFF,red/
mmu03040	Spliceosome	Genetic Information Processing	Transcription	15	1	16	130	0.990457	1	ENSMUSG00000029169(Dhx15),ENSMUSG00000091971(Hspa1a),ENSMUSG00000063800(Prpf38a),ENSMUSG00000022858(Tra2b),ENSMUSG00000024498(Tcerg1),ENSMUSG00000030188(Magohb),ENSMUSG00000046434(Hnrnpa1),ENSMUSG00000030512(Snrpa1),ENSMUSG00000071172(Srsf3),ENSMUSG00000025024(Smndc1),ENSMUSG00000029817(Tra2a),ENSMUSG00000061613(U2af1),ENSMUSG00000063480(Snu13),ENSMUSG00000002477(Snrpd1),ENSMUSG00000090877(Hspa1b)	ENSMUSG00000060288(Ppih)	http://www.kegg.jp/kegg-bin/show_pathway?map03040/K12741%09%23FFFFFF,red/K12839%09%23FFFFFF,red/K12820%09%23FFFFFF,red/K12849%09%23FFFFFF,red/K12897%09%23FFFFFF,red/K12836%09%23FFFFFF,red/K11092%09%23FFFFFF,red/K11087%09%23FFFFFF,red/K12845%09%23FFFFFF,red/K12877%09%23FFFFFF,red/K09567%09%23FFFFFF,green/K03283%09%23FFFFFF,red/K12824%09%23FFFFFF,red/K12892%09%23FFFFFF,red/
mmu04977	Vitamin digestion and absorption	Organismal Systems	Digestive system	1	0	1	22	0.991963	1	ENSMUSG00000023088(Abcc1)	-	http://www.kegg.jp/kegg-bin/show_pathway?map04977/K05665%09%23FFFFFF,red/
mmu03015	mRNA surveillance pathway	Genetic Information Processing	Translation	8	2	10	92	0.991971	1	ENSMUSG00000009630(Ppp2cb),ENSMUSG00000030188(Magohb),ENSMUSG00000020349(Ppp2ca),ENSMUSG00000014956(Ppp1cb),ENSMUSG00000024360(Etf1),ENSMUSG00000026626(Ppp2r5a),ENSMUSG00000022052(Ppp2r2a),ENSMUSG00000062203(Gspt1)	ENSMUSG00000071723(Gspt2),ENSMUSG00000069769(Msi2)	http://www.kegg.jp/kegg-bin/show_pathway?map03015/K11584%09%23FFFFFF,red/K04354%09%23FFFFFF,red/K04382%09%23FFFFFF,red/K03267%09%23FFFFFF,purple/K14411%09%23FFFFFF,green/K03265%09%23FFFFFF,red/K12877%09%23FFFFFF,red/K06269%09%23FFFFFF,red/
mmu05012	Parkinson's disease	Human Diseases	Neurodegenerative diseases	10	5	15	127	0.993436	1	ENSMUSG00000029223(Uchl1),ENSMUSG00000028277(Ube2j1),ENSMUSG00000063694(Cycs),ENSMUSG00000036273(Lrrk2),ENSMUSG00000023286(Ube2j2),ENSMUSG00000020178(Adora2a),ENSMUSG00000032596(Uba7),ENSMUSG00000008892(Vdac3),ENSMUSG00000021868(Ppif),ENSMUSG00000027078(Ube2l6)	ENSMUSG00000028756(Pink1),ENSMUSG00000023826(Prkn),ENSMUSG00000028914(Casp9),ENSMUSG00000031628(Casp3),ENSMUSG00000068329(Htra2)	http://www.kegg.jp/kegg-bin/show_pathway?map05012/K05611%09%23FFFFFF,red/K04553%09%23FFFFFF,red/K08844%09%23FFFFFF,red/K04556%09%23FFFFFF,green/K08669%09%23FFFFFF,green/K04266%09%23FFFFFF,red/K04554%09%23FFFFFF,red/K02187%09%23FFFFFF,green/K15041%09%23FFFFFF,red/K04399%09%23FFFFFF,green/K09565%09%23FFFFFF,red/K10578%09%23FFFFFF,red/K10698%09%23FFFFFF,red/K08738%09%23FFFFFF,red/K05688%09%23FFFFFF,…
mmu05322	Systemic lupus erythematosus	Human Diseases	Immune diseases	13	4	17	140	0.993461	1	ENSMUSG00000016559(H3f3b),ENSMUSG00000073421(H2-Ab1),ENSMUSG00000037894(H2az1),ENSMUSG00000075122(Cd80),ENSMUSG00000016529(Il10),ENSMUSG00000017652(Cd40),ENSMUSG00000022901(Cd86),ENSMUSG00000024334(H2-Oa),ENSMUSG00000002477(Snrpd1),ENSMUSG00000024401(Tnf),ENSMUSG00000055172(C1ra),ENSMUSG00000024164(C3),ENSMUSG00000030966(Trim21)	ENSMUSG00000026012(Cd28),ENSMUSG00000041126(H2az2),ENSMUSG00000068854(H2bc21),ENSMUSG00000018199(Ro60)	http://www.kegg.jp/kegg-bin/show_pathway?map05322/K11089%09%23FFFFFF,green/K05443%09%23FFFFFF,red/K03156%09%23FFFFFF,red/K01330%09%23FFFFFF,red/K11087%09%23FFFFFF,red/K05413%09%23FFFFFF,red/K11253%09%23FFFFFF,red/K03160%09%23FFFFFF,red/K06470%09%23FFFFFF,green/K03990%09%23FFFFFF,red/K06752%09%23FFFFFF,red/K11252%09%23FFFFFF,green/K10651%09%23FFFFFF,red/K11251%09%23FFFFFF,purple/K05412%09%23FFFFFF…
mmu04614	Renin-angiotensin system	Organismal Systems	Endocrine system	1	1	2	36	0.996341	1	ENSMUSG00000019849(Prep)	ENSMUSG00000001865(Cpa3)	http://www.kegg.jp/kegg-bin/show_pathway?map04614/K08780%09%23FFFFFF,green/K01322%09%23FFFFFF,red/
mmu04975	Fat digestion and absorption	Organismal Systems	Digestive system	1	1	2	37	0.996989	1	ENSMUSG00000021759(Plpp1)	ENSMUSG00000028751(Pla2g2e)	http://www.kegg.jp/kegg-bin/show_pathway?map04975/K01047%09%23FFFFFF,green/K01080%09%23FFFFFF,red/
mmu04950	Maturity onset diabetes of the young	Human Diseases	Endocrine and metabolic diseases	0	1	1	27	0.997318	1	-	ENSMUSG00000024986(Hhex)	http://www.kegg.jp/kegg-bin/show_pathway?map04950/K08024%09%23FFFFFF,green/
mmu03060	Protein export	Genetic Information Processing	Folding, sorting and degradation	1	0	1	27	0.997318	1	ENSMUSG00000079108(Srp54c)	-	http://www.kegg.jp/kegg-bin/show_pathway?map03060/K03106%09%23FFFFFF,red/
mmu04974	Protein digestion and absorption	Organismal Systems	Digestive system	6	3	9	94	0.997532	1	ENSMUSG00000045672(Col27a1),ENSMUSG00000019838(Slc16a10),ENSMUSG00000031502(Col4a1),ENSMUSG00000001435(Col18a1),ENSMUSG00000031503(Col4a2),ENSMUSG00000004098(Col5a3)	ENSMUSG00000020600(Slc7a15),ENSMUSG00000001865(Cpa3),ENSMUSG00000054640(Slc8a1)	http://www.kegg.jp/kegg-bin/show_pathway?map04974/K08187%09%23FFFFFF,red/K06823%09%23FFFFFF,red/K19721%09%23FFFFFF,red/K13868%09%23FFFFFF,green/K08780%09%23FFFFFF,green/K06237%09%23FFFFFF,red/K05849%09%23FFFFFF,green/
mmu05016	Huntington's disease	Human Diseases	Neurodegenerative diseases	10	10	20	183	0.999506	1	ENSMUSG00000024639(Gnaq),ENSMUSG00000053007(Creb5),ENSMUSG00000021868(Ppif),ENSMUSG00000037820(Tgm2),ENSMUSG00000028800(Hdac1),ENSMUSG00000032965(Ift57),ENSMUSG00000008892(Vdac3),ENSMUSG00000033987(Dnah17),ENSMUSG00000063694(Cycs),ENSMUSG00000006818(Sod2)	ENSMUSG00000038648(Creb3l2),ENSMUSG00000002083(Bbc3),ENSMUSG00000031628(Casp3),ENSMUSG00000028914(Casp9),ENSMUSG00000040061(Plcb2),ENSMUSG00000005198(Polr2a),ENSMUSG00000030102(Itpr1),ENSMUSG00000000440(Pparg),ENSMUSG00000042523(Dnal1),ENSMUSG00000039959(Hip1)	http://www.kegg.jp/kegg-bin/show_pathway?map05016/K04399%09%23FFFFFF,green/K15041%09%23FFFFFF,red/K09565%09%23FFFFFF,red/K08530%09%23FFFFFF,green/K04559%09%23FFFFFF,green/K10411%09%23FFFFFF,green/K04958%09%23FFFFFF,green/K04634%09%23FFFFFF,red/K03006%09%23FFFFFF,green/K10408%09%23FFFFFF,red/K09047%09%23FFFFFF,red/K04564%09%23FFFFFF,red/K05858%09%23FFFFFF,green/K04638%09%23FFFFFF,red/K08738%09%23F…
mmu04714	Thermogenesis	Organismal Systems	Environmental adaptation	13	11	24	212	0.999621	1	ENSMUSG00000028949(Smarcd3),ENSMUSG00000028945(Rheb),ENSMUSG00000018796(Acsl1),ENSMUSG00000024981(Acsl5),ENSMUSG00000029580(Actb),ENSMUSG00000053436(Mapk14),ENSMUSG00000026112(Coa5),ENSMUSG00000071369(Map3k5),ENSMUSG00000037935(Smarce1),ENSMUSG00000053137(Mapk11),ENSMUSG00000053007(Creb5),ENSMUSG00000062825(Actg1),ENSMUSG00000031278(Acsl4)	ENSMUSG00000024082(Ndufaf7),ENSMUSG00000051671(Coa6),ENSMUSG00000000440(Pparg),ENSMUSG00000027931(Npr1),ENSMUSG00000031565(Fgfr1),ENSMUSG00000020654(Adcy3),ENSMUSG00000038648(Creb3l2),ENSMUSG00000025509(Pnpla2),ENSMUSG00000005580(Adcy9),ENSMUSG00000028944(Prkag2),ENSMUSG00000024921(Smarca2)	http://www.kegg.jp/kegg-bin/show_pathway?map04714/K08530%09%23FFFFFF,green/K09048%09%23FFFFFF,green/K08043%09%23FFFFFF,green/K18164%09%23FFFFFF,green/K11647%09%23FFFFFF,green/K11651%09%23FFFFFF,red/K08049%09%23FFFFFF,green/K04362%09%23FFFFFF,green/K07200%09%23FFFFFF,green/K18179%09%23FFFFFF,green/K09047%09%23FFFFFF,red/K07208%09%23FFFFFF,red/K16816%09%23FFFFFF,green/K04441%09%23FFFFFF,red/K11650%…
mmu00830	Retinol metabolism	Metabolism	Metabolism of cofactors and vitamins	4	3	7	94	0.999738	1	ENSMUSG00000055301(Adh7),ENSMUSG00000090145(Ugt1a6b),ENSMUSG00000063558(Aox1),ENSMUSG00000029727(Cyp3a13)	ENSMUSG00000040703(Cyp2s1),ENSMUSG00000027068(Dhrs9),ENSMUSG00000066026(Dhrs3)	http://www.kegg.jp/kegg-bin/show_pathway?map00830/K07424%09%23FFFFFF,red/K07420%09%23FFFFFF,green/K13951%09%23FFFFFF,red/K00157%09%23FFFFFF,red/K11149%09%23FFFFFF,green/K00699%09%23FFFFFF,red/K11146%09%23FFFFFF,green/
mmu04742	Taste transduction	Organismal Systems	Sensory system	1	5	6	87	0.999783	1	ENSMUSG00000029072(Tas1r3)	ENSMUSG00000027765(P2ry1),ENSMUSG00000030340(Scnn1a),ENSMUSG00000004347(Pde1c),ENSMUSG00000024462(Gabbr1),ENSMUSG00000042644(Itpr3)	http://www.kegg.jp/kegg-bin/show_pathway?map04742/K04270%09%23FFFFFF,green/K04960%09%23FFFFFF,green/K04824%09%23FFFFFF,green/K04626%09%23FFFFFF,red/K13755%09%23FFFFFF,green/K04615%09%23FFFFFF,green/
mmu04260	Cardiac muscle contraction	Organismal Systems	Circulatory system	3	1	4	71	0.999827	1	ENSMUSG00000053395(Cacng8),ENSMUSG00000003352(Cacnb3),ENSMUSG00000031799(Tpm4)	ENSMUSG00000015968(Cacna1d)	http://www.kegg.jp/kegg-bin/show_pathway?map04260/K04873%09%23FFFFFF,red/K04851%09%23FFFFFF,green/K04864%09%23FFFFFF,red/K10375%09%23FFFFFF,red/
mmu00140	Steroid hormone biosynthesis	Metabolism	Lipid metabolism	4	2	6	90	0.999868	1	ENSMUSG00000090145(Ugt1a6b),ENSMUSG00000029727(Cyp3a13),ENSMUSG00000027195(Hsd17b12),ENSMUSG00000026675(Hsd17b7)	ENSMUSG00000000326(Comt),ENSMUSG00000019301(Hsd17b1)	http://www.kegg.jp/kegg-bin/show_pathway?map00140/K07424%09%23FFFFFF,red/K10251%09%23FFFFFF,red/K00044%09%23FFFFFF,green/K00545%09%23FFFFFF,green/K00699%09%23FFFFFF,red/K13373%09%23FFFFFF,red/
mmu04080	Neuroactive ligand-receptor interaction	Environmental Information Processing	Signaling molecules and interaction	17	15	32	319	0.999999	1	ENSMUSG00000048376(F2r),ENSMUSG00000020178(Adora2a),ENSMUSG00000033470(Cysltr2),ENSMUSG00000059588(Calcrl),ENSMUSG00000024431(Nr3c1),ENSMUSG00000052270(Fpr2),ENSMUSG00000045551(Fpr1),ENSMUSG00000038668(Lpar1),ENSMUSG00000018500(Adora2b),ENSMUSG00000023964(Calcr),ENSMUSG00000054293(P2ry10b),ENSMUSG00000049130(C5ar1),ENSMUSG00000022122(Ednrb),ENSMUSG00000052821(Cysltr1),ENSMUSG00000043017(Ptgir),EN…	ENSMUSG00000035773(Kiss1r),ENSMUSG00000045875(Adra1a),ENSMUSG00000027765(P2ry1),ENSMUSG00000029468(P2rx7),ENSMUSG00000041189(Chrnb1),ENSMUSG00000037759(Ptger2),ENSMUSG00000045092(S1pr1),ENSMUSG00000048779(P2ry6),ENSMUSG00000003378(Grik5),ENSMUSG00000053004(Hrh1),ENSMUSG00000062585(Cnr2),ENSMUSG00000033446(Lpar6),ENSMUSG00000026271(Gpr35),ENSMUSG00000024462(Gabbr1),ENSMUSG00000026228(Htr2b)	http://www.kegg.jp/kegg-bin/show_pathway?map04080/K05205%09%23FFFFFF,green/K04266%09%23FFFFFF,red/K04274%09%23FFFFFF,red/K04272%09%23FFFFFF,green/K04577%09%23FFFFFF,red/K04198%09%23FFFFFF,red/K04615%09%23FFFFFF,green/K03914%09%23FFFFFF,red/K04235%09%23FFFFFF,red/K04173%09%23FFFFFF,red/K04157%09%23FFFFFF,green/K08374%09%23FFFFFF,green/K05220%09%23FFFFFF,green/K04289%09%23FFFFFF,red/K04270%09%23FFF…
mmu03010	Ribosome	Genetic Information Processing	Translation	6	0	6	130	1	1	ENSMUSG00000052146(Rps10),ENSMUSG00000041453(Rpl21),ENSMUSG00000015672(Mrpl32),ENSMUSG00000032215(Rsl24d1),ENSMUSG00000032563(Mrpl3),ENSMUSG00000039221(Rpl22l1)	-	http://www.kegg.jp/kegg-bin/show_pathway?map03010/K02906%09%23FFFFFF,red/K02889%09%23FFFFFF,red/K02891%09%23FFFFFF,red/K02911%09%23FFFFFF,red/K02896%09%23FFFFFF,red/K02947%09%23FFFFFF,red/
mmu00190	Oxidative phosphorylation	Metabolism	Energy metabolism	2	2	4	118	1	1	ENSMUSG00000020089(Ppa1),ENSMUSG00000019210(Atp6v1e1)	ENSMUSG00000019302(Atp6v0a1),ENSMUSG00000028238(Atp6v0d2)	http://www.kegg.jp/kegg-bin/show_pathway?map00190/K01507%09%23FFFFFF,red/K02150%09%23FFFFFF,red/K02154%09%23FFFFFF,green/K02146%09%23FFFFFF,green/
mmu04740	Olfactory transduction	Organismal Systems	Sensory system	7	8	15	1142	1	1	ENSMUSG00000045381(Olfr433),ENSMUSG00000053819(Camk2d),ENSMUSG00000040328(Olfr56),ENSMUSG00000001175(Calm1),ENSMUSG00000029064(Gnb1),ENSMUSG00000045514(Olfr460),ENSMUSG00000042249(Grk3)	ENSMUSG00000020654(Adcy3),ENSMUSG00000048292(Olfr1417),ENSMUSG00000026360(Rgs2),ENSMUSG00000048240(Gng7),ENSMUSG00000021820(Camk2g),ENSMUSG00000054640(Slc8a1),ENSMUSG00000061039(Olfr920),ENSMUSG00000004347(Pde1c)	http://www.kegg.jp/kegg-bin/show_pathway?map04740/K00910%09%23FFFFFF,red/K05849%09%23FFFFFF,green/K18154%09%23FFFFFF,green/K13755%09%23FFFFFF,green/K04257%09%23FFFFFF,purple/K04543%09%23FFFFFF,green/K08043%09%23FFFFFF,green/K02183%09%23FFFFFF,red/K04536%09%23FFFFFF,red/K04515%09%23FFFFFF,purple/
