# Supplementary material for: Transcriptomics and quantitative proteomics reveal changes after second stimulation of bone marrow-derived macrophages from lupus-prone MRL/lpr mice
Source: Front Immunol. 2022 Oct 19;13:1004232. doi: 10.3389/fimmu.2022.1004232 (PMC9627492; doi:10.3389/fimmu.2022.1004232)
Supplement: Supplementary file 8 [file Table_8.xlsx]

## Sheet: Sheet1
Category	GO.ID	Term	Up	Down	DEG	Total	Pvalue	FDR	Up_Gene	Down_Gene
CC	GO:0005622	intracellular	1800	1924	3724	14178	4.19678e-117	6.89782e-113	ENSMUSG00000000001(Gnai3),ENSMUSG00000000078(Klf6),ENSMUSG00000000184(Ccnd2),ENSMUSG00000000247(Lhx2),ENSMUSG00000000275(Trim25),ENSMUSG00000000409(Lck),ENSMUSG00000000532(Acvr1b),ENSMUSG00000000555(Itga5),ENSMUSG00000000568(Hnrnpd),ENSMUSG00000000600(Krit1),ENSMUSG00000000628(Hk2),ENSMUSG00000000708(Kat2b),ENSMUSG00000000730(Dnmt3l),ENSMUSG00000000732(Icosl),ENSMUSG00000000776(Polr3d),ENSMUSG000…	ENSMUSG00000000028(Cdc45),ENSMUSG00000000056(Narf),ENSMUSG00000000149(Gna12),ENSMUSG00000000282(Mnt),ENSMUSG00000000326(Comt),ENSMUSG00000000440(Pparg),ENSMUSG00000000631(Myo18a),ENSMUSG00000000673(Haao),ENSMUSG00000000751(Rpa1),ENSMUSG00000000823(Zfp512b),ENSMUSG00000000876(Pxmp4),ENSMUSG00000000884(Gnb1l),ENSMUSG00000001036(Epn2),ENSMUSG00000001053(N4bp3),ENSMUSG00000001054(Rmnd5b),ENSMUSG00000…
CC	GO:0005737	cytoplasm	1514	1520	3034	11011	6.78297e-98	5.57425e-94	ENSMUSG00000000001(Gnai3),ENSMUSG00000000078(Klf6),ENSMUSG00000000184(Ccnd2),ENSMUSG00000000275(Trim25),ENSMUSG00000000409(Lck),ENSMUSG00000000532(Acvr1b),ENSMUSG00000000555(Itga5),ENSMUSG00000000568(Hnrnpd),ENSMUSG00000000600(Krit1),ENSMUSG00000000628(Hk2),ENSMUSG00000000708(Kat2b),ENSMUSG00000000730(Dnmt3l),ENSMUSG00000000732(Icosl),ENSMUSG00000000776(Polr3d),ENSMUSG00000000838(Fmr1),ENSMUSG000…	ENSMUSG00000000149(Gna12),ENSMUSG00000000326(Comt),ENSMUSG00000000440(Pparg),ENSMUSG00000000631(Myo18a),ENSMUSG00000000673(Haao),ENSMUSG00000000876(Pxmp4),ENSMUSG00000000884(Gnb1l),ENSMUSG00000001036(Epn2),ENSMUSG00000001053(N4bp3),ENSMUSG00000001054(Rmnd5b),ENSMUSG00000001120(Pcbp3),ENSMUSG00000001143(Lman2l),ENSMUSG00000001228(Uhrf1),ENSMUSG00000001366(Fbxo9),ENSMUSG00000001419(Mef2d),ENSMUSG00…
CC	GO:0043226	organelle	1635	1751	3386	12861	1.64977e-88	9.03852e-85	ENSMUSG00000000001(Gnai3),ENSMUSG00000000078(Klf6),ENSMUSG00000000184(Ccnd2),ENSMUSG00000000247(Lhx2),ENSMUSG00000000275(Trim25),ENSMUSG00000000409(Lck),ENSMUSG00000000555(Itga5),ENSMUSG00000000568(Hnrnpd),ENSMUSG00000000600(Krit1),ENSMUSG00000000628(Hk2),ENSMUSG00000000682(Cd52),ENSMUSG00000000708(Kat2b),ENSMUSG00000000730(Dnmt3l),ENSMUSG00000000732(Icosl),ENSMUSG00000000776(Polr3d),ENSMUSG00000…	ENSMUSG00000000028(Cdc45),ENSMUSG00000000056(Narf),ENSMUSG00000000282(Mnt),ENSMUSG00000000326(Comt),ENSMUSG00000000440(Pparg),ENSMUSG00000000631(Myo18a),ENSMUSG00000000673(Haao),ENSMUSG00000000751(Rpa1),ENSMUSG00000000823(Zfp512b),ENSMUSG00000000876(Pxmp4),ENSMUSG00000001036(Epn2),ENSMUSG00000001053(N4bp3),ENSMUSG00000001054(Rmnd5b),ENSMUSG00000001120(Pcbp3),ENSMUSG00000001138(Cnnm3),ENSMUSG00000…
CC	GO:0043229	intracellular organelle	1606	1706	3312	12518	4.2929e-87	1.76395e-83	ENSMUSG00000000001(Gnai3),ENSMUSG00000000078(Klf6),ENSMUSG00000000184(Ccnd2),ENSMUSG00000000247(Lhx2),ENSMUSG00000000275(Trim25),ENSMUSG00000000409(Lck),ENSMUSG00000000555(Itga5),ENSMUSG00000000568(Hnrnpd),ENSMUSG00000000600(Krit1),ENSMUSG00000000628(Hk2),ENSMUSG00000000708(Kat2b),ENSMUSG00000000730(Dnmt3l),ENSMUSG00000000732(Icosl),ENSMUSG00000000776(Polr3d),ENSMUSG00000000838(Fmr1),ENSMUSG00000…	ENSMUSG00000000028(Cdc45),ENSMUSG00000000056(Narf),ENSMUSG00000000282(Mnt),ENSMUSG00000000326(Comt),ENSMUSG00000000440(Pparg),ENSMUSG00000000631(Myo18a),ENSMUSG00000000673(Haao),ENSMUSG00000000751(Rpa1),ENSMUSG00000000823(Zfp512b),ENSMUSG00000000876(Pxmp4),ENSMUSG00000001036(Epn2),ENSMUSG00000001053(N4bp3),ENSMUSG00000001054(Rmnd5b),ENSMUSG00000001120(Pcbp3),ENSMUSG00000001138(Cnnm3),ENSMUSG00000…
CC	GO:0043227	membrane-bounded organelle	1525	1539	3064	11414	2.47041e-81	8.12073e-78	ENSMUSG00000000001(Gnai3),ENSMUSG00000000078(Klf6),ENSMUSG00000000184(Ccnd2),ENSMUSG00000000247(Lhx2),ENSMUSG00000000275(Trim25),ENSMUSG00000000409(Lck),ENSMUSG00000000555(Itga5),ENSMUSG00000000568(Hnrnpd),ENSMUSG00000000628(Hk2),ENSMUSG00000000708(Kat2b),ENSMUSG00000000730(Dnmt3l),ENSMUSG00000000776(Polr3d),ENSMUSG00000000838(Fmr1),ENSMUSG00000000915(Hip1r),ENSMUSG00000000957(Mmp14),ENSMUSG00000…	ENSMUSG00000000028(Cdc45),ENSMUSG00000000056(Narf),ENSMUSG00000000282(Mnt),ENSMUSG00000000326(Comt),ENSMUSG00000000440(Pparg),ENSMUSG00000000631(Myo18a),ENSMUSG00000000673(Haao),ENSMUSG00000000751(Rpa1),ENSMUSG00000000823(Zfp512b),ENSMUSG00000000876(Pxmp4),ENSMUSG00000001036(Epn2),ENSMUSG00000001053(N4bp3),ENSMUSG00000001054(Rmnd5b),ENSMUSG00000001120(Pcbp3),ENSMUSG00000001138(Cnnm3),ENSMUSG00000…
CC	GO:0043231	intracellular membrane-bounded organelle	1416	1447	2863	10693	2.36518e-68	6.47903e-65	ENSMUSG00000000001(Gnai3),ENSMUSG00000000078(Klf6),ENSMUSG00000000184(Ccnd2),ENSMUSG00000000247(Lhx2),ENSMUSG00000000275(Trim25),ENSMUSG00000000555(Itga5),ENSMUSG00000000568(Hnrnpd),ENSMUSG00000000628(Hk2),ENSMUSG00000000708(Kat2b),ENSMUSG00000000730(Dnmt3l),ENSMUSG00000000776(Polr3d),ENSMUSG00000000838(Fmr1),ENSMUSG00000000915(Hip1r),ENSMUSG00000000957(Mmp14),ENSMUSG00000001052(Sec24b),ENSMUSG00…	ENSMUSG00000000028(Cdc45),ENSMUSG00000000056(Narf),ENSMUSG00000000282(Mnt),ENSMUSG00000000326(Comt),ENSMUSG00000000440(Pparg),ENSMUSG00000000631(Myo18a),ENSMUSG00000000673(Haao),ENSMUSG00000000751(Rpa1),ENSMUSG00000000823(Zfp512b),ENSMUSG00000000876(Pxmp4),ENSMUSG00000001036(Epn2),ENSMUSG00000001054(Rmnd5b),ENSMUSG00000001120(Pcbp3),ENSMUSG00000001138(Cnnm3),ENSMUSG00000001143(Lman2l),ENSMUSG0000…
BP	GO:0002376	immune system process	640	250	890	2438	6.99443e-68	1.64229e-64	ENSMUSG00000000248(Clec2g),ENSMUSG00000000275(Trim25),ENSMUSG00000000409(Lck),ENSMUSG00000000532(Acvr1b),ENSMUSG00000000732(Icosl),ENSMUSG00000000776(Polr3d),ENSMUSG00000000791(Il12rb1),ENSMUSG00000000957(Mmp14),ENSMUSG00000000982(Ccl3),ENSMUSG00000000983(Wfdc18),ENSMUSG00000001123(Lgals9),ENSMUSG00000001166(Oas1c),ENSMUSG00000001168(Oas1h),ENSMUSG00000001288(Rarg),ENSMUSG00000001300(Efnb2),ENSMU…	ENSMUSG00000000440(Pparg),ENSMUSG00000000631(Myo18a),ENSMUSG00000000751(Rpa1),ENSMUSG00000000869(Il4),ENSMUSG00000001366(Fbxo9),ENSMUSG00000001741(Il16),ENSMUSG00000001942(Siae),ENSMUSG00000002308(Cd320),ENSMUSG00000003518(Dusp3),ENSMUSG00000003812(Dnase2a),ENSMUSG00000003882(Il7r),ENSMUSG00000004567(Mcoln1),ENSMUSG00000005102(Eif2ak4),ENSMUSG00000005370(Msh6),ENSMUSG00000005583(Mef2c),ENSMUSG000…
BP	GO:0044237	cellular metabolic process	1387	1408	2795	10388	9.35229e-65	1.92143e-61	ENSMUSG00000000001(Gnai3),ENSMUSG00000000078(Klf6),ENSMUSG00000000184(Ccnd2),ENSMUSG00000000247(Lhx2),ENSMUSG00000000275(Trim25),ENSMUSG00000000409(Lck),ENSMUSG00000000532(Acvr1b),ENSMUSG00000000555(Itga5),ENSMUSG00000000568(Hnrnpd),ENSMUSG00000000628(Hk2),ENSMUSG00000000708(Kat2b),ENSMUSG00000000730(Dnmt3l),ENSMUSG00000000732(Icosl),ENSMUSG00000000776(Polr3d),ENSMUSG00000000791(Il12rb1),ENSMUSG0…	ENSMUSG00000000028(Cdc45),ENSMUSG00000000149(Gna12),ENSMUSG00000000253(Gmpr),ENSMUSG00000000282(Mnt),ENSMUSG00000000326(Comt),ENSMUSG00000000440(Pparg),ENSMUSG00000000673(Haao),ENSMUSG00000000686(Abhd15),ENSMUSG00000000751(Rpa1),ENSMUSG00000000869(Il4),ENSMUSG00000001054(Rmnd5b),ENSMUSG00000001120(Pcbp3),ENSMUSG00000001228(Uhrf1),ENSMUSG00000001366(Fbxo9),ENSMUSG00000001419(Mef2d),ENSMUSG00000001…
BP	GO:0008152	metabolic process	1506	1507	3013	11471	5.08786e-61	9.29157e-58	ENSMUSG00000000001(Gnai3),ENSMUSG00000000078(Klf6),ENSMUSG00000000184(Ccnd2),ENSMUSG00000000247(Lhx2),ENSMUSG00000000275(Trim25),ENSMUSG00000000385(Tmprss2),ENSMUSG00000000409(Lck),ENSMUSG00000000532(Acvr1b),ENSMUSG00000000555(Itga5),ENSMUSG00000000568(Hnrnpd),ENSMUSG00000000628(Hk2),ENSMUSG00000000708(Kat2b),ENSMUSG00000000730(Dnmt3l),ENSMUSG00000000732(Icosl),ENSMUSG00000000776(Polr3d),ENSMUSG0…	ENSMUSG00000000028(Cdc45),ENSMUSG00000000149(Gna12),ENSMUSG00000000253(Gmpr),ENSMUSG00000000282(Mnt),ENSMUSG00000000326(Comt),ENSMUSG00000000440(Pparg),ENSMUSG00000000673(Haao),ENSMUSG00000000686(Abhd15),ENSMUSG00000000751(Rpa1),ENSMUSG00000000869(Il4),ENSMUSG00000001054(Rmnd5b),ENSMUSG00000001120(Pcbp3),ENSMUSG00000001228(Uhrf1),ENSMUSG00000001366(Fbxo9),ENSMUSG00000001419(Mef2d),ENSMUSG00000001…
BP	GO:0006950	response to stress	743	454	1197	3676	3.40446e-60	5.58632e-57	ENSMUSG00000000275(Trim25),ENSMUSG00000000409(Lck),ENSMUSG00000000555(Itga5),ENSMUSG00000000568(Hnrnpd),ENSMUSG00000000628(Hk2),ENSMUSG00000000776(Polr3d),ENSMUSG00000000791(Il12rb1),ENSMUSG00000000957(Mmp14),ENSMUSG00000000982(Ccl3),ENSMUSG00000000983(Wfdc18),ENSMUSG00000001123(Lgals9),ENSMUSG00000001166(Oas1c),ENSMUSG00000001168(Oas1h),ENSMUSG00000001348(Acp5),ENSMUSG00000001441(Npepps),ENSMUSG…	ENSMUSG00000000028(Cdc45),ENSMUSG00000000326(Comt),ENSMUSG00000000440(Pparg),ENSMUSG00000000631(Myo18a),ENSMUSG00000000751(Rpa1),ENSMUSG00000000869(Il4),ENSMUSG00000001228(Uhrf1),ENSMUSG00000001366(Fbxo9),ENSMUSG00000001741(Il16),ENSMUSG00000001761(Smo),ENSMUSG00000001827(Folr1),ENSMUSG00000001930(Vwf),ENSMUSG00000002083(Bbc3),ENSMUSG00000002109(Ddb2),ENSMUSG00000002289(Angptl4),ENSMUSG0000000266…
CC	GO:0005829	cytosol	701	542	1243	3875	3.73871e-60	5.58632e-57	ENSMUSG00000000078(Klf6),ENSMUSG00000000184(Ccnd2),ENSMUSG00000000275(Trim25),ENSMUSG00000000409(Lck),ENSMUSG00000000532(Acvr1b),ENSMUSG00000000568(Hnrnpd),ENSMUSG00000000628(Hk2),ENSMUSG00000000708(Kat2b),ENSMUSG00000000776(Polr3d),ENSMUSG00000000915(Hip1r),ENSMUSG00000000957(Mmp14),ENSMUSG00000000982(Ccl3),ENSMUSG00000001052(Sec24b),ENSMUSG00000001098(Kctd10),ENSMUSG00000001123(Lgals9),ENSMUSG0…	ENSMUSG00000000326(Comt),ENSMUSG00000000440(Pparg),ENSMUSG00000000673(Haao),ENSMUSG00000001054(Rmnd5b),ENSMUSG00000001741(Il16),ENSMUSG00000002257(Def6),ENSMUSG00000002486(Tchp),ENSMUSG00000002731(Prkra),ENSMUSG00000002803(Btbd6),ENSMUSG00000003282(Plag1),ENSMUSG00000003344(Btbd2),ENSMUSG00000003452(Bicd1),ENSMUSG00000003518(Dusp3),ENSMUSG00000003575(Crtc1),ENSMUSG00000003882(Il7r),ENSMUSG0000000…
BP	GO:0071704	organic substance metabolic process	1454	1435	2889	10919	1.36139e-59	1.86465e-56	ENSMUSG00000000001(Gnai3),ENSMUSG00000000078(Klf6),ENSMUSG00000000184(Ccnd2),ENSMUSG00000000247(Lhx2),ENSMUSG00000000275(Trim25),ENSMUSG00000000385(Tmprss2),ENSMUSG00000000409(Lck),ENSMUSG00000000532(Acvr1b),ENSMUSG00000000555(Itga5),ENSMUSG00000000568(Hnrnpd),ENSMUSG00000000628(Hk2),ENSMUSG00000000708(Kat2b),ENSMUSG00000000730(Dnmt3l),ENSMUSG00000000732(Icosl),ENSMUSG00000000776(Polr3d),ENSMUSG0…	ENSMUSG00000000028(Cdc45),ENSMUSG00000000149(Gna12),ENSMUSG00000000253(Gmpr),ENSMUSG00000000282(Mnt),ENSMUSG00000000326(Comt),ENSMUSG00000000440(Pparg),ENSMUSG00000000673(Haao),ENSMUSG00000000686(Abhd15),ENSMUSG00000000751(Rpa1),ENSMUSG00000000869(Il4),ENSMUSG00000001054(Rmnd5b),ENSMUSG00000001120(Pcbp3),ENSMUSG00000001228(Uhrf1),ENSMUSG00000001366(Fbxo9),ENSMUSG00000001419(Mef2d),ENSMUSG00000001…
MF	GO:0005488	binding	1789	1706	3495	13870	2.16281e-59	2.73446e-56	ENSMUSG00000000001(Gnai3),ENSMUSG00000000078(Klf6),ENSMUSG00000000184(Ccnd2),ENSMUSG00000000247(Lhx2),ENSMUSG00000000248(Clec2g),ENSMUSG00000000275(Trim25),ENSMUSG00000000409(Lck),ENSMUSG00000000532(Acvr1b),ENSMUSG00000000555(Itga5),ENSMUSG00000000568(Hnrnpd),ENSMUSG00000000600(Krit1),ENSMUSG00000000628(Hk2),ENSMUSG00000000708(Kat2b),ENSMUSG00000000730(Dnmt3l),ENSMUSG00000000732(Icosl),ENSMUSG000…	ENSMUSG00000000028(Cdc45),ENSMUSG00000000056(Narf),ENSMUSG00000000149(Gna12),ENSMUSG00000000253(Gmpr),ENSMUSG00000000282(Mnt),ENSMUSG00000000326(Comt),ENSMUSG00000000440(Pparg),ENSMUSG00000000631(Myo18a),ENSMUSG00000000673(Haao),ENSMUSG00000000751(Rpa1),ENSMUSG00000000869(Il4),ENSMUSG00000001036(Epn2),ENSMUSG00000001053(N4bp3),ENSMUSG00000001054(Rmnd5b),ENSMUSG00000001120(Pcbp3),ENSMUSG0000000114…
BP	GO:0048519	negative regulation of biological process	909	718	1627	5434	1.54768e-57	1.81697e-54	ENSMUSG00000000001(Gnai3),ENSMUSG00000000184(Ccnd2),ENSMUSG00000000247(Lhx2),ENSMUSG00000000248(Clec2g),ENSMUSG00000000275(Trim25),ENSMUSG00000000409(Lck),ENSMUSG00000000532(Acvr1b),ENSMUSG00000000555(Itga5),ENSMUSG00000000568(Hnrnpd),ENSMUSG00000000600(Krit1),ENSMUSG00000000628(Hk2),ENSMUSG00000000708(Kat2b),ENSMUSG00000000730(Dnmt3l),ENSMUSG00000000838(Fmr1),ENSMUSG00000000915(Hip1r),ENSMUSG000…	ENSMUSG00000000028(Cdc45),ENSMUSG00000000149(Gna12),ENSMUSG00000000282(Mnt),ENSMUSG00000000326(Comt),ENSMUSG00000000440(Pparg),ENSMUSG00000000631(Myo18a),ENSMUSG00000000869(Il4),ENSMUSG00000001036(Epn2),ENSMUSG00000001120(Pcbp3),ENSMUSG00000001227(Sema6b),ENSMUSG00000001228(Uhrf1),ENSMUSG00000001761(Smo),ENSMUSG00000002083(Bbc3),ENSMUSG00000002289(Angptl4),ENSMUSG00000002486(Tchp),ENSMUSG00000002…
BP	GO:0006807	nitrogen compound metabolic process	1322	1289	2611	9745	1.81376e-54	1.9874e-51	ENSMUSG00000000001(Gnai3),ENSMUSG00000000078(Klf6),ENSMUSG00000000184(Ccnd2),ENSMUSG00000000247(Lhx2),ENSMUSG00000000275(Trim25),ENSMUSG00000000385(Tmprss2),ENSMUSG00000000409(Lck),ENSMUSG00000000532(Acvr1b),ENSMUSG00000000555(Itga5),ENSMUSG00000000568(Hnrnpd),ENSMUSG00000000628(Hk2),ENSMUSG00000000708(Kat2b),ENSMUSG00000000730(Dnmt3l),ENSMUSG00000000732(Icosl),ENSMUSG00000000776(Polr3d),ENSMUSG0…	ENSMUSG00000000028(Cdc45),ENSMUSG00000000149(Gna12),ENSMUSG00000000253(Gmpr),ENSMUSG00000000282(Mnt),ENSMUSG00000000326(Comt),ENSMUSG00000000440(Pparg),ENSMUSG00000000673(Haao),ENSMUSG00000000751(Rpa1),ENSMUSG00000000869(Il4),ENSMUSG00000001054(Rmnd5b),ENSMUSG00000001120(Pcbp3),ENSMUSG00000001228(Uhrf1),ENSMUSG00000001366(Fbxo9),ENSMUSG00000001419(Mef2d),ENSMUSG00000001665(Gstt3),ENSMUSG000000017…
BP	GO:0048583	regulation of response to stimulus	719	480	1199	3778	2.35147e-53	2.41554e-50	ENSMUSG00000000001(Gnai3),ENSMUSG00000000275(Trim25),ENSMUSG00000000409(Lck),ENSMUSG00000000532(Acvr1b),ENSMUSG00000000732(Icosl),ENSMUSG00000000776(Polr3d),ENSMUSG00000000791(Il12rb1),ENSMUSG00000000915(Hip1r),ENSMUSG00000000957(Mmp14),ENSMUSG00000000982(Ccl3),ENSMUSG00000001098(Kctd10),ENSMUSG00000001123(Lgals9),ENSMUSG00000001175(Calm1),ENSMUSG00000001300(Efnb2),ENSMUSG00000001348(Acp5),ENSMUS…	ENSMUSG00000000149(Gna12),ENSMUSG00000000282(Mnt),ENSMUSG00000000440(Pparg),ENSMUSG00000000869(Il4),ENSMUSG00000001036(Epn2),ENSMUSG00000001227(Sema6b),ENSMUSG00000001366(Fbxo9),ENSMUSG00000001741(Il16),ENSMUSG00000001761(Smo),ENSMUSG00000001827(Folr1),ENSMUSG00000001995(Sipa1l2),ENSMUSG00000002083(Bbc3),ENSMUSG00000002731(Prkra),ENSMUSG00000003190(Bcl2l12),ENSMUSG00000003452(Bicd1),ENSMUSG000000…
BP	GO:0048523	negative regulation of cellular process	825	671	1496	4969	3.77565e-53	3.65039e-50	ENSMUSG00000000001(Gnai3),ENSMUSG00000000184(Ccnd2),ENSMUSG00000000247(Lhx2),ENSMUSG00000000248(Clec2g),ENSMUSG00000000409(Lck),ENSMUSG00000000532(Acvr1b),ENSMUSG00000000555(Itga5),ENSMUSG00000000568(Hnrnpd),ENSMUSG00000000600(Krit1),ENSMUSG00000000628(Hk2),ENSMUSG00000000708(Kat2b),ENSMUSG00000000730(Dnmt3l),ENSMUSG00000000838(Fmr1),ENSMUSG00000000915(Hip1r),ENSMUSG00000000957(Mmp14),ENSMUSG0000…	ENSMUSG00000000028(Cdc45),ENSMUSG00000000149(Gna12),ENSMUSG00000000282(Mnt),ENSMUSG00000000326(Comt),ENSMUSG00000000440(Pparg),ENSMUSG00000000631(Myo18a),ENSMUSG00000000869(Il4),ENSMUSG00000001036(Epn2),ENSMUSG00000001120(Pcbp3),ENSMUSG00000001227(Sema6b),ENSMUSG00000001228(Uhrf1),ENSMUSG00000001761(Smo),ENSMUSG00000002083(Bbc3),ENSMUSG00000002289(Angptl4),ENSMUSG00000002486(Tchp),ENSMUSG00000002…
BP	GO:0044238	primary metabolic process	1359	1366	2725	10291	4.10116e-53	3.74481e-50	ENSMUSG00000000001(Gnai3),ENSMUSG00000000078(Klf6),ENSMUSG00000000184(Ccnd2),ENSMUSG00000000247(Lhx2),ENSMUSG00000000275(Trim25),ENSMUSG00000000385(Tmprss2),ENSMUSG00000000409(Lck),ENSMUSG00000000532(Acvr1b),ENSMUSG00000000555(Itga5),ENSMUSG00000000568(Hnrnpd),ENSMUSG00000000628(Hk2),ENSMUSG00000000708(Kat2b),ENSMUSG00000000730(Dnmt3l),ENSMUSG00000000732(Icosl),ENSMUSG00000000776(Polr3d),ENSMUSG0…	ENSMUSG00000000028(Cdc45),ENSMUSG00000000149(Gna12),ENSMUSG00000000253(Gmpr),ENSMUSG00000000282(Mnt),ENSMUSG00000000326(Comt),ENSMUSG00000000440(Pparg),ENSMUSG00000000673(Haao),ENSMUSG00000000686(Abhd15),ENSMUSG00000000751(Rpa1),ENSMUSG00000000869(Il4),ENSMUSG00000001054(Rmnd5b),ENSMUSG00000001120(Pcbp3),ENSMUSG00000001228(Uhrf1),ENSMUSG00000001366(Fbxo9),ENSMUSG00000001419(Mef2d),ENSMUSG00000001…
BP	GO:0006955	immune response	436	119	555	1417	1.19647e-51	1.03501e-48	ENSMUSG00000000275(Trim25),ENSMUSG00000000409(Lck),ENSMUSG00000000732(Icosl),ENSMUSG00000000776(Polr3d),ENSMUSG00000000791(Il12rb1),ENSMUSG00000000982(Ccl3),ENSMUSG00000000983(Wfdc18),ENSMUSG00000001123(Lgals9),ENSMUSG00000001168(Oas1h),ENSMUSG00000002413(Braf),ENSMUSG00000002602(Axl),ENSMUSG00000002699(Lcp2),ENSMUSG00000002897(Il17ra),ENSMUSG00000002983(Relb),ENSMUSG00000003283(Hck),ENSMUSG00000…	ENSMUSG00000000440(Pparg),ENSMUSG00000000631(Myo18a),ENSMUSG00000000869(Il4),ENSMUSG00000001366(Fbxo9),ENSMUSG00000003518(Dusp3),ENSMUSG00000003812(Dnase2a),ENSMUSG00000003882(Il7r),ENSMUSG00000004567(Mcoln1),ENSMUSG00000005102(Eif2ak4),ENSMUSG00000005370(Msh6),ENSMUSG00000005583(Mef2c),ENSMUSG00000013707(Tnfaip8l2),ENSMUSG00000014470(Rnf166),ENSMUSG00000016493(Cd46),ENSMUSG00000016933(Plcg1),ENS…
BP	GO:0044260	cellular macromolecule metabolic process	1133	1084	2217	8051	1.94857e-51	1.60133e-48	ENSMUSG00000000078(Klf6),ENSMUSG00000000184(Ccnd2),ENSMUSG00000000247(Lhx2),ENSMUSG00000000275(Trim25),ENSMUSG00000000409(Lck),ENSMUSG00000000532(Acvr1b),ENSMUSG00000000555(Itga5),ENSMUSG00000000568(Hnrnpd),ENSMUSG00000000708(Kat2b),ENSMUSG00000000730(Dnmt3l),ENSMUSG00000000732(Icosl),ENSMUSG00000000776(Polr3d),ENSMUSG00000000791(Il12rb1),ENSMUSG00000000838(Fmr1),ENSMUSG00000000915(Hip1r),ENSMUSG…	ENSMUSG00000000028(Cdc45),ENSMUSG00000000149(Gna12),ENSMUSG00000000282(Mnt),ENSMUSG00000000440(Pparg),ENSMUSG00000000751(Rpa1),ENSMUSG00000000869(Il4),ENSMUSG00000001054(Rmnd5b),ENSMUSG00000001120(Pcbp3),ENSMUSG00000001228(Uhrf1),ENSMUSG00000001366(Fbxo9),ENSMUSG00000001419(Mef2d),ENSMUSG00000001761(Smo),ENSMUSG00000002083(Bbc3),ENSMUSG00000002109(Ddb2),ENSMUSG00000002228(Ppm1j),ENSMUSG0000000232…
BP	GO:0048518	positive regulation of biological process	1021	733	1754	6072	4.531e-51	3.54626e-48	ENSMUSG00000000001(Gnai3),ENSMUSG00000000078(Klf6),ENSMUSG00000000184(Ccnd2),ENSMUSG00000000247(Lhx2),ENSMUSG00000000275(Trim25),ENSMUSG00000000385(Tmprss2),ENSMUSG00000000409(Lck),ENSMUSG00000000532(Acvr1b),ENSMUSG00000000555(Itga5),ENSMUSG00000000568(Hnrnpd),ENSMUSG00000000628(Hk2),ENSMUSG00000000708(Kat2b),ENSMUSG00000000730(Dnmt3l),ENSMUSG00000000732(Icosl),ENSMUSG00000000776(Polr3d),ENSMUSG0…	ENSMUSG00000000326(Comt),ENSMUSG00000000440(Pparg),ENSMUSG00000000631(Myo18a),ENSMUSG00000000751(Rpa1),ENSMUSG00000000869(Il4),ENSMUSG00000001036(Epn2),ENSMUSG00000001227(Sema6b),ENSMUSG00000001228(Uhrf1),ENSMUSG00000001419(Mef2d),ENSMUSG00000001482(Def8),ENSMUSG00000001741(Il16),ENSMUSG00000001761(Smo),ENSMUSG00000002055(Spag5),ENSMUSG00000002083(Bbc3),ENSMUSG00000002274(Metrn),ENSMUSG0000000228…
BP	GO:0019222	regulation of metabolic process	1054	867	1921	6826	1.41081e-48	1.054e-45	ENSMUSG00000000001(Gnai3),ENSMUSG00000000078(Klf6),ENSMUSG00000000184(Ccnd2),ENSMUSG00000000247(Lhx2),ENSMUSG00000000275(Trim25),ENSMUSG00000000409(Lck),ENSMUSG00000000532(Acvr1b),ENSMUSG00000000555(Itga5),ENSMUSG00000000568(Hnrnpd),ENSMUSG00000000628(Hk2),ENSMUSG00000000708(Kat2b),ENSMUSG00000000730(Dnmt3l),ENSMUSG00000000732(Icosl),ENSMUSG00000000776(Polr3d),ENSMUSG00000000791(Il12rb1),ENSMUSG0…	ENSMUSG00000000028(Cdc45),ENSMUSG00000000149(Gna12),ENSMUSG00000000282(Mnt),ENSMUSG00000000326(Comt),ENSMUSG00000000440(Pparg),ENSMUSG00000000869(Il4),ENSMUSG00000001120(Pcbp3),ENSMUSG00000001228(Uhrf1),ENSMUSG00000001419(Mef2d),ENSMUSG00000001741(Il16),ENSMUSG00000001761(Smo),ENSMUSG00000002083(Bbc3),ENSMUSG00000002289(Angptl4),ENSMUSG00000002308(Cd320),ENSMUSG00000002409(Dyrk1b),ENSMUSG00000002…
MF	GO:0005515	protein binding	1332	1075	2407	8968	3.69125e-48	2.6378e-45	ENSMUSG00000000001(Gnai3),ENSMUSG00000000184(Ccnd2),ENSMUSG00000000247(Lhx2),ENSMUSG00000000248(Clec2g),ENSMUSG00000000275(Trim25),ENSMUSG00000000409(Lck),ENSMUSG00000000532(Acvr1b),ENSMUSG00000000555(Itga5),ENSMUSG00000000568(Hnrnpd),ENSMUSG00000000600(Krit1),ENSMUSG00000000628(Hk2),ENSMUSG00000000708(Kat2b),ENSMUSG00000000730(Dnmt3l),ENSMUSG00000000732(Icosl),ENSMUSG00000000791(Il12rb1),ENSMUSG…	ENSMUSG00000000056(Narf),ENSMUSG00000000149(Gna12),ENSMUSG00000000282(Mnt),ENSMUSG00000000440(Pparg),ENSMUSG00000000631(Myo18a),ENSMUSG00000000869(Il4),ENSMUSG00000001036(Epn2),ENSMUSG00000001053(N4bp3),ENSMUSG00000001227(Sema6b),ENSMUSG00000001228(Uhrf1),ENSMUSG00000001419(Mef2d),ENSMUSG00000001482(Def8),ENSMUSG00000001741(Il16),ENSMUSG00000001761(Smo),ENSMUSG00000001930(Vwf),ENSMUSG00000002031(…
BP	GO:0043170	macromolecule metabolic process	1327	1182	2509	9430	2.1777e-47	1.49136e-44	ENSMUSG00000000078(Klf6),ENSMUSG00000000184(Ccnd2),ENSMUSG00000000247(Lhx2),ENSMUSG00000000275(Trim25),ENSMUSG00000000385(Tmprss2),ENSMUSG00000000409(Lck),ENSMUSG00000000532(Acvr1b),ENSMUSG00000000555(Itga5),ENSMUSG00000000568(Hnrnpd),ENSMUSG00000000708(Kat2b),ENSMUSG00000000730(Dnmt3l),ENSMUSG00000000732(Icosl),ENSMUSG00000000776(Polr3d),ENSMUSG00000000791(Il12rb1),ENSMUSG00000000838(Fmr1),ENSMU…	ENSMUSG00000000028(Cdc45),ENSMUSG00000000149(Gna12),ENSMUSG00000000282(Mnt),ENSMUSG00000000440(Pparg),ENSMUSG00000000751(Rpa1),ENSMUSG00000000869(Il4),ENSMUSG00000001054(Rmnd5b),ENSMUSG00000001120(Pcbp3),ENSMUSG00000001228(Uhrf1),ENSMUSG00000001366(Fbxo9),ENSMUSG00000001419(Mef2d),ENSMUSG00000001741(Il16),ENSMUSG00000001761(Smo),ENSMUSG00000001865(Cpa3),ENSMUSG00000002083(Bbc3),ENSMUSG00000002109…
BP	GO:0006952	defense response	459	119	578	1541	8.90142e-47	5.85215e-44	ENSMUSG00000000275(Trim25),ENSMUSG00000000409(Lck),ENSMUSG00000000776(Polr3d),ENSMUSG00000000791(Il12rb1),ENSMUSG00000000982(Ccl3),ENSMUSG00000000983(Wfdc18),ENSMUSG00000001123(Lgals9),ENSMUSG00000001166(Oas1c),ENSMUSG00000001168(Oas1h),ENSMUSG00000001348(Acp5),ENSMUSG00000002227(Mov10),ENSMUSG00000002602(Axl),ENSMUSG00000002897(Il17ra),ENSMUSG00000002983(Relb),ENSMUSG00000003283(Hck),ENSMUSG0000…	ENSMUSG00000000440(Pparg),ENSMUSG00000000631(Myo18a),ENSMUSG00000000869(Il4),ENSMUSG00000001366(Fbxo9),ENSMUSG00000001741(Il16),ENSMUSG00000001761(Smo),ENSMUSG00000003882(Il7r),ENSMUSG00000004768(Rab23),ENSMUSG00000005102(Eif2ak4),ENSMUSG00000005583(Mef2c),ENSMUSG00000005951(Shpk),ENSMUSG00000006344(Ggt5),ENSMUSG00000008845(Cd163),ENSMUSG00000010047(Hyal2),ENSMUSG00000010051(Hyal1),ENSMUSG0000001…
BP	GO:0048522	positive regulation of cellular process	920	692	1612	5558	1.08649e-46	6.8683e-44	ENSMUSG00000000001(Gnai3),ENSMUSG00000000078(Klf6),ENSMUSG00000000184(Ccnd2),ENSMUSG00000000247(Lhx2),ENSMUSG00000000275(Trim25),ENSMUSG00000000409(Lck),ENSMUSG00000000532(Acvr1b),ENSMUSG00000000555(Itga5),ENSMUSG00000000568(Hnrnpd),ENSMUSG00000000628(Hk2),ENSMUSG00000000708(Kat2b),ENSMUSG00000000730(Dnmt3l),ENSMUSG00000000732(Icosl),ENSMUSG00000000791(Il12rb1),ENSMUSG00000000915(Hip1r),ENSMUSG00…	ENSMUSG00000000326(Comt),ENSMUSG00000000440(Pparg),ENSMUSG00000000631(Myo18a),ENSMUSG00000000751(Rpa1),ENSMUSG00000000869(Il4),ENSMUSG00000001036(Epn2),ENSMUSG00000001227(Sema6b),ENSMUSG00000001228(Uhrf1),ENSMUSG00000001419(Mef2d),ENSMUSG00000001482(Def8),ENSMUSG00000001761(Smo),ENSMUSG00000002055(Spag5),ENSMUSG00000002083(Bbc3),ENSMUSG00000002274(Metrn),ENSMUSG00000002308(Cd320),ENSMUSG000000024…
BP	GO:0002682	regulation of immune system process	361	139	500	1277	2.70853e-46	1.64879e-43	ENSMUSG00000000248(Clec2g),ENSMUSG00000000409(Lck),ENSMUSG00000000532(Acvr1b),ENSMUSG00000000732(Icosl),ENSMUSG00000000776(Polr3d),ENSMUSG00000000791(Il12rb1),ENSMUSG00000000957(Mmp14),ENSMUSG00000000982(Ccl3),ENSMUSG00000001123(Lgals9),ENSMUSG00000001288(Rarg),ENSMUSG00000001300(Efnb2),ENSMUSG00000001786(Fbxo7),ENSMUSG00000002111(Spi1),ENSMUSG00000002413(Braf),ENSMUSG00000002602(Axl),ENSMUSG0000…	ENSMUSG00000000440(Pparg),ENSMUSG00000000631(Myo18a),ENSMUSG00000000869(Il4),ENSMUSG00000001942(Siae),ENSMUSG00000002308(Cd320),ENSMUSG00000003518(Dusp3),ENSMUSG00000003812(Dnase2a),ENSMUSG00000003882(Il7r),ENSMUSG00000005102(Eif2ak4),ENSMUSG00000005583(Mef2c),ENSMUSG00000005951(Shpk),ENSMUSG00000013707(Tnfaip8l2),ENSMUSG00000014158(Trpv4),ENSMUSG00000016493(Cd46),ENSMUSG00000016933(Plcg1),ENSMUS…
BP	GO:0044419	interspecies interaction between organisms	458	136	594	1602	2.85361e-46	1.67507e-43	ENSMUSG00000000204(Slfn4),ENSMUSG00000000275(Trim25),ENSMUSG00000000385(Tmprss2),ENSMUSG00000000409(Lck),ENSMUSG00000000682(Cd52),ENSMUSG00000000776(Polr3d),ENSMUSG00000000791(Il12rb1),ENSMUSG00000000982(Ccl3),ENSMUSG00000000983(Wfdc18),ENSMUSG00000001123(Lgals9),ENSMUSG00000001166(Oas1c),ENSMUSG00000001168(Oas1h),ENSMUSG00000001348(Acp5),ENSMUSG00000002227(Mov10),ENSMUSG00000002602(Axl),ENSMUSG0…	ENSMUSG00000000326(Comt),ENSMUSG00000000440(Pparg),ENSMUSG00000000631(Myo18a),ENSMUSG00000000869(Il4),ENSMUSG00000001366(Fbxo9),ENSMUSG00000003452(Bicd1),ENSMUSG00000003882(Il7r),ENSMUSG00000004798(Ulk2),ENSMUSG00000005102(Eif2ak4),ENSMUSG00000005534(Insr),ENSMUSG00000005583(Mef2c),ENSMUSG00000005718(Tfap4),ENSMUSG00000005951(Shpk),ENSMUSG00000006235(Epor),ENSMUSG00000006344(Ggt5),ENSMUSG00000006…
BP	GO:0051707	response to other organism	421	111	532	1390	6.88326e-46	3.90114e-43	ENSMUSG00000000204(Slfn4),ENSMUSG00000000275(Trim25),ENSMUSG00000000409(Lck),ENSMUSG00000000682(Cd52),ENSMUSG00000000776(Polr3d),ENSMUSG00000000791(Il12rb1),ENSMUSG00000000982(Ccl3),ENSMUSG00000000983(Wfdc18),ENSMUSG00000001123(Lgals9),ENSMUSG00000001166(Oas1c),ENSMUSG00000001168(Oas1h),ENSMUSG00000001348(Acp5),ENSMUSG00000002227(Mov10),ENSMUSG00000002602(Axl),ENSMUSG00000002658(Gtf2f1),ENSMUSG00…	ENSMUSG00000000326(Comt),ENSMUSG00000000440(Pparg),ENSMUSG00000000631(Myo18a),ENSMUSG00000000869(Il4),ENSMUSG00000001366(Fbxo9),ENSMUSG00000003882(Il7r),ENSMUSG00000005102(Eif2ak4),ENSMUSG00000005583(Mef2c),ENSMUSG00000005951(Shpk),ENSMUSG00000006344(Ggt5),ENSMUSG00000006728(Cdk4),ENSMUSG00000008855(Hdac5),ENSMUSG00000010047(Hyal2),ENSMUSG00000010051(Hyal1),ENSMUSG00000010054(Tusc2),ENSMUSG000000…
BP	GO:0043207	response to external biotic stimulus	421	111	532	1393	1.44904e-45	7.93881e-43	ENSMUSG00000000204(Slfn4),ENSMUSG00000000275(Trim25),ENSMUSG00000000409(Lck),ENSMUSG00000000682(Cd52),ENSMUSG00000000776(Polr3d),ENSMUSG00000000791(Il12rb1),ENSMUSG00000000982(Ccl3),ENSMUSG00000000983(Wfdc18),ENSMUSG00000001123(Lgals9),ENSMUSG00000001166(Oas1c),ENSMUSG00000001168(Oas1h),ENSMUSG00000001348(Acp5),ENSMUSG00000002227(Mov10),ENSMUSG00000002602(Axl),ENSMUSG00000002658(Gtf2f1),ENSMUSG00…	ENSMUSG00000000326(Comt),ENSMUSG00000000440(Pparg),ENSMUSG00000000631(Myo18a),ENSMUSG00000000869(Il4),ENSMUSG00000001366(Fbxo9),ENSMUSG00000003882(Il7r),ENSMUSG00000005102(Eif2ak4),ENSMUSG00000005583(Mef2c),ENSMUSG00000005951(Shpk),ENSMUSG00000006344(Ggt5),ENSMUSG00000006728(Cdk4),ENSMUSG00000008855(Hdac5),ENSMUSG00000010047(Hyal2),ENSMUSG00000010051(Hyal1),ENSMUSG00000010054(Tusc2),ENSMUSG000000…
BP	GO:0009893	positive regulation of metabolic process	696	481	1177	3814	3.38228e-45	1.79326e-42	ENSMUSG00000000001(Gnai3),ENSMUSG00000000078(Klf6),ENSMUSG00000000184(Ccnd2),ENSMUSG00000000247(Lhx2),ENSMUSG00000000275(Trim25),ENSMUSG00000000409(Lck),ENSMUSG00000000532(Acvr1b),ENSMUSG00000000555(Itga5),ENSMUSG00000000568(Hnrnpd),ENSMUSG00000000628(Hk2),ENSMUSG00000000708(Kat2b),ENSMUSG00000000730(Dnmt3l),ENSMUSG00000000732(Icosl),ENSMUSG00000000776(Polr3d),ENSMUSG00000000791(Il12rb1),ENSMUSG0…	ENSMUSG00000000326(Comt),ENSMUSG00000000440(Pparg),ENSMUSG00000000869(Il4),ENSMUSG00000001228(Uhrf1),ENSMUSG00000001419(Mef2d),ENSMUSG00000001741(Il16),ENSMUSG00000001761(Smo),ENSMUSG00000002083(Bbc3),ENSMUSG00000002289(Angptl4),ENSMUSG00000002409(Dyrk1b),ENSMUSG00000002617(Zfp40),ENSMUSG00000002625(Akap8l),ENSMUSG00000002968(Med25),ENSMUSG00000003190(Bcl2l12),ENSMUSG00000003282(Plag1),ENSMUSG000…
BP	GO:0034097	response to cytokine	309	80	389	919	4.20368e-45	2.15911e-42	ENSMUSG00000000275(Trim25),ENSMUSG00000000628(Hk2),ENSMUSG00000000791(Il12rb1),ENSMUSG00000000982(Ccl3),ENSMUSG00000001288(Rarg),ENSMUSG00000001348(Acp5),ENSMUSG00000001707(Eef1e1),ENSMUSG00000002111(Spi1),ENSMUSG00000002602(Axl),ENSMUSG00000002897(Il17ra),ENSMUSG00000002983(Relb),ENSMUSG00000003206(Ebi3),ENSMUSG00000003308(Keap1),ENSMUSG00000003382(Etv3),ENSMUSG00000004040(Stat3),ENSMUSG00000004…	ENSMUSG00000000440(Pparg),ENSMUSG00000000631(Myo18a),ENSMUSG00000002870(Mcm2),ENSMUSG00000003882(Il7r),ENSMUSG00000004071(Cdip1),ENSMUSG00000005534(Insr),ENSMUSG00000005951(Shpk),ENSMUSG00000006235(Epor),ENSMUSG00000006344(Ggt5),ENSMUSG00000006728(Cdk4),ENSMUSG00000010047(Hyal2),ENSMUSG00000010051(Hyal1),ENSMUSG00000013483(Card14),ENSMUSG00000015337(Endog),ENSMUSG00000015766(Eps8),ENSMUSG00000017…
CC	GO:0005634	nucleus	1015	966	1981	7197	9.10473e-45	4.53471e-42	ENSMUSG00000000078(Klf6),ENSMUSG00000000184(Ccnd2),ENSMUSG00000000247(Lhx2),ENSMUSG00000000275(Trim25),ENSMUSG00000000568(Hnrnpd),ENSMUSG00000000708(Kat2b),ENSMUSG00000000730(Dnmt3l),ENSMUSG00000000776(Polr3d),ENSMUSG00000000838(Fmr1),ENSMUSG00000000957(Mmp14),ENSMUSG00000001089(Luzp1),ENSMUSG00000001098(Kctd10),ENSMUSG00000001123(Lgals9),ENSMUSG00000001156(Mxd1),ENSMUSG00000001166(Oas1c),ENSMUSG…	ENSMUSG00000000028(Cdc45),ENSMUSG00000000056(Narf),ENSMUSG00000000282(Mnt),ENSMUSG00000000440(Pparg),ENSMUSG00000000751(Rpa1),ENSMUSG00000000823(Zfp512b),ENSMUSG00000001054(Rmnd5b),ENSMUSG00000001120(Pcbp3),ENSMUSG00000001228(Uhrf1),ENSMUSG00000001419(Mef2d),ENSMUSG00000001741(Il16),ENSMUSG00000001761(Smo),ENSMUSG00000001827(Folr1),ENSMUSG00000001962(Fam50a),ENSMUSG00000002109(Ddb2),ENSMUSG000000…
BP	GO:0009607	response to biotic stimulus	424	114	538	1425	2.25428e-44	1.08974e-41	ENSMUSG00000000204(Slfn4),ENSMUSG00000000275(Trim25),ENSMUSG00000000409(Lck),ENSMUSG00000000682(Cd52),ENSMUSG00000000776(Polr3d),ENSMUSG00000000791(Il12rb1),ENSMUSG00000000982(Ccl3),ENSMUSG00000000983(Wfdc18),ENSMUSG00000001123(Lgals9),ENSMUSG00000001166(Oas1c),ENSMUSG00000001168(Oas1h),ENSMUSG00000001348(Acp5),ENSMUSG00000002227(Mov10),ENSMUSG00000002602(Axl),ENSMUSG00000002658(Gtf2f1),ENSMUSG00…	ENSMUSG00000000326(Comt),ENSMUSG00000000440(Pparg),ENSMUSG00000000631(Myo18a),ENSMUSG00000000869(Il4),ENSMUSG00000001366(Fbxo9),ENSMUSG00000001761(Smo),ENSMUSG00000003882(Il7r),ENSMUSG00000005102(Eif2ak4),ENSMUSG00000005583(Mef2c),ENSMUSG00000005951(Shpk),ENSMUSG00000006344(Ggt5),ENSMUSG00000006728(Cdk4),ENSMUSG00000008855(Hdac5),ENSMUSG00000010047(Hyal2),ENSMUSG00000010051(Hyal1),ENSMUSG00000010…
BP	GO:0035556	intracellular signal transduction	491	327	818	2449	1.44922e-43	6.80555e-41	ENSMUSG00000000275(Trim25),ENSMUSG00000000409(Lck),ENSMUSG00000000982(Ccl3),ENSMUSG00000001098(Kctd10),ENSMUSG00000001175(Calm1),ENSMUSG00000001440(Kpnb1),ENSMUSG00000001630(Stk38l),ENSMUSG00000001707(Eef1e1),ENSMUSG00000002233(Rhoc),ENSMUSG00000002413(Braf),ENSMUSG00000002602(Axl),ENSMUSG00000002699(Lcp2),ENSMUSG00000002983(Relb),ENSMUSG00000002997(Prkar2b),ENSMUSG00000003119(Cdk12),ENSMUSG00000…	ENSMUSG00000000149(Gna12),ENSMUSG00000001366(Fbxo9),ENSMUSG00000001482(Def8),ENSMUSG00000001761(Smo),ENSMUSG00000001995(Sipa1l2),ENSMUSG00000002083(Bbc3),ENSMUSG00000002731(Prkra),ENSMUSG00000003190(Bcl2l12),ENSMUSG00000003518(Dusp3),ENSMUSG00000004071(Cdip1),ENSMUSG00000004099(Dnmt1),ENSMUSG00000004567(Mcoln1),ENSMUSG00000004633(Chn2),ENSMUSG00000005045(Chd5),ENSMUSG00000005370(Msh6),ENSMUSG0000…
BP	GO:0031323	regulation of cellular metabolic process	936	801	1737	6154	6.19405e-43	2.82793e-40	ENSMUSG00000000001(Gnai3),ENSMUSG00000000078(Klf6),ENSMUSG00000000184(Ccnd2),ENSMUSG00000000247(Lhx2),ENSMUSG00000000275(Trim25),ENSMUSG00000000409(Lck),ENSMUSG00000000532(Acvr1b),ENSMUSG00000000555(Itga5),ENSMUSG00000000568(Hnrnpd),ENSMUSG00000000628(Hk2),ENSMUSG00000000708(Kat2b),ENSMUSG00000000730(Dnmt3l),ENSMUSG00000000838(Fmr1),ENSMUSG00000000915(Hip1r),ENSMUSG00000000957(Mmp14),ENSMUSG00000…	ENSMUSG00000000028(Cdc45),ENSMUSG00000000149(Gna12),ENSMUSG00000000282(Mnt),ENSMUSG00000000326(Comt),ENSMUSG00000000440(Pparg),ENSMUSG00000000869(Il4),ENSMUSG00000001120(Pcbp3),ENSMUSG00000001228(Uhrf1),ENSMUSG00000001419(Mef2d),ENSMUSG00000001761(Smo),ENSMUSG00000002083(Bbc3),ENSMUSG00000002409(Dyrk1b),ENSMUSG00000002486(Tchp),ENSMUSG00000002617(Zfp40),ENSMUSG00000002625(Akap8l),ENSMUSG000000029…
BP	GO:0009605	response to external stimulus	615	282	897	2758	7.67213e-43	3.40809e-40	ENSMUSG00000000204(Slfn4),ENSMUSG00000000247(Lhx2),ENSMUSG00000000275(Trim25),ENSMUSG00000000409(Lck),ENSMUSG00000000682(Cd52),ENSMUSG00000000776(Polr3d),ENSMUSG00000000791(Il12rb1),ENSMUSG00000000957(Mmp14),ENSMUSG00000000982(Ccl3),ENSMUSG00000000983(Wfdc18),ENSMUSG00000001123(Lgals9),ENSMUSG00000001166(Oas1c),ENSMUSG00000001168(Oas1h),ENSMUSG00000001300(Efnb2),ENSMUSG00000001348(Acp5),ENSMUSG00…	ENSMUSG00000000326(Comt),ENSMUSG00000000440(Pparg),ENSMUSG00000000631(Myo18a),ENSMUSG00000000869(Il4),ENSMUSG00000001227(Sema6b),ENSMUSG00000001366(Fbxo9),ENSMUSG00000001741(Il16),ENSMUSG00000001761(Smo),ENSMUSG00000001827(Folr1),ENSMUSG00000002289(Angptl4),ENSMUSG00000003518(Dusp3),ENSMUSG00000003575(Crtc1),ENSMUSG00000003882(Il7r),ENSMUSG00000004151(Etv1),ENSMUSG00000004798(Ulk2),ENSMUSG0000000…
MF	GO:0043167	ion binding	819	910	1729	6127	8.3503e-43	3.61173e-40	ENSMUSG00000000001(Gnai3),ENSMUSG00000000247(Lhx2),ENSMUSG00000000275(Trim25),ENSMUSG00000000409(Lck),ENSMUSG00000000532(Acvr1b),ENSMUSG00000000555(Itga5),ENSMUSG00000000600(Krit1),ENSMUSG00000000628(Hk2),ENSMUSG00000000730(Dnmt3l),ENSMUSG00000000915(Hip1r),ENSMUSG00000000957(Mmp14),ENSMUSG00000001052(Sec24b),ENSMUSG00000001175(Calm1),ENSMUSG00000001288(Rarg),ENSMUSG00000001348(Acp5),ENSMUSG00000…	ENSMUSG00000000149(Gna12),ENSMUSG00000000253(Gmpr),ENSMUSG00000000326(Comt),ENSMUSG00000000440(Pparg),ENSMUSG00000000631(Myo18a),ENSMUSG00000000673(Haao),ENSMUSG00000000751(Rpa1),ENSMUSG00000001036(Epn2),ENSMUSG00000001054(Rmnd5b),ENSMUSG00000001143(Lman2l),ENSMUSG00000001228(Uhrf1),ENSMUSG00000001436(Slc19a1),ENSMUSG00000001482(Def8),ENSMUSG00000001755(Coasy),ENSMUSG00000001827(Folr1),ENSMUSG000…
BP	GO:0010604	positive regulation of macromolecule metabolic process	654	435	1089	3518	6.66332e-42	2.80816e-39	ENSMUSG00000000078(Klf6),ENSMUSG00000000184(Ccnd2),ENSMUSG00000000247(Lhx2),ENSMUSG00000000275(Trim25),ENSMUSG00000000409(Lck),ENSMUSG00000000532(Acvr1b),ENSMUSG00000000555(Itga5),ENSMUSG00000000568(Hnrnpd),ENSMUSG00000000708(Kat2b),ENSMUSG00000000730(Dnmt3l),ENSMUSG00000000732(Icosl),ENSMUSG00000000776(Polr3d),ENSMUSG00000000791(Il12rb1),ENSMUSG00000000915(Hip1r),ENSMUSG00000000957(Mmp14),ENSMUS…	ENSMUSG00000000440(Pparg),ENSMUSG00000000869(Il4),ENSMUSG00000001228(Uhrf1),ENSMUSG00000001419(Mef2d),ENSMUSG00000001741(Il16),ENSMUSG00000001761(Smo),ENSMUSG00000002083(Bbc3),ENSMUSG00000002409(Dyrk1b),ENSMUSG00000002617(Zfp40),ENSMUSG00000002625(Akap8l),ENSMUSG00000002968(Med25),ENSMUSG00000003190(Bcl2l12),ENSMUSG00000003282(Plag1),ENSMUSG00000003575(Crtc1),ENSMUSG00000003882(Il7r),ENSMUSG00000…
BP	GO:0065009	regulation of molecular function	570	395	965	3039	1.6701e-41	6.86243e-39	ENSMUSG00000000001(Gnai3),ENSMUSG00000000184(Ccnd2),ENSMUSG00000000247(Lhx2),ENSMUSG00000000275(Trim25),ENSMUSG00000000409(Lck),ENSMUSG00000000568(Hnrnpd),ENSMUSG00000000600(Krit1),ENSMUSG00000000708(Kat2b),ENSMUSG00000000730(Dnmt3l),ENSMUSG00000000915(Hip1r),ENSMUSG00000000982(Ccl3),ENSMUSG00000000983(Wfdc18),ENSMUSG00000001123(Lgals9),ENSMUSG00000001166(Oas1c),ENSMUSG00000001168(Oas1h),ENSMUSG0…	ENSMUSG00000000440(Pparg),ENSMUSG00000000869(Il4),ENSMUSG00000001761(Smo),ENSMUSG00000001995(Sipa1l2),ENSMUSG00000002083(Bbc3),ENSMUSG00000002289(Angptl4),ENSMUSG00000002731(Prkra),ENSMUSG00000002870(Mcm2),ENSMUSG00000002968(Med25),ENSMUSG00000003134(Tbc1d8),ENSMUSG00000003190(Bcl2l12),ENSMUSG00000003421(Nosip),ENSMUSG00000003452(Bicd1),ENSMUSG00000003518(Dusp3),ENSMUSG00000003575(Crtc1),ENSMUSG0…
BP	GO:0071310	cellular response to organic substance	523	276	799	2413	7.13409e-41	2.82145e-38	ENSMUSG00000000001(Gnai3),ENSMUSG00000000275(Trim25),ENSMUSG00000000532(Acvr1b),ENSMUSG00000000568(Hnrnpd),ENSMUSG00000000628(Hk2),ENSMUSG00000000708(Kat2b),ENSMUSG00000000791(Il12rb1),ENSMUSG00000000982(Ccl3),ENSMUSG00000001248(Gramd1a),ENSMUSG00000001288(Rarg),ENSMUSG00000001707(Eef1e1),ENSMUSG00000002111(Spi1),ENSMUSG00000002307(Daxx),ENSMUSG00000002413(Braf),ENSMUSG00000002602(Axl),ENSMUSG000…	ENSMUSG00000000440(Pparg),ENSMUSG00000000631(Myo18a),ENSMUSG00000000869(Il4),ENSMUSG00000001036(Epn2),ENSMUSG00000001761(Smo),ENSMUSG00000001827(Folr1),ENSMUSG00000002870(Mcm2),ENSMUSG00000003378(Grik5),ENSMUSG00000003518(Dusp3),ENSMUSG00000003882(Il7r),ENSMUSG00000004071(Cdip1),ENSMUSG00000004099(Dnmt1),ENSMUSG00000004347(Pde1c),ENSMUSG00000005102(Eif2ak4),ENSMUSG00000005374(Tbl2),ENSMUSG0000000…
BP	GO:0060255	regulation of macromolecule metabolic process	996	779	1775	6357	7.20984e-41	2.82145e-38	ENSMUSG00000000078(Klf6),ENSMUSG00000000184(Ccnd2),ENSMUSG00000000247(Lhx2),ENSMUSG00000000275(Trim25),ENSMUSG00000000409(Lck),ENSMUSG00000000532(Acvr1b),ENSMUSG00000000555(Itga5),ENSMUSG00000000568(Hnrnpd),ENSMUSG00000000708(Kat2b),ENSMUSG00000000730(Dnmt3l),ENSMUSG00000000732(Icosl),ENSMUSG00000000776(Polr3d),ENSMUSG00000000791(Il12rb1),ENSMUSG00000000838(Fmr1),ENSMUSG00000000915(Hip1r),ENSMUSG…	ENSMUSG00000000028(Cdc45),ENSMUSG00000000149(Gna12),ENSMUSG00000000282(Mnt),ENSMUSG00000000440(Pparg),ENSMUSG00000000869(Il4),ENSMUSG00000001120(Pcbp3),ENSMUSG00000001228(Uhrf1),ENSMUSG00000001419(Mef2d),ENSMUSG00000001741(Il16),ENSMUSG00000001761(Smo),ENSMUSG00000002083(Bbc3),ENSMUSG00000002409(Dyrk1b),ENSMUSG00000002486(Tchp),ENSMUSG00000002617(Zfp40),ENSMUSG00000002625(Akap8l),ENSMUSG000000027…
BP	GO:0070887	cellular response to chemical stimulus	616	347	963	3046	1.61101e-40	6.15781e-38	ENSMUSG00000000001(Gnai3),ENSMUSG00000000275(Trim25),ENSMUSG00000000532(Acvr1b),ENSMUSG00000000568(Hnrnpd),ENSMUSG00000000628(Hk2),ENSMUSG00000000708(Kat2b),ENSMUSG00000000791(Il12rb1),ENSMUSG00000000982(Ccl3),ENSMUSG00000001248(Gramd1a),ENSMUSG00000001288(Rarg),ENSMUSG00000001441(Npepps),ENSMUSG00000001663(Gstt1),ENSMUSG00000001707(Eef1e1),ENSMUSG00000001786(Fbxo7),ENSMUSG00000002111(Spi1),ENSMU…	ENSMUSG00000000440(Pparg),ENSMUSG00000000631(Myo18a),ENSMUSG00000000869(Il4),ENSMUSG00000001036(Epn2),ENSMUSG00000001741(Il16),ENSMUSG00000001761(Smo),ENSMUSG00000001827(Folr1),ENSMUSG00000002731(Prkra),ENSMUSG00000002870(Mcm2),ENSMUSG00000003378(Grik5),ENSMUSG00000003518(Dusp3),ENSMUSG00000003882(Il7r),ENSMUSG00000004032(Gstm5),ENSMUSG00000004071(Cdip1),ENSMUSG00000004099(Dnmt1),ENSMUSG000000043…
BP	GO:0006464	cellular protein modification process	651	511	1162	3844	9.97962e-40	3.645e-37	ENSMUSG00000000184(Ccnd2),ENSMUSG00000000275(Trim25),ENSMUSG00000000409(Lck),ENSMUSG00000000532(Acvr1b),ENSMUSG00000000555(Itga5),ENSMUSG00000000708(Kat2b),ENSMUSG00000000791(Il12rb1),ENSMUSG00000000982(Ccl3),ENSMUSG00000001098(Kctd10),ENSMUSG00000001123(Lgals9),ENSMUSG00000001175(Calm1),ENSMUSG00000001630(Stk38l),ENSMUSG00000001632(Brpf1),ENSMUSG00000001785(Pwp1),ENSMUSG00000001786(Fbxo7),ENSMUS…	ENSMUSG00000000869(Il4),ENSMUSG00000001054(Rmnd5b),ENSMUSG00000001228(Uhrf1),ENSMUSG00000001366(Fbxo9),ENSMUSG00000002109(Ddb2),ENSMUSG00000002228(Ppm1j),ENSMUSG00000002329(Mdp1),ENSMUSG00000002409(Dyrk1b),ENSMUSG00000002625(Akap8l),ENSMUSG00000002731(Prkra),ENSMUSG00000003346(Abhd17a),ENSMUSG00000003421(Nosip),ENSMUSG00000003518(Dusp3),ENSMUSG00000004099(Dnmt1),ENSMUSG00000004530(Coro1c),ENSMUSG…
BP	GO:0036211	protein modification process	651	511	1162	3844	9.97962e-40	3.645e-37	ENSMUSG00000000184(Ccnd2),ENSMUSG00000000275(Trim25),ENSMUSG00000000409(Lck),ENSMUSG00000000532(Acvr1b),ENSMUSG00000000555(Itga5),ENSMUSG00000000708(Kat2b),ENSMUSG00000000791(Il12rb1),ENSMUSG00000000982(Ccl3),ENSMUSG00000001098(Kctd10),ENSMUSG00000001123(Lgals9),ENSMUSG00000001175(Calm1),ENSMUSG00000001630(Stk38l),ENSMUSG00000001632(Brpf1),ENSMUSG00000001785(Pwp1),ENSMUSG00000001786(Fbxo7),ENSMUS…	ENSMUSG00000000869(Il4),ENSMUSG00000001054(Rmnd5b),ENSMUSG00000001228(Uhrf1),ENSMUSG00000001366(Fbxo9),ENSMUSG00000002109(Ddb2),ENSMUSG00000002228(Ppm1j),ENSMUSG00000002329(Mdp1),ENSMUSG00000002409(Dyrk1b),ENSMUSG00000002625(Akap8l),ENSMUSG00000002731(Prkra),ENSMUSG00000003346(Abhd17a),ENSMUSG00000003421(Nosip),ENSMUSG00000003518(Dusp3),ENSMUSG00000004099(Dnmt1),ENSMUSG00000004530(Coro1c),ENSMUSG…
BP	GO:0098542	defense response to other organism	337	66	403	1009	1.69171e-39	6.04454e-37	ENSMUSG00000000275(Trim25),ENSMUSG00000000409(Lck),ENSMUSG00000000776(Polr3d),ENSMUSG00000000791(Il12rb1),ENSMUSG00000000982(Ccl3),ENSMUSG00000000983(Wfdc18),ENSMUSG00000001123(Lgals9),ENSMUSG00000001166(Oas1c),ENSMUSG00000001168(Oas1h),ENSMUSG00000001348(Acp5),ENSMUSG00000002227(Mov10),ENSMUSG00000002602(Axl),ENSMUSG00000002897(Il17ra),ENSMUSG00000002983(Relb),ENSMUSG00000003283(Hck),ENSMUSG0000…	ENSMUSG00000000440(Pparg),ENSMUSG00000000631(Myo18a),ENSMUSG00000000869(Il4),ENSMUSG00000001366(Fbxo9),ENSMUSG00000003882(Il7r),ENSMUSG00000005102(Eif2ak4),ENSMUSG00000010047(Hyal2),ENSMUSG00000010054(Tusc2),ENSMUSG00000013707(Tnfaip8l2),ENSMUSG00000014470(Rnf166),ENSMUSG00000018428(Akap1),ENSMUSG00000019726(Lyst),ENSMUSG00000020263(Appl2),ENSMUSG00000020399(Havcr2),ENSMUSG00000020546(Stxbp4),ENS…
BP	GO:0071345	cellular response to cytokine stimulus	271	70	341	806	1.85669e-39	6.49287e-37	ENSMUSG00000000275(Trim25),ENSMUSG00000000628(Hk2),ENSMUSG00000000791(Il12rb1),ENSMUSG00000000982(Ccl3),ENSMUSG00000001288(Rarg),ENSMUSG00000001707(Eef1e1),ENSMUSG00000002111(Spi1),ENSMUSG00000002602(Axl),ENSMUSG00000002897(Il17ra),ENSMUSG00000003206(Ebi3),ENSMUSG00000003308(Keap1),ENSMUSG00000003382(Etv3),ENSMUSG00000004040(Stat3),ENSMUSG00000004043(Stat5a),ENSMUSG00000004266(Ptpn6),ENSMUSG00000…	ENSMUSG00000000440(Pparg),ENSMUSG00000000631(Myo18a),ENSMUSG00000002870(Mcm2),ENSMUSG00000003882(Il7r),ENSMUSG00000004071(Cdip1),ENSMUSG00000005951(Shpk),ENSMUSG00000006235(Epor),ENSMUSG00000006728(Cdk4),ENSMUSG00000010047(Hyal2),ENSMUSG00000010051(Hyal1),ENSMUSG00000013483(Card14),ENSMUSG00000015766(Eps8),ENSMUSG00000017146(Brca1),ENSMUSG00000018199(Ro60),ENSMUSG00000020263(Appl2),ENSMUSG0000002…
BP	GO:0043412	macromolecule modification	668	536	1204	4023	3.948e-39	1.35186e-36	ENSMUSG00000000184(Ccnd2),ENSMUSG00000000275(Trim25),ENSMUSG00000000409(Lck),ENSMUSG00000000532(Acvr1b),ENSMUSG00000000555(Itga5),ENSMUSG00000000708(Kat2b),ENSMUSG00000000730(Dnmt3l),ENSMUSG00000000791(Il12rb1),ENSMUSG00000000982(Ccl3),ENSMUSG00000001098(Kctd10),ENSMUSG00000001123(Lgals9),ENSMUSG00000001175(Calm1),ENSMUSG00000001630(Stk38l),ENSMUSG00000001632(Brpf1),ENSMUSG00000001663(Gstt1),ENSM…	ENSMUSG00000000869(Il4),ENSMUSG00000001054(Rmnd5b),ENSMUSG00000001228(Uhrf1),ENSMUSG00000001366(Fbxo9),ENSMUSG00000002109(Ddb2),ENSMUSG00000002228(Ppm1j),ENSMUSG00000002329(Mdp1),ENSMUSG00000002409(Dyrk1b),ENSMUSG00000002625(Akap8l),ENSMUSG00000002731(Prkra),ENSMUSG00000003346(Abhd17a),ENSMUSG00000003421(Nosip),ENSMUSG00000003518(Dusp3),ENSMUSG00000004099(Dnmt1),ENSMUSG00000004530(Coro1c),ENSMUSG…
BP	GO:0080090	regulation of primary metabolic process	908	768	1676	5975	4.85936e-39	1.62997e-36	ENSMUSG00000000078(Klf6),ENSMUSG00000000184(Ccnd2),ENSMUSG00000000247(Lhx2),ENSMUSG00000000275(Trim25),ENSMUSG00000000409(Lck),ENSMUSG00000000532(Acvr1b),ENSMUSG00000000555(Itga5),ENSMUSG00000000568(Hnrnpd),ENSMUSG00000000708(Kat2b),ENSMUSG00000000730(Dnmt3l),ENSMUSG00000000838(Fmr1),ENSMUSG00000000915(Hip1r),ENSMUSG00000000957(Mmp14),ENSMUSG00000000982(Ccl3),ENSMUSG00000000983(Wfdc18),ENSMUSG000…	ENSMUSG00000000028(Cdc45),ENSMUSG00000000149(Gna12),ENSMUSG00000000282(Mnt),ENSMUSG00000000326(Comt),ENSMUSG00000000440(Pparg),ENSMUSG00000000869(Il4),ENSMUSG00000001120(Pcbp3),ENSMUSG00000001228(Uhrf1),ENSMUSG00000001419(Mef2d),ENSMUSG00000001761(Smo),ENSMUSG00000002083(Bbc3),ENSMUSG00000002289(Angptl4),ENSMUSG00000002409(Dyrk1b),ENSMUSG00000002486(Tchp),ENSMUSG00000002617(Zfp40),ENSMUSG00000002…
BP	GO:1901564	organonitrogen compound metabolic process	962	823	1785	6439	5.4907e-39	1.8049e-36	ENSMUSG00000000001(Gnai3),ENSMUSG00000000184(Ccnd2),ENSMUSG00000000275(Trim25),ENSMUSG00000000385(Tmprss2),ENSMUSG00000000409(Lck),ENSMUSG00000000532(Acvr1b),ENSMUSG00000000555(Itga5),ENSMUSG00000000568(Hnrnpd),ENSMUSG00000000628(Hk2),ENSMUSG00000000708(Kat2b),ENSMUSG00000000791(Il12rb1),ENSMUSG00000000838(Fmr1),ENSMUSG00000000915(Hip1r),ENSMUSG00000000957(Mmp14),ENSMUSG00000000982(Ccl3),ENSMUSG0…	ENSMUSG00000000149(Gna12),ENSMUSG00000000253(Gmpr),ENSMUSG00000000326(Comt),ENSMUSG00000000440(Pparg),ENSMUSG00000000673(Haao),ENSMUSG00000000869(Il4),ENSMUSG00000001054(Rmnd5b),ENSMUSG00000001228(Uhrf1),ENSMUSG00000001366(Fbxo9),ENSMUSG00000001665(Gstt3),ENSMUSG00000001755(Coasy),ENSMUSG00000001827(Folr1),ENSMUSG00000001865(Cpa3),ENSMUSG00000002083(Bbc3),ENSMUSG00000002109(Ddb2),ENSMUSG000000022…
BP	GO:0045087	innate immune response	275	43	318	737	7.80441e-39	2.51516e-36	ENSMUSG00000000275(Trim25),ENSMUSG00000000409(Lck),ENSMUSG00000000776(Polr3d),ENSMUSG00000000791(Il12rb1),ENSMUSG00000000982(Ccl3),ENSMUSG00000000983(Wfdc18),ENSMUSG00000001123(Lgals9),ENSMUSG00000001168(Oas1h),ENSMUSG00000002602(Axl),ENSMUSG00000002897(Il17ra),ENSMUSG00000002983(Relb),ENSMUSG00000003283(Hck),ENSMUSG00000004043(Stat5a),ENSMUSG00000004266(Ptpn6),ENSMUSG00000004296(Il12b),ENSMUSG00…	ENSMUSG00000000440(Pparg),ENSMUSG00000000631(Myo18a),ENSMUSG00000000869(Il4),ENSMUSG00000001366(Fbxo9),ENSMUSG00000013707(Tnfaip8l2),ENSMUSG00000014470(Rnf166),ENSMUSG00000018428(Akap1),ENSMUSG00000019726(Lyst),ENSMUSG00000020263(Appl2),ENSMUSG00000020399(Havcr2),ENSMUSG00000020546(Stxbp4),ENSMUSG00000020823(Sec14l1),ENSMUSG00000021703(Serinc5),ENSMUSG00000022471(Xrcc6),ENSMUSG00000022476(Polr3h)…
BP	GO:0009966	regulation of signal transduction	533	367	900	2836	2.97537e-38	9.40445e-36	ENSMUSG00000000001(Gnai3),ENSMUSG00000000275(Trim25),ENSMUSG00000000409(Lck),ENSMUSG00000000532(Acvr1b),ENSMUSG00000000915(Hip1r),ENSMUSG00000000957(Mmp14),ENSMUSG00000000982(Ccl3),ENSMUSG00000001098(Kctd10),ENSMUSG00000001123(Lgals9),ENSMUSG00000001175(Calm1),ENSMUSG00000001707(Eef1e1),ENSMUSG00000001785(Pwp1),ENSMUSG00000002413(Braf),ENSMUSG00000002602(Axl),ENSMUSG00000002997(Prkar2b),ENSMUSG00…	ENSMUSG00000000149(Gna12),ENSMUSG00000000282(Mnt),ENSMUSG00000000440(Pparg),ENSMUSG00000000869(Il4),ENSMUSG00000001036(Epn2),ENSMUSG00000001366(Fbxo9),ENSMUSG00000001761(Smo),ENSMUSG00000001827(Folr1),ENSMUSG00000001995(Sipa1l2),ENSMUSG00000002083(Bbc3),ENSMUSG00000002731(Prkra),ENSMUSG00000003190(Bcl2l12),ENSMUSG00000003452(Bicd1),ENSMUSG00000003518(Dusp3),ENSMUSG00000003882(Il7r),ENSMUSG0000000…
BP	GO:0031325	positive regulation of cellular metabolic process	593	442	1035	3367	4.73014e-38	1.46688e-35	ENSMUSG00000000001(Gnai3),ENSMUSG00000000078(Klf6),ENSMUSG00000000184(Ccnd2),ENSMUSG00000000247(Lhx2),ENSMUSG00000000275(Trim25),ENSMUSG00000000409(Lck),ENSMUSG00000000532(Acvr1b),ENSMUSG00000000555(Itga5),ENSMUSG00000000568(Hnrnpd),ENSMUSG00000000628(Hk2),ENSMUSG00000000708(Kat2b),ENSMUSG00000000730(Dnmt3l),ENSMUSG00000000915(Hip1r),ENSMUSG00000000957(Mmp14),ENSMUSG00000000982(Ccl3),ENSMUSG00000…	ENSMUSG00000000326(Comt),ENSMUSG00000000440(Pparg),ENSMUSG00000000869(Il4),ENSMUSG00000001228(Uhrf1),ENSMUSG00000001419(Mef2d),ENSMUSG00000001761(Smo),ENSMUSG00000002083(Bbc3),ENSMUSG00000002409(Dyrk1b),ENSMUSG00000002617(Zfp40),ENSMUSG00000002625(Akap8l),ENSMUSG00000002968(Med25),ENSMUSG00000003190(Bcl2l12),ENSMUSG00000003282(Plag1),ENSMUSG00000003575(Crtc1),ENSMUSG00000003992(Ssbp2),ENSMUSG0000…
BP	GO:0051171	regulation of nitrogen compound metabolic process	894	736	1630	5810	1.23571e-37	3.76115e-35	ENSMUSG00000000078(Klf6),ENSMUSG00000000184(Ccnd2),ENSMUSG00000000247(Lhx2),ENSMUSG00000000275(Trim25),ENSMUSG00000000409(Lck),ENSMUSG00000000532(Acvr1b),ENSMUSG00000000555(Itga5),ENSMUSG00000000568(Hnrnpd),ENSMUSG00000000708(Kat2b),ENSMUSG00000000730(Dnmt3l),ENSMUSG00000000838(Fmr1),ENSMUSG00000000915(Hip1r),ENSMUSG00000000957(Mmp14),ENSMUSG00000000982(Ccl3),ENSMUSG00000000983(Wfdc18),ENSMUSG000…	ENSMUSG00000000028(Cdc45),ENSMUSG00000000149(Gna12),ENSMUSG00000000282(Mnt),ENSMUSG00000000326(Comt),ENSMUSG00000000440(Pparg),ENSMUSG00000000869(Il4),ENSMUSG00000001120(Pcbp3),ENSMUSG00000001228(Uhrf1),ENSMUSG00000001419(Mef2d),ENSMUSG00000001761(Smo),ENSMUSG00000002083(Bbc3),ENSMUSG00000002409(Dyrk1b),ENSMUSG00000002486(Tchp),ENSMUSG00000002617(Zfp40),ENSMUSG00000002625(Akap8l),ENSMUSG000000029…
BP	GO:0006796	phosphate-containing compound metabolic process	522	442	964	3099	2.34577e-37	7.01002e-35	ENSMUSG00000000001(Gnai3),ENSMUSG00000000184(Ccnd2),ENSMUSG00000000409(Lck),ENSMUSG00000000532(Acvr1b),ENSMUSG00000000555(Itga5),ENSMUSG00000000628(Hk2),ENSMUSG00000000708(Kat2b),ENSMUSG00000000791(Il12rb1),ENSMUSG00000000982(Ccl3),ENSMUSG00000001123(Lgals9),ENSMUSG00000001175(Calm1),ENSMUSG00000001348(Acp5),ENSMUSG00000001630(Stk38l),ENSMUSG00000001785(Pwp1),ENSMUSG00000001786(Fbxo7),ENSMUSG0000…	ENSMUSG00000000253(Gmpr),ENSMUSG00000000673(Haao),ENSMUSG00000000869(Il4),ENSMUSG00000001755(Coasy),ENSMUSG00000002228(Ppm1j),ENSMUSG00000002329(Mdp1),ENSMUSG00000002409(Dyrk1b),ENSMUSG00000002625(Akap8l),ENSMUSG00000002731(Prkra),ENSMUSG00000003518(Dusp3),ENSMUSG00000003623(Crot),ENSMUSG00000003809(Gcdh),ENSMUSG00000004530(Coro1c),ENSMUSG00000004565(Pnpla6),ENSMUSG00000004768(Rab23),ENSMUSG00000…
BP	GO:0006793	phosphorus metabolic process	524	445	969	3121	3.31783e-37	9.73783e-35	ENSMUSG00000000001(Gnai3),ENSMUSG00000000184(Ccnd2),ENSMUSG00000000409(Lck),ENSMUSG00000000532(Acvr1b),ENSMUSG00000000555(Itga5),ENSMUSG00000000628(Hk2),ENSMUSG00000000708(Kat2b),ENSMUSG00000000791(Il12rb1),ENSMUSG00000000982(Ccl3),ENSMUSG00000001123(Lgals9),ENSMUSG00000001175(Calm1),ENSMUSG00000001348(Acp5),ENSMUSG00000001630(Stk38l),ENSMUSG00000001785(Pwp1),ENSMUSG00000001786(Fbxo7),ENSMUSG0000…	ENSMUSG00000000253(Gmpr),ENSMUSG00000000673(Haao),ENSMUSG00000000869(Il4),ENSMUSG00000001755(Coasy),ENSMUSG00000002228(Ppm1j),ENSMUSG00000002329(Mdp1),ENSMUSG00000002409(Dyrk1b),ENSMUSG00000002625(Akap8l),ENSMUSG00000002731(Prkra),ENSMUSG00000003518(Dusp3),ENSMUSG00000003623(Crot),ENSMUSG00000003809(Gcdh),ENSMUSG00000004530(Coro1c),ENSMUSG00000004565(Pnpla6),ENSMUSG00000004768(Rab23),ENSMUSG00000…
BP	GO:0023051	regulation of signaling	589	420	1009	3279	3.66967e-37	1.05815e-34	ENSMUSG00000000001(Gnai3),ENSMUSG00000000275(Trim25),ENSMUSG00000000409(Lck),ENSMUSG00000000532(Acvr1b),ENSMUSG00000000915(Hip1r),ENSMUSG00000000957(Mmp14),ENSMUSG00000000982(Ccl3),ENSMUSG00000001098(Kctd10),ENSMUSG00000001123(Lgals9),ENSMUSG00000001175(Calm1),ENSMUSG00000001707(Eef1e1),ENSMUSG00000001785(Pwp1),ENSMUSG00000002413(Braf),ENSMUSG00000002602(Axl),ENSMUSG00000002997(Prkar2b),ENSMUSG00…	ENSMUSG00000000149(Gna12),ENSMUSG00000000282(Mnt),ENSMUSG00000000440(Pparg),ENSMUSG00000000869(Il4),ENSMUSG00000001036(Epn2),ENSMUSG00000001366(Fbxo9),ENSMUSG00000001761(Smo),ENSMUSG00000001827(Folr1),ENSMUSG00000001995(Sipa1l2),ENSMUSG00000002083(Bbc3),ENSMUSG00000002731(Prkra),ENSMUSG00000003190(Bcl2l12),ENSMUSG00000003378(Grik5),ENSMUSG00000003452(Bicd1),ENSMUSG00000003518(Dusp3),ENSMUSG000000…
CC	GO:0005654	nucleoplasm	560	522	1082	3593	8.34612e-37	2.36512e-34	ENSMUSG00000000078(Klf6),ENSMUSG00000000184(Ccnd2),ENSMUSG00000000247(Lhx2),ENSMUSG00000000275(Trim25),ENSMUSG00000000568(Hnrnpd),ENSMUSG00000000708(Kat2b),ENSMUSG00000000730(Dnmt3l),ENSMUSG00000000776(Polr3d),ENSMUSG00000001098(Kctd10),ENSMUSG00000001156(Mxd1),ENSMUSG00000001166(Oas1c),ENSMUSG00000001168(Oas1h),ENSMUSG00000001175(Calm1),ENSMUSG00000001288(Rarg),ENSMUSG00000001440(Kpnb1),ENSMUSG0…	ENSMUSG00000000028(Cdc45),ENSMUSG00000000056(Narf),ENSMUSG00000000282(Mnt),ENSMUSG00000000440(Pparg),ENSMUSG00000000751(Rpa1),ENSMUSG00000000823(Zfp512b),ENSMUSG00000001228(Uhrf1),ENSMUSG00000001419(Mef2d),ENSMUSG00000001741(Il16),ENSMUSG00000001962(Fam50a),ENSMUSG00000002109(Ddb2),ENSMUSG00000002257(Def6),ENSMUSG00000002409(Dyrk1b),ENSMUSG00000002625(Akap8l),ENSMUSG00000002731(Prkra),ENSMUSG0000…
BP	GO:0010646	regulation of cell communication	586	417	1003	3264	1.23118e-36	3.42977e-34	ENSMUSG00000000001(Gnai3),ENSMUSG00000000275(Trim25),ENSMUSG00000000409(Lck),ENSMUSG00000000532(Acvr1b),ENSMUSG00000000915(Hip1r),ENSMUSG00000000957(Mmp14),ENSMUSG00000000982(Ccl3),ENSMUSG00000001098(Kctd10),ENSMUSG00000001123(Lgals9),ENSMUSG00000001175(Calm1),ENSMUSG00000001707(Eef1e1),ENSMUSG00000001785(Pwp1),ENSMUSG00000002413(Braf),ENSMUSG00000002602(Axl),ENSMUSG00000002997(Prkar2b),ENSMUSG00…	ENSMUSG00000000149(Gna12),ENSMUSG00000000282(Mnt),ENSMUSG00000000440(Pparg),ENSMUSG00000000869(Il4),ENSMUSG00000001036(Epn2),ENSMUSG00000001366(Fbxo9),ENSMUSG00000001761(Smo),ENSMUSG00000001827(Folr1),ENSMUSG00000001995(Sipa1l2),ENSMUSG00000002083(Bbc3),ENSMUSG00000002731(Prkra),ENSMUSG00000003190(Bcl2l12),ENSMUSG00000003378(Grik5),ENSMUSG00000003452(Bicd1),ENSMUSG00000003518(Dusp3),ENSMUSG000000…
BP	GO:0031347	regulation of defense response	204	56	260	572	2.0084e-36	5.50168e-34	ENSMUSG00000000776(Polr3d),ENSMUSG00000000791(Il12rb1),ENSMUSG00000000982(Ccl3),ENSMUSG00000001123(Lgals9),ENSMUSG00000001348(Acp5),ENSMUSG00000002897(Il17ra),ENSMUSG00000004040(Stat3),ENSMUSG00000004043(Stat5a),ENSMUSG00000004296(Il12b),ENSMUSG00000005779(Psmb4),ENSMUSG00000006205(Htra1),ENSMUSG00000010358(Ifi35),ENSMUSG00000015947(Fcgr1),ENSMUSG00000016206(H2-M3),ENSMUSG00000016529(Il10),ENSMUS…	ENSMUSG00000000440(Pparg),ENSMUSG00000000869(Il4),ENSMUSG00000001741(Il16),ENSMUSG00000005102(Eif2ak4),ENSMUSG00000005583(Mef2c),ENSMUSG00000005951(Shpk),ENSMUSG00000010047(Hyal2),ENSMUSG00000013707(Tnfaip8l2),ENSMUSG00000014158(Trpv4),ENSMUSG00000017697(Ada),ENSMUSG00000020263(Appl2),ENSMUSG00000020399(Havcr2),ENSMUSG00000020823(Sec14l1),ENSMUSG00000020889(Nr1d1),ENSMUSG00000021775(Nr1d2),ENSMUS…
BP	GO:0002684	positive regulation of immune system process	253	93	346	848	4.07469e-36	1.0979e-33	ENSMUSG00000000409(Lck),ENSMUSG00000000532(Acvr1b),ENSMUSG00000000732(Icosl),ENSMUSG00000000776(Polr3d),ENSMUSG00000000791(Il12rb1),ENSMUSG00000000957(Mmp14),ENSMUSG00000000982(Ccl3),ENSMUSG00000001123(Lgals9),ENSMUSG00000001300(Efnb2),ENSMUSG00000002413(Braf),ENSMUSG00000002602(Axl),ENSMUSG00000002699(Lcp2),ENSMUSG00000003352(Cacnb3),ENSMUSG00000004040(Stat3),ENSMUSG00000004043(Stat5a),ENSMUSG00…	ENSMUSG00000000631(Myo18a),ENSMUSG00000000869(Il4),ENSMUSG00000002308(Cd320),ENSMUSG00000003518(Dusp3),ENSMUSG00000003882(Il7r),ENSMUSG00000005102(Eif2ak4),ENSMUSG00000005583(Mef2c),ENSMUSG00000014158(Trpv4),ENSMUSG00000016493(Cd46),ENSMUSG00000016933(Plcg1),ENSMUSG00000017550(Atad5),ENSMUSG00000017697(Ada),ENSMUSG00000018752(Tnfsfm13),ENSMUSG00000020167(Tcf3),ENSMUSG00000020263(Appl2),ENSMUSG000…
BP	GO:0080134	regulation of response to stress	327	153	480	1305	4.44729e-36	1.17896e-33	ENSMUSG00000000776(Polr3d),ENSMUSG00000000791(Il12rb1),ENSMUSG00000000982(Ccl3),ENSMUSG00000001123(Lgals9),ENSMUSG00000001348(Acp5),ENSMUSG00000001707(Eef1e1),ENSMUSG00000001786(Fbxo7),ENSMUSG00000002413(Braf),ENSMUSG00000002897(Il17ra),ENSMUSG00000003208(Yju2),ENSMUSG00000003541(Ier3),ENSMUSG00000004040(Stat3),ENSMUSG00000004043(Stat5a),ENSMUSG00000004085(Map3k20),ENSMUSG00000004221(Ikbkg),ENSMU…	ENSMUSG00000000440(Pparg),ENSMUSG00000000869(Il4),ENSMUSG00000001741(Il16),ENSMUSG00000003190(Bcl2l12),ENSMUSG00000003518(Dusp3),ENSMUSG00000005102(Eif2ak4),ENSMUSG00000005583(Mef2c),ENSMUSG00000005951(Shpk),ENSMUSG00000006235(Epor),ENSMUSG00000010047(Hyal2),ENSMUSG00000010461(Eya4),ENSMUSG00000013236(Ptprs),ENSMUSG00000013707(Tnfaip8l2),ENSMUSG00000014158(Trpv4),ENSMUSG00000014426(Map3k4),ENSMUS…
MF	GO:0003824	catalytic activity	759	854	1613	5775	4.80918e-36	1.25466e-33	ENSMUSG00000000001(Gnai3),ENSMUSG00000000275(Trim25),ENSMUSG00000000385(Tmprss2),ENSMUSG00000000409(Lck),ENSMUSG00000000532(Acvr1b),ENSMUSG00000000628(Hk2),ENSMUSG00000000708(Kat2b),ENSMUSG00000000730(Dnmt3l),ENSMUSG00000000776(Polr3d),ENSMUSG00000000957(Mmp14),ENSMUSG00000000982(Ccl3),ENSMUSG00000001098(Kctd10),ENSMUSG00000001166(Oas1c),ENSMUSG00000001168(Oas1h),ENSMUSG00000001348(Acp5),ENSMUSG0…	ENSMUSG00000000149(Gna12),ENSMUSG00000000253(Gmpr),ENSMUSG00000000326(Comt),ENSMUSG00000000631(Myo18a),ENSMUSG00000000673(Haao),ENSMUSG00000000686(Abhd15),ENSMUSG00000001054(Rmnd5b),ENSMUSG00000001228(Uhrf1),ENSMUSG00000001665(Gstt3),ENSMUSG00000001751(Naglu),ENSMUSG00000001755(Coasy),ENSMUSG00000001865(Cpa3),ENSMUSG00000001942(Siae),ENSMUSG00000002109(Ddb2),ENSMUSG00000002228(Ppm1j),ENSMUSG00000…
BP	GO:0044093	positive regulation of molecular function	353	227	580	1667	1.08419e-35	2.78434e-33	ENSMUSG00000000001(Gnai3),ENSMUSG00000000184(Ccnd2),ENSMUSG00000000275(Trim25),ENSMUSG00000000409(Lck),ENSMUSG00000000568(Hnrnpd),ENSMUSG00000000600(Krit1),ENSMUSG00000000708(Kat2b),ENSMUSG00000000915(Hip1r),ENSMUSG00000000982(Ccl3),ENSMUSG00000001123(Lgals9),ENSMUSG00000001175(Calm1),ENSMUSG00000001627(Ifrd1),ENSMUSG00000001768(Rin2),ENSMUSG00000002233(Rhoc),ENSMUSG00000002307(Daxx),ENSMUSG00000…	ENSMUSG00000000440(Pparg),ENSMUSG00000000869(Il4),ENSMUSG00000001761(Smo),ENSMUSG00000001995(Sipa1l2),ENSMUSG00000002083(Bbc3),ENSMUSG00000002968(Med25),ENSMUSG00000003134(Tbc1d8),ENSMUSG00000003575(Crtc1),ENSMUSG00000004530(Coro1c),ENSMUSG00000004633(Chn2),ENSMUSG00000005370(Msh6),ENSMUSG00000005514(Por),ENSMUSG00000005534(Insr),ENSMUSG00000005583(Mef2c),ENSMUSG00000005718(Tfap4),ENSMUSG00000005…
BP	GO:0050790	regulation of catalytic activity	457	309	766	2361	1.33786e-35	3.38293e-33	ENSMUSG00000000001(Gnai3),ENSMUSG00000000184(Ccnd2),ENSMUSG00000000409(Lck),ENSMUSG00000000568(Hnrnpd),ENSMUSG00000000600(Krit1),ENSMUSG00000000708(Kat2b),ENSMUSG00000000730(Dnmt3l),ENSMUSG00000000915(Hip1r),ENSMUSG00000000982(Ccl3),ENSMUSG00000000983(Wfdc18),ENSMUSG00000001123(Lgals9),ENSMUSG00000001166(Oas1c),ENSMUSG00000001168(Oas1h),ENSMUSG00000001175(Calm1),ENSMUSG00000001632(Brpf1),ENSMUSG0…	ENSMUSG00000000440(Pparg),ENSMUSG00000000869(Il4),ENSMUSG00000001995(Sipa1l2),ENSMUSG00000002083(Bbc3),ENSMUSG00000002289(Angptl4),ENSMUSG00000002731(Prkra),ENSMUSG00000002870(Mcm2),ENSMUSG00000003134(Tbc1d8),ENSMUSG00000003190(Bcl2l12),ENSMUSG00000003421(Nosip),ENSMUSG00000003452(Bicd1),ENSMUSG00000003518(Dusp3),ENSMUSG00000004530(Coro1c),ENSMUSG00000004633(Chn2),ENSMUSG00000005370(Msh6),ENSMUSG…
BP	GO:0044267	cellular protein metabolic process	797	615	1412	4955	7.17778e-35	1.78748e-32	ENSMUSG00000000184(Ccnd2),ENSMUSG00000000275(Trim25),ENSMUSG00000000409(Lck),ENSMUSG00000000532(Acvr1b),ENSMUSG00000000555(Itga5),ENSMUSG00000000568(Hnrnpd),ENSMUSG00000000708(Kat2b),ENSMUSG00000000791(Il12rb1),ENSMUSG00000000838(Fmr1),ENSMUSG00000000915(Hip1r),ENSMUSG00000000957(Mmp14),ENSMUSG00000000982(Ccl3),ENSMUSG00000000983(Wfdc18),ENSMUSG00000001098(Kctd10),ENSMUSG00000001123(Lgals9),ENSMU…	ENSMUSG00000000149(Gna12),ENSMUSG00000000440(Pparg),ENSMUSG00000000869(Il4),ENSMUSG00000001054(Rmnd5b),ENSMUSG00000001228(Uhrf1),ENSMUSG00000001366(Fbxo9),ENSMUSG00000002083(Bbc3),ENSMUSG00000002109(Ddb2),ENSMUSG00000002228(Ppm1j),ENSMUSG00000002329(Mdp1),ENSMUSG00000002409(Dyrk1b),ENSMUSG00000002625(Akap8l),ENSMUSG00000002731(Prkra),ENSMUSG00000002767(Mrpl2),ENSMUSG00000003190(Bcl2l12),ENSMUSG00…
BP	GO:0032101	regulation of response to external stimulus	271	87	358	899	9.2802e-35	2.27656e-32	ENSMUSG00000000776(Polr3d),ENSMUSG00000000791(Il12rb1),ENSMUSG00000000982(Ccl3),ENSMUSG00000001123(Lgals9),ENSMUSG00000001300(Efnb2),ENSMUSG00000001348(Acp5),ENSMUSG00000002413(Braf),ENSMUSG00000002897(Il17ra),ENSMUSG00000003352(Cacnb3),ENSMUSG00000004040(Stat3),ENSMUSG00000004043(Stat5a),ENSMUSG00000004296(Il12b),ENSMUSG00000004936(Map2k1),ENSMUSG00000005779(Psmb4),ENSMUSG00000006205(Htra1),ENSM…	ENSMUSG00000000440(Pparg),ENSMUSG00000000869(Il4),ENSMUSG00000001227(Sema6b),ENSMUSG00000001741(Il16),ENSMUSG00000003518(Dusp3),ENSMUSG00000005102(Eif2ak4),ENSMUSG00000005951(Shpk),ENSMUSG00000010047(Hyal2),ENSMUSG00000013236(Ptprs),ENSMUSG00000013707(Tnfaip8l2),ENSMUSG00000014158(Trpv4),ENSMUSG00000017697(Ada),ENSMUSG00000019874(Fabp7),ENSMUSG00000020263(Appl2),ENSMUSG00000020399(Havcr2),ENSMUSG…
BP	GO:0051173	positive regulation of nitrogen compound metabolic process	559	411	970	3167	1.20674e-34	2.91676e-32	ENSMUSG00000000078(Klf6),ENSMUSG00000000184(Ccnd2),ENSMUSG00000000247(Lhx2),ENSMUSG00000000275(Trim25),ENSMUSG00000000409(Lck),ENSMUSG00000000532(Acvr1b),ENSMUSG00000000555(Itga5),ENSMUSG00000000568(Hnrnpd),ENSMUSG00000000708(Kat2b),ENSMUSG00000000730(Dnmt3l),ENSMUSG00000000915(Hip1r),ENSMUSG00000000957(Mmp14),ENSMUSG00000000982(Ccl3),ENSMUSG00000001123(Lgals9),ENSMUSG00000001175(Calm1),ENSMUSG00…	ENSMUSG00000000326(Comt),ENSMUSG00000000440(Pparg),ENSMUSG00000000869(Il4),ENSMUSG00000001228(Uhrf1),ENSMUSG00000001419(Mef2d),ENSMUSG00000001761(Smo),ENSMUSG00000002083(Bbc3),ENSMUSG00000002409(Dyrk1b),ENSMUSG00000002617(Zfp40),ENSMUSG00000002625(Akap8l),ENSMUSG00000002968(Med25),ENSMUSG00000003190(Bcl2l12),ENSMUSG00000003282(Plag1),ENSMUSG00000003575(Crtc1),ENSMUSG00000003992(Ssbp2),ENSMUSG0000…
BP	GO:0071840	cellular component organization or biogenesis	865	812	1677	6082	2.94626e-34	7.01807e-32	ENSMUSG00000000001(Gnai3),ENSMUSG00000000247(Lhx2),ENSMUSG00000000532(Acvr1b),ENSMUSG00000000555(Itga5),ENSMUSG00000000568(Hnrnpd),ENSMUSG00000000628(Hk2),ENSMUSG00000000708(Kat2b),ENSMUSG00000000730(Dnmt3l),ENSMUSG00000000915(Hip1r),ENSMUSG00000000957(Mmp14),ENSMUSG00000000982(Ccl3),ENSMUSG00000001052(Sec24b),ENSMUSG00000001098(Kctd10),ENSMUSG00000001175(Calm1),ENSMUSG00000001248(Gramd1a),ENSMUS…	ENSMUSG00000000028(Cdc45),ENSMUSG00000000440(Pparg),ENSMUSG00000000631(Myo18a),ENSMUSG00000000751(Rpa1),ENSMUSG00000000869(Il4),ENSMUSG00000001036(Epn2),ENSMUSG00000001143(Lman2l),ENSMUSG00000001227(Sema6b),ENSMUSG00000001228(Uhrf1),ENSMUSG00000001482(Def8),ENSMUSG00000001751(Naglu),ENSMUSG00000001761(Smo),ENSMUSG00000001827(Folr1),ENSMUSG00000001962(Fam50a),ENSMUSG00000002031(Ift46),ENSMUSG00000…
BP	GO:0016043	cellular component organization	839	795	1634	5901	3.46397e-34	8.13341e-32	ENSMUSG00000000001(Gnai3),ENSMUSG00000000247(Lhx2),ENSMUSG00000000532(Acvr1b),ENSMUSG00000000555(Itga5),ENSMUSG00000000568(Hnrnpd),ENSMUSG00000000628(Hk2),ENSMUSG00000000708(Kat2b),ENSMUSG00000000730(Dnmt3l),ENSMUSG00000000915(Hip1r),ENSMUSG00000000957(Mmp14),ENSMUSG00000000982(Ccl3),ENSMUSG00000001052(Sec24b),ENSMUSG00000001098(Kctd10),ENSMUSG00000001175(Calm1),ENSMUSG00000001248(Gramd1a),ENSMUS…	ENSMUSG00000000028(Cdc45),ENSMUSG00000000440(Pparg),ENSMUSG00000000631(Myo18a),ENSMUSG00000000751(Rpa1),ENSMUSG00000000869(Il4),ENSMUSG00000001036(Epn2),ENSMUSG00000001143(Lman2l),ENSMUSG00000001227(Sema6b),ENSMUSG00000001228(Uhrf1),ENSMUSG00000001482(Def8),ENSMUSG00000001751(Naglu),ENSMUSG00000001761(Smo),ENSMUSG00000001827(Folr1),ENSMUSG00000001962(Fam50a),ENSMUSG00000002031(Ift46),ENSMUSG00000…
BP	GO:0001816	cytokine production	224	75	299	718	3.88751e-33	8.99931e-31	ENSMUSG00000000732(Icosl),ENSMUSG00000000776(Polr3d),ENSMUSG00000000791(Il12rb1),ENSMUSG00000000982(Ccl3),ENSMUSG00000001123(Lgals9),ENSMUSG00000001348(Acp5),ENSMUSG00000002602(Axl),ENSMUSG00000002897(Il17ra),ENSMUSG00000002983(Relb),ENSMUSG00000004040(Stat3),ENSMUSG00000004043(Stat5a),ENSMUSG00000004266(Ptpn6),ENSMUSG00000004296(Il12b),ENSMUSG00000004709(Cd244a),ENSMUSG00000005413(Hmox1),ENSMUSG…	ENSMUSG00000000869(Il4),ENSMUSG00000001741(Il16),ENSMUSG00000006678(Pola1),ENSMUSG00000006800(Sulf2),ENSMUSG00000010047(Hyal2),ENSMUSG00000010054(Tusc2),ENSMUSG00000013236(Ptprs),ENSMUSG00000014158(Trpv4),ENSMUSG00000016493(Cd46),ENSMUSG00000017146(Brca1),ENSMUSG00000018909(Arrb1),ENSMUSG00000020263(Appl2),ENSMUSG00000020399(Havcr2),ENSMUSG00000020823(Sec14l1),ENSMUSG00000021253(Tgfb3),ENSMUSG000…
BP	GO:0001817	regulation of cytokine production	219	72	291	693	5.04047e-33	1.15063e-30	ENSMUSG00000000732(Icosl),ENSMUSG00000000776(Polr3d),ENSMUSG00000000791(Il12rb1),ENSMUSG00000000982(Ccl3),ENSMUSG00000001123(Lgals9),ENSMUSG00000001348(Acp5),ENSMUSG00000002602(Axl),ENSMUSG00000002897(Il17ra),ENSMUSG00000002983(Relb),ENSMUSG00000004040(Stat3),ENSMUSG00000004043(Stat5a),ENSMUSG00000004266(Ptpn6),ENSMUSG00000004296(Il12b),ENSMUSG00000004709(Cd244a),ENSMUSG00000005413(Hmox1),ENSMUSG…	ENSMUSG00000000869(Il4),ENSMUSG00000001741(Il16),ENSMUSG00000006678(Pola1),ENSMUSG00000006800(Sulf2),ENSMUSG00000010047(Hyal2),ENSMUSG00000010054(Tusc2),ENSMUSG00000013236(Ptprs),ENSMUSG00000014158(Trpv4),ENSMUSG00000016493(Cd46),ENSMUSG00000017146(Brca1),ENSMUSG00000018909(Arrb1),ENSMUSG00000020263(Appl2),ENSMUSG00000020399(Havcr2),ENSMUSG00000020823(Sec14l1),ENSMUSG00000021253(Tgfb3),ENSMUSG000…
CC	GO:0070013	intracellular organelle lumen	676	638	1314	4613	6.14292e-33	1.38308e-30	ENSMUSG00000000078(Klf6),ENSMUSG00000000184(Ccnd2),ENSMUSG00000000247(Lhx2),ENSMUSG00000000275(Trim25),ENSMUSG00000000568(Hnrnpd),ENSMUSG00000000708(Kat2b),ENSMUSG00000000730(Dnmt3l),ENSMUSG00000000776(Polr3d),ENSMUSG00000000838(Fmr1),ENSMUSG00000001098(Kctd10),ENSMUSG00000001156(Mxd1),ENSMUSG00000001166(Oas1c),ENSMUSG00000001168(Oas1h),ENSMUSG00000001175(Calm1),ENSMUSG00000001288(Rarg),ENSMUSG00…	ENSMUSG00000000028(Cdc45),ENSMUSG00000000056(Narf),ENSMUSG00000000282(Mnt),ENSMUSG00000000440(Pparg),ENSMUSG00000000751(Rpa1),ENSMUSG00000000823(Zfp512b),ENSMUSG00000001228(Uhrf1),ENSMUSG00000001419(Mef2d),ENSMUSG00000001741(Il16),ENSMUSG00000001755(Coasy),ENSMUSG00000001962(Fam50a),ENSMUSG00000002109(Ddb2),ENSMUSG00000002257(Def6),ENSMUSG00000002409(Dyrk1b),ENSMUSG00000002625(Akap8l),ENSMUSG0000…
CC	GO:0031974	membrane-enclosed lumen	676	638	1314	4614	6.86967e-33	1.50546e-30	ENSMUSG00000000078(Klf6),ENSMUSG00000000184(Ccnd2),ENSMUSG00000000247(Lhx2),ENSMUSG00000000275(Trim25),ENSMUSG00000000568(Hnrnpd),ENSMUSG00000000708(Kat2b),ENSMUSG00000000730(Dnmt3l),ENSMUSG00000000776(Polr3d),ENSMUSG00000000838(Fmr1),ENSMUSG00000001098(Kctd10),ENSMUSG00000001156(Mxd1),ENSMUSG00000001166(Oas1c),ENSMUSG00000001168(Oas1h),ENSMUSG00000001175(Calm1),ENSMUSG00000001288(Rarg),ENSMUSG00…	ENSMUSG00000000028(Cdc45),ENSMUSG00000000056(Narf),ENSMUSG00000000282(Mnt),ENSMUSG00000000440(Pparg),ENSMUSG00000000751(Rpa1),ENSMUSG00000000823(Zfp512b),ENSMUSG00000001228(Uhrf1),ENSMUSG00000001419(Mef2d),ENSMUSG00000001741(Il16),ENSMUSG00000001755(Coasy),ENSMUSG00000001962(Fam50a),ENSMUSG00000002109(Ddb2),ENSMUSG00000002257(Def6),ENSMUSG00000002409(Dyrk1b),ENSMUSG00000002625(Akap8l),ENSMUSG0000…
CC	GO:0043233	organelle lumen	676	638	1314	4614	6.86967e-33	1.50546e-30	ENSMUSG00000000078(Klf6),ENSMUSG00000000184(Ccnd2),ENSMUSG00000000247(Lhx2),ENSMUSG00000000275(Trim25),ENSMUSG00000000568(Hnrnpd),ENSMUSG00000000708(Kat2b),ENSMUSG00000000730(Dnmt3l),ENSMUSG00000000776(Polr3d),ENSMUSG00000000838(Fmr1),ENSMUSG00000001098(Kctd10),ENSMUSG00000001156(Mxd1),ENSMUSG00000001166(Oas1c),ENSMUSG00000001168(Oas1h),ENSMUSG00000001175(Calm1),ENSMUSG00000001288(Rarg),ENSMUSG00…	ENSMUSG00000000028(Cdc45),ENSMUSG00000000056(Narf),ENSMUSG00000000282(Mnt),ENSMUSG00000000440(Pparg),ENSMUSG00000000751(Rpa1),ENSMUSG00000000823(Zfp512b),ENSMUSG00000001228(Uhrf1),ENSMUSG00000001419(Mef2d),ENSMUSG00000001741(Il16),ENSMUSG00000001755(Coasy),ENSMUSG00000001962(Fam50a),ENSMUSG00000002109(Ddb2),ENSMUSG00000002257(Def6),ENSMUSG00000002409(Dyrk1b),ENSMUSG00000002625(Akap8l),ENSMUSG0000…
BP	GO:0002252	immune effector process	229	69	298	718	1.0227e-32	2.21173e-30	ENSMUSG00000000275(Trim25),ENSMUSG00000000732(Icosl),ENSMUSG00000000776(Polr3d),ENSMUSG00000000791(Il12rb1),ENSMUSG00000000982(Ccl3),ENSMUSG00000001123(Lgals9),ENSMUSG00000001166(Oas1c),ENSMUSG00000001168(Oas1h),ENSMUSG00000002227(Mov10),ENSMUSG00000002983(Relb),ENSMUSG00000004040(Stat3),ENSMUSG00000004043(Stat5a),ENSMUSG00000004266(Ptpn6),ENSMUSG00000004296(Il12b),ENSMUSG00000004709(Cd244a),ENSM…	ENSMUSG00000000631(Myo18a),ENSMUSG00000000869(Il4),ENSMUSG00000003882(Il7r),ENSMUSG00000005102(Eif2ak4),ENSMUSG00000005370(Msh6),ENSMUSG00000010047(Hyal2),ENSMUSG00000010054(Tusc2),ENSMUSG00000016493(Cd46),ENSMUSG00000017550(Atad5),ENSMUSG00000017697(Ada),ENSMUSG00000018428(Akap1),ENSMUSG00000018752(Tnfsfm13),ENSMUSG00000019726(Lyst),ENSMUSG00000020263(Appl2),ENSMUSG00000020399(Havcr2),ENSMUSG000…
BP	GO:0009058	biosynthetic process	768	836	1604	5812	1.75516e-32	3.74646e-30	ENSMUSG00000000078(Klf6),ENSMUSG00000000247(Lhx2),ENSMUSG00000000275(Trim25),ENSMUSG00000000532(Acvr1b),ENSMUSG00000000568(Hnrnpd),ENSMUSG00000000708(Kat2b),ENSMUSG00000000730(Dnmt3l),ENSMUSG00000000776(Polr3d),ENSMUSG00000000838(Fmr1),ENSMUSG00000000982(Ccl3),ENSMUSG00000001156(Mxd1),ENSMUSG00000001288(Rarg),ENSMUSG00000001348(Acp5),ENSMUSG00000001416(Cct3),ENSMUSG00000001467(Cyp51),ENSMUSG00000…	ENSMUSG00000000028(Cdc45),ENSMUSG00000000282(Mnt),ENSMUSG00000000440(Pparg),ENSMUSG00000000673(Haao),ENSMUSG00000000751(Rpa1),ENSMUSG00000000869(Il4),ENSMUSG00000001120(Pcbp3),ENSMUSG00000001228(Uhrf1),ENSMUSG00000001419(Mef2d),ENSMUSG00000001755(Coasy),ENSMUSG00000001761(Smo),ENSMUSG00000002409(Dyrk1b),ENSMUSG00000002486(Tchp),ENSMUSG00000002617(Zfp40),ENSMUSG00000002625(Akap8l),ENSMUSG000000027…
CC	GO:0031981	nuclear lumen	619	569	1188	4104	2.05274e-32	4.32549e-30	ENSMUSG00000000078(Klf6),ENSMUSG00000000184(Ccnd2),ENSMUSG00000000247(Lhx2),ENSMUSG00000000275(Trim25),ENSMUSG00000000568(Hnrnpd),ENSMUSG00000000708(Kat2b),ENSMUSG00000000730(Dnmt3l),ENSMUSG00000000776(Polr3d),ENSMUSG00000000838(Fmr1),ENSMUSG00000001098(Kctd10),ENSMUSG00000001156(Mxd1),ENSMUSG00000001166(Oas1c),ENSMUSG00000001168(Oas1h),ENSMUSG00000001175(Calm1),ENSMUSG00000001288(Rarg),ENSMUSG00…	ENSMUSG00000000028(Cdc45),ENSMUSG00000000056(Narf),ENSMUSG00000000282(Mnt),ENSMUSG00000000440(Pparg),ENSMUSG00000000751(Rpa1),ENSMUSG00000000823(Zfp512b),ENSMUSG00000001228(Uhrf1),ENSMUSG00000001419(Mef2d),ENSMUSG00000001741(Il16),ENSMUSG00000001962(Fam50a),ENSMUSG00000002109(Ddb2),ENSMUSG00000002257(Def6),ENSMUSG00000002409(Dyrk1b),ENSMUSG00000002625(Akap8l),ENSMUSG00000002731(Prkra),ENSMUSG0000…
BP	GO:0051239	regulation of multicellular organismal process	575	396	971	3213	3.3223e-32	6.91207e-30	ENSMUSG00000000247(Lhx2),ENSMUSG00000000248(Clec2g),ENSMUSG00000000409(Lck),ENSMUSG00000000532(Acvr1b),ENSMUSG00000000555(Itga5),ENSMUSG00000000600(Krit1),ENSMUSG00000000628(Hk2),ENSMUSG00000000708(Kat2b),ENSMUSG00000000732(Icosl),ENSMUSG00000000776(Polr3d),ENSMUSG00000000791(Il12rb1),ENSMUSG00000000915(Hip1r),ENSMUSG00000000957(Mmp14),ENSMUSG00000000982(Ccl3),ENSMUSG00000001052(Sec24b),ENSMUSG00…	ENSMUSG00000000326(Comt),ENSMUSG00000000440(Pparg),ENSMUSG00000000869(Il4),ENSMUSG00000001036(Epn2),ENSMUSG00000001227(Sema6b),ENSMUSG00000001482(Def8),ENSMUSG00000001741(Il16),ENSMUSG00000001761(Smo),ENSMUSG00000002274(Metrn),ENSMUSG00000003282(Plag1),ENSMUSG00000003575(Crtc1),ENSMUSG00000003882(Il7r),ENSMUSG00000004099(Dnmt1),ENSMUSG00000004530(Coro1c),ENSMUSG00000004798(Ulk2),ENSMUSG0000000510…
BP	GO:0006954	inflammatory response	225	66	291	704	1.35855e-31	2.79114e-29	ENSMUSG00000000982(Ccl3),ENSMUSG00000001123(Lgals9),ENSMUSG00000001348(Acp5),ENSMUSG00000002602(Axl),ENSMUSG00000002897(Il17ra),ENSMUSG00000002983(Relb),ENSMUSG00000003283(Hck),ENSMUSG00000004040(Stat3),ENSMUSG00000004043(Stat5a),ENSMUSG00000004296(Il12b),ENSMUSG00000005413(Hmox1),ENSMUSG00000005779(Psmb4),ENSMUSG00000009185(Ccl8),ENSMUSG00000010358(Ifi35),ENSMUSG00000014599(Csf1),ENSMUSG00000015…	ENSMUSG00000000440(Pparg),ENSMUSG00000000869(Il4),ENSMUSG00000001741(Il16),ENSMUSG00000001761(Smo),ENSMUSG00000005951(Shpk),ENSMUSG00000006344(Ggt5),ENSMUSG00000008845(Cd163),ENSMUSG00000010047(Hyal2),ENSMUSG00000010051(Hyal1),ENSMUSG00000010054(Tusc2),ENSMUSG00000013707(Tnfaip8l2),ENSMUSG00000014158(Trpv4),ENSMUSG00000017697(Ada),ENSMUSG00000020263(Appl2),ENSMUSG00000020399(Havcr2),ENSMUSG000000…
BP	GO:0001819	positive regulation of cytokine production	164	45	209	447	1.54138e-31	3.12767e-29	ENSMUSG00000000732(Icosl),ENSMUSG00000000776(Polr3d),ENSMUSG00000000791(Il12rb1),ENSMUSG00000000982(Ccl3),ENSMUSG00000001123(Lgals9),ENSMUSG00000002897(Il17ra),ENSMUSG00000004040(Stat3),ENSMUSG00000004043(Stat5a),ENSMUSG00000004296(Il12b),ENSMUSG00000004709(Cd244a),ENSMUSG00000008496(Pou2f2),ENSMUSG00000011008(Mcoln2),ENSMUSG00000015316(Slamf1),ENSMUSG00000015340(Cybb),ENSMUSG00000015396(Cd83),EN…	ENSMUSG00000000869(Il4),ENSMUSG00000001741(Il16),ENSMUSG00000006800(Sulf2),ENSMUSG00000010047(Hyal2),ENSMUSG00000010054(Tusc2),ENSMUSG00000014158(Trpv4),ENSMUSG00000016493(Cd46),ENSMUSG00000017146(Brca1),ENSMUSG00000020399(Havcr2),ENSMUSG00000020823(Sec14l1),ENSMUSG00000021356(Irf4),ENSMUSG00000021699(Pde4d),ENSMUSG00000022708(Zbtb20),ENSMUSG00000026012(Cd28),ENSMUSG00000026228(Htr2b),ENSMUSG0000…
BP	GO:0044249	cellular biosynthetic process	742	816	1558	5641	1.94618e-31	3.9009e-29	ENSMUSG00000000078(Klf6),ENSMUSG00000000247(Lhx2),ENSMUSG00000000275(Trim25),ENSMUSG00000000532(Acvr1b),ENSMUSG00000000568(Hnrnpd),ENSMUSG00000000708(Kat2b),ENSMUSG00000000730(Dnmt3l),ENSMUSG00000000776(Polr3d),ENSMUSG00000000838(Fmr1),ENSMUSG00000000982(Ccl3),ENSMUSG00000001156(Mxd1),ENSMUSG00000001288(Rarg),ENSMUSG00000001348(Acp5),ENSMUSG00000001416(Cct3),ENSMUSG00000001542(Ell2),ENSMUSG000000…	ENSMUSG00000000028(Cdc45),ENSMUSG00000000282(Mnt),ENSMUSG00000000440(Pparg),ENSMUSG00000000673(Haao),ENSMUSG00000000751(Rpa1),ENSMUSG00000000869(Il4),ENSMUSG00000001120(Pcbp3),ENSMUSG00000001228(Uhrf1),ENSMUSG00000001419(Mef2d),ENSMUSG00000001755(Coasy),ENSMUSG00000001761(Smo),ENSMUSG00000002409(Dyrk1b),ENSMUSG00000002486(Tchp),ENSMUSG00000002617(Zfp40),ENSMUSG00000002625(Akap8l),ENSMUSG000000027…
BP	GO:1901576	organic substance biosynthetic process	751	819	1570	5692	1.99272e-31	3.94606e-29	ENSMUSG00000000078(Klf6),ENSMUSG00000000247(Lhx2),ENSMUSG00000000275(Trim25),ENSMUSG00000000532(Acvr1b),ENSMUSG00000000568(Hnrnpd),ENSMUSG00000000708(Kat2b),ENSMUSG00000000730(Dnmt3l),ENSMUSG00000000776(Polr3d),ENSMUSG00000000838(Fmr1),ENSMUSG00000000982(Ccl3),ENSMUSG00000001156(Mxd1),ENSMUSG00000001288(Rarg),ENSMUSG00000001416(Cct3),ENSMUSG00000001467(Cyp51),ENSMUSG00000001542(Ell2),ENSMUSG00000…	ENSMUSG00000000028(Cdc45),ENSMUSG00000000282(Mnt),ENSMUSG00000000440(Pparg),ENSMUSG00000000673(Haao),ENSMUSG00000000751(Rpa1),ENSMUSG00000000869(Il4),ENSMUSG00000001120(Pcbp3),ENSMUSG00000001228(Uhrf1),ENSMUSG00000001419(Mef2d),ENSMUSG00000001755(Coasy),ENSMUSG00000001761(Smo),ENSMUSG00000002409(Dyrk1b),ENSMUSG00000002486(Tchp),ENSMUSG00000002617(Zfp40),ENSMUSG00000002625(Akap8l),ENSMUSG000000027…
BP	GO:1902531	regulation of intracellular signal transduction	343	195	538	1572	6.39171e-31	1.25064e-28	ENSMUSG00000000275(Trim25),ENSMUSG00000000409(Lck),ENSMUSG00000000982(Ccl3),ENSMUSG00000001098(Kctd10),ENSMUSG00000001175(Calm1),ENSMUSG00000001707(Eef1e1),ENSMUSG00000002413(Braf),ENSMUSG00000002602(Axl),ENSMUSG00000002997(Prkar2b),ENSMUSG00000003119(Cdk12),ENSMUSG00000003208(Yju2),ENSMUSG00000003269(Cyth2),ENSMUSG00000004085(Map3k20),ENSMUSG00000004221(Ikbkg),ENSMUSG00000004266(Ptpn6),ENSMUSG00…	ENSMUSG00000000149(Gna12),ENSMUSG00000001366(Fbxo9),ENSMUSG00000001995(Sipa1l2),ENSMUSG00000002083(Bbc3),ENSMUSG00000002731(Prkra),ENSMUSG00000003190(Bcl2l12),ENSMUSG00000003518(Dusp3),ENSMUSG00000004633(Chn2),ENSMUSG00000005045(Chd5),ENSMUSG00000005534(Insr),ENSMUSG00000005583(Mef2c),ENSMUSG00000006235(Epor),ENSMUSG00000006575(Rundc3a),ENSMUSG00000007613(Tgfbr1),ENSMUSG00000008305(Tle1),ENSMUSG0…
MF	GO:1901363	heterocyclic compound binding	754	779	1533	5557	1.34813e-30	2.60681e-28	ENSMUSG00000000001(Gnai3),ENSMUSG00000000078(Klf6),ENSMUSG00000000247(Lhx2),ENSMUSG00000000409(Lck),ENSMUSG00000000532(Acvr1b),ENSMUSG00000000568(Hnrnpd),ENSMUSG00000000628(Hk2),ENSMUSG00000000708(Kat2b),ENSMUSG00000000776(Polr3d),ENSMUSG00000000838(Fmr1),ENSMUSG00000001156(Mxd1),ENSMUSG00000001166(Oas1c),ENSMUSG00000001168(Oas1h),ENSMUSG00000001288(Rarg),ENSMUSG00000001416(Cct3),ENSMUSG000000014…	ENSMUSG00000000028(Cdc45),ENSMUSG00000000149(Gna12),ENSMUSG00000000282(Mnt),ENSMUSG00000000440(Pparg),ENSMUSG00000000631(Myo18a),ENSMUSG00000000751(Rpa1),ENSMUSG00000001120(Pcbp3),ENSMUSG00000001228(Uhrf1),ENSMUSG00000001419(Mef2d),ENSMUSG00000001436(Slc19a1),ENSMUSG00000001755(Coasy),ENSMUSG00000001827(Folr1),ENSMUSG00000002109(Ddb2),ENSMUSG00000002308(Cd320),ENSMUSG00000002409(Dyrk1b),ENSMUSG00…
BP	GO:0048584	positive regulation of response to stimulus	448	241	689	2151	6.25609e-30	1.19564e-27	ENSMUSG00000000275(Trim25),ENSMUSG00000000409(Lck),ENSMUSG00000000532(Acvr1b),ENSMUSG00000000732(Icosl),ENSMUSG00000000776(Polr3d),ENSMUSG00000000791(Il12rb1),ENSMUSG00000000915(Hip1r),ENSMUSG00000000982(Ccl3),ENSMUSG00000001123(Lgals9),ENSMUSG00000001175(Calm1),ENSMUSG00000001707(Eef1e1),ENSMUSG00000002413(Braf),ENSMUSG00000002602(Axl),ENSMUSG00000002699(Lcp2),ENSMUSG00000002897(Il17ra),ENSMUSG0…	ENSMUSG00000000869(Il4),ENSMUSG00000001036(Epn2),ENSMUSG00000001741(Il16),ENSMUSG00000001761(Smo),ENSMUSG00000002083(Bbc3),ENSMUSG00000002731(Prkra),ENSMUSG00000003518(Dusp3),ENSMUSG00000003882(Il7r),ENSMUSG00000005045(Chd5),ENSMUSG00000005102(Eif2ak4),ENSMUSG00000005514(Por),ENSMUSG00000005534(Insr),ENSMUSG00000005583(Mef2c),ENSMUSG00000005718(Tfap4),ENSMUSG00000006235(Epor),ENSMUSG00000006435(N…
BP	GO:0010468	regulation of gene expression	750	583	1333	4736	1.03433e-29	1.95406e-27	ENSMUSG00000000078(Klf6),ENSMUSG00000000247(Lhx2),ENSMUSG00000000275(Trim25),ENSMUSG00000000409(Lck),ENSMUSG00000000532(Acvr1b),ENSMUSG00000000568(Hnrnpd),ENSMUSG00000000708(Kat2b),ENSMUSG00000000730(Dnmt3l),ENSMUSG00000000732(Icosl),ENSMUSG00000000776(Polr3d),ENSMUSG00000000791(Il12rb1),ENSMUSG00000000838(Fmr1),ENSMUSG00000000957(Mmp14),ENSMUSG00000000982(Ccl3),ENSMUSG00000001123(Lgals9),ENSMUSG…	ENSMUSG00000000028(Cdc45),ENSMUSG00000000282(Mnt),ENSMUSG00000000440(Pparg),ENSMUSG00000000869(Il4),ENSMUSG00000001120(Pcbp3),ENSMUSG00000001228(Uhrf1),ENSMUSG00000001419(Mef2d),ENSMUSG00000001741(Il16),ENSMUSG00000001761(Smo),ENSMUSG00000002409(Dyrk1b),ENSMUSG00000002486(Tchp),ENSMUSG00000002617(Zfp40),ENSMUSG00000002625(Akap8l),ENSMUSG00000002731(Prkra),ENSMUSG00000002968(Med25),ENSMUSG00000003…
BP	GO:0019538	protein metabolic process	865	669	1534	5580	1.10588e-29	2.06548e-27	ENSMUSG00000000184(Ccnd2),ENSMUSG00000000275(Trim25),ENSMUSG00000000385(Tmprss2),ENSMUSG00000000409(Lck),ENSMUSG00000000532(Acvr1b),ENSMUSG00000000555(Itga5),ENSMUSG00000000568(Hnrnpd),ENSMUSG00000000708(Kat2b),ENSMUSG00000000791(Il12rb1),ENSMUSG00000000838(Fmr1),ENSMUSG00000000915(Hip1r),ENSMUSG00000000957(Mmp14),ENSMUSG00000000982(Ccl3),ENSMUSG00000000983(Wfdc18),ENSMUSG00000001098(Kctd10),ENSM…	ENSMUSG00000000149(Gna12),ENSMUSG00000000440(Pparg),ENSMUSG00000000869(Il4),ENSMUSG00000001054(Rmnd5b),ENSMUSG00000001228(Uhrf1),ENSMUSG00000001366(Fbxo9),ENSMUSG00000001865(Cpa3),ENSMUSG00000002083(Bbc3),ENSMUSG00000002109(Ddb2),ENSMUSG00000002228(Ppm1j),ENSMUSG00000002329(Mdp1),ENSMUSG00000002409(Dyrk1b),ENSMUSG00000002625(Akap8l),ENSMUSG00000002731(Prkra),ENSMUSG00000002767(Mrpl2),ENSMUSG00000…
BP	GO:0051179	localization	856	769	1625	5970	1.55222e-29	2.86655e-27	ENSMUSG00000000001(Gnai3),ENSMUSG00000000275(Trim25),ENSMUSG00000000385(Tmprss2),ENSMUSG00000000409(Lck),ENSMUSG00000000532(Acvr1b),ENSMUSG00000000555(Itga5),ENSMUSG00000000600(Krit1),ENSMUSG00000000628(Hk2),ENSMUSG00000000915(Hip1r),ENSMUSG00000000957(Mmp14),ENSMUSG00000000982(Ccl3),ENSMUSG00000001052(Sec24b),ENSMUSG00000001123(Lgals9),ENSMUSG00000001175(Calm1),ENSMUSG00000001248(Gramd1a),ENSMUS…	ENSMUSG00000000149(Gna12),ENSMUSG00000000326(Comt),ENSMUSG00000000440(Pparg),ENSMUSG00000000631(Myo18a),ENSMUSG00000000751(Rpa1),ENSMUSG00000000869(Il4),ENSMUSG00000001036(Epn2),ENSMUSG00000001138(Cnnm3),ENSMUSG00000001143(Lman2l),ENSMUSG00000001227(Sema6b),ENSMUSG00000001436(Slc19a1),ENSMUSG00000001482(Def8),ENSMUSG00000001741(Il16),ENSMUSG00000001761(Smo),ENSMUSG00000001827(Folr1),ENSMUSG000000…
BP	GO:0043085	positive regulation of catalytic activity	273	183	456	1292	1.78243e-29	3.25511e-27	ENSMUSG00000000001(Gnai3),ENSMUSG00000000184(Ccnd2),ENSMUSG00000000409(Lck),ENSMUSG00000000568(Hnrnpd),ENSMUSG00000000915(Hip1r),ENSMUSG00000000982(Ccl3),ENSMUSG00000001123(Lgals9),ENSMUSG00000001175(Calm1),ENSMUSG00000001768(Rin2),ENSMUSG00000002233(Rhoc),ENSMUSG00000002307(Daxx),ENSMUSG00000002413(Braf),ENSMUSG00000002602(Axl),ENSMUSG00000002699(Lcp2),ENSMUSG00000003226(Ranbp2),ENSMUSG000000039…	ENSMUSG00000000440(Pparg),ENSMUSG00000000869(Il4),ENSMUSG00000001995(Sipa1l2),ENSMUSG00000002083(Bbc3),ENSMUSG00000003134(Tbc1d8),ENSMUSG00000004530(Coro1c),ENSMUSG00000004633(Chn2),ENSMUSG00000005370(Msh6),ENSMUSG00000005514(Por),ENSMUSG00000005534(Insr),ENSMUSG00000005583(Mef2c),ENSMUSG00000005718(Tfap4),ENSMUSG00000005958(Ephb3),ENSMUSG00000006435(Neurl1a),ENSMUSG00000007613(Tgfbr1),ENSMUSG000…
BP	GO:0033554	cellular response to stress	303	294	597	1810	1.86916e-29	3.37599e-27	ENSMUSG00000000275(Trim25),ENSMUSG00000000568(Hnrnpd),ENSMUSG00000000628(Hk2),ENSMUSG00000001441(Npepps),ENSMUSG00000001707(Eef1e1),ENSMUSG00000001786(Fbxo7),ENSMUSG00000002307(Daxx),ENSMUSG00000002413(Braf),ENSMUSG00000002602(Axl),ENSMUSG00000002983(Relb),ENSMUSG00000003208(Yju2),ENSMUSG00000003308(Keap1),ENSMUSG00000003541(Ier3),ENSMUSG00000003746(Man1a),ENSMUSG00000004085(Map3k20),ENSMUSG00000…	ENSMUSG00000000028(Cdc45),ENSMUSG00000000326(Comt),ENSMUSG00000000440(Pparg),ENSMUSG00000000751(Rpa1),ENSMUSG00000001228(Uhrf1),ENSMUSG00000001827(Folr1),ENSMUSG00000002083(Bbc3),ENSMUSG00000002109(Ddb2),ENSMUSG00000002289(Angptl4),ENSMUSG00000002661(Alkbh7),ENSMUSG00000002731(Prkra),ENSMUSG00000002835(Chaf1a),ENSMUSG00000002870(Mcm2),ENSMUSG00000003190(Bcl2l12),ENSMUSG00000003518(Dusp3),ENSMUSG0…
MF	GO:0097159	organic cyclic compound binding	761	788	1549	5653	2.20472e-29	3.93877e-27	ENSMUSG00000000001(Gnai3),ENSMUSG00000000078(Klf6),ENSMUSG00000000247(Lhx2),ENSMUSG00000000409(Lck),ENSMUSG00000000532(Acvr1b),ENSMUSG00000000568(Hnrnpd),ENSMUSG00000000628(Hk2),ENSMUSG00000000708(Kat2b),ENSMUSG00000000776(Polr3d),ENSMUSG00000000838(Fmr1),ENSMUSG00000001156(Mxd1),ENSMUSG00000001166(Oas1c),ENSMUSG00000001168(Oas1h),ENSMUSG00000001248(Gramd1a),ENSMUSG00000001288(Rarg),ENSMUSG000000…	ENSMUSG00000000028(Cdc45),ENSMUSG00000000149(Gna12),ENSMUSG00000000282(Mnt),ENSMUSG00000000440(Pparg),ENSMUSG00000000631(Myo18a),ENSMUSG00000000751(Rpa1),ENSMUSG00000001120(Pcbp3),ENSMUSG00000001228(Uhrf1),ENSMUSG00000001419(Mef2d),ENSMUSG00000001436(Slc19a1),ENSMUSG00000001755(Coasy),ENSMUSG00000001827(Folr1),ENSMUSG00000002109(Ddb2),ENSMUSG00000002308(Cd320),ENSMUSG00000002409(Dyrk1b),ENSMUSG00…
MF	GO:0043168	anion binding	436	429	865	2850	5.11709e-29	9.0435e-27	ENSMUSG00000000001(Gnai3),ENSMUSG00000000409(Lck),ENSMUSG00000000532(Acvr1b),ENSMUSG00000000600(Krit1),ENSMUSG00000000628(Hk2),ENSMUSG00000000915(Hip1r),ENSMUSG00000001416(Cct3),ENSMUSG00000001473(Tubb6),ENSMUSG00000001630(Stk38l),ENSMUSG00000001833(Septin7),ENSMUSG00000002227(Mov10),ENSMUSG00000002233(Rhoc),ENSMUSG00000002413(Braf),ENSMUSG00000002602(Axl),ENSMUSG00000002812(Flii),ENSMUSG00000002…	ENSMUSG00000000149(Gna12),ENSMUSG00000000631(Myo18a),ENSMUSG00000001036(Epn2),ENSMUSG00000001436(Slc19a1),ENSMUSG00000001755(Coasy),ENSMUSG00000001827(Folr1),ENSMUSG00000002409(Dyrk1b),ENSMUSG00000002870(Mcm2),ENSMUSG00000003526(Prodh),ENSMUSG00000003809(Gcdh),ENSMUSG00000004032(Gstm5),ENSMUSG00000004187(Kifc2),ENSMUSG00000004347(Pde1c),ENSMUSG00000004768(Rab23),ENSMUSG00000004798(Ulk2),ENSMUSG00…
BP	GO:0050793	regulation of developmental process	474	359	833	2724	5.35664e-29	9.36615e-27	ENSMUSG00000000247(Lhx2),ENSMUSG00000000248(Clec2g),ENSMUSG00000000409(Lck),ENSMUSG00000000532(Acvr1b),ENSMUSG00000000555(Itga5),ENSMUSG00000000600(Krit1),ENSMUSG00000000628(Hk2),ENSMUSG00000000708(Kat2b),ENSMUSG00000000957(Mmp14),ENSMUSG00000000982(Ccl3),ENSMUSG00000001052(Sec24b),ENSMUSG00000001123(Lgals9),ENSMUSG00000001288(Rarg),ENSMUSG00000001300(Efnb2),ENSMUSG00000001627(Ifrd1),ENSMUSG00000…	ENSMUSG00000000149(Gna12),ENSMUSG00000000440(Pparg),ENSMUSG00000000869(Il4),ENSMUSG00000001036(Epn2),ENSMUSG00000001227(Sema6b),ENSMUSG00000001761(Smo),ENSMUSG00000002274(Metrn),ENSMUSG00000003190(Bcl2l12),ENSMUSG00000003282(Plag1),ENSMUSG00000003575(Crtc1),ENSMUSG00000003882(Il7r),ENSMUSG00000004099(Dnmt1),ENSMUSG00000004462(Tbccd1),ENSMUSG00000004530(Coro1c),ENSMUSG00000004798(Ulk2),ENSMUSG0000…
BP	GO:0009892	negative regulation of metabolic process	513	425	938	3141	6.32654e-29	1.09456e-26	ENSMUSG00000000247(Lhx2),ENSMUSG00000000532(Acvr1b),ENSMUSG00000000568(Hnrnpd),ENSMUSG00000000628(Hk2),ENSMUSG00000000708(Kat2b),ENSMUSG00000000730(Dnmt3l),ENSMUSG00000000838(Fmr1),ENSMUSG00000000982(Ccl3),ENSMUSG00000000983(Wfdc18),ENSMUSG00000001123(Lgals9),ENSMUSG00000001156(Mxd1),ENSMUSG00000001288(Rarg),ENSMUSG00000001348(Acp5),ENSMUSG00000001467(Cyp51),ENSMUSG00000001785(Pwp1),ENSMUSG000000…	ENSMUSG00000000028(Cdc45),ENSMUSG00000000282(Mnt),ENSMUSG00000000326(Comt),ENSMUSG00000000440(Pparg),ENSMUSG00000000869(Il4),ENSMUSG00000001120(Pcbp3),ENSMUSG00000001228(Uhrf1),ENSMUSG00000001761(Smo),ENSMUSG00000002731(Prkra),ENSMUSG00000002968(Med25),ENSMUSG00000003190(Bcl2l12),ENSMUSG00000003282(Plag1),ENSMUSG00000003421(Nosip),ENSMUSG00000003518(Dusp3),ENSMUSG00000004099(Dnmt1),ENSMUSG0000000…
BP	GO:0008219	cell death	406	259	665	2076	7.767e-29	1.32978e-26	ENSMUSG00000000001(Gnai3),ENSMUSG00000000184(Ccnd2),ENSMUSG00000000409(Lck),ENSMUSG00000000532(Acvr1b),ENSMUSG00000000555(Itga5),ENSMUSG00000000600(Krit1),ENSMUSG00000000628(Hk2),ENSMUSG00000000915(Hip1r),ENSMUSG00000000982(Ccl3),ENSMUSG00000001288(Rarg),ENSMUSG00000001300(Efnb2),ENSMUSG00000001435(Col18a1),ENSMUSG00000001707(Eef1e1),ENSMUSG00000001786(Fbxo7),ENSMUSG00000002103(Acp2),ENSMUSG00000…	ENSMUSG00000000282(Mnt),ENSMUSG00000000440(Pparg),ENSMUSG00000000631(Myo18a),ENSMUSG00000000869(Il4),ENSMUSG00000001419(Mef2d),ENSMUSG00000001761(Smo),ENSMUSG00000002083(Bbc3),ENSMUSG00000002289(Angptl4),ENSMUSG00000002486(Tchp),ENSMUSG00000002661(Alkbh7),ENSMUSG00000002731(Prkra),ENSMUSG00000002870(Mcm2),ENSMUSG00000003190(Bcl2l12),ENSMUSG00000003378(Grik5),ENSMUSG00000003812(Dnase2a),ENSMUSG000…
MF	GO:0000166	nucleotide binding	341	347	688	2166	1.04711e-28	1.75615e-26	ENSMUSG00000000001(Gnai3),ENSMUSG00000000409(Lck),ENSMUSG00000000532(Acvr1b),ENSMUSG00000000628(Hk2),ENSMUSG00000001416(Cct3),ENSMUSG00000001473(Tubb6),ENSMUSG00000001630(Stk38l),ENSMUSG00000001833(Septin7),ENSMUSG00000002227(Mov10),ENSMUSG00000002233(Rhoc),ENSMUSG00000002413(Braf),ENSMUSG00000002602(Axl),ENSMUSG00000002997(Prkar2b),ENSMUSG00000003119(Cdk12),ENSMUSG00000003283(Hck),ENSMUSG0000000…	ENSMUSG00000000149(Gna12),ENSMUSG00000000631(Myo18a),ENSMUSG00000001228(Uhrf1),ENSMUSG00000001436(Slc19a1),ENSMUSG00000001755(Coasy),ENSMUSG00000002409(Dyrk1b),ENSMUSG00000002870(Mcm2),ENSMUSG00000003526(Prodh),ENSMUSG00000003809(Gcdh),ENSMUSG00000004099(Dnmt1),ENSMUSG00000004187(Kifc2),ENSMUSG00000004347(Pde1c),ENSMUSG00000004768(Rab23),ENSMUSG00000004798(Ulk2),ENSMUSG00000004933(Matk),ENSMUSG00…
MF	GO:1901265	nucleoside phosphate binding	341	347	688	2166	1.04711e-28	1.75615e-26	ENSMUSG00000000001(Gnai3),ENSMUSG00000000409(Lck),ENSMUSG00000000532(Acvr1b),ENSMUSG00000000628(Hk2),ENSMUSG00000001416(Cct3),ENSMUSG00000001473(Tubb6),ENSMUSG00000001630(Stk38l),ENSMUSG00000001833(Septin7),ENSMUSG00000002227(Mov10),ENSMUSG00000002233(Rhoc),ENSMUSG00000002413(Braf),ENSMUSG00000002602(Axl),ENSMUSG00000002997(Prkar2b),ENSMUSG00000003119(Cdk12),ENSMUSG00000003283(Hck),ENSMUSG0000000…	ENSMUSG00000000149(Gna12),ENSMUSG00000000631(Myo18a),ENSMUSG00000001228(Uhrf1),ENSMUSG00000001436(Slc19a1),ENSMUSG00000001755(Coasy),ENSMUSG00000002409(Dyrk1b),ENSMUSG00000002870(Mcm2),ENSMUSG00000003526(Prodh),ENSMUSG00000003809(Gcdh),ENSMUSG00000004099(Dnmt1),ENSMUSG00000004187(Kifc2),ENSMUSG00000004347(Pde1c),ENSMUSG00000004768(Rab23),ENSMUSG00000004798(Ulk2),ENSMUSG00000004933(Matk),ENSMUSG00…
BP	GO:0009889	regulation of biosynthetic process	611	562	1173	4110	4.47507e-28	7.42952e-26	ENSMUSG00000000078(Klf6),ENSMUSG00000000247(Lhx2),ENSMUSG00000000275(Trim25),ENSMUSG00000000532(Acvr1b),ENSMUSG00000000568(Hnrnpd),ENSMUSG00000000708(Kat2b),ENSMUSG00000000730(Dnmt3l),ENSMUSG00000000838(Fmr1),ENSMUSG00000000982(Ccl3),ENSMUSG00000001156(Mxd1),ENSMUSG00000001288(Rarg),ENSMUSG00000001348(Acp5),ENSMUSG00000001416(Cct3),ENSMUSG00000001542(Ell2),ENSMUSG00000001627(Ifrd1),ENSMUSG0000000…	ENSMUSG00000000028(Cdc45),ENSMUSG00000000282(Mnt),ENSMUSG00000000440(Pparg),ENSMUSG00000000869(Il4),ENSMUSG00000001120(Pcbp3),ENSMUSG00000001228(Uhrf1),ENSMUSG00000001419(Mef2d),ENSMUSG00000001761(Smo),ENSMUSG00000002409(Dyrk1b),ENSMUSG00000002486(Tchp),ENSMUSG00000002617(Zfp40),ENSMUSG00000002625(Akap8l),ENSMUSG00000002968(Med25),ENSMUSG00000003190(Bcl2l12),ENSMUSG00000003282(Plag1),ENSMUSG00000…
BP	GO:0048585	negative regulation of response to stimulus	309	227	536	1602	4.81964e-28	7.92157e-26	ENSMUSG00000000001(Gnai3),ENSMUSG00000000957(Mmp14),ENSMUSG00000001098(Kctd10),ENSMUSG00000001123(Lgals9),ENSMUSG00000001175(Calm1),ENSMUSG00000001348(Acp5),ENSMUSG00000001786(Fbxo7),ENSMUSG00000003208(Yju2),ENSMUSG00000003352(Cacnb3),ENSMUSG00000004221(Ikbkg),ENSMUSG00000004266(Ptpn6),ENSMUSG00000004296(Il12b),ENSMUSG00000004364(Cul3),ENSMUSG00000004446(Bid),ENSMUSG00000004936(Map2k1),ENSMUSG000…	ENSMUSG00000000282(Mnt),ENSMUSG00000000440(Pparg),ENSMUSG00000000869(Il4),ENSMUSG00000001036(Epn2),ENSMUSG00000001227(Sema6b),ENSMUSG00000003190(Bcl2l12),ENSMUSG00000003452(Bicd1),ENSMUSG00000003518(Dusp3),ENSMUSG00000003882(Il7r),ENSMUSG00000004347(Pde1c),ENSMUSG00000005469(Prkaca),ENSMUSG00000006235(Epor),ENSMUSG00000006435(Neurl1a),ENSMUSG00000006800(Sulf2),ENSMUSG00000007613(Tgfbr1),ENSMUSG00…
BP	GO:0006996	organelle organization	514	572	1086	3759	7.68088e-28	1.24993e-25	ENSMUSG00000000001(Gnai3),ENSMUSG00000000568(Hnrnpd),ENSMUSG00000000628(Hk2),ENSMUSG00000000708(Kat2b),ENSMUSG00000000730(Dnmt3l),ENSMUSG00000000915(Hip1r),ENSMUSG00000000982(Ccl3),ENSMUSG00000001052(Sec24b),ENSMUSG00000001175(Calm1),ENSMUSG00000001416(Cct3),ENSMUSG00000001440(Kpnb1),ENSMUSG00000001473(Tubb6),ENSMUSG00000001632(Brpf1),ENSMUSG00000001785(Pwp1),ENSMUSG00000001786(Fbxo7),ENSMUSG0000…	ENSMUSG00000000028(Cdc45),ENSMUSG00000000631(Myo18a),ENSMUSG00000000751(Rpa1),ENSMUSG00000001143(Lman2l),ENSMUSG00000001228(Uhrf1),ENSMUSG00000001751(Naglu),ENSMUSG00000001962(Fam50a),ENSMUSG00000002031(Ift46),ENSMUSG00000002055(Spag5),ENSMUSG00000002083(Bbc3),ENSMUSG00000002109(Ddb2),ENSMUSG00000002486(Tchp),ENSMUSG00000002625(Akap8l),ENSMUSG00000002661(Alkbh7),ENSMUSG00000002835(Chaf1a),ENSMUSG…
BP	GO:0045321	leukocyte activation	221	104	325	851	1.02914e-27	1.65833e-25	ENSMUSG00000000409(Lck),ENSMUSG00000000732(Icosl),ENSMUSG00000000791(Il12rb1),ENSMUSG00000000957(Mmp14),ENSMUSG00000000982(Ccl3),ENSMUSG00000001123(Lgals9),ENSMUSG00000001300(Efnb2),ENSMUSG00000001786(Fbxo7),ENSMUSG00000002111(Spi1),ENSMUSG00000002413(Braf),ENSMUSG00000002602(Axl),ENSMUSG00000002699(Lcp2),ENSMUSG00000002983(Relb),ENSMUSG00000003206(Ebi3),ENSMUSG00000004040(Stat3),ENSMUSG000000040…	ENSMUSG00000000631(Myo18a),ENSMUSG00000000869(Il4),ENSMUSG00000002308(Cd320),ENSMUSG00000003518(Dusp3),ENSMUSG00000003882(Il7r),ENSMUSG00000005102(Eif2ak4),ENSMUSG00000005370(Msh6),ENSMUSG00000005583(Mef2c),ENSMUSG00000005951(Shpk),ENSMUSG00000007476(Lrrc8a),ENSMUSG00000010047(Hyal2),ENSMUSG00000010054(Tusc2),ENSMUSG00000013707(Tnfaip8l2),ENSMUSG00000016493(Cd46),ENSMUSG00000017550(Atad5),ENSMUSG…
BP	GO:0031326	regulation of cellular biosynthetic process	600	553	1153	4038	1.33489e-27	2.11906e-25	ENSMUSG00000000078(Klf6),ENSMUSG00000000247(Lhx2),ENSMUSG00000000275(Trim25),ENSMUSG00000000532(Acvr1b),ENSMUSG00000000568(Hnrnpd),ENSMUSG00000000708(Kat2b),ENSMUSG00000000730(Dnmt3l),ENSMUSG00000000838(Fmr1),ENSMUSG00000000982(Ccl3),ENSMUSG00000001156(Mxd1),ENSMUSG00000001288(Rarg),ENSMUSG00000001348(Acp5),ENSMUSG00000001416(Cct3),ENSMUSG00000001542(Ell2),ENSMUSG00000001627(Ifrd1),ENSMUSG0000000…	ENSMUSG00000000028(Cdc45),ENSMUSG00000000282(Mnt),ENSMUSG00000000440(Pparg),ENSMUSG00000000869(Il4),ENSMUSG00000001120(Pcbp3),ENSMUSG00000001228(Uhrf1),ENSMUSG00000001419(Mef2d),ENSMUSG00000001761(Smo),ENSMUSG00000002409(Dyrk1b),ENSMUSG00000002486(Tchp),ENSMUSG00000002617(Zfp40),ENSMUSG00000002625(Akap8l),ENSMUSG00000002968(Med25),ENSMUSG00000003190(Bcl2l12),ENSMUSG00000003282(Plag1),ENSMUSG00000…
BP	GO:0046483	heterocycle metabolic process	742	772	1514	5545	1.34085e-27	2.11906e-25	ENSMUSG00000000001(Gnai3),ENSMUSG00000000078(Klf6),ENSMUSG00000000247(Lhx2),ENSMUSG00000000275(Trim25),ENSMUSG00000000532(Acvr1b),ENSMUSG00000000568(Hnrnpd),ENSMUSG00000000628(Hk2),ENSMUSG00000000708(Kat2b),ENSMUSG00000000730(Dnmt3l),ENSMUSG00000000732(Icosl),ENSMUSG00000000776(Polr3d),ENSMUSG00000000838(Fmr1),ENSMUSG00000000982(Ccl3),ENSMUSG00000001156(Mxd1),ENSMUSG00000001166(Oas1c),ENSMUSG0000…	ENSMUSG00000000028(Cdc45),ENSMUSG00000000253(Gmpr),ENSMUSG00000000282(Mnt),ENSMUSG00000000440(Pparg),ENSMUSG00000000673(Haao),ENSMUSG00000000751(Rpa1),ENSMUSG00000000869(Il4),ENSMUSG00000001120(Pcbp3),ENSMUSG00000001228(Uhrf1),ENSMUSG00000001419(Mef2d),ENSMUSG00000001755(Coasy),ENSMUSG00000001761(Smo),ENSMUSG00000001827(Folr1),ENSMUSG00000002109(Ddb2),ENSMUSG00000002409(Dyrk1b),ENSMUSG00000002486…
BP	GO:0051246	regulation of protein metabolic process	530	317	847	2806	1.75412e-27	2.74579e-25	ENSMUSG00000000184(Ccnd2),ENSMUSG00000000409(Lck),ENSMUSG00000000532(Acvr1b),ENSMUSG00000000555(Itga5),ENSMUSG00000000568(Hnrnpd),ENSMUSG00000000708(Kat2b),ENSMUSG00000000838(Fmr1),ENSMUSG00000000915(Hip1r),ENSMUSG00000000957(Mmp14),ENSMUSG00000000982(Ccl3),ENSMUSG00000000983(Wfdc18),ENSMUSG00000001123(Lgals9),ENSMUSG00000001175(Calm1),ENSMUSG00000001467(Cyp51),ENSMUSG00000001785(Pwp1),ENSMUSG000…	ENSMUSG00000000149(Gna12),ENSMUSG00000000440(Pparg),ENSMUSG00000000869(Il4),ENSMUSG00000001228(Uhrf1),ENSMUSG00000002083(Bbc3),ENSMUSG00000002625(Akap8l),ENSMUSG00000003190(Bcl2l12),ENSMUSG00000003518(Dusp3),ENSMUSG00000004099(Dnmt1),ENSMUSG00000004530(Coro1c),ENSMUSG00000005102(Eif2ak4),ENSMUSG00000005469(Prkaca),ENSMUSG00000005514(Por),ENSMUSG00000005534(Insr),ENSMUSG00000005583(Mef2c),ENSMUSG0…
BP	GO:0051128	regulation of cellular component organization	411	341	752	2438	3.43423e-27	5.325e-25	ENSMUSG00000000532(Acvr1b),ENSMUSG00000000568(Hnrnpd),ENSMUSG00000000628(Hk2),ENSMUSG00000000708(Kat2b),ENSMUSG00000000915(Hip1r),ENSMUSG00000000957(Mmp14),ENSMUSG00000001052(Sec24b),ENSMUSG00000001175(Calm1),ENSMUSG00000001300(Efnb2),ENSMUSG00000001416(Cct3),ENSMUSG00000001627(Ifrd1),ENSMUSG00000001630(Stk38l),ENSMUSG00000001786(Fbxo7),ENSMUSG00000002111(Spi1),ENSMUSG00000002227(Mov10),ENSMUSG00…	ENSMUSG00000000028(Cdc45),ENSMUSG00000000440(Pparg),ENSMUSG00000000869(Il4),ENSMUSG00000001036(Epn2),ENSMUSG00000001227(Sema6b),ENSMUSG00000001482(Def8),ENSMUSG00000002031(Ift46),ENSMUSG00000002055(Spag5),ENSMUSG00000002083(Bbc3),ENSMUSG00000002274(Metrn),ENSMUSG00000002486(Tchp),ENSMUSG00000002625(Akap8l),ENSMUSG00000002870(Mcm2),ENSMUSG00000002968(Med25),ENSMUSG00000003346(Abhd17a),ENSMUSG00000…
BP	GO:0016310	phosphorylation	413	301	714	2291	3.77299e-27	5.7956e-25	ENSMUSG00000000184(Ccnd2),ENSMUSG00000000409(Lck),ENSMUSG00000000532(Acvr1b),ENSMUSG00000000555(Itga5),ENSMUSG00000000628(Hk2),ENSMUSG00000000708(Kat2b),ENSMUSG00000000791(Il12rb1),ENSMUSG00000000982(Ccl3),ENSMUSG00000001123(Lgals9),ENSMUSG00000001630(Stk38l),ENSMUSG00000001785(Pwp1),ENSMUSG00000001786(Fbxo7),ENSMUSG00000002307(Daxx),ENSMUSG00000002413(Braf),ENSMUSG00000002602(Axl),ENSMUSG0000000…	ENSMUSG00000000869(Il4),ENSMUSG00000001755(Coasy),ENSMUSG00000002409(Dyrk1b),ENSMUSG00000002625(Akap8l),ENSMUSG00000002731(Prkra),ENSMUSG00000003518(Dusp3),ENSMUSG00000004530(Coro1c),ENSMUSG00000004798(Ulk2),ENSMUSG00000004933(Matk),ENSMUSG00000005102(Eif2ak4),ENSMUSG00000005469(Prkaca),ENSMUSG00000005534(Insr),ENSMUSG00000005583(Mef2c),ENSMUSG00000005699(Pard6a),ENSMUSG00000005718(Tfap4),ENSMUSG…
BP	GO:0012501	programmed cell death	372	245	617	1920	4.51358e-27	6.869e-25	ENSMUSG00000000001(Gnai3),ENSMUSG00000000184(Ccnd2),ENSMUSG00000000409(Lck),ENSMUSG00000000532(Acvr1b),ENSMUSG00000000555(Itga5),ENSMUSG00000000600(Krit1),ENSMUSG00000000628(Hk2),ENSMUSG00000000915(Hip1r),ENSMUSG00000000982(Ccl3),ENSMUSG00000001288(Rarg),ENSMUSG00000001435(Col18a1),ENSMUSG00000001707(Eef1e1),ENSMUSG00000002103(Acp2),ENSMUSG00000002111(Spi1),ENSMUSG00000002307(Daxx),ENSMUSG0000000…	ENSMUSG00000000282(Mnt),ENSMUSG00000000440(Pparg),ENSMUSG00000000631(Myo18a),ENSMUSG00000000869(Il4),ENSMUSG00000001419(Mef2d),ENSMUSG00000001761(Smo),ENSMUSG00000002083(Bbc3),ENSMUSG00000002289(Angptl4),ENSMUSG00000002486(Tchp),ENSMUSG00000002661(Alkbh7),ENSMUSG00000002731(Prkra),ENSMUSG00000002870(Mcm2),ENSMUSG00000003190(Bcl2l12),ENSMUSG00000003378(Grik5),ENSMUSG00000003812(Dnase2a),ENSMUSG000…
MF	GO:0032555	purine ribonucleotide binding	315	298	613	1905	4.64984e-27	7.01144e-25	ENSMUSG00000000001(Gnai3),ENSMUSG00000000409(Lck),ENSMUSG00000000532(Acvr1b),ENSMUSG00000000628(Hk2),ENSMUSG00000001416(Cct3),ENSMUSG00000001473(Tubb6),ENSMUSG00000001630(Stk38l),ENSMUSG00000001833(Septin7),ENSMUSG00000002227(Mov10),ENSMUSG00000002233(Rhoc),ENSMUSG00000002413(Braf),ENSMUSG00000002602(Axl),ENSMUSG00000002997(Prkar2b),ENSMUSG00000003119(Cdk12),ENSMUSG00000003283(Hck),ENSMUSG0000000…	ENSMUSG00000000149(Gna12),ENSMUSG00000000631(Myo18a),ENSMUSG00000001436(Slc19a1),ENSMUSG00000001755(Coasy),ENSMUSG00000002409(Dyrk1b),ENSMUSG00000002870(Mcm2),ENSMUSG00000003809(Gcdh),ENSMUSG00000004187(Kifc2),ENSMUSG00000004347(Pde1c),ENSMUSG00000004768(Rab23),ENSMUSG00000004798(Ulk2),ENSMUSG00000004933(Matk),ENSMUSG00000005045(Chd5),ENSMUSG00000005102(Eif2ak4),ENSMUSG00000005370(Msh6),ENSMUSG00…
BP	GO:0032268	regulation of cellular protein metabolic process	508	300	808	2660	4.82675e-27	7.17257e-25	ENSMUSG00000000184(Ccnd2),ENSMUSG00000000409(Lck),ENSMUSG00000000532(Acvr1b),ENSMUSG00000000555(Itga5),ENSMUSG00000000568(Hnrnpd),ENSMUSG00000000708(Kat2b),ENSMUSG00000000838(Fmr1),ENSMUSG00000000915(Hip1r),ENSMUSG00000000957(Mmp14),ENSMUSG00000000982(Ccl3),ENSMUSG00000000983(Wfdc18),ENSMUSG00000001123(Lgals9),ENSMUSG00000001175(Calm1),ENSMUSG00000001785(Pwp1),ENSMUSG00000001786(Fbxo7),ENSMUSG000…	ENSMUSG00000000149(Gna12),ENSMUSG00000000440(Pparg),ENSMUSG00000000869(Il4),ENSMUSG00000001228(Uhrf1),ENSMUSG00000002083(Bbc3),ENSMUSG00000002625(Akap8l),ENSMUSG00000003190(Bcl2l12),ENSMUSG00000003518(Dusp3),ENSMUSG00000004099(Dnmt1),ENSMUSG00000004530(Coro1c),ENSMUSG00000005102(Eif2ak4),ENSMUSG00000005469(Prkaca),ENSMUSG00000005514(Por),ENSMUSG00000005534(Insr),ENSMUSG00000005583(Mef2c),ENSMUSG0…
CC	GO:0043228	non-membrane-bounded organelle	635	710	1345	4872	4.84397e-27	7.17257e-25	ENSMUSG00000000001(Gnai3),ENSMUSG00000000078(Klf6),ENSMUSG00000000184(Ccnd2),ENSMUSG00000000275(Trim25),ENSMUSG00000000409(Lck),ENSMUSG00000000568(Hnrnpd),ENSMUSG00000000600(Krit1),ENSMUSG00000000628(Hk2),ENSMUSG00000000708(Kat2b),ENSMUSG00000000730(Dnmt3l),ENSMUSG00000000732(Icosl),ENSMUSG00000000838(Fmr1),ENSMUSG00000000915(Hip1r),ENSMUSG00000000957(Mmp14),ENSMUSG00000001156(Mxd1),ENSMUSG000000…	ENSMUSG00000000028(Cdc45),ENSMUSG00000000056(Narf),ENSMUSG00000000282(Mnt),ENSMUSG00000000631(Myo18a),ENSMUSG00000000751(Rpa1),ENSMUSG00000001228(Uhrf1),ENSMUSG00000001419(Mef2d),ENSMUSG00000002031(Ift46),ENSMUSG00000002055(Spag5),ENSMUSG00000002257(Def6),ENSMUSG00000002409(Dyrk1b),ENSMUSG00000002486(Tchp),ENSMUSG00000002625(Akap8l),ENSMUSG00000002767(Mrpl2),ENSMUSG00000002835(Chaf1a),ENSMUSG0000…
BP	GO:0006915	apoptotic process	364	241	605	1875	4.89719e-27	7.18663e-25	ENSMUSG00000000001(Gnai3),ENSMUSG00000000184(Ccnd2),ENSMUSG00000000409(Lck),ENSMUSG00000000532(Acvr1b),ENSMUSG00000000555(Itga5),ENSMUSG00000000600(Krit1),ENSMUSG00000000628(Hk2),ENSMUSG00000000915(Hip1r),ENSMUSG00000000982(Ccl3),ENSMUSG00000001288(Rarg),ENSMUSG00000001435(Col18a1),ENSMUSG00000001707(Eef1e1),ENSMUSG00000002111(Spi1),ENSMUSG00000002307(Daxx),ENSMUSG00000002413(Braf),ENSMUSG0000000…	ENSMUSG00000000282(Mnt),ENSMUSG00000000440(Pparg),ENSMUSG00000000631(Myo18a),ENSMUSG00000000869(Il4),ENSMUSG00000001419(Mef2d),ENSMUSG00000001761(Smo),ENSMUSG00000002083(Bbc3),ENSMUSG00000002289(Angptl4),ENSMUSG00000002486(Tchp),ENSMUSG00000002731(Prkra),ENSMUSG00000002870(Mcm2),ENSMUSG00000003190(Bcl2l12),ENSMUSG00000003378(Grik5),ENSMUSG00000003812(Dnase2a),ENSMUSG00000003882(Il7r),ENSMUSG00000…
BP	GO:0006139	nucleobase-containing compound metabolic process	733	746	1479	5411	5.1507e-27	7.49177e-25	ENSMUSG00000000001(Gnai3),ENSMUSG00000000078(Klf6),ENSMUSG00000000247(Lhx2),ENSMUSG00000000275(Trim25),ENSMUSG00000000532(Acvr1b),ENSMUSG00000000568(Hnrnpd),ENSMUSG00000000628(Hk2),ENSMUSG00000000708(Kat2b),ENSMUSG00000000730(Dnmt3l),ENSMUSG00000000732(Icosl),ENSMUSG00000000776(Polr3d),ENSMUSG00000000838(Fmr1),ENSMUSG00000000982(Ccl3),ENSMUSG00000001156(Mxd1),ENSMUSG00000001166(Oas1c),ENSMUSG0000…	ENSMUSG00000000028(Cdc45),ENSMUSG00000000253(Gmpr),ENSMUSG00000000282(Mnt),ENSMUSG00000000440(Pparg),ENSMUSG00000000673(Haao),ENSMUSG00000000751(Rpa1),ENSMUSG00000000869(Il4),ENSMUSG00000001120(Pcbp3),ENSMUSG00000001228(Uhrf1),ENSMUSG00000001419(Mef2d),ENSMUSG00000001755(Coasy),ENSMUSG00000001761(Smo),ENSMUSG00000002109(Ddb2),ENSMUSG00000002409(Dyrk1b),ENSMUSG00000002486(Tchp),ENSMUSG00000002617(…
MF	GO:0017076	purine nucleotide binding	315	301	616	1919	6.91732e-27	9.97308e-25	ENSMUSG00000000001(Gnai3),ENSMUSG00000000409(Lck),ENSMUSG00000000532(Acvr1b),ENSMUSG00000000628(Hk2),ENSMUSG00000001416(Cct3),ENSMUSG00000001473(Tubb6),ENSMUSG00000001630(Stk38l),ENSMUSG00000001833(Septin7),ENSMUSG00000002227(Mov10),ENSMUSG00000002233(Rhoc),ENSMUSG00000002413(Braf),ENSMUSG00000002602(Axl),ENSMUSG00000002997(Prkar2b),ENSMUSG00000003119(Cdk12),ENSMUSG00000003283(Hck),ENSMUSG0000000…	ENSMUSG00000000149(Gna12),ENSMUSG00000000631(Myo18a),ENSMUSG00000001436(Slc19a1),ENSMUSG00000001755(Coasy),ENSMUSG00000002409(Dyrk1b),ENSMUSG00000002870(Mcm2),ENSMUSG00000003809(Gcdh),ENSMUSG00000004187(Kifc2),ENSMUSG00000004347(Pde1c),ENSMUSG00000004768(Rab23),ENSMUSG00000004798(Ulk2),ENSMUSG00000004933(Matk),ENSMUSG00000005045(Chd5),ENSMUSG00000005102(Eif2ak4),ENSMUSG00000005370(Msh6),ENSMUSG00…
MF	GO:0032553	ribonucleotide binding	316	301	617	1923	7.12804e-27	1.01875e-24	ENSMUSG00000000001(Gnai3),ENSMUSG00000000409(Lck),ENSMUSG00000000532(Acvr1b),ENSMUSG00000000628(Hk2),ENSMUSG00000001416(Cct3),ENSMUSG00000001473(Tubb6),ENSMUSG00000001630(Stk38l),ENSMUSG00000001833(Septin7),ENSMUSG00000002227(Mov10),ENSMUSG00000002233(Rhoc),ENSMUSG00000002413(Braf),ENSMUSG00000002602(Axl),ENSMUSG00000002997(Prkar2b),ENSMUSG00000003119(Cdk12),ENSMUSG00000003283(Hck),ENSMUSG0000000…	ENSMUSG00000000149(Gna12),ENSMUSG00000000631(Myo18a),ENSMUSG00000001436(Slc19a1),ENSMUSG00000001755(Coasy),ENSMUSG00000002409(Dyrk1b),ENSMUSG00000002870(Mcm2),ENSMUSG00000003809(Gcdh),ENSMUSG00000004187(Kifc2),ENSMUSG00000004347(Pde1c),ENSMUSG00000004768(Rab23),ENSMUSG00000004798(Ulk2),ENSMUSG00000004933(Matk),ENSMUSG00000005045(Chd5),ENSMUSG00000005102(Eif2ak4),ENSMUSG00000005370(Msh6),ENSMUSG00…
BP	GO:0010033	response to organic substance	642	337	979	3345	7.19586e-27	1.01958e-24	ENSMUSG00000000001(Gnai3),ENSMUSG00000000275(Trim25),ENSMUSG00000000532(Acvr1b),ENSMUSG00000000568(Hnrnpd),ENSMUSG00000000628(Hk2),ENSMUSG00000000708(Kat2b),ENSMUSG00000000791(Il12rb1),ENSMUSG00000000957(Mmp14),ENSMUSG00000000982(Ccl3),ENSMUSG00000001123(Lgals9),ENSMUSG00000001175(Calm1),ENSMUSG00000001248(Gramd1a),ENSMUSG00000001288(Rarg),ENSMUSG00000001348(Acp5),ENSMUSG00000001663(Gstt1),ENSMUS…	ENSMUSG00000000326(Comt),ENSMUSG00000000440(Pparg),ENSMUSG00000000631(Myo18a),ENSMUSG00000000869(Il4),ENSMUSG00000001036(Epn2),ENSMUSG00000001761(Smo),ENSMUSG00000001827(Folr1),ENSMUSG00000002870(Mcm2),ENSMUSG00000003378(Grik5),ENSMUSG00000003518(Dusp3),ENSMUSG00000003882(Il7r),ENSMUSG00000004071(Cdip1),ENSMUSG00000004099(Dnmt1),ENSMUSG00000004347(Pde1c),ENSMUSG00000005102(Eif2ak4),ENSMUSG0000000…
BP	GO:0032103	positive regulation of response to external stimulus	150	37	187	409	7.68437e-27	1.07949e-24	ENSMUSG00000000776(Polr3d),ENSMUSG00000000982(Ccl3),ENSMUSG00000001123(Lgals9),ENSMUSG00000002413(Braf),ENSMUSG00000002897(Il17ra),ENSMUSG00000004040(Stat3),ENSMUSG00000004043(Stat5a),ENSMUSG00000004296(Il12b),ENSMUSG00000009376(Met),ENSMUSG00000010358(Ifi35),ENSMUSG00000014599(Csf1),ENSMUSG00000015305(Sash1),ENSMUSG00000015316(Slamf1),ENSMUSG00000015947(Fcgr1),ENSMUSG00000016206(H2-M3),ENSMUSG00…	ENSMUSG00000000869(Il4),ENSMUSG00000001741(Il16),ENSMUSG00000010047(Hyal2),ENSMUSG00000014158(Trpv4),ENSMUSG00000020399(Havcr2),ENSMUSG00000021508(Cxcl14),ENSMUSG00000022471(Xrcc6),ENSMUSG00000022672(Prkdc),ENSMUSG00000022676(Snai2),ENSMUSG00000024962(Vegfb),ENSMUSG00000024975(Pdcd4),ENSMUSG00000026012(Cd28),ENSMUSG00000026792(Lrsam1),ENSMUSG00000027239(Mdk),ENSMUSG00000028456(Unc13b),ENSMUSG0000…
BP	GO:0034641	cellular nitrogen compound metabolic process	812	845	1657	6174	7.8395e-27	1.09195e-24	ENSMUSG00000000001(Gnai3),ENSMUSG00000000078(Klf6),ENSMUSG00000000247(Lhx2),ENSMUSG00000000275(Trim25),ENSMUSG00000000532(Acvr1b),ENSMUSG00000000568(Hnrnpd),ENSMUSG00000000628(Hk2),ENSMUSG00000000708(Kat2b),ENSMUSG00000000730(Dnmt3l),ENSMUSG00000000732(Icosl),ENSMUSG00000000776(Polr3d),ENSMUSG00000000838(Fmr1),ENSMUSG00000000982(Ccl3),ENSMUSG00000001156(Mxd1),ENSMUSG00000001166(Oas1c),ENSMUSG0000…	ENSMUSG00000000028(Cdc45),ENSMUSG00000000253(Gmpr),ENSMUSG00000000282(Mnt),ENSMUSG00000000326(Comt),ENSMUSG00000000440(Pparg),ENSMUSG00000000673(Haao),ENSMUSG00000000751(Rpa1),ENSMUSG00000000869(Il4),ENSMUSG00000001120(Pcbp3),ENSMUSG00000001228(Uhrf1),ENSMUSG00000001419(Mef2d),ENSMUSG00000001665(Gstt3),ENSMUSG00000001755(Coasy),ENSMUSG00000001761(Smo),ENSMUSG00000001827(Folr1),ENSMUSG00000002109(…
MF	GO:0035639	purine ribonucleoside triphosphate binding	306	286	592	1829	8.08302e-27	1.11641e-24	ENSMUSG00000000001(Gnai3),ENSMUSG00000000409(Lck),ENSMUSG00000000532(Acvr1b),ENSMUSG00000000628(Hk2),ENSMUSG00000001416(Cct3),ENSMUSG00000001473(Tubb6),ENSMUSG00000001630(Stk38l),ENSMUSG00000001833(Septin7),ENSMUSG00000002227(Mov10),ENSMUSG00000002233(Rhoc),ENSMUSG00000002413(Braf),ENSMUSG00000002602(Axl),ENSMUSG00000003119(Cdk12),ENSMUSG00000003283(Hck),ENSMUSG00000003752(Itpkc),ENSMUSG000000038…	ENSMUSG00000000149(Gna12),ENSMUSG00000000631(Myo18a),ENSMUSG00000001755(Coasy),ENSMUSG00000002409(Dyrk1b),ENSMUSG00000002870(Mcm2),ENSMUSG00000004187(Kifc2),ENSMUSG00000004768(Rab23),ENSMUSG00000004798(Ulk2),ENSMUSG00000004933(Matk),ENSMUSG00000005045(Chd5),ENSMUSG00000005102(Eif2ak4),ENSMUSG00000005370(Msh6),ENSMUSG00000005469(Prkaca),ENSMUSG00000005534(Insr),ENSMUSG00000005580(Adcy9),ENSMUSG000…
CC	GO:0043232	intracellular non-membrane-bounded organelle	630	708	1338	4857	1.98394e-26	2.71734e-24	ENSMUSG00000000001(Gnai3),ENSMUSG00000000078(Klf6),ENSMUSG00000000184(Ccnd2),ENSMUSG00000000275(Trim25),ENSMUSG00000000409(Lck),ENSMUSG00000000568(Hnrnpd),ENSMUSG00000000600(Krit1),ENSMUSG00000000628(Hk2),ENSMUSG00000000708(Kat2b),ENSMUSG00000000730(Dnmt3l),ENSMUSG00000000732(Icosl),ENSMUSG00000000838(Fmr1),ENSMUSG00000000915(Hip1r),ENSMUSG00000000957(Mmp14),ENSMUSG00000001156(Mxd1),ENSMUSG000000…	ENSMUSG00000000028(Cdc45),ENSMUSG00000000056(Narf),ENSMUSG00000000282(Mnt),ENSMUSG00000000631(Myo18a),ENSMUSG00000000751(Rpa1),ENSMUSG00000001228(Uhrf1),ENSMUSG00000001419(Mef2d),ENSMUSG00000002031(Ift46),ENSMUSG00000002055(Spag5),ENSMUSG00000002257(Def6),ENSMUSG00000002409(Dyrk1b),ENSMUSG00000002486(Tchp),ENSMUSG00000002625(Akap8l),ENSMUSG00000002767(Mrpl2),ENSMUSG00000002835(Chaf1a),ENSMUSG0000…
BP	GO:0006725	cellular aromatic compound metabolic process	747	778	1525	5623	2.48506e-26	3.37557e-24	ENSMUSG00000000001(Gnai3),ENSMUSG00000000078(Klf6),ENSMUSG00000000247(Lhx2),ENSMUSG00000000275(Trim25),ENSMUSG00000000532(Acvr1b),ENSMUSG00000000568(Hnrnpd),ENSMUSG00000000628(Hk2),ENSMUSG00000000708(Kat2b),ENSMUSG00000000730(Dnmt3l),ENSMUSG00000000732(Icosl),ENSMUSG00000000776(Polr3d),ENSMUSG00000000838(Fmr1),ENSMUSG00000000982(Ccl3),ENSMUSG00000001156(Mxd1),ENSMUSG00000001166(Oas1c),ENSMUSG0000…	ENSMUSG00000000028(Cdc45),ENSMUSG00000000253(Gmpr),ENSMUSG00000000282(Mnt),ENSMUSG00000000326(Comt),ENSMUSG00000000440(Pparg),ENSMUSG00000000673(Haao),ENSMUSG00000000751(Rpa1),ENSMUSG00000000869(Il4),ENSMUSG00000001120(Pcbp3),ENSMUSG00000001228(Uhrf1),ENSMUSG00000001419(Mef2d),ENSMUSG00000001755(Coasy),ENSMUSG00000001761(Smo),ENSMUSG00000001827(Folr1),ENSMUSG00000002109(Ddb2),ENSMUSG00000002409(D…
BP	GO:0050776	regulation of immune response	200	63	263	655	2.56333e-26	3.45335e-24	ENSMUSG00000000409(Lck),ENSMUSG00000000732(Icosl),ENSMUSG00000000776(Polr3d),ENSMUSG00000000791(Il12rb1),ENSMUSG00000001123(Lgals9),ENSMUSG00000002413(Braf),ENSMUSG00000002699(Lcp2),ENSMUSG00000003352(Cacnb3),ENSMUSG00000004043(Stat5a),ENSMUSG00000004266(Ptpn6),ENSMUSG00000004296(Il12b),ENSMUSG00000005057(Sh2b2),ENSMUSG00000005413(Hmox1),ENSMUSG00000005763(Cd247),ENSMUSG00000005779(Psmb4),ENSMUSG…	ENSMUSG00000000440(Pparg),ENSMUSG00000000869(Il4),ENSMUSG00000003518(Dusp3),ENSMUSG00000003812(Dnase2a),ENSMUSG00000003882(Il7r),ENSMUSG00000005102(Eif2ak4),ENSMUSG00000005583(Mef2c),ENSMUSG00000016493(Cd46),ENSMUSG00000016933(Plcg1),ENSMUSG00000017550(Atad5),ENSMUSG00000017697(Ada),ENSMUSG00000018752(Tnfsfm13),ENSMUSG00000020263(Appl2),ENSMUSG00000020399(Havcr2),ENSMUSG00000021108(Prkch),ENSMUSG…
BP	GO:0009059	macromolecule biosynthetic process	649	666	1315	4739	2.84393e-26	3.80023e-24	ENSMUSG00000000078(Klf6),ENSMUSG00000000247(Lhx2),ENSMUSG00000000275(Trim25),ENSMUSG00000000532(Acvr1b),ENSMUSG00000000568(Hnrnpd),ENSMUSG00000000708(Kat2b),ENSMUSG00000000730(Dnmt3l),ENSMUSG00000000776(Polr3d),ENSMUSG00000000838(Fmr1),ENSMUSG00000000982(Ccl3),ENSMUSG00000001156(Mxd1),ENSMUSG00000001288(Rarg),ENSMUSG00000001416(Cct3),ENSMUSG00000001542(Ell2),ENSMUSG00000001627(Ifrd1),ENSMUSG00000…	ENSMUSG00000000028(Cdc45),ENSMUSG00000000282(Mnt),ENSMUSG00000000440(Pparg),ENSMUSG00000000751(Rpa1),ENSMUSG00000000869(Il4),ENSMUSG00000001120(Pcbp3),ENSMUSG00000001228(Uhrf1),ENSMUSG00000001419(Mef2d),ENSMUSG00000001761(Smo),ENSMUSG00000002409(Dyrk1b),ENSMUSG00000002486(Tchp),ENSMUSG00000002617(Zfp40),ENSMUSG00000002625(Akap8l),ENSMUSG00000002767(Mrpl2),ENSMUSG00000002835(Chaf1a),ENSMUSG0000000…
BP	GO:0001775	cell activation	238	116	354	966	2.99137e-26	3.96501e-24	ENSMUSG00000000409(Lck),ENSMUSG00000000732(Icosl),ENSMUSG00000000791(Il12rb1),ENSMUSG00000000957(Mmp14),ENSMUSG00000000982(Ccl3),ENSMUSG00000001123(Lgals9),ENSMUSG00000001300(Efnb2),ENSMUSG00000001786(Fbxo7),ENSMUSG00000002111(Spi1),ENSMUSG00000002413(Braf),ENSMUSG00000002602(Axl),ENSMUSG00000002699(Lcp2),ENSMUSG00000002897(Il17ra),ENSMUSG00000002983(Relb),ENSMUSG00000003206(Ebi3),ENSMUSG00000004…	ENSMUSG00000000631(Myo18a),ENSMUSG00000000869(Il4),ENSMUSG00000001761(Smo),ENSMUSG00000001930(Vwf),ENSMUSG00000002308(Cd320),ENSMUSG00000003518(Dusp3),ENSMUSG00000003882(Il7r),ENSMUSG00000005102(Eif2ak4),ENSMUSG00000005370(Msh6),ENSMUSG00000005583(Mef2c),ENSMUSG00000005951(Shpk),ENSMUSG00000007476(Lrrc8a),ENSMUSG00000007613(Tgfbr1),ENSMUSG00000010047(Hyal2),ENSMUSG00000010054(Tusc2),ENSMUSG000000…
BP	GO:1901360	organic cyclic compound metabolic process	766	805	1571	5824	3.94297e-26	5.18454e-24	ENSMUSG00000000001(Gnai3),ENSMUSG00000000078(Klf6),ENSMUSG00000000247(Lhx2),ENSMUSG00000000275(Trim25),ENSMUSG00000000532(Acvr1b),ENSMUSG00000000568(Hnrnpd),ENSMUSG00000000628(Hk2),ENSMUSG00000000708(Kat2b),ENSMUSG00000000730(Dnmt3l),ENSMUSG00000000732(Icosl),ENSMUSG00000000776(Polr3d),ENSMUSG00000000838(Fmr1),ENSMUSG00000000982(Ccl3),ENSMUSG00000001156(Mxd1),ENSMUSG00000001166(Oas1c),ENSMUSG0000…	ENSMUSG00000000028(Cdc45),ENSMUSG00000000253(Gmpr),ENSMUSG00000000282(Mnt),ENSMUSG00000000326(Comt),ENSMUSG00000000440(Pparg),ENSMUSG00000000673(Haao),ENSMUSG00000000751(Rpa1),ENSMUSG00000000869(Il4),ENSMUSG00000001120(Pcbp3),ENSMUSG00000001228(Uhrf1),ENSMUSG00000001419(Mef2d),ENSMUSG00000001755(Coasy),ENSMUSG00000001761(Smo),ENSMUSG00000001827(Folr1),ENSMUSG00000002109(Ddb2),ENSMUSG00000002409(D…
BP	GO:0042325	regulation of phosphorylation	326	201	527	1595	4.11196e-26	5.36383e-24	ENSMUSG00000000184(Ccnd2),ENSMUSG00000000409(Lck),ENSMUSG00000000532(Acvr1b),ENSMUSG00000000555(Itga5),ENSMUSG00000000708(Kat2b),ENSMUSG00000000982(Ccl3),ENSMUSG00000001123(Lgals9),ENSMUSG00000001785(Pwp1),ENSMUSG00000001786(Fbxo7),ENSMUSG00000002307(Daxx),ENSMUSG00000002413(Braf),ENSMUSG00000002602(Axl),ENSMUSG00000002699(Lcp2),ENSMUSG00000002997(Prkar2b),ENSMUSG00000003119(Cdk12),ENSMUSG0000000…	ENSMUSG00000000869(Il4),ENSMUSG00000002625(Akap8l),ENSMUSG00000003518(Dusp3),ENSMUSG00000004530(Coro1c),ENSMUSG00000005102(Eif2ak4),ENSMUSG00000005534(Insr),ENSMUSG00000005583(Mef2c),ENSMUSG00000005699(Pard6a),ENSMUSG00000005718(Tfap4),ENSMUSG00000005958(Ephb3),ENSMUSG00000006235(Epor),ENSMUSG00000006362(Cbfa2t3),ENSMUSG00000006435(Neurl1a),ENSMUSG00000007613(Tgfbr1),ENSMUSG00000009621(Vav2),ENSM…
BP	GO:0051338	regulation of transferase activity	211	135	346	943	8.87065e-26	1.14802e-23	ENSMUSG00000000184(Ccnd2),ENSMUSG00000000568(Hnrnpd),ENSMUSG00000000708(Kat2b),ENSMUSG00000001123(Lgals9),ENSMUSG00000001786(Fbxo7),ENSMUSG00000002307(Daxx),ENSMUSG00000002413(Braf),ENSMUSG00000002602(Axl),ENSMUSG00000002699(Lcp2),ENSMUSG00000002997(Prkar2b),ENSMUSG00000003119(Cdk12),ENSMUSG00000003226(Ranbp2),ENSMUSG00000003948(Mmd),ENSMUSG00000004085(Map3k20),ENSMUSG00000004221(Ikbkg),ENSMUSG00…	ENSMUSG00000000440(Pparg),ENSMUSG00000000869(Il4),ENSMUSG00000003518(Dusp3),ENSMUSG00000004530(Coro1c),ENSMUSG00000005534(Insr),ENSMUSG00000005583(Mef2c),ENSMUSG00000005718(Tfap4),ENSMUSG00000005958(Ephb3),ENSMUSG00000006435(Neurl1a),ENSMUSG00000007613(Tgfbr1),ENSMUSG00000009621(Vav2),ENSMUSG00000010047(Hyal2),ENSMUSG00000010057(Nprl2),ENSMUSG00000014426(Map3k4),ENSMUSG00000016349(Eef1a2),ENSMUSG…
BP	GO:0034645	cellular macromolecule biosynthetic process	641	662	1303	4701	9.32087e-26	1.19686e-23	ENSMUSG00000000078(Klf6),ENSMUSG00000000247(Lhx2),ENSMUSG00000000275(Trim25),ENSMUSG00000000532(Acvr1b),ENSMUSG00000000568(Hnrnpd),ENSMUSG00000000708(Kat2b),ENSMUSG00000000730(Dnmt3l),ENSMUSG00000000776(Polr3d),ENSMUSG00000000838(Fmr1),ENSMUSG00000000982(Ccl3),ENSMUSG00000001156(Mxd1),ENSMUSG00000001288(Rarg),ENSMUSG00000001416(Cct3),ENSMUSG00000001542(Ell2),ENSMUSG00000001627(Ifrd1),ENSMUSG00000…	ENSMUSG00000000028(Cdc45),ENSMUSG00000000282(Mnt),ENSMUSG00000000440(Pparg),ENSMUSG00000000751(Rpa1),ENSMUSG00000000869(Il4),ENSMUSG00000001120(Pcbp3),ENSMUSG00000001228(Uhrf1),ENSMUSG00000001419(Mef2d),ENSMUSG00000001761(Smo),ENSMUSG00000002409(Dyrk1b),ENSMUSG00000002486(Tchp),ENSMUSG00000002617(Zfp40),ENSMUSG00000002625(Akap8l),ENSMUSG00000002767(Mrpl2),ENSMUSG00000002835(Chaf1a),ENSMUSG0000000…
BP	GO:0031399	regulation of protein modification process	372	226	598	1868	9.64877e-26	1.22936e-23	ENSMUSG00000000184(Ccnd2),ENSMUSG00000000409(Lck),ENSMUSG00000000532(Acvr1b),ENSMUSG00000000555(Itga5),ENSMUSG00000000708(Kat2b),ENSMUSG00000000982(Ccl3),ENSMUSG00000001123(Lgals9),ENSMUSG00000001175(Calm1),ENSMUSG00000001785(Pwp1),ENSMUSG00000001786(Fbxo7),ENSMUSG00000002111(Spi1),ENSMUSG00000002307(Daxx),ENSMUSG00000002413(Braf),ENSMUSG00000002699(Lcp2),ENSMUSG00000002997(Prkar2b),ENSMUSG000000…	ENSMUSG00000000869(Il4),ENSMUSG00000002625(Akap8l),ENSMUSG00000003518(Dusp3),ENSMUSG00000004099(Dnmt1),ENSMUSG00000004530(Coro1c),ENSMUSG00000005102(Eif2ak4),ENSMUSG00000005534(Insr),ENSMUSG00000005583(Mef2c),ENSMUSG00000005699(Pard6a),ENSMUSG00000005718(Tfap4),ENSMUSG00000006235(Epor),ENSMUSG00000006435(Neurl1a),ENSMUSG00000007613(Tgfbr1),ENSMUSG00000010047(Hyal2),ENSMUSG00000013483(Card14),ENSM…
BP	GO:0010628	positive regulation of gene expression	450	279	729	2375	1.23851e-25	1.56533e-23	ENSMUSG00000000078(Klf6),ENSMUSG00000000247(Lhx2),ENSMUSG00000000275(Trim25),ENSMUSG00000000409(Lck),ENSMUSG00000000532(Acvr1b),ENSMUSG00000000568(Hnrnpd),ENSMUSG00000000708(Kat2b),ENSMUSG00000000732(Icosl),ENSMUSG00000000776(Polr3d),ENSMUSG00000000791(Il12rb1),ENSMUSG00000000957(Mmp14),ENSMUSG00000000982(Ccl3),ENSMUSG00000001123(Lgals9),ENSMUSG00000001288(Rarg),ENSMUSG00000001542(Ell2),ENSMUSG00…	ENSMUSG00000000440(Pparg),ENSMUSG00000000869(Il4),ENSMUSG00000001419(Mef2d),ENSMUSG00000001741(Il16),ENSMUSG00000001761(Smo),ENSMUSG00000002409(Dyrk1b),ENSMUSG00000002617(Zfp40),ENSMUSG00000002625(Akap8l),ENSMUSG00000002968(Med25),ENSMUSG00000003190(Bcl2l12),ENSMUSG00000003282(Plag1),ENSMUSG00000003575(Crtc1),ENSMUSG00000003882(Il7r),ENSMUSG00000003992(Ssbp2),ENSMUSG00000004099(Dnmt1),ENSMUSG0000…
BP	GO:0006468	protein phosphorylation	367	240	607	1904	1.24762e-25	1.56533e-23	ENSMUSG00000000184(Ccnd2),ENSMUSG00000000409(Lck),ENSMUSG00000000532(Acvr1b),ENSMUSG00000000555(Itga5),ENSMUSG00000000708(Kat2b),ENSMUSG00000000791(Il12rb1),ENSMUSG00000000982(Ccl3),ENSMUSG00000001123(Lgals9),ENSMUSG00000001630(Stk38l),ENSMUSG00000001785(Pwp1),ENSMUSG00000001786(Fbxo7),ENSMUSG00000002307(Daxx),ENSMUSG00000002413(Braf),ENSMUSG00000002602(Axl),ENSMUSG00000002699(Lcp2),ENSMUSG000000…	ENSMUSG00000000869(Il4),ENSMUSG00000002409(Dyrk1b),ENSMUSG00000002625(Akap8l),ENSMUSG00000002731(Prkra),ENSMUSG00000003518(Dusp3),ENSMUSG00000004530(Coro1c),ENSMUSG00000004798(Ulk2),ENSMUSG00000004933(Matk),ENSMUSG00000005102(Eif2ak4),ENSMUSG00000005469(Prkaca),ENSMUSG00000005534(Insr),ENSMUSG00000005583(Mef2c),ENSMUSG00000005699(Pard6a),ENSMUSG00000005718(Tfap4),ENSMUSG00000005893(Nr2c2),ENSMUSG…
BP	GO:0007166	cell surface receptor signaling pathway	473	294	767	2526	1.6268e-25	2.02561e-23	ENSMUSG00000000409(Lck),ENSMUSG00000000532(Acvr1b),ENSMUSG00000000555(Itga5),ENSMUSG00000000732(Icosl),ENSMUSG00000000791(Il12rb1),ENSMUSG00000000915(Hip1r),ENSMUSG00000000957(Mmp14),ENSMUSG00000000982(Ccl3),ENSMUSG00000001098(Kctd10),ENSMUSG00000001123(Lgals9),ENSMUSG00000001300(Efnb2),ENSMUSG00000001785(Pwp1),ENSMUSG00000002111(Spi1),ENSMUSG00000002413(Braf),ENSMUSG00000002602(Axl),ENSMUSG00000…	ENSMUSG00000000440(Pparg),ENSMUSG00000000869(Il4),ENSMUSG00000001036(Epn2),ENSMUSG00000001227(Sema6b),ENSMUSG00000001761(Smo),ENSMUSG00000001827(Folr1),ENSMUSG00000002031(Ift46),ENSMUSG00000003190(Bcl2l12),ENSMUSG00000003378(Grik5),ENSMUSG00000003518(Dusp3),ENSMUSG00000003882(Il7r),ENSMUSG00000004071(Cdip1),ENSMUSG00000005469(Prkaca),ENSMUSG00000005514(Por),ENSMUSG00000005534(Insr),ENSMUSG0000000…
BP	GO:0010941	regulation of cell death	342	213	555	1709	1.73799e-25	2.14779e-23	ENSMUSG00000000001(Gnai3),ENSMUSG00000000184(Ccnd2),ENSMUSG00000000409(Lck),ENSMUSG00000000555(Itga5),ENSMUSG00000000600(Krit1),ENSMUSG00000000915(Hip1r),ENSMUSG00000000982(Ccl3),ENSMUSG00000001288(Rarg),ENSMUSG00000001300(Efnb2),ENSMUSG00000001435(Col18a1),ENSMUSG00000001707(Eef1e1),ENSMUSG00000001786(Fbxo7),ENSMUSG00000002307(Daxx),ENSMUSG00000002413(Braf),ENSMUSG00000002602(Axl),ENSMUSG0000000…	ENSMUSG00000000282(Mnt),ENSMUSG00000000440(Pparg),ENSMUSG00000000631(Myo18a),ENSMUSG00000000869(Il4),ENSMUSG00000001761(Smo),ENSMUSG00000002083(Bbc3),ENSMUSG00000002289(Angptl4),ENSMUSG00000002731(Prkra),ENSMUSG00000003190(Bcl2l12),ENSMUSG00000003378(Grik5),ENSMUSG00000003882(Il7r),ENSMUSG00000004099(Dnmt1),ENSMUSG00000005102(Eif2ak4),ENSMUSG00000005514(Por),ENSMUSG00000005583(Mef2c),ENSMUSG00000…
BP	GO:2000026	regulation of multicellular organismal development	382	287	669	2145	1.8972e-25	2.32705e-23	ENSMUSG00000000247(Lhx2),ENSMUSG00000000248(Clec2g),ENSMUSG00000000409(Lck),ENSMUSG00000000532(Acvr1b),ENSMUSG00000000555(Itga5),ENSMUSG00000000600(Krit1),ENSMUSG00000000628(Hk2),ENSMUSG00000000708(Kat2b),ENSMUSG00000000957(Mmp14),ENSMUSG00000000982(Ccl3),ENSMUSG00000001052(Sec24b),ENSMUSG00000001123(Lgals9),ENSMUSG00000001288(Rarg),ENSMUSG00000001300(Efnb2),ENSMUSG00000001627(Ifrd1),ENSMUSG00000…	ENSMUSG00000000440(Pparg),ENSMUSG00000000869(Il4),ENSMUSG00000001036(Epn2),ENSMUSG00000001227(Sema6b),ENSMUSG00000001761(Smo),ENSMUSG00000002274(Metrn),ENSMUSG00000003282(Plag1),ENSMUSG00000003575(Crtc1),ENSMUSG00000003882(Il7r),ENSMUSG00000004099(Dnmt1),ENSMUSG00000004798(Ulk2),ENSMUSG00000005102(Eif2ak4),ENSMUSG00000005469(Prkaca),ENSMUSG00000005514(Por),ENSMUSG00000005534(Insr),ENSMUSG00000005…
BP	GO:0010556	regulation of macromolecule biosynthetic process	572	529	1101	3872	2.06418e-25	2.5131e-23	ENSMUSG00000000078(Klf6),ENSMUSG00000000247(Lhx2),ENSMUSG00000000275(Trim25),ENSMUSG00000000532(Acvr1b),ENSMUSG00000000568(Hnrnpd),ENSMUSG00000000708(Kat2b),ENSMUSG00000000730(Dnmt3l),ENSMUSG00000000838(Fmr1),ENSMUSG00000000982(Ccl3),ENSMUSG00000001156(Mxd1),ENSMUSG00000001288(Rarg),ENSMUSG00000001416(Cct3),ENSMUSG00000001542(Ell2),ENSMUSG00000001627(Ifrd1),ENSMUSG00000001632(Brpf1),ENSMUSG000000…	ENSMUSG00000000028(Cdc45),ENSMUSG00000000282(Mnt),ENSMUSG00000000440(Pparg),ENSMUSG00000000869(Il4),ENSMUSG00000001120(Pcbp3),ENSMUSG00000001228(Uhrf1),ENSMUSG00000001419(Mef2d),ENSMUSG00000001761(Smo),ENSMUSG00000002409(Dyrk1b),ENSMUSG00000002486(Tchp),ENSMUSG00000002617(Zfp40),ENSMUSG00000002625(Akap8l),ENSMUSG00000002968(Med25),ENSMUSG00000003190(Bcl2l12),ENSMUSG00000003282(Plag1),ENSMUSG00000…
BP	GO:0018130	heterocycle biosynthetic process	560	578	1138	4028	3.06954e-25	3.70963e-23	ENSMUSG00000000078(Klf6),ENSMUSG00000000247(Lhx2),ENSMUSG00000000275(Trim25),ENSMUSG00000000532(Acvr1b),ENSMUSG00000000568(Hnrnpd),ENSMUSG00000000708(Kat2b),ENSMUSG00000000730(Dnmt3l),ENSMUSG00000000776(Polr3d),ENSMUSG00000000982(Ccl3),ENSMUSG00000001156(Mxd1),ENSMUSG00000001288(Rarg),ENSMUSG00000001416(Cct3),ENSMUSG00000001542(Ell2),ENSMUSG00000001627(Ifrd1),ENSMUSG00000001632(Brpf1),ENSMUSG0000…	ENSMUSG00000000028(Cdc45),ENSMUSG00000000282(Mnt),ENSMUSG00000000440(Pparg),ENSMUSG00000000673(Haao),ENSMUSG00000000751(Rpa1),ENSMUSG00000000869(Il4),ENSMUSG00000001120(Pcbp3),ENSMUSG00000001228(Uhrf1),ENSMUSG00000001419(Mef2d),ENSMUSG00000001755(Coasy),ENSMUSG00000001761(Smo),ENSMUSG00000002409(Dyrk1b),ENSMUSG00000002486(Tchp),ENSMUSG00000002617(Zfp40),ENSMUSG00000002625(Akap8l),ENSMUSG000000029…
BP	GO:0002831	regulation of response to biotic stimulus	121	24	145	294	4.02731e-25	4.8316e-23	ENSMUSG00000000776(Polr3d),ENSMUSG00000000791(Il12rb1),ENSMUSG00000001123(Lgals9),ENSMUSG00000004043(Stat5a),ENSMUSG00000004296(Il12b),ENSMUSG00000006205(Htra1),ENSMUSG00000010358(Ifi35),ENSMUSG00000015305(Sash1),ENSMUSG00000016206(H2-M3),ENSMUSG00000016496(Cd274),ENSMUSG00000017776(Crk),ENSMUSG00000017830(Dhx58),ENSMUSG00000018160(Med1),ENSMUSG00000018899(Irf1),ENSMUSG00000019471(Cdc37),ENSMUSG0…	ENSMUSG00000000440(Pparg),ENSMUSG00000000869(Il4),ENSMUSG00000005102(Eif2ak4),ENSMUSG00000020263(Appl2),ENSMUSG00000020399(Havcr2),ENSMUSG00000020823(Sec14l1),ENSMUSG00000022471(Xrcc6),ENSMUSG00000022672(Prkdc),ENSMUSG00000026471(Mr1),ENSMUSG00000026792(Lrsam1),ENSMUSG00000027843(Ptpn22),ENSMUSG00000028456(Unc13b),ENSMUSG00000029821(Gsdme),ENSMUSG00000031077(Fadd),ENSMUSG00000032109(Nlrx1),ENSMUS…
BP	GO:0009987	cellular process	2039	2034	4073	17501	4.5466e-25	5.41507e-23	ENSMUSG00000000001(Gnai3),ENSMUSG00000000078(Klf6),ENSMUSG00000000184(Ccnd2),ENSMUSG00000000247(Lhx2),ENSMUSG00000000248(Clec2g),ENSMUSG00000000275(Trim25),ENSMUSG00000000385(Tmprss2),ENSMUSG00000000409(Lck),ENSMUSG00000000532(Acvr1b),ENSMUSG00000000555(Itga5),ENSMUSG00000000568(Hnrnpd),ENSMUSG00000000600(Krit1),ENSMUSG00000000628(Hk2),ENSMUSG00000000682(Cd52),ENSMUSG00000000708(Kat2b),ENSMUSG000…	ENSMUSG00000000028(Cdc45),ENSMUSG00000000149(Gna12),ENSMUSG00000000253(Gmpr),ENSMUSG00000000282(Mnt),ENSMUSG00000000326(Comt),ENSMUSG00000000440(Pparg),ENSMUSG00000000631(Myo18a),ENSMUSG00000000673(Haao),ENSMUSG00000000686(Abhd15),ENSMUSG00000000751(Rpa1),ENSMUSG00000000869(Il4),ENSMUSG00000001036(Epn2),ENSMUSG00000001054(Rmnd5b),ENSMUSG00000001120(Pcbp3),ENSMUSG00000001138(Cnnm3),ENSMUSG00000001…
BP	GO:0031349	positive regulation of defense response	113	23	136	269	5.86815e-25	6.93877e-23	ENSMUSG00000000776(Polr3d),ENSMUSG00000000982(Ccl3),ENSMUSG00000001123(Lgals9),ENSMUSG00000002897(Il17ra),ENSMUSG00000004040(Stat3),ENSMUSG00000004043(Stat5a),ENSMUSG00000004296(Il12b),ENSMUSG00000010358(Ifi35),ENSMUSG00000015947(Fcgr1),ENSMUSG00000016206(H2-M3),ENSMUSG00000017830(Dhx58),ENSMUSG00000018160(Med1),ENSMUSG00000018500(Adora2b),ENSMUSG00000020115(Tbk1),ENSMUSG00000020122(Egfr),ENSMUSG…	ENSMUSG00000001741(Il16),ENSMUSG00000005583(Mef2c),ENSMUSG00000010047(Hyal2),ENSMUSG00000014158(Trpv4),ENSMUSG00000020399(Havcr2),ENSMUSG00000022471(Xrcc6),ENSMUSG00000022672(Prkdc),ENSMUSG00000024975(Pdcd4),ENSMUSG00000026012(Cd28),ENSMUSG00000026792(Lrsam1),ENSMUSG00000027239(Mdk),ENSMUSG00000028456(Unc13b),ENSMUSG00000031077(Fadd),ENSMUSG00000031565(Fgfr1),ENSMUSG00000034957(Cebpa),ENSMUSG0000…
BP	GO:0043067	regulation of programmed cell death	313	200	513	1560	6.91394e-25	8.11697e-23	ENSMUSG00000000001(Gnai3),ENSMUSG00000000184(Ccnd2),ENSMUSG00000000409(Lck),ENSMUSG00000000555(Itga5),ENSMUSG00000000600(Krit1),ENSMUSG00000000915(Hip1r),ENSMUSG00000000982(Ccl3),ENSMUSG00000001288(Rarg),ENSMUSG00000001435(Col18a1),ENSMUSG00000001707(Eef1e1),ENSMUSG00000002413(Braf),ENSMUSG00000002602(Axl),ENSMUSG00000003283(Hck),ENSMUSG00000003541(Ier3),ENSMUSG00000004043(Stat5a),ENSMUSG00000004…	ENSMUSG00000000282(Mnt),ENSMUSG00000000440(Pparg),ENSMUSG00000000631(Myo18a),ENSMUSG00000000869(Il4),ENSMUSG00000001761(Smo),ENSMUSG00000002083(Bbc3),ENSMUSG00000002289(Angptl4),ENSMUSG00000002731(Prkra),ENSMUSG00000003190(Bcl2l12),ENSMUSG00000003378(Grik5),ENSMUSG00000003882(Il7r),ENSMUSG00000004099(Dnmt1),ENSMUSG00000005102(Eif2ak4),ENSMUSG00000005514(Por),ENSMUSG00000005583(Mef2c),ENSMUSG00000…
BP	GO:0051240	positive regulation of multicellular organismal process	378	224	602	1897	7.39228e-25	8.61698e-23	ENSMUSG00000000409(Lck),ENSMUSG00000000532(Acvr1b),ENSMUSG00000000555(Itga5),ENSMUSG00000000628(Hk2),ENSMUSG00000000708(Kat2b),ENSMUSG00000000732(Icosl),ENSMUSG00000000776(Polr3d),ENSMUSG00000000791(Il12rb1),ENSMUSG00000000957(Mmp14),ENSMUSG00000000982(Ccl3),ENSMUSG00000001123(Lgals9),ENSMUSG00000001300(Efnb2),ENSMUSG00000001768(Rin2),ENSMUSG00000002413(Braf),ENSMUSG00000002602(Axl),ENSMUSG000000…	ENSMUSG00000000440(Pparg),ENSMUSG00000000869(Il4),ENSMUSG00000001482(Def8),ENSMUSG00000001741(Il16),ENSMUSG00000001761(Smo),ENSMUSG00000002274(Metrn),ENSMUSG00000003282(Plag1),ENSMUSG00000003575(Crtc1),ENSMUSG00000003882(Il7r),ENSMUSG00000005514(Por),ENSMUSG00000005583(Mef2c),ENSMUSG00000005893(Nr2c2),ENSMUSG00000005958(Ephb3),ENSMUSG00000006235(Epor),ENSMUSG00000006435(Neurl1a),ENSMUSG0000000680…
BP	GO:0010605	negative regulation of macromolecule metabolic process	480	376	856	2892	8.31408e-25	9.62326e-23	ENSMUSG00000000247(Lhx2),ENSMUSG00000000532(Acvr1b),ENSMUSG00000000568(Hnrnpd),ENSMUSG00000000708(Kat2b),ENSMUSG00000000730(Dnmt3l),ENSMUSG00000000838(Fmr1),ENSMUSG00000000982(Ccl3),ENSMUSG00000000983(Wfdc18),ENSMUSG00000001123(Lgals9),ENSMUSG00000001156(Mxd1),ENSMUSG00000001288(Rarg),ENSMUSG00000001348(Acp5),ENSMUSG00000001467(Cyp51),ENSMUSG00000001785(Pwp1),ENSMUSG00000001786(Fbxo7),ENSMUSG0000…	ENSMUSG00000000028(Cdc45),ENSMUSG00000000282(Mnt),ENSMUSG00000000440(Pparg),ENSMUSG00000000869(Il4),ENSMUSG00000001120(Pcbp3),ENSMUSG00000001228(Uhrf1),ENSMUSG00000001761(Smo),ENSMUSG00000002731(Prkra),ENSMUSG00000002968(Med25),ENSMUSG00000003190(Bcl2l12),ENSMUSG00000003282(Plag1),ENSMUSG00000003518(Dusp3),ENSMUSG00000004099(Dnmt1),ENSMUSG00000004530(Coro1c),ENSMUSG00000005045(Chd5),ENSMUSG000000…
BP	GO:0019438	aromatic compound biosynthetic process	561	578	1139	4042	8.40916e-25	9.66525e-23	ENSMUSG00000000078(Klf6),ENSMUSG00000000247(Lhx2),ENSMUSG00000000275(Trim25),ENSMUSG00000000532(Acvr1b),ENSMUSG00000000568(Hnrnpd),ENSMUSG00000000708(Kat2b),ENSMUSG00000000730(Dnmt3l),ENSMUSG00000000776(Polr3d),ENSMUSG00000000982(Ccl3),ENSMUSG00000001156(Mxd1),ENSMUSG00000001288(Rarg),ENSMUSG00000001416(Cct3),ENSMUSG00000001542(Ell2),ENSMUSG00000001627(Ifrd1),ENSMUSG00000001632(Brpf1),ENSMUSG0000…	ENSMUSG00000000028(Cdc45),ENSMUSG00000000282(Mnt),ENSMUSG00000000440(Pparg),ENSMUSG00000000673(Haao),ENSMUSG00000000751(Rpa1),ENSMUSG00000000869(Il4),ENSMUSG00000001120(Pcbp3),ENSMUSG00000001228(Uhrf1),ENSMUSG00000001419(Mef2d),ENSMUSG00000001755(Coasy),ENSMUSG00000001761(Smo),ENSMUSG00000002409(Dyrk1b),ENSMUSG00000002486(Tchp),ENSMUSG00000002617(Zfp40),ENSMUSG00000002625(Akap8l),ENSMUSG000000029…
BP	GO:0051174	regulation of phosphorus metabolic process	352	220	572	1784	8.9474e-25	1.02125e-22	ENSMUSG00000000184(Ccnd2),ENSMUSG00000000409(Lck),ENSMUSG00000000532(Acvr1b),ENSMUSG00000000555(Itga5),ENSMUSG00000000708(Kat2b),ENSMUSG00000000982(Ccl3),ENSMUSG00000001123(Lgals9),ENSMUSG00000001175(Calm1),ENSMUSG00000001785(Pwp1),ENSMUSG00000001786(Fbxo7),ENSMUSG00000002307(Daxx),ENSMUSG00000002413(Braf),ENSMUSG00000002602(Axl),ENSMUSG00000002699(Lcp2),ENSMUSG00000002997(Prkar2b),ENSMUSG0000000…	ENSMUSG00000000869(Il4),ENSMUSG00000002625(Akap8l),ENSMUSG00000003518(Dusp3),ENSMUSG00000004530(Coro1c),ENSMUSG00000005102(Eif2ak4),ENSMUSG00000005534(Insr),ENSMUSG00000005583(Mef2c),ENSMUSG00000005699(Pard6a),ENSMUSG00000005718(Tfap4),ENSMUSG00000005958(Ephb3),ENSMUSG00000006235(Epor),ENSMUSG00000006362(Cbfa2t3),ENSMUSG00000006435(Neurl1a),ENSMUSG00000007613(Tgfbr1),ENSMUSG00000009621(Vav2),ENSM…
BP	GO:1901362	organic cyclic compound biosynthetic process	578	592	1170	4172	1.01676e-24	1.15252e-22	ENSMUSG00000000078(Klf6),ENSMUSG00000000247(Lhx2),ENSMUSG00000000275(Trim25),ENSMUSG00000000532(Acvr1b),ENSMUSG00000000568(Hnrnpd),ENSMUSG00000000708(Kat2b),ENSMUSG00000000730(Dnmt3l),ENSMUSG00000000776(Polr3d),ENSMUSG00000000982(Ccl3),ENSMUSG00000001156(Mxd1),ENSMUSG00000001288(Rarg),ENSMUSG00000001416(Cct3),ENSMUSG00000001467(Cyp51),ENSMUSG00000001542(Ell2),ENSMUSG00000001627(Ifrd1),ENSMUSG0000…	ENSMUSG00000000028(Cdc45),ENSMUSG00000000282(Mnt),ENSMUSG00000000440(Pparg),ENSMUSG00000000673(Haao),ENSMUSG00000000751(Rpa1),ENSMUSG00000000869(Il4),ENSMUSG00000001120(Pcbp3),ENSMUSG00000001228(Uhrf1),ENSMUSG00000001419(Mef2d),ENSMUSG00000001755(Coasy),ENSMUSG00000001761(Smo),ENSMUSG00000002409(Dyrk1b),ENSMUSG00000002486(Tchp),ENSMUSG00000002617(Zfp40),ENSMUSG00000002625(Akap8l),ENSMUSG000000029…
BP	GO:2000112	regulation of cellular macromolecule biosynthetic process	564	525	1089	3839	1.12308e-24	1.26432e-22	ENSMUSG00000000078(Klf6),ENSMUSG00000000247(Lhx2),ENSMUSG00000000275(Trim25),ENSMUSG00000000532(Acvr1b),ENSMUSG00000000568(Hnrnpd),ENSMUSG00000000708(Kat2b),ENSMUSG00000000730(Dnmt3l),ENSMUSG00000000838(Fmr1),ENSMUSG00000000982(Ccl3),ENSMUSG00000001156(Mxd1),ENSMUSG00000001288(Rarg),ENSMUSG00000001416(Cct3),ENSMUSG00000001542(Ell2),ENSMUSG00000001627(Ifrd1),ENSMUSG00000001632(Brpf1),ENSMUSG000000…	ENSMUSG00000000028(Cdc45),ENSMUSG00000000282(Mnt),ENSMUSG00000000440(Pparg),ENSMUSG00000000869(Il4),ENSMUSG00000001120(Pcbp3),ENSMUSG00000001228(Uhrf1),ENSMUSG00000001419(Mef2d),ENSMUSG00000001761(Smo),ENSMUSG00000002409(Dyrk1b),ENSMUSG00000002486(Tchp),ENSMUSG00000002617(Zfp40),ENSMUSG00000002625(Akap8l),ENSMUSG00000002968(Med25),ENSMUSG00000003190(Bcl2l12),ENSMUSG00000003282(Plag1),ENSMUSG00000…
BP	GO:0019220	regulation of phosphate metabolic process	351	220	571	1783	1.36192e-24	1.52276e-22	ENSMUSG00000000184(Ccnd2),ENSMUSG00000000409(Lck),ENSMUSG00000000532(Acvr1b),ENSMUSG00000000555(Itga5),ENSMUSG00000000708(Kat2b),ENSMUSG00000000982(Ccl3),ENSMUSG00000001123(Lgals9),ENSMUSG00000001175(Calm1),ENSMUSG00000001785(Pwp1),ENSMUSG00000001786(Fbxo7),ENSMUSG00000002307(Daxx),ENSMUSG00000002413(Braf),ENSMUSG00000002602(Axl),ENSMUSG00000002699(Lcp2),ENSMUSG00000002997(Prkar2b),ENSMUSG0000000…	ENSMUSG00000000869(Il4),ENSMUSG00000002625(Akap8l),ENSMUSG00000003518(Dusp3),ENSMUSG00000004530(Coro1c),ENSMUSG00000005102(Eif2ak4),ENSMUSG00000005534(Insr),ENSMUSG00000005583(Mef2c),ENSMUSG00000005699(Pard6a),ENSMUSG00000005718(Tfap4),ENSMUSG00000005958(Ephb3),ENSMUSG00000006235(Epor),ENSMUSG00000006362(Cbfa2t3),ENSMUSG00000006435(Neurl1a),ENSMUSG00000007613(Tgfbr1),ENSMUSG00000009621(Vav2),ENSM…
BP	GO:0009968	negative regulation of signal transduction	230	182	412	1192	1.41566e-24	1.57214e-22	ENSMUSG00000000001(Gnai3),ENSMUSG00000000957(Mmp14),ENSMUSG00000001098(Kctd10),ENSMUSG00000001175(Calm1),ENSMUSG00000003208(Yju2),ENSMUSG00000004221(Ikbkg),ENSMUSG00000004266(Ptpn6),ENSMUSG00000004296(Il12b),ENSMUSG00000004364(Cul3),ENSMUSG00000004446(Bid),ENSMUSG00000004936(Map2k1),ENSMUSG00000004952(Rasa4),ENSMUSG00000005087(Cd44),ENSMUSG00000005312(Ubqln1),ENSMUSG00000005413(Hmox1),ENSMUSG0000…	ENSMUSG00000000282(Mnt),ENSMUSG00000000440(Pparg),ENSMUSG00000000869(Il4),ENSMUSG00000001036(Epn2),ENSMUSG00000003190(Bcl2l12),ENSMUSG00000003452(Bicd1),ENSMUSG00000003518(Dusp3),ENSMUSG00000005469(Prkaca),ENSMUSG00000006435(Neurl1a),ENSMUSG00000006800(Sulf2),ENSMUSG00000007613(Tgfbr1),ENSMUSG00000008305(Tle1),ENSMUSG00000010047(Hyal2),ENSMUSG00000010057(Nprl2),ENSMUSG00000010461(Eya4),ENSMUSG000…
BP	GO:0090304	nucleic acid metabolic process	685	668	1353	4942	1.81521e-24	2.00233e-22	ENSMUSG00000000078(Klf6),ENSMUSG00000000247(Lhx2),ENSMUSG00000000275(Trim25),ENSMUSG00000000532(Acvr1b),ENSMUSG00000000568(Hnrnpd),ENSMUSG00000000708(Kat2b),ENSMUSG00000000730(Dnmt3l),ENSMUSG00000000732(Icosl),ENSMUSG00000000776(Polr3d),ENSMUSG00000000838(Fmr1),ENSMUSG00000000982(Ccl3),ENSMUSG00000001156(Mxd1),ENSMUSG00000001166(Oas1c),ENSMUSG00000001168(Oas1h),ENSMUSG00000001288(Rarg),ENSMUSG000…	ENSMUSG00000000028(Cdc45),ENSMUSG00000000282(Mnt),ENSMUSG00000000440(Pparg),ENSMUSG00000000751(Rpa1),ENSMUSG00000000869(Il4),ENSMUSG00000001120(Pcbp3),ENSMUSG00000001228(Uhrf1),ENSMUSG00000001419(Mef2d),ENSMUSG00000001761(Smo),ENSMUSG00000002109(Ddb2),ENSMUSG00000002409(Dyrk1b),ENSMUSG00000002486(Tchp),ENSMUSG00000002617(Zfp40),ENSMUSG00000002625(Akap8l),ENSMUSG00000002731(Prkra),ENSMUSG000000028…
BP	GO:0044271	cellular nitrogen compound biosynthetic process	642	644	1286	4661	1.84815e-24	2.02507e-22	ENSMUSG00000000078(Klf6),ENSMUSG00000000247(Lhx2),ENSMUSG00000000275(Trim25),ENSMUSG00000000532(Acvr1b),ENSMUSG00000000568(Hnrnpd),ENSMUSG00000000708(Kat2b),ENSMUSG00000000730(Dnmt3l),ENSMUSG00000000776(Polr3d),ENSMUSG00000000838(Fmr1),ENSMUSG00000000982(Ccl3),ENSMUSG00000001156(Mxd1),ENSMUSG00000001288(Rarg),ENSMUSG00000001348(Acp5),ENSMUSG00000001416(Cct3),ENSMUSG00000001542(Ell2),ENSMUSG000000…	ENSMUSG00000000028(Cdc45),ENSMUSG00000000282(Mnt),ENSMUSG00000000440(Pparg),ENSMUSG00000000673(Haao),ENSMUSG00000000751(Rpa1),ENSMUSG00000000869(Il4),ENSMUSG00000001120(Pcbp3),ENSMUSG00000001228(Uhrf1),ENSMUSG00000001419(Mef2d),ENSMUSG00000001755(Coasy),ENSMUSG00000001761(Smo),ENSMUSG00000002409(Dyrk1b),ENSMUSG00000002486(Tchp),ENSMUSG00000002617(Zfp40),ENSMUSG00000002625(Akap8l),ENSMUSG000000027…
BP	GO:0010648	negative regulation of cell communication	256	196	452	1340	1.98581e-24	2.16151e-22	ENSMUSG00000000001(Gnai3),ENSMUSG00000000957(Mmp14),ENSMUSG00000001098(Kctd10),ENSMUSG00000001175(Calm1),ENSMUSG00000002413(Braf),ENSMUSG00000003208(Yju2),ENSMUSG00000004221(Ikbkg),ENSMUSG00000004266(Ptpn6),ENSMUSG00000004296(Il12b),ENSMUSG00000004364(Cul3),ENSMUSG00000004446(Bid),ENSMUSG00000004936(Map2k1),ENSMUSG00000004952(Rasa4),ENSMUSG00000005087(Cd44),ENSMUSG00000005312(Ubqln1),ENSMUSG00000…	ENSMUSG00000000282(Mnt),ENSMUSG00000000440(Pparg),ENSMUSG00000000869(Il4),ENSMUSG00000001036(Epn2),ENSMUSG00000003190(Bcl2l12),ENSMUSG00000003452(Bicd1),ENSMUSG00000003518(Dusp3),ENSMUSG00000004347(Pde1c),ENSMUSG00000005469(Prkaca),ENSMUSG00000006435(Neurl1a),ENSMUSG00000006800(Sulf2),ENSMUSG00000007613(Tgfbr1),ENSMUSG00000008305(Tle1),ENSMUSG00000010047(Hyal2),ENSMUSG00000010057(Nprl2),ENSMUSG00…
BP	GO:0051247	positive regulation of protein metabolic process	341	200	541	1674	2.75829e-24	2.98259e-22	ENSMUSG00000000184(Ccnd2),ENSMUSG00000000409(Lck),ENSMUSG00000000532(Acvr1b),ENSMUSG00000000555(Itga5),ENSMUSG00000000568(Hnrnpd),ENSMUSG00000000708(Kat2b),ENSMUSG00000000915(Hip1r),ENSMUSG00000000957(Mmp14),ENSMUSG00000000982(Ccl3),ENSMUSG00000001123(Lgals9),ENSMUSG00000001175(Calm1),ENSMUSG00000002307(Daxx),ENSMUSG00000002413(Braf),ENSMUSG00000002699(Lcp2),ENSMUSG00000003948(Mmd),ENSMUSG0000000…	ENSMUSG00000000440(Pparg),ENSMUSG00000000869(Il4),ENSMUSG00000001228(Uhrf1),ENSMUSG00000002083(Bbc3),ENSMUSG00000002625(Akap8l),ENSMUSG00000004099(Dnmt1),ENSMUSG00000005102(Eif2ak4),ENSMUSG00000005534(Insr),ENSMUSG00000005583(Mef2c),ENSMUSG00000005718(Tfap4),ENSMUSG00000006235(Epor),ENSMUSG00000006362(Cbfa2t3),ENSMUSG00000006435(Neurl1a),ENSMUSG00000006728(Cdk4),ENSMUSG00000007613(Tgfbr1),ENSMUSG…
BP	GO:0042981	regulation of apoptotic process	308	196	504	1535	2.79509e-24	3.00262e-22	ENSMUSG00000000001(Gnai3),ENSMUSG00000000184(Ccnd2),ENSMUSG00000000409(Lck),ENSMUSG00000000555(Itga5),ENSMUSG00000000600(Krit1),ENSMUSG00000000915(Hip1r),ENSMUSG00000000982(Ccl3),ENSMUSG00000001288(Rarg),ENSMUSG00000001435(Col18a1),ENSMUSG00000001707(Eef1e1),ENSMUSG00000002413(Braf),ENSMUSG00000002602(Axl),ENSMUSG00000003283(Hck),ENSMUSG00000003541(Ier3),ENSMUSG00000004043(Stat5a),ENSMUSG00000004…	ENSMUSG00000000282(Mnt),ENSMUSG00000000440(Pparg),ENSMUSG00000000631(Myo18a),ENSMUSG00000000869(Il4),ENSMUSG00000001761(Smo),ENSMUSG00000002083(Bbc3),ENSMUSG00000002289(Angptl4),ENSMUSG00000002731(Prkra),ENSMUSG00000003190(Bcl2l12),ENSMUSG00000003378(Grik5),ENSMUSG00000003882(Il7r),ENSMUSG00000004099(Dnmt1),ENSMUSG00000005514(Por),ENSMUSG00000005583(Mef2c),ENSMUSG00000005718(Tfap4),ENSMUSG0000000…
BP	GO:0023057	negative regulation of signaling	256	196	452	1343	3.33791e-24	3.56246e-22	ENSMUSG00000000001(Gnai3),ENSMUSG00000000957(Mmp14),ENSMUSG00000001098(Kctd10),ENSMUSG00000001175(Calm1),ENSMUSG00000002413(Braf),ENSMUSG00000003208(Yju2),ENSMUSG00000004221(Ikbkg),ENSMUSG00000004266(Ptpn6),ENSMUSG00000004296(Il12b),ENSMUSG00000004364(Cul3),ENSMUSG00000004446(Bid),ENSMUSG00000004936(Map2k1),ENSMUSG00000004952(Rasa4),ENSMUSG00000005087(Cd44),ENSMUSG00000005312(Ubqln1),ENSMUSG00000…	ENSMUSG00000000282(Mnt),ENSMUSG00000000440(Pparg),ENSMUSG00000000869(Il4),ENSMUSG00000001036(Epn2),ENSMUSG00000003190(Bcl2l12),ENSMUSG00000003452(Bicd1),ENSMUSG00000003518(Dusp3),ENSMUSG00000004347(Pde1c),ENSMUSG00000005469(Prkaca),ENSMUSG00000006435(Neurl1a),ENSMUSG00000006800(Sulf2),ENSMUSG00000007613(Tgfbr1),ENSMUSG00000008305(Tle1),ENSMUSG00000010047(Hyal2),ENSMUSG00000010057(Nprl2),ENSMUSG00…
BP	GO:0032270	positive regulation of cellular protein metabolic process	332	189	521	1600	3.41015e-24	3.61608e-22	ENSMUSG00000000184(Ccnd2),ENSMUSG00000000409(Lck),ENSMUSG00000000532(Acvr1b),ENSMUSG00000000555(Itga5),ENSMUSG00000000568(Hnrnpd),ENSMUSG00000000708(Kat2b),ENSMUSG00000000915(Hip1r),ENSMUSG00000000957(Mmp14),ENSMUSG00000000982(Ccl3),ENSMUSG00000001123(Lgals9),ENSMUSG00000001175(Calm1),ENSMUSG00000002307(Daxx),ENSMUSG00000002413(Braf),ENSMUSG00000002699(Lcp2),ENSMUSG00000003948(Mmd),ENSMUSG0000000…	ENSMUSG00000000440(Pparg),ENSMUSG00000000869(Il4),ENSMUSG00000001228(Uhrf1),ENSMUSG00000002083(Bbc3),ENSMUSG00000002625(Akap8l),ENSMUSG00000004099(Dnmt1),ENSMUSG00000005102(Eif2ak4),ENSMUSG00000005534(Insr),ENSMUSG00000005583(Mef2c),ENSMUSG00000005718(Tfap4),ENSMUSG00000006235(Epor),ENSMUSG00000006362(Cbfa2t3),ENSMUSG00000006435(Neurl1a),ENSMUSG00000006728(Cdk4),ENSMUSG00000007613(Tgfbr1),ENSMUSG…
BP	GO:0002520	immune system development	228	129	357	1000	4.08116e-24	4.29986e-22	ENSMUSG00000000248(Clec2g),ENSMUSG00000000409(Lck),ENSMUSG00000000532(Acvr1b),ENSMUSG00000000732(Icosl),ENSMUSG00000000957(Mmp14),ENSMUSG00000000982(Ccl3),ENSMUSG00000001123(Lgals9),ENSMUSG00000001288(Rarg),ENSMUSG00000001786(Fbxo7),ENSMUSG00000002111(Spi1),ENSMUSG00000002413(Braf),ENSMUSG00000002602(Axl),ENSMUSG00000002983(Relb),ENSMUSG00000003070(Efna2),ENSMUSG00000004040(Stat3),ENSMUSG00000004…	ENSMUSG00000000440(Pparg),ENSMUSG00000000751(Rpa1),ENSMUSG00000000869(Il4),ENSMUSG00000003812(Dnase2a),ENSMUSG00000003882(Il7r),ENSMUSG00000005370(Msh6),ENSMUSG00000005583(Mef2c),ENSMUSG00000005958(Ephb3),ENSMUSG00000006362(Cbfa2t3),ENSMUSG00000007476(Lrrc8a),ENSMUSG00000007613(Tgfbr1),ENSMUSG00000010047(Hyal2),ENSMUSG00000010054(Tusc2),ENSMUSG00000016087(Fli1),ENSMUSG00000016493(Cd46),ENSMUSG000…
BP	GO:0034654	nucleobase-containing compound biosynthetic process	554	562	1116	3963	4.1849e-24	4.38108e-22	ENSMUSG00000000078(Klf6),ENSMUSG00000000247(Lhx2),ENSMUSG00000000275(Trim25),ENSMUSG00000000532(Acvr1b),ENSMUSG00000000568(Hnrnpd),ENSMUSG00000000708(Kat2b),ENSMUSG00000000730(Dnmt3l),ENSMUSG00000000776(Polr3d),ENSMUSG00000000982(Ccl3),ENSMUSG00000001156(Mxd1),ENSMUSG00000001288(Rarg),ENSMUSG00000001416(Cct3),ENSMUSG00000001542(Ell2),ENSMUSG00000001627(Ifrd1),ENSMUSG00000001632(Brpf1),ENSMUSG0000…	ENSMUSG00000000028(Cdc45),ENSMUSG00000000282(Mnt),ENSMUSG00000000440(Pparg),ENSMUSG00000000673(Haao),ENSMUSG00000000751(Rpa1),ENSMUSG00000000869(Il4),ENSMUSG00000001120(Pcbp3),ENSMUSG00000001228(Uhrf1),ENSMUSG00000001419(Mef2d),ENSMUSG00000001755(Coasy),ENSMUSG00000001761(Smo),ENSMUSG00000002409(Dyrk1b),ENSMUSG00000002486(Tchp),ENSMUSG00000002617(Zfp40),ENSMUSG00000002625(Akap8l),ENSMUSG000000029…
BP	GO:0009056	catabolic process	380	339	719	2366	6.26248e-24	6.51457e-22	ENSMUSG00000000001(Gnai3),ENSMUSG00000000275(Trim25),ENSMUSG00000000568(Hnrnpd),ENSMUSG00000000628(Hk2),ENSMUSG00000000957(Mmp14),ENSMUSG00000001098(Kctd10),ENSMUSG00000001248(Gramd1a),ENSMUSG00000001441(Npepps),ENSMUSG00000001467(Cyp51),ENSMUSG00000001786(Fbxo7),ENSMUSG00000002227(Mov10),ENSMUSG00000002845(Tmem39a),ENSMUSG00000002847(Pla1a),ENSMUSG00000003123(Lipe),ENSMUSG00000003308(Keap1),ENSM…	ENSMUSG00000000149(Gna12),ENSMUSG00000000326(Comt),ENSMUSG00000000673(Haao),ENSMUSG00000000869(Il4),ENSMUSG00000001054(Rmnd5b),ENSMUSG00000001228(Uhrf1),ENSMUSG00000001366(Fbxo9),ENSMUSG00000003346(Abhd17a),ENSMUSG00000003526(Prodh),ENSMUSG00000003623(Crot),ENSMUSG00000003809(Gcdh),ENSMUSG00000003812(Dnase2a),ENSMUSG00000004032(Gstm5),ENSMUSG00000004565(Pnpla6),ENSMUSG00000004567(Mcoln1),ENSMUSG0…
BP	GO:0009615	response to virus	123	29	152	322	8.84953e-24	9.14785e-22	ENSMUSG00000000275(Trim25),ENSMUSG00000000776(Polr3d),ENSMUSG00000000791(Il12rb1),ENSMUSG00000001123(Lgals9),ENSMUSG00000001166(Oas1c),ENSMUSG00000001168(Oas1h),ENSMUSG00000002227(Mov10),ENSMUSG00000002658(Gtf2f1),ENSMUSG00000004296(Il12b),ENSMUSG00000006205(Htra1),ENSMUSG00000008496(Pou2f2),ENSMUSG00000012519(Mlkl),ENSMUSG00000015671(Psma2),ENSMUSG00000017652(Cd40),ENSMUSG00000017830(Dhx58),ENSM…	ENSMUSG00000000869(Il4),ENSMUSG00000005102(Eif2ak4),ENSMUSG00000010047(Hyal2),ENSMUSG00000010051(Hyal1),ENSMUSG00000018428(Akap1),ENSMUSG00000020823(Sec14l1),ENSMUSG00000021703(Serinc5),ENSMUSG00000022051(Bnip3l),ENSMUSG00000022476(Polr3h),ENSMUSG00000023150(Ivns1abp),ENSMUSG00000024978(Gpam),ENSMUSG00000026469(Xpr1),ENSMUSG00000027843(Ptpn22),ENSMUSG00000028832(Stmn1),ENSMUSG00000029165(Agbl5),E…
CC	GO:0005813	centrosome	86	154	240	604	1.06612e-23	1.09517e-21	ENSMUSG00000000001(Gnai3),ENSMUSG00000000409(Lck),ENSMUSG00000000628(Hk2),ENSMUSG00000000708(Kat2b),ENSMUSG00000001175(Calm1),ENSMUSG00000002812(Flii),ENSMUSG00000002983(Relb),ENSMUSG00000002997(Prkar2b),ENSMUSG00000003308(Keap1),ENSMUSG00000004364(Cul3),ENSMUSG00000004591(Pkn2),ENSMUSG00000004771(Rab11a),ENSMUSG00000005732(Ranbp1),ENSMUSG00000006740(Kif5b),ENSMUSG00000007739(Cct4),ENSMUSG0000001…	ENSMUSG00000000028(Cdc45),ENSMUSG00000002031(Ift46),ENSMUSG00000002055(Spag5),ENSMUSG00000002486(Tchp),ENSMUSG00000003282(Plag1),ENSMUSG00000003452(Bicd1),ENSMUSG00000004462(Tbccd1),ENSMUSG00000004768(Rab23),ENSMUSG00000005469(Prkaca),ENSMUSG00000005687(Bcas2),ENSMUSG00000005699(Pard6a),ENSMUSG00000006464(Bbs1),ENSMUSG00000012609(Ttll5),ENSMUSG00000014232(Cluap1),ENSMUSG00000015971(Actr8),ENSMUSG…
BP	GO:0002694	regulation of leukocyte activation	141	73	214	517	1.47562e-23	1.50641e-21	ENSMUSG00000000409(Lck),ENSMUSG00000000732(Icosl),ENSMUSG00000000791(Il12rb1),ENSMUSG00000000957(Mmp14),ENSMUSG00000001123(Lgals9),ENSMUSG00000001300(Efnb2),ENSMUSG00000001786(Fbxo7),ENSMUSG00000002413(Braf),ENSMUSG00000002602(Axl),ENSMUSG00000004043(Stat5a),ENSMUSG00000004266(Ptpn6),ENSMUSG00000004296(Il12b),ENSMUSG00000004709(Cd244a),ENSMUSG00000005413(Hmox1),ENSMUSG00000007655(Cav1),ENSMUSG000…	ENSMUSG00000000631(Myo18a),ENSMUSG00000000869(Il4),ENSMUSG00000002308(Cd320),ENSMUSG00000003518(Dusp3),ENSMUSG00000003882(Il7r),ENSMUSG00000005583(Mef2c),ENSMUSG00000005951(Shpk),ENSMUSG00000013707(Tnfaip8l2),ENSMUSG00000016493(Cd46),ENSMUSG00000017550(Atad5),ENSMUSG00000017697(Ada),ENSMUSG00000018752(Tnfsfm13),ENSMUSG00000020167(Tcf3),ENSMUSG00000020399(Havcr2),ENSMUSG00000020889(Nr1d1),ENSMUSG0…
BP	GO:0016477	cell migration	304	178	482	1464	1.70191e-23	1.7267e-21	ENSMUSG00000000532(Acvr1b),ENSMUSG00000000555(Itga5),ENSMUSG00000000600(Krit1),ENSMUSG00000000957(Mmp14),ENSMUSG00000000982(Ccl3),ENSMUSG00000001123(Lgals9),ENSMUSG00000001300(Efnb2),ENSMUSG00000001435(Col18a1),ENSMUSG00000001768(Rin2),ENSMUSG00000002233(Rhoc),ENSMUSG00000002413(Braf),ENSMUSG00000002602(Axl),ENSMUSG00000002897(Il17ra),ENSMUSG00000003665(Has1),ENSMUSG00000004040(Stat3),ENSMUSG0000…	ENSMUSG00000000149(Gna12),ENSMUSG00000000440(Pparg),ENSMUSG00000000631(Myo18a),ENSMUSG00000000869(Il4),ENSMUSG00000001227(Sema6b),ENSMUSG00000001741(Il16),ENSMUSG00000001761(Smo),ENSMUSG00000001827(Folr1),ENSMUSG00000003518(Dusp3),ENSMUSG00000004462(Tbccd1),ENSMUSG00000004530(Coro1c),ENSMUSG00000005534(Insr),ENSMUSG00000005583(Mef2c),ENSMUSG00000005958(Ephb3),ENSMUSG00000006464(Bbs1),ENSMUSG00000…
BP	GO:0001932	regulation of protein phosphorylation	303	176	479	1456	2.85312e-23	2.87457e-21	ENSMUSG00000000184(Ccnd2),ENSMUSG00000000409(Lck),ENSMUSG00000000532(Acvr1b),ENSMUSG00000000555(Itga5),ENSMUSG00000000708(Kat2b),ENSMUSG00000000982(Ccl3),ENSMUSG00000001123(Lgals9),ENSMUSG00000001785(Pwp1),ENSMUSG00000001786(Fbxo7),ENSMUSG00000002307(Daxx),ENSMUSG00000002413(Braf),ENSMUSG00000002699(Lcp2),ENSMUSG00000002997(Prkar2b),ENSMUSG00000003119(Cdk12),ENSMUSG00000003948(Mmd),ENSMUSG0000000…	ENSMUSG00000000869(Il4),ENSMUSG00000002625(Akap8l),ENSMUSG00000003518(Dusp3),ENSMUSG00000004530(Coro1c),ENSMUSG00000005102(Eif2ak4),ENSMUSG00000005534(Insr),ENSMUSG00000005583(Mef2c),ENSMUSG00000005699(Pard6a),ENSMUSG00000005718(Tfap4),ENSMUSG00000006235(Epor),ENSMUSG00000006435(Neurl1a),ENSMUSG00000007613(Tgfbr1),ENSMUSG00000010047(Hyal2),ENSMUSG00000013483(Card14),ENSMUSG00000014158(Trpv4),ENSM…
BP	GO:0019219	regulation of nucleobase-containing compound metabolic process	571	527	1098	3908	2.86827e-23	2.87457e-21	ENSMUSG00000000078(Klf6),ENSMUSG00000000247(Lhx2),ENSMUSG00000000275(Trim25),ENSMUSG00000000532(Acvr1b),ENSMUSG00000000568(Hnrnpd),ENSMUSG00000000708(Kat2b),ENSMUSG00000000730(Dnmt3l),ENSMUSG00000000982(Ccl3),ENSMUSG00000001156(Mxd1),ENSMUSG00000001166(Oas1c),ENSMUSG00000001168(Oas1h),ENSMUSG00000001288(Rarg),ENSMUSG00000001416(Cct3),ENSMUSG00000001542(Ell2),ENSMUSG00000001627(Ifrd1),ENSMUSG00000…	ENSMUSG00000000028(Cdc45),ENSMUSG00000000282(Mnt),ENSMUSG00000000440(Pparg),ENSMUSG00000000869(Il4),ENSMUSG00000001120(Pcbp3),ENSMUSG00000001228(Uhrf1),ENSMUSG00000001419(Mef2d),ENSMUSG00000001761(Smo),ENSMUSG00000002409(Dyrk1b),ENSMUSG00000002486(Tchp),ENSMUSG00000002617(Zfp40),ENSMUSG00000002625(Akap8l),ENSMUSG00000002968(Med25),ENSMUSG00000003190(Bcl2l12),ENSMUSG00000003282(Plag1),ENSMUSG00000…
BP	GO:0043549	regulation of kinase activity	188	120	308	837	3.01586e-23	3.00416e-21	ENSMUSG00000000184(Ccnd2),ENSMUSG00000000708(Kat2b),ENSMUSG00000001123(Lgals9),ENSMUSG00000001786(Fbxo7),ENSMUSG00000002307(Daxx),ENSMUSG00000002413(Braf),ENSMUSG00000002602(Axl),ENSMUSG00000002699(Lcp2),ENSMUSG00000002997(Prkar2b),ENSMUSG00000003119(Cdk12),ENSMUSG00000003226(Ranbp2),ENSMUSG00000003948(Mmd),ENSMUSG00000004085(Map3k20),ENSMUSG00000004221(Ikbkg),ENSMUSG00000004266(Ptpn6),ENSMUSG000…	ENSMUSG00000000869(Il4),ENSMUSG00000003518(Dusp3),ENSMUSG00000004530(Coro1c),ENSMUSG00000005534(Insr),ENSMUSG00000005583(Mef2c),ENSMUSG00000005718(Tfap4),ENSMUSG00000005958(Ephb3),ENSMUSG00000006435(Neurl1a),ENSMUSG00000007613(Tgfbr1),ENSMUSG00000009621(Vav2),ENSMUSG00000010047(Hyal2),ENSMUSG00000010057(Nprl2),ENSMUSG00000014426(Map3k4),ENSMUSG00000016349(Eef1a2),ENSMUSG00000016984(Etaa1),ENSMUSG…
BP	GO:0044248	cellular catabolic process	339	296	635	2055	5.57572e-23	5.52064e-21	ENSMUSG00000000001(Gnai3),ENSMUSG00000000275(Trim25),ENSMUSG00000000568(Hnrnpd),ENSMUSG00000000628(Hk2),ENSMUSG00000001098(Kctd10),ENSMUSG00000001248(Gramd1a),ENSMUSG00000001441(Npepps),ENSMUSG00000001786(Fbxo7),ENSMUSG00000002227(Mov10),ENSMUSG00000002845(Tmem39a),ENSMUSG00000003123(Lipe),ENSMUSG00000003308(Keap1),ENSMUSG00000003746(Man1a),ENSMUSG00000004040(Stat3),ENSMUSG00000004221(Ikbkg),ENSM…	ENSMUSG00000000149(Gna12),ENSMUSG00000000326(Comt),ENSMUSG00000000673(Haao),ENSMUSG00000000869(Il4),ENSMUSG00000001054(Rmnd5b),ENSMUSG00000001228(Uhrf1),ENSMUSG00000001366(Fbxo9),ENSMUSG00000003526(Prodh),ENSMUSG00000003623(Crot),ENSMUSG00000003809(Gcdh),ENSMUSG00000003812(Dnase2a),ENSMUSG00000004032(Gstm5),ENSMUSG00000004567(Mcoln1),ENSMUSG00000004768(Rab23),ENSMUSG00000004798(Ulk2),ENSMUSG00000…
CC	GO:0015630	microtubule cytoskeleton	166	265	431	1289	6.07994e-23	5.98383e-21	ENSMUSG00000000001(Gnai3),ENSMUSG00000000409(Lck),ENSMUSG00000000628(Hk2),ENSMUSG00000000708(Kat2b),ENSMUSG00000001175(Calm1),ENSMUSG00000001416(Cct3),ENSMUSG00000001473(Tubb6),ENSMUSG00000001833(Septin7),ENSMUSG00000002812(Flii),ENSMUSG00000002983(Relb),ENSMUSG00000002997(Prkar2b),ENSMUSG00000003308(Keap1),ENSMUSG00000004221(Ikbkg),ENSMUSG00000004364(Cul3),ENSMUSG00000004591(Pkn2),ENSMUSG0000000…	ENSMUSG00000000028(Cdc45),ENSMUSG00000002031(Ift46),ENSMUSG00000002055(Spag5),ENSMUSG00000002486(Tchp),ENSMUSG00000002870(Mcm2),ENSMUSG00000003282(Plag1),ENSMUSG00000003452(Bicd1),ENSMUSG00000003546(Klc4),ENSMUSG00000004187(Kifc2),ENSMUSG00000004462(Tbccd1),ENSMUSG00000004768(Rab23),ENSMUSG00000005469(Prkaca),ENSMUSG00000005687(Bcas2),ENSMUSG00000005699(Pard6a),ENSMUSG00000006464(Bbs1),ENSMUSG000…
BP	GO:0050865	regulation of cell activation	148	77	225	558	6.18338e-23	6.04941e-21	ENSMUSG00000000409(Lck),ENSMUSG00000000732(Icosl),ENSMUSG00000000791(Il12rb1),ENSMUSG00000000957(Mmp14),ENSMUSG00000001123(Lgals9),ENSMUSG00000001300(Efnb2),ENSMUSG00000001786(Fbxo7),ENSMUSG00000002413(Braf),ENSMUSG00000002602(Axl),ENSMUSG00000004043(Stat5a),ENSMUSG00000004266(Ptpn6),ENSMUSG00000004296(Il12b),ENSMUSG00000004709(Cd244a),ENSMUSG00000005413(Hmox1),ENSMUSG00000007655(Cav1),ENSMUSG000…	ENSMUSG00000000631(Myo18a),ENSMUSG00000000869(Il4),ENSMUSG00000002308(Cd320),ENSMUSG00000003518(Dusp3),ENSMUSG00000003882(Il7r),ENSMUSG00000005583(Mef2c),ENSMUSG00000005951(Shpk),ENSMUSG00000013707(Tnfaip8l2),ENSMUSG00000016493(Cd46),ENSMUSG00000017550(Atad5),ENSMUSG00000017697(Ada),ENSMUSG00000018752(Tnfsfm13),ENSMUSG00000020167(Tcf3),ENSMUSG00000020399(Havcr2),ENSMUSG00000020889(Nr1d1),ENSMUSG0…
BP	GO:0010629	negative regulation of gene expression	354	281	635	2057	7.2841e-23	7.08411e-21	ENSMUSG00000000247(Lhx2),ENSMUSG00000000532(Acvr1b),ENSMUSG00000000568(Hnrnpd),ENSMUSG00000000708(Kat2b),ENSMUSG00000000730(Dnmt3l),ENSMUSG00000000838(Fmr1),ENSMUSG00000000982(Ccl3),ENSMUSG00000001123(Lgals9),ENSMUSG00000001156(Mxd1),ENSMUSG00000001288(Rarg),ENSMUSG00000001348(Acp5),ENSMUSG00000002111(Spi1),ENSMUSG00000002227(Mov10),ENSMUSG00000002307(Daxx),ENSMUSG00000002578(Ikzf4),ENSMUSG000000…	ENSMUSG00000000028(Cdc45),ENSMUSG00000000282(Mnt),ENSMUSG00000000440(Pparg),ENSMUSG00000000869(Il4),ENSMUSG00000001120(Pcbp3),ENSMUSG00000001228(Uhrf1),ENSMUSG00000001761(Smo),ENSMUSG00000002731(Prkra),ENSMUSG00000002968(Med25),ENSMUSG00000003190(Bcl2l12),ENSMUSG00000003282(Plag1),ENSMUSG00000004099(Dnmt1),ENSMUSG00000005045(Chd5),ENSMUSG00000005102(Eif2ak4),ENSMUSG00000005534(Insr),ENSMUSG000000…
CC	GO:0005815	microtubule organizing center	102	191	293	793	7.74389e-23	7.45577e-21	ENSMUSG00000000001(Gnai3),ENSMUSG00000000409(Lck),ENSMUSG00000000628(Hk2),ENSMUSG00000000708(Kat2b),ENSMUSG00000001175(Calm1),ENSMUSG00000002812(Flii),ENSMUSG00000002983(Relb),ENSMUSG00000002997(Prkar2b),ENSMUSG00000003308(Keap1),ENSMUSG00000004364(Cul3),ENSMUSG00000004591(Pkn2),ENSMUSG00000004771(Rab11a),ENSMUSG00000004936(Map2k1),ENSMUSG00000005732(Ranbp1),ENSMUSG00000005779(Psmb4),ENSMUSG00000…	ENSMUSG00000000028(Cdc45),ENSMUSG00000002031(Ift46),ENSMUSG00000002055(Spag5),ENSMUSG00000002486(Tchp),ENSMUSG00000003282(Plag1),ENSMUSG00000003452(Bicd1),ENSMUSG00000004462(Tbccd1),ENSMUSG00000004768(Rab23),ENSMUSG00000005469(Prkaca),ENSMUSG00000005687(Bcas2),ENSMUSG00000005699(Pard6a),ENSMUSG00000006464(Bbs1),ENSMUSG00000012609(Ttll5),ENSMUSG00000014232(Cluap1),ENSMUSG00000015971(Actr8),ENSMUSG…
MF	GO:0019899	enzyme binding	399	305	704	2327	7.75698e-23	7.45577e-21	ENSMUSG00000000184(Ccnd2),ENSMUSG00000000409(Lck),ENSMUSG00000000568(Hnrnpd),ENSMUSG00000000708(Kat2b),ENSMUSG00000000730(Dnmt3l),ENSMUSG00000001098(Kctd10),ENSMUSG00000001123(Lgals9),ENSMUSG00000001175(Calm1),ENSMUSG00000001440(Kpnb1),ENSMUSG00000001763(Tspan33),ENSMUSG00000001786(Fbxo7),ENSMUSG00000002233(Rhoc),ENSMUSG00000002307(Daxx),ENSMUSG00000002413(Braf),ENSMUSG00000002658(Gtf2f1),ENSMUSG…	ENSMUSG00000000440(Pparg),ENSMUSG00000001419(Mef2d),ENSMUSG00000001930(Vwf),ENSMUSG00000002083(Bbc3),ENSMUSG00000002625(Akap8l),ENSMUSG00000002731(Prkra),ENSMUSG00000002870(Mcm2),ENSMUSG00000003134(Tbc1d8),ENSMUSG00000003153(Slc2a3),ENSMUSG00000003452(Bicd1),ENSMUSG00000003518(Dusp3),ENSMUSG00000004032(Gstm5),ENSMUSG00000004099(Dnmt1),ENSMUSG00000004530(Coro1c),ENSMUSG00000005045(Chd5),ENSMUSG000…
MF	GO:0097367	carbohydrate derivative binding	359	321	680	2233	7.90353e-23	7.55246e-21	ENSMUSG00000000001(Gnai3),ENSMUSG00000000409(Lck),ENSMUSG00000000532(Acvr1b),ENSMUSG00000000628(Hk2),ENSMUSG00000001123(Lgals9),ENSMUSG00000001416(Cct3),ENSMUSG00000001473(Tubb6),ENSMUSG00000001630(Stk38l),ENSMUSG00000001833(Septin7),ENSMUSG00000002227(Mov10),ENSMUSG00000002233(Rhoc),ENSMUSG00000002413(Braf),ENSMUSG00000002602(Axl),ENSMUSG00000002997(Prkar2b),ENSMUSG00000003119(Cdk12),ENSMUSG0000…	ENSMUSG00000000149(Gna12),ENSMUSG00000000631(Myo18a),ENSMUSG00000001436(Slc19a1),ENSMUSG00000001755(Coasy),ENSMUSG00000002409(Dyrk1b),ENSMUSG00000002870(Mcm2),ENSMUSG00000003153(Slc2a3),ENSMUSG00000003809(Gcdh),ENSMUSG00000004187(Kifc2),ENSMUSG00000004347(Pde1c),ENSMUSG00000004768(Rab23),ENSMUSG00000004798(Ulk2),ENSMUSG00000004933(Matk),ENSMUSG00000005043(Sgsh),ENSMUSG00000005045(Chd5),ENSMUSG000…
MF	GO:0036094	small molecule binding	375	396	771	2593	8.94042e-23	8.49392e-21	ENSMUSG00000000001(Gnai3),ENSMUSG00000000409(Lck),ENSMUSG00000000532(Acvr1b),ENSMUSG00000000628(Hk2),ENSMUSG00000001248(Gramd1a),ENSMUSG00000001416(Cct3),ENSMUSG00000001473(Tubb6),ENSMUSG00000001630(Stk38l),ENSMUSG00000001833(Septin7),ENSMUSG00000002227(Mov10),ENSMUSG00000002233(Rhoc),ENSMUSG00000002413(Braf),ENSMUSG00000002602(Axl),ENSMUSG00000002997(Prkar2b),ENSMUSG00000003119(Cdk12),ENSMUSG000…	ENSMUSG00000000149(Gna12),ENSMUSG00000000631(Myo18a),ENSMUSG00000000673(Haao),ENSMUSG00000001143(Lman2l),ENSMUSG00000001228(Uhrf1),ENSMUSG00000001436(Slc19a1),ENSMUSG00000001755(Coasy),ENSMUSG00000001827(Folr1),ENSMUSG00000002308(Cd320),ENSMUSG00000002409(Dyrk1b),ENSMUSG00000002870(Mcm2),ENSMUSG00000003153(Slc2a3),ENSMUSG00000003526(Prodh),ENSMUSG00000003809(Gcdh),ENSMUSG00000004099(Dnmt1),ENSMUS…
BP	GO:0033043	regulation of organelle organization	228	198	426	1274	3.28212e-22	3.10028e-20	ENSMUSG00000000568(Hnrnpd),ENSMUSG00000000628(Hk2),ENSMUSG00000000708(Kat2b),ENSMUSG00000000915(Hip1r),ENSMUSG00000001052(Sec24b),ENSMUSG00000001416(Cct3),ENSMUSG00000001786(Fbxo7),ENSMUSG00000002111(Spi1),ENSMUSG00000002233(Rhoc),ENSMUSG00000002413(Braf),ENSMUSG00000002812(Flii),ENSMUSG00000002845(Tmem39a),ENSMUSG00000003283(Hck),ENSMUSG00000004364(Cul3),ENSMUSG00000004446(Bid),ENSMUSG0000000445…	ENSMUSG00000000028(Cdc45),ENSMUSG00000002031(Ift46),ENSMUSG00000002055(Spag5),ENSMUSG00000002083(Bbc3),ENSMUSG00000002486(Tchp),ENSMUSG00000002625(Akap8l),ENSMUSG00000002870(Mcm2),ENSMUSG00000003378(Grik5),ENSMUSG00000003452(Bicd1),ENSMUSG00000004099(Dnmt1),ENSMUSG00000005534(Insr),ENSMUSG00000005583(Mef2c),ENSMUSG00000007613(Tgfbr1),ENSMUSG00000010057(Nprl2),ENSMUSG00000011832(Evi5l),ENSMUSG0000…
MF	GO:0016787	hydrolase activity	349	397	746	2506	3.84398e-22	3.61027e-20	ENSMUSG00000000001(Gnai3),ENSMUSG00000000385(Tmprss2),ENSMUSG00000000409(Lck),ENSMUSG00000000957(Mmp14),ENSMUSG00000001348(Acp5),ENSMUSG00000001441(Npepps),ENSMUSG00000001473(Tubb6),ENSMUSG00000001663(Gstt1),ENSMUSG00000002103(Acp2),ENSMUSG00000002227(Mov10),ENSMUSG00000002233(Rhoc),ENSMUSG00000002847(Pla1a),ENSMUSG00000003123(Lipe),ENSMUSG00000003746(Man1a),ENSMUSG00000004266(Ptpn6),ENSMUSG00000…	ENSMUSG00000000149(Gna12),ENSMUSG00000000631(Myo18a),ENSMUSG00000000686(Abhd15),ENSMUSG00000001751(Naglu),ENSMUSG00000001865(Cpa3),ENSMUSG00000001942(Siae),ENSMUSG00000002228(Ppm1j),ENSMUSG00000002329(Mdp1),ENSMUSG00000002346(Slc25a42),ENSMUSG00000002870(Mcm2),ENSMUSG00000003346(Abhd17a),ENSMUSG00000003518(Dusp3),ENSMUSG00000003812(Dnase2a),ENSMUSG00000004187(Kifc2),ENSMUSG00000004347(Pde1c),ENSM…
BP	GO:0031324	negative regulation of cellular metabolic process	419	374	793	2701	9.48157e-22	8.85449e-20	ENSMUSG00000000568(Hnrnpd),ENSMUSG00000000628(Hk2),ENSMUSG00000000708(Kat2b),ENSMUSG00000000730(Dnmt3l),ENSMUSG00000000838(Fmr1),ENSMUSG00000000983(Wfdc18),ENSMUSG00000001156(Mxd1),ENSMUSG00000001288(Rarg),ENSMUSG00000001348(Acp5),ENSMUSG00000001785(Pwp1),ENSMUSG00000001786(Fbxo7),ENSMUSG00000002111(Spi1),ENSMUSG00000002227(Mov10),ENSMUSG00000002307(Daxx),ENSMUSG00000002578(Ikzf4),ENSMUSG00000002…	ENSMUSG00000000028(Cdc45),ENSMUSG00000000282(Mnt),ENSMUSG00000000326(Comt),ENSMUSG00000000440(Pparg),ENSMUSG00000000869(Il4),ENSMUSG00000001120(Pcbp3),ENSMUSG00000001228(Uhrf1),ENSMUSG00000001761(Smo),ENSMUSG00000002968(Med25),ENSMUSG00000003190(Bcl2l12),ENSMUSG00000003518(Dusp3),ENSMUSG00000004099(Dnmt1),ENSMUSG00000004530(Coro1c),ENSMUSG00000005045(Chd5),ENSMUSG00000005102(Eif2ak4),ENSMUSG00000…
BP	GO:0048870	cell motility	317	200	517	1623	1.10146e-21	1.01706e-19	ENSMUSG00000000532(Acvr1b),ENSMUSG00000000555(Itga5),ENSMUSG00000000600(Krit1),ENSMUSG00000000957(Mmp14),ENSMUSG00000000982(Ccl3),ENSMUSG00000001123(Lgals9),ENSMUSG00000001300(Efnb2),ENSMUSG00000001435(Col18a1),ENSMUSG00000001768(Rin2),ENSMUSG00000002233(Rhoc),ENSMUSG00000002413(Braf),ENSMUSG00000002602(Axl),ENSMUSG00000002897(Il17ra),ENSMUSG00000003665(Has1),ENSMUSG00000004040(Stat3),ENSMUSG0000…	ENSMUSG00000000149(Gna12),ENSMUSG00000000440(Pparg),ENSMUSG00000000631(Myo18a),ENSMUSG00000000869(Il4),ENSMUSG00000001227(Sema6b),ENSMUSG00000001741(Il16),ENSMUSG00000001761(Smo),ENSMUSG00000001827(Folr1),ENSMUSG00000002031(Ift46),ENSMUSG00000003518(Dusp3),ENSMUSG00000004462(Tbccd1),ENSMUSG00000004530(Coro1c),ENSMUSG00000005534(Insr),ENSMUSG00000005583(Mef2c),ENSMUSG00000005958(Ephb3),ENSMUSG0000…
BP	GO:0051674	localization of cell	317	200	517	1623	1.10146e-21	1.01706e-19	ENSMUSG00000000532(Acvr1b),ENSMUSG00000000555(Itga5),ENSMUSG00000000600(Krit1),ENSMUSG00000000957(Mmp14),ENSMUSG00000000982(Ccl3),ENSMUSG00000001123(Lgals9),ENSMUSG00000001300(Efnb2),ENSMUSG00000001435(Col18a1),ENSMUSG00000001768(Rin2),ENSMUSG00000002233(Rhoc),ENSMUSG00000002413(Braf),ENSMUSG00000002602(Axl),ENSMUSG00000002897(Il17ra),ENSMUSG00000003665(Has1),ENSMUSG00000004040(Stat3),ENSMUSG0000…	ENSMUSG00000000149(Gna12),ENSMUSG00000000440(Pparg),ENSMUSG00000000631(Myo18a),ENSMUSG00000000869(Il4),ENSMUSG00000001227(Sema6b),ENSMUSG00000001741(Il16),ENSMUSG00000001761(Smo),ENSMUSG00000001827(Folr1),ENSMUSG00000002031(Ift46),ENSMUSG00000003518(Dusp3),ENSMUSG00000004462(Tbccd1),ENSMUSG00000004530(Coro1c),ENSMUSG00000005534(Insr),ENSMUSG00000005583(Mef2c),ENSMUSG00000005958(Ephb3),ENSMUSG0000…
BP	GO:0035456	response to interferon-beta	46	1	47	58	1.88783e-21	1.73343e-19	ENSMUSG00000018899(Irf1),ENSMUSG00000020464(Pnpt1),ENSMUSG00000022971(Ifnar2),ENSMUSG00000025491(Ifitm1),ENSMUSG00000025492(Ifitm3),ENSMUSG00000026535(Ifi202b),ENSMUSG00000026536(Ifi211),ENSMUSG00000028268(Gbp3),ENSMUSG00000028270(Gbp2),ENSMUSG00000031639(Tlr3),ENSMUSG00000032369(Plscr1),ENSMUSG00000034459(Ifit1),ENSMUSG00000037849(Ifi206),ENSMUSG00000037860(Aim2),ENSMUSG00000038884(Shfl),ENSMUSG…	ENSMUSG00000068329(Htra2)
BP	GO:0048534	hematopoietic or lymphoid organ development	215	116	331	939	2.20074e-21	2.00952e-19	ENSMUSG00000000248(Clec2g),ENSMUSG00000000409(Lck),ENSMUSG00000000532(Acvr1b),ENSMUSG00000000957(Mmp14),ENSMUSG00000000982(Ccl3),ENSMUSG00000001123(Lgals9),ENSMUSG00000001288(Rarg),ENSMUSG00000001786(Fbxo7),ENSMUSG00000002111(Spi1),ENSMUSG00000002413(Braf),ENSMUSG00000002602(Axl),ENSMUSG00000002983(Relb),ENSMUSG00000003070(Efna2),ENSMUSG00000004040(Stat3),ENSMUSG00000004043(Stat5a),ENSMUSG0000000…	ENSMUSG00000000440(Pparg),ENSMUSG00000000751(Rpa1),ENSMUSG00000000869(Il4),ENSMUSG00000003812(Dnase2a),ENSMUSG00000003882(Il7r),ENSMUSG00000005583(Mef2c),ENSMUSG00000005958(Ephb3),ENSMUSG00000006362(Cbfa2t3),ENSMUSG00000007476(Lrrc8a),ENSMUSG00000007613(Tgfbr1),ENSMUSG00000010047(Hyal2),ENSMUSG00000010054(Tusc2),ENSMUSG00000016087(Fli1),ENSMUSG00000016493(Cd46),ENSMUSG00000017697(Ada),ENSMUSG0000…
BP	GO:0010467	gene expression	855	667	1522	5748	3.61234e-21	3.28024e-19	ENSMUSG00000000078(Klf6),ENSMUSG00000000247(Lhx2),ENSMUSG00000000275(Trim25),ENSMUSG00000000385(Tmprss2),ENSMUSG00000000409(Lck),ENSMUSG00000000532(Acvr1b),ENSMUSG00000000568(Hnrnpd),ENSMUSG00000000708(Kat2b),ENSMUSG00000000730(Dnmt3l),ENSMUSG00000000732(Icosl),ENSMUSG00000000776(Polr3d),ENSMUSG00000000791(Il12rb1),ENSMUSG00000000838(Fmr1),ENSMUSG00000000957(Mmp14),ENSMUSG00000000982(Ccl3),ENSMUS…	ENSMUSG00000000028(Cdc45),ENSMUSG00000000282(Mnt),ENSMUSG00000000440(Pparg),ENSMUSG00000000869(Il4),ENSMUSG00000001120(Pcbp3),ENSMUSG00000001228(Uhrf1),ENSMUSG00000001419(Mef2d),ENSMUSG00000001741(Il16),ENSMUSG00000001761(Smo),ENSMUSG00000002409(Dyrk1b),ENSMUSG00000002486(Tchp),ENSMUSG00000002617(Zfp40),ENSMUSG00000002625(Akap8l),ENSMUSG00000002731(Prkra),ENSMUSG00000002767(Mrpl2),ENSMUSG00000002…
BP	GO:0051252	regulation of RNA metabolic process	540	488	1028	3669	3.71582e-21	3.35567e-19	ENSMUSG00000000078(Klf6),ENSMUSG00000000247(Lhx2),ENSMUSG00000000275(Trim25),ENSMUSG00000000532(Acvr1b),ENSMUSG00000000568(Hnrnpd),ENSMUSG00000000708(Kat2b),ENSMUSG00000000730(Dnmt3l),ENSMUSG00000000982(Ccl3),ENSMUSG00000001156(Mxd1),ENSMUSG00000001166(Oas1c),ENSMUSG00000001168(Oas1h),ENSMUSG00000001288(Rarg),ENSMUSG00000001542(Ell2),ENSMUSG00000001627(Ifrd1),ENSMUSG00000001632(Brpf1),ENSMUSG0000…	ENSMUSG00000000028(Cdc45),ENSMUSG00000000282(Mnt),ENSMUSG00000000440(Pparg),ENSMUSG00000000869(Il4),ENSMUSG00000001120(Pcbp3),ENSMUSG00000001228(Uhrf1),ENSMUSG00000001419(Mef2d),ENSMUSG00000001761(Smo),ENSMUSG00000002409(Dyrk1b),ENSMUSG00000002486(Tchp),ENSMUSG00000002617(Zfp40),ENSMUSG00000002625(Akap8l),ENSMUSG00000002968(Med25),ENSMUSG00000003190(Bcl2l12),ENSMUSG00000003282(Plag1),ENSMUSG00000…
BP	GO:1901700	response to oxygen-containing compound	351	207	558	1789	3.99141e-21	3.58486e-19	ENSMUSG00000000001(Gnai3),ENSMUSG00000000275(Trim25),ENSMUSG00000000409(Lck),ENSMUSG00000000568(Hnrnpd),ENSMUSG00000000708(Kat2b),ENSMUSG00000000982(Ccl3),ENSMUSG00000001123(Lgals9),ENSMUSG00000001175(Calm1),ENSMUSG00000001248(Gramd1a),ENSMUSG00000001288(Rarg),ENSMUSG00000001348(Acp5),ENSMUSG00000001663(Gstt1),ENSMUSG00000001786(Fbxo7),ENSMUSG00000002111(Spi1),ENSMUSG00000002413(Braf),ENSMUSG0000…	ENSMUSG00000000326(Comt),ENSMUSG00000000440(Pparg),ENSMUSG00000001761(Smo),ENSMUSG00000001827(Folr1),ENSMUSG00000003378(Grik5),ENSMUSG00000004099(Dnmt1),ENSMUSG00000004347(Pde1c),ENSMUSG00000005469(Prkaca),ENSMUSG00000005514(Por),ENSMUSG00000005534(Insr),ENSMUSG00000005583(Mef2c),ENSMUSG00000005718(Tfap4),ENSMUSG00000005951(Shpk),ENSMUSG00000006235(Epor),ENSMUSG00000006344(Ggt5),ENSMUSG0000000643…
BP	GO:1901701	cellular response to oxygen-containing compound	256	151	407	1219	4.20107e-21	3.75265e-19	ENSMUSG00000000001(Gnai3),ENSMUSG00000000568(Hnrnpd),ENSMUSG00000000708(Kat2b),ENSMUSG00000000982(Ccl3),ENSMUSG00000001248(Gramd1a),ENSMUSG00000001288(Rarg),ENSMUSG00000001786(Fbxo7),ENSMUSG00000002111(Spi1),ENSMUSG00000002602(Axl),ENSMUSG00000003308(Keap1),ENSMUSG00000004040(Stat3),ENSMUSG00000004043(Stat5a),ENSMUSG00000004296(Il12b),ENSMUSG00000005057(Sh2b2),ENSMUSG00000005732(Ranbp1),ENSMUSG00…	ENSMUSG00000000440(Pparg),ENSMUSG00000001761(Smo),ENSMUSG00000001827(Folr1),ENSMUSG00000003378(Grik5),ENSMUSG00000004099(Dnmt1),ENSMUSG00000004347(Pde1c),ENSMUSG00000005469(Prkaca),ENSMUSG00000005514(Por),ENSMUSG00000005534(Insr),ENSMUSG00000005583(Mef2c),ENSMUSG00000005718(Tfap4),ENSMUSG00000005951(Shpk),ENSMUSG00000006235(Epor),ENSMUSG00000006435(Neurl1a),ENSMUSG00000006728(Cdk4),ENSMUSG0000000…
BP	GO:0019221	cytokine-mediated signaling pathway	142	32	174	408	5.29955e-21	4.70829e-19	ENSMUSG00000000791(Il12rb1),ENSMUSG00000000982(Ccl3),ENSMUSG00000002111(Spi1),ENSMUSG00000002602(Axl),ENSMUSG00000002897(Il17ra),ENSMUSG00000003206(Ebi3),ENSMUSG00000004040(Stat3),ENSMUSG00000004043(Stat5a),ENSMUSG00000004266(Ptpn6),ENSMUSG00000004296(Il12b),ENSMUSG00000005057(Sh2b2),ENSMUSG00000005087(Cd44),ENSMUSG00000007655(Cav1),ENSMUSG00000009185(Ccl8),ENSMUSG00000014599(Csf1),ENSMUSG0000001…	ENSMUSG00000000440(Pparg),ENSMUSG00000003882(Il7r),ENSMUSG00000004071(Cdip1),ENSMUSG00000006235(Epor),ENSMUSG00000013483(Card14),ENSMUSG00000020263(Appl2),ENSMUSG00000021756(Il6st),ENSMUSG00000023826(Prkn),ENSMUSG00000025235(Bbs4),ENSMUSG00000026271(Gpr35),ENSMUSG00000027947(Il6ra),ENSMUSG00000028101(Pias3),ENSMUSG00000028927(Padi2),ENSMUSG00000031077(Fadd),ENSMUSG00000031451(Gas6),ENSMUSG0000003…
BP	GO:0002274	myeloid leukocyte activation	88	24	112	222	1.06363e-20	9.39881e-19	ENSMUSG00000000982(Ccl3),ENSMUSG00000001123(Lgals9),ENSMUSG00000002111(Spi1),ENSMUSG00000002699(Lcp2),ENSMUSG00000002983(Relb),ENSMUSG00000004709(Cd244a),ENSMUSG00000005413(Hmox1),ENSMUSG00000010358(Ifi35),ENSMUSG00000015316(Slamf1),ENSMUSG00000015355(Cd48),ENSMUSG00000016529(Il10),ENSMUSG00000017631(Abr),ENSMUSG00000018500(Adora2b),ENSMUSG00000018916(Csf2),ENSMUSG00000020572(Nampt),ENSMUSG000000…	ENSMUSG00000000631(Myo18a),ENSMUSG00000000869(Il4),ENSMUSG00000005951(Shpk),ENSMUSG00000010047(Hyal2),ENSMUSG00000020399(Havcr2),ENSMUSG00000020889(Nr1d1),ENSMUSG00000021356(Irf4),ENSMUSG00000029204(Rhoh),ENSMUSG00000032238(Rora),ENSMUSG00000032440(Tgfbr2),ENSMUSG00000033788(Dysf),ENSMUSG00000034652(Cd300a),ENSMUSG00000034957(Cebpa),ENSMUSG00000037432(Fer1l5),ENSMUSG00000038147(Cd84),ENSMUSG00000…
BP	GO:0045859	regulation of protein kinase activity	170	101	271	735	1.07416e-20	9.4411e-19	ENSMUSG00000000184(Ccnd2),ENSMUSG00000000708(Kat2b),ENSMUSG00000001123(Lgals9),ENSMUSG00000001786(Fbxo7),ENSMUSG00000002307(Daxx),ENSMUSG00000002413(Braf),ENSMUSG00000002699(Lcp2),ENSMUSG00000002997(Prkar2b),ENSMUSG00000003119(Cdk12),ENSMUSG00000003948(Mmd),ENSMUSG00000004085(Map3k20),ENSMUSG00000004221(Ikbkg),ENSMUSG00000004266(Ptpn6),ENSMUSG00000004296(Il12b),ENSMUSG00000004451(Ralb),ENSMUSG000…	ENSMUSG00000000869(Il4),ENSMUSG00000003518(Dusp3),ENSMUSG00000004530(Coro1c),ENSMUSG00000005534(Insr),ENSMUSG00000005583(Mef2c),ENSMUSG00000005718(Tfap4),ENSMUSG00000006435(Neurl1a),ENSMUSG00000007613(Tgfbr1),ENSMUSG00000010047(Hyal2),ENSMUSG00000014426(Map3k4),ENSMUSG00000016984(Etaa1),ENSMUSG00000018669(Cdk5rap3),ENSMUSG00000018909(Arrb1),ENSMUSG00000019876(Pkib),ENSMUSG00000019960(Dusp6),ENSMU…
BP	GO:0050867	positive regulation of cell activation	102	48	150	335	1.07993e-20	9.44131e-19	ENSMUSG00000000409(Lck),ENSMUSG00000000732(Icosl),ENSMUSG00000000791(Il12rb1),ENSMUSG00000000957(Mmp14),ENSMUSG00000001123(Lgals9),ENSMUSG00000001300(Efnb2),ENSMUSG00000002602(Axl),ENSMUSG00000004043(Stat5a),ENSMUSG00000004296(Il12b),ENSMUSG00000004709(Cd244a),ENSMUSG00000007655(Cav1),ENSMUSG00000015316(Slamf1),ENSMUSG00000015396(Cd83),ENSMUSG00000016206(H2-M3),ENSMUSG00000016496(Cd274),ENSMUSG00…	ENSMUSG00000000869(Il4),ENSMUSG00000002308(Cd320),ENSMUSG00000003882(Il7r),ENSMUSG00000005583(Mef2c),ENSMUSG00000016493(Cd46),ENSMUSG00000017550(Atad5),ENSMUSG00000017697(Ada),ENSMUSG00000018752(Tnfsfm13),ENSMUSG00000020167(Tcf3),ENSMUSG00000020399(Havcr2),ENSMUSG00000021756(Il6st),ENSMUSG00000022672(Prkdc),ENSMUSG00000024151(Msh2),ENSMUSG00000024978(Gpam),ENSMUSG00000026012(Cd28),ENSMUSG00000026…
BP	GO:2001141	regulation of RNA biosynthetic process	490	473	963	3413	1.10218e-20	9.58485e-19	ENSMUSG00000000078(Klf6),ENSMUSG00000000247(Lhx2),ENSMUSG00000000275(Trim25),ENSMUSG00000000532(Acvr1b),ENSMUSG00000000568(Hnrnpd),ENSMUSG00000000708(Kat2b),ENSMUSG00000000730(Dnmt3l),ENSMUSG00000000982(Ccl3),ENSMUSG00000001156(Mxd1),ENSMUSG00000001288(Rarg),ENSMUSG00000001542(Ell2),ENSMUSG00000001627(Ifrd1),ENSMUSG00000001632(Brpf1),ENSMUSG00000001785(Pwp1),ENSMUSG00000002111(Spi1),ENSMUSG000000…	ENSMUSG00000000028(Cdc45),ENSMUSG00000000282(Mnt),ENSMUSG00000000440(Pparg),ENSMUSG00000000869(Il4),ENSMUSG00000001120(Pcbp3),ENSMUSG00000001228(Uhrf1),ENSMUSG00000001419(Mef2d),ENSMUSG00000001761(Smo),ENSMUSG00000002409(Dyrk1b),ENSMUSG00000002486(Tchp),ENSMUSG00000002617(Zfp40),ENSMUSG00000002625(Akap8l),ENSMUSG00000002968(Med25),ENSMUSG00000003190(Bcl2l12),ENSMUSG00000003282(Plag1),ENSMUSG00000…
BP	GO:0006928	movement of cell or subcellular component	362	258	620	2038	1.21528e-20	1.05128e-18	ENSMUSG00000000247(Lhx2),ENSMUSG00000000532(Acvr1b),ENSMUSG00000000555(Itga5),ENSMUSG00000000600(Krit1),ENSMUSG00000000957(Mmp14),ENSMUSG00000000982(Ccl3),ENSMUSG00000001123(Lgals9),ENSMUSG00000001300(Efnb2),ENSMUSG00000001435(Col18a1),ENSMUSG00000001440(Kpnb1),ENSMUSG00000001768(Rin2),ENSMUSG00000002233(Rhoc),ENSMUSG00000002413(Braf),ENSMUSG00000002602(Axl),ENSMUSG00000002897(Il17ra),ENSMUSG0000…	ENSMUSG00000000149(Gna12),ENSMUSG00000000440(Pparg),ENSMUSG00000000631(Myo18a),ENSMUSG00000000869(Il4),ENSMUSG00000001227(Sema6b),ENSMUSG00000001741(Il16),ENSMUSG00000001761(Smo),ENSMUSG00000001827(Folr1),ENSMUSG00000002031(Ift46),ENSMUSG00000003452(Bicd1),ENSMUSG00000003518(Dusp3),ENSMUSG00000004151(Etv1),ENSMUSG00000004187(Kifc2),ENSMUSG00000004462(Tbccd1),ENSMUSG00000004530(Coro1c),ENSMUSG0000…
BP	GO:0002237	response to molecule of bacterial origin	130	33	163	376	1.28856e-20	1.10884e-18	ENSMUSG00000000982(Ccl3),ENSMUSG00000001123(Lgals9),ENSMUSG00000001348(Acp5),ENSMUSG00000002602(Axl),ENSMUSG00000004296(Il12b),ENSMUSG00000006818(Sod2),ENSMUSG00000015305(Sash1),ENSMUSG00000015755(Tab2),ENSMUSG00000016206(H2-M3),ENSMUSG00000016496(Cd274),ENSMUSG00000016528(Mapkapk2),ENSMUSG00000016529(Il10),ENSMUSG00000017002(Slpi),ENSMUSG00000017631(Abr),ENSMUSG00000017652(Cd40),ENSMUSG000000189…	ENSMUSG00000000326(Comt),ENSMUSG00000005583(Mef2c),ENSMUSG00000005951(Shpk),ENSMUSG00000006344(Ggt5),ENSMUSG00000006728(Cdk4),ENSMUSG00000008855(Hdac5),ENSMUSG00000020167(Tcf3),ENSMUSG00000020399(Havcr2),ENSMUSG00000020889(Nr1d1),ENSMUSG00000021250(Fos),ENSMUSG00000021699(Pde4d),ENSMUSG00000024975(Pdcd4),ENSMUSG00000025586(Cpeb1),ENSMUSG00000026842(Abl1),ENSMUSG00000027843(Ptpn22),ENSMUSG00000028…
BP	GO:0009891	positive regulation of biosynthetic process	338	271	609	1996	1.36976e-20	1.17258e-18	ENSMUSG00000000078(Klf6),ENSMUSG00000000247(Lhx2),ENSMUSG00000000275(Trim25),ENSMUSG00000000532(Acvr1b),ENSMUSG00000000568(Hnrnpd),ENSMUSG00000000708(Kat2b),ENSMUSG00000000982(Ccl3),ENSMUSG00000001288(Rarg),ENSMUSG00000001416(Cct3),ENSMUSG00000001542(Ell2),ENSMUSG00000001627(Ifrd1),ENSMUSG00000001632(Brpf1),ENSMUSG00000001785(Pwp1),ENSMUSG00000002111(Spi1),ENSMUSG00000002307(Daxx),ENSMUSG00000002…	ENSMUSG00000000440(Pparg),ENSMUSG00000000869(Il4),ENSMUSG00000001419(Mef2d),ENSMUSG00000001761(Smo),ENSMUSG00000002409(Dyrk1b),ENSMUSG00000002617(Zfp40),ENSMUSG00000002625(Akap8l),ENSMUSG00000002968(Med25),ENSMUSG00000003190(Bcl2l12),ENSMUSG00000003282(Plag1),ENSMUSG00000003575(Crtc1),ENSMUSG00000003992(Ssbp2),ENSMUSG00000004151(Etv1),ENSMUSG00000005102(Eif2ak4),ENSMUSG00000005514(Por),ENSMUSG000…
BP	GO:0032774	RNA biosynthetic process	504	490	994	3543	1.4367e-20	1.22351e-18	ENSMUSG00000000078(Klf6),ENSMUSG00000000247(Lhx2),ENSMUSG00000000275(Trim25),ENSMUSG00000000532(Acvr1b),ENSMUSG00000000568(Hnrnpd),ENSMUSG00000000708(Kat2b),ENSMUSG00000000730(Dnmt3l),ENSMUSG00000000776(Polr3d),ENSMUSG00000000982(Ccl3),ENSMUSG00000001156(Mxd1),ENSMUSG00000001288(Rarg),ENSMUSG00000001542(Ell2),ENSMUSG00000001627(Ifrd1),ENSMUSG00000001632(Brpf1),ENSMUSG00000001785(Pwp1),ENSMUSG0000…	ENSMUSG00000000028(Cdc45),ENSMUSG00000000282(Mnt),ENSMUSG00000000440(Pparg),ENSMUSG00000000869(Il4),ENSMUSG00000001120(Pcbp3),ENSMUSG00000001228(Uhrf1),ENSMUSG00000001419(Mef2d),ENSMUSG00000001761(Smo),ENSMUSG00000002409(Dyrk1b),ENSMUSG00000002486(Tchp),ENSMUSG00000002617(Zfp40),ENSMUSG00000002625(Akap8l),ENSMUSG00000002968(Med25),ENSMUSG00000003190(Bcl2l12),ENSMUSG00000003282(Plag1),ENSMUSG00000…
BP	GO:0009617	response to bacterium	217	55	272	740	1.49686e-20	1.26817e-18	ENSMUSG00000000204(Slfn4),ENSMUSG00000000682(Cd52),ENSMUSG00000000982(Ccl3),ENSMUSG00000000983(Wfdc18),ENSMUSG00000001123(Lgals9),ENSMUSG00000001348(Acp5),ENSMUSG00000002602(Axl),ENSMUSG00000003283(Hck),ENSMUSG00000004296(Il12b),ENSMUSG00000006403(Adamts4),ENSMUSG00000006818(Sod2),ENSMUSG00000007655(Cav1),ENSMUSG00000015305(Sash1),ENSMUSG00000015755(Tab2),ENSMUSG00000015947(Fcgr1),ENSMUSG00000015…	ENSMUSG00000000326(Comt),ENSMUSG00000003882(Il7r),ENSMUSG00000005583(Mef2c),ENSMUSG00000005951(Shpk),ENSMUSG00000006344(Ggt5),ENSMUSG00000006728(Cdk4),ENSMUSG00000008855(Hdac5),ENSMUSG00000010054(Tusc2),ENSMUSG00000020167(Tcf3),ENSMUSG00000020399(Havcr2),ENSMUSG00000020889(Nr1d1),ENSMUSG00000021250(Fos),ENSMUSG00000021640(Naip1),ENSMUSG00000021699(Pde4d),ENSMUSG00000023990(Tfeb),ENSMUSG0000002497…
BP	GO:0006355	regulation of transcription, DNA-templated	488	473	961	3408	1.51052e-20	1.27317e-18	ENSMUSG00000000078(Klf6),ENSMUSG00000000247(Lhx2),ENSMUSG00000000275(Trim25),ENSMUSG00000000532(Acvr1b),ENSMUSG00000000568(Hnrnpd),ENSMUSG00000000708(Kat2b),ENSMUSG00000000730(Dnmt3l),ENSMUSG00000000982(Ccl3),ENSMUSG00000001156(Mxd1),ENSMUSG00000001288(Rarg),ENSMUSG00000001542(Ell2),ENSMUSG00000001627(Ifrd1),ENSMUSG00000001632(Brpf1),ENSMUSG00000001785(Pwp1),ENSMUSG00000002111(Spi1),ENSMUSG000000…	ENSMUSG00000000028(Cdc45),ENSMUSG00000000282(Mnt),ENSMUSG00000000440(Pparg),ENSMUSG00000000869(Il4),ENSMUSG00000001120(Pcbp3),ENSMUSG00000001228(Uhrf1),ENSMUSG00000001419(Mef2d),ENSMUSG00000001761(Smo),ENSMUSG00000002409(Dyrk1b),ENSMUSG00000002486(Tchp),ENSMUSG00000002617(Zfp40),ENSMUSG00000002625(Akap8l),ENSMUSG00000002968(Med25),ENSMUSG00000003190(Bcl2l12),ENSMUSG00000003282(Plag1),ENSMUSG00000…
BP	GO:1903506	regulation of nucleic acid-templated transcription	488	473	961	3409	1.6666e-20	1.39756e-18	ENSMUSG00000000078(Klf6),ENSMUSG00000000247(Lhx2),ENSMUSG00000000275(Trim25),ENSMUSG00000000532(Acvr1b),ENSMUSG00000000568(Hnrnpd),ENSMUSG00000000708(Kat2b),ENSMUSG00000000730(Dnmt3l),ENSMUSG00000000982(Ccl3),ENSMUSG00000001156(Mxd1),ENSMUSG00000001288(Rarg),ENSMUSG00000001542(Ell2),ENSMUSG00000001627(Ifrd1),ENSMUSG00000001632(Brpf1),ENSMUSG00000001785(Pwp1),ENSMUSG00000002111(Spi1),ENSMUSG000000…	ENSMUSG00000000028(Cdc45),ENSMUSG00000000282(Mnt),ENSMUSG00000000440(Pparg),ENSMUSG00000000869(Il4),ENSMUSG00000001120(Pcbp3),ENSMUSG00000001228(Uhrf1),ENSMUSG00000001419(Mef2d),ENSMUSG00000001761(Smo),ENSMUSG00000002409(Dyrk1b),ENSMUSG00000002486(Tchp),ENSMUSG00000002617(Zfp40),ENSMUSG00000002625(Akap8l),ENSMUSG00000002968(Med25),ENSMUSG00000003190(Bcl2l12),ENSMUSG00000003282(Plag1),ENSMUSG00000…
CC	GO:0005856	cytoskeleton	301	373	674	2265	1.79845e-20	1.50047e-18	ENSMUSG00000000001(Gnai3),ENSMUSG00000000409(Lck),ENSMUSG00000000600(Krit1),ENSMUSG00000000628(Hk2),ENSMUSG00000000708(Kat2b),ENSMUSG00000000915(Hip1r),ENSMUSG00000000957(Mmp14),ENSMUSG00000001175(Calm1),ENSMUSG00000001416(Cct3),ENSMUSG00000001473(Tubb6),ENSMUSG00000001630(Stk38l),ENSMUSG00000001833(Septin7),ENSMUSG00000002233(Rhoc),ENSMUSG00000002602(Axl),ENSMUSG00000002812(Flii),ENSMUSG00000002…	ENSMUSG00000000028(Cdc45),ENSMUSG00000000056(Narf),ENSMUSG00000000631(Myo18a),ENSMUSG00000002031(Ift46),ENSMUSG00000002055(Spag5),ENSMUSG00000002257(Def6),ENSMUSG00000002486(Tchp),ENSMUSG00000002870(Mcm2),ENSMUSG00000003282(Plag1),ENSMUSG00000003452(Bicd1),ENSMUSG00000003546(Klc4),ENSMUSG00000004187(Kifc2),ENSMUSG00000004462(Tbccd1),ENSMUSG00000004530(Coro1c),ENSMUSG00000004768(Rab23),ENSMUSG0000…
BP	GO:0050778	positive regulation of immune response	150	48	198	490	1.91953e-20	1.5934e-18	ENSMUSG00000000409(Lck),ENSMUSG00000000732(Icosl),ENSMUSG00000000776(Polr3d),ENSMUSG00000000791(Il12rb1),ENSMUSG00000001123(Lgals9),ENSMUSG00000002413(Braf),ENSMUSG00000002699(Lcp2),ENSMUSG00000003352(Cacnb3),ENSMUSG00000004043(Stat5a),ENSMUSG00000004266(Ptpn6),ENSMUSG00000004296(Il12b),ENSMUSG00000005057(Sh2b2),ENSMUSG00000005763(Cd247),ENSMUSG00000006134(Crkl),ENSMUSG00000010358(Ifi35),ENSMUSG0…	ENSMUSG00000000869(Il4),ENSMUSG00000003518(Dusp3),ENSMUSG00000005102(Eif2ak4),ENSMUSG00000005583(Mef2c),ENSMUSG00000016493(Cd46),ENSMUSG00000016933(Plcg1),ENSMUSG00000017550(Atad5),ENSMUSG00000017697(Ada),ENSMUSG00000018752(Tnfsfm13),ENSMUSG00000020263(Appl2),ENSMUSG00000020399(Havcr2),ENSMUSG00000021108(Prkch),ENSMUSG00000021699(Pde4d),ENSMUSG00000022471(Xrcc6),ENSMUSG00000022672(Prkdc),ENSMUSG0…
BP	GO:0000278	mitotic cell cycle	134	160	294	819	2.18869e-20	1.8077e-18	ENSMUSG00000000184(Ccnd2),ENSMUSG00000000532(Acvr1b),ENSMUSG00000001175(Calm1),ENSMUSG00000001440(Kpnb1),ENSMUSG00000001473(Tubb6),ENSMUSG00000001786(Fbxo7),ENSMUSG00000002233(Rhoc),ENSMUSG00000004043(Stat5a),ENSMUSG00000004085(Map3k20),ENSMUSG00000004266(Ptpn6),ENSMUSG00000004364(Cul3),ENSMUSG00000004446(Bid),ENSMUSG00000004591(Pkn2),ENSMUSG00000004771(Rab11a),ENSMUSG00000004936(Map2k1),ENSMUSG0…	ENSMUSG00000000028(Cdc45),ENSMUSG00000002055(Spag5),ENSMUSG00000002625(Akap8l),ENSMUSG00000002870(Mcm2),ENSMUSG00000002871(Tpra1),ENSMUSG00000003518(Dusp3),ENSMUSG00000005534(Insr),ENSMUSG00000005718(Tfap4),ENSMUSG00000006678(Pola1),ENSMUSG00000006728(Cdk4),ENSMUSG00000007080(Pole),ENSMUSG00000007646(Rad51c),ENSMUSG00000010051(Hyal1),ENSMUSG00000012483(Rpa3),ENSMUSG00000015766(Eps8),ENSMUSG000000…
BP	GO:0030097	hemopoiesis	204	111	315	895	2.86012e-20	2.35045e-18	ENSMUSG00000000248(Clec2g),ENSMUSG00000000409(Lck),ENSMUSG00000000532(Acvr1b),ENSMUSG00000000957(Mmp14),ENSMUSG00000000982(Ccl3),ENSMUSG00000001123(Lgals9),ENSMUSG00000001288(Rarg),ENSMUSG00000001786(Fbxo7),ENSMUSG00000002111(Spi1),ENSMUSG00000002413(Braf),ENSMUSG00000002602(Axl),ENSMUSG00000002983(Relb),ENSMUSG00000003070(Efna2),ENSMUSG00000004040(Stat3),ENSMUSG00000004043(Stat5a),ENSMUSG0000000…	ENSMUSG00000000440(Pparg),ENSMUSG00000000751(Rpa1),ENSMUSG00000000869(Il4),ENSMUSG00000003812(Dnase2a),ENSMUSG00000003882(Il7r),ENSMUSG00000005583(Mef2c),ENSMUSG00000006362(Cbfa2t3),ENSMUSG00000007476(Lrrc8a),ENSMUSG00000010047(Hyal2),ENSMUSG00000010054(Tusc2),ENSMUSG00000016087(Fli1),ENSMUSG00000016493(Cd46),ENSMUSG00000017697(Ada),ENSMUSG00000018669(Cdk5rap3),ENSMUSG00000020167(Tcf3),ENSMUSG000…
BP	GO:0009967	positive regulation of signal transduction	320	172	492	1551	3.13729e-20	2.5654e-18	ENSMUSG00000000275(Trim25),ENSMUSG00000000409(Lck),ENSMUSG00000000532(Acvr1b),ENSMUSG00000000915(Hip1r),ENSMUSG00000000982(Ccl3),ENSMUSG00000001123(Lgals9),ENSMUSG00000001175(Calm1),ENSMUSG00000001707(Eef1e1),ENSMUSG00000002413(Braf),ENSMUSG00000002602(Axl),ENSMUSG00000003352(Cacnb3),ENSMUSG00000004040(Stat3),ENSMUSG00000004085(Map3k20),ENSMUSG00000004221(Ikbkg),ENSMUSG00000004266(Ptpn6),ENSMUSG0…	ENSMUSG00000000869(Il4),ENSMUSG00000001036(Epn2),ENSMUSG00000001761(Smo),ENSMUSG00000002083(Bbc3),ENSMUSG00000002731(Prkra),ENSMUSG00000003882(Il7r),ENSMUSG00000005045(Chd5),ENSMUSG00000005514(Por),ENSMUSG00000005534(Insr),ENSMUSG00000005583(Mef2c),ENSMUSG00000005718(Tfap4),ENSMUSG00000006235(Epor),ENSMUSG00000006435(Neurl1a),ENSMUSG00000006575(Rundc3a),ENSMUSG00000006800(Sulf2),ENSMUSG0000000761…
BP	GO:0002696	positive regulation of leukocyte activation	97	47	144	320	3.65454e-20	2.97357e-18	ENSMUSG00000000409(Lck),ENSMUSG00000000732(Icosl),ENSMUSG00000000791(Il12rb1),ENSMUSG00000000957(Mmp14),ENSMUSG00000001123(Lgals9),ENSMUSG00000001300(Efnb2),ENSMUSG00000002602(Axl),ENSMUSG00000004043(Stat5a),ENSMUSG00000004296(Il12b),ENSMUSG00000004709(Cd244a),ENSMUSG00000007655(Cav1),ENSMUSG00000015316(Slamf1),ENSMUSG00000015396(Cd83),ENSMUSG00000016206(H2-M3),ENSMUSG00000016496(Cd274),ENSMUSG00…	ENSMUSG00000000869(Il4),ENSMUSG00000002308(Cd320),ENSMUSG00000003882(Il7r),ENSMUSG00000005583(Mef2c),ENSMUSG00000016493(Cd46),ENSMUSG00000017550(Atad5),ENSMUSG00000017697(Ada),ENSMUSG00000018752(Tnfsfm13),ENSMUSG00000020167(Tcf3),ENSMUSG00000020399(Havcr2),ENSMUSG00000021756(Il6st),ENSMUSG00000022672(Prkdc),ENSMUSG00000024151(Msh2),ENSMUSG00000024978(Gpam),ENSMUSG00000026012(Cd28),ENSMUSG00000026…
BP	GO:0031328	positive regulation of cellular biosynthetic process	331	266	597	1957	3.69427e-20	2.99109e-18	ENSMUSG00000000078(Klf6),ENSMUSG00000000247(Lhx2),ENSMUSG00000000275(Trim25),ENSMUSG00000000532(Acvr1b),ENSMUSG00000000568(Hnrnpd),ENSMUSG00000000708(Kat2b),ENSMUSG00000000982(Ccl3),ENSMUSG00000001288(Rarg),ENSMUSG00000001416(Cct3),ENSMUSG00000001542(Ell2),ENSMUSG00000001627(Ifrd1),ENSMUSG00000001632(Brpf1),ENSMUSG00000001785(Pwp1),ENSMUSG00000002111(Spi1),ENSMUSG00000002307(Daxx),ENSMUSG00000002…	ENSMUSG00000000440(Pparg),ENSMUSG00000000869(Il4),ENSMUSG00000001419(Mef2d),ENSMUSG00000001761(Smo),ENSMUSG00000002409(Dyrk1b),ENSMUSG00000002617(Zfp40),ENSMUSG00000002625(Akap8l),ENSMUSG00000002968(Med25),ENSMUSG00000003190(Bcl2l12),ENSMUSG00000003282(Plag1),ENSMUSG00000003575(Crtc1),ENSMUSG00000003992(Ssbp2),ENSMUSG00000004151(Etv1),ENSMUSG00000005102(Eif2ak4),ENSMUSG00000005514(Por),ENSMUSG000…
BP	GO:0002221	pattern recognition receptor signaling pathway	70	17	87	156	4.80993e-20	3.87529e-18	ENSMUSG00000001123(Lgals9),ENSMUSG00000005312(Ubqln1),ENSMUSG00000007655(Cav1),ENSMUSG00000010358(Ifi35),ENSMUSG00000016528(Mapkapk2),ENSMUSG00000017652(Cd40),ENSMUSG00000017830(Dhx58),ENSMUSG00000018899(Irf1),ENSMUSG00000019850(Tnfaip3),ENSMUSG00000020124(Usp15),ENSMUSG00000020134(Peli1),ENSMUSG00000020227(Irak3),ENSMUSG00000020400(Tnip1),ENSMUSG00000020641(Rsad2),ENSMUSG00000020707(Rnf135),ENSM…	ENSMUSG00000013236(Ptprs),ENSMUSG00000020263(Appl2),ENSMUSG00000020399(Havcr2),ENSMUSG00000020823(Sec14l1),ENSMUSG00000020889(Nr1d1),ENSMUSG00000021356(Irf4),ENSMUSG00000027843(Ptpn22),ENSMUSG00000032109(Nlrx1),ENSMUSG00000033777(Tlr13),ENSMUSG00000034652(Cd300a),ENSMUSG00000035900(Gramd4),ENSMUSG00000036103(Colec12),ENSMUSG00000037523(Mavs),ENSMUSG00000047798(Cd300lf),ENSMUSG00000050132(Sarm1),E…
BP	GO:0006351	transcription, DNA-templated	502	485	987	3527	4.92057e-20	3.94509e-18	ENSMUSG00000000078(Klf6),ENSMUSG00000000247(Lhx2),ENSMUSG00000000275(Trim25),ENSMUSG00000000532(Acvr1b),ENSMUSG00000000568(Hnrnpd),ENSMUSG00000000708(Kat2b),ENSMUSG00000000730(Dnmt3l),ENSMUSG00000000776(Polr3d),ENSMUSG00000000982(Ccl3),ENSMUSG00000001156(Mxd1),ENSMUSG00000001288(Rarg),ENSMUSG00000001542(Ell2),ENSMUSG00000001627(Ifrd1),ENSMUSG00000001632(Brpf1),ENSMUSG00000001785(Pwp1),ENSMUSG0000…	ENSMUSG00000000028(Cdc45),ENSMUSG00000000282(Mnt),ENSMUSG00000000440(Pparg),ENSMUSG00000000869(Il4),ENSMUSG00000001120(Pcbp3),ENSMUSG00000001228(Uhrf1),ENSMUSG00000001419(Mef2d),ENSMUSG00000001761(Smo),ENSMUSG00000002409(Dyrk1b),ENSMUSG00000002486(Tchp),ENSMUSG00000002617(Zfp40),ENSMUSG00000002625(Akap8l),ENSMUSG00000002968(Med25),ENSMUSG00000003190(Bcl2l12),ENSMUSG00000003282(Plag1),ENSMUSG00000…
BP	GO:0097659	nucleic acid-templated transcription	502	485	987	3528	5.41335e-20	4.31911e-18	ENSMUSG00000000078(Klf6),ENSMUSG00000000247(Lhx2),ENSMUSG00000000275(Trim25),ENSMUSG00000000532(Acvr1b),ENSMUSG00000000568(Hnrnpd),ENSMUSG00000000708(Kat2b),ENSMUSG00000000730(Dnmt3l),ENSMUSG00000000776(Polr3d),ENSMUSG00000000982(Ccl3),ENSMUSG00000001156(Mxd1),ENSMUSG00000001288(Rarg),ENSMUSG00000001542(Ell2),ENSMUSG00000001627(Ifrd1),ENSMUSG00000001632(Brpf1),ENSMUSG00000001785(Pwp1),ENSMUSG0000…	ENSMUSG00000000028(Cdc45),ENSMUSG00000000282(Mnt),ENSMUSG00000000440(Pparg),ENSMUSG00000000869(Il4),ENSMUSG00000001120(Pcbp3),ENSMUSG00000001228(Uhrf1),ENSMUSG00000001419(Mef2d),ENSMUSG00000001761(Smo),ENSMUSG00000002409(Dyrk1b),ENSMUSG00000002486(Tchp),ENSMUSG00000002617(Zfp40),ENSMUSG00000002625(Akap8l),ENSMUSG00000002968(Med25),ENSMUSG00000003190(Bcl2l12),ENSMUSG00000003282(Plag1),ENSMUSG00000…
BP	GO:1903706	regulation of hemopoiesis	118	52	170	403	5.84336e-20	4.63968e-18	ENSMUSG00000000248(Clec2g),ENSMUSG00000000409(Lck),ENSMUSG00000000532(Acvr1b),ENSMUSG00000000957(Mmp14),ENSMUSG00000000982(Ccl3),ENSMUSG00000001123(Lgals9),ENSMUSG00000001288(Rarg),ENSMUSG00000001786(Fbxo7),ENSMUSG00000002111(Spi1),ENSMUSG00000002413(Braf),ENSMUSG00000002602(Axl),ENSMUSG00000004040(Stat3),ENSMUSG00000004043(Stat5a),ENSMUSG00000004266(Ptpn6),ENSMUSG00000004296(Il12b),ENSMUSG000000…	ENSMUSG00000000869(Il4),ENSMUSG00000003882(Il7r),ENSMUSG00000005583(Mef2c),ENSMUSG00000016493(Cd46),ENSMUSG00000017697(Ada),ENSMUSG00000020167(Tcf3),ENSMUSG00000020689(Itgb3),ENSMUSG00000021127(Zfp36l1),ENSMUSG00000021250(Fos),ENSMUSG00000022105(Rb1),ENSMUSG00000022672(Prkdc),ENSMUSG00000025223(Ldb1),ENSMUSG00000025880(Smad7),ENSMUSG00000026012(Cd28),ENSMUSG00000026117(Zap70),ENSMUSG00000026288(I…
MF	GO:0032559	adenyl ribonucleotide binding	235	254	489	1545	6.97853e-20	5.51438e-18	ENSMUSG00000000409(Lck),ENSMUSG00000000532(Acvr1b),ENSMUSG00000000628(Hk2),ENSMUSG00000001416(Cct3),ENSMUSG00000001630(Stk38l),ENSMUSG00000002227(Mov10),ENSMUSG00000002413(Braf),ENSMUSG00000002602(Axl),ENSMUSG00000002997(Prkar2b),ENSMUSG00000003119(Cdk12),ENSMUSG00000003283(Hck),ENSMUSG00000003752(Itpkc),ENSMUSG00000003808(Farsa),ENSMUSG00000004085(Map3k20),ENSMUSG00000004317(Clcn5),ENSMUSG000000…	ENSMUSG00000000631(Myo18a),ENSMUSG00000001436(Slc19a1),ENSMUSG00000001755(Coasy),ENSMUSG00000002409(Dyrk1b),ENSMUSG00000002870(Mcm2),ENSMUSG00000003809(Gcdh),ENSMUSG00000004187(Kifc2),ENSMUSG00000004347(Pde1c),ENSMUSG00000004798(Ulk2),ENSMUSG00000004933(Matk),ENSMUSG00000005045(Chd5),ENSMUSG00000005102(Eif2ak4),ENSMUSG00000005370(Msh6),ENSMUSG00000005469(Prkaca),ENSMUSG00000005534(Insr),ENSMUSG00…
BP	GO:0051345	positive regulation of hydrolase activity	159	98	257	695	7.16507e-20	5.63469e-18	ENSMUSG00000000409(Lck),ENSMUSG00000000915(Hip1r),ENSMUSG00000000982(Ccl3),ENSMUSG00000001175(Calm1),ENSMUSG00000001768(Rin2),ENSMUSG00000002233(Rhoc),ENSMUSG00000003226(Ranbp2),ENSMUSG00000004040(Stat3),ENSMUSG00000004446(Bid),ENSMUSG00000004936(Map2k1),ENSMUSG00000004952(Rasa4),ENSMUSG00000005732(Ranbp1),ENSMUSG00000006134(Crkl),ENSMUSG00000007655(Cav1),ENSMUSG00000009185(Ccl8),ENSMUSG000000176…	ENSMUSG00000000440(Pparg),ENSMUSG00000001995(Sipa1l2),ENSMUSG00000002083(Bbc3),ENSMUSG00000003134(Tbc1d8),ENSMUSG00000004530(Coro1c),ENSMUSG00000004633(Chn2),ENSMUSG00000005370(Msh6),ENSMUSG00000005583(Mef2c),ENSMUSG00000005718(Tfap4),ENSMUSG00000010057(Nprl2),ENSMUSG00000011832(Evi5l),ENSMUSG00000018909(Arrb1),ENSMUSG00000019478(Rab4a),ENSMUSG00000019790(Stxbp5),ENSMUSG00000020888(Dvl2),ENSMUSG0…
BP	GO:0033036	macromolecule localization	442	392	834	2907	8.03624e-20	6.2897e-18	ENSMUSG00000000275(Trim25),ENSMUSG00000000628(Hk2),ENSMUSG00000000957(Mmp14),ENSMUSG00000001052(Sec24b),ENSMUSG00000001123(Lgals9),ENSMUSG00000001175(Calm1),ENSMUSG00000001248(Gramd1a),ENSMUSG00000001300(Efnb2),ENSMUSG00000001416(Cct3),ENSMUSG00000001440(Kpnb1),ENSMUSG00000001467(Cyp51),ENSMUSG00000001763(Tspan33),ENSMUSG00000001786(Fbxo7),ENSMUSG00000002413(Braf),ENSMUSG00000003226(Ranbp2),ENSMU…	ENSMUSG00000000440(Pparg),ENSMUSG00000000631(Myo18a),ENSMUSG00000000751(Rpa1),ENSMUSG00000001143(Lman2l),ENSMUSG00000001761(Smo),ENSMUSG00000001827(Folr1),ENSMUSG00000002031(Ift46),ENSMUSG00000002055(Spag5),ENSMUSG00000002083(Bbc3),ENSMUSG00000002625(Akap8l),ENSMUSG00000002661(Alkbh7),ENSMUSG00000002910(Arrdc2),ENSMUSG00000003134(Tbc1d8),ENSMUSG00000003346(Abhd17a),ENSMUSG00000003378(Grik5),ENSMU…
BP	GO:0051607	defense response to virus	98	23	121	253	8.76744e-20	6.82946e-18	ENSMUSG00000000275(Trim25),ENSMUSG00000000776(Polr3d),ENSMUSG00000000791(Il12rb1),ENSMUSG00000001166(Oas1c),ENSMUSG00000001168(Oas1h),ENSMUSG00000002227(Mov10),ENSMUSG00000004296(Il12b),ENSMUSG00000006205(Htra1),ENSMUSG00000012519(Mlkl),ENSMUSG00000017652(Cd40),ENSMUSG00000017830(Dhx58),ENSMUSG00000018583(G3bp1),ENSMUSG00000018899(Irf1),ENSMUSG00000019842(Traf3ip2),ENSMUSG00000020075(Ddx21),ENSMU…	ENSMUSG00000000869(Il4),ENSMUSG00000005102(Eif2ak4),ENSMUSG00000010047(Hyal2),ENSMUSG00000018428(Akap1),ENSMUSG00000020823(Sec14l1),ENSMUSG00000021703(Serinc5),ENSMUSG00000022051(Bnip3l),ENSMUSG00000022476(Polr3h),ENSMUSG00000024978(Gpam),ENSMUSG00000027843(Ptpn22),ENSMUSG00000029165(Agbl5),ENSMUSG00000030314(Atg7),ENSMUSG00000031077(Fadd),ENSMUSG00000032109(Nlrx1),ENSMUSG00000034292(Traf3ip1),EN…
BP	GO:0016070	RNA metabolic process	640	568	1208	4454	9.48393e-20	7.35273e-18	ENSMUSG00000000078(Klf6),ENSMUSG00000000247(Lhx2),ENSMUSG00000000275(Trim25),ENSMUSG00000000532(Acvr1b),ENSMUSG00000000568(Hnrnpd),ENSMUSG00000000708(Kat2b),ENSMUSG00000000730(Dnmt3l),ENSMUSG00000000776(Polr3d),ENSMUSG00000000838(Fmr1),ENSMUSG00000000982(Ccl3),ENSMUSG00000001156(Mxd1),ENSMUSG00000001166(Oas1c),ENSMUSG00000001168(Oas1h),ENSMUSG00000001288(Rarg),ENSMUSG00000001542(Ell2),ENSMUSG0000…	ENSMUSG00000000028(Cdc45),ENSMUSG00000000282(Mnt),ENSMUSG00000000440(Pparg),ENSMUSG00000000869(Il4),ENSMUSG00000001120(Pcbp3),ENSMUSG00000001228(Uhrf1),ENSMUSG00000001419(Mef2d),ENSMUSG00000001761(Smo),ENSMUSG00000002409(Dyrk1b),ENSMUSG00000002486(Tchp),ENSMUSG00000002617(Zfp40),ENSMUSG00000002625(Akap8l),ENSMUSG00000002731(Prkra),ENSMUSG00000002968(Med25),ENSMUSG00000003190(Bcl2l12),ENSMUSG00000…
BP	GO:0050727	regulation of inflammatory response	112	40	152	348	1.09323e-19	8.43587e-18	ENSMUSG00000000982(Ccl3),ENSMUSG00000001123(Lgals9),ENSMUSG00000001348(Acp5),ENSMUSG00000002897(Il17ra),ENSMUSG00000004040(Stat3),ENSMUSG00000004043(Stat5a),ENSMUSG00000004296(Il12b),ENSMUSG00000005779(Psmb4),ENSMUSG00000010358(Ifi35),ENSMUSG00000015947(Fcgr1),ENSMUSG00000016529(Il10),ENSMUSG00000017631(Abr),ENSMUSG00000018500(Adora2b),ENSMUSG00000019850(Tnfaip3),ENSMUSG00000020122(Egfr),ENSMUSG0…	ENSMUSG00000000440(Pparg),ENSMUSG00000000869(Il4),ENSMUSG00000001741(Il16),ENSMUSG00000005951(Shpk),ENSMUSG00000010047(Hyal2),ENSMUSG00000013707(Tnfaip8l2),ENSMUSG00000014158(Trpv4),ENSMUSG00000017697(Ada),ENSMUSG00000020263(Appl2),ENSMUSG00000020889(Nr1d1),ENSMUSG00000021775(Nr1d2),ENSMUSG00000022105(Rb1),ENSMUSG00000022667(Cd200r1),ENSMUSG00000024975(Pdcd4),ENSMUSG00000026012(Cd28),ENSMUSG00000…
BP	GO:0048731	system development	704	587	1291	4808	1.3212e-19	1.01473e-17	ENSMUSG00000000001(Gnai3),ENSMUSG00000000247(Lhx2),ENSMUSG00000000248(Clec2g),ENSMUSG00000000409(Lck),ENSMUSG00000000532(Acvr1b),ENSMUSG00000000555(Itga5),ENSMUSG00000000568(Hnrnpd),ENSMUSG00000000600(Krit1),ENSMUSG00000000628(Hk2),ENSMUSG00000000708(Kat2b),ENSMUSG00000000730(Dnmt3l),ENSMUSG00000000732(Icosl),ENSMUSG00000000838(Fmr1),ENSMUSG00000000915(Hip1r),ENSMUSG00000000957(Mmp14),ENSMUSG0000…	ENSMUSG00000000440(Pparg),ENSMUSG00000000751(Rpa1),ENSMUSG00000000869(Il4),ENSMUSG00000001036(Epn2),ENSMUSG00000001053(N4bp3),ENSMUSG00000001227(Sema6b),ENSMUSG00000001419(Mef2d),ENSMUSG00000001751(Naglu),ENSMUSG00000001761(Smo),ENSMUSG00000001827(Folr1),ENSMUSG00000002274(Metrn),ENSMUSG00000002289(Angptl4),ENSMUSG00000002409(Dyrk1b),ENSMUSG00000002731(Prkra),ENSMUSG00000002803(Btbd6),ENSMUSG0000…
MF	GO:0030554	adenyl nucleotide binding	235	256	491	1558	1.49143e-19	1.14014e-17	ENSMUSG00000000409(Lck),ENSMUSG00000000532(Acvr1b),ENSMUSG00000000628(Hk2),ENSMUSG00000001416(Cct3),ENSMUSG00000001630(Stk38l),ENSMUSG00000002227(Mov10),ENSMUSG00000002413(Braf),ENSMUSG00000002602(Axl),ENSMUSG00000002997(Prkar2b),ENSMUSG00000003119(Cdk12),ENSMUSG00000003283(Hck),ENSMUSG00000003752(Itpkc),ENSMUSG00000003808(Farsa),ENSMUSG00000004085(Map3k20),ENSMUSG00000004317(Clcn5),ENSMUSG000000…	ENSMUSG00000000631(Myo18a),ENSMUSG00000001436(Slc19a1),ENSMUSG00000001755(Coasy),ENSMUSG00000002409(Dyrk1b),ENSMUSG00000002870(Mcm2),ENSMUSG00000003809(Gcdh),ENSMUSG00000004187(Kifc2),ENSMUSG00000004347(Pde1c),ENSMUSG00000004798(Ulk2),ENSMUSG00000004933(Matk),ENSMUSG00000005045(Chd5),ENSMUSG00000005102(Eif2ak4),ENSMUSG00000005370(Msh6),ENSMUSG00000005469(Prkaca),ENSMUSG00000005534(Insr),ENSMUSG00…
BP	GO:0034341	response to interferon-gamma	76	6	82	145	1.74211e-19	1.32561e-17	ENSMUSG00000000791(Il12rb1),ENSMUSG00000000982(Ccl3),ENSMUSG00000004296(Il12b),ENSMUSG00000006740(Kif5b),ENSMUSG00000009185(Ccl8),ENSMUSG00000017652(Cd40),ENSMUSG00000018160(Med1),ENSMUSG00000018899(Irf1),ENSMUSG00000018920(Cxcl16),ENSMUSG00000018930(Ccl4),ENSMUSG00000019122(Ccl9),ENSMUSG00000019471(Cdc37),ENSMUSG00000020152(Actr2),ENSMUSG00000020826(Nos2),ENSMUSG00000021367(Edn1),ENSMUSG00000022…	ENSMUSG00000000440(Pparg),ENSMUSG00000000631(Myo18a),ENSMUSG00000020546(Stxbp4),ENSMUSG00000031988(Vps26b),ENSMUSG00000051343(Rab11fip5),ENSMUSG00000052688(Rab7b)
BP	GO:0051641	cellular localization	417	375	792	2745	1.80886e-19	1.36766e-17	ENSMUSG00000000409(Lck),ENSMUSG00000000628(Hk2),ENSMUSG00000000957(Mmp14),ENSMUSG00000000982(Ccl3),ENSMUSG00000001052(Sec24b),ENSMUSG00000001123(Lgals9),ENSMUSG00000001175(Calm1),ENSMUSG00000001300(Efnb2),ENSMUSG00000001416(Cct3),ENSMUSG00000001440(Kpnb1),ENSMUSG00000001763(Tspan33),ENSMUSG00000001786(Fbxo7),ENSMUSG00000002413(Braf),ENSMUSG00000003226(Ranbp2),ENSMUSG00000003352(Cacnb3),ENSMUSG000…	ENSMUSG00000000751(Rpa1),ENSMUSG00000000869(Il4),ENSMUSG00000001143(Lman2l),ENSMUSG00000001482(Def8),ENSMUSG00000001761(Smo),ENSMUSG00000001827(Folr1),ENSMUSG00000002031(Ift46),ENSMUSG00000002055(Spag5),ENSMUSG00000002083(Bbc3),ENSMUSG00000002625(Akap8l),ENSMUSG00000003134(Tbc1d8),ENSMUSG00000003346(Abhd17a),ENSMUSG00000003378(Grik5),ENSMUSG00000003452(Bicd1),ENSMUSG00000004347(Pde1c),ENSMUSG0000…
CC	GO:0012505	endomembrane system	613	479	1092	3997	1.81401e-19	1.36766e-17	ENSMUSG00000000001(Gnai3),ENSMUSG00000000184(Ccnd2),ENSMUSG00000000555(Itga5),ENSMUSG00000000628(Hk2),ENSMUSG00000000915(Hip1r),ENSMUSG00000000957(Mmp14),ENSMUSG00000001052(Sec24b),ENSMUSG00000001175(Calm1),ENSMUSG00000001248(Gramd1a),ENSMUSG00000001440(Kpnb1),ENSMUSG00000001467(Cyp51),ENSMUSG00000001785(Pwp1),ENSMUSG00000002105(Slc39a13),ENSMUSG00000002845(Tmem39a),ENSMUSG00000002847(Pla1a),ENSM…	ENSMUSG00000000631(Myo18a),ENSMUSG00000001036(Epn2),ENSMUSG00000001143(Lman2l),ENSMUSG00000001761(Smo),ENSMUSG00000001827(Folr1),ENSMUSG00000001865(Cpa3),ENSMUSG00000001930(Vwf),ENSMUSG00000002083(Bbc3),ENSMUSG00000002308(Cd320),ENSMUSG00000003153(Slc2a3),ENSMUSG00000003346(Abhd17a),ENSMUSG00000003378(Grik5),ENSMUSG00000003452(Bicd1),ENSMUSG00000004071(Cdip1),ENSMUSG00000004530(Coro1c),ENSMUSG000…
BP	GO:0010942	positive regulation of cell death	163	93	256	696	1.90996e-19	1.43343e-17	ENSMUSG00000000409(Lck),ENSMUSG00000000915(Hip1r),ENSMUSG00000000982(Ccl3),ENSMUSG00000001288(Rarg),ENSMUSG00000001300(Efnb2),ENSMUSG00000001435(Col18a1),ENSMUSG00000001707(Eef1e1),ENSMUSG00000002307(Daxx),ENSMUSG00000004085(Map3k20),ENSMUSG00000004296(Il12b),ENSMUSG00000004446(Bid),ENSMUSG00000005413(Hmox1),ENSMUSG00000006818(Sod2),ENSMUSG00000007655(Cav1),ENSMUSG00000014349(Ube2z),ENSMUSG000000…	ENSMUSG00000000440(Pparg),ENSMUSG00000002083(Bbc3),ENSMUSG00000002731(Prkra),ENSMUSG00000003378(Grik5),ENSMUSG00000005583(Mef2c),ENSMUSG00000005718(Tfap4),ENSMUSG00000006435(Neurl1a),ENSMUSG00000006728(Cdk4),ENSMUSG00000007613(Tgfbr1),ENSMUSG00000010047(Hyal2),ENSMUSG00000010751(Tnfrsf22),ENSMUSG00000014748(Tex261),ENSMUSG00000015337(Endog),ENSMUSG00000015846(Rxra),ENSMUSG00000016349(Eef1a2),ENSM…
BP	GO:1902105	regulation of leukocyte differentiation	91	42	133	291	1.92959e-19	1.44158e-17	ENSMUSG00000000248(Clec2g),ENSMUSG00000000409(Lck),ENSMUSG00000000957(Mmp14),ENSMUSG00000000982(Ccl3),ENSMUSG00000001123(Lgals9),ENSMUSG00000001786(Fbxo7),ENSMUSG00000002413(Braf),ENSMUSG00000002602(Axl),ENSMUSG00000004043(Stat5a),ENSMUSG00000004266(Ptpn6),ENSMUSG00000004296(Il12b),ENSMUSG00000014599(Csf1),ENSMUSG00000015396(Cd83),ENSMUSG00000016206(H2-M3),ENSMUSG00000016529(Il10),ENSMUSG00000018…	ENSMUSG00000000869(Il4),ENSMUSG00000003882(Il7r),ENSMUSG00000016493(Cd46),ENSMUSG00000017697(Ada),ENSMUSG00000020689(Itgb3),ENSMUSG00000021127(Zfp36l1),ENSMUSG00000021250(Fos),ENSMUSG00000022105(Rb1),ENSMUSG00000022672(Prkdc),ENSMUSG00000025880(Smad7),ENSMUSG00000026012(Cd28),ENSMUSG00000026117(Zap70),ENSMUSG00000026288(Inpp5d),ENSMUSG00000026842(Abl1),ENSMUSG00000027239(Mdk),ENSMUSG00000027339(R…
BP	GO:0043068	positive regulation of programmed cell death	151	87	238	634	2.02445e-19	1.5056e-17	ENSMUSG00000000409(Lck),ENSMUSG00000000915(Hip1r),ENSMUSG00000000982(Ccl3),ENSMUSG00000001288(Rarg),ENSMUSG00000001435(Col18a1),ENSMUSG00000001707(Eef1e1),ENSMUSG00000004085(Map3k20),ENSMUSG00000004296(Il12b),ENSMUSG00000004446(Bid),ENSMUSG00000005413(Hmox1),ENSMUSG00000006818(Sod2),ENSMUSG00000007655(Cav1),ENSMUSG00000014349(Ube2z),ENSMUSG00000015312(Gadd45b),ENSMUSG00000016206(H2-M3),ENSMUSG000…	ENSMUSG00000000440(Pparg),ENSMUSG00000002083(Bbc3),ENSMUSG00000002731(Prkra),ENSMUSG00000003378(Grik5),ENSMUSG00000005583(Mef2c),ENSMUSG00000005718(Tfap4),ENSMUSG00000006435(Neurl1a),ENSMUSG00000006728(Cdk4),ENSMUSG00000007613(Tgfbr1),ENSMUSG00000010047(Hyal2),ENSMUSG00000010751(Tnfrsf22),ENSMUSG00000014748(Tex261),ENSMUSG00000015337(Endog),ENSMUSG00000015846(Rxra),ENSMUSG00000016349(Eef1a2),ENSM…
BP	GO:0032496	response to lipopolysaccharide	122	33	155	360	2.52493e-19	1.86936e-17	ENSMUSG00000000982(Ccl3),ENSMUSG00000001123(Lgals9),ENSMUSG00000001348(Acp5),ENSMUSG00000002602(Axl),ENSMUSG00000004296(Il12b),ENSMUSG00000006818(Sod2),ENSMUSG00000015305(Sash1),ENSMUSG00000015755(Tab2),ENSMUSG00000016496(Cd274),ENSMUSG00000016528(Mapkapk2),ENSMUSG00000016529(Il10),ENSMUSG00000017002(Slpi),ENSMUSG00000017631(Abr),ENSMUSG00000017652(Cd40),ENSMUSG00000018920(Cxcl16),ENSMUSG00000019…	ENSMUSG00000000326(Comt),ENSMUSG00000005583(Mef2c),ENSMUSG00000005951(Shpk),ENSMUSG00000006344(Ggt5),ENSMUSG00000006728(Cdk4),ENSMUSG00000008855(Hdac5),ENSMUSG00000020167(Tcf3),ENSMUSG00000020399(Havcr2),ENSMUSG00000020889(Nr1d1),ENSMUSG00000021250(Fos),ENSMUSG00000021699(Pde4d),ENSMUSG00000024975(Pdcd4),ENSMUSG00000025586(Cpeb1),ENSMUSG00000026842(Abl1),ENSMUSG00000027843(Ptpn22),ENSMUSG00000028…
BP	GO:0007159	leukocyte cell-cell adhesion	106	41	147	335	2.61832e-19	1.92981e-17	ENSMUSG00000000409(Lck),ENSMUSG00000000555(Itga5),ENSMUSG00000000732(Icosl),ENSMUSG00000000791(Il12rb1),ENSMUSG00000001123(Lgals9),ENSMUSG00000001300(Efnb2),ENSMUSG00000004043(Stat5a),ENSMUSG00000004266(Ptpn6),ENSMUSG00000004296(Il12b),ENSMUSG00000004709(Cd244a),ENSMUSG00000005087(Cd44),ENSMUSG00000007655(Cav1),ENSMUSG00000015316(Slamf1),ENSMUSG00000015396(Cd83),ENSMUSG00000016206(H2-M3),ENSMUSG0…	ENSMUSG00000000869(Il4),ENSMUSG00000003518(Dusp3),ENSMUSG00000003882(Il7r),ENSMUSG00000013707(Tnfaip8l2),ENSMUSG00000016493(Cd46),ENSMUSG00000017697(Ada),ENSMUSG00000020399(Havcr2),ENSMUSG00000021756(Il6st),ENSMUSG00000022367(Has2),ENSMUSG00000023915(Tnfrsf21),ENSMUSG00000024978(Gpam),ENSMUSG00000025880(Smad7),ENSMUSG00000026012(Cd28),ENSMUSG00000026117(Zap70),ENSMUSG00000027239(Mdk),ENSMUSG00000…
BP	GO:0045595	regulation of cell differentiation	339	243	582	1915	2.96894e-19	2.17846e-17	ENSMUSG00000000247(Lhx2),ENSMUSG00000000248(Clec2g),ENSMUSG00000000409(Lck),ENSMUSG00000000532(Acvr1b),ENSMUSG00000000708(Kat2b),ENSMUSG00000000957(Mmp14),ENSMUSG00000000982(Ccl3),ENSMUSG00000001123(Lgals9),ENSMUSG00000001288(Rarg),ENSMUSG00000001300(Efnb2),ENSMUSG00000001627(Ifrd1),ENSMUSG00000001768(Rin2),ENSMUSG00000001785(Pwp1),ENSMUSG00000001786(Fbxo7),ENSMUSG00000002111(Spi1),ENSMUSG0000000…	ENSMUSG00000000440(Pparg),ENSMUSG00000000869(Il4),ENSMUSG00000001227(Sema6b),ENSMUSG00000001761(Smo),ENSMUSG00000002274(Metrn),ENSMUSG00000003282(Plag1),ENSMUSG00000003575(Crtc1),ENSMUSG00000003882(Il7r),ENSMUSG00000004099(Dnmt1),ENSMUSG00000004530(Coro1c),ENSMUSG00000004798(Ulk2),ENSMUSG00000005045(Chd5),ENSMUSG00000005102(Eif2ak4),ENSMUSG00000005469(Prkaca),ENSMUSG00000005514(Por),ENSMUSG000000…
BP	GO:0009894	regulation of catabolic process	180	124	304	868	3.08712e-19	2.25511e-17	ENSMUSG00000000001(Gnai3),ENSMUSG00000000568(Hnrnpd),ENSMUSG00000000628(Hk2),ENSMUSG00000001467(Cyp51),ENSMUSG00000001786(Fbxo7),ENSMUSG00000002227(Mov10),ENSMUSG00000002845(Tmem39a),ENSMUSG00000003308(Keap1),ENSMUSG00000004040(Stat3),ENSMUSG00000004221(Ikbkg),ENSMUSG00000004446(Bid),ENSMUSG00000004451(Ralb),ENSMUSG00000004936(Map2k1),ENSMUSG00000005312(Ubqln1),ENSMUSG00000005413(Hmox1),ENSMUSG00…	ENSMUSG00000000149(Gna12),ENSMUSG00000000869(Il4),ENSMUSG00000004798(Ulk2),ENSMUSG00000005102(Eif2ak4),ENSMUSG00000005469(Prkaca),ENSMUSG00000005534(Insr),ENSMUSG00000006019(Dhx34),ENSMUSG00000006362(Cbfa2t3),ENSMUSG00000006728(Cdk4),ENSMUSG00000010057(Nprl2),ENSMUSG00000013622(Atraid),ENSMUSG00000015337(Endog),ENSMUSG00000018669(Cdk5rap3),ENSMUSG00000019302(Atp6v0a1),ENSMUSG00000020883(Fbxl20),E…
BP	GO:0031329	regulation of cellular catabolic process	156	107	263	724	4.08106e-19	2.96797e-17	ENSMUSG00000000001(Gnai3),ENSMUSG00000000568(Hnrnpd),ENSMUSG00000000628(Hk2),ENSMUSG00000001786(Fbxo7),ENSMUSG00000002227(Mov10),ENSMUSG00000002845(Tmem39a),ENSMUSG00000003308(Keap1),ENSMUSG00000004040(Stat3),ENSMUSG00000004221(Ikbkg),ENSMUSG00000004446(Bid),ENSMUSG00000004451(Ralb),ENSMUSG00000004936(Map2k1),ENSMUSG00000005312(Ubqln1),ENSMUSG00000005413(Hmox1),ENSMUSG00000005610(Eif4g2),ENSMUSG0…	ENSMUSG00000000149(Gna12),ENSMUSG00000000869(Il4),ENSMUSG00000004798(Ulk2),ENSMUSG00000005102(Eif2ak4),ENSMUSG00000005469(Prkaca),ENSMUSG00000005534(Insr),ENSMUSG00000006019(Dhx34),ENSMUSG00000006362(Cbfa2t3),ENSMUSG00000010057(Nprl2),ENSMUSG00000013622(Atraid),ENSMUSG00000015337(Endog),ENSMUSG00000018669(Cdk5rap3),ENSMUSG00000019302(Atp6v0a1),ENSMUSG00000021127(Zfp36l1),ENSMUSG00000021236(Entpd5…
MF	GO:0005524	ATP binding	226	242	468	1479	5.1306e-19	3.71483e-17	ENSMUSG00000000409(Lck),ENSMUSG00000000532(Acvr1b),ENSMUSG00000000628(Hk2),ENSMUSG00000001416(Cct3),ENSMUSG00000001630(Stk38l),ENSMUSG00000002227(Mov10),ENSMUSG00000002413(Braf),ENSMUSG00000002602(Axl),ENSMUSG00000003119(Cdk12),ENSMUSG00000003283(Hck),ENSMUSG00000003752(Itpkc),ENSMUSG00000003808(Farsa),ENSMUSG00000004085(Map3k20),ENSMUSG00000004317(Clcn5),ENSMUSG00000004591(Pkn2),ENSMUSG000000046…	ENSMUSG00000000631(Myo18a),ENSMUSG00000001755(Coasy),ENSMUSG00000002409(Dyrk1b),ENSMUSG00000002870(Mcm2),ENSMUSG00000004187(Kifc2),ENSMUSG00000004798(Ulk2),ENSMUSG00000004933(Matk),ENSMUSG00000005045(Chd5),ENSMUSG00000005102(Eif2ak4),ENSMUSG00000005370(Msh6),ENSMUSG00000005469(Prkaca),ENSMUSG00000005534(Insr),ENSMUSG00000005580(Adcy9),ENSMUSG00000005951(Shpk),ENSMUSG00000005958(Ephb3),ENSMUSG0000…
BP	GO:0002521	leukocyte differentiation	142	74	216	563	5.34638e-19	3.85409e-17	ENSMUSG00000000248(Clec2g),ENSMUSG00000000409(Lck),ENSMUSG00000000957(Mmp14),ENSMUSG00000000982(Ccl3),ENSMUSG00000001123(Lgals9),ENSMUSG00000001786(Fbxo7),ENSMUSG00000002111(Spi1),ENSMUSG00000002413(Braf),ENSMUSG00000002602(Axl),ENSMUSG00000002983(Relb),ENSMUSG00000003070(Efna2),ENSMUSG00000004040(Stat3),ENSMUSG00000004043(Stat5a),ENSMUSG00000004266(Ptpn6),ENSMUSG00000004296(Il12b),ENSMUSG0000000…	ENSMUSG00000000440(Pparg),ENSMUSG00000000869(Il4),ENSMUSG00000003882(Il7r),ENSMUSG00000005583(Mef2c),ENSMUSG00000006362(Cbfa2t3),ENSMUSG00000007476(Lrrc8a),ENSMUSG00000010054(Tusc2),ENSMUSG00000016493(Cd46),ENSMUSG00000017697(Ada),ENSMUSG00000020167(Tcf3),ENSMUSG00000020453(Patz1),ENSMUSG00000020605(Hs1bp3),ENSMUSG00000020689(Itgb3),ENSMUSG00000021127(Zfp36l1),ENSMUSG00000021250(Fos),ENSMUSG00000…
BP	GO:0008104	protein localization	385	348	733	2519	6.0329e-19	4.31947e-17	ENSMUSG00000000275(Trim25),ENSMUSG00000000628(Hk2),ENSMUSG00000000957(Mmp14),ENSMUSG00000001052(Sec24b),ENSMUSG00000001123(Lgals9),ENSMUSG00000001175(Calm1),ENSMUSG00000001300(Efnb2),ENSMUSG00000001416(Cct3),ENSMUSG00000001440(Kpnb1),ENSMUSG00000001467(Cyp51),ENSMUSG00000001763(Tspan33),ENSMUSG00000001786(Fbxo7),ENSMUSG00000002413(Braf),ENSMUSG00000003226(Ranbp2),ENSMUSG00000003308(Keap1),ENSMUSG…	ENSMUSG00000000440(Pparg),ENSMUSG00000000631(Myo18a),ENSMUSG00000000751(Rpa1),ENSMUSG00000001143(Lman2l),ENSMUSG00000001761(Smo),ENSMUSG00000001827(Folr1),ENSMUSG00000002031(Ift46),ENSMUSG00000002055(Spag5),ENSMUSG00000002083(Bbc3),ENSMUSG00000002625(Akap8l),ENSMUSG00000002910(Arrdc2),ENSMUSG00000003134(Tbc1d8),ENSMUSG00000003346(Abhd17a),ENSMUSG00000003378(Grik5),ENSMUSG00000003452(Bicd1),ENSMUS…
BP	GO:0051172	negative regulation of nitrogen compound metabolic process	397	334	731	2511	6.04453e-19	4.31947e-17	ENSMUSG00000000568(Hnrnpd),ENSMUSG00000000708(Kat2b),ENSMUSG00000000730(Dnmt3l),ENSMUSG00000000838(Fmr1),ENSMUSG00000000983(Wfdc18),ENSMUSG00000001156(Mxd1),ENSMUSG00000001288(Rarg),ENSMUSG00000001348(Acp5),ENSMUSG00000001467(Cyp51),ENSMUSG00000001785(Pwp1),ENSMUSG00000001786(Fbxo7),ENSMUSG00000002111(Spi1),ENSMUSG00000002227(Mov10),ENSMUSG00000002307(Daxx),ENSMUSG00000002578(Ikzf4),ENSMUSG000000…	ENSMUSG00000000028(Cdc45),ENSMUSG00000000282(Mnt),ENSMUSG00000000326(Comt),ENSMUSG00000000440(Pparg),ENSMUSG00000000869(Il4),ENSMUSG00000001120(Pcbp3),ENSMUSG00000001228(Uhrf1),ENSMUSG00000001761(Smo),ENSMUSG00000002968(Med25),ENSMUSG00000003190(Bcl2l12),ENSMUSG00000003518(Dusp3),ENSMUSG00000004099(Dnmt1),ENSMUSG00000004530(Coro1c),ENSMUSG00000005045(Chd5),ENSMUSG00000005102(Eif2ak4),ENSMUSG00000…
BP	GO:0043065	positive regulation of apoptotic process	149	86	235	629	6.8117e-19	4.84663e-17	ENSMUSG00000000409(Lck),ENSMUSG00000000915(Hip1r),ENSMUSG00000000982(Ccl3),ENSMUSG00000001288(Rarg),ENSMUSG00000001435(Col18a1),ENSMUSG00000001707(Eef1e1),ENSMUSG00000004085(Map3k20),ENSMUSG00000004296(Il12b),ENSMUSG00000004446(Bid),ENSMUSG00000005413(Hmox1),ENSMUSG00000006818(Sod2),ENSMUSG00000007655(Cav1),ENSMUSG00000014349(Ube2z),ENSMUSG00000015312(Gadd45b),ENSMUSG00000016206(H2-M3),ENSMUSG000…	ENSMUSG00000000440(Pparg),ENSMUSG00000002083(Bbc3),ENSMUSG00000002731(Prkra),ENSMUSG00000003378(Grik5),ENSMUSG00000005583(Mef2c),ENSMUSG00000005718(Tfap4),ENSMUSG00000006435(Neurl1a),ENSMUSG00000006728(Cdk4),ENSMUSG00000007613(Tgfbr1),ENSMUSG00000010047(Hyal2),ENSMUSG00000010751(Tnfrsf22),ENSMUSG00000014748(Tex261),ENSMUSG00000015337(Endog),ENSMUSG00000015846(Rxra),ENSMUSG00000016349(Eef1a2),ENSM…
BP	GO:0051251	positive regulation of lymphocyte activation	79	45	124	268	9.3889e-19	6.65155e-17	ENSMUSG00000000409(Lck),ENSMUSG00000000732(Icosl),ENSMUSG00000000791(Il12rb1),ENSMUSG00000000957(Mmp14),ENSMUSG00000001123(Lgals9),ENSMUSG00000001300(Efnb2),ENSMUSG00000002602(Axl),ENSMUSG00000004043(Stat5a),ENSMUSG00000004296(Il12b),ENSMUSG00000004709(Cd244a),ENSMUSG00000007655(Cav1),ENSMUSG00000015316(Slamf1),ENSMUSG00000015396(Cd83),ENSMUSG00000016206(H2-M3),ENSMUSG00000016496(Cd274),ENSMUSG00…	ENSMUSG00000000869(Il4),ENSMUSG00000002308(Cd320),ENSMUSG00000003882(Il7r),ENSMUSG00000005583(Mef2c),ENSMUSG00000016493(Cd46),ENSMUSG00000017550(Atad5),ENSMUSG00000017697(Ada),ENSMUSG00000018752(Tnfsfm13),ENSMUSG00000020167(Tcf3),ENSMUSG00000020399(Havcr2),ENSMUSG00000021756(Il6st),ENSMUSG00000022672(Prkdc),ENSMUSG00000024151(Msh2),ENSMUSG00000024978(Gpam),ENSMUSG00000026012(Cd28),ENSMUSG00000026…
BP	GO:0046649	lymphocyte activation	164	89	253	694	1.17798e-18	8.30955e-17	ENSMUSG00000000409(Lck),ENSMUSG00000000732(Icosl),ENSMUSG00000000791(Il12rb1),ENSMUSG00000000957(Mmp14),ENSMUSG00000001123(Lgals9),ENSMUSG00000001300(Efnb2),ENSMUSG00000001786(Fbxo7),ENSMUSG00000002111(Spi1),ENSMUSG00000002413(Braf),ENSMUSG00000002602(Axl),ENSMUSG00000002983(Relb),ENSMUSG00000003206(Ebi3),ENSMUSG00000004040(Stat3),ENSMUSG00000004043(Stat5a),ENSMUSG00000004266(Ptpn6),ENSMUSG000000…	ENSMUSG00000000869(Il4),ENSMUSG00000002308(Cd320),ENSMUSG00000003518(Dusp3),ENSMUSG00000003882(Il7r),ENSMUSG00000005102(Eif2ak4),ENSMUSG00000005370(Msh6),ENSMUSG00000005583(Mef2c),ENSMUSG00000007476(Lrrc8a),ENSMUSG00000010054(Tusc2),ENSMUSG00000013707(Tnfaip8l2),ENSMUSG00000016493(Cd46),ENSMUSG00000017550(Atad5),ENSMUSG00000017697(Ada),ENSMUSG00000018752(Tnfsfm13),ENSMUSG00000020167(Tcf3),ENSMUSG…
BP	GO:0051249	regulation of lymphocyte activation	110	62	172	420	1.30755e-18	9.18412e-17	ENSMUSG00000000409(Lck),ENSMUSG00000000732(Icosl),ENSMUSG00000000791(Il12rb1),ENSMUSG00000000957(Mmp14),ENSMUSG00000001123(Lgals9),ENSMUSG00000001300(Efnb2),ENSMUSG00000001786(Fbxo7),ENSMUSG00000002413(Braf),ENSMUSG00000002602(Axl),ENSMUSG00000004043(Stat5a),ENSMUSG00000004266(Ptpn6),ENSMUSG00000004296(Il12b),ENSMUSG00000004709(Cd244a),ENSMUSG00000007655(Cav1),ENSMUSG00000015316(Slamf1),ENSMUSG00…	ENSMUSG00000000869(Il4),ENSMUSG00000002308(Cd320),ENSMUSG00000003518(Dusp3),ENSMUSG00000003882(Il7r),ENSMUSG00000005583(Mef2c),ENSMUSG00000013707(Tnfaip8l2),ENSMUSG00000016493(Cd46),ENSMUSG00000017550(Atad5),ENSMUSG00000017697(Ada),ENSMUSG00000018752(Tnfsfm13),ENSMUSG00000020167(Tcf3),ENSMUSG00000020399(Havcr2),ENSMUSG00000021127(Zfp36l1),ENSMUSG00000021756(Il6st),ENSMUSG00000022672(Prkdc),ENSMUS…
BP	GO:0040011	locomotion	340	212	552	1810	1.33583e-18	9.31528e-17	ENSMUSG00000000247(Lhx2),ENSMUSG00000000532(Acvr1b),ENSMUSG00000000555(Itga5),ENSMUSG00000000600(Krit1),ENSMUSG00000000957(Mmp14),ENSMUSG00000000982(Ccl3),ENSMUSG00000001123(Lgals9),ENSMUSG00000001300(Efnb2),ENSMUSG00000001435(Col18a1),ENSMUSG00000001768(Rin2),ENSMUSG00000001786(Fbxo7),ENSMUSG00000002233(Rhoc),ENSMUSG00000002413(Braf),ENSMUSG00000002602(Axl),ENSMUSG00000002897(Il17ra),ENSMUSG0000…	ENSMUSG00000000149(Gna12),ENSMUSG00000000440(Pparg),ENSMUSG00000000631(Myo18a),ENSMUSG00000000869(Il4),ENSMUSG00000001227(Sema6b),ENSMUSG00000001741(Il16),ENSMUSG00000001761(Smo),ENSMUSG00000001827(Folr1),ENSMUSG00000002031(Ift46),ENSMUSG00000003518(Dusp3),ENSMUSG00000004151(Etv1),ENSMUSG00000004462(Tbccd1),ENSMUSG00000004530(Coro1c),ENSMUSG00000005534(Insr),ENSMUSG00000005583(Mef2c),ENSMUSG00000…
BP	GO:0023056	positive regulation of signaling	355	188	543	1775	1.33756e-18	9.31528e-17	ENSMUSG00000000275(Trim25),ENSMUSG00000000409(Lck),ENSMUSG00000000532(Acvr1b),ENSMUSG00000000915(Hip1r),ENSMUSG00000000982(Ccl3),ENSMUSG00000001123(Lgals9),ENSMUSG00000001175(Calm1),ENSMUSG00000001707(Eef1e1),ENSMUSG00000002413(Braf),ENSMUSG00000002602(Axl),ENSMUSG00000003352(Cacnb3),ENSMUSG00000004040(Stat3),ENSMUSG00000004085(Map3k20),ENSMUSG00000004221(Ikbkg),ENSMUSG00000004266(Ptpn6),ENSMUSG0…	ENSMUSG00000000869(Il4),ENSMUSG00000001036(Epn2),ENSMUSG00000001761(Smo),ENSMUSG00000002083(Bbc3),ENSMUSG00000002731(Prkra),ENSMUSG00000003575(Crtc1),ENSMUSG00000003882(Il7r),ENSMUSG00000005045(Chd5),ENSMUSG00000005102(Eif2ak4),ENSMUSG00000005514(Por),ENSMUSG00000005534(Insr),ENSMUSG00000005583(Mef2c),ENSMUSG00000005718(Tfap4),ENSMUSG00000006235(Epor),ENSMUSG00000006435(Neurl1a),ENSMUSG0000000657…
BP	GO:0002443	leukocyte mediated immunity	110	35	145	334	1.49023e-18	1.03348e-16	ENSMUSG00000000732(Icosl),ENSMUSG00000000982(Ccl3),ENSMUSG00000001123(Lgals9),ENSMUSG00000004043(Stat5a),ENSMUSG00000004266(Ptpn6),ENSMUSG00000004296(Il12b),ENSMUSG00000005103(Wdr1),ENSMUSG00000005413(Hmox1),ENSMUSG00000015316(Slamf1),ENSMUSG00000015437(Gzmb),ENSMUSG00000015947(Fcgr1),ENSMUSG00000015950(Ncf1),ENSMUSG00000016206(H2-M3),ENSMUSG00000017631(Abr),ENSMUSG00000017652(Cd40),ENSMUSG000000…	ENSMUSG00000000869(Il4),ENSMUSG00000003882(Il7r),ENSMUSG00000005370(Msh6),ENSMUSG00000010054(Tusc2),ENSMUSG00000016493(Cd46),ENSMUSG00000017550(Atad5),ENSMUSG00000018752(Tnfsfm13),ENSMUSG00000019726(Lyst),ENSMUSG00000020399(Havcr2),ENSMUSG00000024151(Msh2),ENSMUSG00000025880(Smad7),ENSMUSG00000026012(Cd28),ENSMUSG00000026288(Inpp5d),ENSMUSG00000026471(Mr1),ENSMUSG00000029468(P2rx7),ENSMUSG0000002…
BP	GO:1903047	mitotic cell cycle process	106	139	245	668	1.77901e-18	1.22856e-16	ENSMUSG00000000184(Ccnd2),ENSMUSG00000000532(Acvr1b),ENSMUSG00000001175(Calm1),ENSMUSG00000001440(Kpnb1),ENSMUSG00000001786(Fbxo7),ENSMUSG00000002233(Rhoc),ENSMUSG00000004085(Map3k20),ENSMUSG00000004266(Ptpn6),ENSMUSG00000004364(Cul3),ENSMUSG00000004446(Bid),ENSMUSG00000004771(Rab11a),ENSMUSG00000005732(Ranbp1),ENSMUSG00000006005(Tpr),ENSMUSG00000016477(E2f3),ENSMUSG00000017291(Taok1),ENSMUSG0000…	ENSMUSG00000000028(Cdc45),ENSMUSG00000002055(Spag5),ENSMUSG00000002625(Akap8l),ENSMUSG00000002870(Mcm2),ENSMUSG00000002871(Tpra1),ENSMUSG00000005534(Insr),ENSMUSG00000005718(Tfap4),ENSMUSG00000006678(Pola1),ENSMUSG00000006728(Cdk4),ENSMUSG00000007080(Pole),ENSMUSG00000007646(Rad51c),ENSMUSG00000010051(Hyal1),ENSMUSG00000015766(Eps8),ENSMUSG00000017146(Brca1),ENSMUSG00000017550(Atad5),ENSMUSG00000…
BP	GO:0031401	positive regulation of protein modification process	256	147	403	1242	1.81106e-18	1.24546e-16	ENSMUSG00000000184(Ccnd2),ENSMUSG00000000409(Lck),ENSMUSG00000000532(Acvr1b),ENSMUSG00000000555(Itga5),ENSMUSG00000000708(Kat2b),ENSMUSG00000000982(Ccl3),ENSMUSG00000001123(Lgals9),ENSMUSG00000001175(Calm1),ENSMUSG00000002307(Daxx),ENSMUSG00000002413(Braf),ENSMUSG00000002699(Lcp2),ENSMUSG00000003948(Mmd),ENSMUSG00000004085(Map3k20),ENSMUSG00000004221(Ikbkg),ENSMUSG00000004296(Il12b),ENSMUSG000000…	ENSMUSG00000000869(Il4),ENSMUSG00000002625(Akap8l),ENSMUSG00000004099(Dnmt1),ENSMUSG00000005102(Eif2ak4),ENSMUSG00000005534(Insr),ENSMUSG00000005583(Mef2c),ENSMUSG00000006235(Epor),ENSMUSG00000006435(Neurl1a),ENSMUSG00000007613(Tgfbr1),ENSMUSG00000013483(Card14),ENSMUSG00000014158(Trpv4),ENSMUSG00000014426(Map3k4),ENSMUSG00000016984(Etaa1),ENSMUSG00000017146(Brca1),ENSMUSG00000017466(Timp2),ENSMU…
BP	GO:0007264	small GTPase mediated signal transduction	105	66	171	418	1.86927e-18	1.28014e-16	ENSMUSG00000001098(Kctd10),ENSMUSG00000001440(Kpnb1),ENSMUSG00000002233(Rhoc),ENSMUSG00000003269(Cyth2),ENSMUSG00000004364(Cul3),ENSMUSG00000004451(Ralb),ENSMUSG00000004936(Map2k1),ENSMUSG00000004952(Rasa4),ENSMUSG00000005057(Sh2b2),ENSMUSG00000005413(Hmox1),ENSMUSG00000009376(Met),ENSMUSG00000009630(Ppp2cb),ENSMUSG00000014599(Csf1),ENSMUSG00000017144(Rnd3),ENSMUSG00000017776(Crk),ENSMUSG00000018…	ENSMUSG00000000149(Gna12),ENSMUSG00000001995(Sipa1l2),ENSMUSG00000004099(Dnmt1),ENSMUSG00000004633(Chn2),ENSMUSG00000009621(Vav2),ENSMUSG00000015697(Setdb1),ENSMUSG00000015766(Eps8),ENSMUSG00000017466(Timp2),ENSMUSG00000018909(Arrb1),ENSMUSG00000019478(Rab4a),ENSMUSG00000019852(Arfgef3),ENSMUSG00000019944(Rhobtb1),ENSMUSG00000022075(Rhobtb2),ENSMUSG00000022105(Rb1),ENSMUSG00000022469(Rapgef3),ENS…
BP	GO:0007010	cytoskeleton organization	223	218	441	1387	2.29674e-18	1.56636e-16	ENSMUSG00000000708(Kat2b),ENSMUSG00000000915(Hip1r),ENSMUSG00000000982(Ccl3),ENSMUSG00000001175(Calm1),ENSMUSG00000001440(Kpnb1),ENSMUSG00000001473(Tubb6),ENSMUSG00000002233(Rhoc),ENSMUSG00000002413(Braf),ENSMUSG00000002812(Flii),ENSMUSG00000003283(Hck),ENSMUSG00000004085(Map3k20),ENSMUSG00000004364(Cul3),ENSMUSG00000004771(Rab11a),ENSMUSG00000005057(Sh2b2),ENSMUSG00000005103(Wdr1),ENSMUSG0000000…	ENSMUSG00000000631(Myo18a),ENSMUSG00000002031(Ift46),ENSMUSG00000002055(Spag5),ENSMUSG00000003452(Bicd1),ENSMUSG00000004530(Coro1c),ENSMUSG00000005583(Mef2c),ENSMUSG00000005699(Pard6a),ENSMUSG00000006435(Neurl1a),ENSMUSG00000006464(Bbs1),ENSMUSG00000007613(Tgfbr1),ENSMUSG00000009418(Nav1),ENSMUSG00000010021(Kif19a),ENSMUSG00000012609(Ttll5),ENSMUSG00000014158(Trpv4),ENSMUSG00000014232(Cluap1),ENS…
BP	GO:0010557	positive regulation of macromolecule biosynthetic process	308	253	561	1851	2.78787e-18	1.89345e-16	ENSMUSG00000000078(Klf6),ENSMUSG00000000247(Lhx2),ENSMUSG00000000275(Trim25),ENSMUSG00000000532(Acvr1b),ENSMUSG00000000568(Hnrnpd),ENSMUSG00000000708(Kat2b),ENSMUSG00000000982(Ccl3),ENSMUSG00000001288(Rarg),ENSMUSG00000001416(Cct3),ENSMUSG00000001542(Ell2),ENSMUSG00000001627(Ifrd1),ENSMUSG00000001632(Brpf1),ENSMUSG00000001785(Pwp1),ENSMUSG00000002111(Spi1),ENSMUSG00000002307(Daxx),ENSMUSG00000002…	ENSMUSG00000000440(Pparg),ENSMUSG00000000869(Il4),ENSMUSG00000001419(Mef2d),ENSMUSG00000001761(Smo),ENSMUSG00000002409(Dyrk1b),ENSMUSG00000002617(Zfp40),ENSMUSG00000002625(Akap8l),ENSMUSG00000002968(Med25),ENSMUSG00000003190(Bcl2l12),ENSMUSG00000003282(Plag1),ENSMUSG00000003575(Crtc1),ENSMUSG00000003992(Ssbp2),ENSMUSG00000004151(Etv1),ENSMUSG00000005102(Eif2ak4),ENSMUSG00000005534(Insr),ENSMUSG00…
BP	GO:1901575	organic substance catabolic process	317	273	590	1967	3.70078e-18	2.50313e-16	ENSMUSG00000000275(Trim25),ENSMUSG00000000568(Hnrnpd),ENSMUSG00000000628(Hk2),ENSMUSG00000001098(Kctd10),ENSMUSG00000001441(Npepps),ENSMUSG00000001467(Cyp51),ENSMUSG00000001786(Fbxo7),ENSMUSG00000002227(Mov10),ENSMUSG00000002847(Pla1a),ENSMUSG00000003123(Lipe),ENSMUSG00000003308(Keap1),ENSMUSG00000003746(Man1a),ENSMUSG00000004040(Stat3),ENSMUSG00000004364(Cul3),ENSMUSG00000005087(Cd44),ENSMUSG000…	ENSMUSG00000000149(Gna12),ENSMUSG00000000326(Comt),ENSMUSG00000000673(Haao),ENSMUSG00000001054(Rmnd5b),ENSMUSG00000001228(Uhrf1),ENSMUSG00000001366(Fbxo9),ENSMUSG00000003346(Abhd17a),ENSMUSG00000003526(Prodh),ENSMUSG00000003623(Crot),ENSMUSG00000003809(Gcdh),ENSMUSG00000003812(Dnase2a),ENSMUSG00000004565(Pnpla6),ENSMUSG00000005043(Sgsh),ENSMUSG00000005447(Pafah1b3),ENSMUSG00000005469(Prkaca),ENSM…
BP	GO:0010647	positive regulation of cell communication	352	187	539	1769	4.48031e-18	3.01796e-16	ENSMUSG00000000275(Trim25),ENSMUSG00000000409(Lck),ENSMUSG00000000532(Acvr1b),ENSMUSG00000000915(Hip1r),ENSMUSG00000000982(Ccl3),ENSMUSG00000001123(Lgals9),ENSMUSG00000001175(Calm1),ENSMUSG00000001707(Eef1e1),ENSMUSG00000002413(Braf),ENSMUSG00000002602(Axl),ENSMUSG00000003352(Cacnb3),ENSMUSG00000004040(Stat3),ENSMUSG00000004085(Map3k20),ENSMUSG00000004221(Ikbkg),ENSMUSG00000004266(Ptpn6),ENSMUSG0…	ENSMUSG00000000869(Il4),ENSMUSG00000001036(Epn2),ENSMUSG00000001761(Smo),ENSMUSG00000002083(Bbc3),ENSMUSG00000002731(Prkra),ENSMUSG00000003575(Crtc1),ENSMUSG00000003882(Il7r),ENSMUSG00000005045(Chd5),ENSMUSG00000005102(Eif2ak4),ENSMUSG00000005514(Por),ENSMUSG00000005534(Insr),ENSMUSG00000005583(Mef2c),ENSMUSG00000005718(Tfap4),ENSMUSG00000006235(Epor),ENSMUSG00000006435(Neurl1a),ENSMUSG0000000657…
MF	GO:0046872	metal ion binding	502	595	1097	4036	5.26784e-18	3.53397e-16	ENSMUSG00000000001(Gnai3),ENSMUSG00000000247(Lhx2),ENSMUSG00000000275(Trim25),ENSMUSG00000000532(Acvr1b),ENSMUSG00000000555(Itga5),ENSMUSG00000000730(Dnmt3l),ENSMUSG00000000957(Mmp14),ENSMUSG00000001052(Sec24b),ENSMUSG00000001175(Calm1),ENSMUSG00000001288(Rarg),ENSMUSG00000001348(Acp5),ENSMUSG00000001435(Col18a1),ENSMUSG00000001441(Npepps),ENSMUSG00000001467(Cyp51),ENSMUSG00000001630(Stk38l),ENSM…	ENSMUSG00000000149(Gna12),ENSMUSG00000000253(Gmpr),ENSMUSG00000000326(Comt),ENSMUSG00000000440(Pparg),ENSMUSG00000000673(Haao),ENSMUSG00000000751(Rpa1),ENSMUSG00000001054(Rmnd5b),ENSMUSG00000001143(Lman2l),ENSMUSG00000001228(Uhrf1),ENSMUSG00000001482(Def8),ENSMUSG00000001865(Cpa3),ENSMUSG00000002308(Cd320),ENSMUSG00000002329(Mdp1),ENSMUSG00000002617(Zfp40),ENSMUSG00000002661(Alkbh7),ENSMUSG000000…
MF	GO:0042802	identical protein binding	367	264	631	2132	5.43254e-18	3.62964e-16	ENSMUSG00000000409(Lck),ENSMUSG00000000732(Icosl),ENSMUSG00000000915(Hip1r),ENSMUSG00000001098(Kctd10),ENSMUSG00000001435(Col18a1),ENSMUSG00000002105(Slc39a13),ENSMUSG00000002413(Braf),ENSMUSG00000002578(Ikzf4),ENSMUSG00000002797(Ggct),ENSMUSG00000002983(Relb),ENSMUSG00000003308(Keap1),ENSMUSG00000003665(Has1),ENSMUSG00000004040(Stat3),ENSMUSG00000004044(Cavin1),ENSMUSG00000004221(Ikbkg),ENSMUSG0…	ENSMUSG00000000440(Pparg),ENSMUSG00000001228(Uhrf1),ENSMUSG00000001419(Mef2d),ENSMUSG00000001930(Vwf),ENSMUSG00000002289(Angptl4),ENSMUSG00000002731(Prkra),ENSMUSG00000002835(Chaf1a),ENSMUSG00000003378(Grik5),ENSMUSG00000004032(Gstm5),ENSMUSG00000004996(Mri1),ENSMUSG00000005447(Pafah1b3),ENSMUSG00000005534(Insr),ENSMUSG00000005615(Pcyt1a),ENSMUSG00000005718(Tfap4),ENSMUSG00000006235(Epor),ENSMUSG…
BP	GO:0002250	adaptive immune response	117	46	163	396	5.89874e-18	3.92517e-16	ENSMUSG00000000732(Icosl),ENSMUSG00000000791(Il12rb1),ENSMUSG00000002897(Il17ra),ENSMUSG00000002983(Relb),ENSMUSG00000004040(Stat3),ENSMUSG00000004266(Ptpn6),ENSMUSG00000004296(Il12b),ENSMUSG00000004709(Cd244a),ENSMUSG00000004730(Adgre1),ENSMUSG00000005763(Cd247),ENSMUSG00000011008(Mcoln2),ENSMUSG00000015316(Slamf1),ENSMUSG00000015355(Cd48),ENSMUSG00000015437(Gzmb),ENSMUSG00000015947(Fcgr1),ENSMU…	ENSMUSG00000000869(Il4),ENSMUSG00000003882(Il7r),ENSMUSG00000004567(Mcoln1),ENSMUSG00000005102(Eif2ak4),ENSMUSG00000005370(Msh6),ENSMUSG00000005583(Mef2c),ENSMUSG00000016493(Cd46),ENSMUSG00000017550(Atad5),ENSMUSG00000017697(Ada),ENSMUSG00000018752(Tnfsfm13),ENSMUSG00000020399(Havcr2),ENSMUSG00000021356(Irf4),ENSMUSG00000023915(Tnfrsf21),ENSMUSG00000023990(Tfeb),ENSMUSG00000024151(Msh2),ENSMUSG00…
BP	GO:0044087	regulation of cellular component biogenesis	176	153	329	975	5.98379e-18	3.96571e-16	ENSMUSG00000000708(Kat2b),ENSMUSG00000000915(Hip1r),ENSMUSG00000000957(Mmp14),ENSMUSG00000002233(Rhoc),ENSMUSG00000002413(Braf),ENSMUSG00000002812(Flii),ENSMUSG00000002845(Tmem39a),ENSMUSG00000003283(Hck),ENSMUSG00000004446(Bid),ENSMUSG00000004451(Ralb),ENSMUSG00000006005(Tpr),ENSMUSG00000006058(Snf8),ENSMUSG00000007655(Cav1),ENSMUSG00000008475(Arpc5),ENSMUSG00000008892(Vdac3),ENSMUSG00000009376(…	ENSMUSG00000001482(Def8),ENSMUSG00000002031(Ift46),ENSMUSG00000002055(Spag5),ENSMUSG00000002083(Bbc3),ENSMUSG00000002486(Tchp),ENSMUSG00000002968(Med25),ENSMUSG00000003518(Dusp3),ENSMUSG00000004099(Dnmt1),ENSMUSG00000004530(Coro1c),ENSMUSG00000005469(Prkaca),ENSMUSG00000005583(Mef2c),ENSMUSG00000005958(Ephb3),ENSMUSG00000006219(Fblim1),ENSMUSG00000006435(Neurl1a),ENSMUSG00000007613(Tgfbr1),ENSMUS…
BP	GO:0032879	regulation of localization	458	341	799	2809	6.9717e-18	4.60188e-16	ENSMUSG00000000275(Trim25),ENSMUSG00000000409(Lck),ENSMUSG00000000532(Acvr1b),ENSMUSG00000000555(Itga5),ENSMUSG00000000600(Krit1),ENSMUSG00000000628(Hk2),ENSMUSG00000000915(Hip1r),ENSMUSG00000000957(Mmp14),ENSMUSG00000000982(Ccl3),ENSMUSG00000001052(Sec24b),ENSMUSG00000001123(Lgals9),ENSMUSG00000001175(Calm1),ENSMUSG00000001300(Efnb2),ENSMUSG00000001416(Cct3),ENSMUSG00000001435(Col18a1),ENSMUSG00…	ENSMUSG00000000149(Gna12),ENSMUSG00000000326(Comt),ENSMUSG00000000440(Pparg),ENSMUSG00000000631(Myo18a),ENSMUSG00000000869(Il4),ENSMUSG00000001036(Epn2),ENSMUSG00000001227(Sema6b),ENSMUSG00000001741(Il16),ENSMUSG00000001761(Smo),ENSMUSG00000002055(Spag5),ENSMUSG00000002083(Bbc3),ENSMUSG00000002625(Akap8l),ENSMUSG00000002661(Alkbh7),ENSMUSG00000003346(Abhd17a),ENSMUSG00000003378(Grik5),ENSMUSG0000…
BP	GO:0002697	regulation of immune effector process	123	36	159	385	1.04253e-17	6.85402e-16	ENSMUSG00000000791(Il12rb1),ENSMUSG00000001123(Lgals9),ENSMUSG00000004043(Stat5a),ENSMUSG00000004266(Ptpn6),ENSMUSG00000004296(Il12b),ENSMUSG00000004709(Cd244a),ENSMUSG00000005413(Hmox1),ENSMUSG00000006205(Htra1),ENSMUSG00000015316(Slamf1),ENSMUSG00000015947(Fcgr1),ENSMUSG00000016206(H2-M3),ENSMUSG00000016529(Il10),ENSMUSG00000017631(Abr),ENSMUSG00000017652(Cd40),ENSMUSG00000017776(Crk),ENSMUSG00…	ENSMUSG00000000631(Myo18a),ENSMUSG00000000869(Il4),ENSMUSG00000003882(Il7r),ENSMUSG00000005102(Eif2ak4),ENSMUSG00000016493(Cd46),ENSMUSG00000017550(Atad5),ENSMUSG00000018752(Tnfsfm13),ENSMUSG00000020263(Appl2),ENSMUSG00000020399(Havcr2),ENSMUSG00000020823(Sec14l1),ENSMUSG00000021253(Tgfb3),ENSMUSG00000022672(Prkdc),ENSMUSG00000024151(Msh2),ENSMUSG00000025880(Smad7),ENSMUSG00000026012(Cd28),ENSMUS…
BP	GO:0022603	regulation of anatomical structure morphogenesis	215	138	353	1067	1.08752e-17	7.12128e-16	ENSMUSG00000000555(Itga5),ENSMUSG00000000600(Krit1),ENSMUSG00000000628(Hk2),ENSMUSG00000000982(Ccl3),ENSMUSG00000001052(Sec24b),ENSMUSG00000001300(Efnb2),ENSMUSG00000001627(Ifrd1),ENSMUSG00000001768(Rin2),ENSMUSG00000002227(Mov10),ENSMUSG00000002233(Rhoc),ENSMUSG00000002413(Braf),ENSMUSG00000003283(Hck),ENSMUSG00000004040(Stat3),ENSMUSG00000004296(Il12b),ENSMUSG00000004771(Rab11a),ENSMUSG00000004…	ENSMUSG00000000149(Gna12),ENSMUSG00000000440(Pparg),ENSMUSG00000000869(Il4),ENSMUSG00000001036(Epn2),ENSMUSG00000001227(Sema6b),ENSMUSG00000001761(Smo),ENSMUSG00000002274(Metrn),ENSMUSG00000004462(Tbccd1),ENSMUSG00000004530(Coro1c),ENSMUSG00000004798(Ulk2),ENSMUSG00000005514(Por),ENSMUSG00000005583(Mef2c),ENSMUSG00000005958(Ephb3),ENSMUSG00000006219(Fblim1),ENSMUSG00000006800(Sulf2),ENSMUSG000000…
BP	GO:0045935	positive regulation of nucleobase-containing compound metabolic process	307	260	567	1886	1.13019e-17	7.37135e-16	ENSMUSG00000000078(Klf6),ENSMUSG00000000247(Lhx2),ENSMUSG00000000275(Trim25),ENSMUSG00000000532(Acvr1b),ENSMUSG00000000568(Hnrnpd),ENSMUSG00000000708(Kat2b),ENSMUSG00000000730(Dnmt3l),ENSMUSG00000000982(Ccl3),ENSMUSG00000001288(Rarg),ENSMUSG00000001416(Cct3),ENSMUSG00000001542(Ell2),ENSMUSG00000001627(Ifrd1),ENSMUSG00000001632(Brpf1),ENSMUSG00000001785(Pwp1),ENSMUSG00000002111(Spi1),ENSMUSG000000…	ENSMUSG00000000440(Pparg),ENSMUSG00000000869(Il4),ENSMUSG00000001419(Mef2d),ENSMUSG00000001761(Smo),ENSMUSG00000002409(Dyrk1b),ENSMUSG00000002617(Zfp40),ENSMUSG00000002625(Akap8l),ENSMUSG00000002968(Med25),ENSMUSG00000003190(Bcl2l12),ENSMUSG00000003282(Plag1),ENSMUSG00000003575(Crtc1),ENSMUSG00000003992(Ssbp2),ENSMUSG00000004151(Etv1),ENSMUSG00000005198(Polr2a),ENSMUSG00000005534(Insr),ENSMUSG000…
BP	GO:0007249	I-kappaB kinase/NF-kappaB signaling	87	21	108	227	1.33386e-17	8.66536e-16	ENSMUSG00000000275(Trim25),ENSMUSG00000002983(Relb),ENSMUSG00000004221(Ikbkg),ENSMUSG00000015755(Tab2),ENSMUSG00000015837(Sqstm1),ENSMUSG00000017652(Cd40),ENSMUSG00000018899(Irf1),ENSMUSG00000019842(Traf3ip2),ENSMUSG00000019850(Tnfaip3),ENSMUSG00000020075(Ddx21),ENSMUSG00000020115(Tbk1),ENSMUSG00000020134(Peli1),ENSMUSG00000020275(Rel),ENSMUSG00000020400(Tnip1),ENSMUSG00000020580(Rock2),ENSMUSG00…	ENSMUSG00000008305(Tle1),ENSMUSG00000020889(Nr1d1),ENSMUSG00000022178(Ajuba),ENSMUSG00000023826(Prkn),ENSMUSG00000025507(Pidd1),ENSMUSG00000025736(Jmjd8),ENSMUSG00000026228(Htr2b),ENSMUSG00000026842(Abl1),ENSMUSG00000028756(Pink1),ENSMUSG00000029204(Rhoh),ENSMUSG00000031077(Fadd),ENSMUSG00000032109(Nlrx1),ENSMUSG00000032238(Rora),ENSMUSG00000032251(Irak1bp1),ENSMUSG00000033430(Terf2ip),ENSMUSG000…
BP	GO:0040012	regulation of locomotion	209	129	338	1013	1.37444e-17	8.89382e-16	ENSMUSG00000000532(Acvr1b),ENSMUSG00000000555(Itga5),ENSMUSG00000000600(Krit1),ENSMUSG00000000957(Mmp14),ENSMUSG00000000982(Ccl3),ENSMUSG00000001123(Lgals9),ENSMUSG00000001300(Efnb2),ENSMUSG00000001435(Col18a1),ENSMUSG00000001768(Rin2),ENSMUSG00000001786(Fbxo7),ENSMUSG00000002233(Rhoc),ENSMUSG00000002413(Braf),ENSMUSG00000003665(Has1),ENSMUSG00000004040(Stat3),ENSMUSG00000004043(Stat5a),ENSMUSG00…	ENSMUSG00000000149(Gna12),ENSMUSG00000000440(Pparg),ENSMUSG00000000869(Il4),ENSMUSG00000001227(Sema6b),ENSMUSG00000001741(Il16),ENSMUSG00000001761(Smo),ENSMUSG00000003518(Dusp3),ENSMUSG00000004462(Tbccd1),ENSMUSG00000004530(Coro1c),ENSMUSG00000005534(Insr),ENSMUSG00000005583(Mef2c),ENSMUSG00000006464(Bbs1),ENSMUSG00000007613(Tgfbr1),ENSMUSG00000008855(Hdac5),ENSMUSG00000010047(Hyal2),ENSMUSG00000…
BP	GO:0006357	regulation of transcription by RNA polymerase II	330	375	705	2439	1.89933e-17	1.22421e-15	ENSMUSG00000000078(Klf6),ENSMUSG00000000247(Lhx2),ENSMUSG00000000532(Acvr1b),ENSMUSG00000000568(Hnrnpd),ENSMUSG00000000708(Kat2b),ENSMUSG00000000982(Ccl3),ENSMUSG00000001156(Mxd1),ENSMUSG00000001288(Rarg),ENSMUSG00000001542(Ell2),ENSMUSG00000001627(Ifrd1),ENSMUSG00000002111(Spi1),ENSMUSG00000002325(Irf9),ENSMUSG00000002578(Ikzf4),ENSMUSG00000002658(Gtf2f1),ENSMUSG00000002983(Relb),ENSMUSG00000003…	ENSMUSG00000000282(Mnt),ENSMUSG00000000440(Pparg),ENSMUSG00000000869(Il4),ENSMUSG00000001120(Pcbp3),ENSMUSG00000001228(Uhrf1),ENSMUSG00000001419(Mef2d),ENSMUSG00000001761(Smo),ENSMUSG00000002617(Zfp40),ENSMUSG00000002625(Akap8l),ENSMUSG00000002968(Med25),ENSMUSG00000003190(Bcl2l12),ENSMUSG00000003282(Plag1),ENSMUSG00000003575(Crtc1),ENSMUSG00000003992(Ssbp2),ENSMUSG00000004099(Dnmt1),ENSMUSG00000…
BP	GO:0097190	apoptotic signaling pathway	133	86	219	589	2.07592e-17	1.3328e-15	ENSMUSG00000000001(Gnai3),ENSMUSG00000000409(Lck),ENSMUSG00000000532(Acvr1b),ENSMUSG00000000915(Hip1r),ENSMUSG00000001707(Eef1e1),ENSMUSG00000002797(Ggct),ENSMUSG00000004221(Ikbkg),ENSMUSG00000004446(Bid),ENSMUSG00000004936(Map2k1),ENSMUSG00000005087(Cd44),ENSMUSG00000005312(Ubqln1),ENSMUSG00000005413(Hmox1),ENSMUSG00000006818(Sod2),ENSMUSG00000007655(Cav1),ENSMUSG00000015839(Nfe2l2),ENSMUSG00000…	ENSMUSG00000000282(Mnt),ENSMUSG00000000869(Il4),ENSMUSG00000002083(Bbc3),ENSMUSG00000002731(Prkra),ENSMUSG00000003190(Bcl2l12),ENSMUSG00000004071(Cdip1),ENSMUSG00000005370(Msh6),ENSMUSG00000005718(Tfap4),ENSMUSG00000007613(Tgfbr1),ENSMUSG00000010047(Hyal2),ENSMUSG00000010461(Eya4),ENSMUSG00000010751(Tnfrsf22),ENSMUSG00000017146(Brca1),ENSMUSG00000017550(Atad5),ENSMUSG00000018537(Pcgf2),ENSMUSG000…
BP	GO:1902533	positive regulation of intracellular signal transduction	226	99	325	968	2.20362e-17	1.40929e-15	ENSMUSG00000000275(Trim25),ENSMUSG00000000409(Lck),ENSMUSG00000000982(Ccl3),ENSMUSG00000001175(Calm1),ENSMUSG00000001707(Eef1e1),ENSMUSG00000002413(Braf),ENSMUSG00000002602(Axl),ENSMUSG00000004085(Map3k20),ENSMUSG00000004221(Ikbkg),ENSMUSG00000004266(Ptpn6),ENSMUSG00000004446(Bid),ENSMUSG00000004936(Map2k1),ENSMUSG00000005087(Cd44),ENSMUSG00000006134(Crkl),ENSMUSG00000007655(Cav1),ENSMUSG00000009…	ENSMUSG00000002083(Bbc3),ENSMUSG00000002731(Prkra),ENSMUSG00000005045(Chd5),ENSMUSG00000005534(Insr),ENSMUSG00000005583(Mef2c),ENSMUSG00000006235(Epor),ENSMUSG00000006575(Rundc3a),ENSMUSG00000007613(Tgfbr1),ENSMUSG00000014158(Trpv4),ENSMUSG00000014426(Map3k4),ENSMUSG00000017466(Timp2),ENSMUSG00000017697(Ada),ENSMUSG00000018669(Cdk5rap3),ENSMUSG00000018849(Wwc1),ENSMUSG00000018909(Arrb1),ENSMUSG00…
BP	GO:0007275	multicellular organism development	762	646	1408	5373	2.41704e-17	1.53979e-15	ENSMUSG00000000001(Gnai3),ENSMUSG00000000247(Lhx2),ENSMUSG00000000248(Clec2g),ENSMUSG00000000409(Lck),ENSMUSG00000000532(Acvr1b),ENSMUSG00000000555(Itga5),ENSMUSG00000000568(Hnrnpd),ENSMUSG00000000600(Krit1),ENSMUSG00000000628(Hk2),ENSMUSG00000000708(Kat2b),ENSMUSG00000000730(Dnmt3l),ENSMUSG00000000732(Icosl),ENSMUSG00000000838(Fmr1),ENSMUSG00000000915(Hip1r),ENSMUSG00000000957(Mmp14),ENSMUSG0000…	ENSMUSG00000000149(Gna12),ENSMUSG00000000440(Pparg),ENSMUSG00000000751(Rpa1),ENSMUSG00000000869(Il4),ENSMUSG00000001036(Epn2),ENSMUSG00000001053(N4bp3),ENSMUSG00000001227(Sema6b),ENSMUSG00000001419(Mef2d),ENSMUSG00000001751(Naglu),ENSMUSG00000001761(Smo),ENSMUSG00000001827(Folr1),ENSMUSG00000002083(Bbc3),ENSMUSG00000002274(Metrn),ENSMUSG00000002289(Angptl4),ENSMUSG00000002409(Dyrk1b),ENSMUSG00000…
BP	GO:0022407	regulation of cell-cell adhesion	119	47	166	411	2.5495e-17	1.6179e-15	ENSMUSG00000000409(Lck),ENSMUSG00000000732(Icosl),ENSMUSG00000000791(Il12rb1),ENSMUSG00000001123(Lgals9),ENSMUSG00000001300(Efnb2),ENSMUSG00000004043(Stat5a),ENSMUSG00000004266(Ptpn6),ENSMUSG00000004296(Il12b),ENSMUSG00000004709(Cd244a),ENSMUSG00000004936(Map2k1),ENSMUSG00000005087(Cd44),ENSMUSG00000007655(Cav1),ENSMUSG00000015316(Slamf1),ENSMUSG00000015396(Cd83),ENSMUSG00000016206(H2-M3),ENSMUSG…	ENSMUSG00000000869(Il4),ENSMUSG00000003518(Dusp3),ENSMUSG00000003882(Il7r),ENSMUSG00000005958(Ephb3),ENSMUSG00000013707(Tnfaip8l2),ENSMUSG00000014158(Trpv4),ENSMUSG00000016493(Cd46),ENSMUSG00000017697(Ada),ENSMUSG00000020399(Havcr2),ENSMUSG00000021756(Il6st),ENSMUSG00000022367(Has2),ENSMUSG00000023915(Tnfrsf21),ENSMUSG00000024978(Gpam),ENSMUSG00000025880(Smad7),ENSMUSG00000026012(Cd28),ENSMUSG000…
BP	GO:0071219	cellular response to molecule of bacterial origin	90	17	107	226	2.92538e-17	1.84929e-15	ENSMUSG00000000982(Ccl3),ENSMUSG00000002602(Axl),ENSMUSG00000004296(Il12b),ENSMUSG00000015305(Sash1),ENSMUSG00000016496(Cd274),ENSMUSG00000016529(Il10),ENSMUSG00000017652(Cd40),ENSMUSG00000018920(Cxcl16),ENSMUSG00000019850(Tnfaip3),ENSMUSG00000020638(Cmpk2),ENSMUSG00000020826(Nos2),ENSMUSG00000021025(Nfkbia),ENSMUSG00000021423(Ly86),ENSMUSG00000021936(Mapk8),ENSMUSG00000022122(Ednrb),ENSMUSG00000…	ENSMUSG00000005583(Mef2c),ENSMUSG00000005951(Shpk),ENSMUSG00000006728(Cdk4),ENSMUSG00000008855(Hdac5),ENSMUSG00000020399(Havcr2),ENSMUSG00000020889(Nr1d1),ENSMUSG00000021699(Pde4d),ENSMUSG00000024975(Pdcd4),ENSMUSG00000025586(Cpeb1),ENSMUSG00000026842(Abl1),ENSMUSG00000027843(Ptpn22),ENSMUSG00000032377(Plscr4),ENSMUSG00000037936(Scarb1),ENSMUSG00000038481(Cdk19),ENSMUSG00000052336(Cx3cr1),ENSMUSG…
BP	GO:0022607	cellular component assembly	385	382	767	2694	3.05483e-17	1.92048e-15	ENSMUSG00000000555(Itga5),ENSMUSG00000000708(Kat2b),ENSMUSG00000000915(Hip1r),ENSMUSG00000000957(Mmp14),ENSMUSG00000001098(Kctd10),ENSMUSG00000001300(Efnb2),ENSMUSG00000001416(Cct3),ENSMUSG00000001440(Kpnb1),ENSMUSG00000001763(Tspan33),ENSMUSG00000002233(Rhoc),ENSMUSG00000002307(Daxx),ENSMUSG00000002413(Braf),ENSMUSG00000002477(Snrpd1),ENSMUSG00000002578(Ikzf4),ENSMUSG00000002812(Flii),ENSMUSG000…	ENSMUSG00000000028(Cdc45),ENSMUSG00000001482(Def8),ENSMUSG00000002031(Ift46),ENSMUSG00000002055(Spag5),ENSMUSG00000002083(Bbc3),ENSMUSG00000002486(Tchp),ENSMUSG00000002835(Chaf1a),ENSMUSG00000002870(Mcm2),ENSMUSG00000002968(Med25),ENSMUSG00000003452(Bicd1),ENSMUSG00000003518(Dusp3),ENSMUSG00000003575(Crtc1),ENSMUSG00000004099(Dnmt1),ENSMUSG00000004530(Coro1c),ENSMUSG00000004567(Mcoln1),ENSMUSG000…
BP	GO:0030334	regulation of cell migration	195	115	310	915	3.06137e-17	1.92048e-15	ENSMUSG00000000532(Acvr1b),ENSMUSG00000000555(Itga5),ENSMUSG00000000600(Krit1),ENSMUSG00000000957(Mmp14),ENSMUSG00000000982(Ccl3),ENSMUSG00000001123(Lgals9),ENSMUSG00000001435(Col18a1),ENSMUSG00000001768(Rin2),ENSMUSG00000002233(Rhoc),ENSMUSG00000002413(Braf),ENSMUSG00000003665(Has1),ENSMUSG00000004040(Stat3),ENSMUSG00000004043(Stat5a),ENSMUSG00000004771(Rab11a),ENSMUSG00000004936(Map2k1),ENSMUSG…	ENSMUSG00000000149(Gna12),ENSMUSG00000000440(Pparg),ENSMUSG00000000869(Il4),ENSMUSG00000001227(Sema6b),ENSMUSG00000001761(Smo),ENSMUSG00000003518(Dusp3),ENSMUSG00000004462(Tbccd1),ENSMUSG00000004530(Coro1c),ENSMUSG00000005534(Insr),ENSMUSG00000005583(Mef2c),ENSMUSG00000007613(Tgfbr1),ENSMUSG00000008855(Hdac5),ENSMUSG00000010047(Hyal2),ENSMUSG00000010051(Hyal1),ENSMUSG00000014158(Trpv4),ENSMUSG000…
BP	GO:0006974	cellular response to DNA damage stimulus	100	165	265	753	3.37483e-17	2.10907e-15	ENSMUSG00000001707(Eef1e1),ENSMUSG00000003208(Yju2),ENSMUSG00000003541(Ier3),ENSMUSG00000004085(Map3k20),ENSMUSG00000004221(Ikbkg),ENSMUSG00000004446(Bid),ENSMUSG00000005087(Cd44),ENSMUSG00000005413(Hmox1),ENSMUSG00000006818(Sod2),ENSMUSG00000016528(Mapkapk2),ENSMUSG00000017291(Taok1),ENSMUSG00000020038(Cry1),ENSMUSG00000020122(Egfr),ENSMUSG00000020152(Actr2),ENSMUSG00000020184(Mdm2),ENSMUSG00000…	ENSMUSG00000000028(Cdc45),ENSMUSG00000000751(Rpa1),ENSMUSG00000001228(Uhrf1),ENSMUSG00000002083(Bbc3),ENSMUSG00000002109(Ddb2),ENSMUSG00000002661(Alkbh7),ENSMUSG00000002835(Chaf1a),ENSMUSG00000002870(Mcm2),ENSMUSG00000003190(Bcl2l12),ENSMUSG00000004071(Cdip1),ENSMUSG00000005102(Eif2ak4),ENSMUSG00000005370(Msh6),ENSMUSG00000005718(Tfap4),ENSMUSG00000006288(Ttc5),ENSMUSG00000006678(Pola1),ENSMUSG00…
BP	GO:0042110	T cell activation	129	61	190	493	4.2907e-17	2.67129e-15	ENSMUSG00000000409(Lck),ENSMUSG00000000732(Icosl),ENSMUSG00000000791(Il12rb1),ENSMUSG00000001123(Lgals9),ENSMUSG00000001300(Efnb2),ENSMUSG00000002413(Braf),ENSMUSG00000002983(Relb),ENSMUSG00000003206(Ebi3),ENSMUSG00000004040(Stat3),ENSMUSG00000004043(Stat5a),ENSMUSG00000004266(Ptpn6),ENSMUSG00000004296(Il12b),ENSMUSG00000004709(Cd244a),ENSMUSG00000005087(Cd44),ENSMUSG00000006310(Zbtb32),ENSMUSG00…	ENSMUSG00000000869(Il4),ENSMUSG00000003518(Dusp3),ENSMUSG00000003882(Il7r),ENSMUSG00000005102(Eif2ak4),ENSMUSG00000013707(Tnfaip8l2),ENSMUSG00000016493(Cd46),ENSMUSG00000017697(Ada),ENSMUSG00000020167(Tcf3),ENSMUSG00000020399(Havcr2),ENSMUSG00000020453(Patz1),ENSMUSG00000020605(Hs1bp3),ENSMUSG00000021127(Zfp36l1),ENSMUSG00000021356(Irf4),ENSMUSG00000021756(Il6st),ENSMUSG00000022672(Prkdc),ENSMUSG…
BP	GO:0051336	regulation of hydrolase activity	245	148	393	1226	4.62385e-17	2.86783e-15	ENSMUSG00000000409(Lck),ENSMUSG00000000915(Hip1r),ENSMUSG00000000982(Ccl3),ENSMUSG00000000983(Wfdc18),ENSMUSG00000001166(Oas1c),ENSMUSG00000001168(Oas1h),ENSMUSG00000001175(Calm1),ENSMUSG00000001768(Rin2),ENSMUSG00000002233(Rhoc),ENSMUSG00000003226(Ranbp2),ENSMUSG00000004040(Stat3),ENSMUSG00000004446(Bid),ENSMUSG00000004936(Map2k1),ENSMUSG00000004952(Rasa4),ENSMUSG00000005087(Cd44),ENSMUSG0000000…	ENSMUSG00000000440(Pparg),ENSMUSG00000001995(Sipa1l2),ENSMUSG00000002083(Bbc3),ENSMUSG00000002289(Angptl4),ENSMUSG00000002870(Mcm2),ENSMUSG00000003134(Tbc1d8),ENSMUSG00000003190(Bcl2l12),ENSMUSG00000003452(Bicd1),ENSMUSG00000004530(Coro1c),ENSMUSG00000004633(Chn2),ENSMUSG00000005370(Msh6),ENSMUSG00000005514(Por),ENSMUSG00000005583(Mef2c),ENSMUSG00000005718(Tfap4),ENSMUSG00000005958(Ephb3),ENSMUSG…
MF	GO:0043169	cation binding	506	606	1112	4126	5.01707e-17	3.09498e-15	ENSMUSG00000000001(Gnai3),ENSMUSG00000000247(Lhx2),ENSMUSG00000000275(Trim25),ENSMUSG00000000532(Acvr1b),ENSMUSG00000000555(Itga5),ENSMUSG00000000730(Dnmt3l),ENSMUSG00000000957(Mmp14),ENSMUSG00000001052(Sec24b),ENSMUSG00000001175(Calm1),ENSMUSG00000001288(Rarg),ENSMUSG00000001348(Acp5),ENSMUSG00000001435(Col18a1),ENSMUSG00000001441(Npepps),ENSMUSG00000001467(Cyp51),ENSMUSG00000001630(Stk38l),ENSM…	ENSMUSG00000000149(Gna12),ENSMUSG00000000253(Gmpr),ENSMUSG00000000326(Comt),ENSMUSG00000000440(Pparg),ENSMUSG00000000673(Haao),ENSMUSG00000000751(Rpa1),ENSMUSG00000001054(Rmnd5b),ENSMUSG00000001143(Lman2l),ENSMUSG00000001228(Uhrf1),ENSMUSG00000001482(Def8),ENSMUSG00000001865(Cpa3),ENSMUSG00000002308(Cd320),ENSMUSG00000002329(Mdp1),ENSMUSG00000002617(Zfp40),ENSMUSG00000002661(Alkbh7),ENSMUSG000000…
BP	GO:0002683	negative regulation of immune system process	128	52	180	460	5.02773e-17	3.09498e-15	ENSMUSG00000000248(Clec2g),ENSMUSG00000000982(Ccl3),ENSMUSG00000001123(Lgals9),ENSMUSG00000001786(Fbxo7),ENSMUSG00000002602(Axl),ENSMUSG00000004043(Stat5a),ENSMUSG00000004266(Ptpn6),ENSMUSG00000004296(Il12b),ENSMUSG00000005413(Hmox1),ENSMUSG00000005779(Psmb4),ENSMUSG00000006205(Htra1),ENSMUSG00000008976(Gabpa),ENSMUSG00000014773(Dll1),ENSMUSG00000015316(Slamf1),ENSMUSG00000015839(Nfe2l2),ENSMUSG0…	ENSMUSG00000000440(Pparg),ENSMUSG00000000869(Il4),ENSMUSG00000003518(Dusp3),ENSMUSG00000003882(Il7r),ENSMUSG00000013707(Tnfaip8l2),ENSMUSG00000017697(Ada),ENSMUSG00000020167(Tcf3),ENSMUSG00000020399(Havcr2),ENSMUSG00000020823(Sec14l1),ENSMUSG00000020889(Nr1d1),ENSMUSG00000021127(Zfp36l1),ENSMUSG00000021253(Tgfb3),ENSMUSG00000022667(Cd200r1),ENSMUSG00000022672(Prkdc),ENSMUSG00000023915(Tnfrsf21),E…
BP	GO:0035458	cellular response to interferon-beta	36	1	37	46	5.87618e-17	3.60377e-15	ENSMUSG00000018899(Irf1),ENSMUSG00000020464(Pnpt1),ENSMUSG00000026535(Ifi202b),ENSMUSG00000026536(Ifi211),ENSMUSG00000028268(Gbp3),ENSMUSG00000028270(Gbp2),ENSMUSG00000031639(Tlr3),ENSMUSG00000034459(Ifit1),ENSMUSG00000037849(Ifi206),ENSMUSG00000037860(Aim2),ENSMUSG00000039997(Ifi203),ENSMUSG00000043263(Ifi209),ENSMUSG00000046879(Irgm1),ENSMUSG00000048806(Ifnb1),ENSMUSG00000048852(Gm12185),ENSMUS…	ENSMUSG00000068329(Htra2)
BP	GO:0022409	positive regulation of cell-cell adhesion	83	32	115	252	6.15556e-17	3.76107e-15	ENSMUSG00000000409(Lck),ENSMUSG00000000732(Icosl),ENSMUSG00000000791(Il12rb1),ENSMUSG00000001123(Lgals9),ENSMUSG00000001300(Efnb2),ENSMUSG00000004043(Stat5a),ENSMUSG00000004296(Il12b),ENSMUSG00000004709(Cd244a),ENSMUSG00000005087(Cd44),ENSMUSG00000007655(Cav1),ENSMUSG00000015316(Slamf1),ENSMUSG00000015396(Cd83),ENSMUSG00000016206(H2-M3),ENSMUSG00000016496(Cd274),ENSMUSG00000018899(Irf1),ENSMUSG00…	ENSMUSG00000000869(Il4),ENSMUSG00000003882(Il7r),ENSMUSG00000016493(Cd46),ENSMUSG00000017697(Ada),ENSMUSG00000020399(Havcr2),ENSMUSG00000021756(Il6st),ENSMUSG00000022367(Has2),ENSMUSG00000024978(Gpam),ENSMUSG00000025880(Smad7),ENSMUSG00000026012(Cd28),ENSMUSG00000026117(Zap70),ENSMUSG00000026585(Kifap3),ENSMUSG00000027111(Itga6),ENSMUSG00000027239(Mdk),ENSMUSG00000027843(Ptpn22),ENSMUSG0000002920…
BP	GO:0042327	positive regulation of phosphorylation	227	127	354	1082	6.53341e-17	3.97715e-15	ENSMUSG00000000184(Ccnd2),ENSMUSG00000000409(Lck),ENSMUSG00000000532(Acvr1b),ENSMUSG00000000555(Itga5),ENSMUSG00000000982(Ccl3),ENSMUSG00000001123(Lgals9),ENSMUSG00000002307(Daxx),ENSMUSG00000002413(Braf),ENSMUSG00000002602(Axl),ENSMUSG00000002699(Lcp2),ENSMUSG00000003226(Ranbp2),ENSMUSG00000003948(Mmd),ENSMUSG00000004085(Map3k20),ENSMUSG00000004221(Ikbkg),ENSMUSG00000004296(Il12b),ENSMUSG0000000…	ENSMUSG00000000869(Il4),ENSMUSG00000005102(Eif2ak4),ENSMUSG00000005534(Insr),ENSMUSG00000005583(Mef2c),ENSMUSG00000005958(Ephb3),ENSMUSG00000006235(Epor),ENSMUSG00000006435(Neurl1a),ENSMUSG00000007613(Tgfbr1),ENSMUSG00000009621(Vav2),ENSMUSG00000013483(Card14),ENSMUSG00000014158(Trpv4),ENSMUSG00000014426(Map3k4),ENSMUSG00000016349(Eef1a2),ENSMUSG00000016984(Etaa1),ENSMUSG00000017466(Timp2),ENSMUS…
BP	GO:0006366	transcription by RNA polymerase II	337	380	717	2500	7.01962e-17	4.25736e-15	ENSMUSG00000000078(Klf6),ENSMUSG00000000247(Lhx2),ENSMUSG00000000532(Acvr1b),ENSMUSG00000000568(Hnrnpd),ENSMUSG00000000708(Kat2b),ENSMUSG00000000982(Ccl3),ENSMUSG00000001156(Mxd1),ENSMUSG00000001288(Rarg),ENSMUSG00000001542(Ell2),ENSMUSG00000001627(Ifrd1),ENSMUSG00000002111(Spi1),ENSMUSG00000002325(Irf9),ENSMUSG00000002578(Ikzf4),ENSMUSG00000002658(Gtf2f1),ENSMUSG00000002983(Relb),ENSMUSG00000003…	ENSMUSG00000000282(Mnt),ENSMUSG00000000440(Pparg),ENSMUSG00000000869(Il4),ENSMUSG00000001120(Pcbp3),ENSMUSG00000001228(Uhrf1),ENSMUSG00000001419(Mef2d),ENSMUSG00000001761(Smo),ENSMUSG00000002617(Zfp40),ENSMUSG00000002625(Akap8l),ENSMUSG00000002968(Med25),ENSMUSG00000003190(Bcl2l12),ENSMUSG00000003282(Plag1),ENSMUSG00000003575(Crtc1),ENSMUSG00000003992(Ssbp2),ENSMUSG00000004099(Dnmt1),ENSMUSG00000…
BP	GO:0044085	cellular component biogenesis	417	405	822	2928	8.01043e-17	4.84042e-15	ENSMUSG00000000555(Itga5),ENSMUSG00000000708(Kat2b),ENSMUSG00000000915(Hip1r),ENSMUSG00000000957(Mmp14),ENSMUSG00000001098(Kctd10),ENSMUSG00000001300(Efnb2),ENSMUSG00000001416(Cct3),ENSMUSG00000001440(Kpnb1),ENSMUSG00000001763(Tspan33),ENSMUSG00000001785(Pwp1),ENSMUSG00000002233(Rhoc),ENSMUSG00000002307(Daxx),ENSMUSG00000002413(Braf),ENSMUSG00000002477(Snrpd1),ENSMUSG00000002578(Ikzf4),ENSMUSG000…	ENSMUSG00000000028(Cdc45),ENSMUSG00000001482(Def8),ENSMUSG00000002031(Ift46),ENSMUSG00000002055(Spag5),ENSMUSG00000002083(Bbc3),ENSMUSG00000002486(Tchp),ENSMUSG00000002835(Chaf1a),ENSMUSG00000002870(Mcm2),ENSMUSG00000002968(Med25),ENSMUSG00000003452(Bicd1),ENSMUSG00000003518(Dusp3),ENSMUSG00000003575(Crtc1),ENSMUSG00000004099(Dnmt1),ENSMUSG00000004530(Coro1c),ENSMUSG00000004561(Mettl17),ENSMUSG00…
BP	GO:0002460	adaptive immune response based on somatic recombination of immune receptors built from immunoglobulin superfamily domains	83	34	117	259	8.51733e-17	5.12787e-15	ENSMUSG00000000732(Icosl),ENSMUSG00000000791(Il12rb1),ENSMUSG00000002983(Relb),ENSMUSG00000004040(Stat3),ENSMUSG00000004266(Ptpn6),ENSMUSG00000004296(Il12b),ENSMUSG00000015316(Slamf1),ENSMUSG00000015437(Gzmb),ENSMUSG00000015947(Fcgr1),ENSMUSG00000016206(H2-M3),ENSMUSG00000016496(Cd274),ENSMUSG00000017652(Cd40),ENSMUSG00000018899(Irf1),ENSMUSG00000019850(Tnfaip3),ENSMUSG00000020437(Myo1g),ENSMUSG0…	ENSMUSG00000000869(Il4),ENSMUSG00000003882(Il7r),ENSMUSG00000005370(Msh6),ENSMUSG00000005583(Mef2c),ENSMUSG00000016493(Cd46),ENSMUSG00000017550(Atad5),ENSMUSG00000017697(Ada),ENSMUSG00000018752(Tnfsfm13),ENSMUSG00000020399(Havcr2),ENSMUSG00000021356(Irf4),ENSMUSG00000024151(Msh2),ENSMUSG00000025880(Smad7),ENSMUSG00000026012(Cd28),ENSMUSG00000026288(Inpp5d),ENSMUSG00000026471(Mr1),ENSMUSG000000279…
BP	GO:1903708	positive regulation of hemopoiesis	71	30	101	211	8.86095e-17	5.31528e-15	ENSMUSG00000000409(Lck),ENSMUSG00000000532(Acvr1b),ENSMUSG00000000957(Mmp14),ENSMUSG00000000982(Ccl3),ENSMUSG00000001123(Lgals9),ENSMUSG00000002602(Axl),ENSMUSG00000004040(Stat3),ENSMUSG00000004043(Stat5a),ENSMUSG00000004296(Il12b),ENSMUSG00000014599(Csf1),ENSMUSG00000015396(Cd83),ENSMUSG00000016206(H2-M3),ENSMUSG00000016529(Il10),ENSMUSG00000018160(Med1),ENSMUSG00000018899(Irf1),ENSMUSG000000199…	ENSMUSG00000000869(Il4),ENSMUSG00000003882(Il7r),ENSMUSG00000016493(Cd46),ENSMUSG00000017697(Ada),ENSMUSG00000020689(Itgb3),ENSMUSG00000021127(Zfp36l1),ENSMUSG00000021250(Fos),ENSMUSG00000022105(Rb1),ENSMUSG00000022672(Prkdc),ENSMUSG00000026117(Zap70),ENSMUSG00000026288(Inpp5d),ENSMUSG00000027239(Mdk),ENSMUSG00000028669(Pithd1),ENSMUSG00000028717(Tal1),ENSMUSG00000028988(Ctnnbip1),ENSMUSG00000029…
BP	GO:0051234	establishment of localization	620	576	1196	4488	9.57745e-17	5.72418e-15	ENSMUSG00000000001(Gnai3),ENSMUSG00000000385(Tmprss2),ENSMUSG00000000409(Lck),ENSMUSG00000000628(Hk2),ENSMUSG00000000915(Hip1r),ENSMUSG00000000982(Ccl3),ENSMUSG00000001052(Sec24b),ENSMUSG00000001123(Lgals9),ENSMUSG00000001175(Calm1),ENSMUSG00000001248(Gramd1a),ENSMUSG00000001300(Efnb2),ENSMUSG00000001416(Cct3),ENSMUSG00000001440(Kpnb1),ENSMUSG00000001467(Cyp51),ENSMUSG00000001768(Rin2),ENSMUSG000…	ENSMUSG00000000326(Comt),ENSMUSG00000000440(Pparg),ENSMUSG00000000631(Myo18a),ENSMUSG00000000869(Il4),ENSMUSG00000001036(Epn2),ENSMUSG00000001138(Cnnm3),ENSMUSG00000001143(Lman2l),ENSMUSG00000001436(Slc19a1),ENSMUSG00000001741(Il16),ENSMUSG00000001761(Smo),ENSMUSG00000001827(Folr1),ENSMUSG00000002031(Ift46),ENSMUSG00000002055(Spag5),ENSMUSG00000002083(Bbc3),ENSMUSG00000002308(Cd320),ENSMUSG000000…
BP	GO:2000145	regulation of cell motility	199	123	322	966	9.94884e-17	5.92461e-15	ENSMUSG00000000532(Acvr1b),ENSMUSG00000000555(Itga5),ENSMUSG00000000600(Krit1),ENSMUSG00000000957(Mmp14),ENSMUSG00000000982(Ccl3),ENSMUSG00000001123(Lgals9),ENSMUSG00000001435(Col18a1),ENSMUSG00000001768(Rin2),ENSMUSG00000002233(Rhoc),ENSMUSG00000002413(Braf),ENSMUSG00000003665(Has1),ENSMUSG00000004040(Stat3),ENSMUSG00000004043(Stat5a),ENSMUSG00000004044(Cavin1),ENSMUSG00000004591(Pkn2),ENSMUSG00…	ENSMUSG00000000149(Gna12),ENSMUSG00000000440(Pparg),ENSMUSG00000000869(Il4),ENSMUSG00000001227(Sema6b),ENSMUSG00000001761(Smo),ENSMUSG00000003518(Dusp3),ENSMUSG00000004462(Tbccd1),ENSMUSG00000004530(Coro1c),ENSMUSG00000005534(Insr),ENSMUSG00000005583(Mef2c),ENSMUSG00000006464(Bbs1),ENSMUSG00000007613(Tgfbr1),ENSMUSG00000008855(Hdac5),ENSMUSG00000010047(Hyal2),ENSMUSG00000010051(Hyal1),ENSMUSG0000…
BP	GO:0010562	positive regulation of phosphorus metabolic process	242	131	373	1156	1.01603e-16	6.00701e-15	ENSMUSG00000000184(Ccnd2),ENSMUSG00000000409(Lck),ENSMUSG00000000532(Acvr1b),ENSMUSG00000000555(Itga5),ENSMUSG00000000982(Ccl3),ENSMUSG00000001123(Lgals9),ENSMUSG00000001175(Calm1),ENSMUSG00000002307(Daxx),ENSMUSG00000002413(Braf),ENSMUSG00000002602(Axl),ENSMUSG00000002699(Lcp2),ENSMUSG00000003226(Ranbp2),ENSMUSG00000003948(Mmd),ENSMUSG00000004040(Stat3),ENSMUSG00000004085(Map3k20),ENSMUSG0000000…	ENSMUSG00000000869(Il4),ENSMUSG00000005102(Eif2ak4),ENSMUSG00000005534(Insr),ENSMUSG00000005583(Mef2c),ENSMUSG00000005958(Ephb3),ENSMUSG00000006235(Epor),ENSMUSG00000006435(Neurl1a),ENSMUSG00000007613(Tgfbr1),ENSMUSG00000009621(Vav2),ENSMUSG00000013483(Card14),ENSMUSG00000014158(Trpv4),ENSMUSG00000014426(Map3k4),ENSMUSG00000016349(Eef1a2),ENSMUSG00000016984(Etaa1),ENSMUSG00000017466(Timp2),ENSMUS…
BP	GO:0045937	positive regulation of phosphate metabolic process	242	131	373	1156	1.01603e-16	6.00701e-15	ENSMUSG00000000184(Ccnd2),ENSMUSG00000000409(Lck),ENSMUSG00000000532(Acvr1b),ENSMUSG00000000555(Itga5),ENSMUSG00000000982(Ccl3),ENSMUSG00000001123(Lgals9),ENSMUSG00000001175(Calm1),ENSMUSG00000002307(Daxx),ENSMUSG00000002413(Braf),ENSMUSG00000002602(Axl),ENSMUSG00000002699(Lcp2),ENSMUSG00000003226(Ranbp2),ENSMUSG00000003948(Mmd),ENSMUSG00000004040(Stat3),ENSMUSG00000004085(Map3k20),ENSMUSG0000000…	ENSMUSG00000000869(Il4),ENSMUSG00000005102(Eif2ak4),ENSMUSG00000005534(Insr),ENSMUSG00000005583(Mef2c),ENSMUSG00000005958(Ephb3),ENSMUSG00000006235(Epor),ENSMUSG00000006435(Neurl1a),ENSMUSG00000007613(Tgfbr1),ENSMUSG00000009621(Vav2),ENSMUSG00000013483(Card14),ENSMUSG00000014158(Trpv4),ENSMUSG00000014426(Map3k4),ENSMUSG00000016349(Eef1a2),ENSMUSG00000016984(Etaa1),ENSMUSG00000017466(Timp2),ENSMUS…
MF	GO:0016740	transferase activity	343	324	667	2303	1.09569e-16	6.45474e-15	ENSMUSG00000000275(Trim25),ENSMUSG00000000409(Lck),ENSMUSG00000000532(Acvr1b),ENSMUSG00000000628(Hk2),ENSMUSG00000000708(Kat2b),ENSMUSG00000000730(Dnmt3l),ENSMUSG00000000776(Polr3d),ENSMUSG00000000982(Ccl3),ENSMUSG00000001098(Kctd10),ENSMUSG00000001166(Oas1c),ENSMUSG00000001168(Oas1h),ENSMUSG00000001630(Stk38l),ENSMUSG00000001632(Brpf1),ENSMUSG00000001663(Gstt1),ENSMUSG00000002413(Braf),ENSMUSG00…	ENSMUSG00000000326(Comt),ENSMUSG00000001054(Rmnd5b),ENSMUSG00000001228(Uhrf1),ENSMUSG00000001665(Gstt3),ENSMUSG00000001755(Coasy),ENSMUSG00000002109(Ddb2),ENSMUSG00000002409(Dyrk1b),ENSMUSG00000002625(Akap8l),ENSMUSG00000003421(Nosip),ENSMUSG00000003623(Crot),ENSMUSG00000004032(Gstm5),ENSMUSG00000004099(Dnmt1),ENSMUSG00000004561(Mettl17),ENSMUSG00000004667(Polr2e),ENSMUSG00000004798(Ulk2),ENSMUSG…
MF	GO:0008144	drug binding	247	267	514	1698	1.21646e-16	7.14063e-15	ENSMUSG00000000409(Lck),ENSMUSG00000000532(Acvr1b),ENSMUSG00000000628(Hk2),ENSMUSG00000001416(Cct3),ENSMUSG00000001630(Stk38l),ENSMUSG00000002227(Mov10),ENSMUSG00000002413(Braf),ENSMUSG00000002602(Axl),ENSMUSG00000003119(Cdk12),ENSMUSG00000003283(Hck),ENSMUSG00000003752(Itpkc),ENSMUSG00000003808(Farsa),ENSMUSG00000004085(Map3k20),ENSMUSG00000004317(Clcn5),ENSMUSG00000004591(Pkn2),ENSMUSG000000046…	ENSMUSG00000000631(Myo18a),ENSMUSG00000000673(Haao),ENSMUSG00000001436(Slc19a1),ENSMUSG00000001755(Coasy),ENSMUSG00000001827(Folr1),ENSMUSG00000002308(Cd320),ENSMUSG00000002409(Dyrk1b),ENSMUSG00000002870(Mcm2),ENSMUSG00000004187(Kifc2),ENSMUSG00000004561(Mettl17),ENSMUSG00000004798(Ulk2),ENSMUSG00000004933(Matk),ENSMUSG00000005045(Chd5),ENSMUSG00000005102(Eif2ak4),ENSMUSG00000005370(Msh6),ENSMUSG…
BP	GO:0050789	regulation of biological process	1599	1364	2963	12354	1.51782e-16	8.87788e-15	ENSMUSG00000000001(Gnai3),ENSMUSG00000000078(Klf6),ENSMUSG00000000184(Ccnd2),ENSMUSG00000000247(Lhx2),ENSMUSG00000000248(Clec2g),ENSMUSG00000000275(Trim25),ENSMUSG00000000385(Tmprss2),ENSMUSG00000000409(Lck),ENSMUSG00000000532(Acvr1b),ENSMUSG00000000555(Itga5),ENSMUSG00000000568(Hnrnpd),ENSMUSG00000000600(Krit1),ENSMUSG00000000628(Hk2),ENSMUSG00000000708(Kat2b),ENSMUSG00000000730(Dnmt3l),ENSMUSG0…	ENSMUSG00000000028(Cdc45),ENSMUSG00000000149(Gna12),ENSMUSG00000000282(Mnt),ENSMUSG00000000326(Comt),ENSMUSG00000000440(Pparg),ENSMUSG00000000631(Myo18a),ENSMUSG00000000751(Rpa1),ENSMUSG00000000869(Il4),ENSMUSG00000001036(Epn2),ENSMUSG00000001120(Pcbp3),ENSMUSG00000001227(Sema6b),ENSMUSG00000001228(Uhrf1),ENSMUSG00000001366(Fbxo9),ENSMUSG00000001419(Mef2d),ENSMUSG00000001482(Def8),ENSMUSG00000001…
BP	GO:0071222	cellular response to lipopolysaccharide	86	17	103	219	2.02436e-16	1.17987e-14	ENSMUSG00000000982(Ccl3),ENSMUSG00000002602(Axl),ENSMUSG00000004296(Il12b),ENSMUSG00000015305(Sash1),ENSMUSG00000016496(Cd274),ENSMUSG00000016529(Il10),ENSMUSG00000017652(Cd40),ENSMUSG00000018920(Cxcl16),ENSMUSG00000019850(Tnfaip3),ENSMUSG00000020638(Cmpk2),ENSMUSG00000020826(Nos2),ENSMUSG00000021025(Nfkbia),ENSMUSG00000021423(Ly86),ENSMUSG00000021936(Mapk8),ENSMUSG00000022122(Ednrb),ENSMUSG00000…	ENSMUSG00000005583(Mef2c),ENSMUSG00000005951(Shpk),ENSMUSG00000006728(Cdk4),ENSMUSG00000008855(Hdac5),ENSMUSG00000020399(Havcr2),ENSMUSG00000020889(Nr1d1),ENSMUSG00000021699(Pde4d),ENSMUSG00000024975(Pdcd4),ENSMUSG00000025586(Cpeb1),ENSMUSG00000026842(Abl1),ENSMUSG00000027843(Ptpn22),ENSMUSG00000032377(Plscr4),ENSMUSG00000037936(Scarb1),ENSMUSG00000038481(Cdk19),ENSMUSG00000052336(Cx3cr1),ENSMUSG…
BP	GO:1903037	regulation of leukocyte cell-cell adhesion	90	39	129	299	2.13766e-16	1.24151e-14	ENSMUSG00000000409(Lck),ENSMUSG00000000732(Icosl),ENSMUSG00000000791(Il12rb1),ENSMUSG00000001123(Lgals9),ENSMUSG00000001300(Efnb2),ENSMUSG00000004043(Stat5a),ENSMUSG00000004266(Ptpn6),ENSMUSG00000004296(Il12b),ENSMUSG00000004709(Cd244a),ENSMUSG00000005087(Cd44),ENSMUSG00000007655(Cav1),ENSMUSG00000015316(Slamf1),ENSMUSG00000015396(Cd83),ENSMUSG00000016206(H2-M3),ENSMUSG00000016496(Cd274),ENSMUSG0…	ENSMUSG00000000869(Il4),ENSMUSG00000003518(Dusp3),ENSMUSG00000003882(Il7r),ENSMUSG00000013707(Tnfaip8l2),ENSMUSG00000016493(Cd46),ENSMUSG00000017697(Ada),ENSMUSG00000020399(Havcr2),ENSMUSG00000021756(Il6st),ENSMUSG00000022367(Has2),ENSMUSG00000023915(Tnfrsf21),ENSMUSG00000024978(Gpam),ENSMUSG00000025880(Smad7),ENSMUSG00000026012(Cd28),ENSMUSG00000026117(Zap70),ENSMUSG00000027239(Mdk),ENSMUSG00000…
BP	GO:0060326	cell chemotaxis	100	29	129	300	2.94435e-16	1.70399e-14	ENSMUSG00000000982(Ccl3),ENSMUSG00000002897(Il17ra),ENSMUSG00000006134(Crkl),ENSMUSG00000009185(Ccl8),ENSMUSG00000009376(Met),ENSMUSG00000014599(Csf1),ENSMUSG00000015316(Slamf1),ENSMUSG00000017776(Crk),ENSMUSG00000018920(Cxcl16),ENSMUSG00000018930(Ccl4),ENSMUSG00000019122(Ccl9),ENSMUSG00000021367(Edn1),ENSMUSG00000021457(Syk),ENSMUSG00000021702(Thbs4),ENSMUSG00000021948(Prkcd),ENSMUSG00000022122(…	ENSMUSG00000000869(Il4),ENSMUSG00000001741(Il16),ENSMUSG00000014158(Trpv4),ENSMUSG00000017670(Elmo2),ENSMUSG00000021508(Cxcl14),ENSMUSG00000021699(Pde4d),ENSMUSG00000022676(Snai2),ENSMUSG00000024962(Vegfb),ENSMUSG00000026271(Gpr35),ENSMUSG00000027239(Mdk),ENSMUSG00000028864(Hgf),ENSMUSG00000028927(Padi2),ENSMUSG00000031385(Plxnb3),ENSMUSG00000031451(Gas6),ENSMUSG00000031565(Fgfr1),ENSMUSG00000031…
BP	GO:0045088	regulation of innate immune response	78	11	89	179	3.10348e-16	1.78978e-14	ENSMUSG00000000776(Polr3d),ENSMUSG00000001123(Lgals9),ENSMUSG00000004043(Stat5a),ENSMUSG00000004296(Il12b),ENSMUSG00000010358(Ifi35),ENSMUSG00000016206(H2-M3),ENSMUSG00000017776(Crk),ENSMUSG00000017830(Dhx58),ENSMUSG00000018160(Med1),ENSMUSG00000018899(Irf1),ENSMUSG00000019471(Cdc37),ENSMUSG00000019850(Tnfaip3),ENSMUSG00000020115(Tbk1),ENSMUSG00000020227(Irak3),ENSMUSG00000020707(Rnf135),ENSMUSG0…	ENSMUSG00000000440(Pparg),ENSMUSG00000020263(Appl2),ENSMUSG00000020399(Havcr2),ENSMUSG00000022471(Xrcc6),ENSMUSG00000022672(Prkdc),ENSMUSG00000031077(Fadd),ENSMUSG00000032109(Nlrx1),ENSMUSG00000035834(Polr3g),ENSMUSG00000037523(Mavs),ENSMUSG00000042672(Dcst1),ENSMUSG00000079685(Ulbp1)
BP	GO:0051726	regulation of cell cycle	161	160	321	971	4.09844e-16	2.35531e-14	ENSMUSG00000000184(Ccnd2),ENSMUSG00000000708(Kat2b),ENSMUSG00000001175(Calm1),ENSMUSG00000001786(Fbxo7),ENSMUSG00000003119(Cdk12),ENSMUSG00000004040(Stat3),ENSMUSG00000004043(Stat5a),ENSMUSG00000004085(Map3k20),ENSMUSG00000004266(Ptpn6),ENSMUSG00000004296(Il12b),ENSMUSG00000004364(Cul3),ENSMUSG00000004446(Bid),ENSMUSG00000004591(Pkn2),ENSMUSG00000004771(Rab11a),ENSMUSG00000004936(Map2k1),ENSMUSG0…	ENSMUSG00000000282(Mnt),ENSMUSG00000002055(Spag5),ENSMUSG00000002871(Tpra1),ENSMUSG00000002968(Med25),ENSMUSG00000003518(Dusp3),ENSMUSG00000005102(Eif2ak4),ENSMUSG00000005469(Prkaca),ENSMUSG00000005534(Insr),ENSMUSG00000005718(Tfap4),ENSMUSG00000006715(Gmnn),ENSMUSG00000006728(Cdk4),ENSMUSG00000007646(Rad51c),ENSMUSG00000010051(Hyal1),ENSMUSG00000012483(Rpa3),ENSMUSG00000016984(Etaa1),ENSMUSG0000…
BP	GO:0050863	regulation of T cell activation	92	39	131	308	4.97108e-16	2.84685e-14	ENSMUSG00000000409(Lck),ENSMUSG00000000732(Icosl),ENSMUSG00000000791(Il12rb1),ENSMUSG00000001123(Lgals9),ENSMUSG00000001300(Efnb2),ENSMUSG00000002413(Braf),ENSMUSG00000004043(Stat5a),ENSMUSG00000004266(Ptpn6),ENSMUSG00000004296(Il12b),ENSMUSG00000004709(Cd244a),ENSMUSG00000007655(Cav1),ENSMUSG00000015316(Slamf1),ENSMUSG00000015396(Cd83),ENSMUSG00000016206(H2-M3),ENSMUSG00000016496(Cd274),ENSMUSG0…	ENSMUSG00000000869(Il4),ENSMUSG00000003518(Dusp3),ENSMUSG00000003882(Il7r),ENSMUSG00000013707(Tnfaip8l2),ENSMUSG00000016493(Cd46),ENSMUSG00000017697(Ada),ENSMUSG00000020399(Havcr2),ENSMUSG00000021756(Il6st),ENSMUSG00000023915(Tnfrsf21),ENSMUSG00000024978(Gpam),ENSMUSG00000025880(Smad7),ENSMUSG00000026012(Cd28),ENSMUSG00000026117(Zap70),ENSMUSG00000026842(Abl1),ENSMUSG00000027239(Mdk),ENSMUSG00000…
BP	GO:0009890	negative regulation of biosynthetic process	251	254	505	1675	5.17195e-16	2.9516e-14	ENSMUSG00000000568(Hnrnpd),ENSMUSG00000000730(Dnmt3l),ENSMUSG00000000838(Fmr1),ENSMUSG00000001156(Mxd1),ENSMUSG00000001288(Rarg),ENSMUSG00000001348(Acp5),ENSMUSG00000002111(Spi1),ENSMUSG00000002227(Mov10),ENSMUSG00000002307(Daxx),ENSMUSG00000002578(Ikzf4),ENSMUSG00000002881(Nab1),ENSMUSG00000002983(Relb),ENSMUSG00000003382(Etv3),ENSMUSG00000004040(Stat3),ENSMUSG00000004364(Cul3),ENSMUSG0000000577…	ENSMUSG00000000028(Cdc45),ENSMUSG00000000282(Mnt),ENSMUSG00000000440(Pparg),ENSMUSG00000000869(Il4),ENSMUSG00000001120(Pcbp3),ENSMUSG00000001228(Uhrf1),ENSMUSG00000001761(Smo),ENSMUSG00000002968(Med25),ENSMUSG00000004099(Dnmt1),ENSMUSG00000005045(Chd5),ENSMUSG00000005102(Eif2ak4),ENSMUSG00000005583(Mef2c),ENSMUSG00000005718(Tfap4),ENSMUSG00000005893(Nr2c2),ENSMUSG00000005949(Ctns),ENSMUSG00000006…
BP	GO:1902107	positive regulation of leukocyte differentiation	60	26	86	172	6.35961e-16	3.61684e-14	ENSMUSG00000000409(Lck),ENSMUSG00000000957(Mmp14),ENSMUSG00000000982(Ccl3),ENSMUSG00000001123(Lgals9),ENSMUSG00000002602(Axl),ENSMUSG00000004043(Stat5a),ENSMUSG00000004296(Il12b),ENSMUSG00000014599(Csf1),ENSMUSG00000015396(Cd83),ENSMUSG00000016206(H2-M3),ENSMUSG00000016529(Il10),ENSMUSG00000018899(Irf1),ENSMUSG00000019982(Myb),ENSMUSG00000021270(Hsp90aa1),ENSMUSG00000021457(Syk),ENSMUSG0000002168…	ENSMUSG00000000869(Il4),ENSMUSG00000003882(Il7r),ENSMUSG00000016493(Cd46),ENSMUSG00000017697(Ada),ENSMUSG00000020689(Itgb3),ENSMUSG00000021127(Zfp36l1),ENSMUSG00000021250(Fos),ENSMUSG00000022105(Rb1),ENSMUSG00000022672(Prkdc),ENSMUSG00000026117(Zap70),ENSMUSG00000026288(Inpp5d),ENSMUSG00000027239(Mdk),ENSMUSG00000028988(Ctnnbip1),ENSMUSG00000029204(Rhoh),ENSMUSG00000031077(Fadd),ENSMUSG0000003110…
BP	GO:1903039	positive regulation of leukocyte cell-cell adhesion	72	28	100	213	6.41312e-16	3.63469e-14	ENSMUSG00000000409(Lck),ENSMUSG00000000732(Icosl),ENSMUSG00000000791(Il12rb1),ENSMUSG00000001123(Lgals9),ENSMUSG00000001300(Efnb2),ENSMUSG00000004043(Stat5a),ENSMUSG00000004296(Il12b),ENSMUSG00000004709(Cd244a),ENSMUSG00000005087(Cd44),ENSMUSG00000007655(Cav1),ENSMUSG00000015316(Slamf1),ENSMUSG00000015396(Cd83),ENSMUSG00000016206(H2-M3),ENSMUSG00000016496(Cd274),ENSMUSG00000018899(Irf1),ENSMUSG00…	ENSMUSG00000000869(Il4),ENSMUSG00000003882(Il7r),ENSMUSG00000016493(Cd46),ENSMUSG00000017697(Ada),ENSMUSG00000020399(Havcr2),ENSMUSG00000021756(Il6st),ENSMUSG00000022367(Has2),ENSMUSG00000024978(Gpam),ENSMUSG00000026012(Cd28),ENSMUSG00000026117(Zap70),ENSMUSG00000027239(Mdk),ENSMUSG00000027843(Ptpn22),ENSMUSG00000029204(Rhoh),ENSMUSG00000029657(Hsph1),ENSMUSG00000029869(Ephb6),ENSMUSG00000030528(…
BP	GO:0001934	positive regulation of protein phosphorylation	215	116	331	1011	6.46037e-16	3.64889e-14	ENSMUSG00000000184(Ccnd2),ENSMUSG00000000409(Lck),ENSMUSG00000000532(Acvr1b),ENSMUSG00000000555(Itga5),ENSMUSG00000000982(Ccl3),ENSMUSG00000001123(Lgals9),ENSMUSG00000002307(Daxx),ENSMUSG00000002413(Braf),ENSMUSG00000002699(Lcp2),ENSMUSG00000003948(Mmd),ENSMUSG00000004085(Map3k20),ENSMUSG00000004221(Ikbkg),ENSMUSG00000004296(Il12b),ENSMUSG00000004451(Ralb),ENSMUSG00000004936(Map2k1),ENSMUSG000000…	ENSMUSG00000000869(Il4),ENSMUSG00000005102(Eif2ak4),ENSMUSG00000005534(Insr),ENSMUSG00000005583(Mef2c),ENSMUSG00000006235(Epor),ENSMUSG00000006435(Neurl1a),ENSMUSG00000007613(Tgfbr1),ENSMUSG00000013483(Card14),ENSMUSG00000014158(Trpv4),ENSMUSG00000014426(Map3k4),ENSMUSG00000016984(Etaa1),ENSMUSG00000017466(Timp2),ENSMUSG00000018849(Wwc1),ENSMUSG00000018909(Arrb1),ENSMUSG00000020167(Tcf3),ENSMUSG0…
BP	GO:0030217	T cell differentiation	76	41	117	265	6.87852e-16	3.87176e-14	ENSMUSG00000000409(Lck),ENSMUSG00000001123(Lgals9),ENSMUSG00000002413(Braf),ENSMUSG00000002983(Relb),ENSMUSG00000004040(Stat3),ENSMUSG00000004043(Stat5a),ENSMUSG00000004296(Il12b),ENSMUSG00000015396(Cd83),ENSMUSG00000016206(H2-M3),ENSMUSG00000018899(Irf1),ENSMUSG00000019982(Myb),ENSMUSG00000020641(Rsad2),ENSMUSG00000021270(Hsp90aa1),ENSMUSG00000021457(Syk),ENSMUSG00000021686(Ap3b1),ENSMUSG0000002…	ENSMUSG00000000869(Il4),ENSMUSG00000003882(Il7r),ENSMUSG00000016493(Cd46),ENSMUSG00000017697(Ada),ENSMUSG00000020167(Tcf3),ENSMUSG00000020453(Patz1),ENSMUSG00000020605(Hs1bp3),ENSMUSG00000021127(Zfp36l1),ENSMUSG00000021356(Irf4),ENSMUSG00000022672(Prkdc),ENSMUSG00000023927(Satb1),ENSMUSG00000025880(Smad7),ENSMUSG00000026012(Cd28),ENSMUSG00000026117(Zap70),ENSMUSG00000026471(Mr1),ENSMUSG0000002684…
BP	GO:0022402	cell cycle process	164	202	366	1143	7.30554e-16	4.09809e-14	ENSMUSG00000000184(Ccnd2),ENSMUSG00000000532(Acvr1b),ENSMUSG00000000708(Kat2b),ENSMUSG00000000730(Dnmt3l),ENSMUSG00000001175(Calm1),ENSMUSG00000001440(Kpnb1),ENSMUSG00000001786(Fbxo7),ENSMUSG00000002233(Rhoc),ENSMUSG00000004085(Map3k20),ENSMUSG00000004266(Ptpn6),ENSMUSG00000004296(Il12b),ENSMUSG00000004364(Cul3),ENSMUSG00000004446(Bid),ENSMUSG00000004591(Pkn2),ENSMUSG00000004771(Rab11a),ENSMUSG00…	ENSMUSG00000000028(Cdc45),ENSMUSG00000002055(Spag5),ENSMUSG00000002625(Akap8l),ENSMUSG00000002870(Mcm2),ENSMUSG00000002871(Tpra1),ENSMUSG00000002968(Med25),ENSMUSG00000005102(Eif2ak4),ENSMUSG00000005370(Msh6),ENSMUSG00000005469(Prkaca),ENSMUSG00000005534(Insr),ENSMUSG00000005699(Pard6a),ENSMUSG00000005718(Tfap4),ENSMUSG00000006678(Pola1),ENSMUSG00000006715(Gmnn),ENSMUSG00000006728(Cdk4),ENSMUSG00…
BP	GO:1903555	regulation of tumor necrosis factor superfamily cytokine production	70	12	82	161	7.59765e-16	4.24745e-14	ENSMUSG00000000982(Ccl3),ENSMUSG00000001123(Lgals9),ENSMUSG00000001348(Acp5),ENSMUSG00000002602(Axl),ENSMUSG00000004040(Stat3),ENSMUSG00000004266(Ptpn6),ENSMUSG00000004296(Il12b),ENSMUSG00000015316(Slamf1),ENSMUSG00000015340(Cybb),ENSMUSG00000016496(Cd274),ENSMUSG00000016528(Mapkapk2),ENSMUSG00000016529(Il10),ENSMUSG00000018930(Ccl4),ENSMUSG00000019850(Tnfaip3),ENSMUSG00000020227(Irak3),ENSMUSG00…	ENSMUSG00000000869(Il4),ENSMUSG00000020399(Havcr2),ENSMUSG00000022708(Zbtb20),ENSMUSG00000027843(Ptpn22),ENSMUSG00000031077(Fadd),ENSMUSG00000031101(Sash3),ENSMUSG00000031451(Gas6),ENSMUSG00000037523(Mavs),ENSMUSG00000039521(Foxp3),ENSMUSG00000052336(Cx3cr1),ENSMUSG00000064177(Ghrl),ENSMUSG00000068923(Syt11)
BP	GO:0002224	toll-like receptor signaling pathway	50	14	64	112	7.97566e-16	4.44366e-14	ENSMUSG00000001123(Lgals9),ENSMUSG00000005312(Ubqln1),ENSMUSG00000007655(Cav1),ENSMUSG00000010358(Ifi35),ENSMUSG00000016528(Mapkapk2),ENSMUSG00000017652(Cd40),ENSMUSG00000018899(Irf1),ENSMUSG00000019850(Tnfaip3),ENSMUSG00000020134(Peli1),ENSMUSG00000020227(Irak3),ENSMUSG00000020400(Tnip1),ENSMUSG00000020641(Rsad2),ENSMUSG00000021025(Nfkbia),ENSMUSG00000021686(Ap3b1),ENSMUSG00000022892(App),ENSMUS…	ENSMUSG00000013236(Ptprs),ENSMUSG00000020263(Appl2),ENSMUSG00000020399(Havcr2),ENSMUSG00000020889(Nr1d1),ENSMUSG00000021356(Irf4),ENSMUSG00000027843(Ptpn22),ENSMUSG00000033777(Tlr13),ENSMUSG00000034652(Cd300a),ENSMUSG00000035900(Gramd4),ENSMUSG00000036103(Colec12),ENSMUSG00000047798(Cd300lf),ENSMUSG00000050132(Sarm1),ENSMUSG00000052688(Rab7b),ENSMUSG00000070056(Mfhas1)
BP	GO:0071216	cellular response to biotic stimulus	94	18	112	250	8.04547e-16	4.46741e-14	ENSMUSG00000000982(Ccl3),ENSMUSG00000002602(Axl),ENSMUSG00000004296(Il12b),ENSMUSG00000004446(Bid),ENSMUSG00000015305(Sash1),ENSMUSG00000016496(Cd274),ENSMUSG00000016529(Il10),ENSMUSG00000017652(Cd40),ENSMUSG00000018920(Cxcl16),ENSMUSG00000019850(Tnfaip3),ENSMUSG00000020638(Cmpk2),ENSMUSG00000020826(Nos2),ENSMUSG00000021025(Nfkbia),ENSMUSG00000021423(Ly86),ENSMUSG00000021457(Syk),ENSMUSG000000219…	ENSMUSG00000005583(Mef2c),ENSMUSG00000005951(Shpk),ENSMUSG00000006728(Cdk4),ENSMUSG00000008855(Hdac5),ENSMUSG00000020399(Havcr2),ENSMUSG00000020889(Nr1d1),ENSMUSG00000021699(Pde4d),ENSMUSG00000024975(Pdcd4),ENSMUSG00000025586(Cpeb1),ENSMUSG00000026842(Abl1),ENSMUSG00000027843(Ptpn22),ENSMUSG00000031668(Eif2ak3),ENSMUSG00000032377(Plscr4),ENSMUSG00000037936(Scarb1),ENSMUSG00000038481(Cdk19),ENSMUS…
BP	GO:0051270	regulation of cellular component movement	211	133	344	1061	8.08814e-16	4.47598e-14	ENSMUSG00000000532(Acvr1b),ENSMUSG00000000555(Itga5),ENSMUSG00000000600(Krit1),ENSMUSG00000000957(Mmp14),ENSMUSG00000000982(Ccl3),ENSMUSG00000001123(Lgals9),ENSMUSG00000001435(Col18a1),ENSMUSG00000001768(Rin2),ENSMUSG00000002233(Rhoc),ENSMUSG00000002413(Braf),ENSMUSG00000003665(Has1),ENSMUSG00000004040(Stat3),ENSMUSG00000004043(Stat5a),ENSMUSG00000004044(Cavin1),ENSMUSG00000004591(Pkn2),ENSMUSG00…	ENSMUSG00000000149(Gna12),ENSMUSG00000000440(Pparg),ENSMUSG00000000869(Il4),ENSMUSG00000001227(Sema6b),ENSMUSG00000001761(Smo),ENSMUSG00000003518(Dusp3),ENSMUSG00000004462(Tbccd1),ENSMUSG00000004530(Coro1c),ENSMUSG00000005534(Insr),ENSMUSG00000005583(Mef2c),ENSMUSG00000006464(Bbs1),ENSMUSG00000007613(Tgfbr1),ENSMUSG00000008855(Hdac5),ENSMUSG00000010047(Hyal2),ENSMUSG00000010051(Hyal1),ENSMUSG0000…
BP	GO:0051649	establishment of localization in cell	316	273	589	2011	8.70674e-16	4.80215e-14	ENSMUSG00000000409(Lck),ENSMUSG00000000982(Ccl3),ENSMUSG00000001052(Sec24b),ENSMUSG00000001123(Lgals9),ENSMUSG00000001175(Calm1),ENSMUSG00000001300(Efnb2),ENSMUSG00000001440(Kpnb1),ENSMUSG00000001786(Fbxo7),ENSMUSG00000002413(Braf),ENSMUSG00000003226(Ranbp2),ENSMUSG00000003352(Cacnb3),ENSMUSG00000003746(Man1a),ENSMUSG00000003863(Ppfia3),ENSMUSG00000004040(Stat3),ENSMUSG00000004221(Ikbkg),ENSMUSG0…	ENSMUSG00000000869(Il4),ENSMUSG00000001143(Lman2l),ENSMUSG00000001761(Smo),ENSMUSG00000001827(Folr1),ENSMUSG00000002031(Ift46),ENSMUSG00000002055(Spag5),ENSMUSG00000002083(Bbc3),ENSMUSG00000002625(Akap8l),ENSMUSG00000003134(Tbc1d8),ENSMUSG00000003378(Grik5),ENSMUSG00000003452(Bicd1),ENSMUSG00000004347(Pde1c),ENSMUSG00000004530(Coro1c),ENSMUSG00000004567(Mcoln1),ENSMUSG00000004768(Rab23),ENSMUSG00…
BP	GO:0032946	positive regulation of mononuclear cell proliferation	46	25	71	131	9.74623e-16	5.3575e-14	ENSMUSG00000000732(Icosl),ENSMUSG00000000791(Il12rb1),ENSMUSG00000004043(Stat5a),ENSMUSG00000004296(Il12b),ENSMUSG00000004709(Cd244a),ENSMUSG00000014599(Csf1),ENSMUSG00000015316(Slamf1),ENSMUSG00000016496(Cd274),ENSMUSG00000017652(Cd40),ENSMUSG00000020134(Peli1),ENSMUSG00000021457(Syk),ENSMUSG00000022508(Bcl6),ENSMUSG00000022901(Cd86),ENSMUSG00000023067(Cdkn1a),ENSMUSG00000024397(Aif1),ENSMUSG000…	ENSMUSG00000000869(Il4),ENSMUSG00000002308(Cd320),ENSMUSG00000005583(Mef2c),ENSMUSG00000016493(Cd46),ENSMUSG00000017550(Atad5),ENSMUSG00000017697(Ada),ENSMUSG00000020167(Tcf3),ENSMUSG00000020399(Havcr2),ENSMUSG00000021756(Il6st),ENSMUSG00000022885(St6gal1),ENSMUSG00000024978(Gpam),ENSMUSG00000026012(Cd28),ENSMUSG00000026117(Zap70),ENSMUSG00000027544(Nfatc2),ENSMUSG00000027843(Ptpn22),ENSMUSG00000…
BP	GO:0002833	positive regulation of response to biotic stimulus	69	12	81	159	1.11911e-15	6.11083e-14	ENSMUSG00000000776(Polr3d),ENSMUSG00000001123(Lgals9),ENSMUSG00000004043(Stat5a),ENSMUSG00000004296(Il12b),ENSMUSG00000010358(Ifi35),ENSMUSG00000015305(Sash1),ENSMUSG00000016206(H2-M3),ENSMUSG00000016496(Cd274),ENSMUSG00000017830(Dhx58),ENSMUSG00000018160(Med1),ENSMUSG00000020115(Tbk1),ENSMUSG00000020124(Usp15),ENSMUSG00000021270(Hsp90aa1),ENSMUSG00000021423(Ly86),ENSMUSG00000021938(Pspc1),ENSMUS…	ENSMUSG00000020399(Havcr2),ENSMUSG00000022471(Xrcc6),ENSMUSG00000022672(Prkdc),ENSMUSG00000026471(Mr1),ENSMUSG00000026792(Lrsam1),ENSMUSG00000028456(Unc13b),ENSMUSG00000029821(Gsdme),ENSMUSG00000031077(Fadd),ENSMUSG00000035834(Polr3g),ENSMUSG00000037523(Mavs),ENSMUSG00000049709(Nlrp10),ENSMUSG00000079685(Ulbp1)
BP	GO:0032680	regulation of tumor necrosis factor production	69	12	81	159	1.11911e-15	6.11083e-14	ENSMUSG00000000982(Ccl3),ENSMUSG00000001123(Lgals9),ENSMUSG00000001348(Acp5),ENSMUSG00000002602(Axl),ENSMUSG00000004040(Stat3),ENSMUSG00000004266(Ptpn6),ENSMUSG00000004296(Il12b),ENSMUSG00000015316(Slamf1),ENSMUSG00000015340(Cybb),ENSMUSG00000016528(Mapkapk2),ENSMUSG00000016529(Il10),ENSMUSG00000018930(Ccl4),ENSMUSG00000019850(Tnfaip3),ENSMUSG00000020227(Irak3),ENSMUSG00000021457(Syk),ENSMUSG0000…	ENSMUSG00000000869(Il4),ENSMUSG00000020399(Havcr2),ENSMUSG00000022708(Zbtb20),ENSMUSG00000027843(Ptpn22),ENSMUSG00000031077(Fadd),ENSMUSG00000031101(Sash3),ENSMUSG00000031451(Gas6),ENSMUSG00000037523(Mavs),ENSMUSG00000039521(Foxp3),ENSMUSG00000052336(Cx3cr1),ENSMUSG00000064177(Ghrl),ENSMUSG00000068923(Syt11)
BP	GO:0030030	cell projection organization	222	253	475	1566	1.37698e-15	7.49407e-14	ENSMUSG00000000247(Lhx2),ENSMUSG00000000708(Kat2b),ENSMUSG00000001052(Sec24b),ENSMUSG00000001300(Efnb2),ENSMUSG00000001627(Ifrd1),ENSMUSG00000001786(Fbxo7),ENSMUSG00000002227(Mov10),ENSMUSG00000002413(Braf),ENSMUSG00000003070(Efna2),ENSMUSG00000003269(Cyth2),ENSMUSG00000004364(Cul3),ENSMUSG00000004591(Pkn2),ENSMUSG00000004771(Rab11a),ENSMUSG00000004936(Map2k1),ENSMUSG00000005087(Cd44),ENSMUSG0000…	ENSMUSG00000001227(Sema6b),ENSMUSG00000001482(Def8),ENSMUSG00000001761(Smo),ENSMUSG00000001827(Folr1),ENSMUSG00000002031(Ift46),ENSMUSG00000002274(Metrn),ENSMUSG00000002486(Tchp),ENSMUSG00000003575(Crtc1),ENSMUSG00000004151(Etv1),ENSMUSG00000004530(Coro1c),ENSMUSG00000004768(Rab23),ENSMUSG00000004798(Ulk2),ENSMUSG00000005102(Eif2ak4),ENSMUSG00000005534(Insr),ENSMUSG00000005583(Mef2c),ENSMUSG00000…
BP	GO:0008283	cell population proliferation	338	250	588	2012	1.49176e-15	8.09194e-14	ENSMUSG00000000001(Gnai3),ENSMUSG00000000184(Ccnd2),ENSMUSG00000000247(Lhx2),ENSMUSG00000000409(Lck),ENSMUSG00000000600(Krit1),ENSMUSG00000000708(Kat2b),ENSMUSG00000000732(Icosl),ENSMUSG00000000791(Il12rb1),ENSMUSG00000000957(Mmp14),ENSMUSG00000001123(Lgals9),ENSMUSG00000001288(Rarg),ENSMUSG00000001300(Efnb2),ENSMUSG00000001435(Col18a1),ENSMUSG00000001632(Brpf1),ENSMUSG00000001707(Eef1e1),ENSMUSG…	ENSMUSG00000000149(Gna12),ENSMUSG00000000326(Comt),ENSMUSG00000000440(Pparg),ENSMUSG00000000751(Rpa1),ENSMUSG00000000869(Il4),ENSMUSG00000001228(Uhrf1),ENSMUSG00000001419(Mef2d),ENSMUSG00000001761(Smo),ENSMUSG00000002308(Cd320),ENSMUSG00000002731(Prkra),ENSMUSG00000002968(Med25),ENSMUSG00000003282(Plag1),ENSMUSG00000003882(Il7r),ENSMUSG00000004099(Dnmt1),ENSMUSG00000005045(Chd5),ENSMUSG0000000546…
BP	GO:0006810	transport	604	547	1151	4335	1.69182e-15	9.14694e-14	ENSMUSG00000000001(Gnai3),ENSMUSG00000000385(Tmprss2),ENSMUSG00000000409(Lck),ENSMUSG00000000628(Hk2),ENSMUSG00000000915(Hip1r),ENSMUSG00000000982(Ccl3),ENSMUSG00000001052(Sec24b),ENSMUSG00000001123(Lgals9),ENSMUSG00000001175(Calm1),ENSMUSG00000001248(Gramd1a),ENSMUSG00000001300(Efnb2),ENSMUSG00000001416(Cct3),ENSMUSG00000001440(Kpnb1),ENSMUSG00000001467(Cyp51),ENSMUSG00000001768(Rin2),ENSMUSG000…	ENSMUSG00000000326(Comt),ENSMUSG00000000440(Pparg),ENSMUSG00000000631(Myo18a),ENSMUSG00000000869(Il4),ENSMUSG00000001036(Epn2),ENSMUSG00000001138(Cnnm3),ENSMUSG00000001143(Lman2l),ENSMUSG00000001436(Slc19a1),ENSMUSG00000001741(Il16),ENSMUSG00000001761(Smo),ENSMUSG00000001827(Folr1),ENSMUSG00000002031(Ift46),ENSMUSG00000002055(Spag5),ENSMUSG00000002083(Bbc3),ENSMUSG00000002308(Cd320),ENSMUSG000000…
BP	GO:0071706	tumor necrosis factor superfamily cytokine production	70	12	82	163	1.90887e-15	1.02866e-13	ENSMUSG00000000982(Ccl3),ENSMUSG00000001123(Lgals9),ENSMUSG00000001348(Acp5),ENSMUSG00000002602(Axl),ENSMUSG00000004040(Stat3),ENSMUSG00000004266(Ptpn6),ENSMUSG00000004296(Il12b),ENSMUSG00000015316(Slamf1),ENSMUSG00000015340(Cybb),ENSMUSG00000016496(Cd274),ENSMUSG00000016528(Mapkapk2),ENSMUSG00000016529(Il10),ENSMUSG00000018930(Ccl4),ENSMUSG00000019850(Tnfaip3),ENSMUSG00000020227(Irak3),ENSMUSG00…	ENSMUSG00000000869(Il4),ENSMUSG00000020399(Havcr2),ENSMUSG00000022708(Zbtb20),ENSMUSG00000027843(Ptpn22),ENSMUSG00000031077(Fadd),ENSMUSG00000031101(Sash3),ENSMUSG00000031451(Gas6),ENSMUSG00000037523(Mavs),ENSMUSG00000039521(Foxp3),ENSMUSG00000052336(Cx3cr1),ENSMUSG00000064177(Ghrl),ENSMUSG00000068923(Syt11)
BP	GO:0048856	anatomical structure development	827	693	1520	5918	1.93129e-15	1.03734e-13	ENSMUSG00000000001(Gnai3),ENSMUSG00000000247(Lhx2),ENSMUSG00000000248(Clec2g),ENSMUSG00000000409(Lck),ENSMUSG00000000532(Acvr1b),ENSMUSG00000000555(Itga5),ENSMUSG00000000568(Hnrnpd),ENSMUSG00000000600(Krit1),ENSMUSG00000000628(Hk2),ENSMUSG00000000708(Kat2b),ENSMUSG00000000730(Dnmt3l),ENSMUSG00000000732(Icosl),ENSMUSG00000000838(Fmr1),ENSMUSG00000000915(Hip1r),ENSMUSG00000000957(Mmp14),ENSMUSG0000…	ENSMUSG00000000149(Gna12),ENSMUSG00000000440(Pparg),ENSMUSG00000000751(Rpa1),ENSMUSG00000000869(Il4),ENSMUSG00000001036(Epn2),ENSMUSG00000001053(N4bp3),ENSMUSG00000001227(Sema6b),ENSMUSG00000001419(Mef2d),ENSMUSG00000001751(Naglu),ENSMUSG00000001761(Smo),ENSMUSG00000001827(Folr1),ENSMUSG00000002083(Bbc3),ENSMUSG00000002274(Metrn),ENSMUSG00000002289(Angptl4),ENSMUSG00000002409(Dyrk1b),ENSMUSG00000…
BP	GO:0031327	negative regulation of cellular biosynthetic process	245	247	492	1636	2.13133e-15	1.14106e-13	ENSMUSG00000000568(Hnrnpd),ENSMUSG00000000730(Dnmt3l),ENSMUSG00000000838(Fmr1),ENSMUSG00000001156(Mxd1),ENSMUSG00000001288(Rarg),ENSMUSG00000001348(Acp5),ENSMUSG00000002111(Spi1),ENSMUSG00000002227(Mov10),ENSMUSG00000002307(Daxx),ENSMUSG00000002578(Ikzf4),ENSMUSG00000002881(Nab1),ENSMUSG00000002983(Relb),ENSMUSG00000003382(Etv3),ENSMUSG00000004040(Stat3),ENSMUSG00000004364(Cul3),ENSMUSG0000000577…	ENSMUSG00000000028(Cdc45),ENSMUSG00000000282(Mnt),ENSMUSG00000000440(Pparg),ENSMUSG00000000869(Il4),ENSMUSG00000001120(Pcbp3),ENSMUSG00000001228(Uhrf1),ENSMUSG00000001761(Smo),ENSMUSG00000002968(Med25),ENSMUSG00000004099(Dnmt1),ENSMUSG00000005045(Chd5),ENSMUSG00000005102(Eif2ak4),ENSMUSG00000005583(Mef2c),ENSMUSG00000005718(Tfap4),ENSMUSG00000005893(Nr2c2),ENSMUSG00000005949(Ctns),ENSMUSG00000006…
BP	GO:0071900	regulation of protein serine/threonine kinase activity	110	69	179	472	2.14894e-15	1.14675e-13	ENSMUSG00000000184(Ccnd2),ENSMUSG00000000708(Kat2b),ENSMUSG00000001123(Lgals9),ENSMUSG00000001786(Fbxo7),ENSMUSG00000002413(Braf),ENSMUSG00000002997(Prkar2b),ENSMUSG00000003119(Cdk12),ENSMUSG00000004085(Map3k20),ENSMUSG00000004266(Ptpn6),ENSMUSG00000004451(Ralb),ENSMUSG00000004936(Map2k1),ENSMUSG00000006134(Crkl),ENSMUSG00000007655(Cav1),ENSMUSG00000012519(Mlkl),ENSMUSG00000015305(Sash1),ENSMUSG0…	ENSMUSG00000003518(Dusp3),ENSMUSG00000005534(Insr),ENSMUSG00000005583(Mef2c),ENSMUSG00000005718(Tfap4),ENSMUSG00000007613(Tgfbr1),ENSMUSG00000010047(Hyal2),ENSMUSG00000014426(Map3k4),ENSMUSG00000016984(Etaa1),ENSMUSG00000018669(Cdk5rap3),ENSMUSG00000018909(Arrb1),ENSMUSG00000019876(Pkib),ENSMUSG00000019960(Dusp6),ENSMUSG00000020312(Shc2),ENSMUSG00000020888(Dvl2),ENSMUSG00000021253(Tgfb3),ENSMUSG0…
BP	GO:0065008	regulation of biological quality	590	463	1053	3925	2.18228e-15	1.16078e-13	ENSMUSG00000000409(Lck),ENSMUSG00000000532(Acvr1b),ENSMUSG00000000568(Hnrnpd),ENSMUSG00000000600(Krit1),ENSMUSG00000000628(Hk2),ENSMUSG00000000682(Cd52),ENSMUSG00000000708(Kat2b),ENSMUSG00000000915(Hip1r),ENSMUSG00000000982(Ccl3),ENSMUSG00000001123(Lgals9),ENSMUSG00000001175(Calm1),ENSMUSG00000001300(Efnb2),ENSMUSG00000001348(Acp5),ENSMUSG00000001416(Cct3),ENSMUSG00000001627(Ifrd1),ENSMUSG0000000…	ENSMUSG00000000149(Gna12),ENSMUSG00000000326(Comt),ENSMUSG00000000440(Pparg),ENSMUSG00000000673(Haao),ENSMUSG00000000751(Rpa1),ENSMUSG00000000869(Il4),ENSMUSG00000001227(Sema6b),ENSMUSG00000001482(Def8),ENSMUSG00000001761(Smo),ENSMUSG00000001865(Cpa3),ENSMUSG00000001930(Vwf),ENSMUSG00000002031(Ift46),ENSMUSG00000002083(Bbc3),ENSMUSG00000002289(Angptl4),ENSMUSG00000002661(Alkbh7),ENSMUSG0000000273…
BP	GO:0071702	organic substance transport	358	339	697	2454	2.23909e-15	1.18715e-13	ENSMUSG00000000628(Hk2),ENSMUSG00000001052(Sec24b),ENSMUSG00000001248(Gramd1a),ENSMUSG00000001300(Efnb2),ENSMUSG00000001440(Kpnb1),ENSMUSG00000001467(Cyp51),ENSMUSG00000001786(Fbxo7),ENSMUSG00000002413(Braf),ENSMUSG00000003226(Ranbp2),ENSMUSG00000003352(Cacnb3),ENSMUSG00000003746(Man1a),ENSMUSG00000004040(Stat3),ENSMUSG00000004044(Cavin1),ENSMUSG00000004296(Il12b),ENSMUSG00000004446(Bid),ENSMUSG0…	ENSMUSG00000000440(Pparg),ENSMUSG00000000631(Myo18a),ENSMUSG00000001143(Lman2l),ENSMUSG00000001436(Slc19a1),ENSMUSG00000001761(Smo),ENSMUSG00000001827(Folr1),ENSMUSG00000002031(Ift46),ENSMUSG00000002083(Bbc3),ENSMUSG00000002308(Cd320),ENSMUSG00000002346(Slc25a42),ENSMUSG00000002625(Akap8l),ENSMUSG00000002910(Arrdc2),ENSMUSG00000003134(Tbc1d8),ENSMUSG00000003153(Slc2a3),ENSMUSG00000003623(Crot),EN…
CC	GO:0031090	organelle membrane	427	412	839	3052	2.57212e-15	1.35934e-13	ENSMUSG00000000001(Gnai3),ENSMUSG00000000184(Ccnd2),ENSMUSG00000000628(Hk2),ENSMUSG00000000915(Hip1r),ENSMUSG00000001052(Sec24b),ENSMUSG00000001175(Calm1),ENSMUSG00000001248(Gramd1a),ENSMUSG00000001440(Kpnb1),ENSMUSG00000001467(Cyp51),ENSMUSG00000002103(Acp2),ENSMUSG00000002105(Slc39a13),ENSMUSG00000002845(Tmem39a),ENSMUSG00000002847(Pla1a),ENSMUSG00000003226(Ranbp2),ENSMUSG00000003746(Man1a),ENS…	ENSMUSG00000000631(Myo18a),ENSMUSG00000000673(Haao),ENSMUSG00000000876(Pxmp4),ENSMUSG00000001036(Epn2),ENSMUSG00000001143(Lman2l),ENSMUSG00000001761(Smo),ENSMUSG00000002031(Ift46),ENSMUSG00000002346(Slc25a42),ENSMUSG00000003153(Slc2a3),ENSMUSG00000003346(Abhd17a),ENSMUSG00000003526(Prodh),ENSMUSG00000003809(Gcdh),ENSMUSG00000004071(Cdip1),ENSMUSG00000004530(Coro1c),ENSMUSG00000004565(Pnpla6),ENSM…
BP	GO:0032640	tumor necrosis factor production	69	12	81	161	2.81245e-15	1.48159e-13	ENSMUSG00000000982(Ccl3),ENSMUSG00000001123(Lgals9),ENSMUSG00000001348(Acp5),ENSMUSG00000002602(Axl),ENSMUSG00000004040(Stat3),ENSMUSG00000004266(Ptpn6),ENSMUSG00000004296(Il12b),ENSMUSG00000015316(Slamf1),ENSMUSG00000015340(Cybb),ENSMUSG00000016528(Mapkapk2),ENSMUSG00000016529(Il10),ENSMUSG00000018930(Ccl4),ENSMUSG00000019850(Tnfaip3),ENSMUSG00000020227(Irak3),ENSMUSG00000021457(Syk),ENSMUSG0000…	ENSMUSG00000000869(Il4),ENSMUSG00000020399(Havcr2),ENSMUSG00000022708(Zbtb20),ENSMUSG00000027843(Ptpn22),ENSMUSG00000031077(Fadd),ENSMUSG00000031101(Sash3),ENSMUSG00000031451(Gas6),ENSMUSG00000037523(Mavs),ENSMUSG00000039521(Foxp3),ENSMUSG00000052336(Cx3cr1),ENSMUSG00000064177(Ghrl),ENSMUSG00000068923(Syt11)
BP	GO:0050870	positive regulation of T cell activation	66	26	92	193	2.85565e-15	1.49954e-13	ENSMUSG00000000409(Lck),ENSMUSG00000000732(Icosl),ENSMUSG00000000791(Il12rb1),ENSMUSG00000001123(Lgals9),ENSMUSG00000001300(Efnb2),ENSMUSG00000004043(Stat5a),ENSMUSG00000004296(Il12b),ENSMUSG00000004709(Cd244a),ENSMUSG00000007655(Cav1),ENSMUSG00000015316(Slamf1),ENSMUSG00000015396(Cd83),ENSMUSG00000016206(H2-M3),ENSMUSG00000016496(Cd274),ENSMUSG00000018899(Irf1),ENSMUSG00000019982(Myb),ENSMUSG000…	ENSMUSG00000000869(Il4),ENSMUSG00000003882(Il7r),ENSMUSG00000016493(Cd46),ENSMUSG00000017697(Ada),ENSMUSG00000020399(Havcr2),ENSMUSG00000021756(Il6st),ENSMUSG00000024978(Gpam),ENSMUSG00000026012(Cd28),ENSMUSG00000026117(Zap70),ENSMUSG00000027239(Mdk),ENSMUSG00000027843(Ptpn22),ENSMUSG00000029204(Rhoh),ENSMUSG00000029657(Hsph1),ENSMUSG00000029869(Ephb6),ENSMUSG00000030528(Blm),ENSMUSG00000031077(F…
BP	GO:1902680	positive regulation of RNA biosynthetic process	266	222	488	1623	2.92077e-15	1.52885e-13	ENSMUSG00000000078(Klf6),ENSMUSG00000000247(Lhx2),ENSMUSG00000000275(Trim25),ENSMUSG00000000532(Acvr1b),ENSMUSG00000000568(Hnrnpd),ENSMUSG00000000708(Kat2b),ENSMUSG00000000982(Ccl3),ENSMUSG00000001288(Rarg),ENSMUSG00000001542(Ell2),ENSMUSG00000001627(Ifrd1),ENSMUSG00000001632(Brpf1),ENSMUSG00000001785(Pwp1),ENSMUSG00000002111(Spi1),ENSMUSG00000002307(Daxx),ENSMUSG00000002578(Ikzf4),ENSMUSG0000000…	ENSMUSG00000000440(Pparg),ENSMUSG00000000869(Il4),ENSMUSG00000001419(Mef2d),ENSMUSG00000001761(Smo),ENSMUSG00000002409(Dyrk1b),ENSMUSG00000002617(Zfp40),ENSMUSG00000002625(Akap8l),ENSMUSG00000002968(Med25),ENSMUSG00000003190(Bcl2l12),ENSMUSG00000003282(Plag1),ENSMUSG00000003575(Crtc1),ENSMUSG00000003992(Ssbp2),ENSMUSG00000004151(Etv1),ENSMUSG00000005534(Insr),ENSMUSG00000005583(Mef2c),ENSMUSG0000…
BP	GO:0002819	regulation of adaptive immune response	58	26	84	170	3.34583e-15	1.74578e-13	ENSMUSG00000000791(Il12rb1),ENSMUSG00000004266(Ptpn6),ENSMUSG00000004296(Il12b),ENSMUSG00000015316(Slamf1),ENSMUSG00000015355(Cd48),ENSMUSG00000015947(Fcgr1),ENSMUSG00000016206(H2-M3),ENSMUSG00000016496(Cd274),ENSMUSG00000017652(Cd40),ENSMUSG00000018899(Irf1),ENSMUSG00000019850(Tnfaip3),ENSMUSG00000020641(Rsad2),ENSMUSG00000022508(Bcl6),ENSMUSG00000022876(Samsn1),ENSMUSG00000024164(C3),ENSMUSG000…	ENSMUSG00000000869(Il4),ENSMUSG00000003882(Il7r),ENSMUSG00000005102(Eif2ak4),ENSMUSG00000005583(Mef2c),ENSMUSG00000017550(Atad5),ENSMUSG00000017697(Ada),ENSMUSG00000018752(Tnfsfm13),ENSMUSG00000020399(Havcr2),ENSMUSG00000024151(Msh2),ENSMUSG00000025880(Smad7),ENSMUSG00000026012(Cd28),ENSMUSG00000026471(Mr1),ENSMUSG00000029468(P2rx7),ENSMUSG00000030051(Aplf),ENSMUSG00000031077(Fadd),ENSMUSG0000003…
BP	GO:0120036	plasma membrane bounded cell projection organization	217	246	463	1527	3.54038e-15	1.84144e-13	ENSMUSG00000000247(Lhx2),ENSMUSG00000000708(Kat2b),ENSMUSG00000001052(Sec24b),ENSMUSG00000001300(Efnb2),ENSMUSG00000001627(Ifrd1),ENSMUSG00000001786(Fbxo7),ENSMUSG00000002227(Mov10),ENSMUSG00000002413(Braf),ENSMUSG00000003070(Efna2),ENSMUSG00000003269(Cyth2),ENSMUSG00000004771(Rab11a),ENSMUSG00000004936(Map2k1),ENSMUSG00000005087(Cd44),ENSMUSG00000005610(Eif4g2),ENSMUSG00000005732(Ranbp1),ENSMUSG…	ENSMUSG00000001227(Sema6b),ENSMUSG00000001482(Def8),ENSMUSG00000001761(Smo),ENSMUSG00000001827(Folr1),ENSMUSG00000002031(Ift46),ENSMUSG00000002274(Metrn),ENSMUSG00000002486(Tchp),ENSMUSG00000003575(Crtc1),ENSMUSG00000004151(Etv1),ENSMUSG00000004530(Coro1c),ENSMUSG00000004768(Rab23),ENSMUSG00000004798(Ulk2),ENSMUSG00000005102(Eif2ak4),ENSMUSG00000005534(Insr),ENSMUSG00000005583(Mef2c),ENSMUSG00000…
BP	GO:0051254	positive regulation of RNA metabolic process	281	231	512	1720	4.04234e-15	2.09589e-13	ENSMUSG00000000078(Klf6),ENSMUSG00000000247(Lhx2),ENSMUSG00000000275(Trim25),ENSMUSG00000000532(Acvr1b),ENSMUSG00000000568(Hnrnpd),ENSMUSG00000000708(Kat2b),ENSMUSG00000000982(Ccl3),ENSMUSG00000001288(Rarg),ENSMUSG00000001542(Ell2),ENSMUSG00000001627(Ifrd1),ENSMUSG00000001632(Brpf1),ENSMUSG00000001785(Pwp1),ENSMUSG00000002111(Spi1),ENSMUSG00000002227(Mov10),ENSMUSG00000002307(Daxx),ENSMUSG0000000…	ENSMUSG00000000440(Pparg),ENSMUSG00000000869(Il4),ENSMUSG00000001419(Mef2d),ENSMUSG00000001761(Smo),ENSMUSG00000002409(Dyrk1b),ENSMUSG00000002617(Zfp40),ENSMUSG00000002625(Akap8l),ENSMUSG00000002968(Med25),ENSMUSG00000003190(Bcl2l12),ENSMUSG00000003282(Plag1),ENSMUSG00000003575(Crtc1),ENSMUSG00000003992(Ssbp2),ENSMUSG00000004151(Etv1),ENSMUSG00000005198(Polr2a),ENSMUSG00000005534(Insr),ENSMUSG000…
CC	GO:0031982	vesicle	342	248	590	2040	4.07579e-15	2.10659e-13	ENSMUSG00000000001(Gnai3),ENSMUSG00000000409(Lck),ENSMUSG00000000555(Itga5),ENSMUSG00000000915(Hip1r),ENSMUSG00000000957(Mmp14),ENSMUSG00000001052(Sec24b),ENSMUSG00000001175(Calm1),ENSMUSG00000001248(Gramd1a),ENSMUSG00000002103(Acp2),ENSMUSG00000002233(Rhoc),ENSMUSG00000002847(Pla1a),ENSMUSG00000003283(Hck),ENSMUSG00000003746(Man1a),ENSMUSG00000003863(Ppfia3),ENSMUSG00000003948(Mmd),ENSMUSG000000…	ENSMUSG00000000631(Myo18a),ENSMUSG00000001036(Epn2),ENSMUSG00000001053(N4bp3),ENSMUSG00000001143(Lman2l),ENSMUSG00000001228(Uhrf1),ENSMUSG00000001751(Naglu),ENSMUSG00000001761(Smo),ENSMUSG00000001827(Folr1),ENSMUSG00000001865(Cpa3),ENSMUSG00000001930(Vwf),ENSMUSG00000002910(Arrdc2),ENSMUSG00000003153(Slc2a3),ENSMUSG00000003346(Abhd17a),ENSMUSG00000003452(Bicd1),ENSMUSG00000004071(Cdip1),ENSMUSG00…
BP	GO:0045893	positive regulation of transcription, DNA-templated	265	222	487	1622	4.12302e-15	2.11769e-13	ENSMUSG00000000078(Klf6),ENSMUSG00000000247(Lhx2),ENSMUSG00000000275(Trim25),ENSMUSG00000000532(Acvr1b),ENSMUSG00000000568(Hnrnpd),ENSMUSG00000000708(Kat2b),ENSMUSG00000000982(Ccl3),ENSMUSG00000001288(Rarg),ENSMUSG00000001542(Ell2),ENSMUSG00000001627(Ifrd1),ENSMUSG00000001632(Brpf1),ENSMUSG00000001785(Pwp1),ENSMUSG00000002111(Spi1),ENSMUSG00000002307(Daxx),ENSMUSG00000002578(Ikzf4),ENSMUSG0000000…	ENSMUSG00000000440(Pparg),ENSMUSG00000000869(Il4),ENSMUSG00000001419(Mef2d),ENSMUSG00000001761(Smo),ENSMUSG00000002409(Dyrk1b),ENSMUSG00000002617(Zfp40),ENSMUSG00000002625(Akap8l),ENSMUSG00000002968(Med25),ENSMUSG00000003190(Bcl2l12),ENSMUSG00000003282(Plag1),ENSMUSG00000003575(Crtc1),ENSMUSG00000003992(Ssbp2),ENSMUSG00000004151(Etv1),ENSMUSG00000005534(Insr),ENSMUSG00000005583(Mef2c),ENSMUSG0000…
BP	GO:1903508	positive regulation of nucleic acid-templated transcription	265	222	487	1622	4.12302e-15	2.11769e-13	ENSMUSG00000000078(Klf6),ENSMUSG00000000247(Lhx2),ENSMUSG00000000275(Trim25),ENSMUSG00000000532(Acvr1b),ENSMUSG00000000568(Hnrnpd),ENSMUSG00000000708(Kat2b),ENSMUSG00000000982(Ccl3),ENSMUSG00000001288(Rarg),ENSMUSG00000001542(Ell2),ENSMUSG00000001627(Ifrd1),ENSMUSG00000001632(Brpf1),ENSMUSG00000001785(Pwp1),ENSMUSG00000002111(Spi1),ENSMUSG00000002307(Daxx),ENSMUSG00000002578(Ikzf4),ENSMUSG0000000…	ENSMUSG00000000440(Pparg),ENSMUSG00000000869(Il4),ENSMUSG00000001419(Mef2d),ENSMUSG00000001761(Smo),ENSMUSG00000002409(Dyrk1b),ENSMUSG00000002617(Zfp40),ENSMUSG00000002625(Akap8l),ENSMUSG00000002968(Med25),ENSMUSG00000003190(Bcl2l12),ENSMUSG00000003282(Plag1),ENSMUSG00000003575(Crtc1),ENSMUSG00000003992(Ssbp2),ENSMUSG00000004151(Etv1),ENSMUSG00000005534(Insr),ENSMUSG00000005583(Mef2c),ENSMUSG0000…
BP	GO:0070925	organelle assembly	119	157	276	820	4.60614e-15	2.35846e-13	ENSMUSG00000000708(Kat2b),ENSMUSG00000001440(Kpnb1),ENSMUSG00000002812(Flii),ENSMUSG00000002845(Tmem39a),ENSMUSG00000003283(Hck),ENSMUSG00000004451(Ralb),ENSMUSG00000004771(Rab11a),ENSMUSG00000005103(Wdr1),ENSMUSG00000005312(Ubqln1),ENSMUSG00000006005(Tpr),ENSMUSG00000008892(Vdac3),ENSMUSG00000017009(Sdc4),ENSMUSG00000018040(Rrp7a),ENSMUSG00000018171(Vmp1),ENSMUSG00000018583(G3bp1),ENSMUSG0000001…	ENSMUSG00000002031(Ift46),ENSMUSG00000002055(Spag5),ENSMUSG00000002486(Tchp),ENSMUSG00000003452(Bicd1),ENSMUSG00000004768(Rab23),ENSMUSG00000005583(Mef2c),ENSMUSG00000006435(Neurl1a),ENSMUSG00000006464(Bbs1),ENSMUSG00000010057(Nprl2),ENSMUSG00000011832(Evi5l),ENSMUSG00000012609(Ttll5),ENSMUSG00000013236(Ptprs),ENSMUSG00000013495(Tmem175),ENSMUSG00000014232(Cluap1),ENSMUSG00000017716(Birc5),ENSMUS…
BP	GO:0007049	cell cycle	238	267	505	1695	5.41397e-15	2.76348e-13	ENSMUSG00000000001(Gnai3),ENSMUSG00000000184(Ccnd2),ENSMUSG00000000532(Acvr1b),ENSMUSG00000000708(Kat2b),ENSMUSG00000000730(Dnmt3l),ENSMUSG00000001175(Calm1),ENSMUSG00000001440(Kpnb1),ENSMUSG00000001473(Tubb6),ENSMUSG00000001786(Fbxo7),ENSMUSG00000002233(Rhoc),ENSMUSG00000003119(Cdk12),ENSMUSG00000004040(Stat3),ENSMUSG00000004043(Stat5a),ENSMUSG00000004085(Map3k20),ENSMUSG00000004266(Ptpn6),ENSMU…	ENSMUSG00000000028(Cdc45),ENSMUSG00000000282(Mnt),ENSMUSG00000000751(Rpa1),ENSMUSG00000001228(Uhrf1),ENSMUSG00000002055(Spag5),ENSMUSG00000002625(Akap8l),ENSMUSG00000002835(Chaf1a),ENSMUSG00000002870(Mcm2),ENSMUSG00000002871(Tpra1),ENSMUSG00000002968(Med25),ENSMUSG00000003518(Dusp3),ENSMUSG00000005102(Eif2ak4),ENSMUSG00000005370(Msh6),ENSMUSG00000005469(Prkaca),ENSMUSG00000005534(Insr),ENSMUSG000…
BP	GO:0030155	regulation of cell adhesion	161	83	244	705	5.68533e-15	2.89301e-13	ENSMUSG00000000409(Lck),ENSMUSG00000000555(Itga5),ENSMUSG00000000732(Icosl),ENSMUSG00000000791(Il12rb1),ENSMUSG00000000957(Mmp14),ENSMUSG00000001123(Lgals9),ENSMUSG00000001300(Efnb2),ENSMUSG00000001768(Rin2),ENSMUSG00000002413(Braf),ENSMUSG00000003269(Cyth2),ENSMUSG00000004043(Stat5a),ENSMUSG00000004266(Ptpn6),ENSMUSG00000004296(Il12b),ENSMUSG00000004709(Cd244a),ENSMUSG00000004936(Map2k1),ENSMUSG…	ENSMUSG00000000869(Il4),ENSMUSG00000003518(Dusp3),ENSMUSG00000003882(Il7r),ENSMUSG00000004530(Coro1c),ENSMUSG00000005958(Ephb3),ENSMUSG00000010051(Hyal1),ENSMUSG00000013707(Tnfaip8l2),ENSMUSG00000014158(Trpv4),ENSMUSG00000016493(Cd46),ENSMUSG00000017697(Ada),ENSMUSG00000020032(Nuak1),ENSMUSG00000020319(Wdpcp),ENSMUSG00000020399(Havcr2),ENSMUSG00000020689(Itgb3),ENSMUSG00000021365(Nedd9),ENSMUSG00…
BP	GO:0050671	positive regulation of lymphocyte proliferation	45	24	69	129	6.00274e-15	3.04509e-13	ENSMUSG00000000732(Icosl),ENSMUSG00000000791(Il12rb1),ENSMUSG00000004043(Stat5a),ENSMUSG00000004296(Il12b),ENSMUSG00000004709(Cd244a),ENSMUSG00000015316(Slamf1),ENSMUSG00000016496(Cd274),ENSMUSG00000017652(Cd40),ENSMUSG00000020134(Peli1),ENSMUSG00000021457(Syk),ENSMUSG00000022508(Bcl6),ENSMUSG00000022901(Cd86),ENSMUSG00000023067(Cdkn1a),ENSMUSG00000024397(Aif1),ENSMUSG00000024610(Cd74),ENSMUSG000…	ENSMUSG00000000869(Il4),ENSMUSG00000002308(Cd320),ENSMUSG00000005583(Mef2c),ENSMUSG00000016493(Cd46),ENSMUSG00000017550(Atad5),ENSMUSG00000017697(Ada),ENSMUSG00000020167(Tcf3),ENSMUSG00000020399(Havcr2),ENSMUSG00000021756(Il6st),ENSMUSG00000024978(Gpam),ENSMUSG00000026012(Cd28),ENSMUSG00000026117(Zap70),ENSMUSG00000027544(Nfatc2),ENSMUSG00000027843(Ptpn22),ENSMUSG00000030528(Blm),ENSMUSG000000310…
BP	GO:0032944	regulation of mononuclear cell proliferation	69	31	100	219	6.18861e-15	3.12972e-13	ENSMUSG00000000732(Icosl),ENSMUSG00000000791(Il12rb1),ENSMUSG00000001123(Lgals9),ENSMUSG00000004043(Stat5a),ENSMUSG00000004266(Ptpn6),ENSMUSG00000004296(Il12b),ENSMUSG00000004709(Cd244a),ENSMUSG00000014599(Csf1),ENSMUSG00000015316(Slamf1),ENSMUSG00000016206(H2-M3),ENSMUSG00000016496(Cd274),ENSMUSG00000016529(Il10),ENSMUSG00000017009(Sdc4),ENSMUSG00000017652(Cd40),ENSMUSG00000018899(Irf1),ENSMUSG0…	ENSMUSG00000000869(Il4),ENSMUSG00000002308(Cd320),ENSMUSG00000005583(Mef2c),ENSMUSG00000016493(Cd46),ENSMUSG00000017550(Atad5),ENSMUSG00000017697(Ada),ENSMUSG00000020167(Tcf3),ENSMUSG00000020399(Havcr2),ENSMUSG00000021756(Il6st),ENSMUSG00000022885(St6gal1),ENSMUSG00000023915(Tnfrsf21),ENSMUSG00000024978(Gpam),ENSMUSG00000026012(Cd28),ENSMUSG00000026117(Zap70),ENSMUSG00000026288(Inpp5d),ENSMUSG000…
BP	GO:0043122	regulation of I-kappaB kinase/NF-kappaB signaling	73	20	93	198	6.38863e-15	3.22097e-13	ENSMUSG00000000275(Trim25),ENSMUSG00000004221(Ikbkg),ENSMUSG00000015755(Tab2),ENSMUSG00000015837(Sqstm1),ENSMUSG00000017652(Cd40),ENSMUSG00000019842(Traf3ip2),ENSMUSG00000019850(Tnfaip3),ENSMUSG00000020075(Ddx21),ENSMUSG00000020115(Tbk1),ENSMUSG00000020134(Peli1),ENSMUSG00000020275(Rel),ENSMUSG00000020400(Tnip1),ENSMUSG00000022026(Olfm4),ENSMUSG00000022255(Mtdh),ENSMUSG00000024401(Tnf),ENSMUSG000…	ENSMUSG00000008305(Tle1),ENSMUSG00000020889(Nr1d1),ENSMUSG00000022178(Ajuba),ENSMUSG00000023826(Prkn),ENSMUSG00000025507(Pidd1),ENSMUSG00000025736(Jmjd8),ENSMUSG00000026228(Htr2b),ENSMUSG00000026842(Abl1),ENSMUSG00000028756(Pink1),ENSMUSG00000029204(Rhoh),ENSMUSG00000031077(Fadd),ENSMUSG00000032109(Nlrx1),ENSMUSG00000032238(Rora),ENSMUSG00000033430(Terf2ip),ENSMUSG00000034317(Trim59),ENSMUSG00000…
BP	GO:0002449	lymphocyte mediated immunity	79	29	108	244	7.23366e-15	3.63585e-13	ENSMUSG00000000732(Icosl),ENSMUSG00000001123(Lgals9),ENSMUSG00000004043(Stat5a),ENSMUSG00000004266(Ptpn6),ENSMUSG00000004296(Il12b),ENSMUSG00000015316(Slamf1),ENSMUSG00000015437(Gzmb),ENSMUSG00000015947(Fcgr1),ENSMUSG00000016206(H2-M3),ENSMUSG00000017652(Cd40),ENSMUSG00000017776(Crk),ENSMUSG00000020437(Myo1g),ENSMUSG00000020641(Rsad2),ENSMUSG00000021948(Prkcd),ENSMUSG00000022508(Bcl6),ENSMUSG0000…	ENSMUSG00000000869(Il4),ENSMUSG00000003882(Il7r),ENSMUSG00000005370(Msh6),ENSMUSG00000016493(Cd46),ENSMUSG00000017550(Atad5),ENSMUSG00000018752(Tnfsfm13),ENSMUSG00000019726(Lyst),ENSMUSG00000020399(Havcr2),ENSMUSG00000024151(Msh2),ENSMUSG00000025880(Smad7),ENSMUSG00000026012(Cd28),ENSMUSG00000026288(Inpp5d),ENSMUSG00000026471(Mr1),ENSMUSG00000029468(P2rx7),ENSMUSG00000029591(Ung),ENSMUSG000000298…
BP	GO:0051094	positive regulation of developmental process	275	184	459	1518	7.87019e-15	3.94374e-13	ENSMUSG00000000409(Lck),ENSMUSG00000000532(Acvr1b),ENSMUSG00000000555(Itga5),ENSMUSG00000000628(Hk2),ENSMUSG00000000708(Kat2b),ENSMUSG00000000957(Mmp14),ENSMUSG00000000982(Ccl3),ENSMUSG00000001123(Lgals9),ENSMUSG00000001300(Efnb2),ENSMUSG00000001707(Eef1e1),ENSMUSG00000001768(Rin2),ENSMUSG00000001785(Pwp1),ENSMUSG00000002413(Braf),ENSMUSG00000002602(Axl),ENSMUSG00000003948(Mmd),ENSMUSG00000004040…	ENSMUSG00000000440(Pparg),ENSMUSG00000000869(Il4),ENSMUSG00000001761(Smo),ENSMUSG00000002274(Metrn),ENSMUSG00000003282(Plag1),ENSMUSG00000003575(Crtc1),ENSMUSG00000003882(Il7r),ENSMUSG00000004530(Coro1c),ENSMUSG00000005514(Por),ENSMUSG00000005534(Insr),ENSMUSG00000005583(Mef2c),ENSMUSG00000005893(Nr2c2),ENSMUSG00000005958(Ephb3),ENSMUSG00000006235(Epor),ENSMUSG00000006435(Neurl1a),ENSMUSG00000007…
BP	GO:0048514	blood vessel morphogenesis	135	85	220	621	8.02699e-15	4.01008e-13	ENSMUSG00000000555(Itga5),ENSMUSG00000000600(Krit1),ENSMUSG00000000628(Hk2),ENSMUSG00000000957(Mmp14),ENSMUSG00000001052(Sec24b),ENSMUSG00000001098(Kctd10),ENSMUSG00000001300(Efnb2),ENSMUSG00000001435(Col18a1),ENSMUSG00000001632(Brpf1),ENSMUSG00000001768(Rin2),ENSMUSG00000002111(Spi1),ENSMUSG00000004040(Stat3),ENSMUSG00000004296(Il12b),ENSMUSG00000005413(Hmox1),ENSMUSG00000007655(Cav1),ENSMUSG000…	ENSMUSG00000000440(Pparg),ENSMUSG00000001036(Epn2),ENSMUSG00000001761(Smo),ENSMUSG00000001827(Folr1),ENSMUSG00000002289(Angptl4),ENSMUSG00000004105(Angptl2),ENSMUSG00000004565(Pnpla6),ENSMUSG00000005958(Ephb3),ENSMUSG00000006235(Epor),ENSMUSG00000007613(Tgfbr1),ENSMUSG00000008855(Hdac5),ENSMUSG00000009621(Vav2),ENSMUSG00000010051(Hyal1),ENSMUSG00000015846(Rxra),ENSMUSG00000016933(Plcg1),ENSMUSG00…
BP	GO:0050794	regulation of cellular process	1528	1309	2837	11837	8.09119e-15	4.0299e-13	ENSMUSG00000000001(Gnai3),ENSMUSG00000000078(Klf6),ENSMUSG00000000184(Ccnd2),ENSMUSG00000000247(Lhx2),ENSMUSG00000000248(Clec2g),ENSMUSG00000000275(Trim25),ENSMUSG00000000409(Lck),ENSMUSG00000000532(Acvr1b),ENSMUSG00000000555(Itga5),ENSMUSG00000000568(Hnrnpd),ENSMUSG00000000600(Krit1),ENSMUSG00000000628(Hk2),ENSMUSG00000000708(Kat2b),ENSMUSG00000000730(Dnmt3l),ENSMUSG00000000732(Icosl),ENSMUSG000…	ENSMUSG00000000028(Cdc45),ENSMUSG00000000149(Gna12),ENSMUSG00000000282(Mnt),ENSMUSG00000000326(Comt),ENSMUSG00000000440(Pparg),ENSMUSG00000000631(Myo18a),ENSMUSG00000000751(Rpa1),ENSMUSG00000000869(Il4),ENSMUSG00000001036(Epn2),ENSMUSG00000001120(Pcbp3),ENSMUSG00000001227(Sema6b),ENSMUSG00000001228(Uhrf1),ENSMUSG00000001366(Fbxo9),ENSMUSG00000001419(Mef2d),ENSMUSG00000001482(Def8),ENSMUSG00000001…
BP	GO:0045619	regulation of lymphocyte differentiation	60	26	86	178	8.47838e-15	4.20999e-13	ENSMUSG00000000409(Lck),ENSMUSG00000000957(Mmp14),ENSMUSG00000001123(Lgals9),ENSMUSG00000001786(Fbxo7),ENSMUSG00000002413(Braf),ENSMUSG00000002602(Axl),ENSMUSG00000004043(Stat5a),ENSMUSG00000004266(Ptpn6),ENSMUSG00000015396(Cd83),ENSMUSG00000016206(H2-M3),ENSMUSG00000016529(Il10),ENSMUSG00000018899(Irf1),ENSMUSG00000019982(Myb),ENSMUSG00000021270(Hsp90aa1),ENSMUSG00000021457(Syk),ENSMUSG000000216…	ENSMUSG00000000869(Il4),ENSMUSG00000003882(Il7r),ENSMUSG00000016493(Cd46),ENSMUSG00000017697(Ada),ENSMUSG00000021127(Zfp36l1),ENSMUSG00000022672(Prkdc),ENSMUSG00000025880(Smad7),ENSMUSG00000026012(Cd28),ENSMUSG00000026117(Zap70),ENSMUSG00000026288(Inpp5d),ENSMUSG00000026842(Abl1),ENSMUSG00000027239(Mdk),ENSMUSG00000027387(Zc3h8),ENSMUSG00000029204(Rhoh),ENSMUSG00000031101(Sash3),ENSMUSG0000003145…
BP	GO:0001568	blood vessel development	147	99	246	715	9.43277e-15	4.66979e-13	ENSMUSG00000000555(Itga5),ENSMUSG00000000600(Krit1),ENSMUSG00000000628(Hk2),ENSMUSG00000000957(Mmp14),ENSMUSG00000001052(Sec24b),ENSMUSG00000001089(Luzp1),ENSMUSG00000001098(Kctd10),ENSMUSG00000001300(Efnb2),ENSMUSG00000001435(Col18a1),ENSMUSG00000001632(Brpf1),ENSMUSG00000001768(Rin2),ENSMUSG00000002111(Spi1),ENSMUSG00000004040(Stat3),ENSMUSG00000004296(Il12b),ENSMUSG00000004936(Map2k1),ENSMUSG0…	ENSMUSG00000000440(Pparg),ENSMUSG00000001036(Epn2),ENSMUSG00000001761(Smo),ENSMUSG00000001827(Folr1),ENSMUSG00000002289(Angptl4),ENSMUSG00000004105(Angptl2),ENSMUSG00000004565(Pnpla6),ENSMUSG00000005583(Mef2c),ENSMUSG00000005958(Ephb3),ENSMUSG00000006235(Epor),ENSMUSG00000007613(Tgfbr1),ENSMUSG00000008855(Hdac5),ENSMUSG00000009621(Vav2),ENSMUSG00000010051(Hyal1),ENSMUSG00000015846(Rxra),ENSMUSG00…
BP	GO:0051347	positive regulation of transferase activity	139	82	221	626	1.06346e-14	5.24895e-13	ENSMUSG00000000184(Ccnd2),ENSMUSG00000000568(Hnrnpd),ENSMUSG00000001123(Lgals9),ENSMUSG00000002307(Daxx),ENSMUSG00000002413(Braf),ENSMUSG00000002602(Axl),ENSMUSG00000002699(Lcp2),ENSMUSG00000003226(Ranbp2),ENSMUSG00000003948(Mmd),ENSMUSG00000004085(Map3k20),ENSMUSG00000004221(Ikbkg),ENSMUSG00000004296(Il12b),ENSMUSG00000004451(Ralb),ENSMUSG00000004936(Map2k1),ENSMUSG00000006134(Crkl),ENSMUSG00000…	ENSMUSG00000000869(Il4),ENSMUSG00000005534(Insr),ENSMUSG00000005583(Mef2c),ENSMUSG00000005958(Ephb3),ENSMUSG00000006435(Neurl1a),ENSMUSG00000007613(Tgfbr1),ENSMUSG00000009621(Vav2),ENSMUSG00000014426(Map3k4),ENSMUSG00000016349(Eef1a2),ENSMUSG00000016984(Etaa1),ENSMUSG00000018909(Arrb1),ENSMUSG00000020167(Tcf3),ENSMUSG00000020312(Shc2),ENSMUSG00000020541(Tom1l1),ENSMUSG00000020689(Itgb3),ENSMUSG00…
CC	GO:0110165	cellular anatomical entity	2163	2180	4343	19288	1.11351e-14	5.47953e-13	ENSMUSG00000000001(Gnai3),ENSMUSG00000000078(Klf6),ENSMUSG00000000184(Ccnd2),ENSMUSG00000000247(Lhx2),ENSMUSG00000000248(Clec2g),ENSMUSG00000000275(Trim25),ENSMUSG00000000385(Tmprss2),ENSMUSG00000000409(Lck),ENSMUSG00000000532(Acvr1b),ENSMUSG00000000555(Itga5),ENSMUSG00000000568(Hnrnpd),ENSMUSG00000000600(Krit1),ENSMUSG00000000628(Hk2),ENSMUSG00000000682(Cd52),ENSMUSG00000000708(Kat2b),ENSMUSG000…	ENSMUSG00000000028(Cdc45),ENSMUSG00000000056(Narf),ENSMUSG00000000149(Gna12),ENSMUSG00000000282(Mnt),ENSMUSG00000000326(Comt),ENSMUSG00000000440(Pparg),ENSMUSG00000000631(Myo18a),ENSMUSG00000000673(Haao),ENSMUSG00000000686(Abhd15),ENSMUSG00000000751(Rpa1),ENSMUSG00000000823(Zfp512b),ENSMUSG00000000869(Il4),ENSMUSG00000000876(Pxmp4),ENSMUSG00000000884(Gnb1l),ENSMUSG00000001036(Epn2),ENSMUSG0000000…
BP	GO:2000113	negative regulation of cellular macromolecule biosynthetic process	235	235	470	1564	1.13051e-14	5.51766e-13	ENSMUSG00000000568(Hnrnpd),ENSMUSG00000000730(Dnmt3l),ENSMUSG00000000838(Fmr1),ENSMUSG00000001156(Mxd1),ENSMUSG00000001288(Rarg),ENSMUSG00000002111(Spi1),ENSMUSG00000002227(Mov10),ENSMUSG00000002307(Daxx),ENSMUSG00000002578(Ikzf4),ENSMUSG00000002881(Nab1),ENSMUSG00000002983(Relb),ENSMUSG00000003382(Etv3),ENSMUSG00000004040(Stat3),ENSMUSG00000004364(Cul3),ENSMUSG00000005774(Rfx5),ENSMUSG0000000600…	ENSMUSG00000000028(Cdc45),ENSMUSG00000000282(Mnt),ENSMUSG00000000440(Pparg),ENSMUSG00000000869(Il4),ENSMUSG00000001120(Pcbp3),ENSMUSG00000001228(Uhrf1),ENSMUSG00000001761(Smo),ENSMUSG00000002968(Med25),ENSMUSG00000004099(Dnmt1),ENSMUSG00000005045(Chd5),ENSMUSG00000005102(Eif2ak4),ENSMUSG00000005583(Mef2c),ENSMUSG00000005718(Tfap4),ENSMUSG00000005893(Nr2c2),ENSMUSG00000006362(Cbfa2t3),ENSMUSG00000…
BP	GO:0001944	vasculature development	151	103	254	745	1.13133e-14	5.51766e-13	ENSMUSG00000000555(Itga5),ENSMUSG00000000600(Krit1),ENSMUSG00000000628(Hk2),ENSMUSG00000000957(Mmp14),ENSMUSG00000001052(Sec24b),ENSMUSG00000001089(Luzp1),ENSMUSG00000001098(Kctd10),ENSMUSG00000001300(Efnb2),ENSMUSG00000001435(Col18a1),ENSMUSG00000001632(Brpf1),ENSMUSG00000001768(Rin2),ENSMUSG00000002111(Spi1),ENSMUSG00000004040(Stat3),ENSMUSG00000004296(Il12b),ENSMUSG00000004936(Map2k1),ENSMUSG0…	ENSMUSG00000000440(Pparg),ENSMUSG00000001036(Epn2),ENSMUSG00000001761(Smo),ENSMUSG00000001827(Folr1),ENSMUSG00000002289(Angptl4),ENSMUSG00000004099(Dnmt1),ENSMUSG00000004105(Angptl2),ENSMUSG00000004565(Pnpla6),ENSMUSG00000005583(Mef2c),ENSMUSG00000005958(Ephb3),ENSMUSG00000006235(Epor),ENSMUSG00000007613(Tgfbr1),ENSMUSG00000008855(Hdac5),ENSMUSG00000009621(Vav2),ENSMUSG00000010051(Hyal1),ENSMUSG0…
BP	GO:0072358	cardiovascular system development	151	103	254	745	1.13133e-14	5.51766e-13	ENSMUSG00000000555(Itga5),ENSMUSG00000000600(Krit1),ENSMUSG00000000628(Hk2),ENSMUSG00000000957(Mmp14),ENSMUSG00000001052(Sec24b),ENSMUSG00000001089(Luzp1),ENSMUSG00000001098(Kctd10),ENSMUSG00000001300(Efnb2),ENSMUSG00000001435(Col18a1),ENSMUSG00000001632(Brpf1),ENSMUSG00000001768(Rin2),ENSMUSG00000002111(Spi1),ENSMUSG00000004040(Stat3),ENSMUSG00000004296(Il12b),ENSMUSG00000004936(Map2k1),ENSMUSG0…	ENSMUSG00000000440(Pparg),ENSMUSG00000001036(Epn2),ENSMUSG00000001761(Smo),ENSMUSG00000001827(Folr1),ENSMUSG00000002289(Angptl4),ENSMUSG00000004099(Dnmt1),ENSMUSG00000004105(Angptl2),ENSMUSG00000004565(Pnpla6),ENSMUSG00000005583(Mef2c),ENSMUSG00000005958(Ephb3),ENSMUSG00000006235(Epor),ENSMUSG00000007613(Tgfbr1),ENSMUSG00000008855(Hdac5),ENSMUSG00000009621(Vav2),ENSMUSG00000010051(Hyal1),ENSMUSG0…
BP	GO:0045785	positive regulation of cell adhesion	112	49	161	418	1.16867e-14	5.68293e-13	ENSMUSG00000000409(Lck),ENSMUSG00000000555(Itga5),ENSMUSG00000000732(Icosl),ENSMUSG00000000791(Il12rb1),ENSMUSG00000001123(Lgals9),ENSMUSG00000001300(Efnb2),ENSMUSG00000001768(Rin2),ENSMUSG00000002413(Braf),ENSMUSG00000004043(Stat5a),ENSMUSG00000004266(Ptpn6),ENSMUSG00000004296(Il12b),ENSMUSG00000004709(Cd244a),ENSMUSG00000005087(Cd44),ENSMUSG00000006134(Crkl),ENSMUSG00000007655(Cav1),ENSMUSG0000…	ENSMUSG00000000869(Il4),ENSMUSG00000003882(Il7r),ENSMUSG00000010051(Hyal1),ENSMUSG00000016493(Cd46),ENSMUSG00000017697(Ada),ENSMUSG00000020399(Havcr2),ENSMUSG00000020689(Itgb3),ENSMUSG00000021365(Nedd9),ENSMUSG00000021756(Il6st),ENSMUSG00000022367(Has2),ENSMUSG00000024978(Gpam),ENSMUSG00000025223(Ldb1),ENSMUSG00000025880(Smad7),ENSMUSG00000026012(Cd28),ENSMUSG00000026117(Zap70),ENSMUSG00000026585…
BP	GO:0065007	biological regulation	1658	1442	3100	13067	1.36063e-14	6.59687e-13	ENSMUSG00000000001(Gnai3),ENSMUSG00000000078(Klf6),ENSMUSG00000000184(Ccnd2),ENSMUSG00000000247(Lhx2),ENSMUSG00000000248(Clec2g),ENSMUSG00000000275(Trim25),ENSMUSG00000000385(Tmprss2),ENSMUSG00000000409(Lck),ENSMUSG00000000532(Acvr1b),ENSMUSG00000000555(Itga5),ENSMUSG00000000568(Hnrnpd),ENSMUSG00000000600(Krit1),ENSMUSG00000000628(Hk2),ENSMUSG00000000682(Cd52),ENSMUSG00000000708(Kat2b),ENSMUSG000…	ENSMUSG00000000028(Cdc45),ENSMUSG00000000149(Gna12),ENSMUSG00000000282(Mnt),ENSMUSG00000000326(Comt),ENSMUSG00000000440(Pparg),ENSMUSG00000000631(Myo18a),ENSMUSG00000000673(Haao),ENSMUSG00000000751(Rpa1),ENSMUSG00000000869(Il4),ENSMUSG00000001036(Epn2),ENSMUSG00000001120(Pcbp3),ENSMUSG00000001227(Sema6b),ENSMUSG00000001228(Uhrf1),ENSMUSG00000001366(Fbxo9),ENSMUSG00000001419(Mef2d),ENSMUSG00000001…
BP	GO:0010558	negative regulation of macromolecule biosynthetic process	238	235	473	1578	1.47324e-14	7.1218e-13	ENSMUSG00000000568(Hnrnpd),ENSMUSG00000000730(Dnmt3l),ENSMUSG00000000838(Fmr1),ENSMUSG00000001156(Mxd1),ENSMUSG00000001288(Rarg),ENSMUSG00000002111(Spi1),ENSMUSG00000002227(Mov10),ENSMUSG00000002307(Daxx),ENSMUSG00000002578(Ikzf4),ENSMUSG00000002881(Nab1),ENSMUSG00000002983(Relb),ENSMUSG00000003382(Etv3),ENSMUSG00000004040(Stat3),ENSMUSG00000004364(Cul3),ENSMUSG00000005774(Rfx5),ENSMUSG0000000600…	ENSMUSG00000000028(Cdc45),ENSMUSG00000000282(Mnt),ENSMUSG00000000440(Pparg),ENSMUSG00000000869(Il4),ENSMUSG00000001120(Pcbp3),ENSMUSG00000001228(Uhrf1),ENSMUSG00000001761(Smo),ENSMUSG00000002968(Med25),ENSMUSG00000004099(Dnmt1),ENSMUSG00000005045(Chd5),ENSMUSG00000005102(Eif2ak4),ENSMUSG00000005583(Mef2c),ENSMUSG00000005718(Tfap4),ENSMUSG00000005893(Nr2c2),ENSMUSG00000006362(Cbfa2t3),ENSMUSG00000…
BP	GO:0006914	autophagy	80	81	161	419	1.49023e-14	7.1618e-13	ENSMUSG00000000001(Gnai3),ENSMUSG00000000628(Hk2),ENSMUSG00000001248(Gramd1a),ENSMUSG00000001786(Fbxo7),ENSMUSG00000002845(Tmem39a),ENSMUSG00000003308(Keap1),ENSMUSG00000004040(Stat3),ENSMUSG00000004221(Ikbkg),ENSMUSG00000004446(Bid),ENSMUSG00000004451(Ralb),ENSMUSG00000004936(Map2k1),ENSMUSG00000005312(Ubqln1),ENSMUSG00000005413(Hmox1),ENSMUSG00000005610(Eif4g2),ENSMUSG00000015837(Sqstm1),ENSMUS…	ENSMUSG00000000869(Il4),ENSMUSG00000004567(Mcoln1),ENSMUSG00000004768(Rab23),ENSMUSG00000004798(Ulk2),ENSMUSG00000005102(Eif2ak4),ENSMUSG00000010057(Nprl2),ENSMUSG00000014470(Rnf166),ENSMUSG00000017119(Nbr1),ENSMUSG00000019302(Atp6v0a1),ENSMUSG00000022051(Bnip3l),ENSMUSG00000022750(Klhl22),ENSMUSG00000023826(Prkn),ENSMUSG00000023990(Tfeb),ENSMUSG00000024413(Npc1),ENSMUSG00000024773(Atg2a),ENSMUSG…
BP	GO:0061919	process utilizing autophagic mechanism	80	81	161	419	1.49023e-14	7.1618e-13	ENSMUSG00000000001(Gnai3),ENSMUSG00000000628(Hk2),ENSMUSG00000001248(Gramd1a),ENSMUSG00000001786(Fbxo7),ENSMUSG00000002845(Tmem39a),ENSMUSG00000003308(Keap1),ENSMUSG00000004040(Stat3),ENSMUSG00000004221(Ikbkg),ENSMUSG00000004446(Bid),ENSMUSG00000004451(Ralb),ENSMUSG00000004936(Map2k1),ENSMUSG00000005312(Ubqln1),ENSMUSG00000005413(Hmox1),ENSMUSG00000005610(Eif4g2),ENSMUSG00000015837(Sqstm1),ENSMUS…	ENSMUSG00000000869(Il4),ENSMUSG00000004567(Mcoln1),ENSMUSG00000004768(Rab23),ENSMUSG00000004798(Ulk2),ENSMUSG00000005102(Eif2ak4),ENSMUSG00000010057(Nprl2),ENSMUSG00000014470(Rnf166),ENSMUSG00000017119(Nbr1),ENSMUSG00000019302(Atp6v0a1),ENSMUSG00000022051(Bnip3l),ENSMUSG00000022750(Klhl22),ENSMUSG00000023826(Prkn),ENSMUSG00000023990(Tfeb),ENSMUSG00000024413(Npc1),ENSMUSG00000024773(Atg2a),ENSMUSG…
BP	GO:0071346	cellular response to interferon-gamma	59	6	65	120	1.63369e-14	7.82839e-13	ENSMUSG00000000791(Il12rb1),ENSMUSG00000000982(Ccl3),ENSMUSG00000004296(Il12b),ENSMUSG00000006740(Kif5b),ENSMUSG00000009185(Ccl8),ENSMUSG00000018160(Med1),ENSMUSG00000018899(Irf1),ENSMUSG00000018930(Ccl4),ENSMUSG00000019122(Ccl9),ENSMUSG00000019471(Cdc37),ENSMUSG00000020152(Actr2),ENSMUSG00000020826(Nos2),ENSMUSG00000021367(Edn1),ENSMUSG00000022346(Myc),ENSMUSG00000022504(Ciita),ENSMUSG0000002290…	ENSMUSG00000000440(Pparg),ENSMUSG00000000631(Myo18a),ENSMUSG00000020546(Stxbp4),ENSMUSG00000031988(Vps26b),ENSMUSG00000051343(Rab11fip5),ENSMUSG00000052688(Rab7b)
CC	GO:0097708	intracellular vesicle	320	234	554	1909	1.65547e-14	7.90967e-13	ENSMUSG00000000001(Gnai3),ENSMUSG00000000409(Lck),ENSMUSG00000000555(Itga5),ENSMUSG00000000915(Hip1r),ENSMUSG00000000957(Mmp14),ENSMUSG00000001052(Sec24b),ENSMUSG00000001175(Calm1),ENSMUSG00000001248(Gramd1a),ENSMUSG00000002103(Acp2),ENSMUSG00000002233(Rhoc),ENSMUSG00000002847(Pla1a),ENSMUSG00000003283(Hck),ENSMUSG00000003746(Man1a),ENSMUSG00000003863(Ppfia3),ENSMUSG00000003948(Mmd),ENSMUSG000000…	ENSMUSG00000000631(Myo18a),ENSMUSG00000001036(Epn2),ENSMUSG00000001053(N4bp3),ENSMUSG00000001143(Lman2l),ENSMUSG00000001228(Uhrf1),ENSMUSG00000001761(Smo),ENSMUSG00000001827(Folr1),ENSMUSG00000001865(Cpa3),ENSMUSG00000001930(Vwf),ENSMUSG00000002910(Arrdc2),ENSMUSG00000003153(Slc2a3),ENSMUSG00000003346(Abhd17a),ENSMUSG00000003452(Bicd1),ENSMUSG00000004071(Cdip1),ENSMUSG00000004530(Coro1c),ENSMUSG0…
BP	GO:0033993	response to lipid	219	95	314	969	1.73487e-14	8.26501e-13	ENSMUSG00000000275(Trim25),ENSMUSG00000000568(Hnrnpd),ENSMUSG00000000982(Ccl3),ENSMUSG00000001123(Lgals9),ENSMUSG00000001175(Calm1),ENSMUSG00000001248(Gramd1a),ENSMUSG00000001288(Rarg),ENSMUSG00000001348(Acp5),ENSMUSG00000002307(Daxx),ENSMUSG00000002602(Axl),ENSMUSG00000004040(Stat3),ENSMUSG00000004296(Il12b),ENSMUSG00000004446(Bid),ENSMUSG00000004936(Map2k1),ENSMUSG00000005732(Ranbp1),ENSMUSG000…	ENSMUSG00000000326(Comt),ENSMUSG00000000440(Pparg),ENSMUSG00000001761(Smo),ENSMUSG00000005583(Mef2c),ENSMUSG00000005718(Tfap4),ENSMUSG00000005951(Shpk),ENSMUSG00000006344(Ggt5),ENSMUSG00000006728(Cdk4),ENSMUSG00000007613(Tgfbr1),ENSMUSG00000008855(Hdac5),ENSMUSG00000010663(Fads1),ENSMUSG00000015337(Endog),ENSMUSG00000015846(Rxra),ENSMUSG00000017146(Brca1),ENSMUSG00000020027(Socs2),ENSMUSG00000020…
BP	GO:0031331	positive regulation of cellular catabolic process	93	58	151	386	1.74484e-14	8.28847e-13	ENSMUSG00000000001(Gnai3),ENSMUSG00000000568(Hnrnpd),ENSMUSG00000000628(Hk2),ENSMUSG00000001786(Fbxo7),ENSMUSG00000002227(Mov10),ENSMUSG00000004221(Ikbkg),ENSMUSG00000004446(Bid),ENSMUSG00000004451(Ralb),ENSMUSG00000004936(Map2k1),ENSMUSG00000005312(Ubqln1),ENSMUSG00000005413(Hmox1),ENSMUSG00000007655(Cav1),ENSMUSG00000019471(Cdc37),ENSMUSG00000019850(Tnfaip3),ENSMUSG00000020115(Tbk1),ENSMUSG0000…	ENSMUSG00000000869(Il4),ENSMUSG00000004798(Ulk2),ENSMUSG00000005102(Eif2ak4),ENSMUSG00000005534(Insr),ENSMUSG00000006362(Cbfa2t3),ENSMUSG00000010057(Nprl2),ENSMUSG00000015337(Endog),ENSMUSG00000021127(Zfp36l1),ENSMUSG00000021236(Entpd5),ENSMUSG00000021482(Prxl2c),ENSMUSG00000022051(Bnip3l),ENSMUSG00000022433(Csnk1e),ENSMUSG00000022708(Zbtb20),ENSMUSG00000023019(Gpd1),ENSMUSG00000023826(Prkn),ENSM…
BP	GO:0042592	homeostatic process	300	249	549	1880	1.80327e-14	8.54137e-13	ENSMUSG00000000409(Lck),ENSMUSG00000000532(Acvr1b),ENSMUSG00000000568(Hnrnpd),ENSMUSG00000000600(Krit1),ENSMUSG00000000628(Hk2),ENSMUSG00000000682(Cd52),ENSMUSG00000000982(Ccl3),ENSMUSG00000001175(Calm1),ENSMUSG00000001348(Acp5),ENSMUSG00000001416(Cct3),ENSMUSG00000002105(Slc39a13),ENSMUSG00000002111(Spi1),ENSMUSG00000002602(Axl),ENSMUSG00000003352(Cacnb3),ENSMUSG00000003617(Cp),ENSMUSG0000000404…	ENSMUSG00000000326(Comt),ENSMUSG00000000440(Pparg),ENSMUSG00000000673(Haao),ENSMUSG00000000751(Rpa1),ENSMUSG00000000869(Il4),ENSMUSG00000001482(Def8),ENSMUSG00000001761(Smo),ENSMUSG00000002083(Bbc3),ENSMUSG00000002289(Angptl4),ENSMUSG00000003378(Grik5),ENSMUSG00000003575(Crtc1),ENSMUSG00000003812(Dnase2a),ENSMUSG00000003882(Il7r),ENSMUSG00000004347(Pde1c),ENSMUSG00000004567(Mcoln1),ENSMUSG0000000…
BP	GO:0032675	regulation of interleukin-6 production	54	21	75	148	1.81881e-14	8.59024e-13	ENSMUSG00000001123(Lgals9),ENSMUSG00000002897(Il17ra),ENSMUSG00000004040(Stat3),ENSMUSG00000004266(Ptpn6),ENSMUSG00000008496(Pou2f2),ENSMUSG00000015316(Slamf1),ENSMUSG00000016528(Mapkapk2),ENSMUSG00000016529(Il10),ENSMUSG00000018500(Adora2b),ENSMUSG00000019850(Tnfaip3),ENSMUSG00000020227(Irak3),ENSMUSG00000021457(Syk),ENSMUSG00000022514(Il1rap),ENSMUSG00000022749(Tbc1d23),ENSMUSG00000022892(App),…	ENSMUSG00000001741(Il16),ENSMUSG00000010047(Hyal2),ENSMUSG00000014158(Trpv4),ENSMUSG00000018909(Arrb1),ENSMUSG00000020399(Havcr2),ENSMUSG00000022667(Cd200r1),ENSMUSG00000022708(Zbtb20),ENSMUSG00000026288(Inpp5d),ENSMUSG00000027843(Ptpn22),ENSMUSG00000027947(Il6ra),ENSMUSG00000028864(Hgf),ENSMUSG00000029468(P2rx7),ENSMUSG00000031451(Gas6),ENSMUSG00000032109(Nlrx1),ENSMUSG00000037523(Mavs),ENSMUSG0…
BP	GO:0050670	regulation of lymphocyte proliferation	68	30	98	216	1.90236e-14	8.95907e-13	ENSMUSG00000000732(Icosl),ENSMUSG00000000791(Il12rb1),ENSMUSG00000001123(Lgals9),ENSMUSG00000004043(Stat5a),ENSMUSG00000004266(Ptpn6),ENSMUSG00000004296(Il12b),ENSMUSG00000004709(Cd244a),ENSMUSG00000015316(Slamf1),ENSMUSG00000016206(H2-M3),ENSMUSG00000016496(Cd274),ENSMUSG00000016529(Il10),ENSMUSG00000017009(Sdc4),ENSMUSG00000017652(Cd40),ENSMUSG00000018899(Irf1),ENSMUSG00000020134(Peli1),ENSMUSG…	ENSMUSG00000000869(Il4),ENSMUSG00000002308(Cd320),ENSMUSG00000005583(Mef2c),ENSMUSG00000016493(Cd46),ENSMUSG00000017550(Atad5),ENSMUSG00000017697(Ada),ENSMUSG00000020167(Tcf3),ENSMUSG00000020399(Havcr2),ENSMUSG00000021756(Il6st),ENSMUSG00000023915(Tnfrsf21),ENSMUSG00000024978(Gpam),ENSMUSG00000026012(Cd28),ENSMUSG00000026117(Zap70),ENSMUSG00000026288(Inpp5d),ENSMUSG00000027544(Nfatc2),ENSMUSG0000…
BP	GO:0043087	regulation of GTPase activity	89	74	163	427	1.99948e-14	9.38954e-13	ENSMUSG00000000982(Ccl3),ENSMUSG00000001768(Rin2),ENSMUSG00000003226(Ranbp2),ENSMUSG00000004936(Map2k1),ENSMUSG00000004952(Rasa4),ENSMUSG00000005732(Ranbp1),ENSMUSG00000006134(Crkl),ENSMUSG00000009185(Ccl8),ENSMUSG00000017631(Abr),ENSMUSG00000017652(Cd40),ENSMUSG00000017776(Crk),ENSMUSG00000018736(Ndel1),ENSMUSG00000018930(Ccl4),ENSMUSG00000019122(Ccl9),ENSMUSG00000020121(Srgap1),ENSMUSG000000205…	ENSMUSG00000001995(Sipa1l2),ENSMUSG00000003134(Tbc1d8),ENSMUSG00000004530(Coro1c),ENSMUSG00000004633(Chn2),ENSMUSG00000005958(Ephb3),ENSMUSG00000009621(Vav2),ENSMUSG00000010057(Nprl2),ENSMUSG00000011832(Evi5l),ENSMUSG00000018909(Arrb1),ENSMUSG00000019790(Stxbp5),ENSMUSG00000020021(Fgd6),ENSMUSG00000020888(Dvl2),ENSMUSG00000021013(Ttc8),ENSMUSG00000021365(Nedd9),ENSMUSG00000021368(Tbc1d7),ENSMUSG0…
MF	GO:0016462	pyrophosphatase activity	131	141	272	814	2.02415e-14	9.47834e-13	ENSMUSG00000000001(Gnai3),ENSMUSG00000001473(Tubb6),ENSMUSG00000002227(Mov10),ENSMUSG00000002233(Rhoc),ENSMUSG00000004451(Ralb),ENSMUSG00000004668(Abca13),ENSMUSG00000004771(Rab11a),ENSMUSG00000006740(Kif5b),ENSMUSG00000013662(Atad1),ENSMUSG00000017144(Rnd3),ENSMUSG00000017830(Dhx58),ENSMUSG00000017831(Rab5a),ENSMUSG00000018417(Myo1b),ENSMUSG00000018583(G3bp1),ENSMUSG00000018707(Dync1h1),ENSMUSG0…	ENSMUSG00000000149(Gna12),ENSMUSG00000000631(Myo18a),ENSMUSG00000002346(Slc25a42),ENSMUSG00000002870(Mcm2),ENSMUSG00000004187(Kifc2),ENSMUSG00000004768(Rab23),ENSMUSG00000005045(Chd5),ENSMUSG00000005370(Msh6),ENSMUSG00000006019(Dhx34),ENSMUSG00000007646(Rad51c),ENSMUSG00000010021(Kif19a),ENSMUSG00000011148(Adssl1),ENSMUSG00000015711(Prune1),ENSMUSG00000016349(Eef1a2),ENSMUSG00000017550(Atad5),ENS…
CC	GO:0031410	cytoplasmic vesicle	320	232	552	1904	2.2732e-14	1.06143e-12	ENSMUSG00000000001(Gnai3),ENSMUSG00000000409(Lck),ENSMUSG00000000555(Itga5),ENSMUSG00000000915(Hip1r),ENSMUSG00000000957(Mmp14),ENSMUSG00000001052(Sec24b),ENSMUSG00000001175(Calm1),ENSMUSG00000001248(Gramd1a),ENSMUSG00000002103(Acp2),ENSMUSG00000002233(Rhoc),ENSMUSG00000002847(Pla1a),ENSMUSG00000003283(Hck),ENSMUSG00000003746(Man1a),ENSMUSG00000003863(Ppfia3),ENSMUSG00000003948(Mmd),ENSMUSG000000…	ENSMUSG00000000631(Myo18a),ENSMUSG00000001036(Epn2),ENSMUSG00000001053(N4bp3),ENSMUSG00000001143(Lman2l),ENSMUSG00000001228(Uhrf1),ENSMUSG00000001761(Smo),ENSMUSG00000001827(Folr1),ENSMUSG00000001865(Cpa3),ENSMUSG00000001930(Vwf),ENSMUSG00000002910(Arrdc2),ENSMUSG00000003153(Slc2a3),ENSMUSG00000003346(Abhd17a),ENSMUSG00000003452(Bicd1),ENSMUSG00000004071(Cdip1),ENSMUSG00000004530(Coro1c),ENSMUSG0…
BP	GO:0050900	leukocyte migration	107	34	141	354	2.4257e-14	1.12943e-12	ENSMUSG00000000957(Mmp14),ENSMUSG00000000982(Ccl3),ENSMUSG00000001123(Lgals9),ENSMUSG00000002897(Il17ra),ENSMUSG00000005103(Wdr1),ENSMUSG00000006134(Crkl),ENSMUSG00000009185(Ccl8),ENSMUSG00000011008(Mcoln2),ENSMUSG00000014599(Csf1),ENSMUSG00000015316(Slamf1),ENSMUSG00000017631(Abr),ENSMUSG00000017737(Mmp9),ENSMUSG00000017776(Crk),ENSMUSG00000018920(Cxcl16),ENSMUSG00000018930(Ccl4),ENSMUSG00000019…	ENSMUSG00000000869(Il4),ENSMUSG00000001741(Il16),ENSMUSG00000014158(Trpv4),ENSMUSG00000015766(Eps8),ENSMUSG00000017697(Ada),ENSMUSG00000020689(Itgb3),ENSMUSG00000021508(Cxcl14),ENSMUSG00000021699(Pde4d),ENSMUSG00000022667(Cd200r1),ENSMUSG00000024962(Vegfb),ENSMUSG00000026271(Gpr35),ENSMUSG00000027111(Itga6),ENSMUSG00000027239(Mdk),ENSMUSG00000027843(Ptpn22),ENSMUSG00000028413(B4galt1),ENSMUSG0000…
BP	GO:0045621	positive regulation of lymphocyte differentiation	45	16	61	110	2.48661e-14	1.15452e-12	ENSMUSG00000000409(Lck),ENSMUSG00000000957(Mmp14),ENSMUSG00000001123(Lgals9),ENSMUSG00000002602(Axl),ENSMUSG00000004043(Stat5a),ENSMUSG00000015396(Cd83),ENSMUSG00000016206(H2-M3),ENSMUSG00000016529(Il10),ENSMUSG00000018899(Irf1),ENSMUSG00000019982(Myb),ENSMUSG00000021270(Hsp90aa1),ENSMUSG00000021457(Syk),ENSMUSG00000021686(Ap3b1),ENSMUSG00000022508(Bcl6),ENSMUSG00000023206(Il15ra),ENSMUSG00000024…	ENSMUSG00000000869(Il4),ENSMUSG00000003882(Il7r),ENSMUSG00000016493(Cd46),ENSMUSG00000017697(Ada),ENSMUSG00000022672(Prkdc),ENSMUSG00000026117(Zap70),ENSMUSG00000026288(Inpp5d),ENSMUSG00000027239(Mdk),ENSMUSG00000029204(Rhoh),ENSMUSG00000031101(Sash3),ENSMUSG00000031451(Gas6),ENSMUSG00000032440(Tgfbr2),ENSMUSG00000039521(Foxp3),ENSMUSG00000051817(Sox12),ENSMUSG00000066687(Zbtb16),ENSMUSG000000764…
BP	GO:0051241	negative regulation of multicellular organismal process	245	152	397	1287	2.50631e-14	1.16039e-12	ENSMUSG00000000247(Lhx2),ENSMUSG00000000248(Clec2g),ENSMUSG00000000600(Krit1),ENSMUSG00000000982(Ccl3),ENSMUSG00000001123(Lgals9),ENSMUSG00000001288(Rarg),ENSMUSG00000001300(Efnb2),ENSMUSG00000001348(Acp5),ENSMUSG00000001467(Cyp51),ENSMUSG00000001627(Ifrd1),ENSMUSG00000001786(Fbxo7),ENSMUSG00000002602(Axl),ENSMUSG00000002983(Relb),ENSMUSG00000003269(Cyth2),ENSMUSG00000003352(Cacnb3),ENSMUSG000000…	ENSMUSG00000000326(Comt),ENSMUSG00000000440(Pparg),ENSMUSG00000000869(Il4),ENSMUSG00000001036(Epn2),ENSMUSG00000001227(Sema6b),ENSMUSG00000001761(Smo),ENSMUSG00000004099(Dnmt1),ENSMUSG00000004530(Coro1c),ENSMUSG00000004798(Ulk2),ENSMUSG00000005102(Eif2ak4),ENSMUSG00000005469(Prkaca),ENSMUSG00000005583(Mef2c),ENSMUSG00000006717(Acot13),ENSMUSG00000007613(Tgfbr1),ENSMUSG00000008855(Hdac5),ENSMUSG00…
BP	GO:0030099	myeloid cell differentiation	104	51	155	401	2.58288e-14	1.19126e-12	ENSMUSG00000000248(Clec2g),ENSMUSG00000000532(Acvr1b),ENSMUSG00000000982(Ccl3),ENSMUSG00000001288(Rarg),ENSMUSG00000002111(Spi1),ENSMUSG00000002983(Relb),ENSMUSG00000003070(Efna2),ENSMUSG00000004040(Stat3),ENSMUSG00000004043(Stat5a),ENSMUSG00000004266(Ptpn6),ENSMUSG00000004296(Il12b),ENSMUSG00000005103(Wdr1),ENSMUSG00000008193(Spib),ENSMUSG00000008976(Gabpa),ENSMUSG00000014599(Csf1),ENSMUSG000000…	ENSMUSG00000000440(Pparg),ENSMUSG00000000869(Il4),ENSMUSG00000003812(Dnase2a),ENSMUSG00000005583(Mef2c),ENSMUSG00000006362(Cbfa2t3),ENSMUSG00000016087(Fli1),ENSMUSG00000018669(Cdk5rap3),ENSMUSG00000020167(Tcf3),ENSMUSG00000020689(Itgb3),ENSMUSG00000021127(Zfp36l1),ENSMUSG00000021250(Fos),ENSMUSG00000021356(Irf4),ENSMUSG00000022105(Rb1),ENSMUSG00000022672(Prkdc),ENSMUSG00000024140(Epas1),ENSMUSG00…
BP	GO:0070647	protein modification by small protein conjugation or removal	190	115	305	938	2.58748e-14	1.19126e-12	ENSMUSG00000000275(Trim25),ENSMUSG00000001098(Kctd10),ENSMUSG00000001786(Fbxo7),ENSMUSG00000002307(Daxx),ENSMUSG00000003226(Ranbp2),ENSMUSG00000003308(Keap1),ENSMUSG00000004364(Cul3),ENSMUSG00000004947(Dtx2),ENSMUSG00000005312(Ubqln1),ENSMUSG00000006418(Rnf114),ENSMUSG00000007655(Cav1),ENSMUSG00000014349(Ube2z),ENSMUSG00000015305(Sash1),ENSMUSG00000015837(Sqstm1),ENSMUSG00000015839(Nfe2l2),ENSMUS…	ENSMUSG00000001054(Rmnd5b),ENSMUSG00000001228(Uhrf1),ENSMUSG00000001366(Fbxo9),ENSMUSG00000002109(Ddb2),ENSMUSG00000003421(Nosip),ENSMUSG00000006435(Neurl1a),ENSMUSG00000007613(Tgfbr1),ENSMUSG00000014164(Klhl3),ENSMUSG00000014470(Rnf166),ENSMUSG00000017146(Brca1),ENSMUSG00000018537(Pcgf2),ENSMUSG00000018548(Trim37),ENSMUSG00000018669(Cdk5rap3),ENSMUSG00000018909(Arrb1),ENSMUSG00000019295(Tmem129)…
BP	GO:0009653	anatomical structure morphogenesis	420	326	746	2680	2.59611e-14	1.19189e-12	ENSMUSG00000000247(Lhx2),ENSMUSG00000000555(Itga5),ENSMUSG00000000600(Krit1),ENSMUSG00000000628(Hk2),ENSMUSG00000000957(Mmp14),ENSMUSG00000000982(Ccl3),ENSMUSG00000001052(Sec24b),ENSMUSG00000001089(Luzp1),ENSMUSG00000001098(Kctd10),ENSMUSG00000001288(Rarg),ENSMUSG00000001300(Efnb2),ENSMUSG00000001348(Acp5),ENSMUSG00000001435(Col18a1),ENSMUSG00000001627(Ifrd1),ENSMUSG00000001632(Brpf1),ENSMUSG0000…	ENSMUSG00000000149(Gna12),ENSMUSG00000000440(Pparg),ENSMUSG00000000869(Il4),ENSMUSG00000001036(Epn2),ENSMUSG00000001227(Sema6b),ENSMUSG00000001419(Mef2d),ENSMUSG00000001751(Naglu),ENSMUSG00000001761(Smo),ENSMUSG00000001827(Folr1),ENSMUSG00000002274(Metrn),ENSMUSG00000002289(Angptl4),ENSMUSG00000002409(Dyrk1b),ENSMUSG00000002731(Prkra),ENSMUSG00000003282(Plag1),ENSMUSG00000003882(Il7r),ENSMUSG0000…
BP	GO:0071705	nitrogen compound transport	307	281	588	2040	2.79092e-14	1.27776e-12	ENSMUSG00000001052(Sec24b),ENSMUSG00000001300(Efnb2),ENSMUSG00000001440(Kpnb1),ENSMUSG00000001467(Cyp51),ENSMUSG00000001786(Fbxo7),ENSMUSG00000003226(Ranbp2),ENSMUSG00000003352(Cacnb3),ENSMUSG00000003746(Man1a),ENSMUSG00000004040(Stat3),ENSMUSG00000004044(Cavin1),ENSMUSG00000004296(Il12b),ENSMUSG00000004446(Bid),ENSMUSG00000004771(Rab11a),ENSMUSG00000004902(Slc25a18),ENSMUSG00000006005(Tpr),ENSMU…	ENSMUSG00000000440(Pparg),ENSMUSG00000000631(Myo18a),ENSMUSG00000001143(Lman2l),ENSMUSG00000001436(Slc19a1),ENSMUSG00000001761(Smo),ENSMUSG00000001827(Folr1),ENSMUSG00000002031(Ift46),ENSMUSG00000002083(Bbc3),ENSMUSG00000002308(Cd320),ENSMUSG00000002346(Slc25a42),ENSMUSG00000002625(Akap8l),ENSMUSG00000002910(Arrdc2),ENSMUSG00000003134(Tbc1d8),ENSMUSG00000004347(Pde1c),ENSMUSG00000004768(Rab23),EN…
MF	GO:0016817	hydrolase activity, acting on acid anhydrides	131	141	272	816	2.81396e-14	1.28117e-12	ENSMUSG00000000001(Gnai3),ENSMUSG00000001473(Tubb6),ENSMUSG00000002227(Mov10),ENSMUSG00000002233(Rhoc),ENSMUSG00000004451(Ralb),ENSMUSG00000004668(Abca13),ENSMUSG00000004771(Rab11a),ENSMUSG00000006740(Kif5b),ENSMUSG00000013662(Atad1),ENSMUSG00000017144(Rnd3),ENSMUSG00000017830(Dhx58),ENSMUSG00000017831(Rab5a),ENSMUSG00000018417(Myo1b),ENSMUSG00000018583(G3bp1),ENSMUSG00000018707(Dync1h1),ENSMUSG0…	ENSMUSG00000000149(Gna12),ENSMUSG00000000631(Myo18a),ENSMUSG00000002346(Slc25a42),ENSMUSG00000002870(Mcm2),ENSMUSG00000004187(Kifc2),ENSMUSG00000004768(Rab23),ENSMUSG00000005045(Chd5),ENSMUSG00000005370(Msh6),ENSMUSG00000006019(Dhx34),ENSMUSG00000007646(Rad51c),ENSMUSG00000010021(Kif19a),ENSMUSG00000011148(Adssl1),ENSMUSG00000015711(Prune1),ENSMUSG00000016349(Eef1a2),ENSMUSG00000017550(Atad5),ENS…
MF	GO:0016818	hydrolase activity, acting on acid anhydrides, in phosphorus-containing anhydrides	131	141	272	816	2.81396e-14	1.28117e-12	ENSMUSG00000000001(Gnai3),ENSMUSG00000001473(Tubb6),ENSMUSG00000002227(Mov10),ENSMUSG00000002233(Rhoc),ENSMUSG00000004451(Ralb),ENSMUSG00000004668(Abca13),ENSMUSG00000004771(Rab11a),ENSMUSG00000006740(Kif5b),ENSMUSG00000013662(Atad1),ENSMUSG00000017144(Rnd3),ENSMUSG00000017830(Dhx58),ENSMUSG00000017831(Rab5a),ENSMUSG00000018417(Myo1b),ENSMUSG00000018583(G3bp1),ENSMUSG00000018707(Dync1h1),ENSMUSG0…	ENSMUSG00000000149(Gna12),ENSMUSG00000000631(Myo18a),ENSMUSG00000002346(Slc25a42),ENSMUSG00000002870(Mcm2),ENSMUSG00000004187(Kifc2),ENSMUSG00000004768(Rab23),ENSMUSG00000005045(Chd5),ENSMUSG00000005370(Msh6),ENSMUSG00000006019(Dhx34),ENSMUSG00000007646(Rad51c),ENSMUSG00000010021(Kif19a),ENSMUSG00000011148(Adssl1),ENSMUSG00000015711(Prune1),ENSMUSG00000016349(Eef1a2),ENSMUSG00000017550(Atad5),ENS…
BP	GO:1901565	organonitrogen compound catabolic process	215	166	381	1227	3.04626e-14	1.3831e-12	ENSMUSG00000000275(Trim25),ENSMUSG00000001098(Kctd10),ENSMUSG00000001441(Npepps),ENSMUSG00000001467(Cyp51),ENSMUSG00000001786(Fbxo7),ENSMUSG00000003308(Keap1),ENSMUSG00000003746(Man1a),ENSMUSG00000004364(Cul3),ENSMUSG00000005087(Cd44),ENSMUSG00000005312(Ubqln1),ENSMUSG00000005413(Hmox1),ENSMUSG00000005686(Ampd3),ENSMUSG00000005779(Psmb4),ENSMUSG00000006058(Snf8),ENSMUSG00000006418(Rnf114),ENSMUSG…	ENSMUSG00000000149(Gna12),ENSMUSG00000000326(Comt),ENSMUSG00000000673(Haao),ENSMUSG00000001054(Rmnd5b),ENSMUSG00000001228(Uhrf1),ENSMUSG00000001366(Fbxo9),ENSMUSG00000003346(Abhd17a),ENSMUSG00000003526(Prodh),ENSMUSG00000005043(Sgsh),ENSMUSG00000005469(Prkaca),ENSMUSG00000006344(Ggt5),ENSMUSG00000006362(Cbfa2t3),ENSMUSG00000007682(Dio2),ENSMUSG00000010047(Hyal2),ENSMUSG00000010051(Hyal1),ENSMUSG0…
BP	GO:0032635	interleukin-6 production	55	21	76	152	3.06624e-14	1.38834e-12	ENSMUSG00000001123(Lgals9),ENSMUSG00000002897(Il17ra),ENSMUSG00000004040(Stat3),ENSMUSG00000004266(Ptpn6),ENSMUSG00000008496(Pou2f2),ENSMUSG00000015316(Slamf1),ENSMUSG00000016528(Mapkapk2),ENSMUSG00000016529(Il10),ENSMUSG00000018500(Adora2b),ENSMUSG00000019850(Tnfaip3),ENSMUSG00000020227(Irak3),ENSMUSG00000020826(Nos2),ENSMUSG00000021457(Syk),ENSMUSG00000022514(Il1rap),ENSMUSG00000022749(Tbc1d23)…	ENSMUSG00000001741(Il16),ENSMUSG00000010047(Hyal2),ENSMUSG00000014158(Trpv4),ENSMUSG00000018909(Arrb1),ENSMUSG00000020399(Havcr2),ENSMUSG00000022667(Cd200r1),ENSMUSG00000022708(Zbtb20),ENSMUSG00000026288(Inpp5d),ENSMUSG00000027843(Ptpn22),ENSMUSG00000027947(Il6ra),ENSMUSG00000028864(Hgf),ENSMUSG00000029468(P2rx7),ENSMUSG00000031451(Gas6),ENSMUSG00000032109(Nlrx1),ENSMUSG00000037523(Mavs),ENSMUSG0…
BP	GO:0009057	macromolecule catabolic process	245	145	390	1262	3.22091e-14	1.45436e-12	ENSMUSG00000000275(Trim25),ENSMUSG00000000568(Hnrnpd),ENSMUSG00000001098(Kctd10),ENSMUSG00000001467(Cyp51),ENSMUSG00000001786(Fbxo7),ENSMUSG00000002227(Mov10),ENSMUSG00000003308(Keap1),ENSMUSG00000003746(Man1a),ENSMUSG00000004364(Cul3),ENSMUSG00000005087(Cd44),ENSMUSG00000005312(Ubqln1),ENSMUSG00000005779(Psmb4),ENSMUSG00000006058(Snf8),ENSMUSG00000006418(Rnf114),ENSMUSG00000007655(Cav1),ENSMUSG0…	ENSMUSG00000000149(Gna12),ENSMUSG00000001054(Rmnd5b),ENSMUSG00000001228(Uhrf1),ENSMUSG00000001366(Fbxo9),ENSMUSG00000003346(Abhd17a),ENSMUSG00000003812(Dnase2a),ENSMUSG00000005043(Sgsh),ENSMUSG00000005469(Prkaca),ENSMUSG00000006019(Dhx34),ENSMUSG00000006362(Cbfa2t3),ENSMUSG00000010047(Hyal2),ENSMUSG00000010051(Hyal1),ENSMUSG00000013622(Atraid),ENSMUSG00000014164(Klhl3),ENSMUSG00000014470(Rnf166),…
BP	GO:0002822	regulation of adaptive immune response based on somatic recombination of immune receptors built from immunoglobulin superfamily domains	53	24	77	155	3.24786e-14	1.46251e-12	ENSMUSG00000000791(Il12rb1),ENSMUSG00000004266(Ptpn6),ENSMUSG00000004296(Il12b),ENSMUSG00000015316(Slamf1),ENSMUSG00000015947(Fcgr1),ENSMUSG00000016206(H2-M3),ENSMUSG00000016496(Cd274),ENSMUSG00000017652(Cd40),ENSMUSG00000018899(Irf1),ENSMUSG00000019850(Tnfaip3),ENSMUSG00000020641(Rsad2),ENSMUSG00000022508(Bcl6),ENSMUSG00000024164(C3),ENSMUSG00000024339(Tap2),ENSMUSG00000024401(Tnf),ENSMUSG000000…	ENSMUSG00000000869(Il4),ENSMUSG00000003882(Il7r),ENSMUSG00000005583(Mef2c),ENSMUSG00000017550(Atad5),ENSMUSG00000017697(Ada),ENSMUSG00000018752(Tnfsfm13),ENSMUSG00000020399(Havcr2),ENSMUSG00000024151(Msh2),ENSMUSG00000025880(Smad7),ENSMUSG00000026012(Cd28),ENSMUSG00000026471(Mr1),ENSMUSG00000029468(P2rx7),ENSMUSG00000030051(Aplf),ENSMUSG00000031077(Fadd),ENSMUSG00000031101(Sash3),ENSMUSG000000324…
MF	GO:0016788	hydrolase activity, acting on ester bonds	105	143	248	730	3.8244e-14	1.71743e-12	ENSMUSG00000000409(Lck),ENSMUSG00000001348(Acp5),ENSMUSG00000002103(Acp2),ENSMUSG00000002847(Pla1a),ENSMUSG00000003123(Lipe),ENSMUSG00000004266(Ptpn6),ENSMUSG00000005413(Hmox1),ENSMUSG00000007036(Abhd16a),ENSMUSG00000009630(Ppp2cb),ENSMUSG00000014956(Ppp1cb),ENSMUSG00000015474(Ppt2),ENSMUSG00000018559(Ctdnep1),ENSMUSG00000018583(G3bp1),ENSMUSG00000020349(Ppp2ca),ENSMUSG00000020464(Pnpt1),ENSMUSG0…	ENSMUSG00000000686(Abhd15),ENSMUSG00000001942(Siae),ENSMUSG00000002228(Ppm1j),ENSMUSG00000002329(Mdp1),ENSMUSG00000003346(Abhd17a),ENSMUSG00000003518(Dusp3),ENSMUSG00000003812(Dnase2a),ENSMUSG00000004347(Pde1c),ENSMUSG00000004565(Pnpla6),ENSMUSG00000005043(Sgsh),ENSMUSG00000005447(Pafah1b3),ENSMUSG00000006717(Acot13),ENSMUSG00000006800(Sulf2),ENSMUSG00000007080(Pole),ENSMUSG00000007646(Rad51c),EN…
BP	GO:0034612	response to tumor necrosis factor	67	31	98	218	3.88463e-14	1.73972e-12	ENSMUSG00000000982(Ccl3),ENSMUSG00000009185(Ccl8),ENSMUSG00000015839(Nfe2l2),ENSMUSG00000017652(Cd40),ENSMUSG00000018899(Irf1),ENSMUSG00000018920(Cxcl16),ENSMUSG00000018930(Ccl4),ENSMUSG00000019122(Ccl9),ENSMUSG00000020696(Rffl),ENSMUSG00000021025(Nfkbia),ENSMUSG00000021367(Edn1),ENSMUSG00000021457(Syk),ENSMUSG00000022303(Dcstamp),ENSMUSG00000024401(Tnf),ENSMUSG00000024539(Ptpn2),ENSMUSG000000247…	ENSMUSG00000004071(Cdip1),ENSMUSG00000005534(Insr),ENSMUSG00000006344(Ggt5),ENSMUSG00000010047(Hyal2),ENSMUSG00000010051(Hyal1),ENSMUSG00000013483(Card14),ENSMUSG00000015337(Endog),ENSMUSG00000017146(Brca1),ENSMUSG00000020889(Nr1d1),ENSMUSG00000021127(Zfp36l1),ENSMUSG00000022367(Has2),ENSMUSG00000023019(Gpd1),ENSMUSG00000023826(Prkn),ENSMUSG00000023915(Tnfrsf21),ENSMUSG00000028101(Pias3),ENSMUSG0…
BP	GO:0045184	establishment of protein localization	269	241	510	1734	4.67805e-14	2.08936e-12	ENSMUSG00000000628(Hk2),ENSMUSG00000001052(Sec24b),ENSMUSG00000001175(Calm1),ENSMUSG00000001300(Efnb2),ENSMUSG00000001416(Cct3),ENSMUSG00000001440(Kpnb1),ENSMUSG00000001467(Cyp51),ENSMUSG00000001786(Fbxo7),ENSMUSG00000002413(Braf),ENSMUSG00000003226(Ranbp2),ENSMUSG00000003352(Cacnb3),ENSMUSG00000003746(Man1a),ENSMUSG00000004040(Stat3),ENSMUSG00000004044(Cavin1),ENSMUSG00000004296(Il12b),ENSMUSG00…	ENSMUSG00000000440(Pparg),ENSMUSG00000000631(Myo18a),ENSMUSG00000001143(Lman2l),ENSMUSG00000001761(Smo),ENSMUSG00000001827(Folr1),ENSMUSG00000002031(Ift46),ENSMUSG00000002083(Bbc3),ENSMUSG00000002625(Akap8l),ENSMUSG00000002910(Arrdc2),ENSMUSG00000003134(Tbc1d8),ENSMUSG00000004347(Pde1c),ENSMUSG00000004530(Coro1c),ENSMUSG00000004768(Rab23),ENSMUSG00000005469(Prkaca),ENSMUSG00000005699(Pard6a),ENSM…
BP	GO:0045597	positive regulation of cell differentiation	212	132	344	1089	4.70963e-14	2.09776e-12	ENSMUSG00000000409(Lck),ENSMUSG00000000532(Acvr1b),ENSMUSG00000000708(Kat2b),ENSMUSG00000000957(Mmp14),ENSMUSG00000000982(Ccl3),ENSMUSG00000001123(Lgals9),ENSMUSG00000001300(Efnb2),ENSMUSG00000001768(Rin2),ENSMUSG00000001785(Pwp1),ENSMUSG00000002413(Braf),ENSMUSG00000002602(Axl),ENSMUSG00000003948(Mmd),ENSMUSG00000004040(Stat3),ENSMUSG00000004043(Stat5a),ENSMUSG00000004296(Il12b),ENSMUSG000000047…	ENSMUSG00000000440(Pparg),ENSMUSG00000000869(Il4),ENSMUSG00000001761(Smo),ENSMUSG00000002274(Metrn),ENSMUSG00000003282(Plag1),ENSMUSG00000003575(Crtc1),ENSMUSG00000003882(Il7r),ENSMUSG00000005514(Por),ENSMUSG00000005583(Mef2c),ENSMUSG00000005893(Nr2c2),ENSMUSG00000006235(Epor),ENSMUSG00000006435(Neurl1a),ENSMUSG00000007613(Tgfbr1),ENSMUSG00000013622(Atraid),ENSMUSG00000016493(Cd46),ENSMUSG0000001…
BP	GO:0080135	regulation of cellular response to stress	142	92	234	681	5.06588e-14	2.25035e-12	ENSMUSG00000001707(Eef1e1),ENSMUSG00000001786(Fbxo7),ENSMUSG00000002413(Braf),ENSMUSG00000003208(Yju2),ENSMUSG00000003541(Ier3),ENSMUSG00000004085(Map3k20),ENSMUSG00000004221(Ikbkg),ENSMUSG00000004446(Bid),ENSMUSG00000004936(Map2k1),ENSMUSG00000005087(Cd44),ENSMUSG00000005312(Ubqln1),ENSMUSG00000006818(Sod2),ENSMUSG00000007655(Cav1),ENSMUSG00000009376(Met),ENSMUSG00000012519(Mlkl),ENSMUSG00000015…	ENSMUSG00000003190(Bcl2l12),ENSMUSG00000003518(Dusp3),ENSMUSG00000006235(Epor),ENSMUSG00000010461(Eya4),ENSMUSG00000013236(Ptprs),ENSMUSG00000014158(Trpv4),ENSMUSG00000014426(Map3k4),ENSMUSG00000015337(Endog),ENSMUSG00000016984(Etaa1),ENSMUSG00000017119(Nbr1),ENSMUSG00000017146(Brca1),ENSMUSG00000017550(Atad5),ENSMUSG00000019773(Fbxo5),ENSMUSG00000020032(Nuak1),ENSMUSG00000020228(Helb),ENSMUSG000…
BP	GO:0045089	positive regulation of innate immune response	55	7	62	114	5.11686e-14	2.26686e-12	ENSMUSG00000000776(Polr3d),ENSMUSG00000001123(Lgals9),ENSMUSG00000004043(Stat5a),ENSMUSG00000004296(Il12b),ENSMUSG00000010358(Ifi35),ENSMUSG00000016206(H2-M3),ENSMUSG00000018160(Med1),ENSMUSG00000020115(Tbk1),ENSMUSG00000021270(Hsp90aa1),ENSMUSG00000021938(Pspc1),ENSMUSG00000022752(Tomm70a),ENSMUSG00000022906(Parp9),ENSMUSG00000024404(Riok3),ENSMUSG00000024610(Cd74),ENSMUSG00000025058(Tasl),ENSMU…	ENSMUSG00000020399(Havcr2),ENSMUSG00000022471(Xrcc6),ENSMUSG00000022672(Prkdc),ENSMUSG00000031077(Fadd),ENSMUSG00000035834(Polr3g),ENSMUSG00000037523(Mavs),ENSMUSG00000079685(Ulbp1)
BP	GO:0033674	positive regulation of kinase activity	123	74	197	549	5.14194e-14	2.27185e-12	ENSMUSG00000000184(Ccnd2),ENSMUSG00000001123(Lgals9),ENSMUSG00000002307(Daxx),ENSMUSG00000002413(Braf),ENSMUSG00000002602(Axl),ENSMUSG00000002699(Lcp2),ENSMUSG00000003226(Ranbp2),ENSMUSG00000003948(Mmd),ENSMUSG00000004085(Map3k20),ENSMUSG00000004221(Ikbkg),ENSMUSG00000004296(Il12b),ENSMUSG00000004451(Ralb),ENSMUSG00000004936(Map2k1),ENSMUSG00000006134(Crkl),ENSMUSG00000006262(Mob1b),ENSMUSG000000…	ENSMUSG00000000869(Il4),ENSMUSG00000005534(Insr),ENSMUSG00000005583(Mef2c),ENSMUSG00000005958(Ephb3),ENSMUSG00000006435(Neurl1a),ENSMUSG00000007613(Tgfbr1),ENSMUSG00000009621(Vav2),ENSMUSG00000014426(Map3k4),ENSMUSG00000016349(Eef1a2),ENSMUSG00000016984(Etaa1),ENSMUSG00000018909(Arrb1),ENSMUSG00000020167(Tcf3),ENSMUSG00000020312(Shc2),ENSMUSG00000020541(Tom1l1),ENSMUSG00000020689(Itgb3),ENSMUSG00…
BP	GO:0042886	amide transport	270	235	505	1716	5.69383e-14	2.50895e-12	ENSMUSG00000001052(Sec24b),ENSMUSG00000001300(Efnb2),ENSMUSG00000001440(Kpnb1),ENSMUSG00000001467(Cyp51),ENSMUSG00000001786(Fbxo7),ENSMUSG00000003226(Ranbp2),ENSMUSG00000003352(Cacnb3),ENSMUSG00000003746(Man1a),ENSMUSG00000004040(Stat3),ENSMUSG00000004044(Cavin1),ENSMUSG00000004296(Il12b),ENSMUSG00000004446(Bid),ENSMUSG00000004771(Rab11a),ENSMUSG00000006005(Tpr),ENSMUSG00000006058(Snf8),ENSMUSG00…	ENSMUSG00000000440(Pparg),ENSMUSG00000000631(Myo18a),ENSMUSG00000001143(Lman2l),ENSMUSG00000001436(Slc19a1),ENSMUSG00000001761(Smo),ENSMUSG00000001827(Folr1),ENSMUSG00000002031(Ift46),ENSMUSG00000002083(Bbc3),ENSMUSG00000002625(Akap8l),ENSMUSG00000002910(Arrdc2),ENSMUSG00000003134(Tbc1d8),ENSMUSG00000004347(Pde1c),ENSMUSG00000004768(Rab23),ENSMUSG00000005469(Prkaca),ENSMUSG00000005699(Pard6a),ENS…
BP	GO:0002703	regulation of leukocyte mediated immunity	71	25	96	213	5.8027e-14	2.55009e-12	ENSMUSG00000001123(Lgals9),ENSMUSG00000004043(Stat5a),ENSMUSG00000004266(Ptpn6),ENSMUSG00000004296(Il12b),ENSMUSG00000005413(Hmox1),ENSMUSG00000015316(Slamf1),ENSMUSG00000015947(Fcgr1),ENSMUSG00000016206(H2-M3),ENSMUSG00000017631(Abr),ENSMUSG00000017652(Cd40),ENSMUSG00000017776(Crk),ENSMUSG00000018500(Adora2b),ENSMUSG00000020075(Ddx21),ENSMUSG00000020641(Rsad2),ENSMUSG00000021457(Syk),ENSMUSG0000…	ENSMUSG00000000869(Il4),ENSMUSG00000003882(Il7r),ENSMUSG00000017550(Atad5),ENSMUSG00000018752(Tnfsfm13),ENSMUSG00000020399(Havcr2),ENSMUSG00000024151(Msh2),ENSMUSG00000025880(Smad7),ENSMUSG00000026012(Cd28),ENSMUSG00000026471(Mr1),ENSMUSG00000029468(P2rx7),ENSMUSG00000030051(Aplf),ENSMUSG00000031077(Fadd),ENSMUSG00000031101(Sash3),ENSMUSG00000032498(Mlh1),ENSMUSG00000034652(Cd300a),ENSMUSG0000003…
BP	GO:0015833	peptide transport	268	229	497	1685	6.11412e-14	2.67978e-12	ENSMUSG00000001052(Sec24b),ENSMUSG00000001300(Efnb2),ENSMUSG00000001440(Kpnb1),ENSMUSG00000001467(Cyp51),ENSMUSG00000001786(Fbxo7),ENSMUSG00000003226(Ranbp2),ENSMUSG00000003352(Cacnb3),ENSMUSG00000003746(Man1a),ENSMUSG00000004040(Stat3),ENSMUSG00000004044(Cavin1),ENSMUSG00000004296(Il12b),ENSMUSG00000004446(Bid),ENSMUSG00000004771(Rab11a),ENSMUSG00000006005(Tpr),ENSMUSG00000006058(Snf8),ENSMUSG00…	ENSMUSG00000000440(Pparg),ENSMUSG00000000631(Myo18a),ENSMUSG00000001143(Lman2l),ENSMUSG00000001761(Smo),ENSMUSG00000001827(Folr1),ENSMUSG00000002031(Ift46),ENSMUSG00000002083(Bbc3),ENSMUSG00000002625(Akap8l),ENSMUSG00000002910(Arrdc2),ENSMUSG00000003134(Tbc1d8),ENSMUSG00000004347(Pde1c),ENSMUSG00000004768(Rab23),ENSMUSG00000005469(Prkaca),ENSMUSG00000005699(Pard6a),ENSMUSG00000006464(Bbs1),ENSMUS…
BP	GO:0032446	protein modification by small protein conjugation	167	103	270	815	7.68853e-14	3.36087e-12	ENSMUSG00000000275(Trim25),ENSMUSG00000001098(Kctd10),ENSMUSG00000001786(Fbxo7),ENSMUSG00000002307(Daxx),ENSMUSG00000003226(Ranbp2),ENSMUSG00000003308(Keap1),ENSMUSG00000004364(Cul3),ENSMUSG00000004947(Dtx2),ENSMUSG00000005312(Ubqln1),ENSMUSG00000006418(Rnf114),ENSMUSG00000007655(Cav1),ENSMUSG00000014349(Ube2z),ENSMUSG00000015305(Sash1),ENSMUSG00000015837(Sqstm1),ENSMUSG00000015839(Nfe2l2),ENSMUS…	ENSMUSG00000001054(Rmnd5b),ENSMUSG00000001228(Uhrf1),ENSMUSG00000001366(Fbxo9),ENSMUSG00000002109(Ddb2),ENSMUSG00000003421(Nosip),ENSMUSG00000006435(Neurl1a),ENSMUSG00000007613(Tgfbr1),ENSMUSG00000014164(Klhl3),ENSMUSG00000014470(Rnf166),ENSMUSG00000017146(Brca1),ENSMUSG00000018537(Pcgf2),ENSMUSG00000018548(Trim37),ENSMUSG00000018669(Cdk5rap3),ENSMUSG00000018909(Arrb1),ENSMUSG00000019295(Tmem129)…
BP	GO:0070665	positive regulation of leukocyte proliferation	47	25	72	143	9.19614e-14	4.00923e-12	ENSMUSG00000000732(Icosl),ENSMUSG00000000791(Il12rb1),ENSMUSG00000004043(Stat5a),ENSMUSG00000004296(Il12b),ENSMUSG00000004709(Cd244a),ENSMUSG00000014599(Csf1),ENSMUSG00000015316(Slamf1),ENSMUSG00000016496(Cd274),ENSMUSG00000017652(Cd40),ENSMUSG00000020134(Peli1),ENSMUSG00000021457(Syk),ENSMUSG00000022508(Bcl6),ENSMUSG00000022901(Cd86),ENSMUSG00000023067(Cdkn1a),ENSMUSG00000024397(Aif1),ENSMUSG000…	ENSMUSG00000000869(Il4),ENSMUSG00000002308(Cd320),ENSMUSG00000005583(Mef2c),ENSMUSG00000016493(Cd46),ENSMUSG00000017550(Atad5),ENSMUSG00000017697(Ada),ENSMUSG00000020167(Tcf3),ENSMUSG00000020399(Havcr2),ENSMUSG00000021756(Il6st),ENSMUSG00000022885(St6gal1),ENSMUSG00000024978(Gpam),ENSMUSG00000026012(Cd28),ENSMUSG00000026117(Zap70),ENSMUSG00000027544(Nfatc2),ENSMUSG00000027843(Ptpn22),ENSMUSG00000…
BP	GO:0070727	cellular macromolecule localization	281	246	527	1808	9.39704e-14	4.08597e-12	ENSMUSG00000000628(Hk2),ENSMUSG00000000957(Mmp14),ENSMUSG00000001052(Sec24b),ENSMUSG00000001175(Calm1),ENSMUSG00000001300(Efnb2),ENSMUSG00000001416(Cct3),ENSMUSG00000001440(Kpnb1),ENSMUSG00000001763(Tspan33),ENSMUSG00000001786(Fbxo7),ENSMUSG00000002413(Braf),ENSMUSG00000003226(Ranbp2),ENSMUSG00000003352(Cacnb3),ENSMUSG00000003746(Man1a),ENSMUSG00000004040(Stat3),ENSMUSG00000004446(Bid),ENSMUSG000…	ENSMUSG00000000751(Rpa1),ENSMUSG00000001761(Smo),ENSMUSG00000001827(Folr1),ENSMUSG00000002031(Ift46),ENSMUSG00000002055(Spag5),ENSMUSG00000002083(Bbc3),ENSMUSG00000002625(Akap8l),ENSMUSG00000003134(Tbc1d8),ENSMUSG00000003346(Abhd17a),ENSMUSG00000003378(Grik5),ENSMUSG00000003452(Bicd1),ENSMUSG00000004768(Rab23),ENSMUSG00000005469(Prkaca),ENSMUSG00000005699(Pard6a),ENSMUSG00000006464(Bbs1),ENSMUSG0…
MF	GO:0019900	kinase binding	160	111	271	820	9.77152e-14	4.23759e-12	ENSMUSG00000000184(Ccnd2),ENSMUSG00000000409(Lck),ENSMUSG00000000708(Kat2b),ENSMUSG00000001175(Calm1),ENSMUSG00000001786(Fbxo7),ENSMUSG00000002233(Rhoc),ENSMUSG00000002307(Daxx),ENSMUSG00000002413(Braf),ENSMUSG00000002983(Relb),ENSMUSG00000002997(Prkar2b),ENSMUSG00000003119(Cdk12),ENSMUSG00000003123(Lipe),ENSMUSG00000003352(Cacnb3),ENSMUSG00000004040(Stat3),ENSMUSG00000004266(Ptpn6),ENSMUSG000000…	ENSMUSG00000002731(Prkra),ENSMUSG00000003153(Slc2a3),ENSMUSG00000003452(Bicd1),ENSMUSG00000003518(Dusp3),ENSMUSG00000005198(Polr2a),ENSMUSG00000005374(Tbl2),ENSMUSG00000005469(Prkaca),ENSMUSG00000005534(Insr),ENSMUSG00000005699(Pard6a),ENSMUSG00000006678(Pola1),ENSMUSG00000008855(Hdac5),ENSMUSG00000009090(Ap1b1),ENSMUSG00000010047(Hyal2),ENSMUSG00000014158(Trpv4),ENSMUSG00000016349(Eef1a2),ENSMUS…
BP	GO:0010506	regulation of autophagy	63	50	113	268	1.03444e-13	4.47423e-12	ENSMUSG00000000001(Gnai3),ENSMUSG00000000628(Hk2),ENSMUSG00000001786(Fbxo7),ENSMUSG00000002845(Tmem39a),ENSMUSG00000003308(Keap1),ENSMUSG00000004040(Stat3),ENSMUSG00000004221(Ikbkg),ENSMUSG00000004446(Bid),ENSMUSG00000004451(Ralb),ENSMUSG00000004936(Map2k1),ENSMUSG00000005312(Ubqln1),ENSMUSG00000005413(Hmox1),ENSMUSG00000005610(Eif4g2),ENSMUSG00000016529(Il10),ENSMUSG00000019471(Cdc37),ENSMUSG000…	ENSMUSG00000000869(Il4),ENSMUSG00000004798(Ulk2),ENSMUSG00000005102(Eif2ak4),ENSMUSG00000010057(Nprl2),ENSMUSG00000019302(Atp6v0a1),ENSMUSG00000022051(Bnip3l),ENSMUSG00000022750(Klhl22),ENSMUSG00000023826(Prkn),ENSMUSG00000023990(Tfeb),ENSMUSG00000024413(Npc1),ENSMUSG00000025737(Wdr24),ENSMUSG00000026228(Htr2b),ENSMUSG00000026792(Lrsam1),ENSMUSG00000027843(Ptpn22),ENSMUSG00000028086(Fbxw7),ENSMUS…
BP	GO:0046907	intracellular transport	242	193	435	1446	1.04361e-13	4.50203e-12	ENSMUSG00000001052(Sec24b),ENSMUSG00000001440(Kpnb1),ENSMUSG00000001786(Fbxo7),ENSMUSG00000003226(Ranbp2),ENSMUSG00000003352(Cacnb3),ENSMUSG00000003746(Man1a),ENSMUSG00000004040(Stat3),ENSMUSG00000004364(Cul3),ENSMUSG00000004446(Bid),ENSMUSG00000004771(Rab11a),ENSMUSG00000004936(Map2k1),ENSMUSG00000005413(Hmox1),ENSMUSG00000005732(Ranbp1),ENSMUSG00000006005(Tpr),ENSMUSG00000006058(Snf8),ENSMUSG00…	ENSMUSG00000000869(Il4),ENSMUSG00000001143(Lman2l),ENSMUSG00000001761(Smo),ENSMUSG00000001827(Folr1),ENSMUSG00000002031(Ift46),ENSMUSG00000002055(Spag5),ENSMUSG00000002083(Bbc3),ENSMUSG00000002625(Akap8l),ENSMUSG00000003134(Tbc1d8),ENSMUSG00000003452(Bicd1),ENSMUSG00000004530(Coro1c),ENSMUSG00000004567(Mcoln1),ENSMUSG00000004768(Rab23),ENSMUSG00000005469(Prkaca),ENSMUSG00000006464(Bbs1),ENSMUSG00…
BP	GO:0050730	regulation of peptidyl-tyrosine phosphorylation	83	29	112	265	1.09684e-13	4.7193e-12	ENSMUSG00000000409(Lck),ENSMUSG00000000555(Itga5),ENSMUSG00000004266(Ptpn6),ENSMUSG00000004296(Il12b),ENSMUSG00000005087(Cd44),ENSMUSG00000007655(Cav1),ENSMUSG00000015947(Fcgr1),ENSMUSG00000015950(Ncf1),ENSMUSG00000017548(Suz12),ENSMUSG00000017652(Cd40),ENSMUSG00000018899(Irf1),ENSMUSG00000018916(Csf2),ENSMUSG00000020122(Egfr),ENSMUSG00000020717(Pecam1),ENSMUSG00000021457(Syk),ENSMUSG00000021702(…	ENSMUSG00000000869(Il4),ENSMUSG00000006435(Neurl1a),ENSMUSG00000010047(Hyal2),ENSMUSG00000020167(Tcf3),ENSMUSG00000020689(Itgb3),ENSMUSG00000020888(Dvl2),ENSMUSG00000021365(Nedd9),ENSMUSG00000021756(Il6st),ENSMUSG00000024962(Vegfb),ENSMUSG00000026842(Abl1),ENSMUSG00000027843(Ptpn22),ENSMUSG00000027947(Il6ra),ENSMUSG00000028017(Egf),ENSMUSG00000028019(Pdgfc),ENSMUSG00000028086(Fbxw7),ENSMUSG000000…
BP	GO:0034613	cellular protein localization	279	245	524	1798	1.15324e-13	4.94899e-12	ENSMUSG00000000628(Hk2),ENSMUSG00000000957(Mmp14),ENSMUSG00000001052(Sec24b),ENSMUSG00000001175(Calm1),ENSMUSG00000001300(Efnb2),ENSMUSG00000001416(Cct3),ENSMUSG00000001440(Kpnb1),ENSMUSG00000001763(Tspan33),ENSMUSG00000001786(Fbxo7),ENSMUSG00000002413(Braf),ENSMUSG00000003226(Ranbp2),ENSMUSG00000003352(Cacnb3),ENSMUSG00000003746(Man1a),ENSMUSG00000004040(Stat3),ENSMUSG00000004446(Bid),ENSMUSG000…	ENSMUSG00000000751(Rpa1),ENSMUSG00000001761(Smo),ENSMUSG00000001827(Folr1),ENSMUSG00000002031(Ift46),ENSMUSG00000002055(Spag5),ENSMUSG00000002083(Bbc3),ENSMUSG00000002625(Akap8l),ENSMUSG00000003134(Tbc1d8),ENSMUSG00000003346(Abhd17a),ENSMUSG00000003378(Grik5),ENSMUSG00000003452(Bicd1),ENSMUSG00000004768(Rab23),ENSMUSG00000005469(Prkaca),ENSMUSG00000005699(Pard6a),ENSMUSG00000006464(Bbs1),ENSMUSG0…
BP	GO:0032502	developmental process	881	743	1624	6436	1.24675e-13	5.33635e-12	ENSMUSG00000000001(Gnai3),ENSMUSG00000000247(Lhx2),ENSMUSG00000000248(Clec2g),ENSMUSG00000000409(Lck),ENSMUSG00000000532(Acvr1b),ENSMUSG00000000555(Itga5),ENSMUSG00000000568(Hnrnpd),ENSMUSG00000000600(Krit1),ENSMUSG00000000628(Hk2),ENSMUSG00000000708(Kat2b),ENSMUSG00000000730(Dnmt3l),ENSMUSG00000000732(Icosl),ENSMUSG00000000838(Fmr1),ENSMUSG00000000915(Hip1r),ENSMUSG00000000957(Mmp14),ENSMUSG0000…	ENSMUSG00000000149(Gna12),ENSMUSG00000000282(Mnt),ENSMUSG00000000326(Comt),ENSMUSG00000000440(Pparg),ENSMUSG00000000751(Rpa1),ENSMUSG00000000869(Il4),ENSMUSG00000001036(Epn2),ENSMUSG00000001053(N4bp3),ENSMUSG00000001227(Sema6b),ENSMUSG00000001366(Fbxo9),ENSMUSG00000001419(Mef2d),ENSMUSG00000001751(Naglu),ENSMUSG00000001761(Smo),ENSMUSG00000001827(Folr1),ENSMUSG00000002083(Bbc3),ENSMUSG00000002274…
BP	GO:0030098	lymphocyte differentiation	97	51	148	384	1.30197e-13	5.55823e-12	ENSMUSG00000000409(Lck),ENSMUSG00000000957(Mmp14),ENSMUSG00000001123(Lgals9),ENSMUSG00000001786(Fbxo7),ENSMUSG00000002111(Spi1),ENSMUSG00000002413(Braf),ENSMUSG00000002602(Axl),ENSMUSG00000002983(Relb),ENSMUSG00000004040(Stat3),ENSMUSG00000004043(Stat5a),ENSMUSG00000004266(Ptpn6),ENSMUSG00000004296(Il12b),ENSMUSG00000008496(Pou2f2),ENSMUSG00000013846(St3gal1),ENSMUSG00000014773(Dll1),ENSMUSG00000…	ENSMUSG00000000869(Il4),ENSMUSG00000003882(Il7r),ENSMUSG00000007476(Lrrc8a),ENSMUSG00000010054(Tusc2),ENSMUSG00000016493(Cd46),ENSMUSG00000017697(Ada),ENSMUSG00000020167(Tcf3),ENSMUSG00000020453(Patz1),ENSMUSG00000020605(Hs1bp3),ENSMUSG00000021127(Zfp36l1),ENSMUSG00000021356(Irf4),ENSMUSG00000022672(Prkdc),ENSMUSG00000023927(Satb1),ENSMUSG00000024151(Msh2),ENSMUSG00000024986(Hhex),ENSMUSG00000025…
BP	GO:0030031	cell projection assembly	69	119	188	522	1.32624e-13	5.64715e-12	ENSMUSG00000007655(Cav1),ENSMUSG00000008892(Vdac3),ENSMUSG00000017831(Rab5a),ENSMUSG00000018736(Ndel1),ENSMUSG00000020024(Cep83),ENSMUSG00000020152(Actr2),ENSMUSG00000020476(Dbnl),ENSMUSG00000021270(Hsp90aa1),ENSMUSG00000021823(Vcl),ENSMUSG00000021948(Prkcd),ENSMUSG00000022200(Golph3),ENSMUSG00000022262(Dnah5),ENSMUSG00000022272(Myo10),ENSMUSG00000022377(Asap1),ENSMUSG00000024143(Rhoq),ENSMUSG000…	ENSMUSG00000001482(Def8),ENSMUSG00000002031(Ift46),ENSMUSG00000002486(Tchp),ENSMUSG00000004530(Coro1c),ENSMUSG00000004768(Rab23),ENSMUSG00000006435(Neurl1a),ENSMUSG00000006464(Bbs1),ENSMUSG00000007613(Tgfbr1),ENSMUSG00000009621(Vav2),ENSMUSG00000011832(Evi5l),ENSMUSG00000012609(Ttll5),ENSMUSG00000014232(Cluap1),ENSMUSG00000015766(Eps8),ENSMUSG00000018199(Ro60),ENSMUSG00000018395(Kif3a),ENSMUSG000…
BP	GO:0030335	positive regulation of cell migration	132	65	197	554	1.39602e-13	5.92893e-12	ENSMUSG00000000532(Acvr1b),ENSMUSG00000000555(Itga5),ENSMUSG00000000957(Mmp14),ENSMUSG00000000982(Ccl3),ENSMUSG00000001123(Lgals9),ENSMUSG00000001435(Col18a1),ENSMUSG00000001768(Rin2),ENSMUSG00000002233(Rhoc),ENSMUSG00000004040(Stat3),ENSMUSG00000004043(Stat5a),ENSMUSG00000004771(Rab11a),ENSMUSG00000004936(Map2k1),ENSMUSG00000005413(Hmox1),ENSMUSG00000006134(Crkl),ENSMUSG00000006818(Sod2),ENSMUSG…	ENSMUSG00000000869(Il4),ENSMUSG00000001227(Sema6b),ENSMUSG00000001761(Smo),ENSMUSG00000005534(Insr),ENSMUSG00000007613(Tgfbr1),ENSMUSG00000010051(Hyal1),ENSMUSG00000014158(Trpv4),ENSMUSG00000016933(Plcg1),ENSMUSG00000019773(Fbxo5),ENSMUSG00000020689(Itgb3),ENSMUSG00000021365(Nedd9),ENSMUSG00000021508(Cxcl14),ENSMUSG00000021756(Il6st),ENSMUSG00000022367(Has2),ENSMUSG00000022469(Rapgef3),ENSMUSG000…
MF	GO:0019901	protein kinase binding	147	100	247	734	1.41416e-13	5.99051e-12	ENSMUSG00000000184(Ccnd2),ENSMUSG00000000409(Lck),ENSMUSG00000000708(Kat2b),ENSMUSG00000001175(Calm1),ENSMUSG00000001786(Fbxo7),ENSMUSG00000002233(Rhoc),ENSMUSG00000002307(Daxx),ENSMUSG00000002413(Braf),ENSMUSG00000002983(Relb),ENSMUSG00000002997(Prkar2b),ENSMUSG00000003119(Cdk12),ENSMUSG00000003123(Lipe),ENSMUSG00000003352(Cacnb3),ENSMUSG00000004040(Stat3),ENSMUSG00000004266(Ptpn6),ENSMUSG000000…	ENSMUSG00000002731(Prkra),ENSMUSG00000003452(Bicd1),ENSMUSG00000003518(Dusp3),ENSMUSG00000005374(Tbl2),ENSMUSG00000005469(Prkaca),ENSMUSG00000005534(Insr),ENSMUSG00000005699(Pard6a),ENSMUSG00000006678(Pola1),ENSMUSG00000008855(Hdac5),ENSMUSG00000009090(Ap1b1),ENSMUSG00000010047(Hyal2),ENSMUSG00000014158(Trpv4),ENSMUSG00000016349(Eef1a2),ENSMUSG00000016933(Plcg1),ENSMUSG00000017119(Nbr1),ENSMUSG00…
BP	GO:0045860	positive regulation of protein kinase activity	111	66	177	484	1.46532e-13	6.19126e-12	ENSMUSG00000000184(Ccnd2),ENSMUSG00000001123(Lgals9),ENSMUSG00000002307(Daxx),ENSMUSG00000002413(Braf),ENSMUSG00000002699(Lcp2),ENSMUSG00000003948(Mmd),ENSMUSG00000004085(Map3k20),ENSMUSG00000004221(Ikbkg),ENSMUSG00000004296(Il12b),ENSMUSG00000004451(Ralb),ENSMUSG00000004936(Map2k1),ENSMUSG00000006134(Crkl),ENSMUSG00000012519(Mlkl),ENSMUSG00000014599(Csf1),ENSMUSG00000015305(Sash1),ENSMUSG0000001…	ENSMUSG00000000869(Il4),ENSMUSG00000005534(Insr),ENSMUSG00000005583(Mef2c),ENSMUSG00000006435(Neurl1a),ENSMUSG00000007613(Tgfbr1),ENSMUSG00000014426(Map3k4),ENSMUSG00000016984(Etaa1),ENSMUSG00000018909(Arrb1),ENSMUSG00000020167(Tcf3),ENSMUSG00000020312(Shc2),ENSMUSG00000020541(Tom1l1),ENSMUSG00000020689(Itgb3),ENSMUSG00000020888(Dvl2),ENSMUSG00000021253(Tgfb3),ENSMUSG00000021365(Nedd9),ENSMUSG000…
BP	GO:0046631	alpha-beta T cell activation	54	21	75	153	1.68352e-13	7.09496e-12	ENSMUSG00000001123(Lgals9),ENSMUSG00000002413(Braf),ENSMUSG00000002983(Relb),ENSMUSG00000004040(Stat3),ENSMUSG00000004296(Il12b),ENSMUSG00000004709(Cd244a),ENSMUSG00000015396(Cd83),ENSMUSG00000016206(H2-M3),ENSMUSG00000016496(Cd274),ENSMUSG00000018899(Irf1),ENSMUSG00000019982(Myb),ENSMUSG00000020178(Adora2a),ENSMUSG00000020641(Rsad2),ENSMUSG00000021457(Syk),ENSMUSG00000021686(Ap3b1),ENSMUSG000000…	ENSMUSG00000000869(Il4),ENSMUSG00000017697(Ada),ENSMUSG00000021356(Irf4),ENSMUSG00000023927(Satb1),ENSMUSG00000025880(Smad7),ENSMUSG00000026012(Cd28),ENSMUSG00000026117(Zap70),ENSMUSG00000026842(Abl1),ENSMUSG00000027843(Ptpn22),ENSMUSG00000027947(Il6ra),ENSMUSG00000029657(Hsph1),ENSMUSG00000030528(Blm),ENSMUSG00000031101(Sash3),ENSMUSG00000032238(Rora),ENSMUSG00000032440(Tgfbr2),ENSMUSG0000003465…
MF	GO:0017111	nucleoside-triphosphatase activity	125	130	255	765	1.86393e-13	7.83517e-12	ENSMUSG00000000001(Gnai3),ENSMUSG00000001473(Tubb6),ENSMUSG00000002227(Mov10),ENSMUSG00000002233(Rhoc),ENSMUSG00000004451(Ralb),ENSMUSG00000004668(Abca13),ENSMUSG00000004771(Rab11a),ENSMUSG00000006740(Kif5b),ENSMUSG00000013662(Atad1),ENSMUSG00000017144(Rnd3),ENSMUSG00000017830(Dhx58),ENSMUSG00000017831(Rab5a),ENSMUSG00000018417(Myo1b),ENSMUSG00000018583(G3bp1),ENSMUSG00000018707(Dync1h1),ENSMUSG0…	ENSMUSG00000000149(Gna12),ENSMUSG00000000631(Myo18a),ENSMUSG00000002870(Mcm2),ENSMUSG00000004187(Kifc2),ENSMUSG00000004768(Rab23),ENSMUSG00000005045(Chd5),ENSMUSG00000005370(Msh6),ENSMUSG00000006019(Dhx34),ENSMUSG00000007646(Rad51c),ENSMUSG00000010021(Kif19a),ENSMUSG00000011148(Adssl1),ENSMUSG00000016349(Eef1a2),ENSMUSG00000017550(Atad5),ENSMUSG00000018395(Kif3a),ENSMUSG00000018398(Septin8),ENSMU…
BP	GO:0044403	symbiotic process	109	40	149	389	1.92705e-13	8.07982e-12	ENSMUSG00000000275(Trim25),ENSMUSG00000000385(Tmprss2),ENSMUSG00000000982(Ccl3),ENSMUSG00000001166(Oas1c),ENSMUSG00000001168(Oas1h),ENSMUSG00000002602(Axl),ENSMUSG00000002845(Tmem39a),ENSMUSG00000004591(Pkn2),ENSMUSG00000006058(Snf8),ENSMUSG00000006411(Nectin4),ENSMUSG00000007655(Cav1),ENSMUSG00000015950(Ncf1),ENSMUSG00000017002(Slpi),ENSMUSG00000017737(Mmp9),ENSMUSG00000017831(Rab5a),ENSMUSG0000…	ENSMUSG00000003452(Bicd1),ENSMUSG00000004798(Ulk2),ENSMUSG00000005102(Eif2ak4),ENSMUSG00000005534(Insr),ENSMUSG00000005718(Tfap4),ENSMUSG00000006235(Epor),ENSMUSG00000010047(Hyal2),ENSMUSG00000010051(Hyal1),ENSMUSG00000010054(Tusc2),ENSMUSG00000015846(Rxra),ENSMUSG00000020689(Itgb3),ENSMUSG00000023826(Prkn),ENSMUSG00000024413(Npc1),ENSMUSG00000026469(Xpr1),ENSMUSG00000026792(Lrsam1),ENSMUSG000000…
BP	GO:2001233	regulation of apoptotic signaling pathway	100	54	154	406	1.93458e-13	8.0908e-12	ENSMUSG00000000001(Gnai3),ENSMUSG00000000409(Lck),ENSMUSG00000000915(Hip1r),ENSMUSG00000001707(Eef1e1),ENSMUSG00000004221(Ikbkg),ENSMUSG00000004446(Bid),ENSMUSG00000004936(Map2k1),ENSMUSG00000005087(Cd44),ENSMUSG00000005312(Ubqln1),ENSMUSG00000005413(Hmox1),ENSMUSG00000006818(Sod2),ENSMUSG00000007655(Cav1),ENSMUSG00000015839(Nfe2l2),ENSMUSG00000016524(Il19),ENSMUSG00000017737(Mmp9),ENSMUSG0000001…	ENSMUSG00000000282(Mnt),ENSMUSG00000000869(Il4),ENSMUSG00000002083(Bbc3),ENSMUSG00000002731(Prkra),ENSMUSG00000003190(Bcl2l12),ENSMUSG00000005718(Tfap4),ENSMUSG00000007613(Tgfbr1),ENSMUSG00000010047(Hyal2),ENSMUSG00000010461(Eya4),ENSMUSG00000010751(Tnfrsf22),ENSMUSG00000017146(Brca1),ENSMUSG00000017550(Atad5),ENSMUSG00000018537(Pcgf2),ENSMUSG00000022105(Rb1),ENSMUSG00000022419(Deptor),ENSMUSG000…
BP	GO:0060341	regulation of cellular localization	184	152	336	1069	1.97569e-13	8.24173e-12	ENSMUSG00000000409(Lck),ENSMUSG00000000957(Mmp14),ENSMUSG00000000982(Ccl3),ENSMUSG00000001052(Sec24b),ENSMUSG00000001123(Lgals9),ENSMUSG00000001175(Calm1),ENSMUSG00000001300(Efnb2),ENSMUSG00000001416(Cct3),ENSMUSG00000002413(Braf),ENSMUSG00000003352(Cacnb3),ENSMUSG00000004266(Ptpn6),ENSMUSG00000004451(Ralb),ENSMUSG00000004771(Rab11a),ENSMUSG00000004936(Map2k1),ENSMUSG00000005103(Wdr1),ENSMUSG0000…	ENSMUSG00000000869(Il4),ENSMUSG00000001761(Smo),ENSMUSG00000002055(Spag5),ENSMUSG00000002083(Bbc3),ENSMUSG00000002625(Akap8l),ENSMUSG00000003346(Abhd17a),ENSMUSG00000003378(Grik5),ENSMUSG00000003452(Bicd1),ENSMUSG00000004347(Pde1c),ENSMUSG00000004567(Mcoln1),ENSMUSG00000004768(Rab23),ENSMUSG00000005469(Prkaca),ENSMUSG00000005583(Mef2c),ENSMUSG00000005699(Pard6a),ENSMUSG00000010047(Hyal2),ENSMUSG0…
BP	GO:0016567	protein ubiquitination	157	98	255	766	2.13029e-13	8.86414e-12	ENSMUSG00000000275(Trim25),ENSMUSG00000001098(Kctd10),ENSMUSG00000001786(Fbxo7),ENSMUSG00000002307(Daxx),ENSMUSG00000003308(Keap1),ENSMUSG00000004364(Cul3),ENSMUSG00000004947(Dtx2),ENSMUSG00000005312(Ubqln1),ENSMUSG00000006418(Rnf114),ENSMUSG00000007655(Cav1),ENSMUSG00000014349(Ube2z),ENSMUSG00000015305(Sash1),ENSMUSG00000015837(Sqstm1),ENSMUSG00000015839(Nfe2l2),ENSMUSG00000017548(Suz12),ENSMUSG…	ENSMUSG00000001054(Rmnd5b),ENSMUSG00000001228(Uhrf1),ENSMUSG00000001366(Fbxo9),ENSMUSG00000002109(Ddb2),ENSMUSG00000003421(Nosip),ENSMUSG00000006435(Neurl1a),ENSMUSG00000007613(Tgfbr1),ENSMUSG00000014164(Klhl3),ENSMUSG00000014470(Rnf166),ENSMUSG00000017146(Brca1),ENSMUSG00000018537(Pcgf2),ENSMUSG00000018548(Trim37),ENSMUSG00000018669(Cdk5rap3),ENSMUSG00000018909(Arrb1),ENSMUSG00000019295(Tmem129)…
BP	GO:0001959	regulation of cytokine-mediated signaling pathway	47	14	61	114	2.1592e-13	8.96176e-12	ENSMUSG00000002602(Axl),ENSMUSG00000007655(Cav1),ENSMUSG00000014599(Csf1),ENSMUSG00000018160(Med1),ENSMUSG00000019471(Cdc37),ENSMUSG00000020115(Tbk1),ENSMUSG00000020227(Irak3),ENSMUSG00000020696(Rffl),ENSMUSG00000020745(Pafah1b1),ENSMUSG00000021109(Hif1a),ENSMUSG00000021367(Edn1),ENSMUSG00000021457(Syk),ENSMUSG00000022906(Parp9),ENSMUSG00000024379(Tslp),ENSMUSG00000024539(Ptpn2),ENSMUSG0000002461…	ENSMUSG00000000440(Pparg),ENSMUSG00000021756(Il6st),ENSMUSG00000023826(Prkn),ENSMUSG00000028927(Padi2),ENSMUSG00000031077(Fadd),ENSMUSG00000031451(Gas6),ENSMUSG00000032586(Traip),ENSMUSG00000037523(Mavs),ENSMUSG00000042672(Dcst1),ENSMUSG00000045382(Cxcr4),ENSMUSG00000047798(Cd300lf),ENSMUSG00000048249(Crebrf),ENSMUSG00000051675(Trim32),ENSMUSG00000068854(H2bc21)
BP	GO:0045580	regulation of T cell differentiation	53	20	73	148	2.37103e-13	9.81617e-12	ENSMUSG00000000409(Lck),ENSMUSG00000001123(Lgals9),ENSMUSG00000002413(Braf),ENSMUSG00000004043(Stat5a),ENSMUSG00000015396(Cd83),ENSMUSG00000016206(H2-M3),ENSMUSG00000018899(Irf1),ENSMUSG00000019982(Myb),ENSMUSG00000021270(Hsp90aa1),ENSMUSG00000021457(Syk),ENSMUSG00000021686(Ap3b1),ENSMUSG00000022508(Bcl6),ENSMUSG00000024238(Zeb1),ENSMUSG00000024241(Sos1),ENSMUSG00000024334(H2-Oa),ENSMUSG000000245…	ENSMUSG00000000869(Il4),ENSMUSG00000003882(Il7r),ENSMUSG00000016493(Cd46),ENSMUSG00000017697(Ada),ENSMUSG00000025880(Smad7),ENSMUSG00000026012(Cd28),ENSMUSG00000026117(Zap70),ENSMUSG00000026842(Abl1),ENSMUSG00000027239(Mdk),ENSMUSG00000027387(Zc3h8),ENSMUSG00000029204(Rhoh),ENSMUSG00000031101(Sash3),ENSMUSG00000032440(Tgfbr2),ENSMUSG00000033767(Tmem131l),ENSMUSG00000036526(Card11),ENSMUSG00000039…
BP	GO:0070663	regulation of leukocyte proliferation	70	32	102	236	2.54408e-13	1.05062e-11	ENSMUSG00000000732(Icosl),ENSMUSG00000000791(Il12rb1),ENSMUSG00000001123(Lgals9),ENSMUSG00000004043(Stat5a),ENSMUSG00000004266(Ptpn6),ENSMUSG00000004296(Il12b),ENSMUSG00000004709(Cd244a),ENSMUSG00000014599(Csf1),ENSMUSG00000015316(Slamf1),ENSMUSG00000016206(H2-M3),ENSMUSG00000016496(Cd274),ENSMUSG00000016529(Il10),ENSMUSG00000017009(Sdc4),ENSMUSG00000017652(Cd40),ENSMUSG00000018899(Irf1),ENSMUSG0…	ENSMUSG00000000869(Il4),ENSMUSG00000002308(Cd320),ENSMUSG00000005583(Mef2c),ENSMUSG00000016493(Cd46),ENSMUSG00000017550(Atad5),ENSMUSG00000017697(Ada),ENSMUSG00000020167(Tcf3),ENSMUSG00000020399(Havcr2),ENSMUSG00000021756(Il6st),ENSMUSG00000022885(St6gal1),ENSMUSG00000023915(Tnfrsf21),ENSMUSG00000024978(Gpam),ENSMUSG00000024986(Hhex),ENSMUSG00000026012(Cd28),ENSMUSG00000026117(Zap70),ENSMUSG00000…
BP	GO:0035239	tube morphogenesis	171	116	287	886	2.59747e-13	1.06997e-11	ENSMUSG00000000247(Lhx2),ENSMUSG00000000555(Itga5),ENSMUSG00000000600(Krit1),ENSMUSG00000000628(Hk2),ENSMUSG00000000957(Mmp14),ENSMUSG00000001052(Sec24b),ENSMUSG00000001089(Luzp1),ENSMUSG00000001098(Kctd10),ENSMUSG00000001288(Rarg),ENSMUSG00000001300(Efnb2),ENSMUSG00000001435(Col18a1),ENSMUSG00000001632(Brpf1),ENSMUSG00000001768(Rin2),ENSMUSG00000002111(Spi1),ENSMUSG00000004040(Stat3),ENSMUSG0000…	ENSMUSG00000000440(Pparg),ENSMUSG00000001036(Epn2),ENSMUSG00000001761(Smo),ENSMUSG00000001827(Folr1),ENSMUSG00000002289(Angptl4),ENSMUSG00000004105(Angptl2),ENSMUSG00000004565(Pnpla6),ENSMUSG00000005469(Prkaca),ENSMUSG00000005583(Mef2c),ENSMUSG00000005958(Ephb3),ENSMUSG00000006235(Epor),ENSMUSG00000007613(Tgfbr1),ENSMUSG00000008855(Hdac5),ENSMUSG00000009621(Vav2),ENSMUSG00000010051(Hyal1),ENSMUSG…
BP	GO:0072359	circulatory system development	194	157	351	1129	2.84797e-13	1.17023e-11	ENSMUSG00000000555(Itga5),ENSMUSG00000000600(Krit1),ENSMUSG00000000628(Hk2),ENSMUSG00000000708(Kat2b),ENSMUSG00000000957(Mmp14),ENSMUSG00000001052(Sec24b),ENSMUSG00000001089(Luzp1),ENSMUSG00000001098(Kctd10),ENSMUSG00000001300(Efnb2),ENSMUSG00000001435(Col18a1),ENSMUSG00000001632(Brpf1),ENSMUSG00000001768(Rin2),ENSMUSG00000002111(Spi1),ENSMUSG00000004040(Stat3),ENSMUSG00000004296(Il12b),ENSMUSG00…	ENSMUSG00000000440(Pparg),ENSMUSG00000001036(Epn2),ENSMUSG00000001419(Mef2d),ENSMUSG00000001761(Smo),ENSMUSG00000001827(Folr1),ENSMUSG00000002289(Angptl4),ENSMUSG00000004099(Dnmt1),ENSMUSG00000004105(Angptl2),ENSMUSG00000004565(Pnpla6),ENSMUSG00000005534(Insr),ENSMUSG00000005583(Mef2c),ENSMUSG00000005958(Ephb3),ENSMUSG00000006235(Epor),ENSMUSG00000007613(Tgfbr1),ENSMUSG00000008855(Hdac5),ENSMUSG0…
BP	GO:0071396	cellular response to lipid	146	62	208	597	2.90314e-13	1.18992e-11	ENSMUSG00000000568(Hnrnpd),ENSMUSG00000000982(Ccl3),ENSMUSG00000001248(Gramd1a),ENSMUSG00000001288(Rarg),ENSMUSG00000002307(Daxx),ENSMUSG00000002602(Axl),ENSMUSG00000004296(Il12b),ENSMUSG00000005732(Ranbp1),ENSMUSG00000015305(Sash1),ENSMUSG00000016496(Cd274),ENSMUSG00000016529(Il10),ENSMUSG00000017652(Cd40),ENSMUSG00000018160(Med1),ENSMUSG00000018920(Cxcl16),ENSMUSG00000019782(Rwdd1),ENSMUSG00000…	ENSMUSG00000000440(Pparg),ENSMUSG00000001761(Smo),ENSMUSG00000005583(Mef2c),ENSMUSG00000005718(Tfap4),ENSMUSG00000005951(Shpk),ENSMUSG00000006728(Cdk4),ENSMUSG00000008855(Hdac5),ENSMUSG00000015846(Rxra),ENSMUSG00000017146(Brca1),ENSMUSG00000020399(Havcr2),ENSMUSG00000020654(Adcy3),ENSMUSG00000020889(Nr1d1),ENSMUSG00000021127(Zfp36l1),ENSMUSG00000021699(Pde4d),ENSMUSG00000022358(Fbxo32),ENSMUSG000…
BP	GO:0051272	positive regulation of cellular component movement	137	71	208	598	3.49588e-13	1.42931e-11	ENSMUSG00000000532(Acvr1b),ENSMUSG00000000555(Itga5),ENSMUSG00000000957(Mmp14),ENSMUSG00000000982(Ccl3),ENSMUSG00000001123(Lgals9),ENSMUSG00000001435(Col18a1),ENSMUSG00000001768(Rin2),ENSMUSG00000002233(Rhoc),ENSMUSG00000004040(Stat3),ENSMUSG00000004043(Stat5a),ENSMUSG00000004044(Cavin1),ENSMUSG00000004771(Rab11a),ENSMUSG00000004936(Map2k1),ENSMUSG00000005413(Hmox1),ENSMUSG00000006134(Crkl),ENSMU…	ENSMUSG00000000869(Il4),ENSMUSG00000001227(Sema6b),ENSMUSG00000001761(Smo),ENSMUSG00000005534(Insr),ENSMUSG00000007613(Tgfbr1),ENSMUSG00000010051(Hyal1),ENSMUSG00000014158(Trpv4),ENSMUSG00000016933(Plcg1),ENSMUSG00000018395(Kif3a),ENSMUSG00000019773(Fbxo5),ENSMUSG00000020689(Itgb3),ENSMUSG00000021365(Nedd9),ENSMUSG00000021508(Cxcl14),ENSMUSG00000021756(Il6st),ENSMUSG00000022367(Has2),ENSMUSG00000…
BP	GO:0051090	regulation of DNA-binding transcription factor activity	103	47	150	395	3.57761e-13	1.45909e-11	ENSMUSG00000000275(Trim25),ENSMUSG00000001627(Ifrd1),ENSMUSG00000003283(Hck),ENSMUSG00000003308(Keap1),ENSMUSG00000004040(Stat3),ENSMUSG00000004221(Ikbkg),ENSMUSG00000004535(Tax1bp1),ENSMUSG00000005413(Hmox1),ENSMUSG00000007655(Cav1),ENSMUSG00000016529(Il10),ENSMUSG00000017652(Cd40),ENSMUSG00000019782(Rwdd1),ENSMUSG00000019850(Tnfaip3),ENSMUSG00000020134(Peli1),ENSMUSG00000020227(Irak3),ENSMUSG00…	ENSMUSG00000000440(Pparg),ENSMUSG00000000869(Il4),ENSMUSG00000001761(Smo),ENSMUSG00000003575(Crtc1),ENSMUSG00000005102(Eif2ak4),ENSMUSG00000008855(Hdac5),ENSMUSG00000013483(Card14),ENSMUSG00000018548(Trim37),ENSMUSG00000018669(Cdk5rap3),ENSMUSG00000018909(Arrb1),ENSMUSG00000020167(Tcf3),ENSMUSG00000020399(Havcr2),ENSMUSG00000020888(Dvl2),ENSMUSG00000021108(Prkch),ENSMUSG00000023755(Rhebl1),ENSMUS…
BP	GO:0032880	regulation of protein localization	167	131	298	930	3.89193e-13	1.58336e-11	ENSMUSG00000000275(Trim25),ENSMUSG00000000957(Mmp14),ENSMUSG00000001300(Efnb2),ENSMUSG00000001416(Cct3),ENSMUSG00000001467(Cyp51),ENSMUSG00000003352(Cacnb3),ENSMUSG00000003948(Mmd),ENSMUSG00000004296(Il12b),ENSMUSG00000004451(Ralb),ENSMUSG00000004771(Rab11a),ENSMUSG00000004936(Map2k1),ENSMUSG00000005763(Cd247),ENSMUSG00000006005(Tpr),ENSMUSG00000006134(Crkl),ENSMUSG00000006740(Kif5b),ENSMUSG00000…	ENSMUSG00000000631(Myo18a),ENSMUSG00000001761(Smo),ENSMUSG00000002083(Bbc3),ENSMUSG00000002625(Akap8l),ENSMUSG00000003346(Abhd17a),ENSMUSG00000003452(Bicd1),ENSMUSG00000004347(Pde1c),ENSMUSG00000004768(Rab23),ENSMUSG00000005469(Prkaca),ENSMUSG00000005699(Pard6a),ENSMUSG00000010047(Hyal2),ENSMUSG00000017146(Brca1),ENSMUSG00000017716(Birc5),ENSMUSG00000018395(Kif3a),ENSMUSG00000018398(Septin8),ENSM…
BP	GO:0015031	protein transport	255	223	478	1627	3.98643e-13	1.6178e-11	ENSMUSG00000001052(Sec24b),ENSMUSG00000001300(Efnb2),ENSMUSG00000001440(Kpnb1),ENSMUSG00000001467(Cyp51),ENSMUSG00000001786(Fbxo7),ENSMUSG00000003226(Ranbp2),ENSMUSG00000003352(Cacnb3),ENSMUSG00000003746(Man1a),ENSMUSG00000004040(Stat3),ENSMUSG00000004044(Cavin1),ENSMUSG00000004296(Il12b),ENSMUSG00000004446(Bid),ENSMUSG00000004771(Rab11a),ENSMUSG00000006005(Tpr),ENSMUSG00000006058(Snf8),ENSMUSG00…	ENSMUSG00000000440(Pparg),ENSMUSG00000000631(Myo18a),ENSMUSG00000001143(Lman2l),ENSMUSG00000001761(Smo),ENSMUSG00000001827(Folr1),ENSMUSG00000002031(Ift46),ENSMUSG00000002083(Bbc3),ENSMUSG00000002625(Akap8l),ENSMUSG00000002910(Arrdc2),ENSMUSG00000003134(Tbc1d8),ENSMUSG00000004347(Pde1c),ENSMUSG00000004768(Rab23),ENSMUSG00000005469(Prkaca),ENSMUSG00000005699(Pard6a),ENSMUSG00000006464(Bbs1),ENSMUS…
BP	GO:0120031	plasma membrane bounded cell projection assembly	67	116	183	510	4.12551e-13	1.67012e-11	ENSMUSG00000007655(Cav1),ENSMUSG00000008892(Vdac3),ENSMUSG00000017831(Rab5a),ENSMUSG00000018736(Ndel1),ENSMUSG00000020024(Cep83),ENSMUSG00000020152(Actr2),ENSMUSG00000020476(Dbnl),ENSMUSG00000021270(Hsp90aa1),ENSMUSG00000021823(Vcl),ENSMUSG00000021948(Prkcd),ENSMUSG00000022200(Golph3),ENSMUSG00000022262(Dnah5),ENSMUSG00000022272(Myo10),ENSMUSG00000022377(Asap1),ENSMUSG00000024143(Rhoq),ENSMUSG000…	ENSMUSG00000001482(Def8),ENSMUSG00000002031(Ift46),ENSMUSG00000002486(Tchp),ENSMUSG00000004530(Coro1c),ENSMUSG00000004768(Rab23),ENSMUSG00000006435(Neurl1a),ENSMUSG00000006464(Bbs1),ENSMUSG00000007613(Tgfbr1),ENSMUSG00000009621(Vav2),ENSMUSG00000011832(Evi5l),ENSMUSG00000012609(Ttll5),ENSMUSG00000014232(Cluap1),ENSMUSG00000015766(Eps8),ENSMUSG00000018199(Ro60),ENSMUSG00000018395(Kif3a),ENSMUSG000…
BP	GO:0007265	Ras protein signal transduction	82	45	127	319	4.86076e-13	1.96293e-11	ENSMUSG00000001098(Kctd10),ENSMUSG00000001440(Kpnb1),ENSMUSG00000003269(Cyth2),ENSMUSG00000004364(Cul3),ENSMUSG00000004451(Ralb),ENSMUSG00000004936(Map2k1),ENSMUSG00000004952(Rasa4),ENSMUSG00000005057(Sh2b2),ENSMUSG00000009376(Met),ENSMUSG00000009630(Ppp2cb),ENSMUSG00000014599(Csf1),ENSMUSG00000017776(Crk),ENSMUSG00000018334(Ksr1),ENSMUSG00000020121(Srgap1),ENSMUSG00000020476(Dbnl),ENSMUSG0000002…	ENSMUSG00000000149(Gna12),ENSMUSG00000004099(Dnmt1),ENSMUSG00000015697(Setdb1),ENSMUSG00000015766(Eps8),ENSMUSG00000017466(Timp2),ENSMUSG00000018909(Arrb1),ENSMUSG00000019478(Rab4a),ENSMUSG00000019852(Arfgef3),ENSMUSG00000022105(Rb1),ENSMUSG00000022469(Rapgef3),ENSMUSG00000022722(Arl6),ENSMUSG00000025372(Baiap2),ENSMUSG00000026271(Gpr35),ENSMUSG00000026842(Abl1),ENSMUSG00000028832(Stmn1),ENSMUSG0…
BP	GO:0043547	positive regulation of GTPase activity	78	63	141	366	5.12724e-13	2.06547e-11	ENSMUSG00000000982(Ccl3),ENSMUSG00000001768(Rin2),ENSMUSG00000003226(Ranbp2),ENSMUSG00000004936(Map2k1),ENSMUSG00000004952(Rasa4),ENSMUSG00000005732(Ranbp1),ENSMUSG00000006134(Crkl),ENSMUSG00000009185(Ccl8),ENSMUSG00000017631(Abr),ENSMUSG00000017652(Cd40),ENSMUSG00000017776(Crk),ENSMUSG00000018736(Ndel1),ENSMUSG00000018930(Ccl4),ENSMUSG00000019122(Ccl9),ENSMUSG00000020121(Srgap1),ENSMUSG000000205…	ENSMUSG00000001995(Sipa1l2),ENSMUSG00000003134(Tbc1d8),ENSMUSG00000004530(Coro1c),ENSMUSG00000004633(Chn2),ENSMUSG00000010057(Nprl2),ENSMUSG00000011832(Evi5l),ENSMUSG00000018909(Arrb1),ENSMUSG00000019790(Stxbp5),ENSMUSG00000020888(Dvl2),ENSMUSG00000021365(Nedd9),ENSMUSG00000021368(Tbc1d7),ENSMUSG00000022469(Rapgef3),ENSMUSG00000023015(Racgap1),ENSMUSG00000023353(Agap3),ENSMUSG00000023921(Mmut),EN…
BP	GO:0007346	regulation of mitotic cell cycle	77	94	171	470	6.3244e-13	2.54151e-11	ENSMUSG00000000184(Ccnd2),ENSMUSG00000001786(Fbxo7),ENSMUSG00000004043(Stat5a),ENSMUSG00000004085(Map3k20),ENSMUSG00000004266(Ptpn6),ENSMUSG00000004364(Cul3),ENSMUSG00000004446(Bid),ENSMUSG00000004591(Pkn2),ENSMUSG00000004771(Rab11a),ENSMUSG00000005732(Ranbp1),ENSMUSG00000006005(Tpr),ENSMUSG00000017291(Taok1),ENSMUSG00000018707(Dync1h1),ENSMUSG00000020020(Usp44),ENSMUSG00000020122(Egfr),ENSMUSG00…	ENSMUSG00000002871(Tpra1),ENSMUSG00000003518(Dusp3),ENSMUSG00000005534(Insr),ENSMUSG00000005718(Tfap4),ENSMUSG00000006728(Cdk4),ENSMUSG00000007646(Rad51c),ENSMUSG00000010051(Hyal1),ENSMUSG00000012483(Rpa3),ENSMUSG00000017146(Brca1),ENSMUSG00000017466(Timp2),ENSMUSG00000017550(Atad5),ENSMUSG00000017716(Birc5),ENSMUSG00000018669(Cdk5rap3),ENSMUSG00000019773(Fbxo5),ENSMUSG00000019942(Cdk1),ENSMUSG00…
BP	GO:0043123	positive regulation of I-kappaB kinase/NF-kappaB signaling	57	12	69	139	7.2056e-13	2.88857e-11	ENSMUSG00000000275(Trim25),ENSMUSG00000004221(Ikbkg),ENSMUSG00000015755(Tab2),ENSMUSG00000017652(Cd40),ENSMUSG00000019842(Traf3ip2),ENSMUSG00000020075(Ddx21),ENSMUSG00000020115(Tbk1),ENSMUSG00000020134(Peli1),ENSMUSG00000020275(Rel),ENSMUSG00000022255(Mtdh),ENSMUSG00000024401(Tnf),ENSMUSG00000024610(Cd74),ENSMUSG00000024927(Rela),ENSMUSG00000025888(Casp1),ENSMUSG00000026029(Casp8),ENSMUSG00000026…	ENSMUSG00000022178(Ajuba),ENSMUSG00000023826(Prkn),ENSMUSG00000025736(Jmjd8),ENSMUSG00000026228(Htr2b),ENSMUSG00000026842(Abl1),ENSMUSG00000028756(Pink1),ENSMUSG00000031077(Fadd),ENSMUSG00000033430(Terf2ip),ENSMUSG00000036526(Card11),ENSMUSG00000041000(Trim62),ENSMUSG00000051675(Trim32),ENSMUSG00000052336(Cx3cr1)
BP	GO:0001961	positive regulation of cytokine-mediated signaling pathway	26	8	34	48	7.41817e-13	2.96654e-11	ENSMUSG00000002602(Axl),ENSMUSG00000014599(Csf1),ENSMUSG00000018160(Med1),ENSMUSG00000020115(Tbk1),ENSMUSG00000020745(Pafah1b1),ENSMUSG00000021109(Hif1a),ENSMUSG00000021367(Edn1),ENSMUSG00000022906(Parp9),ENSMUSG00000024379(Tslp),ENSMUSG00000024610(Cd74),ENSMUSG00000025498(Irf7),ENSMUSG00000025888(Casp1),ENSMUSG00000026942(Traf2),ENSMUSG00000027514(Zbp1),ENSMUSG00000029275(Gfi1),ENSMUSG0000003353…	ENSMUSG00000023826(Prkn),ENSMUSG00000031077(Fadd),ENSMUSG00000031451(Gas6),ENSMUSG00000037523(Mavs),ENSMUSG00000045382(Cxcr4),ENSMUSG00000047798(Cd300lf),ENSMUSG00000048249(Crebrf),ENSMUSG00000051675(Trim32)
BP	GO:0060759	regulation of response to cytokine stimulus	50	14	64	125	8.07085e-13	3.21972e-11	ENSMUSG00000002602(Axl),ENSMUSG00000007655(Cav1),ENSMUSG00000014599(Csf1),ENSMUSG00000018160(Med1),ENSMUSG00000019471(Cdc37),ENSMUSG00000020115(Tbk1),ENSMUSG00000020227(Irak3),ENSMUSG00000020696(Rffl),ENSMUSG00000020745(Pafah1b1),ENSMUSG00000021109(Hif1a),ENSMUSG00000021367(Edn1),ENSMUSG00000021457(Syk),ENSMUSG00000022906(Parp9),ENSMUSG00000024379(Tslp),ENSMUSG00000024539(Ptpn2),ENSMUSG0000002461…	ENSMUSG00000000440(Pparg),ENSMUSG00000021756(Il6st),ENSMUSG00000023826(Prkn),ENSMUSG00000028927(Padi2),ENSMUSG00000031077(Fadd),ENSMUSG00000031451(Gas6),ENSMUSG00000032586(Traip),ENSMUSG00000037523(Mavs),ENSMUSG00000042672(Dcst1),ENSMUSG00000045382(Cxcr4),ENSMUSG00000047798(Cd300lf),ENSMUSG00000048249(Crebrf),ENSMUSG00000051675(Trim32),ENSMUSG00000068854(H2bc21)
BP	GO:0050896	response to stimulus	1319	1005	2324	9581	8.46402e-13	3.36839e-11	ENSMUSG00000000001(Gnai3),ENSMUSG00000000184(Ccnd2),ENSMUSG00000000204(Slfn4),ENSMUSG00000000247(Lhx2),ENSMUSG00000000275(Trim25),ENSMUSG00000000409(Lck),ENSMUSG00000000532(Acvr1b),ENSMUSG00000000555(Itga5),ENSMUSG00000000568(Hnrnpd),ENSMUSG00000000628(Hk2),ENSMUSG00000000682(Cd52),ENSMUSG00000000708(Kat2b),ENSMUSG00000000732(Icosl),ENSMUSG00000000776(Polr3d),ENSMUSG00000000791(Il12rb1),ENSMUSG00…	ENSMUSG00000000028(Cdc45),ENSMUSG00000000149(Gna12),ENSMUSG00000000282(Mnt),ENSMUSG00000000326(Comt),ENSMUSG00000000440(Pparg),ENSMUSG00000000631(Myo18a),ENSMUSG00000000673(Haao),ENSMUSG00000000751(Rpa1),ENSMUSG00000000869(Il4),ENSMUSG00000001036(Epn2),ENSMUSG00000001227(Sema6b),ENSMUSG00000001228(Uhrf1),ENSMUSG00000001366(Fbxo9),ENSMUSG00000001436(Slc19a1),ENSMUSG00000001482(Def8),ENSMUSG0000000…
BP	GO:0060760	positive regulation of response to cytokine stimulus	29	8	37	55	8.89949e-13	3.53314e-11	ENSMUSG00000002602(Axl),ENSMUSG00000014599(Csf1),ENSMUSG00000018160(Med1),ENSMUSG00000020115(Tbk1),ENSMUSG00000020745(Pafah1b1),ENSMUSG00000021109(Hif1a),ENSMUSG00000021367(Edn1),ENSMUSG00000022906(Parp9),ENSMUSG00000024379(Tslp),ENSMUSG00000024610(Cd74),ENSMUSG00000025498(Irf7),ENSMUSG00000025888(Casp1),ENSMUSG00000026896(Ifih1),ENSMUSG00000026942(Traf2),ENSMUSG00000027514(Zbp1),ENSMUSG000000279…	ENSMUSG00000023826(Prkn),ENSMUSG00000031077(Fadd),ENSMUSG00000031451(Gas6),ENSMUSG00000037523(Mavs),ENSMUSG00000045382(Cxcr4),ENSMUSG00000047798(Cd300lf),ENSMUSG00000048249(Crebrf),ENSMUSG00000051675(Trim32)
BP	GO:0002699	positive regulation of immune effector process	74	23	97	225	1.16718e-12	4.61149e-11	ENSMUSG00000004043(Stat5a),ENSMUSG00000004296(Il12b),ENSMUSG00000004709(Cd244a),ENSMUSG00000005413(Hmox1),ENSMUSG00000015947(Fcgr1),ENSMUSG00000016206(H2-M3),ENSMUSG00000016529(Il10),ENSMUSG00000017652(Cd40),ENSMUSG00000017830(Dhx58),ENSMUSG00000018500(Adora2b),ENSMUSG00000018899(Irf1),ENSMUSG00000019982(Myb),ENSMUSG00000020075(Ddx21),ENSMUSG00000020124(Usp15),ENSMUSG00000020641(Rsad2),ENSMUSG000…	ENSMUSG00000000631(Myo18a),ENSMUSG00000000869(Il4),ENSMUSG00000016493(Cd46),ENSMUSG00000017550(Atad5),ENSMUSG00000018752(Tnfsfm13),ENSMUSG00000020263(Appl2),ENSMUSG00000024151(Msh2),ENSMUSG00000026012(Cd28),ENSMUSG00000026471(Mr1),ENSMUSG00000027843(Ptpn22),ENSMUSG00000029468(P2rx7),ENSMUSG00000031077(Fadd),ENSMUSG00000031101(Sash3),ENSMUSG00000032498(Mlh1),ENSMUSG00000034652(Cd300a),ENSMUSG00000…
BP	GO:0051056	regulation of small GTPase mediated signal transduction	60	37	97	225	1.16718e-12	4.61149e-11	ENSMUSG00000001098(Kctd10),ENSMUSG00000003269(Cyth2),ENSMUSG00000004364(Cul3),ENSMUSG00000004936(Map2k1),ENSMUSG00000004952(Rasa4),ENSMUSG00000005057(Sh2b2),ENSMUSG00000009376(Met),ENSMUSG00000009630(Ppp2cb),ENSMUSG00000014599(Csf1),ENSMUSG00000017776(Crk),ENSMUSG00000020573(Pik3cg),ENSMUSG00000021675(F2rl2),ENSMUSG00000021895(Arhgef3),ENSMUSG00000022508(Bcl6),ENSMUSG00000024043(Arhgap28),ENSMUSG…	ENSMUSG00000001995(Sipa1l2),ENSMUSG00000004633(Chn2),ENSMUSG00000015766(Eps8),ENSMUSG00000017466(Timp2),ENSMUSG00000018909(Arrb1),ENSMUSG00000019852(Arfgef3),ENSMUSG00000025154(Arhgap19),ENSMUSG00000026271(Gpr35),ENSMUSG00000026842(Abl1),ENSMUSG00000028832(Stmn1),ENSMUSG00000030047(Arhgap25),ENSMUSG00000030134(Rasgef1a),ENSMUSG00000031214(Ophn1),ENSMUSG00000031453(Rasa3),ENSMUSG00000031785(Adgrg1…
BP	GO:0048872	homeostasis of number of cells	77	48	125	316	1.26032e-12	4.96755e-11	ENSMUSG00000000532(Acvr1b),ENSMUSG00000002111(Spi1),ENSMUSG00000002602(Axl),ENSMUSG00000004040(Stat3),ENSMUSG00000004043(Stat5a),ENSMUSG00000004221(Ikbkg),ENSMUSG00000005057(Sh2b2),ENSMUSG00000005413(Hmox1),ENSMUSG00000005686(Ampd3),ENSMUSG00000014599(Csf1),ENSMUSG00000017978(Cadps2),ENSMUSG00000018160(Med1),ENSMUSG00000018654(Ikzf1),ENSMUSG00000019850(Tnfaip3),ENSMUSG00000019982(Myb),ENSMUSG0000…	ENSMUSG00000000751(Rpa1),ENSMUSG00000001761(Smo),ENSMUSG00000003812(Dnase2a),ENSMUSG00000003882(Il7r),ENSMUSG00000005583(Mef2c),ENSMUSG00000017697(Ada),ENSMUSG00000018395(Kif3a),ENSMUSG00000018669(Cdk5rap3),ENSMUSG00000020167(Tcf3),ENSMUSG00000021048(Mthfd1),ENSMUSG00000021127(Zfp36l1),ENSMUSG00000022105(Rb1),ENSMUSG00000022526(Zfp251),ENSMUSG00000022672(Prkdc),ENSMUSG00000024140(Epas1),ENSMUSG00…
CC	GO:0045335	phagocytic vesicle	43	14	57	107	1.3244e-12	5.20763e-11	ENSMUSG00000004771(Rab11a),ENSMUSG00000006740(Kif5b),ENSMUSG00000015316(Slamf1),ENSMUSG00000015340(Cybb),ENSMUSG00000017831(Rab5a),ENSMUSG00000019832(Rab32),ENSMUSG00000020671(Rab10),ENSMUSG00000021457(Syk),ENSMUSG00000023460(Rab12),ENSMUSG00000024308(Tapbp),ENSMUSG00000024743(Syt7),ENSMUSG00000025278(Flnb),ENSMUSG00000026425(Srgap2),ENSMUSG00000026470(Stx6),ENSMUSG00000026797(Stxbp1),ENSMUSG0000…	ENSMUSG00000000631(Myo18a),ENSMUSG00000004567(Mcoln1),ENSMUSG00000004768(Rab23),ENSMUSG00000020263(Appl2),ENSMUSG00000020546(Stxbp4),ENSMUSG00000028221(Pip4p2),ENSMUSG00000028456(Unc13b),ENSMUSG00000031988(Vps26b),ENSMUSG00000035354(Uvrag),ENSMUSG00000037526(Atg14),ENSMUSG00000051343(Rab11fip5),ENSMUSG00000052688(Rab7b),ENSMUSG00000055069(Rab39),ENSMUSG00000068923(Syt11)
BP	GO:0071496	cellular response to external stimulus	75	59	134	347	1.57909e-12	6.19424e-11	ENSMUSG00000002602(Axl),ENSMUSG00000003352(Cacnb3),ENSMUSG00000004451(Ralb),ENSMUSG00000005413(Hmox1),ENSMUSG00000007655(Cav1),ENSMUSG00000015340(Cybb),ENSMUSG00000015839(Nfe2l2),ENSMUSG00000017652(Cd40),ENSMUSG00000017737(Mmp9),ENSMUSG00000017978(Cadps2),ENSMUSG00000018160(Med1),ENSMUSG00000018500(Adora2b),ENSMUSG00000018899(Irf1),ENSMUSG00000020122(Egfr),ENSMUSG00000020184(Mdm2),ENSMUSG00000020…	ENSMUSG00000000326(Comt),ENSMUSG00000000440(Pparg),ENSMUSG00000001827(Folr1),ENSMUSG00000002289(Angptl4),ENSMUSG00000005102(Eif2ak4),ENSMUSG00000005374(Tbl2),ENSMUSG00000010057(Nprl2),ENSMUSG00000010663(Fads1),ENSMUSG00000015944(Castor2),ENSMUSG00000020032(Nuak1),ENSMUSG00000020424(Castor1),ENSMUSG00000020647(Ncoa1),ENSMUSG00000021250(Fos),ENSMUSG00000021476(Habp4),ENSMUSG00000021754(Map3k1),ENSM…
BP	GO:0050729	positive regulation of inflammatory response	56	13	69	141	1.71697e-12	6.71908e-11	ENSMUSG00000000982(Ccl3),ENSMUSG00000002897(Il17ra),ENSMUSG00000004040(Stat3),ENSMUSG00000004043(Stat5a),ENSMUSG00000010358(Ifi35),ENSMUSG00000015947(Fcgr1),ENSMUSG00000018500(Adora2b),ENSMUSG00000020122(Egfr),ENSMUSG00000020400(Tnip1),ENSMUSG00000020573(Pik3cg),ENSMUSG00000021025(Nfkbia),ENSMUSG00000022808(Snx4),ENSMUSG00000022892(App),ENSMUSG00000023088(Abcc1),ENSMUSG00000024164(C3),ENSMUSG0000…	ENSMUSG00000001741(Il16),ENSMUSG00000010047(Hyal2),ENSMUSG00000014158(Trpv4),ENSMUSG00000024975(Pdcd4),ENSMUSG00000026012(Cd28),ENSMUSG00000027239(Mdk),ENSMUSG00000031565(Fgfr1),ENSMUSG00000034957(Cebpa),ENSMUSG00000038481(Cdk19),ENSMUSG00000041343(Ankrd42),ENSMUSG00000044968(Napepld),ENSMUSG00000049709(Nlrp10),ENSMUSG00000062515(Fabp4)
BP	GO:0062207	regulation of pattern recognition receptor signaling pathway	38	13	51	91	1.86868e-12	7.29539e-11	ENSMUSG00000005312(Ubqln1),ENSMUSG00000007655(Cav1),ENSMUSG00000010358(Ifi35),ENSMUSG00000017830(Dhx58),ENSMUSG00000018899(Irf1),ENSMUSG00000019850(Tnfaip3),ENSMUSG00000020124(Usp15),ENSMUSG00000020134(Peli1),ENSMUSG00000020227(Irak3),ENSMUSG00000020641(Rsad2),ENSMUSG00000022892(App),ENSMUSG00000024404(Riok3),ENSMUSG00000024737(Slc15a3),ENSMUSG00000025017(Pik3ap1),ENSMUSG00000025058(Tasl),ENSMUSG…	ENSMUSG00000013236(Ptprs),ENSMUSG00000020263(Appl2),ENSMUSG00000020823(Sec14l1),ENSMUSG00000020889(Nr1d1),ENSMUSG00000021356(Irf4),ENSMUSG00000027843(Ptpn22),ENSMUSG00000032109(Nlrx1),ENSMUSG00000034652(Cd300a),ENSMUSG00000035900(Gramd4),ENSMUSG00000047798(Cd300lf),ENSMUSG00000050132(Sarm1),ENSMUSG00000052688(Rab7b),ENSMUSG00000070056(Mfhas1)
CC	GO:0098588	bounding membrane of organelle	246	232	478	1651	2.05226e-12	7.9931e-11	ENSMUSG00000000001(Gnai3),ENSMUSG00000000628(Hk2),ENSMUSG00000000915(Hip1r),ENSMUSG00000001052(Sec24b),ENSMUSG00000001175(Calm1),ENSMUSG00000002103(Acp2),ENSMUSG00000002105(Slc39a13),ENSMUSG00000002847(Pla1a),ENSMUSG00000003746(Man1a),ENSMUSG00000003948(Mmd),ENSMUSG00000004317(Clcn5),ENSMUSG00000004364(Cul3),ENSMUSG00000004446(Bid),ENSMUSG00000004771(Rab11a),ENSMUSG00000005802(Slc30a4),ENSMUSG000…	ENSMUSG00000000631(Myo18a),ENSMUSG00000000876(Pxmp4),ENSMUSG00000001036(Epn2),ENSMUSG00000001143(Lman2l),ENSMUSG00000001761(Smo),ENSMUSG00000002031(Ift46),ENSMUSG00000003153(Slc2a3),ENSMUSG00000003346(Abhd17a),ENSMUSG00000004071(Cdip1),ENSMUSG00000004530(Coro1c),ENSMUSG00000004567(Mcoln1),ENSMUSG00000005534(Insr),ENSMUSG00000005949(Ctns),ENSMUSG00000006362(Cbfa2t3),ENSMUSG00000006464(Bbs1),ENSMUS…
BP	GO:0046634	regulation of alpha-beta T cell activation	38	14	52	94	2.26115e-12	8.78588e-11	ENSMUSG00000001123(Lgals9),ENSMUSG00000004296(Il12b),ENSMUSG00000004709(Cd244a),ENSMUSG00000015396(Cd83),ENSMUSG00000016496(Cd274),ENSMUSG00000018899(Irf1),ENSMUSG00000019982(Myb),ENSMUSG00000020178(Adora2a),ENSMUSG00000021457(Syk),ENSMUSG00000021686(Ap3b1),ENSMUSG00000022508(Bcl6),ENSMUSG00000024098(Twsg1),ENSMUSG00000024659(Anxa1),ENSMUSG00000025383(Il23a),ENSMUSG00000025746(Il6),ENSMUSG0000002…	ENSMUSG00000000869(Il4),ENSMUSG00000017697(Ada),ENSMUSG00000025880(Smad7),ENSMUSG00000026012(Cd28),ENSMUSG00000026117(Zap70),ENSMUSG00000027843(Ptpn22),ENSMUSG00000029657(Hsph1),ENSMUSG00000030528(Blm),ENSMUSG00000031101(Sash3),ENSMUSG00000032440(Tgfbr2),ENSMUSG00000034652(Cd300a),ENSMUSG00000039521(Foxp3),ENSMUSG00000052142(Rasal3),ENSMUSG00000066687(Zbtb16)
BP	GO:0045934	negative regulation of nucleobase-containing compound metabolic process	233	228	461	1576	2.30079e-12	8.91882e-11	ENSMUSG00000000568(Hnrnpd),ENSMUSG00000000708(Kat2b),ENSMUSG00000000730(Dnmt3l),ENSMUSG00000001156(Mxd1),ENSMUSG00000001288(Rarg),ENSMUSG00000002111(Spi1),ENSMUSG00000002307(Daxx),ENSMUSG00000002578(Ikzf4),ENSMUSG00000002881(Nab1),ENSMUSG00000002983(Relb),ENSMUSG00000003382(Etv3),ENSMUSG00000004040(Stat3),ENSMUSG00000004364(Cul3),ENSMUSG00000005774(Rfx5),ENSMUSG00000006005(Tpr),ENSMUSG00000006310…	ENSMUSG00000000028(Cdc45),ENSMUSG00000000282(Mnt),ENSMUSG00000000440(Pparg),ENSMUSG00000000869(Il4),ENSMUSG00000001120(Pcbp3),ENSMUSG00000001228(Uhrf1),ENSMUSG00000001761(Smo),ENSMUSG00000002968(Med25),ENSMUSG00000004099(Dnmt1),ENSMUSG00000005045(Chd5),ENSMUSG00000005370(Msh6),ENSMUSG00000005583(Mef2c),ENSMUSG00000005718(Tfap4),ENSMUSG00000005893(Nr2c2),ENSMUSG00000006019(Dhx34),ENSMUSG0000000636…
BP	GO:0040017	positive regulation of locomotion	135	69	204	594	2.3167e-12	8.95936e-11	ENSMUSG00000000532(Acvr1b),ENSMUSG00000000555(Itga5),ENSMUSG00000000957(Mmp14),ENSMUSG00000000982(Ccl3),ENSMUSG00000001123(Lgals9),ENSMUSG00000001435(Col18a1),ENSMUSG00000001768(Rin2),ENSMUSG00000002233(Rhoc),ENSMUSG00000004040(Stat3),ENSMUSG00000004043(Stat5a),ENSMUSG00000004044(Cavin1),ENSMUSG00000004771(Rab11a),ENSMUSG00000004936(Map2k1),ENSMUSG00000005413(Hmox1),ENSMUSG00000006134(Crkl),ENSMU…	ENSMUSG00000000869(Il4),ENSMUSG00000001227(Sema6b),ENSMUSG00000001741(Il16),ENSMUSG00000001761(Smo),ENSMUSG00000005534(Insr),ENSMUSG00000007613(Tgfbr1),ENSMUSG00000010051(Hyal1),ENSMUSG00000014158(Trpv4),ENSMUSG00000016933(Plcg1),ENSMUSG00000019773(Fbxo5),ENSMUSG00000020689(Itgb3),ENSMUSG00000021365(Nedd9),ENSMUSG00000021508(Cxcl14),ENSMUSG00000021756(Il6st),ENSMUSG00000022367(Has2),ENSMUSG000000…
BP	GO:0009719	response to endogenous stimulus	278	204	482	1660	2.43327e-12	9.38807e-11	ENSMUSG00000000001(Gnai3),ENSMUSG00000000568(Hnrnpd),ENSMUSG00000000708(Kat2b),ENSMUSG00000000957(Mmp14),ENSMUSG00000001175(Calm1),ENSMUSG00000001288(Rarg),ENSMUSG00000001663(Gstt1),ENSMUSG00000002307(Daxx),ENSMUSG00000002413(Braf),ENSMUSG00000003206(Ebi3),ENSMUSG00000003665(Has1),ENSMUSG00000004040(Stat3),ENSMUSG00000004043(Stat5a),ENSMUSG00000004446(Bid),ENSMUSG00000004936(Map2k1),ENSMUSG000000…	ENSMUSG00000000440(Pparg),ENSMUSG00000000869(Il4),ENSMUSG00000001827(Folr1),ENSMUSG00000003518(Dusp3),ENSMUSG00000004099(Dnmt1),ENSMUSG00000005469(Prkaca),ENSMUSG00000005514(Por),ENSMUSG00000005534(Insr),ENSMUSG00000005583(Mef2c),ENSMUSG00000005718(Tfap4),ENSMUSG00000006344(Ggt5),ENSMUSG00000006435(Neurl1a),ENSMUSG00000006728(Cdk4),ENSMUSG00000006800(Sulf2),ENSMUSG00000007613(Tgfbr1),ENSMUSG00000…
BP	GO:0000122	negative regulation of transcription by RNA polymerase II	138	158	296	936	2.66257e-12	1.02487e-10	ENSMUSG00000001156(Mxd1),ENSMUSG00000001288(Rarg),ENSMUSG00000002111(Spi1),ENSMUSG00000003382(Etv3),ENSMUSG00000004364(Cul3),ENSMUSG00000005774(Rfx5),ENSMUSG00000006005(Tpr),ENSMUSG00000006310(Zbtb32),ENSMUSG00000007655(Cav1),ENSMUSG00000008976(Gabpa),ENSMUSG00000015837(Sqstm1),ENSMUSG00000017548(Suz12),ENSMUSG00000018143(Mafk),ENSMUSG00000018160(Med1),ENSMUSG00000018654(Ikzf1),ENSMUSG00000019982…	ENSMUSG00000000282(Mnt),ENSMUSG00000000440(Pparg),ENSMUSG00000000869(Il4),ENSMUSG00000001120(Pcbp3),ENSMUSG00000001228(Uhrf1),ENSMUSG00000001761(Smo),ENSMUSG00000002968(Med25),ENSMUSG00000004099(Dnmt1),ENSMUSG00000005045(Chd5),ENSMUSG00000005583(Mef2c),ENSMUSG00000005893(Nr2c2),ENSMUSG00000006362(Cbfa2t3),ENSMUSG00000007613(Tgfbr1),ENSMUSG00000008305(Tle1),ENSMUSG00000008855(Hdac5),ENSMUSG0000001…
BP	GO:0044772	mitotic cell cycle phase transition	65	76	141	373	2.70937e-12	1.04045e-10	ENSMUSG00000000184(Ccnd2),ENSMUSG00000000532(Acvr1b),ENSMUSG00000001175(Calm1),ENSMUSG00000001786(Fbxo7),ENSMUSG00000004266(Ptpn6),ENSMUSG00000004364(Cul3),ENSMUSG00000004446(Bid),ENSMUSG00000004771(Rab11a),ENSMUSG00000006005(Tpr),ENSMUSG00000016477(E2f3),ENSMUSG00000017291(Taok1),ENSMUSG00000017561(Crlf3),ENSMUSG00000019982(Myb),ENSMUSG00000020020(Usp44),ENSMUSG00000020122(Egfr),ENSMUSG000000201…	ENSMUSG00000002871(Tpra1),ENSMUSG00000005718(Tfap4),ENSMUSG00000006728(Cdk4),ENSMUSG00000007080(Pole),ENSMUSG00000007646(Rad51c),ENSMUSG00000010051(Hyal1),ENSMUSG00000015766(Eps8),ENSMUSG00000017146(Brca1),ENSMUSG00000017550(Atad5),ENSMUSG00000017716(Birc5),ENSMUSG00000018669(Cdk5rap3),ENSMUSG00000019773(Fbxo5),ENSMUSG00000019942(Cdk1),ENSMUSG00000020167(Tcf3),ENSMUSG00000020263(Appl2),ENSMUSG000…
BP	GO:2000147	positive regulation of cell motility	133	66	199	577	2.78909e-12	1.06857e-10	ENSMUSG00000000532(Acvr1b),ENSMUSG00000000555(Itga5),ENSMUSG00000000957(Mmp14),ENSMUSG00000000982(Ccl3),ENSMUSG00000001123(Lgals9),ENSMUSG00000001435(Col18a1),ENSMUSG00000001768(Rin2),ENSMUSG00000002233(Rhoc),ENSMUSG00000004040(Stat3),ENSMUSG00000004043(Stat5a),ENSMUSG00000004044(Cavin1),ENSMUSG00000004771(Rab11a),ENSMUSG00000004936(Map2k1),ENSMUSG00000005413(Hmox1),ENSMUSG00000006134(Crkl),ENSMU…	ENSMUSG00000000869(Il4),ENSMUSG00000001227(Sema6b),ENSMUSG00000001761(Smo),ENSMUSG00000005534(Insr),ENSMUSG00000007613(Tgfbr1),ENSMUSG00000010051(Hyal1),ENSMUSG00000014158(Trpv4),ENSMUSG00000016933(Plcg1),ENSMUSG00000019773(Fbxo5),ENSMUSG00000020689(Itgb3),ENSMUSG00000021365(Nedd9),ENSMUSG00000021508(Cxcl14),ENSMUSG00000021756(Il6st),ENSMUSG00000022367(Has2),ENSMUSG00000022469(Rapgef3),ENSMUSG000…
BP	GO:0051248	negative regulation of protein metabolic process	218	129	347	1133	3.41332e-12	1.30468e-10	ENSMUSG00000000568(Hnrnpd),ENSMUSG00000000708(Kat2b),ENSMUSG00000000838(Fmr1),ENSMUSG00000000983(Wfdc18),ENSMUSG00000001467(Cyp51),ENSMUSG00000001785(Pwp1),ENSMUSG00000001786(Fbxo7),ENSMUSG00000002111(Spi1),ENSMUSG00000002227(Mov10),ENSMUSG00000002997(Prkar2b),ENSMUSG00000004040(Stat3),ENSMUSG00000004266(Ptpn6),ENSMUSG00000005087(Cd44),ENSMUSG00000006005(Tpr),ENSMUSG00000006134(Crkl),ENSMUSG00000…	ENSMUSG00000003190(Bcl2l12),ENSMUSG00000003518(Dusp3),ENSMUSG00000004099(Dnmt1),ENSMUSG00000004530(Coro1c),ENSMUSG00000005102(Eif2ak4),ENSMUSG00000005514(Por),ENSMUSG00000005534(Insr),ENSMUSG00000005699(Pard6a),ENSMUSG00000005718(Tfap4),ENSMUSG00000010047(Hyal2),ENSMUSG00000013622(Atraid),ENSMUSG00000017146(Brca1),ENSMUSG00000017466(Timp2),ENSMUSG00000017716(Birc5),ENSMUSG00000018428(Akap1),ENSMU…
BP	GO:1902532	negative regulation of intracellular signal transduction	106	75	181	514	3.65291e-12	1.39302e-10	ENSMUSG00000001098(Kctd10),ENSMUSG00000001175(Calm1),ENSMUSG00000003208(Yju2),ENSMUSG00000004221(Ikbkg),ENSMUSG00000004266(Ptpn6),ENSMUSG00000004364(Cul3),ENSMUSG00000004446(Bid),ENSMUSG00000004936(Map2k1),ENSMUSG00000004952(Rasa4),ENSMUSG00000005087(Cd44),ENSMUSG00000006818(Sod2),ENSMUSG00000007411(Mark3),ENSMUSG00000007655(Cav1),ENSMUSG00000009376(Met),ENSMUSG00000009630(Ppp2cb),ENSMUSG00000010…	ENSMUSG00000003190(Bcl2l12),ENSMUSG00000003518(Dusp3),ENSMUSG00000008305(Tle1),ENSMUSG00000010047(Hyal2),ENSMUSG00000010057(Nprl2),ENSMUSG00000015944(Castor2),ENSMUSG00000017466(Timp2),ENSMUSG00000017550(Atad5),ENSMUSG00000018669(Cdk5rap3),ENSMUSG00000018849(Wwc1),ENSMUSG00000018909(Arrb1),ENSMUSG00000019960(Dusp6),ENSMUSG00000020424(Castor1),ENSMUSG00000020823(Sec14l1),ENSMUSG00000020889(Nr1d1),…
BP	GO:0001525	angiogenesis	114	70	184	525	3.87557e-12	1.46839e-10	ENSMUSG00000000555(Itga5),ENSMUSG00000000600(Krit1),ENSMUSG00000000628(Hk2),ENSMUSG00000000957(Mmp14),ENSMUSG00000001098(Kctd10),ENSMUSG00000001300(Efnb2),ENSMUSG00000001435(Col18a1),ENSMUSG00000004040(Stat3),ENSMUSG00000004296(Il12b),ENSMUSG00000005413(Hmox1),ENSMUSG00000007655(Cav1),ENSMUSG00000013076(Amotl1),ENSMUSG00000014773(Dll1),ENSMUSG00000015305(Sash1),ENSMUSG00000015340(Cybb),ENSMUSG000…	ENSMUSG00000000440(Pparg),ENSMUSG00000001036(Epn2),ENSMUSG00000002289(Angptl4),ENSMUSG00000004105(Angptl2),ENSMUSG00000004565(Pnpla6),ENSMUSG00000005958(Ephb3),ENSMUSG00000007613(Tgfbr1),ENSMUSG00000008855(Hdac5),ENSMUSG00000009621(Vav2),ENSMUSG00000010051(Hyal1),ENSMUSG00000015846(Rxra),ENSMUSG00000016933(Plcg1),ENSMUSG00000017146(Brca1),ENSMUSG00000017417(Plxdc1),ENSMUSG00000018983(E2f2),ENSMUS…
BP	GO:0000165	MAPK cascade	155	98	253	777	3.87735e-12	1.46839e-10	ENSMUSG00000000982(Ccl3),ENSMUSG00000002413(Braf),ENSMUSG00000003119(Cdk12),ENSMUSG00000004085(Map3k20),ENSMUSG00000004266(Ptpn6),ENSMUSG00000004936(Map2k1),ENSMUSG00000005087(Cd44),ENSMUSG00000006134(Crkl),ENSMUSG00000007655(Cav1),ENSMUSG00000009185(Ccl8),ENSMUSG00000012519(Mlkl),ENSMUSG00000015305(Sash1),ENSMUSG00000015312(Gadd45b),ENSMUSG00000015316(Slamf1),ENSMUSG00000015950(Ncf1),ENSMUSG0000…	ENSMUSG00000003518(Dusp3),ENSMUSG00000005534(Insr),ENSMUSG00000005583(Mef2c),ENSMUSG00000005893(Nr2c2),ENSMUSG00000006235(Epor),ENSMUSG00000007613(Tgfbr1),ENSMUSG00000010047(Hyal2),ENSMUSG00000014158(Trpv4),ENSMUSG00000014426(Map3k4),ENSMUSG00000017119(Nbr1),ENSMUSG00000017466(Timp2),ENSMUSG00000018669(Cdk5rap3),ENSMUSG00000018849(Wwc1),ENSMUSG00000018909(Arrb1),ENSMUSG00000019960(Dusp6),ENSMUSG0…
BP	GO:0023014	signal transduction by protein phosphorylation	155	98	253	777	3.87735e-12	1.46839e-10	ENSMUSG00000000982(Ccl3),ENSMUSG00000002413(Braf),ENSMUSG00000003119(Cdk12),ENSMUSG00000004085(Map3k20),ENSMUSG00000004266(Ptpn6),ENSMUSG00000004936(Map2k1),ENSMUSG00000005087(Cd44),ENSMUSG00000006134(Crkl),ENSMUSG00000007655(Cav1),ENSMUSG00000009185(Ccl8),ENSMUSG00000012519(Mlkl),ENSMUSG00000015305(Sash1),ENSMUSG00000015312(Gadd45b),ENSMUSG00000015316(Slamf1),ENSMUSG00000015950(Ncf1),ENSMUSG0000…	ENSMUSG00000003518(Dusp3),ENSMUSG00000005534(Insr),ENSMUSG00000005583(Mef2c),ENSMUSG00000005893(Nr2c2),ENSMUSG00000006235(Epor),ENSMUSG00000007613(Tgfbr1),ENSMUSG00000010047(Hyal2),ENSMUSG00000014158(Trpv4),ENSMUSG00000014426(Map3k4),ENSMUSG00000017119(Nbr1),ENSMUSG00000017466(Timp2),ENSMUSG00000018669(Cdk5rap3),ENSMUSG00000018849(Wwc1),ENSMUSG00000018909(Arrb1),ENSMUSG00000019960(Dusp6),ENSMUSG0…
BP	GO:0045582	positive regulation of T cell differentiation	39	13	52	95	3.92726e-12	1.48387e-10	ENSMUSG00000000409(Lck),ENSMUSG00000001123(Lgals9),ENSMUSG00000004043(Stat5a),ENSMUSG00000015396(Cd83),ENSMUSG00000016206(H2-M3),ENSMUSG00000018899(Irf1),ENSMUSG00000019982(Myb),ENSMUSG00000021270(Hsp90aa1),ENSMUSG00000021457(Syk),ENSMUSG00000021686(Ap3b1),ENSMUSG00000022508(Bcl6),ENSMUSG00000024610(Cd74),ENSMUSG00000024659(Anxa1),ENSMUSG00000025383(Il23a),ENSMUSG00000025746(Il6),ENSMUSG000000263…	ENSMUSG00000000869(Il4),ENSMUSG00000003882(Il7r),ENSMUSG00000016493(Cd46),ENSMUSG00000017697(Ada),ENSMUSG00000026117(Zap70),ENSMUSG00000027239(Mdk),ENSMUSG00000029204(Rhoh),ENSMUSG00000031101(Sash3),ENSMUSG00000032440(Tgfbr2),ENSMUSG00000039521(Foxp3),ENSMUSG00000051817(Sox12),ENSMUSG00000066687(Zbtb16),ENSMUSG00000076431(Sox4)
BP	GO:0044265	cellular macromolecule catabolic process	209	120	329	1065	4.02513e-12	1.51736e-10	ENSMUSG00000000275(Trim25),ENSMUSG00000000568(Hnrnpd),ENSMUSG00000001098(Kctd10),ENSMUSG00000001786(Fbxo7),ENSMUSG00000002227(Mov10),ENSMUSG00000003308(Keap1),ENSMUSG00000003746(Man1a),ENSMUSG00000004364(Cul3),ENSMUSG00000005312(Ubqln1),ENSMUSG00000005779(Psmb4),ENSMUSG00000006058(Snf8),ENSMUSG00000006418(Rnf114),ENSMUSG00000007655(Cav1),ENSMUSG00000008393(Carhsp1),ENSMUSG00000009630(Ppp2cb),ENSM…	ENSMUSG00000000149(Gna12),ENSMUSG00000001054(Rmnd5b),ENSMUSG00000001228(Uhrf1),ENSMUSG00000001366(Fbxo9),ENSMUSG00000003812(Dnase2a),ENSMUSG00000005043(Sgsh),ENSMUSG00000005469(Prkaca),ENSMUSG00000006019(Dhx34),ENSMUSG00000006362(Cbfa2t3),ENSMUSG00000013622(Atraid),ENSMUSG00000014164(Klhl3),ENSMUSG00000014470(Rnf166),ENSMUSG00000015337(Endog),ENSMUSG00000016552(Foxred2),ENSMUSG00000018669(Cdk5rap…
BP	GO:0042127	regulation of cell population proliferation	283	207	490	1697	4.08957e-12	1.53532e-10	ENSMUSG00000000001(Gnai3),ENSMUSG00000000184(Ccnd2),ENSMUSG00000000247(Lhx2),ENSMUSG00000000409(Lck),ENSMUSG00000000600(Krit1),ENSMUSG00000000708(Kat2b),ENSMUSG00000000732(Icosl),ENSMUSG00000000791(Il12rb1),ENSMUSG00000001123(Lgals9),ENSMUSG00000001288(Rarg),ENSMUSG00000001300(Efnb2),ENSMUSG00000001435(Col18a1),ENSMUSG00000001632(Brpf1),ENSMUSG00000001707(Eef1e1),ENSMUSG00000002413(Braf),ENSMUSG0…	ENSMUSG00000000149(Gna12),ENSMUSG00000000326(Comt),ENSMUSG00000000440(Pparg),ENSMUSG00000000751(Rpa1),ENSMUSG00000000869(Il4),ENSMUSG00000001228(Uhrf1),ENSMUSG00000001419(Mef2d),ENSMUSG00000001761(Smo),ENSMUSG00000002308(Cd320),ENSMUSG00000002731(Prkra),ENSMUSG00000002968(Med25),ENSMUSG00000003282(Plag1),ENSMUSG00000003882(Il7r),ENSMUSG00000004099(Dnmt1),ENSMUSG00000005045(Chd5),ENSMUSG0000000546…
BP	GO:0009896	positive regulation of catabolic process	98	65	163	451	4.09143e-12	1.53532e-10	ENSMUSG00000000001(Gnai3),ENSMUSG00000000568(Hnrnpd),ENSMUSG00000000628(Hk2),ENSMUSG00000001786(Fbxo7),ENSMUSG00000002227(Mov10),ENSMUSG00000004221(Ikbkg),ENSMUSG00000004446(Bid),ENSMUSG00000004451(Ralb),ENSMUSG00000004936(Map2k1),ENSMUSG00000005312(Ubqln1),ENSMUSG00000005413(Hmox1),ENSMUSG00000006058(Snf8),ENSMUSG00000007655(Cav1),ENSMUSG00000019471(Cdc37),ENSMUSG00000019850(Tnfaip3),ENSMUSG0000…	ENSMUSG00000000869(Il4),ENSMUSG00000004798(Ulk2),ENSMUSG00000005102(Eif2ak4),ENSMUSG00000005534(Insr),ENSMUSG00000006362(Cbfa2t3),ENSMUSG00000010057(Nprl2),ENSMUSG00000015337(Endog),ENSMUSG00000021127(Zfp36l1),ENSMUSG00000021236(Entpd5),ENSMUSG00000021482(Prxl2c),ENSMUSG00000022051(Bnip3l),ENSMUSG00000022433(Csnk1e),ENSMUSG00000022708(Zbtb20),ENSMUSG00000023019(Gpd1),ENSMUSG00000023826(Prkn),ENSM…
BP	GO:0016032	viral process	91	35	126	324	4.13681e-12	1.54881e-10	ENSMUSG00000000275(Trim25),ENSMUSG00000000385(Tmprss2),ENSMUSG00000000982(Ccl3),ENSMUSG00000001166(Oas1c),ENSMUSG00000001168(Oas1h),ENSMUSG00000002602(Axl),ENSMUSG00000002845(Tmem39a),ENSMUSG00000004591(Pkn2),ENSMUSG00000006058(Snf8),ENSMUSG00000006411(Nectin4),ENSMUSG00000007655(Cav1),ENSMUSG00000017002(Slpi),ENSMUSG00000017737(Mmp9),ENSMUSG00000017831(Rab5a),ENSMUSG00000018362(Kpna2),ENSMUSG000…	ENSMUSG00000003452(Bicd1),ENSMUSG00000005102(Eif2ak4),ENSMUSG00000005534(Insr),ENSMUSG00000005718(Tfap4),ENSMUSG00000006235(Epor),ENSMUSG00000010047(Hyal2),ENSMUSG00000010051(Hyal1),ENSMUSG00000015846(Rxra),ENSMUSG00000020689(Itgb3),ENSMUSG00000023826(Prkn),ENSMUSG00000024413(Npc1),ENSMUSG00000026469(Xpr1),ENSMUSG00000026792(Lrsam1),ENSMUSG00000027315(Spint1),ENSMUSG00000030314(Atg7),ENSMUSG00000…
BP	GO:0002573	myeloid leukocyte differentiation	62	32	94	220	4.82736e-12	1.80324e-10	ENSMUSG00000000248(Clec2g),ENSMUSG00000000982(Ccl3),ENSMUSG00000002111(Spi1),ENSMUSG00000002983(Relb),ENSMUSG00000003070(Efna2),ENSMUSG00000004043(Stat5a),ENSMUSG00000004296(Il12b),ENSMUSG00000008193(Spib),ENSMUSG00000014599(Csf1),ENSMUSG00000018160(Med1),ENSMUSG00000018916(Csf2),ENSMUSG00000020745(Pafah1b1),ENSMUSG00000021686(Ap3b1),ENSMUSG00000022303(Dcstamp),ENSMUSG00000022346(Myc),ENSMUSG0000…	ENSMUSG00000000440(Pparg),ENSMUSG00000000869(Il4),ENSMUSG00000005583(Mef2c),ENSMUSG00000006362(Cbfa2t3),ENSMUSG00000020689(Itgb3),ENSMUSG00000021127(Zfp36l1),ENSMUSG00000021250(Fos),ENSMUSG00000021356(Irf4),ENSMUSG00000022105(Rb1),ENSMUSG00000024986(Hhex),ENSMUSG00000026288(Inpp5d),ENSMUSG00000027339(Rassf2),ENSMUSG00000028086(Fbxw7),ENSMUSG00000028101(Pias3),ENSMUSG00000028717(Tal1),ENSMUSG00000…
CC	GO:0098805	whole membrane	231	184	415	1410	5.77106e-12	2.15086e-10	ENSMUSG00000000001(Gnai3),ENSMUSG00000000409(Lck),ENSMUSG00000000628(Hk2),ENSMUSG00000000915(Hip1r),ENSMUSG00000001052(Sec24b),ENSMUSG00000001175(Calm1),ENSMUSG00000002103(Acp2),ENSMUSG00000002699(Lcp2),ENSMUSG00000002847(Pla1a),ENSMUSG00000002997(Prkar2b),ENSMUSG00000003123(Lipe),ENSMUSG00000003226(Ranbp2),ENSMUSG00000003283(Hck),ENSMUSG00000003948(Mmd),ENSMUSG00000004044(Cavin1),ENSMUSG00000004…	ENSMUSG00000000876(Pxmp4),ENSMUSG00000001036(Epn2),ENSMUSG00000001761(Smo),ENSMUSG00000003153(Slc2a3),ENSMUSG00000003346(Abhd17a),ENSMUSG00000004071(Cdip1),ENSMUSG00000004530(Coro1c),ENSMUSG00000004567(Mcoln1),ENSMUSG00000004798(Ulk2),ENSMUSG00000005469(Prkaca),ENSMUSG00000005534(Insr),ENSMUSG00000005949(Ctns),ENSMUSG00000007613(Tgfbr1),ENSMUSG00000009090(Ap1b1),ENSMUSG00000009894(Snap47),ENSMUSG…
BP	GO:0045944	positive regulation of transcription by RNA polymerase II	207	172	379	1262	6.06636e-12	2.25581e-10	ENSMUSG00000000078(Klf6),ENSMUSG00000000247(Lhx2),ENSMUSG00000000532(Acvr1b),ENSMUSG00000000568(Hnrnpd),ENSMUSG00000000708(Kat2b),ENSMUSG00000000982(Ccl3),ENSMUSG00000001288(Rarg),ENSMUSG00000001542(Ell2),ENSMUSG00000001627(Ifrd1),ENSMUSG00000002111(Spi1),ENSMUSG00000002578(Ikzf4),ENSMUSG00000002658(Gtf2f1),ENSMUSG00000002983(Relb),ENSMUSG00000003119(Cdk12),ENSMUSG00000004040(Stat3),ENSMUSG000000…	ENSMUSG00000000440(Pparg),ENSMUSG00000000869(Il4),ENSMUSG00000001419(Mef2d),ENSMUSG00000001761(Smo),ENSMUSG00000002617(Zfp40),ENSMUSG00000002625(Akap8l),ENSMUSG00000002968(Med25),ENSMUSG00000003190(Bcl2l12),ENSMUSG00000003282(Plag1),ENSMUSG00000003575(Crtc1),ENSMUSG00000003992(Ssbp2),ENSMUSG00000004151(Etv1),ENSMUSG00000005583(Mef2c),ENSMUSG00000005718(Tfap4),ENSMUSG00000005893(Nr2c2),ENSMUSG0000…
BP	GO:0042098	T cell proliferation	63	26	89	205	6.15403e-12	2.28324e-10	ENSMUSG00000000732(Icosl),ENSMUSG00000000791(Il12rb1),ENSMUSG00000001123(Lgals9),ENSMUSG00000003206(Ebi3),ENSMUSG00000004043(Stat5a),ENSMUSG00000004266(Ptpn6),ENSMUSG00000004296(Il12b),ENSMUSG00000004709(Cd244a),ENSMUSG00000006310(Zbtb32),ENSMUSG00000015316(Slamf1),ENSMUSG00000016206(H2-M3),ENSMUSG00000016496(Cd274),ENSMUSG00000017009(Sdc4),ENSMUSG00000018899(Irf1),ENSMUSG00000020134(Peli1),ENSMU…	ENSMUSG00000000869(Il4),ENSMUSG00000016493(Cd46),ENSMUSG00000020399(Havcr2),ENSMUSG00000021756(Il6st),ENSMUSG00000023915(Tnfrsf21),ENSMUSG00000023927(Satb1),ENSMUSG00000024978(Gpam),ENSMUSG00000025510(Cd151),ENSMUSG00000026012(Cd28),ENSMUSG00000026117(Zap70),ENSMUSG00000026842(Abl1),ENSMUSG00000027843(Ptpn22),ENSMUSG00000029468(P2rx7),ENSMUSG00000029554(Mad1l1),ENSMUSG00000029869(Ephb6),ENSMUSG00…
BP	GO:0051253	negative regulation of RNA metabolic process	223	210	433	1476	7.35898e-12	2.72415e-10	ENSMUSG00000000568(Hnrnpd),ENSMUSG00000000708(Kat2b),ENSMUSG00000000730(Dnmt3l),ENSMUSG00000001156(Mxd1),ENSMUSG00000001288(Rarg),ENSMUSG00000002111(Spi1),ENSMUSG00000002307(Daxx),ENSMUSG00000002578(Ikzf4),ENSMUSG00000002881(Nab1),ENSMUSG00000002983(Relb),ENSMUSG00000003382(Etv3),ENSMUSG00000004040(Stat3),ENSMUSG00000004364(Cul3),ENSMUSG00000005774(Rfx5),ENSMUSG00000006005(Tpr),ENSMUSG00000006310…	ENSMUSG00000000028(Cdc45),ENSMUSG00000000282(Mnt),ENSMUSG00000000440(Pparg),ENSMUSG00000000869(Il4),ENSMUSG00000001120(Pcbp3),ENSMUSG00000001228(Uhrf1),ENSMUSG00000001761(Smo),ENSMUSG00000002968(Med25),ENSMUSG00000004099(Dnmt1),ENSMUSG00000005045(Chd5),ENSMUSG00000005583(Mef2c),ENSMUSG00000005718(Tfap4),ENSMUSG00000005893(Nr2c2),ENSMUSG00000006019(Dhx34),ENSMUSG00000006362(Cbfa2t3),ENSMUSG0000000…
BP	GO:0019058	viral life cycle	73	26	99	238	8.94685e-12	3.3045e-10	ENSMUSG00000000275(Trim25),ENSMUSG00000000385(Tmprss2),ENSMUSG00000001166(Oas1c),ENSMUSG00000001168(Oas1h),ENSMUSG00000002602(Axl),ENSMUSG00000002845(Tmem39a),ENSMUSG00000004591(Pkn2),ENSMUSG00000006058(Snf8),ENSMUSG00000006411(Nectin4),ENSMUSG00000007655(Cav1),ENSMUSG00000017002(Slpi),ENSMUSG00000017831(Rab5a),ENSMUSG00000018362(Kpna2),ENSMUSG00000019868(Vta1),ENSMUSG00000020580(Rock2),ENSMUSG00…	ENSMUSG00000005102(Eif2ak4),ENSMUSG00000010047(Hyal2),ENSMUSG00000010051(Hyal1),ENSMUSG00000020689(Itgb3),ENSMUSG00000023826(Prkn),ENSMUSG00000024413(Npc1),ENSMUSG00000026469(Xpr1),ENSMUSG00000026792(Lrsam1),ENSMUSG00000027315(Spint1),ENSMUSG00000030314(Atg7),ENSMUSG00000031451(Gas6),ENSMUSG00000034216(Vps18),ENSMUSG00000034317(Trim59),ENSMUSG00000035354(Uvrag),ENSMUSG00000037523(Mavs),ENSMUSG000…
BP	GO:0032943	mononuclear cell proliferation	81	39	120	307	8.99858e-12	3.31616e-10	ENSMUSG00000000732(Icosl),ENSMUSG00000000791(Il12rb1),ENSMUSG00000001123(Lgals9),ENSMUSG00000003206(Ebi3),ENSMUSG00000004043(Stat5a),ENSMUSG00000004266(Ptpn6),ENSMUSG00000004296(Il12b),ENSMUSG00000004709(Cd244a),ENSMUSG00000006310(Zbtb32),ENSMUSG00000014599(Csf1),ENSMUSG00000015316(Slamf1),ENSMUSG00000016206(H2-M3),ENSMUSG00000016496(Cd274),ENSMUSG00000016529(Il10),ENSMUSG00000017009(Sdc4),ENSMUS…	ENSMUSG00000000869(Il4),ENSMUSG00000002308(Cd320),ENSMUSG00000003882(Il7r),ENSMUSG00000005583(Mef2c),ENSMUSG00000016493(Cd46),ENSMUSG00000017550(Atad5),ENSMUSG00000017697(Ada),ENSMUSG00000020167(Tcf3),ENSMUSG00000020399(Havcr2),ENSMUSG00000021756(Il6st),ENSMUSG00000022885(St6gal1),ENSMUSG00000023915(Tnfrsf21),ENSMUSG00000023927(Satb1),ENSMUSG00000024978(Gpam),ENSMUSG00000025510(Cd151),ENSMUSG0000…
MF	GO:0140096	catalytic activity, acting on a protein	354	263	617	2219	9.45089e-12	3.47505e-10	ENSMUSG00000000275(Trim25),ENSMUSG00000000385(Tmprss2),ENSMUSG00000000409(Lck),ENSMUSG00000000532(Acvr1b),ENSMUSG00000000957(Mmp14),ENSMUSG00000000982(Ccl3),ENSMUSG00000001098(Kctd10),ENSMUSG00000001441(Npepps),ENSMUSG00000001630(Stk38l),ENSMUSG00000002103(Acp2),ENSMUSG00000002413(Braf),ENSMUSG00000002602(Axl),ENSMUSG00000003119(Cdk12),ENSMUSG00000003226(Ranbp2),ENSMUSG00000003283(Hck),ENSMUSG000…	ENSMUSG00000001054(Rmnd5b),ENSMUSG00000001228(Uhrf1),ENSMUSG00000001865(Cpa3),ENSMUSG00000002109(Ddb2),ENSMUSG00000002228(Ppm1j),ENSMUSG00000002329(Mdp1),ENSMUSG00000002409(Dyrk1b),ENSMUSG00000003346(Abhd17a),ENSMUSG00000003421(Nosip),ENSMUSG00000003518(Dusp3),ENSMUSG00000004798(Ulk2),ENSMUSG00000004933(Matk),ENSMUSG00000005102(Eif2ak4),ENSMUSG00000005469(Prkaca),ENSMUSG00000005534(Insr),ENSMUSG0…
[truncated: 15,989 more rows]
