# Supplementary material for: Transcriptomics and quantitative proteomics reveal changes after second stimulation of bone marrow-derived macrophages from lupus-prone MRL/lpr mice
Source: Front Immunol. 2022 Oct 19;13:1004232. doi: 10.3389/fimmu.2022.1004232 (PMC9627492; doi:10.3389/fimmu.2022.1004232)
Supplement: Supplementary file 9 [file Table_9.xlsx]

## Sheet: Sheet1
PathwayID	Pathway	Level1	Level2	Up_number	Down_number	DEG_number	total_number	Pvalue	FDR	Up_gene	Down_gene	URL
mmu04668	TNF signaling pathway	Environmental Information Processing	Signal transduction	62	7	69	108	1.2995e-18	4.09341e-16	ENSMUSG00000053113(Socs3),ENSMUSG00000028599(Tnfrsf1b),ENSMUSG00000018899(Irf1),ENSMUSG00000035385(Ccl2),ENSMUSG00000078920(Ifi47),ENSMUSG00000021025(Nfkbia),ENSMUSG00000026582(Sele),ENSMUSG00000026942(Traf2),ENSMUSG00000043613(Mmp3),ENSMUSG00000026166(Ccl20),ENSMUSG00000029380(Cxcl1),ENSMUSG00000041417(Pik3r1),ENSMUSG00000027962(Vcam1),ENSMUSG00000039936(Pik3cd),ENSMUSG00000019850(Tnfaip3),ENSMU…	ENSMUSG00000022414(Tab1),ENSMUSG00000037316(Bag4),ENSMUSG00000031077(Fadd),ENSMUSG00000052684(Jun),ENSMUSG00000031834(Pik3r2),ENSMUSG00000038648(Creb3l2),ENSMUSG00000021250(Fos)	http://www.kegg.jp/kegg-bin/show_pathway?map04668/K09444%09%23FFFFFF,red/K10165%09%23FFFFFF,red/K02373%09%23FFFFFF,green/K04368%09%23FFFFFF,red/K11859%09%23FFFFFF,red/K06490%09%23FFFFFF,red/K04379%09%23FFFFFF,green/K14624%09%23FFFFFF,red/K17065%09%23FFFFFF,red/K04415%09%23FFFFFF,red/K05419%09%23FFFFFF,red/K03158%09%23FFFFFF,red/K05141%09%23FFFFFF,red/K05427%09%23FFFFFF,red/K03172%09%23FFFFFF,red/…
mmu05169	Epstein-Barr virus infection	Human Diseases	Infectious diseases: Viral	91	19	110	219	2.51839e-17	3.96647e-15	ENSMUSG00000053137(Mapk11),ENSMUSG00000024927(Rela),ENSMUSG00000015755(Tab2),ENSMUSG00000040296(Ddx58),ENSMUSG00000039041(Adrm1),ENSMUSG00000021457(Syk),ENSMUSG00000024778(Fas),ENSMUSG00000031609(Sap30),ENSMUSG00000035929(H2-Q4),ENSMUSG00000056116(H2-T22),ENSMUSG00000025746(Il6),ENSMUSG00000092243(Gm7030),ENSMUSG00000026914(Psmd14),ENSMUSG00000005763(Cd247),ENSMUSG00000022967(Ifnar1),ENSMUSG00000…	ENSMUSG00000027490(E2f1),ENSMUSG00000021453(Gadd45g),ENSMUSG00000002109(Ddb2),ENSMUSG00000031077(Fadd),ENSMUSG00000054115(Skp2),ENSMUSG00000022414(Tab1),ENSMUSG00000006728(Cdk4),ENSMUSG00000070348(Ccnd1),ENSMUSG00000037523(Mavs),ENSMUSG00000022105(Rb1),ENSMUSG00000018983(E2f2),ENSMUSG00000028914(Casp9),ENSMUSG00000041777(Cir1),ENSMUSG00000048120(Entpd1),ENSMUSG00000021668(Polk),ENSMUSG00000031834…	http://www.kegg.jp/kegg-bin/show_pathway?map05169/K06490%09%23FFFFFF,red/K14021%09%23FFFFFF,red/K04402%09%23FFFFFF,purple/K01510%09%23FFFFFF,green/K06256%09%23FFFFFF,red/K02084%09%23FFFFFF,red/K04735%09%23FFFFFF,red/K11220%09%23FFFFFF,red/K05654%09%23FFFFFF,red/K02581%09%23FFFFFF,red/K07210%09%23FFFFFF,red/K04430%09%23FFFFFF,red/K08738%09%23FFFFFF,red/K11219%09%23FFFFFF,red/K05872%09%23FFFFFF,red…
mmu05168	Herpes simplex infection	Human Diseases	Infectious diseases: Viral	86	15	101	205	2.63488e-15	2.76663e-13	ENSMUSG00000066861(Oas1g),ENSMUSG00000020246(Hcfc2),ENSMUSG00000025498(Irf7),ENSMUSG00000024334(H2-Oa),ENSMUSG00000024079(Eif2ak2),ENSMUSG00000010097(Nxf1),ENSMUSG00000021025(Nfkbia),ENSMUSG00000026942(Traf2),ENSMUSG00000041538(H2-Ob),ENSMUSG00000032508(Myd88),ENSMUSG00000047123(Ticam1),ENSMUSG00000067297(Ifit1bl2),ENSMUSG00000016283(H2-M2),ENSMUSG00000063694(Cycs),ENSMUSG00000024339(Tap2),ENSMUS…	ENSMUSG00000054115(Skp2),ENSMUSG00000022414(Tab1),ENSMUSG00000066800(Rnasel),ENSMUSG00000060261(Gtf2i),ENSMUSG00000005102(Eif2ak4),ENSMUSG00000028957(Per3),ENSMUSG00000031668(Eif2ak3),ENSMUSG00000023079(Gtf2ird1),ENSMUSG00000031077(Fadd),ENSMUSG00000005198(Polr2a),ENSMUSG00000025358(Cdk2),ENSMUSG00000052684(Jun),ENSMUSG00000019942(Cdk1),ENSMUSG00000021250(Fos),ENSMUSG00000037523(Mavs)	http://www.kegg.jp/kegg-bin/show_pathway?map05168/K08738%09%23FFFFFF,red/K05405%09%23FFFFFF,red/K12499%09%23FFFFFF,red/K03172%09%23FFFFFF,red/K03173%09%23FFFFFF,red/K07210%09%23FFFFFF,red/K02206%09%23FFFFFF,green/K04398%09%23FFFFFF,red/K04693%09%23FFFFFF,red/K03156%09%23FFFFFF,red/K07211%09%23FFFFFF,red/K14624%09%23FFFFFF,red/K21945%09%23FFFFFF,green/K05415%09%23FFFFFF,red/K03006%09%23FFFFFF,gree…
mmu04621	NOD-like receptor signaling pathway	Organismal Systems	Immune system	70	13	83	167	4.30536e-13	3.39047e-11	ENSMUSG00000033538(Casp4),ENSMUSG00000073490(Ifi207),ENSMUSG00000064289(Tank),ENSMUSG00000026029(Casp8),ENSMUSG00000025888(Casp1),ENSMUSG00000026104(Stat1),ENSMUSG00000022534(Mefv),ENSMUSG00000057367(Birc2),ENSMUSG00000028367(Txn1),ENSMUSG00000030595(Nfkbib),ENSMUSG00000024960(Plcb3),ENSMUSG00000021948(Prkcd),ENSMUSG00000028270(Gbp2),ENSMUSG00000055994(Nod2),ENSMUSG00000105504(Gbp5),ENSMUSG000000…	ENSMUSG00000037523(Mavs),ENSMUSG00000042644(Itpr3),ENSMUSG00000052684(Jun),ENSMUSG00000040061(Plcb2),ENSMUSG00000031077(Fadd),ENSMUSG00000029468(P2rx7),ENSMUSG00000070390(Nlrp1b),ENSMUSG00000041849(Card6),ENSMUSG00000021640(Naip1),ENSMUSG00000029338(Antxr2),ENSMUSG00000032109(Nlrx1),ENSMUSG00000066800(Rnasel),ENSMUSG00000022414(Tab1)	http://www.kegg.jp/kegg-bin/show_pathway?map04621/K20917%09%23FFFFFF,red/K01165%09%23FFFFFF,green/K01370%09%23FFFFFF,red/K02580%09%23FFFFFF,red/K20898%09%23FFFFFF,red/K11220%09%23FFFFFF,red/K06068%09%23FFFFFF,red/K03671%09%23FFFFFF,red/K10165%09%23FFFFFF,red/K04729%09%23FFFFFF,red/K05415%09%23FFFFFF,red/K03156%09%23FFFFFF,red/K12650%09%23FFFFFF,red/K08846%09%23FFFFFF,red/K05130%09%23FFFFFF,red/K0…
mmu05164	Influenza A	Human Diseases	Infectious diseases: Viral	74	10	84	171	7.07773e-13	4.45897e-11	ENSMUSG00000041538(H2-Ob),ENSMUSG00000021025(Nfkbia),ENSMUSG00000010097(Nxf1),ENSMUSG00000024079(Eif2ak2),ENSMUSG00000024334(H2-Oa),ENSMUSG00000025498(Irf7),ENSMUSG00000032691(Nlrp3),ENSMUSG00000066861(Oas1g),ENSMUSG00000063550(Nup98),ENSMUSG00000063694(Cycs),ENSMUSG00000039936(Pik3cd),ENSMUSG00000047123(Ticam1),ENSMUSG00000041417(Pik3r1),ENSMUSG00000032508(Myd88),ENSMUSG00000073421(H2-Ab1),ENSMU…	ENSMUSG00000066800(Rnasel),ENSMUSG00000032109(Nlrx1),ENSMUSG00000005102(Eif2ak4),ENSMUSG00000031668(Eif2ak3),ENSMUSG00000023150(Ivns1abp),ENSMUSG00000059970(Hspa2),ENSMUSG00000031834(Pik3r2),ENSMUSG00000052684(Jun),ENSMUSG00000037523(Mavs),ENSMUSG00000028914(Casp9)	http://www.kegg.jp/kegg-bin/show_pathway?map05164/K15045%09%23FFFFFF,red/K11221%09%23FFFFFF,red/K11220%09%23FFFFFF,red/K05405%09%23FFFFFF,red/K07211%09%23FFFFFF,red/K02649%09%23FFFFFF,purple/K11219%09%23FFFFFF,red/K05406%09%23FFFFFF,red/K15046%09%23FFFFFF,green/K14216%09%23FFFFFF,red/K05130%09%23FFFFFF,red/K05131%09%23FFFFFF,red/K05842%09%23FFFFFF,red/K12968%09%23FFFFFF,red/K15044%09%23FFFFFF,red…
mmu05160	Hepatitis C	Human Diseases	Infectious diseases: Viral	61	16	77	159	1.56998e-11	7.04572e-10	ENSMUSG00000028163(Nfkb1),ENSMUSG00000052776(Oas1a),ENSMUSG00000032690(Oas2),ENSMUSG00000040033(Stat2),ENSMUSG00000009630(Ppp2cb),ENSMUSG00000034459(Ifit1),ENSMUSG00000024241(Sos1),ENSMUSG00000042349(Ikbke),ENSMUSG00000020641(Rsad2),ENSMUSG00000053113(Socs3),ENSMUSG00000020115(Tbk1),ENSMUSG00000078652(Psme3),ENSMUSG00000024079(Eif2ak2),ENSMUSG00000040274(Cdk6),ENSMUSG00000028698(Pik3r3),ENSMUSG00…	ENSMUSG00000025358(Cdk2),ENSMUSG00000066800(Rnasel),ENSMUSG00000006728(Cdk4),ENSMUSG00000037936(Scarb1),ENSMUSG00000031834(Pik3r2),ENSMUSG00000015846(Rxra),ENSMUSG00000037523(Mavs),ENSMUSG00000022105(Rb1),ENSMUSG00000018983(E2f2),ENSMUSG00000028017(Egf),ENSMUSG00000031077(Fadd),ENSMUSG00000028914(Casp9),ENSMUSG00000005102(Eif2ak4),ENSMUSG00000027490(E2f1),ENSMUSG00000070348(Ccnd1),ENSMUSG00000031…	http://www.kegg.jp/kegg-bin/show_pathway?map05160/K11221%09%23FFFFFF,red/K08524%09%23FFFFFF,green/K02649%09%23FFFFFF,purple/K06618%09%23FFFFFF,green/K09447%09%23FFFFFF,red/K06625%09%23FFFFFF,red/K05842%09%23FFFFFF,red/K02206%09%23FFFFFF,green/K02580%09%23FFFFFF,red/K07210%09%23FFFFFF,red/K05415%09%23FFFFFF,red/K04399%09%23FFFFFF,green/K14216%09%23FFFFFF,red/K12473%09%23FFFFFF,red/K03156%09%23FFFF…
mmu04380	Osteoclast differentiation	Organismal Systems	Development	53	11	64	123	1.58238e-11	7.04572e-10	ENSMUSG00000028163(Nfkb1),ENSMUSG00000021936(Mapk8),ENSMUSG00000002983(Relb),ENSMUSG00000040033(Stat2),ENSMUSG00000022092(Ppp3cc),ENSMUSG00000026656(Fcgr2b),ENSMUSG00000036712(Cyld),ENSMUSG00000059089(Fcgr4),ENSMUSG00000053113(Socs3),ENSMUSG00000095788(Sirpb1a),ENSMUSG00000015837(Sqstm1),ENSMUSG00000021025(Nfkbia),ENSMUSG00000028698(Pik3r3),ENSMUSG00000026942(Traf2),ENSMUSG00000035158(Mitf),ENSMU…	ENSMUSG00000052684(Jun),ENSMUSG00000020689(Itgb3),ENSMUSG00000031834(Pik3r2),ENSMUSG00000000440(Pparg),ENSMUSG00000022414(Tab1),ENSMUSG00000029217(Tec),ENSMUSG00000032440(Tgfbr2),ENSMUSG00000007613(Tgfbr1),ENSMUSG00000033016(Nfatc1),ENSMUSG00000027544(Nfatc2),ENSMUSG00000021250(Fos)	http://www.kegg.jp/kegg-bin/show_pathway?map04380/K04441%09%23FFFFFF,red/K03158%09%23FFFFFF,red/K05415%09%23FFFFFF,red/K04368%09%23FFFFFF,red/K14379%09%23FFFFFF,red/K02580%09%23FFFFFF,red/K00922%09%23FFFFFF,red/K05148%09%23FFFFFF,red/K06493%09%23FFFFFF,green/K03173%09%23FFFFFF,red/K04735%09%23FFFFFF,red/K12560%09%23FFFFFF,red/K04693%09%23FFFFFF,red/K11219%09%23FFFFFF,red/K17332%09%23FFFFFF,green/…
mmu05140	Leishmaniasis	Human Diseases	Infectious diseases: Parasitic	37	5	42	67	1.78939e-11	7.04572e-10	ENSMUSG00000026104(Stat1),ENSMUSG00000036594(H2-Aa),ENSMUSG00000024789(Jak2),ENSMUSG00000071715(Ncf4),ENSMUSG00000020826(Nos2),ENSMUSG00000027995(Tlr2),ENSMUSG00000030595(Nfkbib),ENSMUSG00000027009(Itga4),ENSMUSG00000052889(Prkcb),ENSMUSG00000027398(Il1b),ENSMUSG00000027399(Il1a),ENSMUSG00000079547(H2-DMb1),ENSMUSG00000004296(Il12b),ENSMUSG00000030786(Itgam),ENSMUSG00000053137(Mapk11),ENSMUSG0000…	ENSMUSG00000021253(Tgfb3),ENSMUSG00000021250(Fos),ENSMUSG00000000869(Il4),ENSMUSG00000052684(Jun),ENSMUSG00000022414(Tab1)	http://www.kegg.jp/kegg-bin/show_pathway?map05140/K05430%09%23FFFFFF,green/K04403%09%23FFFFFF,green/K04734%09%23FFFFFF,red/K06498%09%23FFFFFF,red/K02581%09%23FFFFFF,red/K19662%09%23FFFFFF,red/K05697%09%23FFFFFF,red/K11987%09%23FFFFFF,red/K03990%09%23FFFFFF,red/K04729%09%23FFFFFF,red/K10159%09%23FFFFFF,red/K21421%09%23FFFFFF,red/K13241%09%23FFFFFF,red/K04519%09%23FFFFFF,red/K04383%09%23FFFFFF,red/…
mmu05200	Pathways in cancer	Human Diseases	Cancers: Overview	120	73	193	528	3.59496e-11	1.25824e-09	ENSMUSG00000027878(Notch2),ENSMUSG00000022967(Ifnar1),ENSMUSG00000020611(Gna13),ENSMUSG00000027276(Jag1),ENSMUSG00000027347(Rasgrp1),ENSMUSG00000015709(Arnt2),ENSMUSG00000024789(Jak2),ENSMUSG00000029064(Gnb1),ENSMUSG00000015839(Nfe2l2),ENSMUSG00000030748(Il4ra),ENSMUSG00000025746(Il6),ENSMUSG00000017776(Crk),ENSMUSG00000045005(Fzd5),ENSMUSG00000028800(Hdac1),ENSMUSG00000020122(Egfr),ENSMUSG000000…	ENSMUSG00000021253(Tgfb3),ENSMUSG00000033318(Gstt2),ENSMUSG00000028017(Egf),ENSMUSG00000002109(Ddb2),ENSMUSG00000031077(Fadd),ENSMUSG00000067199(Frat1),ENSMUSG00000032192(Gnb5),ENSMUSG00000031659(Adcy7),ENSMUSG00000039656(Rxrb),ENSMUSG00000027947(Il6ra),ENSMUSG00000005469(Prkaca),ENSMUSG00000021453(Gadd45g),ENSMUSG00000032498(Mlh1),ENSMUSG00000005580(Adcy9),ENSMUSG00000002083(Bbc3),ENSMUSG0000007…	http://www.kegg.jp/kegg-bin/show_pathway?map05200/K04289%09%23FFFFFF,red/K04545%09%23FFFFFF,green/K04365%09%23FFFFFF,red/K04273%09%23FFFFFF,green/K04440%09%23FFFFFF,red/K07835%09%23FFFFFF,red/K04630%09%23FFFFFF,red/K05070%09%23FFFFFF,red/K16858%09%23FFFFFF,green/K05426%09%23FFFFFF,red/K05433%09%23FFFFFF,red/K04388%09%23FFFFFF,green/K16060%09%23FFFFFF,red/K19662%09%23FFFFFF,red/K06618%09%23FFFFFF,…
mmu05167	Kaposi's sarcoma-associated herpesvirus infection	Human Diseases	Infectious diseases: Viral	71	22	93	209	5.22627e-11	1.64628e-09	ENSMUSG00000024778(Fas),ENSMUSG00000079227(Ccr5),ENSMUSG00000035929(H2-Q4),ENSMUSG00000023067(Cdkn1a),ENSMUSG00000001175(Calm1),ENSMUSG00000056116(H2-T22),ENSMUSG00000029379(Cxcl3),ENSMUSG00000022346(Myc),ENSMUSG00000024927(Rela),ENSMUSG00000024164(C3),ENSMUSG00000053137(Mapk11),ENSMUSG00000057789(Bak1),ENSMUSG00000016206(H2-M3),ENSMUSG00000067212(H2-T23),ENSMUSG00000053835(H2-T24),ENSMUSG0000002…	ENSMUSG00000038607(Gng10),ENSMUSG00000031465(Angpt2),ENSMUSG00000037526(Atg14),ENSMUSG00000021250(Fos),ENSMUSG00000027490(E2f1),ENSMUSG00000070348(Ccnd1),ENSMUSG00000042644(Itpr3),ENSMUSG00000027544(Nfatc2),ENSMUSG00000028914(Casp9),ENSMUSG00000033016(Nfatc1),ENSMUSG00000032192(Gnb5),ENSMUSG00000031077(Fadd),ENSMUSG00000022105(Rb1),ENSMUSG00000018983(E2f2),ENSMUSG00000022667(Cd200r1),ENSMUSG00000…	http://www.kegg.jp/kegg-bin/show_pathway?map05167/K04734%09%23FFFFFF,red/K04377%09%23FFFFFF,red/K05413%09%23FFFFFF,red/K04441%09%23FFFFFF,red/K04545%09%23FFFFFF,green/K03158%09%23FFFFFF,red/K04390%09%23FFFFFF,red/K05427%09%23FFFFFF,red/K08268%09%23FFFFFF,red/K21668%09%23FFFFFF,green/K04180%09%23FFFFFF,red/K14021%09%23FFFFFF,red/K04536%09%23FFFFFF,red/K05401%09%23FFFFFF,red/K05505%09%23FFFFFF,red/…
mmu04062	Chemokine signaling pathway	Organismal Systems	Immune system	65	20	85	186	6.59488e-11	1.88853e-09	ENSMUSG00000006134(Crkl),ENSMUSG00000028874(Fgr),ENSMUSG00000029379(Cxcl3),ENSMUSG00000035373(Ccl7),ENSMUSG00000021948(Prkcd),ENSMUSG00000024960(Plcb3),ENSMUSG00000030595(Nfkbib),ENSMUSG00000037944(Ccr7),ENSMUSG00000024290(Rock1),ENSMUSG00000079227(Ccr5),ENSMUSG00000035352(Ccl12),ENSMUSG00000052889(Prkcb),ENSMUSG00000031779(Ccl22),ENSMUSG00000034855(Cxcl10),ENSMUSG00000031778(Cx3cl1),ENSMUSG00000…	ENSMUSG00000044052(Ccr10),ENSMUSG00000018909(Arrb1),ENSMUSG00000038607(Gng10),ENSMUSG00000045382(Cxcr4),ENSMUSG00000005580(Adcy9),ENSMUSG00000032192(Gnb5),ENSMUSG00000005469(Prkaca),ENSMUSG00000031659(Adcy7),ENSMUSG00000050232(Cxcr3),ENSMUSG00000020654(Adcy3),ENSMUSG00000048756(Foxo3),ENSMUSG00000052336(Cx3cr1),ENSMUSG00000020312(Shc2),ENSMUSG00000031834(Pik3r2),ENSMUSG00000040061(Plcb2),ENSMUSG0…	http://www.kegg.jp/kegg-bin/show_pathway?map04062/K10032%09%23FFFFFF,red/K11221%09%23FFFFFF,red/K08047%09%23FFFFFF,green/K08043%09%23FFFFFF,green/K04538%09%23FFFFFF,red/K05854%09%23FFFFFF,red/K10029%09%23FFFFFF,red/K04189%09%23FFFFFF,green/K04180%09%23FFFFFF,red/K17449%09%23FFFFFF,green/K08891%09%23FFFFFF,red/K04439%09%23FFFFFF,green/K04178%09%23FFFFFF,red/K04734%09%23FFFFFF,red/K10033%09%23FFFFF…
mmu04620	Toll-like receptor signaling pathway	Organismal Systems	Immune system	48	5	53	99	2.18891e-10	5.74588e-09	ENSMUSG00000025746(Il6),ENSMUSG00000024235(Map3k8),ENSMUSG00000031639(Tlr3),ENSMUSG00000022967(Ifnar1),ENSMUSG00000000982(Ccl3),ENSMUSG00000025779(Ly96),ENSMUSG00000026104(Stat1),ENSMUSG00000026029(Casp8),ENSMUSG00000048806(Ifnb1),ENSMUSG00000029417(Cxcl9),ENSMUSG00000004936(Map2k1),ENSMUSG00000015755(Tab2),ENSMUSG00000053137(Mapk11),ENSMUSG00000024927(Rela),ENSMUSG00000044827(Tlr1),ENSMUSG000000…	ENSMUSG00000031077(Fadd),ENSMUSG00000021250(Fos),ENSMUSG00000052684(Jun),ENSMUSG00000031834(Pik3r2),ENSMUSG00000022414(Tab1)	http://www.kegg.jp/kegg-bin/show_pathway?map04620/K04368%09%23FFFFFF,red/K10169%09%23FFFFFF,red/K04404%09%23FFFFFF,red/K05131%09%23FFFFFF,red/K07211%09%23FFFFFF,red/K04415%09%23FFFFFF,red/K04403%09%23FFFFFF,green/K04735%09%23FFFFFF,red/K04734%09%23FFFFFF,red/K05842%09%23FFFFFF,red/K02580%09%23FFFFFF,red/K04379%09%23FFFFFF,green/K11220%09%23FFFFFF,red/K04440%09%23FFFFFF,red/K05398%09%23FFFFFF,red/…
mmu04064	NF-kappa B signaling pathway	Environmental Information Processing	Signal transduction	42	6	48	92	4.75356e-09	1.0747e-07	ENSMUSG00000018930(Ccl4),ENSMUSG00000026942(Traf2),ENSMUSG00000017652(Cd40),ENSMUSG00000021025(Nfkbia),ENSMUSG00000047123(Ticam1),ENSMUSG00000032508(Myd88),ENSMUSG00000027962(Vcam1),ENSMUSG00000019850(Tnfaip3),ENSMUSG00000024399(Ltb),ENSMUSG00000040296(Ddx58),ENSMUSG00000015755(Tab2),ENSMUSG00000024927(Rela),ENSMUSG00000021457(Syk),ENSMUSG00000026321(Tnfrsf11a),ENSMUSG00000027398(Il1b),ENSMUSG000…	ENSMUSG00000022414(Tab1),ENSMUSG00000016933(Plcg1),ENSMUSG00000013483(Card14),ENSMUSG00000036526(Card11),ENSMUSG00000026117(Zap70),ENSMUSG00000025507(Pidd1)	http://www.kegg.jp/kegg-bin/show_pathway?map04064/K05855%09%23FFFFFF,red/K19662%09%23FFFFFF,red/K07368%09%23FFFFFF,red/K07210%09%23FFFFFF,red/K01116%09%23FFFFFF,green/K03157%09%23FFFFFF,red/K03156%09%23FFFFFF,red/K05403%09%23FFFFFF,red/K03173%09%23FFFFFF,red/K07360%09%23FFFFFF,green/K02162%09%23FFFFFF,red/K03097%09%23FFFFFF,red/K04391%09%23FFFFFF,red/K09253%09%23FFFFFF,red/K12646%09%23FFFFFF,red/…
mmu05162	Measles	Human Diseases	Infectious diseases: Viral	51	12	63	134	4.77645e-09	1.0747e-07	ENSMUSG00000026104(Stat1),ENSMUSG00000039304(Tnfsf10),ENSMUSG00000004296(Il12b),ENSMUSG00000027399(Il1a),ENSMUSG00000030595(Nfkbib),ENSMUSG00000027995(Tlr2),ENSMUSG00000015316(Slamf1),ENSMUSG00000040033(Stat2),ENSMUSG00000031304(Il2rg),ENSMUSG00000031207(Msn),ENSMUSG00000052776(Oas1a),ENSMUSG00000032690(Oas2),ENSMUSG00000028163(Nfkb1),ENSMUSG00000020115(Tbk1),ENSMUSG00000004043(Stat5a),ENSMUSG000…	ENSMUSG00000037523(Mavs),ENSMUSG00000070348(Ccnd1),ENSMUSG00000025358(Cdk2),ENSMUSG00000000869(Il4),ENSMUSG00000031834(Pik3r2),ENSMUSG00000059970(Hspa2),ENSMUSG00000002083(Bbc3),ENSMUSG00000005102(Eif2ak4),ENSMUSG00000031668(Eif2ak3),ENSMUSG00000026012(Cd28),ENSMUSG00000006728(Cdk4),ENSMUSG00000016493(Cd46)	http://www.kegg.jp/kegg-bin/show_pathway?map05162/K02089%09%23FFFFFF,green/K04721%09%23FFFFFF,red/K10151%09%23FFFFFF,red/K03283%09%23FFFFFF,purple/K05430%09%23FFFFFF,green/K02206%09%23FFFFFF,green/K10132%09%23FFFFFF,green/K16196%09%23FFFFFF,green/K06470%09%23FFFFFF,green/K05404%09%23FFFFFF,red/K11859%09%23FFFFFF,red/K02580%09%23FFFFFF,red/K05070%09%23FFFFFF,red/K04693%09%23FFFFFF,red/K12646%09%23…
mmu05321	Inflammatory bowel disease (IBD)	Human Diseases	Immune diseases	29	6	35	59	7.12919e-09	1.49713e-07	ENSMUSG00000055435(Maf),ENSMUSG00000026104(Stat1),ENSMUSG00000062939(Stat4),ENSMUSG00000027995(Tlr2),ENSMUSG00000079547(H2-DMb1),ENSMUSG00000004296(Il12b),ENSMUSG00000049093(Il23r),ENSMUSG00000027399(Il1a),ENSMUSG00000055994(Nod2),ENSMUSG00000025383(Il23a),ENSMUSG00000060586(H2-Eb1),ENSMUSG00000028163(Nfkb1),ENSMUSG00000031304(Il2rg),ENSMUSG00000016529(Il10),ENSMUSG00000024401(Tnf),ENSMUSG0000003…	ENSMUSG00000039521(Foxp3),ENSMUSG00000000869(Il4),ENSMUSG00000052684(Jun),ENSMUSG00000033016(Nfatc1),ENSMUSG00000021253(Tgfb3),ENSMUSG00000032238(Rora)	http://www.kegg.jp/kegg-bin/show_pathway?map05321/K11220%09%23FFFFFF,red/K05430%09%23FFFFFF,green/K13377%09%23FFFFFF,green/K05482%09%23FFFFFF,red/K10159%09%23FFFFFF,red/K05443%09%23FFFFFF,red/K05071%09%23FFFFFF,red/K05063%09%23FFFFFF,red/K05174%09%23FFFFFF,red/K05405%09%23FFFFFF,red/K05070%09%23FFFFFF,red/K04383%09%23FFFFFF,red/K08532%09%23FFFFFF,green/K04448%09%23FFFFFF,green/K10165%09%23FFFFFF,…
mmu04659	Th17 cell differentiation	Organismal Systems	Immune system	35	16	51	102	1.05201e-08	2.07114e-07	ENSMUSG00000032175(Tyk2),ENSMUSG00000005763(Cd247),ENSMUSG00000036594(H2-Aa),ENSMUSG00000025746(Il6),ENSMUSG00000030748(Il4ra),ENSMUSG00000024789(Jak2),ENSMUSG00000026104(Stat1),ENSMUSG00000019256(Ahr),ENSMUSG00000049093(Il23r),ENSMUSG00000027398(Il1b),ENSMUSG00000079547(H2-DMb1),ENSMUSG00000000409(Lck),ENSMUSG00000053137(Mapk11),ENSMUSG00000024927(Rela),ENSMUSG00000030595(Nfkbib),ENSMUSG00000022…	ENSMUSG00000032440(Tgfbr2),ENSMUSG00000026117(Zap70),ENSMUSG00000007613(Tgfbr1),ENSMUSG00000033016(Nfatc1),ENSMUSG00000039656(Rxrb),ENSMUSG00000027947(Il6ra),ENSMUSG00000027544(Nfatc2),ENSMUSG00000021250(Fos),ENSMUSG00000039521(Foxp3),ENSMUSG00000021356(Irf4),ENSMUSG00000052684(Jun),ENSMUSG00000016933(Plcg1),ENSMUSG00000000869(Il4),ENSMUSG00000021756(Il6st),ENSMUSG00000032238(Rora),ENSMUSG0000001…	http://www.kegg.jp/kegg-bin/show_pathway?map04659/K08524%09%23FFFFFF,green/K08525%09%23FFFFFF,green/K11220%09%23FFFFFF,red/K04079%09%23FFFFFF,red/K09445%09%23FFFFFF,green/K05405%09%23FFFFFF,red/K04440%09%23FFFFFF,red/K05872%09%23FFFFFF,red/K04674%09%23FFFFFF,green/K04379%09%23FFFFFF,green/K04348%09%23FFFFFF,red/K05055%09%23FFFFFF,green/K01116%09%23FFFFFF,green/K04388%09%23FFFFFF,green/K05430%09%2…
mmu05145	Toxoplasmosis	Human Diseases	Infectious diseases: Parasitic	47	6	53	109	1.86752e-08	3.38267e-07	ENSMUSG00000057367(Birc2),ENSMUSG00000024789(Jak2),ENSMUSG00000036594(H2-Aa),ENSMUSG00000020573(Pik3cg),ENSMUSG00000090877(Hspa1b),ENSMUSG00000032175(Tyk2),ENSMUSG00000020901(Pik3r5),ENSMUSG00000026029(Casp8),ENSMUSG00000025779(Ly96),ENSMUSG00000026104(Stat1),ENSMUSG00000038037(Socs1),ENSMUSG00000015755(Tab2),ENSMUSG00000053137(Mapk11),ENSMUSG00000024927(Rela),ENSMUSG00000079547(H2-DMb1),ENSMUSG0…	ENSMUSG00000027111(Itga6),ENSMUSG00000021253(Tgfb3),ENSMUSG00000028914(Casp9),ENSMUSG00000059970(Hspa2),ENSMUSG00000022414(Tab1),ENSMUSG00000024421(Lama3)	http://www.kegg.jp/kegg-bin/show_pathway?map05145/K07210%09%23FFFFFF,red/K04692%09%23FFFFFF,red/K13241%09%23FFFFFF,red/K14139%09%23FFFFFF,red/K03158%09%23FFFFFF,red/K13377%09%23FFFFFF,green/K05400%09%23FFFFFF,red/K12473%09%23FFFFFF,red/K04441%09%23FFFFFF,red/K04403%09%23FFFFFF,green/K06485%09%23FFFFFF,green/K04399%09%23FFFFFF,green/K08060%09%23FFFFFF,red/K02580%09%23FFFFFF,red/K03160%09%23FFFFFF,…
mmu05202	Transcriptional misregulation in cancer	Human Diseases	Cancers: Overview	49	26	75	174	2.01771e-08	3.38267e-07	ENSMUSG00000028341(Nr4a3),ENSMUSG00000025746(Il6),ENSMUSG00000089929(Bcl2a1b),ENSMUSG00000020719(Ddx5),ENSMUSG00000015709(Arnt2),ENSMUSG00000015437(Gzmb),ENSMUSG00000028800(Hdac1),ENSMUSG00000055435(Maf),ENSMUSG00000030199(Etv6),ENSMUSG00000022901(Cd86),ENSMUSG00000024927(Rela),ENSMUSG00000022508(Bcl6),ENSMUSG00000002111(Spi1),ENSMUSG00000057789(Bak1),ENSMUSG00000029648(Flt1),ENSMUSG00000018916(C…	ENSMUSG00000032440(Tgfbr2),ENSMUSG00000034041(Lyl1),ENSMUSG00000039656(Rxrb),ENSMUSG00000031613(Hpgd),ENSMUSG00000005583(Mef2c),ENSMUSG00000021453(Gadd45g),ENSMUSG00000002109(Ddb2),ENSMUSG00000032698(Lmo2),ENSMUSG00000027315(Spint1),ENSMUSG00000039153(Runx2),ENSMUSG00000025856(Pdgfa),ENSMUSG00000016087(Fli1),ENSMUSG00000004151(Etv1),ENSMUSG00000034957(Cebpa),ENSMUSG00000020167(Tcf3),ENSMUSG000000…	http://www.kegg.jp/kegg-bin/show_pathway?map05202/K05413%09%23FFFFFF,red/K09633%09%23FFFFFF,red/K11459%09%23FFFFFF,red/K06461%09%23FFFFFF,red/K06498%09%23FFFFFF,red/K15619%09%23FFFFFF,green/K08530%09%23FFFFFF,green/K04454%09%23FFFFFF,green/K08559%09%23FFFFFF,red/K05405%09%23FFFFFF,red/K10151%09%23FFFFFF,red/K03211%09%23FFFFFF,red/K03172%09%23FFFFFF,red/K15617%09%23FFFFFF,green/K04391%09%23FFFFFF,…
mmu05161	Hepatitis B	Human Diseases	Infectious diseases: Viral	45	20	65	144	2.04034e-08	3.38267e-07	ENSMUSG00000008892(Vdac3),ENSMUSG00000040296(Ddx58),ENSMUSG00000024927(Rela),ENSMUSG00000024778(Fas),ENSMUSG00000025746(Il6),ENSMUSG00000022967(Ifnar1),ENSMUSG00000053007(Creb5),ENSMUSG00000048806(Ifnb1),ENSMUSG00000019979(Apaf1),ENSMUSG00000025498(Irf7),ENSMUSG00000022285(Ywhaz),ENSMUSG00000004040(Stat3),ENSMUSG00000021025(Nfkbia),ENSMUSG00000047123(Ticam1),ENSMUSG00000025887(Casp12),ENSMUSG0000…	ENSMUSG00000027490(E2f1),ENSMUSG00000021253(Tgfb3),ENSMUSG00000033016(Nfatc1),ENSMUSG00000021754(Map3k1),ENSMUSG00000031077(Fadd),ENSMUSG00000002109(Ddb2),ENSMUSG00000006728(Cdk4),ENSMUSG00000070348(Ccnd1),ENSMUSG00000027544(Nfatc2),ENSMUSG00000021250(Fos),ENSMUSG00000017716(Birc5),ENSMUSG00000018983(E2f2),ENSMUSG00000037523(Mavs),ENSMUSG00000022105(Rb1),ENSMUSG00000028914(Casp9),ENSMUSG000000076…	http://www.kegg.jp/kegg-bin/show_pathway?map05161/K05842%09%23FFFFFF,red/K15041%09%23FFFFFF,red/K11221%09%23FFFFFF,red/K04399%09%23FFFFFF,green/K19662%09%23FFFFFF,red/K13377%09%23FFFFFF,green/K04448%09%23FFFFFF,green/K05415%09%23FFFFFF,red/K06625%09%23FFFFFF,red/K04446%09%23FFFFFF,green/K08738%09%23FFFFFF,red/K05401%09%23FFFFFF,red/K09447%09%23FFFFFF,red/K16197%09%23FFFFFF,red/K04674%09%23FFFFFF,…
mmu05142	Chagas disease (American trypanosomiasis)	Human Diseases	Infectious diseases: Parasitic	42	8	50	101	2.22497e-08	3.50433e-07	ENSMUSG00000004296(Il12b),ENSMUSG00000027995(Tlr2),ENSMUSG00000024960(Plcb3),ENSMUSG00000022052(Ppp2r2a),ENSMUSG00000026029(Casp8),ENSMUSG00000024639(Gnaq),ENSMUSG00000000982(Ccl3),ENSMUSG00000028698(Pik3r3),ENSMUSG00000030341(Tnfrsf1a),ENSMUSG00000024401(Tnf),ENSMUSG00000026031(Cflar),ENSMUSG00000016529(Il10),ENSMUSG00000033352(Map2k4),ENSMUSG00000004221(Ikbkg),ENSMUSG00000028163(Nfkb1),ENSMUSG0…	ENSMUSG00000021250(Fos),ENSMUSG00000032440(Tgfbr2),ENSMUSG00000007613(Tgfbr1),ENSMUSG00000040061(Plcb2),ENSMUSG00000031834(Pik3r2),ENSMUSG00000052684(Jun),ENSMUSG00000021253(Tgfb3),ENSMUSG00000031077(Fadd)	http://www.kegg.jp/kegg-bin/show_pathway?map05142/K04382%09%23FFFFFF,red/K04674%09%23FFFFFF,green/K00922%09%23FFFFFF,red/K05405%09%23FFFFFF,red/K06453%09%23FFFFFF,red/K02649%09%23FFFFFF,purple/K04634%09%23FFFFFF,red/K04430%09%23FFFFFF,red/K02373%09%23FFFFFF,green/K03986%09%23FFFFFF,red/K04729%09%23FFFFFF,red/K04519%09%23FFFFFF,red/K13241%09%23FFFFFF,red/K03990%09%23FFFFFF,red/K04354%09%23FFFFFF,r…
mmu04625	C-type lectin receptor signaling pathway	Organismal Systems	Immune system	48	5	53	111	4.06872e-08	6.10309e-07	ENSMUSG00000032487(Ptgs2),ENSMUSG00000022092(Ppp3cc),ENSMUSG00000002983(Relb),ENSMUSG00000040033(Stat2),ENSMUSG00000030144(Clec4d),ENSMUSG00000021936(Mapk8),ENSMUSG00000028163(Nfkb1),ENSMUSG00000018899(Irf1),ENSMUSG00000042349(Ikbke),ENSMUSG00000020184(Mdm2),ENSMUSG00000027776(Il12a),ENSMUSG00000025383(Il23a),ENSMUSG00000036712(Cyld),ENSMUSG00000024401(Tnf),ENSMUSG00000032691(Nlrp3),ENSMUSG000000…	ENSMUSG00000052684(Jun),ENSMUSG00000031834(Pik3r2),ENSMUSG00000033016(Nfatc1),ENSMUSG00000042644(Itpr3),ENSMUSG00000027544(Nfatc2)	http://www.kegg.jp/kegg-bin/show_pathway?map04625/K04519%09%23FFFFFF,red/K17332%09%23FFFFFF,green/K10058%09%23FFFFFF,red/K05405%09%23FFFFFF,red/K06643%09%23FFFFFF,red/K10059%09%23FFFFFF,red/K02580%09%23FFFFFF,red/K04443%09%23FFFFFF,red/K05426%09%23FFFFFF,red/K05443%09%23FFFFFF,red/K12800%09%23FFFFFF,red/K04693%09%23FFFFFF,red/K11987%09%23FFFFFF,red/K04348%09%23FFFFFF,red/K07293%09%23FFFFFF,red/K0…
mmu04657	IL-17 signaling pathway	Organismal Systems	Immune system	41	4	45	90	7.60665e-08	1.07984e-06	ENSMUSG00000034855(Cxcl10),ENSMUSG00000038067(Csf3),ENSMUSG00000018916(Csf2),ENSMUSG00000035373(Ccl7),ENSMUSG00000024912(Fosl1),ENSMUSG00000022867(Usp25),ENSMUSG00000026029(Casp8),ENSMUSG00000024401(Tnf),ENSMUSG00000017737(Mmp9),ENSMUSG00000031780(Ccl17),ENSMUSG00000042688(Mapk6),ENSMUSG00000004221(Ikbkg),ENSMUSG00000021936(Mapk8),ENSMUSG00000028163(Nfkb1),ENSMUSG00000021270(Hsp90aa1),ENSMUSG0000…	ENSMUSG00000021250(Fos),ENSMUSG00000052684(Jun),ENSMUSG00000000869(Il4),ENSMUSG00000031077(Fadd)	http://www.kegg.jp/kegg-bin/show_pathway?map04657/K01403%09%23FFFFFF,red/K05505%09%23FFFFFF,red/K01394%09%23FFFFFF,red/K12671%09%23FFFFFF,red/K05509%09%23FFFFFF,red/K21127%09%23FFFFFF,red/K05427%09%23FFFFFF,red/K05430%09%23FFFFFF,green/K04398%09%23FFFFFF,red/K05423%09%23FFFFFF,red/K05164%09%23FFFFFF,red/K11849%09%23FFFFFF,red/K14624%09%23FFFFFF,red/K21128%09%23FFFFFF,red/K05405%09%23FFFFFF,red/K0…
mmu05134	Legionellosis	Human Diseases	Infectious diseases: Bacterial	29	4	33	58	7.88454e-08	1.07984e-06	ENSMUSG00000032508(Myd88),ENSMUSG00000063694(Cycs),ENSMUSG00000019979(Apaf1),ENSMUSG00000029380(Cxcl1),ENSMUSG00000021025(Nfkbia),ENSMUSG00000039217(Il18),ENSMUSG00000027776(Il12a),ENSMUSG00000029379(Cxcl3),ENSMUSG00000048076(Arf1),ENSMUSG00000024164(C3),ENSMUSG00000024927(Rela),ENSMUSG00000030786(Itgam),ENSMUSG00000027398(Il1b),ENSMUSG00000025746(Il6),ENSMUSG00000078566(Bnip3),ENSMUSG00000090877…	ENSMUSG00000021640(Naip1),ENSMUSG00000059970(Hspa2),ENSMUSG00000028914(Casp9),ENSMUSG00000016349(Eef1a2)	http://www.kegg.jp/kegg-bin/show_pathway?map05134/K01370%09%23FFFFFF,red/K03156%09%23FFFFFF,red/K04519%09%23FFFFFF,red/K03283%09%23FFFFFF,purple/K07937%09%23FFFFFF,red/K04735%09%23FFFFFF,red/K12807%09%23FFFFFF,purple/K04729%09%23FFFFFF,red/K06461%09%23FFFFFF,red/K04734%09%23FFFFFF,red/K05405%09%23FFFFFF,red/K10159%09%23FFFFFF,red/K04398%09%23FFFFFF,red/K04397%09%23FFFFFF,red/K05406%09%23FFFFFF,re…
mmu04658	Th1 and Th2 cell differentiation	Organismal Systems	Immune system	36	7	43	87	2.23861e-07	2.93817e-06	ENSMUSG00000028163(Nfkb1),ENSMUSG00000021936(Mapk8),ENSMUSG00000073421(H2-Ab1),ENSMUSG00000000791(Il12rb1),ENSMUSG00000060586(H2-Eb1),ENSMUSG00000031304(Il2rg),ENSMUSG00000022092(Ppp3cc),ENSMUSG00000037649(H2-DMa),ENSMUSG00000031925(Maml2),ENSMUSG00000027776(Il12a),ENSMUSG00000004043(Stat5a),ENSMUSG00000021025(Nfkbia),ENSMUSG00000041538(H2-Ob),ENSMUSG00000039191(Rbpj),ENSMUSG00000024334(H2-Oa),EN…	ENSMUSG00000052684(Jun),ENSMUSG00000016933(Plcg1),ENSMUSG00000000869(Il4),ENSMUSG00000026117(Zap70),ENSMUSG00000033016(Nfatc1),ENSMUSG00000027544(Nfatc2),ENSMUSG00000021250(Fos)	http://www.kegg.jp/kegg-bin/show_pathway?map04658/K04447%09%23FFFFFF,red/K05070%09%23FFFFFF,red/K05071%09%23FFFFFF,red/K04348%09%23FFFFFF,red/K06453%09%23FFFFFF,red/K05063%09%23FFFFFF,red/K04735%09%23FFFFFF,red/K05872%09%23FFFFFF,red/K20994%09%23FFFFFF,red/K06752%09%23FFFFFF,red/K09035%09%23FFFFFF,red/K07360%09%23FFFFFF,green/K11222%09%23FFFFFF,red/K05856%09%23FFFFFF,red/K05425%09%23FFFFFF,red/K0…
mmu05152	Tuberculosis	Human Diseases	Infectious diseases: Bacterial	63	10	73	178	3.44326e-07	4.33851e-06	ENSMUSG00000030341(Tnfrsf1a),ENSMUSG00000027646(Src),ENSMUSG00000024401(Tnf),ENSMUSG00000053819(Camk2d),ENSMUSG00000038357(Camp),ENSMUSG00000051439(Cd14),ENSMUSG00000016529(Il10),ENSMUSG00000060586(H2-Eb1),ENSMUSG00000060477(Irak2),ENSMUSG00000028163(Nfkb1),ENSMUSG00000021936(Mapk8),ENSMUSG00000030707(Coro1a),ENSMUSG00000025383(Il23a),ENSMUSG00000032688(Malt1),ENSMUSG00000079547(H2-DMb1),ENSMUSG0…	ENSMUSG00000021820(Camk2g),ENSMUSG00000022479(Vdr),ENSMUSG00000019302(Atp6v0a1),ENSMUSG00000028914(Casp9),ENSMUSG00000028238(Atp6v0d2),ENSMUSG00000036120(Rfxank),ENSMUSG00000056216(Cebpg),ENSMUSG00000036615(Rfxap),ENSMUSG00000021253(Tgfb3),ENSMUSG00000031077(Fadd)	http://www.kegg.jp/kegg-bin/show_pathway?map05152/K06498%09%23FFFFFF,red/K05405%09%23FFFFFF,red/K05426%09%23FFFFFF,red/K06560%09%23FFFFFF,red/K02084%09%23FFFFFF,red/K07983%09%23FFFFFF,red/K04729%09%23FFFFFF,red/K04519%09%23FFFFFF,red/K13882%09%23FFFFFF,red/K08062%09%23FFFFFF,green/K03990%09%23FFFFFF,red/K06505%09%23FFFFFF,red/K04398%09%23FFFFFF,red/K13241%09%23FFFFFF,red/K10159%09%23FFFFFF,red/K0…
mmu04060	Cytokine-cytokine receptor interaction	Environmental Information Processing	Signaling molecules and interaction	87	19	106	286	4.40407e-07	5.3357e-06	ENSMUSG00000022967(Ifnar1),ENSMUSG00000044244(Il20rb),ENSMUSG00000041324(Inhba),ENSMUSG00000000532(Acvr1b),ENSMUSG00000030748(Il4ra),ENSMUSG00000025746(Il6),ENSMUSG00000026068(Il18rap),ENSMUSG00000052155(Acvr2a),ENSMUSG00000024402(Lta),ENSMUSG00000035678(Tnfsf9),ENSMUSG00000023078(Cxcl13),ENSMUSG00000029417(Cxcl9),ENSMUSG00000050395(Tnfsf15),ENSMUSG00000048806(Ifnb1),ENSMUSG00000000982(Ccl3),ENSM…	ENSMUSG00000021253(Tgfb3),ENSMUSG00000052336(Cx3cr1),ENSMUSG00000032440(Tgfbr2),ENSMUSG00000007613(Tgfbr1),ENSMUSG00000027947(Il6ra),ENSMUSG00000050232(Cxcr3),ENSMUSG00000006235(Epor),ENSMUSG00000045382(Cxcr4),ENSMUSG00000097328(Tnfsf12),ENSMUSG00000023905(Tnfrsf12a),ENSMUSG00000044052(Ccr10),ENSMUSG00000023915(Tnfrsf21),ENSMUSG00000000869(Il4),ENSMUSG00000021508(Cxcl14),ENSMUSG00000001741(Il16),…	http://www.kegg.jp/kegg-bin/show_pathway?map04060/K04189%09%23FFFFFF,green/K05505%09%23FFFFFF,red/K14625%09%23FFFFFF,red/K03158%09%23FFFFFF,red/K22671%09%23FFFFFF,red/K05074%09%23FFFFFF,red/K05427%09%23FFFFFF,red/K05406%09%23FFFFFF,red/K04667%09%23FFFFFF,red/K05421%09%23FFFFFF,red/K05149%09%23FFFFFF,green/K03160%09%23FFFFFF,red/K22628%09%23FFFFFF,green/K05436%09%23FFFFFF,red/K04178%09%23FFFFFF,re…
mmu05206	MicroRNAs in cancer	Human Diseases	Cancers: Overview	39	21	60	140	6.43745e-07	7.51036e-06	ENSMUSG00000027878(Notch2),ENSMUSG00000024238(Zeb1),ENSMUSG00000005087(Cd44),ENSMUSG00000038612(Mcl1),ENSMUSG00000017776(Crk),ENSMUSG00000004936(Map2k1),ENSMUSG00000038037(Socs1),ENSMUSG00000021546(Hnrnpk),ENSMUSG00000020122(Egfr),ENSMUSG00000040152(Thbs1),ENSMUSG00000026923(Notch1),ENSMUSG00000052889(Prkcb),ENSMUSG00000041313(Slc7a1),ENSMUSG00000057789(Bak1),ENSMUSG00000022346(Myc),ENSMUSG000000…	ENSMUSG00000018983(E2f2),ENSMUSG00000024975(Pdcd4),ENSMUSG00000040093(Bmf),ENSMUSG00000027330(Cdc25b),ENSMUSG00000031995(St14),ENSMUSG00000070348(Ccnd1),ENSMUSG00000027490(E2f1),ENSMUSG00000025856(Pdgfa),ENSMUSG00000017146(Brca1),ENSMUSG00000035109(Shc4),ENSMUSG00000016933(Plcg1),ENSMUSG00000004099(Dnmt1),ENSMUSG00000038894(Irs2),ENSMUSG00000056758(Hmga2),ENSMUSG00000055980(Irs1),ENSMUSG000000206…	http://www.kegg.jp/kegg-bin/show_pathway?map05206/K01403%09%23FFFFFF,red/K04361%09%23FFFFFF,red/K09283%09%23FFFFFF,green/K04503%09%23FFFFFF,green/K06620%09%23FFFFFF,red/K12886%09%23FFFFFF,red/K04359%09%23FFFFFF,green/K02539%09%23FFFFFF,red/K14021%09%23FFFFFF,red/K04381%09%23FFFFFF,green/K04368%09%23FFFFFF,red/K02091%09%23FFFFFF,red/K09299%09%23FFFFFF,red/K00510%09%23FFFFFF,red/K06619%09%23FFFFFF,…
mmu05133	Pertussis	Human Diseases	Infectious diseases: Bacterial	36	2	38	76	7.69654e-07	8.48385e-06	ENSMUSG00000032691(Nlrp3),ENSMUSG00000032508(Myd88),ENSMUSG00000000001(Gnai3),ENSMUSG00000047123(Ticam1),ENSMUSG00000029371(Cxcl5),ENSMUSG00000018899(Irf1),ENSMUSG00000027776(Il12a),ENSMUSG00000053137(Mapk11),ENSMUSG00000024927(Rela),ENSMUSG00000024164(C3),ENSMUSG00000027398(Il1b),ENSMUSG00000030786(Itgam),ENSMUSG00000036905(C1qb),ENSMUSG00000000555(Itga5),ENSMUSG00000020826(Nos2),ENSMUSG00000036…	ENSMUSG00000052684(Jun),ENSMUSG00000021250(Fos)	http://www.kegg.jp/kegg-bin/show_pathway?map05133/K04383%09%23FFFFFF,red/K03990%09%23FFFFFF,red/K06461%09%23FFFFFF,red/K05506%09%23FFFFFF,red/K05425%09%23FFFFFF,red/K13241%09%23FFFFFF,red/K05409%09%23FFFFFF,red/K03989%09%23FFFFFF,red/K01370%09%23FFFFFF,red/K04630%09%23FFFFFF,red/K04441%09%23FFFFFF,red/K04519%09%23FFFFFF,red/K05426%09%23FFFFFF,red/K03156%09%23FFFFFF,red/K05400%09%23FFFFFF,red/K013…
mmu05166	HTLV-I infection	Human Diseases	Infectious diseases: Viral	62	28	90	236	7.81053e-07	8.48385e-06	ENSMUSG00000024912(Fosl1),ENSMUSG00000092243(Gm7030),ENSMUSG00000025746(Il6),ENSMUSG00000020248(Nfyb),ENSMUSG00000025225(Nfkb2),ENSMUSG00000024402(Lta),ENSMUSG00000022895(Ets2),ENSMUSG00000036594(H2-Aa),ENSMUSG00000053007(Creb5),ENSMUSG00000004936(Map2k1),ENSMUSG00000067212(H2-T23),ENSMUSG00000016206(H2-M3),ENSMUSG00000053835(H2-T24),ENSMUSG00000002111(Spi1),ENSMUSG00000024927(Rela),ENSMUSG000000…	ENSMUSG00000032440(Tgfbr2),ENSMUSG00000029554(Mad1l1),ENSMUSG00000018983(E2f2),ENSMUSG00000022105(Rb1),ENSMUSG00000020654(Adcy3),ENSMUSG00000021253(Tgfb3),ENSMUSG00000021754(Map3k1),ENSMUSG00000005469(Prkaca),ENSMUSG00000033016(Nfatc1),ENSMUSG00000031659(Adcy7),ENSMUSG00000007613(Tgfbr1),ENSMUSG00000027490(E2f1),ENSMUSG00000070348(Ccnd1),ENSMUSG00000005580(Adcy9),ENSMUSG00000027544(Nfatc2),ENSMUS…	http://www.kegg.jp/kegg-bin/show_pathway?map05166/K15308%09%23FFFFFF,red/K05468%09%23FFFFFF,red/K04448%09%23FFFFFF,green/K04469%09%23FFFFFF,red/K07210%09%23FFFFFF,red/K09389%09%23FFFFFF,green/K06637%09%23FFFFFF,green/K06620%09%23FFFFFF,red/K05070%09%23FFFFFF,red/K03156%09%23FFFFFF,red/K08055%09%23FFFFFF,red/K06635%09%23FFFFFF,red/K05068%09%23FFFFFF,red/K17332%09%23FFFFFF,green/K06625%09%23FFFFFF,…
mmu05323	Rheumatoid arthritis	Human Diseases	Immune diseases	33	7	40	82	9.06442e-07	9.51765e-06	ENSMUSG00000075122(Cd80),ENSMUSG00000029371(Cxcl5),ENSMUSG00000037405(Icam1),ENSMUSG00000024334(H2-Oa),ENSMUSG00000024401(Tnf),ENSMUSG00000026166(Ccl20),ENSMUSG00000043613(Mmp3),ENSMUSG00000041538(H2-Ob),ENSMUSG00000039217(Il18),ENSMUSG00000035385(Ccl2),ENSMUSG00000037649(H2-DMa),ENSMUSG00000025383(Il23a),ENSMUSG00000030830(Itgal),ENSMUSG00000035042(Ccl5),ENSMUSG00000019210(Atp6v1e1),ENSMUSG00000…	ENSMUSG00000089669(Tnfsf13),ENSMUSG00000026012(Cd28),ENSMUSG00000052684(Jun),ENSMUSG00000021250(Fos),ENSMUSG00000028238(Atp6v0d2),ENSMUSG00000019302(Atp6v0a1),ENSMUSG00000021253(Tgfb3)	http://www.kegg.jp/kegg-bin/show_pathway?map05323/K14624%09%23FFFFFF,red/K04379%09%23FFFFFF,green/K05475%09%23FFFFFF,green/K05482%09%23FFFFFF,red/K05718%09%23FFFFFF,red/K14379%09%23FFFFFF,red/K04519%09%23FFFFFF,red/K04383%09%23FFFFFF,red/K03157%09%23FFFFFF,red/K04448%09%23FFFFFF,green/K05096%09%23FFFFFF,red/K03156%09%23FFFFFF,red/K02154%09%23FFFFFF,green/K05412%09%23FFFFFF,red/K05433%09%23FFFFFF,…
mmu05220	Chronic myeloid leukemia	Human Diseases	Cancers: Specific types	22	15	37	75	1.62906e-06	1.63452e-05	ENSMUSG00000028800(Hdac1),ENSMUSG00000017776(Crk),ENSMUSG00000024927(Rela),ENSMUSG00000041417(Pik3r1),ENSMUSG00000015312(Gadd45b),ENSMUSG00000039936(Pik3cd),ENSMUSG00000021025(Nfkbia),ENSMUSG00000004936(Map2k1),ENSMUSG00000023067(Cdkn1a),ENSMUSG00000006134(Crkl),ENSMUSG00000022346(Myc),ENSMUSG00000057789(Bak1),ENSMUSG00000002413(Braf),ENSMUSG00000024241(Sos1),ENSMUSG00000020184(Mdm2),ENSMUSG00000…	ENSMUSG00000021453(Gadd45g),ENSMUSG00000002109(Ddb2),ENSMUSG00000020312(Shc2),ENSMUSG00000021253(Tgfb3),ENSMUSG00000027490(E2f1),ENSMUSG00000006728(Cdk4),ENSMUSG00000007613(Tgfbr1),ENSMUSG00000032440(Tgfbr2),ENSMUSG00000022105(Rb1),ENSMUSG00000018983(E2f2),ENSMUSG00000070348(Ccnd1),ENSMUSG00000035109(Shc4),ENSMUSG00000026842(Abl1),ENSMUSG00000021668(Polk),ENSMUSG00000031834(Pik3r2)	http://www.kegg.jp/kegg-bin/show_pathway?map05220/K10140%09%23FFFFFF,green/K06620%09%23FFFFFF,red/K14021%09%23FFFFFF,red/K04388%09%23FFFFFF,green/K04674%09%23FFFFFF,green/K07293%09%23FFFFFF,red/K02089%09%23FFFFFF,green/K04402%09%23FFFFFF,purple/K06067%09%23FFFFFF,red/K17449%09%23FFFFFF,green/K00922%09%23FFFFFF,red/K04438%09%23FFFFFF,red/K06618%09%23FFFFFF,green/K04377%09%23FFFFFF,red/K06619%09%23…
mmu04010	MAPK signaling pathway	Environmental Information Processing	Signal transduction	70	36	106	293	1.66046e-06	1.63452e-05	ENSMUSG00000025278(Flnb),ENSMUSG00000004085(Map3k20),ENSMUSG00000021936(Mapk8),ENSMUSG00000028163(Nfkb1),ENSMUSG00000022514(Il1rap),ENSMUSG00000022092(Ppp3cc),ENSMUSG00000026074(Map4k4),ENSMUSG00000009376(Met),ENSMUSG00000027368(Dusp2),ENSMUSG00000002983(Relb),ENSMUSG00000024620(Pdgfrb),ENSMUSG00000078815(Cacng6),ENSMUSG00000056220(Pla2g4a),ENSMUSG00000062232(Rapgef2),ENSMUSG00000029377(Ereg),ENS…	ENSMUSG00000052684(Jun),ENSMUSG00000037337(Map4k1),ENSMUSG00000019960(Dusp6),ENSMUSG00000028862(Map3k6),ENSMUSG00000059970(Hspa2),ENSMUSG00000031383(Dusp9),ENSMUSG00000028019(Pdgfc),ENSMUSG00000028864(Hgf),ENSMUSG00000028832(Stmn1),ENSMUSG00000024962(Vegfb),ENSMUSG00000022414(Tab1),ENSMUSG00000021253(Tgfb3),ENSMUSG00000031565(Fgfr1),ENSMUSG00000005534(Insr),ENSMUSG00000028017(Egf),ENSMUSG00000032…	http://www.kegg.jp/kegg-bin/show_pathway?map04010/K04415%09%23FFFFFF,red/K04461%09%23FFFFFF,red/K04388%09%23FFFFFF,green/K07830%09%23FFFFFF,red/K04440%09%23FFFFFF,red/K09784%09%23FFFFFF,red/K02580%09%23FFFFFF,red/K21946%09%23FFFFFF,green/K04408%09%23FFFFFF,green/K04441%09%23FFFFFF,red/K19662%09%23FFFFFF,red/K04377%09%23FFFFFF,red/K04412%09%23FFFFFF,red/K04346%09%23FFFFFF,green/K04381%09%23FFFFFF,…
mmu04933	AGE-RAGE signaling pathway in diabetic complications	Human Diseases	Endocrine and metabolic diseases	32	13	45	99	2.32632e-06	2.22058e-05	ENSMUSG00000031503(Col4a2),ENSMUSG00000035385(Ccl2),ENSMUSG00000037411(Serpine1),ENSMUSG00000039936(Pik3cd),ENSMUSG00000031520(Vegfc),ENSMUSG00000041417(Pik3r1),ENSMUSG00000027962(Vcam1),ENSMUSG00000026582(Sele),ENSMUSG00000004040(Stat3),ENSMUSG00000025746(Il6),ENSMUSG00000028128(F3),ENSMUSG00000024789(Jak2),ENSMUSG00000031740(Mmp2),ENSMUSG00000035352(Ccl12),ENSMUSG00000027398(Il1b),ENSMUSG000000…	ENSMUSG00000006728(Cdk4),ENSMUSG00000016933(Plcg1),ENSMUSG00000033016(Nfatc1),ENSMUSG00000021253(Tgfb3),ENSMUSG00000044167(Foxo1),ENSMUSG00000074743(Thbd),ENSMUSG00000052684(Jun),ENSMUSG00000024962(Vegfb),ENSMUSG00000040061(Plcb2),ENSMUSG00000031834(Pik3r2),ENSMUSG00000007613(Tgfbr1),ENSMUSG00000032440(Tgfbr2),ENSMUSG00000070348(Ccnd1)	http://www.kegg.jp/kegg-bin/show_pathway?map04933/K11223%09%23FFFFFF,red/K05405%09%23FFFFFF,red/K07201%09%23FFFFFF,green/K03156%09%23FFFFFF,red/K21421%09%23FFFFFF,red/K04692%09%23FFFFFF,red/K11220%09%23FFFFFF,red/K05858%09%23FFFFFF,purple/K04702%09%23FFFFFF,red/K04503%09%23FFFFFF,green/K02649%09%23FFFFFF,purple/K04440%09%23FFFFFF,red/K05449%09%23FFFFFF,red/K08008%09%23FFFFFF,red/K02089%09%23FFFFF…
mmu04015	Rap1 signaling pathway	Environmental Information Processing	Signal transduction	51	29	80	209	2.65001e-06	2.45516e-05	ENSMUSG00000030403(Vasp),ENSMUSG00000014599(Csf1),ENSMUSG00000024960(Plcb3),ENSMUSG00000042700(Sipa1l1),ENSMUSG00000029580(Actb),ENSMUSG00000062825(Actg1),ENSMUSG00000006134(Crkl),ENSMUSG00000001175(Calm1),ENSMUSG00000026821(Ralgds),ENSMUSG00000002413(Braf),ENSMUSG00000053137(Mapk11),ENSMUSG00000034101(Ctnnd1),ENSMUSG00000052889(Prkcb),ENSMUSG00000022148(Fyb),ENSMUSG00000030786(Itgam),ENSMUSG0000…	ENSMUSG00000031465(Angpt2),ENSMUSG00000025856(Pdgfa),ENSMUSG00000071042(Rasgrp3),ENSMUSG00000037533(Rapgef6),ENSMUSG00000005580(Adcy9),ENSMUSG00000022469(Rapgef3),ENSMUSG00000031659(Adcy7),ENSMUSG00000028017(Egf),ENSMUSG00000005534(Insr),ENSMUSG00000031565(Fgfr1),ENSMUSG00000020654(Adcy3),ENSMUSG00000042745(Id1),ENSMUSG00000041187(Prkd2),ENSMUSG00000005699(Pard6a),ENSMUSG00000024962(Vegfb),ENSMUS…	http://www.kegg.jp/kegg-bin/show_pathway?map04015/K04266%09%23FFFFFF,red/K04368%09%23FFFFFF,red/K16858%09%23FFFFFF,green/K05099%09%23FFFFFF,red/K00922%09%23FFFFFF,red/K08015%09%23FFFFFF,green/K06493%09%23FFFFFF,green/K08732%09%23FFFFFF,red/K17698%09%23FFFFFF,red/K05718%09%23FFFFFF,red/K12362%09%23FFFFFF,green/K07361%09%23FFFFFF,red/K04359%09%23FFFFFF,green/K07860%09%23FFFFFF,red/K04275%09%23FFFFF…
mmu05222	Small cell lung cancer	Human Diseases	Cancers: Specific types	26	16	42	92	4.35815e-06	3.92233e-05	ENSMUSG00000057789(Bak1),ENSMUSG00000024927(Rela),ENSMUSG00000020826(Nos2),ENSMUSG00000032000(Birc3),ENSMUSG00000026875(Traf1),ENSMUSG00000022346(Myc),ENSMUSG00000023067(Cdkn1a),ENSMUSG00000057367(Birc2),ENSMUSG00000028698(Pik3r3),ENSMUSG00000021025(Nfkbia),ENSMUSG00000040274(Cdk6),ENSMUSG00000026942(Traf2),ENSMUSG00000062248(Cks2),ENSMUSG00000016477(E2f3),ENSMUSG00000019979(Apaf1),ENSMUSG0000006…	ENSMUSG00000027490(E2f1),ENSMUSG00000070348(Ccnd1),ENSMUSG00000018983(E2f2),ENSMUSG00000022105(Rb1),ENSMUSG00000027111(Itga6),ENSMUSG00000002109(Ddb2),ENSMUSG00000021453(Gadd45g),ENSMUSG00000028914(Casp9),ENSMUSG00000039656(Rxrb),ENSMUSG00000021668(Polk),ENSMUSG00000031834(Pik3r2),ENSMUSG00000054115(Skp2),ENSMUSG00000015846(Rxra),ENSMUSG00000024421(Lama3),ENSMUSG00000025358(Cdk2),ENSMUSG000000067…	http://www.kegg.jp/kegg-bin/show_pathway?map05222/K07210%09%23FFFFFF,red/K16060%09%23FFFFFF,red/K04734%09%23FFFFFF,red/K14021%09%23FFFFFF,red/K10140%09%23FFFFFF,green/K03875%09%23FFFFFF,green/K02580%09%23FFFFFF,red/K06618%09%23FFFFFF,green/K06237%09%23FFFFFF,red/K04399%09%23FFFFFF,green/K03172%09%23FFFFFF,red/K02084%09%23FFFFFF,red/K04377%09%23FFFFFF,red/K00922%09%23FFFFFF,red/K03511%09%23FFFFFF,…
mmu04210	Apoptosis	Cellular Processes	Cell growth and death	39	17	56	135	5.08007e-06	4.44506e-05	ENSMUSG00000099974(Bcl2a1d),ENSMUSG00000034573(Ptpn13),ENSMUSG00000021936(Mapk8),ENSMUSG00000028163(Nfkb1),ENSMUSG00000071369(Map3k5),ENSMUSG00000019979(Apaf1),ENSMUSG00000024401(Tnf),ENSMUSG00000026942(Traf2),ENSMUSG00000021116(Eif2s1),ENSMUSG00000030341(Tnfrsf1a),ENSMUSG00000028698(Pik3r3),ENSMUSG00000021025(Nfkbia),ENSMUSG00000015312(Gadd45b),ENSMUSG00000004221(Ikbkg),ENSMUSG00000041417(Pik3r1…	ENSMUSG00000052684(Jun),ENSMUSG00000025507(Pidd1),ENSMUSG00000027997(Casp6),ENSMUSG00000031834(Pik3r2),ENSMUSG00000029027(Dffb),ENSMUSG00000015337(Endog),ENSMUSG00000028914(Casp9),ENSMUSG00000024590(Lmnb1),ENSMUSG00000021453(Gadd45g),ENSMUSG00000031077(Fadd),ENSMUSG00000002083(Bbc3),ENSMUSG00000042644(Itpr3),ENSMUSG00000029863(Casp2),ENSMUSG00000068329(Htra2),ENSMUSG00000021250(Fos),ENSMUSG000000…	http://www.kegg.jp/kegg-bin/show_pathway?map04210/K04379%09%23FFFFFF,green/K00922%09%23FFFFFF,red/K07210%09%23FFFFFF,red/K01275%09%23FFFFFF,red/K04741%09%23FFFFFF,red/K02311%09%23FFFFFF,green/K10798%09%23FFFFFF,red/K02580%09%23FFFFFF,red/K10130%09%23FFFFFF,green/K04399%09%23FFFFFF,green/K04398%09%23FFFFFF,red/K04426%09%23FFFFFF,red/K04397%09%23FFFFFF,red/K04440%09%23FFFFFF,red/K02162%09%23FFFFFF,…
mmu05418	Fluid shear stress and atherosclerosis	Human Diseases	Cardiovascular diseases	46	12	58	142	6.17806e-06	5.2597e-05	ENSMUSG00000005413(Hmox1),ENSMUSG00000062825(Actg1),ENSMUSG00000035352(Ccl12),ENSMUSG00000031740(Mmp2),ENSMUSG00000027398(Il1b),ENSMUSG00000053137(Mapk11),ENSMUSG00000024927(Rela),ENSMUSG00000034220(Gpc1),ENSMUSG00000007655(Cav1),ENSMUSG00000015839(Nfe2l2),ENSMUSG00000033220(Rac2),ENSMUSG00000039936(Pik3cd),ENSMUSG00000041417(Pik3r1),ENSMUSG00000027962(Vcam1),ENSMUSG00000015837(Sqstm1),ENSMUSG000…	ENSMUSG00000033318(Gstt2),ENSMUSG00000061393(Acvr2b),ENSMUSG00000014158(Trpv4),ENSMUSG00000020689(Itgb3),ENSMUSG00000021250(Fos),ENSMUSG00000025856(Pdgfa),ENSMUSG00000004032(Gstm5),ENSMUSG00000005583(Mef2c),ENSMUSG00000001665(Gstt3),ENSMUSG00000031834(Pik3r2),ENSMUSG00000052684(Jun),ENSMUSG00000074743(Thbd)	http://www.kegg.jp/kegg-bin/show_pathway?map05418/K00799%09%23FFFFFF,purple/K00510%09%23FFFFFF,red/K02183%09%23FFFFFF,red/K14381%09%23FFFFFF,red/K05704%09%23FFFFFF,red/K07210%09%23FFFFFF,red/K02580%09%23FFFFFF,red/K04448%09%23FFFFFF,green/K06471%09%23FFFFFF,red/K06493%09%23FFFFFF,green/K06494%09%23FFFFFF,red/K04383%09%23FFFFFF,red/K05638%09%23FFFFFF,red/K00922%09%23FFFFFF,red/K04454%09%23FFFFFF,g…
mmu05212	Pancreatic cancer	Human Diseases	Cancers: Specific types	20	15	35	73	7.01696e-06	5.81669e-05	ENSMUSG00000020122(Egfr),ENSMUSG00000004936(Map2k1),ENSMUSG00000026104(Stat1),ENSMUSG00000002413(Braf),ENSMUSG00000057789(Bak1),ENSMUSG00000024927(Rela),ENSMUSG00000023067(Cdkn1a),ENSMUSG00000026821(Ralgds),ENSMUSG00000021936(Mapk8),ENSMUSG00000028163(Nfkb1),ENSMUSG00000004451(Ralb),ENSMUSG00000016477(E2f3),ENSMUSG00000004040(Stat3),ENSMUSG00000028698(Pik3r3),ENSMUSG00000040274(Cdk6),ENSMUSG00000…	ENSMUSG00000032440(Tgfbr2),ENSMUSG00000028017(Egf),ENSMUSG00000021253(Tgfb3),ENSMUSG00000018983(E2f2),ENSMUSG00000022105(Rb1),ENSMUSG00000028914(Casp9),ENSMUSG00000021453(Gadd45g),ENSMUSG00000002109(Ddb2),ENSMUSG00000007613(Tgfbr1),ENSMUSG00000070348(Ccnd1),ENSMUSG00000027490(E2f1),ENSMUSG00000041147(Brca2),ENSMUSG00000006728(Cdk4),ENSMUSG00000031834(Pik3r2),ENSMUSG00000021668(Polk)	http://www.kegg.jp/kegg-bin/show_pathway?map05212/K13377%09%23FFFFFF,green/K14021%09%23FFFFFF,red/K10140%09%23FFFFFF,green/K03511%09%23FFFFFF,green/K02580%09%23FFFFFF,red/K04735%09%23FFFFFF,red/K17454%09%23FFFFFF,green/K04357%09%23FFFFFF,green/K09389%09%23FFFFFF,green/K02089%09%23FFFFFF,green/K04674%09%23FFFFFF,green/K04361%09%23FFFFFF,red/K04388%09%23FFFFFF,green/K04692%09%23FFFFFF,red/K06620%09…
mmu04630	Jak-STAT signaling pathway	Environmental Information Processing	Signal transduction	53	12	65	167	1.1805e-05	9.53484e-05	ENSMUSG00000023067(Cdkn1a),ENSMUSG00000038485(Socs7),ENSMUSG00000023206(Il15ra),ENSMUSG00000017057(Il13ra1),ENSMUSG00000022346(Myc),ENSMUSG00000032578(Cish),ENSMUSG00000031712(Il15),ENSMUSG00000038067(Csf3),ENSMUSG00000049093(Il23r),ENSMUSG00000024539(Ptpn2),ENSMUSG00000018916(Csf2),ENSMUSG00000004296(Il12b),ENSMUSG00000020122(Egfr),ENSMUSG00000024379(Tslp),ENSMUSG00000062939(Stat4),ENSMUSG000000…	ENSMUSG00000025856(Pdgfa),ENSMUSG00000070348(Ccnd1),ENSMUSG00000006235(Epor),ENSMUSG00000027947(Il6ra),ENSMUSG00000028017(Egf),ENSMUSG00000003882(Il7r),ENSMUSG00000021756(Il6st),ENSMUSG00000031834(Pik3r2),ENSMUSG00000056153(Socs6),ENSMUSG00000000869(Il4),ENSMUSG00000028101(Pias3),ENSMUSG00000020027(Socs2)	http://www.kegg.jp/kegg-bin/show_pathway?map04630/K04447%09%23FFFFFF,red/K05079%09%23FFFFFF,green/K04503%09%23FFFFFF,green/K05074%09%23FFFFFF,red/K04361%09%23FFFFFF,red/K05418%09%23FFFFFF,red/K05137%09%23FFFFFF,red/K07293%09%23FFFFFF,red/K06625%09%23FFFFFF,red/K05425%09%23FFFFFF,red/K00157%09%23FFFFFF,red/K05423%09%23FFFFFF,red/K03099%09%23FFFFFF,red/K04692%09%23FFFFFF,red/K05443%09%23FFFFFF,red/…
mmu05223	Non-small cell lung cancer	Human Diseases	Cancers: Specific types	16	16	32	66	1.28288e-05	0.000101027	ENSMUSG00000016477(E2f3),ENSMUSG00000028698(Pik3r3),ENSMUSG00000040274(Cdk6),ENSMUSG00000004040(Stat3),ENSMUSG00000041417(Pik3r1),ENSMUSG00000015312(Gadd45b),ENSMUSG00000039936(Pik3cd),ENSMUSG00000032624(Eml4),ENSMUSG00000024241(Sos1),ENSMUSG00000004043(Stat5a),ENSMUSG00000057789(Bak1),ENSMUSG00000002413(Braf),ENSMUSG00000052889(Prkcb),ENSMUSG00000023067(Cdkn1a),ENSMUSG00000020122(Egfr),ENSMUSG00…	ENSMUSG00000021668(Polk),ENSMUSG00000031834(Pik3r2),ENSMUSG00000015846(Rxra),ENSMUSG00000026430(Rassf5),ENSMUSG00000016933(Plcg1),ENSMUSG00000006728(Cdk4),ENSMUSG00000027490(E2f1),ENSMUSG00000070348(Ccnd1),ENSMUSG00000028017(Egf),ENSMUSG00000018983(E2f2),ENSMUSG00000022105(Rb1),ENSMUSG00000048756(Foxo3),ENSMUSG00000021453(Gadd45g),ENSMUSG00000028914(Casp9),ENSMUSG00000039656(Rxrb),ENSMUSG00000002…	http://www.kegg.jp/kegg-bin/show_pathway?map05223/K08524%09%23FFFFFF,green/K08525%09%23FFFFFF,green/K10140%09%23FFFFFF,green/K17454%09%23FFFFFF,green/K02649%09%23FFFFFF,purple/K04365%09%23FFFFFF,red/K04692%09%23FFFFFF,red/K09408%09%23FFFFFF,green/K08015%09%23FFFFFF,green/K06625%09%23FFFFFF,red/K01116%09%23FFFFFF,green/K02091%09%23FFFFFF,red/K09389%09%23FFFFFF,green/K04402%09%23FFFFFF,purple/K0436…
mmu04660	T cell receptor signaling pathway	Organismal Systems	Immune system	29	14	43	100	2.15191e-05	0.000165329	ENSMUSG00000024241(Sos1),ENSMUSG00000022092(Ppp3cc),ENSMUSG00000004266(Ptpn6),ENSMUSG00000030602(Pak4),ENSMUSG00000028163(Nfkb1),ENSMUSG00000004221(Ikbkg),ENSMUSG00000023947(Nfkbie),ENSMUSG00000016529(Il10),ENSMUSG00000041417(Pik3r1),ENSMUSG00000022781(Pak2),ENSMUSG00000039936(Pik3cd),ENSMUSG00000024401(Tnf),ENSMUSG00000002699(Lcp2),ENSMUSG00000026285(Pdcd1),ENSMUSG00000028698(Pik3r3),ENSMUSG0000…	ENSMUSG00000026012(Cd28),ENSMUSG00000000869(Il4),ENSMUSG00000006728(Cdk4),ENSMUSG00000016933(Plcg1),ENSMUSG00000009621(Vav2),ENSMUSG00000052684(Jun),ENSMUSG00000031834(Pik3r2),ENSMUSG00000042351(Grap2),ENSMUSG00000033016(Nfatc1),ENSMUSG00000026117(Zap70),ENSMUSG00000029217(Tec),ENSMUSG00000036526(Card11),ENSMUSG00000021250(Fos),ENSMUSG00000027544(Nfatc2)	http://www.kegg.jp/kegg-bin/show_pathway?map04660/K04410%09%23FFFFFF,red/K04379%09%23FFFFFF,green/K04735%09%23FFFFFF,red/K07365%09%23FFFFFF,red/K04348%09%23FFFFFF,red/K05730%09%23FFFFFF,green/K06470%09%23FFFFFF,green/K05872%09%23FFFFFF,red/K06478%09%23FFFFFF,red/K05430%09%23FFFFFF,green/K05443%09%23FFFFFF,red/K07364%09%23FFFFFF,green/K07366%09%23FFFFFF,green/K04734%09%23FFFFFF,red/K01116%09%23FFF…
mmu03050	Proteasome	Genetic Information Processing	Folding, sorting and degradation	24	0	24	46	3.35753e-05	0.000251815	ENSMUSG00000021024(Psma6),ENSMUSG00000017428(Psmd11),ENSMUSG00000032301(Psma4),ENSMUSG00000028932(Psmc2),ENSMUSG00000060073(Psma3),ENSMUSG00000078652(Psme3),ENSMUSG00000078153(Psme2b),ENSMUSG00000039041(Adrm1),ENSMUSG00000022216(Psme1),ENSMUSG00000026750(Psmb7),ENSMUSG00000026914(Psmd14),ENSMUSG00000021737(Psmd6),ENSMUSG00000024338(Psmb8),ENSMUSG00000015671(Psma2),ENSMUSG00000096727(Psmb9),ENSMUS…	-	http://www.kegg.jp/kegg-bin/show_pathway?map03050/K02730%09%23FFFFFF,red/K03061%09%23FFFFFF,red/K06698%09%23FFFFFF,red/K02728%09%23FFFFFF,red/K02738%09%23FFFFFF,red/K02736%09%23FFFFFF,red/K06697%09%23FFFFFF,red/K02726%09%23FFFFFF,red/K02740%09%23FFFFFF,red/K06696%09%23FFFFFF,red/K02727%09%23FFFFFF,red/K02733%09%23FFFFFF,red/K03030%09%23FFFFFF,red/K11599%09%23FFFFFF,red/K03038%09%23FFFFFF,red/K027…
mmu04662	B cell receptor signaling pathway	Organismal Systems	Immune system	23	9	32	69	3.9697e-05	0.000290804	ENSMUSG00000023947(Nfkbie),ENSMUSG00000004221(Ikbkg),ENSMUSG00000028698(Pik3r3),ENSMUSG00000024241(Sos1),ENSMUSG00000004266(Ptpn6),ENSMUSG00000028163(Nfkb1),ENSMUSG00000030595(Nfkbib),ENSMUSG00000028191(Bcl10),ENSMUSG00000032688(Malt1),ENSMUSG00000052889(Prkcb),ENSMUSG00000025491(Ifitm1),ENSMUSG00000004936(Map2k1),ENSMUSG00000041417(Pik3r1),ENSMUSG00000039936(Pik3cd),ENSMUSG00000033220(Rac2),ENSM…	ENSMUSG00000026288(Inpp5d),ENSMUSG00000031834(Pik3r2),ENSMUSG00000009621(Vav2),ENSMUSG00000052684(Jun),ENSMUSG00000021250(Fos),ENSMUSG00000027544(Nfatc2),ENSMUSG00000071042(Rasgrp3),ENSMUSG00000033016(Nfatc1),ENSMUSG00000036526(Card11)	http://www.kegg.jp/kegg-bin/show_pathway?map04662/K07860%09%23FFFFFF,red/K00922%09%23FFFFFF,red/K05854%09%23FFFFFF,red/K03099%09%23FFFFFF,red/K04348%09%23FFFFFF,red/K04446%09%23FFFFFF,green/K04368%09%23FFFFFF,red/K07210%09%23FFFFFF,red/K07369%09%23FFFFFF,red/K02581%09%23FFFFFF,red/K05730%09%23FFFFFF,green/K04734%09%23FFFFFF,red/K07367%09%23FFFFFF,green/K19831%09%23FFFFFF,red/K04379%09%23FFFFFF,gr…
mmu05416	Viral myocarditis	Human Diseases	Cardiovascular diseases	29	5	34	76	5.77951e-05	0.00041376	ENSMUSG00000092243(Gm7030),ENSMUSG00000005610(Eif4g2),ENSMUSG00000036594(H2-Aa),ENSMUSG00000026399(Cd55),ENSMUSG00000007655(Cav1),ENSMUSG00000035929(H2-Q4),ENSMUSG00000056116(H2-T22),ENSMUSG00000062825(Actg1),ENSMUSG00000030830(Itgal),ENSMUSG00000073421(H2-Ab1),ENSMUSG00000037649(H2-DMa),ENSMUSG00000024334(H2-Oa),ENSMUSG00000017652(Cd40),ENSMUSG00000041538(H2-Ob),ENSMUSG00000016283(H2-M2),ENSMUSG…	ENSMUSG00000039952(Dag1),ENSMUSG00000026012(Cd28),ENSMUSG00000028914(Casp9),ENSMUSG00000070348(Ccnd1),ENSMUSG00000026842(Abl1)	http://www.kegg.jp/kegg-bin/show_pathway?map05416/K05718%09%23FFFFFF,red/K06752%09%23FFFFFF,red/K04399%09%23FFFFFF,green/K05412%09%23FFFFFF,red/K03160%09%23FFFFFF,red/K06470%09%23FFFFFF,green/K06490%09%23FFFFFF,red/K04503%09%23FFFFFF,green/K08738%09%23FFFFFF,red/K06619%09%23FFFFFF,green/K05413%09%23FFFFFF,red/K06751%09%23FFFFFF,red/K04006%09%23FFFFFF,red/K06265%09%23FFFFFF,green/K04398%09%23FFFFF…
mmu05330	Allograft rejection	Human Diseases	Immune diseases	24	2	26	53	6.35866e-05	0.000445106	ENSMUSG00000024401(Tnf),ENSMUSG00000016529(Il10),ENSMUSG00000060586(H2-Eb1),ENSMUSG00000053835(H2-T24),ENSMUSG00000067212(H2-T23),ENSMUSG00000016206(H2-M3),ENSMUSG00000022901(Cd86),ENSMUSG00000061232(H2-K1),ENSMUSG00000079547(H2-DMb1),ENSMUSG00000004296(Il12b),ENSMUSG00000015437(Gzmb),ENSMUSG00000024334(H2-Oa),ENSMUSG00000041538(H2-Ob),ENSMUSG00000017652(Cd40),ENSMUSG00000075122(Cd80),ENSMUSG0000…	ENSMUSG00000000869(Il4),ENSMUSG00000026012(Cd28)	http://www.kegg.jp/kegg-bin/show_pathway?map05330/K04390%09%23FFFFFF,red/K05443%09%23FFFFFF,red/K05413%09%23FFFFFF,red/K05430%09%23FFFFFF,green/K05412%09%23FFFFFF,red/K01353%09%23FFFFFF,red/K05406%09%23FFFFFF,red/K06751%09%23FFFFFF,red/K06752%09%23FFFFFF,red/K05425%09%23FFFFFF,red/K03156%09%23FFFFFF,red/K03160%09%23FFFFFF,red/K06470%09%23FFFFFF,green/
mmu04672	Intestinal immune network for IgA production	Organismal Systems	Immune system	17	5	22	42	6.5655e-05	0.000449594	ENSMUSG00000079547(H2-DMb1),ENSMUSG00000022901(Cd86),ENSMUSG00000031712(Il15),ENSMUSG00000023206(Il15ra),ENSMUSG00000027009(Itga4),ENSMUSG00000060586(H2-Eb1),ENSMUSG00000029530(Ccr9),ENSMUSG00000000732(Icosl),ENSMUSG00000016529(Il10),ENSMUSG00000036594(H2-Aa),ENSMUSG00000025746(Il6),ENSMUSG00000073421(H2-Ab1),ENSMUSG00000037649(H2-DMa),ENSMUSG00000041538(H2-Ob),ENSMUSG00000017652(Cd40),ENSMUSG000…	ENSMUSG00000045382(Cxcr4),ENSMUSG00000000869(Il4),ENSMUSG00000089669(Tnfsf13),ENSMUSG00000044052(Ccr10),ENSMUSG00000026012(Cd28)	http://www.kegg.jp/kegg-bin/show_pathway?map04672/K03160%09%23FFFFFF,red/K05430%09%23FFFFFF,green/K06752%09%23FFFFFF,red/K05475%09%23FFFFFF,green/K05412%09%23FFFFFF,red/K05413%09%23FFFFFF,red/K06483%09%23FFFFFF,red/K05074%09%23FFFFFF,red/K05443%09%23FFFFFF,red/K06470%09%23FFFFFF,green/K04185%09%23FFFFFF,green/K04189%09%23FFFFFF,green/K06710%09%23FFFFFF,red/K05433%09%23FFFFFF,red/K05405%09%23FFFFF…
mmu05214	Glioma	Human Diseases	Cancers: Specific types	17	16	33	74	7.97805e-05	0.000534699	ENSMUSG00000004936(Map2k1),ENSMUSG00000023067(Cdkn1a),ENSMUSG00000001175(Calm1),ENSMUSG00000002413(Braf),ENSMUSG00000057789(Bak1),ENSMUSG00000052889(Prkcb),ENSMUSG00000020184(Mdm2),ENSMUSG00000024241(Sos1),ENSMUSG00000053819(Camk2d),ENSMUSG00000016477(E2f3),ENSMUSG00000040274(Cdk6),ENSMUSG00000028698(Pik3r3),ENSMUSG00000020122(Egfr),ENSMUSG00000024620(Pdgfrb),ENSMUSG00000015312(Gadd45b),ENSMUSG00…	ENSMUSG00000022105(Rb1),ENSMUSG00000018983(E2f2),ENSMUSG00000025856(Pdgfa),ENSMUSG00000070348(Ccnd1),ENSMUSG00000035109(Shc4),ENSMUSG00000031834(Pik3r2),ENSMUSG00000021668(Polk),ENSMUSG00000021820(Camk2g),ENSMUSG00000021453(Gadd45g),ENSMUSG00000002109(Ddb2),ENSMUSG00000020312(Shc2),ENSMUSG00000028017(Egf),ENSMUSG00000030272(Camk1),ENSMUSG00000027490(E2f1),ENSMUSG00000006728(Cdk4),ENSMUSG000000169…	http://www.kegg.jp/kegg-bin/show_pathway?map05214/K09389%09%23FFFFFF,green/K02091%09%23FFFFFF,red/K04365%09%23FFFFFF,red/K17449%09%23FFFFFF,green/K04359%09%23FFFFFF,green/K06618%09%23FFFFFF,green/K02089%09%23FFFFFF,green/K17454%09%23FFFFFF,green/K04515%09%23FFFFFF,purple/K14021%09%23FFFFFF,red/K04357%09%23FFFFFF,green/K17447%09%23FFFFFF,green/K06625%09%23FFFFFF,red/K08794%09%23FFFFFF,green/K10140…
mmu05144	Malaria	Human Diseases	Infectious diseases: Parasitic	23	3	26	54	9.4802e-05	0.000622138	ENSMUSG00000021702(Thbs4),ENSMUSG00000038067(Csf3),ENSMUSG00000027995(Tlr2),ENSMUSG00000090523(Gypc),ENSMUSG00000020592(Sdc1),ENSMUSG00000009376(Met),ENSMUSG00000030149(Klrk1),ENSMUSG00000020717(Pecam1),ENSMUSG00000024401(Tnf),ENSMUSG00000037405(Icam1),ENSMUSG00000016529(Il10),ENSMUSG00000025746(Il6),ENSMUSG00000040152(Thbs1),ENSMUSG00000027398(Il1b),ENSMUSG00000035352(Ccl12),ENSMUSG00000030830(I…	ENSMUSG00000040249(Lrp1),ENSMUSG00000021253(Tgfb3),ENSMUSG00000028864(Hgf)	http://www.kegg.jp/kegg-bin/show_pathway?map05144/K04729%09%23FFFFFF,red/K05482%09%23FFFFFF,red/K05443%09%23FFFFFF,red/K05099%09%23FFFFFF,red/K03160%09%23FFFFFF,red/K04519%09%23FFFFFF,red/K13377%09%23FFFFFF,green/K03156%09%23FFFFFF,red/K06490%09%23FFFFFF,red/K14624%09%23FFFFFF,red/K06471%09%23FFFFFF,red/K04659%09%23FFFFFF,red/K05718%09%23FFFFFF,red/K05406%09%23FFFFFF,red/K06494%09%23FFFFFF,red/K0…
mmu04940	Type I diabetes mellitus	Human Diseases	Endocrine and metabolic diseases	26	2	28	60	0.000103489	0.000665285	ENSMUSG00000041538(H2-Ob),ENSMUSG00000024334(H2-Oa),ENSMUSG00000075122(Cd80),ENSMUSG00000016283(H2-M2),ENSMUSG00000073421(H2-Ab1),ENSMUSG00000027776(Il12a),ENSMUSG00000037649(H2-DMa),ENSMUSG00000027398(Il1b),ENSMUSG00000056116(H2-T22),ENSMUSG00000035929(H2-Q4),ENSMUSG00000024778(Fas),ENSMUSG00000036594(H2-Aa),ENSMUSG00000024402(Lta),ENSMUSG00000092243(Gm7030),ENSMUSG00000024401(Tnf),ENSMUSG000000…	ENSMUSG00000026012(Cd28),ENSMUSG00000062995(Ica1)	http://www.kegg.jp/kegg-bin/show_pathway?map04940/K05413%09%23FFFFFF,red/K06752%09%23FFFFFF,red/K04519%09%23FFFFFF,red/K04390%09%23FFFFFF,red/K04383%09%23FFFFFF,red/K01353%09%23FFFFFF,red/K19863%09%23FFFFFF,green/K05412%09%23FFFFFF,red/K05468%09%23FFFFFF,red/K03156%09%23FFFFFF,red/K06751%09%23FFFFFF,red/K06470%09%23FFFFFF,green/K05425%09%23FFFFFF,red/K07817%09%23FFFFFF,red/K05406%09%23FFFFFF,red/
mmu05132	Salmonella infection	Human Diseases	Infectious diseases: Bacterial	27	6	33	75	0.000109925	0.000692526	ENSMUSG00000025746(Il6),ENSMUSG00000020580(Rock2),ENSMUSG00000000982(Ccl3),ENSMUSG00000025888(Casp1),ENSMUSG00000024927(Rela),ENSMUSG00000053137(Mapk11),ENSMUSG00000027398(Il1b),ENSMUSG00000027399(Il1a),ENSMUSG00000018916(Csf2),ENSMUSG00000073982(Rhog),ENSMUSG00000024290(Rock1),ENSMUSG00000062825(Actg1),ENSMUSG00000029379(Cxcl3),ENSMUSG00000029580(Actb),ENSMUSG00000020826(Nos2),ENSMUSG00000021936…	ENSMUSG00000003546(Klc4),ENSMUSG00000021250(Fos),ENSMUSG00000052684(Jun),ENSMUSG00000052688(Rab7b),ENSMUSG00000027805(Pfn2),ENSMUSG00000028917(Plekhm2)	http://www.kegg.jp/kegg-bin/show_pathway?map05132/K05427%09%23FFFFFF,red/K04440%09%23FFFFFF,red/K04514%09%23FFFFFF,red/K05759%09%23FFFFFF,green/K04391%09%23FFFFFF,red/K15348%09%23FFFFFF,green/K05754%09%23FFFFFF,red/K04729%09%23FFFFFF,red/K02580%09%23FFFFFF,red/K04735%09%23FFFFFF,red/K04519%09%23FFFFFF,red/K04379%09%23FFFFFF,green/K12964%09%23FFFFFF,red/K04383%09%23FFFFFF,red/K05408%09%23FFFFFF,re…
mmu04330	Notch signaling pathway	Environmental Information Processing	Signal transduction	15	11	26	55	0.000139023	0.000858669	ENSMUSG00000026923(Notch1),ENSMUSG00000024642(Tle4),ENSMUSG00000014773(Dll1),ENSMUSG00000052593(Adam17),ENSMUSG00000027878(Notch2),ENSMUSG00000027276(Jag1),ENSMUSG00000004947(Dtx2),ENSMUSG00000049502(Dtx3l),ENSMUSG00000028800(Hdac1),ENSMUSG00000000708(Kat2b),ENSMUSG00000039191(Rbpj),ENSMUSG00000032375(Aph1b),ENSMUSG00000021039(Snw1),ENSMUSG00000031925(Maml2),ENSMUSG00000032280(Tle3)	ENSMUSG00000034771(Tle2),ENSMUSG00000020888(Dvl2),ENSMUSG00000025158(Rfng),ENSMUSG00000053040(Aph1c),ENSMUSG00000029570(Lfng),ENSMUSG00000041777(Cir1),ENSMUSG00000034758(Tle6),ENSMUSG00000008305(Tle1),ENSMUSG00000010609(Psen2),ENSMUSG00000040415(Dtx3),ENSMUSG00000029478(Ncor2)	http://www.kegg.jp/kegg-bin/show_pathway?map04330/K04497%09%23FFFFFF,purple/K06059%09%23FFFFFF,red/K04522%09%23FFFFFF,green/K06051%09%23FFFFFF,red/K06172%09%23FFFFFF,purple/K06062%09%23FFFFFF,red/K02353%09%23FFFFFF,green/K06061%09%23FFFFFF,red/K06052%09%23FFFFFF,red/K20994%09%23FFFFFF,red/K05948%09%23FFFFFF,green/K06053%09%23FFFFFF,red/K02599%09%23FFFFFF,red/K06065%09%23FFFFFF,green/K06067%09%23F…
mmu04612	Antigen processing and presentation	Organismal Systems	Immune system	31	3	34	79	0.000147856	0.000895664	ENSMUSG00000079547(H2-DMb1),ENSMUSG00000061232(H2-K1),ENSMUSG00000060802(B2m),ENSMUSG00000053835(H2-T24),ENSMUSG00000016206(H2-M3),ENSMUSG00000067212(H2-T23),ENSMUSG00000024610(Cd74),ENSMUSG00000056116(H2-T22),ENSMUSG00000022504(Ciita),ENSMUSG00000035929(H2-Q4),ENSMUSG00000078153(Psme2b),ENSMUSG00000090877(Hspa1b),ENSMUSG00000036594(H2-Aa),ENSMUSG00000020248(Nfyb),ENSMUSG00000092243(Gm7030),ENSMU…	ENSMUSG00000036120(Rfxank),ENSMUSG00000036615(Rfxap),ENSMUSG00000059970(Hspa2)	http://www.kegg.jp/kegg-bin/show_pathway?map04612/K06751%09%23FFFFFF,red/K06505%09%23FFFFFF,red/K08061%09%23FFFFFF,red/K06697%09%23FFFFFF,red/K05653%09%23FFFFFF,red/K04079%09%23FFFFFF,red/K08065%09%23FFFFFF,red/K06696%09%23FFFFFF,red/K08060%09%23FFFFFF,red/K06698%09%23FFFFFF,red/K08062%09%23FFFFFF,green/K08055%09%23FFFFFF,red/K03283%09%23FFFFFF,purple/K08058%09%23FFFFFF,red/K08063%09%23FFFFFF,gre…
mmu04670	Leukocyte transendothelial migration	Organismal Systems	Immune system	35	10	45	114	0.000168428	0.00100103	ENSMUSG00000030830(Itgal),ENSMUSG00000021823(Vcl),ENSMUSG00000053062(Jam2),ENSMUSG00000052397(Ezr),ENSMUSG00000055976(Cldn23),ENSMUSG00000058230(Arhgap35),ENSMUSG00000039936(Pik3cd),ENSMUSG00000033220(Rac2),ENSMUSG00000038235(F11r),ENSMUSG00000041417(Pik3r1),ENSMUSG00000027962(Vcam1),ENSMUSG00000000001(Gnai3),ENSMUSG00000034101(Ctnnd1),ENSMUSG00000030786(Itgam),ENSMUSG00000053137(Mapk11),ENSMUSG0…	ENSMUSG00000016933(Plcg1),ENSMUSG00000056917(Sipa1),ENSMUSG00000029204(Rhoh),ENSMUSG00000022469(Rapgef3),ENSMUSG00000035133(Arhgap5),ENSMUSG00000026430(Rassf5),ENSMUSG00000009621(Vav2),ENSMUSG00000031834(Pik3r2),ENSMUSG00000034868(Myl12b),ENSMUSG00000045382(Cxcr4)	http://www.kegg.jp/kegg-bin/show_pathway?map04670/K13709%09%23FFFFFF,green/K06483%09%23FFFFFF,red/K05763%09%23FFFFFF,red/K06087%09%23FFFFFF,red/K08014%09%23FFFFFF,green/K12757%09%23FFFFFF,green/K07860%09%23FFFFFF,red/K04441%09%23FFFFFF,red/K06735%09%23FFFFFF,red/K05732%09%23FFFFFF,red/K04353%09%23FFFFFF,red/K08007%09%23FFFFFF,red/K06274%09%23FFFFFF,red/K00922%09%23FFFFFF,red/K05700%09%23FFFFFF,re…
mmu05332	Graft-versus-host disease	Human Diseases	Immune diseases	23	1	24	50	0.000185317	0.00108101	ENSMUSG00000015437(Gzmb),ENSMUSG00000025746(Il6),ENSMUSG00000092243(Gm7030),ENSMUSG00000036594(H2-Aa),ENSMUSG00000024778(Fas),ENSMUSG00000035929(H2-Q4),ENSMUSG00000056116(H2-T22),ENSMUSG00000016206(H2-M3),ENSMUSG00000067212(H2-T23),ENSMUSG00000053835(H2-T24),ENSMUSG00000022901(Cd86),ENSMUSG00000061232(H2-K1),ENSMUSG00000027399(Il1a),ENSMUSG00000027398(Il1b),ENSMUSG00000079547(H2-DMb1),ENSMUSG0000…	ENSMUSG00000026012(Cd28)	http://www.kegg.jp/kegg-bin/show_pathway?map05332/K06751%09%23FFFFFF,red/K04383%09%23FFFFFF,red/K04519%09%23FFFFFF,red/K05413%09%23FFFFFF,red/K03156%09%23FFFFFF,red/K05405%09%23FFFFFF,red/K01353%09%23FFFFFF,red/K04390%09%23FFFFFF,red/K06752%09%23FFFFFF,red/K05412%09%23FFFFFF,red/K06470%09%23FFFFFF,green/
mmu04115	p53 signaling pathway	Cellular Processes	Cell growth and death	16	15	31	71	0.000208241	0.00119265	ENSMUSG00000040274(Cdk6),ENSMUSG00000020184(Mdm2),ENSMUSG00000040749(Siah1b),ENSMUSG00000027215(Cd82),ENSMUSG00000023067(Cdkn1a),ENSMUSG00000040782(Cop1),ENSMUSG00000026029(Casp8),ENSMUSG00000029385(Ccng2),ENSMUSG00000015312(Gadd45b),ENSMUSG00000004446(Bid),ENSMUSG00000063694(Cycs),ENSMUSG00000019979(Apaf1),ENSMUSG00000000184(Ccnd2),ENSMUSG00000037411(Serpine1),ENSMUSG00000024778(Fas),ENSMUSG0000…	ENSMUSG00000064326(Siva1),ENSMUSG00000025507(Pidd1),ENSMUSG00000025358(Cdk2),ENSMUSG00000019942(Cdk1),ENSMUSG00000070348(Ccnd1),ENSMUSG00000038332(Sesn1),ENSMUSG00000028914(Casp9),ENSMUSG00000027663(Zmat3),ENSMUSG00000029521(Chek2),ENSMUSG00000006728(Cdk4),ENSMUSG00000028893(Sesn2),ENSMUSG00000002083(Bbc3),ENSMUSG00000026389(Steap3),ENSMUSG00000021453(Gadd45g),ENSMUSG00000002109(Ddb2)	http://www.kegg.jp/kegg-bin/show_pathway?map04115/K16857%09%23FFFFFF,red/K10140%09%23FFFFFF,green/K06641%09%23FFFFFF,green/K04402%09%23FFFFFF,purple/K10142%09%23FFFFFF,green/K04390%09%23FFFFFF,red/K06625%09%23FFFFFF,red/K22744%09%23FFFFFF,green/K02091%09%23FFFFFF,red/K10141%09%23FFFFFF,green/K20394%09%23FFFFFF,green/K08738%09%23FFFFFF,red/K04399%09%23FFFFFF,green/K10151%09%23FFFFFF,red/K10146%09%…
mmu05210	Colorectal cancer	Human Diseases	Cancers: Specific types	19	17	36	87	0.000247991	0.00139495	ENSMUSG00000041417(Pik3r1),ENSMUSG00000015312(Gadd45b),ENSMUSG00000033220(Rac2),ENSMUSG00000039936(Pik3cd),ENSMUSG00000063694(Cycs),ENSMUSG00000029377(Ereg),ENSMUSG00000004451(Ralb),ENSMUSG00000020122(Egfr),ENSMUSG00000028698(Pik3r3),ENSMUSG00000021936(Mapk8),ENSMUSG00000024241(Sos1),ENSMUSG00000057789(Bak1),ENSMUSG00000002413(Braf),ENSMUSG00000023067(Cdkn1a),ENSMUSG00000026821(Ralgds),ENSMUSG000…	ENSMUSG00000005370(Msh6),ENSMUSG00000002083(Bbc3),ENSMUSG00000032498(Mlh1),ENSMUSG00000028017(Egf),ENSMUSG00000021253(Tgfb3),ENSMUSG00000021453(Gadd45g),ENSMUSG00000002109(Ddb2),ENSMUSG00000021668(Polk),ENSMUSG00000031834(Pik3r2),ENSMUSG00000052684(Jun),ENSMUSG00000024151(Msh2),ENSMUSG00000070348(Ccnd1),ENSMUSG00000017716(Birc5),ENSMUSG00000021250(Fos),ENSMUSG00000032440(Tgfbr2),ENSMUSG0000002891…	http://www.kegg.jp/kegg-bin/show_pathway?map05210/K04379%09%23FFFFFF,green/K04377%09%23FFFFFF,red/K04399%09%23FFFFFF,green/K08733%09%23FFFFFF,red/K08738%09%23FFFFFF,red/K08731%09%23FFFFFF,green/K13377%09%23FFFFFF,green/K14021%09%23FFFFFF,red/K03099%09%23FFFFFF,red/K09782%09%23FFFFFF,red/K08735%09%23FFFFFF,green/K04440%09%23FFFFFF,red/K02649%09%23FFFFFF,purple/K08732%09%23FFFFFF,red/K04503%09%23FF…
mmu04137	Mitophagy - animal	Cellular Processes	Transport and catabolism	14	14	28	63	0.000289888	0.00157439	ENSMUSG00000078566(Bnip3),ENSMUSG00000033124(Atg9a),ENSMUSG00000020124(Usp15),ENSMUSG00000055723(Rras2),ENSMUSG00000024927(Rela),ENSMUSG00000004535(Tax1bp1),ENSMUSG00000039910(Cited2),ENSMUSG00000046707(Csnk2a2),ENSMUSG00000021936(Mapk8),ENSMUSG00000020115(Tbk1),ENSMUSG00000035158(Mitf),ENSMUSG00000027646(Src),ENSMUSG00000015837(Sqstm1),ENSMUSG00000021109(Hif1a)	ENSMUSG00000048756(Foxo3),ENSMUSG00000017119(Nbr1),ENSMUSG00000028756(Pink1),ENSMUSG00000038520(Tbc1d17),ENSMUSG00000025733(Rhot2),ENSMUSG00000027490(E2f1),ENSMUSG00000031668(Eif2ak3),ENSMUSG00000023990(Tfeb),ENSMUSG00000052684(Jun),ENSMUSG00000023826(Prkn),ENSMUSG00000052688(Rab7b),ENSMUSG00000022051(Bnip3l),ENSMUSG00000029512(Ulk1),ENSMUSG00000029592(Usp30)	http://www.kegg.jp/kegg-bin/show_pathway?map04137/K21343%09%23FFFFFF,red/K04448%09%23FFFFFF,green/K15465%09%23FFFFFF,green/K14381%09%23FFFFFF,red/K04440%09%23FFFFFF,red/K17987%09%23FFFFFF,green/K05688%09%23FFFFFF,green/K07830%09%23FFFFFF,red/K19945%09%23FFFFFF,green/K17454%09%23FFFFFF,green/K17907%09%23FFFFFF,red/K04735%09%23FFFFFF,red/K21361%09%23FFFFFF,red/K05410%09%23FFFFFF,red/K07898%09%23FFF…
mmu04623	Cytosolic DNA-sensing pathway	Organismal Systems	Immune system	23	5	28	63	0.000289888	0.00157439	ENSMUSG00000024927(Rela),ENSMUSG00000040296(Ddx58),ENSMUSG00000027398(Il1b),ENSMUSG00000027951(Adar),ENSMUSG00000025746(Il6),ENSMUSG00000032344(Cgas),ENSMUSG00000048806(Ifnb1),ENSMUSG00000037860(Aim2),ENSMUSG00000018930(Ccl4),ENSMUSG00000025498(Irf7),ENSMUSG00000021025(Nfkbia),ENSMUSG00000027514(Zbp1),ENSMUSG00000039217(Il18),ENSMUSG00000042349(Ikbke),ENSMUSG00000034855(Cxcl10),ENSMUSG00000030595…	ENSMUSG00000028104(Polr3gl),ENSMUSG00000004667(Polr2e),ENSMUSG00000022476(Polr3h),ENSMUSG00000037523(Mavs),ENSMUSG00000035834(Polr3g)	http://www.kegg.jp/kegg-bin/show_pathway?map04623/K12965%09%23FFFFFF,red/K12499%09%23FFFFFF,red/K05410%09%23FFFFFF,red/K01370%09%23FFFFFF,red/K03026%09%23FFFFFF,red/K12968%09%23FFFFFF,red/K04735%09%23FFFFFF,red/K12971%09%23FFFFFF,red/K03022%09%23FFFFFF,green/K12966%09%23FFFFFF,red/K05405%09%23FFFFFF,red/K17834%09%23FFFFFF,red/K09447%09%23FFFFFF,red/K12964%09%23FFFFFF,red/K07210%09%23FFFFFF,red/K1…
mmu04650	Natural killer cell mediated cytotoxicity	Organismal Systems	Immune system	41	9	50	133	0.000308234	0.00164566	ENSMUSG00000053835(H2-T24),ENSMUSG00000016206(H2-M3),ENSMUSG00000039304(Tnfsf10),ENSMUSG00000067212(H2-T23),ENSMUSG00000002413(Braf),ENSMUSG00000018916(Csf2),ENSMUSG00000000409(Lck),ENSMUSG00000061232(H2-K1),ENSMUSG00000052889(Prkcb),ENSMUSG00000015437(Gzmb),ENSMUSG00000058715(Fcer1g),ENSMUSG00000004936(Map2k1),ENSMUSG00000022971(Ifnar2),ENSMUSG00000037405(Icam1),ENSMUSG00000024401(Tnf),ENSMUSG00…	ENSMUSG00000027544(Nfatc2),ENSMUSG00000031834(Pik3r2),ENSMUSG00000009621(Vav2),ENSMUSG00000035109(Shc4),ENSMUSG00000079685(Ulbp1),ENSMUSG00000033016(Nfatc1),ENSMUSG00000026117(Zap70),ENSMUSG00000020312(Shc2),ENSMUSG00000016933(Plcg1)	http://www.kegg.jp/kegg-bin/show_pathway?map04650/K05427%09%23FFFFFF,red/K04726%09%23FFFFFF,red/K07360%09%23FFFFFF,green/K05856%09%23FFFFFF,red/K05730%09%23FFFFFF,green/K05415%09%23FFFFFF,red/K05718%09%23FFFFFF,red/K01353%09%23FFFFFF,red/K05697%09%23FFFFFF,red/K06728%09%23FFFFFF,red/K04365%09%23FFFFFF,red/K04721%09%23FFFFFF,red/K01116%09%23FFFFFF,green/K05130%09%23FFFFFF,red/K06490%09%23FFFFFF,re…
mmu05310	Asthma	Human Diseases	Immune diseases	13	1	14	24	0.000329806	0.00173148	ENSMUSG00000024334(H2-Oa),ENSMUSG00000017652(Cd40),ENSMUSG00000041538(H2-Ob),ENSMUSG00000037649(H2-DMa),ENSMUSG00000073421(H2-Ab1),ENSMUSG00000052234(Epx),ENSMUSG00000036594(H2-Aa),ENSMUSG00000016529(Il10),ENSMUSG00000024401(Tnf),ENSMUSG00000060586(H2-Eb1),ENSMUSG00000027073(Prg2),ENSMUSG00000079547(H2-DMb1),ENSMUSG00000058715(Fcer1g)	ENSMUSG00000000869(Il4)	http://www.kegg.jp/kegg-bin/show_pathway?map05310/K07983%09%23FFFFFF,red/K06752%09%23FFFFFF,red/K05430%09%23FFFFFF,green/K03160%09%23FFFFFF,red/K10786%09%23FFFFFF,red/K03156%09%23FFFFFF,red/K10788%09%23FFFFFF,red/K05443%09%23FFFFFF,red/
mmu00062	Fatty acid elongation	Metabolism	Lipid metabolism	8	9	17	32	0.000355083	0.00183363	ENSMUSG00000028937(Acot7),ENSMUSG00000035376(Hacd2),ENSMUSG00000021364(Elovl2),ENSMUSG00000038459(Abhd17c),ENSMUSG00000047368(Abhd17b),ENSMUSG00000027195(Hsd17b12),ENSMUSG00000015474(Ppt2),ENSMUSG00000028910(Mecr)	ENSMUSG00000027984(Hadh),ENSMUSG00000036880(Acaa2),ENSMUSG00000021226(Acot2),ENSMUSG00000028497(Hacd4),ENSMUSG00000025465(Echs1),ENSMUSG00000072949(Acot1),ENSMUSG00000032349(Elovl5),ENSMUSG00000003346(Abhd17a),ENSMUSG00000063275(Hacd1)	http://www.kegg.jp/kegg-bin/show_pathway?map00062/K07512%09%23FFFFFF,red/K10205%09%23FFFFFF,red/K01068%09%23FFFFFF,green/K00022%09%23FFFFFF,green/K01074%09%23FFFFFF,red/K10244%09%23FFFFFF,green/K17360%09%23FFFFFF,red/K01076%09%23FFFFFF,purple/K07511%09%23FFFFFF,green/K07508%09%23FFFFFF,green/K10251%09%23FFFFFF,red/K10703%09%23FFFFFF,purple/
mmu04622	RIG-I-like receptor signaling pathway	Organismal Systems	Immune system	26	4	30	70	0.000387352	0.001968	ENSMUSG00000030595(Nfkbib),ENSMUSG00000034855(Cxcl10),ENSMUSG00000004296(Il12b),ENSMUSG00000039285(Azi2),ENSMUSG00000024927(Rela),ENSMUSG00000053137(Mapk11),ENSMUSG00000040296(Ddx58),ENSMUSG00000035692(Isg15),ENSMUSG00000026029(Casp8),ENSMUSG00000048806(Ifnb1),ENSMUSG00000031154(Otud5),ENSMUSG00000064289(Tank),ENSMUSG00000004221(Ikbkg),ENSMUSG00000000275(Trim25),ENSMUSG00000021025(Nfkbia),ENSMUSG…	ENSMUSG00000031077(Fadd),ENSMUSG00000021754(Map3k1),ENSMUSG00000037523(Mavs),ENSMUSG00000032109(Nlrx1)	http://www.kegg.jp/kegg-bin/show_pathway?map04622/K12653%09%23FFFFFF,green/K02580%09%23FFFFFF,red/K04734%09%23FFFFFF,red/K03156%09%23FFFFFF,red/K12671%09%23FFFFFF,red/K12655%09%23FFFFFF,red/K09447%09%23FFFFFF,red/K05425%09%23FFFFFF,red/K12646%09%23FFFFFF,red/K07210%09%23FFFFFF,red/K10652%09%23FFFFFF,red/K12648%09%23FFFFFF,green/K12651%09%23FFFFFF,red/K04440%09%23FFFFFF,red/K05415%09%23FFFFFF,red/…
mmu04068	FoxO signaling pathway	Environmental Information Processing	Signal transduction	27	22	49	131	0.000403479	0.0020174	ENSMUSG00000000184(Ccnd2),ENSMUSG00000004040(Stat3),ENSMUSG00000021701(Plk2),ENSMUSG00000039936(Pik3cd),ENSMUSG00000041417(Pik3r1),ENSMUSG00000015312(Gadd45b),ENSMUSG00000078566(Bnip3),ENSMUSG00000025746(Il6),ENSMUSG00000020122(Egfr),ENSMUSG00000053137(Mapk11),ENSMUSG00000021936(Mapk8),ENSMUSG00000022710(Usp7),ENSMUSG00000073802(Cdkn2b),ENSMUSG00000024241(Sos1),ENSMUSG00000020184(Mdm2),ENSMUSG000…	ENSMUSG00000040618(Pck2),ENSMUSG00000028944(Prkag2),ENSMUSG00000055980(Irs1),ENSMUSG00000022358(Fbxo32),ENSMUSG00000045092(S1pr1),ENSMUSG00000037111(Setd7),ENSMUSG00000054115(Skp2),ENSMUSG00000022433(Csnk1e),ENSMUSG00000021253(Tgfb3),ENSMUSG00000028017(Egf),ENSMUSG00000021453(Gadd45g),ENSMUSG00000042903(Foxo4),ENSMUSG00000025358(Cdk2),ENSMUSG00000044167(Foxo1),ENSMUSG00000038894(Irs2),ENSMUSG0000…	http://www.kegg.jp/kegg-bin/show_pathway?map04068/K06625%09%23FFFFFF,red/K04365%09%23FFFFFF,red/K08862%09%23FFFFFF,red/K03099%09%23FFFFFF,red/K10146%09%23FFFFFF,red/K05072%09%23FFFFFF,green/K04402%09%23FFFFFF,purple/K08861%09%23FFFFFF,red/K04361%09%23FFFFFF,red/K01596%09%23FFFFFF,green/K07200%09%23FFFFFF,green/K12358%09%23FFFFFF,green/K11431%09%23FFFFFF,green/K08960%09%23FFFFFF,green/K02649%09%23…
mmu04218	Cellular senescence	Cellular Processes	Cell growth and death	37	24	61	172	0.000456583	0.00224724	ENSMUSG00000019842(Traf3ip2),ENSMUSG00000056116(H2-T22),ENSMUSG00000035929(H2-Q4),ENSMUSG00000020271(Fbxw11),ENSMUSG00000008892(Vdac3),ENSMUSG00000024927(Rela),ENSMUSG00000053137(Mapk11),ENSMUSG00000092243(Gm7030),ENSMUSG00000025746(Il6),ENSMUSG00000039936(Pik3cd),ENSMUSG00000015312(Gadd45b),ENSMUSG00000016283(H2-M2),ENSMUSG00000016528(Mapkapk2),ENSMUSG00000041417(Pik3r1),ENSMUSG00000015837(Sqstm…	ENSMUSG00000027490(E2f1),ENSMUSG00000033016(Nfatc1),ENSMUSG00000021453(Gadd45g),ENSMUSG00000021253(Tgfb3),ENSMUSG00000029521(Chek2),ENSMUSG00000020380(Rad50),ENSMUSG00000006728(Cdk4),ENSMUSG00000014158(Trpv4),ENSMUSG00000019942(Cdk1),ENSMUSG00000027544(Nfatc2),ENSMUSG00000070348(Ccnd1),ENSMUSG00000042644(Itpr3),ENSMUSG00000007613(Tgfbr1),ENSMUSG00000048756(Foxo3),ENSMUSG00000022105(Rb1),ENSMUSG00…	http://www.kegg.jp/kegg-bin/show_pathway?map04218/K06751%09%23FFFFFF,red/K04681%09%23FFFFFF,red/K02580%09%23FFFFFF,red/K17454%09%23FFFFFF,green/K04377%09%23FFFFFF,red/K04441%09%23FFFFFF,red/K04446%09%23FFFFFF,green/K04973%09%23FFFFFF,green/K18753%09%23FFFFFF,green/K04960%09%23FFFFFF,green/K06643%09%23FFFFFF,red/K00922%09%23FFFFFF,red/K04674%09%23FFFFFF,green/K02649%09%23FFFFFF,purple/K15041%09%23…
mmu04014	Ras signaling pathway	Environmental Information Processing	Signal transduction	47	31	78	231	0.00047234	0.00228903	ENSMUSG00000024620(Pdgfrb),ENSMUSG00000004451(Ralb),ENSMUSG00000020275(Rel),ENSMUSG00000042817(Flt3),ENSMUSG00000041417(Pik3r1),ENSMUSG00000031520(Vegfc),ENSMUSG00000022781(Pak2),ENSMUSG00000033220(Rac2),ENSMUSG00000039936(Pik3cd),ENSMUSG00000003070(Efna2),ENSMUSG00000032356(Rasgrf1),ENSMUSG00000017831(Rab5a),ENSMUSG00000020122(Egfr),ENSMUSG00000029064(Gnb1),ENSMUSG00000027347(Rasgrp1),ENSMUSG000…	ENSMUSG00000048240(Gng7),ENSMUSG00000016933(Plcg1),ENSMUSG00000028864(Hgf),ENSMUSG00000028019(Pdgfc),ENSMUSG00000005469(Prkaca),ENSMUSG00000031714(Gab1),ENSMUSG00000026117(Zap70),ENSMUSG00000032192(Gnb5),ENSMUSG00000020312(Shc2),ENSMUSG00000028017(Egf),ENSMUSG00000031465(Angpt2),ENSMUSG00000042903(Foxo4),ENSMUSG00000038607(Gng10),ENSMUSG00000071042(Rasgrp3),ENSMUSG00000052142(Rasal3),ENSMUSG00000…	http://www.kegg.jp/kegg-bin/show_pathway?map04014/K08015%09%23FFFFFF,green/K02649%09%23FFFFFF,purple/K16817%09%23FFFFFF,red/K07835%09%23FFFFFF,red/K03099%09%23FFFFFF,red/K07860%09%23FFFFFF,red/K07210%09%23FFFFFF,red/K19662%09%23FFFFFF,red/K04353%09%23FFFFFF,red/K04545%09%23FFFFFF,green/K17631%09%23FFFFFF,green/K06619%09%23FFFFFF,green/K05089%09%23FFFFFF,red/K04361%09%23FFFFFF,red/K17447%09%23FFFF…
mmu04110	Cell cycle	Cellular Processes	Cell growth and death	16	30	46	122	0.000487104	0.00232481	ENSMUSG00000016477(E2f3),ENSMUSG00000020849(Ywhae),ENSMUSG00000029910(Mad2l1),ENSMUSG00000040274(Cdk6),ENSMUSG00000022285(Ywhaz),ENSMUSG00000015312(Gadd45b),ENSMUSG00000027641(Rbl1),ENSMUSG00000073802(Cdkn2b),ENSMUSG00000020415(Pttg1),ENSMUSG00000000184(Ccnd2),ENSMUSG00000020184(Mdm2),ENSMUSG00000023067(Cdkn1a),ENSMUSG00000022346(Myc),ENSMUSG00000033502(Cdc14a),ENSMUSG00000028800(Hdac1),ENSMUSG00…	ENSMUSG00000026842(Abl1),ENSMUSG00000029521(Chek2),ENSMUSG00000054115(Skp2),ENSMUSG00000037664(Cdkn1c),ENSMUSG00000022672(Prkdc),ENSMUSG00000032411(Tfdp2),ENSMUSG00000024370(Cdc23),ENSMUSG00000025358(Cdk2),ENSMUSG00000002870(Mcm2),ENSMUSG00000040084(Bub1b),ENSMUSG00000006728(Cdk4),ENSMUSG00000028551(Cdkn2c),ENSMUSG00000027490(E2f1),ENSMUSG00000033102(Cdc14b),ENSMUSG00000070348(Ccnd1),ENSMUSG00000…	http://www.kegg.jp/kegg-bin/show_pathway?map04110/K02603%09%23FFFFFF,green/K04681%09%23FFFFFF,red/K06637%09%23FFFFFF,green/K06630%09%23FFFFFF,red/K06625%09%23FFFFFF,red/K06067%09%23FFFFFF,red/K02089%09%23FFFFFF,green/K06635%09%23FFFFFF,red/K06620%09%23FFFFFF,red/K06642%09%23FFFFFF,green/K06679%09%23FFFFFF,green/K03355%09%23FFFFFF,green/K02540%09%23FFFFFF,green/K04377%09%23FFFFFF,red/K04503%09%23F…
mmu01523	Antifolate resistance	Human Diseases	Drug resistance: Antineoplastic	10	6	16	30	0.000498899	0.00234557	ENSMUSG00000032849(Abcc4),ENSMUSG00000029009(Mthfr),ENSMUSG00000028163(Nfkb1),ENSMUSG00000024401(Tnf),ENSMUSG00000004221(Ikbkg),ENSMUSG00000025746(Il6),ENSMUSG00000027398(Il1b),ENSMUSG00000024927(Rela),ENSMUSG00000023088(Abcc1),ENSMUSG00000022822(Abcc5)	ENSMUSG00000009566(Fpgs),ENSMUSG00000001827(Folr1),ENSMUSG00000001436(Slc19a1),ENSMUSG00000020865(Abcc3),ENSMUSG00000021707(Dhfr),ENSMUSG00000020829(Slc46a1)	http://www.kegg.jp/kegg-bin/show_pathway?map01523/K05665%09%23FFFFFF,red/K05405%09%23FFFFFF,red/K05667%09%23FFFFFF,green/K05668%09%23FFFFFF,red/K04735%09%23FFFFFF,red/K07210%09%23FFFFFF,red/K00297%09%23FFFFFF,red/K13649%09%23FFFFFF,green/K00287%09%23FFFFFF,green/K14609%09%23FFFFFF,green/K03156%09%23FFFFFF,red/K04519%09%23FFFFFF,red/K02580%09%23FFFFFF,red/K01930%09%23FFFFFF,green/K14613%09%23FFFFF…
mmu05221	Acute myeloid leukemia	Human Diseases	Cancers: Specific types	24	5	29	68	0.000530927	0.00245944	ENSMUSG00000039936(Pik3cd),ENSMUSG00000015947(Fcgr1),ENSMUSG00000041417(Pik3r1),ENSMUSG00000042817(Flt3),ENSMUSG00000004040(Stat3),ENSMUSG00000030786(Itgam),ENSMUSG00000024927(Rela),ENSMUSG00000089929(Bcl2a1b),ENSMUSG00000004221(Ikbkg),ENSMUSG00000051439(Cd14),ENSMUSG00000028698(Pik3r3),ENSMUSG00000004043(Stat5a),ENSMUSG00000024241(Sos1),ENSMUSG00000024014(Pim1),ENSMUSG00000028163(Nfkb1),ENSMUSG0…	ENSMUSG00000019960(Dusp6),ENSMUSG00000066687(Zbtb16),ENSMUSG00000034957(Cebpa),ENSMUSG00000031834(Pik3r2),ENSMUSG00000070348(Ccnd1)	http://www.kegg.jp/kegg-bin/show_pathway?map05221/K04365%09%23FFFFFF,red/K11223%09%23FFFFFF,red/K02580%09%23FFFFFF,red/K05092%09%23FFFFFF,red/K10054%09%23FFFFFF,red/K10055%09%23FFFFFF,green/K02649%09%23FFFFFF,purple/K04503%09%23FFFFFF,green/K08806%09%23FFFFFF,red/K04735%09%23FFFFFF,red/K04377%09%23FFFFFF,red/K06498%09%23FFFFFF,red/K04368%09%23FFFFFF,red/K04692%09%23FFFFFF,red/K04391%09%23FFFFFF,r…
mmu05203	Viral carcinogenesis	Human Diseases	Cancers: Overview	55	19	74	218	0.000547113	0.00249769	ENSMUSG00000035448(Ccr3),ENSMUSG00000039936(Pik3cd),ENSMUSG00000002325(Irf9),ENSMUSG00000016528(Mapkapk2),ENSMUSG00000041417(Pik3r1),ENSMUSG00000004221(Ikbkg),ENSMUSG00000016283(H2-M2),ENSMUSG00000020275(Rel),ENSMUSG00000024436(Mrps18b),ENSMUSG00000024079(Eif2ak2),ENSMUSG00000040274(Cdk6),ENSMUSG00000028698(Pik3r3),ENSMUSG00000021025(Nfkbia),ENSMUSG00000027646(Src),ENSMUSG00000004040(Stat3),ENSMU…	ENSMUSG00000038648(Creb3l2),ENSMUSG00000021756(Il6st),ENSMUSG00000031161(Hdac6),ENSMUSG00000031834(Pik3r2),ENSMUSG00000054115(Skp2),ENSMUSG00000021639(Gtf2h2),ENSMUSG00000006728(Cdk4),ENSMUSG00000025358(Cdk2),ENSMUSG00000052684(Jun),ENSMUSG00000062906(Hdac10),ENSMUSG00000008855(Hdac5),ENSMUSG00000067567(Hdac8),ENSMUSG00000019942(Cdk1),ENSMUSG00000028238(Atp6v0d2),ENSMUSG00000070348(Ccnd1),ENSMUSG…	http://www.kegg.jp/kegg-bin/show_pathway?map05203/K09047%09%23FFFFFF,red/K11252%09%23FFFFFF,green/K02206%09%23FFFFFF,green/K15413%09%23FFFFFF,red/K16174%09%23FFFFFF,red/K06062%09%23FFFFFF,red/K00922%09%23FFFFFF,red/K04448%09%23FFFFFF,green/K03990%09%23FFFFFF,red/K05855%09%23FFFFFF,red/K03173%09%23FFFFFF,red/K04685%09%23FFFFFF,red/K05854%09%23FFFFFF,red/K04180%09%23FFFFFF,red/K11838%09%23FFFFFF,re…
mmu04012	ErbB signaling pathway	Environmental Information Processing	Signal transduction	25	9	34	84	0.000590279	0.00265626	ENSMUSG00000024241(Sos1),ENSMUSG00000029377(Ereg),ENSMUSG00000004043(Stat5a),ENSMUSG00000030602(Pak4),ENSMUSG00000021936(Mapk8),ENSMUSG00000033352(Map2k4),ENSMUSG00000041417(Pik3r1),ENSMUSG00000039936(Pik3cd),ENSMUSG00000022781(Pak2),ENSMUSG00000053819(Camk2d),ENSMUSG00000027646(Src),ENSMUSG00000028698(Pik3r3),ENSMUSG00000020122(Egfr),ENSMUSG00000032475(Nck1),ENSMUSG00000032311(Nrg4),ENSMUSG00000…	ENSMUSG00000016933(Plcg1),ENSMUSG00000052684(Jun),ENSMUSG00000035109(Shc4),ENSMUSG00000026842(Abl1),ENSMUSG00000021820(Camk2g),ENSMUSG00000031834(Pik3r2),ENSMUSG00000031714(Gab1),ENSMUSG00000028017(Egf),ENSMUSG00000020312(Shc2)	http://www.kegg.jp/kegg-bin/show_pathway?map04012/K04377%09%23FFFFFF,red/K05734%09%23FFFFFF,red/K04368%09%23FFFFFF,red/K00922%09%23FFFFFF,red/K05458%09%23FFFFFF,red/K11223%09%23FFFFFF,red/K07365%09%23FFFFFF,red/K04438%09%23FFFFFF,red/K17447%09%23FFFFFF,green/K02649%09%23FFFFFF,purple/K04440%09%23FFFFFF,red/K04410%09%23FFFFFF,red/K01116%09%23FFFFFF,green/K04365%09%23FFFFFF,red/K06625%09%23FFFFFF,r…
mmu04722	Neurotrophin signaling pathway	Organismal Systems	Nervous system	29	16	45	121	0.000783924	0.00347797	ENSMUSG00000041135(Ripk2),ENSMUSG00000005057(Sh2b2),ENSMUSG00000039936(Pik3cd),ENSMUSG00000016528(Mapkapk2),ENSMUSG00000041417(Pik3r1),ENSMUSG00000021025(Nfkbia),ENSMUSG00000017776(Crk),ENSMUSG00000024927(Rela),ENSMUSG00000053137(Mapk11),ENSMUSG00000020227(Irak3),ENSMUSG00000071369(Map3k5),ENSMUSG00000024241(Sos1),ENSMUSG00000021936(Mapk8),ENSMUSG00000028163(Nfkb1),ENSMUSG00000060477(Irak2),ENSMU…	ENSMUSG00000055980(Irs1),ENSMUSG00000016933(Plcg1),ENSMUSG00000031714(Gab1),ENSMUSG00000021754(Map3k1),ENSMUSG00000020312(Shc2),ENSMUSG00000046432(Bex3),ENSMUSG00000021514(Zfp369),ENSMUSG00000035109(Shc4),ENSMUSG00000052684(Jun),ENSMUSG00000068747(Sort1),ENSMUSG00000010609(Psen2),ENSMUSG00000031834(Pik3r2),ENSMUSG00000021820(Camk2g),ENSMUSG00000026842(Abl1),ENSMUSG00000048756(Foxo3),ENSMUSG000000…	http://www.kegg.jp/kegg-bin/show_pathway?map04722/K04365%09%23FFFFFF,red/K02580%09%23FFFFFF,red/K04353%09%23FFFFFF,red/K06068%09%23FFFFFF,red/K04734%09%23FFFFFF,red/K04515%09%23FFFFFF,purple/K04426%09%23FFFFFF,red/K06619%09%23FFFFFF,green/K04440%09%23FFFFFF,red/K07836%09%23FFFFFF,red/K09593%09%23FFFFFF,green/K16172%09%23FFFFFF,green/K05872%09%23FFFFFF,red/K04731%09%23FFFFFF,red/K04441%09%23FFFFFF…
mmu05143	African trypanosomiasis	Human Diseases	Infectious diseases: Parasitic	16	1	17	34	0.000886021	0.00387634	ENSMUSG00000031549(Ido2),ENSMUSG00000027398(Il1b),ENSMUSG00000052889(Prkcb),ENSMUSG00000004296(Il12b),ENSMUSG00000024778(Fas),ENSMUSG00000024960(Plcb3),ENSMUSG00000025746(Il6),ENSMUSG00000024639(Gnaq),ENSMUSG00000024401(Tnf),ENSMUSG00000026582(Sele),ENSMUSG00000016529(Il10),ENSMUSG00000032508(Myd88),ENSMUSG00000027962(Vcam1),ENSMUSG00000037405(Icam1),ENSMUSG00000039217(Il18),ENSMUSG00000027776(Il…	ENSMUSG00000040061(Plcb2)	http://www.kegg.jp/kegg-bin/show_pathway?map05143/K04729%09%23FFFFFF,red/K05482%09%23FFFFFF,red/K05425%09%23FFFFFF,red/K04519%09%23FFFFFF,red/K06527%09%23FFFFFF,red/K00463%09%23FFFFFF,red/K05858%09%23FFFFFF,purple/K04390%09%23FFFFFF,red/K19662%09%23FFFFFF,red/K06494%09%23FFFFFF,red/K05406%09%23FFFFFF,red/K03156%09%23FFFFFF,red/K05443%09%23FFFFFF,red/K04634%09%23FFFFFF,red/K06490%09%23FFFFFF,red/K…
mmu04611	Platelet activation	Organismal Systems	Immune system	33	12	45	122	0.00095739	0.00413121	ENSMUSG00000024960(Plcb3),ENSMUSG00000030403(Vasp),ENSMUSG00000024290(Rock1),ENSMUSG00000029580(Actb),ENSMUSG00000033847(Pla2g4c),ENSMUSG00000024639(Gnaq),ENSMUSG00000058715(Fcer1g),ENSMUSG00000052681(Rap1b),ENSMUSG00000020580(Rock2),ENSMUSG00000020573(Pik3cg),ENSMUSG00000025809(Itgb1),ENSMUSG00000068798(Rap1a),ENSMUSG00000028698(Pik3r3),ENSMUSG00000027646(Src),ENSMUSG00000056220(Pla2g4a),ENSMUSG…	ENSMUSG00000042644(Itpr3),ENSMUSG00000020654(Adcy3),ENSMUSG00000034868(Myl12b),ENSMUSG00000027765(P2ry1),ENSMUSG00000040061(Plcb2),ENSMUSG00000031834(Pik3r2),ENSMUSG00000001930(Vwf),ENSMUSG00000005580(Adcy9),ENSMUSG00000005469(Prkaca),ENSMUSG00000031659(Adcy7),ENSMUSG00000047250(Ptgs1),ENSMUSG00000020689(Itgb3)	http://www.kegg.jp/kegg-bin/show_pathway?map04611/K05732%09%23FFFFFF,red/K08047%09%23FFFFFF,green/K08049%09%23FFFFFF,green/K05854%09%23FFFFFF,red/K04263%09%23FFFFFF,red/K06274%09%23FFFFFF,red/K06270%09%23FFFFFF,red/K17388%09%23FFFFFF,red/K03900%09%23FFFFFF,green/K06493%09%23FFFFFF,green/K04960%09%23FFFFFF,green/K04270%09%23FFFFFF,green/K21289%09%23FFFFFF,red/K03914%09%23FFFFFF,red/K05855%09%23FFF…
mmu04151	PI3K-Akt signaling pathway	Environmental Information Processing	Signal transduction	77	34	111	355	0.000980286	0.00417284	ENSMUSG00000048376(F2r),ENSMUSG00000028859(Csf3r),ENSMUSG00000024241(Sos1),ENSMUSG00000020184(Mdm2),ENSMUSG00000028163(Nfkb1),ENSMUSG00000021270(Hsp90aa1),ENSMUSG00000031304(Il2rg),ENSMUSG00000009376(Met),ENSMUSG00000025809(Itgb1),ENSMUSG00000023034(Nr4a1),ENSMUSG00000042284(Itga1),ENSMUSG00000022971(Ifnar2),ENSMUSG00000004221(Ikbkg),ENSMUSG00000028698(Pik3r3),ENSMUSG00000026626(Ppp2r5a),ENSMUSG0…	ENSMUSG00000000869(Il4),ENSMUSG00000001930(Vwf),ENSMUSG00000025358(Cdk2),ENSMUSG00000043004(Gng2),ENSMUSG00000022817(Itgb5),ENSMUSG00000024962(Vegfb),ENSMUSG00000015846(Rxra),ENSMUSG00000038648(Creb3l2),ENSMUSG00000003882(Il7r),ENSMUSG00000031834(Pik3r2),ENSMUSG00000028914(Casp9),ENSMUSG00000031565(Fgfr1),ENSMUSG00000048756(Foxo3),ENSMUSG00000027111(Itga6),ENSMUSG00000005534(Insr),ENSMUSG00000025…	http://www.kegg.jp/kegg-bin/show_pathway?map04151/K08131%09%23FFFFFF,red/K07210%09%23FFFFFF,red/K02089%09%23FFFFFF,green/K05431%09%23FFFFFF,red/K06484%09%23FFFFFF,red/K12230%09%23FFFFFF,red/K05405%09%23FFFFFF,red/K06630%09%23FFFFFF,red/K04291%09%23FFFFFF,red/K00922%09%23FFFFFF,red/K13304%09%23FFFFFF,red/K06240%09%23FFFFFF,green/K04735%09%23FFFFFF,red/K02649%09%23FFFFFF,purple/K05453%09%23FFFFFF,r…
mmu05150	Staphylococcus aureus infection	Human Diseases	Infectious diseases: Bacterial	24	0	24	55	0.00105733	0.00444079	ENSMUSG00000036905(C1qb),ENSMUSG00000036887(C1qa),ENSMUSG00000090231(Cfb),ENSMUSG00000024164(C3),ENSMUSG00000030786(Itgam),ENSMUSG00000052270(Fpr2),ENSMUSG00000036594(H2-Aa),ENSMUSG00000015947(Fcgr1),ENSMUSG00000024334(H2-Oa),ENSMUSG00000041538(H2-Ob),ENSMUSG00000059089(Fcgr4),ENSMUSG00000045551(Fpr1),ENSMUSG00000026656(Fcgr2b),ENSMUSG00000037649(H2-DMa),ENSMUSG00000030830(Itgal),ENSMUSG000000734…	-	http://www.kegg.jp/kegg-bin/show_pathway?map05150/K04172%09%23FFFFFF,red/K06490%09%23FFFFFF,red/K01330%09%23FFFFFF,red/K03986%09%23FFFFFF,red/K06463%09%23FFFFFF,red/K12560%09%23FFFFFF,red/K01335%09%23FFFFFF,red/K06461%09%23FFFFFF,red/K04173%09%23FFFFFF,red/K04010%09%23FFFFFF,red/K06752%09%23FFFFFF,red/K03987%09%23FFFFFF,red/K05443%09%23FFFFFF,red/K06498%09%23FFFFFF,red/K03990%09%23FFFFFF,red/K013…
mmu01522	Endocrine resistance	Human Diseases	Drug resistance: Antineoplastic	21	15	36	93	0.00110101	0.00456338	ENSMUSG00000004936(Map2k1),ENSMUSG00000023067(Cdkn1a),ENSMUSG00000002413(Braf),ENSMUSG00000014773(Dll1),ENSMUSG00000024241(Sos1),ENSMUSG00000020184(Mdm2),ENSMUSG00000021936(Mapk8),ENSMUSG00000017737(Mmp9),ENSMUSG00000027646(Src),ENSMUSG00000028698(Pik3r3),ENSMUSG00000016477(E2f3),ENSMUSG00000020122(Egfr),ENSMUSG00000027276(Jag1),ENSMUSG00000027878(Notch2),ENSMUSG00000018160(Med1),ENSMUSG000000317…	ENSMUSG00000018983(E2f2),ENSMUSG00000022105(Rb1),ENSMUSG00000020654(Adcy3),ENSMUSG00000021250(Fos),ENSMUSG00000070348(Ccnd1),ENSMUSG00000028551(Cdkn2c),ENSMUSG00000035109(Shc4),ENSMUSG00000052684(Jun),ENSMUSG00000031834(Pik3r2),ENSMUSG00000005469(Prkaca),ENSMUSG00000031659(Adcy7),ENSMUSG00000020312(Shc2),ENSMUSG00000027490(E2f1),ENSMUSG00000005580(Adcy9),ENSMUSG00000006728(Cdk4)	http://www.kegg.jp/kegg-bin/show_pathway?map01522/K03099%09%23FFFFFF,red/K04361%09%23FFFFFF,red/K04441%09%23FFFFFF,red/K08049%09%23FFFFFF,green/K08523%09%23FFFFFF,red/K01398%09%23FFFFFF,red/K17454%09%23FFFFFF,green/K02089%09%23FFFFFF,green/K20994%09%23FFFFFF,red/K06052%09%23FFFFFF,red/K01403%09%23FFFFFF,red/K17447%09%23FFFFFF,green/K04368%09%23FFFFFF,red/K04448%09%23FFFFFF,green/K04379%09%23FFFFF…
mmu03410	Base excision repair	Genetic Information Processing	Replication and repair	2	14	16	32	0.00125023	0.00511457	ENSMUSG00000034674(Tdg),ENSMUSG00000054509(Parp4)	ENSMUSG00000030271(Ogg1),ENSMUSG00000035960(Apex1),ENSMUSG00000030322(Mbd4),ENSMUSG00000020287(Mpg),ENSMUSG00000038644(Pold1),ENSMUSG00000025218(Poll),ENSMUSG00000039396(Neil3),ENSMUSG00000032298(Neil1),ENSMUSG00000007080(Pole),ENSMUSG00000056394(Lig1),ENSMUSG00000035121(Neil2),ENSMUSG00000029591(Ung),ENSMUSG00000051768(Xrcc1),ENSMUSG00000020974(Pole2)	http://www.kegg.jp/kegg-bin/show_pathway?map03410/K10771%09%23FFFFFF,green/K10568%09%23FFFFFF,green/K03512%09%23FFFFFF,green/K03660%09%23FFFFFF,green/K10567%09%23FFFFFF,green/K10801%09%23FFFFFF,green/K02324%09%23FFFFFF,green/K02327%09%23FFFFFF,green/K10803%09%23FFFFFF,green/K02325%09%23FFFFFF,green/K10569%09%23FFFFFF,green/K03648%09%23FFFFFF,green/K10747%09%23FFFFFF,green/K20813%09%23FFFFFF,red/K…
mmu05211	Renal cell carcinoma	Human Diseases	Cancers: Specific types	21	7	28	68	0.00127158	0.00513523	ENSMUSG00000043733(Ptpn11),ENSMUSG00000028698(Pik3r3),ENSMUSG00000068798(Rap1a),ENSMUSG00000024241(Sos1),ENSMUSG00000030602(Pak4),ENSMUSG00000009376(Met),ENSMUSG00000006134(Crkl),ENSMUSG00000023067(Cdkn1a),ENSMUSG00000028645(Slc2a1),ENSMUSG00000002413(Braf),ENSMUSG00000004936(Map2k1),ENSMUSG00000052681(Rap1b),ENSMUSG00000021109(Hif1a),ENSMUSG00000022781(Pak2),ENSMUSG00000039936(Pik3cd),ENSMUSG000…	ENSMUSG00000031834(Pik3r2),ENSMUSG00000052684(Jun),ENSMUSG00000024140(Epas1),ENSMUSG00000028864(Hgf),ENSMUSG00000032633(Flcn),ENSMUSG00000031714(Gab1),ENSMUSG00000021253(Tgfb3)	http://www.kegg.jp/kegg-bin/show_pathway?map05211/K04438%09%23FFFFFF,red/K09095%09%23FFFFFF,green/K04448%09%23FFFFFF,green/K07299%09%23FFFFFF,red/K04353%09%23FFFFFF,red/K13377%09%23FFFFFF,green/K04368%09%23FFFFFF,red/K02649%09%23FFFFFF,purple/K06625%09%23FFFFFF,red/K05734%09%23FFFFFF,red/K04410%09%23FFFFFF,red/K03872%09%23FFFFFF,red/K07293%09%23FFFFFF,red/K05460%09%23FFFFFF,green/K09594%09%23FFFF…
mmu04510	Focal adhesion	Cellular Processes	Cellular community - eukaryotes	48	18	66	197	0.0015437	0.00615526	ENSMUSG00000052889(Prkcb),ENSMUSG00000002413(Braf),ENSMUSG00000029580(Actb),ENSMUSG00000006134(Crkl),ENSMUSG00000027009(Itga4),ENSMUSG00000025321(Itgb8),ENSMUSG00000030403(Vasp),ENSMUSG00000024290(Rock1),ENSMUSG00000020580(Rock2),ENSMUSG00000021702(Thbs4),ENSMUSG00000057367(Birc2),ENSMUSG00000004936(Map2k1),ENSMUSG00000052681(Rap1b),ENSMUSG00000029860(Zyx),ENSMUSG00000028698(Pik3r3),ENSMUSG000000…	ENSMUSG00000070348(Ccnd1),ENSMUSG00000025856(Pdgfa),ENSMUSG00000034868(Myl12b),ENSMUSG00000027111(Itga6),ENSMUSG00000031834(Pik3r2),ENSMUSG00000024962(Vegfb),ENSMUSG00000022817(Itgb5),ENSMUSG00000035109(Shc4),ENSMUSG00000052684(Jun),ENSMUSG00000009621(Vav2),ENSMUSG00000001930(Vwf),ENSMUSG00000035133(Arhgap5),ENSMUSG00000020312(Shc2),ENSMUSG00000028017(Egf),ENSMUSG00000028019(Pdgfc),ENSMUSG0000002…	http://www.kegg.jp/kegg-bin/show_pathway?map04510/K05700%09%23FFFFFF,red/K07860%09%23FFFFFF,red/K06493%09%23FFFFFF,green/K06588%09%23FFFFFF,green/K12757%09%23FFFFFF,green/K04349%09%23FFFFFF,red/K06273%09%23FFFFFF,red/K05730%09%23FFFFFF,green/K06483%09%23FFFFFF,red/K07836%09%23FFFFFF,red/K05449%09%23FFFFFF,red/K06269%09%23FFFFFF,red/K16858%09%23FFFFFF,green/K17449%09%23FFFFFF,green/K03900%09%23FFF…
mmu05218	Melanoma	Human Diseases	Cancers: Specific types	15	14	29	72	0.00158417	0.00623767	ENSMUSG00000020122(Egfr),ENSMUSG00000039936(Pik3cd),ENSMUSG00000015312(Gadd45b),ENSMUSG00000041417(Pik3r1),ENSMUSG00000035158(Mitf),ENSMUSG00000024620(Pdgfrb),ENSMUSG00000023067(Cdkn1a),ENSMUSG00000002413(Braf),ENSMUSG00000057789(Bak1),ENSMUSG00000004936(Map2k1),ENSMUSG00000040274(Cdk6),ENSMUSG00000028698(Pik3r3),ENSMUSG00000016477(E2f3),ENSMUSG00000020184(Mdm2),ENSMUSG00000009376(Met)	ENSMUSG00000027490(E2f1),ENSMUSG00000002109(Ddb2),ENSMUSG00000021453(Gadd45g),ENSMUSG00000028017(Egf),ENSMUSG00000028019(Pdgfc),ENSMUSG00000028864(Hgf),ENSMUSG00000006728(Cdk4),ENSMUSG00000025856(Pdgfa),ENSMUSG00000070348(Ccnd1),ENSMUSG00000022105(Rb1),ENSMUSG00000031565(Fgfr1),ENSMUSG00000018983(E2f2),ENSMUSG00000031834(Pik3r2),ENSMUSG00000021668(Polk)	http://www.kegg.jp/kegg-bin/show_pathway?map05218/K02091%09%23FFFFFF,red/K06618%09%23FFFFFF,green/K02649%09%23FFFFFF,purple/K05450%09%23FFFFFF,green/K09455%09%23FFFFFF,red/K04503%09%23FFFFFF,green/K14021%09%23FFFFFF,red/K00922%09%23FFFFFF,red/K04402%09%23FFFFFF,purple/K06643%09%23FFFFFF,red/K05099%09%23FFFFFF,red/K03511%09%23FFFFFF,green/K04362%09%23FFFFFF,green/K04368%09%23FFFFFF,red/K09389%09%2…
mmu04640	Hematopoietic cell lineage	Organismal Systems	Immune system	29	6	35	92	0.00182293	0.00708918	ENSMUSG00000036594(H2-Aa),ENSMUSG00000005087(Cd44),ENSMUSG00000025746(Il6),ENSMUSG00000030748(Il4ra),ENSMUSG00000026399(Cd55),ENSMUSG00000079547(H2-DMb1),ENSMUSG00000018916(Csf2),ENSMUSG00000030786(Itgam),ENSMUSG00000038067(Csf3),ENSMUSG00000027399(Il1a),ENSMUSG00000027398(Il1b),ENSMUSG00000000555(Itga5),ENSMUSG00000027009(Itga4),ENSMUSG00000014599(Csf1),ENSMUSG00000073421(H2-Ab1),ENSMUSG00000060…	ENSMUSG00000027111(Itga6),ENSMUSG00000027947(Il6ra),ENSMUSG00000006235(Epor),ENSMUSG00000000869(Il4),ENSMUSG00000020689(Itgb3),ENSMUSG00000003882(Il7r)	http://www.kegg.jp/kegg-bin/show_pathway?map04640/K06752%09%23FFFFFF,red/K06473%09%23FFFFFF,red/K05079%09%23FFFFFF,green/K06484%09%23FFFFFF,red/K04519%09%23FFFFFF,red/K05072%09%23FFFFFF,green/K05453%09%23FFFFFF,red/K06483%09%23FFFFFF,red/K06498%09%23FFFFFF,red/K01242%09%23FFFFFF,red/K03156%09%23FFFFFF,red/K06485%09%23FFFFFF,green/K05430%09%23FFFFFF,green/K06256%09%23FFFFFF,red/K06480%09%23FFFFFF,…
mmu04926	Relaxin signaling pathway	Organismal Systems	Endocrine system	27	19	46	129	0.00189494	0.00727935	ENSMUSG00000031503(Col4a2),ENSMUSG00000000001(Gnai3),ENSMUSG00000041417(Pik3r1),ENSMUSG00000050578(Mmp13),ENSMUSG00000039936(Pik3cd),ENSMUSG00000031520(Vegfc),ENSMUSG00000021025(Nfkbia),ENSMUSG00000020122(Egfr),ENSMUSG00000053007(Creb5),ENSMUSG00000029064(Gnb1),ENSMUSG00000031740(Mmp2),ENSMUSG00000020826(Nos2),ENSMUSG00000053137(Mapk11),ENSMUSG00000024927(Rela),ENSMUSG00000027669(Gnb4),ENSMUSG000…	ENSMUSG00000048240(Gng7),ENSMUSG00000005469(Prkaca),ENSMUSG00000031659(Adcy7),ENSMUSG00000032192(Gnb5),ENSMUSG00000020312(Shc2),ENSMUSG00000038607(Gng10),ENSMUSG00000018909(Arrb1),ENSMUSG00000005580(Adcy9),ENSMUSG00000043004(Gng2),ENSMUSG00000052684(Jun),ENSMUSG00000035109(Shc4),ENSMUSG00000038648(Creb3l2),ENSMUSG00000024962(Vegfb),ENSMUSG00000040061(Plcb2),ENSMUSG00000031834(Pik3r2),ENSMUSG00000…	http://www.kegg.jp/kegg-bin/show_pathway?map04926/K06237%09%23FFFFFF,red/K08049%09%23FFFFFF,green/K04448%09%23FFFFFF,green/K04439%09%23FFFFFF,green/K01403%09%23FFFFFF,red/K16366%09%23FFFFFF,red/K04539%09%23FFFFFF,green/K04388%09%23FFFFFF,green/K04674%09%23FFFFFF,green/K04536%09%23FFFFFF,red/K17447%09%23FFFFFF,green/K05704%09%23FFFFFF,red/K04430%09%23FFFFFF,red/K04345%09%23FFFFFF,green/K04545%09%2…
mmu05205	Proteoglycans in cancer	Human Diseases	Cancers: Overview	50	15	65	195	0.00192019	0.00728745	ENSMUSG00000005087(Cd44),ENSMUSG00000020580(Rock2),ENSMUSG00000020719(Ddx5),ENSMUSG00000007655(Cav1),ENSMUSG00000034220(Gpc1),ENSMUSG00000022831(Hcls1),ENSMUSG00000045005(Fzd5),ENSMUSG00000020122(Egfr),ENSMUSG00000004936(Map2k1),ENSMUSG00000002413(Braf),ENSMUSG00000055723(Rras2),ENSMUSG00000053137(Mapk11),ENSMUSG00000004296(Il12b),ENSMUSG00000024486(Hbegf),ENSMUSG00000040152(Thbs1),ENSMUSG0000005…	ENSMUSG00000024975(Pdcd4),ENSMUSG00000031565(Fgfr1),ENSMUSG00000031714(Gab1),ENSMUSG00000005469(Prkaca),ENSMUSG00000042644(Itpr3),ENSMUSG00000070348(Ccnd1),ENSMUSG00000005718(Tfap4),ENSMUSG00000022516(Nudt16l1),ENSMUSG00000016933(Plcg1),ENSMUSG00000020689(Itgb3),ENSMUSG00000028864(Hgf),ENSMUSG00000031834(Pik3r2),ENSMUSG00000021820(Camk2g),ENSMUSG00000001761(Smo),ENSMUSG00000022817(Itgb5)	http://www.kegg.jp/kegg-bin/show_pathway?map05205/K04437%09%23FFFFFF,red/K04503%09%23FFFFFF,green/K06256%09%23FFFFFF,red/K08268%09%23FFFFFF,red/K01403%09%23FFFFFF,red/K07293%09%23FFFFFF,red/K04515%09%23FFFFFF,purple/K05704%09%23FFFFFF,red/K06106%09%23FFFFFF,red/K05692%09%23FFFFFF,red/K06588%09%23FFFFFF,green/K05763%09%23FFFFFF,red/K10159%09%23FFFFFF,red/K06493%09%23FFFFFF,green/K04441%09%23FFFFFF…
mmu04072	Phospholipase D signaling pathway	Environmental Information Processing	Signal transduction	31	19	50	143	0.00200364	0.00751367	ENSMUSG00000033847(Pla2g4c),ENSMUSG00000055723(Rras2),ENSMUSG00000026821(Ralgds),ENSMUSG00000024960(Plcb3),ENSMUSG00000031861(Lpar2),ENSMUSG00000020573(Pik3cg),ENSMUSG00000004936(Map2k1),ENSMUSG00000058715(Fcer1g),ENSMUSG00000028698(Pik3r3),ENSMUSG00000043733(Ptpn11),ENSMUSG00000028126(Pip5k1a),ENSMUSG00000003269(Cyth2),ENSMUSG00000034731(Dgkh),ENSMUSG00000023827(Agpat4),ENSMUSG00000056220(Pla2g4…	ENSMUSG00000022861(Dgkg),ENSMUSG00000025856(Pdgfa),ENSMUSG00000020654(Adcy3),ENSMUSG00000005534(Insr),ENSMUSG00000000149(Gna12),ENSMUSG00000040479(Dgkz),ENSMUSG00000031834(Pik3r2),ENSMUSG00000040061(Plcb2),ENSMUSG00000035109(Shc4),ENSMUSG00000005580(Adcy9),ENSMUSG00000028017(Egf),ENSMUSG00000020312(Shc2),ENSMUSG00000031714(Gab1),ENSMUSG00000022469(Rapgef3),ENSMUSG00000031659(Adcy7),ENSMUSG0000002…	http://www.kegg.jp/kegg-bin/show_pathway?map04072/K04289%09%23FFFFFF,red/K21289%09%23FFFFFF,red/K03914%09%23FFFFFF,red/K21290%09%23FFFFFF,red/K04273%09%23FFFFFF,green/K04275%09%23FFFFFF,red/K00922%09%23FFFFFF,red/K01116%09%23FFFFFF,green/K00901%09%23FFFFFF,purple/K07208%09%23FFFFFF,red/K13523%09%23FFFFFF,red/K04346%09%23FFFFFF,green/K16342%09%23FFFFFF,red/K00889%09%23FFFFFF,red/K08014%09%23FFFFFF…
mmu01524	Platinum drug resistance	Human Diseases	Drug resistance: Antineoplastic	16	14	30	77	0.00244931	0.00907687	ENSMUSG00000032000(Birc3),ENSMUSG00000024778(Fas),ENSMUSG00000039936(Pik3cd),ENSMUSG00000063694(Cycs),ENSMUSG00000004446(Bid),ENSMUSG00000041417(Pik3r1),ENSMUSG00000019979(Apaf1),ENSMUSG00000026029(Casp8),ENSMUSG00000057367(Birc2),ENSMUSG00000066150(Slc31a1),ENSMUSG00000023067(Cdkn1a),ENSMUSG00000057789(Bak1),ENSMUSG00000001663(Gstt1),ENSMUSG00000020184(Mdm2),ENSMUSG00000071369(Map3k5),ENSMUSG000…	ENSMUSG00000031077(Fadd),ENSMUSG00000033318(Gstt2),ENSMUSG00000017146(Brca1),ENSMUSG00000032498(Mlh1),ENSMUSG00000002083(Bbc3),ENSMUSG00000005370(Msh6),ENSMUSG00000028914(Casp9),ENSMUSG00000017716(Birc5),ENSMUSG00000004032(Gstm5),ENSMUSG00000024151(Msh2),ENSMUSG00000019841(Rev3l),ENSMUSG00000001665(Gstt3),ENSMUSG00000028329(Xpa),ENSMUSG00000031834(Pik3r2)	http://www.kegg.jp/kegg-bin/show_pathway?map01524/K06643%09%23FFFFFF,red/K04390%09%23FFFFFF,red/K08734%09%23FFFFFF,green/K10605%09%23FFFFFF,green/K04399%09%23FFFFFF,green/K08737%09%23FFFFFF,green/K08735%09%23FFFFFF,green/K02084%09%23FFFFFF,red/K00922%09%23FFFFFF,red/K02373%09%23FFFFFF,green/K10132%09%23FFFFFF,green/K04726%09%23FFFFFF,red/K14686%09%23FFFFFF,red/K00799%09%23FFFFFF,purple/K02649%09%…
mmu04917	Prolactin signaling pathway	Organismal Systems	Endocrine system	21	8	29	74	0.0025891	0.00947842	ENSMUSG00000018899(Irf1),ENSMUSG00000053113(Socs3),ENSMUSG00000000184(Ccnd2),ENSMUSG00000041417(Pik3r1),ENSMUSG00000039936(Pik3cd),ENSMUSG00000004040(Stat3),ENSMUSG00000024789(Jak2),ENSMUSG00000038485(Socs7),ENSMUSG00000032578(Cish),ENSMUSG00000053137(Mapk11),ENSMUSG00000024927(Rela),ENSMUSG00000026321(Tnfrsf11a),ENSMUSG00000024241(Sos1),ENSMUSG00000004043(Stat5a),ENSMUSG00000028163(Nfkb1),ENSMUS…	ENSMUSG00000020027(Socs2),ENSMUSG00000020312(Shc2),ENSMUSG00000056153(Socs6),ENSMUSG00000035109(Shc4),ENSMUSG00000031834(Pik3r2),ENSMUSG00000048756(Foxo3),ENSMUSG00000021250(Fos),ENSMUSG00000070348(Ccnd1)	http://www.kegg.jp/kegg-bin/show_pathway?map04917/K05147%09%23FFFFFF,red/K04696%09%23FFFFFF,red/K17449%09%23FFFFFF,green/K04692%09%23FFFFFF,red/K11220%09%23FFFFFF,red/K04503%09%23FFFFFF,green/K05704%09%23FFFFFF,red/K00922%09%23FFFFFF,red/K09444%09%23FFFFFF,red/K02649%09%23FFFFFF,purple/K02580%09%23FFFFFF,red/K11223%09%23FFFFFF,red/K04735%09%23FFFFFF,red/K04447%09%23FFFFFF,red/K04440%09%23FFFFFF,r…
mmu04145	Phagosome	Cellular Processes	Transport and catabolism	50	7	57	169	0.00261785	0.00947842	ENSMUSG00000030162(Olr1),ENSMUSG00000059089(Fcgr4),ENSMUSG00000037649(H2-DMa),ENSMUSG00000026656(Fcgr2b),ENSMUSG00000045136(Tubb2b),ENSMUSG00000073421(H2-Ab1),ENSMUSG00000062591(Tubb4a),ENSMUSG00000060586(H2-Eb1),ENSMUSG00000019210(Atp6v1e1),ENSMUSG00000055172(C1ra),ENSMUSG00000030707(Coro1a),ENSMUSG00000037321(Tap1),ENSMUSG00000024339(Tap2),ENSMUSG00000001473(Tubb6),ENSMUSG00000025809(Itgb1),ENS…	ENSMUSG00000037936(Scarb1),ENSMUSG00000052688(Rab7b),ENSMUSG00000020689(Itgb3),ENSMUSG00000022817(Itgb5),ENSMUSG00000019302(Atp6v0a1),ENSMUSG00000036103(Colec12),ENSMUSG00000028238(Atp6v0d2)	http://www.kegg.jp/kegg-bin/show_pathway?map04145/K12560%09%23FFFFFF,red/K06558%09%23FFFFFF,red/K06588%09%23FFFFFF,green/K06498%09%23FFFFFF,red/K08012%09%23FFFFFF,red/K12478%09%23FFFFFF,red/K08763%09%23FFFFFF,red/K05653%09%23FFFFFF,red/K13884%09%23FFFFFF,red/K06752%09%23FFFFFF,red/K07898%09%23FFFFFF,green/K10169%09%23FFFFFF,red/K02154%09%23FFFFFF,green/K10159%09%23FFFFFF,red/K05719%09%23FFFFFF,re…
mmu04215	Apoptosis - multiple species	Cellular Processes	Cell growth and death	10	5	15	32	0.00392441	0.0140476	ENSMUSG00000057367(Birc2),ENSMUSG00000026029(Casp8),ENSMUSG00000025076(Casp7),ENSMUSG00000057789(Bak1),ENSMUSG00000032000(Birc3),ENSMUSG00000021936(Mapk8),ENSMUSG00000030341(Tnfrsf1a),ENSMUSG00000019979(Apaf1),ENSMUSG00000004446(Bid),ENSMUSG00000063694(Cycs)	ENSMUSG00000031077(Fadd),ENSMUSG00000028914(Casp9),ENSMUSG00000002083(Bbc3),ENSMUSG00000017716(Birc5),ENSMUSG00000068329(Htra2)	http://www.kegg.jp/kegg-bin/show_pathway?map04215/K08669%09%23FFFFFF,green/K04440%09%23FFFFFF,red/K04399%09%23FFFFFF,green/K14021%09%23FFFFFF,red/K08731%09%23FFFFFF,green/K08738%09%23FFFFFF,red/K04398%09%23FFFFFF,red/K16060%09%23FFFFFF,red/K04726%09%23FFFFFF,red/K02373%09%23FFFFFF,green/K02084%09%23FFFFFF,red/K10132%09%23FFFFFF,green/K03158%09%23FFFFFF,red/K04397%09%23FFFFFF,red/
mmu05219	Bladder cancer	Human Diseases	Cancers: Specific types	12	6	18	41	0.00399094	0.0141252	ENSMUSG00000020122(Egfr),ENSMUSG00000024486(Hbegf),ENSMUSG00000040152(Thbs1),ENSMUSG00000031740(Mmp2),ENSMUSG00000020184(Mdm2),ENSMUSG00000027646(Src),ENSMUSG00000016477(E2f3),ENSMUSG00000017737(Mmp9),ENSMUSG00000004936(Map2k1),ENSMUSG00000002413(Braf),ENSMUSG00000022346(Myc),ENSMUSG00000023067(Cdkn1a)	ENSMUSG00000006728(Cdk4),ENSMUSG00000028017(Egf),ENSMUSG00000027490(E2f1),ENSMUSG00000022105(Rb1),ENSMUSG00000018983(E2f2),ENSMUSG00000070348(Ccnd1)	http://www.kegg.jp/kegg-bin/show_pathway?map05219/K06625%09%23FFFFFF,red/K04377%09%23FFFFFF,red/K01398%09%23FFFFFF,red/K16857%09%23FFFFFF,red/K04357%09%23FFFFFF,green/K17454%09%23FFFFFF,green/K06618%09%23FFFFFF,green/K06620%09%23FFFFFF,red/K09389%09%23FFFFFF,green/K04361%09%23FFFFFF,red/K05704%09%23FFFFFF,red/K02089%09%23FFFFFF,green/K01403%09%23FFFFFF,red/K08523%09%23FFFFFF,red/K04365%09%23FFFFF…
mmu04666	Fc gamma R-mediated phagocytosis	Organismal Systems	Immune system	24	6	30	80	0.00476307	0.0166708	ENSMUSG00000047945(Marcksl1),ENSMUSG00000022272(Myo10),ENSMUSG00000033220(Rac2),ENSMUSG00000039936(Pik3cd),ENSMUSG00000015950(Ncf1),ENSMUSG00000015947(Fcgr1),ENSMUSG00000003283(Hck),ENSMUSG00000041417(Pik3r1),ENSMUSG00000028698(Pik3r3),ENSMUSG00000028126(Pip5k1a),ENSMUSG00000069662(Marcks),ENSMUSG00000026656(Fcgr2b),ENSMUSG00000008475(Arpc5),ENSMUSG00000022377(Asap1),ENSMUSG00000021948(Prkcd),ENS…	ENSMUSG00000031834(Pik3r2),ENSMUSG00000026288(Inpp5d),ENSMUSG00000020451(Limk2),ENSMUSG00000029674(Limk1),ENSMUSG00000016933(Plcg1),ENSMUSG00000009621(Vav2)	http://www.kegg.jp/kegg-bin/show_pathway?map04666/K05744%09%23FFFFFF,green/K02649%09%23FFFFFF,purple/K06498%09%23FFFFFF,red/K05855%09%23FFFFFF,red/K05854%09%23FFFFFF,red/K00922%09%23FFFFFF,red/K05754%09%23FFFFFF,red/K12561%09%23FFFFFF,red/K06274%09%23FFFFFF,red/K08011%09%23FFFFFF,red/K08893%09%23FFFFFF,red/K01080%09%23FFFFFF,red/K01116%09%23FFFFFF,green/K12560%09%23FFFFFF,red/K05730%09%23FFFFFF,g…
mmu04920	Adipocytokine signaling pathway	Organismal Systems	Endocrine system	20	7	27	71	0.00578517	0.0200062	ENSMUSG00000018796(Acsl1),ENSMUSG00000028645(Slc2a1),ENSMUSG00000030595(Nfkbib),ENSMUSG00000028163(Nfkb1),ENSMUSG00000021936(Mapk8),ENSMUSG00000024401(Tnf),ENSMUSG00000030341(Tnfrsf1a),ENSMUSG00000043733(Ptpn11),ENSMUSG00000004221(Ikbkg),ENSMUSG00000023947(Nfkbie),ENSMUSG00000024789(Jak2),ENSMUSG00000029471(Camkk2),ENSMUSG00000024927(Rela),ENSMUSG00000028599(Tnfrsf1b),ENSMUSG00000053113(Socs3),EN…	ENSMUSG00000042010(Acacb),ENSMUSG00000038894(Irs2),ENSMUSG00000015846(Rxra),ENSMUSG00000039656(Rxrb),ENSMUSG00000040618(Pck2),ENSMUSG00000028944(Prkag2),ENSMUSG00000055980(Irs1)	http://www.kegg.jp/kegg-bin/show_pathway?map04920/K01897%09%23FFFFFF,red/K01596%09%23FFFFFF,green/K07187%09%23FFFFFF,green/K05141%09%23FFFFFF,red/K04696%09%23FFFFFF,red/K04440%09%23FFFFFF,red/K02580%09%23FFFFFF,red/K02581%09%23FFFFFF,red/K01946%09%23FFFFFF,green/K07200%09%23FFFFFF,green/K07299%09%23FFFFFF,red/K04692%09%23FFFFFF,red/K08525%09%23FFFFFF,green/K07359%09%23FFFFFF,red/K04447%09%23FFFFF…
mmu04144	Endocytosis	Cellular Processes	Transport and catabolism	52	28	80	258	0.00584309	0.0200062	ENSMUSG00000079227(Ccr5),ENSMUSG00000019868(Vta1),ENSMUSG00000036986(Pml),ENSMUSG00000016206(H2-M3),ENSMUSG00000067212(H2-T23),ENSMUSG00000053835(H2-T24),ENSMUSG00000061232(H2-K1),ENSMUSG00000036499(Eea1),ENSMUSG00000020671(Rab10),ENSMUSG00000034560(Washc4),ENSMUSG00000034484(Snx2),ENSMUSG00000006740(Kif5b),ENSMUSG00000091971(Hspa1a),ENSMUSG00000070372(Capza1),ENSMUSG00000020440(Arf5),ENSMUSG0000…	ENSMUSG00000075284(Wipf1),ENSMUSG00000001036(Epn2),ENSMUSG00000024065(Ehd3),ENSMUSG00000031988(Vps26b),ENSMUSG00000045382(Cxcr4),ENSMUSG00000019478(Rab4a),ENSMUSG00000007613(Tgfbr1),ENSMUSG00000032440(Tgfbr2),ENSMUSG00000036580(Spg20),ENSMUSG00000005699(Pard6a),ENSMUSG00000001827(Folr1),ENSMUSG00000027423(Snx5),ENSMUSG00000059970(Hspa2),ENSMUSG00000023353(Agap3),ENSMUSG00000041058(Wwp1),ENSMUSG00…	http://www.kegg.jp/kegg-bin/show_pathway?map04144/K12476%09%23FFFFFF,green/K04388%09%23FFFFFF,green/K21269%09%23FFFFFF,green/K19476%09%23FFFFFF,red/K11825%09%23FFFFFF,red/K12485%09%23FFFFFF,green/K12472%09%23FFFFFF,red/K13649%09%23FFFFFF,green/K00910%09%23FFFFFF,red/K10396%09%23FFFFFF,purple/K17919%09%23FFFFFF,red/K03283%09%23FFFFFF,purple/K12478%09%23FFFFFF,red/K17917%09%23FFFFFF,red/K12488%09%2…
mmu05215	Prostate cancer	Human Diseases	Cancers: Specific types	20	14	34	95	0.00648573	0.0219678	ENSMUSG00000039936(Pik3cd),ENSMUSG00000024620(Pdgfrb),ENSMUSG00000004936(Map2k1),ENSMUSG00000017737(Mmp9),ENSMUSG00000020122(Egfr),ENSMUSG00000041417(Pik3r1),ENSMUSG00000053007(Creb5),ENSMUSG00000024241(Sos1),ENSMUSG00000020184(Mdm2),ENSMUSG00000023067(Cdkn1a),ENSMUSG00000004221(Ikbkg),ENSMUSG00000028698(Pik3r3),ENSMUSG00000021025(Nfkbia),ENSMUSG00000000385(Tmprss2),ENSMUSG00000028163(Nfkb1),ENSM…	ENSMUSG00000025856(Pdgfa),ENSMUSG00000044167(Foxo1),ENSMUSG00000038648(Creb3l2),ENSMUSG00000028914(Casp9),ENSMUSG00000027315(Spint1),ENSMUSG00000018983(E2f2),ENSMUSG00000025358(Cdk2),ENSMUSG00000022105(Rb1),ENSMUSG00000028019(Pdgfc),ENSMUSG00000031565(Fgfr1),ENSMUSG00000031834(Pik3r2),ENSMUSG00000027490(E2f1),ENSMUSG00000070348(Ccnd1),ENSMUSG00000028017(Egf)	http://www.kegg.jp/kegg-bin/show_pathway?map05215/K05450%09%23FFFFFF,green/K02649%09%23FFFFFF,purple/K06643%09%23FFFFFF,red/K04359%09%23FFFFFF,green/K04734%09%23FFFFFF,red/K02206%09%23FFFFFF,green/K04735%09%23FFFFFF,red/K04368%09%23FFFFFF,red/K02580%09%23FFFFFF,red/K06618%09%23FFFFFF,green/K17454%09%23FFFFFF,green/K04079%09%23FFFFFF,red/K09389%09%23FFFFFF,green/K09047%09%23FFFFFF,red/K09048%09%23…
mmu04514	Cell adhesion molecules (CAMs)	Environmental Information Processing	Signaling molecules and interaction	47	5	52	158	0.00678708	0.022744	ENSMUSG00000033295(Ptprf),ENSMUSG00000020717(Pecam1),ENSMUSG00000017009(Sdc4),ENSMUSG00000000732(Icosl),ENSMUSG00000037405(Icam1),ENSMUSG00000025809(Itgb1),ENSMUSG00000022636(Alcam),ENSMUSG00000020592(Sdc1),ENSMUSG00000035513(Ntng2),ENSMUSG00000060586(H2-Eb1),ENSMUSG00000062300(Nectin2),ENSMUSG00000022901(Cd86),ENSMUSG00000016206(H2-M3),ENSMUSG00000067212(H2-T23),ENSMUSG00000053835(H2-T24),ENSMUS…	ENSMUSG00000032340(Neo1),ENSMUSG00000020598(Nrcam),ENSMUSG00000027111(Itga6),ENSMUSG00000017167(Cntnap1),ENSMUSG00000026012(Cd28)	http://www.kegg.jp/kegg-bin/show_pathway?map04514/K06490%09%23FFFFFF,red/K06531%09%23FFFFFF,red/K06591%09%23FFFFFF,red/K06744%09%23FFFFFF,red/K06477%09%23FFFFFF,red/K06527%09%23FFFFFF,red/K05719%09%23FFFFFF,red/K06539%09%23FFFFFF,red/K06087%09%23FFFFFF,red/K05718%09%23FFFFFF,red/K05413%09%23FFFFFF,red/K06461%09%23FFFFFF,red/K06470%09%23FFFFFF,green/K06745%09%23FFFFFF,red/K06585%09%23FFFFFF,red/K1…
mmu03430	Mismatch repair	Genetic Information Processing	Replication and repair	0	11	11	22	0.00719608	0.0236681	-	ENSMUSG00000029191(Rfc1),ENSMUSG00000000751(Rpa1),ENSMUSG00000024151(Msh2),ENSMUSG00000023104(Rfc2),ENSMUSG00000032498(Mlh1),ENSMUSG00000056394(Lig1),ENSMUSG00000012483(Rpa3),ENSMUSG00000038644(Pold1),ENSMUSG00000021245(Mlh3),ENSMUSG00000079109(Pms2),ENSMUSG00000005370(Msh6)	http://www.kegg.jp/kegg-bin/show_pathway?map03430/K07466%09%23FFFFFF,green/K10740%09%23FFFFFF,green/K08739%09%23FFFFFF,green/K08737%09%23FFFFFF,green/K08735%09%23FFFFFF,green/K10858%09%23FFFFFF,green/K10754%09%23FFFFFF,green/K02327%09%23FFFFFF,green/K08734%09%23FFFFFF,green/K10755%09%23FFFFFF,green/K10747%09%23FFFFFF,green/
mmu04066	HIF-1 signaling pathway	Environmental Information Processing	Signal transduction	26	9	35	99	0.00721314	0.0236681	ENSMUSG00000015340(Cybb),ENSMUSG00000057666(Gapdh),ENSMUSG00000053819(Camk2d),ENSMUSG00000021367(Edn1),ENSMUSG00000028698(Pik3r3),ENSMUSG00000058709(Egln2),ENSMUSG00000004040(Stat3),ENSMUSG00000079658(Eloc),ENSMUSG00000041417(Pik3r1),ENSMUSG00000039936(Pik3cd),ENSMUSG00000021109(Hif1a),ENSMUSG00000024231(Cul2),ENSMUSG00000037411(Serpine1),ENSMUSG00000028163(Nfkb1),ENSMUSG00000028156(Eif4e),ENSMUS…	ENSMUSG00000021820(Camk2g),ENSMUSG00000031834(Pik3r2),ENSMUSG00000016933(Plcg1),ENSMUSG00000020190(Mknk2),ENSMUSG00000031465(Angpt2),ENSMUSG00000005534(Insr),ENSMUSG00000028017(Egf),ENSMUSG00000060600(Eno3),ENSMUSG00000027947(Il6ra)	http://www.kegg.jp/kegg-bin/show_pathway?map04066/K02580%09%23FFFFFF,red/K13241%09%23FFFFFF,red/K08268%09%23FFFFFF,red/K16366%09%23FFFFFF,red/K05466%09%23FFFFFF,green/K03870%09%23FFFFFF,red/K03982%09%23FFFFFF,red/K04692%09%23FFFFFF,red/K03259%09%23FFFFFF,red/K09592%09%23FFFFFF,red/K07299%09%23FFFFFF,red/K02649%09%23FFFFFF,purple/K05055%09%23FFFFFF,green/K05405%09%23FFFFFF,red/K05096%09%23FFFFFF,r…
mmu01521	EGFR tyrosine kinase inhibitor resistance	Human Diseases	Drug resistance: Antineoplastic	17	12	29	79	0.00768091	0.0249432	ENSMUSG00000002602(Axl),ENSMUSG00000024789(Jak2),ENSMUSG00000025746(Il6),ENSMUSG00000020122(Egfr),ENSMUSG00000004040(Stat3),ENSMUSG00000041417(Pik3r1),ENSMUSG00000039936(Pik3cd),ENSMUSG00000028156(Eif4e),ENSMUSG00000024620(Pdgfrb),ENSMUSG00000002413(Braf),ENSMUSG00000052889(Prkcb),ENSMUSG00000062991(Nrg1),ENSMUSG00000004936(Map2k1),ENSMUSG00000028698(Pik3r3),ENSMUSG00000027646(Src),ENSMUSG0000000…	ENSMUSG00000020312(Shc2),ENSMUSG00000028017(Egf),ENSMUSG00000027947(Il6ra),ENSMUSG00000031714(Gab1),ENSMUSG00000028864(Hgf),ENSMUSG00000028019(Pdgfc),ENSMUSG00000016933(Plcg1),ENSMUSG00000025856(Pdgfa),ENSMUSG00000048756(Foxo3),ENSMUSG00000031834(Pik3r2),ENSMUSG00000035109(Shc4),ENSMUSG00000031451(Gas6)	http://www.kegg.jp/kegg-bin/show_pathway?map01521/K09408%09%23FFFFFF,green/K04361%09%23FFFFFF,red/K04447%09%23FFFFFF,red/K01116%09%23FFFFFF,green/K05704%09%23FFFFFF,red/K04365%09%23FFFFFF,red/K17447%09%23FFFFFF,green/K05405%09%23FFFFFF,red/K09593%09%23FFFFFF,green/K04368%09%23FFFFFF,red/K04359%09%23FFFFFF,green/K05089%09%23FFFFFF,red/K05460%09%23FFFFFF,green/K04692%09%23FFFFFF,red/K05455%09%23FFF…
mmu05340	Primary immunodeficiency	Human Diseases	Immune diseases	9	6	15	34	0.007857	0.0252546	ENSMUSG00000026395(Ptprc),ENSMUSG00000005774(Rfx5),ENSMUSG00000000409(Lck),ENSMUSG00000022504(Ciita),ENSMUSG00000037321(Tap1),ENSMUSG00000031304(Il2rg),ENSMUSG00000017652(Cd40),ENSMUSG00000004221(Ikbkg),ENSMUSG00000024339(Tap2)	ENSMUSG00000029591(Ung),ENSMUSG00000026117(Zap70),ENSMUSG00000036120(Rfxank),ENSMUSG00000036615(Rfxap),ENSMUSG00000003882(Il7r),ENSMUSG00000017697(Ada)	http://www.kegg.jp/kegg-bin/show_pathway?map05340/K05070%09%23FFFFFF,red/K07210%09%23FFFFFF,red/K05653%09%23FFFFFF,red/K07360%09%23FFFFFF,green/K03160%09%23FFFFFF,red/K08061%09%23FFFFFF,red/K03648%09%23FFFFFF,green/K08060%09%23FFFFFF,red/K05654%09%23FFFFFF,red/K05072%09%23FFFFFF,green/K05856%09%23FFFFFF,red/K06478%09%23FFFFFF,red/K08063%09%23FFFFFF,green/K01488%09%23FFFFFF,green/K08062%09%23FFFFF…
mmu04217	Necroptosis	Cellular Processes	Cell growth and death	47	9	56	174	0.00849939	0.0270435	ENSMUSG00000022971(Ifnar2),ENSMUSG00000056130(Ticam2),ENSMUSG00000047123(Ticam1),ENSMUSG00000002325(Irf9),ENSMUSG00000027514(Zbp1),ENSMUSG00000037894(H2az1),ENSMUSG00000026031(Cflar),ENSMUSG00000004446(Bid),ENSMUSG00000019850(Tnfaip3),ENSMUSG00000053819(Camk2d),ENSMUSG00000024401(Tnf),ENSMUSG00000032691(Nlrp3),ENSMUSG00000015340(Cybb),ENSMUSG00000026942(Traf2),ENSMUSG00000004040(Stat3),ENSMUSG000…	ENSMUSG00000021820(Camk2g),ENSMUSG00000033594(Spata2l),ENSMUSG00000037049(Smpd1),ENSMUSG00000020086(Macroh2a2),ENSMUSG00000069272(H2ac8),ENSMUSG00000033059(Pygb),ENSMUSG00000031077(Fadd),ENSMUSG00000026473(Glul),ENSMUSG00000041126(H2az2)	http://www.kegg.jp/kegg-bin/show_pathway?map04217/K11223%09%23FFFFFF,red/K02373%09%23FFFFFF,green/K11220%09%23FFFFFF,red/K17595%09%23FFFFFF,green/K16342%09%23FFFFFF,red/K05130%09%23FFFFFF,red/K04519%09%23FFFFFF,red/K11974%09%23FFFFFF,red/K03173%09%23FFFFFF,red/K04398%09%23FFFFFF,red/K08601%09%23FFFFFF,red/K11859%09%23FFFFFF,red/K04726%09%23FFFFFF,red/K11251%09%23FFFFFF,purple/K04724%09%23FFFFFF,r…
mmu04071	Sphingolipid signaling pathway	Environmental Information Processing	Signal transduction	32	7	39	114	0.00880455	0.0277343	ENSMUSG00000026626(Ppp2r5a),ENSMUSG00000028698(Pik3r3),ENSMUSG00000030341(Tnfrsf1a),ENSMUSG00000026942(Traf2),ENSMUSG00000024401(Tnf),ENSMUSG00000033220(Rac2),ENSMUSG00000039936(Pik3cd),ENSMUSG00000004446(Bid),ENSMUSG00000000001(Gnai3),ENSMUSG00000041417(Pik3r1),ENSMUSG00000020349(Ppp2ca),ENSMUSG00000021936(Mapk8),ENSMUSG00000028163(Nfkb1),ENSMUSG00000009630(Ppp2cb),ENSMUSG00000024887(Asah2),ENSM…	ENSMUSG00000031834(Pik3r2),ENSMUSG00000040061(Plcb2),ENSMUSG00000021054(Sgpp1),ENSMUSG00000037049(Smpd1),ENSMUSG00000045092(S1pr1),ENSMUSG00000019822(Smpd2),ENSMUSG00000000149(Gna12)	http://www.kegg.jp/kegg-bin/show_pathway?map04071/K12351%09%23FFFFFF,green/K02649%09%23FFFFFF,purple/K04354%09%23FFFFFF,red/K00922%09%23FFFFFF,red/K04441%09%23FFFFFF,red/K04639%09%23FFFFFF,red/K04426%09%23FFFFFF,red/K03156%09%23FFFFFF,red/K04346%09%23FFFFFF,green/K04634%09%23FFFFFF,red/K00654%09%23FFFFFF,red/K12350%09%23FFFFFF,green/K03158%09%23FFFFFF,red/K04288%09%23FFFFFF,green/K04440%09%23FFFF…
mmu04928	Parathyroid hormone synthesis, secretion and action	Organismal Systems	Endocrine system	17	20	37	108	0.0102687	0.0317924	ENSMUSG00000066406(Akap13),ENSMUSG00000024960(Plcb3),ENSMUSG00000023067(Cdkn1a),ENSMUSG00000052889(Prkcb),ENSMUSG00000028525(Pde4b),ENSMUSG00000024486(Hbegf),ENSMUSG00000002413(Braf),ENSMUSG00000004936(Map2k1),ENSMUSG00000020122(Egfr),ENSMUSG00000053007(Creb5),ENSMUSG00000024639(Gnaq),ENSMUSG00000000957(Mmp14),ENSMUSG00000026826(Nr4a2),ENSMUSG00000020611(Gna13),ENSMUSG00000000001(Gnai3),ENSMUSG00…	ENSMUSG00000021250(Fos),ENSMUSG00000018909(Arrb1),ENSMUSG00000039153(Runx2),ENSMUSG00000042644(Itpr3),ENSMUSG00000005580(Adcy9),ENSMUSG00000000149(Gna12),ENSMUSG00000005469(Prkaca),ENSMUSG00000005583(Mef2c),ENSMUSG00000039656(Rxrb),ENSMUSG00000031659(Adcy7),ENSMUSG00000031565(Fgfr1),ENSMUSG00000001419(Mef2d),ENSMUSG00000020654(Adcy3),ENSMUSG00000021699(Pde4d),ENSMUSG00000024913(Lrp5),ENSMUSG00000…	http://www.kegg.jp/kegg-bin/show_pathway?map04928/K07994%09%23FFFFFF,red/K04639%09%23FFFFFF,red/K06625%09%23FFFFFF,red/K08043%09%23FFFFFF,green/K09278%09%23FFFFFF,green/K07763%09%23FFFFFF,red/K03068%09%23FFFFFF,green/K04439%09%23FFFFFF,green/K04630%09%23FFFFFF,red/K08524%09%23FFFFFF,green/K08523%09%23FFFFFF,red/K08558%09%23FFFFFF,red/K08049%09%23FFFFFF,green/K04634%09%23FFFFFF,red/K04960%09%23FFF…
mmu00532	Glycosaminoglycan biosynthesis - chondroitin sulfate / dermatan sulfate	Metabolism	Glycan biosynthesis and metabolism	5	5	10	20	0.0102947	0.0317924	ENSMUSG00000039497(Dse),ENSMUSG00000030930(Chst15),ENSMUSG00000037347(Chst7),ENSMUSG00000047712(Ust),ENSMUSG00000058152(Chsy3)	ENSMUSG00000074916(Chst14),ENSMUSG00000036599(Chst12),ENSMUSG00000030657(Xylt1),ENSMUSG00000021504(B4galt7),ENSMUSG00000057337(Chst3)	http://www.kegg.jp/kegg-bin/show_pathway?map00532/K04743%09%23FFFFFF,red/K13499%09%23FFFFFF,red/K01794%09%23FFFFFF,red/K08106%09%23FFFFFF,red/K03193%09%23FFFFFF,red/K04742%09%23FFFFFF,green/K08105%09%23FFFFFF,green/K01020%09%23FFFFFF,green/K00771%09%23FFFFFF,green/K00733%09%23FFFFFF,green/
mmu03030	DNA replication	Genetic Information Processing	Replication and repair	0	15	15	35	0.01075	0.0328761	-	ENSMUSG00000036875(Dna2),ENSMUSG00000038644(Pold1),ENSMUSG00000012483(Rpa3),ENSMUSG00000023104(Rfc2),ENSMUSG00000002870(Mcm2),ENSMUSG00000006678(Pola1),ENSMUSG00000056394(Lig1),ENSMUSG00000007080(Pole),ENSMUSG00000041859(Mcm3),ENSMUSG00000029191(Rfc1),ENSMUSG00000025395(Prim1),ENSMUSG00000020974(Pole2),ENSMUSG00000000751(Rpa1),ENSMUSG00000029730(Mcm7),ENSMUSG00000022673(Mcm4)	http://www.kegg.jp/kegg-bin/show_pathway?map03030/K02327%09%23FFFFFF,green/K02540%09%23FFFFFF,green/K02325%09%23FFFFFF,green/K02212%09%23FFFFFF,green/K10742%09%23FFFFFF,green/K07466%09%23FFFFFF,green/K02684%09%23FFFFFF,green/K02324%09%23FFFFFF,green/K02541%09%23FFFFFF,green/K10747%09%23FFFFFF,green/K02320%09%23FFFFFF,green/K10755%09%23FFFFFF,green/K02210%09%23FFFFFF,green/K10754%09%23FFFFFF,green…
mmu00640	Propanoate metabolism	Metabolism	Carbohydrate metabolism	3	11	14	32	0.0109955	0.0333036	ENSMUSG00000020664(Dld),ENSMUSG00000062480(Acat3),ENSMUSG00000032263(Bckdhb)	ENSMUSG00000041426(Hibch),ENSMUSG00000022853(Ehhadh),ENSMUSG00000019883(Echdc1),ENSMUSG00000023921(Mmut),ENSMUSG00000042010(Acacb),ENSMUSG00000025465(Echs1),ENSMUSG00000041650(Pcca),ENSMUSG00000027452(Acss1),ENSMUSG00000062908(Acadm),ENSMUSG00000060376(Bckdha),ENSMUSG00000074064(Mlycd)	http://www.kegg.jp/kegg-bin/show_pathway?map00640/K07511%09%23FFFFFF,green/K00249%09%23FFFFFF,green/K01847%09%23FFFFFF,green/K00626%09%23FFFFFF,red/K00166%09%23FFFFFF,green/K01895%09%23FFFFFF,green/K18426%09%23FFFFFF,green/K00167%09%23FFFFFF,red/K05605%09%23FFFFFF,green/K01965%09%23FFFFFF,green/K07514%09%23FFFFFF,green/K01946%09%23FFFFFF,green/K00382%09%23FFFFFF,red/K01578%09%23FFFFFF,green/
mmu03460	Fanconi anemia pathway	Genetic Information Processing	Replication and repair	3	17	20	51	0.0111824	0.0335473	ENSMUSG00000032512(Wdr48),ENSMUSG00000034329(Brip1),ENSMUSG00000024170(Telo2)	ENSMUSG00000041147(Brca2),ENSMUSG00000033458(Fan1),ENSMUSG00000007570(Fance),ENSMUSG00000059772(Slx1b),ENSMUSG00000000751(Rpa1),ENSMUSG00000021668(Polk),ENSMUSG00000019841(Rev3l),ENSMUSG00000044702(Palb2),ENSMUSG00000017146(Brca1),ENSMUSG00000032498(Mlh1),ENSMUSG00000026429(Ube2t),ENSMUSG00000007646(Rad51c),ENSMUSG00000028453(Fancg),ENSMUSG00000012483(Rpa3),ENSMUSG00000038425(Poli),ENSMUSG0000007…	http://www.kegg.jp/kegg-bin/show_pathway?map03460/K11137%09%23FFFFFF,red/K13960%09%23FFFFFF,green/K10740%09%23FFFFFF,green/K03511%09%23FFFFFF,green/K02350%09%23FFFFFF,green/K10901%09%23FFFFFF,green/K15362%09%23FFFFFF,red/K15363%09%23FFFFFF,green/K10605%09%23FFFFFF,green/K15078%09%23FFFFFF,green/K08734%09%23FFFFFF,green/K03510%09%23FFFFFF,green/K10870%09%23FFFFFF,green/K15361%09%23FFFFFF,red/K0877…
mmu05165	Human papillomavirus infection	Human Diseases	Infectious diseases: Viral	76	26	102	349	0.0136158	0.0404621	ENSMUSG00000028163(Nfkb1),ENSMUSG00000000184(Ccnd2),ENSMUSG00000019210(Atp6v1e1),ENSMUSG00000040033(Stat2),ENSMUSG00000009630(Ppp2cb),ENSMUSG00000032487(Ptgs2),ENSMUSG00000027641(Rbl1),ENSMUSG00000031503(Col4a2),ENSMUSG00000024620(Pdgfrb),ENSMUSG00000031925(Maml2),ENSMUSG00000028945(Rheb),ENSMUSG00000024241(Sos1),ENSMUSG00000020184(Mdm2),ENSMUSG00000042349(Ikbke),ENSMUSG00000018899(Irf1),ENSMUSG0…	ENSMUSG00000025358(Cdk2),ENSMUSG00000056214(Pard6g),ENSMUSG00000040289(Hey1),ENSMUSG00000044167(Foxo1),ENSMUSG00000006728(Cdk4),ENSMUSG00000020689(Itgb3),ENSMUSG00000001930(Vwf),ENSMUSG00000067071(Hes6),ENSMUSG00000031834(Pik3r2),ENSMUSG00000022817(Itgb5),ENSMUSG00000005699(Pard6a),ENSMUSG00000024421(Lama3),ENSMUSG00000038648(Creb3l2),ENSMUSG00000022105(Rb1),ENSMUSG00000029570(Lfng),ENSMUSG000000…	http://www.kegg.jp/kegg-bin/show_pathway?map05165/K10389%09%23FFFFFF,green/K06485%09%23FFFFFF,green/K07211%09%23FFFFFF,red/K02580%09%23FFFFFF,red/K06618%09%23FFFFFF,green/K00922%09%23FFFFFF,red/K02146%09%23FFFFFF,green/K06484%09%23FFFFFF,red/K11219%09%23FFFFFF,red/K06493%09%23FFFFFF,green/K04345%09%23FFFFFF,green/K04390%09%23FFFFFF,red/K11220%09%23FFFFFF,red/K02432%09%23FFFFFF,red/K03900%09%23FFF…
mmu04146	Peroxisome	Cellular Processes	Transport and catabolism	10	20	30	86	0.0149417	0.0436248	ENSMUSG00000031278(Acsl4),ENSMUSG00000021417(Eci2),ENSMUSG00000024981(Acsl5),ENSMUSG00000024953(Prdx5),ENSMUSG00000028691(Prdx1),ENSMUSG00000020826(Nos2),ENSMUSG00000006818(Sod2),ENSMUSG00000030759(Far1),ENSMUSG00000022404(Slc25a17),ENSMUSG00000018796(Acsl1)	ENSMUSG00000026189(Pecr),ENSMUSG00000000876(Pxmp4),ENSMUSG00000107283(Mpv17),ENSMUSG00000074064(Mlycd),ENSMUSG00000029098(Acox3),ENSMUSG00000053898(Ech1),ENSMUSG00000028672(Hmgcl),ENSMUSG00000022679(Mpv17l),ENSMUSG00000036775(Decr2),ENSMUSG00000034875(Nudt19),ENSMUSG00000029047(Pex10),ENSMUSG00000069633(Pex11g),ENSMUSG00000055782(Abcd2),ENSMUSG00000021240(Abcd4),ENSMUSG00000022244(Amacr),ENSMUSG0…	http://www.kegg.jp/kegg-bin/show_pathway?map04146/K13279%09%23FFFFFF,red/K00308%09%23FFFFFF,green/K17879%09%23FFFFFF,green/K05675%09%23FFFFFF,green/K05940%09%23FFFFFF,green/K13356%09%23FFFFFF,red/K13348%09%23FFFFFF,green/K01796%09%23FFFFFF,green/K07753%09%23FFFFFF,green/K05676%09%23FFFFFF,green/K00232%09%23FFFFFF,green/K11187%09%23FFFFFF,red/K13355%09%23FFFFFF,green/K04564%09%23FFFFFF,red/K13354%…
mmu00760	Nicotinate and nicotinamide metabolism	Metabolism	Metabolism of cofactors and vitamins	8	6	14	33	0.0149571	0.0436248	ENSMUSG00000020572(Nampt),ENSMUSG00000029084(Cd38),ENSMUSG00000068417(Pnp2),ENSMUSG00000054958(Nt5c1a),ENSMUSG00000029063(Nadk),ENSMUSG00000063558(Aox1),ENSMUSG00000115338(Pnp),ENSMUSG00000029082(Bst1)	ENSMUSG00000022574(Naprt),ENSMUSG00000037370(Enpp1),ENSMUSG00000031090(Nadsyn1),ENSMUSG00000032456(Nmnat3),ENSMUSG00000022253(Nadk2),ENSMUSG00000025041(Nt5c2)	http://www.kegg.jp/kegg-bin/show_pathway?map00760/K01081%09%23FFFFFF,purple/K01513%09%23FFFFFF,green/K18152%09%23FFFFFF,red/K06210%09%23FFFFFF,green/K01242%09%23FFFFFF,red/K03783%09%23FFFFFF,red/K00858%09%23FFFFFF,purple/K00763%09%23FFFFFF,green/K00157%09%23FFFFFF,red/K03462%09%23FFFFFF,red/K01950%09%23FFFFFF,green/
mmu00280	Valine, leucine and isoleucine degradation	Metabolism	Amino acid metabolism	5	16	21	56	0.0165369	0.04779	ENSMUSG00000093930(Hmgcs1),ENSMUSG00000063558(Aox1),ENSMUSG00000020664(Dld),ENSMUSG00000062480(Acat3),ENSMUSG00000032263(Bckdhb)	ENSMUSG00000021460(Auh),ENSMUSG00000022853(Ehhadh),ENSMUSG00000041426(Hibch),ENSMUSG00000027332(Ivd),ENSMUSG00000027709(Mccc1),ENSMUSG00000023921(Mmut),ENSMUSG00000028672(Hmgcl),ENSMUSG00000025465(Echs1),ENSMUSG00000026687(Aldh9a1),ENSMUSG00000029545(Acads),ENSMUSG00000060376(Bckdha),ENSMUSG00000027984(Hadh),ENSMUSG00000062908(Acadm),ENSMUSG00000021646(Mccc2),ENSMUSG00000041650(Pcca),ENSMUSG00000…	http://www.kegg.jp/kegg-bin/show_pathway?map00280/K00022%09%23FFFFFF,green/K01847%09%23FFFFFF,green/K05605%09%23FFFFFF,green/K00167%09%23FFFFFF,red/K00149%09%23FFFFFF,green/K00382%09%23FFFFFF,red/K00253%09%23FFFFFF,green/K07514%09%23FFFFFF,green/K00249%09%23FFFFFF,green/K01965%09%23FFFFFF,green/K01969%09%23FFFFFF,green/K00166%09%23FFFFFF,green/K05607%09%23FFFFFF,green/K00626%09%23FFFFFF,red/K0750…
mmu04931	Insulin resistance	Human Diseases	Endocrine and metabolic diseases	20	16	36	108	0.0176167	0.0504478	ENSMUSG00000014956(Ppp1cb),ENSMUSG00000053113(Socs3),ENSMUSG00000027540(Ptpn1),ENSMUSG00000021936(Mapk8),ENSMUSG00000028163(Nfkb1),ENSMUSG00000039936(Pik3cd),ENSMUSG00000041417(Pik3r1),ENSMUSG00000030341(Tnfrsf1a),ENSMUSG00000004040(Stat3),ENSMUSG00000043733(Ptpn11),ENSMUSG00000021025(Nfkbia),ENSMUSG00000028698(Pik3r3),ENSMUSG00000033295(Ptprf),ENSMUSG00000024401(Tnf),ENSMUSG00000053007(Creb5),EN…	ENSMUSG00000038894(Irs2),ENSMUSG00000055980(Irs1),ENSMUSG00000044167(Foxo1),ENSMUSG00000028944(Prkag2),ENSMUSG00000024600(Slc27a6),ENSMUSG00000031808(Slc27a1),ENSMUSG00000040618(Pck2),ENSMUSG00000032715(Trib3),ENSMUSG00000038648(Creb3l2),ENSMUSG00000031834(Pik3r2),ENSMUSG00000049999(Ppp1r3d),ENSMUSG00000042010(Acacb),ENSMUSG00000005534(Insr),ENSMUSG00000033083(Tbc1d4),ENSMUSG00000046794(Ppp1r3b),…	http://www.kegg.jp/kegg-bin/show_pathway?map04931/K05405%09%23FFFFFF,red/K04734%09%23FFFFFF,red/K16172%09%23FFFFFF,green/K04440%09%23FFFFFF,red/K04735%09%23FFFFFF,red/K04696%09%23FFFFFF,red/K17902%09%23FFFFFF,green/K05696%09%23FFFFFF,red/K07187%09%23FFFFFF,green/K04692%09%23FFFFFF,red/K00922%09%23FFFFFF,red/K07200%09%23FFFFFF,green/K04527%09%23FFFFFF,green/K02649%09%23FFFFFF,purple/K06068%09%23FF…
mmu04810	Regulation of actin cytoskeleton	Cellular Processes	Cell motility	45	19	64	210	0.0184536	0.0523682	ENSMUSG00000024290(Rock1),ENSMUSG00000027009(Itga4),ENSMUSG00000025321(Itgb8),ENSMUSG00000039115(Itga9),ENSMUSG00000029580(Actb),ENSMUSG00000062825(Actg1),ENSMUSG00000006134(Crkl),ENSMUSG00000000555(Itga5),ENSMUSG00000055723(Rras2),ENSMUSG00000002413(Braf),ENSMUSG00000030447(Cyfip1),ENSMUSG00000030786(Itgam),ENSMUSG00000020122(Egfr),ENSMUSG00000021990(Spata13),ENSMUSG00000004936(Map2k1),ENSMUSG00…	ENSMUSG00000025856(Pdgfa),ENSMUSG00000045382(Cxcr4),ENSMUSG00000025372(Baiap2),ENSMUSG00000000149(Gna12),ENSMUSG00000027111(Itga6),ENSMUSG00000028017(Egf),ENSMUSG00000031565(Fgfr1),ENSMUSG00000034868(Myl12b),ENSMUSG00000037926(Ssh2),ENSMUSG00000022817(Itgb5),ENSMUSG00000028019(Pdgfc),ENSMUSG00000031834(Pik3r2),ENSMUSG00000020689(Itgb3),ENSMUSG00000027805(Pfn2),ENSMUSG00000020451(Limk2),ENSMUSG000…	http://www.kegg.jp/kegg-bin/show_pathway?map04810/K05743%09%23FFFFFF,green/K03099%09%23FFFFFF,red/K08390%09%23FFFFFF,green/K05719%09%23FFFFFF,red/K17388%09%23FFFFFF,red/K04361%09%23FFFFFF,red/K06585%09%23FFFFFF,red/K05089%09%23FFFFFF,red/K06483%09%23FFFFFF,red/K05759%09%23FFFFFF,green/K04189%09%23FFFFFF,green/K05769%09%23FFFFFF,purple/K04438%09%23FFFFFF,red/K04514%09%23FFFFFF,red/K06461%09%23FFFF…
mmu04919	Thyroid hormone signaling pathway	Organismal Systems	Endocrine system	23	14	37	112	0.0188278	0.0529025	ENSMUSG00000041417(Pik3r1),ENSMUSG00000021109(Hif1a),ENSMUSG00000039936(Pik3cd),ENSMUSG00000000708(Kat2b),ENSMUSG00000028945(Rheb),ENSMUSG00000018160(Med1),ENSMUSG00000062825(Actg1),ENSMUSG00000026923(Notch1),ENSMUSG00000028800(Hdac1),ENSMUSG00000027878(Notch2),ENSMUSG00000034297(Med13),ENSMUSG00000018076(Med13l),ENSMUSG00000028698(Pik3r3),ENSMUSG00000027646(Src),ENSMUSG00000020184(Mdm2),ENSMUSG0…	ENSMUSG00000007682(Dio2),ENSMUSG00000020689(Itgb3),ENSMUSG00000016933(Plcg1),ENSMUSG00000033083(Tbc1d4),ENSMUSG00000039656(Rxrb),ENSMUSG00000005469(Prkaca),ENSMUSG00000020647(Ncoa1),ENSMUSG00000015846(Rxra),ENSMUSG00000031834(Pik3r2),ENSMUSG00000040061(Plcb2),ENSMUSG00000044167(Foxo1),ENSMUSG00000070348(Ccnd1),ENSMUSG00000028914(Casp9),ENSMUSG00000026409(Pfkfb2)	http://www.kegg.jp/kegg-bin/show_pathway?map04919/K08187%09%23FFFFFF,red/K07299%09%23FFFFFF,red/K17902%09%23FFFFFF,green/K02649%09%23FFFFFF,purple/K08524%09%23FFFFFF,green/K08268%09%23FFFFFF,red/K15164%09%23FFFFFF,red/K08525%09%23FFFFFF,green/K04377%09%23FFFFFF,red/K06643%09%23FFFFFF,red/K05692%09%23FFFFFF,red/K04503%09%23FFFFFF,green/K17904%09%23FFFFFF,green/K05704%09%23FFFFFF,red/K04368%09%23FF…
mmu05216	Thyroid cancer	Human Diseases	Cancers: Specific types	8	7	15	37	0.0189777	0.0529025	ENSMUSG00000004936(Map2k1),ENSMUSG00000006005(Tpr),ENSMUSG00000027940(Tpm3),ENSMUSG00000022346(Myc),ENSMUSG00000023067(Cdkn1a),ENSMUSG00000002413(Braf),ENSMUSG00000057789(Bak1),ENSMUSG00000015312(Gadd45b)	ENSMUSG00000002109(Ddb2),ENSMUSG00000039656(Rxrb),ENSMUSG00000021453(Gadd45g),ENSMUSG00000070348(Ccnd1),ENSMUSG00000015846(Rxra),ENSMUSG00000021668(Polk),ENSMUSG00000000440(Pparg)	http://www.kegg.jp/kegg-bin/show_pathway?map05216/K04365%09%23FFFFFF,red/K04402%09%23FFFFFF,purple/K08525%09%23FFFFFF,green/K14021%09%23FFFFFF,red/K04368%09%23FFFFFF,red/K03511%09%23FFFFFF,green/K08524%09%23FFFFFF,green/K09290%09%23FFFFFF,red/K04503%09%23FFFFFF,green/K04377%09%23FFFFFF,red/K10140%09%23FFFFFF,green/K09291%09%23FFFFFF,red/K08530%09%23FFFFFF,green/K06625%09%23FFFFFF,red/
mmu04122	Sulfur relay system	Genetic Information Processing	Folding, sorting and degradation	2	3	5	8	0.0229464	0.0634046	ENSMUSG00000049482(Ctu2),ENSMUSG00000038888(Ctu1)	ENSMUSG00000044986(Tst),ENSMUSG00000027618(Nfs1),ENSMUSG00000071711(Mpst)	http://www.kegg.jp/kegg-bin/show_pathway?map04122/K14169%09%23FFFFFF,red/K04487%09%23FFFFFF,green/K14168%09%23FFFFFF,red/K01011%09%23FFFFFF,green/
mmu04120	Ubiquitin mediated proteolysis	Genetic Information Processing	Folding, sorting and degradation	28	16	44	139	0.0240417	0.0656856	ENSMUSG00000040749(Siah1b),ENSMUSG00000020184(Mdm2),ENSMUSG00000053113(Socs3),ENSMUSG00000058317(Ube2e2),ENSMUSG00000004364(Cul3),ENSMUSG00000025939(Ube2w),ENSMUSG00000019927(Ube2d1),ENSMUSG00000035898(Uba6),ENSMUSG00000024231(Cul2),ENSMUSG00000079658(Eloc),ENSMUSG00000032596(Uba7),ENSMUSG00000034343(Ube2f),ENSMUSG00000021774(Ube2e1),ENSMUSG00000060860(Ube2s),ENSMUSG00000027078(Ube2l6),ENSMUSG000…	ENSMUSG00000028101(Pias3),ENSMUSG00000041058(Wwp1),ENSMUSG00000018548(Trim37),ENSMUSG00000022075(Rhobtb2),ENSMUSG00000044231(Nhlrc1),ENSMUSG00000023826(Prkn),ENSMUSG00000038545(Cul7),ENSMUSG00000024370(Cdc23),ENSMUSG00000029804(Herc3),ENSMUSG00000054115(Skp2),ENSMUSG00000002109(Ddb2),ENSMUSG00000028086(Fbxw7),ENSMUSG00000021754(Map3k1),ENSMUSG00000051675(Trim32),ENSMUSG00000019944(Rhobtb1),ENSMUS…	http://www.kegg.jp/kegg-bin/show_pathway?map04120/K10140%09%23FFFFFF,green/K03872%09%23FFFFFF,red/K03875%09%23FFFFFF,green/K10585%09%23FFFFFF,red/K10583%09%23FFFFFF,red/K16064%09%23FFFFFF,green/K10698%09%23FFFFFF,red/K10687%09%23FFFFFF,red/K10054%09%23FFFFFF,red/K03362%09%23FFFFFF,red/K10260%09%23FFFFFF,green/K03869%09%23FFFFFF,red/K10614%09%23FFFFFF,green/K10456%09%23FFFFFF,red/K16060%09%23FFFFF…
mmu04070	Phosphatidylinositol signaling system	Environmental Information Processing	Signal transduction	17	15	32	96	0.024189	0.0656856	ENSMUSG00000022973(Synj1),ENSMUSG00000028698(Pik3r3),ENSMUSG00000028126(Pip5k1a),ENSMUSG00000034731(Dgkh),ENSMUSG00000001175(Calm1),ENSMUSG00000024960(Plcb3),ENSMUSG00000052889(Prkcb),ENSMUSG00000003752(Itpkc),ENSMUSG00000021987(Mtmr6),ENSMUSG00000029186(Pi4k2b),ENSMUSG00000040648(Ppip5k2),ENSMUSG00000039936(Pik3cd),ENSMUSG00000030269(Mtmr14),ENSMUSG00000041417(Pik3r1),ENSMUSG00000039431(Mtmr7),E…	ENSMUSG00000031834(Pik3r2),ENSMUSG00000040061(Plcb2),ENSMUSG00000040479(Dgkz),ENSMUSG00000026288(Inpp5d),ENSMUSG00000028221(Pip4p2),ENSMUSG00000042644(Itpr3),ENSMUSG00000022861(Dgkg),ENSMUSG00000024525(Impa2),ENSMUSG00000026925(Inpp5e),ENSMUSG00000033526(Ppip5k1),ENSMUSG00000016933(Plcg1),ENSMUSG00000023805(Synj2),ENSMUSG00000026102(Inpp1),ENSMUSG00000032594(Ip6k1),ENSMUSG00000042105(Inpp5f)	http://www.kegg.jp/kegg-bin/show_pathway?map04070/K21798%09%23FFFFFF,green/K20279%09%23FFFFFF,purple/K00889%09%23FFFFFF,red/K04960%09%23FFFFFF,green/K00922%09%23FFFFFF,red/K13084%09%23FFFFFF,green/K19662%09%23FFFFFF,red/K01107%09%23FFFFFF,green/K01116%09%23FFFFFF,green/K20278%09%23FFFFFF,green/K13024%09%23FFFFFF,purple/K01092%09%23FFFFFF,green/K07756%09%23FFFFFF,green/K03084%09%23FFFFFF,green/K13…
mmu05225	Hepatocellular carcinoma	Human Diseases	Cancers: Specific types	27	25	52	169	0.0261508	0.0704061	ENSMUSG00000024241(Sos1),ENSMUSG00000009376(Met),ENSMUSG00000039936(Pik3cd),ENSMUSG00000033227(Wnt6),ENSMUSG00000015312(Gadd45b),ENSMUSG00000041417(Pik3r1),ENSMUSG00000020250(Txnrd1),ENSMUSG00000040274(Cdk6),ENSMUSG00000044674(Fzd1),ENSMUSG00000028698(Pik3r3),ENSMUSG00000016477(E2f3),ENSMUSG00000004936(Map2k1),ENSMUSG00000045005(Fzd5),ENSMUSG00000020122(Egfr),ENSMUSG00000015839(Nfe2l2),ENSMUSG000…	ENSMUSG00000006728(Cdk4),ENSMUSG00000035109(Shc4),ENSMUSG00000016933(Plcg1),ENSMUSG00000024913(Lrp5),ENSMUSG00000001665(Gstt3),ENSMUSG00000031834(Pik3r2),ENSMUSG00000021668(Polk),ENSMUSG00000028864(Hgf),ENSMUSG00000007613(Tgfbr1),ENSMUSG00000002109(Ddb2),ENSMUSG00000067199(Frat1),ENSMUSG00000021453(Gadd45g),ENSMUSG00000031714(Gab1),ENSMUSG00000021253(Tgfb3),ENSMUSG00000033318(Gstt2),ENSMUSG000000…	http://www.kegg.jp/kegg-bin/show_pathway?map05225/K03069%09%23FFFFFF,green/K02089%09%23FFFFFF,green/K14021%09%23FFFFFF,red/K02091%09%23FFFFFF,red/K06625%09%23FFFFFF,red/K06620%09%23FFFFFF,red/K05460%09%23FFFFFF,green/K10140%09%23FFFFFF,green/K08957%09%23FFFFFF,red/K04377%09%23FFFFFF,red/K00922%09%23FFFFFF,red/K05638%09%23FFFFFF,red/K04365%09%23FFFFFF,red/K00799%09%23FFFFFF,purple/K11651%09%23FFFF…
mmu04140	Autophagy - animal	Cellular Processes	Transport and catabolism	19	22	41	129	0.0268023	0.0712021	ENSMUSG00000028698(Pik3r3),ENSMUSG00000021116(Eif2s1),ENSMUSG00000039936(Pik3cd),ENSMUSG00000021109(Hif1a),ENSMUSG00000026031(Cflar),ENSMUSG00000041417(Pik3r1),ENSMUSG00000030269(Mtmr14),ENSMUSG00000020349(Ppp2ca),ENSMUSG00000018171(Vmp1),ENSMUSG00000021936(Mapk8),ENSMUSG00000037062(Sh3glb1),ENSMUSG00000009630(Ppp2cb),ENSMUSG00000028945(Rheb),ENSMUSG00000055723(Rras2),ENSMUSG00000021948(Prkcd),EN…	ENSMUSG00000022419(Deptor),ENSMUSG00000031834(Pik3r2),ENSMUSG00000029512(Ulk1),ENSMUSG00000041341(Atg2b),ENSMUSG00000030314(Atg7),ENSMUSG00000024773(Atg2a),ENSMUSG00000041895(Wipi1),ENSMUSG00000028550(Atg4c),ENSMUSG00000041658(Rragb),ENSMUSG00000028278(Rragd),ENSMUSG00000035629(Rubcn),ENSMUSG00000055980(Irs1),ENSMUSG00000038894(Irs2),ENSMUSG00000052688(Rab7b),ENSMUSG00000005102(Eif2ak4),ENSMUSG00…	http://www.kegg.jp/kegg-bin/show_pathway?map04140/K07208%09%23FFFFFF,red/K08337%09%23FFFFFF,green/K08860%09%23FFFFFF,green/K08491%09%23FFFFFF,green/K16185%09%23FFFFFF,green/K21249%09%23FFFFFF,green/K08342%09%23FFFFFF,green/K21357%09%23FFFFFF,green/K02649%09%23FFFFFF,purple/K20402%09%23FFFFFF,green/K04345%09%23FFFFFF,green/K17889%09%23FFFFFF,green/K15464%09%23FFFFFF,red/K08331%09%23FFFFFF,green/K0…
mmu04923	Regulation of lipolysis in adipocytes	Organismal Systems	Endocrine system	7	13	20	55	0.0268986	0.0712021	ENSMUSG00000032487(Ptgs2),ENSMUSG00000028698(Pik3r3),ENSMUSG00000003123(Lipe),ENSMUSG00000039936(Pik3cd),ENSMUSG00000000001(Gnai3),ENSMUSG00000041417(Pik3r1),ENSMUSG00000060675(Plaat3)	ENSMUSG00000038894(Irs2),ENSMUSG00000031834(Pik3r2),ENSMUSG00000020654(Adcy3),ENSMUSG00000005534(Insr),ENSMUSG00000027931(Npr1),ENSMUSG00000025509(Pnpla2),ENSMUSG00000055980(Irs1),ENSMUSG00000030671(Pde3b),ENSMUSG00000047250(Ptgs1),ENSMUSG00000062515(Fabp4),ENSMUSG00000031659(Adcy7),ENSMUSG00000005469(Prkaca),ENSMUSG00000005580(Adcy9)	http://www.kegg.jp/kegg-bin/show_pathway?map04923/K16817%09%23FFFFFF,red/K00509%09%23FFFFFF,green/K04630%09%23FFFFFF,red/K12323%09%23FFFFFF,green/K08753%09%23FFFFFF,green/K08047%09%23FFFFFF,green/K16816%09%23FFFFFF,green/K02649%09%23FFFFFF,purple/K00922%09%23FFFFFF,red/K08043%09%23FFFFFF,green/K07187%09%23FFFFFF,green/K08049%09%23FFFFFF,green/K04527%09%23FFFFFF,green/K11987%09%23FFFFFF,red/K16172…
mmu00533	Glycosaminoglycan biosynthesis - keratan sulfate	Metabolism	Glycan biosynthesis and metabolism	4	3	7	14	0.0309758	0.0813114	ENSMUSG00000051650(B3gnt2),ENSMUSG00000028538(St3gal3),ENSMUSG00000013846(St3gal1),ENSMUSG00000021065(Fut8)	ENSMUSG00000028413(B4galt1),ENSMUSG00000079445(B3gnt7),ENSMUSG00000022793(B4galt4)	http://www.kegg.jp/kegg-bin/show_pathway?map00533/K09664%09%23FFFFFF,green/K00741%09%23FFFFFF,red/K00780%09%23FFFFFF,red/K07966%09%23FFFFFF,green/K00717%09%23FFFFFF,red/K00781%09%23FFFFFF,red/K07969%09%23FFFFFF,green/
mmu02010	ABC transporters	Environmental Information Processing	Membrane transport	6	12	18	49	0.0313155	0.0815239	ENSMUSG00000023088(Abcc1),ENSMUSG00000022822(Abcc5),ENSMUSG00000037321(Tap1),ENSMUSG00000024339(Tap2),ENSMUSG00000032849(Abcc4),ENSMUSG00000004668(Abca13)	ENSMUSG00000031378(Abcd1),ENSMUSG00000032842(Abcc10),ENSMUSG00000055782(Abcd2),ENSMUSG00000018800(Abca5),ENSMUSG00000020865(Abcc3),ENSMUSG00000028973(Abcb8),ENSMUSG00000024030(Abcg1),ENSMUSG00000029408(Abcb9),ENSMUSG00000021240(Abcd4),ENSMUSG00000026944(Abca2),ENSMUSG00000020620(Abca8b),ENSMUSG00000029299(Abcg3)	http://www.kegg.jp/kegg-bin/show_pathway?map02010/K05676%09%23FFFFFF,green/K05650%09%23FFFFFF,green/K05678%09%23FFFFFF,green/K05653%09%23FFFFFF,red/K05665%09%23FFFFFF,red/K05679%09%23FFFFFF,green/K05654%09%23FFFFFF,red/K05668%09%23FFFFFF,red/K05675%09%23FFFFFF,green/K05667%09%23FFFFFF,green/K05656%09%23FFFFFF,green/K05655%09%23FFFFFF,green/K05642%09%23FFFFFF,green/K05648%09%23FFFFFF,green/K05682%…
mmu04360	Axon guidance	Organismal Systems	Development	31	22	53	175	0.0332903	0.0859545	ENSMUSG00000026235(Epha4),ENSMUSG00000024290(Rock1),ENSMUSG00000022048(Dpysl2),ENSMUSG00000032475(Nck1),ENSMUSG00000052516(Robo2),ENSMUSG00000026425(Srgap2),ENSMUSG00000021904(Sema3g),ENSMUSG00000028064(Sema4a),ENSMUSG00000020580(Rock2),ENSMUSG00000001300(Efnb2),ENSMUSG00000041417(Pik3r1),ENSMUSG00000028289(Epha7),ENSMUSG00000000001(Gnai3),ENSMUSG00000020121(Srgap1),ENSMUSG00000022781(Pak2),ENSMU…	ENSMUSG00000041845(Rhod),ENSMUSG00000031385(Plxnb3),ENSMUSG00000031217(Efnb1),ENSMUSG00000030257(Srgap3),ENSMUSG00000031398(Plxna3),ENSMUSG00000045382(Cxcr4),ENSMUSG00000027544(Nfatc2),ENSMUSG00000001227(Sema6b),ENSMUSG00000001761(Smo),ENSMUSG00000029869(Ephb6),ENSMUSG00000037926(Ssh2),ENSMUSG00000005699(Pard6a),ENSMUSG00000025020(Slit1),ENSMUSG00000026842(Abl1),ENSMUSG00000031834(Pik3r2),ENSMUSG…	http://www.kegg.jp/kegg-bin/show_pathway?map04360/K06840%09%23FFFFFF,red/K05463%09%23FFFFFF,purple/K05462%09%23FFFFFF,red/K05108%09%23FFFFFF,red/K07526%09%23FFFFFF,purple/K05744%09%23FFFFFF,green/K07365%09%23FFFFFF,red/K07293%09%23FFFFFF,red/K05766%09%23FFFFFF,green/K16359%09%23FFFFFF,red/K05105%09%23FFFFFF,red/K07524%09%23FFFFFF,red/K06842%09%23FFFFFF,green/K07530%09%23FFFFFF,green/K01116%09%23F…
mmu05224	Breast cancer	Human Diseases	Cancers: Specific types	22	23	45	147	0.0395389	0.101258	ENSMUSG00000024241(Sos1),ENSMUSG00000033227(Wnt6),ENSMUSG00000028698(Pik3r3),ENSMUSG00000044674(Fzd1),ENSMUSG00000040274(Cdk6),ENSMUSG00000016477(E2f3),ENSMUSG00000004936(Map2k1),ENSMUSG00000025225(Nfkb2),ENSMUSG00000022346(Myc),ENSMUSG00000023067(Cdkn1a),ENSMUSG00000057789(Bak1),ENSMUSG00000002413(Braf),ENSMUSG00000014773(Dll1),ENSMUSG00000039936(Pik3cd),ENSMUSG00000015312(Gadd45b),ENSMUSG000000…	ENSMUSG00000035109(Shc4),ENSMUSG00000052684(Jun),ENSMUSG00000020647(Ncoa1),ENSMUSG00000031834(Pik3r2),ENSMUSG00000021668(Polk),ENSMUSG00000018983(E2f2),ENSMUSG00000022105(Rb1),ENSMUSG00000031565(Fgfr1),ENSMUSG00000021250(Fos),ENSMUSG00000041147(Brca2),ENSMUSG00000020888(Dvl2),ENSMUSG00000070348(Ccnd1),ENSMUSG00000006728(Cdk4),ENSMUSG00000040289(Hey1),ENSMUSG00000024913(Lrp5),ENSMUSG00000002109(Dd…	http://www.kegg.jp/kegg-bin/show_pathway?map05224/K17447%09%23FFFFFF,green/K04377%09%23FFFFFF,red/K09389%09%23FFFFFF,green/K00922%09%23FFFFFF,red/K03069%09%23FFFFFF,green/K04503%09%23FFFFFF,green/K09091%09%23FFFFFF,green/K04362%09%23FFFFFF,green/K06620%09%23FFFFFF,red/K04361%09%23FFFFFF,red/K02089%09%23FFFFFF,green/K04379%09%23FFFFFF,green/K00445%09%23FFFFFF,red/K17449%09%23FFFFFF,green/K03511%09…
mmu04392	Hippo signaling pathway - multiple species	Environmental Information Processing	Signal transduction	6	5	11	27	0.0402355	0.102211	ENSMUSG00000006262(Mob1b),ENSMUSG00000043131(Mob1a),ENSMUSG00000042129(Rassf4),ENSMUSG00000021067(Sav1),ENSMUSG00000040021(Lats1),ENSMUSG00000022329(Stk3)	ENSMUSG00000018849(Wwc1),ENSMUSG00000036862(Dchs1),ENSMUSG00000027339(Rassf2),ENSMUSG00000022433(Csnk1e),ENSMUSG00000022178(Ajuba)	http://www.kegg.jp/kegg-bin/show_pathway?map04392/K16507%09%23FFFFFF,green/K16686%09%23FFFFFF,red/K16682%09%23FFFFFF,green/K16685%09%23FFFFFF,green/K09851%09%23FFFFFF,purple/K08960%09%23FFFFFF,green/K08791%09%23FFFFFF,red/K06685%09%23FFFFFF,red/K04412%09%23FFFFFF,red/
mmu04921	Oxytocin signaling pathway	Organismal Systems	Endocrine system	28	18	46	151	0.040822	0.102871	ENSMUSG00000046207(Pik3r6),ENSMUSG00000053819(Camk2d),ENSMUSG00000027646(Src),ENSMUSG00000053395(Cacng8),ENSMUSG00000029084(Cd38),ENSMUSG00000000001(Gnai3),ENSMUSG00000022092(Ppp3cc),ENSMUSG00000032487(Ptgs2),ENSMUSG00000019907(Ppp1r12a),ENSMUSG00000056220(Pla2g4a),ENSMUSG00000014956(Ppp1cb),ENSMUSG00000078815(Cacng6),ENSMUSG00000052889(Prkcb),ENSMUSG00000033847(Pla2g4c),ENSMUSG00000024960(Plcb3)…	ENSMUSG00000021820(Camk2g),ENSMUSG00000040061(Plcb2),ENSMUSG00000028944(Prkag2),ENSMUSG00000052684(Jun),ENSMUSG00000035064(Eef2k),ENSMUSG00000027931(Npr1),ENSMUSG00000070348(Ccnd1),ENSMUSG00000005580(Adcy9),ENSMUSG00000042644(Itpr3),ENSMUSG00000027544(Nfatc2),ENSMUSG00000021250(Fos),ENSMUSG00000030272(Camk1),ENSMUSG00000020654(Adcy3),ENSMUSG00000005469(Prkaca),ENSMUSG00000031659(Adcy7),ENSMUSG000…	http://www.kegg.jp/kegg-bin/show_pathway?map04921/K05692%09%23FFFFFF,red/K04873%09%23FFFFFF,red/K04960%09%23FFFFFF,green/K06269%09%23FFFFFF,red/K08794%09%23FFFFFF,green/K07200%09%23FFFFFF,green/K04503%09%23FFFFFF,green/K02183%09%23FFFFFF,red/K21289%09%23FFFFFF,red/K07359%09%23FFFFFF,red/K04345%09%23FFFFFF,green/K04379%09%23FFFFFF,green/K01242%09%23FFFFFF,red/K17332%09%23FFFFFF,green/K05858%09%23F…
mmu00920	Sulfur metabolism	Metabolism	Energy metabolism	1	4	5	9	0.0415414	0.103853	ENSMUSG00000005803(Sqor)	ENSMUSG00000044986(Tst),ENSMUSG00000049858(Suox),ENSMUSG00000071711(Mpst),ENSMUSG00000064254(Ethe1)	http://www.kegg.jp/kegg-bin/show_pathway?map00920/K17725%09%23FFFFFF,green/K22470%09%23FFFFFF,red/K01011%09%23FFFFFF,green/K00387%09%23FFFFFF,green/
mmu04910	Insulin signaling pathway	Organismal Systems	Endocrine system	23	19	42	137	0.0444722	0.110305	ENSMUSG00000028945(Rheb),ENSMUSG00000028156(Eif4e),ENSMUSG00000027540(Ptpn1),ENSMUSG00000053113(Socs3),ENSMUSG00000005057(Sh2b2),ENSMUSG00000039936(Pik3cd),ENSMUSG00000041417(Pik3r1),ENSMUSG00000017776(Crk),ENSMUSG00000000628(Hk2),ENSMUSG00000014956(Ppp1cb),ENSMUSG00000024241(Sos1),ENSMUSG00000024143(Rhoq),ENSMUSG00000019487(Trip10),ENSMUSG00000021936(Mapk8),ENSMUSG00000002997(Prkar2b),ENSMUSG000…	ENSMUSG00000020027(Socs2),ENSMUSG00000055980(Irs1),ENSMUSG00000028944(Prkag2),ENSMUSG00000040618(Pck2),ENSMUSG00000031295(Phka2),ENSMUSG00000030671(Pde3b),ENSMUSG00000049999(Ppp1r3d),ENSMUSG00000005469(Prkaca),ENSMUSG00000020312(Shc2),ENSMUSG00000020190(Mknk2),ENSMUSG00000038894(Irs2),ENSMUSG00000044167(Foxo1),ENSMUSG00000035109(Shc4),ENSMUSG00000034055(Phka1),ENSMUSG00000031834(Pik3r2),ENSMUSG00…	http://www.kegg.jp/kegg-bin/show_pathway?map04910/K05695%09%23FFFFFF,red/K07193%09%23FFFFFF,red/K04372%09%23FFFFFF,green/K07190%09%23FFFFFF,green/K04438%09%23FFFFFF,red/K00844%09%23FFFFFF,red/K17449%09%23FFFFFF,green/K04739%09%23FFFFFF,red/K04695%09%23FFFFFF,green/K07189%09%23FFFFFF,green/K02649%09%23FFFFFF,purple/K03259%09%23FFFFFF,red/K02183%09%23FFFFFF,red/K04440%09%23FFFFFF,red/K00922%09%23FF…
mmu05100	Bacterial invasion of epithelial cells	Human Diseases	Infectious diseases: Bacterial	18	6	24	72	0.0463624	0.114095	ENSMUSG00000073982(Rhog),ENSMUSG00000061665(Cd2ap),ENSMUSG00000062825(Actg1),ENSMUSG00000029580(Actb),ENSMUSG00000006134(Crkl),ENSMUSG00000000555(Itga5),ENSMUSG00000017776(Crk),ENSMUSG00000007655(Cav1),ENSMUSG00000022831(Hcls1),ENSMUSG00000058013(Septin11),ENSMUSG00000028698(Pik3r3),ENSMUSG00000027646(Src),ENSMUSG00000025809(Itgb1),ENSMUSG00000039936(Pik3cd),ENSMUSG00000041417(Pik3r1),ENSMUSG0000…	ENSMUSG00000020312(Shc2),ENSMUSG00000031714(Gab1),ENSMUSG00000031834(Pik3r2),ENSMUSG00000035109(Shc4),ENSMUSG00000018398(Septin8),ENSMUSG00000017670(Elmo2)	http://www.kegg.jp/kegg-bin/show_pathway?map05100/K05700%09%23FFFFFF,red/K05692%09%23FFFFFF,red/K02649%09%23FFFFFF,purple/K06484%09%23FFFFFF,red/K13738%09%23FFFFFF,red/K17447%09%23FFFFFF,green/K00922%09%23FFFFFF,red/K07863%09%23FFFFFF,red/K09593%09%23FFFFFF,green/K18985%09%23FFFFFF,green/K06278%09%23FFFFFF,red/K06106%09%23FFFFFF,red/K04438%09%23FFFFFF,red/K05704%09%23FFFFFF,red/K05719%09%23FFFFFF…
mmu05213	Endometrial cancer	Human Diseases	Cancers: Specific types	11	9	20	58	0.0468355	0.114336	ENSMUSG00000024241(Sos1),ENSMUSG00000039936(Pik3cd),ENSMUSG00000041417(Pik3r1),ENSMUSG00000015312(Gadd45b),ENSMUSG00000028698(Pik3r3),ENSMUSG00000004936(Map2k1),ENSMUSG00000020122(Egfr),ENSMUSG00000022346(Myc),ENSMUSG00000023067(Cdkn1a),ENSMUSG00000057789(Bak1),ENSMUSG00000002413(Braf)	ENSMUSG00000021668(Polk),ENSMUSG00000031834(Pik3r2),ENSMUSG00000002109(Ddb2),ENSMUSG00000021453(Gadd45g),ENSMUSG00000028914(Casp9),ENSMUSG00000048756(Foxo3),ENSMUSG00000028017(Egf),ENSMUSG00000032498(Mlh1),ENSMUSG00000070348(Ccnd1)	http://www.kegg.jp/kegg-bin/show_pathway?map05213/K04377%09%23FFFFFF,red/K04402%09%23FFFFFF,purple/K04357%09%23FFFFFF,green/K04368%09%23FFFFFF,red/K10140%09%23FFFFFF,green/K00922%09%23FFFFFF,red/K04399%09%23FFFFFF,green/K06625%09%23FFFFFF,red/K04365%09%23FFFFFF,red/K04503%09%23FFFFFF,green/K09408%09%23FFFFFF,green/K02649%09%23FFFFFF,purple/K08734%09%23FFFFFF,green/K03511%09%23FFFFFF,green/K14021%…
mmu04211	Longevity regulating pathway	Organismal Systems	Aging	11	18	29	90	0.0471863	0.114336	ENSMUSG00000040760(Appl1),ENSMUSG00000006818(Sod2),ENSMUSG00000028163(Nfkb1),ENSMUSG00000028698(Pik3r3),ENSMUSG00000029471(Camkk2),ENSMUSG00000053007(Creb5),ENSMUSG00000024927(Rela),ENSMUSG00000028945(Rheb),ENSMUSG00000028156(Eif4e),ENSMUSG00000039936(Pik3cd),ENSMUSG00000041417(Pik3r1)	ENSMUSG00000020654(Adcy3),ENSMUSG00000048756(Foxo3),ENSMUSG00000005534(Insr),ENSMUSG00000038332(Sesn1),ENSMUSG00000044167(Foxo1),ENSMUSG00000038894(Irs2),ENSMUSG00000038648(Creb3l2),ENSMUSG00000031834(Pik3r2),ENSMUSG00000029512(Ulk1),ENSMUSG00000005469(Prkaca),ENSMUSG00000031659(Adcy7),ENSMUSG00000027244(Atg13),ENSMUSG00000036893(Ehmt1),ENSMUSG00000005580(Adcy9),ENSMUSG00000055980(Irs1),ENSMUSG00…	http://www.kegg.jp/kegg-bin/show_pathway?map04211/K09048%09%23FFFFFF,green/K09408%09%23FFFFFF,green/K02580%09%23FFFFFF,red/K04527%09%23FFFFFF,green/K20394%09%23FFFFFF,green/K07200%09%23FFFFFF,green/K00922%09%23FFFFFF,red/K11420%09%23FFFFFF,green/K04564%09%23FFFFFF,red/K07208%09%23FFFFFF,red/K09047%09%23FFFFFF,red/K04735%09%23FFFFFF,red/K07359%09%23FFFFFF,red/K08733%09%23FFFFFF,red/K07187%09%23FFF…
mmu05320	Autoimmune thyroid disease	Human Diseases	Immune diseases	21	2	23	69	0.0503944	0.121177	ENSMUSG00000075122(Cd80),ENSMUSG00000016283(H2-M2),ENSMUSG00000041538(H2-Ob),ENSMUSG00000017652(Cd40),ENSMUSG00000024334(H2-Oa),ENSMUSG00000037649(H2-DMa),ENSMUSG00000073421(H2-Ab1),ENSMUSG00000056116(H2-T22),ENSMUSG00000024778(Fas),ENSMUSG00000035929(H2-Q4),ENSMUSG00000036594(H2-Aa),ENSMUSG00000092243(Gm7030),ENSMUSG00000016529(Il10),ENSMUSG00000060586(H2-Eb1),ENSMUSG00000061232(H2-K1),ENSMUSG00…	ENSMUSG00000026012(Cd28),ENSMUSG00000000869(Il4)	http://www.kegg.jp/kegg-bin/show_pathway?map05320/K06751%09%23FFFFFF,red/K05412%09%23FFFFFF,red/K06470%09%23FFFFFF,green/K05430%09%23FFFFFF,green/K06752%09%23FFFFFF,red/K05413%09%23FFFFFF,red/K05443%09%23FFFFFF,red/K01353%09%23FFFFFF,red/K04390%09%23FFFFFF,red/K03160%09%23FFFFFF,red/
mmu05231	Choline metabolism in cancer	Human Diseases	Cancers: Overview	19	12	31	98	0.0520771	0.124275	ENSMUSG00000004936(Map2k1),ENSMUSG00000026821(Ralgds),ENSMUSG00000052889(Prkcb),ENSMUSG00000033847(Pla2g4c),ENSMUSG00000056220(Pla2g4a),ENSMUSG00000024241(Sos1),ENSMUSG00000021936(Mapk8),ENSMUSG00000034731(Dgkh),ENSMUSG00000028698(Pik3r3),ENSMUSG00000028126(Pip5k1a),ENSMUSG00000020122(Egfr),ENSMUSG00000021759(Plpp1),ENSMUSG00000028945(Rheb),ENSMUSG00000024620(Pdgfrb),ENSMUSG00000028412(Slc44a1),E…	ENSMUSG00000035246(Pcyt1b),ENSMUSG00000021250(Fos),ENSMUSG00000025856(Pdgfa),ENSMUSG00000022861(Dgkg),ENSMUSG00000052684(Jun),ENSMUSG00000020334(Slc22a4),ENSMUSG00000040479(Dgkz),ENSMUSG00000031834(Pik3r2),ENSMUSG00000005615(Pcyt1a),ENSMUSG00000028017(Egf),ENSMUSG00000016933(Plcg1),ENSMUSG00000028019(Pdgfc)	http://www.kegg.jp/kegg-bin/show_pathway?map05231/K01116%09%23FFFFFF,green/K04379%09%23FFFFFF,green/K03099%09%23FFFFFF,red/K08732%09%23FFFFFF,red/K02649%09%23FFFFFF,purple/K06515%09%23FFFFFF,red/K00889%09%23FFFFFF,red/K08202%09%23FFFFFF,green/K04440%09%23FFFFFF,red/K01080%09%23FFFFFF,red/K00901%09%23FFFFFF,purple/K07860%09%23FFFFFF,red/K05450%09%23FFFFFF,green/K04357%09%23FFFFFF,green/K19662%09%2…
mmu04664	Fc epsilon RI signaling pathway	Organismal Systems	Immune system	17	5	22	66	0.0548092	0.129811	ENSMUSG00000024401(Tnf),ENSMUSG00000028698(Pik3r3),ENSMUSG00000033352(Map2k4),ENSMUSG00000021936(Mapk8),ENSMUSG00000024241(Sos1),ENSMUSG00000056220(Pla2g4a),ENSMUSG00000018916(Csf2),ENSMUSG00000033847(Pla2g4c),ENSMUSG00000058715(Fcer1g),ENSMUSG00000004936(Map2k1),ENSMUSG00000002699(Lcp2),ENSMUSG00000041417(Pik3r1),ENSMUSG00000039936(Pik3cd),ENSMUSG00000033220(Rac2),ENSMUSG00000053137(Mapk11),ENSM…	ENSMUSG00000026288(Inpp5d),ENSMUSG00000031834(Pik3r2),ENSMUSG00000009621(Vav2),ENSMUSG00000000869(Il4),ENSMUSG00000016933(Plcg1)	http://www.kegg.jp/kegg-bin/show_pathway?map04664/K16342%09%23FFFFFF,red/K04440%09%23FFFFFF,red/K05427%09%23FFFFFF,red/K02649%09%23FFFFFF,purple/K03156%09%23FFFFFF,red/K05855%09%23FFFFFF,red/K05430%09%23FFFFFF,green/K03099%09%23FFFFFF,red/K07361%09%23FFFFFF,red/K01116%09%23FFFFFF,green/K00922%09%23FFFFFF,red/K07860%09%23FFFFFF,red/K04441%09%23FFFFFF,red/K04368%09%23FFFFFF,red/K05730%09%23FFFFFF,g…
mmu00514	Other types of O-glycan biosynthesis	Metabolism	Glycan biosynthesis and metabolism	2	7	9	22	0.059474	0.139808	ENSMUSG00000028538(St3gal3),ENSMUSG00000020260(Pofut2)	ENSMUSG00000034126(Pomt2),ENSMUSG00000022885(St6gal1),ENSMUSG00000025158(Rfng),ENSMUSG00000028413(B4galt1),ENSMUSG00000051950(B3glct),ENSMUSG00000039254(Pomt1),ENSMUSG00000029570(Lfng)	http://www.kegg.jp/kegg-bin/show_pathway?map00514/K05948%09%23FFFFFF,green/K07966%09%23FFFFFF,green/K00728%09%23FFFFFF,green/K03691%09%23FFFFFF,red/K13675%09%23FFFFFF,green/K00778%09%23FFFFFF,green/K00781%09%23FFFFFF,red/
mmu00240	Pyrimidine metabolism	Metabolism	Nucleotide metabolism	6	13	19	56	0.060293	0.140684	ENSMUSG00000020407(Upp1),ENSMUSG00000054958(Nt5c1a),ENSMUSG00000068417(Pnp2),ENSMUSG00000020638(Cmpk2),ENSMUSG00000029366(Dck),ENSMUSG00000115338(Pnp)	ENSMUSG00000042462(Dctpp1),ENSMUSG00000037370(Enpp1),ENSMUSG00000031562(Dctd),ENSMUSG00000030978(Rrm1),ENSMUSG00000026575(Nme7),ENSMUSG00000027203(Dut),ENSMUSG00000022814(Umps),ENSMUSG00000033068(Entpd6),ENSMUSG00000024177(Nme4),ENSMUSG00000021236(Entpd5),ENSMUSG00000035824(Tk2),ENSMUSG00000025041(Nt5c2),ENSMUSG00000048120(Entpd1)	http://www.kegg.jp/kegg-bin/show_pathway?map00240/K16904%09%23FFFFFF,green/K00940%09%23FFFFFF,green/K00893%09%23FFFFFF,red/K01510%09%23FFFFFF,green/K03783%09%23FFFFFF,red/K10807%09%23FFFFFF,green/K01081%09%23FFFFFF,purple/K01513%09%23FFFFFF,green/K01511%09%23FFFFFF,green/K00757%09%23FFFFFF,red/K01520%09%23FFFFFF,green/K01493%09%23FFFFFF,green/K00857%09%23FFFFFF,green/K13421%09%23FFFFFF,green/K138…
mmu04310	Wnt signaling pathway	Environmental Information Processing	Signal transduction	24	22	46	155	0.0609709	0.141219	ENSMUSG00000022346(Myc),ENSMUSG00000020271(Fbxw11),ENSMUSG00000024960(Plcb3),ENSMUSG00000046707(Csnk2a2),ENSMUSG00000024642(Tle4),ENSMUSG00000052889(Prkcb),ENSMUSG00000024576(Csnk1a1),ENSMUSG00000045005(Fzd5),ENSMUSG00000020580(Rock2),ENSMUSG00000034574(Daam1),ENSMUSG00000024912(Fosl1),ENSMUSG00000014226(Cacybp),ENSMUSG00000033220(Rac2),ENSMUSG00000036158(Prickle1),ENSMUSG00000033227(Wnt6),ENSMUS…	ENSMUSG00000027860(Vangl1),ENSMUSG00000047604(Frat2),ENSMUSG00000027544(Nfatc2),ENSMUSG00000020888(Dvl2),ENSMUSG00000034771(Tle2),ENSMUSG00000031169(Porcn),ENSMUSG00000024232(Bambi),ENSMUSG00000070348(Ccnd1),ENSMUSG00000067199(Frat1),ENSMUSG00000028988(Ctnnbip1),ENSMUSG00000005469(Prkaca),ENSMUSG00000034758(Tle6),ENSMUSG00000033016(Nfatc1),ENSMUSG00000030020(Prickle2),ENSMUSG00000024913(Lrp5),ENS…	http://www.kegg.jp/kegg-bin/show_pathway?map04310/K03068%09%23FFFFFF,green/K10162%09%23FFFFFF,green/K04508%09%23FFFFFF,purple/K04440%09%23FFFFFF,red/K04502%09%23FFFFFF,red/K04345%09%23FFFFFF,green/K02165%09%23FFFFFF,green/K02375%09%23FFFFFF,red/K04512%09%23FFFFFF,red/K04511%09%23FFFFFF,purple/K17332%09%23FFFFFF,green/K03069%09%23FFFFFF,green/K17388%09%23FFFFFF,red/K08957%09%23FFFFFF,red/K04446%09…
mmu03008	Ribosome biogenesis in eukaryotes	Genetic Information Processing	Translation	23	2	25	78	0.0656031	0.150839	ENSMUSG00000021149(Gtpbp4),ENSMUSG00000032410(Xrn1),ENSMUSG00000029430(Ran),ENSMUSG00000010097(Nxf1),ENSMUSG00000026020(Nop58),ENSMUSG00000027613(Eif6),ENSMUSG00000063480(Snu13),ENSMUSG00000021243(Fcf1),ENSMUSG00000024785(Rcl1),ENSMUSG00000018040(Rrp7a),ENSMUSG00000032834(Pwp2),ENSMUSG00000030423(Pop4),ENSMUSG00000032026(Rexo2),ENSMUSG00000041057(Wdr43),ENSMUSG00000046707(Csnk2a2),ENSMUSG00000027…	ENSMUSG00000060152(Pop5),ENSMUSG00000032288(Imp3)	http://www.kegg.jp/kegg-bin/show_pathway?map03008/K03097%09%23FFFFFF,red/K14562%09%23FFFFFF,red/K11128%09%23FFFFFF,red/K14284%09%23FFFFFF,red/K07562%09%23FFFFFF,red/K13288%09%23FFFFFF,red/K03264%09%23FFFFFF,red/K07936%09%23FFFFFF,red/K14560%09%23FFFFFF,green/K03538%09%23FFFFFF,red/K14559%09%23FFFFFF,red/K12619%09%23FFFFFF,red/K14527%09%23FFFFFF,red/K11108%09%23FFFFFF,red/K14572%09%23FFFFFF,red/K0…
mmu00230	Purine metabolism	Metabolism	Nucleotide metabolism	13	27	40	134	0.0706128	0.161181	ENSMUSG00000028792(Ak2),ENSMUSG00000030653(Gm45837),ENSMUSG00000028525(Pde4b),ENSMUSG00000023868(Pde10a),ENSMUSG00000028527(Ak4),ENSMUSG00000054958(Nt5c1a),ENSMUSG00000068417(Pnp2),ENSMUSG00000029310(Nudt9),ENSMUSG00000023961(Enpp4),ENSMUSG00000029366(Dck),ENSMUSG00000005686(Ampd3),ENSMUSG00000025481(Urah),ENSMUSG00000115338(Pnp)	ENSMUSG00000021699(Pde4d),ENSMUSG00000020444(Guk1),ENSMUSG00000004347(Pde1c),ENSMUSG00000031659(Adcy7),ENSMUSG00000037370(Enpp1),ENSMUSG00000031851(Ntpcr),ENSMUSG00000005580(Adcy9),ENSMUSG00000019990(Pde7b),ENSMUSG00000030532(Hddc3),ENSMUSG00000030978(Rrm1),ENSMUSG00000014554(Dguok),ENSMUSG00000017697(Ada),ENSMUSG00000030671(Pde3b),ENSMUSG00000026575(Nme7),ENSMUSG00000032565(Nudt16),ENSMUSG000000…	http://www.kegg.jp/kegg-bin/show_pathway?map00230/K01514%09%23FFFFFF,green/K21138%09%23FFFFFF,green/K00940%09%23FFFFFF,green/K01511%09%23FFFFFF,green/K01513%09%23FFFFFF,green/K00364%09%23FFFFFF,green/K13293%09%23FFFFFF,purple/K01081%09%23FFFFFF,purple/K18283%09%23FFFFFF,red/K08049%09%23FFFFFF,green/K18424%09%23FFFFFF,red/K03783%09%23FFFFFF,red/K01488%09%23FFFFFF,green/K16855%09%23FFFFFF,green/K13…
mmu00601	Glycosphingolipid biosynthesis - lacto and neolacto series	Metabolism	Glycan biosynthesis and metabolism	5	5	10	26	0.0719458	0.163043	ENSMUSG00000021360(Gcnt2),ENSMUSG00000022747(St3gal6),ENSMUSG00000022686(B3gnt5),ENSMUSG00000028538(St3gal3),ENSMUSG00000051650(B3gnt2)	ENSMUSG00000036587(Fut7),ENSMUSG00000022793(B4galt4),ENSMUSG00000074892(B3galt5),ENSMUSG00000028413(B4galt1),ENSMUSG00000031803(B3gnt3)	http://www.kegg.jp/kegg-bin/show_pathway?map00601/K03792%09%23FFFFFF,red/K00741%09%23FFFFFF,red/K07635%09%23FFFFFF,green/K07969%09%23FFFFFF,green/K07970%09%23FFFFFF,green/K03877%09%23FFFFFF,green/K03766%09%23FFFFFF,red/K00742%09%23FFFFFF,red/K07966%09%23FFFFFF,green/K00781%09%23FFFFFF,red/
mmu04912	GnRH signaling pathway	Organismal Systems	Endocrine system	18	10	28	90	0.0750765	0.168922	ENSMUSG00000020122(Egfr),ENSMUSG00000053137(Mapk11),ENSMUSG00000024486(Hbegf),ENSMUSG00000031740(Mmp2),ENSMUSG00000021936(Mapk8),ENSMUSG00000024241(Sos1),ENSMUSG00000056220(Pla2g4a),ENSMUSG00000053819(Camk2d),ENSMUSG00000027646(Src),ENSMUSG00000033352(Map2k4),ENSMUSG00000024639(Gnaq),ENSMUSG00000000957(Mmp14),ENSMUSG00000004936(Map2k1),ENSMUSG00000033847(Pla2g4c),ENSMUSG00000052889(Prkcb),ENSMUSG…	ENSMUSG00000021754(Map3k1),ENSMUSG00000005469(Prkaca),ENSMUSG00000031659(Adcy7),ENSMUSG00000014426(Map3k4),ENSMUSG00000005580(Adcy9),ENSMUSG00000052684(Jun),ENSMUSG00000021820(Camk2g),ENSMUSG00000040061(Plcb2),ENSMUSG00000020654(Adcy3),ENSMUSG00000042644(Itpr3)	http://www.kegg.jp/kegg-bin/show_pathway?map04912/K19662%09%23FFFFFF,red/K16342%09%23FFFFFF,red/K04441%09%23FFFFFF,red/K08043%09%23FFFFFF,green/K04960%09%23FFFFFF,green/K06068%09%23FFFFFF,red/K08047%09%23FFFFFF,green/K04428%09%23FFFFFF,green/K04440%09%23FFFFFF,red/K04345%09%23FFFFFF,green/K07763%09%23FFFFFF,red/K03099%09%23FFFFFF,red/K04448%09%23FFFFFF,green/K04634%09%23FFFFFF,red/K05858%09%23FFF…
mmu05020	Prion diseases	Human Diseases	Neurodegenerative diseases	11	1	12	33	0.0763801	0.170636	ENSMUSG00000024966(Stip1),ENSMUSG00000036905(C1qb),ENSMUSG00000036887(C1qa),ENSMUSG00000027399(Il1a),ENSMUSG00000027398(Il1b),ENSMUSG00000026923(Notch1),ENSMUSG00000004936(Map2k1),ENSMUSG00000025746(Il6),ENSMUSG00000025887(Casp12),ENSMUSG00000026864(Hspa5),ENSMUSG00000035042(Ccl5)	ENSMUSG00000005469(Prkaca)	http://www.kegg.jp/kegg-bin/show_pathway?map05020/K04519%09%23FFFFFF,red/K05405%09%23FFFFFF,red/K03987%09%23FFFFFF,red/K09553%09%23FFFFFF,red/K04345%09%23FFFFFF,green/K04368%09%23FFFFFF,red/K03986%09%23FFFFFF,red/K04741%09%23FFFFFF,red/K02599%09%23FFFFFF,red/K12499%09%23FFFFFF,red/K09490%09%23FFFFFF,red/K04383%09%23FFFFFF,red/
mmu04216	Ferroptosis	Cellular Processes	Cell growth and death	11	3	14	40	0.0781045	0.172326	ENSMUSG00000008892(Vdac3),ENSMUSG00000027737(Slc7a11),ENSMUSG00000005413(Hmox1),ENSMUSG00000027610(Gss),ENSMUSG00000023030(Slc11a2),ENSMUSG00000018796(Acsl1),ENSMUSG00000015340(Cybb),ENSMUSG00000031278(Acsl4),ENSMUSG00000024981(Acsl5),ENSMUSG00000022094(Slc39a14),ENSMUSG00000003617(Cp)	ENSMUSG00000026389(Steap3),ENSMUSG00000030314(Atg7),ENSMUSG00000025993(Slc40a1)	http://www.kegg.jp/kegg-bin/show_pathway?map04216/K14685%09%23FFFFFF,green/K10142%09%23FFFFFF,green/K21398%09%23FFFFFF,red/K21456%09%23FFFFFF,red/K13869%09%23FFFFFF,red/K21421%09%23FFFFFF,red/K00510%09%23FFFFFF,red/K08337%09%23FFFFFF,green/K01897%09%23FFFFFF,red/K15041%09%23FFFFFF,red/K14720%09%23FFFFFF,red/K13624%09%23FFFFFF,red/
mmu05414	Dilated cardiomyopathy (DCM)	Human Diseases	Cardiovascular diseases	16	10	26	83	0.0782305	0.172326	ENSMUSG00000000555(Itga5),ENSMUSG00000029580(Actb),ENSMUSG00000062825(Actg1),ENSMUSG00000003352(Cacnb3),ENSMUSG00000039115(Itga9),ENSMUSG00000025321(Itgb8),ENSMUSG00000027009(Itga4),ENSMUSG00000027940(Tpm3),ENSMUSG00000031799(Tpm4),ENSMUSG00000053395(Cacng8),ENSMUSG00000024401(Tnf),ENSMUSG00000025809(Itgb1),ENSMUSG00000002100(Mybpc3),ENSMUSG00000042284(Itga1),ENSMUSG00000026414(Tnnt2),ENSMUSG0000…	ENSMUSG00000039952(Dag1),ENSMUSG00000005580(Adcy9),ENSMUSG00000021253(Tgfb3),ENSMUSG00000020654(Adcy3),ENSMUSG00000027111(Itga6),ENSMUSG00000005469(Prkaca),ENSMUSG00000031659(Adcy7),ENSMUSG00000022817(Itgb5),ENSMUSG00000035458(Tnni3),ENSMUSG00000020689(Itgb3)	http://www.kegg.jp/kegg-bin/show_pathway?map05414/K13377%09%23FFFFFF,green/K09290%09%23FFFFFF,red/K04871%09%23FFFFFF,red/K06483%09%23FFFFFF,red/K06588%09%23FFFFFF,green/K05692%09%23FFFFFF,red/K04345%09%23FFFFFF,green/K08049%09%23FFFFFF,green/K10375%09%23FFFFFF,red/K06493%09%23FFFFFF,green/K06480%09%23FFFFFF,red/K12045%09%23FFFFFF,red/K06265%09%23FFFFFF,green/K06585%09%23FFFFFF,red/K04864%09%23FFF…
mmu04152	AMPK signaling pathway	Environmental Information Processing	Signal transduction	19	18	37	124	0.0799303	0.174848	ENSMUSG00000040028(Elavl1),ENSMUSG00000041769(Ppp2r2d),ENSMUSG00000020277(Pfkl),ENSMUSG00000053007(Creb5),ENSMUSG00000029471(Camkk2),ENSMUSG00000020349(Ppp2ca),ENSMUSG00000041417(Pik3r1),ENSMUSG00000039936(Pik3cd),ENSMUSG00000021670(Hmgcr),ENSMUSG00000029174(Tbc1d1),ENSMUSG00000028945(Rheb),ENSMUSG00000009630(Ppp2cb),ENSMUSG00000021981(Cab39l),ENSMUSG00000020671(Rab10),ENSMUSG00000003123(Lipe),EN…	ENSMUSG00000045875(Adra1a),ENSMUSG00000000440(Pparg),ENSMUSG00000055980(Irs1),ENSMUSG00000025203(Scd2),ENSMUSG00000028944(Prkag2),ENSMUSG00000040618(Pck2),ENSMUSG00000070348(Ccnd1),ENSMUSG00000042010(Acacb),ENSMUSG00000026409(Pfkfb2),ENSMUSG00000005534(Insr),ENSMUSG00000048756(Foxo3),ENSMUSG00000038648(Creb3l2),ENSMUSG00000074064(Mlycd),ENSMUSG00000029512(Ulk1),ENSMUSG00000031834(Pik3r2),ENSMUSG0…	http://www.kegg.jp/kegg-bin/show_pathway?map04152/K07201%09%23FFFFFF,green/K01946%09%23FFFFFF,green/K07187%09%23FFFFFF,green/K07359%09%23FFFFFF,red/K00021%09%23FFFFFF,red/K04382%09%23FFFFFF,red/K09048%09%23FFFFFF,green/K08292%09%23FFFFFF,green/K04135%09%23FFFFFF,green/K18341%09%23FFFFFF,red/K00507%09%23FFFFFF,green/K00850%09%23FFFFFF,red/K04354%09%23FFFFFF,red/K07208%09%23FFFFFF,red/K07903%09%23F…
mmu04710	Circadian rhythm	Organismal Systems	Environmental adaptation	3	8	11	30	0.0831714	0.180683	ENSMUSG00000020038(Cry1),ENSMUSG00000020271(Fbxw11),ENSMUSG00000022124(Fbxl3)	ENSMUSG00000030256(Bhlhe41),ENSMUSG00000030103(Bhlhe40),ENSMUSG00000026077(Npas2),ENSMUSG00000028957(Per3),ENSMUSG00000020889(Nr1d1),ENSMUSG00000022433(Csnk1e),ENSMUSG00000032238(Rora),ENSMUSG00000028944(Prkag2)	http://www.kegg.jp/kegg-bin/show_pathway?map04710/K08532%09%23FFFFFF,green/K02295%09%23FFFFFF,red/K03362%09%23FFFFFF,red/K08960%09%23FFFFFF,green/K03728%09%23FFFFFF,green/K03730%09%23FFFFFF,green/K21945%09%23FFFFFF,green/K10269%09%23FFFFFF,red/K03729%09%23FFFFFF,green/K09026%09%23FFFFFF,green/K07200%09%23FFFFFF,green/
mmu04213	Longevity regulating pathway - multiple species	Organismal Systems	Aging	7	13	20	62	0.0873933	0.187271	ENSMUSG00000041417(Pik3r1),ENSMUSG00000091971(Hspa1a),ENSMUSG00000028800(Hdac1),ENSMUSG00000028698(Pik3r3),ENSMUSG00000006818(Sod2),ENSMUSG00000039936(Pik3cd),ENSMUSG00000090877(Hspa1b)	ENSMUSG00000005469(Prkaca),ENSMUSG00000005534(Insr),ENSMUSG00000031659(Adcy7),ENSMUSG00000005580(Adcy9),ENSMUSG00000044167(Foxo1),ENSMUSG00000020091(Eif4ebp2),ENSMUSG00000055980(Irs1),ENSMUSG00000059970(Hspa2),ENSMUSG00000048756(Foxo3),ENSMUSG00000031834(Pik3r2),ENSMUSG00000028944(Prkag2),ENSMUSG00000020654(Adcy3),ENSMUSG00000038894(Irs2)	http://www.kegg.jp/kegg-bin/show_pathway?map04213/K18644%09%23FFFFFF,green/K16172%09%23FFFFFF,green/K07200%09%23FFFFFF,green/K04527%09%23FFFFFF,green/K07201%09%23FFFFFF,green/K00922%09%23FFFFFF,red/K06067%09%23FFFFFF,red/K07187%09%23FFFFFF,green/K08049%09%23FFFFFF,green/K03283%09%23FFFFFF,purple/K09408%09%23FFFFFF,green/K04345%09%23FFFFFF,green/K08047%09%23FFFFFF,green/K04564%09%23FFFFFF,red/K026…
mmu05230	Central carbon metabolism in cancer	Human Diseases	Cancers: Overview	17	3	20	62	0.0873933	0.187271	ENSMUSG00000000628(Hk2),ENSMUSG00000040010(Slc7a5),ENSMUSG00000022346(Myc),ENSMUSG00000028645(Slc2a1),ENSMUSG00000004936(Map2k1),ENSMUSG00000020122(Egfr),ENSMUSG00000020277(Pfkl),ENSMUSG00000021196(Pfkp),ENSMUSG00000039936(Pik3cd),ENSMUSG00000021109(Hif1a),ENSMUSG00000041417(Pik3r1),ENSMUSG00000042817(Flt3),ENSMUSG00000028698(Pik3r3),ENSMUSG00000025161(Slc16a3),ENSMUSG00000024620(Pdgfrb),ENSMUSG0…	ENSMUSG00000031565(Fgfr1),ENSMUSG00000025486(Sirt3),ENSMUSG00000031834(Pik3r2)	http://www.kegg.jp/kegg-bin/show_pathway?map05230/K05092%09%23FFFFFF,red/K04377%09%23FFFFFF,red/K04368%09%23FFFFFF,red/K00922%09%23FFFFFF,red/K04361%09%23FFFFFF,red/K05099%09%23FFFFFF,red/K00850%09%23FFFFFF,red/K05089%09%23FFFFFF,red/K11413%09%23FFFFFF,green/K01425%09%23FFFFFF,red/K02649%09%23FFFFFF,purple/K07299%09%23FFFFFF,red/K13780%09%23FFFFFF,red/K08268%09%23FFFFFF,red/K00844%09%23FFFFFF,red…
mmu01040	Biosynthesis of unsaturated fatty acids	Metabolism	Lipid metabolism	4	8	12	34	0.093253	0.197508	ENSMUSG00000035376(Hacd2),ENSMUSG00000021364(Elovl2),ENSMUSG00000028937(Acot7),ENSMUSG00000027195(Hsd17b12)	ENSMUSG00000028497(Hacd4),ENSMUSG00000032349(Elovl5),ENSMUSG00000021226(Acot2),ENSMUSG00000072949(Acot1),ENSMUSG00000010663(Fads1),ENSMUSG00000063275(Hacd1),ENSMUSG00000025203(Scd2),ENSMUSG00000029098(Acox3)	http://www.kegg.jp/kegg-bin/show_pathway?map01040/K10703%09%23FFFFFF,purple/K17360%09%23FFFFFF,red/K01068%09%23FFFFFF,green/K10224%09%23FFFFFF,green/K00232%09%23FFFFFF,green/K10244%09%23FFFFFF,green/K00507%09%23FFFFFF,green/K10251%09%23FFFFFF,red/K10205%09%23FFFFFF,red/
mmu03440	Homologous recombination	Genetic Information Processing	Replication and repair	2	12	14	41	0.0934244	0.197508	ENSMUSG00000034329(Brip1),ENSMUSG00000041238(Rbbp8)	ENSMUSG00000000751(Rpa1),ENSMUSG00000028933(Xrcc2),ENSMUSG00000041147(Brca2),ENSMUSG00000044702(Palb2),ENSMUSG00000018841(Rad51d),ENSMUSG00000028702(Rad54l),ENSMUSG00000017146(Brca1),ENSMUSG00000030528(Blm),ENSMUSG00000020380(Rad50),ENSMUSG00000038644(Pold1),ENSMUSG00000012483(Rpa3),ENSMUSG00000007646(Rad51c)	http://www.kegg.jp/kegg-bin/show_pathway?map03440/K15362%09%23FFFFFF,red/K10871%09%23FFFFFF,green/K10897%09%23FFFFFF,green/K20773%09%23FFFFFF,red/K10870%09%23FFFFFF,green/K10879%09%23FFFFFF,green/K02327%09%23FFFFFF,green/K08775%09%23FFFFFF,green/K10740%09%23FFFFFF,green/K10901%09%23FFFFFF,green/K10875%09%23FFFFFF,green/K07466%09%23FFFFFF,green/K10866%09%23FFFFFF,green/K10605%09%23FFFFFF,green/
mmu05410	Hypertrophic cardiomyopathy (HCM)	Human Diseases	Cardiovascular diseases	18	7	25	81	0.0959547	0.201505	ENSMUSG00000031799(Tpm4),ENSMUSG00000025746(Il6),ENSMUSG00000039115(Itga9),ENSMUSG00000000555(Itga5),ENSMUSG00000062825(Actg1),ENSMUSG00000078815(Cacng6),ENSMUSG00000026414(Tnnt2),ENSMUSG00000053395(Cacng8),ENSMUSG00000027940(Tpm3),ENSMUSG00000025321(Itgb8),ENSMUSG00000027009(Itga4),ENSMUSG00000029580(Actb),ENSMUSG00000003352(Cacnb3),ENSMUSG00000042284(Itga1),ENSMUSG00000025809(Itgb1),ENSMUSG0000…	ENSMUSG00000021253(Tgfb3),ENSMUSG00000039952(Dag1),ENSMUSG00000020689(Itgb3),ENSMUSG00000028944(Prkag2),ENSMUSG00000035458(Tnni3),ENSMUSG00000027111(Itga6),ENSMUSG00000022817(Itgb5)	http://www.kegg.jp/kegg-bin/show_pathway?map05410/K06483%09%23FFFFFF,red/K04873%09%23FFFFFF,red/K05692%09%23FFFFFF,red/K12568%09%23FFFFFF,red/K04871%09%23FFFFFF,red/K12045%09%23FFFFFF,red/K10375%09%23FFFFFF,red/K16366%09%23FFFFFF,red/K06588%09%23FFFFFF,green/K06265%09%23FFFFFF,green/K12044%09%23FFFFFF,green/K05719%09%23FFFFFF,red/K13377%09%23FFFFFF,green/K09290%09%23FFFFFF,red/K07200%09%23FFFFFF,…
mmu00740	Riboflavin metabolism	Metabolism	Metabolism of cofactors and vitamins	3	1	4	8	0.100451	0.20955	ENSMUSG00000002103(Acp2),ENSMUSG00000040466(Blvrb),ENSMUSG00000001348(Acp5)	ENSMUSG00000037370(Enpp1)	http://www.kegg.jp/kegg-bin/show_pathway?map00740/K05901%09%23FFFFFF,red/K14410%09%23FFFFFF,red/K14379%09%23FFFFFF,red/K01513%09%23FFFFFF,green/
mmu00630	Glyoxylate and dicarboxylate metabolism	Metabolism	Carbohydrate metabolism	3	8	11	31	0.10207	0.211527	ENSMUSG00000005683(Cs),ENSMUSG00000062480(Acat3),ENSMUSG00000020664(Dld)	ENSMUSG00000034424(Gcsh),ENSMUSG00000041650(Pcca),ENSMUSG00000027452(Acss1),ENSMUSG00000032607(Amt),ENSMUSG00000035637(Grhpr),ENSMUSG00000026473(Glul),ENSMUSG00000023921(Mmut),ENSMUSG00000025176(Hoga1)	http://www.kegg.jp/kegg-bin/show_pathway?map00630/K18123%09%23FFFFFF,green/K01647%09%23FFFFFF,red/K01965%09%23FFFFFF,green/K00626%09%23FFFFFF,red/K02437%09%23FFFFFF,green/K00382%09%23FFFFFF,red/K01847%09%23FFFFFF,green/K00049%09%23FFFFFF,green/K00605%09%23FFFFFF,green/K01895%09%23FFFFFF,green/K01915%09%23FFFFFF,green/
mmu00562	Inositol phosphate metabolism	Metabolism	Carbohydrate metabolism	13	9	22	71	0.109231	0.224888	ENSMUSG00000028126(Pip5k1a),ENSMUSG00000022973(Synj1),ENSMUSG00000030269(Mtmr14),ENSMUSG00000039936(Pik3cd),ENSMUSG00000024896(Minpp1),ENSMUSG00000039431(Mtmr7),ENSMUSG00000024960(Plcb3),ENSMUSG00000020573(Pik3cg),ENSMUSG00000028894(Inpp5b),ENSMUSG00000031337(Mtm1),ENSMUSG00000021987(Mtmr6),ENSMUSG00000003752(Itpkc),ENSMUSG00000029186(Pi4k2b)	ENSMUSG00000026288(Inpp5d),ENSMUSG00000040061(Plcb2),ENSMUSG00000026925(Inpp5e),ENSMUSG00000038417(Fig4),ENSMUSG00000016933(Plcg1),ENSMUSG00000026102(Inpp1),ENSMUSG00000023805(Synj2),ENSMUSG00000042105(Inpp5f),ENSMUSG00000024525(Impa2)	http://www.kegg.jp/kegg-bin/show_pathway?map00562/K00889%09%23FFFFFF,red/K01099%09%23FFFFFF,red/K18083%09%23FFFFFF,red/K00911%09%23FFFFFF,red/K21289%09%23FFFFFF,red/K20279%09%23FFFFFF,purple/K18086%09%23FFFFFF,red/K13711%09%23FFFFFF,red/K20278%09%23FFFFFF,green/K21798%09%23FFFFFF,green/K00922%09%23FFFFFF,red/K01116%09%23FFFFFF,green/K01092%09%23FFFFFF,green/K22913%09%23FFFFFF,green/K01107%09%23FF…
mmu04540	Gap junction	Cellular Processes	Cellular community - eukaryotes	15	11	26	86	0.111206	0.227466	ENSMUSG00000020122(Egfr),ENSMUSG00000050953(Gja1),ENSMUSG00000000001(Gnai3),ENSMUSG00000062591(Tubb4a),ENSMUSG00000045136(Tubb2b),ENSMUSG00000038668(Lpar1),ENSMUSG00000024620(Pdgfrb),ENSMUSG00000052889(Prkcb),ENSMUSG00000024960(Plcb3),ENSMUSG00000034997(Htr2a),ENSMUSG00000024639(Gnaq),ENSMUSG00000004936(Map2k1),ENSMUSG00000027646(Src),ENSMUSG00000001473(Tubb6),ENSMUSG00000024241(Sos1)	ENSMUSG00000005580(Adcy9),ENSMUSG00000028017(Egf),ENSMUSG00000031659(Adcy7),ENSMUSG00000005469(Prkaca),ENSMUSG00000028019(Pdgfc),ENSMUSG00000042644(Itpr3),ENSMUSG00000019942(Cdk1),ENSMUSG00000025856(Pdgfa),ENSMUSG00000020654(Adcy3),ENSMUSG00000026228(Htr2b),ENSMUSG00000040061(Plcb2)	http://www.kegg.jp/kegg-bin/show_pathway?map04540/K07372%09%23FFFFFF,red/K08047%09%23FFFFFF,green/K03099%09%23FFFFFF,red/K04157%09%23FFFFFF,purple/K04368%09%23FFFFFF,red/K05858%09%23FFFFFF,purple/K04345%09%23FFFFFF,green/K08043%09%23FFFFFF,green/K04630%09%23FFFFFF,red/K04289%09%23FFFFFF,red/K19662%09%23FFFFFF,red/K05450%09%23FFFFFF,green/K04361%09%23FFFFFF,red/K05089%09%23FFFFFF,red/K08049%09%23F…
mmu05226	Gastric cancer	Human Diseases	Cancers: Specific types	18	24	42	147	0.115284	0.234286	ENSMUSG00000073802(Cdkn2b),ENSMUSG00000009376(Met),ENSMUSG00000024241(Sos1),ENSMUSG00000044674(Fzd1),ENSMUSG00000028698(Pik3r3),ENSMUSG00000016477(E2f3),ENSMUSG00000039936(Pik3cd),ENSMUSG00000033227(Wnt6),ENSMUSG00000015312(Gadd45b),ENSMUSG00000041417(Pik3r1),ENSMUSG00000004936(Map2k1),ENSMUSG00000045005(Fzd5),ENSMUSG00000020122(Egfr),ENSMUSG00000024576(Csnk1a1),ENSMUSG00000057789(Bak1),ENSMUSG00…	ENSMUSG00000035109(Shc4),ENSMUSG00000025358(Cdk2),ENSMUSG00000031834(Pik3r2),ENSMUSG00000021668(Polk),ENSMUSG00000028864(Hgf),ENSMUSG00000024913(Lrp5),ENSMUSG00000015846(Rxra),ENSMUSG00000021253(Tgfb3),ENSMUSG00000018983(E2f2),ENSMUSG00000022105(Rb1),ENSMUSG00000032440(Tgfbr2),ENSMUSG00000020312(Shc2),ENSMUSG00000028017(Egf),ENSMUSG00000007613(Tgfbr1),ENSMUSG00000002109(Ddb2),ENSMUSG00000067199(F…	http://www.kegg.jp/kegg-bin/show_pathway?map05226/K09593%09%23FFFFFF,green/K00922%09%23FFFFFF,red/K06618%09%23FFFFFF,green/K06620%09%23FFFFFF,red/K08524%09%23FFFFFF,green/K17454%09%23FFFFFF,green/K04402%09%23FFFFFF,purple/K04503%09%23FFFFFF,green/K17449%09%23FFFFFF,green/K02353%09%23FFFFFF,green/K05099%09%23FFFFFF,red/K05460%09%23FFFFFF,green/K00445%09%23FFFFFF,red/K04674%09%23FFFFFF,green/K02432…
mmu04520	Adherens junction	Cellular Processes	Cellular community - eukaryotes	15	6	21	68	0.11891	0.240107	ENSMUSG00000025314(Ptprj),ENSMUSG00000006411(Nectin4),ENSMUSG00000029580(Actb),ENSMUSG00000004266(Ptpn6),ENSMUSG00000009376(Met),ENSMUSG00000062300(Nectin2),ENSMUSG00000027646(Src),ENSMUSG00000033295(Ptprf),ENSMUSG00000020122(Egfr),ENSMUSG00000034101(Ctnnd1),ENSMUSG00000062825(Actg1),ENSMUSG00000046707(Csnk2a2),ENSMUSG00000021823(Vcl),ENSMUSG00000027540(Ptpn1),ENSMUSG00000033220(Rac2)	ENSMUSG00000031565(Fgfr1),ENSMUSG00000005534(Insr),ENSMUSG00000032440(Tgfbr2),ENSMUSG00000007613(Tgfbr1),ENSMUSG00000025372(Baiap2),ENSMUSG00000022676(Snai2)	http://www.kegg.jp/kegg-bin/show_pathway?map04520/K06531%09%23FFFFFF,red/K05706%09%23FFFFFF,green/K04674%09%23FFFFFF,green/K05700%09%23FFFFFF,red/K07860%09%23FFFFFF,red/K04361%09%23FFFFFF,red/K05627%09%23FFFFFF,green/K04362%09%23FFFFFF,green/K04527%09%23FFFFFF,green/K05697%09%23FFFFFF,red/K05698%09%23FFFFFF,red/K06593%09%23FFFFFF,red/K05099%09%23FFFFFF,red/K05704%09%23FFFFFF,red/K05690%09%23FFFFF…
mmu00730	Thiamine metabolism	Metabolism	Metabolism of cofactors and vitamins	2	4	6	15	0.127243	0.255296	ENSMUSG00000028792(Ak2),ENSMUSG00000028527(Ak4)	ENSMUSG00000031851(Ntpcr),ENSMUSG00000045691(Thtpa),ENSMUSG00000027618(Nfs1),ENSMUSG00000026817(Ak1)	http://www.kegg.jp/kegg-bin/show_pathway?map00730/K00939%09%23FFFFFF,purple/K06928%09%23FFFFFF,green/K05307%09%23FFFFFF,green/K04487%09%23FFFFFF,green/
mmu04370	VEGF signaling pathway	Environmental Information Processing	Signal transduction	13	5	18	58	0.136147	0.271432	ENSMUSG00000022092(Ppp3cc),ENSMUSG00000039936(Pik3cd),ENSMUSG00000033220(Rac2),ENSMUSG00000016528(Mapkapk2),ENSMUSG00000041417(Pik3r1),ENSMUSG00000053137(Mapk11),ENSMUSG00000032487(Ptgs2),ENSMUSG00000056220(Pla2g4a),ENSMUSG00000028698(Pik3r3),ENSMUSG00000027646(Src),ENSMUSG00000004936(Map2k1),ENSMUSG00000052889(Prkcb),ENSMUSG00000033847(Pla2g4c)	ENSMUSG00000016933(Plcg1),ENSMUSG00000020312(Shc2),ENSMUSG00000031834(Pik3r2),ENSMUSG00000028914(Casp9),ENSMUSG00000027544(Nfatc2)	http://www.kegg.jp/kegg-bin/show_pathway?map04370/K19662%09%23FFFFFF,red/K02649%09%23FFFFFF,purple/K04368%09%23FFFFFF,red/K05704%09%23FFFFFF,red/K04443%09%23FFFFFF,red/K17447%09%23FFFFFF,green/K04441%09%23FFFFFF,red/K04348%09%23FFFFFF,red/K07860%09%23FFFFFF,red/K16342%09%23FFFFFF,red/K01116%09%23FFFFFF,green/K17332%09%23FFFFFF,green/K00922%09%23FFFFFF,red/K04399%09%23FFFFFF,green/K11987%09%23FFFF…
mmu00750	Vitamin B6 metabolism	Metabolism	Metabolism of cofactors and vitamins	2	2	4	9	0.147579	0.290958	ENSMUSG00000063558(Aox1),ENSMUSG00000024640(Psat1)	ENSMUSG00000032788(Pdxk),ENSMUSG00000018659(Pnpo)	http://www.kegg.jp/kegg-bin/show_pathway?map00750/K00157%09%23FFFFFF,red/K00275%09%23FFFFFF,green/K00868%09%23FFFFFF,green/K00831%09%23FFFFFF,red/
mmu00670	One carbon pool by folate	Metabolism	Metabolism of cofactors and vitamins	3	4	7	19	0.148712	0.290958	ENSMUSG00000029009(Mthfr),ENSMUSG00000029376(Mthfd2l),ENSMUSG00000005667(Mthfd2)	ENSMUSG00000021311(Mtr),ENSMUSG00000032607(Amt),ENSMUSG00000021048(Mthfd1),ENSMUSG00000021707(Dhfr)	http://www.kegg.jp/kegg-bin/show_pathway?map00670/K00297%09%23FFFFFF,red/K00288%09%23FFFFFF,green/K00548%09%23FFFFFF,green/K13403%09%23FFFFFF,red/K00605%09%23FFFFFF,green/K00287%09%23FFFFFF,green/
mmu00100	Steroid biosynthesis	Metabolism	Lipid metabolism	5	2	7	19	0.148712	0.290958	ENSMUSG00000022351(Sqle),ENSMUSG00000032018(Sc5d),ENSMUSG00000026675(Hsd17b7),ENSMUSG00000021273(Fdft1),ENSMUSG00000001467(Cyp51)	ENSMUSG00000026600(Soat1),ENSMUSG00000058454(Dhcr7)	http://www.kegg.jp/kegg-bin/show_pathway?map00100/K00637%09%23FFFFFF,green/K00227%09%23FFFFFF,red/K00213%09%23FFFFFF,green/K13373%09%23FFFFFF,red/K00801%09%23FFFFFF,red/K00511%09%23FFFFFF,red/K05917%09%23FFFFFF,red/
mmu00970	Aminoacyl-tRNA biosynthesis	Genetic Information Processing	Translation	3	11	14	44	0.149711	0.291105	ENSMUSG00000031948(Kars),ENSMUSG00000018848(Rars),ENSMUSG00000003808(Farsa)	ENSMUSG00000063179(Pstk),ENSMUSG00000028107(Tars2),ENSMUSG00000028085(Gatb),ENSMUSG00000029536(Gatc),ENSMUSG00000038838(Vars2),ENSMUSG00000043572(Pars2),ENSMUSG00000019143(Hars2),ENSMUSG00000018995(Nars2),ENSMUSG00000026709(Dars2),ENSMUSG00000056228(Cars2),ENSMUSG00000030515(Tarsl2)	http://www.kegg.jp/kegg-bin/show_pathway?map00970/K02434%09%23FFFFFF,green/K01893%09%23FFFFFF,green/K10837%09%23FFFFFF,green/K01868%09%23FFFFFF,green/K01892%09%23FFFFFF,green/K01883%09%23FFFFFF,green/K01889%09%23FFFFFF,red/K04567%09%23FFFFFF,red/K01881%09%23FFFFFF,green/K02435%09%23FFFFFF,green/K01873%09%23FFFFFF,green/K01876%09%23FFFFFF,green/K01887%09%23FFFFFF,red/
mmu04725	Cholinergic synapse	Organismal Systems	Nervous system	17	15	32	112	0.152889	0.29546	ENSMUSG00000053819(Camk2d),ENSMUSG00000036402(Gng12),ENSMUSG00000028698(Pik3r3),ENSMUSG00000024639(Gnaq),ENSMUSG00000004936(Map2k1),ENSMUSG00000020573(Pik3cg),ENSMUSG00000024960(Plcb3),ENSMUSG00000052889(Prkcb),ENSMUSG00000041417(Pik3r1),ENSMUSG00000000001(Gnai3),ENSMUSG00000039936(Pik3cd),ENSMUSG00000046207(Pik3r6),ENSMUSG00000053007(Creb5),ENSMUSG00000029064(Gnb1),ENSMUSG00000024789(Jak2),ENSMU…	ENSMUSG00000043004(Gng2),ENSMUSG00000038648(Creb3l2),ENSMUSG00000040061(Plcb2),ENSMUSG00000031834(Pik3r2),ENSMUSG00000021820(Camk2g),ENSMUSG00000020654(Adcy3),ENSMUSG00000021250(Fos),ENSMUSG00000034656(Cacna1a),ENSMUSG00000042644(Itpr3),ENSMUSG00000048240(Gng7),ENSMUSG00000031659(Adcy7),ENSMUSG00000005469(Prkaca),ENSMUSG00000032192(Gnb5),ENSMUSG00000038607(Gng10),ENSMUSG00000005580(Adcy9)	http://www.kegg.jp/kegg-bin/show_pathway?map04725/K08047%09%23FFFFFF,green/K04344%09%23FFFFFF,green/K04379%09%23FFFFFF,green/K04345%09%23FFFFFF,green/K08049%09%23FFFFFF,green/K04538%09%23FFFFFF,red/K04630%09%23FFFFFF,red/K04545%09%23FFFFFF,green/K04447%09%23FFFFFF,red/K09047%09%23FFFFFF,red/K04515%09%23FFFFFF,purple/K04543%09%23FFFFFF,green/K04960%09%23FFFFFF,green/K21289%09%23FFFFFF,red/K19662%0…
mmu00440	Phosphonate and phosphinate metabolism	Metabolism	Metabolism of other amino acids	1	2	3	6	0.153978	0.29575	ENSMUSG00000040774(Cept1)	ENSMUSG00000005615(Pcyt1a),ENSMUSG00000035246(Pcyt1b)	http://www.kegg.jp/kegg-bin/show_pathway?map00440/K00968%09%23FFFFFF,green/K13644%09%23FFFFFF,red/
mmu04930	Type II diabetes mellitus	Human Diseases	Endocrine and metabolic diseases	9	6	15	48	0.156582	0.298929	ENSMUSG00000024401(Tnf),ENSMUSG00000028698(Pik3r3),ENSMUSG00000021936(Mapk8),ENSMUSG00000021948(Prkcd),ENSMUSG00000038037(Socs1),ENSMUSG00000041417(Pik3r1),ENSMUSG00000039936(Pik3cd),ENSMUSG00000053113(Socs3),ENSMUSG00000000628(Hk2)	ENSMUSG00000031834(Pik3r2),ENSMUSG00000038894(Irs2),ENSMUSG00000034656(Cacna1a),ENSMUSG00000005534(Insr),ENSMUSG00000020027(Socs2),ENSMUSG00000055980(Irs1)	http://www.kegg.jp/kegg-bin/show_pathway?map04930/K04695%09%23FFFFFF,green/K04344%09%23FFFFFF,green/K04694%09%23FFFFFF,red/K04440%09%23FFFFFF,red/K02649%09%23FFFFFF,purple/K00844%09%23FFFFFF,red/K16172%09%23FFFFFF,green/K04527%09%23FFFFFF,green/K07187%09%23FFFFFF,green/K03156%09%23FFFFFF,red/K00922%09%23FFFFFF,red/K06068%09%23FFFFFF,red/K04696%09%23FFFFFF,red/
mmu00515	Mannose type O-glycan biosynthesis	Metabolism	Glycan biosynthesis and metabolism	1	7	8	23	0.165623	0.314284	ENSMUSG00000028538(St3gal3)	ENSMUSG00000066235(Pomgnt2),ENSMUSG00000039254(Pomt1),ENSMUSG00000028413(B4galt1),ENSMUSG00000043153(Crppa),ENSMUSG00000026080(Chst10),ENSMUSG00000037251(Pomk),ENSMUSG00000034126(Pomt2)	http://www.kegg.jp/kegg-bin/show_pathway?map00515/K17547%09%23FFFFFF,green/K00781%09%23FFFFFF,red/K07966%09%23FFFFFF,green/K09674%09%23FFFFFF,green/K18207%09%23FFFFFF,green/K21031%09%23FFFFFF,green/K00728%09%23FFFFFF,green/
mmu04530	Tight junction	Cellular Processes	Cellular community - eukaryotes	30	13	43	156	0.170173	0.320985	ENSMUSG00000036718(Micall2),ENSMUSG00000038235(F11r),ENSMUSG00000020349(Ppp2ca),ENSMUSG00000055976(Cldn23),ENSMUSG00000062232(Rapgef2),ENSMUSG00000052397(Ezr),ENSMUSG00000053062(Jam2),ENSMUSG00000009630(Ppp2cb),ENSMUSG00000030766(Arhgap17),ENSMUSG00000062825(Actg1),ENSMUSG00000013076(Amotl1),ENSMUSG00000045795(Whamm),ENSMUSG00000041769(Ppp2r2d),ENSMUSG00000030189(Ybx3),ENSMUSG00000050029(Rap2c),E…	ENSMUSG00000006728(Cdk4),ENSMUSG00000056214(Pard6g),ENSMUSG00000032232(Cgnl1),ENSMUSG00000028944(Prkag2),ENSMUSG00000021754(Map3k1),ENSMUSG00000005469(Prkaca),ENSMUSG00000041688(Amot),ENSMUSG00000005699(Pard6a),ENSMUSG00000052684(Jun),ENSMUSG00000037533(Rapgef6),ENSMUSG00000070348(Ccnd1),ENSMUSG00000034917(Tjp3),ENSMUSG00000034868(Myl12b)	http://www.kegg.jp/kegg-bin/show_pathway?map04530/K06097%09%23FFFFFF,green/K21110%09%23FFFFFF,green/K08018%09%23FFFFFF,red/K07839%09%23FFFFFF,red/K06093%09%23FFFFFF,green/K05763%09%23FFFFFF,red/K05692%09%23FFFFFF,red/K04503%09%23FFFFFF,green/K06104%09%23FFFFFF,red/K04426%09%23FFFFFF,red/K06735%09%23FFFFFF,red/K16819%09%23FFFFFF,green/K04416%09%23FFFFFF,green/K12791%09%23FFFFFF,red/K12757%09%23FFF…
mmu04979	Cholesterol metabolism	Organismal Systems	Digestive system	6	9	15	49	0.178189	0.334104	ENSMUSG00000035237(Lcat),ENSMUSG00000008892(Vdac3),ENSMUSG00000053846(Lipg),ENSMUSG00000041736(Tspo),ENSMUSG00000018167(Stard3),ENSMUSG00000032193(Ldlr)	ENSMUSG00000024413(Npc1),ENSMUSG00000037295(Ldlrap1),ENSMUSG00000026170(Cyp27a1),ENSMUSG00000037936(Scarb1),ENSMUSG00000040249(Lrp1),ENSMUSG00000068747(Sort1),ENSMUSG00000027698(Nceh1),ENSMUSG00000002289(Angptl4),ENSMUSG00000026600(Soat1)	http://www.kegg.jp/kegg-bin/show_pathway?map04979/K00488%09%23FFFFFF,green/K08767%09%23FFFFFF,green/K12385%09%23FFFFFF,green/K05770%09%23FFFFFF,red/K04550%09%23FFFFFF,green/K14349%09%23FFFFFF,green/K12388%09%23FFFFFF,green/K13885%09%23FFFFFF,green/K12473%09%23FFFFFF,red/K12474%09%23FFFFFF,green/K22284%09%23FFFFFF,red/K00650%09%23FFFFFF,red/K00637%09%23FFFFFF,green/K22291%09%23FFFFFF,red/K15041%09…
mmu00650	Butanoate metabolism	Metabolism	Carbohydrate metabolism	2	7	9	27	0.179261	0.334126	ENSMUSG00000093930(Hmgcs1),ENSMUSG00000062480(Acat3)	ENSMUSG00000025465(Echs1),ENSMUSG00000029545(Acads),ENSMUSG00000027984(Hadh),ENSMUSG00000046598(Bdh1),ENSMUSG00000022853(Ehhadh),ENSMUSG00000020988(L2hgdh),ENSMUSG00000028672(Hmgcl)	http://www.kegg.jp/kegg-bin/show_pathway?map00650/K01640%09%23FFFFFF,green/K00019%09%23FFFFFF,green/K07514%09%23FFFFFF,green/K01641%09%23FFFFFF,red/K00022%09%23FFFFFF,green/K00626%09%23FFFFFF,red/K00109%09%23FFFFFF,green/K00248%09%23FFFFFF,green/K07511%09%23FFFFFF,green/
mmu05146	Amoebiasis	Human Diseases	Infectious diseases: Parasitic	22	6	28	99	0.187721	0.347836	ENSMUSG00000051439(Cd14),ENSMUSG00000016529(Il10),ENSMUSG00000041417(Pik3r1),ENSMUSG00000024639(Gnaq),ENSMUSG00000024960(Plcb3),ENSMUSG00000027776(Il12a),ENSMUSG00000031503(Col4a2),ENSMUSG00000027995(Tlr2),ENSMUSG00000020826(Nos2),ENSMUSG00000039936(Pik3cd),ENSMUSG00000021823(Vcl),ENSMUSG00000024401(Tnf),ENSMUSG00000025746(Il6),ENSMUSG00000024927(Rela),ENSMUSG00000017831(Rab5a),ENSMUSG00000030786…	ENSMUSG00000052688(Rab7b),ENSMUSG00000024421(Lama3),ENSMUSG00000005469(Prkaca),ENSMUSG00000040061(Plcb2),ENSMUSG00000031834(Pik3r2),ENSMUSG00000021253(Tgfb3)	http://www.kegg.jp/kegg-bin/show_pathway?map05146/K19662%09%23FFFFFF,red/K02580%09%23FFFFFF,red/K13377%09%23FFFFFF,green/K05405%09%23FFFFFF,red/K03156%09%23FFFFFF,red/K06237%09%23FFFFFF,red/K06461%09%23FFFFFF,red/K05406%09%23FFFFFF,red/K04735%09%23FFFFFF,red/K05425%09%23FFFFFF,red/K07898%09%23FFFFFF,green/K05443%09%23FFFFFF,red/K05858%09%23FFFFFF,purple/K00922%09%23FFFFFF,red/K04391%09%23FFFFFF,r…
mmu00564	Glycerophospholipid metabolism	Metabolism	Lipid metabolism	12	15	27	96	0.201958	0.372027	ENSMUSG00000060675(Plaat3),ENSMUSG00000035237(Lcat),ENSMUSG00000021759(Plpp1),ENSMUSG00000033192(Lpcat2),ENSMUSG00000040774(Cept1),ENSMUSG00000030275(Etnk1),ENSMUSG00000033847(Pla2g4c),ENSMUSG00000026827(Gpd2),ENSMUSG00000017715(Pgs1),ENSMUSG00000056220(Pla2g4a),ENSMUSG00000034731(Dgkh),ENSMUSG00000023827(Agpat4)	ENSMUSG00000020593(Lpin1),ENSMUSG00000028751(Pla2g2e),ENSMUSG00000024978(Gpam),ENSMUSG00000004565(Pnpla6),ENSMUSG00000050627(Gpd1l),ENSMUSG00000036833(Pnpla7),ENSMUSG00000027999(Pla2g12a),ENSMUSG00000023019(Gpd1),ENSMUSG00000022861(Dgkg),ENSMUSG00000031903(Pla2g15),ENSMUSG00000035246(Pcyt1b),ENSMUSG00000038732(Mboat1),ENSMUSG00000005615(Pcyt1a),ENSMUSG00000025495(Ptdss2),ENSMUSG00000040479(Dgkz)	http://www.kegg.jp/kegg-bin/show_pathway?map00564/K01080%09%23FFFFFF,red/K13644%09%23FFFFFF,red/K00995%09%23FFFFFF,red/K00650%09%23FFFFFF,red/K16817%09%23FFFFFF,red/K00111%09%23FFFFFF,red/K01047%09%23FFFFFF,green/K00894%09%23FFFFFF,red/K00006%09%23FFFFFF,green/K14676%09%23FFFFFF,green/K16342%09%23FFFFFF,red/K13517%09%23FFFFFF,green/K06129%09%23FFFFFF,green/K15728%09%23FFFFFF,green/K00901%09%23FFF…
mmu00770	Pantothenate and CoA biosynthesis	Metabolism	Metabolism of cofactors and vitamins	1	5	6	17	0.204967	0.375376	ENSMUSG00000020010(Vnn3)	ENSMUSG00000033610(Pank1),ENSMUSG00000001755(Coasy),ENSMUSG00000063849(Ppcdc),ENSMUSG00000037370(Enpp1),ENSMUSG00000028636(Ppcs)	http://www.kegg.jp/kegg-bin/show_pathway?map00770/K01922%09%23FFFFFF,green/K02318%09%23FFFFFF,green/K01513%09%23FFFFFF,green/K09680%09%23FFFFFF,green/K01598%09%23FFFFFF,green/K08069%09%23FFFFFF,red/
mmu04750	Inflammatory mediator regulation of TRP channels	Organismal Systems	Sensory system	19	15	34	124	0.213336	0.386164	ENSMUSG00000053137(Mapk11),ENSMUSG00000039942(Ptger4),ENSMUSG00000027398(Il1b),ENSMUSG00000052889(Prkcb),ENSMUSG00000033847(Pla2g4c),ENSMUSG00000024960(Plcb3),ENSMUSG00000021948(Prkcd),ENSMUSG00000001175(Calm1),ENSMUSG00000034997(Htr2a),ENSMUSG00000024639(Gnaq),ENSMUSG00000053819(Camk2d),ENSMUSG00000028698(Pik3r3),ENSMUSG00000027646(Src),ENSMUSG00000041417(Pik3r1),ENSMUSG00000039936(Pik3cd),ENSMU…	ENSMUSG00000042644(Itpr3),ENSMUSG00000005580(Adcy9),ENSMUSG00000020654(Adcy3),ENSMUSG00000031659(Adcy7),ENSMUSG00000005469(Prkaca),ENSMUSG00000026228(Htr2b),ENSMUSG00000037759(Ptger2),ENSMUSG00000053004(Hrh1),ENSMUSG00000040061(Plcb2),ENSMUSG00000031834(Pik3r2),ENSMUSG00000021820(Camk2g),ENSMUSG00000021108(Prkch),ENSMUSG00000016933(Plcg1),ENSMUSG00000014158(Trpv4),ENSMUSG00000015224(Cyp2j9)	http://www.kegg.jp/kegg-bin/show_pathway?map04750/K08049%09%23FFFFFF,green/K19662%09%23FFFFFF,red/K04259%09%23FFFFFF,green/K04345%09%23FFFFFF,green/K01116%09%23FFFFFF,green/K06269%09%23FFFFFF,red/K04973%09%23FFFFFF,green/K06068%09%23FFFFFF,red/K05704%09%23FFFFFF,red/K04441%09%23FFFFFF,red/K04634%09%23FFFFFF,red/K08047%09%23FFFFFF,green/K04960%09%23FFFFFF,green/K07418%09%23FFFFFF,green/K04149%09%2…
mmu03420	Nucleotide excision repair	Genetic Information Processing	Replication and repair	0	13	13	43	0.214536	0.386164	-	ENSMUSG00000030094(Xpc),ENSMUSG00000000751(Rpa1),ENSMUSG00000026048(Ercc5),ENSMUSG00000029191(Rfc1),ENSMUSG00000023104(Rfc2),ENSMUSG00000028329(Xpa),ENSMUSG00000020974(Pole2),ENSMUSG00000002109(Ddb2),ENSMUSG00000007080(Pole),ENSMUSG00000056394(Lig1),ENSMUSG00000021639(Gtf2h2),ENSMUSG00000038644(Pold1),ENSMUSG00000012483(Rpa3)	http://www.kegg.jp/kegg-bin/show_pathway?map03420/K10755%09%23FFFFFF,green/K10847%09%23FFFFFF,green/K10838%09%23FFFFFF,green/K07466%09%23FFFFFF,green/K10754%09%23FFFFFF,green/K10740%09%23FFFFFF,green/K02327%09%23FFFFFF,green/K10140%09%23FFFFFF,green/K10747%09%23FFFFFF,green/K02324%09%23FFFFFF,green/K03142%09%23FFFFFF,green/K10846%09%23FFFFFF,green/K02325%09%23FFFFFF,green/
mmu00600	Sphingolipid metabolism	Metabolism	Lipid metabolism	6	7	13	43	0.214536	0.386164	ENSMUSG00000021036(Sptlc2),ENSMUSG00000021759(Plpp1),ENSMUSG00000050931(Sgms2),ENSMUSG00000028381(Ugcg),ENSMUSG00000024887(Asah2),ENSMUSG00000040451(Sgms1)	ENSMUSG00000037049(Smpd1),ENSMUSG00000021003(Galc),ENSMUSG00000019822(Smpd2),ENSMUSG00000035891(Cerk),ENSMUSG00000028467(Gba2),ENSMUSG00000009905(Kdsr),ENSMUSG00000021054(Sgpp1)	http://www.kegg.jp/kegg-bin/show_pathway?map00600/K00720%09%23FFFFFF,red/K04708%09%23FFFFFF,green/K01202%09%23FFFFFF,green/K01080%09%23FFFFFF,red/K12349%09%23FFFFFF,red/K12351%09%23FFFFFF,green/K00654%09%23FFFFFF,red/K17108%09%23FFFFFF,green/K04715%09%23FFFFFF,green/K04714%09%23FFFFFF,red/K04716%09%23FFFFFF,green/K12350%09%23FFFFFF,green/
mmu04136	Autophagy - other	Cellular Processes	Transport and catabolism	3	7	10	32	0.221018	0.395572	ENSMUSG00000033124(Atg9a),ENSMUSG00000020349(Ppp2ca),ENSMUSG00000009630(Ppp2cb)	ENSMUSG00000004798(Ulk2),ENSMUSG00000027244(Atg13),ENSMUSG00000041895(Wipi1),ENSMUSG00000028550(Atg4c),ENSMUSG00000041341(Atg2b),ENSMUSG00000024773(Atg2a),ENSMUSG00000030314(Atg7)	http://www.kegg.jp/kegg-bin/show_pathway?map04136/K17907%09%23FFFFFF,red/K17908%09%23FFFFFF,green/K08337%09%23FFFFFF,green/K17906%09%23FFFFFF,green/K04382%09%23FFFFFF,red/K08269%09%23FFFFFF,green/K08331%09%23FFFFFF,green/K08342%09%23FFFFFF,green/
mmu00071	Fatty acid degradation	Metabolism	Lipid metabolism	6	9	15	51	0.225459	0.40124	ENSMUSG00000055301(Adh7),ENSMUSG00000062480(Acat3),ENSMUSG00000031278(Acsl4),ENSMUSG00000024981(Acsl5),ENSMUSG00000018796(Acsl1),ENSMUSG00000021417(Eci2)	ENSMUSG00000022853(Ehhadh),ENSMUSG00000029545(Acads),ENSMUSG00000026687(Aldh9a1),ENSMUSG00000025465(Echs1),ENSMUSG00000036880(Acaa2),ENSMUSG00000062908(Acadm),ENSMUSG00000027984(Hadh),ENSMUSG00000003809(Gcdh),ENSMUSG00000029098(Acox3)	http://www.kegg.jp/kegg-bin/show_pathway?map00071/K13239%09%23FFFFFF,red/K07511%09%23FFFFFF,green/K01897%09%23FFFFFF,red/K00626%09%23FFFFFF,red/K07514%09%23FFFFFF,green/K00232%09%23FFFFFF,green/K00149%09%23FFFFFF,green/K00249%09%23FFFFFF,green/K07508%09%23FFFFFF,green/K00248%09%23FFFFFF,green/K13951%09%23FFFFFF,red/K00252%09%23FFFFFF,green/K00022%09%23FFFFFF,green/
mmu04512	ECM-receptor interaction	Environmental Information Processing	Signaling molecules and interaction	16	7	23	82	0.229597	0.406309	ENSMUSG00000025809(Itgb1),ENSMUSG00000017009(Sdc4),ENSMUSG00000042284(Itga1),ENSMUSG00000020592(Sdc1),ENSMUSG00000027009(Itga4),ENSMUSG00000025321(Itgb8),ENSMUSG00000021702(Thbs4),ENSMUSG00000005087(Cd44),ENSMUSG00000029304(Spp1),ENSMUSG00000055447(Cd47),ENSMUSG00000031503(Col4a2),ENSMUSG00000041936(Agrn),ENSMUSG00000000555(Itga5),ENSMUSG00000039115(Itga9),ENSMUSG00000040152(Thbs1),ENSMUSG0000002…	ENSMUSG00000022817(Itgb5),ENSMUSG00000001930(Vwf),ENSMUSG00000027111(Itga6),ENSMUSG00000024421(Lama3),ENSMUSG00000038486(Sv2a),ENSMUSG00000020689(Itgb3),ENSMUSG00000039952(Dag1)	http://www.kegg.jp/kegg-bin/show_pathway?map04512/K06254%09%23FFFFFF,red/K03900%09%23FFFFFF,green/K06585%09%23FFFFFF,red/K06256%09%23FFFFFF,red/K04659%09%23FFFFFF,red/K06483%09%23FFFFFF,red/K06240%09%23FFFFFF,green/K16857%09%23FFFFFF,red/K06258%09%23FFFFFF,green/K06265%09%23FFFFFF,green/K06484%09%23FFFFFF,red/K06257%09%23FFFFFF,red/K06485%09%23FFFFFF,green/K06237%09%23FFFFFF,red/K06588%09%23FFFFF…
mmu04914	Progesterone-mediated oocyte maturation	Organismal Systems	Endocrine system	11	14	25	90	0.233685	0.409786	ENSMUSG00000004936(Map2k1),ENSMUSG00000020300(Cpeb4),ENSMUSG00000002413(Braf),ENSMUSG00000053137(Mapk11),ENSMUSG00000021936(Mapk8),ENSMUSG00000021270(Hsp90aa1),ENSMUSG00000041417(Pik3r1),ENSMUSG00000000001(Gnai3),ENSMUSG00000039936(Pik3cd),ENSMUSG00000029910(Mad2l1),ENSMUSG00000028698(Pik3r3)	ENSMUSG00000027330(Cdc25b),ENSMUSG00000005469(Prkaca),ENSMUSG00000031659(Adcy7),ENSMUSG00000027379(Bub1),ENSMUSG00000029554(Mad1l1),ENSMUSG00000020654(Adcy3),ENSMUSG00000019942(Cdk1),ENSMUSG00000025586(Cpeb1),ENSMUSG00000005580(Adcy9),ENSMUSG00000030677(Kif22),ENSMUSG00000025358(Cdk2),ENSMUSG00000024370(Cdc23),ENSMUSG00000030671(Pde3b),ENSMUSG00000031834(Pik3r2)	http://www.kegg.jp/kegg-bin/show_pathway?map04914/K04440%09%23FFFFFF,red/K02537%09%23FFFFFF,red/K00922%09%23FFFFFF,red/K08049%09%23FFFFFF,green/K03355%09%23FFFFFF,green/K04441%09%23FFFFFF,red/K06679%09%23FFFFFF,green/K04079%09%23FFFFFF,red/K04345%09%23FFFFFF,green/K13296%09%23FFFFFF,green/K10403%09%23FFFFFF,green/K08043%09%23FFFFFF,green/K02602%09%23FFFFFF,purple/K04368%09%23FFFFFF,red/K02087%09%…
mmu04150	mTOR signaling pathway	Environmental Information Processing	Signal transduction	21	20	41	153	0.234163	0.409786	ENSMUSG00000041417(Pik3r1),ENSMUSG00000039936(Pik3cd),ENSMUSG00000050310(Rictor),ENSMUSG00000028156(Eif4e),ENSMUSG00000028945(Rheb),ENSMUSG00000019210(Atp6v1e1),ENSMUSG00000079614(Seh1l),ENSMUSG00000040010(Slc7a5),ENSMUSG00000045005(Fzd5),ENSMUSG00000024170(Telo2),ENSMUSG00000033227(Wnt6),ENSMUSG00000024401(Tnf),ENSMUSG00000031959(Wdr59),ENSMUSG00000028698(Pik3r3),ENSMUSG00000044674(Fzd1),ENSMUSG…	ENSMUSG00000024913(Lrp5),ENSMUSG00000054115(Skp2),ENSMUSG00000022419(Deptor),ENSMUSG00000055980(Irs1),ENSMUSG00000028893(Sesn2),ENSMUSG00000032633(Flcn),ENSMUSG00000004798(Ulk2),ENSMUSG00000015944(Castor2),ENSMUSG00000021368(Tbc1d7),ENSMUSG00000047789(Slc38a9),ENSMUSG00000061175(Fnip2),ENSMUSG00000029512(Ulk1),ENSMUSG00000031834(Pik3r2),ENSMUSG00000028278(Rragd),ENSMUSG00000041658(Rragb),ENSMUSG0…	http://www.kegg.jp/kegg-bin/show_pathway?map04150/K14299%09%23FFFFFF,red/K04527%09%23FFFFFF,green/K20396%09%23FFFFFF,green/K03156%09%23FFFFFF,red/K02375%09%23FFFFFF,red/K20408%09%23FFFFFF,green/K09594%09%23FFFFFF,green/K03158%09%23FFFFFF,red/K03068%09%23FFFFFF,green/K14995%09%23FFFFFF,green/K16172%09%23FFFFFF,green/K00445%09%23FFFFFF,red/K20409%09%23FFFFFF,red/K20405%09%23FFFFFF,green/K20401%09%2…
mmu04371	Apelin signaling pathway	Environmental Information Processing	Signal transduction	18	18	36	135	0.262314	0.456513	ENSMUSG00000027669(Gnb4),ENSMUSG00000055723(Rras2),ENSMUSG00000020826(Nos2),ENSMUSG00000001175(Calm1),ENSMUSG00000024960(Plcb3),ENSMUSG00000020573(Pik3cg),ENSMUSG00000027276(Jag1),ENSMUSG00000020901(Pik3r5),ENSMUSG00000020611(Gna13),ENSMUSG00000003123(Lipe),ENSMUSG00000029064(Gnb1),ENSMUSG00000004936(Map2k1),ENSMUSG00000024639(Gnaq),ENSMUSG00000036402(Gng12),ENSMUSG00000046207(Pik3r6),ENSMUSG0000…	ENSMUSG00000042644(Itpr3),ENSMUSG00000070348(Ccnd1),ENSMUSG00000005580(Adcy9),ENSMUSG00000038607(Gng10),ENSMUSG00000001419(Mef2d),ENSMUSG00000020654(Adcy3),ENSMUSG00000007613(Tgfbr1),ENSMUSG00000032192(Gnb5),ENSMUSG00000005583(Mef2c),ENSMUSG00000031659(Adcy7),ENSMUSG00000005469(Prkaca),ENSMUSG00000040061(Plcb2),ENSMUSG00000030671(Pde3b),ENSMUSG00000054640(Slc8a1),ENSMUSG00000028944(Prkag2),ENSMUS…	http://www.kegg.jp/kegg-bin/show_pathway?map04371/K04536%09%23FFFFFF,red/K04347%09%23FFFFFF,red/K04630%09%23FFFFFF,red/K06052%09%23FFFFFF,red/K04538%09%23FFFFFF,red/K04454%09%23FFFFFF,green/K04543%09%23FFFFFF,green/K08043%09%23FFFFFF,green/K07830%09%23FFFFFF,red/K07188%09%23FFFFFF,red/K04345%09%23FFFFFF,green/K21289%09%23FFFFFF,red/K05849%09%23FFFFFF,green/K04639%09%23FFFFFF,red/K04634%09%23FFFFF…
mmu00790	Folate biosynthesis	Metabolism	Metabolism of cofactors and vitamins	3	5	8	26	0.272879	0.47229	ENSMUSG00000047454(Gphn),ENSMUSG00000064120(Mocs1),ENSMUSG00000037580(Gch1)	ENSMUSG00000009566(Fpgs),ENSMUSG00000021707(Dhfr),ENSMUSG00000039616(Mocos),ENSMUSG00000051483(Cbr1),ENSMUSG00000033735(Spr)	http://www.kegg.jp/kegg-bin/show_pathway?map00790/K01930%09%23FFFFFF,green/K00287%09%23FFFFFF,green/K00079%09%23FFFFFF,green/K00072%09%23FFFFFF,green/K20967%09%23FFFFFF,red/K15631%09%23FFFFFF,green/K15376%09%23FFFFFF,red/K01495%09%23FFFFFF,red/
mmu04925	Aldosterone synthesis and secretion	Organismal Systems	Endocrine system	13	14	27	100	0.274623	0.472711	ENSMUSG00000053007(Creb5),ENSMUSG00000030653(Gm45837),ENSMUSG00000026463(Atp2b4),ENSMUSG00000003123(Lipe),ENSMUSG00000024070(Prkd3),ENSMUSG00000024639(Gnaq),ENSMUSG00000026826(Nr4a2),ENSMUSG00000052889(Prkcb),ENSMUSG00000024960(Plcb3),ENSMUSG00000001175(Calm1),ENSMUSG00000053819(Camk2d),ENSMUSG00000032193(Ldlr),ENSMUSG00000023034(Nr4a1)	ENSMUSG00000030272(Camk1),ENSMUSG00000005469(Prkaca),ENSMUSG00000031659(Adcy7),ENSMUSG00000005580(Adcy9),ENSMUSG00000035735(Dagla),ENSMUSG00000037936(Scarb1),ENSMUSG00000041187(Prkd2),ENSMUSG00000020654(Adcy3),ENSMUSG00000027931(Npr1),ENSMUSG00000042644(Itpr3),ENSMUSG00000039206(Daglb),ENSMUSG00000021820(Camk2g),ENSMUSG00000040061(Plcb2),ENSMUSG00000038648(Creb3l2)	http://www.kegg.jp/kegg-bin/show_pathway?map04925/K08794%09%23FFFFFF,green/K04515%09%23FFFFFF,purple/K02183%09%23FFFFFF,red/K08047%09%23FFFFFF,green/K07188%09%23FFFFFF,red/K08558%09%23FFFFFF,red/K12323%09%23FFFFFF,green/K09048%09%23FFFFFF,green/K04345%09%23FFFFFF,green/K04634%09%23FFFFFF,red/K08049%09%23FFFFFF,green/K05850%09%23FFFFFF,red/K08043%09%23FFFFFF,green/K05858%09%23FFFFFF,purple/K04960%…
mmu04141	Protein processing in endoplasmic reticulum	Genetic Information Processing	Folding, sorting and degradation	31	12	43	164	0.279024	0.477676	ENSMUSG00000031770(Herpud1),ENSMUSG00000003746(Man1a),ENSMUSG00000026942(Traf2),ENSMUSG00000024079(Eif2ak2),ENSMUSG00000021831(Ero1a),ENSMUSG00000025887(Casp12),ENSMUSG00000090877(Hspa1b),ENSMUSG00000040435(Ppp1r15a),ENSMUSG00000015839(Nfe2l2),ENSMUSG00000028410(Dnaja1),ENSMUSG00000027422(Rrbp1),ENSMUSG00000028277(Ube2j1),ENSMUSG00000078578(Ube2d3),ENSMUSG00000027828(Ssr3),ENSMUSG00000021270(Hsp9…	ENSMUSG00000029616(Erp29),ENSMUSG00000042104(Uggt2),ENSMUSG00000057069(Ero1b),ENSMUSG00000005102(Eif2ak4),ENSMUSG00000031668(Eif2ak3),ENSMUSG00000023826(Prkn),ENSMUSG00000029657(Hsph1),ENSMUSG00000074093(Svip),ENSMUSG00000059970(Hspa2),ENSMUSG00000037306(Man1c1),ENSMUSG00000042215(Bag2),ENSMUSG00000039474(Wfs1)	http://www.kegg.jp/kegg-bin/show_pathway?map04141/K04523%09%23FFFFFF,red/K09503%09%23FFFFFF,red/K09556%09%23FFFFFF,green/K14014%09%23FFFFFF,green/K14021%09%23FFFFFF,red/K16195%09%23FFFFFF,red/K14000%09%23FFFFFF,red/K14026%09%23FFFFFF,red/K14007%09%23FFFFFF,red/K01230%09%23FFFFFF,purple/K08860%09%23FFFFFF,green/K05638%09%23FFFFFF,red/K09502%09%23FFFFFF,red/K13251%09%23FFFFFF,red/K09490%09%23FFFFFF…
mmu04915	Estrogen signaling pathway	Organismal Systems	Endocrine system	20	15	35	133	0.295654	0.503411	ENSMUSG00000004936(Map2k1),ENSMUSG00000024639(Gnaq),ENSMUSG00000024222(Fkbp5),ENSMUSG00000021948(Prkcd),ENSMUSG00000001175(Calm1),ENSMUSG00000024960(Plcb3),ENSMUSG00000024241(Sos1),ENSMUSG00000021270(Hsp90aa1),ENSMUSG00000017737(Mmp9),ENSMUSG00000091971(Hspa1a),ENSMUSG00000028698(Pik3r3),ENSMUSG00000027646(Src),ENSMUSG00000020122(Egfr),ENSMUSG00000053007(Creb5),ENSMUSG00000090877(Hspa1b),ENSMUSG0…	ENSMUSG00000020654(Adcy3),ENSMUSG00000021250(Fos),ENSMUSG00000042644(Itpr3),ENSMUSG00000035109(Shc4),ENSMUSG00000052684(Jun),ENSMUSG00000030357(Fkbp4),ENSMUSG00000038648(Creb3l2),ENSMUSG00000020647(Ncoa1),ENSMUSG00000031834(Pik3r2),ENSMUSG00000040061(Plcb2),ENSMUSG00000059970(Hspa2),ENSMUSG00000031659(Adcy7),ENSMUSG00000005469(Prkaca),ENSMUSG00000020312(Shc2),ENSMUSG00000005580(Adcy9)	http://www.kegg.jp/kegg-bin/show_pathway?map04915/K04634%09%23FFFFFF,red/K05858%09%23FFFFFF,purple/K06068%09%23FFFFFF,red/K02649%09%23FFFFFF,purple/K03283%09%23FFFFFF,purple/K04368%09%23FFFFFF,red/K08043%09%23FFFFFF,green/K04379%09%23FFFFFF,green/K08047%09%23FFFFFF,green/K08523%09%23FFFFFF,red/K09048%09%23FFFFFF,green/K08049%09%23FFFFFF,green/K04361%09%23FFFFFF,red/K09101%09%23FFFFFF,green/K01403…
mmu00520	Amino sugar and nucleotide sugar metabolism	Metabolism	Carbohydrate metabolism	4	10	14	50	0.302365	0.512069	ENSMUSG00000000628(Hk2),ENSMUSG00000026670(Uap1),ENSMUSG00000048065(Cyb5r2),ENSMUSG00000070284(Gmppb)	ENSMUSG00000028479(Gne),ENSMUSG00000022474(Pmm1),ENSMUSG00000028621(Cyb5rl),ENSMUSG00000036820(Amdhd2),ENSMUSG00000030282(Cmas),ENSMUSG00000029209(Gnpda2),ENSMUSG00000020766(Galk1),ENSMUSG00000033703(Fcsk),ENSMUSG00000052102(Gnpda1),ENSMUSG00000034744(Nagk)	http://www.kegg.jp/kegg-bin/show_pathway?map00520/K17497%09%23FFFFFF,green/K00849%09%23FFFFFF,green/K00844%09%23FFFFFF,red/K00884%09%23FFFFFF,green/K01443%09%23FFFFFF,green/K00966%09%23FFFFFF,red/K02564%09%23FFFFFF,green/K21749%09%23FFFFFF,green/K05305%09%23FFFFFF,green/K00326%09%23FFFFFF,purple/K00972%09%23FFFFFF,red/K12409%09%23FFFFFF,green/
mmu04550	Signaling pathways regulating pluripotency of stem cells	Cellular Processes	Cellular community - eukaryotes	22	13	35	134	0.313108	0.525103	ENSMUSG00000004936(Map2k1),ENSMUSG00000038518(Jarid2),ENSMUSG00000045005(Fzd5),ENSMUSG00000041324(Inhba),ENSMUSG00000052155(Acvr2a),ENSMUSG00000000532(Acvr1b),ENSMUSG00000024789(Jak2),ENSMUSG00000026836(Acvr1),ENSMUSG00000022346(Myc),ENSMUSG00000053137(Mapk11),ENSMUSG00000024805(Pcgf5),ENSMUSG00000033623(Pcgf3),ENSMUSG00000027660(Skil),ENSMUSG00000031540(Kat6a),ENSMUSG00000039936(Pik3cd),ENSMUSG0…	ENSMUSG00000031565(Fgfr1),ENSMUSG00000020888(Dvl2),ENSMUSG00000018537(Pcgf2),ENSMUSG00000038872(Zfhx3),ENSMUSG00000025050(Pcgf6),ENSMUSG00000020167(Tcf3),ENSMUSG00000015697(Setdb1),ENSMUSG00000042745(Id1),ENSMUSG00000061393(Acvr2b),ENSMUSG00000021756(Il6st),ENSMUSG00000027796(Smad9),ENSMUSG00000031383(Dusp9),ENSMUSG00000031834(Pik3r2)	http://www.kegg.jp/kegg-bin/show_pathway?map04550/K11478%09%23FFFFFF,red/K09063%09%23FFFFFF,green/K11305%09%23FFFFFF,red/K05419%09%23FFFFFF,red/K05060%09%23FFFFFF,green/K02375%09%23FFFFFF,red/K02432%09%23FFFFFF,red/K18498%09%23FFFFFF,green/K11460%09%23FFFFFF,green/K04368%09%23FFFFFF,red/K04441%09%23FFFFFF,red/K04667%09%23FFFFFF,red/K18499%09%23FFFFFF,red/K04680%09%23FFFFFF,green/K00922%09%23FFFFF…
mmu04728	Dopaminergic synapse	Organismal Systems	Nervous system	20	14	34	130	0.313395	0.525103	ENSMUSG00000026626(Ppp2r5a),ENSMUSG00000036402(Gng12),ENSMUSG00000053819(Camk2d),ENSMUSG00000020349(Ppp2ca),ENSMUSG00000000001(Gnai3),ENSMUSG00000021936(Mapk8),ENSMUSG00000009630(Ppp2cb),ENSMUSG00000022092(Ppp3cc),ENSMUSG00000014956(Ppp1cb),ENSMUSG00000041769(Ppp2r2d),ENSMUSG00000052889(Prkcb),ENSMUSG00000027669(Gnb4),ENSMUSG00000053137(Mapk11),ENSMUSG00000001175(Calm1),ENSMUSG00000024960(Plcb3),…	ENSMUSG00000021820(Camk2g),ENSMUSG00000040061(Plcb2),ENSMUSG00000038648(Creb3l2),ENSMUSG00000043004(Gng2),ENSMUSG00000026764(Kif5c),ENSMUSG00000048240(Gng7),ENSMUSG00000042644(Itpr3),ENSMUSG00000021250(Fos),ENSMUSG00000034656(Cacna1a),ENSMUSG00000038607(Gng10),ENSMUSG00000074657(Kif5a),ENSMUSG00000000326(Comt),ENSMUSG00000032192(Gnb5),ENSMUSG00000005469(Prkaca)	http://www.kegg.jp/kegg-bin/show_pathway?map04728/K04539%09%23FFFFFF,green/K04344%09%23FFFFFF,green/K04382%09%23FFFFFF,red/K04545%09%23FFFFFF,green/K05858%09%23FFFFFF,purple/K04440%09%23FFFFFF,red/K04354%09%23FFFFFF,red/K04543%09%23FFFFFF,green/K04538%09%23FFFFFF,red/K10396%09%23FFFFFF,purple/K04348%09%23FFFFFF,red/K06269%09%23FFFFFF,red/K04347%09%23FFFFFF,red/K04515%09%23FFFFFF,purple/K00545%09%…
mmu00072	Synthesis and degradation of ketone bodies	Metabolism	Lipid metabolism	2	2	4	12	0.320615	0.534359	ENSMUSG00000093930(Hmgcs1),ENSMUSG00000062480(Acat3)	ENSMUSG00000046598(Bdh1),ENSMUSG00000028672(Hmgcl)	http://www.kegg.jp/kegg-bin/show_pathway?map00072/K00626%09%23FFFFFF,red/K01640%09%23FFFFFF,green/K01641%09%23FFFFFF,red/K00019%09%23FFFFFF,green/
mmu05014	Amyotrophic lateral sclerosis (ALS)	Human Diseases	Neurodegenerative diseases	13	1	14	51	0.331464	0.549533	ENSMUSG00000002307(Daxx),ENSMUSG00000053137(Mapk11),ENSMUSG00000028599(Tnfrsf1b),ENSMUSG00000022092(Ppp3cc),ENSMUSG00000063694(Cycs),ENSMUSG00000004446(Bid),ENSMUSG00000025887(Casp12),ENSMUSG00000017831(Rab5a),ENSMUSG00000019979(Apaf1),ENSMUSG00000025888(Casp1),ENSMUSG00000071369(Map3k5),ENSMUSG00000030341(Tnfrsf1a),ENSMUSG00000024401(Tnf)	ENSMUSG00000028914(Casp9)	http://www.kegg.jp/kegg-bin/show_pathway?map05014/K07887%09%23FFFFFF,red/K04741%09%23FFFFFF,red/K05141%09%23FFFFFF,red/K04426%09%23FFFFFF,red/K01370%09%23FFFFFF,red/K03156%09%23FFFFFF,red/K03158%09%23FFFFFF,red/K08738%09%23FFFFFF,red/K04441%09%23FFFFFF,red/K04726%09%23FFFFFF,red/K02084%09%23FFFFFF,red/K04399%09%23FFFFFF,green/K02308%09%23FFFFFF,red/K04348%09%23FFFFFF,red/
mmu00220	Arginine biosynthesis	Metabolism	Amino acid metabolism	3	3	6	20	0.342858	0.565446	ENSMUSG00000076441(Ass1),ENSMUSG00000026103(Gls),ENSMUSG00000020826(Nos2)	ENSMUSG00000026473(Glul),ENSMUSG00000025190(Got1),ENSMUSG00000022546(Gpt)	http://www.kegg.jp/kegg-bin/show_pathway?map00220/K01425%09%23FFFFFF,red/K01940%09%23FFFFFF,red/K01915%09%23FFFFFF,green/K14454%09%23FFFFFF,green/K00814%09%23FFFFFF,green/K13241%09%23FFFFFF,red/
mmu00534	Glycosaminoglycan biosynthesis - heparan sulfate / heparin	Metabolism	Glycan biosynthesis and metabolism	2	5	7	24	0.348682	0.572056	ENSMUSG00000070407(Hs3st3b1),ENSMUSG00000061731(Ext1)	ENSMUSG00000021504(B4galt7),ENSMUSG00000021978(Extl3),ENSMUSG00000040151(Hs2st1),ENSMUSG00000054008(Ndst1),ENSMUSG00000030657(Xylt1)	http://www.kegg.jp/kegg-bin/show_pathway?map00534/K00771%09%23FFFFFF,green/K02366%09%23FFFFFF,red/K02513%09%23FFFFFF,green/K07809%09%23FFFFFF,red/K02576%09%23FFFFFF,green/K02370%09%23FFFFFF,green/K00733%09%23FFFFFF,green/
mmu04730	Long-term depression	Organismal Systems	Nervous system	12	4	16	60	0.361297	0.589682	ENSMUSG00000020349(Ppp2ca),ENSMUSG00000000001(Gnai3),ENSMUSG00000009630(Ppp2cb),ENSMUSG00000020611(Gna13),ENSMUSG00000042228(Lyn),ENSMUSG00000056220(Pla2g4a),ENSMUSG00000033847(Pla2g4c),ENSMUSG00000052889(Prkcb),ENSMUSG00000002413(Braf),ENSMUSG00000024960(Plcb3),ENSMUSG00000004936(Map2k1),ENSMUSG00000024639(Gnaq)	ENSMUSG00000040061(Plcb2),ENSMUSG00000042644(Itpr3),ENSMUSG00000034656(Cacna1a),ENSMUSG00000000149(Gna12)	http://www.kegg.jp/kegg-bin/show_pathway?map04730/K04365%09%23FFFFFF,red/K05858%09%23FFFFFF,purple/K04639%09%23FFFFFF,red/K04368%09%23FFFFFF,red/K04630%09%23FFFFFF,red/K19662%09%23FFFFFF,red/K05854%09%23FFFFFF,red/K16342%09%23FFFFFF,red/K04344%09%23FFFFFF,green/K04346%09%23FFFFFF,green/K04960%09%23FFFFFF,green/K04382%09%23FFFFFF,red/K04634%09%23FFFFFF,red/
mmu04390	Hippo signaling pathway	Environmental Information Processing	Signal transduction	22	16	38	150	0.381543	0.617718	ENSMUSG00000022052(Ppp2r2a),ENSMUSG00000021067(Sav1),ENSMUSG00000045005(Fzd5),ENSMUSG00000043131(Mob1a),ENSMUSG00000041769(Ppp2r2d),ENSMUSG00000020271(Fbxw11),ENSMUSG00000062825(Actg1),ENSMUSG00000029378(Areg),ENSMUSG00000029580(Actb),ENSMUSG00000006262(Mob1b),ENSMUSG00000022346(Myc),ENSMUSG00000009630(Ppp2cb),ENSMUSG00000037411(Serpine1),ENSMUSG00000000184(Ccnd2),ENSMUSG00000014956(Ppp1cb),ENSMU…	ENSMUSG00000032440(Tgfbr2),ENSMUSG00000021253(Tgfb3),ENSMUSG00000041688(Amot),ENSMUSG00000018849(Wwc1),ENSMUSG00000007613(Tgfbr1),ENSMUSG00000070348(Ccnd1),ENSMUSG00000002083(Bbc3),ENSMUSG00000022676(Snai2),ENSMUSG00000020888(Dvl2),ENSMUSG00000017716(Birc5),ENSMUSG00000056214(Pard6g),ENSMUSG00000022178(Ajuba),ENSMUSG00000022433(Csnk1e),ENSMUSG00000042745(Id1),ENSMUSG00000005699(Pard6a),ENSMUSG000…	http://www.kegg.jp/kegg-bin/show_pathway?map04390/K03982%09%23FFFFFF,red/K16682%09%23FFFFFF,green/K04412%09%23FFFFFF,red/K06685%09%23FFFFFF,red/K05706%09%23FFFFFF,green/K13377%09%23FFFFFF,green/K04503%09%23FFFFFF,green/K08731%09%23FFFFFF,green/K02353%09%23FFFFFF,green/K05692%09%23FFFFFF,red/K04377%09%23FFFFFF,red/K09782%09%23FFFFFF,red/K08791%09%23FFFFFF,red/K10132%09%23FFFFFF,green/K04674%09%23F…
mmu03450	Non-homologous end-joining	Genetic Information Processing	Replication and repair	0	4	4	13	0.382397	0.617718	-	ENSMUSG00000020380(Rad50),ENSMUSG00000025218(Poll),ENSMUSG00000022672(Prkdc),ENSMUSG00000022471(Xrcc6)	http://www.kegg.jp/kegg-bin/show_pathway?map03450/K10866%09%23FFFFFF,green/K06642%09%23FFFFFF,green/K03512%09%23FFFFFF,green/K10884%09%23FFFFFF,green/
mmu00450	Selenocompound metabolism	Metabolism	Metabolism of other amino acids	2	3	5	17	0.38807	0.620122	ENSMUSG00000028179(Cth),ENSMUSG00000020250(Txnrd1)	ENSMUSG00000063179(Pstk),ENSMUSG00000039648(Kyat1),ENSMUSG00000021311(Mtr)	http://www.kegg.jp/kegg-bin/show_pathway?map00450/K22182%09%23FFFFFF,red/K00548%09%23FFFFFF,green/K10837%09%23FFFFFF,green/K00816%09%23FFFFFF,green/K01758%09%23FFFFFF,red/
mmu04142	Lysosome	Cellular Processes	Transport and catabolism	8	23	31	122	0.39165	0.620122	ENSMUSG00000030560(Ctsc),ENSMUSG00000001348(Acp5),ENSMUSG00000023030(Slc11a2),ENSMUSG00000015474(Ppt2),ENSMUSG00000022125(Cln5),ENSMUSG00000007458(M6pr),ENSMUSG00000021686(Ap3b1),ENSMUSG00000002103(Acp2)	ENSMUSG00000021003(Galc),ENSMUSG00000028238(Atp6v0d2),ENSMUSG00000020604(Arsg),ENSMUSG00000049624(Slc17a5),ENSMUSG00000028164(Manba),ENSMUSG00000029408(Abcb9),ENSMUSG00000019302(Atp6v0a1),ENSMUSG00000024413(Npc1),ENSMUSG00000009090(Ap1b1),ENSMUSG00000019518(Ap4m1),ENSMUSG00000031903(Pla2g15),ENSMUSG00000033540(Idua),ENSMUSG00000030872(Gga2),ENSMUSG00000004567(Mcoln1),ENSMUSG00000022453(Naga),ENSM…	http://www.kegg.jp/kegg-bin/show_pathway?map04142/K21398%09%23FFFFFF,red/K05642%09%23FFFFFF,green/K12404%09%23FFFFFF,green/K12301%09%23FFFFFF,green/K12402%09%23FFFFFF,green/K02146%09%23FFFFFF,green/K01275%09%23FFFFFF,red/K04992%09%23FFFFFF,green/K06129%09%23FFFFFF,green/K12381%09%23FFFFFF,green/K05656%09%23FFFFFF,green/K12386%09%23FFFFFF,green/K02154%09%23FFFFFF,green/K01192%09%23FFFFFF,green/K01…
mmu04340	Hedgehog signaling pathway	Environmental Information Processing	Signal transduction	6	7	13	49	0.392092	0.620122	ENSMUSG00000020271(Fbxw11),ENSMUSG00000042249(Grk3),ENSMUSG00000024576(Csnk1a1),ENSMUSG00000073563(Csnk1g3),ENSMUSG00000000184(Ccnd2),ENSMUSG00000004364(Cul3)	ENSMUSG00000018909(Arrb1),ENSMUSG00000050382(Kif7),ENSMUSG00000070348(Ccnd1),ENSMUSG00000005469(Prkaca),ENSMUSG00000001761(Smo),ENSMUSG00000022433(Csnk1e),ENSMUSG00000018395(Kif3a)	http://www.kegg.jp/kegg-bin/show_pathway?map04340/K03362%09%23FFFFFF,red/K08957%09%23FFFFFF,red/K04439%09%23FFFFFF,green/K04503%09%23FFFFFF,green/K04345%09%23FFFFFF,green/K10394%09%23FFFFFF,green/K08958%09%23FFFFFF,red/K03869%09%23FFFFFF,red/K18806%09%23FFFFFF,green/K10151%09%23FFFFFF,red/K06226%09%23FFFFFF,green/K00910%09%23FFFFFF,red/K08960%09%23FFFFFF,green/
mmu00860	Porphyrin and chlorophyll metabolism	Metabolism	Metabolism of cofactors and vitamins	3	8	11	41	0.39345	0.620122	ENSMUSG00000040466(Blvrb),ENSMUSG00000003617(Cp),ENSMUSG00000005413(Hmox1)	ENSMUSG00000022742(Cpox),ENSMUSG00000028684(Urod),ENSMUSG00000024588(Fech),ENSMUSG00000028393(Alad),ENSMUSG00000030979(Uros),ENSMUSG00000029575(Mmab),ENSMUSG00000062729(Ppox),ENSMUSG00000032126(Hmbs)	http://www.kegg.jp/kegg-bin/show_pathway?map00860/K00228%09%23FFFFFF,green/K13624%09%23FFFFFF,red/K05901%09%23FFFFFF,red/K01772%09%23FFFFFF,green/K00510%09%23FFFFFF,red/K01719%09%23FFFFFF,green/K00798%09%23FFFFFF,green/K01698%09%23FFFFFF,green/K01749%09%23FFFFFF,green/K00231%09%23FFFFFF,green/K01599%09%23FFFFFF,green/
mmu03020	RNA polymerase	Genetic Information Processing	Transcription	2	6	8	29	0.393728	0.620122	ENSMUSG00000000776(Polr3d),ENSMUSG00000031783(Polr2c)	ENSMUSG00000004667(Polr2e),ENSMUSG00000005198(Polr2a),ENSMUSG00000035834(Polr3g),ENSMUSG00000028104(Polr3gl),ENSMUSG00000019738(Polr2i),ENSMUSG00000022476(Polr3h)	http://www.kegg.jp/kegg-bin/show_pathway?map03020/K03026%09%23FFFFFF,red/K03017%09%23FFFFFF,green/K03011%09%23FFFFFF,red/K03013%09%23FFFFFF,green/K03024%09%23FFFFFF,green/K03022%09%23FFFFFF,green/K03006%09%23FFFFFF,green/
mmu04022	cGMP-PKG signaling pathway	Environmental Information Processing	Signal transduction	20	21	41	164	0.411872	0.645471	ENSMUSG00000020573(Pik3cg),ENSMUSG00000020901(Pik3r5),ENSMUSG00000020611(Gna13),ENSMUSG00000020580(Rock2),ENSMUSG00000030653(Gm45837),ENSMUSG00000024639(Gnaq),ENSMUSG00000053007(Creb5),ENSMUSG00000004936(Map2k1),ENSMUSG00000008892(Vdac3),ENSMUSG00000024960(Plcb3),ENSMUSG00000024290(Rock1),ENSMUSG00000030403(Vasp),ENSMUSG00000022122(Ednrb),ENSMUSG00000001175(Calm1),ENSMUSG00000022092(Ppp3cc),ENSMU…	ENSMUSG00000005534(Insr),ENSMUSG00000023079(Gtf2ird1),ENSMUSG00000020654(Adcy3),ENSMUSG00000001419(Mef2d),ENSMUSG00000031659(Adcy7),ENSMUSG00000033016(Nfatc1),ENSMUSG00000005583(Mef2c),ENSMUSG00000026360(Rgs2),ENSMUSG00000000149(Gna12),ENSMUSG00000005580(Adcy9),ENSMUSG00000042644(Itpr3),ENSMUSG00000027931(Npr1),ENSMUSG00000045875(Adra1a),ENSMUSG00000027544(Nfatc2),ENSMUSG00000060261(Gtf2i),ENSMUS…	http://www.kegg.jp/kegg-bin/show_pathway?map04022/K04630%09%23FFFFFF,red/K04960%09%23FFFFFF,green/K05849%09%23FFFFFF,green/K13296%09%23FFFFFF,green/K04454%09%23FFFFFF,green/K04198%09%23FFFFFF,red/K05858%09%23FFFFFF,purple/K03121%09%23FFFFFF,green/K06270%09%23FFFFFF,red/K04527%09%23FFFFFF,green/K15041%09%23FFFFFF,red/K07187%09%23FFFFFF,green/K09262%09%23FFFFFF,green/K08047%09%23FFFFFF,green/K04446…
mmu00270	Cysteine and methionine metabolism	Metabolism	Amino acid metabolism	3	10	13	50	0.423618	0.660592	ENSMUSG00000053907(Mat2a),ENSMUSG00000027610(Gss),ENSMUSG00000028179(Cth)	ENSMUSG00000004996(Mri1),ENSMUSG00000071711(Mpst),ENSMUSG00000044986(Tst),ENSMUSG00000039648(Kyat1),ENSMUSG00000027478(Dnmt3b),ENSMUSG00000021311(Mtr),ENSMUSG00000004099(Dnmt1),ENSMUSG00000020661(Dnmt3a),ENSMUSG00000025190(Got1),ENSMUSG00000020629(Adi1)	http://www.kegg.jp/kegg-bin/show_pathway?map00270/K08963%09%23FFFFFF,green/K01758%09%23FFFFFF,red/K00558%09%23FFFFFF,green/K17399%09%23FFFFFF,green/K14454%09%23FFFFFF,green/K00816%09%23FFFFFF,green/K17398%09%23FFFFFF,green/K00548%09%23FFFFFF,green/K21456%09%23FFFFFF,red/K08967%09%23FFFFFF,green/K01011%09%23FFFFFF,green/K00789%09%23FFFFFF,red/
mmu00565	Ether lipid metabolism	Metabolism	Lipid metabolism	9	3	12	46	0.425761	0.660664	ENSMUSG00000021759(Plpp1),ENSMUSG00000023913(Pla2g7),ENSMUSG00000060675(Plaat3),ENSMUSG00000033847(Pla2g4c),ENSMUSG00000040774(Cept1),ENSMUSG00000033192(Lpcat2),ENSMUSG00000056220(Pla2g4a),ENSMUSG00000045282(Tmem86b),ENSMUSG00000020745(Pafah1b1)	ENSMUSG00000028751(Pla2g2e),ENSMUSG00000027999(Pla2g12a),ENSMUSG00000005447(Pafah1b3)	http://www.kegg.jp/kegg-bin/show_pathway?map00565/K01080%09%23FFFFFF,red/K13510%09%23FFFFFF,red/K16817%09%23FFFFFF,red/K16342%09%23FFFFFF,red/K18575%09%23FFFFFF,red/K13644%09%23FFFFFF,red/K16795%09%23FFFFFF,green/K16794%09%23FFFFFF,red/K01062%09%23FFFFFF,red/K01047%09%23FFFFFF,green/
mmu05032	Morphine addiction	Human Diseases	Substance dependence	9	14	23	91	0.427902	0.660731	ENSMUSG00000000001(Gnai3),ENSMUSG00000036402(Gng12),ENSMUSG00000023868(Pde10a),ENSMUSG00000042249(Grk3),ENSMUSG00000052889(Prkcb),ENSMUSG00000027669(Gnb4),ENSMUSG00000028525(Pde4b),ENSMUSG00000030653(Gm45837),ENSMUSG00000029064(Gnb1)	ENSMUSG00000030671(Pde3b),ENSMUSG00000048240(Gng7),ENSMUSG00000043004(Gng2),ENSMUSG00000038607(Gng10),ENSMUSG00000019990(Pde7b),ENSMUSG00000034656(Cacna1a),ENSMUSG00000018909(Arrb1),ENSMUSG00000005580(Adcy9),ENSMUSG00000005469(Prkaca),ENSMUSG00000031659(Adcy7),ENSMUSG00000032192(Gnb5),ENSMUSG00000004347(Pde1c),ENSMUSG00000021699(Pde4d),ENSMUSG00000020654(Adcy3)	http://www.kegg.jp/kegg-bin/show_pathway?map05032/K08047%09%23FFFFFF,green/K04439%09%23FFFFFF,green/K08049%09%23FFFFFF,green/K00910%09%23FFFFFF,red/K13296%09%23FFFFFF,green/K19662%09%23FFFFFF,red/K18438%09%23FFFFFF,red/K04545%09%23FFFFFF,green/K04536%09%23FFFFFF,red/K13293%09%23FFFFFF,purple/K04539%09%23FFFFFF,green/K13755%09%23FFFFFF,green/K04538%09%23FFFFFF,red/K04345%09%23FFFFFF,green/K18436%0…
mmu04934	Cushing's syndrome	Human Diseases	Endocrine and metabolic diseases	20	20	40	161	0.431248	0.662649	ENSMUSG00000052681(Rap1b),ENSMUSG00000004936(Map2k1),ENSMUSG00000019256(Ahr),ENSMUSG00000053007(Creb5),ENSMUSG00000020122(Egfr),ENSMUSG00000024639(Gnaq),ENSMUSG00000045005(Fzd5),ENSMUSG00000002413(Braf),ENSMUSG00000024960(Plcb3),ENSMUSG00000023067(Cdkn1a),ENSMUSG00000073802(Cdkn2b),ENSMUSG00000040274(Cdk6),ENSMUSG00000044674(Fzd1),ENSMUSG00000068798(Rap1a),ENSMUSG00000016477(E2f3),ENSMUSG00000032…	ENSMUSG00000022105(Rb1),ENSMUSG00000018983(E2f2),ENSMUSG00000020654(Adcy3),ENSMUSG00000005469(Prkaca),ENSMUSG00000031659(Adcy7),ENSMUSG00000020888(Dvl2),ENSMUSG00000027490(E2f1),ENSMUSG00000070348(Ccnd1),ENSMUSG00000005580(Adcy9),ENSMUSG00000042644(Itpr3),ENSMUSG00000025358(Cdk2),ENSMUSG00000034379(Wdr5b),ENSMUSG00000027698(Nceh1),ENSMUSG00000028551(Cdkn2c),ENSMUSG00000006728(Cdk4),ENSMUSG0000003…	http://www.kegg.jp/kegg-bin/show_pathway?map04934/K05858%09%23FFFFFF,purple/K04365%09%23FFFFFF,red/K04361%09%23FFFFFF,red/K06620%09%23FFFFFF,red/K06622%09%23FFFFFF,green/K09048%09%23FFFFFF,green/K09047%09%23FFFFFF,red/K12473%09%23FFFFFF,red/K09093%09%23FFFFFF,red/K08049%09%23FFFFFF,green/K04630%09%23FFFFFF,red/K04353%09%23FFFFFF,red/K04465%09%23FFFFFF,red/K06618%09%23FFFFFF,green/K04345%09%23FFFF…
mmu00511	Other glycan degradation	Metabolism	Glycan biosynthesis and metabolism	0	5	5	18	0.441593	0.674796	-	ENSMUSG00000028467(Gba2),ENSMUSG00000039307(Hexdc),ENSMUSG00000033857(Engase),ENSMUSG00000028673(Fuca1),ENSMUSG00000028164(Manba)	http://www.kegg.jp/kegg-bin/show_pathway?map00511/K17108%09%23FFFFFF,green/K01227%09%23FFFFFF,green/K01206%09%23FFFFFF,green/K01192%09%23FFFFFF,green/K14459%09%23FFFFFF,green/
mmu00061	Fatty acid biosynthesis	Metabolism	Lipid metabolism	3	1	4	14	0.443437	0.674796	ENSMUSG00000024981(Acsl5),ENSMUSG00000031278(Acsl4),ENSMUSG00000018796(Acsl1)	ENSMUSG00000042010(Acacb)	http://www.kegg.jp/kegg-bin/show_pathway?map00061/K01897%09%23FFFFFF,red/K01946%09%23FFFFFF,green/
mmu04350	TGF-beta signaling pathway	Environmental Information Processing	Signal transduction	12	9	21	84	0.457092	0.691253	ENSMUSG00000052155(Acvr2a),ENSMUSG00000022346(Myc),ENSMUSG00000026836(Acvr1),ENSMUSG00000024290(Rock1),ENSMUSG00000073802(Cdkn2b),ENSMUSG00000027641(Rbl1),ENSMUSG00000024401(Tnf),ENSMUSG00000041324(Inhba),ENSMUSG00000000532(Acvr1b),ENSMUSG00000040152(Thbs1),ENSMUSG00000009630(Ppp2cb),ENSMUSG00000020349(Ppp2ca)	ENSMUSG00000007613(Tgfbr1),ENSMUSG00000032440(Tgfbr2),ENSMUSG00000024232(Bambi),ENSMUSG00000025880(Smad7),ENSMUSG00000027796(Smad9),ENSMUSG00000021253(Tgfb3),ENSMUSG00000036867(Smad6),ENSMUSG00000061393(Acvr2b),ENSMUSG00000042745(Id1)	http://www.kegg.jp/kegg-bin/show_pathway?map04350/K04388%09%23FFFFFF,green/K04675%09%23FFFFFF,red/K04685%09%23FFFFFF,red/K04667%09%23FFFFFF,red/K04680%09%23FFFFFF,green/K13377%09%23FFFFFF,green/K04377%09%23FFFFFF,red/K13596%09%23FFFFFF,purple/K13567%09%23FFFFFF,red/K16857%09%23FFFFFF,red/K04514%09%23FFFFFF,red/K04382%09%23FFFFFF,red/K03156%09%23FFFFFF,red/K10162%09%23FFFFFF,green/K04677%09%23FFFF…
mmu00510	N-Glycan biosynthesis	Metabolism	Glycan biosynthesis and metabolism	4	8	12	47	0.458641	0.691253	ENSMUSG00000026110(Mgat4a),ENSMUSG00000021065(Fut8),ENSMUSG00000024085(Man2a1),ENSMUSG00000003746(Man1a)	ENSMUSG00000026856(Dolpp1),ENSMUSG00000038886(Man2a2),ENSMUSG00000028413(B4galt1),ENSMUSG00000022885(St6gal1),ENSMUSG00000037306(Man1c1),ENSMUSG00000036155(Mgat5),ENSMUSG00000075470(Alg10b),ENSMUSG00000039740(Alg2)	http://www.kegg.jp/kegg-bin/show_pathway?map00510/K00738%09%23FFFFFF,red/K01230%09%23FFFFFF,purple/K00744%09%23FFFFFF,green/K00717%09%23FFFFFF,red/K03850%09%23FFFFFF,green/K07252%09%23FFFFFF,green/K00778%09%23FFFFFF,green/K07966%09%23FFFFFF,green/K03843%09%23FFFFFF,green/K01231%09%23FFFFFF,purple/
mmu04024	cAMP signaling pathway	Environmental Information Processing	Signal transduction	29	19	48	196	0.464232	0.696347	ENSMUSG00000024290(Rock1),ENSMUSG00000001175(Calm1),ENSMUSG00000055723(Rras2),ENSMUSG00000002413(Braf),ENSMUSG00000045502(Hcar2),ENSMUSG00000032849(Abcc4),ENSMUSG00000004936(Map2k1),ENSMUSG00000052681(Rap1b),ENSMUSG00000003123(Lipe),ENSMUSG00000020580(Rock2),ENSMUSG00000020178(Adora2a),ENSMUSG00000053819(Camk2d),ENSMUSG00000068798(Rap1a),ENSMUSG00000028698(Pik3r3),ENSMUSG00000014956(Ppp1cb),ENSMU…	ENSMUSG00000021250(Fos),ENSMUSG00000027931(Npr1),ENSMUSG00000037759(Ptger2),ENSMUSG00000020654(Adcy3),ENSMUSG00000038648(Creb3l2),ENSMUSG00000029098(Acox3),ENSMUSG00000031834(Pik3r2),ENSMUSG00000021820(Camk2g),ENSMUSG00000009621(Vav2),ENSMUSG00000052684(Jun),ENSMUSG00000005580(Adcy9),ENSMUSG00000033016(Nfatc1),ENSMUSG00000031659(Adcy7),ENSMUSG00000022469(Rapgef3),ENSMUSG00000005469(Prkaca),ENSMUS…	http://www.kegg.jp/kegg-bin/show_pathway?map04024/K04515%09%23FFFFFF,purple/K04365%09%23FFFFFF,red/K05850%09%23FFFFFF,red/K04353%09%23FFFFFF,red/K03914%09%23FFFFFF,red/K02183%09%23FFFFFF,red/K13296%09%23FFFFFF,green/K18438%09%23FFFFFF,red/K04735%09%23FFFFFF,red/K04266%09%23FFFFFF,red/K00922%09%23FFFFFF,red/K05254%09%23FFFFFF,green/K08402%09%23FFFFFF,red/K04345%09%23FFFFFF,green/K08047%09%23FFFFFF…
mmu04114	Oocyte meiosis	Cellular Processes	Cell growth and death	14	14	28	114	0.480734	0.715526	ENSMUSG00000029910(Mad2l1),ENSMUSG00000022285(Ywhaz),ENSMUSG00000020349(Ppp2ca),ENSMUSG00000022092(Ppp3cc),ENSMUSG00000009630(Ppp2cb),ENSMUSG00000020271(Fbxw11),ENSMUSG00000020849(Ywhae),ENSMUSG00000053819(Camk2d),ENSMUSG00000026626(Ppp2r5a),ENSMUSG00000020415(Pttg1),ENSMUSG00000014956(Ppp1cb),ENSMUSG00000001175(Calm1),ENSMUSG00000020300(Cpeb4),ENSMUSG00000004936(Map2k1)	ENSMUSG00000024370(Cdc23),ENSMUSG00000005580(Adcy9),ENSMUSG00000058290(Espl1),ENSMUSG00000025586(Cpeb1),ENSMUSG00000019773(Fbxo5),ENSMUSG00000005469(Prkaca),ENSMUSG00000031659(Adcy7),ENSMUSG00000027379(Bub1),ENSMUSG00000021820(Camk2g),ENSMUSG00000025358(Cdk2),ENSMUSG00000042644(Itpr3),ENSMUSG00000019942(Cdk1),ENSMUSG00000029554(Mad1l1),ENSMUSG00000020654(Adcy3)	http://www.kegg.jp/kegg-bin/show_pathway?map04114/K11584%09%23FFFFFF,red/K16197%09%23FFFFFF,red/K02087%09%23FFFFFF,green/K04515%09%23FFFFFF,purple/K02183%09%23FFFFFF,red/K06679%09%23FFFFFF,green/K04345%09%23FFFFFF,green/K02365%09%23FFFFFF,green/K04348%09%23FFFFFF,red/K08049%09%23FFFFFF,green/K04368%09%23FFFFFF,red/K02537%09%23FFFFFF,red/K02178%09%23FFFFFF,green/K04960%09%23FFFFFF,green/K03355%09%…
mmu03320	PPAR signaling pathway	Organismal Systems	Endocrine system	6	15	21	85	0.48156	0.715526	ENSMUSG00000028773(Fabp3),ENSMUSG00000030162(Olr1),ENSMUSG00000031278(Acsl4),ENSMUSG00000024981(Acsl5),ENSMUSG00000018796(Acsl1),ENSMUSG00000025059(Gk)	ENSMUSG00000025203(Scd2),ENSMUSG00000024600(Slc27a6),ENSMUSG00000031808(Slc27a1),ENSMUSG00000040618(Pck2),ENSMUSG00000000440(Pparg),ENSMUSG00000002289(Angptl4),ENSMUSG00000029098(Acox3),ENSMUSG00000028494(Plin2),ENSMUSG00000019874(Fabp7),ENSMUSG00000015846(Rxra),ENSMUSG00000062515(Fabp4),ENSMUSG00000022853(Ehhadh),ENSMUSG00000039656(Rxrb),ENSMUSG00000062908(Acadm),ENSMUSG00000026170(Cyp27a1)	http://www.kegg.jp/kegg-bin/show_pathway?map03320/K08525%09%23FFFFFF,green/K01897%09%23FFFFFF,red/K08763%09%23FFFFFF,red/K08753%09%23FFFFFF,green/K00864%09%23FFFFFF,red/K17284%09%23FFFFFF,green/K07514%09%23FFFFFF,green/K00232%09%23FFFFFF,green/K08749%09%23FFFFFF,green/K00507%09%23FFFFFF,green/K08752%09%23FFFFFF,red/K01596%09%23FFFFFF,green/K08767%09%23FFFFFF,green/K08524%09%23FFFFFF,green/K08530%…
mmu04962	Vasopressin-regulated water reabsorption	Organismal Systems	Excretory system	6	5	11	44	0.496454	0.732158	ENSMUSG00000017831(Rab5a),ENSMUSG00000018707(Dync1h1),ENSMUSG00000004771(Rab11a),ENSMUSG00000053007(Creb5),ENSMUSG00000027012(Dync1i2),ENSMUSG00000030220(Arhgdib)	ENSMUSG00000005469(Prkaca),ENSMUSG00000005580(Adcy9),ENSMUSG00000024253(Dync2li1),ENSMUSG00000038648(Creb3l2),ENSMUSG00000020654(Adcy3)	http://www.kegg.jp/kegg-bin/show_pathway?map04962/K10415%09%23FFFFFF,red/K07887%09%23FFFFFF,red/K10417%09%23FFFFFF,green/K09048%09%23FFFFFF,green/K07904%09%23FFFFFF,red/K08049%09%23FFFFFF,green/K10413%09%23FFFFFF,red/K04345%09%23FFFFFF,green/K12462%09%23FFFFFF,red/K09047%09%23FFFFFF,red/K08043%09%23FFFFFF,green/
mmu05412	Arrhythmogenic right ventricular cardiomyopathy (ARVC)	Human Diseases	Cardiovascular diseases	12	5	17	69	0.497403	0.732158	ENSMUSG00000078815(Cacng6),ENSMUSG00000053395(Cacng8),ENSMUSG00000050953(Gja1),ENSMUSG00000039115(Itga9),ENSMUSG00000062825(Actg1),ENSMUSG00000000555(Itga5),ENSMUSG00000042284(Itga1),ENSMUSG00000025809(Itgb1),ENSMUSG00000025321(Itgb8),ENSMUSG00000027009(Itga4),ENSMUSG00000003352(Cacnb3),ENSMUSG00000029580(Actb)	ENSMUSG00000020689(Itgb3),ENSMUSG00000039952(Dag1),ENSMUSG00000041957(Pkp2),ENSMUSG00000022817(Itgb5),ENSMUSG00000027111(Itga6)	http://www.kegg.jp/kegg-bin/show_pathway?map05412/K06588%09%23FFFFFF,green/K06485%09%23FFFFFF,green/K06265%09%23FFFFFF,green/K06484%09%23FFFFFF,red/K05692%09%23FFFFFF,red/K06493%09%23FFFFFF,green/K12642%09%23FFFFFF,green/K04871%09%23FFFFFF,red/K06591%09%23FFFFFF,red/K04873%09%23FFFFFF,red/K07372%09%23FFFFFF,red/K04864%09%23FFFFFF,red/K06480%09%23FFFFFF,red/K06585%09%23FFFFFF,red/K06483%09%23FFFFF…
mmu00620	Pyruvate metabolism	Metabolism	Carbohydrate metabolism	4	6	10	40	0.50213	0.735679	ENSMUSG00000062480(Acat3),ENSMUSG00000024892(Pcx),ENSMUSG00000020664(Dld),ENSMUSG00000032418(Me1)	ENSMUSG00000035637(Grhpr),ENSMUSG00000026687(Aldh9a1),ENSMUSG00000042010(Acacb),ENSMUSG00000027452(Acss1),ENSMUSG00000040618(Pck2),ENSMUSG00000024158(Hagh)	http://www.kegg.jp/kegg-bin/show_pathway?map00620/K01069%09%23FFFFFF,green/K00029%09%23FFFFFF,red/K01895%09%23FFFFFF,green/K00049%09%23FFFFFF,green/K01946%09%23FFFFFF,green/K01596%09%23FFFFFF,green/K00382%09%23FFFFFF,red/K01958%09%23FFFFFF,red/K00626%09%23FFFFFF,red/K00149%09%23FFFFFF,green/
mmu04720	Long-term potentiation	Organismal Systems	Nervous system	11	5	16	66	0.529582	0.772308	ENSMUSG00000022092(Ppp3cc),ENSMUSG00000004936(Map2k1),ENSMUSG00000052681(Rap1b),ENSMUSG00000024639(Gnaq),ENSMUSG00000001175(Calm1),ENSMUSG00000024960(Plcb3),ENSMUSG00000052889(Prkcb),ENSMUSG00000002413(Braf),ENSMUSG00000014956(Ppp1cb),ENSMUSG00000053819(Camk2d),ENSMUSG00000068798(Rap1a)	ENSMUSG00000022469(Rapgef3),ENSMUSG00000005469(Prkaca),ENSMUSG00000042644(Itpr3),ENSMUSG00000040061(Plcb2),ENSMUSG00000021820(Camk2g)	http://www.kegg.jp/kegg-bin/show_pathway?map04720/K04345%09%23FFFFFF,green/K02183%09%23FFFFFF,red/K19662%09%23FFFFFF,red/K05858%09%23FFFFFF,purple/K04365%09%23FFFFFF,red/K07836%09%23FFFFFF,red/K04348%09%23FFFFFF,red/K08014%09%23FFFFFF,green/K04634%09%23FFFFFF,red/K04960%09%23FFFFFF,green/K04353%09%23FFFFFF,red/K04515%09%23FFFFFF,purple/K04368%09%23FFFFFF,red/K06269%09%23FFFFFF,red/
mmu00592	alpha-Linolenic acid metabolism	Metabolism	Lipid metabolism	3	3	6	24	0.532892	0.773553	ENSMUSG00000033847(Pla2g4c),ENSMUSG00000060675(Plaat3),ENSMUSG00000056220(Pla2g4a)	ENSMUSG00000027999(Pla2g12a),ENSMUSG00000028751(Pla2g2e),ENSMUSG00000029098(Acox3)	http://www.kegg.jp/kegg-bin/show_pathway?map00592/K16342%09%23FFFFFF,red/K16817%09%23FFFFFF,red/K01047%09%23FFFFFF,green/K00232%09%23FFFFFF,green/
mmu03013	RNA transport	Genetic Information Processing	Translation	32	8	40	167	0.5366	0.775042	ENSMUSG00000030423(Pop4),ENSMUSG00000027680(Fxr1),ENSMUSG00000030447(Cyfip1),ENSMUSG00000022336(Eif3e),ENSMUSG00000051329(Nup160),ENSMUSG00000029715(Pop7),ENSMUSG00000035530(Eif1),ENSMUSG00000001440(Kpnb1),ENSMUSG00000021282(Eif5),ENSMUSG00000022283(Pabpc1),ENSMUSG00000003226(Ranbp2),ENSMUSG00000079614(Seh1l),ENSMUSG00000074656(Eif2s2),ENSMUSG00000067194(Eif1ax),ENSMUSG00000005610(Eif4g2),ENSMUSG…	ENSMUSG00000060121(Gemin2),ENSMUSG00000040034(Nup43),ENSMUSG00000020091(Eif4ebp2),ENSMUSG00000036678(Aaas),ENSMUSG00000016349(Eef1a2),ENSMUSG00000060152(Pop5),ENSMUSG00000040621(Gemin8),ENSMUSG00000030091(Nup210)	http://www.kegg.jp/kegg-bin/show_pathway?map03013/K18644%09%23FFFFFF,green/K03259%09%23FFFFFF,red/K14284%09%23FFFFFF,red/K03262%09%23FFFFFF,red/K14308%09%23FFFFFF,red/K14527%09%23FFFFFF,red/K03538%09%23FFFFFF,red/K07562%09%23FFFFFF,red/K13136%09%23FFFFFF,green/K14296%09%23FFFFFF,red/K14320%09%23FFFFFF,green/K14293%09%23FFFFFF,red/K14307%09%23FFFFFF,red/K03537%09%23FFFFFF,green/K03260%09%23FFFFFF,…
mmu04261	Adrenergic signaling in cardiomyocytes	Organismal Systems	Circulatory system	24	10	34	142	0.539526	0.775042	ENSMUSG00000078815(Cacng6),ENSMUSG00000026463(Atp2b4),ENSMUSG00000009630(Ppp2cb),ENSMUSG00000000001(Gnai3),ENSMUSG00000020349(Ppp2ca),ENSMUSG00000026414(Tnnt2),ENSMUSG00000053395(Cacng8),ENSMUSG00000046207(Pik3r6),ENSMUSG00000031799(Tpm4),ENSMUSG00000053007(Creb5),ENSMUSG00000020901(Pik3r5),ENSMUSG00000041769(Ppp2r2d),ENSMUSG00000053137(Mapk11),ENSMUSG00000014956(Ppp1cb),ENSMUSG00000026626(Ppp2r5…	ENSMUSG00000035458(Tnni3),ENSMUSG00000005469(Prkaca),ENSMUSG00000022469(Rapgef3),ENSMUSG00000031659(Adcy7),ENSMUSG00000045875(Adra1a),ENSMUSG00000005580(Adcy9),ENSMUSG00000038648(Creb3l2),ENSMUSG00000021820(Camk2g),ENSMUSG00000040061(Plcb2),ENSMUSG00000020654(Adcy3)	http://www.kegg.jp/kegg-bin/show_pathway?map04261/K04873%09%23FFFFFF,red/K06269%09%23FFFFFF,red/K09047%09%23FFFFFF,red/K04354%09%23FFFFFF,red/K05858%09%23FFFFFF,purple/K21290%09%23FFFFFF,red/K08049%09%23FFFFFF,green/K04630%09%23FFFFFF,red/K04864%09%23FFFFFF,red/K04515%09%23FFFFFF,purple/K04634%09%23FFFFFF,red/K09290%09%23FFFFFF,red/K08043%09%23FFFFFF,green/K04382%09%23FFFFFF,red/K04441%09%23FFFFF…
mmu00310	Lysine degradation	Metabolism	Amino acid metabolism	4	10	14	58	0.541299	0.775042	ENSMUSG00000054823(Nsd3),ENSMUSG00000071350(Setdb2),ENSMUSG00000049327(Kmt5a),ENSMUSG00000062480(Acat3)	ENSMUSG00000027984(Hadh),ENSMUSG00000003809(Gcdh),ENSMUSG00000059851(Kmt5c),ENSMUSG00000025465(Echs1),ENSMUSG00000026687(Aldh9a1),ENSMUSG00000019055(Plod1),ENSMUSG00000036893(Ehmt1),ENSMUSG00000022853(Ehhadh),ENSMUSG00000015697(Setdb1),ENSMUSG00000037111(Setd7)	http://www.kegg.jp/kegg-bin/show_pathway?map00310/K00022%09%23FFFFFF,green/K07514%09%23FFFFFF,green/K00473%09%23FFFFFF,green/K00149%09%23FFFFFF,green/K11421%09%23FFFFFF,green/K18494%09%23FFFFFF,red/K11429%09%23FFFFFF,green/K11431%09%23FFFFFF,green/K07511%09%23FFFFFF,green/K11425%09%23FFFFFF,red/K00252%09%23FFFFFF,green/K11428%09%23FFFFFF,red/K00626%09%23FFFFFF,red/K11420%09%23FFFFFF,green/
mmu00250	Alanine, aspartate and glutamate metabolism	Metabolism	Amino acid metabolism	2	7	9	37	0.545229	0.777136	ENSMUSG00000026103(Gls),ENSMUSG00000076441(Ass1)	ENSMUSG00000022546(Gpt),ENSMUSG00000011148(Adssl1),ENSMUSG00000028737(Aldh4a1),ENSMUSG00000026473(Glul),ENSMUSG00000048142(Nat8l),ENSMUSG00000025190(Got1),ENSMUSG00000020774(Aspa)	http://www.kegg.jp/kegg-bin/show_pathway?map00250/K14454%09%23FFFFFF,green/K00294%09%23FFFFFF,green/K01940%09%23FFFFFF,red/K01939%09%23FFFFFF,green/K01915%09%23FFFFFF,green/K01425%09%23FFFFFF,red/K01437%09%23FFFFFF,green/K00814%09%23FFFFFF,green/K18309%09%23FFFFFF,green/
mmu00603	Glycosphingolipid biosynthesis - globo and isoglobo series	Metabolism	Glycan biosynthesis and metabolism	2	2	4	16	0.558566	0.79256	ENSMUSG00000013846(St3gal1),ENSMUSG00000026829(Gbgt1)	ENSMUSG00000074892(B3galt5),ENSMUSG00000022453(Naga)	http://www.kegg.jp/kegg-bin/show_pathway?map00603/K00722%09%23FFFFFF,red/K00780%09%23FFFFFF,red/K01204%09%23FFFFFF,green/K03877%09%23FFFFFF,green/
mmu00780	Biotin metabolism	Metabolism	Metabolism of cofactors and vitamins	0	1	1	3	0.561144	0.792647	-	ENSMUSG00000040820(Hlcs)	http://www.kegg.jp/kegg-bin/show_pathway?map00780/K01942%09%23FFFFFF,green/
mmu04724	Glutamatergic synapse	Organismal Systems	Nervous system	13	13	26	110	0.573095	0.805915	ENSMUSG00000024960(Plcb3),ENSMUSG00000027669(Gnb4),ENSMUSG00000052889(Prkcb),ENSMUSG00000033847(Pla2g4c),ENSMUSG00000042249(Grk3),ENSMUSG00000007617(Homer1),ENSMUSG00000024639(Gnaq),ENSMUSG00000029064(Gnb1),ENSMUSG00000000001(Gnai3),ENSMUSG00000036402(Gng12),ENSMUSG00000056220(Pla2g4a),ENSMUSG00000026103(Gls),ENSMUSG00000022092(Ppp3cc)	ENSMUSG00000034656(Cacna1a),ENSMUSG00000038607(Gng10),ENSMUSG00000042644(Itpr3),ENSMUSG00000005580(Adcy9),ENSMUSG00000026473(Glul),ENSMUSG00000032192(Gnb5),ENSMUSG00000031659(Adcy7),ENSMUSG00000005469(Prkaca),ENSMUSG00000020654(Adcy3),ENSMUSG00000040061(Plcb2),ENSMUSG00000003378(Grik5),ENSMUSG00000048240(Gng7),ENSMUSG00000043004(Gng2)	http://www.kegg.jp/kegg-bin/show_pathway?map04724/K08047%09%23FFFFFF,green/K15010%09%23FFFFFF,red/K04960%09%23FFFFFF,green/K04536%09%23FFFFFF,red/K04348%09%23FFFFFF,red/K04344%09%23FFFFFF,green/K04634%09%23FFFFFF,red/K04539%09%23FFFFFF,green/K07826%09%23FFFFFF,green/K04543%09%23FFFFFF,green/K04545%09%23FFFFFF,green/K04347%09%23FFFFFF,red/K08049%09%23FFFFFF,green/K01425%09%23FFFFFF,red/K04538%09%2…
mmu04610	Complement and coagulation cascades	Organismal Systems	Immune system	18	3	21	89	0.57709	0.807926	ENSMUSG00000036905(C1qb),ENSMUSG00000038521(C1s1),ENSMUSG00000036887(C1qa),ENSMUSG00000021675(F2rl2),ENSMUSG00000024164(C3),ENSMUSG00000090231(Cfb),ENSMUSG00000030786(Itgam),ENSMUSG00000062345(Serpinb2),ENSMUSG00000026399(Cd55),ENSMUSG00000027611(Procr),ENSMUSG00000031444(F10),ENSMUSG00000028128(F3),ENSMUSG00000073418(C4b),ENSMUSG00000048376(F2r),ENSMUSG00000037411(Serpine1),ENSMUSG00000055172(C1…	ENSMUSG00000016493(Cd46),ENSMUSG00000001930(Vwf),ENSMUSG00000074743(Thbd)	http://www.kegg.jp/kegg-bin/show_pathway?map04610/K03985%09%23FFFFFF,red/K04006%09%23FFFFFF,red/K06461%09%23FFFFFF,red/K01330%09%23FFFFFF,red/K03901%09%23FFFFFF,red/K04235%09%23FFFFFF,red/K03990%09%23FFFFFF,red/K01335%09%23FFFFFF,red/K03987%09%23FFFFFF,red/K03907%09%23FFFFFF,green/K03982%09%23FFFFFF,red/K04010%09%23FFFFFF,red/K04007%09%23FFFFFF,green/K01314%09%23FFFFFF,red/K03914%09%23FFFFFF,red/…
mmu00531	Glycosaminoglycan degradation	Metabolism	Glycan biosynthesis and metabolism	0	5	5	21	0.59206	0.825217	-	ENSMUSG00000033540(Idua),ENSMUSG00000005043(Sgsh),ENSMUSG00000001751(Naglu),ENSMUSG00000010047(Hyal2),ENSMUSG00000010051(Hyal1)	http://www.kegg.jp/kegg-bin/show_pathway?map00531/K01197%09%23FFFFFF,green/K01205%09%23FFFFFF,green/K01565%09%23FFFFFF,green/K01217%09%23FFFFFF,green/
mmu04270	Vascular smooth muscle contraction	Organismal Systems	Circulatory system	20	12	32	137	0.60359	0.83758	ENSMUSG00000020178(Adora2a),ENSMUSG00000059588(Calcrl),ENSMUSG00000021367(Edn1),ENSMUSG00000056220(Pla2g4a),ENSMUSG00000014956(Ppp1cb),ENSMUSG00000001175(Calm1),ENSMUSG00000021948(Prkcd),ENSMUSG00000024960(Plcb3),ENSMUSG00000024290(Rock1),ENSMUSG00000052889(Prkcb),ENSMUSG00000033847(Pla2g4c),ENSMUSG00000030790(Adm),ENSMUSG00000002413(Braf),ENSMUSG00000004936(Map2k1),ENSMUSG00000024639(Gnaq),ENSMU…	ENSMUSG00000021108(Prkch),ENSMUSG00000040061(Plcb2),ENSMUSG00000027999(Pla2g12a),ENSMUSG00000027931(Npr1),ENSMUSG00000042644(Itpr3),ENSMUSG00000000149(Gna12),ENSMUSG00000020654(Adcy3),ENSMUSG00000045875(Adra1a),ENSMUSG00000028751(Pla2g2e),ENSMUSG00000005580(Adcy9),ENSMUSG00000005469(Prkaca),ENSMUSG00000031659(Adcy7)	http://www.kegg.jp/kegg-bin/show_pathway?map04270/K04634%09%23FFFFFF,red/K04639%09%23FFFFFF,red/K06068%09%23FFFFFF,red/K06269%09%23FFFFFF,red/K02183%09%23FFFFFF,red/K01047%09%23FFFFFF,green/K04135%09%23FFFFFF,green/K04365%09%23FFFFFF,red/K05858%09%23FFFFFF,purple/K16342%09%23FFFFFF,red/K16366%09%23FFFFFF,red/K12323%09%23FFFFFF,green/K06270%09%23FFFFFF,red/K04266%09%23FFFFFF,red/K04960%09%23FFFFFF…
mmu00910	Nitrogen metabolism	Metabolism	Energy metabolism	2	2	4	17	0.611027	0.844182	ENSMUSG00000027555(Car13),ENSMUSG00000027562(Car2)	ENSMUSG00000031883(Car7),ENSMUSG00000026473(Glul)	http://www.kegg.jp/kegg-bin/show_pathway?map00910/K01672%09%23FFFFFF,purple/K18245%09%23FFFFFF,red/K01915%09%23FFFFFF,green/
mmu00340	Histidine metabolism	Metabolism	Amino acid metabolism	1	5	6	26	0.619095	0.851593	ENSMUSG00000027360(Hdc)	ENSMUSG00000015890(Amdhd1),ENSMUSG00000026687(Aldh9a1),ENSMUSG00000026986(Hnmt),ENSMUSG00000020774(Aspa),ENSMUSG00000020017(Hal)	http://www.kegg.jp/kegg-bin/show_pathway?map00340/K01437%09%23FFFFFF,green/K00149%09%23FFFFFF,green/K01468%09%23FFFFFF,green/K01745%09%23FFFFFF,green/K00546%09%23FFFFFF,green/K01590%09%23FFFFFF,red/
mmu04977	Vitamin digestion and absorption	Organismal Systems	Digestive system	1	4	5	22	0.636956	0.872353	ENSMUSG00000023088(Abcc1)	ENSMUSG00000040918(Slc19a2),ENSMUSG00000001436(Slc19a1),ENSMUSG00000006641(Slc5a6),ENSMUSG00000037936(Scarb1)	http://www.kegg.jp/kegg-bin/show_pathway?map04977/K14610%09%23FFFFFF,green/K05665%09%23FFFFFF,red/K14609%09%23FFFFFF,green/K13885%09%23FFFFFF,green/K14386%09%23FFFFFF,green/
mmu00380	Tryptophan metabolism	Metabolism	Amino acid metabolism	4	7	11	49	0.654702	0.890839	ENSMUSG00000063558(Aox1),ENSMUSG00000031549(Ido2),ENSMUSG00000062480(Acat3),ENSMUSG00000093806(Asmt)	ENSMUSG00000022853(Ehhadh),ENSMUSG00000000673(Haao),ENSMUSG00000025465(Echs1),ENSMUSG00000026687(Aldh9a1),ENSMUSG00000027984(Hadh),ENSMUSG00000003809(Gcdh),ENSMUSG00000039648(Kyat1)	http://www.kegg.jp/kegg-bin/show_pathway?map00380/K00816%09%23FFFFFF,green/K00626%09%23FFFFFF,red/K00543%09%23FFFFFF,red/K00463%09%23FFFFFF,red/K00252%09%23FFFFFF,green/K00149%09%23FFFFFF,green/K07514%09%23FFFFFF,green/K00022%09%23FFFFFF,green/K00452%09%23FFFFFF,green/K00157%09%23FFFFFF,red/K07511%09%23FFFFFF,green/
mmu04713	Circadian entrainment	Organismal Systems	Environmental adaptation	9	13	22	97	0.658525	0.890839	ENSMUSG00000000001(Gnai3),ENSMUSG00000029064(Gnb1),ENSMUSG00000027669(Gnb4),ENSMUSG00000053819(Camk2d),ENSMUSG00000036402(Gng12),ENSMUSG00000024639(Gnaq),ENSMUSG00000001175(Calm1),ENSMUSG00000024960(Plcb3),ENSMUSG00000052889(Prkcb)	ENSMUSG00000048240(Gng7),ENSMUSG00000032192(Gnb5),ENSMUSG00000031659(Adcy7),ENSMUSG00000005469(Prkaca),ENSMUSG00000028957(Per3),ENSMUSG00000038607(Gng10),ENSMUSG00000005580(Adcy9),ENSMUSG00000043004(Gng2),ENSMUSG00000040061(Plcb2),ENSMUSG00000021820(Camk2g),ENSMUSG00000020654(Adcy3),ENSMUSG00000021250(Fos),ENSMUSG00000042644(Itpr3)	http://www.kegg.jp/kegg-bin/show_pathway?map04713/K04538%09%23FFFFFF,red/K21945%09%23FFFFFF,green/K07826%09%23FFFFFF,green/K04630%09%23FFFFFF,red/K04543%09%23FFFFFF,green/K04515%09%23FFFFFF,purple/K04379%09%23FFFFFF,green/K05858%09%23FFFFFF,purple/K04539%09%23FFFFFF,green/K04545%09%23FFFFFF,green/K19662%09%23FFFFFF,red/K08049%09%23FFFFFF,green/K04634%09%23FFFFFF,red/K04347%09%23FFFFFF,red/K04960%…
mmu04913	Ovarian steroidogenesis	Organismal Systems	Endocrine system	5	8	13	58	0.661255	0.890839	ENSMUSG00000026675(Hsd17b7),ENSMUSG00000056220(Pla2g4a),ENSMUSG00000032487(Ptgs2),ENSMUSG00000032193(Ldlr),ENSMUSG00000033847(Pla2g4c)	ENSMUSG00000037936(Scarb1),ENSMUSG00000019301(Hsd17b1),ENSMUSG00000031659(Adcy7),ENSMUSG00000005469(Prkaca),ENSMUSG00000005580(Adcy9),ENSMUSG00000015224(Cyp2j9),ENSMUSG00000005534(Insr),ENSMUSG00000020654(Adcy3)	http://www.kegg.jp/kegg-bin/show_pathway?map04913/K00044%09%23FFFFFF,green/K13373%09%23FFFFFF,red/K04527%09%23FFFFFF,green/K04345%09%23FFFFFF,green/K08049%09%23FFFFFF,green/K07418%09%23FFFFFF,green/K08047%09%23FFFFFF,green/K08043%09%23FFFFFF,green/K11987%09%23FFFFFF,red/K12473%09%23FFFFFF,red/K13885%09%23FFFFFF,green/K16342%09%23FFFFFF,red/
mmu00051	Fructose and mannose metabolism	Metabolism	Carbohydrate metabolism	4	4	8	36	0.661766	0.890839	ENSMUSG00000021196(Pfkp),ENSMUSG00000070284(Gmppb),ENSMUSG00000020277(Pfkl),ENSMUSG00000000628(Hk2)	ENSMUSG00000027227(Sord),ENSMUSG00000022474(Pmm1),ENSMUSG00000026409(Pfkfb2),ENSMUSG00000033703(Fcsk)	http://www.kegg.jp/kegg-bin/show_pathway?map00051/K00844%09%23FFFFFF,red/K05305%09%23FFFFFF,green/K00966%09%23FFFFFF,red/K00008%09%23FFFFFF,green/K00850%09%23FFFFFF,red/K19029%09%23FFFFFF,green/K17497%09%23FFFFFF,green/
mmu00471	D-Glutamine and D-glutamate metabolism	Metabolism	Metabolism of other amino acids	1	0	1	4	0.666513	0.893411	ENSMUSG00000026103(Gls)	-	http://www.kegg.jp/kegg-bin/show_pathway?map00471/K01425%09%23FFFFFF,red/
mmu00900	Terpenoid backbone biosynthesis	Metabolism	Metabolism of terpenoids and polyketides	5	0	5	23	0.678655	0.905832	ENSMUSG00000021670(Hmgcr),ENSMUSG00000062480(Acat3),ENSMUSG00000026784(Pdss1),ENSMUSG00000093930(Hmgcs1),ENSMUSG00000058258(Idi1)	-	http://www.kegg.jp/kegg-bin/show_pathway?map00900/K00021%09%23FFFFFF,red/K01823%09%23FFFFFF,red/K01641%09%23FFFFFF,red/K00626%09%23FFFFFF,red/K12504%09%23FFFFFF,red/
mmu04020	Calcium signaling pathway	Environmental Information Processing	Signal transduction	22	20	42	185	0.688883	0.915604	ENSMUSG00000020178(Adora2a),ENSMUSG00000029084(Cd38),ENSMUSG00000053819(Camk2d),ENSMUSG00000048376(F2r),ENSMUSG00000039747(Orai2),ENSMUSG00000024620(Pdgfrb),ENSMUSG00000022092(Ppp3cc),ENSMUSG00000026463(Atp2b4),ENSMUSG00000022122(Ednrb),ENSMUSG00000020826(Nos2),ENSMUSG00000001175(Calm1),ENSMUSG00000024960(Plcb3),ENSMUSG00000052889(Prkcb),ENSMUSG00000008892(Vdac3),ENSMUSG00000033470(Cysltr2),ENSMU…	ENSMUSG00000040061(Plcb2),ENSMUSG00000021820(Camk2g),ENSMUSG00000053004(Hrh1),ENSMUSG00000054640(Slc8a1),ENSMUSG00000016933(Plcg1),ENSMUSG00000034055(Phka1),ENSMUSG00000031295(Phka2),ENSMUSG00000034656(Cacna1a),ENSMUSG00000045875(Adra1a),ENSMUSG00000045382(Cxcr4),ENSMUSG00000043964(Orai3),ENSMUSG00000042644(Itpr3),ENSMUSG00000005580(Adcy9),ENSMUSG00000004347(Pde1c),ENSMUSG00000031659(Adcy7),ENSMU…	http://www.kegg.jp/kegg-bin/show_pathway?map04020/K16057%09%23FFFFFF,red/K04348%09%23FFFFFF,red/K16058%09%23FFFFFF,green/K04266%09%23FFFFFF,red/K04515%09%23FFFFFF,purple/K04149%09%23FFFFFF,green/K19662%09%23FFFFFF,red/K04634%09%23FFFFFF,red/K05849%09%23FFFFFF,green/K04267%09%23FFFFFF,red/K02183%09%23FFFFFF,red/K04361%09%23FFFFFF,red/K13755%09%23FFFFFF,green/K03914%09%23FFFFFF,red/K04345%09%23FFFF…
mmu00512	Mucin type O-glycan biosynthesis	Metabolism	Glycan biosynthesis and metabolism	4	2	6	28	0.695456	0.920456	ENSMUSG00000013846(St3gal1),ENSMUSG00000026994(Galnt3),ENSMUSG00000031608(Galnt7),ENSMUSG00000017929(B4galt5)	ENSMUSG00000038843(Gcnt1),ENSMUSG00000039774(Galnt12)	http://www.kegg.jp/kegg-bin/show_pathway?map00512/K00710%09%23FFFFFF,purple/K00727%09%23FFFFFF,green/K09905%09%23FFFFFF,red/K00780%09%23FFFFFF,red/
mmu04971	Gastric acid secretion	Organismal Systems	Digestive system	8	8	16	73	0.705005	0.924768	ENSMUSG00000024639(Gnaq),ENSMUSG00000052889(Prkcb),ENSMUSG00000027562(Car2),ENSMUSG00000001175(Calm1),ENSMUSG00000024960(Plcb3),ENSMUSG00000053819(Camk2d),ENSMUSG00000052397(Ezr),ENSMUSG00000000001(Gnai3)	ENSMUSG00000020654(Adcy3),ENSMUSG00000042644(Itpr3),ENSMUSG00000040061(Plcb2),ENSMUSG00000044708(Kcnj10),ENSMUSG00000021820(Camk2g),ENSMUSG00000031659(Adcy7),ENSMUSG00000005469(Prkaca),ENSMUSG00000005580(Adcy9)	http://www.kegg.jp/kegg-bin/show_pathway?map04971/K02183%09%23FFFFFF,red/K04515%09%23FFFFFF,purple/K04630%09%23FFFFFF,red/K08043%09%23FFFFFF,green/K04960%09%23FFFFFF,green/K05003%09%23FFFFFF,green/K08047%09%23FFFFFF,green/K08049%09%23FFFFFF,green/K18245%09%23FFFFFF,red/K04345%09%23FFFFFF,green/K08007%09%23FFFFFF,red/K19662%09%23FFFFFF,red/K04634%09%23FFFFFF,red/K05858%09%23FFFFFF,purple/
mmu03018	RNA degradation	Genetic Information Processing	Folding, sorting and degradation	12	6	18	82	0.709014	0.924768	ENSMUSG00000032410(Xrn1),ENSMUSG00000024472(Dcp2),ENSMUSG00000031601(Cnot7),ENSMUSG00000020277(Pfkl),ENSMUSG00000022283(Pabpc1),ENSMUSG00000021962(Dcp1a),ENSMUSG00000027433(Xrn2),ENSMUSG00000021196(Pfkp),ENSMUSG00000020423(Btg2),ENSMUSG00000036478(Btg1),ENSMUSG00000034575(Tent4a),ENSMUSG00000020464(Pnpt1)	ENSMUSG00000032565(Nudt16),ENSMUSG00000061286(Exosc5),ENSMUSG00000022685(Parn),ENSMUSG00000060600(Eno3),ENSMUSG00000034724(Cnot6l),ENSMUSG00000025785(Exosc7)	http://www.kegg.jp/kegg-bin/show_pathway?map03018/K12618%09%23FFFFFF,red/K12619%09%23FFFFFF,red/K12590%09%23FFFFFF,green/K00962%09%23FFFFFF,red/K12603%09%23FFFFFF,green/K01689%09%23FFFFFF,green/K12589%09%23FFFFFF,green/K12581%09%23FFFFFF,red/K01148%09%23FFFFFF,green/K00850%09%23FFFFFF,red/K12613%09%23FFFFFF,red/K14443%09%23FFFFFF,red/K12610%09%23FFFFFF,red/K03514%09%23FFFFFF,red/K16855%09%23FFFFF…
mmu00500	Starch and sucrose metabolism	Metabolism	Carbohydrate metabolism	2	5	7	33	0.710456	0.924768	ENSMUSG00000022707(Gbe1),ENSMUSG00000000628(Hk2)	ENSMUSG00000033400(Agl),ENSMUSG00000019528(Gyg),ENSMUSG00000033059(Pygb),ENSMUSG00000037370(Enpp1),ENSMUSG00000062646(Ganc)	http://www.kegg.jp/kegg-bin/show_pathway?map00500/K01196%09%23FFFFFF,green/K00750%09%23FFFFFF,green/K01513%09%23FFFFFF,green/K00688%09%23FFFFFF,green/K00700%09%23FFFFFF,red/K12317%09%23FFFFFF,green/K00844%09%23FFFFFF,red/
mmu00030	Pentose phosphate pathway	Metabolism	Carbohydrate metabolism	5	2	7	33	0.710456	0.924768	ENSMUSG00000020277(Pfkl),ENSMUSG00000026005(Rpe),ENSMUSG00000050002(Idnk),ENSMUSG00000021196(Pfkp),ENSMUSG00000028961(Pgd)	ENSMUSG00000028980(H6pd),ENSMUSG00000025742(Prps2)	http://www.kegg.jp/kegg-bin/show_pathway?map00030/K00850%09%23FFFFFF,red/K01783%09%23FFFFFF,red/K13937%09%23FFFFFF,green/K00033%09%23FFFFFF,red/K00948%09%23FFFFFF,green/K00851%09%23FFFFFF,red/
mmu04960	Aldosterone-regulated sodium reabsorption	Organismal Systems	Excretory system	4	4	8	38	0.724043	0.938575	ENSMUSG00000039936(Pik3cd),ENSMUSG00000041417(Pik3r1),ENSMUSG00000028698(Pik3r3),ENSMUSG00000052889(Prkcb)	ENSMUSG00000055980(Irs1),ENSMUSG00000030340(Scnn1a),ENSMUSG00000031834(Pik3r2),ENSMUSG00000005534(Insr)	http://www.kegg.jp/kegg-bin/show_pathway?map04960/K04527%09%23FFFFFF,green/K19662%09%23FFFFFF,red/K00922%09%23FFFFFF,red/K02649%09%23FFFFFF,purple/K16172%09%23FFFFFF,green/K04824%09%23FFFFFF,green/
mmu05322	Systemic lupus erythematosus	Human Diseases	Immune diseases	25	6	31	140	0.728034	0.93988	ENSMUSG00000015947(Fcgr1),ENSMUSG00000037894(H2az1),ENSMUSG00000016529(Il10),ENSMUSG00000075122(Cd80),ENSMUSG00000030966(Trim21),ENSMUSG00000073418(C4b),ENSMUSG00000024334(H2-Oa),ENSMUSG00000024401(Tnf),ENSMUSG00000017652(Cd40),ENSMUSG00000041538(H2-Ob),ENSMUSG00000037649(H2-DMa),ENSMUSG00000059089(Fcgr4),ENSMUSG00000016559(H3f3b),ENSMUSG00000060743(H3f3a),ENSMUSG00000055172(C1ra),ENSMUSG00000073…	ENSMUSG00000026012(Cd28),ENSMUSG00000018199(Ro60),ENSMUSG00000069272(H2ac8),ENSMUSG00000020086(Macroh2a2),ENSMUSG00000041126(H2az2),ENSMUSG00000068854(H2bc21)	http://www.kegg.jp/kegg-bin/show_pathway?map05322/K03156%09%23FFFFFF,red/K06463%09%23FFFFFF,red/K03987%09%23FFFFFF,red/K06470%09%23FFFFFF,green/K11087%09%23FFFFFF,red/K03160%09%23FFFFFF,red/K11251%09%23FFFFFF,purple/K05443%09%23FFFFFF,red/K01330%09%23FFFFFF,red/K05412%09%23FFFFFF,red/K01331%09%23FFFFFF,red/K11253%09%23FFFFFF,red/K06752%09%23FFFFFF,red/K10651%09%23FFFFFF,red/K11252%09%23FFFFFF,gre…
mmu00604	Glycosphingolipid biosynthesis - ganglio series	Metabolism	Glycan biosynthesis and metabolism	1	2	3	15	0.736087	0.946398	ENSMUSG00000013846(St3gal1)	ENSMUSG00000067370(B3galt4),ENSMUSG00000056091(St3gal5)	http://www.kegg.jp/kegg-bin/show_pathway?map00604/K00715%09%23FFFFFF,green/K03370%09%23FFFFFF,green/K00780%09%23FFFFFF,red/
mmu00524	Neomycin, kanamycin and gentamicin biosynthesis	Metabolism	Biosynthesis of other secondary metabolites	1	0	1	5	0.746588	0.955997	ENSMUSG00000000628(Hk2)	-	http://www.kegg.jp/kegg-bin/show_pathway?map00524/K00844%09%23FFFFFF,red/
mmu00563	Glycosylphosphatidylinositol (GPI)-anchor biosynthesis	Metabolism	Glycan biosynthesis and metabolism	1	4	5	25	0.751992	0.959019	ENSMUSG00000043257(Pigv)	ENSMUSG00000028454(Pigo),ENSMUSG00000021120(Pigh),ENSMUSG00000010607(Pigyl),ENSMUSG00000079469(Pigb)	http://www.kegg.jp/kegg-bin/show_pathway?map00563/K07542%09%23FFFFFF,red/K05286%09%23FFFFFF,green/K05288%09%23FFFFFF,green/K03858%09%23FFFFFF,green/K11001%09%23FFFFFF,green/
mmu04927	Cortisol synthesis and secretion	Organismal Systems	Endocrine system	5	10	15	71	0.75677	0.96122	ENSMUSG00000023034(Nr4a1),ENSMUSG00000032193(Ldlr),ENSMUSG00000024639(Gnaq),ENSMUSG00000024960(Plcb3),ENSMUSG00000053007(Creb5)	ENSMUSG00000027698(Nceh1),ENSMUSG00000038648(Creb3l2),ENSMUSG00000039956(Mrap),ENSMUSG00000040061(Plcb2),ENSMUSG00000020654(Adcy3),ENSMUSG00000042644(Itpr3),ENSMUSG00000037936(Scarb1),ENSMUSG00000005469(Prkaca),ENSMUSG00000031659(Adcy7),ENSMUSG00000005580(Adcy9)	http://www.kegg.jp/kegg-bin/show_pathway?map04927/K09047%09%23FFFFFF,red/K05858%09%23FFFFFF,purple/K04960%09%23FFFFFF,green/K04634%09%23FFFFFF,red/K13885%09%23FFFFFF,green/K04465%09%23FFFFFF,red/K12473%09%23FFFFFF,red/K22398%09%23FFFFFF,green/K08049%09%23FFFFFF,green/K08043%09%23FFFFFF,green/K08047%09%23FFFFFF,green/K14349%09%23FFFFFF,green/K04345%09%23FFFFFF,green/K09048%09%23FFFFFF,green/
mmu04727	GABAergic synapse	Organismal Systems	Nervous system	8	10	18	85	0.767105	0.970434	ENSMUSG00000047454(Gphn),ENSMUSG00000052889(Prkcb),ENSMUSG00000026103(Gls),ENSMUSG00000036402(Gng12),ENSMUSG00000027646(Src),ENSMUSG00000029064(Gnb1),ENSMUSG00000027669(Gnb4),ENSMUSG00000000001(Gnai3)	ENSMUSG00000026473(Glul),ENSMUSG00000020654(Adcy3),ENSMUSG00000034656(Cacna1a),ENSMUSG00000043004(Gng2),ENSMUSG00000005469(Prkaca),ENSMUSG00000031659(Adcy7),ENSMUSG00000032192(Gnb5),ENSMUSG00000038607(Gng10),ENSMUSG00000005580(Adcy9),ENSMUSG00000048240(Gng7)	http://www.kegg.jp/kegg-bin/show_pathway?map04727/K08043%09%23FFFFFF,green/K08049%09%23FFFFFF,green/K04630%09%23FFFFFF,red/K05704%09%23FFFFFF,red/K04543%09%23FFFFFF,green/K04538%09%23FFFFFF,red/K19662%09%23FFFFFF,red/K04545%09%23FFFFFF,green/K01425%09%23FFFFFF,red/K04344%09%23FFFFFF,green/K04539%09%23FFFFFF,green/K04536%09%23FFFFFF,red/K04347%09%23FFFFFF,red/K04345%09%23FFFFFF,green/K01915%09%23F…
mmu04922	Glucagon signaling pathway	Organismal Systems	Endocrine system	7	14	21	99	0.777073	0.979112	ENSMUSG00000053819(Camk2d),ENSMUSG00000024639(Gnaq),ENSMUSG00000028645(Slc2a1),ENSMUSG00000024960(Plcb3),ENSMUSG00000001175(Calm1),ENSMUSG00000022092(Ppp3cc),ENSMUSG00000053007(Creb5)	ENSMUSG00000034055(Phka1),ENSMUSG00000044167(Foxo1),ENSMUSG00000021820(Camk2g),ENSMUSG00000040061(Plcb2),ENSMUSG00000038648(Creb3l2),ENSMUSG00000042010(Acacb),ENSMUSG00000042644(Itpr3),ENSMUSG00000033059(Pygb),ENSMUSG00000024042(Sik1),ENSMUSG00000031295(Phka2),ENSMUSG00000040618(Pck2),ENSMUSG00000028944(Prkag2),ENSMUSG00000030671(Pde3b),ENSMUSG00000005469(Prkaca)	http://www.kegg.jp/kegg-bin/show_pathway?map04922/K04634%09%23FFFFFF,red/K01946%09%23FFFFFF,green/K05858%09%23FFFFFF,purple/K07201%09%23FFFFFF,green/K07200%09%23FFFFFF,green/K04960%09%23FFFFFF,green/K07299%09%23FFFFFF,red/K09047%09%23FFFFFF,red/K13296%09%23FFFFFF,green/K09048%09%23FFFFFF,green/K07190%09%23FFFFFF,green/K04345%09%23FFFFFF,green/K19008%09%23FFFFFF,green/K00688%09%23FFFFFF,green/K045…
mmu04932	Non-alcoholic fatty liver disease (NAFLD)	Human Diseases	Endocrine and metabolic diseases	20	11	31	144	0.785566	0.98587	ENSMUSG00000021936(Mapk8),ENSMUSG00000028163(Nfkb1),ENSMUSG00000071369(Map3k5),ENSMUSG00000028698(Pik3r3),ENSMUSG00000021116(Eif2s1),ENSMUSG00000030341(Tnfrsf1a),ENSMUSG00000024401(Tnf),ENSMUSG00000026029(Casp8),ENSMUSG00000027399(Il1a),ENSMUSG00000025076(Casp7),ENSMUSG00000053113(Socs3),ENSMUSG00000026942(Traf2),ENSMUSG00000063694(Cycs),ENSMUSG00000039936(Pik3cd),ENSMUSG00000004446(Bid),ENSMUSG0…	ENSMUSG00000052684(Jun),ENSMUSG00000038894(Irs2),ENSMUSG00000031834(Pik3r2),ENSMUSG00000015846(Rxra),ENSMUSG00000005534(Insr),ENSMUSG00000028944(Prkag2),ENSMUSG00000034957(Cebpa),ENSMUSG00000055980(Irs1),ENSMUSG00000024038(Ndufv3),ENSMUSG00000027947(Il6ra),ENSMUSG00000031668(Eif2ak3)	http://www.kegg.jp/kegg-bin/show_pathway?map04932/K04390%09%23FFFFFF,red/K02649%09%23FFFFFF,purple/K03944%09%23FFFFFF,green/K04398%09%23FFFFFF,red/K04448%09%23FFFFFF,green/K02580%09%23FFFFFF,red/K04426%09%23FFFFFF,red/K03156%09%23FFFFFF,red/K08860%09%23FFFFFF,green/K04440%09%23FFFFFF,red/K08738%09%23FFFFFF,red/K03237%09%23FFFFFF,red/K04726%09%23FFFFFF,red/K05055%09%23FFFFFF,green/K16172%09%23FFFF…
mmu00410	beta-Alanine metabolism	Metabolism	Metabolism of other amino acids	0	6	6	31	0.789386	0.986733	-	ENSMUSG00000041426(Hibch),ENSMUSG00000022853(Ehhadh),ENSMUSG00000026687(Aldh9a1),ENSMUSG00000025465(Echs1),ENSMUSG00000062908(Acadm),ENSMUSG00000074064(Mlycd)	http://www.kegg.jp/kegg-bin/show_pathway?map00410/K00149%09%23FFFFFF,green/K07511%09%23FFFFFF,green/K00249%09%23FFFFFF,green/K05605%09%23FFFFFF,green/K01578%09%23FFFFFF,green/K07514%09%23FFFFFF,green/
mmu04916	Melanogenesis	Organismal Systems	Endocrine system	13	8	21	100	0.792964	0.987287	ENSMUSG00000024639(Gnaq),ENSMUSG00000004936(Map2k1),ENSMUSG00000052889(Prkcb),ENSMUSG00000024960(Plcb3),ENSMUSG00000022122(Ednrb),ENSMUSG00000001175(Calm1),ENSMUSG00000053819(Camk2d),ENSMUSG00000044674(Fzd1),ENSMUSG00000021367(Edn1),ENSMUSG00000033227(Wnt6),ENSMUSG00000045005(Fzd5),ENSMUSG00000035158(Mitf),ENSMUSG00000000001(Gnai3)	ENSMUSG00000020654(Adcy3),ENSMUSG00000020888(Dvl2),ENSMUSG00000040061(Plcb2),ENSMUSG00000021820(Camk2g),ENSMUSG00000038648(Creb3l2),ENSMUSG00000031659(Adcy7),ENSMUSG00000005469(Prkaca),ENSMUSG00000005580(Adcy9)	http://www.kegg.jp/kegg-bin/show_pathway?map04916/K02183%09%23FFFFFF,red/K16366%09%23FFFFFF,red/K04630%09%23FFFFFF,red/K09048%09%23FFFFFF,green/K04198%09%23FFFFFF,red/K09455%09%23FFFFFF,red/K04345%09%23FFFFFF,green/K02375%09%23FFFFFF,red/K08043%09%23FFFFFF,green/K04515%09%23FFFFFF,purple/K04634%09%23FFFFFF,red/K02353%09%23FFFFFF,green/K08047%09%23FFFFFF,green/K02432%09%23FFFFFF,red/K08049%09%23FF…
mmu04964	Proximal tubule bicarbonate reclamation	Organismal Systems	Excretory system	3	1	4	22	0.810604	1	ENSMUSG00000026103(Gls),ENSMUSG00000027562(Car2),ENSMUSG00000025792(Slc25a10)	ENSMUSG00000040618(Pck2)	http://www.kegg.jp/kegg-bin/show_pathway?map04964/K13577%09%23FFFFFF,red/K18245%09%23FFFFFF,red/K01425%09%23FFFFFF,red/K01596%09%23FFFFFF,green/
mmu04130	SNARE interactions in vesicular transport	Genetic Information Processing	Folding, sorting and degradation	3	3	6	32	0.815244	1	ENSMUSG00000026470(Stx6),ENSMUSG00000010392(Gosr1),ENSMUSG00000039232(Stx11)	ENSMUSG00000061455(Stx17),ENSMUSG00000030337(Vamp1),ENSMUSG00000032757(Bet1)	http://www.kegg.jp/kegg-bin/show_pathway?map04130/K08510%09%23FFFFFF,green/K08498%09%23FFFFFF,red/K08491%09%23FFFFFF,green/K08495%09%23FFFFFF,red/K08504%09%23FFFFFF,green/K08487%09%23FFFFFF,red/
mmu00052	Galactose metabolism	Metabolism	Carbohydrate metabolism	3	3	6	32	0.815244	1	ENSMUSG00000021196(Pfkp),ENSMUSG00000000628(Hk2),ENSMUSG00000020277(Pfkl)	ENSMUSG00000028413(B4galt1),ENSMUSG00000020766(Galk1),ENSMUSG00000062646(Ganc)	http://www.kegg.jp/kegg-bin/show_pathway?map00052/K00850%09%23FFFFFF,red/K07966%09%23FFFFFF,green/K12317%09%23FFFFFF,green/K00849%09%23FFFFFF,green/K00844%09%23FFFFFF,red/
mmu00480	Glutathione metabolism	Metabolism	Metabolism of other amino acids	6	7	13	66	0.8326	1	ENSMUSG00000027610(Gss),ENSMUSG00000028961(Pgd),ENSMUSG00000001663(Gstt1),ENSMUSG00000031584(Gsr),ENSMUSG00000020309(Chac2),ENSMUSG00000002797(Ggct)	ENSMUSG00000004032(Gstm5),ENSMUSG00000029919(Hpgds),ENSMUSG00000022562(Oplah),ENSMUSG00000033318(Gstt2),ENSMUSG00000001665(Gstt3),ENSMUSG00000006344(Ggt5),ENSMUSG00000030978(Rrm1)	http://www.kegg.jp/kegg-bin/show_pathway?map00480/K00383%09%23FFFFFF,red/K07232%09%23FFFFFF,red/K00799%09%23FFFFFF,purple/K00682%09%23FFFFFF,red/K10807%09%23FFFFFF,green/K18592%09%23FFFFFF,green/K04097%09%23FFFFFF,green/K01469%09%23FFFFFF,green/K21456%09%23FFFFFF,red/K00033%09%23FFFFFF,red/
mmu03040	Spliceosome	Genetic Information Processing	Transcription	24	3	27	130	0.83395	1	ENSMUSG00000010608(Rbm25),ENSMUSG00000091971(Hspa1a),ENSMUSG00000029817(Tra2a),ENSMUSG00000061136(Prpf40a),ENSMUSG00000037070(Rbmxl1),ENSMUSG00000071172(Srsf3),ENSMUSG00000021039(Snw1),ENSMUSG00000033732(Sf3b3),ENSMUSG00000024498(Tcerg1),ENSMUSG00000022858(Tra2b),ENSMUSG00000028911(Srsf4),ENSMUSG00000002477(Snrpd1),ENSMUSG00000046434(Hnrnpa1),ENSMUSG00000038722(Bud31),ENSMUSG00000025024(Smndc1),E…	ENSMUSG00000032239(Rp9),ENSMUSG00000059970(Hspa2),ENSMUSG00000005687(Bcas2)	http://www.kegg.jp/kegg-bin/show_pathway?map03040/K12839%09%23FFFFFF,red/K12821%09%23FFFFFF,red/K06063%09%23FFFFFF,red/K19604%09%23FFFFFF,green/K03283%09%23FFFFFF,purple/K12830%09%23FFFFFF,red/K12836%09%23FFFFFF,red/K12897%09%23FFFFFF,red/K12893%09%23FFFFFF,red/K12845%09%23FFFFFF,red/K12873%09%23FFFFFF,red/K12886%09%23FFFFFF,red/K12877%09%23FFFFFF,red/K12822%09%23FFFFFF,red/K12820%09%23FFFFFF,red…
mmu04911	Insulin secretion	Organismal Systems	Endocrine system	7	10	17	85	0.840037	1	ENSMUSG00000024960(Plcb3),ENSMUSG00000028645(Slc2a1),ENSMUSG00000052889(Prkcb),ENSMUSG00000038260(Trpm4),ENSMUSG00000053007(Creb5),ENSMUSG00000024639(Gnaq),ENSMUSG00000053819(Camk2d)	ENSMUSG00000042644(Itpr3),ENSMUSG00000005580(Adcy9),ENSMUSG00000031659(Adcy7),ENSMUSG00000005469(Prkaca),ENSMUSG00000031840(Rab3a),ENSMUSG00000020654(Adcy3),ENSMUSG00000038648(Creb3l2),ENSMUSG00000002908(Kcnn1),ENSMUSG00000040061(Plcb2),ENSMUSG00000021820(Camk2g)	http://www.kegg.jp/kegg-bin/show_pathway?map04911/K04960%09%23FFFFFF,green/K04634%09%23FFFFFF,red/K19662%09%23FFFFFF,red/K07299%09%23FFFFFF,red/K08047%09%23FFFFFF,green/K04345%09%23FFFFFF,green/K04515%09%23FFFFFF,purple/K09048%09%23FFFFFF,green/K09047%09%23FFFFFF,red/K08043%09%23FFFFFF,green/K08049%09%23FFFFFF,green/K07882%09%23FFFFFF,green/K05858%09%23FFFFFF,purple/K04942%09%23FFFFFF,green/K0497…
mmu00120	Primary bile acid biosynthesis	Metabolism	Lipid metabolism	1	2	3	18	0.84327	1	ENSMUSG00000050370(Ch25h)	ENSMUSG00000026170(Cyp27a1),ENSMUSG00000022244(Amacr)	http://www.kegg.jp/kegg-bin/show_pathway?map00120/K01796%09%23FFFFFF,green/K00488%09%23FFFFFF,green/K10223%09%23FFFFFF,red/
mmu00561	Glycerolipid metabolism	Metabolism	Lipid metabolism	5	7	12	62	0.843591	1	ENSMUSG00000053846(Lipg),ENSMUSG00000021759(Plpp1),ENSMUSG00000034731(Dgkh),ENSMUSG00000023827(Agpat4),ENSMUSG00000025059(Gk)	ENSMUSG00000024978(Gpam),ENSMUSG00000020593(Lpin1),ENSMUSG00000040479(Dgkz),ENSMUSG00000026687(Aldh9a1),ENSMUSG00000038732(Mboat1),ENSMUSG00000025509(Pnpla2),ENSMUSG00000022861(Dgkg)	http://www.kegg.jp/kegg-bin/show_pathway?map00561/K00629%09%23FFFFFF,green/K00149%09%23FFFFFF,green/K13517%09%23FFFFFF,green/K00901%09%23FFFFFF,purple/K22284%09%23FFFFFF,red/K13523%09%23FFFFFF,red/K16816%09%23FFFFFF,green/K00864%09%23FFFFFF,red/K01080%09%23FFFFFF,red/K15728%09%23FFFFFF,green/
mmu03022	Basal transcription factors	Genetic Information Processing	Transcription	5	3	8	43	0.843964	1	ENSMUSG00000020680(Taf15),ENSMUSG00000051316(Taf7),ENSMUSG00000002658(Gtf2f1),ENSMUSG00000028271(Gtf2b),ENSMUSG00000067995(Gtf2f2)	ENSMUSG00000060261(Gtf2i),ENSMUSG00000023079(Gtf2ird1),ENSMUSG00000021639(Gtf2h2)	http://www.kegg.jp/kegg-bin/show_pathway?map03022/K03139%09%23FFFFFF,red/K03142%09%23FFFFFF,green/K03132%09%23FFFFFF,red/K03124%09%23FFFFFF,red/K03121%09%23FFFFFF,green/K03138%09%23FFFFFF,red/K14651%09%23FFFFFF,red/
mmu04726	Serotonergic synapse	Organismal Systems	Nervous system	15	12	27	131	0.845488	1	ENSMUSG00000000001(Gnai3),ENSMUSG00000022892(App),ENSMUSG00000027669(Gnb4),ENSMUSG00000029064(Gnb1),ENSMUSG00000036402(Gng12),ENSMUSG00000020838(Slc6a4),ENSMUSG00000032487(Ptgs2),ENSMUSG00000056220(Pla2g4a),ENSMUSG00000002413(Braf),ENSMUSG00000033847(Pla2g4c),ENSMUSG00000052889(Prkcb),ENSMUSG00000024960(Plcb3),ENSMUSG00000034997(Htr2a),ENSMUSG00000024639(Gnaq),ENSMUSG00000004936(Map2k1)	ENSMUSG00000047250(Ptgs1),ENSMUSG00000048240(Gng7),ENSMUSG00000038607(Gng10),ENSMUSG00000022469(Rapgef3),ENSMUSG00000005469(Prkaca),ENSMUSG00000032192(Gnb5),ENSMUSG00000040061(Plcb2),ENSMUSG00000043004(Gng2),ENSMUSG00000015224(Cyp2j9),ENSMUSG00000042644(Itpr3),ENSMUSG00000034656(Cacna1a),ENSMUSG00000026228(Htr2b)	http://www.kegg.jp/kegg-bin/show_pathway?map04726/K04960%09%23FFFFFF,green/K04157%09%23FFFFFF,purple/K16342%09%23FFFFFF,red/K04536%09%23FFFFFF,red/K19662%09%23FFFFFF,red/K04520%09%23FFFFFF,red/K04344%09%23FFFFFF,green/K04543%09%23FFFFFF,green/K04347%09%23FFFFFF,red/K04538%09%23FFFFFF,red/K04634%09%23FFFFFF,red/K08014%09%23FFFFFF,green/K04365%09%23FFFFFF,red/K11987%09%23FFFFFF,red/K07418%09%23FFFF…
mmu00010	Glycolysis / Gluconeogenesis	Metabolism	Carbohydrate metabolism	8	5	13	67	0.848398	1	ENSMUSG00000021196(Pfkp),ENSMUSG00000024896(Minpp1),ENSMUSG00000057666(Gapdh),ENSMUSG00000062070(Pgk1),ENSMUSG00000020664(Dld),ENSMUSG00000000628(Hk2),ENSMUSG00000055301(Adh7),ENSMUSG00000020277(Pfkl)	ENSMUSG00000061099(Gapdhs),ENSMUSG00000027452(Acss1),ENSMUSG00000026687(Aldh9a1),ENSMUSG00000060600(Eno3),ENSMUSG00000040618(Pck2)	http://www.kegg.jp/kegg-bin/show_pathway?map00010/K13951%09%23FFFFFF,red/K01895%09%23FFFFFF,green/K01689%09%23FFFFFF,green/K03103%09%23FFFFFF,red/K00844%09%23FFFFFF,red/K01596%09%23FFFFFF,green/K00382%09%23FFFFFF,red/K10705%09%23FFFFFF,green/K00927%09%23FFFFFF,red/K00134%09%23FFFFFF,red/K00149%09%23FFFFFF,green/K00850%09%23FFFFFF,red/
mmu04918	Thyroid hormone synthesis	Organismal Systems	Endocrine system	6	8	14	72	0.853095	1	ENSMUSG00000031584(Gsr),ENSMUSG00000026864(Hspa5),ENSMUSG00000024639(Gnaq),ENSMUSG00000053007(Creb5),ENSMUSG00000024960(Plcb3),ENSMUSG00000052889(Prkcb)	ENSMUSG00000038648(Creb3l2),ENSMUSG00000040061(Plcb2),ENSMUSG00000005469(Prkaca),ENSMUSG00000031659(Adcy7),ENSMUSG00000020654(Adcy3),ENSMUSG00000033222(Ttf2),ENSMUSG00000042644(Itpr3),ENSMUSG00000005580(Adcy9)	http://www.kegg.jp/kegg-bin/show_pathway?map04918/K09490%09%23FFFFFF,red/K19662%09%23FFFFFF,red/K08047%09%23FFFFFF,green/K04345%09%23FFFFFF,green/K08043%09%23FFFFFF,green/K04960%09%23FFFFFF,green/K15173%09%23FFFFFF,green/K09048%09%23FFFFFF,green/K09047%09%23FFFFFF,red/K04634%09%23FFFFFF,red/K00383%09%23FFFFFF,red/K08049%09%23FFFFFF,green/K05858%09%23FFFFFF,purple/
mmu00430	Taurine and hypotaurine metabolism	Metabolism	Metabolism of other amino acids	0	2	2	13	0.856131	1	-	ENSMUSG00000023044(Csad),ENSMUSG00000006344(Ggt5)	http://www.kegg.jp/kegg-bin/show_pathway?map00430/K18592%09%23FFFFFF,green/K01594%09%23FFFFFF,green/
mmu05217	Basal cell carcinoma	Human Diseases	Cancers: Specific types	6	6	12	63	0.85907	1	ENSMUSG00000033227(Wnt6),ENSMUSG00000044674(Fzd1),ENSMUSG00000023067(Cdkn1a),ENSMUSG00000057789(Bak1),ENSMUSG00000015312(Gadd45b),ENSMUSG00000045005(Fzd5)	ENSMUSG00000021668(Polk),ENSMUSG00000020888(Dvl2),ENSMUSG00000001761(Smo),ENSMUSG00000050382(Kif7),ENSMUSG00000002109(Ddb2),ENSMUSG00000021453(Gadd45g)	http://www.kegg.jp/kegg-bin/show_pathway?map05217/K06625%09%23FFFFFF,red/K02375%09%23FFFFFF,red/K04402%09%23FFFFFF,purple/K10140%09%23FFFFFF,green/K02432%09%23FFFFFF,red/K00445%09%23FFFFFF,red/K18806%09%23FFFFFF,green/K06226%09%23FFFFFF,green/K03511%09%23FFFFFF,green/K14021%09%23FFFFFF,red/K02353%09%23FFFFFF,green/
mmu00330	Arginine and proline metabolism	Metabolism	Amino acid metabolism	2	8	10	54	0.867231	1	ENSMUSG00000020826(Nos2),ENSMUSG00000019916(P4ha1)	ENSMUSG00000003526(Prodh),ENSMUSG00000025190(Got1),ENSMUSG00000025176(Hoga1),ENSMUSG00000019718(L3hypdh),ENSMUSG00000028737(Aldh4a1),ENSMUSG00000026687(Aldh9a1),ENSMUSG00000028789(Azin2),ENSMUSG00000025007(Aldh18a1)	http://www.kegg.jp/kegg-bin/show_pathway?map00330/K00472%09%23FFFFFF,red/K18384%09%23FFFFFF,green/K13241%09%23FFFFFF,red/K12657%09%23FFFFFF,green/K01583%09%23FFFFFF,green/K14454%09%23FFFFFF,green/K18123%09%23FFFFFF,green/K00318%09%23FFFFFF,green/K00294%09%23FFFFFF,green/K00149%09%23FFFFFF,green/
mmu04972	Pancreatic secretion	Organismal Systems	Digestive system	11	10	21	106	0.871823	1	ENSMUSG00000031896(Ctrl),ENSMUSG00000026463(Atp2b4),ENSMUSG00000029082(Bst1),ENSMUSG00000029084(Cd38),ENSMUSG00000004771(Rab11a),ENSMUSG00000068798(Rap1a),ENSMUSG00000052681(Rap1b),ENSMUSG00000024639(Gnaq),ENSMUSG00000052889(Prkcb),ENSMUSG00000027562(Car2),ENSMUSG00000024960(Plcb3)	ENSMUSG00000040061(Plcb2),ENSMUSG00000020654(Adcy3),ENSMUSG00000001865(Cpa3),ENSMUSG00000031659(Adcy7),ENSMUSG00000028751(Pla2g2e),ENSMUSG00000042644(Itpr3),ENSMUSG00000005580(Adcy9),ENSMUSG00000048677(Tpcn2),ENSMUSG00000019066(Rab3d),ENSMUSG00000027999(Pla2g12a)	http://www.kegg.jp/kegg-bin/show_pathway?map04972/K01047%09%23FFFFFF,green/K07884%09%23FFFFFF,green/K08047%09%23FFFFFF,green/K04634%09%23FFFFFF,red/K01242%09%23FFFFFF,red/K07836%09%23FFFFFF,red/K18152%09%23FFFFFF,red/K08043%09%23FFFFFF,green/K04960%09%23FFFFFF,green/K05850%09%23FFFFFF,red/K07904%09%23FFFFFF,red/K05858%09%23FFFFFF,purple/K04353%09%23FFFFFF,red/K08049%09%23FFFFFF,green/K14077%09%23…
mmu00400	Phenylalanine, tyrosine and tryptophan biosynthesis	Metabolism	Amino acid metabolism	0	1	1	8	0.888822	1	-	ENSMUSG00000025190(Got1)	http://www.kegg.jp/kegg-bin/show_pathway?map00400/K14454%09%23FFFFFF,green/
mmu04970	Salivary secretion	Organismal Systems	Digestive system	8	7	15	80	0.894169	1	ENSMUSG00000052889(Prkcb),ENSMUSG00000024960(Plcb3),ENSMUSG00000001175(Calm1),ENSMUSG00000024639(Gnaq),ENSMUSG00000029084(Cd38),ENSMUSG00000038357(Camp),ENSMUSG00000026463(Atp2b4),ENSMUSG00000029082(Bst1)	ENSMUSG00000005580(Adcy9),ENSMUSG00000042644(Itpr3),ENSMUSG00000045875(Adra1a),ENSMUSG00000020654(Adcy3),ENSMUSG00000005469(Prkaca),ENSMUSG00000031659(Adcy7),ENSMUSG00000040061(Plcb2)	http://www.kegg.jp/kegg-bin/show_pathway?map04970/K05858%09%23FFFFFF,purple/K01242%09%23FFFFFF,red/K05850%09%23FFFFFF,red/K04135%09%23FFFFFF,green/K04960%09%23FFFFFF,green/K18152%09%23FFFFFF,red/K04345%09%23FFFFFF,green/K04634%09%23FFFFFF,red/K08047%09%23FFFFFF,green/K19662%09%23FFFFFF,red/K13916%09%23FFFFFF,red/K08049%09%23FFFFFF,green/K08043%09%23FFFFFF,green/K02183%09%23FFFFFF,red/
mmu04924	Renin secretion	Organismal Systems	Endocrine system	6	7	13	71	0.900285	1	ENSMUSG00000039942(Ptger4),ENSMUSG00000024960(Plcb3),ENSMUSG00000001175(Calm1),ENSMUSG00000024639(Gnaq),ENSMUSG00000000001(Gnai3),ENSMUSG00000022092(Ppp3cc)	ENSMUSG00000042644(Itpr3),ENSMUSG00000027931(Npr1),ENSMUSG00000005469(Prkaca),ENSMUSG00000037759(Ptger2),ENSMUSG00000004347(Pde1c),ENSMUSG00000040061(Plcb2),ENSMUSG00000030671(Pde3b)	http://www.kegg.jp/kegg-bin/show_pathway?map04924/K04630%09%23FFFFFF,red/K04345%09%23FFFFFF,green/K05858%09%23FFFFFF,purple/K12323%09%23FFFFFF,green/K04348%09%23FFFFFF,red/K04960%09%23FFFFFF,green/K04261%09%23FFFFFF,red/K02183%09%23FFFFFF,red/K04634%09%23FFFFFF,red/K04259%09%23FFFFFF,green/K13296%09%23FFFFFF,green/K13755%09%23FFFFFF,green/
mmu05030	Cocaine addiction	Human Diseases	Substance dependence	5	3	8	47	0.906485	1	ENSMUSG00000028163(Nfkb1),ENSMUSG00000000001(Gnai3),ENSMUSG00000020599(Rgs9),ENSMUSG00000053007(Creb5),ENSMUSG00000024927(Rela)	ENSMUSG00000052684(Jun),ENSMUSG00000038648(Creb3l2),ENSMUSG00000005469(Prkaca)	http://www.kegg.jp/kegg-bin/show_pathway?map05030/K02580%09%23FFFFFF,red/K04448%09%23FFFFFF,green/K04345%09%23FFFFFF,green/K13765%09%23FFFFFF,red/K09047%09%23FFFFFF,red/K09048%09%23FFFFFF,green/K04630%09%23FFFFFF,red/K04735%09%23FFFFFF,red/
mmu04961	Endocrine and other factor-regulated calcium reabsorption	Organismal Systems	Excretory system	5	4	9	52	0.906504	1	ENSMUSG00000035152(Ap2b1),ENSMUSG00000004771(Rab11a),ENSMUSG00000024639(Gnaq),ENSMUSG00000024960(Plcb3),ENSMUSG00000052889(Prkcb)	ENSMUSG00000022479(Vdr),ENSMUSG00000040061(Plcb2),ENSMUSG00000005469(Prkaca),ENSMUSG00000005580(Adcy9)	http://www.kegg.jp/kegg-bin/show_pathway?map04961/K07904%09%23FFFFFF,red/K11825%09%23FFFFFF,red/K05858%09%23FFFFFF,purple/K19662%09%23FFFFFF,red/K08539%09%23FFFFFF,green/K08049%09%23FFFFFF,green/K04345%09%23FFFFFF,green/K04634%09%23FFFFFF,red/
mmu04966	Collecting duct acid secretion	Organismal Systems	Excretory system	2	2	4	27	0.917568	1	ENSMUSG00000027562(Car2),ENSMUSG00000019210(Atp6v1e1)	ENSMUSG00000019302(Atp6v0a1),ENSMUSG00000028238(Atp6v0d2)	http://www.kegg.jp/kegg-bin/show_pathway?map04966/K02146%09%23FFFFFF,green/K02154%09%23FFFFFF,green/K02150%09%23FFFFFF,red/K18245%09%23FFFFFF,red/
mmu04973	Carbohydrate digestion and absorption	Organismal Systems	Digestive system	5	2	7	43	0.919499	1	ENSMUSG00000028698(Pik3r3),ENSMUSG00000041417(Pik3r1),ENSMUSG00000039936(Pik3cd),ENSMUSG00000052889(Prkcb),ENSMUSG00000000628(Hk2)	ENSMUSG00000031834(Pik3r2),ENSMUSG00000032114(Slc37a4)	http://www.kegg.jp/kegg-bin/show_pathway?map04973/K19662%09%23FFFFFF,red/K00844%09%23FFFFFF,red/K08171%09%23FFFFFF,green/K00922%09%23FFFFFF,red/K02649%09%23FFFFFF,purple/
mmu00350	Tyrosine metabolism	Metabolism	Amino acid metabolism	2	4	6	39	0.932882	1	ENSMUSG00000055301(Adh7),ENSMUSG00000063558(Aox1)	ENSMUSG00000025190(Got1),ENSMUSG00000021033(Gstz1),ENSMUSG00000000326(Comt),ENSMUSG00000045316(Fahd1)	http://www.kegg.jp/kegg-bin/show_pathway?map00350/K14454%09%23FFFFFF,green/K01800%09%23FFFFFF,green/K01557%09%23FFFFFF,green/K13951%09%23FFFFFF,red/K00157%09%23FFFFFF,red/K00545%09%23FFFFFF,green/
mmu00040	Pentose and glucuronate interconversions	Metabolism	Carbohydrate metabolism	1	4	5	34	0.9367	1	ENSMUSG00000026005(Rpe)	ENSMUSG00000043153(Crppa),ENSMUSG00000011382(Dhdh),ENSMUSG00000035769(Xylb),ENSMUSG00000027227(Sord)	http://www.kegg.jp/kegg-bin/show_pathway?map00040/K00854%09%23FFFFFF,green/K00008%09%23FFFFFF,green/K00078%09%23FFFFFF,green/K21031%09%23FFFFFF,green/K01783%09%23FFFFFF,red/
mmu04976	Bile secretion	Organismal Systems	Digestive system	6	8	14	80	0.937149	1	ENSMUSG00000032849(Abcc4),ENSMUSG00000028645(Slc2a1),ENSMUSG00000027562(Car2),ENSMUSG00000032204(Aqp9),ENSMUSG00000021670(Hmgcr),ENSMUSG00000032193(Ldlr)	ENSMUSG00000020654(Adcy3),ENSMUSG00000005469(Prkaca),ENSMUSG00000031659(Adcy7),ENSMUSG00000005580(Adcy9),ENSMUSG00000020865(Abcc3),ENSMUSG00000027698(Nceh1),ENSMUSG00000037936(Scarb1),ENSMUSG00000015846(Rxra)	http://www.kegg.jp/kegg-bin/show_pathway?map04976/K05673%09%23FFFFFF,red/K18245%09%23FFFFFF,red/K00021%09%23FFFFFF,red/K12473%09%23FFFFFF,red/K13885%09%23FFFFFF,green/K04345%09%23FFFFFF,green/K14349%09%23FFFFFF,green/K08047%09%23FFFFFF,green/K08524%09%23FFFFFF,green/K07299%09%23FFFFFF,red/K05667%09%23FFFFFF,green/K08049%09%23FFFFFF,green/K08043%09%23FFFFFF,green/K09877%09%23FFFFFF,red/
mmu04978	Mineral absorption	Organismal Systems	Digestive system	4	2	6	40	0.942613	1	ENSMUSG00000066150(Slc31a1),ENSMUSG00000063354(Slc39a4),ENSMUSG00000005413(Hmox1),ENSMUSG00000023030(Slc11a2)	ENSMUSG00000025993(Slc40a1),ENSMUSG00000022479(Vdr)	http://www.kegg.jp/kegg-bin/show_pathway?map04978/K00510%09%23FFFFFF,red/K14710%09%23FFFFFF,red/K21398%09%23FFFFFF,red/K08539%09%23FFFFFF,green/K14685%09%23FFFFFF,green/K14686%09%23FFFFFF,red/
mmu00260	Glycine, serine and threonine metabolism	Metabolism	Amino acid metabolism	3	3	6	40	0.942613	1	ENSMUSG00000024640(Psat1),ENSMUSG00000020664(Dld),ENSMUSG00000028179(Cth)	ENSMUSG00000035637(Grhpr),ENSMUSG00000032607(Amt),ENSMUSG00000034424(Gcsh)	http://www.kegg.jp/kegg-bin/show_pathway?map00260/K00605%09%23FFFFFF,green/K01758%09%23FFFFFF,red/K00049%09%23FFFFFF,green/K00382%09%23FFFFFF,red/K02437%09%23FFFFFF,green/K00831%09%23FFFFFF,red/
mmu05031	Amphetamine addiction	Human Diseases	Substance dependence	6	5	11	66	0.943675	1	ENSMUSG00000014956(Ppp1cb),ENSMUSG00000053819(Camk2d),ENSMUSG00000052889(Prkcb),ENSMUSG00000001175(Calm1),ENSMUSG00000022092(Ppp3cc),ENSMUSG00000053007(Creb5)	ENSMUSG00000052684(Jun),ENSMUSG00000021820(Camk2g),ENSMUSG00000038648(Creb3l2),ENSMUSG00000021250(Fos),ENSMUSG00000005469(Prkaca)	http://www.kegg.jp/kegg-bin/show_pathway?map05031/K04379%09%23FFFFFF,green/K02183%09%23FFFFFF,red/K04345%09%23FFFFFF,green/K19662%09%23FFFFFF,red/K09048%09%23FFFFFF,green/K04348%09%23FFFFFF,red/K04515%09%23FFFFFF,purple/K06269%09%23FFFFFF,red/K09047%09%23FFFFFF,red/K04448%09%23FFFFFF,green/
mmu00130	Ubiquinone and other terpenoid-quinone biosynthesis	Metabolism	Metabolism of cofactors and vitamins	0	1	1	11	0.951233	1	-	ENSMUSG00000053460(Ggcx)	http://www.kegg.jp/kegg-bin/show_pathway?map00130/K10106%09%23FFFFFF,green/
mmu04723	Retrograde endocannabinoid signaling	Organismal Systems	Nervous system	10	15	25	139	0.964978	1	ENSMUSG00000052889(Prkcb),ENSMUSG00000024960(Plcb3),ENSMUSG00000024639(Gnaq),ENSMUSG00000036402(Gng12),ENSMUSG00000021936(Mapk8),ENSMUSG00000032487(Ptgs2),ENSMUSG00000027669(Gnb4),ENSMUSG00000053137(Mapk11),ENSMUSG00000029064(Gnb1),ENSMUSG00000000001(Gnai3)	ENSMUSG00000039206(Daglb),ENSMUSG00000042644(Itpr3),ENSMUSG00000034656(Cacna1a),ENSMUSG00000020654(Adcy3),ENSMUSG00000040061(Plcb2),ENSMUSG00000043004(Gng2),ENSMUSG00000035735(Dagla),ENSMUSG00000005580(Adcy9),ENSMUSG00000038607(Gng10),ENSMUSG00000024038(Ndufv3),ENSMUSG00000032192(Gnb5),ENSMUSG00000031659(Adcy7),ENSMUSG00000005469(Prkaca),ENSMUSG00000044968(Napepld),ENSMUSG00000048240(Gng7)	http://www.kegg.jp/kegg-bin/show_pathway?map04723/K04545%09%23FFFFFF,green/K04634%09%23FFFFFF,red/K08043%09%23FFFFFF,green/K04441%09%23FFFFFF,red/K08047%09%23FFFFFF,green/K03944%09%23FFFFFF,green/K04630%09%23FFFFFF,red/K04345%09%23FFFFFF,green/K07826%09%23FFFFFF,green/K13985%09%23FFFFFF,green/K04538%09%23FFFFFF,red/K11987%09%23FFFFFF,red/K08049%09%23FFFFFF,green/K04960%09%23FFFFFF,green/K04440%09…
mmu00590	Arachidonic acid metabolism	Metabolism	Lipid metabolism	6	8	14	85	0.965244	1	ENSMUSG00000032487(Ptgs2),ENSMUSG00000071072(Ptges3),ENSMUSG00000056220(Pla2g4a),ENSMUSG00000033847(Pla2g4c),ENSMUSG00000060675(Plaat3),ENSMUSG00000050737(Ptges)	ENSMUSG00000047250(Ptgs1),ENSMUSG00000051483(Cbr1),ENSMUSG00000015224(Cyp2j9),ENSMUSG00000015889(Lta4h),ENSMUSG00000006344(Ggt5),ENSMUSG00000028751(Pla2g2e),ENSMUSG00000027999(Pla2g12a),ENSMUSG00000029919(Hpgds)	http://www.kegg.jp/kegg-bin/show_pathway?map00590/K07418%09%23FFFFFF,green/K00079%09%23FFFFFF,green/K18592%09%23FFFFFF,green/K04097%09%23FFFFFF,green/K15730%09%23FFFFFF,red/K15729%09%23FFFFFF,red/K11987%09%23FFFFFF,red/K01254%09%23FFFFFF,green/K01047%09%23FFFFFF,green/K16817%09%23FFFFFF,red/K16342%09%23FFFFFF,red/K00509%09%23FFFFFF,green/
mmu03015	mRNA surveillance pathway	Genetic Information Processing	Translation	14	1	15	92	0.972629	1	ENSMUSG00000042772(Smg7),ENSMUSG00000024360(Etf1),ENSMUSG00000041769(Ppp2r2d),ENSMUSG00000022283(Pabpc1),ENSMUSG00000022052(Ppp2r2a),ENSMUSG00000041781(Cpsf2),ENSMUSG00000062203(Gspt1),ENSMUSG00000030188(Magohb),ENSMUSG00000031256(Cstf2),ENSMUSG00000026626(Ppp2r5a),ENSMUSG00000010097(Nxf1),ENSMUSG00000020349(Ppp2ca),ENSMUSG00000009630(Ppp2cb),ENSMUSG00000014956(Ppp1cb)	ENSMUSG00000071723(Gspt2)	http://www.kegg.jp/kegg-bin/show_pathway?map03015/K12877%09%23FFFFFF,red/K14402%09%23FFFFFF,red/K14284%09%23FFFFFF,red/K14409%09%23FFFFFF,red/K06269%09%23FFFFFF,red/K13126%09%23FFFFFF,red/K14407%09%23FFFFFF,red/K03265%09%23FFFFFF,red/K04354%09%23FFFFFF,red/K03267%09%23FFFFFF,purple/K04382%09%23FFFFFF,red/K11584%09%23FFFFFF,red/
mmu00020	Citrate cycle (TCA cycle)	Metabolism	Carbohydrate metabolism	3	1	4	33	0.972646	1	ENSMUSG00000024892(Pcx),ENSMUSG00000020664(Dld),ENSMUSG00000005683(Cs)	ENSMUSG00000040618(Pck2)	http://www.kegg.jp/kegg-bin/show_pathway?map00020/K01596%09%23FFFFFF,green/K01647%09%23FFFFFF,red/K00382%09%23FFFFFF,red/K01958%09%23FFFFFF,red/
mmu04721	Synaptic vesicle cycle	Organismal Systems	Nervous system	3	6	9	61	0.973015	1	ENSMUSG00000026797(Stxbp1),ENSMUSG00000035152(Ap2b1),ENSMUSG00000019210(Atp6v1e1)	ENSMUSG00000034799(Unc13a),ENSMUSG00000028456(Unc13b),ENSMUSG00000034656(Cacna1a),ENSMUSG00000028238(Atp6v0d2),ENSMUSG00000031840(Rab3a),ENSMUSG00000019302(Atp6v0a1)	http://www.kegg.jp/kegg-bin/show_pathway?map04721/K15293%09%23FFFFFF,green/K11825%09%23FFFFFF,red/K02154%09%23FFFFFF,green/K07882%09%23FFFFFF,green/K02146%09%23FFFFFF,green/K04344%09%23FFFFFF,green/K15292%09%23FFFFFF,red/K02150%09%23FFFFFF,red/
mmu04744	Phototransduction	Organismal Systems	Sensory system	3	0	3	27	0.973178	1	ENSMUSG00000020599(Rgs9),ENSMUSG00000029064(Gnb1),ENSMUSG00000001175(Calm1)	-	http://www.kegg.jp/kegg-bin/show_pathway?map04744/K04536%09%23FFFFFF,red/K13765%09%23FFFFFF,red/K02183%09%23FFFFFF,red/
mmu03060	Protein export	Genetic Information Processing	Folding, sorting and degradation	3	0	3	27	0.973178	1	ENSMUSG00000026864(Hspa5),ENSMUSG00000079108(Srp54c),ENSMUSG00000032042(Srpr)	-	http://www.kegg.jp/kegg-bin/show_pathway?map03060/K13431%09%23FFFFFF,red/K09490%09%23FFFFFF,red/K03106%09%23FFFFFF,red/
mmu00980	Metabolism of xenobiotics by cytochrome P450	Metabolism	Xenobiotics biodegradation and metabolism	2	8	10	69	0.981729	1	ENSMUSG00000001663(Gstt1),ENSMUSG00000055301(Adh7)	ENSMUSG00000029919(Hpgds),ENSMUSG00000040703(Cyp2s1),ENSMUSG00000004032(Gstm5),ENSMUSG00000001665(Gstt3),ENSMUSG00000051483(Cbr1),ENSMUSG00000033318(Gstt2),ENSMUSG00000011382(Dhdh),ENSMUSG00000028743(Akr7a5)	http://www.kegg.jp/kegg-bin/show_pathway?map00980/K04097%09%23FFFFFF,green/K13951%09%23FFFFFF,red/K07420%09%23FFFFFF,green/K00079%09%23FFFFFF,green/K00799%09%23FFFFFF,purple/K15303%09%23FFFFFF,green/K00078%09%23FFFFFF,green/
mmu00591	Linoleic acid metabolism	Metabolism	Lipid metabolism	3	3	6	49	0.987401	1	ENSMUSG00000060675(Plaat3),ENSMUSG00000056220(Pla2g4a),ENSMUSG00000033847(Pla2g4c)	ENSMUSG00000028751(Pla2g2e),ENSMUSG00000015224(Cyp2j9),ENSMUSG00000027999(Pla2g12a)	http://www.kegg.jp/kegg-bin/show_pathway?map00591/K07418%09%23FFFFFF,green/K01047%09%23FFFFFF,green/K16817%09%23FFFFFF,red/K16342%09%23FFFFFF,red/
mmu04975	Fat digestion and absorption	Organismal Systems	Digestive system	1	3	4	37	0.9875	1	ENSMUSG00000021759(Plpp1)	ENSMUSG00000037936(Scarb1),ENSMUSG00000028751(Pla2g2e),ENSMUSG00000027999(Pla2g12a)	http://www.kegg.jp/kegg-bin/show_pathway?map04975/K01080%09%23FFFFFF,red/K01047%09%23FFFFFF,green/K13885%09%23FFFFFF,green/
mmu05010	Alzheimer's disease	Human Diseases	Neurodegenerative diseases	18	10	28	165	0.989056	1	ENSMUSG00000030341(Tnfrsf1a),ENSMUSG00000019979(Apaf1),ENSMUSG00000024401(Tnf),ENSMUSG00000057666(Gapdh),ENSMUSG00000063694(Cycs),ENSMUSG00000032375(Aph1b),ENSMUSG00000004446(Bid),ENSMUSG00000025887(Casp12),ENSMUSG00000022092(Ppp3cc),ENSMUSG00000027398(Il1b),ENSMUSG00000022892(App),ENSMUSG00000025076(Casp7),ENSMUSG00000001175(Calm1),ENSMUSG00000052593(Adam17),ENSMUSG00000024960(Plcb3),ENSMUSG0000…	ENSMUSG00000040061(Plcb2),ENSMUSG00000010609(Psen2),ENSMUSG00000042644(Itpr3),ENSMUSG00000056999(Ide),ENSMUSG00000031668(Eif2ak3),ENSMUSG00000053040(Aph1c),ENSMUSG00000040249(Lrp1),ENSMUSG00000024038(Ndufv3),ENSMUSG00000031077(Fadd),ENSMUSG00000028914(Casp9)	http://www.kegg.jp/kegg-bin/show_pathway?map05010/K04741%09%23FFFFFF,red/K04634%09%23FFFFFF,red/K04397%09%23FFFFFF,red/K04522%09%23FFFFFF,green/K08860%09%23FFFFFF,green/K03156%09%23FFFFFF,red/K04390%09%23FFFFFF,red/K05858%09%23FFFFFF,purple/K03944%09%23FFFFFF,green/K02183%09%23FFFFFF,red/K04520%09%23FFFFFF,red/K01408%09%23FFFFFF,green/K06172%09%23FFFFFF,purple/K04519%09%23FFFFFF,red/K04399%09%23F…
mmu05034	Alcoholism	Human Diseases	Substance dependence	18	15	33	193	0.992295	1	ENSMUSG00000004936(Map2k1),ENSMUSG00000001175(Calm1),ENSMUSG00000002413(Braf),ENSMUSG00000014956(Ppp1cb),ENSMUSG00000024241(Sos1),ENSMUSG00000060743(H3f3a),ENSMUSG00000027018(Hat1),ENSMUSG00000020178(Adora2a),ENSMUSG00000037894(H2az1),ENSMUSG00000036402(Gng12),ENSMUSG00000029471(Camkk2),ENSMUSG00000028800(Hdac1),ENSMUSG00000053007(Creb5),ENSMUSG00000018500(Adora2b),ENSMUSG00000029064(Gnb1),ENSMUS…	ENSMUSG00000067567(Hdac8),ENSMUSG00000035109(Shc4),ENSMUSG00000043004(Gng2),ENSMUSG00000038648(Creb3l2),ENSMUSG00000032192(Gnb5),ENSMUSG00000068854(H2bc21),ENSMUSG00000041126(H2az2),ENSMUSG00000020312(Shc2),ENSMUSG00000038607(Gng10),ENSMUSG00000069272(H2ac8),ENSMUSG00000020086(Macroh2a2),ENSMUSG00000048240(Gng7),ENSMUSG00000062906(Hdac10),ENSMUSG00000008855(Hdac5),ENSMUSG00000031161(Hdac6)	http://www.kegg.jp/kegg-bin/show_pathway?map05034/K07359%09%23FFFFFF,red/K04368%09%23FFFFFF,red/K11406%09%23FFFFFF,green/K04347%09%23FFFFFF,red/K17449%09%23FFFFFF,green/K04539%09%23FFFFFF,green/K04543%09%23FFFFFF,green/K02183%09%23FFFFFF,red/K04630%09%23FFFFFF,red/K06269%09%23FFFFFF,red/K04266%09%23FFFFFF,red/K04536%09%23FFFFFF,red/K04365%09%23FFFFFF,red/K09048%09%23FFFFFF,green/K11253%09%23FFFFF…
mmu00982	Drug metabolism - cytochrome P450	Metabolism	Xenobiotics biodegradation and metabolism	3	5	8	67	0.995824	1	ENSMUSG00000001663(Gstt1),ENSMUSG00000063558(Aox1),ENSMUSG00000055301(Adh7)	ENSMUSG00000004032(Gstm5),ENSMUSG00000029919(Hpgds),ENSMUSG00000033318(Gstt2),ENSMUSG00000028088(Fmo5),ENSMUSG00000001665(Gstt3)	http://www.kegg.jp/kegg-bin/show_pathway?map00982/K00799%09%23FFFFFF,purple/K13951%09%23FFFFFF,red/K00485%09%23FFFFFF,green/K00157%09%23FFFFFF,red/K04097%09%23FFFFFF,green/
mmu04614	Renin-angiotensin system	Organismal Systems	Endocrine system	2	1	3	36	0.996187	1	ENSMUSG00000019849(Prep),ENSMUSG00000023845(Lnpep)	ENSMUSG00000001865(Cpa3)	http://www.kegg.jp/kegg-bin/show_pathway?map04614/K08780%09%23FFFFFF,green/K01257%09%23FFFFFF,red/K01322%09%23FFFFFF,red/
mmu00360	Phenylalanine metabolism	Metabolism	Amino acid metabolism	0	1	1	22	0.997628	1	-	ENSMUSG00000025190(Got1)	http://www.kegg.jp/kegg-bin/show_pathway?map00360/K14454%09%23FFFFFF,green/
mmu00983	Drug metabolism - other enzymes	Metabolism	Xenobiotics biodegradation and metabolism	2	9	11	88	0.99774	1	ENSMUSG00000020407(Upp1),ENSMUSG00000001663(Gstt1)	ENSMUSG00000030978(Rrm1),ENSMUSG00000027203(Dut),ENSMUSG00000026575(Nme7),ENSMUSG00000001665(Gstt3),ENSMUSG00000024177(Nme4),ENSMUSG00000033318(Gstt2),ENSMUSG00000022814(Umps),ENSMUSG00000035824(Tk2),ENSMUSG00000004032(Gstm5)	http://www.kegg.jp/kegg-bin/show_pathway?map00983/K00799%09%23FFFFFF,purple/K00940%09%23FFFFFF,green/K00757%09%23FFFFFF,red/K13421%09%23FFFFFF,green/K01520%09%23FFFFFF,green/K10807%09%23FFFFFF,green/K00857%09%23FFFFFF,green/
mmu05012	Parkinson's disease	Human Diseases	Neurodegenerative diseases	10	7	17	127	0.999019	1	ENSMUSG00000063694(Cycs),ENSMUSG00000020178(Adora2a),ENSMUSG00000000001(Gnai3),ENSMUSG00000032596(Uba7),ENSMUSG00000019979(Apaf1),ENSMUSG00000027078(Ube2l6),ENSMUSG00000029223(Uchl1),ENSMUSG00000036273(Lrrk2),ENSMUSG00000028277(Ube2j1),ENSMUSG00000008892(Vdac3)	ENSMUSG00000023826(Prkn),ENSMUSG00000024534(Sncaip),ENSMUSG00000068329(Htra2),ENSMUSG00000005469(Prkaca),ENSMUSG00000028914(Casp9),ENSMUSG00000028756(Pink1),ENSMUSG00000024038(Ndufv3)	http://www.kegg.jp/kegg-bin/show_pathway?map05012/K04266%09%23FFFFFF,red/K03944%09%23FFFFFF,green/K02084%09%23FFFFFF,red/K08669%09%23FFFFFF,green/K04345%09%23FFFFFF,green/K04553%09%23FFFFFF,red/K04630%09%23FFFFFF,red/K10578%09%23FFFFFF,red/K05611%09%23FFFFFF,red/K08844%09%23FFFFFF,red/K15041%09%23FFFFFF,red/K08738%09%23FFFFFF,red/K04556%09%23FFFFFF,green/K04558%09%23FFFFFF,green/K10698%09%23FFFFF…
mmu04260	Cardiac muscle contraction	Organismal Systems	Circulatory system	6	1	7	71	0.999345	1	ENSMUSG00000003352(Cacnb3),ENSMUSG00000031799(Tpm4),ENSMUSG00000027940(Tpm3),ENSMUSG00000053395(Cacng8),ENSMUSG00000026414(Tnnt2),ENSMUSG00000078815(Cacng6)	ENSMUSG00000035458(Tnni3)	http://www.kegg.jp/kegg-bin/show_pathway?map04260/K04873%09%23FFFFFF,red/K12045%09%23FFFFFF,red/K10375%09%23FFFFFF,red/K12044%09%23FFFFFF,green/K04871%09%23FFFFFF,red/K09290%09%23FFFFFF,red/K04864%09%23FFFFFF,red/
mmu00053	Ascorbate and aldarate metabolism	Metabolism	Carbohydrate metabolism	0	1	1	27	0.9994	1	-	ENSMUSG00000026687(Aldh9a1)	http://www.kegg.jp/kegg-bin/show_pathway?map00053/K00149%09%23FFFFFF,green/
mmu04950	Maturity onset diabetes of the young	Human Diseases	Endocrine and metabolic diseases	0	1	1	27	0.9994	1	-	ENSMUSG00000024986(Hhex)	http://www.kegg.jp/kegg-bin/show_pathway?map04950/K08024%09%23FFFFFF,green/
mmu05016	Huntington's disease	Human Diseases	Neurodegenerative diseases	15	11	26	183	0.999645	1	ENSMUSG00000006818(Sod2),ENSMUSG00000026029(Casp8),ENSMUSG00000024639(Gnaq),ENSMUSG00000053007(Creb5),ENSMUSG00000028800(Hdac1),ENSMUSG00000008892(Vdac3),ENSMUSG00000022262(Dnah5),ENSMUSG00000032965(Ift57),ENSMUSG00000024960(Plcb3),ENSMUSG00000031783(Polr2c),ENSMUSG00000035152(Ap2b1),ENSMUSG00000033987(Dnah17),ENSMUSG00000019979(Apaf1),ENSMUSG00000037820(Tgm2),ENSMUSG00000063694(Cycs)	ENSMUSG00000039959(Hip1),ENSMUSG00000024038(Ndufv3),ENSMUSG00000028914(Casp9),ENSMUSG00000002083(Bbc3),ENSMUSG00000019738(Polr2i),ENSMUSG00000004667(Polr2e),ENSMUSG00000040061(Plcb2),ENSMUSG00000042523(Dnal1),ENSMUSG00000000440(Pparg),ENSMUSG00000005198(Polr2a),ENSMUSG00000038648(Creb3l2)	http://www.kegg.jp/kegg-bin/show_pathway?map05016/K10408%09%23FFFFFF,red/K03011%09%23FFFFFF,red/K04634%09%23FFFFFF,red/K03006%09%23FFFFFF,green/K06067%09%23FFFFFF,red/K02084%09%23FFFFFF,red/K04559%09%23FFFFFF,green/K08530%09%23FFFFFF,green/K04399%09%23FFFFFF,green/K05625%09%23FFFFFF,red/K04398%09%23FFFFFF,red/K08738%09%23FFFFFF,red/K04564%09%23FFFFFF,red/K05858%09%23FFFFFF,purple/K03017%09%23FFFF…
mmu04974	Protein digestion and absorption	Organismal Systems	Digestive system	7	3	10	94	0.999708	1	ENSMUSG00000019838(Slc16a10),ENSMUSG00000031896(Ctrl),ENSMUSG00000004098(Col5a3),ENSMUSG00000045672(Col27a1),ENSMUSG00000027570(Col9a3),ENSMUSG00000001435(Col18a1),ENSMUSG00000031503(Col4a2)	ENSMUSG00000001865(Cpa3),ENSMUSG00000054640(Slc8a1),ENSMUSG00000020600(Slc7a15)	http://www.kegg.jp/kegg-bin/show_pathway?map04974/K08131%09%23FFFFFF,red/K08187%09%23FFFFFF,red/K05849%09%23FFFFFF,green/K09632%09%23FFFFFF,red/K13868%09%23FFFFFF,green/K06823%09%23FFFFFF,red/K08780%09%23FFFFFF,green/K19721%09%23FFFFFF,red/K06237%09%23FFFFFF,red/
mmu05204	Chemical carcinogenesis	Human Diseases	Cancers: Overview	3	6	9	97	0.999949	1	ENSMUSG00000001663(Gstt1),ENSMUSG00000032487(Ptgs2),ENSMUSG00000055301(Adh7)	ENSMUSG00000004032(Gstm5),ENSMUSG00000029919(Hpgds),ENSMUSG00000039648(Kyat1),ENSMUSG00000051483(Cbr1),ENSMUSG00000001665(Gstt3),ENSMUSG00000033318(Gstt2)	http://www.kegg.jp/kegg-bin/show_pathway?map05204/K13951%09%23FFFFFF,red/K00079%09%23FFFFFF,green/K00816%09%23FFFFFF,green/K11987%09%23FFFFFF,red/K04097%09%23FFFFFF,green/K00799%09%23FFFFFF,purple/
mmu04714	Thermogenesis	Organismal Systems	Environmental adaptation	14	14	28	212	0.999972	1	ENSMUSG00000035505(Cox18),ENSMUSG00000024981(Acsl5),ENSMUSG00000031278(Acsl4),ENSMUSG00000024241(Sos1),ENSMUSG00000071369(Map3k5),ENSMUSG00000026112(Coa5),ENSMUSG00000028945(Rheb),ENSMUSG00000053137(Mapk11),ENSMUSG00000037935(Smarce1),ENSMUSG00000062825(Actg1),ENSMUSG00000029580(Actb),ENSMUSG00000018796(Acsl1),ENSMUSG00000003123(Lipe),ENSMUSG00000053007(Creb5)	ENSMUSG00000000440(Pparg),ENSMUSG00000038648(Creb3l2),ENSMUSG00000024082(Ndufaf7),ENSMUSG00000028944(Prkag2),ENSMUSG00000051671(Coa6),ENSMUSG00000005580(Adcy9),ENSMUSG00000027931(Npr1),ENSMUSG00000025509(Pnpla2),ENSMUSG00000024038(Ndufv3),ENSMUSG00000024921(Smarca2),ENSMUSG00000020654(Adcy3),ENSMUSG00000031565(Fgfr1),ENSMUSG00000031659(Adcy7),ENSMUSG00000005469(Prkaca)	http://www.kegg.jp/kegg-bin/show_pathway?map04714/K18164%09%23FFFFFF,green/K08047%09%23FFFFFF,green/K04426%09%23FFFFFF,red/K04441%09%23FFFFFF,red/K08530%09%23FFFFFF,green/K07208%09%23FFFFFF,red/K03099%09%23FFFFFF,red/K04345%09%23FFFFFF,green/K08049%09%23FFFFFF,green/K07200%09%23FFFFFF,green/K16816%09%23FFFFFF,green/K04362%09%23FFFFFF,green/K05692%09%23FFFFFF,red/K08043%09%23FFFFFF,green/K03944%09…
mmu05033	Nicotine addiction	Human Diseases	Substance dependence	0	1	1	40	0.999983	1	-	ENSMUSG00000034656(Cacna1a)	http://www.kegg.jp/kegg-bin/show_pathway?map05033/K04344%09%23FFFFFF,green/
mmu04742	Taste transduction	Organismal Systems	Sensory system	0	6	6	87	0.999994	1	-	ENSMUSG00000027765(P2ry1),ENSMUSG00000034656(Cacna1a),ENSMUSG00000042644(Itpr3),ENSMUSG00000030340(Scnn1a),ENSMUSG00000005469(Prkaca),ENSMUSG00000004347(Pde1c)	http://www.kegg.jp/kegg-bin/show_pathway?map04742/K04345%09%23FFFFFF,green/K04960%09%23FFFFFF,green/K04344%09%23FFFFFF,green/K04270%09%23FFFFFF,green/K04824%09%23FFFFFF,green/K13755%09%23FFFFFF,green/
mmu00830	Retinol metabolism	Metabolism	Metabolism of cofactors and vitamins	2	3	5	94	1	1	ENSMUSG00000063558(Aox1),ENSMUSG00000055301(Adh7)	ENSMUSG00000066026(Dhrs3),ENSMUSG00000027068(Dhrs9),ENSMUSG00000040703(Cyp2s1)	http://www.kegg.jp/kegg-bin/show_pathway?map00830/K07420%09%23FFFFFF,green/K00157%09%23FFFFFF,red/K11149%09%23FFFFFF,green/K11146%09%23FFFFFF,green/K13951%09%23FFFFFF,red/
mmu00140	Steroid hormone biosynthesis	Metabolism	Lipid metabolism	2	2	4	90	1	1	ENSMUSG00000027195(Hsd17b12),ENSMUSG00000026675(Hsd17b7)	ENSMUSG00000019301(Hsd17b1),ENSMUSG00000000326(Comt)	http://www.kegg.jp/kegg-bin/show_pathway?map00140/K10251%09%23FFFFFF,red/K13373%09%23FFFFFF,red/K00545%09%23FFFFFF,green/K00044%09%23FFFFFF,green/
mmu04080	Neuroactive ligand-receptor interaction	Environmental Information Processing	Signaling molecules and interaction	23	14	37	319	1	1	ENSMUSG00000049929(Lpar4),ENSMUSG00000059588(Calcrl),ENSMUSG00000020178(Adora2a),ENSMUSG00000041736(Tspo),ENSMUSG00000043017(Ptgir),ENSMUSG00000049130(C5ar1),ENSMUSG00000038668(Lpar1),ENSMUSG00000045551(Fpr1),ENSMUSG00000048376(F2r),ENSMUSG00000024431(Nr3c1),ENSMUSG00000033470(Cysltr2),ENSMUSG00000023964(Calcr),ENSMUSG00000039942(Ptger4),ENSMUSG00000054293(P2ry10b),ENSMUSG00000022122(Ednrb),ENSMU…	ENSMUSG00000053004(Hrh1),ENSMUSG00000003378(Grik5),ENSMUSG00000027765(P2ry1),ENSMUSG00000020793(Galr2),ENSMUSG00000045092(S1pr1),ENSMUSG00000033446(Lpar6),ENSMUSG00000045875(Adra1a),ENSMUSG00000029468(P2rx7),ENSMUSG00000062585(Cnr2),ENSMUSG00000041189(Chrnb1),ENSMUSG00000026228(Htr2b),ENSMUSG00000026271(Gpr35),ENSMUSG00000048779(P2ry6),ENSMUSG00000037759(Ptger2)	http://www.kegg.jp/kegg-bin/show_pathway?map04080/K04288%09%23FFFFFF,green/K04273%09%23FFFFFF,green/K04259%09%23FFFFFF,green/K04266%09%23FFFFFF,red/K04010%09%23FFFFFF,red/K04576%09%23FFFFFF,red/K04278%09%23FFFFFF,green/K04263%09%23FFFFFF,red/K05205%09%23FFFFFF,green/K04270%09%23FFFFFF,green/K04276%09%23FFFFFF,green/K04135%09%23FFFFFF,green/K04274%09%23FFFFFF,red/K04149%09%23FFFFFF,green/K04172%09…
mmu00190	Oxidative phosphorylation	Metabolism	Energy metabolism	2	3	5	118	1	1	ENSMUSG00000019210(Atp6v1e1),ENSMUSG00000020089(Ppa1)	ENSMUSG00000028238(Atp6v0d2),ENSMUSG00000024038(Ndufv3),ENSMUSG00000019302(Atp6v0a1)	http://www.kegg.jp/kegg-bin/show_pathway?map00190/K03944%09%23FFFFFF,green/K02150%09%23FFFFFF,red/K01507%09%23FFFFFF,red/K02146%09%23FFFFFF,green/K02154%09%23FFFFFF,green/
mmu03010	Ribosome	Genetic Information Processing	Translation	3	3	6	130	1	1	ENSMUSG00000015672(Mrpl32),ENSMUSG00000032215(Rsl24d1),ENSMUSG00000032563(Mrpl3)	ENSMUSG00000039680(Mrps6),ENSMUSG00000023939(Mrpl14),ENSMUSG00000002767(Mrpl2)	http://www.kegg.jp/kegg-bin/show_pathway?map03010/K02896%09%23FFFFFF,red/K02911%09%23FFFFFF,red/K02990%09%23FFFFFF,green/K02906%09%23FFFFFF,red/K02886%09%23FFFFFF,green/K02874%09%23FFFFFF,green/
mmu04740	Olfactory transduction	Organismal Systems	Sensory system	10	9	19	1142	1	1	ENSMUSG00000040328(Olfr56),ENSMUSG00000045514(Olfr460),ENSMUSG00000053819(Camk2d),ENSMUSG00000047511(Olfr1396),ENSMUSG00000001175(Calm1),ENSMUSG00000045381(Olfr433),ENSMUSG00000029064(Gnb1),ENSMUSG00000030653(Gm45837),ENSMUSG00000042249(Grk3),ENSMUSG00000061972(Olfr99)	ENSMUSG00000054640(Slc8a1),ENSMUSG00000021820(Camk2g),ENSMUSG00000020654(Adcy3),ENSMUSG00000026360(Rgs2),ENSMUSG00000048240(Gng7),ENSMUSG00000005469(Prkaca),ENSMUSG00000090675(Olfr111),ENSMUSG00000004347(Pde1c),ENSMUSG00000018909(Arrb1)	http://www.kegg.jp/kegg-bin/show_pathway?map04740/K04439%09%23FFFFFF,green/K08043%09%23FFFFFF,green/K00910%09%23FFFFFF,red/K04543%09%23FFFFFF,green/K04257%09%23FFFFFF,purple/K13755%09%23FFFFFF,green/K04515%09%23FFFFFF,purple/K04536%09%23FFFFFF,red/K18283%09%23FFFFFF,red/K18154%09%23FFFFFF,green/K04345%09%23FFFFFF,green/K02183%09%23FFFFFF,red/K05849%09%23FFFFFF,green/
