# Supplementary material for: Transcriptomics and quantitative proteomics reveal changes after second stimulation of bone marrow-derived macrophages from lupus-prone MRL/lpr mice
Source: Front Immunol. 2022 Oct 19;13:1004232. doi: 10.3389/fimmu.2022.1004232 (PMC9627492; doi:10.3389/fimmu.2022.1004232)
Supplement: Supplementary file 10 [file Table_10.xlsx]

## Sheet: Sheet1
Category	GO.ID	Term	Up	Down	DEG	Total	Pvalue	FDR	Up_Gene	Down_Gene
BP	GO:0035458	cellular response to interferon-beta	31	0	31	46	1.54185e-43	9.20024e-40	ENSMUSG00000020464(Pnpt1),ENSMUSG00000026535(Ifi202b),ENSMUSG00000026536(Ifi211),ENSMUSG00000028268(Gbp3),ENSMUSG00000028270(Gbp2),ENSMUSG00000031639(Tlr3),ENSMUSG00000034459(Ifit1),ENSMUSG00000037860(Aim2),ENSMUSG00000039997(Ifi203),ENSMUSG00000043263(Ifi209),ENSMUSG00000046879(Irgm1),ENSMUSG00000048806(Ifnb1),ENSMUSG00000048852(Gm12185),ENSMUSG00000054072(Iigp1),ENSMUSG00000054203(Ifi205),ENSMU…	-
BP	GO:0035456	response to interferon-beta	32	0	32	58	9.37104e-41	2.79585e-37	ENSMUSG00000020464(Pnpt1),ENSMUSG00000025492(Ifitm3),ENSMUSG00000026535(Ifi202b),ENSMUSG00000026536(Ifi211),ENSMUSG00000028268(Gbp3),ENSMUSG00000028270(Gbp2),ENSMUSG00000031639(Tlr3),ENSMUSG00000034459(Ifit1),ENSMUSG00000037860(Aim2),ENSMUSG00000039997(Ifi203),ENSMUSG00000043263(Ifi209),ENSMUSG00000046879(Irgm1),ENSMUSG00000048806(Ifnb1),ENSMUSG00000048852(Gm12185),ENSMUSG00000054072(Iigp1),ENSMU…	-
BP	GO:0051707	response to other organism	101	4	105	1390	1.96394e-37	3.55359e-34	ENSMUSG00000000204(Slfn4),ENSMUSG00000001128(Cfp),ENSMUSG00000002227(Mov10),ENSMUSG00000009185(Ccl8),ENSMUSG00000010358(Ifi35),ENSMUSG00000012519(Mlkl),ENSMUSG00000015316(Slamf1),ENSMUSG00000015947(Fcgr1),ENSMUSG00000017830(Dhx58),ENSMUSG00000020638(Cmpk2),ENSMUSG00000020641(Rsad2),ENSMUSG00000021367(Edn1),ENSMUSG00000021423(Ly86),ENSMUSG00000022901(Cd86),ENSMUSG00000024079(Eif2ak2),ENSMUSG000000…	ENSMUSG00000000983(Wfdc18),ENSMUSG00000026883(Dab2ip),ENSMUSG00000036867(Smad6),ENSMUSG00000056501(Cebpb)
BP	GO:0043207	response to external biotic stimulus	101	4	105	1393	2.38216e-37	3.55359e-34	ENSMUSG00000000204(Slfn4),ENSMUSG00000001128(Cfp),ENSMUSG00000002227(Mov10),ENSMUSG00000009185(Ccl8),ENSMUSG00000010358(Ifi35),ENSMUSG00000012519(Mlkl),ENSMUSG00000015316(Slamf1),ENSMUSG00000015947(Fcgr1),ENSMUSG00000017830(Dhx58),ENSMUSG00000020638(Cmpk2),ENSMUSG00000020641(Rsad2),ENSMUSG00000021367(Edn1),ENSMUSG00000021423(Ly86),ENSMUSG00000022901(Cd86),ENSMUSG00000024079(Eif2ak2),ENSMUSG000000…	ENSMUSG00000000983(Wfdc18),ENSMUSG00000026883(Dab2ip),ENSMUSG00000036867(Smad6),ENSMUSG00000056501(Cebpb)
BP	GO:0002376	immune system process	130	9	139	2438	5.15433e-37	6.15117e-34	ENSMUSG00000001128(Cfp),ENSMUSG00000002227(Mov10),ENSMUSG00000004040(Stat3),ENSMUSG00000006310(Zbtb32),ENSMUSG00000009185(Ccl8),ENSMUSG00000010358(Ifi35),ENSMUSG00000012519(Mlkl),ENSMUSG00000014361(Mertk),ENSMUSG00000014773(Dll1),ENSMUSG00000015316(Slamf1),ENSMUSG00000015947(Fcgr1),ENSMUSG00000017830(Dhx58),ENSMUSG00000018925(Heatr9),ENSMUSG00000020641(Rsad2),ENSMUSG00000020717(Pecam1),ENSMUSG000…	ENSMUSG00000000983(Wfdc18),ENSMUSG00000023915(Tnfrsf21),ENSMUSG00000026883(Dab2ip),ENSMUSG00000028539(Artn),ENSMUSG00000034957(Cebpa),ENSMUSG00000036867(Smad6),ENSMUSG00000038065(Mturn),ENSMUSG00000046006(Gapt),ENSMUSG00000056501(Cebpb)
BP	GO:0009607	response to biotic stimulus	101	4	105	1425	1.8076e-36	1.79765e-33	ENSMUSG00000000204(Slfn4),ENSMUSG00000001128(Cfp),ENSMUSG00000002227(Mov10),ENSMUSG00000009185(Ccl8),ENSMUSG00000010358(Ifi35),ENSMUSG00000012519(Mlkl),ENSMUSG00000015316(Slamf1),ENSMUSG00000015947(Fcgr1),ENSMUSG00000017830(Dhx58),ENSMUSG00000020638(Cmpk2),ENSMUSG00000020641(Rsad2),ENSMUSG00000021367(Edn1),ENSMUSG00000021423(Ly86),ENSMUSG00000022901(Cd86),ENSMUSG00000024079(Eif2ak2),ENSMUSG000000…	ENSMUSG00000000983(Wfdc18),ENSMUSG00000026883(Dab2ip),ENSMUSG00000036867(Smad6),ENSMUSG00000056501(Cebpb)
BP	GO:0098542	defense response to other organism	85	3	88	1009	9.99293e-36	8.51826e-33	ENSMUSG00000001128(Cfp),ENSMUSG00000002227(Mov10),ENSMUSG00000009185(Ccl8),ENSMUSG00000010358(Ifi35),ENSMUSG00000012519(Mlkl),ENSMUSG00000015316(Slamf1),ENSMUSG00000015947(Fcgr1),ENSMUSG00000017830(Dhx58),ENSMUSG00000020641(Rsad2),ENSMUSG00000021367(Edn1),ENSMUSG00000021423(Ly86),ENSMUSG00000022901(Cd86),ENSMUSG00000024079(Eif2ak2),ENSMUSG00000024397(Aif1),ENSMUSG00000024610(Cd74),ENSMUSG00000025…	ENSMUSG00000000983(Wfdc18),ENSMUSG00000026883(Dab2ip),ENSMUSG00000056501(Cebpb)
BP	GO:0006952	defense response	103	5	108	1541	1.25693e-35	9.37515e-33	ENSMUSG00000001128(Cfp),ENSMUSG00000002227(Mov10),ENSMUSG00000004040(Stat3),ENSMUSG00000009185(Ccl8),ENSMUSG00000010358(Ifi35),ENSMUSG00000012519(Mlkl),ENSMUSG00000015316(Slamf1),ENSMUSG00000015947(Fcgr1),ENSMUSG00000017830(Dhx58),ENSMUSG00000020641(Rsad2),ENSMUSG00000021367(Edn1),ENSMUSG00000021423(Ly86),ENSMUSG00000022901(Cd86),ENSMUSG00000024079(Eif2ak2),ENSMUSG00000024397(Aif1),ENSMUSG0000002…	ENSMUSG00000000983(Wfdc18),ENSMUSG00000026883(Dab2ip),ENSMUSG00000031671(Setd6),ENSMUSG00000034957(Cebpa),ENSMUSG00000056501(Cebpb)
BP	GO:0006955	immune response	97	5	102	1417	1.80564e-34	1.19714e-31	ENSMUSG00000001128(Cfp),ENSMUSG00000004040(Stat3),ENSMUSG00000009185(Ccl8),ENSMUSG00000010358(Ifi35),ENSMUSG00000014773(Dll1),ENSMUSG00000015316(Slamf1),ENSMUSG00000015947(Fcgr1),ENSMUSG00000017830(Dhx58),ENSMUSG00000020641(Rsad2),ENSMUSG00000021367(Edn1),ENSMUSG00000021423(Ly86),ENSMUSG00000022876(Samsn1),ENSMUSG00000022901(Cd86),ENSMUSG00000024079(Eif2ak2),ENSMUSG00000024397(Aif1),ENSMUSG000000…	ENSMUSG00000000983(Wfdc18),ENSMUSG00000023915(Tnfrsf21),ENSMUSG00000026883(Dab2ip),ENSMUSG00000036867(Smad6),ENSMUSG00000046006(Gapt)
BP	GO:0044419	interspecies interaction between organisms	103	4	107	1602	2.06365e-33	1.23138e-30	ENSMUSG00000000204(Slfn4),ENSMUSG00000001128(Cfp),ENSMUSG00000002227(Mov10),ENSMUSG00000006411(Nectin4),ENSMUSG00000009185(Ccl8),ENSMUSG00000010358(Ifi35),ENSMUSG00000012519(Mlkl),ENSMUSG00000015316(Slamf1),ENSMUSG00000015947(Fcgr1),ENSMUSG00000017830(Dhx58),ENSMUSG00000020638(Cmpk2),ENSMUSG00000020641(Rsad2),ENSMUSG00000021367(Edn1),ENSMUSG00000021423(Ly86),ENSMUSG00000022901(Cd86),ENSMUSG000000…	ENSMUSG00000000983(Wfdc18),ENSMUSG00000026883(Dab2ip),ENSMUSG00000036867(Smad6),ENSMUSG00000056501(Cebpb)
BP	GO:0045087	innate immune response	71	2	73	737	5.21391e-33	2.82831e-30	ENSMUSG00000001128(Cfp),ENSMUSG00000009185(Ccl8),ENSMUSG00000010358(Ifi35),ENSMUSG00000015316(Slamf1),ENSMUSG00000015947(Fcgr1),ENSMUSG00000017830(Dhx58),ENSMUSG00000020641(Rsad2),ENSMUSG00000021367(Edn1),ENSMUSG00000021423(Ly86),ENSMUSG00000024079(Eif2ak2),ENSMUSG00000024397(Aif1),ENSMUSG00000024610(Cd74),ENSMUSG00000025058(Tasl),ENSMUSG00000025492(Ifitm3),ENSMUSG00000025498(Irf7),ENSMUSG0000002…	ENSMUSG00000000983(Wfdc18),ENSMUSG00000026883(Dab2ip)
BP	GO:0034097	response to cytokine	71	7	78	919	1.04372e-30	5.18989e-28	ENSMUSG00000004040(Stat3),ENSMUSG00000009185(Ccl8),ENSMUSG00000020464(Pnpt1),ENSMUSG00000021127(Zfp36l1),ENSMUSG00000021367(Edn1),ENSMUSG00000023206(Il15ra),ENSMUSG00000024079(Eif2ak2),ENSMUSG00000024397(Aif1),ENSMUSG00000024610(Cd74),ENSMUSG00000024887(Asah2),ENSMUSG00000025492(Ifitm3),ENSMUSG00000025498(Irf7),ENSMUSG00000026535(Ifi202b),ENSMUSG00000026536(Ifi211),ENSMUSG00000026770(Il2ra),ENSMU…	ENSMUSG00000006442(Srm),ENSMUSG00000022474(Pmm1),ENSMUSG00000023915(Tnfrsf21),ENSMUSG00000026883(Dab2ip),ENSMUSG00000032456(Nmnat3),ENSMUSG00000034957(Cebpa),ENSMUSG00000056501(Cebpb)
BP	GO:0071345	cellular response to cytokine stimulus	65	6	71	806	6.96424e-29	3.19658e-26	ENSMUSG00000004040(Stat3),ENSMUSG00000009185(Ccl8),ENSMUSG00000020464(Pnpt1),ENSMUSG00000021127(Zfp36l1),ENSMUSG00000021367(Edn1),ENSMUSG00000023206(Il15ra),ENSMUSG00000024397(Aif1),ENSMUSG00000024610(Cd74),ENSMUSG00000024887(Asah2),ENSMUSG00000025492(Ifitm3),ENSMUSG00000025498(Irf7),ENSMUSG00000026535(Ifi202b),ENSMUSG00000026536(Ifi211),ENSMUSG00000026770(Il2ra),ENSMUSG00000026981(Il1rn),ENSMUSG…	ENSMUSG00000006442(Srm),ENSMUSG00000022474(Pmm1),ENSMUSG00000023915(Tnfrsf21),ENSMUSG00000026883(Dab2ip),ENSMUSG00000034957(Cebpa),ENSMUSG00000056501(Cebpb)
BP	GO:0009615	response to virus	44	0	44	322	1.16748e-25	4.97598e-23	ENSMUSG00000002227(Mov10),ENSMUSG00000012519(Mlkl),ENSMUSG00000017830(Dhx58),ENSMUSG00000020641(Rsad2),ENSMUSG00000022901(Cd86),ENSMUSG00000024079(Eif2ak2),ENSMUSG00000025492(Ifitm3),ENSMUSG00000025498(Irf7),ENSMUSG00000026770(Il2ra),ENSMUSG00000026896(Ifih1),ENSMUSG00000027514(Zbp1),ENSMUSG00000027639(Samhd1),ENSMUSG00000029417(Cxcl9),ENSMUSG00000029780(Nt5c3),ENSMUSG00000031639(Tlr3),ENSMUSG000…	-
BP	GO:0051607	defense response to virus	39	0	39	253	8.30293e-25	3.3029e-22	ENSMUSG00000002227(Mov10),ENSMUSG00000012519(Mlkl),ENSMUSG00000017830(Dhx58),ENSMUSG00000020641(Rsad2),ENSMUSG00000022901(Cd86),ENSMUSG00000024079(Eif2ak2),ENSMUSG00000025492(Ifitm3),ENSMUSG00000025498(Irf7),ENSMUSG00000026770(Il2ra),ENSMUSG00000026896(Ifih1),ENSMUSG00000027514(Zbp1),ENSMUSG00000027639(Samhd1),ENSMUSG00000029417(Cxcl9),ENSMUSG00000029780(Nt5c3),ENSMUSG00000031639(Tlr3),ENSMUSG000…	-
BP	GO:0009605	response to external stimulus	119	8	127	2758	2.09954e-24	7.82999e-22	ENSMUSG00000000204(Slfn4),ENSMUSG00000000247(Lhx2),ENSMUSG00000001128(Cfp),ENSMUSG00000001552(Jup),ENSMUSG00000002227(Mov10),ENSMUSG00000004040(Stat3),ENSMUSG00000009185(Ccl8),ENSMUSG00000010358(Ifi35),ENSMUSG00000012519(Mlkl),ENSMUSG00000015316(Slamf1),ENSMUSG00000015947(Fcgr1),ENSMUSG00000017830(Dhx58),ENSMUSG00000019979(Apaf1),ENSMUSG00000020638(Cmpk2),ENSMUSG00000020641(Rsad2),ENSMUSG00000021…	ENSMUSG00000000983(Wfdc18),ENSMUSG00000001227(Sema6b),ENSMUSG00000026883(Dab2ip),ENSMUSG00000028539(Artn),ENSMUSG00000031671(Setd6),ENSMUSG00000034957(Cebpa),ENSMUSG00000036867(Smad6),ENSMUSG00000056501(Cebpb)
BP	GO:0002682	regulation of immune system process	77	4	81	1277	2.10843e-23	7.4006e-21	ENSMUSG00000001128(Cfp),ENSMUSG00000004040(Stat3),ENSMUSG00000010358(Ifi35),ENSMUSG00000014361(Mertk),ENSMUSG00000014773(Dll1),ENSMUSG00000015316(Slamf1),ENSMUSG00000015947(Fcgr1),ENSMUSG00000017830(Dhx58),ENSMUSG00000020641(Rsad2),ENSMUSG00000020717(Pecam1),ENSMUSG00000021127(Zfp36l1),ENSMUSG00000021367(Edn1),ENSMUSG00000022876(Samsn1),ENSMUSG00000022901(Cd86),ENSMUSG00000023206(Il15ra),ENSMUSG0…	ENSMUSG00000023915(Tnfrsf21),ENSMUSG00000034957(Cebpa),ENSMUSG00000038065(Mturn),ENSMUSG00000056501(Cebpb)
BP	GO:0006950	response to stress	130	14	144	3676	3.62132e-21	1.20047e-18	ENSMUSG00000001128(Cfp),ENSMUSG00000002227(Mov10),ENSMUSG00000002307(Daxx),ENSMUSG00000004040(Stat3),ENSMUSG00000009185(Ccl8),ENSMUSG00000010358(Ifi35),ENSMUSG00000012519(Mlkl),ENSMUSG00000014361(Mertk),ENSMUSG00000015316(Slamf1),ENSMUSG00000015947(Fcgr1),ENSMUSG00000017830(Dhx58),ENSMUSG00000019979(Apaf1),ENSMUSG00000020415(Pttg1),ENSMUSG00000020464(Pnpt1),ENSMUSG00000020641(Rsad2),ENSMUSG000000…	ENSMUSG00000000983(Wfdc18),ENSMUSG00000016984(Etaa1),ENSMUSG00000020974(Pole2),ENSMUSG00000026883(Dab2ip),ENSMUSG00000028933(Xrcc2),ENSMUSG00000030322(Mbd4),ENSMUSG00000031671(Setd6),ENSMUSG00000032456(Nmnat3),ENSMUSG00000034957(Cebpa),ENSMUSG00000036867(Smad6),ENSMUSG00000038065(Mturn),ENSMUSG00000038644(Pold1),ENSMUSG00000052934(Fbxo31),ENSMUSG00000056501(Cebpb)
BP	GO:0002252	immune effector process	56	1	57	718	5.61439e-21	1.76321e-18	ENSMUSG00000001128(Cfp),ENSMUSG00000002227(Mov10),ENSMUSG00000004040(Stat3),ENSMUSG00000010358(Ifi35),ENSMUSG00000012519(Mlkl),ENSMUSG00000014773(Dll1),ENSMUSG00000015316(Slamf1),ENSMUSG00000015947(Fcgr1),ENSMUSG00000017830(Dhx58),ENSMUSG00000020641(Rsad2),ENSMUSG00000022901(Cd86),ENSMUSG00000024079(Eif2ak2),ENSMUSG00000024610(Cd74),ENSMUSG00000025492(Ifitm3),ENSMUSG00000025498(Irf7),ENSMUSG00000…	ENSMUSG00000046006(Gapt)
BP	GO:0009617	response to bacterium	53	4	57	740	2.3719e-20	7.07655e-18	ENSMUSG00000000204(Slfn4),ENSMUSG00000015947(Fcgr1),ENSMUSG00000017830(Dhx58),ENSMUSG00000020638(Cmpk2),ENSMUSG00000021367(Edn1),ENSMUSG00000021423(Ly86),ENSMUSG00000022901(Cd86),ENSMUSG00000024079(Eif2ak2),ENSMUSG00000026358(Rgs1),ENSMUSG00000026535(Ifi202b),ENSMUSG00000026536(Ifi211),ENSMUSG00000028037(Ifi44),ENSMUSG00000028268(Gbp3),ENSMUSG00000028270(Gbp2),ENSMUSG00000029298(Gbp9),ENSMUSG0000…	ENSMUSG00000000983(Wfdc18),ENSMUSG00000026883(Dab2ip),ENSMUSG00000036867(Smad6),ENSMUSG00000056501(Cebpb)
BP	GO:0071310	cellular response to organic substance	96	10	106	2413	1.98534e-18	5.6412e-16	ENSMUSG00000001552(Jup),ENSMUSG00000002307(Daxx),ENSMUSG00000004040(Stat3),ENSMUSG00000004698(Hdac9),ENSMUSG00000009185(Ccl8),ENSMUSG00000014773(Dll1),ENSMUSG00000015222(Map2),ENSMUSG00000019979(Apaf1),ENSMUSG00000020464(Pnpt1),ENSMUSG00000020638(Cmpk2),ENSMUSG00000021127(Zfp36l1),ENSMUSG00000021367(Edn1),ENSMUSG00000021423(Ly86),ENSMUSG00000022684(Bfar),ENSMUSG00000022901(Cd86),ENSMUSG0000002320…	ENSMUSG00000006442(Srm),ENSMUSG00000022474(Pmm1),ENSMUSG00000023915(Tnfrsf21),ENSMUSG00000025931(Paqr8),ENSMUSG00000026883(Dab2ip),ENSMUSG00000033863(Klf9),ENSMUSG00000034957(Cebpa),ENSMUSG00000036867(Smad6),ENSMUSG00000042745(Id1),ENSMUSG00000056501(Cebpb)
BP	GO:0002831	regulation of response to biotic stimulus	34	0	34	294	9.989e-18	2.70929e-15	ENSMUSG00000010358(Ifi35),ENSMUSG00000017830(Dhx58),ENSMUSG00000021423(Ly86),ENSMUSG00000024610(Cd74),ENSMUSG00000025058(Tasl),ENSMUSG00000025498(Irf7),ENSMUSG00000026535(Ifi202b),ENSMUSG00000026536(Ifi211),ENSMUSG00000026770(Il2ra),ENSMUSG00000027514(Zbp1),ENSMUSG00000027639(Samhd1),ENSMUSG00000030149(Klrk1),ENSMUSG00000031712(Il15),ENSMUSG00000036986(Pml),ENSMUSG00000037321(Tap1),ENSMUSG0000003…	-
BP	GO:0002684	positive regulation of immune system process	54	3	57	848	1.3382e-17	3.47176e-15	ENSMUSG00000001128(Cfp),ENSMUSG00000004040(Stat3),ENSMUSG00000010358(Ifi35),ENSMUSG00000015316(Slamf1),ENSMUSG00000015947(Fcgr1),ENSMUSG00000017830(Dhx58),ENSMUSG00000020641(Rsad2),ENSMUSG00000020717(Pecam1),ENSMUSG00000021127(Zfp36l1),ENSMUSG00000021367(Edn1),ENSMUSG00000022901(Cd86),ENSMUSG00000023206(Il15ra),ENSMUSG00000024397(Aif1),ENSMUSG00000024610(Cd74),ENSMUSG00000025058(Tasl),ENSMUSG0000…	ENSMUSG00000023915(Tnfrsf21),ENSMUSG00000034957(Cebpa),ENSMUSG00000038065(Mturn)
BP	GO:0032103	positive regulation of response to external stimulus	36	3	39	409	3.00897e-17	7.48105e-15	ENSMUSG00000004040(Stat3),ENSMUSG00000010358(Ifi35),ENSMUSG00000015316(Slamf1),ENSMUSG00000015947(Fcgr1),ENSMUSG00000017830(Dhx58),ENSMUSG00000021367(Edn1),ENSMUSG00000021423(Ly86),ENSMUSG00000024397(Aif1),ENSMUSG00000024610(Cd74),ENSMUSG00000025058(Tasl),ENSMUSG00000025498(Irf7),ENSMUSG00000026535(Ifi202b),ENSMUSG00000026536(Ifi211),ENSMUSG00000026581(Sell),ENSMUSG00000027514(Zbp1),ENSMUSG000000…	ENSMUSG00000028539(Artn),ENSMUSG00000034957(Cebpa),ENSMUSG00000056501(Cebpb)
BP	GO:0032101	regulation of response to external stimulus	52	5	57	899	1.85003e-16	4.41565e-14	ENSMUSG00000004040(Stat3),ENSMUSG00000010358(Ifi35),ENSMUSG00000015316(Slamf1),ENSMUSG00000015947(Fcgr1),ENSMUSG00000017830(Dhx58),ENSMUSG00000021367(Edn1),ENSMUSG00000021423(Ly86),ENSMUSG00000023961(Enpp4),ENSMUSG00000024397(Aif1),ENSMUSG00000024610(Cd74),ENSMUSG00000025058(Tasl),ENSMUSG00000025498(Irf7),ENSMUSG00000026121(Sema4c),ENSMUSG00000026535(Ifi202b),ENSMUSG00000026536(Ifi211),ENSMUSG000…	ENSMUSG00000001227(Sema6b),ENSMUSG00000028539(Artn),ENSMUSG00000031671(Setd6),ENSMUSG00000034957(Cebpa),ENSMUSG00000056501(Cebpb)
BP	GO:0031347	regulation of defense response	41	3	44	572	7.72621e-16	1.77316e-13	ENSMUSG00000004040(Stat3),ENSMUSG00000010358(Ifi35),ENSMUSG00000015947(Fcgr1),ENSMUSG00000017830(Dhx58),ENSMUSG00000024610(Cd74),ENSMUSG00000025058(Tasl),ENSMUSG00000025498(Irf7),ENSMUSG00000026535(Ifi202b),ENSMUSG00000026536(Ifi211),ENSMUSG00000026770(Il2ra),ENSMUSG00000027514(Zbp1),ENSMUSG00000027639(Samhd1),ENSMUSG00000030107(Usp18),ENSMUSG00000030149(Klrk1),ENSMUSG00000030560(Ctsc),ENSMUSG000…	ENSMUSG00000031671(Setd6),ENSMUSG00000034957(Cebpa),ENSMUSG00000056501(Cebpb)
BP	GO:0002833	positive regulation of response to biotic stimulus	24	0	24	159	1.76e-15	3.88959e-13	ENSMUSG00000010358(Ifi35),ENSMUSG00000017830(Dhx58),ENSMUSG00000021423(Ly86),ENSMUSG00000024610(Cd74),ENSMUSG00000025058(Tasl),ENSMUSG00000025498(Irf7),ENSMUSG00000026535(Ifi202b),ENSMUSG00000026536(Ifi211),ENSMUSG00000027514(Zbp1),ENSMUSG00000030149(Klrk1),ENSMUSG00000037860(Aim2),ENSMUSG00000037921(Ddx60),ENSMUSG00000038058(Nod1),ENSMUSG00000039997(Ifi203),ENSMUSG00000043263(Ifi209),ENSMUSG0000…	-
BP	GO:0031349	positive regulation of defense response	28	2	30	269	2.43012e-15	5.17876e-13	ENSMUSG00000004040(Stat3),ENSMUSG00000010358(Ifi35),ENSMUSG00000015947(Fcgr1),ENSMUSG00000017830(Dhx58),ENSMUSG00000024610(Cd74),ENSMUSG00000025058(Tasl),ENSMUSG00000025498(Irf7),ENSMUSG00000026535(Ifi202b),ENSMUSG00000026536(Ifi211),ENSMUSG00000027514(Zbp1),ENSMUSG00000030149(Klrk1),ENSMUSG00000030560(Ctsc),ENSMUSG00000031639(Tlr3),ENSMUSG00000037860(Aim2),ENSMUSG00000037921(Ddx60),ENSMUSG000000…	ENSMUSG00000034957(Cebpa),ENSMUSG00000056501(Cebpb)
BP	GO:0050776	regulation of immune response	45	1	46	655	4.91756e-15	1.01183e-12	ENSMUSG00000001128(Cfp),ENSMUSG00000010358(Ifi35),ENSMUSG00000015316(Slamf1),ENSMUSG00000015947(Fcgr1),ENSMUSG00000017830(Dhx58),ENSMUSG00000020641(Rsad2),ENSMUSG00000022876(Samsn1),ENSMUSG00000024610(Cd74),ENSMUSG00000025058(Tasl),ENSMUSG00000025498(Irf7),ENSMUSG00000026535(Ifi202b),ENSMUSG00000026536(Ifi211),ENSMUSG00000026770(Il2ra),ENSMUSG00000027514(Zbp1),ENSMUSG00000027639(Samhd1),ENSMUSG00…	ENSMUSG00000023915(Tnfrsf21)
BP	GO:0034341	response to interferon-gamma	22	0	22	145	2.41339e-14	4.80024e-12	ENSMUSG00000009185(Ccl8),ENSMUSG00000021367(Edn1),ENSMUSG00000024397(Aif1),ENSMUSG00000024610(Cd74),ENSMUSG00000025492(Ifitm3),ENSMUSG00000028268(Gbp3),ENSMUSG00000028270(Gbp2),ENSMUSG00000029298(Gbp9),ENSMUSG00000031639(Tlr3),ENSMUSG00000035352(Ccl12),ENSMUSG00000036594(H2-Aa),ENSMUSG00000040253(Gbp7),ENSMUSG00000041515(Irf8),ENSMUSG00000046879(Irgm1),ENSMUSG00000069874(Irgm2),ENSMUSG00000073421…	-
BP	GO:0070887	cellular response to chemical stimulus	102	10	112	3046	6.35248e-14	1.22275e-11	ENSMUSG00000001552(Jup),ENSMUSG00000002307(Daxx),ENSMUSG00000004040(Stat3),ENSMUSG00000004698(Hdac9),ENSMUSG00000009185(Ccl8),ENSMUSG00000014773(Dll1),ENSMUSG00000015222(Map2),ENSMUSG00000015316(Slamf1),ENSMUSG00000019979(Apaf1),ENSMUSG00000020464(Pnpt1),ENSMUSG00000020638(Cmpk2),ENSMUSG00000021127(Zfp36l1),ENSMUSG00000021367(Edn1),ENSMUSG00000021423(Ly86),ENSMUSG00000022684(Bfar),ENSMUSG00000022…	ENSMUSG00000006442(Srm),ENSMUSG00000022474(Pmm1),ENSMUSG00000023915(Tnfrsf21),ENSMUSG00000025931(Paqr8),ENSMUSG00000026883(Dab2ip),ENSMUSG00000033863(Klf9),ENSMUSG00000034957(Cebpa),ENSMUSG00000036867(Smad6),ENSMUSG00000042745(Id1),ENSMUSG00000056501(Cebpb)
BP	GO:0010033	response to organic substance	105	13	118	3345	1.86248e-13	3.47295e-11	ENSMUSG00000001552(Jup),ENSMUSG00000002307(Daxx),ENSMUSG00000004040(Stat3),ENSMUSG00000004698(Hdac9),ENSMUSG00000009185(Ccl8),ENSMUSG00000014773(Dll1),ENSMUSG00000015222(Map2),ENSMUSG00000019979(Apaf1),ENSMUSG00000020464(Pnpt1),ENSMUSG00000020638(Cmpk2),ENSMUSG00000021127(Zfp36l1),ENSMUSG00000021367(Edn1),ENSMUSG00000021423(Ly86),ENSMUSG00000022684(Bfar),ENSMUSG00000022901(Cd86),ENSMUSG0000002320…	ENSMUSG00000006442(Srm),ENSMUSG00000022474(Pmm1),ENSMUSG00000023915(Tnfrsf21),ENSMUSG00000025931(Paqr8),ENSMUSG00000026409(Pfkfb2),ENSMUSG00000026883(Dab2ip),ENSMUSG00000030322(Mbd4),ENSMUSG00000032456(Nmnat3),ENSMUSG00000033863(Klf9),ENSMUSG00000034957(Cebpa),ENSMUSG00000036867(Smad6),ENSMUSG00000042745(Id1),ENSMUSG00000056501(Cebpb)
BP	GO:0045089	positive regulation of innate immune response	19	0	19	114	2.53235e-13	4.57894e-11	ENSMUSG00000010358(Ifi35),ENSMUSG00000024610(Cd74),ENSMUSG00000025058(Tasl),ENSMUSG00000025498(Irf7),ENSMUSG00000026535(Ifi202b),ENSMUSG00000026536(Ifi211),ENSMUSG00000027514(Zbp1),ENSMUSG00000030149(Klrk1),ENSMUSG00000037860(Aim2),ENSMUSG00000039997(Ifi203),ENSMUSG00000043263(Ifi209),ENSMUSG00000045322(Tlr9),ENSMUSG00000046879(Irgm1),ENSMUSG00000054203(Ifi205),ENSMUSG00000066677(Ifi208),ENSMUSG0…	-
BP	GO:0045088	regulation of innate immune response	22	0	22	179	1.96745e-12	3.45287e-10	ENSMUSG00000010358(Ifi35),ENSMUSG00000017830(Dhx58),ENSMUSG00000024610(Cd74),ENSMUSG00000025058(Tasl),ENSMUSG00000025498(Irf7),ENSMUSG00000026535(Ifi202b),ENSMUSG00000026536(Ifi211),ENSMUSG00000027514(Zbp1),ENSMUSG00000027639(Samhd1),ENSMUSG00000030149(Klrk1),ENSMUSG00000037321(Tap1),ENSMUSG00000037860(Aim2),ENSMUSG00000039997(Ifi203),ENSMUSG00000043263(Ifi209),ENSMUSG00000045322(Tlr9),ENSMUSG000…	-
BP	GO:0050896	response to stimulus	207	35	242	9581	2.2167e-12	3.77915e-10	ENSMUSG00000000184(Ccnd2),ENSMUSG00000000204(Slfn4),ENSMUSG00000000247(Lhx2),ENSMUSG00000001128(Cfp),ENSMUSG00000001552(Jup),ENSMUSG00000001768(Rin2),ENSMUSG00000002227(Mov10),ENSMUSG00000002307(Daxx),ENSMUSG00000003617(Cp),ENSMUSG00000004040(Stat3),ENSMUSG00000004698(Hdac9),ENSMUSG00000009185(Ccl8),ENSMUSG00000010358(Ifi35),ENSMUSG00000012519(Mlkl),ENSMUSG00000014361(Mertk),ENSMUSG00000014773(Dl…	ENSMUSG00000000983(Wfdc18),ENSMUSG00000001227(Sema6b),ENSMUSG00000006442(Srm),ENSMUSG00000006641(Slc5a6),ENSMUSG00000016984(Etaa1),ENSMUSG00000020974(Pole2),ENSMUSG00000022474(Pmm1),ENSMUSG00000022494(Shisa9),ENSMUSG00000023915(Tnfrsf21),ENSMUSG00000024186(Rgs11),ENSMUSG00000025764(Jade1),ENSMUSG00000025931(Paqr8),ENSMUSG00000026409(Pfkfb2),ENSMUSG00000026785(Pkn3),ENSMUSG00000026883(Dab2ip),ENSM…
BP	GO:0080134	regulation of response to stress	56	6	62	1305	3.84184e-12	6.36784e-10	ENSMUSG00000004040(Stat3),ENSMUSG00000010358(Ifi35),ENSMUSG00000012519(Mlkl),ENSMUSG00000015316(Slamf1),ENSMUSG00000015947(Fcgr1),ENSMUSG00000017830(Dhx58),ENSMUSG00000020464(Pnpt1),ENSMUSG00000021367(Edn1),ENSMUSG00000022684(Bfar),ENSMUSG00000023961(Enpp4),ENSMUSG00000024079(Eif2ak2),ENSMUSG00000024610(Cd74),ENSMUSG00000025058(Tasl),ENSMUSG00000025498(Irf7),ENSMUSG00000026121(Sema4c),ENSMUSG0000…	ENSMUSG00000016984(Etaa1),ENSMUSG00000026883(Dab2ip),ENSMUSG00000031671(Setd6),ENSMUSG00000034957(Cebpa),ENSMUSG00000038065(Mturn),ENSMUSG00000056501(Cebpb)
BP	GO:0042832	defense response to protozoan	11	0	11	32	6.05334e-12	9.76224e-10	ENSMUSG00000028268(Gbp3),ENSMUSG00000028270(Gbp2),ENSMUSG00000029298(Gbp9),ENSMUSG00000039699(Batf2),ENSMUSG00000040253(Gbp7),ENSMUSG00000041515(Irf8),ENSMUSG00000054072(Iigp1),ENSMUSG00000069874(Irgm2),ENSMUSG00000079363(Gbp4),ENSMUSG00000104713(Gbp6),ENSMUSG00000105096(Gbp10)	-
BP	GO:0001562	response to protozoan	11	0	11	34	1.29897e-11	2.03973e-09	ENSMUSG00000028268(Gbp3),ENSMUSG00000028270(Gbp2),ENSMUSG00000029298(Gbp9),ENSMUSG00000039699(Batf2),ENSMUSG00000040253(Gbp7),ENSMUSG00000041515(Irf8),ENSMUSG00000054072(Iigp1),ENSMUSG00000069874(Irgm2),ENSMUSG00000079363(Gbp4),ENSMUSG00000104713(Gbp6),ENSMUSG00000105096(Gbp10)	-
BP	GO:0002218	activation of innate immune response	12	0	12	45	1.96413e-11	3.00511e-09	ENSMUSG00000026535(Ifi202b),ENSMUSG00000026536(Ifi211),ENSMUSG00000027514(Zbp1),ENSMUSG00000030149(Klrk1),ENSMUSG00000037860(Aim2),ENSMUSG00000039997(Ifi203),ENSMUSG00000043263(Ifi209),ENSMUSG00000045322(Tlr9),ENSMUSG00000054203(Ifi205),ENSMUSG00000066677(Ifi208),ENSMUSG00000070501(Ifi214),ENSMUSG00000073489(Ifi204)	-
MF	GO:0003924	GTPase activity	25	1	26	295	2.66454e-11	3.97483e-09	ENSMUSG00000027669(Gnb4),ENSMUSG00000028268(Gbp3),ENSMUSG00000028270(Gbp2),ENSMUSG00000029204(Rhoh),ENSMUSG00000029298(Gbp9),ENSMUSG00000040253(Gbp7),ENSMUSG00000040264(Gbp2b),ENSMUSG00000046879(Irgm1),ENSMUSG00000047446(Arl4a),ENSMUSG00000048852(Gm12185),ENSMUSG00000054072(Iigp1),ENSMUSG00000058163(Gm5431),ENSMUSG00000068606(Gm4841),ENSMUSG00000069874(Irgm2),ENSMUSG00000069892(9930111J21Rik2),EN…	ENSMUSG00000022621(Rabl2)
MF	GO:0001882	nucleoside binding	29	1	30	400	4.39252e-11	6.39272e-09	ENSMUSG00000027293(Ehd4),ENSMUSG00000027639(Samhd1),ENSMUSG00000028268(Gbp3),ENSMUSG00000028270(Gbp2),ENSMUSG00000029204(Rhoh),ENSMUSG00000029298(Gbp9),ENSMUSG00000029366(Dck),ENSMUSG00000040253(Gbp7),ENSMUSG00000040264(Gbp2b),ENSMUSG00000045868(Gvin1),ENSMUSG00000046879(Irgm1),ENSMUSG00000047446(Arl4a),ENSMUSG00000048852(Gm12185),ENSMUSG00000054072(Iigp1),ENSMUSG00000058163(Gm5431),ENSMUSG000000…	ENSMUSG00000022621(Rabl2)
BP	GO:0048583	regulation of response to stimulus	106	15	121	3778	6.32988e-11	8.99296e-09	ENSMUSG00000001128(Cfp),ENSMUSG00000004040(Stat3),ENSMUSG00000009185(Ccl8),ENSMUSG00000010358(Ifi35),ENSMUSG00000012519(Mlkl),ENSMUSG00000014773(Dll1),ENSMUSG00000015316(Slamf1),ENSMUSG00000015947(Fcgr1),ENSMUSG00000016524(Il19),ENSMUSG00000017830(Dhx58),ENSMUSG00000019979(Apaf1),ENSMUSG00000020464(Pnpt1),ENSMUSG00000020641(Rsad2),ENSMUSG00000020717(Pecam1),ENSMUSG00000021367(Edn1),ENSMUSG0000002…	ENSMUSG00000001227(Sema6b),ENSMUSG00000016984(Etaa1),ENSMUSG00000022494(Shisa9),ENSMUSG00000023915(Tnfrsf21),ENSMUSG00000024186(Rgs11),ENSMUSG00000025764(Jade1),ENSMUSG00000026883(Dab2ip),ENSMUSG00000028539(Artn),ENSMUSG00000031671(Setd6),ENSMUSG00000034758(Tle6),ENSMUSG00000034957(Cebpa),ENSMUSG00000036867(Smad6),ENSMUSG00000038065(Mturn),ENSMUSG00000042745(Id1),ENSMUSG00000056501(Cebpb)
BP	GO:0071346	cellular response to interferon-gamma	17	0	17	120	6.83803e-11	9.48895e-09	ENSMUSG00000009185(Ccl8),ENSMUSG00000021367(Edn1),ENSMUSG00000024397(Aif1),ENSMUSG00000028268(Gbp3),ENSMUSG00000028270(Gbp2),ENSMUSG00000029298(Gbp9),ENSMUSG00000031639(Tlr3),ENSMUSG00000035352(Ccl12),ENSMUSG00000040253(Gbp7),ENSMUSG00000041515(Irf8),ENSMUSG00000046879(Irgm1),ENSMUSG00000069874(Irgm2),ENSMUSG00000073421(H2-Ab1),ENSMUSG00000074151(Nlrc5),ENSMUSG00000079363(Gbp4),ENSMUSG00000104713…	-
MF	GO:0005525	GTP binding	28	1	29	382	7.02215e-11	9.523e-09	ENSMUSG00000027293(Ehd4),ENSMUSG00000027639(Samhd1),ENSMUSG00000028268(Gbp3),ENSMUSG00000028270(Gbp2),ENSMUSG00000029204(Rhoh),ENSMUSG00000029298(Gbp9),ENSMUSG00000040253(Gbp7),ENSMUSG00000040264(Gbp2b),ENSMUSG00000045868(Gvin1),ENSMUSG00000046879(Irgm1),ENSMUSG00000047446(Arl4a),ENSMUSG00000048852(Gm12185),ENSMUSG00000054072(Iigp1),ENSMUSG00000058163(Gm5431),ENSMUSG00000068606(Gm4841),ENSMUSG000…	ENSMUSG00000022621(Rabl2)
CC	GO:0020003	symbiont-containing vacuole	7	0	7	10	8.58328e-11	1.04523e-08	ENSMUSG00000028268(Gbp3),ENSMUSG00000028270(Gbp2),ENSMUSG00000029298(Gbp9),ENSMUSG00000040253(Gbp7),ENSMUSG00000054072(Iigp1),ENSMUSG00000069874(Irgm2),ENSMUSG00000104713(Gbp6)	-
CC	GO:0030430	host cell cytoplasm	7	0	7	10	8.58328e-11	1.04523e-08	ENSMUSG00000028268(Gbp3),ENSMUSG00000028270(Gbp2),ENSMUSG00000029298(Gbp9),ENSMUSG00000040253(Gbp7),ENSMUSG00000054072(Iigp1),ENSMUSG00000069874(Irgm2),ENSMUSG00000104713(Gbp6)	-
CC	GO:0033646	host intracellular part	7	0	7	10	8.58328e-11	1.04523e-08	ENSMUSG00000028268(Gbp3),ENSMUSG00000028270(Gbp2),ENSMUSG00000029298(Gbp9),ENSMUSG00000040253(Gbp7),ENSMUSG00000054072(Iigp1),ENSMUSG00000069874(Irgm2),ENSMUSG00000104713(Gbp6)	-
CC	GO:0033655	host cell cytoplasm part	7	0	7	10	8.58328e-11	1.04523e-08	ENSMUSG00000028268(Gbp3),ENSMUSG00000028270(Gbp2),ENSMUSG00000029298(Gbp9),ENSMUSG00000040253(Gbp7),ENSMUSG00000054072(Iigp1),ENSMUSG00000069874(Irgm2),ENSMUSG00000104713(Gbp6)	-
CC	GO:0043656	host intracellular region	7	0	7	10	8.58328e-11	1.04523e-08	ENSMUSG00000028268(Gbp3),ENSMUSG00000028270(Gbp2),ENSMUSG00000029298(Gbp9),ENSMUSG00000040253(Gbp7),ENSMUSG00000054072(Iigp1),ENSMUSG00000069874(Irgm2),ENSMUSG00000104713(Gbp6)	-
MF	GO:0032550	purine ribonucleoside binding	28	1	29	389	1.08268e-10	1.29207e-08	ENSMUSG00000027293(Ehd4),ENSMUSG00000027639(Samhd1),ENSMUSG00000028268(Gbp3),ENSMUSG00000028270(Gbp2),ENSMUSG00000029204(Rhoh),ENSMUSG00000029298(Gbp9),ENSMUSG00000040253(Gbp7),ENSMUSG00000040264(Gbp2b),ENSMUSG00000045868(Gvin1),ENSMUSG00000046879(Irgm1),ENSMUSG00000047446(Arl4a),ENSMUSG00000048852(Gm12185),ENSMUSG00000054072(Iigp1),ENSMUSG00000058163(Gm5431),ENSMUSG00000068606(Gm4841),ENSMUSG000…	ENSMUSG00000022621(Rabl2)
BP	GO:0001816	cytokine production	39	2	41	718	1.18093e-10	1.38168e-08	ENSMUSG00000004040(Stat3),ENSMUSG00000004698(Hdac9),ENSMUSG00000006310(Zbtb32),ENSMUSG00000014361(Mertk),ENSMUSG00000014773(Dll1),ENSMUSG00000015316(Slamf1),ENSMUSG00000017830(Dhx58),ENSMUSG00000020641(Rsad2),ENSMUSG00000024079(Eif2ak2),ENSMUSG00000024397(Aif1),ENSMUSG00000024610(Cd74),ENSMUSG00000025498(Irf7),ENSMUSG00000026535(Ifi202b),ENSMUSG00000026536(Ifi211),ENSMUSG00000026896(Ifih1),ENSMUS…	ENSMUSG00000023915(Tnfrsf21),ENSMUSG00000056501(Cebpb)
MF	GO:0032549	ribonucleoside binding	28	1	29	392	1.29935e-10	1.49101e-08	ENSMUSG00000027293(Ehd4),ENSMUSG00000027639(Samhd1),ENSMUSG00000028268(Gbp3),ENSMUSG00000028270(Gbp2),ENSMUSG00000029204(Rhoh),ENSMUSG00000029298(Gbp9),ENSMUSG00000040253(Gbp7),ENSMUSG00000040264(Gbp2b),ENSMUSG00000045868(Gvin1),ENSMUSG00000046879(Irgm1),ENSMUSG00000047446(Arl4a),ENSMUSG00000048852(Gm12185),ENSMUSG00000054072(Iigp1),ENSMUSG00000058163(Gm5431),ENSMUSG00000068606(Gm4841),ENSMUSG000…	ENSMUSG00000022621(Rabl2)
BP	GO:0050778	positive regulation of immune response	32	1	33	490	1.33686e-10	1.5051e-08	ENSMUSG00000001128(Cfp),ENSMUSG00000010358(Ifi35),ENSMUSG00000015947(Fcgr1),ENSMUSG00000020641(Rsad2),ENSMUSG00000024610(Cd74),ENSMUSG00000025058(Tasl),ENSMUSG00000025498(Irf7),ENSMUSG00000026535(Ifi202b),ENSMUSG00000026536(Ifi211),ENSMUSG00000027514(Zbp1),ENSMUSG00000030149(Klrk1),ENSMUSG00000031712(Il15),ENSMUSG00000036887(C1qa),ENSMUSG00000036905(C1qb),ENSMUSG00000037447(Arid5a),ENSMUSG0000003…	ENSMUSG00000023915(Tnfrsf21)
MF	GO:0001883	purine nucleoside binding	28	1	29	393	1.38025e-10	1.52518e-08	ENSMUSG00000027293(Ehd4),ENSMUSG00000027639(Samhd1),ENSMUSG00000028268(Gbp3),ENSMUSG00000028270(Gbp2),ENSMUSG00000029204(Rhoh),ENSMUSG00000029298(Gbp9),ENSMUSG00000040253(Gbp7),ENSMUSG00000040264(Gbp2b),ENSMUSG00000045868(Gvin1),ENSMUSG00000046879(Irgm1),ENSMUSG00000047446(Arl4a),ENSMUSG00000048852(Gm12185),ENSMUSG00000054072(Iigp1),ENSMUSG00000058163(Gm5431),ENSMUSG00000068606(Gm4841),ENSMUSG000…	ENSMUSG00000022621(Rabl2)
BP	GO:0001817	regulation of cytokine production	38	2	40	693	1.47188e-10	1.59685e-08	ENSMUSG00000004040(Stat3),ENSMUSG00000004698(Hdac9),ENSMUSG00000006310(Zbtb32),ENSMUSG00000014361(Mertk),ENSMUSG00000014773(Dll1),ENSMUSG00000015316(Slamf1),ENSMUSG00000017830(Dhx58),ENSMUSG00000020641(Rsad2),ENSMUSG00000024079(Eif2ak2),ENSMUSG00000024397(Aif1),ENSMUSG00000024610(Cd74),ENSMUSG00000025498(Irf7),ENSMUSG00000026535(Ifi202b),ENSMUSG00000026536(Ifi211),ENSMUSG00000026896(Ifih1),ENSMUS…	ENSMUSG00000023915(Tnfrsf21),ENSMUSG00000056501(Cebpb)
CC	GO:0033643	host cell part	7	0	7	11	2.32254e-10	2.47475e-08	ENSMUSG00000028268(Gbp3),ENSMUSG00000028270(Gbp2),ENSMUSG00000029298(Gbp9),ENSMUSG00000040253(Gbp7),ENSMUSG00000054072(Iigp1),ENSMUSG00000069874(Irgm2),ENSMUSG00000104713(Gbp6)	-
MF	GO:0019001	guanyl nucleotide binding	28	1	29	406	2.97255e-10	3.05814e-08	ENSMUSG00000027293(Ehd4),ENSMUSG00000027639(Samhd1),ENSMUSG00000028268(Gbp3),ENSMUSG00000028270(Gbp2),ENSMUSG00000029204(Rhoh),ENSMUSG00000029298(Gbp9),ENSMUSG00000040253(Gbp7),ENSMUSG00000040264(Gbp2b),ENSMUSG00000045868(Gvin1),ENSMUSG00000046879(Irgm1),ENSMUSG00000047446(Arl4a),ENSMUSG00000048852(Gm12185),ENSMUSG00000054072(Iigp1),ENSMUSG00000058163(Gm5431),ENSMUSG00000068606(Gm4841),ENSMUSG000…	ENSMUSG00000022621(Rabl2)
MF	GO:0032561	guanyl ribonucleotide binding	28	1	29	406	2.97255e-10	3.05814e-08	ENSMUSG00000027293(Ehd4),ENSMUSG00000027639(Samhd1),ENSMUSG00000028268(Gbp3),ENSMUSG00000028270(Gbp2),ENSMUSG00000029204(Rhoh),ENSMUSG00000029298(Gbp9),ENSMUSG00000040253(Gbp7),ENSMUSG00000040264(Gbp2b),ENSMUSG00000045868(Gvin1),ENSMUSG00000046879(Irgm1),ENSMUSG00000047446(Arl4a),ENSMUSG00000048852(Gm12185),ENSMUSG00000054072(Iigp1),ENSMUSG00000058163(Gm5431),ENSMUSG00000068606(Gm4841),ENSMUSG000…	ENSMUSG00000022621(Rabl2)
CC	GO:0065010	extracellular membrane-bounded organelle	7	0	7	12	5.48471e-10	5.547e-08	ENSMUSG00000028268(Gbp3),ENSMUSG00000028270(Gbp2),ENSMUSG00000029298(Gbp9),ENSMUSG00000040253(Gbp7),ENSMUSG00000054072(Iigp1),ENSMUSG00000069874(Irgm2),ENSMUSG00000104713(Gbp6)	-
BP	GO:0002221	pattern recognition receptor signaling pathway	17	1	18	156	5.92258e-10	5.89e-08	ENSMUSG00000010358(Ifi35),ENSMUSG00000017830(Dhx58),ENSMUSG00000020641(Rsad2),ENSMUSG00000022901(Cd86),ENSMUSG00000025058(Tasl),ENSMUSG00000025498(Irf7),ENSMUSG00000026896(Ifih1),ENSMUSG00000030921(Trim30a),ENSMUSG00000031639(Tlr3),ENSMUSG00000037921(Ddx60),ENSMUSG00000038058(Nod1),ENSMUSG00000040296(Ddx58),ENSMUSG00000044583(Tlr7),ENSMUSG00000045322(Tlr9),ENSMUSG00000048621(Gm6377),ENSMUSG000000…	ENSMUSG00000026883(Dab2ip)
BP	GO:0048584	positive regulation of response to stimulus	73	6	79	2151	1.03172e-09	1.00922e-07	ENSMUSG00000001128(Cfp),ENSMUSG00000004040(Stat3),ENSMUSG00000009185(Ccl8),ENSMUSG00000010358(Ifi35),ENSMUSG00000012519(Mlkl),ENSMUSG00000014773(Dll1),ENSMUSG00000015316(Slamf1),ENSMUSG00000015947(Fcgr1),ENSMUSG00000016524(Il19),ENSMUSG00000017830(Dhx58),ENSMUSG00000019979(Apaf1),ENSMUSG00000020641(Rsad2),ENSMUSG00000020717(Pecam1),ENSMUSG00000021367(Edn1),ENSMUSG00000021423(Ly86),ENSMUSG00000022…	ENSMUSG00000023915(Tnfrsf21),ENSMUSG00000026883(Dab2ip),ENSMUSG00000028539(Artn),ENSMUSG00000034957(Cebpa),ENSMUSG00000038065(Mturn),ENSMUSG00000056501(Cebpb)
BP	GO:0035455	response to interferon-alpha	9	0	9	28	1.05711e-09	1.01739e-07	ENSMUSG00000024079(Eif2ak2),ENSMUSG00000025492(Ifitm3),ENSMUSG00000034459(Ifit1),ENSMUSG00000045932(Ifit2),ENSMUSG00000062488(Ifit3b),ENSMUSG00000073489(Ifi204),ENSMUSG00000074896(Ifit3),ENSMUSG00000078921(Tgtp2),ENSMUSG00000078922(Tgtp1)	-
CC	GO:0020005	symbiont-containing vacuole membrane	6	0	6	8	1.10741e-09	1.04888e-07	ENSMUSG00000028268(Gbp3),ENSMUSG00000028270(Gbp2),ENSMUSG00000029298(Gbp9),ENSMUSG00000040253(Gbp7),ENSMUSG00000054072(Iigp1),ENSMUSG00000104713(Gbp6)	-
BP	GO:0045321	leukocyte activation	39	4	43	851	1.77415e-09	1.65412e-07	ENSMUSG00000004040(Stat3),ENSMUSG00000006310(Zbtb32),ENSMUSG00000010358(Ifi35),ENSMUSG00000014361(Mertk),ENSMUSG00000014773(Dll1),ENSMUSG00000015316(Slamf1),ENSMUSG00000020641(Rsad2),ENSMUSG00000021127(Zfp36l1),ENSMUSG00000022876(Samsn1),ENSMUSG00000022901(Cd86),ENSMUSG00000023206(Il15ra),ENSMUSG00000024238(Zeb1),ENSMUSG00000024397(Aif1),ENSMUSG00000024610(Cd74),ENSMUSG00000026770(Il2ra),ENSMUSG0…	ENSMUSG00000023915(Tnfrsf21),ENSMUSG00000034957(Cebpa),ENSMUSG00000046006(Gapt),ENSMUSG00000056501(Cebpb)
CC	GO:0018995	host cellular component	7	0	7	14	2.30112e-09	2.08042e-07	ENSMUSG00000028268(Gbp3),ENSMUSG00000028270(Gbp2),ENSMUSG00000029298(Gbp9),ENSMUSG00000040253(Gbp7),ENSMUSG00000054072(Iigp1),ENSMUSG00000069874(Irgm2),ENSMUSG00000104713(Gbp6)	-
CC	GO:0043657	host cell	7	0	7	14	2.30112e-09	2.08042e-07	ENSMUSG00000028268(Gbp3),ENSMUSG00000028270(Gbp2),ENSMUSG00000029298(Gbp9),ENSMUSG00000040253(Gbp7),ENSMUSG00000054072(Iigp1),ENSMUSG00000069874(Irgm2),ENSMUSG00000104713(Gbp6)	-
BP	GO:0001819	positive regulation of cytokine production	28	1	29	447	4.30111e-09	3.83055e-07	ENSMUSG00000004040(Stat3),ENSMUSG00000015316(Slamf1),ENSMUSG00000017830(Dhx58),ENSMUSG00000020641(Rsad2),ENSMUSG00000024079(Eif2ak2),ENSMUSG00000024397(Aif1),ENSMUSG00000024610(Cd74),ENSMUSG00000025498(Irf7),ENSMUSG00000026535(Ifi202b),ENSMUSG00000026536(Ifi211),ENSMUSG00000026896(Ifih1),ENSMUSG00000030149(Klrk1),ENSMUSG00000031639(Tlr3),ENSMUSG00000031712(Il15),ENSMUSG00000037447(Arid5a),ENSMUSG…	ENSMUSG00000056501(Cebpb)
BP	GO:0071222	cellular response to lipopolysaccharide	17	2	19	219	2.35744e-08	2.06865e-06	ENSMUSG00000020638(Cmpk2),ENSMUSG00000021423(Ly86),ENSMUSG00000022901(Cd86),ENSMUSG00000028270(Gbp2),ENSMUSG00000029417(Cxcl9),ENSMUSG00000030149(Klrk1),ENSMUSG00000034855(Cxcl10),ENSMUSG00000035352(Ccl12),ENSMUSG00000037447(Arid5a),ENSMUSG00000041515(Irf8),ENSMUSG00000044786(Zfp36),ENSMUSG00000045322(Tlr9),ENSMUSG00000057135(Scimp),ENSMUSG00000059089(Fcgr4),ENSMUSG00000069874(Irgm2),ENSMUSG00000…	ENSMUSG00000026883(Dab2ip),ENSMUSG00000056501(Cebpb)
BP	GO:0001775	cell activation	40	4	44	966	2.52478e-08	2.18338e-06	ENSMUSG00000004040(Stat3),ENSMUSG00000006310(Zbtb32),ENSMUSG00000010358(Ifi35),ENSMUSG00000014361(Mertk),ENSMUSG00000014773(Dll1),ENSMUSG00000015316(Slamf1),ENSMUSG00000020641(Rsad2),ENSMUSG00000021127(Zfp36l1),ENSMUSG00000022876(Samsn1),ENSMUSG00000022901(Cd86),ENSMUSG00000023206(Il15ra),ENSMUSG00000024238(Zeb1),ENSMUSG00000024397(Aif1),ENSMUSG00000024610(Cd74),ENSMUSG00000026770(Il2ra),ENSMUSG0…	ENSMUSG00000023915(Tnfrsf21),ENSMUSG00000034957(Cebpa),ENSMUSG00000046006(Gapt),ENSMUSG00000056501(Cebpb)
BP	GO:0071219	cellular response to molecule of bacterial origin	17	2	19	226	3.91389e-08	3.33631e-06	ENSMUSG00000020638(Cmpk2),ENSMUSG00000021423(Ly86),ENSMUSG00000022901(Cd86),ENSMUSG00000028270(Gbp2),ENSMUSG00000029417(Cxcl9),ENSMUSG00000030149(Klrk1),ENSMUSG00000034855(Cxcl10),ENSMUSG00000035352(Ccl12),ENSMUSG00000037447(Arid5a),ENSMUSG00000041515(Irf8),ENSMUSG00000044786(Zfp36),ENSMUSG00000045322(Tlr9),ENSMUSG00000057135(Scimp),ENSMUSG00000059089(Fcgr4),ENSMUSG00000069874(Irgm2),ENSMUSG00000…	ENSMUSG00000026883(Dab2ip),ENSMUSG00000056501(Cebpb)
BP	GO:0019221	cytokine-mediated signaling pathway	25	1	26	408	3.99482e-08	3.35734e-06	ENSMUSG00000004040(Stat3),ENSMUSG00000009185(Ccl8),ENSMUSG00000021367(Edn1),ENSMUSG00000023206(Il15ra),ENSMUSG00000024610(Cd74),ENSMUSG00000025492(Ifitm3),ENSMUSG00000025498(Irf7),ENSMUSG00000026770(Il2ra),ENSMUSG00000026981(Il1rn),ENSMUSG00000027514(Zbp1),ENSMUSG00000027639(Samhd1),ENSMUSG00000029417(Cxcl9),ENSMUSG00000030745(Il21r),ENSMUSG00000031712(Il15),ENSMUSG00000034855(Cxcl10),ENSMUSG0000…	ENSMUSG00000034957(Cebpa)
BP	GO:0032496	response to lipopolysaccharide	21	3	24	360	5.79682e-08	4.80411e-06	ENSMUSG00000020638(Cmpk2),ENSMUSG00000021367(Edn1),ENSMUSG00000021423(Ly86),ENSMUSG00000022901(Cd86),ENSMUSG00000024079(Eif2ak2),ENSMUSG00000028270(Gbp2),ENSMUSG00000029417(Cxcl9),ENSMUSG00000030149(Klrk1),ENSMUSG00000031628(Casp3),ENSMUSG00000034855(Cxcl10),ENSMUSG00000035352(Ccl12),ENSMUSG00000037447(Arid5a),ENSMUSG00000037944(Ccr7),ENSMUSG00000041515(Irf8),ENSMUSG00000044786(Zfp36),ENSMUSG0000…	ENSMUSG00000026883(Dab2ip),ENSMUSG00000036867(Smad6),ENSMUSG00000056501(Cebpb)
MF	GO:0032555	purine ribonucleotide binding	59	8	67	1905	5.98691e-08	4.89368e-06	ENSMUSG00000002227(Mov10),ENSMUSG00000005237(Dnah2),ENSMUSG00000012519(Mlkl),ENSMUSG00000014361(Mertk),ENSMUSG00000017830(Dhx58),ENSMUSG00000019979(Apaf1),ENSMUSG00000020638(Cmpk2),ENSMUSG00000024079(Eif2ak2),ENSMUSG00000025324(Atp10a),ENSMUSG00000026764(Kif5c),ENSMUSG00000026773(Pfkfb3),ENSMUSG00000026896(Ifih1),ENSMUSG00000027293(Ehd4),ENSMUSG00000027639(Samhd1),ENSMUSG00000028268(Gbp3),ENSMUSG…	ENSMUSG00000009566(Fpgs),ENSMUSG00000022621(Rabl2),ENSMUSG00000026409(Pfkfb2),ENSMUSG00000026575(Nme7),ENSMUSG00000026785(Pkn3),ENSMUSG00000027379(Bub1),ENSMUSG00000028933(Xrcc2),ENSMUSG00000032456(Nmnat3)
BP	GO:0044403	symbiotic process	25	0	25	389	6.22684e-08	5.02102e-06	ENSMUSG00000006411(Nectin4),ENSMUSG00000020641(Rsad2),ENSMUSG00000024079(Eif2ak2),ENSMUSG00000024610(Cd74),ENSMUSG00000025492(Ifitm3),ENSMUSG00000027514(Zbp1),ENSMUSG00000028268(Gbp3),ENSMUSG00000028270(Gbp2),ENSMUSG00000029298(Gbp9),ENSMUSG00000030921(Trim30a),ENSMUSG00000032661(Oas3),ENSMUSG00000035692(Isg15),ENSMUSG00000036986(Pml),ENSMUSG00000039236(Isg20),ENSMUSG00000040253(Gbp7),ENSMUSG0000…	-
BP	GO:0019882	antigen processing and presentation	13	0	13	105	6.37125e-08	5.06896e-06	ENSMUSG00000015947(Fcgr1),ENSMUSG00000024610(Cd74),ENSMUSG00000035929(H2-Q4),ENSMUSG00000036594(H2-Aa),ENSMUSG00000037321(Tap1),ENSMUSG00000037944(Ccr7),ENSMUSG00000038058(Nod1),ENSMUSG00000039899(Fgl2),ENSMUSG00000053835(H2-T24),ENSMUSG00000056116(H2-T22),ENSMUSG00000060586(H2-Eb1),ENSMUSG00000073421(H2-Ab1),ENSMUSG00000079547(H2-DMb1)	-
MF	GO:0035639	purine ribonucleoside triphosphate binding	57	8	65	1829	6.70165e-08	5.26168e-06	ENSMUSG00000002227(Mov10),ENSMUSG00000005237(Dnah2),ENSMUSG00000012519(Mlkl),ENSMUSG00000014361(Mertk),ENSMUSG00000017830(Dhx58),ENSMUSG00000019979(Apaf1),ENSMUSG00000020638(Cmpk2),ENSMUSG00000024079(Eif2ak2),ENSMUSG00000025324(Atp10a),ENSMUSG00000026764(Kif5c),ENSMUSG00000026773(Pfkfb3),ENSMUSG00000026896(Ifih1),ENSMUSG00000027293(Ehd4),ENSMUSG00000027639(Samhd1),ENSMUSG00000028268(Gbp3),ENSMUSG…	ENSMUSG00000009566(Fpgs),ENSMUSG00000022621(Rabl2),ENSMUSG00000026409(Pfkfb2),ENSMUSG00000026575(Nme7),ENSMUSG00000026785(Pkn3),ENSMUSG00000027379(Bub1),ENSMUSG00000028933(Xrcc2),ENSMUSG00000032456(Nmnat3)
MF	GO:0016462	pyrophosphatase activity	36	2	38	814	7.77664e-08	6.02639e-06	ENSMUSG00000002227(Mov10),ENSMUSG00000005237(Dnah2),ENSMUSG00000017830(Dhx58),ENSMUSG00000023961(Enpp4),ENSMUSG00000026764(Kif5c),ENSMUSG00000026896(Ifih1),ENSMUSG00000027669(Gnb4),ENSMUSG00000028100(Nudt17),ENSMUSG00000028268(Gbp3),ENSMUSG00000028270(Gbp2),ENSMUSG00000029204(Rhoh),ENSMUSG00000029298(Gbp9),ENSMUSG00000034329(Brip1),ENSMUSG00000037321(Tap1),ENSMUSG00000040253(Gbp7),ENSMUSG00000040…	ENSMUSG00000022621(Rabl2),ENSMUSG00000028933(Xrcc2)
MF	GO:0017076	purine nucleotide binding	59	8	67	1919	7.9033e-08	6.04602e-06	ENSMUSG00000002227(Mov10),ENSMUSG00000005237(Dnah2),ENSMUSG00000012519(Mlkl),ENSMUSG00000014361(Mertk),ENSMUSG00000017830(Dhx58),ENSMUSG00000019979(Apaf1),ENSMUSG00000020638(Cmpk2),ENSMUSG00000024079(Eif2ak2),ENSMUSG00000025324(Atp10a),ENSMUSG00000026764(Kif5c),ENSMUSG00000026773(Pfkfb3),ENSMUSG00000026896(Ifih1),ENSMUSG00000027293(Ehd4),ENSMUSG00000027639(Samhd1),ENSMUSG00000028268(Gbp3),ENSMUSG…	ENSMUSG00000009566(Fpgs),ENSMUSG00000022621(Rabl2),ENSMUSG00000026409(Pfkfb2),ENSMUSG00000026575(Nme7),ENSMUSG00000026785(Pkn3),ENSMUSG00000027379(Bub1),ENSMUSG00000028933(Xrcc2),ENSMUSG00000032456(Nmnat3)
MF	GO:0016817	hydrolase activity, acting on acid anhydrides	36	2	38	816	8.2824e-08	6.17763e-06	ENSMUSG00000002227(Mov10),ENSMUSG00000005237(Dnah2),ENSMUSG00000017830(Dhx58),ENSMUSG00000023961(Enpp4),ENSMUSG00000026764(Kif5c),ENSMUSG00000026896(Ifih1),ENSMUSG00000027669(Gnb4),ENSMUSG00000028100(Nudt17),ENSMUSG00000028268(Gbp3),ENSMUSG00000028270(Gbp2),ENSMUSG00000029204(Rhoh),ENSMUSG00000029298(Gbp9),ENSMUSG00000034329(Brip1),ENSMUSG00000037321(Tap1),ENSMUSG00000040253(Gbp7),ENSMUSG00000040…	ENSMUSG00000022621(Rabl2),ENSMUSG00000028933(Xrcc2)
MF	GO:0016818	hydrolase activity, acting on acid anhydrides, in phosphorus-containing anhydrides	36	2	38	816	8.2824e-08	6.17763e-06	ENSMUSG00000002227(Mov10),ENSMUSG00000005237(Dnah2),ENSMUSG00000017830(Dhx58),ENSMUSG00000023961(Enpp4),ENSMUSG00000026764(Kif5c),ENSMUSG00000026896(Ifih1),ENSMUSG00000027669(Gnb4),ENSMUSG00000028100(Nudt17),ENSMUSG00000028268(Gbp3),ENSMUSG00000028270(Gbp2),ENSMUSG00000029204(Rhoh),ENSMUSG00000029298(Gbp9),ENSMUSG00000034329(Brip1),ENSMUSG00000037321(Tap1),ENSMUSG00000040253(Gbp7),ENSMUSG00000040…	ENSMUSG00000022621(Rabl2),ENSMUSG00000028933(Xrcc2)
MF	GO:0032553	ribonucleotide binding	59	8	67	1923	8.5499e-08	6.29843e-06	ENSMUSG00000002227(Mov10),ENSMUSG00000005237(Dnah2),ENSMUSG00000012519(Mlkl),ENSMUSG00000014361(Mertk),ENSMUSG00000017830(Dhx58),ENSMUSG00000019979(Apaf1),ENSMUSG00000020638(Cmpk2),ENSMUSG00000024079(Eif2ak2),ENSMUSG00000025324(Atp10a),ENSMUSG00000026764(Kif5c),ENSMUSG00000026773(Pfkfb3),ENSMUSG00000026896(Ifih1),ENSMUSG00000027293(Ehd4),ENSMUSG00000027639(Samhd1),ENSMUSG00000028268(Gbp3),ENSMUSG…	ENSMUSG00000009566(Fpgs),ENSMUSG00000022621(Rabl2),ENSMUSG00000026409(Pfkfb2),ENSMUSG00000026575(Nme7),ENSMUSG00000026785(Pkn3),ENSMUSG00000027379(Bub1),ENSMUSG00000028933(Xrcc2),ENSMUSG00000032456(Nmnat3)
BP	GO:0032675	regulation of interleukin-6 production	14	1	15	148	9.39556e-08	6.83699e-06	ENSMUSG00000004040(Stat3),ENSMUSG00000015316(Slamf1),ENSMUSG00000024397(Aif1),ENSMUSG00000024610(Cd74),ENSMUSG00000026896(Ifih1),ENSMUSG00000030921(Trim30a),ENSMUSG00000031639(Tlr3),ENSMUSG00000037447(Arid5a),ENSMUSG00000038058(Nod1),ENSMUSG00000040296(Ddx58),ENSMUSG00000044583(Tlr7),ENSMUSG00000045322(Tlr9),ENSMUSG00000057135(Scimp),ENSMUSG00000079227(Ccr5)	ENSMUSG00000056501(Cebpb)
BP	GO:0002694	regulation of leukocyte activation	26	3	29	517	1.03626e-07	7.44982e-06	ENSMUSG00000014361(Mertk),ENSMUSG00000015316(Slamf1),ENSMUSG00000021127(Zfp36l1),ENSMUSG00000022876(Samsn1),ENSMUSG00000022901(Cd86),ENSMUSG00000023206(Il15ra),ENSMUSG00000024238(Zeb1),ENSMUSG00000024397(Aif1),ENSMUSG00000024610(Cd74),ENSMUSG00000026770(Il2ra),ENSMUSG00000029204(Rhoh),ENSMUSG00000030149(Klrk1),ENSMUSG00000030560(Ctsc),ENSMUSG00000031628(Casp3),ENSMUSG00000031712(Il15),ENSMUSG0000…	ENSMUSG00000023915(Tnfrsf21),ENSMUSG00000034957(Cebpa),ENSMUSG00000056501(Cebpb)
BP	GO:0002237	response to molecule of bacterial origin	21	3	24	376	1.30449e-07	9.26655e-06	ENSMUSG00000020638(Cmpk2),ENSMUSG00000021367(Edn1),ENSMUSG00000021423(Ly86),ENSMUSG00000022901(Cd86),ENSMUSG00000024079(Eif2ak2),ENSMUSG00000028270(Gbp2),ENSMUSG00000029417(Cxcl9),ENSMUSG00000030149(Klrk1),ENSMUSG00000031628(Casp3),ENSMUSG00000034855(Cxcl10),ENSMUSG00000035352(Ccl12),ENSMUSG00000037447(Arid5a),ENSMUSG00000037944(Ccr7),ENSMUSG00000041515(Irf8),ENSMUSG00000044786(Zfp36),ENSMUSG0000…	ENSMUSG00000026883(Dab2ip),ENSMUSG00000036867(Smad6),ENSMUSG00000056501(Cebpb)
BP	GO:0032635	interleukin-6 production	14	1	15	152	1.33838e-07	9.39546e-06	ENSMUSG00000004040(Stat3),ENSMUSG00000015316(Slamf1),ENSMUSG00000024397(Aif1),ENSMUSG00000024610(Cd74),ENSMUSG00000026896(Ifih1),ENSMUSG00000030921(Trim30a),ENSMUSG00000031639(Tlr3),ENSMUSG00000037447(Arid5a),ENSMUSG00000038058(Nod1),ENSMUSG00000040296(Ddx58),ENSMUSG00000044583(Tlr7),ENSMUSG00000045322(Tlr9),ENSMUSG00000057135(Scimp),ENSMUSG00000079227(Ccr5)	ENSMUSG00000056501(Cebpb)
BP	GO:0051716	cellular response to stimulus	169	28	197	8071	1.36075e-07	9.44139e-06	ENSMUSG00000000184(Ccnd2),ENSMUSG00000001552(Jup),ENSMUSG00000001768(Rin2),ENSMUSG00000002307(Daxx),ENSMUSG00000004040(Stat3),ENSMUSG00000004698(Hdac9),ENSMUSG00000009185(Ccl8),ENSMUSG00000010358(Ifi35),ENSMUSG00000012519(Mlkl),ENSMUSG00000014361(Mertk),ENSMUSG00000014773(Dll1),ENSMUSG00000015222(Map2),ENSMUSG00000015316(Slamf1),ENSMUSG00000015852(Fcrls),ENSMUSG00000015947(Fcgr1),ENSMUSG000000165…	ENSMUSG00000001227(Sema6b),ENSMUSG00000006442(Srm),ENSMUSG00000016984(Etaa1),ENSMUSG00000020974(Pole2),ENSMUSG00000022474(Pmm1),ENSMUSG00000022494(Shisa9),ENSMUSG00000023915(Tnfrsf21),ENSMUSG00000024186(Rgs11),ENSMUSG00000025764(Jade1),ENSMUSG00000025931(Paqr8),ENSMUSG00000026785(Pkn3),ENSMUSG00000026883(Dab2ip),ENSMUSG00000028539(Artn),ENSMUSG00000028933(Xrcc2),ENSMUSG00000030322(Mbd4),ENSMUSG00…
MF	GO:0017111	nucleoside-triphosphatase activity	34	2	36	765	1.43934e-07	9.87192e-06	ENSMUSG00000002227(Mov10),ENSMUSG00000005237(Dnah2),ENSMUSG00000017830(Dhx58),ENSMUSG00000026764(Kif5c),ENSMUSG00000026896(Ifih1),ENSMUSG00000027669(Gnb4),ENSMUSG00000028268(Gbp3),ENSMUSG00000028270(Gbp2),ENSMUSG00000029204(Rhoh),ENSMUSG00000029298(Gbp9),ENSMUSG00000034329(Brip1),ENSMUSG00000037321(Tap1),ENSMUSG00000040253(Gbp7),ENSMUSG00000040264(Gbp2b),ENSMUSG00000040296(Ddx58),ENSMUSG000000468…	ENSMUSG00000022621(Rabl2),ENSMUSG00000028933(Xrcc2)
BP	GO:0071216	cellular response to biotic stimulus	17	2	19	250	1.92895e-07	1.30796e-05	ENSMUSG00000020638(Cmpk2),ENSMUSG00000021423(Ly86),ENSMUSG00000022901(Cd86),ENSMUSG00000028270(Gbp2),ENSMUSG00000029417(Cxcl9),ENSMUSG00000030149(Klrk1),ENSMUSG00000034855(Cxcl10),ENSMUSG00000035352(Ccl12),ENSMUSG00000037447(Arid5a),ENSMUSG00000041515(Irf8),ENSMUSG00000044786(Zfp36),ENSMUSG00000045322(Tlr9),ENSMUSG00000057135(Scimp),ENSMUSG00000059089(Fcgr4),ENSMUSG00000069874(Irgm2),ENSMUSG00000…	ENSMUSG00000026883(Dab2ip),ENSMUSG00000056501(Cebpb)
BP	GO:0032755	positive regulation of interleukin-6 production	12	0	12	98	2.32259e-07	1.55718e-05	ENSMUSG00000004040(Stat3),ENSMUSG00000024397(Aif1),ENSMUSG00000024610(Cd74),ENSMUSG00000026896(Ifih1),ENSMUSG00000031639(Tlr3),ENSMUSG00000037447(Arid5a),ENSMUSG00000038058(Nod1),ENSMUSG00000040296(Ddx58),ENSMUSG00000044583(Tlr7),ENSMUSG00000045322(Tlr9),ENSMUSG00000057135(Scimp),ENSMUSG00000079227(Ccr5)	-
MF	GO:0003725	double-stranded RNA binding	11	0	11	82	2.38399e-07	1.58059e-05	ENSMUSG00000017830(Dhx58),ENSMUSG00000024079(Eif2ak2),ENSMUSG00000026896(Ifih1),ENSMUSG00000027514(Zbp1),ENSMUSG00000031639(Tlr3),ENSMUSG00000032661(Oas3),ENSMUSG00000037921(Ddx60),ENSMUSG00000040296(Ddx58),ENSMUSG00000041827(Oasl1),ENSMUSG00000044583(Tlr7),ENSMUSG00000066861(Oas1g)	-
BP	GO:0051249	regulation of lymphocyte activation	23	2	25	420	2.68013e-07	1.7574e-05	ENSMUSG00000014361(Mertk),ENSMUSG00000015316(Slamf1),ENSMUSG00000021127(Zfp36l1),ENSMUSG00000022876(Samsn1),ENSMUSG00000022901(Cd86),ENSMUSG00000023206(Il15ra),ENSMUSG00000024238(Zeb1),ENSMUSG00000024397(Aif1),ENSMUSG00000024610(Cd74),ENSMUSG00000026770(Il2ra),ENSMUSG00000029204(Rhoh),ENSMUSG00000031628(Casp3),ENSMUSG00000031712(Il15),ENSMUSG00000036594(H2-Aa),ENSMUSG00000037944(Ccr7),ENSMUSG0000…	ENSMUSG00000023915(Tnfrsf21),ENSMUSG00000056501(Cebpb)
BP	GO:0050688	regulation of defense response to virus	11	0	11	82	2.89942e-07	1.88052e-05	ENSMUSG00000017830(Dhx58),ENSMUSG00000026770(Il2ra),ENSMUSG00000031712(Il15),ENSMUSG00000036986(Pml),ENSMUSG00000037860(Aim2),ENSMUSG00000037921(Ddx60),ENSMUSG00000039899(Fgl2),ENSMUSG00000040296(Ddx58),ENSMUSG00000044701(Il27),ENSMUSG00000079339(Ifit1bl1),ENSMUSG00000079363(Gbp4)	-
BP	GO:0032607	interferon-alpha production	7	0	7	26	3.15431e-07	2.00231e-05	ENSMUSG00000025498(Irf7),ENSMUSG00000026896(Ifih1),ENSMUSG00000031639(Tlr3),ENSMUSG00000040296(Ddx58),ENSMUSG00000044583(Tlr7),ENSMUSG00000045322(Tlr9),ENSMUSG00000079363(Gbp4)	-
BP	GO:0032647	regulation of interferon-alpha production	7	0	7	26	3.15431e-07	2.00231e-05	ENSMUSG00000025498(Irf7),ENSMUSG00000026896(Ifih1),ENSMUSG00000031639(Tlr3),ENSMUSG00000040296(Ddx58),ENSMUSG00000044583(Tlr7),ENSMUSG00000045322(Tlr9),ENSMUSG00000079363(Gbp4)	-
BP	GO:0002250	adaptive immune response	23	1	24	396	3.37015e-07	2.11681e-05	ENSMUSG00000004040(Stat3),ENSMUSG00000015316(Slamf1),ENSMUSG00000015947(Fcgr1),ENSMUSG00000020641(Rsad2),ENSMUSG00000022876(Samsn1),ENSMUSG00000022901(Cd86),ENSMUSG00000024610(Cd74),ENSMUSG00000025498(Irf7),ENSMUSG00000030149(Klrk1),ENSMUSG00000030560(Ctsc),ENSMUSG00000036594(H2-Aa),ENSMUSG00000036887(C1qa),ENSMUSG00000036905(C1qb),ENSMUSG00000037321(Tap1),ENSMUSG00000037447(Arid5a),ENSMUSG000000…	ENSMUSG00000023915(Tnfrsf21)
MF	GO:0005488	binding	237	54	291	13870	3.70835e-07	2.30497e-05	ENSMUSG00000000184(Ccnd2),ENSMUSG00000000247(Lhx2),ENSMUSG00000001156(Mxd1),ENSMUSG00000001552(Jup),ENSMUSG00000002104(Rapsn),ENSMUSG00000002227(Mov10),ENSMUSG00000002307(Daxx),ENSMUSG00000003617(Cp),ENSMUSG00000004040(Stat3),ENSMUSG00000004698(Hdac9),ENSMUSG00000005237(Dnah2),ENSMUSG00000006310(Zbtb32),ENSMUSG00000006411(Nectin4),ENSMUSG00000009185(Ccl8),ENSMUSG00000010358(Ifi35),ENSMUSG00000012…	ENSMUSG00000001227(Sema6b),ENSMUSG00000002769(Gnmt),ENSMUSG00000004105(Angptl2),ENSMUSG00000006442(Srm),ENSMUSG00000009566(Fpgs),ENSMUSG00000020974(Pole2),ENSMUSG00000022474(Pmm1),ENSMUSG00000022494(Shisa9),ENSMUSG00000022621(Rabl2),ENSMUSG00000024056(Ndc80),ENSMUSG00000024186(Rgs11),ENSMUSG00000025732(Mcrip2),ENSMUSG00000025764(Jade1),ENSMUSG00000025931(Paqr8),ENSMUSG00000026409(Pfkfb2),ENSMUSG0…
BP	GO:0032731	positive regulation of interleukin-1 beta production	9	0	9	52	3.82253e-07	2.35145e-05	ENSMUSG00000004040(Stat3),ENSMUSG00000026535(Ifi202b),ENSMUSG00000026536(Ifi211),ENSMUSG00000037860(Aim2),ENSMUSG00000037944(Ccr7),ENSMUSG00000038058(Nod1),ENSMUSG00000054203(Ifi205),ENSMUSG00000073489(Ifi204),ENSMUSG00000079227(Ccr5)	-
BP	GO:0002683	negative regulation of immune system process	24	2	26	460	4.17259e-07	2.5406e-05	ENSMUSG00000014361(Mertk),ENSMUSG00000014773(Dll1),ENSMUSG00000015316(Slamf1),ENSMUSG00000017830(Dhx58),ENSMUSG00000021127(Zfp36l1),ENSMUSG00000022876(Samsn1),ENSMUSG00000022901(Cd86),ENSMUSG00000023367(Tmem176a),ENSMUSG00000024610(Cd74),ENSMUSG00000026535(Ifi202b),ENSMUSG00000026770(Il2ra),ENSMUSG00000027639(Samhd1),ENSMUSG00000029810(Tmem176b),ENSMUSG00000031628(Casp3),ENSMUSG00000035352(Ccl12)…	ENSMUSG00000023915(Tnfrsf21),ENSMUSG00000056501(Cebpb)
BP	GO:0050865	regulation of cell activation	26	3	29	558	5.08159e-07	3.06281e-05	ENSMUSG00000014361(Mertk),ENSMUSG00000015316(Slamf1),ENSMUSG00000021127(Zfp36l1),ENSMUSG00000022876(Samsn1),ENSMUSG00000022901(Cd86),ENSMUSG00000023206(Il15ra),ENSMUSG00000024238(Zeb1),ENSMUSG00000024397(Aif1),ENSMUSG00000024610(Cd74),ENSMUSG00000026770(Il2ra),ENSMUSG00000029204(Rhoh),ENSMUSG00000030149(Klrk1),ENSMUSG00000030560(Ctsc),ENSMUSG00000031628(Casp3),ENSMUSG00000031712(Il15),ENSMUSG0000…	ENSMUSG00000023915(Tnfrsf21),ENSMUSG00000034957(Cebpa),ENSMUSG00000056501(Cebpb)
CC	GO:0042613	MHC class II protein complex	5	0	5	10	5.16464e-07	3.08174e-05	ENSMUSG00000024610(Cd74),ENSMUSG00000036594(H2-Aa),ENSMUSG00000060586(H2-Eb1),ENSMUSG00000073421(H2-Ab1),ENSMUSG00000079547(H2-DMb1)	-
BP	GO:0046649	lymphocyte activation	30	3	33	694	6.1063e-07	3.60755e-05	ENSMUSG00000004040(Stat3),ENSMUSG00000006310(Zbtb32),ENSMUSG00000014361(Mertk),ENSMUSG00000014773(Dll1),ENSMUSG00000015316(Slamf1),ENSMUSG00000020641(Rsad2),ENSMUSG00000021127(Zfp36l1),ENSMUSG00000022876(Samsn1),ENSMUSG00000022901(Cd86),ENSMUSG00000023206(Il15ra),ENSMUSG00000024238(Zeb1),ENSMUSG00000024397(Aif1),ENSMUSG00000024610(Cd74),ENSMUSG00000026770(Il2ra),ENSMUSG00000029204(Rhoh),ENSMUSG00…	ENSMUSG00000023915(Tnfrsf21),ENSMUSG00000046006(Gapt),ENSMUSG00000056501(Cebpb)
BP	GO:0060760	positive regulation of response to cytokine stimulus	9	0	9	55	6.29465e-07	3.68237e-05	ENSMUSG00000021367(Edn1),ENSMUSG00000024610(Cd74),ENSMUSG00000025498(Irf7),ENSMUSG00000026896(Ifih1),ENSMUSG00000027514(Zbp1),ENSMUSG00000040296(Ddx58),ENSMUSG00000046879(Irgm1),ENSMUSG00000069874(Irgm2),ENSMUSG00000074151(Nlrc5)	-
BP	GO:0002697	regulation of immune effector process	23	0	23	385	7.62616e-07	4.41799e-05	ENSMUSG00000015316(Slamf1),ENSMUSG00000015947(Fcgr1),ENSMUSG00000017830(Dhx58),ENSMUSG00000020641(Rsad2),ENSMUSG00000024610(Cd74),ENSMUSG00000026770(Il2ra),ENSMUSG00000030149(Klrk1),ENSMUSG00000031639(Tlr3),ENSMUSG00000031712(Il15),ENSMUSG00000036986(Pml),ENSMUSG00000037321(Tap1),ENSMUSG00000037447(Arid5a),ENSMUSG00000037860(Aim2),ENSMUSG00000037921(Ddx60),ENSMUSG00000037944(Ccr7),ENSMUSG00000039…	-
MF	GO:1901363	heterocyclic compound binding	114	28	142	5557	7.87241e-07	4.51679e-05	ENSMUSG00000000247(Lhx2),ENSMUSG00000001156(Mxd1),ENSMUSG00000002227(Mov10),ENSMUSG00000004040(Stat3),ENSMUSG00000005237(Dnah2),ENSMUSG00000006310(Zbtb32),ENSMUSG00000012519(Mlkl),ENSMUSG00000014361(Mertk),ENSMUSG00000017830(Dhx58),ENSMUSG00000019979(Apaf1),ENSMUSG00000020464(Pnpt1),ENSMUSG00000020638(Cmpk2),ENSMUSG00000021127(Zfp36l1),ENSMUSG00000024079(Eif2ak2),ENSMUSG00000024238(Zeb1),ENSMUSG0…	ENSMUSG00000002769(Gnmt),ENSMUSG00000009566(Fpgs),ENSMUSG00000020974(Pole2),ENSMUSG00000022621(Rabl2),ENSMUSG00000026409(Pfkfb2),ENSMUSG00000026575(Nme7),ENSMUSG00000026785(Pkn3),ENSMUSG00000026873(Phf19),ENSMUSG00000027379(Bub1),ENSMUSG00000028933(Xrcc2),ENSMUSG00000030145(Zfp248),ENSMUSG00000030322(Mbd4),ENSMUSG00000032456(Nmnat3),ENSMUSG00000032898(Fbxo21),ENSMUSG00000034800(Zfp661),ENSMUSG000…
BP	GO:0042325	regulation of phosphorylation	50	7	57	1595	8.14296e-07	4.62753e-05	ENSMUSG00000000184(Ccnd2),ENSMUSG00000002307(Daxx),ENSMUSG00000004040(Stat3),ENSMUSG00000009185(Ccl8),ENSMUSG00000012519(Mlkl),ENSMUSG00000014361(Mertk),ENSMUSG00000015316(Slamf1),ENSMUSG00000015947(Fcgr1),ENSMUSG00000020717(Pecam1),ENSMUSG00000021367(Edn1),ENSMUSG00000022876(Samsn1),ENSMUSG00000022901(Cd86),ENSMUSG00000024079(Eif2ak2),ENSMUSG00000024397(Aif1),ENSMUSG00000024610(Cd74),ENSMUSG0000…	ENSMUSG00000016984(Etaa1),ENSMUSG00000026409(Pfkfb2),ENSMUSG00000026883(Dab2ip),ENSMUSG00000036867(Smad6),ENSMUSG00000038065(Mturn),ENSMUSG00000042745(Id1),ENSMUSG00000072082(Ccnf)
BP	GO:0006954	inflammatory response	29	4	33	704	8.38239e-07	4.71843e-05	ENSMUSG00000004040(Stat3),ENSMUSG00000009185(Ccl8),ENSMUSG00000010358(Ifi35),ENSMUSG00000015316(Slamf1),ENSMUSG00000015947(Fcgr1),ENSMUSG00000021423(Ly86),ENSMUSG00000024397(Aif1),ENSMUSG00000026535(Ifi202b),ENSMUSG00000026770(Il2ra),ENSMUSG00000026981(Il1rn),ENSMUSG00000027514(Zbp1),ENSMUSG00000029417(Cxcl9),ENSMUSG00000030107(Usp18),ENSMUSG00000030560(Ctsc),ENSMUSG00000031639(Tlr3),ENSMUSG00000…	ENSMUSG00000026883(Dab2ip),ENSMUSG00000031671(Setd6),ENSMUSG00000034957(Cebpa),ENSMUSG00000056501(Cebpb)
BP	GO:0062207	regulation of pattern recognition receptor signaling pathway	10	1	11	91	8.46107e-07	4.71843e-05	ENSMUSG00000010358(Ifi35),ENSMUSG00000017830(Dhx58),ENSMUSG00000020641(Rsad2),ENSMUSG00000025058(Tasl),ENSMUSG00000025498(Irf7),ENSMUSG00000030921(Trim30a),ENSMUSG00000031639(Tlr3),ENSMUSG00000037921(Ddx60),ENSMUSG00000045322(Tlr9),ENSMUSG00000048621(Gm6377)	ENSMUSG00000026883(Dab2ip)
BP	GO:0045071	negative regulation of viral genome replication	9	0	9	57	8.62398e-07	4.76475e-05	ENSMUSG00000020641(Rsad2),ENSMUSG00000024079(Eif2ak2),ENSMUSG00000025492(Ifitm3),ENSMUSG00000032661(Oas3),ENSMUSG00000035692(Isg15),ENSMUSG00000039236(Isg20),ENSMUSG00000041827(Oasl1),ENSMUSG00000048806(Ifnb1),ENSMUSG00000066861(Oas1g)	-
BP	GO:0002224	toll-like receptor signaling pathway	11	1	12	112	1.00396e-06	5.496e-05	ENSMUSG00000010358(Ifi35),ENSMUSG00000020641(Rsad2),ENSMUSG00000022901(Cd86),ENSMUSG00000025058(Tasl),ENSMUSG00000025498(Irf7),ENSMUSG00000030921(Trim30a),ENSMUSG00000031639(Tlr3),ENSMUSG00000044583(Tlr7),ENSMUSG00000045322(Tlr9),ENSMUSG00000048621(Gm6377),ENSMUSG00000057135(Scimp)	ENSMUSG00000026883(Dab2ip)
MF	GO:0097367	carbohydrate derivative binding	63	8	71	2233	1.07856e-06	5.85069e-05	ENSMUSG00000002227(Mov10),ENSMUSG00000005237(Dnah2),ENSMUSG00000009185(Ccl8),ENSMUSG00000012519(Mlkl),ENSMUSG00000014361(Mertk),ENSMUSG00000017830(Dhx58),ENSMUSG00000019979(Apaf1),ENSMUSG00000020638(Cmpk2),ENSMUSG00000024079(Eif2ak2),ENSMUSG00000025324(Atp10a),ENSMUSG00000026581(Sell),ENSMUSG00000026764(Kif5c),ENSMUSG00000026773(Pfkfb3),ENSMUSG00000026896(Ifih1),ENSMUSG00000027293(Ehd4),ENSMUSG00…	ENSMUSG00000009566(Fpgs),ENSMUSG00000022621(Rabl2),ENSMUSG00000026409(Pfkfb2),ENSMUSG00000026575(Nme7),ENSMUSG00000026785(Pkn3),ENSMUSG00000027379(Bub1),ENSMUSG00000028933(Xrcc2),ENSMUSG00000032456(Nmnat3)
BP	GO:1903900	regulation of viral life cycle	14	0	14	156	1.11796e-06	6.00979e-05	ENSMUSG00000020641(Rsad2),ENSMUSG00000024079(Eif2ak2),ENSMUSG00000024610(Cd74),ENSMUSG00000025492(Ifitm3),ENSMUSG00000030921(Trim30a),ENSMUSG00000032661(Oas3),ENSMUSG00000035692(Isg15),ENSMUSG00000036986(Pml),ENSMUSG00000039236(Isg20),ENSMUSG00000041827(Oasl1),ENSMUSG00000048806(Ifnb1),ENSMUSG00000057596(Trim30d),ENSMUSG00000066861(Oas1g),ENSMUSG00000078616(Trim30c)	-
BP	GO:0050863	regulation of T cell activation	18	2	20	308	1.12974e-06	6.01891e-05	ENSMUSG00000015316(Slamf1),ENSMUSG00000022901(Cd86),ENSMUSG00000024238(Zeb1),ENSMUSG00000024397(Aif1),ENSMUSG00000024610(Cd74),ENSMUSG00000026770(Il2ra),ENSMUSG00000029204(Rhoh),ENSMUSG00000031628(Casp3),ENSMUSG00000031712(Il15),ENSMUSG00000036594(H2-Aa),ENSMUSG00000037944(Ccr7),ENSMUSG00000039899(Fgl2),ENSMUSG00000044701(Il27),ENSMUSG00000048806(Ifnb1),ENSMUSG00000073421(H2-Ab1),ENSMUSG000000787…	ENSMUSG00000023915(Tnfrsf21),ENSMUSG00000056501(Cebpb)
BP	GO:0002253	activation of immune response	18	1	19	281	1.14928e-06	6.06879e-05	ENSMUSG00000001128(Cfp),ENSMUSG00000026535(Ifi202b),ENSMUSG00000026536(Ifi211),ENSMUSG00000027514(Zbp1),ENSMUSG00000030149(Klrk1),ENSMUSG00000036887(C1qa),ENSMUSG00000036905(C1qb),ENSMUSG00000037731(Themis2),ENSMUSG00000037860(Aim2),ENSMUSG00000037944(Ccr7),ENSMUSG00000039997(Ifi203),ENSMUSG00000043263(Ifi209),ENSMUSG00000045322(Tlr9),ENSMUSG00000054203(Ifi205),ENSMUSG00000066677(Ifi208),ENSMUSG0…	ENSMUSG00000023915(Tnfrsf21)
MF	GO:0097159	organic cyclic compound binding	114	29	143	5653	1.29275e-06	6.76654e-05	ENSMUSG00000000247(Lhx2),ENSMUSG00000001156(Mxd1),ENSMUSG00000002227(Mov10),ENSMUSG00000004040(Stat3),ENSMUSG00000005237(Dnah2),ENSMUSG00000006310(Zbtb32),ENSMUSG00000012519(Mlkl),ENSMUSG00000014361(Mertk),ENSMUSG00000017830(Dhx58),ENSMUSG00000019979(Apaf1),ENSMUSG00000020464(Pnpt1),ENSMUSG00000020638(Cmpk2),ENSMUSG00000021127(Zfp36l1),ENSMUSG00000024079(Eif2ak2),ENSMUSG00000024238(Zeb1),ENSMUSG0…	ENSMUSG00000002769(Gnmt),ENSMUSG00000009566(Fpgs),ENSMUSG00000020974(Pole2),ENSMUSG00000022621(Rabl2),ENSMUSG00000025931(Paqr8),ENSMUSG00000026409(Pfkfb2),ENSMUSG00000026575(Nme7),ENSMUSG00000026785(Pkn3),ENSMUSG00000026873(Phf19),ENSMUSG00000027379(Bub1),ENSMUSG00000028933(Xrcc2),ENSMUSG00000030145(Zfp248),ENSMUSG00000030322(Mbd4),ENSMUSG00000032456(Nmnat3),ENSMUSG00000032898(Fbxo21),ENSMUSG0000…
MF	GO:0000166	nucleotide binding	60	9	69	2166	1.4835e-06	7.63107e-05	ENSMUSG00000002227(Mov10),ENSMUSG00000005237(Dnah2),ENSMUSG00000012519(Mlkl),ENSMUSG00000014361(Mertk),ENSMUSG00000017830(Dhx58),ENSMUSG00000019979(Apaf1),ENSMUSG00000020638(Cmpk2),ENSMUSG00000024079(Eif2ak2),ENSMUSG00000025324(Atp10a),ENSMUSG00000026764(Kif5c),ENSMUSG00000026773(Pfkfb3),ENSMUSG00000026896(Ifih1),ENSMUSG00000027293(Ehd4),ENSMUSG00000027639(Samhd1),ENSMUSG00000028268(Gbp3),ENSMUSG…	ENSMUSG00000009566(Fpgs),ENSMUSG00000022621(Rabl2),ENSMUSG00000026409(Pfkfb2),ENSMUSG00000026575(Nme7),ENSMUSG00000026785(Pkn3),ENSMUSG00000027379(Bub1),ENSMUSG00000028933(Xrcc2),ENSMUSG00000032456(Nmnat3),ENSMUSG00000038644(Pold1)
MF	GO:1901265	nucleoside phosphate binding	60	9	69	2166	1.4835e-06	7.63107e-05	ENSMUSG00000002227(Mov10),ENSMUSG00000005237(Dnah2),ENSMUSG00000012519(Mlkl),ENSMUSG00000014361(Mertk),ENSMUSG00000017830(Dhx58),ENSMUSG00000019979(Apaf1),ENSMUSG00000020638(Cmpk2),ENSMUSG00000024079(Eif2ak2),ENSMUSG00000025324(Atp10a),ENSMUSG00000026764(Kif5c),ENSMUSG00000026773(Pfkfb3),ENSMUSG00000026896(Ifih1),ENSMUSG00000027293(Ehd4),ENSMUSG00000027639(Samhd1),ENSMUSG00000028268(Gbp3),ENSMUSG…	ENSMUSG00000009566(Fpgs),ENSMUSG00000022621(Rabl2),ENSMUSG00000026409(Pfkfb2),ENSMUSG00000026575(Nme7),ENSMUSG00000026785(Pkn3),ENSMUSG00000027379(Bub1),ENSMUSG00000028933(Xrcc2),ENSMUSG00000032456(Nmnat3),ENSMUSG00000038644(Pold1)
BP	GO:0042110	T cell activation	24	2	26	493	1.53156e-06	7.81097e-05	ENSMUSG00000004040(Stat3),ENSMUSG00000006310(Zbtb32),ENSMUSG00000015316(Slamf1),ENSMUSG00000020641(Rsad2),ENSMUSG00000021127(Zfp36l1),ENSMUSG00000022901(Cd86),ENSMUSG00000024238(Zeb1),ENSMUSG00000024397(Aif1),ENSMUSG00000024610(Cd74),ENSMUSG00000026770(Il2ra),ENSMUSG00000029204(Rhoh),ENSMUSG00000031628(Casp3),ENSMUSG00000031712(Il15),ENSMUSG00000036594(H2-Aa),ENSMUSG00000037944(Ccr7),ENSMUSG00000…	ENSMUSG00000023915(Tnfrsf21),ENSMUSG00000056501(Cebpb)
BP	GO:0032727	positive regulation of interferon-alpha production	6	0	6	21	1.54638e-06	7.81583e-05	ENSMUSG00000025498(Irf7),ENSMUSG00000026896(Ifih1),ENSMUSG00000031639(Tlr3),ENSMUSG00000040296(Ddx58),ENSMUSG00000044583(Tlr7),ENSMUSG00000045322(Tlr9)	-
BP	GO:0032732	positive regulation of interleukin-1 production	9	0	9	61	1.55871e-06	7.81583e-05	ENSMUSG00000004040(Stat3),ENSMUSG00000026535(Ifi202b),ENSMUSG00000026536(Ifi211),ENSMUSG00000037860(Aim2),ENSMUSG00000037944(Ccr7),ENSMUSG00000038058(Nod1),ENSMUSG00000054203(Ifi205),ENSMUSG00000073489(Ifi204),ENSMUSG00000079227(Ccr5)	-
BP	GO:1903706	regulation of hemopoiesis	21	2	23	403	1.66624e-06	8.28536e-05	ENSMUSG00000004040(Stat3),ENSMUSG00000014773(Dll1),ENSMUSG00000021127(Zfp36l1),ENSMUSG00000023206(Il15ra),ENSMUSG00000023367(Tmem176a),ENSMUSG00000024079(Eif2ak2),ENSMUSG00000024238(Zeb1),ENSMUSG00000024610(Cd74),ENSMUSG00000026770(Il2ra),ENSMUSG00000029204(Rhoh),ENSMUSG00000029810(Tmem176b),ENSMUSG00000031712(Il15),ENSMUSG00000033871(Ppargc1b),ENSMUSG00000035692(Isg15),ENSMUSG00000036594(H2-Aa),…	ENSMUSG00000038065(Mturn),ENSMUSG00000056501(Cebpb)
BP	GO:0032874	positive regulation of stress-activated MAPK cascade	12	2	14	163	1.8912e-06	9.32629e-05	ENSMUSG00000012519(Mlkl),ENSMUSG00000015316(Slamf1),ENSMUSG00000021367(Edn1),ENSMUSG00000024079(Eif2ak2),ENSMUSG00000026121(Sema4c),ENSMUSG00000026981(Il1rn),ENSMUSG00000031639(Tlr3),ENSMUSG00000035299(Mid1),ENSMUSG00000037944(Ccr7),ENSMUSG00000038058(Nod1),ENSMUSG00000045322(Tlr9),ENSMUSG00000057135(Scimp)	ENSMUSG00000026883(Dab2ip),ENSMUSG00000038065(Mturn)
BP	GO:0032651	regulation of interleukin-1 beta production	10	0	10	80	1.96008e-06	9.58672e-05	ENSMUSG00000004040(Stat3),ENSMUSG00000026535(Ifi202b),ENSMUSG00000026536(Ifi211),ENSMUSG00000036986(Pml),ENSMUSG00000037860(Aim2),ENSMUSG00000037944(Ccr7),ENSMUSG00000038058(Nod1),ENSMUSG00000054203(Ifi205),ENSMUSG00000073489(Ifi204),ENSMUSG00000079227(Ccr5)	-
BP	GO:0043903	regulation of interspecies interactions between organisms	16	0	16	213	2.08649e-06	0.00010122	ENSMUSG00000020641(Rsad2),ENSMUSG00000024079(Eif2ak2),ENSMUSG00000024610(Cd74),ENSMUSG00000025492(Ifitm3),ENSMUSG00000030921(Trim30a),ENSMUSG00000032661(Oas3),ENSMUSG00000035692(Isg15),ENSMUSG00000036986(Pml),ENSMUSG00000039236(Isg20),ENSMUSG00000041827(Oasl1),ENSMUSG00000044786(Zfp36),ENSMUSG00000048806(Ifnb1),ENSMUSG00000057596(Trim30d),ENSMUSG00000066861(Oas1g),ENSMUSG00000078616(Trim30c),ENSM…	-
BP	GO:0070304	positive regulation of stress-activated protein kinase signaling cascade	12	2	14	165	2.18618e-06	0.000105029	ENSMUSG00000012519(Mlkl),ENSMUSG00000015316(Slamf1),ENSMUSG00000021367(Edn1),ENSMUSG00000024079(Eif2ak2),ENSMUSG00000026121(Sema4c),ENSMUSG00000026981(Il1rn),ENSMUSG00000031639(Tlr3),ENSMUSG00000035299(Mid1),ENSMUSG00000037944(Ccr7),ENSMUSG00000038058(Nod1),ENSMUSG00000045322(Tlr9),ENSMUSG00000057135(Scimp)	ENSMUSG00000026883(Dab2ip),ENSMUSG00000038065(Mturn)
BP	GO:1903901	negative regulation of viral life cycle	10	0	10	81	2.20021e-06	0.000105029	ENSMUSG00000020641(Rsad2),ENSMUSG00000024079(Eif2ak2),ENSMUSG00000025492(Ifitm3),ENSMUSG00000032661(Oas3),ENSMUSG00000035692(Isg15),ENSMUSG00000036986(Pml),ENSMUSG00000039236(Isg20),ENSMUSG00000041827(Oasl1),ENSMUSG00000048806(Ifnb1),ENSMUSG00000066861(Oas1g)	-
CC	GO:0042611	MHC protein complex	6	0	6	22	2.36377e-06	0.000111941	ENSMUSG00000024610(Cd74),ENSMUSG00000035929(H2-Q4),ENSMUSG00000036594(H2-Aa),ENSMUSG00000060586(H2-Eb1),ENSMUSG00000073421(H2-Ab1),ENSMUSG00000079547(H2-DMb1)	-
BP	GO:0048525	negative regulation of viral process	11	0	11	102	2.66229e-06	0.000125086	ENSMUSG00000020641(Rsad2),ENSMUSG00000024079(Eif2ak2),ENSMUSG00000025492(Ifitm3),ENSMUSG00000032661(Oas3),ENSMUSG00000035692(Isg15),ENSMUSG00000036986(Pml),ENSMUSG00000039236(Isg20),ENSMUSG00000041827(Oasl1),ENSMUSG00000044786(Zfp36),ENSMUSG00000048806(Ifnb1),ENSMUSG00000066861(Oas1g)	-
BP	GO:0034340	response to type I interferon	8	0	8	49	2.72143e-06	0.000126865	ENSMUSG00000025492(Ifitm3),ENSMUSG00000025498(Irf7),ENSMUSG00000027514(Zbp1),ENSMUSG00000027639(Samhd1),ENSMUSG00000035692(Isg15),ENSMUSG00000048806(Ifnb1),ENSMUSG00000074151(Nlrc5),ENSMUSG00000079339(Ifit1bl1)	-
BP	GO:0032728	positive regulation of interferon-beta production	7	0	7	35	2.79829e-06	0.000129437	ENSMUSG00000017830(Dhx58),ENSMUSG00000025498(Irf7),ENSMUSG00000026896(Ifih1),ENSMUSG00000031639(Tlr3),ENSMUSG00000040296(Ddx58),ENSMUSG00000044583(Tlr7),ENSMUSG00000045322(Tlr9)	-
BP	GO:0002520	immune system development	36	4	40	1000	3.06952e-06	0.000139076	ENSMUSG00000004040(Stat3),ENSMUSG00000006310(Zbtb32),ENSMUSG00000014361(Mertk),ENSMUSG00000014773(Dll1),ENSMUSG00000015316(Slamf1),ENSMUSG00000018925(Heatr9),ENSMUSG00000020641(Rsad2),ENSMUSG00000021127(Zfp36l1),ENSMUSG00000022901(Cd86),ENSMUSG00000023206(Il15ra),ENSMUSG00000023367(Tmem176a),ENSMUSG00000024079(Eif2ak2),ENSMUSG00000024238(Zeb1),ENSMUSG00000024610(Cd74),ENSMUSG00000026770(Il2ra),EN…	ENSMUSG00000028539(Artn),ENSMUSG00000034957(Cebpa),ENSMUSG00000038065(Mturn),ENSMUSG00000056501(Cebpb)
BP	GO:0034121	regulation of toll-like receptor signaling pathway	8	1	9	66	3.0698e-06	0.000139076	ENSMUSG00000010358(Ifi35),ENSMUSG00000020641(Rsad2),ENSMUSG00000025058(Tasl),ENSMUSG00000025498(Irf7),ENSMUSG00000030921(Trim30a),ENSMUSG00000031639(Tlr3),ENSMUSG00000045322(Tlr9),ENSMUSG00000048621(Gm6377)	ENSMUSG00000026883(Dab2ip)
BP	GO:0048523	negative regulation of cellular process	106	24	130	4969	3.07659e-06	0.000139076	ENSMUSG00000000184(Ccnd2),ENSMUSG00000000247(Lhx2),ENSMUSG00000001156(Mxd1),ENSMUSG00000001552(Jup),ENSMUSG00000002227(Mov10),ENSMUSG00000002307(Daxx),ENSMUSG00000004040(Stat3),ENSMUSG00000004698(Hdac9),ENSMUSG00000006310(Zbtb32),ENSMUSG00000010358(Ifi35),ENSMUSG00000014361(Mertk),ENSMUSG00000014773(Dll1),ENSMUSG00000015222(Map2),ENSMUSG00000015316(Slamf1),ENSMUSG00000016524(Il19),ENSMUSG00000017…	ENSMUSG00000000983(Wfdc18),ENSMUSG00000001227(Sema6b),ENSMUSG00000016984(Etaa1),ENSMUSG00000023915(Tnfrsf21),ENSMUSG00000024056(Ndc80),ENSMUSG00000024186(Rgs11),ENSMUSG00000025764(Jade1),ENSMUSG00000026873(Phf19),ENSMUSG00000026883(Dab2ip),ENSMUSG00000027379(Bub1),ENSMUSG00000028933(Xrcc2),ENSMUSG00000030145(Zfp248),ENSMUSG00000033863(Klf9),ENSMUSG00000034758(Tle6),ENSMUSG00000034957(Cebpa),ENSMU…
BP	GO:0060759	regulation of response to cytokine stimulus	12	0	12	125	3.2365e-06	0.000145205	ENSMUSG00000021367(Edn1),ENSMUSG00000024610(Cd74),ENSMUSG00000025498(Irf7),ENSMUSG00000026896(Ifih1),ENSMUSG00000026981(Il1rn),ENSMUSG00000027514(Zbp1),ENSMUSG00000027639(Samhd1),ENSMUSG00000040296(Ddx58),ENSMUSG00000046879(Irgm1),ENSMUSG00000064090(Vrk2),ENSMUSG00000069874(Irgm2),ENSMUSG00000074151(Nlrc5)	-
BP	GO:0032611	interleukin-1 beta production	10	0	10	85	3.43531e-06	0.000152215	ENSMUSG00000004040(Stat3),ENSMUSG00000026535(Ifi202b),ENSMUSG00000026536(Ifi211),ENSMUSG00000036986(Pml),ENSMUSG00000037860(Aim2),ENSMUSG00000037944(Ccr7),ENSMUSG00000038058(Nod1),ENSMUSG00000054203(Ifi205),ENSMUSG00000073489(Ifi204),ENSMUSG00000079227(Ccr5)	-
BP	GO:0050792	regulation of viral process	15	0	15	196	3.45422e-06	0.000152215	ENSMUSG00000020641(Rsad2),ENSMUSG00000024079(Eif2ak2),ENSMUSG00000024610(Cd74),ENSMUSG00000025492(Ifitm3),ENSMUSG00000030921(Trim30a),ENSMUSG00000032661(Oas3),ENSMUSG00000035692(Isg15),ENSMUSG00000036986(Pml),ENSMUSG00000039236(Isg20),ENSMUSG00000041827(Oasl1),ENSMUSG00000044786(Zfp36),ENSMUSG00000048806(Ifnb1),ENSMUSG00000057596(Trim30d),ENSMUSG00000066861(Oas1g),ENSMUSG00000078616(Trim30c)	-
BP	GO:0035457	cellular response to interferon-alpha	5	0	5	14	3.48142e-06	0.000152215	ENSMUSG00000034459(Ifit1),ENSMUSG00000045932(Ifit2),ENSMUSG00000062488(Ifit3b),ENSMUSG00000073489(Ifi204),ENSMUSG00000074896(Ifit3)	-
BP	GO:0030097	hemopoiesis	34	3	37	895	3.49479e-06	0.000152215	ENSMUSG00000004040(Stat3),ENSMUSG00000006310(Zbtb32),ENSMUSG00000014361(Mertk),ENSMUSG00000014773(Dll1),ENSMUSG00000015316(Slamf1),ENSMUSG00000018925(Heatr9),ENSMUSG00000020641(Rsad2),ENSMUSG00000021127(Zfp36l1),ENSMUSG00000023206(Il15ra),ENSMUSG00000023367(Tmem176a),ENSMUSG00000024079(Eif2ak2),ENSMUSG00000024238(Zeb1),ENSMUSG00000024610(Cd74),ENSMUSG00000026770(Il2ra),ENSMUSG00000029204(Rhoh),EN…	ENSMUSG00000034957(Cebpa),ENSMUSG00000038065(Mturn),ENSMUSG00000056501(Cebpb)
BP	GO:0002274	myeloid leukocyte activation	15	1	16	222	3.57051e-06	0.000154386	ENSMUSG00000010358(Ifi35),ENSMUSG00000015316(Slamf1),ENSMUSG00000024397(Aif1),ENSMUSG00000029204(Rhoh),ENSMUSG00000030149(Klrk1),ENSMUSG00000030560(Ctsc),ENSMUSG00000031639(Tlr3),ENSMUSG00000031712(Il15),ENSMUSG00000036887(C1qa),ENSMUSG00000039699(Batf2),ENSMUSG00000044583(Tlr7),ENSMUSG00000045322(Tlr9),ENSMUSG00000048806(Ifnb1),ENSMUSG00000059089(Fcgr4),ENSMUSG00000068129(Cst7)	ENSMUSG00000034957(Cebpa)
BP	GO:0051403	stress-activated MAPK cascade	15	2	17	249	3.69817e-06	0.000158755	ENSMUSG00000012519(Mlkl),ENSMUSG00000015316(Slamf1),ENSMUSG00000021127(Zfp36l1),ENSMUSG00000021367(Edn1),ENSMUSG00000024079(Eif2ak2),ENSMUSG00000026121(Sema4c),ENSMUSG00000026981(Il1rn),ENSMUSG00000031639(Tlr3),ENSMUSG00000035299(Mid1),ENSMUSG00000037944(Ccr7),ENSMUSG00000038058(Nod1),ENSMUSG00000042901(Aida),ENSMUSG00000044786(Zfp36),ENSMUSG00000045322(Tlr9),ENSMUSG00000057135(Scimp)	ENSMUSG00000026883(Dab2ip),ENSMUSG00000038065(Mturn)
BP	GO:0051250	negative regulation of lymphocyte activation	11	2	13	150	3.98519e-06	0.000169854	ENSMUSG00000014361(Mertk),ENSMUSG00000022876(Samsn1),ENSMUSG00000022901(Cd86),ENSMUSG00000024610(Cd74),ENSMUSG00000026770(Il2ra),ENSMUSG00000031628(Casp3),ENSMUSG00000036594(H2-Aa),ENSMUSG00000039899(Fgl2),ENSMUSG00000048806(Ifnb1),ENSMUSG00000073421(H2-Ab1),ENSMUSG00000078763(Slfn1)	ENSMUSG00000023915(Tnfrsf21),ENSMUSG00000056501(Cebpb)
BP	GO:0007159	leukocyte cell-cell adhesion	18	2	20	335	4.0771e-06	0.000172539	ENSMUSG00000015316(Slamf1),ENSMUSG00000020717(Pecam1),ENSMUSG00000022901(Cd86),ENSMUSG00000024397(Aif1),ENSMUSG00000024610(Cd74),ENSMUSG00000026581(Sell),ENSMUSG00000026770(Il2ra),ENSMUSG00000029204(Rhoh),ENSMUSG00000031628(Casp3),ENSMUSG00000031712(Il15),ENSMUSG00000036594(H2-Aa),ENSMUSG00000037944(Ccr7),ENSMUSG00000039899(Fgl2),ENSMUSG00000048806(Ifnb1),ENSMUSG00000073421(H2-Ab1),ENSMUSG0000007…	ENSMUSG00000023915(Tnfrsf21),ENSMUSG00000056501(Cebpb)
BP	GO:0048534	hematopoietic or lymphoid organ development	34	4	38	939	4.20874e-06	0.000176856	ENSMUSG00000004040(Stat3),ENSMUSG00000006310(Zbtb32),ENSMUSG00000014361(Mertk),ENSMUSG00000014773(Dll1),ENSMUSG00000015316(Slamf1),ENSMUSG00000018925(Heatr9),ENSMUSG00000020641(Rsad2),ENSMUSG00000021127(Zfp36l1),ENSMUSG00000023206(Il15ra),ENSMUSG00000023367(Tmem176a),ENSMUSG00000024079(Eif2ak2),ENSMUSG00000024238(Zeb1),ENSMUSG00000024610(Cd74),ENSMUSG00000026770(Il2ra),ENSMUSG00000029204(Rhoh),EN…	ENSMUSG00000028539(Artn),ENSMUSG00000034957(Cebpa),ENSMUSG00000038065(Mturn),ENSMUSG00000056501(Cebpb)
BP	GO:0051239	regulation of multicellular organismal process	79	13	92	3213	4.80757e-06	0.000200607	ENSMUSG00000000247(Lhx2),ENSMUSG00000001552(Jup),ENSMUSG00000001768(Rin2),ENSMUSG00000002227(Mov10),ENSMUSG00000004040(Stat3),ENSMUSG00000004698(Hdac9),ENSMUSG00000006310(Zbtb32),ENSMUSG00000014361(Mertk),ENSMUSG00000014773(Dll1),ENSMUSG00000015222(Map2),ENSMUSG00000015316(Slamf1),ENSMUSG00000016524(Il19),ENSMUSG00000017830(Dhx58),ENSMUSG00000020641(Rsad2),ENSMUSG00000021127(Zfp36l1),ENSMUSG00000…	ENSMUSG00000001227(Sema6b),ENSMUSG00000022494(Shisa9),ENSMUSG00000023915(Tnfrsf21),ENSMUSG00000026883(Dab2ip),ENSMUSG00000028933(Xrcc2),ENSMUSG00000034758(Tle6),ENSMUSG00000034957(Cebpa),ENSMUSG00000036867(Smad6),ENSMUSG00000037098(Rab11fip3),ENSMUSG00000038065(Mturn),ENSMUSG00000042745(Id1),ENSMUSG00000052934(Fbxo31),ENSMUSG00000056501(Cebpb)
BP	GO:0002695	negative regulation of leukocyte activation	12	2	14	181	6.46129e-06	0.00026774	ENSMUSG00000014361(Mertk),ENSMUSG00000022876(Samsn1),ENSMUSG00000022901(Cd86),ENSMUSG00000024610(Cd74),ENSMUSG00000026770(Il2ra),ENSMUSG00000031628(Casp3),ENSMUSG00000036594(H2-Aa),ENSMUSG00000039899(Fgl2),ENSMUSG00000048806(Ifnb1),ENSMUSG00000068129(Cst7),ENSMUSG00000073421(H2-Ab1),ENSMUSG00000078763(Slfn1)	ENSMUSG00000023915(Tnfrsf21),ENSMUSG00000056501(Cebpb)
BP	GO:0048519	negative regulation of biological process	112	26	138	5434	6.60455e-06	0.000271789	ENSMUSG00000000184(Ccnd2),ENSMUSG00000000247(Lhx2),ENSMUSG00000001156(Mxd1),ENSMUSG00000001552(Jup),ENSMUSG00000002227(Mov10),ENSMUSG00000002307(Daxx),ENSMUSG00000004040(Stat3),ENSMUSG00000004698(Hdac9),ENSMUSG00000006310(Zbtb32),ENSMUSG00000010358(Ifi35),ENSMUSG00000014361(Mertk),ENSMUSG00000014773(Dll1),ENSMUSG00000015222(Map2),ENSMUSG00000015316(Slamf1),ENSMUSG00000016524(Il19),ENSMUSG00000017…	ENSMUSG00000000983(Wfdc18),ENSMUSG00000001227(Sema6b),ENSMUSG00000016984(Etaa1),ENSMUSG00000023915(Tnfrsf21),ENSMUSG00000024056(Ndc80),ENSMUSG00000024186(Rgs11),ENSMUSG00000025764(Jade1),ENSMUSG00000026873(Phf19),ENSMUSG00000026883(Dab2ip),ENSMUSG00000027379(Bub1),ENSMUSG00000028933(Xrcc2),ENSMUSG00000030145(Zfp248),ENSMUSG00000031671(Setd6),ENSMUSG00000033863(Klf9),ENSMUSG00000034758(Tle6),ENSMU…
BP	GO:0062208	positive regulation of pattern recognition receptor signaling pathway	7	0	7	40	7.17145e-06	0.000293096	ENSMUSG00000010358(Ifi35),ENSMUSG00000017830(Dhx58),ENSMUSG00000020641(Rsad2),ENSMUSG00000025058(Tasl),ENSMUSG00000031639(Tlr3),ENSMUSG00000037921(Ddx60),ENSMUSG00000045322(Tlr9)	-
BP	GO:0042116	macrophage activation	9	1	10	93	7.79258e-06	0.000314195	ENSMUSG00000010358(Ifi35),ENSMUSG00000024397(Aif1),ENSMUSG00000030560(Ctsc),ENSMUSG00000031639(Tlr3),ENSMUSG00000036887(C1qa),ENSMUSG00000044583(Tlr7),ENSMUSG00000045322(Tlr9),ENSMUSG00000048806(Ifnb1),ENSMUSG00000068129(Cst7)	ENSMUSG00000034957(Cebpa)
BP	GO:0070663	regulation of leukocyte proliferation	14	2	16	236	7.793e-06	0.000314195	ENSMUSG00000015316(Slamf1),ENSMUSG00000022901(Cd86),ENSMUSG00000024397(Aif1),ENSMUSG00000024610(Cd74),ENSMUSG00000026770(Il2ra),ENSMUSG00000031628(Casp3),ENSMUSG00000031712(Il15),ENSMUSG00000035352(Ccl12),ENSMUSG00000036594(H2-Aa),ENSMUSG00000037944(Ccr7),ENSMUSG00000044701(Il27),ENSMUSG00000045322(Tlr9),ENSMUSG00000073421(H2-Ab1),ENSMUSG00000078763(Slfn1)	ENSMUSG00000023915(Tnfrsf21),ENSMUSG00000056501(Cebpb)
BP	GO:0031098	stress-activated protein kinase signaling cascade	15	2	17	264	8.05429e-06	0.00032255	ENSMUSG00000012519(Mlkl),ENSMUSG00000015316(Slamf1),ENSMUSG00000021127(Zfp36l1),ENSMUSG00000021367(Edn1),ENSMUSG00000024079(Eif2ak2),ENSMUSG00000026121(Sema4c),ENSMUSG00000026981(Il1rn),ENSMUSG00000031639(Tlr3),ENSMUSG00000035299(Mid1),ENSMUSG00000037944(Ccr7),ENSMUSG00000038058(Nod1),ENSMUSG00000042901(Aida),ENSMUSG00000044786(Zfp36),ENSMUSG00000045322(Tlr9),ENSMUSG00000057135(Scimp)	ENSMUSG00000026883(Dab2ip),ENSMUSG00000038065(Mturn)
BP	GO:0050868	negative regulation of T cell activation	9	2	11	116	9.35277e-06	0.000372053	ENSMUSG00000022901(Cd86),ENSMUSG00000024610(Cd74),ENSMUSG00000026770(Il2ra),ENSMUSG00000031628(Casp3),ENSMUSG00000036594(H2-Aa),ENSMUSG00000039899(Fgl2),ENSMUSG00000048806(Ifnb1),ENSMUSG00000073421(H2-Ab1),ENSMUSG00000078763(Slfn1)	ENSMUSG00000023915(Tnfrsf21),ENSMUSG00000056501(Cebpb)
BP	GO:0051240	positive regulation of multicellular organismal process	53	8	61	1897	9.70981e-06	0.000383698	ENSMUSG00000001552(Jup),ENSMUSG00000001768(Rin2),ENSMUSG00000004040(Stat3),ENSMUSG00000004698(Hdac9),ENSMUSG00000014773(Dll1),ENSMUSG00000015316(Slamf1),ENSMUSG00000017830(Dhx58),ENSMUSG00000020641(Rsad2),ENSMUSG00000021127(Zfp36l1),ENSMUSG00000021367(Edn1),ENSMUSG00000023206(Il15ra),ENSMUSG00000023961(Enpp4),ENSMUSG00000024079(Eif2ak2),ENSMUSG00000024238(Zeb1),ENSMUSG00000024397(Aif1),ENSMUSG000…	ENSMUSG00000026883(Dab2ip),ENSMUSG00000028933(Xrcc2),ENSMUSG00000034758(Tle6),ENSMUSG00000034957(Cebpa),ENSMUSG00000036867(Smad6),ENSMUSG00000038065(Mturn),ENSMUSG00000052934(Fbxo31),ENSMUSG00000056501(Cebpb)
BP	GO:0044406	adhesion of symbiont to host	5	0	5	17	1.02843e-05	0.000403728	ENSMUSG00000028268(Gbp3),ENSMUSG00000028270(Gbp2),ENSMUSG00000029298(Gbp9),ENSMUSG00000040253(Gbp7),ENSMUSG00000104713(Gbp6)	-
BP	GO:1903037	regulation of leukocyte cell-cell adhesion	16	2	18	299	1.10349e-05	0.000430363	ENSMUSG00000015316(Slamf1),ENSMUSG00000022901(Cd86),ENSMUSG00000024397(Aif1),ENSMUSG00000024610(Cd74),ENSMUSG00000026770(Il2ra),ENSMUSG00000029204(Rhoh),ENSMUSG00000031628(Casp3),ENSMUSG00000031712(Il15),ENSMUSG00000036594(H2-Aa),ENSMUSG00000037944(Ccr7),ENSMUSG00000039899(Fgl2),ENSMUSG00000048806(Ifnb1),ENSMUSG00000073421(H2-Ab1),ENSMUSG00000078763(Slfn1),ENSMUSG00000095028(Sirpb1b),ENSMUSG00000…	ENSMUSG00000023915(Tnfrsf21),ENSMUSG00000056501(Cebpb)
BP	GO:0050670	regulation of lymphocyte proliferation	13	2	15	216	1.12354e-05	0.000435336	ENSMUSG00000015316(Slamf1),ENSMUSG00000022901(Cd86),ENSMUSG00000024397(Aif1),ENSMUSG00000024610(Cd74),ENSMUSG00000026770(Il2ra),ENSMUSG00000031628(Casp3),ENSMUSG00000031712(Il15),ENSMUSG00000036594(H2-Aa),ENSMUSG00000037944(Ccr7),ENSMUSG00000044701(Il27),ENSMUSG00000045322(Tlr9),ENSMUSG00000073421(H2-Ab1),ENSMUSG00000078763(Slfn1)	ENSMUSG00000023915(Tnfrsf21),ENSMUSG00000056501(Cebpb)
BP	GO:0032652	regulation of interleukin-1 production	10	0	10	97	1.13701e-05	0.000437711	ENSMUSG00000004040(Stat3),ENSMUSG00000026535(Ifi202b),ENSMUSG00000026536(Ifi211),ENSMUSG00000036986(Pml),ENSMUSG00000037860(Aim2),ENSMUSG00000037944(Ccr7),ENSMUSG00000038058(Nod1),ENSMUSG00000054203(Ifi205),ENSMUSG00000073489(Ifi204),ENSMUSG00000079227(Ccr5)	-
BP	GO:0019220	regulation of phosphate metabolic process	51	7	58	1783	1.18622e-05	0.000453731	ENSMUSG00000000184(Ccnd2),ENSMUSG00000002307(Daxx),ENSMUSG00000004040(Stat3),ENSMUSG00000009185(Ccl8),ENSMUSG00000012519(Mlkl),ENSMUSG00000014361(Mertk),ENSMUSG00000015316(Slamf1),ENSMUSG00000015947(Fcgr1),ENSMUSG00000020717(Pecam1),ENSMUSG00000021367(Edn1),ENSMUSG00000022876(Samsn1),ENSMUSG00000022901(Cd86),ENSMUSG00000024079(Eif2ak2),ENSMUSG00000024397(Aif1),ENSMUSG00000024610(Cd74),ENSMUSG0000…	ENSMUSG00000016984(Etaa1),ENSMUSG00000026409(Pfkfb2),ENSMUSG00000026883(Dab2ip),ENSMUSG00000036867(Smad6),ENSMUSG00000038065(Mturn),ENSMUSG00000042745(Id1),ENSMUSG00000072082(Ccnf)
BP	GO:0051174	regulation of phosphorus metabolic process	51	7	58	1784	1.20604e-05	0.000458372	ENSMUSG00000000184(Ccnd2),ENSMUSG00000002307(Daxx),ENSMUSG00000004040(Stat3),ENSMUSG00000009185(Ccl8),ENSMUSG00000012519(Mlkl),ENSMUSG00000014361(Mertk),ENSMUSG00000015316(Slamf1),ENSMUSG00000015947(Fcgr1),ENSMUSG00000020717(Pecam1),ENSMUSG00000021367(Edn1),ENSMUSG00000022876(Samsn1),ENSMUSG00000022901(Cd86),ENSMUSG00000024079(Eif2ak2),ENSMUSG00000024397(Aif1),ENSMUSG00000024610(Cd74),ENSMUSG0000…	ENSMUSG00000016984(Etaa1),ENSMUSG00000026409(Pfkfb2),ENSMUSG00000026883(Dab2ip),ENSMUSG00000036867(Smad6),ENSMUSG00000038065(Mturn),ENSMUSG00000042745(Id1),ENSMUSG00000072082(Ccnf)
BP	GO:0070661	leukocyte proliferation	16	3	19	332	1.29127e-05	0.000486371	ENSMUSG00000006310(Zbtb32),ENSMUSG00000015316(Slamf1),ENSMUSG00000022901(Cd86),ENSMUSG00000024397(Aif1),ENSMUSG00000024610(Cd74),ENSMUSG00000026770(Il2ra),ENSMUSG00000031628(Casp3),ENSMUSG00000031712(Il15),ENSMUSG00000035352(Ccl12),ENSMUSG00000036594(H2-Aa),ENSMUSG00000037944(Ccr7),ENSMUSG00000044701(Il27),ENSMUSG00000045322(Tlr9),ENSMUSG00000048806(Ifnb1),ENSMUSG00000073421(H2-Ab1),ENSMUSG000000…	ENSMUSG00000023915(Tnfrsf21),ENSMUSG00000046006(Gapt),ENSMUSG00000056501(Cebpb)
BP	GO:0048002	antigen processing and presentation of peptide antigen	8	0	8	60	1.29601e-05	0.000486371	ENSMUSG00000015947(Fcgr1),ENSMUSG00000024610(Cd74),ENSMUSG00000035929(H2-Q4),ENSMUSG00000036594(H2-Aa),ENSMUSG00000037321(Tap1),ENSMUSG00000053835(H2-T24),ENSMUSG00000056116(H2-T22),ENSMUSG00000073421(H2-Ab1)	-
BP	GO:0032944	regulation of mononuclear cell proliferation	13	2	15	219	1.32429e-05	0.000493879	ENSMUSG00000015316(Slamf1),ENSMUSG00000022901(Cd86),ENSMUSG00000024397(Aif1),ENSMUSG00000024610(Cd74),ENSMUSG00000026770(Il2ra),ENSMUSG00000031628(Casp3),ENSMUSG00000031712(Il15),ENSMUSG00000036594(H2-Aa),ENSMUSG00000037944(Ccr7),ENSMUSG00000044701(Il27),ENSMUSG00000045322(Tlr9),ENSMUSG00000073421(H2-Ab1),ENSMUSG00000078763(Slfn1)	ENSMUSG00000023915(Tnfrsf21),ENSMUSG00000056501(Cebpb)
BP	GO:0042129	regulation of T cell proliferation	11	2	13	168	1.37267e-05	0.000500597	ENSMUSG00000015316(Slamf1),ENSMUSG00000022901(Cd86),ENSMUSG00000024397(Aif1),ENSMUSG00000026770(Il2ra),ENSMUSG00000031628(Casp3),ENSMUSG00000031712(Il15),ENSMUSG00000036594(H2-Aa),ENSMUSG00000037944(Ccr7),ENSMUSG00000044701(Il27),ENSMUSG00000073421(H2-Ab1),ENSMUSG00000078763(Slfn1)	ENSMUSG00000023915(Tnfrsf21),ENSMUSG00000056501(Cebpb)
BP	GO:0046651	lymphocyte proliferation	15	3	18	304	1.38105e-05	0.000500597	ENSMUSG00000006310(Zbtb32),ENSMUSG00000015316(Slamf1),ENSMUSG00000022901(Cd86),ENSMUSG00000024397(Aif1),ENSMUSG00000024610(Cd74),ENSMUSG00000026770(Il2ra),ENSMUSG00000031628(Casp3),ENSMUSG00000031712(Il15),ENSMUSG00000036594(H2-Aa),ENSMUSG00000037944(Ccr7),ENSMUSG00000044701(Il27),ENSMUSG00000045322(Tlr9),ENSMUSG00000048806(Ifnb1),ENSMUSG00000073421(H2-Ab1),ENSMUSG00000078763(Slfn1)	ENSMUSG00000023915(Tnfrsf21),ENSMUSG00000046006(Gapt),ENSMUSG00000056501(Cebpb)
BP	GO:0001774	microglial cell activation	7	0	7	44	1.38425e-05	0.000500597	ENSMUSG00000024397(Aif1),ENSMUSG00000030560(Ctsc),ENSMUSG00000031639(Tlr3),ENSMUSG00000036887(C1qa),ENSMUSG00000044583(Tlr7),ENSMUSG00000045322(Tlr9),ENSMUSG00000068129(Cst7)	-
BP	GO:0002269	leukocyte activation involved in inflammatory response	7	0	7	44	1.38425e-05	0.000500597	ENSMUSG00000024397(Aif1),ENSMUSG00000030560(Ctsc),ENSMUSG00000031639(Tlr3),ENSMUSG00000036887(C1qa),ENSMUSG00000044583(Tlr7),ENSMUSG00000045322(Tlr9),ENSMUSG00000068129(Cst7)	-
BP	GO:0071357	cellular response to type I interferon	7	0	7	44	1.38425e-05	0.000500597	ENSMUSG00000025492(Ifitm3),ENSMUSG00000025498(Irf7),ENSMUSG00000027514(Zbp1),ENSMUSG00000027639(Samhd1),ENSMUSG00000048806(Ifnb1),ENSMUSG00000074151(Nlrc5),ENSMUSG00000079339(Ifit1bl1)	-
BP	GO:1990266	neutrophil migration	11	0	11	122	1.51444e-05	0.000544376	ENSMUSG00000009185(Ccl8),ENSMUSG00000020717(Pecam1),ENSMUSG00000021367(Edn1),ENSMUSG00000024610(Cd74),ENSMUSG00000026581(Sell),ENSMUSG00000029204(Rhoh),ENSMUSG00000029417(Cxcl9),ENSMUSG00000034855(Cxcl10),ENSMUSG00000035352(Ccl12),ENSMUSG00000037944(Ccr7),ENSMUSG00000048534(Jaml)	-
BP	GO:0032943	mononuclear cell proliferation	15	3	18	307	1.57615e-05	0.000563167	ENSMUSG00000006310(Zbtb32),ENSMUSG00000015316(Slamf1),ENSMUSG00000022901(Cd86),ENSMUSG00000024397(Aif1),ENSMUSG00000024610(Cd74),ENSMUSG00000026770(Il2ra),ENSMUSG00000031628(Casp3),ENSMUSG00000031712(Il15),ENSMUSG00000036594(H2-Aa),ENSMUSG00000037944(Ccr7),ENSMUSG00000044701(Il27),ENSMUSG00000045322(Tlr9),ENSMUSG00000048806(Ifnb1),ENSMUSG00000073421(H2-Ab1),ENSMUSG00000078763(Slfn1)	ENSMUSG00000023915(Tnfrsf21),ENSMUSG00000046006(Gapt),ENSMUSG00000056501(Cebpb)
BP	GO:0071396	cellular response to lipid	23	4	27	597	1.63002e-05	0.000578369	ENSMUSG00000002307(Daxx),ENSMUSG00000020638(Cmpk2),ENSMUSG00000021127(Zfp36l1),ENSMUSG00000021367(Edn1),ENSMUSG00000021423(Ly86),ENSMUSG00000022901(Cd86),ENSMUSG00000028270(Gbp2),ENSMUSG00000029417(Cxcl9),ENSMUSG00000030149(Klrk1),ENSMUSG00000031712(Il15),ENSMUSG00000033871(Ppargc1b),ENSMUSG00000034855(Cxcl10),ENSMUSG00000035352(Ccl12),ENSMUSG00000037447(Arid5a),ENSMUSG00000041515(Irf8),ENSMUSG00…	ENSMUSG00000025931(Paqr8),ENSMUSG00000026883(Dab2ip),ENSMUSG00000033863(Klf9),ENSMUSG00000056501(Cebpb)
BP	GO:0002521	leukocyte differentiation	24	2	26	563	1.63808e-05	0.000578369	ENSMUSG00000004040(Stat3),ENSMUSG00000014361(Mertk),ENSMUSG00000014773(Dll1),ENSMUSG00000015316(Slamf1),ENSMUSG00000020641(Rsad2),ENSMUSG00000021127(Zfp36l1),ENSMUSG00000023206(Il15ra),ENSMUSG00000023367(Tmem176a),ENSMUSG00000024238(Zeb1),ENSMUSG00000024610(Cd74),ENSMUSG00000026770(Il2ra),ENSMUSG00000029204(Rhoh),ENSMUSG00000029810(Tmem176b),ENSMUSG00000031712(Il15),ENSMUSG00000033871(Ppargc1b),E…	ENSMUSG00000034957(Cebpa),ENSMUSG00000056501(Cebpb)
BP	GO:0032479	regulation of type I interferon production	9	0	9	81	1.70045e-05	0.000593366	ENSMUSG00000017830(Dhx58),ENSMUSG00000025498(Irf7),ENSMUSG00000026896(Ifih1),ENSMUSG00000031639(Tlr3),ENSMUSG00000040296(Ddx58),ENSMUSG00000041515(Irf8),ENSMUSG00000044583(Tlr7),ENSMUSG00000045322(Tlr9),ENSMUSG00000079363(Gbp4)	-
BP	GO:0032606	type I interferon production	9	0	9	81	1.70045e-05	0.000593366	ENSMUSG00000017830(Dhx58),ENSMUSG00000025498(Irf7),ENSMUSG00000026896(Ifih1),ENSMUSG00000031639(Tlr3),ENSMUSG00000040296(Ddx58),ENSMUSG00000041515(Irf8),ENSMUSG00000044583(Tlr7),ENSMUSG00000045322(Tlr9),ENSMUSG00000079363(Gbp4)	-
MF	GO:0043167	ion binding	119	28	147	6127	1.8977e-05	0.000658349	ENSMUSG00000000247(Lhx2),ENSMUSG00000002104(Rapsn),ENSMUSG00000002227(Mov10),ENSMUSG00000003617(Cp),ENSMUSG00000004698(Hdac9),ENSMUSG00000005237(Dnah2),ENSMUSG00000006310(Zbtb32),ENSMUSG00000009185(Ccl8),ENSMUSG00000012519(Mlkl),ENSMUSG00000014361(Mertk),ENSMUSG00000014773(Dll1),ENSMUSG00000016624(Phf21b),ENSMUSG00000017830(Dhx58),ENSMUSG00000019979(Apaf1),ENSMUSG00000019990(Pde7b),ENSMUSG0000002…	ENSMUSG00000002769(Gnmt),ENSMUSG00000009566(Fpgs),ENSMUSG00000022474(Pmm1),ENSMUSG00000022621(Rabl2),ENSMUSG00000025764(Jade1),ENSMUSG00000026409(Pfkfb2),ENSMUSG00000026575(Nme7),ENSMUSG00000026785(Pkn3),ENSMUSG00000026873(Phf19),ENSMUSG00000026883(Dab2ip),ENSMUSG00000027379(Bub1),ENSMUSG00000027999(Pla2g12a),ENSMUSG00000028933(Xrcc2),ENSMUSG00000030145(Zfp248),ENSMUSG00000032456(Nmnat3),ENSMUSG0…
BP	GO:0050866	negative regulation of cell activation	12	2	14	200	2.01036e-05	0.000693399	ENSMUSG00000014361(Mertk),ENSMUSG00000022876(Samsn1),ENSMUSG00000022901(Cd86),ENSMUSG00000024610(Cd74),ENSMUSG00000026770(Il2ra),ENSMUSG00000031628(Casp3),ENSMUSG00000036594(H2-Aa),ENSMUSG00000039899(Fgl2),ENSMUSG00000048806(Ifnb1),ENSMUSG00000068129(Cst7),ENSMUSG00000073421(H2-Ab1),ENSMUSG00000078763(Slfn1)	ENSMUSG00000023915(Tnfrsf21),ENSMUSG00000056501(Cebpb)
BP	GO:0032872	regulation of stress-activated MAPK cascade	13	2	15	227	2.02349e-05	0.000693916	ENSMUSG00000012519(Mlkl),ENSMUSG00000015316(Slamf1),ENSMUSG00000021367(Edn1),ENSMUSG00000024079(Eif2ak2),ENSMUSG00000026121(Sema4c),ENSMUSG00000026981(Il1rn),ENSMUSG00000031639(Tlr3),ENSMUSG00000035299(Mid1),ENSMUSG00000037944(Ccr7),ENSMUSG00000038058(Nod1),ENSMUSG00000042901(Aida),ENSMUSG00000045322(Tlr9),ENSMUSG00000057135(Scimp)	ENSMUSG00000026883(Dab2ip),ENSMUSG00000038065(Mturn)
BP	GO:0016310	phosphorylation	59	10	69	2291	2.05353e-05	0.000700195	ENSMUSG00000000184(Ccnd2),ENSMUSG00000002307(Daxx),ENSMUSG00000004040(Stat3),ENSMUSG00000009185(Ccl8),ENSMUSG00000012519(Mlkl),ENSMUSG00000014361(Mertk),ENSMUSG00000015316(Slamf1),ENSMUSG00000015947(Fcgr1),ENSMUSG00000020638(Cmpk2),ENSMUSG00000020717(Pecam1),ENSMUSG00000021127(Zfp36l1),ENSMUSG00000021367(Edn1),ENSMUSG00000022876(Samsn1),ENSMUSG00000022901(Cd86),ENSMUSG00000024079(Eif2ak2),ENSMUSG…	ENSMUSG00000016984(Etaa1),ENSMUSG00000026409(Pfkfb2),ENSMUSG00000026575(Nme7),ENSMUSG00000026785(Pkn3),ENSMUSG00000026883(Dab2ip),ENSMUSG00000027379(Bub1),ENSMUSG00000036867(Smad6),ENSMUSG00000038065(Mturn),ENSMUSG00000042745(Id1),ENSMUSG00000072082(Ccnf)
BP	GO:0097530	granulocyte migration	12	0	12	150	2.10529e-05	0.000706319	ENSMUSG00000009185(Ccl8),ENSMUSG00000015316(Slamf1),ENSMUSG00000020717(Pecam1),ENSMUSG00000021367(Edn1),ENSMUSG00000024610(Cd74),ENSMUSG00000026581(Sell),ENSMUSG00000029204(Rhoh),ENSMUSG00000029417(Cxcl9),ENSMUSG00000034855(Cxcl10),ENSMUSG00000035352(Ccl12),ENSMUSG00000037944(Ccr7),ENSMUSG00000048534(Jaml)	-
BP	GO:0032612	interleukin-1 production	10	0	10	104	2.1073e-05	0.000706319	ENSMUSG00000004040(Stat3),ENSMUSG00000026535(Ifi202b),ENSMUSG00000026536(Ifi211),ENSMUSG00000036986(Pml),ENSMUSG00000037860(Aim2),ENSMUSG00000037944(Ccr7),ENSMUSG00000038058(Nod1),ENSMUSG00000054203(Ifi205),ENSMUSG00000073489(Ifi204),ENSMUSG00000079227(Ccr5)	-
BP	GO:0032649	regulation of interferon-gamma production	10	0	10	104	2.1073e-05	0.000706319	ENSMUSG00000015316(Slamf1),ENSMUSG00000030149(Klrk1),ENSMUSG00000031639(Tlr3),ENSMUSG00000035692(Isg15),ENSMUSG00000037447(Arid5a),ENSMUSG00000037944(Ccr7),ENSMUSG00000041515(Irf8),ENSMUSG00000044583(Tlr7),ENSMUSG00000044701(Il27),ENSMUSG00000045322(Tlr9)	-
BP	GO:0002604	regulation of dendritic cell antigen processing and presentation	4	0	4	10	2.11884e-05	0.000706319	ENSMUSG00000024610(Cd74),ENSMUSG00000037944(Ccr7),ENSMUSG00000038058(Nod1),ENSMUSG00000039899(Fgl2)	-
BP	GO:0008219	cell death	55	9	64	2076	2.13658e-05	0.000708276	ENSMUSG00000000184(Ccnd2),ENSMUSG00000002104(Rapsn),ENSMUSG00000002307(Daxx),ENSMUSG00000004040(Stat3),ENSMUSG00000012519(Mlkl),ENSMUSG00000014361(Mertk),ENSMUSG00000014773(Dll1),ENSMUSG00000016524(Il19),ENSMUSG00000019979(Apaf1),ENSMUSG00000021127(Zfp36l1),ENSMUSG00000021367(Edn1),ENSMUSG00000022684(Bfar),ENSMUSG00000022938(Fam3b),ENSMUSG00000024079(Eif2ak2),ENSMUSG00000024397(Aif1),ENSMUSG00000…	ENSMUSG00000023915(Tnfrsf21),ENSMUSG00000025764(Jade1),ENSMUSG00000026883(Dab2ip),ENSMUSG00000028933(Xrcc2),ENSMUSG00000036867(Smad6),ENSMUSG00000042745(Id1),ENSMUSG00000043866(Taf10),ENSMUSG00000048232(Fbxo10),ENSMUSG00000056501(Cebpb)
BP	GO:1903038	negative regulation of leukocyte cell-cell adhesion	9	2	11	127	2.21316e-05	0.000728622	ENSMUSG00000022901(Cd86),ENSMUSG00000024610(Cd74),ENSMUSG00000026770(Il2ra),ENSMUSG00000031628(Casp3),ENSMUSG00000036594(H2-Aa),ENSMUSG00000039899(Fgl2),ENSMUSG00000048806(Ifnb1),ENSMUSG00000073421(H2-Ab1),ENSMUSG00000078763(Slfn1)	ENSMUSG00000023915(Tnfrsf21),ENSMUSG00000056501(Cebpb)
BP	GO:0042742	defense response to bacterium	16	2	18	315	2.22238e-05	0.000728622	ENSMUSG00000015947(Fcgr1),ENSMUSG00000028268(Gbp3),ENSMUSG00000028270(Gbp2),ENSMUSG00000029298(Gbp9),ENSMUSG00000030149(Klrk1),ENSMUSG00000035692(Isg15),ENSMUSG00000038058(Nod1),ENSMUSG00000040253(Gbp7),ENSMUSG00000041515(Irf8),ENSMUSG00000045322(Tlr9),ENSMUSG00000048806(Ifnb1),ENSMUSG00000054072(Iigp1),ENSMUSG00000069874(Irgm2),ENSMUSG00000079363(Gbp4),ENSMUSG00000104713(Gbp6),ENSMUSG00000105096…	ENSMUSG00000000983(Wfdc18),ENSMUSG00000056501(Cebpb)
BP	GO:0002718	regulation of cytokine production involved in immune response	9	0	9	84	2.28676e-05	0.000745635	ENSMUSG00000015316(Slamf1),ENSMUSG00000020641(Rsad2),ENSMUSG00000024610(Cd74),ENSMUSG00000031639(Tlr3),ENSMUSG00000037447(Arid5a),ENSMUSG00000040296(Ddx58),ENSMUSG00000045322(Tlr9),ENSMUSG00000048806(Ifnb1),ENSMUSG00000057135(Scimp)	-
BP	GO:0070302	regulation of stress-activated protein kinase signaling cascade	13	2	15	230	2.35989e-05	0.000765297	ENSMUSG00000012519(Mlkl),ENSMUSG00000015316(Slamf1),ENSMUSG00000021367(Edn1),ENSMUSG00000024079(Eif2ak2),ENSMUSG00000026121(Sema4c),ENSMUSG00000026981(Il1rn),ENSMUSG00000031639(Tlr3),ENSMUSG00000035299(Mid1),ENSMUSG00000037944(Ccr7),ENSMUSG00000038058(Nod1),ENSMUSG00000042901(Aida),ENSMUSG00000045322(Tlr9),ENSMUSG00000057135(Scimp)	ENSMUSG00000026883(Dab2ip),ENSMUSG00000038065(Mturn)
BP	GO:0002460	adaptive immune response based on somatic recombination of immune receptors built from immunoglobulin superfamily domains	16	0	16	259	2.4735e-05	0.000792801	ENSMUSG00000004040(Stat3),ENSMUSG00000015316(Slamf1),ENSMUSG00000015947(Fcgr1),ENSMUSG00000020641(Rsad2),ENSMUSG00000024610(Cd74),ENSMUSG00000025498(Irf7),ENSMUSG00000030560(Ctsc),ENSMUSG00000036887(C1qa),ENSMUSG00000036905(C1qb),ENSMUSG00000037447(Arid5a),ENSMUSG00000037944(Ccr7),ENSMUSG00000044701(Il27),ENSMUSG00000048806(Ifnb1),ENSMUSG00000070427(Il18bp),ENSMUSG00000073418(C4b),ENSMUSG00000073…	-
BP	GO:0008285	negative regulation of cell population proliferation	22	7	29	682	2.48246e-05	0.000792801	ENSMUSG00000004040(Stat3),ENSMUSG00000010358(Ifi35),ENSMUSG00000014773(Dll1),ENSMUSG00000018986(Slfn3),ENSMUSG00000020415(Pttg1),ENSMUSG00000022901(Cd86),ENSMUSG00000024079(Eif2ak2),ENSMUSG00000024238(Zeb1),ENSMUSG00000024397(Aif1),ENSMUSG00000025492(Ifitm3),ENSMUSG00000026770(Il2ra),ENSMUSG00000031628(Casp3),ENSMUSG00000031712(Il15),ENSMUSG00000034329(Brip1),ENSMUSG00000035352(Ccl12),ENSMUSG0000…	ENSMUSG00000023915(Tnfrsf21),ENSMUSG00000026883(Dab2ip),ENSMUSG00000033863(Klf9),ENSMUSG00000034957(Cebpa),ENSMUSG00000036867(Smad6),ENSMUSG00000056501(Cebpb),ENSMUSG00000069272(H2ac8)
BP	GO:0048518	positive regulation of biological process	128	20	148	6072	2.495e-05	0.000792801	ENSMUSG00000000184(Ccnd2),ENSMUSG00000000247(Lhx2),ENSMUSG00000001128(Cfp),ENSMUSG00000001552(Jup),ENSMUSG00000001768(Rin2),ENSMUSG00000002104(Rapsn),ENSMUSG00000002227(Mov10),ENSMUSG00000002307(Daxx),ENSMUSG00000004040(Stat3),ENSMUSG00000004698(Hdac9),ENSMUSG00000009185(Ccl8),ENSMUSG00000010358(Ifi35),ENSMUSG00000012519(Mlkl),ENSMUSG00000014361(Mertk),ENSMUSG00000014773(Dll1),ENSMUSG00000015222(…	ENSMUSG00000001227(Sema6b),ENSMUSG00000016984(Etaa1),ENSMUSG00000023915(Tnfrsf21),ENSMUSG00000024056(Ndc80),ENSMUSG00000025764(Jade1),ENSMUSG00000026409(Pfkfb2),ENSMUSG00000026873(Phf19),ENSMUSG00000026883(Dab2ip),ENSMUSG00000028539(Artn),ENSMUSG00000028933(Xrcc2),ENSMUSG00000034758(Tle6),ENSMUSG00000034957(Cebpa),ENSMUSG00000036867(Smad6),ENSMUSG00000038065(Mturn),ENSMUSG00000038797(Zscan2),ENSM…
BP	GO:0001961	positive regulation of cytokine-mediated signaling pathway	7	0	7	48	2.49785e-05	0.000792801	ENSMUSG00000021367(Edn1),ENSMUSG00000024610(Cd74),ENSMUSG00000025498(Irf7),ENSMUSG00000027514(Zbp1),ENSMUSG00000046879(Irgm1),ENSMUSG00000069874(Irgm2),ENSMUSG00000074151(Nlrc5)	-
BP	GO:0045619	regulation of lymphocyte differentiation	13	0	13	178	2.53938e-05	0.000801718	ENSMUSG00000021127(Zfp36l1),ENSMUSG00000023206(Il15ra),ENSMUSG00000024238(Zeb1),ENSMUSG00000024610(Cd74),ENSMUSG00000026770(Il2ra),ENSMUSG00000029204(Rhoh),ENSMUSG00000031712(Il15),ENSMUSG00000036594(H2-Aa),ENSMUSG00000037944(Ccr7),ENSMUSG00000039899(Fgl2),ENSMUSG00000044701(Il27),ENSMUSG00000045322(Tlr9),ENSMUSG00000048806(Ifnb1)	-
BP	GO:0001932	regulation of protein phosphorylation	43	6	49	1456	2.60004e-05	0.000816549	ENSMUSG00000000184(Ccnd2),ENSMUSG00000002307(Daxx),ENSMUSG00000009185(Ccl8),ENSMUSG00000012519(Mlkl),ENSMUSG00000015316(Slamf1),ENSMUSG00000015947(Fcgr1),ENSMUSG00000020717(Pecam1),ENSMUSG00000021367(Edn1),ENSMUSG00000022876(Samsn1),ENSMUSG00000022901(Cd86),ENSMUSG00000024079(Eif2ak2),ENSMUSG00000024397(Aif1),ENSMUSG00000024610(Cd74),ENSMUSG00000026121(Sema4c),ENSMUSG00000026360(Rgs2),ENSMUSG0000…	ENSMUSG00000016984(Etaa1),ENSMUSG00000026883(Dab2ip),ENSMUSG00000036867(Smad6),ENSMUSG00000038065(Mturn),ENSMUSG00000042745(Id1),ENSMUSG00000072082(Ccnf)
BP	GO:0006915	apoptotic process	50	9	59	1875	2.62955e-05	0.000821493	ENSMUSG00000000184(Ccnd2),ENSMUSG00000002104(Rapsn),ENSMUSG00000002307(Daxx),ENSMUSG00000014361(Mertk),ENSMUSG00000014773(Dll1),ENSMUSG00000016524(Il19),ENSMUSG00000019979(Apaf1),ENSMUSG00000021127(Zfp36l1),ENSMUSG00000021367(Edn1),ENSMUSG00000022684(Bfar),ENSMUSG00000022938(Fam3b),ENSMUSG00000024079(Eif2ak2),ENSMUSG00000024397(Aif1),ENSMUSG00000024610(Cd74),ENSMUSG00000024887(Asah2),ENSMUSG00000…	ENSMUSG00000023915(Tnfrsf21),ENSMUSG00000025764(Jade1),ENSMUSG00000026883(Dab2ip),ENSMUSG00000028933(Xrcc2),ENSMUSG00000036867(Smad6),ENSMUSG00000042745(Id1),ENSMUSG00000043866(Taf10),ENSMUSG00000048232(Fbxo10),ENSMUSG00000056501(Cebpb)
BP	GO:0042098	T cell proliferation	12	2	14	205	2.64702e-05	0.000822645	ENSMUSG00000006310(Zbtb32),ENSMUSG00000015316(Slamf1),ENSMUSG00000022901(Cd86),ENSMUSG00000024397(Aif1),ENSMUSG00000026770(Il2ra),ENSMUSG00000031628(Casp3),ENSMUSG00000031712(Il15),ENSMUSG00000036594(H2-Aa),ENSMUSG00000037944(Ccr7),ENSMUSG00000044701(Il27),ENSMUSG00000073421(H2-Ab1),ENSMUSG00000078763(Slfn1)	ENSMUSG00000023915(Tnfrsf21),ENSMUSG00000056501(Cebpb)
BP	GO:0032609	interferon-gamma production	10	0	10	107	2.70268e-05	0.000835589	ENSMUSG00000015316(Slamf1),ENSMUSG00000030149(Klrk1),ENSMUSG00000031639(Tlr3),ENSMUSG00000035692(Isg15),ENSMUSG00000037447(Arid5a),ENSMUSG00000037944(Ccr7),ENSMUSG00000041515(Irf8),ENSMUSG00000044583(Tlr7),ENSMUSG00000044701(Il27),ENSMUSG00000045322(Tlr9)	-
BP	GO:0012501	programmed cell death	51	9	60	1920	2.72249e-05	0.000837376	ENSMUSG00000000184(Ccnd2),ENSMUSG00000002104(Rapsn),ENSMUSG00000002307(Daxx),ENSMUSG00000012519(Mlkl),ENSMUSG00000014361(Mertk),ENSMUSG00000014773(Dll1),ENSMUSG00000016524(Il19),ENSMUSG00000019979(Apaf1),ENSMUSG00000021127(Zfp36l1),ENSMUSG00000021367(Edn1),ENSMUSG00000022684(Bfar),ENSMUSG00000022938(Fam3b),ENSMUSG00000024079(Eif2ak2),ENSMUSG00000024397(Aif1),ENSMUSG00000024610(Cd74),ENSMUSG000000…	ENSMUSG00000023915(Tnfrsf21),ENSMUSG00000025764(Jade1),ENSMUSG00000026883(Dab2ip),ENSMUSG00000028933(Xrcc2),ENSMUSG00000036867(Smad6),ENSMUSG00000042745(Id1),ENSMUSG00000043866(Taf10),ENSMUSG00000048232(Fbxo10),ENSMUSG00000056501(Cebpb)
BP	GO:1902105	regulation of leukocyte differentiation	16	1	17	291	2.83437e-05	0.000867317	ENSMUSG00000021127(Zfp36l1),ENSMUSG00000023206(Il15ra),ENSMUSG00000023367(Tmem176a),ENSMUSG00000024238(Zeb1),ENSMUSG00000024610(Cd74),ENSMUSG00000026770(Il2ra),ENSMUSG00000029204(Rhoh),ENSMUSG00000029810(Tmem176b),ENSMUSG00000031712(Il15),ENSMUSG00000033871(Ppargc1b),ENSMUSG00000036594(H2-Aa),ENSMUSG00000037944(Ccr7),ENSMUSG00000039899(Fgl2),ENSMUSG00000044701(Il27),ENSMUSG00000045322(Tlr9),ENSMU…	ENSMUSG00000056501(Cebpb)
BP	GO:0002478	antigen processing and presentation of exogenous peptide antigen	5	0	5	21	3.1841e-05	0.000959571	ENSMUSG00000015947(Fcgr1),ENSMUSG00000024610(Cd74),ENSMUSG00000036594(H2-Aa),ENSMUSG00000037321(Tap1),ENSMUSG00000073421(H2-Ab1)	-
BP	GO:0002504	antigen processing and presentation of peptide or polysaccharide antigen via MHC class II	5	0	5	21	3.1841e-05	0.000959571	ENSMUSG00000024610(Cd74),ENSMUSG00000036594(H2-Aa),ENSMUSG00000060586(H2-Eb1),ENSMUSG00000073421(H2-Ab1),ENSMUSG00000079547(H2-DMb1)	-
BP	GO:0002577	regulation of antigen processing and presentation	5	0	5	21	3.1841e-05	0.000959571	ENSMUSG00000024610(Cd74),ENSMUSG00000037944(Ccr7),ENSMUSG00000038058(Nod1),ENSMUSG00000039899(Fgl2),ENSMUSG00000073421(H2-Ab1)	-
BP	GO:0016032	viral process	18	0	18	324	3.22366e-05	0.000966613	ENSMUSG00000006411(Nectin4),ENSMUSG00000020641(Rsad2),ENSMUSG00000024079(Eif2ak2),ENSMUSG00000024610(Cd74),ENSMUSG00000025492(Ifitm3),ENSMUSG00000027514(Zbp1),ENSMUSG00000030921(Trim30a),ENSMUSG00000032661(Oas3),ENSMUSG00000035692(Isg15),ENSMUSG00000036986(Pml),ENSMUSG00000039236(Isg20),ENSMUSG00000041827(Oasl1),ENSMUSG00000044786(Zfp36),ENSMUSG00000048806(Ifnb1),ENSMUSG00000057596(Trim30d),ENSMU…	-
BP	GO:0034154	toll-like receptor 7 signaling pathway	4	0	4	11	3.28157e-05	0.000979056	ENSMUSG00000020641(Rsad2),ENSMUSG00000025058(Tasl),ENSMUSG00000044583(Tlr7),ENSMUSG00000057135(Scimp)	-
BP	GO:0019058	viral life cycle	15	0	15	238	3.51022e-05	0.00104206	ENSMUSG00000006411(Nectin4),ENSMUSG00000020641(Rsad2),ENSMUSG00000024079(Eif2ak2),ENSMUSG00000024610(Cd74),ENSMUSG00000025492(Ifitm3),ENSMUSG00000030921(Trim30a),ENSMUSG00000032661(Oas3),ENSMUSG00000035692(Isg15),ENSMUSG00000036986(Pml),ENSMUSG00000039236(Isg20),ENSMUSG00000041827(Oasl1),ENSMUSG00000048806(Ifnb1),ENSMUSG00000057596(Trim30d),ENSMUSG00000066861(Oas1g),ENSMUSG00000078616(Trim30c)	-
BP	GO:0002367	cytokine production involved in immune response	9	0	9	89	3.64425e-05	0.0010765	ENSMUSG00000015316(Slamf1),ENSMUSG00000020641(Rsad2),ENSMUSG00000024610(Cd74),ENSMUSG00000031639(Tlr3),ENSMUSG00000037447(Arid5a),ENSMUSG00000040296(Ddx58),ENSMUSG00000045322(Tlr9),ENSMUSG00000048806(Ifnb1),ENSMUSG00000057135(Scimp)	-
BP	GO:0032729	positive regulation of interferon-gamma production	8	0	8	69	3.67104e-05	0.00107907	ENSMUSG00000015316(Slamf1),ENSMUSG00000030149(Klrk1),ENSMUSG00000031639(Tlr3),ENSMUSG00000037447(Arid5a),ENSMUSG00000041515(Irf8),ENSMUSG00000044583(Tlr7),ENSMUSG00000044701(Il27),ENSMUSG00000045322(Tlr9)	-
BP	GO:0061900	glial cell activation	7	0	7	51	3.74713e-05	0.00109291	ENSMUSG00000024397(Aif1),ENSMUSG00000030560(Ctsc),ENSMUSG00000031639(Tlr3),ENSMUSG00000036887(C1qa),ENSMUSG00000044583(Tlr7),ENSMUSG00000045322(Tlr9),ENSMUSG00000068129(Cst7)	-
BP	GO:0032680	regulation of tumor necrosis factor production	12	0	12	159	3.75477e-05	0.00109291	ENSMUSG00000004040(Stat3),ENSMUSG00000015316(Slamf1),ENSMUSG00000026896(Ifih1),ENSMUSG00000030921(Trim30a),ENSMUSG00000031639(Tlr3),ENSMUSG00000037447(Arid5a),ENSMUSG00000037944(Ccr7),ENSMUSG00000038058(Nod1),ENSMUSG00000040296(Ddx58),ENSMUSG00000044786(Zfp36),ENSMUSG00000045322(Tlr9),ENSMUSG00000079227(Ccr5)	-
BP	GO:0070664	negative regulation of leukocyte proliferation	7	2	9	90	3.98481e-05	0.00115424	ENSMUSG00000022901(Cd86),ENSMUSG00000026770(Il2ra),ENSMUSG00000031628(Casp3),ENSMUSG00000035352(Ccl12),ENSMUSG00000036594(H2-Aa),ENSMUSG00000073421(H2-Ab1),ENSMUSG00000078763(Slfn1)	ENSMUSG00000023915(Tnfrsf21),ENSMUSG00000056501(Cebpb)
BP	GO:0042130	negative regulation of T cell proliferation	6	2	8	70	4.07947e-05	0.00117595	ENSMUSG00000022901(Cd86),ENSMUSG00000026770(Il2ra),ENSMUSG00000031628(Casp3),ENSMUSG00000036594(H2-Aa),ENSMUSG00000073421(H2-Ab1),ENSMUSG00000078763(Slfn1)	ENSMUSG00000023915(Tnfrsf21),ENSMUSG00000056501(Cebpb)
MF	GO:0043168	anion binding	69	10	79	2850	4.12887e-05	0.00117965	ENSMUSG00000002227(Mov10),ENSMUSG00000005237(Dnah2),ENSMUSG00000009185(Ccl8),ENSMUSG00000012519(Mlkl),ENSMUSG00000014361(Mertk),ENSMUSG00000017830(Dhx58),ENSMUSG00000019979(Apaf1),ENSMUSG00000020638(Cmpk2),ENSMUSG00000020709(Adap2),ENSMUSG00000024079(Eif2ak2),ENSMUSG00000025324(Atp10a),ENSMUSG00000026764(Kif5c),ENSMUSG00000026773(Pfkfb3),ENSMUSG00000026866(Kynu),ENSMUSG00000026896(Ifih1),ENSMUSG0…	ENSMUSG00000002769(Gnmt),ENSMUSG00000009566(Fpgs),ENSMUSG00000022621(Rabl2),ENSMUSG00000026409(Pfkfb2),ENSMUSG00000026575(Nme7),ENSMUSG00000026785(Pkn3),ENSMUSG00000026883(Dab2ip),ENSMUSG00000027379(Bub1),ENSMUSG00000028933(Xrcc2),ENSMUSG00000032456(Nmnat3)
BP	GO:0042221	response to chemical	121	16	137	5573	4.13183e-05	0.00117965	ENSMUSG00000000247(Lhx2),ENSMUSG00000001552(Jup),ENSMUSG00000002307(Daxx),ENSMUSG00000003617(Cp),ENSMUSG00000004040(Stat3),ENSMUSG00000004698(Hdac9),ENSMUSG00000009185(Ccl8),ENSMUSG00000014773(Dll1),ENSMUSG00000015222(Map2),ENSMUSG00000015316(Slamf1),ENSMUSG00000019082(Slc25a22),ENSMUSG00000019979(Apaf1),ENSMUSG00000020464(Pnpt1),ENSMUSG00000020638(Cmpk2),ENSMUSG00000021127(Zfp36l1),ENSMUSG000000…	ENSMUSG00000001227(Sema6b),ENSMUSG00000006442(Srm),ENSMUSG00000006641(Slc5a6),ENSMUSG00000022474(Pmm1),ENSMUSG00000023915(Tnfrsf21),ENSMUSG00000025931(Paqr8),ENSMUSG00000026409(Pfkfb2),ENSMUSG00000026883(Dab2ip),ENSMUSG00000028539(Artn),ENSMUSG00000030322(Mbd4),ENSMUSG00000032456(Nmnat3),ENSMUSG00000033863(Klf9),ENSMUSG00000034957(Cebpa),ENSMUSG00000036867(Smad6),ENSMUSG00000042745(Id1),ENSMUSG00…
BP	GO:0032640	tumor necrosis factor production	12	0	12	161	4.24535e-05	0.00119415	ENSMUSG00000004040(Stat3),ENSMUSG00000015316(Slamf1),ENSMUSG00000026896(Ifih1),ENSMUSG00000030921(Trim30a),ENSMUSG00000031639(Tlr3),ENSMUSG00000037447(Arid5a),ENSMUSG00000037944(Ccr7),ENSMUSG00000038058(Nod1),ENSMUSG00000040296(Ddx58),ENSMUSG00000044786(Zfp36),ENSMUSG00000045322(Tlr9),ENSMUSG00000079227(Ccr5)	-
BP	GO:1903555	regulation of tumor necrosis factor superfamily cytokine production	12	0	12	161	4.24535e-05	0.00119415	ENSMUSG00000004040(Stat3),ENSMUSG00000015316(Slamf1),ENSMUSG00000026896(Ifih1),ENSMUSG00000030921(Trim30a),ENSMUSG00000031639(Tlr3),ENSMUSG00000037447(Arid5a),ENSMUSG00000037944(Ccr7),ENSMUSG00000038058(Nod1),ENSMUSG00000040296(Ddx58),ENSMUSG00000044786(Zfp36),ENSMUSG00000045322(Tlr9),ENSMUSG00000079227(Ccr5)	-
BP	GO:0032481	positive regulation of type I interferon production	7	0	7	52	4.26267e-05	0.00119415	ENSMUSG00000017830(Dhx58),ENSMUSG00000025498(Irf7),ENSMUSG00000026896(Ifih1),ENSMUSG00000031639(Tlr3),ENSMUSG00000040296(Ddx58),ENSMUSG00000044583(Tlr7),ENSMUSG00000045322(Tlr9)	-
BP	GO:0032648	regulation of interferon-beta production	7	0	7	52	4.26267e-05	0.00119415	ENSMUSG00000017830(Dhx58),ENSMUSG00000025498(Irf7),ENSMUSG00000026896(Ifih1),ENSMUSG00000031639(Tlr3),ENSMUSG00000040296(Ddx58),ENSMUSG00000044583(Tlr7),ENSMUSG00000045322(Tlr9)	-
BP	GO:0001959	regulation of cytokine-mediated signaling pathway	10	0	10	114	4.67561e-05	0.00130137	ENSMUSG00000021367(Edn1),ENSMUSG00000024610(Cd74),ENSMUSG00000025498(Irf7),ENSMUSG00000026981(Il1rn),ENSMUSG00000027514(Zbp1),ENSMUSG00000027639(Samhd1),ENSMUSG00000046879(Irgm1),ENSMUSG00000064090(Vrk2),ENSMUSG00000069874(Irgm2),ENSMUSG00000074151(Nlrc5)	-
BP	GO:0033993	response to lipid	30	6	36	969	4.68903e-05	0.00130137	ENSMUSG00000002307(Daxx),ENSMUSG00000004040(Stat3),ENSMUSG00000020638(Cmpk2),ENSMUSG00000021127(Zfp36l1),ENSMUSG00000021367(Edn1),ENSMUSG00000021423(Ly86),ENSMUSG00000022901(Cd86),ENSMUSG00000024079(Eif2ak2),ENSMUSG00000024397(Aif1),ENSMUSG00000026981(Il1rn),ENSMUSG00000028270(Gbp2),ENSMUSG00000029417(Cxcl9),ENSMUSG00000030149(Klrk1),ENSMUSG00000031628(Casp3),ENSMUSG00000031712(Il15),ENSMUSG00000…	ENSMUSG00000025931(Paqr8),ENSMUSG00000026883(Dab2ip),ENSMUSG00000030322(Mbd4),ENSMUSG00000033863(Klf9),ENSMUSG00000036867(Smad6),ENSMUSG00000056501(Cebpb)
BP	GO:0071706	tumor necrosis factor superfamily cytokine production	12	0	12	163	4.79054e-05	0.00130987	ENSMUSG00000004040(Stat3),ENSMUSG00000015316(Slamf1),ENSMUSG00000026896(Ifih1),ENSMUSG00000030921(Trim30a),ENSMUSG00000031639(Tlr3),ENSMUSG00000037447(Arid5a),ENSMUSG00000037944(Ccr7),ENSMUSG00000038058(Nod1),ENSMUSG00000040296(Ddx58),ENSMUSG00000044786(Zfp36),ENSMUSG00000045322(Tlr9),ENSMUSG00000079227(Ccr5)	-
BP	GO:0002443	leukocyte mediated immunity	18	0	18	334	4.79071e-05	0.00130987	ENSMUSG00000015316(Slamf1),ENSMUSG00000015947(Fcgr1),ENSMUSG00000020641(Rsad2),ENSMUSG00000024610(Cd74),ENSMUSG00000025498(Irf7),ENSMUSG00000030149(Klrk1),ENSMUSG00000030560(Ctsc),ENSMUSG00000031639(Tlr3),ENSMUSG00000036887(C1qa),ENSMUSG00000036905(C1qb),ENSMUSG00000037321(Tap1),ENSMUSG00000037447(Arid5a),ENSMUSG00000040296(Ddx58),ENSMUSG00000045322(Tlr9),ENSMUSG00000048806(Ifnb1),ENSMUSG00000057…	-
BP	GO:0032608	interferon-beta production	7	0	7	53	4.83497e-05	0.00130987	ENSMUSG00000017830(Dhx58),ENSMUSG00000025498(Irf7),ENSMUSG00000026896(Ifih1),ENSMUSG00000031639(Tlr3),ENSMUSG00000040296(Ddx58),ENSMUSG00000044583(Tlr7),ENSMUSG00000045322(Tlr9)	-
BP	GO:0002468	dendritic cell antigen processing and presentation	4	0	4	12	4.85137e-05	0.00130987	ENSMUSG00000024610(Cd74),ENSMUSG00000037944(Ccr7),ENSMUSG00000038058(Nod1),ENSMUSG00000039899(Fgl2)	-
BP	GO:0002579	positive regulation of antigen processing and presentation	4	0	4	12	4.85137e-05	0.00130987	ENSMUSG00000024610(Cd74),ENSMUSG00000037944(Ccr7),ENSMUSG00000038058(Nod1),ENSMUSG00000073421(H2-Ab1)	-
BP	GO:0002730	regulation of dendritic cell cytokine production	4	0	4	12	4.85137e-05	0.00130987	ENSMUSG00000031639(Tlr3),ENSMUSG00000040296(Ddx58),ENSMUSG00000045322(Tlr9),ENSMUSG00000057135(Scimp)	-
BP	GO:0045069	regulation of viral genome replication	9	0	9	93	5.17228e-05	0.00139022	ENSMUSG00000020641(Rsad2),ENSMUSG00000024079(Eif2ak2),ENSMUSG00000025492(Ifitm3),ENSMUSG00000032661(Oas3),ENSMUSG00000035692(Isg15),ENSMUSG00000039236(Isg20),ENSMUSG00000041827(Oasl1),ENSMUSG00000048806(Ifnb1),ENSMUSG00000066861(Oas1g)	-
MF	GO:0036094	small molecule binding	63	10	73	2593	5.30985e-05	0.0014208	ENSMUSG00000002227(Mov10),ENSMUSG00000005237(Dnah2),ENSMUSG00000012519(Mlkl),ENSMUSG00000014361(Mertk),ENSMUSG00000017830(Dhx58),ENSMUSG00000019979(Apaf1),ENSMUSG00000020638(Cmpk2),ENSMUSG00000020709(Adap2),ENSMUSG00000024079(Eif2ak2),ENSMUSG00000025324(Atp10a),ENSMUSG00000026764(Kif5c),ENSMUSG00000026773(Pfkfb3),ENSMUSG00000026866(Kynu),ENSMUSG00000026896(Ifih1),ENSMUSG00000027293(Ehd4),ENSMUSG0…	ENSMUSG00000002769(Gnmt),ENSMUSG00000009566(Fpgs),ENSMUSG00000022621(Rabl2),ENSMUSG00000026409(Pfkfb2),ENSMUSG00000026575(Nme7),ENSMUSG00000026785(Pkn3),ENSMUSG00000027379(Bub1),ENSMUSG00000028933(Xrcc2),ENSMUSG00000032456(Nmnat3),ENSMUSG00000038644(Pold1)
BP	GO:0032757	positive regulation of interleukin-8 production	7	0	7	54	5.46872e-05	0.00145678	ENSMUSG00000004040(Stat3),ENSMUSG00000024610(Cd74),ENSMUSG00000031639(Tlr3),ENSMUSG00000038058(Nod1),ENSMUSG00000040296(Ddx58),ENSMUSG00000044583(Tlr7),ENSMUSG00000045322(Tlr9)	-
MF	GO:0016787	hydrolase activity	63	8	71	2506	5.63743e-05	0.00149505	ENSMUSG00000002227(Mov10),ENSMUSG00000004698(Hdac9),ENSMUSG00000005237(Dnah2),ENSMUSG00000017830(Dhx58),ENSMUSG00000019990(Pde7b),ENSMUSG00000020464(Pnpt1),ENSMUSG00000023903(Mmp25),ENSMUSG00000023961(Enpp4),ENSMUSG00000024887(Asah2),ENSMUSG00000026764(Kif5c),ENSMUSG00000026773(Pfkfb3),ENSMUSG00000026866(Kynu),ENSMUSG00000026896(Ifih1),ENSMUSG00000027639(Samhd1),ENSMUSG00000027669(Gnb4),ENSMUSG00…	ENSMUSG00000022621(Rabl2),ENSMUSG00000026409(Pfkfb2),ENSMUSG00000026975(Dph7),ENSMUSG00000027999(Pla2g12a),ENSMUSG00000028933(Xrcc2),ENSMUSG00000030322(Mbd4),ENSMUSG00000038644(Pold1),ENSMUSG00000060152(Pop5)
BP	GO:0050729	positive regulation of inflammatory response	9	2	11	141	5.82886e-05	0.00153897	ENSMUSG00000004040(Stat3),ENSMUSG00000010358(Ifi35),ENSMUSG00000015947(Fcgr1),ENSMUSG00000027514(Zbp1),ENSMUSG00000030560(Ctsc),ENSMUSG00000031639(Tlr3),ENSMUSG00000037944(Ccr7),ENSMUSG00000045322(Tlr9),ENSMUSG00000079227(Ccr5)	ENSMUSG00000034957(Cebpa),ENSMUSG00000056501(Cebpb)
BP	GO:0032760	positive regulation of tumor necrosis factor production	9	0	9	95	6.11942e-05	0.00160857	ENSMUSG00000004040(Stat3),ENSMUSG00000026896(Ifih1),ENSMUSG00000031639(Tlr3),ENSMUSG00000037447(Arid5a),ENSMUSG00000037944(Ccr7),ENSMUSG00000038058(Nod1),ENSMUSG00000040296(Ddx58),ENSMUSG00000045322(Tlr9),ENSMUSG00000079227(Ccr5)	-
BP	GO:1903557	positive regulation of tumor necrosis factor superfamily cytokine production	9	0	9	96	6.64525e-05	0.00173913	ENSMUSG00000004040(Stat3),ENSMUSG00000026896(Ifih1),ENSMUSG00000031639(Tlr3),ENSMUSG00000037447(Arid5a),ENSMUSG00000037944(Ccr7),ENSMUSG00000038058(Nod1),ENSMUSG00000040296(Ddx58),ENSMUSG00000045322(Tlr9),ENSMUSG00000079227(Ccr5)	-
BP	GO:0002371	dendritic cell cytokine production	4	0	4	13	6.90656e-05	0.00179963	ENSMUSG00000031639(Tlr3),ENSMUSG00000040296(Ddx58),ENSMUSG00000045322(Tlr9),ENSMUSG00000057135(Scimp)	-
BP	GO:0022407	regulation of cell-cell adhesion	18	2	20	411	7.67633e-05	0.00199151	ENSMUSG00000015316(Slamf1),ENSMUSG00000022901(Cd86),ENSMUSG00000024397(Aif1),ENSMUSG00000024610(Cd74),ENSMUSG00000026770(Il2ra),ENSMUSG00000026981(Il1rn),ENSMUSG00000029204(Rhoh),ENSMUSG00000031628(Casp3),ENSMUSG00000031712(Il15),ENSMUSG00000036594(H2-Aa),ENSMUSG00000037944(Ccr7),ENSMUSG00000039899(Fgl2),ENSMUSG00000048806(Ifnb1),ENSMUSG00000073421(H2-Ab1),ENSMUSG00000078763(Slfn1),ENSMUSG0000007…	ENSMUSG00000023915(Tnfrsf21),ENSMUSG00000056501(Cebpb)
BP	GO:0071359	cellular response to dsRNA	5	0	5	25	7.82788e-05	0.00202203	ENSMUSG00000026896(Ifih1),ENSMUSG00000031639(Tlr3),ENSMUSG00000040296(Ddx58),ENSMUSG00000048806(Ifnb1),ENSMUSG00000079339(Ifit1bl1)	-
BP	GO:0007166	cell surface receptor signaling pathway	62	10	72	2526	7.92381e-05	0.00203799	ENSMUSG00000004040(Stat3),ENSMUSG00000009185(Ccl8),ENSMUSG00000012519(Mlkl),ENSMUSG00000014361(Mertk),ENSMUSG00000014773(Dll1),ENSMUSG00000015316(Slamf1),ENSMUSG00000015852(Fcrls),ENSMUSG00000015947(Fcgr1),ENSMUSG00000016524(Il19),ENSMUSG00000017314(Mpp2),ENSMUSG00000020717(Pecam1),ENSMUSG00000021367(Edn1),ENSMUSG00000021423(Ly86),ENSMUSG00000022901(Cd86),ENSMUSG00000023206(Il15ra),ENSMUSG0000002…	ENSMUSG00000001227(Sema6b),ENSMUSG00000022494(Shisa9),ENSMUSG00000023915(Tnfrsf21),ENSMUSG00000025764(Jade1),ENSMUSG00000026883(Dab2ip),ENSMUSG00000028539(Artn),ENSMUSG00000034758(Tle6),ENSMUSG00000034957(Cebpa),ENSMUSG00000036867(Smad6),ENSMUSG00000042745(Id1)
BP	GO:1901224	positive regulation of NIK/NF-kappaB signaling	8	0	8	77	8.13757e-05	0.00208399	ENSMUSG00000010358(Ifi35),ENSMUSG00000021367(Edn1),ENSMUSG00000022901(Cd86),ENSMUSG00000024079(Eif2ak2),ENSMUSG00000031639(Tlr3),ENSMUSG00000038058(Nod1),ENSMUSG00000044583(Tlr7),ENSMUSG00000045322(Tlr9)	-
BP	GO:0071407	cellular response to organic cyclic compound	21	4	25	586	8.58644e-05	0.00218954	ENSMUSG00000001552(Jup),ENSMUSG00000002307(Daxx),ENSMUSG00000004040(Stat3),ENSMUSG00000021127(Zfp36l1),ENSMUSG00000021367(Edn1),ENSMUSG00000024397(Aif1),ENSMUSG00000026896(Ifih1),ENSMUSG00000031628(Casp3),ENSMUSG00000031639(Tlr3),ENSMUSG00000031712(Il15),ENSMUSG00000033871(Ppargc1b),ENSMUSG00000034640(Tiparp),ENSMUSG00000034997(Htr2a),ENSMUSG00000035352(Ccl12),ENSMUSG00000036362(P2ry13),ENSMUSG00…	ENSMUSG00000025931(Paqr8),ENSMUSG00000033863(Klf9),ENSMUSG00000034957(Cebpa),ENSMUSG00000056501(Cebpb)
BP	GO:0030593	neutrophil chemotaxis	9	0	9	100	9.14524e-05	0.00232211	ENSMUSG00000009185(Ccl8),ENSMUSG00000021367(Edn1),ENSMUSG00000024610(Cd74),ENSMUSG00000026581(Sell),ENSMUSG00000029417(Cxcl9),ENSMUSG00000034855(Cxcl10),ENSMUSG00000035352(Ccl12),ENSMUSG00000037944(Ccr7),ENSMUSG00000048534(Jaml)	-
BP	GO:0002696	positive regulation of leukocyte activation	16	1	17	320	9.21873e-05	0.00233085	ENSMUSG00000015316(Slamf1),ENSMUSG00000022901(Cd86),ENSMUSG00000023206(Il15ra),ENSMUSG00000024397(Aif1),ENSMUSG00000024610(Cd74),ENSMUSG00000026770(Il2ra),ENSMUSG00000029204(Rhoh),ENSMUSG00000030149(Klrk1),ENSMUSG00000030560(Ctsc),ENSMUSG00000031712(Il15),ENSMUSG00000036594(H2-Aa),ENSMUSG00000037944(Ccr7),ENSMUSG00000045322(Tlr9),ENSMUSG00000073421(H2-Ab1),ENSMUSG00000095028(Sirpb1b),ENSMUSG00000…	ENSMUSG00000034957(Cebpa)
BP	GO:0030098	lymphocyte differentiation	19	0	19	384	9.29922e-05	0.00234129	ENSMUSG00000004040(Stat3),ENSMUSG00000014361(Mertk),ENSMUSG00000014773(Dll1),ENSMUSG00000015316(Slamf1),ENSMUSG00000020641(Rsad2),ENSMUSG00000021127(Zfp36l1),ENSMUSG00000023206(Il15ra),ENSMUSG00000024238(Zeb1),ENSMUSG00000024610(Cd74),ENSMUSG00000026770(Il2ra),ENSMUSG00000029204(Rhoh),ENSMUSG00000031712(Il15),ENSMUSG00000036594(H2-Aa),ENSMUSG00000037944(Ccr7),ENSMUSG00000039899(Fgl2),ENSMUSG00000…	-
BP	GO:0071621	granulocyte chemotaxis	10	0	10	124	9.54107e-05	0.00239208	ENSMUSG00000009185(Ccl8),ENSMUSG00000015316(Slamf1),ENSMUSG00000021367(Edn1),ENSMUSG00000024610(Cd74),ENSMUSG00000026581(Sell),ENSMUSG00000029417(Cxcl9),ENSMUSG00000034855(Cxcl10),ENSMUSG00000035352(Ccl12),ENSMUSG00000037944(Ccr7),ENSMUSG00000048534(Jaml)	-
BP	GO:0022610	biological adhesion	42	3	45	1368	9.71731e-05	0.00242607	ENSMUSG00000001552(Jup),ENSMUSG00000001768(Rin2),ENSMUSG00000006411(Nectin4),ENSMUSG00000014361(Mertk),ENSMUSG00000014773(Dll1),ENSMUSG00000015316(Slamf1),ENSMUSG00000020717(Pecam1),ENSMUSG00000021127(Zfp36l1),ENSMUSG00000022901(Cd86),ENSMUSG00000024397(Aif1),ENSMUSG00000024610(Cd74),ENSMUSG00000026581(Sell),ENSMUSG00000026770(Il2ra),ENSMUSG00000026981(Il1rn),ENSMUSG00000028268(Gbp3),ENSMUSG00000…	ENSMUSG00000023915(Tnfrsf21),ENSMUSG00000036867(Smad6),ENSMUSG00000056501(Cebpb)
CC	GO:0043230	extracellular organelle	9	0	9	99	9.91862e-05	0.00246602	ENSMUSG00000022901(Cd86),ENSMUSG00000024887(Asah2),ENSMUSG00000028268(Gbp3),ENSMUSG00000028270(Gbp2),ENSMUSG00000029298(Gbp9),ENSMUSG00000040253(Gbp7),ENSMUSG00000054072(Iigp1),ENSMUSG00000069874(Irgm2),ENSMUSG00000104713(Gbp6)	-
BP	GO:0060337	type I interferon signaling pathway	6	0	6	42	0.000108107	0.00267666	ENSMUSG00000025492(Ifitm3),ENSMUSG00000025498(Irf7),ENSMUSG00000027514(Zbp1),ENSMUSG00000027639(Samhd1),ENSMUSG00000048806(Ifnb1),ENSMUSG00000074151(Nlrc5)	-
BP	GO:0019884	antigen processing and presentation of exogenous antigen	5	0	5	27	0.000115421	0.00283424	ENSMUSG00000015947(Fcgr1),ENSMUSG00000024610(Cd74),ENSMUSG00000036594(H2-Aa),ENSMUSG00000037321(Tap1),ENSMUSG00000073421(H2-Ab1)	-
BP	GO:0034123	positive regulation of toll-like receptor signaling pathway	5	0	5	27	0.000115421	0.00283424	ENSMUSG00000010358(Ifi35),ENSMUSG00000020641(Rsad2),ENSMUSG00000025058(Tasl),ENSMUSG00000031639(Tlr3),ENSMUSG00000045322(Tlr9)	-
BP	GO:0042088	T-helper 1 type immune response	6	0	6	43	0.000123721	0.00302558	ENSMUSG00000015316(Slamf1),ENSMUSG00000037447(Arid5a),ENSMUSG00000037944(Ccr7),ENSMUSG00000044701(Il27),ENSMUSG00000070427(Il18bp),ENSMUSG00000073421(H2-Ab1)	-
BP	GO:0009967	positive regulation of signal transduction	47	2	49	1551	0.000124985	0.00304403	ENSMUSG00000004040(Stat3),ENSMUSG00000009185(Ccl8),ENSMUSG00000010358(Ifi35),ENSMUSG00000012519(Mlkl),ENSMUSG00000014773(Dll1),ENSMUSG00000015316(Slamf1),ENSMUSG00000016524(Il19),ENSMUSG00000017830(Dhx58),ENSMUSG00000019979(Apaf1),ENSMUSG00000020641(Rsad2),ENSMUSG00000020717(Pecam1),ENSMUSG00000021367(Edn1),ENSMUSG00000021423(Ly86),ENSMUSG00000022901(Cd86),ENSMUSG00000024079(Eif2ak2),ENSMUSG00000…	ENSMUSG00000026883(Dab2ip),ENSMUSG00000038065(Mturn)
BP	GO:0097028	dendritic cell differentiation	5	1	6	44	0.00014107	0.0034218	ENSMUSG00000023367(Tmem176a),ENSMUSG00000029810(Tmem176b),ENSMUSG00000037944(Ccr7),ENSMUSG00000039699(Batf2),ENSMUSG00000041515(Irf8)	ENSMUSG00000056501(Cebpb)
BP	GO:0006468	protein phosphorylation	49	8	57	1904	0.000142095	0.00343271	ENSMUSG00000000184(Ccnd2),ENSMUSG00000002307(Daxx),ENSMUSG00000009185(Ccl8),ENSMUSG00000012519(Mlkl),ENSMUSG00000014361(Mertk),ENSMUSG00000015316(Slamf1),ENSMUSG00000015947(Fcgr1),ENSMUSG00000020717(Pecam1),ENSMUSG00000021127(Zfp36l1),ENSMUSG00000021367(Edn1),ENSMUSG00000022876(Samsn1),ENSMUSG00000022901(Cd86),ENSMUSG00000024079(Eif2ak2),ENSMUSG00000024397(Aif1),ENSMUSG00000024610(Cd74),ENSMUSG00…	ENSMUSG00000016984(Etaa1),ENSMUSG00000026785(Pkn3),ENSMUSG00000026883(Dab2ip),ENSMUSG00000027379(Bub1),ENSMUSG00000036867(Smad6),ENSMUSG00000038065(Mturn),ENSMUSG00000042745(Id1),ENSMUSG00000072082(Ccnf)
BP	GO:0022408	negative regulation of cell-cell adhesion	10	2	12	183	0.00014527	0.00349527	ENSMUSG00000022901(Cd86),ENSMUSG00000024610(Cd74),ENSMUSG00000026770(Il2ra),ENSMUSG00000026981(Il1rn),ENSMUSG00000031628(Casp3),ENSMUSG00000036594(H2-Aa),ENSMUSG00000039899(Fgl2),ENSMUSG00000048806(Ifnb1),ENSMUSG00000073421(H2-Ab1),ENSMUSG00000078763(Slfn1)	ENSMUSG00000023915(Tnfrsf21),ENSMUSG00000056501(Cebpb)
BP	GO:0050672	negative regulation of lymphocyte proliferation	6	2	8	84	0.000150905	0.00361627	ENSMUSG00000022901(Cd86),ENSMUSG00000026770(Il2ra),ENSMUSG00000031628(Casp3),ENSMUSG00000036594(H2-Aa),ENSMUSG00000073421(H2-Ab1),ENSMUSG00000078763(Slfn1)	ENSMUSG00000023915(Tnfrsf21),ENSMUSG00000056501(Cebpb)
BP	GO:0050867	positive regulation of cell activation	16	1	17	335	0.000159895	0.00381638	ENSMUSG00000015316(Slamf1),ENSMUSG00000022901(Cd86),ENSMUSG00000023206(Il15ra),ENSMUSG00000024397(Aif1),ENSMUSG00000024610(Cd74),ENSMUSG00000026770(Il2ra),ENSMUSG00000029204(Rhoh),ENSMUSG00000030149(Klrk1),ENSMUSG00000030560(Ctsc),ENSMUSG00000031712(Il15),ENSMUSG00000036594(H2-Aa),ENSMUSG00000037944(Ccr7),ENSMUSG00000045322(Tlr9),ENSMUSG00000073421(H2-Ab1),ENSMUSG00000095028(Sirpb1b),ENSMUSG00000…	ENSMUSG00000034957(Cebpa)
BP	GO:0032945	negative regulation of mononuclear cell proliferation	6	2	8	85	0.000163969	0.00388433	ENSMUSG00000022901(Cd86),ENSMUSG00000026770(Il2ra),ENSMUSG00000031628(Casp3),ENSMUSG00000036594(H2-Aa),ENSMUSG00000073421(H2-Ab1),ENSMUSG00000078763(Slfn1)	ENSMUSG00000023915(Tnfrsf21),ENSMUSG00000056501(Cebpb)
BP	GO:0150076	neuroinflammatory response	7	0	7	64	0.000164044	0.00388433	ENSMUSG00000024397(Aif1),ENSMUSG00000030560(Ctsc),ENSMUSG00000031639(Tlr3),ENSMUSG00000036887(C1qa),ENSMUSG00000044583(Tlr7),ENSMUSG00000045322(Tlr9),ENSMUSG00000068129(Cst7)	-
BP	GO:0002449	lymphocyte mediated immunity	14	0	14	244	0.000172104	0.00405906	ENSMUSG00000015316(Slamf1),ENSMUSG00000015947(Fcgr1),ENSMUSG00000020641(Rsad2),ENSMUSG00000024610(Cd74),ENSMUSG00000025498(Irf7),ENSMUSG00000030149(Klrk1),ENSMUSG00000030560(Ctsc),ENSMUSG00000036887(C1qa),ENSMUSG00000036905(C1qb),ENSMUSG00000037321(Tap1),ENSMUSG00000037447(Arid5a),ENSMUSG00000048806(Ifnb1),ENSMUSG00000073418(C4b),ENSMUSG00000073421(H2-Ab1)	-
BP	GO:0097529	myeloid leukocyte migration	13	0	13	215	0.00017471	0.00410432	ENSMUSG00000009185(Ccl8),ENSMUSG00000015316(Slamf1),ENSMUSG00000020717(Pecam1),ENSMUSG00000021367(Edn1),ENSMUSG00000024397(Aif1),ENSMUSG00000024610(Cd74),ENSMUSG00000026581(Sell),ENSMUSG00000029204(Rhoh),ENSMUSG00000029417(Cxcl9),ENSMUSG00000034855(Cxcl10),ENSMUSG00000035352(Ccl12),ENSMUSG00000037944(Ccr7),ENSMUSG00000048534(Jaml)	-
BP	GO:0019079	viral genome replication	9	0	9	109	0.000177511	0.00415376	ENSMUSG00000020641(Rsad2),ENSMUSG00000024079(Eif2ak2),ENSMUSG00000025492(Ifitm3),ENSMUSG00000032661(Oas3),ENSMUSG00000035692(Isg15),ENSMUSG00000039236(Isg20),ENSMUSG00000041827(Oasl1),ENSMUSG00000048806(Ifnb1),ENSMUSG00000066861(Oas1g)	-
BP	GO:0031323	regulation of cellular metabolic process	117	28	145	6154	0.000189309	0.00441253	ENSMUSG00000000184(Ccnd2),ENSMUSG00000000247(Lhx2),ENSMUSG00000001156(Mxd1),ENSMUSG00000001552(Jup),ENSMUSG00000002227(Mov10),ENSMUSG00000002307(Daxx),ENSMUSG00000004040(Stat3),ENSMUSG00000004698(Hdac9),ENSMUSG00000006310(Zbtb32),ENSMUSG00000009185(Ccl8),ENSMUSG00000012519(Mlkl),ENSMUSG00000014361(Mertk),ENSMUSG00000014773(Dll1),ENSMUSG00000015316(Slamf1),ENSMUSG00000015947(Fcgr1),ENSMUSG00000019…	ENSMUSG00000000983(Wfdc18),ENSMUSG00000002769(Gnmt),ENSMUSG00000016984(Etaa1),ENSMUSG00000025764(Jade1),ENSMUSG00000026409(Pfkfb2),ENSMUSG00000026873(Phf19),ENSMUSG00000026883(Dab2ip),ENSMUSG00000026975(Dph7),ENSMUSG00000030145(Zfp248),ENSMUSG00000031671(Setd6),ENSMUSG00000034758(Tle6),ENSMUSG00000034800(Zfp661),ENSMUSG00000034957(Cebpa),ENSMUSG00000036867(Smad6),ENSMUSG00000038065(Mturn),ENSMUSG…
BP	GO:0046330	positive regulation of JNK cascade	8	2	10	135	0.000192894	0.0044786	ENSMUSG00000012519(Mlkl),ENSMUSG00000015316(Slamf1),ENSMUSG00000021367(Edn1),ENSMUSG00000026981(Il1rn),ENSMUSG00000031639(Tlr3),ENSMUSG00000037944(Ccr7),ENSMUSG00000038058(Nod1),ENSMUSG00000045322(Tlr9)	ENSMUSG00000026883(Dab2ip),ENSMUSG00000038065(Mturn)
BP	GO:0002606	positive regulation of dendritic cell antigen processing and presentation	3	0	3	7	0.000201081	0.00456819	ENSMUSG00000024610(Cd74),ENSMUSG00000037944(Ccr7),ENSMUSG00000038058(Nod1)	-
BP	GO:0039530	MDA-5 signaling pathway	3	0	3	7	0.000201081	0.00456819	ENSMUSG00000017830(Dhx58),ENSMUSG00000026896(Ifih1),ENSMUSG00000037921(Ddx60)	-
BP	GO:0060332	positive regulation of response to interferon-gamma	3	0	3	7	0.000201081	0.00456819	ENSMUSG00000046879(Irgm1),ENSMUSG00000069874(Irgm2),ENSMUSG00000074151(Nlrc5)	-
BP	GO:0060335	positive regulation of interferon-gamma-mediated signaling pathway	3	0	3	7	0.000201081	0.00456819	ENSMUSG00000046879(Irgm1),ENSMUSG00000069874(Irgm2),ENSMUSG00000074151(Nlrc5)	-
BP	GO:2000659	regulation of interleukin-1-mediated signaling pathway	3	0	3	7	0.000201081	0.00456819	ENSMUSG00000026981(Il1rn),ENSMUSG00000027514(Zbp1),ENSMUSG00000064090(Vrk2)	-
MF	GO:0042605	peptide antigen binding	4	0	4	17	0.000201346	0.00456819	ENSMUSG00000035929(H2-Q4),ENSMUSG00000036594(H2-Aa),ENSMUSG00000037321(Tap1),ENSMUSG00000073421(H2-Ab1)	-
BP	GO:0002440	production of molecular mediator of immune response	12	0	12	190	0.000206241	0.00466151	ENSMUSG00000015316(Slamf1),ENSMUSG00000020641(Rsad2),ENSMUSG00000022901(Cd86),ENSMUSG00000024610(Cd74),ENSMUSG00000027639(Samhd1),ENSMUSG00000031639(Tlr3),ENSMUSG00000037447(Arid5a),ENSMUSG00000040296(Ddx58),ENSMUSG00000045322(Tlr9),ENSMUSG00000048806(Ifnb1),ENSMUSG00000057135(Scimp),ENSMUSG00000073421(H2-Ab1)	-
BP	GO:0051171	regulation of nitrogen compound metabolic process	113	25	138	5810	0.000209517	0.00471769	ENSMUSG00000000184(Ccnd2),ENSMUSG00000000247(Lhx2),ENSMUSG00000001156(Mxd1),ENSMUSG00000001552(Jup),ENSMUSG00000002227(Mov10),ENSMUSG00000002307(Daxx),ENSMUSG00000004040(Stat3),ENSMUSG00000004698(Hdac9),ENSMUSG00000006310(Zbtb32),ENSMUSG00000009185(Ccl8),ENSMUSG00000012519(Mlkl),ENSMUSG00000014773(Dll1),ENSMUSG00000015316(Slamf1),ENSMUSG00000015947(Fcgr1),ENSMUSG00000019979(Apaf1),ENSMUSG00000020…	ENSMUSG00000000983(Wfdc18),ENSMUSG00000016984(Etaa1),ENSMUSG00000025764(Jade1),ENSMUSG00000026873(Phf19),ENSMUSG00000026883(Dab2ip),ENSMUSG00000026975(Dph7),ENSMUSG00000030145(Zfp248),ENSMUSG00000031671(Setd6),ENSMUSG00000034758(Tle6),ENSMUSG00000034800(Zfp661),ENSMUSG00000034957(Cebpa),ENSMUSG00000036867(Smad6),ENSMUSG00000038065(Mturn),ENSMUSG00000038797(Zscan2),ENSMUSG00000042745(Id1),ENSMUSG0…
BP	GO:0035743	CD4-positive, alpha-beta T cell cytokine production	4	0	4	17	0.000216947	0.00486663	ENSMUSG00000015316(Slamf1),ENSMUSG00000020641(Rsad2),ENSMUSG00000037447(Arid5a),ENSMUSG00000048806(Ifnb1)	-
BP	GO:0071674	mononuclear cell migration	8	0	8	89	0.000225883	0.0050481	ENSMUSG00000009185(Ccl8),ENSMUSG00000015316(Slamf1),ENSMUSG00000020717(Pecam1),ENSMUSG00000024397(Aif1),ENSMUSG00000034855(Cxcl10),ENSMUSG00000035352(Ccl12),ENSMUSG00000037944(Ccr7),ENSMUSG00000048534(Jaml)	-
BP	GO:0050870	positive regulation of T cell activation	12	0	12	193	0.000238385	0.00530284	ENSMUSG00000015316(Slamf1),ENSMUSG00000022901(Cd86),ENSMUSG00000024397(Aif1),ENSMUSG00000024610(Cd74),ENSMUSG00000026770(Il2ra),ENSMUSG00000029204(Rhoh),ENSMUSG00000031712(Il15),ENSMUSG00000036594(H2-Aa),ENSMUSG00000037944(Ccr7),ENSMUSG00000073421(H2-Ab1),ENSMUSG00000095028(Sirpb1b),ENSMUSG00000095788(Sirpb1a)	-
BP	GO:0010948	negative regulation of cell cycle process	7	6	13	222	0.000239186	0.00530284	ENSMUSG00000020415(Pttg1),ENSMUSG00000021127(Zfp36l1),ENSMUSG00000027641(Rbl1),ENSMUSG00000035352(Ccl12),ENSMUSG00000036986(Pml),ENSMUSG00000049488(Tmem67),ENSMUSG00000078763(Slfn1)	ENSMUSG00000024056(Ndc80),ENSMUSG00000025764(Jade1),ENSMUSG00000026883(Dab2ip),ENSMUSG00000027379(Bub1),ENSMUSG00000052934(Fbxo31),ENSMUSG00000072082(Ccnf)
BP	GO:0000165	MAPK cascade	26	3	29	777	0.000240836	0.00530284	ENSMUSG00000009185(Ccl8),ENSMUSG00000012519(Mlkl),ENSMUSG00000015316(Slamf1),ENSMUSG00000021127(Zfp36l1),ENSMUSG00000021367(Edn1),ENSMUSG00000024079(Eif2ak2),ENSMUSG00000024610(Cd74),ENSMUSG00000026121(Sema4c),ENSMUSG00000026360(Rgs2),ENSMUSG00000026981(Il1rn),ENSMUSG00000031639(Tlr3),ENSMUSG00000033470(Cysltr2),ENSMUSG00000034765(Dusp5),ENSMUSG00000034997(Htr2a),ENSMUSG00000035299(Mid1),ENSMUSG0…	ENSMUSG00000026883(Dab2ip),ENSMUSG00000038065(Mturn),ENSMUSG00000042745(Id1)
BP	GO:0023014	signal transduction by protein phosphorylation	26	3	29	777	0.000240836	0.00530284	ENSMUSG00000009185(Ccl8),ENSMUSG00000012519(Mlkl),ENSMUSG00000015316(Slamf1),ENSMUSG00000021127(Zfp36l1),ENSMUSG00000021367(Edn1),ENSMUSG00000024079(Eif2ak2),ENSMUSG00000024610(Cd74),ENSMUSG00000026121(Sema4c),ENSMUSG00000026360(Rgs2),ENSMUSG00000026981(Il1rn),ENSMUSG00000031639(Tlr3),ENSMUSG00000033470(Cysltr2),ENSMUSG00000034765(Dusp5),ENSMUSG00000034997(Htr2a),ENSMUSG00000035299(Mid1),ENSMUSG0…	ENSMUSG00000026883(Dab2ip),ENSMUSG00000038065(Mturn),ENSMUSG00000042745(Id1)
BP	GO:0010647	positive regulation of cell communication	50	3	53	1769	0.000245172	0.00537195	ENSMUSG00000002104(Rapsn),ENSMUSG00000004040(Stat3),ENSMUSG00000009185(Ccl8),ENSMUSG00000010358(Ifi35),ENSMUSG00000012519(Mlkl),ENSMUSG00000014773(Dll1),ENSMUSG00000015316(Slamf1),ENSMUSG00000016524(Il19),ENSMUSG00000017314(Mpp2),ENSMUSG00000017830(Dhx58),ENSMUSG00000019979(Apaf1),ENSMUSG00000020641(Rsad2),ENSMUSG00000020717(Pecam1),ENSMUSG00000021367(Edn1),ENSMUSG00000021423(Ly86),ENSMUSG0000002…	ENSMUSG00000026409(Pfkfb2),ENSMUSG00000026883(Dab2ip),ENSMUSG00000038065(Mturn)
MF	GO:0140375	immune receptor activity	9	0	9	116	0.000245775	0.00537195	ENSMUSG00000015947(Fcgr1),ENSMUSG00000023206(Il15ra),ENSMUSG00000024610(Cd74),ENSMUSG00000026770(Il2ra),ENSMUSG00000030149(Klrk1),ENSMUSG00000030745(Il21r),ENSMUSG00000037944(Ccr7),ENSMUSG00000059089(Fcgr4),ENSMUSG00000079227(Ccr5)	-
BP	GO:0098609	cell-cell adhesion	28	2	30	817	0.000248555	0.00541287	ENSMUSG00000001552(Jup),ENSMUSG00000006411(Nectin4),ENSMUSG00000015316(Slamf1),ENSMUSG00000020717(Pecam1),ENSMUSG00000021127(Zfp36l1),ENSMUSG00000022901(Cd86),ENSMUSG00000024397(Aif1),ENSMUSG00000024610(Cd74),ENSMUSG00000026581(Sell),ENSMUSG00000026770(Il2ra),ENSMUSG00000026981(Il1rn),ENSMUSG00000029204(Rhoh),ENSMUSG00000031628(Casp3),ENSMUSG00000031712(Il15),ENSMUSG00000033487(Fndc3a),ENSMUSG000…	ENSMUSG00000023915(Tnfrsf21),ENSMUSG00000056501(Cebpb)
BP	GO:0030155	regulation of cell adhesion	25	2	27	705	0.000263209	0.00569914	ENSMUSG00000001552(Jup),ENSMUSG00000001768(Rin2),ENSMUSG00000014773(Dll1),ENSMUSG00000015316(Slamf1),ENSMUSG00000022901(Cd86),ENSMUSG00000024397(Aif1),ENSMUSG00000024610(Cd74),ENSMUSG00000026770(Il2ra),ENSMUSG00000026981(Il1rn),ENSMUSG00000029204(Rhoh),ENSMUSG00000030671(Pde3b),ENSMUSG00000031628(Casp3),ENSMUSG00000031712(Il15),ENSMUSG00000036594(H2-Aa),ENSMUSG00000036986(Pml),ENSMUSG00000037944(…	ENSMUSG00000023915(Tnfrsf21),ENSMUSG00000056501(Cebpb)
CC	GO:0043227	membrane-bounded organelle	199	48	247	11414	0.00026361	0.00569914	ENSMUSG00000000184(Ccnd2),ENSMUSG00000000247(Lhx2),ENSMUSG00000001128(Cfp),ENSMUSG00000001156(Mxd1),ENSMUSG00000001552(Jup),ENSMUSG00000002104(Rapsn),ENSMUSG00000002227(Mov10),ENSMUSG00000002307(Daxx),ENSMUSG00000004040(Stat3),ENSMUSG00000004698(Hdac9),ENSMUSG00000006310(Zbtb32),ENSMUSG00000010358(Ifi35),ENSMUSG00000012519(Mlkl),ENSMUSG00000014773(Dll1),ENSMUSG00000015222(Map2),ENSMUSG00000015316…	ENSMUSG00000006641(Slc5a6),ENSMUSG00000009566(Fpgs),ENSMUSG00000016984(Etaa1),ENSMUSG00000019158(Tmem160),ENSMUSG00000020974(Pole2),ENSMUSG00000024056(Ndc80),ENSMUSG00000025732(Mcrip2),ENSMUSG00000025764(Jade1),ENSMUSG00000025931(Paqr8),ENSMUSG00000026409(Pfkfb2),ENSMUSG00000026785(Pkn3),ENSMUSG00000026873(Phf19),ENSMUSG00000026883(Dab2ip),ENSMUSG00000027379(Bub1),ENSMUSG00000027999(Pla2g12a),ENS…
BP	GO:0023056	positive regulation of signaling	50	3	53	1775	0.000266234	0.00573509	ENSMUSG00000002104(Rapsn),ENSMUSG00000004040(Stat3),ENSMUSG00000009185(Ccl8),ENSMUSG00000010358(Ifi35),ENSMUSG00000012519(Mlkl),ENSMUSG00000014773(Dll1),ENSMUSG00000015316(Slamf1),ENSMUSG00000016524(Il19),ENSMUSG00000017314(Mpp2),ENSMUSG00000017830(Dhx58),ENSMUSG00000019979(Apaf1),ENSMUSG00000020641(Rsad2),ENSMUSG00000020717(Pecam1),ENSMUSG00000021367(Edn1),ENSMUSG00000021423(Ly86),ENSMUSG0000002…	ENSMUSG00000026409(Pfkfb2),ENSMUSG00000026883(Dab2ip),ENSMUSG00000038065(Mturn)
BP	GO:0034349	glial cell apoptotic process	3	1	4	18	0.000274925	0.00590099	ENSMUSG00000014773(Dll1),ENSMUSG00000031628(Casp3),ENSMUSG00000035352(Ccl12)	ENSMUSG00000023915(Tnfrsf21)
BP	GO:0050790	regulation of catalytic activity	59	7	66	2361	0.000289364	0.00618865	ENSMUSG00000000184(Ccnd2),ENSMUSG00000001768(Rin2),ENSMUSG00000002307(Daxx),ENSMUSG00000004040(Stat3),ENSMUSG00000004698(Hdac9),ENSMUSG00000009185(Ccl8),ENSMUSG00000012519(Mlkl),ENSMUSG00000014361(Mertk),ENSMUSG00000015222(Map2),ENSMUSG00000015316(Slamf1),ENSMUSG00000015377(Dennd6b),ENSMUSG00000015947(Fcgr1),ENSMUSG00000019979(Apaf1),ENSMUSG00000020415(Pttg1),ENSMUSG00000020709(Adap2),ENSMUSG0000…	ENSMUSG00000000983(Wfdc18),ENSMUSG00000016984(Etaa1),ENSMUSG00000026409(Pfkfb2),ENSMUSG00000026883(Dab2ip),ENSMUSG00000039831(Arhgap29),ENSMUSG00000066839(Ecsit),ENSMUSG00000072082(Ccnf)
BP	GO:0002819	regulation of adaptive immune response	11	0	11	170	0.000305798	0.00651677	ENSMUSG00000015316(Slamf1),ENSMUSG00000015947(Fcgr1),ENSMUSG00000020641(Rsad2),ENSMUSG00000022876(Samsn1),ENSMUSG00000024610(Cd74),ENSMUSG00000025498(Irf7),ENSMUSG00000037447(Arid5a),ENSMUSG00000037944(Ccr7),ENSMUSG00000044701(Il27),ENSMUSG00000048806(Ifnb1),ENSMUSG00000073421(H2-Ab1)	-
BP	GO:2001198	regulation of dendritic cell differentiation	2	1	3	8	0.000317366	0.00673924	ENSMUSG00000023367(Tmem176a),ENSMUSG00000029810(Tmem176b)	ENSMUSG00000056501(Cebpb)
MF	GO:0019770	IgG receptor activity	2	0	2	2	0.000320818	0.00676438	ENSMUSG00000015947(Fcgr1),ENSMUSG00000059089(Fcgr4)	-
MF	GO:0140037	sumo-dependent protein binding	2	0	2	2	0.000320818	0.00676438	ENSMUSG00000002307(Daxx),ENSMUSG00000036986(Pml)	-
BP	GO:0071887	leukocyte apoptotic process	8	1	9	118	0.000322463	0.00677512	ENSMUSG00000014361(Mertk),ENSMUSG00000024610(Cd74),ENSMUSG00000026770(Il2ra),ENSMUSG00000031628(Casp3),ENSMUSG00000037944(Ccr7),ENSMUSG00000062007(Hsh2d),ENSMUSG00000062232(Rapgef2),ENSMUSG00000079227(Ccr5)	ENSMUSG00000023915(Tnfrsf21)
BP	GO:0043408	regulation of MAPK cascade	24	3	27	715	0.000328237	0.00687225	ENSMUSG00000009185(Ccl8),ENSMUSG00000012519(Mlkl),ENSMUSG00000015316(Slamf1),ENSMUSG00000021367(Edn1),ENSMUSG00000024079(Eif2ak2),ENSMUSG00000024610(Cd74),ENSMUSG00000026121(Sema4c),ENSMUSG00000026360(Rgs2),ENSMUSG00000026981(Il1rn),ENSMUSG00000031639(Tlr3),ENSMUSG00000033470(Cysltr2),ENSMUSG00000034765(Dusp5),ENSMUSG00000034997(Htr2a),ENSMUSG00000035299(Mid1),ENSMUSG00000035352(Ccl12),ENSMUSG000…	ENSMUSG00000026883(Dab2ip),ENSMUSG00000038065(Mturn),ENSMUSG00000042745(Id1)
MF	GO:0003677	DNA binding	46	19	65	2376	0.000332858	0.00694462	ENSMUSG00000000247(Lhx2),ENSMUSG00000001156(Mxd1),ENSMUSG00000004040(Stat3),ENSMUSG00000006310(Zbtb32),ENSMUSG00000017830(Dhx58),ENSMUSG00000021127(Zfp36l1),ENSMUSG00000024238(Zeb1),ENSMUSG00000025498(Irf7),ENSMUSG00000026104(Stat1),ENSMUSG00000026222(Sp100),ENSMUSG00000026535(Ifi202b),ENSMUSG00000026536(Ifi211),ENSMUSG00000026896(Ifih1),ENSMUSG00000027514(Zbp1),ENSMUSG00000027639(Samhd1),ENSMUSG…	ENSMUSG00000020974(Pole2),ENSMUSG00000026873(Phf19),ENSMUSG00000028933(Xrcc2),ENSMUSG00000030145(Zfp248),ENSMUSG00000030322(Mbd4),ENSMUSG00000032898(Fbxo21),ENSMUSG00000034800(Zfp661),ENSMUSG00000034957(Cebpa),ENSMUSG00000036867(Smad6),ENSMUSG00000038644(Pold1),ENSMUSG00000038797(Zscan2),ENSMUSG00000043866(Taf10),ENSMUSG00000056501(Cebpb),ENSMUSG00000069206(Zfp874a),ENSMUSG00000069272(H2ac8),ENSM…
BP	GO:0071360	cellular response to exogenous dsRNA	4	0	4	19	0.000343237	0.00711355	ENSMUSG00000026896(Ifih1),ENSMUSG00000031639(Tlr3),ENSMUSG00000040296(Ddx58),ENSMUSG00000079339(Ifit1bl1)	-
BP	GO:0032677	regulation of interleukin-8 production	7	0	7	72	0.000343339	0.00711355	ENSMUSG00000004040(Stat3),ENSMUSG00000024610(Cd74),ENSMUSG00000031639(Tlr3),ENSMUSG00000038058(Nod1),ENSMUSG00000040296(Ddx58),ENSMUSG00000044583(Tlr7),ENSMUSG00000045322(Tlr9)	-
BP	GO:0080090	regulation of primary metabolic process	113	27	140	5975	0.000347918	0.00718348	ENSMUSG00000000184(Ccnd2),ENSMUSG00000000247(Lhx2),ENSMUSG00000001156(Mxd1),ENSMUSG00000001552(Jup),ENSMUSG00000002227(Mov10),ENSMUSG00000002307(Daxx),ENSMUSG00000004040(Stat3),ENSMUSG00000004698(Hdac9),ENSMUSG00000006310(Zbtb32),ENSMUSG00000009185(Ccl8),ENSMUSG00000012519(Mlkl),ENSMUSG00000014773(Dll1),ENSMUSG00000015316(Slamf1),ENSMUSG00000015947(Fcgr1),ENSMUSG00000019979(Apaf1),ENSMUSG00000020…	ENSMUSG00000000983(Wfdc18),ENSMUSG00000002769(Gnmt),ENSMUSG00000016984(Etaa1),ENSMUSG00000025764(Jade1),ENSMUSG00000026409(Pfkfb2),ENSMUSG00000026873(Phf19),ENSMUSG00000026883(Dab2ip),ENSMUSG00000026975(Dph7),ENSMUSG00000030145(Zfp248),ENSMUSG00000031671(Setd6),ENSMUSG00000034758(Tle6),ENSMUSG00000034800(Zfp661),ENSMUSG00000034957(Cebpa),ENSMUSG00000036867(Smad6),ENSMUSG00000038065(Mturn),ENSMUSG…
BP	GO:0042981	regulation of apoptotic process	41	6	47	1535	0.000351966	0.00724201	ENSMUSG00000000184(Ccnd2),ENSMUSG00000002104(Rapsn),ENSMUSG00000014361(Mertk),ENSMUSG00000014773(Dll1),ENSMUSG00000016524(Il19),ENSMUSG00000019979(Apaf1),ENSMUSG00000021127(Zfp36l1),ENSMUSG00000021367(Edn1),ENSMUSG00000022684(Bfar),ENSMUSG00000024079(Eif2ak2),ENSMUSG00000024397(Aif1),ENSMUSG00000024610(Cd74),ENSMUSG00000024887(Asah2),ENSMUSG00000026222(Sp100),ENSMUSG00000026535(Ifi202b),ENSMUSG00…	ENSMUSG00000026883(Dab2ip),ENSMUSG00000028933(Xrcc2),ENSMUSG00000036867(Smad6),ENSMUSG00000042745(Id1),ENSMUSG00000048232(Fbxo10),ENSMUSG00000056501(Cebpb)
BP	GO:0010941	regulation of cell death	45	6	51	1709	0.000356025	0.00730035	ENSMUSG00000000184(Ccnd2),ENSMUSG00000002104(Rapsn),ENSMUSG00000002307(Daxx),ENSMUSG00000004040(Stat3),ENSMUSG00000014361(Mertk),ENSMUSG00000014773(Dll1),ENSMUSG00000016524(Il19),ENSMUSG00000019979(Apaf1),ENSMUSG00000021127(Zfp36l1),ENSMUSG00000021367(Edn1),ENSMUSG00000022684(Bfar),ENSMUSG00000024079(Eif2ak2),ENSMUSG00000024397(Aif1),ENSMUSG00000024610(Cd74),ENSMUSG00000024887(Asah2),ENSMUSG00000…	ENSMUSG00000026883(Dab2ip),ENSMUSG00000028933(Xrcc2),ENSMUSG00000036867(Smad6),ENSMUSG00000042745(Id1),ENSMUSG00000048232(Fbxo10),ENSMUSG00000056501(Cebpb)
BP	GO:0032655	regulation of interleukin-12 production	6	0	6	52	0.000359829	0.00735308	ENSMUSG00000015316(Slamf1),ENSMUSG00000031639(Tlr3),ENSMUSG00000037944(Ccr7),ENSMUSG00000041515(Irf8),ENSMUSG00000045322(Tlr9),ENSMUSG00000057135(Scimp)	-
BP	GO:0050766	positive regulation of phagocytosis	7	0	7	73	0.000373879	0.00761412	ENSMUSG00000014361(Mertk),ENSMUSG00000015947(Fcgr1),ENSMUSG00000023206(Il15ra),ENSMUSG00000031712(Il15),ENSMUSG00000037944(Ccr7),ENSMUSG00000095028(Sirpb1b),ENSMUSG00000095788(Sirpb1a)	-
BP	GO:0051090	regulation of DNA-binding transcription factor activity	14	4	18	395	0.000384806	0.00780999	ENSMUSG00000001552(Jup),ENSMUSG00000004040(Stat3),ENSMUSG00000021367(Edn1),ENSMUSG00000024079(Eif2ak2),ENSMUSG00000030921(Trim30a),ENSMUSG00000031639(Tlr3),ENSMUSG00000033871(Ppargc1b),ENSMUSG00000037860(Aim2),ENSMUSG00000038058(Nod1),ENSMUSG00000040296(Ddx58),ENSMUSG00000045322(Tlr9),ENSMUSG00000057596(Trim30d),ENSMUSG00000074151(Nlrc5),ENSMUSG00000078616(Trim30c)	ENSMUSG00000026883(Dab2ip),ENSMUSG00000031671(Setd6),ENSMUSG00000038065(Mturn),ENSMUSG00000042745(Id1)
BP	GO:0051241	negative regulation of multicellular organismal process	35	6	41	1287	0.000390106	0.0078797	ENSMUSG00000000247(Lhx2),ENSMUSG00000001552(Jup),ENSMUSG00000004040(Stat3),ENSMUSG00000004698(Hdac9),ENSMUSG00000014361(Mertk),ENSMUSG00000014773(Dll1),ENSMUSG00000015222(Map2),ENSMUSG00000015316(Slamf1),ENSMUSG00000016524(Il19),ENSMUSG00000017830(Dhx58),ENSMUSG00000021127(Zfp36l1),ENSMUSG00000022901(Cd86),ENSMUSG00000023206(Il15ra),ENSMUSG00000023367(Tmem176a),ENSMUSG00000024610(Cd74),ENSMUSG000…	ENSMUSG00000001227(Sema6b),ENSMUSG00000023915(Tnfrsf21),ENSMUSG00000026883(Dab2ip),ENSMUSG00000036867(Smad6),ENSMUSG00000037098(Rab11fip3),ENSMUSG00000042745(Id1)
CC	GO:0009897	external side of plasma membrane	19	0	19	421	0.000390882	0.0078797	ENSMUSG00000015316(Slamf1),ENSMUSG00000015947(Fcgr1),ENSMUSG00000020717(Pecam1),ENSMUSG00000022901(Cd86),ENSMUSG00000024610(Cd74),ENSMUSG00000026581(Sell),ENSMUSG00000026770(Il2ra),ENSMUSG00000029417(Cxcl9),ENSMUSG00000030149(Klrk1),ENSMUSG00000034855(Cxcl10),ENSMUSG00000035929(H2-Q4),ENSMUSG00000036594(H2-Aa),ENSMUSG00000037944(Ccr7),ENSMUSG00000053835(H2-T24),ENSMUSG00000056116(H2-T22),ENSMUSG0…	-
BP	GO:0032615	interleukin-12 production	6	0	6	53	0.000399592	0.00802818	ENSMUSG00000015316(Slamf1),ENSMUSG00000031639(Tlr3),ENSMUSG00000037944(Ccr7),ENSMUSG00000041515(Irf8),ENSMUSG00000045322(Tlr9),ENSMUSG00000057135(Scimp)	-
BP	GO:0065009	regulation of molecular function	68	12	80	3039	0.000402911	0.00805048	ENSMUSG00000000184(Ccnd2),ENSMUSG00000000247(Lhx2),ENSMUSG00000001552(Jup),ENSMUSG00000001768(Rin2),ENSMUSG00000002307(Daxx),ENSMUSG00000004040(Stat3),ENSMUSG00000004698(Hdac9),ENSMUSG00000009185(Ccl8),ENSMUSG00000012519(Mlkl),ENSMUSG00000014361(Mertk),ENSMUSG00000015222(Map2),ENSMUSG00000015316(Slamf1),ENSMUSG00000015377(Dennd6b),ENSMUSG00000015947(Fcgr1),ENSMUSG00000019979(Apaf1),ENSMUSG0000002…	ENSMUSG00000000983(Wfdc18),ENSMUSG00000016984(Etaa1),ENSMUSG00000022494(Shisa9),ENSMUSG00000026409(Pfkfb2),ENSMUSG00000026883(Dab2ip),ENSMUSG00000031671(Setd6),ENSMUSG00000038065(Mturn),ENSMUSG00000039831(Arhgap29),ENSMUSG00000042745(Id1),ENSMUSG00000043866(Taf10),ENSMUSG00000066839(Ecsit),ENSMUSG00000072082(Ccnf)
BP	GO:0042327	positive regulation of phosphorylation	32	4	36	1082	0.000404698	0.00805048	ENSMUSG00000000184(Ccnd2),ENSMUSG00000002307(Daxx),ENSMUSG00000009185(Ccl8),ENSMUSG00000012519(Mlkl),ENSMUSG00000014361(Mertk),ENSMUSG00000015316(Slamf1),ENSMUSG00000015947(Fcgr1),ENSMUSG00000020717(Pecam1),ENSMUSG00000021367(Edn1),ENSMUSG00000022901(Cd86),ENSMUSG00000024079(Eif2ak2),ENSMUSG00000024397(Aif1),ENSMUSG00000024610(Cd74),ENSMUSG00000026121(Sema4c),ENSMUSG00000026981(Il1rn),ENSMUSG0000…	ENSMUSG00000016984(Etaa1),ENSMUSG00000026409(Pfkfb2),ENSMUSG00000026883(Dab2ip),ENSMUSG00000038065(Mturn)
BP	GO:0045580	regulation of T cell differentiation	10	0	10	148	0.00040475	0.00805048	ENSMUSG00000024238(Zeb1),ENSMUSG00000024610(Cd74),ENSMUSG00000026770(Il2ra),ENSMUSG00000029204(Rhoh),ENSMUSG00000031712(Il15),ENSMUSG00000036594(H2-Aa),ENSMUSG00000037944(Ccr7),ENSMUSG00000039899(Fgl2),ENSMUSG00000044701(Il27),ENSMUSG00000048806(Ifnb1)	-
BP	GO:0032735	positive regulation of interleukin-12 production	5	0	5	35	0.000411667	0.00816084	ENSMUSG00000031639(Tlr3),ENSMUSG00000037944(Ccr7),ENSMUSG00000041515(Irf8),ENSMUSG00000045322(Tlr9),ENSMUSG00000057135(Scimp)	-
BP	GO:0060255	regulation of macromolecule metabolic process	121	26	147	6357	0.000415969	0.00821883	ENSMUSG00000000184(Ccnd2),ENSMUSG00000000247(Lhx2),ENSMUSG00000001156(Mxd1),ENSMUSG00000001552(Jup),ENSMUSG00000002227(Mov10),ENSMUSG00000002307(Daxx),ENSMUSG00000004040(Stat3),ENSMUSG00000004698(Hdac9),ENSMUSG00000006310(Zbtb32),ENSMUSG00000009185(Ccl8),ENSMUSG00000012519(Mlkl),ENSMUSG00000014361(Mertk),ENSMUSG00000014773(Dll1),ENSMUSG00000015316(Slamf1),ENSMUSG00000015947(Fcgr1),ENSMUSG00000017…	ENSMUSG00000000983(Wfdc18),ENSMUSG00000016984(Etaa1),ENSMUSG00000023915(Tnfrsf21),ENSMUSG00000025764(Jade1),ENSMUSG00000026873(Phf19),ENSMUSG00000026883(Dab2ip),ENSMUSG00000026975(Dph7),ENSMUSG00000030145(Zfp248),ENSMUSG00000031671(Setd6),ENSMUSG00000034758(Tle6),ENSMUSG00000034800(Zfp661),ENSMUSG00000034957(Cebpa),ENSMUSG00000036867(Smad6),ENSMUSG00000038065(Mturn),ENSMUSG00000038797(Zscan2),ENS…
BP	GO:0007252	I-kappaB phosphorylation	3	1	4	20	0.00042289	0.008328	ENSMUSG00000031639(Tlr3),ENSMUSG00000044583(Tlr7),ENSMUSG00000045322(Tlr9)	ENSMUSG00000026883(Dab2ip)
BP	GO:0019222	regulation of metabolic process	126	30	156	6826	0.00042716	0.00838442	ENSMUSG00000000184(Ccnd2),ENSMUSG00000000247(Lhx2),ENSMUSG00000001156(Mxd1),ENSMUSG00000001552(Jup),ENSMUSG00000002227(Mov10),ENSMUSG00000002307(Daxx),ENSMUSG00000004040(Stat3),ENSMUSG00000004698(Hdac9),ENSMUSG00000006310(Zbtb32),ENSMUSG00000009185(Ccl8),ENSMUSG00000012519(Mlkl),ENSMUSG00000014361(Mertk),ENSMUSG00000014773(Dll1),ENSMUSG00000015316(Slamf1),ENSMUSG00000015947(Fcgr1),ENSMUSG00000017…	ENSMUSG00000000983(Wfdc18),ENSMUSG00000002769(Gnmt),ENSMUSG00000016984(Etaa1),ENSMUSG00000023915(Tnfrsf21),ENSMUSG00000025764(Jade1),ENSMUSG00000026409(Pfkfb2),ENSMUSG00000026873(Phf19),ENSMUSG00000026883(Dab2ip),ENSMUSG00000026975(Dph7),ENSMUSG00000030145(Zfp248),ENSMUSG00000031671(Setd6),ENSMUSG00000034758(Tle6),ENSMUSG00000034800(Zfp661),ENSMUSG00000034957(Cebpa),ENSMUSG00000036867(Smad6),ENSM…
BP	GO:0045786	negative regulation of cell cycle	11	8	19	434	0.000438392	0.00857668	ENSMUSG00000020415(Pttg1),ENSMUSG00000020464(Pnpt1),ENSMUSG00000021127(Zfp36l1),ENSMUSG00000027641(Rbl1),ENSMUSG00000031628(Casp3),ENSMUSG00000035352(Ccl12),ENSMUSG00000036986(Pml),ENSMUSG00000039994(Timeless),ENSMUSG00000049488(Tmem67),ENSMUSG00000060675(Plaat3),ENSMUSG00000078763(Slfn1)	ENSMUSG00000016984(Etaa1),ENSMUSG00000024056(Ndc80),ENSMUSG00000025764(Jade1),ENSMUSG00000026883(Dab2ip),ENSMUSG00000027379(Bub1),ENSMUSG00000034957(Cebpa),ENSMUSG00000052934(Fbxo31),ENSMUSG00000072082(Ccnf)
BP	GO:2000134	negative regulation of G1/S transition of mitotic cell cycle	4	2	6	54	0.000442706	0.00863276	ENSMUSG00000027641(Rbl1),ENSMUSG00000035352(Ccl12),ENSMUSG00000036986(Pml),ENSMUSG00000078763(Slfn1)	ENSMUSG00000025764(Jade1),ENSMUSG00000052934(Fbxo31)
BP	GO:0051251	positive regulation of lymphocyte activation	14	0	14	268	0.000447301	0.00869396	ENSMUSG00000015316(Slamf1),ENSMUSG00000022901(Cd86),ENSMUSG00000023206(Il15ra),ENSMUSG00000024397(Aif1),ENSMUSG00000024610(Cd74),ENSMUSG00000026770(Il2ra),ENSMUSG00000029204(Rhoh),ENSMUSG00000031712(Il15),ENSMUSG00000036594(H2-Aa),ENSMUSG00000037944(Ccr7),ENSMUSG00000045322(Tlr9),ENSMUSG00000073421(H2-Ab1),ENSMUSG00000095028(Sirpb1b),ENSMUSG00000095788(Sirpb1a)	-
BP	GO:1902533	positive regulation of intracellular signal transduction	31	2	33	968	0.000464544	0.00899978	ENSMUSG00000009185(Ccl8),ENSMUSG00000010358(Ifi35),ENSMUSG00000012519(Mlkl),ENSMUSG00000015316(Slamf1),ENSMUSG00000016524(Il19),ENSMUSG00000017830(Dhx58),ENSMUSG00000021367(Edn1),ENSMUSG00000022901(Cd86),ENSMUSG00000024079(Eif2ak2),ENSMUSG00000024610(Cd74),ENSMUSG00000026121(Sema4c),ENSMUSG00000026981(Il1rn),ENSMUSG00000030921(Trim30a),ENSMUSG00000031639(Tlr3),ENSMUSG00000033470(Cysltr2),ENSMUSG0…	ENSMUSG00000026883(Dab2ip),ENSMUSG00000038065(Mturn)
BP	GO:0035556	intracellular signal transduction	60	7	67	2449	0.000470685	0.00908924	ENSMUSG00000009185(Ccl8),ENSMUSG00000010358(Ifi35),ENSMUSG00000012519(Mlkl),ENSMUSG00000014361(Mertk),ENSMUSG00000015316(Slamf1),ENSMUSG00000016524(Il19),ENSMUSG00000017830(Dhx58),ENSMUSG00000019979(Apaf1),ENSMUSG00000019990(Pde7b),ENSMUSG00000020709(Adap2),ENSMUSG00000020717(Pecam1),ENSMUSG00000021127(Zfp36l1),ENSMUSG00000021367(Edn1),ENSMUSG00000021886(Gpr65),ENSMUSG00000022901(Cd86),ENSMUSG000…	ENSMUSG00000024186(Rgs11),ENSMUSG00000026785(Pkn3),ENSMUSG00000026883(Dab2ip),ENSMUSG00000038065(Mturn),ENSMUSG00000039831(Arhgap29),ENSMUSG00000042745(Id1),ENSMUSG00000056501(Cebpb)
BP	GO:0032637	interleukin-8 production	7	0	7	76	0.000478745	0.00921507	ENSMUSG00000004040(Stat3),ENSMUSG00000024610(Cd74),ENSMUSG00000031639(Tlr3),ENSMUSG00000038058(Nod1),ENSMUSG00000040296(Ddx58),ENSMUSG00000044583(Tlr7),ENSMUSG00000045322(Tlr9)	-
MF	GO:0005126	cytokine receptor binding	13	2	15	308	0.000481192	0.00923238	ENSMUSG00000004040(Stat3),ENSMUSG00000009185(Ccl8),ENSMUSG00000026981(Il1rn),ENSMUSG00000029417(Cxcl9),ENSMUSG00000031628(Casp3),ENSMUSG00000031712(Il15),ENSMUSG00000034855(Cxcl10),ENSMUSG00000035352(Ccl12),ENSMUSG00000039304(Tnfsf10),ENSMUSG00000044701(Il27),ENSMUSG00000045322(Tlr9),ENSMUSG00000048806(Ifnb1),ENSMUSG00000050395(Tnfsf15)	ENSMUSG00000026883(Dab2ip),ENSMUSG00000036867(Smad6)
BP	GO:0046328	regulation of JNK cascade	9	2	11	180	0.000497129	0.00950759	ENSMUSG00000012519(Mlkl),ENSMUSG00000015316(Slamf1),ENSMUSG00000021367(Edn1),ENSMUSG00000026981(Il1rn),ENSMUSG00000031639(Tlr3),ENSMUSG00000037944(Ccr7),ENSMUSG00000038058(Nod1),ENSMUSG00000042901(Aida),ENSMUSG00000045322(Tlr9)	ENSMUSG00000026883(Dab2ip),ENSMUSG00000038065(Mturn)
BP	GO:0043067	regulation of programmed cell death	41	6	47	1560	0.000501568	0.00956185	ENSMUSG00000000184(Ccnd2),ENSMUSG00000002104(Rapsn),ENSMUSG00000014361(Mertk),ENSMUSG00000014773(Dll1),ENSMUSG00000016524(Il19),ENSMUSG00000019979(Apaf1),ENSMUSG00000021127(Zfp36l1),ENSMUSG00000021367(Edn1),ENSMUSG00000022684(Bfar),ENSMUSG00000024079(Eif2ak2),ENSMUSG00000024397(Aif1),ENSMUSG00000024610(Cd74),ENSMUSG00000024887(Asah2),ENSMUSG00000026222(Sp100),ENSMUSG00000026535(Ifi202b),ENSMUSG00…	ENSMUSG00000026883(Dab2ip),ENSMUSG00000028933(Xrcc2),ENSMUSG00000036867(Smad6),ENSMUSG00000042745(Id1),ENSMUSG00000048232(Fbxo10),ENSMUSG00000056501(Cebpb)
BP	GO:0031399	regulation of protein modification process	47	7	54	1868	0.000507663	0.00964721	ENSMUSG00000000184(Ccnd2),ENSMUSG00000002307(Daxx),ENSMUSG00000009185(Ccl8),ENSMUSG00000012519(Mlkl),ENSMUSG00000015316(Slamf1),ENSMUSG00000015947(Fcgr1),ENSMUSG00000020717(Pecam1),ENSMUSG00000021367(Edn1),ENSMUSG00000022876(Samsn1),ENSMUSG00000022901(Cd86),ENSMUSG00000024079(Eif2ak2),ENSMUSG00000024397(Aif1),ENSMUSG00000024610(Cd74),ENSMUSG00000026121(Sema4c),ENSMUSG00000026360(Rgs2),ENSMUSG0000…	ENSMUSG00000016984(Etaa1),ENSMUSG00000026873(Phf19),ENSMUSG00000026883(Dab2ip),ENSMUSG00000036867(Smad6),ENSMUSG00000038065(Mturn),ENSMUSG00000042745(Id1),ENSMUSG00000072082(Ccnf)
BP	GO:0050789	regulation of biological process	206	51	257	12354	0.000512788	0.00971368	ENSMUSG00000000184(Ccnd2),ENSMUSG00000000247(Lhx2),ENSMUSG00000001128(Cfp),ENSMUSG00000001156(Mxd1),ENSMUSG00000001552(Jup),ENSMUSG00000001768(Rin2),ENSMUSG00000002104(Rapsn),ENSMUSG00000002227(Mov10),ENSMUSG00000002307(Daxx),ENSMUSG00000004040(Stat3),ENSMUSG00000004698(Hdac9),ENSMUSG00000006310(Zbtb32),ENSMUSG00000009185(Ccl8),ENSMUSG00000010358(Ifi35),ENSMUSG00000012519(Mlkl),ENSMUSG00000014361…	ENSMUSG00000000983(Wfdc18),ENSMUSG00000001227(Sema6b),ENSMUSG00000002769(Gnmt),ENSMUSG00000016984(Etaa1),ENSMUSG00000022494(Shisa9),ENSMUSG00000023915(Tnfrsf21),ENSMUSG00000024056(Ndc80),ENSMUSG00000024186(Rgs11),ENSMUSG00000025764(Jade1),ENSMUSG00000025931(Paqr8),ENSMUSG00000026409(Pfkfb2),ENSMUSG00000026785(Pkn3),ENSMUSG00000026873(Phf19),ENSMUSG00000026883(Dab2ip),ENSMUSG00000026975(Dph7),ENSM…
BP	GO:1903708	positive regulation of hemopoiesis	11	1	12	211	0.000534818	0.0100989	ENSMUSG00000004040(Stat3),ENSMUSG00000021127(Zfp36l1),ENSMUSG00000023206(Il15ra),ENSMUSG00000024610(Cd74),ENSMUSG00000026770(Il2ra),ENSMUSG00000029204(Rhoh),ENSMUSG00000031712(Il15),ENSMUSG00000033871(Ppargc1b),ENSMUSG00000035692(Isg15),ENSMUSG00000036594(H2-Aa),ENSMUSG00000037944(Ccr7)	ENSMUSG00000038065(Mturn)
BP	GO:0071347	cellular response to interleukin-1	6	2	8	102	0.000571263	0.0107198	ENSMUSG00000009185(Ccl8),ENSMUSG00000021367(Edn1),ENSMUSG00000026981(Il1rn),ENSMUSG00000027514(Zbp1),ENSMUSG00000035352(Ccl12),ENSMUSG00000064090(Vrk2)	ENSMUSG00000026883(Dab2ip),ENSMUSG00000056501(Cebpb)
CC	GO:0043226	organelle	214	57	271	12861	0.000571291	0.0107198	ENSMUSG00000000184(Ccnd2),ENSMUSG00000000247(Lhx2),ENSMUSG00000001128(Cfp),ENSMUSG00000001156(Mxd1),ENSMUSG00000001552(Jup),ENSMUSG00000002104(Rapsn),ENSMUSG00000002227(Mov10),ENSMUSG00000002307(Daxx),ENSMUSG00000004040(Stat3),ENSMUSG00000004698(Hdac9),ENSMUSG00000005237(Dnah2),ENSMUSG00000006310(Zbtb32),ENSMUSG00000010358(Ifi35),ENSMUSG00000012519(Mlkl),ENSMUSG00000014361(Mertk),ENSMUSG000000147…	ENSMUSG00000006641(Slc5a6),ENSMUSG00000009566(Fpgs),ENSMUSG00000016984(Etaa1),ENSMUSG00000019158(Tmem160),ENSMUSG00000020974(Pole2),ENSMUSG00000022494(Shisa9),ENSMUSG00000022621(Rabl2),ENSMUSG00000024056(Ndc80),ENSMUSG00000025732(Mcrip2),ENSMUSG00000025764(Jade1),ENSMUSG00000025931(Paqr8),ENSMUSG00000026409(Pfkfb2),ENSMUSG00000026575(Nme7),ENSMUSG00000026785(Pkn3),ENSMUSG00000026873(Phf19),ENSMUS…
BP	GO:0010629	negative regulation of gene expression	48	10	58	2057	0.000575176	0.0107589	ENSMUSG00000000247(Lhx2),ENSMUSG00000001156(Mxd1),ENSMUSG00000002227(Mov10),ENSMUSG00000002307(Daxx),ENSMUSG00000004040(Stat3),ENSMUSG00000004698(Hdac9),ENSMUSG00000006310(Zbtb32),ENSMUSG00000014361(Mertk),ENSMUSG00000014773(Dll1),ENSMUSG00000015316(Slamf1),ENSMUSG00000017830(Dhx58),ENSMUSG00000020464(Pnpt1),ENSMUSG00000021127(Zfp36l1),ENSMUSG00000021367(Edn1),ENSMUSG00000024079(Eif2ak2),ENSMUSG0…	ENSMUSG00000023915(Tnfrsf21),ENSMUSG00000026873(Phf19),ENSMUSG00000026883(Dab2ip),ENSMUSG00000030145(Zfp248),ENSMUSG00000034758(Tle6),ENSMUSG00000034957(Cebpa),ENSMUSG00000042745(Id1),ENSMUSG00000056501(Cebpb),ENSMUSG00000069272(H2ac8),ENSMUSG00000074519(Zfp971)
BP	GO:1903039	positive regulation of leukocyte cell-cell adhesion	12	0	12	213	0.000581576	0.0108446	ENSMUSG00000015316(Slamf1),ENSMUSG00000022901(Cd86),ENSMUSG00000024397(Aif1),ENSMUSG00000024610(Cd74),ENSMUSG00000026770(Il2ra),ENSMUSG00000029204(Rhoh),ENSMUSG00000031712(Il15),ENSMUSG00000036594(H2-Aa),ENSMUSG00000037944(Ccr7),ENSMUSG00000073421(H2-Ab1),ENSMUSG00000095028(Sirpb1b),ENSMUSG00000095788(Sirpb1a)	-
BP	GO:0050830	defense response to Gram-positive bacterium	9	0	9	128	0.000586287	0.0108984	ENSMUSG00000028268(Gbp3),ENSMUSG00000028270(Gbp2),ENSMUSG00000029298(Gbp9),ENSMUSG00000030149(Klrk1),ENSMUSG00000038058(Nod1),ENSMUSG00000040253(Gbp7),ENSMUSG00000079363(Gbp4),ENSMUSG00000104713(Gbp6),ENSMUSG00000105096(Gbp10)	-
CC	GO:0098552	side of membrane	23	1	24	615	0.00059311	0.010991	ENSMUSG00000001552(Jup),ENSMUSG00000015316(Slamf1),ENSMUSG00000015947(Fcgr1),ENSMUSG00000020717(Pecam1),ENSMUSG00000022901(Cd86),ENSMUSG00000024610(Cd74),ENSMUSG00000026358(Rgs1),ENSMUSG00000026360(Rgs2),ENSMUSG00000026581(Sell),ENSMUSG00000026770(Il2ra),ENSMUSG00000027669(Gnb4),ENSMUSG00000029417(Cxcl9),ENSMUSG00000030149(Klrk1),ENSMUSG00000034855(Cxcl10),ENSMUSG00000035929(H2-Q4),ENSMUSG0000003…	ENSMUSG00000038607(Gng10)
BP	GO:0006909	phagocytosis	12	0	12	214	0.000606213	0.011199	ENSMUSG00000014361(Mertk),ENSMUSG00000015316(Slamf1),ENSMUSG00000015947(Fcgr1),ENSMUSG00000020717(Pecam1),ENSMUSG00000023206(Il15ra),ENSMUSG00000024397(Aif1),ENSMUSG00000029204(Rhoh),ENSMUSG00000031712(Il15),ENSMUSG00000037944(Ccr7),ENSMUSG00000041515(Irf8),ENSMUSG00000095028(Sirpb1b),ENSMUSG00000095788(Sirpb1a)	-
BP	GO:0032268	regulation of cellular protein metabolic process	62	9	71	2660	0.000624378	0.0114937	ENSMUSG00000000184(Ccnd2),ENSMUSG00000002227(Mov10),ENSMUSG00000002307(Daxx),ENSMUSG00000004040(Stat3),ENSMUSG00000009185(Ccl8),ENSMUSG00000012519(Mlkl),ENSMUSG00000015316(Slamf1),ENSMUSG00000015947(Fcgr1),ENSMUSG00000019979(Apaf1),ENSMUSG00000020415(Pttg1),ENSMUSG00000020717(Pecam1),ENSMUSG00000021127(Zfp36l1),ENSMUSG00000021367(Edn1),ENSMUSG00000022876(Samsn1),ENSMUSG00000022901(Cd86),ENSMUSG00…	ENSMUSG00000000983(Wfdc18),ENSMUSG00000016984(Etaa1),ENSMUSG00000026873(Phf19),ENSMUSG00000026883(Dab2ip),ENSMUSG00000026975(Dph7),ENSMUSG00000036867(Smad6),ENSMUSG00000038065(Mturn),ENSMUSG00000042745(Id1),ENSMUSG00000072082(Ccnf)
BP	GO:0043410	positive regulation of MAPK cascade	19	2	21	519	0.000626017	0.0114937	ENSMUSG00000009185(Ccl8),ENSMUSG00000012519(Mlkl),ENSMUSG00000015316(Slamf1),ENSMUSG00000021367(Edn1),ENSMUSG00000024079(Eif2ak2),ENSMUSG00000024610(Cd74),ENSMUSG00000026121(Sema4c),ENSMUSG00000026981(Il1rn),ENSMUSG00000031639(Tlr3),ENSMUSG00000033470(Cysltr2),ENSMUSG00000034997(Htr2a),ENSMUSG00000035299(Mid1),ENSMUSG00000035352(Ccl12),ENSMUSG00000037944(Ccr7),ENSMUSG00000038058(Nod1),ENSMUSG0000…	ENSMUSG00000026883(Dab2ip),ENSMUSG00000038065(Mturn)
BP	GO:0050777	negative regulation of immune response	10	0	10	157	0.000643813	0.0117842	ENSMUSG00000015316(Slamf1),ENSMUSG00000017830(Dhx58),ENSMUSG00000022876(Samsn1),ENSMUSG00000026535(Ifi202b),ENSMUSG00000026770(Il2ra),ENSMUSG00000027639(Samhd1),ENSMUSG00000037321(Tap1),ENSMUSG00000039899(Fgl2),ENSMUSG00000048806(Ifnb1),ENSMUSG00000074151(Nlrc5)	-
BP	GO:0010604	positive regulation of macromolecule metabolic process	77	12	89	3518	0.000657373	0.0119956	ENSMUSG00000000184(Ccnd2),ENSMUSG00000000247(Lhx2),ENSMUSG00000001552(Jup),ENSMUSG00000002227(Mov10),ENSMUSG00000002307(Daxx),ENSMUSG00000004040(Stat3),ENSMUSG00000009185(Ccl8),ENSMUSG00000012519(Mlkl),ENSMUSG00000014773(Dll1),ENSMUSG00000015316(Slamf1),ENSMUSG00000015947(Fcgr1),ENSMUSG00000017830(Dhx58),ENSMUSG00000019979(Apaf1),ENSMUSG00000020464(Pnpt1),ENSMUSG00000020641(Rsad2),ENSMUSG00000020…	ENSMUSG00000016984(Etaa1),ENSMUSG00000025764(Jade1),ENSMUSG00000026873(Phf19),ENSMUSG00000026883(Dab2ip),ENSMUSG00000034957(Cebpa),ENSMUSG00000036867(Smad6),ENSMUSG00000038065(Mturn),ENSMUSG00000038797(Zscan2),ENSMUSG00000042745(Id1),ENSMUSG00000056501(Cebpb),ENSMUSG00000071064(Zfp827),ENSMUSG00000078870(Gm14410)
BP	GO:0051246	regulation of protein metabolic process	65	9	74	2806	0.000663415	0.0120689	ENSMUSG00000000184(Ccnd2),ENSMUSG00000002227(Mov10),ENSMUSG00000002307(Daxx),ENSMUSG00000004040(Stat3),ENSMUSG00000009185(Ccl8),ENSMUSG00000012519(Mlkl),ENSMUSG00000015316(Slamf1),ENSMUSG00000015947(Fcgr1),ENSMUSG00000019979(Apaf1),ENSMUSG00000020415(Pttg1),ENSMUSG00000020717(Pecam1),ENSMUSG00000021127(Zfp36l1),ENSMUSG00000021367(Edn1),ENSMUSG00000022876(Samsn1),ENSMUSG00000022901(Cd86),ENSMUSG00…	ENSMUSG00000000983(Wfdc18),ENSMUSG00000016984(Etaa1),ENSMUSG00000026873(Phf19),ENSMUSG00000026883(Dab2ip),ENSMUSG00000026975(Dph7),ENSMUSG00000036867(Smad6),ENSMUSG00000038065(Mturn),ENSMUSG00000042745(Id1),ENSMUSG00000072082(Ccnf)
BP	GO:1901222	regulation of NIK/NF-kappaB signaling	8	0	8	105	0.000692788	0.0124897	ENSMUSG00000010358(Ifi35),ENSMUSG00000021367(Edn1),ENSMUSG00000022901(Cd86),ENSMUSG00000024079(Eif2ak2),ENSMUSG00000031639(Tlr3),ENSMUSG00000038058(Nod1),ENSMUSG00000044583(Tlr7),ENSMUSG00000045322(Tlr9)	-
BP	GO:0010562	positive regulation of phosphorus metabolic process	33	4	37	1156	0.000692827	0.0124897	ENSMUSG00000000184(Ccnd2),ENSMUSG00000002307(Daxx),ENSMUSG00000004040(Stat3),ENSMUSG00000009185(Ccl8),ENSMUSG00000012519(Mlkl),ENSMUSG00000014361(Mertk),ENSMUSG00000015316(Slamf1),ENSMUSG00000015947(Fcgr1),ENSMUSG00000020717(Pecam1),ENSMUSG00000021367(Edn1),ENSMUSG00000022901(Cd86),ENSMUSG00000024079(Eif2ak2),ENSMUSG00000024397(Aif1),ENSMUSG00000024610(Cd74),ENSMUSG00000026121(Sema4c),ENSMUSG0000…	ENSMUSG00000016984(Etaa1),ENSMUSG00000026409(Pfkfb2),ENSMUSG00000026883(Dab2ip),ENSMUSG00000038065(Mturn)
BP	GO:0045937	positive regulation of phosphate metabolic process	33	4	37	1156	0.000692827	0.0124897	ENSMUSG00000000184(Ccnd2),ENSMUSG00000002307(Daxx),ENSMUSG00000004040(Stat3),ENSMUSG00000009185(Ccl8),ENSMUSG00000012519(Mlkl),ENSMUSG00000014361(Mertk),ENSMUSG00000015316(Slamf1),ENSMUSG00000015947(Fcgr1),ENSMUSG00000020717(Pecam1),ENSMUSG00000021367(Edn1),ENSMUSG00000022901(Cd86),ENSMUSG00000024079(Eif2ak2),ENSMUSG00000024397(Aif1),ENSMUSG00000024610(Cd74),ENSMUSG00000026121(Sema4c),ENSMUSG0000…	ENSMUSG00000016984(Etaa1),ENSMUSG00000026409(Pfkfb2),ENSMUSG00000026883(Dab2ip),ENSMUSG00000038065(Mturn)
BP	GO:0070098	chemokine-mediated signaling pathway	7	0	7	81	0.00070445	0.012661	ENSMUSG00000009185(Ccl8),ENSMUSG00000021367(Edn1),ENSMUSG00000029417(Cxcl9),ENSMUSG00000034855(Cxcl10),ENSMUSG00000035352(Ccl12),ENSMUSG00000037944(Ccr7),ENSMUSG00000079227(Ccr5)	-
BP	GO:0051701	interaction with host	10	0	10	159	0.000710303	0.0127279	ENSMUSG00000006411(Nectin4),ENSMUSG00000024610(Cd74),ENSMUSG00000025492(Ifitm3),ENSMUSG00000030921(Trim30a),ENSMUSG00000036986(Pml),ENSMUSG00000046879(Irgm1),ENSMUSG00000057596(Trim30d),ENSMUSG00000069874(Irgm2),ENSMUSG00000078616(Trim30c),ENSMUSG00000079227(Ccr5)	-
BP	GO:0051091	positive regulation of DNA-binding transcription factor activity	13	0	13	249	0.000712443	0.012728	ENSMUSG00000001552(Jup),ENSMUSG00000004040(Stat3),ENSMUSG00000021367(Edn1),ENSMUSG00000024079(Eif2ak2),ENSMUSG00000030921(Trim30a),ENSMUSG00000031639(Tlr3),ENSMUSG00000033871(Ppargc1b),ENSMUSG00000037860(Aim2),ENSMUSG00000038058(Nod1),ENSMUSG00000040296(Ddx58),ENSMUSG00000045322(Tlr9),ENSMUSG00000057596(Trim30d),ENSMUSG00000078616(Trim30c)	-
BP	GO:1902807	negative regulation of cell cycle G1/S phase transition	4	2	6	59	0.000715428	0.0127432	ENSMUSG00000027641(Rbl1),ENSMUSG00000035352(Ccl12),ENSMUSG00000036986(Pml),ENSMUSG00000078763(Slfn1)	ENSMUSG00000025764(Jade1),ENSMUSG00000052934(Fbxo31)
BP	GO:0050727	regulation of inflammatory response	13	3	16	348	0.000728244	0.0129328	ENSMUSG00000004040(Stat3),ENSMUSG00000010358(Ifi35),ENSMUSG00000015947(Fcgr1),ENSMUSG00000026770(Il2ra),ENSMUSG00000027514(Zbp1),ENSMUSG00000030107(Usp18),ENSMUSG00000030560(Ctsc),ENSMUSG00000031639(Tlr3),ENSMUSG00000037944(Ccr7),ENSMUSG00000044786(Zfp36),ENSMUSG00000045322(Tlr9),ENSMUSG00000068129(Cst7),ENSMUSG00000079227(Ccr5)	ENSMUSG00000031671(Setd6),ENSMUSG00000034957(Cebpa),ENSMUSG00000056501(Cebpb)
BP	GO:0006796	phosphate-containing compound metabolic process	68	12	80	3099	0.000731717	0.0129559	ENSMUSG00000000184(Ccnd2),ENSMUSG00000002307(Daxx),ENSMUSG00000004040(Stat3),ENSMUSG00000009185(Ccl8),ENSMUSG00000012519(Mlkl),ENSMUSG00000014361(Mertk),ENSMUSG00000015316(Slamf1),ENSMUSG00000015947(Fcgr1),ENSMUSG00000019990(Pde7b),ENSMUSG00000020638(Cmpk2),ENSMUSG00000020717(Pecam1),ENSMUSG00000021127(Zfp36l1),ENSMUSG00000021367(Edn1),ENSMUSG00000022876(Samsn1),ENSMUSG00000022901(Cd86),ENSMUSG00…	ENSMUSG00000016984(Etaa1),ENSMUSG00000026409(Pfkfb2),ENSMUSG00000026575(Nme7),ENSMUSG00000026785(Pkn3),ENSMUSG00000026883(Dab2ip),ENSMUSG00000027379(Bub1),ENSMUSG00000027999(Pla2g12a),ENSMUSG00000032456(Nmnat3),ENSMUSG00000036867(Smad6),ENSMUSG00000038065(Mturn),ENSMUSG00000042745(Id1),ENSMUSG00000072082(Ccnf)
BP	GO:2000045	regulation of G1/S transition of mitotic cell cycle	6	2	8	106	0.000737633	0.0130145	ENSMUSG00000000184(Ccnd2),ENSMUSG00000024397(Aif1),ENSMUSG00000027641(Rbl1),ENSMUSG00000035352(Ccl12),ENSMUSG00000036986(Pml),ENSMUSG00000078763(Slfn1)	ENSMUSG00000025764(Jade1),ENSMUSG00000052934(Fbxo31)
BP	GO:0001818	negative regulation of cytokine production	12	1	13	250	0.000739388	0.0130145	ENSMUSG00000004698(Hdac9),ENSMUSG00000014361(Mertk),ENSMUSG00000014773(Dll1),ENSMUSG00000015316(Slamf1),ENSMUSG00000017830(Dhx58),ENSMUSG00000030921(Trim30a),ENSMUSG00000036986(Pml),ENSMUSG00000037944(Ccr7),ENSMUSG00000044786(Zfp36),ENSMUSG00000045322(Tlr9),ENSMUSG00000048806(Ifnb1),ENSMUSG00000079363(Gbp4)	ENSMUSG00000023915(Tnfrsf21)
BP	GO:0050920	regulation of chemotaxis	10	2	12	220	0.000773171	0.0135692	ENSMUSG00000015316(Slamf1),ENSMUSG00000021367(Edn1),ENSMUSG00000024397(Aif1),ENSMUSG00000024610(Cd74),ENSMUSG00000026121(Sema4c),ENSMUSG00000026581(Sell),ENSMUSG00000034855(Cxcl10),ENSMUSG00000035352(Ccl12),ENSMUSG00000037944(Ccr7),ENSMUSG00000062960(Kdr)	ENSMUSG00000001227(Sema6b),ENSMUSG00000028539(Artn)
BP	GO:0098586	cellular response to virus	6	0	6	60	0.000782857	0.0136988	ENSMUSG00000017830(Dhx58),ENSMUSG00000026896(Ifih1),ENSMUSG00000037921(Ddx60),ENSMUSG00000040296(Ddx58),ENSMUSG00000048806(Ifnb1),ENSMUSG00000069874(Irgm2)	-
BP	GO:0043549	regulation of kinase activity	25	4	29	837	0.000795682	0.0138451	ENSMUSG00000000184(Ccnd2),ENSMUSG00000002307(Daxx),ENSMUSG00000012519(Mlkl),ENSMUSG00000014361(Mertk),ENSMUSG00000015947(Fcgr1),ENSMUSG00000021367(Edn1),ENSMUSG00000022901(Cd86),ENSMUSG00000024079(Eif2ak2),ENSMUSG00000024610(Cd74),ENSMUSG00000026360(Rgs2),ENSMUSG00000026981(Il1rn),ENSMUSG00000027641(Rbl1),ENSMUSG00000029204(Rhoh),ENSMUSG00000031628(Casp3),ENSMUSG00000034765(Dusp5),ENSMUSG00000034…	ENSMUSG00000016984(Etaa1),ENSMUSG00000026409(Pfkfb2),ENSMUSG00000026883(Dab2ip),ENSMUSG00000072082(Ccnf)
BP	GO:0022409	positive regulation of cell-cell adhesion	13	0	13	252	0.000795856	0.0138451	ENSMUSG00000015316(Slamf1),ENSMUSG00000022901(Cd86),ENSMUSG00000024397(Aif1),ENSMUSG00000024610(Cd74),ENSMUSG00000026770(Il2ra),ENSMUSG00000029204(Rhoh),ENSMUSG00000031712(Il15),ENSMUSG00000036594(H2-Aa),ENSMUSG00000037944(Ccr7),ENSMUSG00000073421(H2-Ab1),ENSMUSG00000079227(Ccr5),ENSMUSG00000095028(Sirpb1b),ENSMUSG00000095788(Sirpb1a)	-
MF	GO:0005515	protein binding	160	31	191	8968	0.000815129	0.0141392	ENSMUSG00000000184(Ccnd2),ENSMUSG00000000247(Lhx2),ENSMUSG00000001156(Mxd1),ENSMUSG00000001552(Jup),ENSMUSG00000002104(Rapsn),ENSMUSG00000002227(Mov10),ENSMUSG00000002307(Daxx),ENSMUSG00000003617(Cp),ENSMUSG00000004040(Stat3),ENSMUSG00000004698(Hdac9),ENSMUSG00000005237(Dnah2),ENSMUSG00000006411(Nectin4),ENSMUSG00000009185(Ccl8),ENSMUSG00000010358(Ifi35),ENSMUSG00000012519(Mlkl),ENSMUSG0000001477…	ENSMUSG00000001227(Sema6b),ENSMUSG00000002769(Gnmt),ENSMUSG00000004105(Angptl2),ENSMUSG00000006442(Srm),ENSMUSG00000022494(Shisa9),ENSMUSG00000022621(Rabl2),ENSMUSG00000024056(Ndc80),ENSMUSG00000024186(Rgs11),ENSMUSG00000025732(Mcrip2),ENSMUSG00000026409(Pfkfb2),ENSMUSG00000026873(Phf19),ENSMUSG00000026883(Dab2ip),ENSMUSG00000028539(Artn),ENSMUSG00000028933(Xrcc2),ENSMUSG00000030852(Tacc2),ENSMUS…
MF	GO:0042802	identical protein binding	47	11	58	2132	0.000835918	0.0144577	ENSMUSG00000004040(Stat3),ENSMUSG00000006411(Nectin4),ENSMUSG00000010358(Ifi35),ENSMUSG00000012519(Mlkl),ENSMUSG00000015316(Slamf1),ENSMUSG00000019979(Apaf1),ENSMUSG00000020717(Pecam1),ENSMUSG00000024079(Eif2ak2),ENSMUSG00000026536(Ifi211),ENSMUSG00000026896(Ifih1),ENSMUSG00000027360(Hdc),ENSMUSG00000027514(Zbp1),ENSMUSG00000027639(Samhd1),ENSMUSG00000028268(Gbp3),ENSMUSG00000028270(Gbp2),ENSMUSG…	ENSMUSG00000002769(Gnmt),ENSMUSG00000006442(Srm),ENSMUSG00000024056(Ndc80),ENSMUSG00000026883(Dab2ip),ENSMUSG00000034957(Cebpa),ENSMUSG00000036867(Smad6),ENSMUSG00000037098(Rab11fip3),ENSMUSG00000042745(Id1),ENSMUSG00000043866(Taf10),ENSMUSG00000050910(Cdr2l),ENSMUSG00000056501(Cebpb)
BP	GO:0007254	JNK cascade	9	2	11	192	0.000849842	0.0146561	ENSMUSG00000012519(Mlkl),ENSMUSG00000015316(Slamf1),ENSMUSG00000021367(Edn1),ENSMUSG00000026981(Il1rn),ENSMUSG00000031639(Tlr3),ENSMUSG00000037944(Ccr7),ENSMUSG00000038058(Nod1),ENSMUSG00000042901(Aida),ENSMUSG00000045322(Tlr9)	ENSMUSG00000026883(Dab2ip),ENSMUSG00000038065(Mturn)
BP	GO:0050691	regulation of defense response to virus by host	5	0	5	41	0.000868791	0.0149397	ENSMUSG00000031712(Il15),ENSMUSG00000036986(Pml),ENSMUSG00000037860(Aim2),ENSMUSG00000040296(Ddx58),ENSMUSG00000044701(Il27)	-
BP	GO:0019886	antigen processing and presentation of exogenous peptide antigen via MHC class II	3	0	3	11	0.000897637	0.0153914	ENSMUSG00000024610(Cd74),ENSMUSG00000036594(H2-Aa),ENSMUSG00000073421(H2-Ab1)	-
BP	GO:0006793	phosphorus metabolic process	68	12	80	3121	0.000903126	0.0154411	ENSMUSG00000000184(Ccnd2),ENSMUSG00000002307(Daxx),ENSMUSG00000004040(Stat3),ENSMUSG00000009185(Ccl8),ENSMUSG00000012519(Mlkl),ENSMUSG00000014361(Mertk),ENSMUSG00000015316(Slamf1),ENSMUSG00000015947(Fcgr1),ENSMUSG00000019990(Pde7b),ENSMUSG00000020638(Cmpk2),ENSMUSG00000020717(Pecam1),ENSMUSG00000021127(Zfp36l1),ENSMUSG00000021367(Edn1),ENSMUSG00000022876(Samsn1),ENSMUSG00000022901(Cd86),ENSMUSG00…	ENSMUSG00000016984(Etaa1),ENSMUSG00000026409(Pfkfb2),ENSMUSG00000026575(Nme7),ENSMUSG00000026785(Pkn3),ENSMUSG00000026883(Dab2ip),ENSMUSG00000027379(Bub1),ENSMUSG00000027999(Pla2g12a),ENSMUSG00000032456(Nmnat3),ENSMUSG00000036867(Smad6),ENSMUSG00000038065(Mturn),ENSMUSG00000042745(Id1),ENSMUSG00000072082(Ccnf)
BP	GO:0035239	tube morphogenesis	26	4	30	886	0.000934186	0.0159265	ENSMUSG00000000247(Lhx2),ENSMUSG00000001552(Jup),ENSMUSG00000001768(Rin2),ENSMUSG00000004040(Stat3),ENSMUSG00000004698(Hdac9),ENSMUSG00000014773(Dll1),ENSMUSG00000019979(Apaf1),ENSMUSG00000020717(Pecam1),ENSMUSG00000021127(Zfp36l1),ENSMUSG00000021367(Edn1),ENSMUSG00000024238(Zeb1),ENSMUSG00000026121(Sema4c),ENSMUSG00000026222(Sp100),ENSMUSG00000030671(Pde3b),ENSMUSG00000031628(Casp3),ENSMUSG00000…	ENSMUSG00000004105(Angptl2),ENSMUSG00000026883(Dab2ip),ENSMUSG00000036867(Smad6),ENSMUSG00000042745(Id1)
BP	GO:0001934	positive regulation of protein phosphorylation	30	3	33	1011	0.000974064	0.0165591	ENSMUSG00000000184(Ccnd2),ENSMUSG00000002307(Daxx),ENSMUSG00000009185(Ccl8),ENSMUSG00000012519(Mlkl),ENSMUSG00000015316(Slamf1),ENSMUSG00000015947(Fcgr1),ENSMUSG00000020717(Pecam1),ENSMUSG00000021367(Edn1),ENSMUSG00000022901(Cd86),ENSMUSG00000024079(Eif2ak2),ENSMUSG00000024397(Aif1),ENSMUSG00000024610(Cd74),ENSMUSG00000026121(Sema4c),ENSMUSG00000026981(Il1rn),ENSMUSG00000027293(Ehd4),ENSMUSG00000…	ENSMUSG00000016984(Etaa1),ENSMUSG00000026883(Dab2ip),ENSMUSG00000038065(Mturn)
BP	GO:0007284	spermatogonial cell division	1	1	2	3	0.000988565	0.0166163	ENSMUSG00000034329(Brip1)	ENSMUSG00000034758(Tle6)
BP	GO:1900245	positive regulation of MDA-5 signaling pathway	2	0	2	3	0.000988565	0.0166163	ENSMUSG00000017830(Dhx58),ENSMUSG00000037921(Ddx60)	-
BP	GO:1904580	regulation of intracellular mRNA localization	2	0	2	3	0.000988565	0.0166163	ENSMUSG00000021127(Zfp36l1),ENSMUSG00000044786(Zfp36)	-
BP	GO:1904582	positive regulation of intracellular mRNA localization	2	0	2	3	0.000988565	0.0166163	ENSMUSG00000021127(Zfp36l1),ENSMUSG00000044786(Zfp36)	-
BP	GO:0032722	positive regulation of chemokine production	6	0	6	63	0.00101487	0.0170105	ENSMUSG00000024079(Eif2ak2),ENSMUSG00000024397(Aif1),ENSMUSG00000024610(Cd74),ENSMUSG00000031639(Tlr3),ENSMUSG00000044583(Tlr7),ENSMUSG00000045322(Tlr9)	-
CC	GO:0030139	endocytic vesicle	9	2	11	193	0.00105082	0.0175637	ENSMUSG00000015316(Slamf1),ENSMUSG00000027293(Ehd4),ENSMUSG00000037321(Tap1),ENSMUSG00000038058(Nod1),ENSMUSG00000044583(Tlr7),ENSMUSG00000045322(Tlr9),ENSMUSG00000046879(Irgm1),ENSMUSG00000057135(Scimp),ENSMUSG00000062232(Rapgef2)	ENSMUSG00000026883(Dab2ip),ENSMUSG00000037098(Rab11fip3)
BP	GO:0009893	positive regulation of metabolic process	81	13	94	3814	0.00105788	0.0176309	ENSMUSG00000000184(Ccnd2),ENSMUSG00000000247(Lhx2),ENSMUSG00000001552(Jup),ENSMUSG00000002227(Mov10),ENSMUSG00000002307(Daxx),ENSMUSG00000004040(Stat3),ENSMUSG00000009185(Ccl8),ENSMUSG00000012519(Mlkl),ENSMUSG00000014361(Mertk),ENSMUSG00000014773(Dll1),ENSMUSG00000015316(Slamf1),ENSMUSG00000015947(Fcgr1),ENSMUSG00000017830(Dhx58),ENSMUSG00000019979(Apaf1),ENSMUSG00000020464(Pnpt1),ENSMUSG00000020…	ENSMUSG00000016984(Etaa1),ENSMUSG00000025764(Jade1),ENSMUSG00000026409(Pfkfb2),ENSMUSG00000026873(Phf19),ENSMUSG00000026883(Dab2ip),ENSMUSG00000034957(Cebpa),ENSMUSG00000036867(Smad6),ENSMUSG00000038065(Mturn),ENSMUSG00000038797(Zscan2),ENSMUSG00000042745(Id1),ENSMUSG00000056501(Cebpb),ENSMUSG00000071064(Zfp827),ENSMUSG00000078870(Gm14410)
BP	GO:0051336	regulation of hydrolase activity	35	3	38	1226	0.00106075	0.0176309	ENSMUSG00000001768(Rin2),ENSMUSG00000004040(Stat3),ENSMUSG00000004698(Hdac9),ENSMUSG00000009185(Ccl8),ENSMUSG00000015222(Map2),ENSMUSG00000019979(Apaf1),ENSMUSG00000020415(Pttg1),ENSMUSG00000020709(Adap2),ENSMUSG00000020717(Pecam1),ENSMUSG00000021886(Gpr65),ENSMUSG00000022901(Cd86),ENSMUSG00000023903(Mmp25),ENSMUSG00000026358(Rgs1),ENSMUSG00000026360(Rgs2),ENSMUSG00000026535(Ifi202b),ENSMUSG00000…	ENSMUSG00000000983(Wfdc18),ENSMUSG00000026883(Dab2ip),ENSMUSG00000039831(Arhgap29)
BP	GO:0043506	regulation of JUN kinase activity	6	1	7	88	0.00115356	0.0191203	ENSMUSG00000012519(Mlkl),ENSMUSG00000021367(Edn1),ENSMUSG00000026981(Il1rn),ENSMUSG00000037944(Ccr7),ENSMUSG00000042901(Aida),ENSMUSG00000045322(Tlr9)	ENSMUSG00000026883(Dab2ip)
BP	GO:0048514	blood vessel morphogenesis	19	4	23	621	0.00116001	0.0191738	ENSMUSG00000001552(Jup),ENSMUSG00000001768(Rin2),ENSMUSG00000004040(Stat3),ENSMUSG00000004698(Hdac9),ENSMUSG00000014773(Dll1),ENSMUSG00000020717(Pecam1),ENSMUSG00000021127(Zfp36l1),ENSMUSG00000021367(Edn1),ENSMUSG00000026222(Sp100),ENSMUSG00000030671(Pde3b),ENSMUSG00000031639(Tlr3),ENSMUSG00000033470(Cysltr2),ENSMUSG00000034640(Tiparp),ENSMUSG00000034855(Cxcl10),ENSMUSG00000035352(Ccl12),ENSMUSG0…	ENSMUSG00000004105(Angptl2),ENSMUSG00000026883(Dab2ip),ENSMUSG00000036867(Smad6),ENSMUSG00000042745(Id1)
BP	GO:0051092	positive regulation of NF-kappaB transcription factor activity	9	0	9	141	0.00117009	0.019287	ENSMUSG00000004040(Stat3),ENSMUSG00000024079(Eif2ak2),ENSMUSG00000030921(Trim30a),ENSMUSG00000031639(Tlr3),ENSMUSG00000037860(Aim2),ENSMUSG00000038058(Nod1),ENSMUSG00000045322(Tlr9),ENSMUSG00000057596(Trim30d),ENSMUSG00000078616(Trim30c)	-
MF	GO:0003727	single-stranded RNA binding	7	0	7	90	0.00117624	0.019335	ENSMUSG00000017830(Dhx58),ENSMUSG00000020464(Pnpt1),ENSMUSG00000026896(Ifih1),ENSMUSG00000037921(Ddx60),ENSMUSG00000039989(Cbx4),ENSMUSG00000040296(Ddx58),ENSMUSG00000044583(Tlr7)	-
BP	GO:0038061	NIK/NF-kappaB signaling	8	0	8	114	0.00118688	0.0194563	ENSMUSG00000010358(Ifi35),ENSMUSG00000021367(Edn1),ENSMUSG00000022901(Cd86),ENSMUSG00000024079(Eif2ak2),ENSMUSG00000031639(Tlr3),ENSMUSG00000038058(Nod1),ENSMUSG00000044583(Tlr7),ENSMUSG00000045322(Tlr9)	-
BP	GO:0071900	regulation of protein serine/threonine kinase activity	16	3	19	472	0.00119085	0.019468	ENSMUSG00000000184(Ccnd2),ENSMUSG00000012519(Mlkl),ENSMUSG00000021367(Edn1),ENSMUSG00000024079(Eif2ak2),ENSMUSG00000024610(Cd74),ENSMUSG00000026360(Rgs2),ENSMUSG00000026981(Il1rn),ENSMUSG00000031628(Casp3),ENSMUSG00000034765(Dusp5),ENSMUSG00000034997(Htr2a),ENSMUSG00000037944(Ccr7),ENSMUSG00000042901(Aida),ENSMUSG00000045322(Tlr9),ENSMUSG00000052087(Rgs14),ENSMUSG00000062232(Rapgef2),ENSMUSG00000…	ENSMUSG00000016984(Etaa1),ENSMUSG00000026883(Dab2ip),ENSMUSG00000072082(Ccnf)
BP	GO:1902622	regulation of neutrophil migration	5	0	5	44	0.00120393	0.019628	ENSMUSG00000021367(Edn1),ENSMUSG00000024610(Cd74),ENSMUSG00000026581(Sell),ENSMUSG00000029204(Rhoh),ENSMUSG00000037944(Ccr7)	-
BP	GO:0030099	myeloid cell differentiation	14	3	17	401	0.00122757	0.0199374	ENSMUSG00000004040(Stat3),ENSMUSG00000014773(Dll1),ENSMUSG00000021127(Zfp36l1),ENSMUSG00000024610(Cd74),ENSMUSG00000031628(Casp3),ENSMUSG00000031712(Il15),ENSMUSG00000033871(Ppargc1b),ENSMUSG00000035692(Isg15),ENSMUSG00000036986(Pml),ENSMUSG00000037944(Ccr7),ENSMUSG00000039699(Batf2),ENSMUSG00000041515(Irf8),ENSMUSG00000044786(Zfp36),ENSMUSG00000048806(Ifnb1)	ENSMUSG00000034957(Cebpa),ENSMUSG00000038065(Mturn),ENSMUSG00000056501(Cebpb)
BP	GO:1901991	negative regulation of mitotic cell cycle phase transition	5	4	9	142	0.00122959	0.0199374	ENSMUSG00000021127(Zfp36l1),ENSMUSG00000027641(Rbl1),ENSMUSG00000035352(Ccl12),ENSMUSG00000036986(Pml),ENSMUSG00000078763(Slfn1)	ENSMUSG00000024056(Ndc80),ENSMUSG00000025764(Jade1),ENSMUSG00000027379(Bub1),ENSMUSG00000052934(Fbxo31)
BP	GO:0051338	regulation of transferase activity	27	4	31	943	0.00123609	0.0199884	ENSMUSG00000000184(Ccnd2),ENSMUSG00000002307(Daxx),ENSMUSG00000012519(Mlkl),ENSMUSG00000014361(Mertk),ENSMUSG00000015947(Fcgr1),ENSMUSG00000021367(Edn1),ENSMUSG00000022901(Cd86),ENSMUSG00000024079(Eif2ak2),ENSMUSG00000024610(Cd74),ENSMUSG00000026360(Rgs2),ENSMUSG00000026981(Il1rn),ENSMUSG00000027641(Rbl1),ENSMUSG00000029204(Rhoh),ENSMUSG00000031628(Casp3),ENSMUSG00000034765(Dusp5),ENSMUSG00000034…	ENSMUSG00000016984(Etaa1),ENSMUSG00000026409(Pfkfb2),ENSMUSG00000026883(Dab2ip),ENSMUSG00000072082(Ccnf)
BP	GO:0030217	T cell differentiation	13	0	13	265	0.0012584	0.0202943	ENSMUSG00000004040(Stat3),ENSMUSG00000020641(Rsad2),ENSMUSG00000021127(Zfp36l1),ENSMUSG00000024238(Zeb1),ENSMUSG00000024610(Cd74),ENSMUSG00000026770(Il2ra),ENSMUSG00000029204(Rhoh),ENSMUSG00000031712(Il15),ENSMUSG00000036594(H2-Aa),ENSMUSG00000037944(Ccr7),ENSMUSG00000039899(Fgl2),ENSMUSG00000044701(Il27),ENSMUSG00000048806(Ifnb1)	-
CC	GO:0042175	nuclear outer membrane-endoplasmic reticulum membrane network	33	0	33	1006	0.00127597	0.0205222	ENSMUSG00000020464(Pnpt1),ENSMUSG00000020641(Rsad2),ENSMUSG00000021263(Degs2),ENSMUSG00000021364(Elovl2),ENSMUSG00000022684(Bfar),ENSMUSG00000023307(Marchf5),ENSMUSG00000024610(Cd74),ENSMUSG00000025324(Atp10a),ENSMUSG00000030409(Dmpk),ENSMUSG00000031639(Tlr3),ENSMUSG00000033847(Pla2g4c),ENSMUSG00000035929(H2-Q4),ENSMUSG00000036986(Pml),ENSMUSG00000037321(Tap1),ENSMUSG00000044583(Tlr7),ENSMUSG0000…	-
BP	GO:0002753	cytoplasmic pattern recognition receptor signaling pathway	5	0	5	45	0.00133438	0.0213563	ENSMUSG00000017830(Dhx58),ENSMUSG00000026896(Ifih1),ENSMUSG00000037921(Ddx60),ENSMUSG00000040296(Ddx58),ENSMUSG00000069874(Irgm2)	-
MF	GO:0005125	cytokine activity	12	0	12	239	0.00133499	0.0213563	ENSMUSG00000009185(Ccl8),ENSMUSG00000016524(Il19),ENSMUSG00000021367(Edn1),ENSMUSG00000022938(Fam3b),ENSMUSG00000026981(Il1rn),ENSMUSG00000029417(Cxcl9),ENSMUSG00000031712(Il15),ENSMUSG00000034855(Cxcl10),ENSMUSG00000035352(Ccl12),ENSMUSG00000039304(Tnfsf10),ENSMUSG00000044701(Il27),ENSMUSG00000048806(Ifnb1)	-
MF	GO:0005102	signaling receptor binding	38	8	46	1623	0.00134363	0.0214369	ENSMUSG00000001552(Jup),ENSMUSG00000002104(Rapsn),ENSMUSG00000002307(Daxx),ENSMUSG00000004040(Stat3),ENSMUSG00000009185(Ccl8),ENSMUSG00000014773(Dll1),ENSMUSG00000015947(Fcgr1),ENSMUSG00000016524(Il19),ENSMUSG00000021367(Edn1),ENSMUSG00000022901(Cd86),ENSMUSG00000022938(Fam3b),ENSMUSG00000024610(Cd74),ENSMUSG00000026121(Sema4c),ENSMUSG00000026764(Kif5c),ENSMUSG00000026981(Il1rn),ENSMUSG0000002941…	ENSMUSG00000001227(Sema6b),ENSMUSG00000004105(Angptl2),ENSMUSG00000026883(Dab2ip),ENSMUSG00000028539(Artn),ENSMUSG00000030852(Tacc2),ENSMUSG00000036867(Smad6),ENSMUSG00000043866(Taf10),ENSMUSG00000056501(Cebpb)
BP	GO:0060338	regulation of type I interferon-mediated signaling pathway	4	0	4	27	0.00138477	0.0219758	ENSMUSG00000025498(Irf7),ENSMUSG00000027514(Zbp1),ENSMUSG00000027639(Samhd1),ENSMUSG00000074151(Nlrc5)	-
BP	GO:0090023	positive regulation of neutrophil chemotaxis	4	0	4	27	0.00138477	0.0219758	ENSMUSG00000021367(Edn1),ENSMUSG00000024610(Cd74),ENSMUSG00000026581(Sell),ENSMUSG00000037944(Ccr7)	-
BP	GO:0014070	response to organic cyclic compound	28	5	33	1034	0.00141074	0.0223287	ENSMUSG00000001552(Jup),ENSMUSG00000002307(Daxx),ENSMUSG00000004040(Stat3),ENSMUSG00000020464(Pnpt1),ENSMUSG00000021127(Zfp36l1),ENSMUSG00000021367(Edn1),ENSMUSG00000024079(Eif2ak2),ENSMUSG00000024397(Aif1),ENSMUSG00000026581(Sell),ENSMUSG00000026896(Ifih1),ENSMUSG00000026981(Il1rn),ENSMUSG00000030107(Usp18),ENSMUSG00000031628(Casp3),ENSMUSG00000031639(Tlr3),ENSMUSG00000031712(Il15),ENSMUSG000000…	ENSMUSG00000025931(Paqr8),ENSMUSG00000030322(Mbd4),ENSMUSG00000033863(Klf9),ENSMUSG00000034957(Cebpa),ENSMUSG00000056501(Cebpb)
BP	GO:0009966	regulation of signal transduction	65	8	73	2836	0.00141824	0.0223879	ENSMUSG00000004040(Stat3),ENSMUSG00000009185(Ccl8),ENSMUSG00000010358(Ifi35),ENSMUSG00000012519(Mlkl),ENSMUSG00000014773(Dll1),ENSMUSG00000015316(Slamf1),ENSMUSG00000016524(Il19),ENSMUSG00000017830(Dhx58),ENSMUSG00000019979(Apaf1),ENSMUSG00000020641(Rsad2),ENSMUSG00000020717(Pecam1),ENSMUSG00000021367(Edn1),ENSMUSG00000021423(Ly86),ENSMUSG00000022684(Bfar),ENSMUSG00000022901(Cd86),ENSMUSG00000024…	ENSMUSG00000022494(Shisa9),ENSMUSG00000024186(Rgs11),ENSMUSG00000025764(Jade1),ENSMUSG00000026883(Dab2ip),ENSMUSG00000034758(Tle6),ENSMUSG00000036867(Smad6),ENSMUSG00000038065(Mturn),ENSMUSG00000042745(Id1)
CC	GO:0005737	cytoplasm	192	43	235	11011	0.00143237	0.0225514	ENSMUSG00000000184(Ccnd2),ENSMUSG00000001128(Cfp),ENSMUSG00000001156(Mxd1),ENSMUSG00000001552(Jup),ENSMUSG00000001768(Rin2),ENSMUSG00000002104(Rapsn),ENSMUSG00000002227(Mov10),ENSMUSG00000002307(Daxx),ENSMUSG00000004040(Stat3),ENSMUSG00000004698(Hdac9),ENSMUSG00000005237(Dnah2),ENSMUSG00000010358(Ifi35),ENSMUSG00000012519(Mlkl),ENSMUSG00000014361(Mertk),ENSMUSG00000014773(Dll1),ENSMUSG00000015222…	ENSMUSG00000002769(Gnmt),ENSMUSG00000009566(Fpgs),ENSMUSG00000016984(Etaa1),ENSMUSG00000019158(Tmem160),ENSMUSG00000022474(Pmm1),ENSMUSG00000023915(Tnfrsf21),ENSMUSG00000024056(Ndc80),ENSMUSG00000025732(Mcrip2),ENSMUSG00000025764(Jade1),ENSMUSG00000025931(Paqr8),ENSMUSG00000026409(Pfkfb2),ENSMUSG00000026785(Pkn3),ENSMUSG00000026883(Dab2ip),ENSMUSG00000027379(Bub1),ENSMUSG00000027999(Pla2g12a),ENS…
BP	GO:0046596	regulation of viral entry into host cell	5	0	5	46	0.00147497	0.023161	ENSMUSG00000024610(Cd74),ENSMUSG00000025492(Ifitm3),ENSMUSG00000030921(Trim30a),ENSMUSG00000057596(Trim30d),ENSMUSG00000078616(Trim30c)	-
BP	GO:0050794	regulation of cellular process	196	49	245	11837	0.00148281	0.023223	ENSMUSG00000000184(Ccnd2),ENSMUSG00000000247(Lhx2),ENSMUSG00000001156(Mxd1),ENSMUSG00000001552(Jup),ENSMUSG00000001768(Rin2),ENSMUSG00000002104(Rapsn),ENSMUSG00000002227(Mov10),ENSMUSG00000002307(Daxx),ENSMUSG00000004040(Stat3),ENSMUSG00000004698(Hdac9),ENSMUSG00000006310(Zbtb32),ENSMUSG00000009185(Ccl8),ENSMUSG00000010358(Ifi35),ENSMUSG00000012519(Mlkl),ENSMUSG00000014361(Mertk),ENSMUSG000000147…	ENSMUSG00000000983(Wfdc18),ENSMUSG00000001227(Sema6b),ENSMUSG00000002769(Gnmt),ENSMUSG00000016984(Etaa1),ENSMUSG00000022494(Shisa9),ENSMUSG00000023915(Tnfrsf21),ENSMUSG00000024056(Ndc80),ENSMUSG00000024186(Rgs11),ENSMUSG00000025764(Jade1),ENSMUSG00000025931(Paqr8),ENSMUSG00000026409(Pfkfb2),ENSMUSG00000026785(Pkn3),ENSMUSG00000026873(Phf19),ENSMUSG00000026883(Dab2ip),ENSMUSG00000026975(Dph7),ENSM…
BP	GO:1990868	response to chemokine	7	0	7	92	0.0014961	0.0233087	ENSMUSG00000009185(Ccl8),ENSMUSG00000021367(Edn1),ENSMUSG00000029417(Cxcl9),ENSMUSG00000034855(Cxcl10),ENSMUSG00000035352(Ccl12),ENSMUSG00000037944(Ccr7),ENSMUSG00000079227(Ccr5)	-
BP	GO:1990869	cellular response to chemokine	7	0	7	92	0.0014961	0.0233087	ENSMUSG00000009185(Ccl8),ENSMUSG00000021367(Edn1),ENSMUSG00000029417(Cxcl9),ENSMUSG00000034855(Cxcl10),ENSMUSG00000035352(Ccl12),ENSMUSG00000037944(Ccr7),ENSMUSG00000079227(Ccr5)	-
BP	GO:0048522	positive regulation of cellular process	110	18	128	5558	0.00150274	0.0233511	ENSMUSG00000000184(Ccnd2),ENSMUSG00000000247(Lhx2),ENSMUSG00000001552(Jup),ENSMUSG00000001768(Rin2),ENSMUSG00000002104(Rapsn),ENSMUSG00000002227(Mov10),ENSMUSG00000002307(Daxx),ENSMUSG00000004040(Stat3),ENSMUSG00000004698(Hdac9),ENSMUSG00000009185(Ccl8),ENSMUSG00000010358(Ifi35),ENSMUSG00000012519(Mlkl),ENSMUSG00000014361(Mertk),ENSMUSG00000014773(Dll1),ENSMUSG00000015222(Map2),ENSMUSG00000015316…	ENSMUSG00000001227(Sema6b),ENSMUSG00000016984(Etaa1),ENSMUSG00000024056(Ndc80),ENSMUSG00000025764(Jade1),ENSMUSG00000026409(Pfkfb2),ENSMUSG00000026873(Phf19),ENSMUSG00000026883(Dab2ip),ENSMUSG00000028933(Xrcc2),ENSMUSG00000034758(Tle6),ENSMUSG00000034957(Cebpa),ENSMUSG00000036867(Smad6),ENSMUSG00000038065(Mturn),ENSMUSG00000038797(Zscan2),ENSMUSG00000042745(Id1),ENSMUSG00000052934(Fbxo31),ENSMUSG…
BP	GO:0060340	positive regulation of type I interferon-mediated signaling pathway	3	0	3	13	0.00151416	0.0234675	ENSMUSG00000025498(Irf7),ENSMUSG00000027514(Zbp1),ENSMUSG00000074151(Nlrc5)	-
BP	GO:2000026	regulation of multicellular organismal development	49	9	58	2145	0.00156225	0.02415	ENSMUSG00000000247(Lhx2),ENSMUSG00000001552(Jup),ENSMUSG00000001768(Rin2),ENSMUSG00000002227(Mov10),ENSMUSG00000004040(Stat3),ENSMUSG00000004698(Hdac9),ENSMUSG00000014773(Dll1),ENSMUSG00000015222(Map2),ENSMUSG00000021127(Zfp36l1),ENSMUSG00000021367(Edn1),ENSMUSG00000022901(Cd86),ENSMUSG00000023206(Il15ra),ENSMUSG00000023367(Tmem176a),ENSMUSG00000024079(Eif2ak2),ENSMUSG00000024238(Zeb1),ENSMUSG000…	ENSMUSG00000001227(Sema6b),ENSMUSG00000023915(Tnfrsf21),ENSMUSG00000026883(Dab2ip),ENSMUSG00000028933(Xrcc2),ENSMUSG00000034758(Tle6),ENSMUSG00000038065(Mturn),ENSMUSG00000042745(Id1),ENSMUSG00000052934(Fbxo31),ENSMUSG00000056501(Cebpb)
CC	GO:0031965	nuclear membrane	14	0	14	299	0.0015753	0.024289	ENSMUSG00000000184(Ccnd2),ENSMUSG00000023206(Il15ra),ENSMUSG00000029810(Tmem176b),ENSMUSG00000030409(Dmpk),ENSMUSG00000034329(Brip1),ENSMUSG00000036986(Pml),ENSMUSG00000044703(Phf11a),ENSMUSG00000054072(Iigp1),ENSMUSG00000063800(Prpf38a),ENSMUSG00000068245(Phf11d),ENSMUSG00000079017(Ifi27l2a),ENSMUSG00000091144(Phf11c),ENSMUSG00000091649(Phf11b),ENSMUSG00000117975(Itprip)	-
BP	GO:0002825	regulation of T-helper 1 type immune response	4	0	4	28	0.00159249	0.0244278	ENSMUSG00000037447(Arid5a),ENSMUSG00000037944(Ccr7),ENSMUSG00000044701(Il27),ENSMUSG00000073421(H2-Ab1)	-
BP	GO:0039528	cytoplasmic pattern recognition receptor signaling pathway in response to virus	4	0	4	28	0.00159249	0.0244278	ENSMUSG00000017830(Dhx58),ENSMUSG00000026896(Ifih1),ENSMUSG00000037921(Ddx60),ENSMUSG00000040296(Ddx58)	-
BP	GO:0050921	positive regulation of chemotaxis	8	1	9	148	0.00163997	0.0250915	ENSMUSG00000015316(Slamf1),ENSMUSG00000021367(Edn1),ENSMUSG00000024397(Aif1),ENSMUSG00000024610(Cd74),ENSMUSG00000026581(Sell),ENSMUSG00000034855(Cxcl10),ENSMUSG00000037944(Ccr7),ENSMUSG00000062960(Kdr)	ENSMUSG00000028539(Artn)
CC	GO:0005789	endoplasmic reticulum membrane	32	0	32	981	0.00164742	0.0251033	ENSMUSG00000020464(Pnpt1),ENSMUSG00000020641(Rsad2),ENSMUSG00000021263(Degs2),ENSMUSG00000021364(Elovl2),ENSMUSG00000022684(Bfar),ENSMUSG00000023307(Marchf5),ENSMUSG00000024610(Cd74),ENSMUSG00000025324(Atp10a),ENSMUSG00000030409(Dmpk),ENSMUSG00000031639(Tlr3),ENSMUSG00000033847(Pla2g4c),ENSMUSG00000035929(H2-Q4),ENSMUSG00000036986(Pml),ENSMUSG00000037321(Tap1),ENSMUSG00000044583(Tlr7),ENSMUSG0000…	-
BP	GO:0002688	regulation of leukocyte chemotaxis	8	0	8	120	0.00164915	0.0251033	ENSMUSG00000015316(Slamf1),ENSMUSG00000021367(Edn1),ENSMUSG00000024397(Aif1),ENSMUSG00000024610(Cd74),ENSMUSG00000026581(Sell),ENSMUSG00000034855(Cxcl10),ENSMUSG00000035352(Ccl12),ENSMUSG00000037944(Ccr7)	-
BP	GO:0002832	negative regulation of response to biotic stimulus	7	0	7	94	0.00169469	0.0257308	ENSMUSG00000017830(Dhx58),ENSMUSG00000026535(Ifi202b),ENSMUSG00000026770(Il2ra),ENSMUSG00000027639(Samhd1),ENSMUSG00000037321(Tap1),ENSMUSG00000039899(Fgl2),ENSMUSG00000074151(Nlrc5)	-
CC	GO:0110165	cellular anatomical entity	300	74	374	19288	0.00175939	0.0266454	ENSMUSG00000000184(Ccnd2),ENSMUSG00000000247(Lhx2),ENSMUSG00000001128(Cfp),ENSMUSG00000001156(Mxd1),ENSMUSG00000001552(Jup),ENSMUSG00000001768(Rin2),ENSMUSG00000002104(Rapsn),ENSMUSG00000002227(Mov10),ENSMUSG00000002307(Daxx),ENSMUSG00000003617(Cp),ENSMUSG00000004040(Stat3),ENSMUSG00000004698(Hdac9),ENSMUSG00000005237(Dnah2),ENSMUSG00000006310(Zbtb32),ENSMUSG00000006411(Nectin4),ENSMUSG0000000918…	ENSMUSG00000000983(Wfdc18),ENSMUSG00000001227(Sema6b),ENSMUSG00000002769(Gnmt),ENSMUSG00000004105(Angptl2),ENSMUSG00000006641(Slc5a6),ENSMUSG00000009566(Fpgs),ENSMUSG00000016984(Etaa1),ENSMUSG00000019158(Tmem160),ENSMUSG00000020974(Pole2),ENSMUSG00000022474(Pmm1),ENSMUSG00000022494(Shisa9),ENSMUSG00000022621(Rabl2),ENSMUSG00000023915(Tnfrsf21),ENSMUSG00000024056(Ndc80),ENSMUSG00000025732(Mcrip2),…
BP	GO:0019362	pyridine nucleotide metabolic process	3	1	4	29	0.00182093	0.027369	ENSMUSG00000026866(Kynu),ENSMUSG00000028100(Nudt17),ENSMUSG00000031549(Ido2)	ENSMUSG00000032456(Nmnat3)
BP	GO:0046496	nicotinamide nucleotide metabolic process	3	1	4	29	0.00182093	0.027369	ENSMUSG00000026866(Kynu),ENSMUSG00000028100(Nudt17),ENSMUSG00000031549(Ido2)	ENSMUSG00000032456(Nmnat3)
BP	GO:0071624	positive regulation of granulocyte chemotaxis	4	0	4	29	0.00182093	0.027369	ENSMUSG00000021367(Edn1),ENSMUSG00000024610(Cd74),ENSMUSG00000026581(Sell),ENSMUSG00000037944(Ccr7)	-
MF	GO:0048248	CXCR3 chemokine receptor binding	2	0	2	4	0.00187943	0.0281333	ENSMUSG00000029417(Cxcl9),ENSMUSG00000034855(Cxcl10)	-
BP	GO:0002687	positive regulation of leukocyte migration	9	0	9	151	0.00188282	0.0281333	ENSMUSG00000015316(Slamf1),ENSMUSG00000020717(Pecam1),ENSMUSG00000021367(Edn1),ENSMUSG00000024397(Aif1),ENSMUSG00000024610(Cd74),ENSMUSG00000026581(Sell),ENSMUSG00000034855(Cxcl10),ENSMUSG00000035352(Ccl12),ENSMUSG00000037944(Ccr7)	-
BP	GO:0050793	regulation of developmental process	59	11	70	2724	0.00188592	0.0281333	ENSMUSG00000000247(Lhx2),ENSMUSG00000001552(Jup),ENSMUSG00000001768(Rin2),ENSMUSG00000002227(Mov10),ENSMUSG00000004040(Stat3),ENSMUSG00000004698(Hdac9),ENSMUSG00000009185(Ccl8),ENSMUSG00000014773(Dll1),ENSMUSG00000015222(Map2),ENSMUSG00000020464(Pnpt1),ENSMUSG00000021127(Zfp36l1),ENSMUSG00000021367(Edn1),ENSMUSG00000022901(Cd86),ENSMUSG00000023206(Il15ra),ENSMUSG00000023307(Marchf5),ENSMUSG000000…	ENSMUSG00000001227(Sema6b),ENSMUSG00000023915(Tnfrsf21),ENSMUSG00000026883(Dab2ip),ENSMUSG00000028933(Xrcc2),ENSMUSG00000034758(Tle6),ENSMUSG00000034957(Cebpa),ENSMUSG00000036867(Smad6),ENSMUSG00000038065(Mturn),ENSMUSG00000042745(Id1),ENSMUSG00000052934(Fbxo31),ENSMUSG00000056501(Cebpb)
BP	GO:0045785	positive regulation of cell adhesion	17	0	17	418	0.00190709	0.0283781	ENSMUSG00000001552(Jup),ENSMUSG00000001768(Rin2),ENSMUSG00000015316(Slamf1),ENSMUSG00000022901(Cd86),ENSMUSG00000024397(Aif1),ENSMUSG00000024610(Cd74),ENSMUSG00000026770(Il2ra),ENSMUSG00000029204(Rhoh),ENSMUSG00000031712(Il15),ENSMUSG00000036594(H2-Aa),ENSMUSG00000037944(Ccr7),ENSMUSG00000062960(Kdr),ENSMUSG00000073421(H2-Ab1),ENSMUSG00000074570(Cass4),ENSMUSG00000079227(Ccr5),ENSMUSG00000095028(…	-
BP	GO:1901342	regulation of vasculature development	13	2	15	347	0.00193648	0.0287437	ENSMUSG00000001552(Jup),ENSMUSG00000001768(Rin2),ENSMUSG00000004040(Stat3),ENSMUSG00000004698(Hdac9),ENSMUSG00000014773(Dll1),ENSMUSG00000026222(Sp100),ENSMUSG00000030671(Pde3b),ENSMUSG00000031639(Tlr3),ENSMUSG00000033470(Cysltr2),ENSMUSG00000034855(Cxcl10),ENSMUSG00000036986(Pml),ENSMUSG00000062232(Rapgef2),ENSMUSG00000062960(Kdr)	ENSMUSG00000026883(Dab2ip),ENSMUSG00000042745(Id1)
CC	GO:0005634	nucleus	127	35	162	7197	0.00194815	0.0287734	ENSMUSG00000000184(Ccnd2),ENSMUSG00000000247(Lhx2),ENSMUSG00000001156(Mxd1),ENSMUSG00000001552(Jup),ENSMUSG00000002227(Mov10),ENSMUSG00000002307(Daxx),ENSMUSG00000004040(Stat3),ENSMUSG00000004698(Hdac9),ENSMUSG00000006310(Zbtb32),ENSMUSG00000010358(Ifi35),ENSMUSG00000012519(Mlkl),ENSMUSG00000014773(Dll1),ENSMUSG00000015222(Map2),ENSMUSG00000019979(Apaf1),ENSMUSG00000020186(Csrp2),ENSMUSG000000204…	ENSMUSG00000016984(Etaa1),ENSMUSG00000020974(Pole2),ENSMUSG00000024056(Ndc80),ENSMUSG00000025732(Mcrip2),ENSMUSG00000025764(Jade1),ENSMUSG00000026409(Pfkfb2),ENSMUSG00000026785(Pkn3),ENSMUSG00000026873(Phf19),ENSMUSG00000027379(Bub1),ENSMUSG00000028621(Cyb5rl),ENSMUSG00000028933(Xrcc2),ENSMUSG00000030322(Mbd4),ENSMUSG00000030852(Tacc2),ENSMUSG00000031458(Coprs),ENSMUSG00000031671(Setd6),ENSMUSG00…
BP	GO:2001199	negative regulation of dendritic cell differentiation	2	0	2	4	0.00195319	0.0287734	ENSMUSG00000023367(Tmem176a),ENSMUSG00000029810(Tmem176b)	-
BP	GO:0002703	regulation of leukocyte mediated immunity	11	0	11	213	0.00195493	0.0287734	ENSMUSG00000015316(Slamf1),ENSMUSG00000015947(Fcgr1),ENSMUSG00000020641(Rsad2),ENSMUSG00000030149(Klrk1),ENSMUSG00000031639(Tlr3),ENSMUSG00000037321(Tap1),ENSMUSG00000037447(Arid5a),ENSMUSG00000040296(Ddx58),ENSMUSG00000045322(Tlr9),ENSMUSG00000048806(Ifnb1),ENSMUSG00000057135(Scimp)	-
BP	GO:0007155	cell adhesion	37	3	40	1356	0.00195776	0.0287734	ENSMUSG00000001552(Jup),ENSMUSG00000001768(Rin2),ENSMUSG00000006411(Nectin4),ENSMUSG00000014361(Mertk),ENSMUSG00000014773(Dll1),ENSMUSG00000015316(Slamf1),ENSMUSG00000020717(Pecam1),ENSMUSG00000021127(Zfp36l1),ENSMUSG00000022901(Cd86),ENSMUSG00000024397(Aif1),ENSMUSG00000024610(Cd74),ENSMUSG00000026581(Sell),ENSMUSG00000026770(Il2ra),ENSMUSG00000026981(Il1rn),ENSMUSG00000029204(Rhoh),ENSMUSG00000…	ENSMUSG00000023915(Tnfrsf21),ENSMUSG00000036867(Smad6),ENSMUSG00000056501(Cebpb)
BP	GO:0002700	regulation of production of molecular mediator of immune response	9	0	9	152	0.00196986	0.02888	ENSMUSG00000015316(Slamf1),ENSMUSG00000020641(Rsad2),ENSMUSG00000024610(Cd74),ENSMUSG00000031639(Tlr3),ENSMUSG00000037447(Arid5a),ENSMUSG00000040296(Ddx58),ENSMUSG00000045322(Tlr9),ENSMUSG00000048806(Ifnb1),ENSMUSG00000057135(Scimp)	-
BP	GO:0002690	positive regulation of leukocyte chemotaxis	7	0	7	97	0.0020303	0.0295571	ENSMUSG00000015316(Slamf1),ENSMUSG00000021367(Edn1),ENSMUSG00000024397(Aif1),ENSMUSG00000024610(Cd74),ENSMUSG00000026581(Sell),ENSMUSG00000034855(Cxcl10),ENSMUSG00000037944(Ccr7)	-
BP	GO:0043507	positive regulation of JUN kinase activity	5	1	6	72	0.00203441	0.0295571	ENSMUSG00000012519(Mlkl),ENSMUSG00000021367(Edn1),ENSMUSG00000026981(Il1rn),ENSMUSG00000037944(Ccr7),ENSMUSG00000045322(Tlr9)	ENSMUSG00000026883(Dab2ip)
CC	GO:0000942	condensed nuclear chromosome outer kinetochore	0	2	2	4	0.00203586	0.0295571	-	ENSMUSG00000024056(Ndc80),ENSMUSG00000027379(Bub1)
CC	GO:0036488	CHOP-C/EBP complex	0	2	2	4	0.00203586	0.0295571	-	ENSMUSG00000034957(Cebpa),ENSMUSG00000056501(Cebpb)
BP	GO:0002230	positive regulation of defense response to virus by host	4	0	4	30	0.00207111	0.0299959	ENSMUSG00000036986(Pml),ENSMUSG00000037860(Aim2),ENSMUSG00000040296(Ddx58),ENSMUSG00000044701(Il27)	-
BP	GO:0007162	negative regulation of cell adhesion	11	2	13	281	0.00211584	0.0305696	ENSMUSG00000022901(Cd86),ENSMUSG00000024610(Cd74),ENSMUSG00000026770(Il2ra),ENSMUSG00000026981(Il1rn),ENSMUSG00000030671(Pde3b),ENSMUSG00000031628(Casp3),ENSMUSG00000036594(H2-Aa),ENSMUSG00000039899(Fgl2),ENSMUSG00000048806(Ifnb1),ENSMUSG00000073421(H2-Ab1),ENSMUSG00000078763(Slfn1)	ENSMUSG00000023915(Tnfrsf21),ENSMUSG00000056501(Cebpb)
BP	GO:0030595	leukocyte chemotaxis	11	0	11	216	0.00218085	0.0314327	ENSMUSG00000009185(Ccl8),ENSMUSG00000015316(Slamf1),ENSMUSG00000021367(Edn1),ENSMUSG00000024397(Aif1),ENSMUSG00000024610(Cd74),ENSMUSG00000026581(Sell),ENSMUSG00000029417(Cxcl9),ENSMUSG00000034855(Cxcl10),ENSMUSG00000035352(Ccl12),ENSMUSG00000037944(Ccr7),ENSMUSG00000048534(Jaml)	-
BP	GO:0045930	negative regulation of mitotic cell cycle	7	4	11	217	0.0022607	0.0325051	ENSMUSG00000020415(Pttg1),ENSMUSG00000020464(Pnpt1),ENSMUSG00000021127(Zfp36l1),ENSMUSG00000027641(Rbl1),ENSMUSG00000035352(Ccl12),ENSMUSG00000036986(Pml),ENSMUSG00000078763(Slfn1)	ENSMUSG00000024056(Ndc80),ENSMUSG00000025764(Jade1),ENSMUSG00000027379(Bub1),ENSMUSG00000052934(Fbxo31)
BP	GO:0051345	positive regulation of hydrolase activity	22	2	24	695	0.00231033	0.0331389	ENSMUSG00000001768(Rin2),ENSMUSG00000004040(Stat3),ENSMUSG00000009185(Ccl8),ENSMUSG00000019979(Apaf1),ENSMUSG00000020709(Adap2),ENSMUSG00000021886(Gpr65),ENSMUSG00000022901(Cd86),ENSMUSG00000023903(Mmp25),ENSMUSG00000026358(Rgs1),ENSMUSG00000026360(Rgs2),ENSMUSG00000031292(Cdkl5),ENSMUSG00000033871(Ppargc1b),ENSMUSG00000034997(Htr2a),ENSMUSG00000035352(Ccl12),ENSMUSG00000036986(Pml),ENSMUSG000000…	ENSMUSG00000026883(Dab2ip),ENSMUSG00000039831(Arhgap29)
BP	GO:0002724	regulation of T cell cytokine production	4	0	4	31	0.00234405	0.0332775	ENSMUSG00000015316(Slamf1),ENSMUSG00000020641(Rsad2),ENSMUSG00000037447(Arid5a),ENSMUSG00000048806(Ifnb1)	-
BP	GO:0060700	regulation of ribonuclease activity	3	0	3	15	0.00234438	0.0332775	ENSMUSG00000032661(Oas3),ENSMUSG00000041827(Oasl1),ENSMUSG00000066861(Oas1g)	-
BP	GO:0052372	modulation by symbiont of entry into host	5	0	5	51	0.00234648	0.0332775	ENSMUSG00000024610(Cd74),ENSMUSG00000025492(Ifitm3),ENSMUSG00000030921(Trim30a),ENSMUSG00000057596(Trim30d),ENSMUSG00000078616(Trim30c)	-
BP	GO:2001222	regulation of neuron migration	3	2	5	51	0.00234648	0.0332775	ENSMUSG00000004040(Stat3),ENSMUSG00000054728(Phactr1),ENSMUSG00000062232(Rapgef2)	ENSMUSG00000026883(Dab2ip),ENSMUSG00000052934(Fbxo31)
CC	GO:0005829	cytosol	81	14	95	3875	0.0023489	0.0332775	ENSMUSG00000000184(Ccnd2),ENSMUSG00000001156(Mxd1),ENSMUSG00000001552(Jup),ENSMUSG00000002104(Rapsn),ENSMUSG00000002227(Mov10),ENSMUSG00000004040(Stat3),ENSMUSG00000010358(Ifi35),ENSMUSG00000012519(Mlkl),ENSMUSG00000019979(Apaf1),ENSMUSG00000020415(Pttg1),ENSMUSG00000020464(Pnpt1),ENSMUSG00000021127(Zfp36l1),ENSMUSG00000022876(Samsn1),ENSMUSG00000024079(Eif2ak2),ENSMUSG00000024238(Zeb1),ENSMUSG00…	ENSMUSG00000002769(Gnmt),ENSMUSG00000009566(Fpgs),ENSMUSG00000016984(Etaa1),ENSMUSG00000022474(Pmm1),ENSMUSG00000025764(Jade1),ENSMUSG00000027379(Bub1),ENSMUSG00000030852(Tacc2),ENSMUSG00000031458(Coprs),ENSMUSG00000031671(Setd6),ENSMUSG00000033863(Klf9),ENSMUSG00000034758(Tle6),ENSMUSG00000036867(Smad6),ENSMUSG00000038644(Pold1),ENSMUSG00000066839(Ecsit)
BP	GO:0010942	positive regulation of cell death	23	1	24	696	0.00235346	0.0332775	ENSMUSG00000002104(Rapsn),ENSMUSG00000002307(Daxx),ENSMUSG00000016524(Il19),ENSMUSG00000019979(Apaf1),ENSMUSG00000024079(Eif2ak2),ENSMUSG00000027514(Zbp1),ENSMUSG00000030149(Klrk1),ENSMUSG00000030560(Ctsc),ENSMUSG00000031628(Casp3),ENSMUSG00000031639(Tlr3),ENSMUSG00000033470(Cysltr2),ENSMUSG00000035352(Ccl12),ENSMUSG00000035683(Melk),ENSMUSG00000036887(C1qa),ENSMUSG00000036986(Pml),ENSMUSG0000003…	ENSMUSG00000026883(Dab2ip)
BP	GO:0051252	regulation of RNA metabolic process	68	21	89	3669	0.00241797	0.0341088	ENSMUSG00000000247(Lhx2),ENSMUSG00000001156(Mxd1),ENSMUSG00000001552(Jup),ENSMUSG00000002227(Mov10),ENSMUSG00000002307(Daxx),ENSMUSG00000004040(Stat3),ENSMUSG00000004698(Hdac9),ENSMUSG00000006310(Zbtb32),ENSMUSG00000014773(Dll1),ENSMUSG00000020464(Pnpt1),ENSMUSG00000021127(Zfp36l1),ENSMUSG00000021367(Edn1),ENSMUSG00000024079(Eif2ak2),ENSMUSG00000024238(Zeb1),ENSMUSG00000024610(Cd74),ENSMUSG000000…	ENSMUSG00000025764(Jade1),ENSMUSG00000026873(Phf19),ENSMUSG00000026883(Dab2ip),ENSMUSG00000030145(Zfp248),ENSMUSG00000031671(Setd6),ENSMUSG00000034758(Tle6),ENSMUSG00000034800(Zfp661),ENSMUSG00000034957(Cebpa),ENSMUSG00000036867(Smad6),ENSMUSG00000038065(Mturn),ENSMUSG00000038797(Zscan2),ENSMUSG00000042745(Id1),ENSMUSG00000043866(Taf10),ENSMUSG00000046658(Zfp316),ENSMUSG00000056501(Cebpb),ENSMUSG…
BP	GO:1902806	regulation of cell cycle G1/S phase transition	6	2	8	128	0.0024752	0.0348338	ENSMUSG00000000184(Ccnd2),ENSMUSG00000024397(Aif1),ENSMUSG00000027641(Rbl1),ENSMUSG00000035352(Ccl12),ENSMUSG00000036986(Pml),ENSMUSG00000078763(Slfn1)	ENSMUSG00000025764(Jade1),ENSMUSG00000052934(Fbxo31)
BP	GO:0045595	regulation of cell differentiation	41	11	52	1915	0.00254219	0.0356923	ENSMUSG00000000247(Lhx2),ENSMUSG00000001768(Rin2),ENSMUSG00000002227(Mov10),ENSMUSG00000004040(Stat3),ENSMUSG00000009185(Ccl8),ENSMUSG00000014773(Dll1),ENSMUSG00000015222(Map2),ENSMUSG00000021127(Zfp36l1),ENSMUSG00000021367(Edn1),ENSMUSG00000023206(Il15ra),ENSMUSG00000023367(Tmem176a),ENSMUSG00000024079(Eif2ak2),ENSMUSG00000024238(Zeb1),ENSMUSG00000024610(Cd74),ENSMUSG00000026121(Sema4c),ENSMUSG0…	ENSMUSG00000001227(Sema6b),ENSMUSG00000023915(Tnfrsf21),ENSMUSG00000026883(Dab2ip),ENSMUSG00000028933(Xrcc2),ENSMUSG00000034758(Tle6),ENSMUSG00000034957(Cebpa),ENSMUSG00000036867(Smad6),ENSMUSG00000038065(Mturn),ENSMUSG00000042745(Id1),ENSMUSG00000052934(Fbxo31),ENSMUSG00000056501(Cebpb)
BP	GO:0050671	positive regulation of lymphocyte proliferation	8	0	8	129	0.00259784	0.0363028	ENSMUSG00000015316(Slamf1),ENSMUSG00000022901(Cd86),ENSMUSG00000024397(Aif1),ENSMUSG00000024610(Cd74),ENSMUSG00000026770(Il2ra),ENSMUSG00000031712(Il15),ENSMUSG00000037944(Ccr7),ENSMUSG00000045322(Tlr9)	-
BP	GO:0070555	response to interleukin-1	6	2	8	129	0.00259784	0.0363028	ENSMUSG00000009185(Ccl8),ENSMUSG00000021367(Edn1),ENSMUSG00000026981(Il1rn),ENSMUSG00000027514(Zbp1),ENSMUSG00000035352(Ccl12),ENSMUSG00000064090(Vrk2)	ENSMUSG00000026883(Dab2ip),ENSMUSG00000056501(Cebpb)
BP	GO:0070374	positive regulation of ERK1 and ERK2 cascade	10	1	11	221	0.00260418	0.0363063	ENSMUSG00000009185(Ccl8),ENSMUSG00000015316(Slamf1),ENSMUSG00000024610(Cd74),ENSMUSG00000033470(Cysltr2),ENSMUSG00000034997(Htr2a),ENSMUSG00000035352(Ccl12),ENSMUSG00000038058(Nod1),ENSMUSG00000057135(Scimp),ENSMUSG00000062232(Rapgef2),ENSMUSG00000062960(Kdr)	ENSMUSG00000038065(Mturn)
BP	GO:0065007	biological regulation	212	53	265	13067	0.00262576	0.036522	ENSMUSG00000000184(Ccnd2),ENSMUSG00000000247(Lhx2),ENSMUSG00000001128(Cfp),ENSMUSG00000001156(Mxd1),ENSMUSG00000001552(Jup),ENSMUSG00000001768(Rin2),ENSMUSG00000002104(Rapsn),ENSMUSG00000002227(Mov10),ENSMUSG00000002307(Daxx),ENSMUSG00000003617(Cp),ENSMUSG00000004040(Stat3),ENSMUSG00000004698(Hdac9),ENSMUSG00000006310(Zbtb32),ENSMUSG00000009185(Ccl8),ENSMUSG00000010358(Ifi35),ENSMUSG00000012519(M…	ENSMUSG00000000983(Wfdc18),ENSMUSG00000001227(Sema6b),ENSMUSG00000002769(Gnmt),ENSMUSG00000016984(Etaa1),ENSMUSG00000022494(Shisa9),ENSMUSG00000023915(Tnfrsf21),ENSMUSG00000024056(Ndc80),ENSMUSG00000024186(Rgs11),ENSMUSG00000025764(Jade1),ENSMUSG00000025931(Paqr8),ENSMUSG00000026409(Pfkfb2),ENSMUSG00000026785(Pkn3),ENSMUSG00000026873(Phf19),ENSMUSG00000026883(Dab2ip),ENSMUSG00000026975(Dph7),ENSM…
BP	GO:0001779	natural killer cell differentiation	4	0	4	32	0.00264075	0.03656	ENSMUSG00000014361(Mertk),ENSMUSG00000015316(Slamf1),ENSMUSG00000023206(Il15ra),ENSMUSG00000031712(Il15)	-
BP	GO:0002369	T cell cytokine production	4	0	4	32	0.00264075	0.03656	ENSMUSG00000015316(Slamf1),ENSMUSG00000020641(Rsad2),ENSMUSG00000037447(Arid5a),ENSMUSG00000048806(Ifnb1)	-
MF	GO:0008134	transcription factor binding	16	7	23	676	0.00266029	0.0366904	ENSMUSG00000000247(Lhx2),ENSMUSG00000001552(Jup),ENSMUSG00000002307(Daxx),ENSMUSG00000004040(Stat3),ENSMUSG00000004698(Hdac9),ENSMUSG00000014773(Dll1),ENSMUSG00000026536(Ifi211),ENSMUSG00000027641(Rbl1),ENSMUSG00000033871(Ppargc1b),ENSMUSG00000037447(Arid5a),ENSMUSG00000043263(Ifi209),ENSMUSG00000054203(Ifi205),ENSMUSG00000056476(Med12l),ENSMUSG00000066677(Ifi208),ENSMUSG00000073421(H2-Ab1),ENSMU…	ENSMUSG00000030852(Tacc2),ENSMUSG00000031671(Setd6),ENSMUSG00000034758(Tle6),ENSMUSG00000034957(Cebpa),ENSMUSG00000042745(Id1),ENSMUSG00000043866(Taf10),ENSMUSG00000056501(Cebpb)
BP	GO:0043085	positive regulation of catalytic activity	34	4	38	1292	0.00266247	0.0366904	ENSMUSG00000000184(Ccnd2),ENSMUSG00000001768(Rin2),ENSMUSG00000002307(Daxx),ENSMUSG00000004040(Stat3),ENSMUSG00000009185(Ccl8),ENSMUSG00000012519(Mlkl),ENSMUSG00000014361(Mertk),ENSMUSG00000015947(Fcgr1),ENSMUSG00000019979(Apaf1),ENSMUSG00000020709(Adap2),ENSMUSG00000021367(Edn1),ENSMUSG00000021886(Gpr65),ENSMUSG00000022901(Cd86),ENSMUSG00000023903(Mmp25),ENSMUSG00000024079(Eif2ak2),ENSMUSG000000…	ENSMUSG00000016984(Etaa1),ENSMUSG00000026409(Pfkfb2),ENSMUSG00000026883(Dab2ip),ENSMUSG00000039831(Arhgap29)
BP	GO:0008283	cell population proliferation	42	12	54	2012	0.00268736	0.0369481	ENSMUSG00000000184(Ccnd2),ENSMUSG00000000247(Lhx2),ENSMUSG00000001552(Jup),ENSMUSG00000004040(Stat3),ENSMUSG00000006310(Zbtb32),ENSMUSG00000010358(Ifi35),ENSMUSG00000014773(Dll1),ENSMUSG00000015316(Slamf1),ENSMUSG00000018986(Slfn3),ENSMUSG00000020415(Pttg1),ENSMUSG00000021127(Zfp36l1),ENSMUSG00000021367(Edn1),ENSMUSG00000022901(Cd86),ENSMUSG00000024079(Eif2ak2),ENSMUSG00000024238(Zeb1),ENSMUSG000…	ENSMUSG00000009566(Fpgs),ENSMUSG00000023915(Tnfrsf21),ENSMUSG00000026883(Dab2ip),ENSMUSG00000027379(Bub1),ENSMUSG00000030852(Tacc2),ENSMUSG00000033863(Klf9),ENSMUSG00000034957(Cebpa),ENSMUSG00000036867(Smad6),ENSMUSG00000042745(Id1),ENSMUSG00000046006(Gapt),ENSMUSG00000056501(Cebpb),ENSMUSG00000069272(H2ac8)
MF	GO:0140416	DNA-binding transcription factor inhibitor activity	1	2	3	16	0.00269383	0.0369519	ENSMUSG00000002307(Daxx)	ENSMUSG00000036867(Smad6),ENSMUSG00000042745(Id1)
BP	GO:0071622	regulation of granulocyte chemotaxis	5	0	5	53	0.00278264	0.0380826	ENSMUSG00000015316(Slamf1),ENSMUSG00000021367(Edn1),ENSMUSG00000024610(Cd74),ENSMUSG00000026581(Sell),ENSMUSG00000037944(Ccr7)	-
BP	GO:0002495	antigen processing and presentation of peptide antigen via MHC class II	3	0	3	16	0.00284655	0.0383614	ENSMUSG00000024610(Cd74),ENSMUSG00000036594(H2-Aa),ENSMUSG00000073421(H2-Ab1)	-
BP	GO:0009435	NAD biosynthetic process	2	1	3	16	0.00284655	0.0383614	ENSMUSG00000026866(Kynu),ENSMUSG00000031549(Ido2)	ENSMUSG00000032456(Nmnat3)
BP	GO:0044068	modulation by symbiont of host cellular process	3	0	3	16	0.00284655	0.0383614	ENSMUSG00000046879(Irgm1),ENSMUSG00000069874(Irgm2),ENSMUSG00000079227(Ccr5)	-
BP	GO:0060330	regulation of response to interferon-gamma	3	0	3	16	0.00284655	0.0383614	ENSMUSG00000046879(Irgm1),ENSMUSG00000069874(Irgm2),ENSMUSG00000074151(Nlrc5)	-
BP	GO:0060334	regulation of interferon-gamma-mediated signaling pathway	3	0	3	16	0.00284655	0.0383614	ENSMUSG00000046879(Irgm1),ENSMUSG00000069874(Irgm2),ENSMUSG00000074151(Nlrc5)	-
BP	GO:0061158	3'-UTR-mediated mRNA destabilization	3	0	3	16	0.00284655	0.0383614	ENSMUSG00000002227(Mov10),ENSMUSG00000021127(Zfp36l1),ENSMUSG00000044786(Zfp36)	-
BP	GO:0050764	regulation of phagocytosis	7	0	7	103	0.00285389	0.0383614	ENSMUSG00000014361(Mertk),ENSMUSG00000015947(Fcgr1),ENSMUSG00000023206(Il15ra),ENSMUSG00000031712(Il15),ENSMUSG00000037944(Ccr7),ENSMUSG00000095028(Sirpb1b),ENSMUSG00000095788(Sirpb1a)	-
BP	GO:0032946	positive regulation of mononuclear cell proliferation	8	0	8	131	0.00285734	0.0383614	ENSMUSG00000015316(Slamf1),ENSMUSG00000022901(Cd86),ENSMUSG00000024397(Aif1),ENSMUSG00000024610(Cd74),ENSMUSG00000026770(Il2ra),ENSMUSG00000031712(Il15),ENSMUSG00000037944(Ccr7),ENSMUSG00000045322(Tlr9)	-
BP	GO:0032088	negative regulation of NF-kappaB transcription factor activity	3	3	6	77	0.00286118	0.0383614	ENSMUSG00000037860(Aim2),ENSMUSG00000045322(Tlr9),ENSMUSG00000074151(Nlrc5)	ENSMUSG00000026883(Dab2ip),ENSMUSG00000031671(Setd6),ENSMUSG00000038065(Mturn)
BP	GO:0010468	regulation of gene expression	87	23	110	4736	0.0028673	0.0383614	ENSMUSG00000000247(Lhx2),ENSMUSG00000001156(Mxd1),ENSMUSG00000001552(Jup),ENSMUSG00000002227(Mov10),ENSMUSG00000002307(Daxx),ENSMUSG00000004040(Stat3),ENSMUSG00000004698(Hdac9),ENSMUSG00000006310(Zbtb32),ENSMUSG00000014361(Mertk),ENSMUSG00000014773(Dll1),ENSMUSG00000015316(Slamf1),ENSMUSG00000017830(Dhx58),ENSMUSG00000020464(Pnpt1),ENSMUSG00000020641(Rsad2),ENSMUSG00000021127(Zfp36l1),ENSMUSG0000…	ENSMUSG00000023915(Tnfrsf21),ENSMUSG00000025764(Jade1),ENSMUSG00000026873(Phf19),ENSMUSG00000026883(Dab2ip),ENSMUSG00000026975(Dph7),ENSMUSG00000030145(Zfp248),ENSMUSG00000031671(Setd6),ENSMUSG00000034758(Tle6),ENSMUSG00000034800(Zfp661),ENSMUSG00000034957(Cebpa),ENSMUSG00000036867(Smad6),ENSMUSG00000038065(Mturn),ENSMUSG00000038797(Zscan2),ENSMUSG00000042745(Id1),ENSMUSG00000043866(Taf10),ENSMUS…
BP	GO:1901988	negative regulation of cell cycle phase transition	5	4	9	161	0.00290663	0.0388006	ENSMUSG00000021127(Zfp36l1),ENSMUSG00000027641(Rbl1),ENSMUSG00000035352(Ccl12),ENSMUSG00000036986(Pml),ENSMUSG00000078763(Slfn1)	ENSMUSG00000024056(Ndc80),ENSMUSG00000025764(Jade1),ENSMUSG00000027379(Bub1),ENSMUSG00000052934(Fbxo31)
BP	GO:0072524	pyridine-containing compound metabolic process	3	1	4	33	0.00296222	0.0393658	ENSMUSG00000026866(Kynu),ENSMUSG00000028100(Nudt17),ENSMUSG00000031549(Ido2)	ENSMUSG00000032456(Nmnat3)
BP	GO:0090022	regulation of neutrophil chemotaxis	4	0	4	33	0.00296222	0.0393658	ENSMUSG00000021367(Edn1),ENSMUSG00000024610(Cd74),ENSMUSG00000026581(Sell),ENSMUSG00000037944(Ccr7)	-
CC	GO:0005635	nuclear envelope	18	0	18	464	0.00296876	0.0393658	ENSMUSG00000000184(Ccnd2),ENSMUSG00000022938(Fam3b),ENSMUSG00000023206(Il15ra),ENSMUSG00000029810(Tmem176b),ENSMUSG00000030409(Dmpk),ENSMUSG00000033847(Pla2g4c),ENSMUSG00000034329(Brip1),ENSMUSG00000036986(Pml),ENSMUSG00000037997(Parp11),ENSMUSG00000044703(Phf11a),ENSMUSG00000054072(Iigp1),ENSMUSG00000063800(Prpf38a),ENSMUSG00000064090(Vrk2),ENSMUSG00000068245(Phf11d),ENSMUSG00000079017(Ifi27l2a)…	-
BP	GO:0002699	positive regulation of immune effector process	11	0	11	225	0.00298865	0.0395416	ENSMUSG00000015947(Fcgr1),ENSMUSG00000017830(Dhx58),ENSMUSG00000020641(Rsad2),ENSMUSG00000024610(Cd74),ENSMUSG00000030149(Klrk1),ENSMUSG00000037447(Arid5a),ENSMUSG00000037921(Ddx60),ENSMUSG00000037944(Ccr7),ENSMUSG00000040296(Ddx58),ENSMUSG00000045322(Tlr9),ENSMUSG00000057135(Scimp)	-
BP	GO:0019438	aromatic compound biosynthetic process	69	27	96	4042	0.00300127	0.0396207	ENSMUSG00000000247(Lhx2),ENSMUSG00000001156(Mxd1),ENSMUSG00000001552(Jup),ENSMUSG00000002307(Daxx),ENSMUSG00000004040(Stat3),ENSMUSG00000004698(Hdac9),ENSMUSG00000006310(Zbtb32),ENSMUSG00000014773(Dll1),ENSMUSG00000019990(Pde7b),ENSMUSG00000020638(Cmpk2),ENSMUSG00000021367(Edn1),ENSMUSG00000024079(Eif2ak2),ENSMUSG00000024238(Zeb1),ENSMUSG00000024610(Cd74),ENSMUSG00000024805(Pcgf5),ENSMUSG00000025…	ENSMUSG00000009566(Fpgs),ENSMUSG00000020974(Pole2),ENSMUSG00000022474(Pmm1),ENSMUSG00000025764(Jade1),ENSMUSG00000026575(Nme7),ENSMUSG00000026873(Phf19),ENSMUSG00000026883(Dab2ip),ENSMUSG00000030145(Zfp248),ENSMUSG00000031671(Setd6),ENSMUSG00000032456(Nmnat3),ENSMUSG00000034758(Tle6),ENSMUSG00000034800(Zfp661),ENSMUSG00000034957(Cebpa),ENSMUSG00000036867(Smad6),ENSMUSG00000038065(Mturn),ENSMUSG00…
BP	GO:0002720	positive regulation of cytokine production involved in immune response	5	0	5	54	0.00302141	0.0397109	ENSMUSG00000020641(Rsad2),ENSMUSG00000024610(Cd74),ENSMUSG00000037447(Arid5a),ENSMUSG00000040296(Ddx58),ENSMUSG00000057135(Scimp)	-
BP	GO:2000107	negative regulation of leukocyte apoptotic process	5	0	5	54	0.00302141	0.0397109	ENSMUSG00000014361(Mertk),ENSMUSG00000024610(Cd74),ENSMUSG00000037944(Ccr7),ENSMUSG00000062007(Hsh2d),ENSMUSG00000079227(Ccr5)	-
MF	GO:0003873	6-phosphofructo-2-kinase activity	1	1	2	5	0.00309524	0.0405919	ENSMUSG00000026773(Pfkfb3)	ENSMUSG00000026409(Pfkfb2)
BP	GO:0007249	I-kappaB kinase/NF-kappaB signaling	10	1	11	227	0.00319733	0.041626	ENSMUSG00000024610(Cd74),ENSMUSG00000029204(Rhoh),ENSMUSG00000030921(Trim30a),ENSMUSG00000031639(Tlr3),ENSMUSG00000038058(Nod1),ENSMUSG00000039304(Tnfsf10),ENSMUSG00000044583(Tlr7),ENSMUSG00000045322(Tlr9),ENSMUSG00000057596(Trim30d),ENSMUSG00000078616(Trim30c)	ENSMUSG00000026883(Dab2ip)
BP	GO:1901701	cellular response to oxygen-containing compound	33	3	36	1219	0.00321241	0.041626	ENSMUSG00000001552(Jup),ENSMUSG00000004040(Stat3),ENSMUSG00000004698(Hdac9),ENSMUSG00000020638(Cmpk2),ENSMUSG00000021127(Zfp36l1),ENSMUSG00000021367(Edn1),ENSMUSG00000021423(Ly86),ENSMUSG00000022901(Cd86),ENSMUSG00000024238(Zeb1),ENSMUSG00000024397(Aif1),ENSMUSG00000028270(Gbp2),ENSMUSG00000029417(Cxcl9),ENSMUSG00000030149(Klrk1),ENSMUSG00000031712(Il15),ENSMUSG00000033871(Ppargc1b),ENSMUSG000000…	ENSMUSG00000026883(Dab2ip),ENSMUSG00000033863(Klf9),ENSMUSG00000056501(Cebpb)
BP	GO:0031086	nuclear-transcribed mRNA catabolic process, deadenylation-independent decay	2	0	2	5	0.00321595	0.041626	ENSMUSG00000021127(Zfp36l1),ENSMUSG00000044786(Zfp36)	-
BP	GO:0032020	ISG15-protein conjugation	2	0	2	5	0.00321595	0.041626	ENSMUSG00000032596(Uba7),ENSMUSG00000035692(Isg15)	-
BP	GO:0036324	vascular endothelial growth factor receptor-2 signaling pathway	1	1	2	5	0.00321595	0.041626	ENSMUSG00000062960(Kdr)	ENSMUSG00000026883(Dab2ip)
BP	GO:0061737	leukotriene signaling pathway	2	0	2	5	0.00321595	0.041626	ENSMUSG00000026358(Rgs1),ENSMUSG00000033470(Cysltr2)	-
MF	GO:0001217	DNA-binding transcription repressor activity	11	3	14	337	0.00324138	0.0417738	ENSMUSG00000001156(Mxd1),ENSMUSG00000006310(Zbtb32),ENSMUSG00000024238(Zeb1),ENSMUSG00000026536(Ifi211),ENSMUSG00000041515(Irf8),ENSMUSG00000041649(Klf8),ENSMUSG00000043263(Ifi209),ENSMUSG00000054203(Ifi205),ENSMUSG00000063889(Crem),ENSMUSG00000066677(Ifi208),ENSMUSG00000073489(Ifi204)	ENSMUSG00000030145(Zfp248),ENSMUSG00000056501(Cebpb),ENSMUSG00000074519(Zfp971)
MF	GO:0001227	DNA-binding transcription repressor activity, RNA polymerase II-specific	11	3	14	337	0.00324138	0.0417738	ENSMUSG00000001156(Mxd1),ENSMUSG00000006310(Zbtb32),ENSMUSG00000024238(Zeb1),ENSMUSG00000026536(Ifi211),ENSMUSG00000041515(Irf8),ENSMUSG00000041649(Klf8),ENSMUSG00000043263(Ifi209),ENSMUSG00000054203(Ifi205),ENSMUSG00000063889(Crem),ENSMUSG00000066677(Ifi208),ENSMUSG00000073489(Ifi204)	ENSMUSG00000030145(Zfp248),ENSMUSG00000056501(Cebpb),ENSMUSG00000074519(Zfp971)
BP	GO:0032613	interleukin-10 production	4	1	5	55	0.00327461	0.0421112	ENSMUSG00000004040(Stat3),ENSMUSG00000014773(Dll1),ENSMUSG00000035692(Isg15),ENSMUSG00000045322(Tlr9)	ENSMUSG00000023915(Tnfrsf21)
BP	GO:0007568	aging	14	0	14	331	0.00328867	0.042201	ENSMUSG00000004040(Stat3),ENSMUSG00000019979(Apaf1),ENSMUSG00000020464(Pnpt1),ENSMUSG00000021367(Edn1),ENSMUSG00000023307(Marchf5),ENSMUSG00000026866(Kynu),ENSMUSG00000027641(Rbl1),ENSMUSG00000030560(Ctsc),ENSMUSG00000031712(Il15),ENSMUSG00000034997(Htr2a),ENSMUSG00000036887(C1qa),ENSMUSG00000036986(Pml),ENSMUSG00000054580(Pla2r1),ENSMUSG00000079017(Ifi27l2a)	-
BP	GO:1902624	positive regulation of neutrophil migration	4	0	4	34	0.00330942	0.0423762	ENSMUSG00000021367(Edn1),ENSMUSG00000024610(Cd74),ENSMUSG00000026581(Sell),ENSMUSG00000037944(Ccr7)	-
BP	GO:0044546	NLRP3 inflammasome complex assembly	3	0	3	17	0.00341004	0.0435711	ENSMUSG00000024079(Eif2ak2),ENSMUSG00000030921(Trim30a),ENSMUSG00000037860(Aim2)	-
BP	GO:0043122	regulation of I-kappaB kinase/NF-kappaB signaling	9	1	10	198	0.00361974	0.0460834	ENSMUSG00000024610(Cd74),ENSMUSG00000029204(Rhoh),ENSMUSG00000030921(Trim30a),ENSMUSG00000031639(Tlr3),ENSMUSG00000038058(Nod1),ENSMUSG00000039304(Tnfsf10),ENSMUSG00000045322(Tlr9),ENSMUSG00000057596(Trim30d),ENSMUSG00000078616(Trim30c)	ENSMUSG00000026883(Dab2ip)
BP	GO:0010605	negative regulation of macromolecule metabolic process	60	12	72	2892	0.00362211	0.0460834	ENSMUSG00000000247(Lhx2),ENSMUSG00000001156(Mxd1),ENSMUSG00000002227(Mov10),ENSMUSG00000002307(Daxx),ENSMUSG00000004040(Stat3),ENSMUSG00000004698(Hdac9),ENSMUSG00000006310(Zbtb32),ENSMUSG00000014361(Mertk),ENSMUSG00000014773(Dll1),ENSMUSG00000015316(Slamf1),ENSMUSG00000017830(Dhx58),ENSMUSG00000020415(Pttg1),ENSMUSG00000020464(Pnpt1),ENSMUSG00000020717(Pecam1),ENSMUSG00000021127(Zfp36l1),ENSMUSG0…	ENSMUSG00000000983(Wfdc18),ENSMUSG00000023915(Tnfrsf21),ENSMUSG00000026873(Phf19),ENSMUSG00000026883(Dab2ip),ENSMUSG00000030145(Zfp248),ENSMUSG00000034758(Tle6),ENSMUSG00000034957(Cebpa),ENSMUSG00000036867(Smad6),ENSMUSG00000042745(Id1),ENSMUSG00000056501(Cebpb),ENSMUSG00000069272(H2ac8),ENSMUSG00000074519(Zfp971)
BP	GO:0002483	antigen processing and presentation of endogenous peptide antigen	4	0	4	35	0.00368333	0.0467626	ENSMUSG00000035929(H2-Q4),ENSMUSG00000037321(Tap1),ENSMUSG00000053835(H2-T24),ENSMUSG00000056116(H2-T22)	-
BP	GO:0060326	cell chemotaxis	13	0	13	300	0.00370699	0.0469267	ENSMUSG00000009185(Ccl8),ENSMUSG00000015316(Slamf1),ENSMUSG00000021367(Edn1),ENSMUSG00000024397(Aif1),ENSMUSG00000024610(Cd74),ENSMUSG00000026581(Sell),ENSMUSG00000029417(Cxcl9),ENSMUSG00000034855(Cxcl10),ENSMUSG00000035352(Ccl12),ENSMUSG00000037944(Ccr7),ENSMUSG00000048534(Jaml),ENSMUSG00000062960(Kdr),ENSMUSG00000079227(Ccr5)	-
BP	GO:0080135	regulation of cellular response to stress	20	3	23	681	0.00371198	0.0469267	ENSMUSG00000012519(Mlkl),ENSMUSG00000015316(Slamf1),ENSMUSG00000020464(Pnpt1),ENSMUSG00000021367(Edn1),ENSMUSG00000022684(Bfar),ENSMUSG00000024079(Eif2ak2),ENSMUSG00000024610(Cd74),ENSMUSG00000026121(Sema4c),ENSMUSG00000026981(Il1rn),ENSMUSG00000027641(Rbl1),ENSMUSG00000031639(Tlr3),ENSMUSG00000035299(Mid1),ENSMUSG00000036986(Pml),ENSMUSG00000037944(Ccr7),ENSMUSG00000038058(Nod1),ENSMUSG000000399…	ENSMUSG00000016984(Etaa1),ENSMUSG00000026883(Dab2ip),ENSMUSG00000038065(Mturn)
MF	GO:0019900	kinase binding	21	5	26	820	0.00372676	0.0470139	ENSMUSG00000000184(Ccnd2),ENSMUSG00000001552(Jup),ENSMUSG00000002307(Daxx),ENSMUSG00000004040(Stat3),ENSMUSG00000004698(Hdac9),ENSMUSG00000012519(Mlkl),ENSMUSG00000015222(Map2),ENSMUSG00000023206(Il15ra),ENSMUSG00000029204(Rhoh),ENSMUSG00000030149(Klrk1),ENSMUSG00000030921(Trim30a),ENSMUSG00000034765(Dusp5),ENSMUSG00000044786(Zfp36),ENSMUSG00000052087(Rgs14),ENSMUSG00000057596(Trim30d),ENSMUSG000…	ENSMUSG00000026409(Pfkfb2),ENSMUSG00000026883(Dab2ip),ENSMUSG00000028539(Artn),ENSMUSG00000034957(Cebpa),ENSMUSG00000056501(Cebpb)
BP	GO:0070371	ERK1 and ERK2 cascade	12	2	14	337	0.00385548	0.0485351	ENSMUSG00000009185(Ccl8),ENSMUSG00000015316(Slamf1),ENSMUSG00000021127(Zfp36l1),ENSMUSG00000024610(Cd74),ENSMUSG00000033470(Cysltr2),ENSMUSG00000034997(Htr2a),ENSMUSG00000035352(Ccl12),ENSMUSG00000038058(Nod1),ENSMUSG00000052087(Rgs14),ENSMUSG00000057135(Scimp),ENSMUSG00000062232(Rapgef2),ENSMUSG00000062960(Kdr)	ENSMUSG00000026883(Dab2ip),ENSMUSG00000038065(Mturn)
BP	GO:0018130	heterocycle biosynthetic process	68	27	95	4028	0.00391715	0.0491355	ENSMUSG00000000247(Lhx2),ENSMUSG00000001156(Mxd1),ENSMUSG00000001552(Jup),ENSMUSG00000002307(Daxx),ENSMUSG00000004040(Stat3),ENSMUSG00000004698(Hdac9),ENSMUSG00000006310(Zbtb32),ENSMUSG00000014773(Dll1),ENSMUSG00000019990(Pde7b),ENSMUSG00000020638(Cmpk2),ENSMUSG00000021367(Edn1),ENSMUSG00000024079(Eif2ak2),ENSMUSG00000024238(Zeb1),ENSMUSG00000024610(Cd74),ENSMUSG00000024805(Pcgf5),ENSMUSG00000025…	ENSMUSG00000009566(Fpgs),ENSMUSG00000020974(Pole2),ENSMUSG00000022474(Pmm1),ENSMUSG00000025764(Jade1),ENSMUSG00000026575(Nme7),ENSMUSG00000026873(Phf19),ENSMUSG00000026883(Dab2ip),ENSMUSG00000030145(Zfp248),ENSMUSG00000031671(Setd6),ENSMUSG00000032456(Nmnat3),ENSMUSG00000034758(Tle6),ENSMUSG00000034800(Zfp661),ENSMUSG00000034957(Cebpa),ENSMUSG00000036867(Smad6),ENSMUSG00000038065(Mturn),ENSMUSG00…
BP	GO:0043405	regulation of MAP kinase activity	12	1	13	302	0.00391964	0.0491355	ENSMUSG00000012519(Mlkl),ENSMUSG00000021367(Edn1),ENSMUSG00000024079(Eif2ak2),ENSMUSG00000024610(Cd74),ENSMUSG00000026360(Rgs2),ENSMUSG00000026981(Il1rn),ENSMUSG00000034765(Dusp5),ENSMUSG00000034997(Htr2a),ENSMUSG00000037944(Ccr7),ENSMUSG00000042901(Aida),ENSMUSG00000045322(Tlr9),ENSMUSG00000052087(Rgs14)	ENSMUSG00000026883(Dab2ip)
CC	GO:0045335	phagocytic vesicle	7	0	7	107	0.00395927	0.0495282	ENSMUSG00000015316(Slamf1),ENSMUSG00000037321(Tap1),ENSMUSG00000038058(Nod1),ENSMUSG00000044583(Tlr7),ENSMUSG00000045322(Tlr9),ENSMUSG00000046879(Irgm1),ENSMUSG00000057135(Scimp)	-
BP	GO:0002643	regulation of tolerance induction	3	0	3	18	0.00403706	0.0501857	ENSMUSG00000022901(Cd86),ENSMUSG00000026770(Il2ra),ENSMUSG00000037944(Ccr7)	-
BP	GO:0034138	toll-like receptor 3 signaling pathway	3	0	3	18	0.00403706	0.0501857	ENSMUSG00000022901(Cd86),ENSMUSG00000031639(Tlr3),ENSMUSG00000057135(Scimp)	-
BP	GO:0070206	protein trimerization	3	0	3	18	0.00403706	0.0501857	ENSMUSG00000012519(Mlkl),ENSMUSG00000020464(Pnpt1),ENSMUSG00000024610(Cd74)	-
BP	GO:0019883	antigen processing and presentation of endogenous antigen	4	0	4	36	0.00408487	0.0506745	ENSMUSG00000035929(H2-Q4),ENSMUSG00000037321(Tap1),ENSMUSG00000053835(H2-T24),ENSMUSG00000056116(H2-T22)	-
BP	GO:0043123	positive regulation of I-kappaB kinase/NF-kappaB signaling	8	0	8	139	0.00410323	0.0507967	ENSMUSG00000024610(Cd74),ENSMUSG00000030921(Trim30a),ENSMUSG00000031639(Tlr3),ENSMUSG00000038058(Nod1),ENSMUSG00000039304(Tnfsf10),ENSMUSG00000045322(Tlr9),ENSMUSG00000057596(Trim30d),ENSMUSG00000078616(Trim30c)	-
BP	GO:0045621	positive regulation of lymphocyte differentiation	7	0	7	110	0.00411403	0.0508248	ENSMUSG00000023206(Il15ra),ENSMUSG00000024610(Cd74),ENSMUSG00000026770(Il2ra),ENSMUSG00000029204(Rhoh),ENSMUSG00000031712(Il15),ENSMUSG00000036594(H2-Aa),ENSMUSG00000037944(Ccr7)	-
BP	GO:0000122	negative regulation of transcription by RNA polymerase II	21	8	29	936	0.00412302	0.0508307	ENSMUSG00000001156(Mxd1),ENSMUSG00000004698(Hdac9),ENSMUSG00000006310(Zbtb32),ENSMUSG00000021367(Edn1),ENSMUSG00000024238(Zeb1),ENSMUSG00000026536(Ifi211),ENSMUSG00000027641(Rbl1),ENSMUSG00000037447(Arid5a),ENSMUSG00000039989(Cbx4),ENSMUSG00000039994(Timeless),ENSMUSG00000041515(Irf8),ENSMUSG00000041649(Klf8),ENSMUSG00000043263(Ifi209),ENSMUSG00000044786(Zfp36),ENSMUSG00000054203(Ifi205),ENSMUSG0…	ENSMUSG00000026873(Phf19),ENSMUSG00000026883(Dab2ip),ENSMUSG00000030145(Zfp248),ENSMUSG00000034758(Tle6),ENSMUSG00000034957(Cebpa),ENSMUSG00000042745(Id1),ENSMUSG00000056501(Cebpb),ENSMUSG00000074519(Zfp971)
BP	GO:0031401	positive regulation of protein modification process	32	4	36	1242	0.00433077	0.0532819	ENSMUSG00000000184(Ccnd2),ENSMUSG00000002307(Daxx),ENSMUSG00000009185(Ccl8),ENSMUSG00000012519(Mlkl),ENSMUSG00000015316(Slamf1),ENSMUSG00000015947(Fcgr1),ENSMUSG00000020717(Pecam1),ENSMUSG00000021367(Edn1),ENSMUSG00000022901(Cd86),ENSMUSG00000024079(Eif2ak2),ENSMUSG00000024397(Aif1),ENSMUSG00000024610(Cd74),ENSMUSG00000026121(Sema4c),ENSMUSG00000026981(Il1rn),ENSMUSG00000027293(Ehd4),ENSMUSG00000…	ENSMUSG00000016984(Etaa1),ENSMUSG00000026873(Phf19),ENSMUSG00000026883(Dab2ip),ENSMUSG00000038065(Mturn)
BP	GO:0006464	cellular protein modification process	72	19	91	3844	0.00436507	0.0534833	ENSMUSG00000000184(Ccnd2),ENSMUSG00000002307(Daxx),ENSMUSG00000004698(Hdac9),ENSMUSG00000009185(Ccl8),ENSMUSG00000012519(Mlkl),ENSMUSG00000014361(Mertk),ENSMUSG00000015316(Slamf1),ENSMUSG00000015947(Fcgr1),ENSMUSG00000020717(Pecam1),ENSMUSG00000021127(Zfp36l1),ENSMUSG00000021367(Edn1),ENSMUSG00000022684(Bfar),ENSMUSG00000022876(Samsn1),ENSMUSG00000022901(Cd86),ENSMUSG00000023307(Marchf5),ENSMUSG0…	ENSMUSG00000016984(Etaa1),ENSMUSG00000022474(Pmm1),ENSMUSG00000025764(Jade1),ENSMUSG00000026785(Pkn3),ENSMUSG00000026873(Phf19),ENSMUSG00000026883(Dab2ip),ENSMUSG00000026975(Dph7),ENSMUSG00000027379(Bub1),ENSMUSG00000031458(Coprs),ENSMUSG00000031671(Setd6),ENSMUSG00000036867(Smad6),ENSMUSG00000038065(Mturn),ENSMUSG00000038074(Fkbp14),ENSMUSG00000040102(Klhl42),ENSMUSG00000042745(Id1),ENSMUSG00000…
BP	GO:0036211	protein modification process	72	19	91	3844	0.00436507	0.0534833	ENSMUSG00000000184(Ccnd2),ENSMUSG00000002307(Daxx),ENSMUSG00000004698(Hdac9),ENSMUSG00000009185(Ccl8),ENSMUSG00000012519(Mlkl),ENSMUSG00000014361(Mertk),ENSMUSG00000015316(Slamf1),ENSMUSG00000015947(Fcgr1),ENSMUSG00000020717(Pecam1),ENSMUSG00000021127(Zfp36l1),ENSMUSG00000021367(Edn1),ENSMUSG00000022684(Bfar),ENSMUSG00000022876(Samsn1),ENSMUSG00000022901(Cd86),ENSMUSG00000023307(Marchf5),ENSMUSG0…	ENSMUSG00000016984(Etaa1),ENSMUSG00000022474(Pmm1),ENSMUSG00000025764(Jade1),ENSMUSG00000026785(Pkn3),ENSMUSG00000026873(Phf19),ENSMUSG00000026883(Dab2ip),ENSMUSG00000026975(Dph7),ENSMUSG00000027379(Bub1),ENSMUSG00000031458(Coprs),ENSMUSG00000031671(Setd6),ENSMUSG00000036867(Smad6),ENSMUSG00000038065(Mturn),ENSMUSG00000038074(Fkbp14),ENSMUSG00000040102(Klhl42),ENSMUSG00000042745(Id1),ENSMUSG00000…
BP	GO:0010508	positive regulation of autophagy	8	0	8	141	0.00447179	0.0546787	ENSMUSG00000030921(Trim30a),ENSMUSG00000038058(Nod1),ENSMUSG00000045322(Tlr9),ENSMUSG00000046879(Irgm1),ENSMUSG00000057596(Trim30d),ENSMUSG00000062960(Kdr),ENSMUSG00000069874(Irgm2),ENSMUSG00000078616(Trim30c)	-
BP	GO:1902107	positive regulation of leukocyte differentiation	9	0	9	172	0.00449474	0.0548469	ENSMUSG00000021127(Zfp36l1),ENSMUSG00000023206(Il15ra),ENSMUSG00000024610(Cd74),ENSMUSG00000026770(Il2ra),ENSMUSG00000029204(Rhoh),ENSMUSG00000031712(Il15),ENSMUSG00000033871(Ppargc1b),ENSMUSG00000036594(H2-Aa),ENSMUSG00000037944(Ccr7)	-
MF	GO:0004331	fructose-2,6-bisphosphate 2-phosphatase activity	1	1	2	6	0.00458789	0.0556421	ENSMUSG00000026773(Pfkfb3)	ENSMUSG00000026409(Pfkfb2)
MF	GO:0019763	immunoglobulin receptor activity	2	0	2	6	0.00458789	0.0556421	ENSMUSG00000015947(Fcgr1),ENSMUSG00000059089(Fcgr4)	-
MF	GO:0019864	IgG binding	2	0	2	6	0.00458789	0.0556421	ENSMUSG00000015947(Fcgr1),ENSMUSG00000059089(Fcgr4)	-
MF	GO:0001965	G-protein alpha-subunit binding	4	0	4	38	0.00464406	0.0562092	ENSMUSG00000026358(Rgs1),ENSMUSG00000026360(Rgs2),ENSMUSG00000034997(Htr2a),ENSMUSG00000052087(Rgs14)	-
BP	GO:0045859	regulation of protein kinase activity	21	3	24	735	0.00466026	0.0562281	ENSMUSG00000000184(Ccnd2),ENSMUSG00000002307(Daxx),ENSMUSG00000012519(Mlkl),ENSMUSG00000015947(Fcgr1),ENSMUSG00000021367(Edn1),ENSMUSG00000022901(Cd86),ENSMUSG00000024079(Eif2ak2),ENSMUSG00000024610(Cd74),ENSMUSG00000026360(Rgs2),ENSMUSG00000026981(Il1rn),ENSMUSG00000031628(Casp3),ENSMUSG00000034765(Dusp5),ENSMUSG00000034997(Htr2a),ENSMUSG00000037944(Ccr7),ENSMUSG00000042901(Aida),ENSMUSG00000045…	ENSMUSG00000016984(Etaa1),ENSMUSG00000026883(Dab2ip),ENSMUSG00000072082(Ccnf)
BP	GO:0042127	regulation of cell population proliferation	38	8	46	1697	0.00466447	0.0562281	ENSMUSG00000000184(Ccnd2),ENSMUSG00000000247(Lhx2),ENSMUSG00000001552(Jup),ENSMUSG00000004040(Stat3),ENSMUSG00000010358(Ifi35),ENSMUSG00000014773(Dll1),ENSMUSG00000015316(Slamf1),ENSMUSG00000018986(Slfn3),ENSMUSG00000020415(Pttg1),ENSMUSG00000021127(Zfp36l1),ENSMUSG00000021367(Edn1),ENSMUSG00000022901(Cd86),ENSMUSG00000024079(Eif2ak2),ENSMUSG00000024238(Zeb1),ENSMUSG00000024397(Aif1),ENSMUSG00000…	ENSMUSG00000023915(Tnfrsf21),ENSMUSG00000026883(Dab2ip),ENSMUSG00000033863(Klf9),ENSMUSG00000034957(Cebpa),ENSMUSG00000036867(Smad6),ENSMUSG00000042745(Id1),ENSMUSG00000056501(Cebpb),ENSMUSG00000069272(H2ac8)
BP	GO:1901700	response to oxygen-containing compound	42	6	48	1789	0.00468407	0.0562976	ENSMUSG00000001552(Jup),ENSMUSG00000004040(Stat3),ENSMUSG00000004698(Hdac9),ENSMUSG00000020464(Pnpt1),ENSMUSG00000020638(Cmpk2),ENSMUSG00000021127(Zfp36l1),ENSMUSG00000021367(Edn1),ENSMUSG00000021423(Ly86),ENSMUSG00000022901(Cd86),ENSMUSG00000024079(Eif2ak2),ENSMUSG00000024238(Zeb1),ENSMUSG00000024397(Aif1),ENSMUSG00000026360(Rgs2),ENSMUSG00000026581(Sell),ENSMUSG00000028270(Gbp2),ENSMUSG00000029…	ENSMUSG00000026409(Pfkfb2),ENSMUSG00000026883(Dab2ip),ENSMUSG00000030322(Mbd4),ENSMUSG00000033863(Klf9),ENSMUSG00000036867(Smad6),ENSMUSG00000056501(Cebpb)
MF	GO:0098772	molecular function regulator	39	9	48	1826	0.0047097	0.0562976	ENSMUSG00000000184(Ccnd2),ENSMUSG00000001768(Rin2),ENSMUSG00000002307(Daxx),ENSMUSG00000009185(Ccl8),ENSMUSG00000015377(Dennd6b),ENSMUSG00000016524(Il19),ENSMUSG00000019979(Apaf1),ENSMUSG00000020415(Pttg1),ENSMUSG00000020709(Adap2),ENSMUSG00000021367(Edn1),ENSMUSG00000022938(Fam3b),ENSMUSG00000023903(Mmp25),ENSMUSG00000026121(Sema4c),ENSMUSG00000026358(Rgs1),ENSMUSG00000026360(Rgs2),ENSMUSG000000…	ENSMUSG00000000983(Wfdc18),ENSMUSG00000001227(Sema6b),ENSMUSG00000016984(Etaa1),ENSMUSG00000026883(Dab2ip),ENSMUSG00000028539(Artn),ENSMUSG00000036867(Smad6),ENSMUSG00000039831(Arhgap29),ENSMUSG00000042745(Id1),ENSMUSG00000072082(Ccnf)
BP	GO:0002755	MyD88-dependent toll-like receptor signaling pathway	3	0	3	19	0.00472966	0.0562976	ENSMUSG00000025498(Irf7),ENSMUSG00000044583(Tlr7),ENSMUSG00000045322(Tlr9)	-
BP	GO:0034155	regulation of toll-like receptor 7 signaling pathway	2	0	2	6	0.00476568	0.0562976	ENSMUSG00000020641(Rsad2),ENSMUSG00000025058(Tasl)	-
BP	GO:0034157	positive regulation of toll-like receptor 7 signaling pathway	2	0	2	6	0.00476568	0.0562976	ENSMUSG00000020641(Rsad2),ENSMUSG00000025058(Tasl)	-
BP	GO:0034354	'de novo' NAD biosynthetic process from tryptophan	2	0	2	6	0.00476568	0.0562976	ENSMUSG00000026866(Kynu),ENSMUSG00000031549(Ido2)	-
BP	GO:0035723	interleukin-15-mediated signaling pathway	2	0	2	6	0.00476568	0.0562976	ENSMUSG00000023206(Il15ra),ENSMUSG00000031712(Il15)	-
BP	GO:0039533	regulation of MDA-5 signaling pathway	2	0	2	6	0.00476568	0.0562976	ENSMUSG00000017830(Dhx58),ENSMUSG00000037921(Ddx60)	-
BP	GO:0071350	cellular response to interleukin-15	2	0	2	6	0.00476568	0.0562976	ENSMUSG00000023206(Il15ra),ENSMUSG00000031712(Il15)	-
MF	GO:0035258	steroid hormone receptor binding	4	2	6	87	0.00476811	0.0562976	ENSMUSG00000002307(Daxx),ENSMUSG00000004040(Stat3),ENSMUSG00000033871(Ppargc1b),ENSMUSG00000037447(Arid5a)	ENSMUSG00000043866(Taf10),ENSMUSG00000056501(Cebpb)
BP	GO:0045661	regulation of myoblast differentiation	5	0	5	60	0.00477402	0.0562976	ENSMUSG00000009185(Ccl8),ENSMUSG00000014773(Dll1),ENSMUSG00000021127(Zfp36l1),ENSMUSG00000029417(Cxcl9),ENSMUSG00000034855(Cxcl10)	-
BP	GO:0000082	G1/S transition of mitotic cell cycle	6	3	9	174	0.00484479	0.0570195	ENSMUSG00000000184(Ccnd2),ENSMUSG00000024397(Aif1),ENSMUSG00000027641(Rbl1),ENSMUSG00000035352(Ccl12),ENSMUSG00000036986(Pml),ENSMUSG00000078763(Slfn1)	ENSMUSG00000025764(Jade1),ENSMUSG00000043866(Taf10),ENSMUSG00000052934(Fbxo31)
BP	GO:0070665	positive regulation of leukocyte proliferation	8	0	8	143	0.00486529	0.0570554	ENSMUSG00000015316(Slamf1),ENSMUSG00000022901(Cd86),ENSMUSG00000024397(Aif1),ENSMUSG00000024610(Cd74),ENSMUSG00000026770(Il2ra),ENSMUSG00000031712(Il15),ENSMUSG00000037944(Ccr7),ENSMUSG00000045322(Tlr9)	-
MF	GO:0042803	protein homodimerization activity	17	5	22	669	0.00486697	0.0570554	ENSMUSG00000004040(Stat3),ENSMUSG00000020717(Pecam1),ENSMUSG00000028268(Gbp3),ENSMUSG00000028270(Gbp2),ENSMUSG00000029366(Dck),ENSMUSG00000030921(Trim30a),ENSMUSG00000034118(Tpst1),ENSMUSG00000034484(Snx2),ENSMUSG00000035299(Mid1),ENSMUSG00000036986(Pml),ENSMUSG00000037321(Tap1),ENSMUSG00000038058(Nod1),ENSMUSG00000045322(Tlr9),ENSMUSG00000048534(Jaml),ENSMUSG00000057596(Trim30d),ENSMUSG000000681…	ENSMUSG00000006442(Srm),ENSMUSG00000026883(Dab2ip),ENSMUSG00000034957(Cebpa),ENSMUSG00000037098(Rab11fip3),ENSMUSG00000056501(Cebpb)
MF	GO:0003676	nucleic acid binding	62	20	82	3487	0.00492829	0.057661	ENSMUSG00000000247(Lhx2),ENSMUSG00000001156(Mxd1),ENSMUSG00000002227(Mov10),ENSMUSG00000004040(Stat3),ENSMUSG00000006310(Zbtb32),ENSMUSG00000017830(Dhx58),ENSMUSG00000020464(Pnpt1),ENSMUSG00000021127(Zfp36l1),ENSMUSG00000024079(Eif2ak2),ENSMUSG00000024238(Zeb1),ENSMUSG00000025498(Irf7),ENSMUSG00000026104(Stat1),ENSMUSG00000026222(Sp100),ENSMUSG00000026535(Ifi202b),ENSMUSG00000026536(Ifi211),ENSMU…	ENSMUSG00000020974(Pole2),ENSMUSG00000026873(Phf19),ENSMUSG00000028933(Xrcc2),ENSMUSG00000030145(Zfp248),ENSMUSG00000030322(Mbd4),ENSMUSG00000032898(Fbxo21),ENSMUSG00000034800(Zfp661),ENSMUSG00000034957(Cebpa),ENSMUSG00000036867(Smad6),ENSMUSG00000038644(Pold1),ENSMUSG00000038797(Zscan2),ENSMUSG00000043866(Taf10),ENSMUSG00000056501(Cebpb),ENSMUSG00000060152(Pop5),ENSMUSG00000069206(Zfp874a),ENSMU…
CC	GO:0036019	endolysosome	2	0	2	6	0.00496481	0.0579746	ENSMUSG00000025058(Tasl),ENSMUSG00000045322(Tlr9)	-
BP	GO:0034654	nucleobase-containing compound biosynthetic process	67	26	93	3963	0.00503857	0.058721	ENSMUSG00000000247(Lhx2),ENSMUSG00000001156(Mxd1),ENSMUSG00000001552(Jup),ENSMUSG00000002307(Daxx),ENSMUSG00000004040(Stat3),ENSMUSG00000004698(Hdac9),ENSMUSG00000006310(Zbtb32),ENSMUSG00000014773(Dll1),ENSMUSG00000019990(Pde7b),ENSMUSG00000020638(Cmpk2),ENSMUSG00000021367(Edn1),ENSMUSG00000024079(Eif2ak2),ENSMUSG00000024238(Zeb1),ENSMUSG00000024610(Cd74),ENSMUSG00000024805(Pcgf5),ENSMUSG00000025…	ENSMUSG00000020974(Pole2),ENSMUSG00000022474(Pmm1),ENSMUSG00000025764(Jade1),ENSMUSG00000026575(Nme7),ENSMUSG00000026873(Phf19),ENSMUSG00000026883(Dab2ip),ENSMUSG00000030145(Zfp248),ENSMUSG00000031671(Setd6),ENSMUSG00000032456(Nmnat3),ENSMUSG00000034758(Tle6),ENSMUSG00000034800(Zfp661),ENSMUSG00000034957(Cebpa),ENSMUSG00000036867(Smad6),ENSMUSG00000038065(Mturn),ENSMUSG00000038644(Pold1),ENSMUSG0…
BP	GO:0043330	response to exogenous dsRNA	5	0	5	61	0.00512393	0.0594834	ENSMUSG00000026896(Ifih1),ENSMUSG00000031639(Tlr3),ENSMUSG00000040296(Ddx58),ENSMUSG00000048806(Ifnb1),ENSMUSG00000079339(Ifit1bl1)	-
BP	GO:0045824	negative regulation of innate immune response	5	0	5	61	0.00512393	0.0594834	ENSMUSG00000017830(Dhx58),ENSMUSG00000026535(Ifi202b),ENSMUSG00000027639(Samhd1),ENSMUSG00000037321(Tap1),ENSMUSG00000074151(Nlrc5)	-
BP	GO:0045765	regulation of angiogenesis	11	2	13	312	0.005136	0.0595078	ENSMUSG00000001552(Jup),ENSMUSG00000004040(Stat3),ENSMUSG00000004698(Hdac9),ENSMUSG00000014773(Dll1),ENSMUSG00000026222(Sp100),ENSMUSG00000030671(Pde3b),ENSMUSG00000031639(Tlr3),ENSMUSG00000033470(Cysltr2),ENSMUSG00000034855(Cxcl10),ENSMUSG00000036986(Pml),ENSMUSG00000062960(Kdr)	ENSMUSG00000026883(Dab2ip),ENSMUSG00000042745(Id1)
BP	GO:0031331	positive regulation of cellular catabolic process	14	1	15	386	0.0052264	0.0604379	ENSMUSG00000002227(Mov10),ENSMUSG00000020464(Pnpt1),ENSMUSG00000021127(Zfp36l1),ENSMUSG00000030560(Ctsc),ENSMUSG00000030921(Trim30a),ENSMUSG00000034997(Htr2a),ENSMUSG00000038058(Nod1),ENSMUSG00000044786(Zfp36),ENSMUSG00000045322(Tlr9),ENSMUSG00000046879(Irgm1),ENSMUSG00000057596(Trim30d),ENSMUSG00000062960(Kdr),ENSMUSG00000069874(Irgm2),ENSMUSG00000078616(Trim30c)	ENSMUSG00000026883(Dab2ip)
BP	GO:0051384	response to glucocorticoid	8	1	9	177	0.00540918	0.0624305	ENSMUSG00000021127(Zfp36l1),ENSMUSG00000021367(Edn1),ENSMUSG00000024397(Aif1),ENSMUSG00000026981(Il1rn),ENSMUSG00000031628(Casp3),ENSMUSG00000033871(Ppargc1b),ENSMUSG00000044786(Zfp36),ENSMUSG00000048806(Ifnb1)	ENSMUSG00000033863(Klf9)
BP	GO:0002685	regulation of leukocyte migration	10	0	10	210	0.00545967	0.0628234	ENSMUSG00000015316(Slamf1),ENSMUSG00000020717(Pecam1),ENSMUSG00000021367(Edn1),ENSMUSG00000024397(Aif1),ENSMUSG00000024610(Cd74),ENSMUSG00000026581(Sell),ENSMUSG00000029204(Rhoh),ENSMUSG00000034855(Cxcl10),ENSMUSG00000035352(Ccl12),ENSMUSG00000037944(Ccr7)	-
BP	GO:0009074	aromatic amino acid family catabolic process	3	0	3	20	0.00548967	0.0628234	ENSMUSG00000026866(Kynu),ENSMUSG00000027360(Hdc),ENSMUSG00000031549(Ido2)	-
BP	GO:0019359	nicotinamide nucleotide biosynthetic process	2	1	3	20	0.00548967	0.0628234	ENSMUSG00000026866(Kynu),ENSMUSG00000031549(Ido2)	ENSMUSG00000032456(Nmnat3)
BP	GO:0019363	pyridine nucleotide biosynthetic process	2	1	3	20	0.00548967	0.0628234	ENSMUSG00000026866(Kynu),ENSMUSG00000031549(Ido2)	ENSMUSG00000032456(Nmnat3)
BP	GO:0051153	regulation of striated muscle cell differentiation	7	0	7	116	0.00549587	0.0628234	ENSMUSG00000009185(Ccl8),ENSMUSG00000014773(Dll1),ENSMUSG00000021367(Edn1),ENSMUSG00000026360(Rgs2),ENSMUSG00000029417(Cxcl9),ENSMUSG00000030409(Dmpk),ENSMUSG00000034855(Cxcl10)	-
BP	GO:0032642	regulation of chemokine production	6	0	6	88	0.00553516	0.0631516	ENSMUSG00000024079(Eif2ak2),ENSMUSG00000024397(Aif1),ENSMUSG00000024610(Cd74),ENSMUSG00000031639(Tlr3),ENSMUSG00000044583(Tlr7),ENSMUSG00000045322(Tlr9)	-
BP	GO:0071902	positive regulation of protein serine/threonine kinase activity	11	2	13	315	0.0055547	0.0632536	ENSMUSG00000000184(Ccnd2),ENSMUSG00000012519(Mlkl),ENSMUSG00000021367(Edn1),ENSMUSG00000024079(Eif2ak2),ENSMUSG00000024610(Cd74),ENSMUSG00000026981(Il1rn),ENSMUSG00000034997(Htr2a),ENSMUSG00000037944(Ccr7),ENSMUSG00000045322(Tlr9),ENSMUSG00000062232(Rapgef2),ENSMUSG00000069874(Irgm2)	ENSMUSG00000016984(Etaa1),ENSMUSG00000026883(Dab2ip)
BP	GO:0009892	negative regulation of metabolic process	64	12	76	3141	0.00569867	0.0647695	ENSMUSG00000000247(Lhx2),ENSMUSG00000001156(Mxd1),ENSMUSG00000002227(Mov10),ENSMUSG00000002307(Daxx),ENSMUSG00000004040(Stat3),ENSMUSG00000004698(Hdac9),ENSMUSG00000006310(Zbtb32),ENSMUSG00000014361(Mertk),ENSMUSG00000014773(Dll1),ENSMUSG00000015316(Slamf1),ENSMUSG00000017830(Dhx58),ENSMUSG00000020415(Pttg1),ENSMUSG00000020464(Pnpt1),ENSMUSG00000020717(Pecam1),ENSMUSG00000021127(Zfp36l1),ENSMUSG0…	ENSMUSG00000000983(Wfdc18),ENSMUSG00000023915(Tnfrsf21),ENSMUSG00000026873(Phf19),ENSMUSG00000026883(Dab2ip),ENSMUSG00000030145(Zfp248),ENSMUSG00000034758(Tle6),ENSMUSG00000034957(Cebpa),ENSMUSG00000036867(Smad6),ENSMUSG00000042745(Id1),ENSMUSG00000056501(Cebpb),ENSMUSG00000069272(H2ac8),ENSMUSG00000074519(Zfp971)
BP	GO:0045597	positive regulation of cell differentiation	25	7	32	1089	0.00576434	0.0653912	ENSMUSG00000001768(Rin2),ENSMUSG00000004040(Stat3),ENSMUSG00000009185(Ccl8),ENSMUSG00000021127(Zfp36l1),ENSMUSG00000021367(Edn1),ENSMUSG00000023206(Il15ra),ENSMUSG00000024238(Zeb1),ENSMUSG00000024610(Cd74),ENSMUSG00000026360(Rgs2),ENSMUSG00000026770(Il2ra),ENSMUSG00000029204(Rhoh),ENSMUSG00000029417(Cxcl9),ENSMUSG00000031292(Cdkl5),ENSMUSG00000031712(Il15),ENSMUSG00000033871(Ppargc1b),ENSMUSG0000…	ENSMUSG00000026883(Dab2ip),ENSMUSG00000028933(Xrcc2),ENSMUSG00000034758(Tle6),ENSMUSG00000034957(Cebpa),ENSMUSG00000038065(Mturn),ENSMUSG00000052934(Fbxo31),ENSMUSG00000056501(Cebpb)
BP	GO:0050900	leukocyte migration	13	1	14	354	0.00590529	0.0668631	ENSMUSG00000009185(Ccl8),ENSMUSG00000015316(Slamf1),ENSMUSG00000020717(Pecam1),ENSMUSG00000021367(Edn1),ENSMUSG00000024397(Aif1),ENSMUSG00000024610(Cd74),ENSMUSG00000026581(Sell),ENSMUSG00000029204(Rhoh),ENSMUSG00000029417(Cxcl9),ENSMUSG00000034855(Cxcl10),ENSMUSG00000035352(Ccl12),ENSMUSG00000037944(Ccr7),ENSMUSG00000048534(Jaml)	ENSMUSG00000028539(Artn)
BP	GO:0051247	positive regulation of protein metabolic process	41	4	45	1674	0.00594264	0.0671586	ENSMUSG00000000184(Ccnd2),ENSMUSG00000002307(Daxx),ENSMUSG00000004040(Stat3),ENSMUSG00000009185(Ccl8),ENSMUSG00000012519(Mlkl),ENSMUSG00000015316(Slamf1),ENSMUSG00000015947(Fcgr1),ENSMUSG00000019979(Apaf1),ENSMUSG00000020717(Pecam1),ENSMUSG00000021367(Edn1),ENSMUSG00000022901(Cd86),ENSMUSG00000023903(Mmp25),ENSMUSG00000024079(Eif2ak2),ENSMUSG00000024397(Aif1),ENSMUSG00000024610(Cd74),ENSMUSG00000…	ENSMUSG00000016984(Etaa1),ENSMUSG00000026873(Phf19),ENSMUSG00000026883(Dab2ip),ENSMUSG00000038065(Mturn)
CC	GO:0001726	ruffle	9	0	9	176	0.00596047	0.0672328	ENSMUSG00000015222(Map2),ENSMUSG00000020717(Pecam1),ENSMUSG00000022876(Samsn1),ENSMUSG00000024397(Aif1),ENSMUSG00000030064(Frmd4b),ENSMUSG00000031292(Cdkl5),ENSMUSG00000036995(Asap3),ENSMUSG00000040296(Ddx58),ENSMUSG00000057135(Scimp)	-
BP	GO:0070372	regulation of ERK1 and ERK2 cascade	11	2	13	318	0.00600029	0.0675543	ENSMUSG00000009185(Ccl8),ENSMUSG00000015316(Slamf1),ENSMUSG00000024610(Cd74),ENSMUSG00000033470(Cysltr2),ENSMUSG00000034997(Htr2a),ENSMUSG00000035352(Ccl12),ENSMUSG00000038058(Nod1),ENSMUSG00000052087(Rgs14),ENSMUSG00000057135(Scimp),ENSMUSG00000062232(Rapgef2),ENSMUSG00000062960(Kdr)	ENSMUSG00000026883(Dab2ip),ENSMUSG00000038065(Mturn)
BP	GO:0043065	positive regulation of apoptotic process	20	1	21	629	0.00618113	0.0694592	ENSMUSG00000002104(Rapsn),ENSMUSG00000016524(Il19),ENSMUSG00000019979(Apaf1),ENSMUSG00000024079(Eif2ak2),ENSMUSG00000027514(Zbp1),ENSMUSG00000030149(Klrk1),ENSMUSG00000030560(Ctsc),ENSMUSG00000031628(Casp3),ENSMUSG00000031639(Tlr3),ENSMUSG00000035352(Ccl12),ENSMUSG00000035683(Melk),ENSMUSG00000036986(Pml),ENSMUSG00000038058(Nod1),ENSMUSG00000039304(Tnfsf10),ENSMUSG00000045932(Ifit2),ENSMUSG000000…	ENSMUSG00000026883(Dab2ip)
BP	GO:0033674	positive regulation of kinase activity	16	3	19	549	0.00622944	0.0698705	ENSMUSG00000000184(Ccnd2),ENSMUSG00000002307(Daxx),ENSMUSG00000012519(Mlkl),ENSMUSG00000014361(Mertk),ENSMUSG00000015947(Fcgr1),ENSMUSG00000021367(Edn1),ENSMUSG00000022901(Cd86),ENSMUSG00000024079(Eif2ak2),ENSMUSG00000024610(Cd74),ENSMUSG00000026981(Il1rn),ENSMUSG00000034997(Htr2a),ENSMUSG00000037944(Ccr7),ENSMUSG00000045322(Tlr9),ENSMUSG00000062232(Rapgef2),ENSMUSG00000069874(Irgm2),ENSMUSG00000…	ENSMUSG00000016984(Etaa1),ENSMUSG00000026409(Pfkfb2),ENSMUSG00000026883(Dab2ip)
BP	GO:0016064	immunoglobulin mediated immune response	7	0	7	119	0.0063048	0.0703963	ENSMUSG00000015947(Fcgr1),ENSMUSG00000024610(Cd74),ENSMUSG00000025498(Irf7),ENSMUSG00000036887(C1qa),ENSMUSG00000036905(C1qb),ENSMUSG00000073418(C4b),ENSMUSG00000073421(H2-Ab1)	-
BP	GO:0060333	interferon-gamma-mediated signaling pathway	3	0	3	21	0.0063188	0.0703963	ENSMUSG00000046879(Irgm1),ENSMUSG00000069874(Irgm2),ENSMUSG00000074151(Nlrc5)	-
BP	GO:2001224	positive regulation of neuron migration	1	2	3	21	0.0063188	0.0703963	ENSMUSG00000062232(Rapgef2)	ENSMUSG00000026883(Dab2ip),ENSMUSG00000052934(Fbxo31)
MF	GO:0001730	2'-5'-oligoadenylate synthetase activity	2	0	2	7	0.00634711	0.0703963	ENSMUSG00000032661(Oas3),ENSMUSG00000066861(Oas1g)	-
MF	GO:0052739	phosphatidylserine 1-acylhydrolase activity	2	0	2	7	0.00634711	0.0703963	ENSMUSG00000053846(Lipg),ENSMUSG00000060675(Plaat3)	-
MF	GO:0052740	1-acyl-2-lysophosphatidylserine acylhydrolase activity	2	0	2	7	0.00634711	0.0703963	ENSMUSG00000053846(Lipg),ENSMUSG00000060675(Plaat3)	-
MF	GO:0035257	nuclear hormone receptor binding	5	3	8	153	0.00647071	0.0712404	ENSMUSG00000001552(Jup),ENSMUSG00000002307(Daxx),ENSMUSG00000004040(Stat3),ENSMUSG00000033871(Ppargc1b),ENSMUSG00000037447(Arid5a)	ENSMUSG00000030852(Tacc2),ENSMUSG00000043866(Taf10),ENSMUSG00000056501(Cebpb)
BP	GO:0032602	chemokine production	6	0	6	91	0.00650617	0.0712404	ENSMUSG00000024079(Eif2ak2),ENSMUSG00000024397(Aif1),ENSMUSG00000024610(Cd74),ENSMUSG00000031639(Tlr3),ENSMUSG00000044583(Tlr7),ENSMUSG00000045322(Tlr9)	-
BP	GO:2000106	regulation of leukocyte apoptotic process	6	0	6	91	0.00650617	0.0712404	ENSMUSG00000014361(Mertk),ENSMUSG00000024610(Cd74),ENSMUSG00000037944(Ccr7),ENSMUSG00000062007(Hsh2d),ENSMUSG00000062232(Rapgef2),ENSMUSG00000079227(Ccr5)	-
BP	GO:0046006	regulation of activated T cell proliferation	4	0	4	41	0.00653878	0.0712404	ENSMUSG00000015316(Slamf1),ENSMUSG00000022901(Cd86),ENSMUSG00000026770(Il2ra),ENSMUSG00000031628(Casp3)	-
BP	GO:0006003	fructose 2,6-bisphosphate metabolic process	1	1	2	7	0.00659152	0.0712404	ENSMUSG00000026773(Pfkfb3)	ENSMUSG00000026409(Pfkfb2)
BP	GO:0034627	'de novo' NAD biosynthetic process	2	0	2	7	0.00659152	0.0712404	ENSMUSG00000026866(Kynu),ENSMUSG00000031549(Ido2)	-
BP	GO:0035744	T-helper 1 cell cytokine production	2	0	2	7	0.00659152	0.0712404	ENSMUSG00000015316(Slamf1),ENSMUSG00000037447(Arid5a)	-
BP	GO:0045341	MHC class I biosynthetic process	2	0	2	7	0.00659152	0.0712404	ENSMUSG00000036986(Pml),ENSMUSG00000074151(Nlrc5)	-
BP	GO:0045343	regulation of MHC class I biosynthetic process	2	0	2	7	0.00659152	0.0712404	ENSMUSG00000036986(Pml),ENSMUSG00000074151(Nlrc5)	-
BP	GO:0090673	endothelial cell-matrix adhesion	2	0	2	7	0.00659152	0.0712404	ENSMUSG00000001768(Rin2),ENSMUSG00000020717(Pecam1)	-
BP	GO:0097021	lymphocyte migration into lymphoid organs	1	1	2	7	0.00659152	0.0712404	ENSMUSG00000037944(Ccr7)	ENSMUSG00000028539(Artn)
BP	GO:0097283	keratinocyte apoptotic process	2	0	2	7	0.00659152	0.0712404	ENSMUSG00000021127(Zfp36l1),ENSMUSG00000044786(Zfp36)	-
BP	GO:1901098	positive regulation of autophagosome maturation	2	0	2	7	0.00659152	0.0712404	ENSMUSG00000046879(Irgm1),ENSMUSG00000069874(Irgm2)	-
BP	GO:1902172	regulation of keratinocyte apoptotic process	2	0	2	7	0.00659152	0.0712404	ENSMUSG00000021127(Zfp36l1),ENSMUSG00000044786(Zfp36)	-
BP	GO:0001568	blood vessel development	19	4	23	715	0.0066023	0.0712404	ENSMUSG00000001552(Jup),ENSMUSG00000001768(Rin2),ENSMUSG00000004040(Stat3),ENSMUSG00000004698(Hdac9),ENSMUSG00000014773(Dll1),ENSMUSG00000020717(Pecam1),ENSMUSG00000021127(Zfp36l1),ENSMUSG00000021367(Edn1),ENSMUSG00000026222(Sp100),ENSMUSG00000030671(Pde3b),ENSMUSG00000031639(Tlr3),ENSMUSG00000033470(Cysltr2),ENSMUSG00000034640(Tiparp),ENSMUSG00000034855(Cxcl10),ENSMUSG00000035352(Ccl12),ENSMUSG0…	ENSMUSG00000004105(Angptl2),ENSMUSG00000026883(Dab2ip),ENSMUSG00000036867(Smad6),ENSMUSG00000042745(Id1)
MF	GO:0003823	antigen binding	4	0	4	42	0.00665877	0.07172	ENSMUSG00000035929(H2-Q4),ENSMUSG00000036594(H2-Aa),ENSMUSG00000037321(Tap1),ENSMUSG00000073421(H2-Ab1)	-
BP	GO:0006355	regulation of transcription, DNA-templated	60	21	81	3408	0.00672988	0.0723291	ENSMUSG00000000247(Lhx2),ENSMUSG00000001156(Mxd1),ENSMUSG00000001552(Jup),ENSMUSG00000002307(Daxx),ENSMUSG00000004040(Stat3),ENSMUSG00000004698(Hdac9),ENSMUSG00000006310(Zbtb32),ENSMUSG00000014773(Dll1),ENSMUSG00000021367(Edn1),ENSMUSG00000024079(Eif2ak2),ENSMUSG00000024238(Zeb1),ENSMUSG00000024610(Cd74),ENSMUSG00000024805(Pcgf5),ENSMUSG00000025498(Irf7),ENSMUSG00000026104(Stat1),ENSMUSG000000262…	ENSMUSG00000025764(Jade1),ENSMUSG00000026873(Phf19),ENSMUSG00000026883(Dab2ip),ENSMUSG00000030145(Zfp248),ENSMUSG00000031671(Setd6),ENSMUSG00000034758(Tle6),ENSMUSG00000034800(Zfp661),ENSMUSG00000034957(Cebpa),ENSMUSG00000036867(Smad6),ENSMUSG00000038065(Mturn),ENSMUSG00000038797(Zscan2),ENSMUSG00000042745(Id1),ENSMUSG00000043866(Taf10),ENSMUSG00000046658(Zfp316),ENSMUSG00000056501(Cebpb),ENSMUSG…
BP	GO:0043068	positive regulation of programmed cell death	20	1	21	634	0.00673956	0.0723291	ENSMUSG00000002104(Rapsn),ENSMUSG00000016524(Il19),ENSMUSG00000019979(Apaf1),ENSMUSG00000024079(Eif2ak2),ENSMUSG00000027514(Zbp1),ENSMUSG00000030149(Klrk1),ENSMUSG00000030560(Ctsc),ENSMUSG00000031628(Casp3),ENSMUSG00000031639(Tlr3),ENSMUSG00000035352(Ccl12),ENSMUSG00000035683(Melk),ENSMUSG00000036986(Pml),ENSMUSG00000038058(Nod1),ENSMUSG00000039304(Tnfsf10),ENSMUSG00000045932(Ifit2),ENSMUSG000000…	ENSMUSG00000026883(Dab2ip)
BP	GO:1903506	regulation of nucleic acid-templated transcription	60	21	81	3409	0.00678005	0.072633	ENSMUSG00000000247(Lhx2),ENSMUSG00000001156(Mxd1),ENSMUSG00000001552(Jup),ENSMUSG00000002307(Daxx),ENSMUSG00000004040(Stat3),ENSMUSG00000004698(Hdac9),ENSMUSG00000006310(Zbtb32),ENSMUSG00000014773(Dll1),ENSMUSG00000021367(Edn1),ENSMUSG00000024079(Eif2ak2),ENSMUSG00000024238(Zeb1),ENSMUSG00000024610(Cd74),ENSMUSG00000024805(Pcgf5),ENSMUSG00000025498(Irf7),ENSMUSG00000026104(Stat1),ENSMUSG000000262…	ENSMUSG00000025764(Jade1),ENSMUSG00000026873(Phf19),ENSMUSG00000026883(Dab2ip),ENSMUSG00000030145(Zfp248),ENSMUSG00000031671(Setd6),ENSMUSG00000034758(Tle6),ENSMUSG00000034800(Zfp661),ENSMUSG00000034957(Cebpa),ENSMUSG00000036867(Smad6),ENSMUSG00000038065(Mturn),ENSMUSG00000038797(Zscan2),ENSMUSG00000042745(Id1),ENSMUSG00000043866(Taf10),ENSMUSG00000046658(Zfp316),ENSMUSG00000056501(Cebpb),ENSMUSG…
BP	GO:0040017	positive regulation of locomotion	16	4	20	594	0.00681027	0.072826	ENSMUSG00000001768(Rin2),ENSMUSG00000004040(Stat3),ENSMUSG00000004698(Hdac9),ENSMUSG00000015316(Slamf1),ENSMUSG00000020717(Pecam1),ENSMUSG00000021367(Edn1),ENSMUSG00000024397(Aif1),ENSMUSG00000024610(Cd74),ENSMUSG00000026121(Sema4c),ENSMUSG00000026581(Sell),ENSMUSG00000034855(Cxcl10),ENSMUSG00000035352(Ccl12),ENSMUSG00000037944(Ccr7),ENSMUSG00000062232(Rapgef2),ENSMUSG00000062960(Kdr),ENSMUSG0000…	ENSMUSG00000001227(Sema6b),ENSMUSG00000026883(Dab2ip),ENSMUSG00000028539(Artn),ENSMUSG00000052934(Fbxo31)
BP	GO:0030335	positive regulation of cell migration	16	3	19	554	0.0068363	0.0729041	ENSMUSG00000001768(Rin2),ENSMUSG00000004040(Stat3),ENSMUSG00000004698(Hdac9),ENSMUSG00000015316(Slamf1),ENSMUSG00000020717(Pecam1),ENSMUSG00000021367(Edn1),ENSMUSG00000024397(Aif1),ENSMUSG00000024610(Cd74),ENSMUSG00000026121(Sema4c),ENSMUSG00000026581(Sell),ENSMUSG00000034855(Cxcl10),ENSMUSG00000035352(Ccl12),ENSMUSG00000037944(Ccr7),ENSMUSG00000062232(Rapgef2),ENSMUSG00000062960(Kdr),ENSMUSG0000…	ENSMUSG00000001227(Sema6b),ENSMUSG00000026883(Dab2ip),ENSMUSG00000052934(Fbxo31)
MF	GO:0038187	pattern recognition receptor activity	3	0	3	22	0.00684201	0.0729041	ENSMUSG00000038058(Nod1),ENSMUSG00000044583(Tlr7),ENSMUSG00000045322(Tlr9)	-
BP	GO:0010646	regulation of cell communication	68	10	78	3264	0.00691332	0.0734493	ENSMUSG00000002104(Rapsn),ENSMUSG00000004040(Stat3),ENSMUSG00000009185(Ccl8),ENSMUSG00000010358(Ifi35),ENSMUSG00000012519(Mlkl),ENSMUSG00000014773(Dll1),ENSMUSG00000015316(Slamf1),ENSMUSG00000016524(Il19),ENSMUSG00000017314(Mpp2),ENSMUSG00000017830(Dhx58),ENSMUSG00000019979(Apaf1),ENSMUSG00000020641(Rsad2),ENSMUSG00000020717(Pecam1),ENSMUSG00000021367(Edn1),ENSMUSG00000021423(Ly86),ENSMUSG0000002…	ENSMUSG00000022494(Shisa9),ENSMUSG00000024186(Rgs11),ENSMUSG00000025764(Jade1),ENSMUSG00000026409(Pfkfb2),ENSMUSG00000026883(Dab2ip),ENSMUSG00000034758(Tle6),ENSMUSG00000036867(Smad6),ENSMUSG00000037098(Rab11fip3),ENSMUSG00000038065(Mturn),ENSMUSG00000042745(Id1)
BP	GO:0019219	regulation of nucleobase-containing compound metabolic process	70	21	91	3908	0.00692133	0.0734493	ENSMUSG00000000247(Lhx2),ENSMUSG00000001156(Mxd1),ENSMUSG00000001552(Jup),ENSMUSG00000002227(Mov10),ENSMUSG00000002307(Daxx),ENSMUSG00000004040(Stat3),ENSMUSG00000004698(Hdac9),ENSMUSG00000006310(Zbtb32),ENSMUSG00000014773(Dll1),ENSMUSG00000019979(Apaf1),ENSMUSG00000020464(Pnpt1),ENSMUSG00000021127(Zfp36l1),ENSMUSG00000021367(Edn1),ENSMUSG00000024079(Eif2ak2),ENSMUSG00000024238(Zeb1),ENSMUSG00000…	ENSMUSG00000025764(Jade1),ENSMUSG00000026873(Phf19),ENSMUSG00000026883(Dab2ip),ENSMUSG00000030145(Zfp248),ENSMUSG00000031671(Setd6),ENSMUSG00000034758(Tle6),ENSMUSG00000034800(Zfp661),ENSMUSG00000034957(Cebpa),ENSMUSG00000036867(Smad6),ENSMUSG00000038065(Mturn),ENSMUSG00000038797(Zscan2),ENSMUSG00000042745(Id1),ENSMUSG00000043866(Taf10),ENSMUSG00000046658(Zfp316),ENSMUSG00000056501(Cebpb),ENSMUSG…
MF	GO:0004896	cytokine receptor activity	6	0	6	94	0.00693011	0.0734493	ENSMUSG00000023206(Il15ra),ENSMUSG00000024610(Cd74),ENSMUSG00000026770(Il2ra),ENSMUSG00000030745(Il21r),ENSMUSG00000037944(Ccr7),ENSMUSG00000079227(Ccr5)	-
BP	GO:2001141	regulation of RNA biosynthetic process	60	21	81	3413	0.00698396	0.0738888	ENSMUSG00000000247(Lhx2),ENSMUSG00000001156(Mxd1),ENSMUSG00000001552(Jup),ENSMUSG00000002307(Daxx),ENSMUSG00000004040(Stat3),ENSMUSG00000004698(Hdac9),ENSMUSG00000006310(Zbtb32),ENSMUSG00000014773(Dll1),ENSMUSG00000021367(Edn1),ENSMUSG00000024079(Eif2ak2),ENSMUSG00000024238(Zeb1),ENSMUSG00000024610(Cd74),ENSMUSG00000024805(Pcgf5),ENSMUSG00000025498(Irf7),ENSMUSG00000026104(Stat1),ENSMUSG000000262…	ENSMUSG00000025764(Jade1),ENSMUSG00000026873(Phf19),ENSMUSG00000026883(Dab2ip),ENSMUSG00000030145(Zfp248),ENSMUSG00000031671(Setd6),ENSMUSG00000034758(Tle6),ENSMUSG00000034800(Zfp661),ENSMUSG00000034957(Cebpa),ENSMUSG00000036867(Smad6),ENSMUSG00000038065(Mturn),ENSMUSG00000038797(Zscan2),ENSMUSG00000042745(Id1),ENSMUSG00000043866(Taf10),ENSMUSG00000046658(Zfp316),ENSMUSG00000056501(Cebpb),ENSMUSG…
BP	GO:0034612	response to tumor necrosis factor	6	4	10	218	0.00704554	0.0744084	ENSMUSG00000009185(Ccl8),ENSMUSG00000021127(Zfp36l1),ENSMUSG00000021367(Edn1),ENSMUSG00000035352(Ccl12),ENSMUSG00000037860(Aim2),ENSMUSG00000044786(Zfp36)	ENSMUSG00000023915(Tnfrsf21),ENSMUSG00000026883(Dab2ip),ENSMUSG00000032456(Nmnat3),ENSMUSG00000034957(Cebpa)
MF	GO:0019901	protein kinase binding	20	3	23	734	0.00710949	0.0749511	ENSMUSG00000000184(Ccnd2),ENSMUSG00000001552(Jup),ENSMUSG00000002307(Daxx),ENSMUSG00000004040(Stat3),ENSMUSG00000004698(Hdac9),ENSMUSG00000012519(Mlkl),ENSMUSG00000015222(Map2),ENSMUSG00000023206(Il15ra),ENSMUSG00000029204(Rhoh),ENSMUSG00000030921(Trim30a),ENSMUSG00000034765(Dusp5),ENSMUSG00000044786(Zfp36),ENSMUSG00000052087(Rgs14),ENSMUSG00000057596(Trim30d),ENSMUSG00000062232(Rapgef2),ENSMUSG0…	ENSMUSG00000026409(Pfkfb2),ENSMUSG00000026883(Dab2ip),ENSMUSG00000028539(Artn)
BP	GO:0006959	humoral immune response	9	2	11	253	0.00713329	0.0750694	ENSMUSG00000001128(Cfp),ENSMUSG00000029417(Cxcl9),ENSMUSG00000034855(Cxcl10),ENSMUSG00000036887(C1qa),ENSMUSG00000036905(C1qb),ENSMUSG00000037944(Ccr7),ENSMUSG00000048806(Ifnb1),ENSMUSG00000073418(C4b),ENSMUSG00000073421(H2-Ab1)	ENSMUSG00000000983(Wfdc18),ENSMUSG00000023915(Tnfrsf21)
BP	GO:0070059	intrinsic apoptotic signaling pathway in response to endoplasmic reticulum stress	3	2	5	66	0.00714937	0.0751061	ENSMUSG00000019979(Apaf1),ENSMUSG00000031628(Casp3),ENSMUSG00000036986(Pml)	ENSMUSG00000026883(Dab2ip),ENSMUSG00000056501(Cebpb)
BP	GO:0002827	positive regulation of T-helper 1 type immune response	3	0	3	22	0.00721856	0.0754356	ENSMUSG00000037447(Arid5a),ENSMUSG00000037944(Ccr7),ENSMUSG00000073421(H2-Ab1)	-
BP	GO:1901739	regulation of myoblast fusion	3	0	3	22	0.00721856	0.0754356	ENSMUSG00000009185(Ccl8),ENSMUSG00000029417(Cxcl9),ENSMUSG00000034855(Cxcl10)	-
BP	GO:0030101	natural killer cell activation	6	0	6	93	0.00721865	0.0754356	ENSMUSG00000014361(Mertk),ENSMUSG00000015316(Slamf1),ENSMUSG00000023206(Il15ra),ENSMUSG00000030149(Klrk1),ENSMUSG00000031712(Il15),ENSMUSG00000048806(Ifnb1)	-
BP	GO:0045637	regulation of myeloid cell differentiation	8	2	10	219	0.0072665	0.0758028	ENSMUSG00000004040(Stat3),ENSMUSG00000014773(Dll1),ENSMUSG00000021127(Zfp36l1),ENSMUSG00000024610(Cd74),ENSMUSG00000033871(Ppargc1b),ENSMUSG00000035692(Isg15),ENSMUSG00000044786(Zfp36),ENSMUSG00000048806(Ifnb1)	ENSMUSG00000038065(Mturn),ENSMUSG00000056501(Cebpb)
BP	GO:0051272	positive regulation of cellular component movement	17	3	20	598	0.00730824	0.0761052	ENSMUSG00000001768(Rin2),ENSMUSG00000004040(Stat3),ENSMUSG00000004698(Hdac9),ENSMUSG00000015222(Map2),ENSMUSG00000015316(Slamf1),ENSMUSG00000020717(Pecam1),ENSMUSG00000021367(Edn1),ENSMUSG00000024397(Aif1),ENSMUSG00000024610(Cd74),ENSMUSG00000026121(Sema4c),ENSMUSG00000026581(Sell),ENSMUSG00000034855(Cxcl10),ENSMUSG00000035352(Ccl12),ENSMUSG00000037944(Ccr7),ENSMUSG00000062232(Rapgef2),ENSMUSG000…	ENSMUSG00000001227(Sema6b),ENSMUSG00000026883(Dab2ip),ENSMUSG00000052934(Fbxo31)
BP	GO:0035295	tube development	27	5	32	1108	0.00736367	0.0765489	ENSMUSG00000000247(Lhx2),ENSMUSG00000001552(Jup),ENSMUSG00000001768(Rin2),ENSMUSG00000004040(Stat3),ENSMUSG00000004698(Hdac9),ENSMUSG00000014773(Dll1),ENSMUSG00000019979(Apaf1),ENSMUSG00000020717(Pecam1),ENSMUSG00000021127(Zfp36l1),ENSMUSG00000021367(Edn1),ENSMUSG00000024238(Zeb1),ENSMUSG00000026121(Sema4c),ENSMUSG00000026222(Sp100),ENSMUSG00000030671(Pde3b),ENSMUSG00000031628(Casp3),ENSMUSG00000…	ENSMUSG00000004105(Angptl2),ENSMUSG00000026883(Dab2ip),ENSMUSG00000034957(Cebpa),ENSMUSG00000036867(Smad6),ENSMUSG00000042745(Id1)
BP	GO:0052126	movement in host environment	7	0	7	123	0.00751738	0.0780107	ENSMUSG00000006411(Nectin4),ENSMUSG00000024610(Cd74),ENSMUSG00000025492(Ifitm3),ENSMUSG00000030921(Trim30a),ENSMUSG00000036986(Pml),ENSMUSG00000057596(Trim30d),ENSMUSG00000078616(Trim30c)	-
CC	GO:0005654	nucleoplasm	65	21	86	3593	0.00757301	0.0784517	ENSMUSG00000000184(Ccnd2),ENSMUSG00000000247(Lhx2),ENSMUSG00000001156(Mxd1),ENSMUSG00000002307(Daxx),ENSMUSG00000004040(Stat3),ENSMUSG00000004698(Hdac9),ENSMUSG00000006310(Zbtb32),ENSMUSG00000020638(Cmpk2),ENSMUSG00000024238(Zeb1),ENSMUSG00000024805(Pcgf5),ENSMUSG00000025498(Irf7),ENSMUSG00000026222(Sp100),ENSMUSG00000026536(Ifi211),ENSMUSG00000026773(Pfkfb3),ENSMUSG00000027018(Hat1),ENSMUSG00000…	ENSMUSG00000016984(Etaa1),ENSMUSG00000020974(Pole2),ENSMUSG00000024056(Ndc80),ENSMUSG00000025764(Jade1),ENSMUSG00000026409(Pfkfb2),ENSMUSG00000026873(Phf19),ENSMUSG00000027379(Bub1),ENSMUSG00000028621(Cyb5rl),ENSMUSG00000028933(Xrcc2),ENSMUSG00000030852(Tacc2),ENSMUSG00000031458(Coprs),ENSMUSG00000031671(Setd6),ENSMUSG00000033863(Klf9),ENSMUSG00000034957(Cebpa),ENSMUSG00000036867(Smad6),ENSMUSG00…
BP	GO:1901362	organic cyclic compound biosynthetic process	69	27	96	4172	0.0075928	0.0784556	ENSMUSG00000000247(Lhx2),ENSMUSG00000001156(Mxd1),ENSMUSG00000001552(Jup),ENSMUSG00000002307(Daxx),ENSMUSG00000004040(Stat3),ENSMUSG00000004698(Hdac9),ENSMUSG00000006310(Zbtb32),ENSMUSG00000014773(Dll1),ENSMUSG00000019990(Pde7b),ENSMUSG00000020638(Cmpk2),ENSMUSG00000021367(Edn1),ENSMUSG00000024079(Eif2ak2),ENSMUSG00000024238(Zeb1),ENSMUSG00000024610(Cd74),ENSMUSG00000024805(Pcgf5),ENSMUSG00000025…	ENSMUSG00000009566(Fpgs),ENSMUSG00000020974(Pole2),ENSMUSG00000022474(Pmm1),ENSMUSG00000025764(Jade1),ENSMUSG00000026575(Nme7),ENSMUSG00000026873(Phf19),ENSMUSG00000026883(Dab2ip),ENSMUSG00000030145(Zfp248),ENSMUSG00000031671(Setd6),ENSMUSG00000032456(Nmnat3),ENSMUSG00000034758(Tle6),ENSMUSG00000034800(Zfp661),ENSMUSG00000034957(Cebpa),ENSMUSG00000036867(Smad6),ENSMUSG00000038065(Mturn),ENSMUSG00…
BP	GO:0043331	response to dsRNA	5	0	5	67	0.00761284	0.0784556	ENSMUSG00000026896(Ifih1),ENSMUSG00000031639(Tlr3),ENSMUSG00000040296(Ddx58),ENSMUSG00000048806(Ifnb1),ENSMUSG00000079339(Ifit1bl1)	-
BP	GO:0045600	positive regulation of fat cell differentiation	3	2	5	67	0.00761284	0.0784556	ENSMUSG00000021127(Zfp36l1),ENSMUSG00000034997(Htr2a),ENSMUSG00000044786(Zfp36)	ENSMUSG00000034957(Cebpa),ENSMUSG00000056501(Cebpb)
BP	GO:0023051	regulation of signaling	68	10	78	3279	0.00773511	0.0795374	ENSMUSG00000002104(Rapsn),ENSMUSG00000004040(Stat3),ENSMUSG00000009185(Ccl8),ENSMUSG00000010358(Ifi35),ENSMUSG00000012519(Mlkl),ENSMUSG00000014773(Dll1),ENSMUSG00000015316(Slamf1),ENSMUSG00000016524(Il19),ENSMUSG00000017314(Mpp2),ENSMUSG00000017830(Dhx58),ENSMUSG00000019979(Apaf1),ENSMUSG00000020641(Rsad2),ENSMUSG00000020717(Pecam1),ENSMUSG00000021367(Edn1),ENSMUSG00000021423(Ly86),ENSMUSG0000002…	ENSMUSG00000022494(Shisa9),ENSMUSG00000024186(Rgs11),ENSMUSG00000025764(Jade1),ENSMUSG00000026409(Pfkfb2),ENSMUSG00000026883(Dab2ip),ENSMUSG00000034758(Tle6),ENSMUSG00000036867(Smad6),ENSMUSG00000037098(Rab11fip3),ENSMUSG00000038065(Mturn),ENSMUSG00000042745(Id1)
BP	GO:0045005	DNA-dependent DNA replication maintenance of fidelity	2	2	4	43	0.00774446	0.0795374	ENSMUSG00000027639(Samhd1),ENSMUSG00000039994(Timeless)	ENSMUSG00000016984(Etaa1),ENSMUSG00000038644(Pold1)
MF	GO:0003824	catalytic activity	102	23	125	5775	0.00780858	0.0799043	ENSMUSG00000002227(Mov10),ENSMUSG00000003617(Cp),ENSMUSG00000004698(Hdac9),ENSMUSG00000005237(Dnah2),ENSMUSG00000012519(Mlkl),ENSMUSG00000014361(Mertk),ENSMUSG00000017830(Dhx58),ENSMUSG00000019990(Pde7b),ENSMUSG00000020464(Pnpt1),ENSMUSG00000020638(Cmpk2),ENSMUSG00000020641(Rsad2),ENSMUSG00000021263(Degs2),ENSMUSG00000021364(Elovl2),ENSMUSG00000022684(Bfar),ENSMUSG00000023307(Marchf5),ENSMUSG0000…	ENSMUSG00000002769(Gnmt),ENSMUSG00000006442(Srm),ENSMUSG00000009566(Fpgs),ENSMUSG00000022474(Pmm1),ENSMUSG00000022621(Rabl2),ENSMUSG00000026409(Pfkfb2),ENSMUSG00000026575(Nme7),ENSMUSG00000026694(Eef1aknmt),ENSMUSG00000026785(Pkn3),ENSMUSG00000026975(Dph7),ENSMUSG00000027379(Bub1),ENSMUSG00000027999(Pla2g12a),ENSMUSG00000028621(Cyb5rl),ENSMUSG00000028933(Xrcc2),ENSMUSG00000030322(Mbd4),ENSMUSG000…
BP	GO:0002822	regulation of adaptive immune response based on somatic recombination of immune receptors built from immunoglobulin superfamily domains	8	0	8	155	0.00781059	0.0799043	ENSMUSG00000015316(Slamf1),ENSMUSG00000015947(Fcgr1),ENSMUSG00000020641(Rsad2),ENSMUSG00000037447(Arid5a),ENSMUSG00000037944(Ccr7),ENSMUSG00000044701(Il27),ENSMUSG00000048806(Ifnb1),ENSMUSG00000073421(H2-Ab1)	-
BP	GO:0043547	positive regulation of GTPase activity	12	2	14	366	0.00782036	0.0799043	ENSMUSG00000001768(Rin2),ENSMUSG00000009185(Ccl8),ENSMUSG00000020709(Adap2),ENSMUSG00000021886(Gpr65),ENSMUSG00000026358(Rgs1),ENSMUSG00000026360(Rgs2),ENSMUSG00000031292(Cdkl5),ENSMUSG00000035352(Ccl12),ENSMUSG00000036995(Asap3),ENSMUSG00000037944(Ccr7),ENSMUSG00000052087(Rgs14),ENSMUSG00000062232(Rapgef2)	ENSMUSG00000026883(Dab2ip),ENSMUSG00000039831(Arhgap29)
BP	GO:0019724	B cell mediated immunity	7	0	7	124	0.00784572	0.0800264	ENSMUSG00000015947(Fcgr1),ENSMUSG00000024610(Cd74),ENSMUSG00000025498(Irf7),ENSMUSG00000036887(C1qa),ENSMUSG00000036905(C1qb),ENSMUSG00000073418(C4b),ENSMUSG00000073421(H2-Ab1)	-
BP	GO:0051094	positive regulation of developmental process	34	7	41	1518	0.00790988	0.0805431	ENSMUSG00000001552(Jup),ENSMUSG00000001768(Rin2),ENSMUSG00000004040(Stat3),ENSMUSG00000004698(Hdac9),ENSMUSG00000009185(Ccl8),ENSMUSG00000014773(Dll1),ENSMUSG00000021127(Zfp36l1),ENSMUSG00000021367(Edn1),ENSMUSG00000023206(Il15ra),ENSMUSG00000023307(Marchf5),ENSMUSG00000024238(Zeb1),ENSMUSG00000024610(Cd74),ENSMUSG00000026360(Rgs2),ENSMUSG00000026770(Il2ra),ENSMUSG00000029204(Rhoh),ENSMUSG0000002…	ENSMUSG00000026883(Dab2ip),ENSMUSG00000028933(Xrcc2),ENSMUSG00000034758(Tle6),ENSMUSG00000034957(Cebpa),ENSMUSG00000038065(Mturn),ENSMUSG00000052934(Fbxo31),ENSMUSG00000056501(Cebpb)
BP	GO:0051147	regulation of muscle cell differentiation	8	0	8	156	0.00810572	0.0823966	ENSMUSG00000009185(Ccl8),ENSMUSG00000014773(Dll1),ENSMUSG00000021367(Edn1),ENSMUSG00000024238(Zeb1),ENSMUSG00000026360(Rgs2),ENSMUSG00000029417(Cxcl9),ENSMUSG00000030409(Dmpk),ENSMUSG00000034855(Cxcl10)	-
BP	GO:0045860	positive regulation of protein kinase activity	15	2	17	484	0.0081795	0.082974	ENSMUSG00000000184(Ccnd2),ENSMUSG00000002307(Daxx),ENSMUSG00000012519(Mlkl),ENSMUSG00000015947(Fcgr1),ENSMUSG00000021367(Edn1),ENSMUSG00000022901(Cd86),ENSMUSG00000024079(Eif2ak2),ENSMUSG00000024610(Cd74),ENSMUSG00000026981(Il1rn),ENSMUSG00000034997(Htr2a),ENSMUSG00000037944(Ccr7),ENSMUSG00000045322(Tlr9),ENSMUSG00000062232(Rapgef2),ENSMUSG00000069874(Irgm2),ENSMUSG00000074570(Cass4)	ENSMUSG00000016984(Etaa1),ENSMUSG00000026883(Dab2ip)
BP	GO:0072525	pyridine-containing compound biosynthetic process	2	1	3	23	0.00819033	0.082974	ENSMUSG00000026866(Kynu),ENSMUSG00000031549(Ido2)	ENSMUSG00000032456(Nmnat3)
MF	GO:0008443	phosphofructokinase activity	1	1	2	8	0.00836291	0.0844309	ENSMUSG00000026773(Pfkfb3)	ENSMUSG00000026409(Pfkfb2)
BP	GO:0001525	angiogenesis	15	3	18	525	0.00837552	0.0844309	ENSMUSG00000001552(Jup),ENSMUSG00000004040(Stat3),ENSMUSG00000004698(Hdac9),ENSMUSG00000014773(Dll1),ENSMUSG00000020717(Pecam1),ENSMUSG00000021367(Edn1),ENSMUSG00000026222(Sp100),ENSMUSG00000030671(Pde3b),ENSMUSG00000031639(Tlr3),ENSMUSG00000033470(Cysltr2),ENSMUSG00000034855(Cxcl10),ENSMUSG00000035352(Ccl12),ENSMUSG00000036986(Pml),ENSMUSG00000062960(Kdr),ENSMUSG00000070327(Rnf213)	ENSMUSG00000004105(Angptl2),ENSMUSG00000026883(Dab2ip),ENSMUSG00000042745(Id1)
BP	GO:0010771	negative regulation of cell morphogenesis involved in differentiation	4	2	6	96	0.00839074	0.0844309	ENSMUSG00000015222(Map2),ENSMUSG00000026121(Sema4c),ENSMUSG00000062232(Rapgef2),ENSMUSG00000079227(Ccr5)	ENSMUSG00000001227(Sema6b),ENSMUSG00000042745(Id1)
BP	GO:0042102	positive regulation of T cell proliferation	6	0	6	96	0.00839074	0.0844309	ENSMUSG00000015316(Slamf1),ENSMUSG00000022901(Cd86),ENSMUSG00000024397(Aif1),ENSMUSG00000026770(Il2ra),ENSMUSG00000031712(Il15),ENSMUSG00000037944(Ccr7)	-
BP	GO:1901990	regulation of mitotic cell cycle phase transition	7	4	11	259	0.00843193	0.0845706	ENSMUSG00000000184(Ccnd2),ENSMUSG00000021127(Zfp36l1),ENSMUSG00000024397(Aif1),ENSMUSG00000027641(Rbl1),ENSMUSG00000035352(Ccl12),ENSMUSG00000036986(Pml),ENSMUSG00000078763(Slfn1)	ENSMUSG00000024056(Ndc80),ENSMUSG00000025764(Jade1),ENSMUSG00000027379(Bub1),ENSMUSG00000052934(Fbxo31)
MF	GO:0003724	RNA helicase activity	5	0	5	70	0.00843297	0.0845706	ENSMUSG00000002227(Mov10),ENSMUSG00000017830(Dhx58),ENSMUSG00000026896(Ifih1),ENSMUSG00000034329(Brip1),ENSMUSG00000040296(Ddx58)	-
MF	GO:0008009	chemokine activity	4	0	4	45	0.00850024	0.0849359	ENSMUSG00000009185(Ccl8),ENSMUSG00000029417(Cxcl9),ENSMUSG00000034855(Cxcl10),ENSMUSG00000035352(Ccl12)	-
BP	GO:0043407	negative regulation of MAP kinase activity	4	1	5	69	0.00860173	0.0849359	ENSMUSG00000026360(Rgs2),ENSMUSG00000034765(Dusp5),ENSMUSG00000042901(Aida),ENSMUSG00000052087(Rgs14)	ENSMUSG00000026883(Dab2ip)
BP	GO:0002732	positive regulation of dendritic cell cytokine production	2	0	2	8	0.00868291	0.0849359	ENSMUSG00000040296(Ddx58),ENSMUSG00000057135(Scimp)	-
BP	GO:0002885	positive regulation of hypersensitivity	2	0	2	8	0.00868291	0.0849359	ENSMUSG00000015947(Fcgr1),ENSMUSG00000037944(Ccr7)	-
BP	GO:0006569	tryptophan catabolic process	2	0	2	8	0.00868291	0.0849359	ENSMUSG00000026866(Kynu),ENSMUSG00000031549(Ido2)	-
BP	GO:0034165	positive regulation of toll-like receptor 9 signaling pathway	2	0	2	8	0.00868291	0.0849359	ENSMUSG00000020641(Rsad2),ENSMUSG00000045322(Tlr9)	-
BP	GO:0035696	monocyte extravasation	2	0	2	8	0.00868291	0.0849359	ENSMUSG00000020717(Pecam1),ENSMUSG00000048534(Jaml)	-
BP	GO:0042436	indole-containing compound catabolic process	2	0	2	8	0.00868291	0.0849359	ENSMUSG00000026866(Kynu),ENSMUSG00000031549(Ido2)	-
BP	GO:0042590	antigen processing and presentation of exogenous peptide antigen via MHC class I	2	0	2	8	0.00868291	0.0849359	ENSMUSG00000015947(Fcgr1),ENSMUSG00000037321(Tap1)	-
BP	GO:0046218	indolalkylamine catabolic process	2	0	2	8	0.00868291	0.0849359	ENSMUSG00000026866(Kynu),ENSMUSG00000031549(Ido2)	-
BP	GO:0070672	response to interleukin-15	2	0	2	8	0.00868291	0.0849359	ENSMUSG00000023206(Il15ra),ENSMUSG00000031712(Il15)	-
BP	GO:0075044	positive regulation by symbiont of host autophagy	2	0	2	8	0.00868291	0.0849359	ENSMUSG00000046879(Irgm1),ENSMUSG00000069874(Irgm2)	-
BP	GO:0075071	modulation by symbiont of host autophagy	2	0	2	8	0.00868291	0.0849359	ENSMUSG00000046879(Irgm1),ENSMUSG00000069874(Irgm2)	-
BP	GO:0098883	synapse pruning	2	0	2	8	0.00868291	0.0849359	ENSMUSG00000036887(C1qa),ENSMUSG00000036905(C1qb)	-
BP	GO:2000510	positive regulation of dendritic cell chemotaxis	2	0	2	8	0.00868291	0.0849359	ENSMUSG00000015316(Slamf1),ENSMUSG00000037944(Ccr7)	-
MF	GO:0102567	phospholipase A2 activity (consuming 1,2-dipalmitoylphosphatidylcholine)	2	1	3	24	0.0087581	0.0853915	ENSMUSG00000033847(Pla2g4c),ENSMUSG00000060675(Plaat3)	ENSMUSG00000027999(Pla2g12a)
MF	GO:0102568	phospholipase A2 activity consuming 1,2-dioleoylphosphatidylethanolamine)	2	1	3	24	0.0087581	0.0853915	ENSMUSG00000033847(Pla2g4c),ENSMUSG00000060675(Plaat3)	ENSMUSG00000027999(Pla2g12a)
BP	GO:0044093	positive regulation of molecular function	40	4	44	1667	0.00887563	0.0863963	ENSMUSG00000000184(Ccnd2),ENSMUSG00000001552(Jup),ENSMUSG00000001768(Rin2),ENSMUSG00000002307(Daxx),ENSMUSG00000004040(Stat3),ENSMUSG00000009185(Ccl8),ENSMUSG00000012519(Mlkl),ENSMUSG00000014361(Mertk),ENSMUSG00000015947(Fcgr1),ENSMUSG00000019979(Apaf1),ENSMUSG00000020709(Adap2),ENSMUSG00000021367(Edn1),ENSMUSG00000021886(Gpr65),ENSMUSG00000022901(Cd86),ENSMUSG00000023903(Mmp25),ENSMUSG0000002407…	ENSMUSG00000016984(Etaa1),ENSMUSG00000026409(Pfkfb2),ENSMUSG00000026883(Dab2ip),ENSMUSG00000039831(Arhgap29)
BP	GO:0017148	negative regulation of translation	7	0	7	127	0.00889432	0.0864372	ENSMUSG00000002227(Mov10),ENSMUSG00000004040(Stat3),ENSMUSG00000021127(Zfp36l1),ENSMUSG00000024079(Eif2ak2),ENSMUSG00000026360(Rgs2),ENSMUSG00000036986(Pml),ENSMUSG00000044786(Zfp36)	-
BP	GO:1903707	negative regulation of hemopoiesis	8	0	8	159	0.00904141	0.0877238	ENSMUSG00000014773(Dll1),ENSMUSG00000021127(Zfp36l1),ENSMUSG00000023367(Tmem176a),ENSMUSG00000024610(Cd74),ENSMUSG00000029810(Tmem176b),ENSMUSG00000039899(Fgl2),ENSMUSG00000044786(Zfp36),ENSMUSG00000048806(Ifnb1)	-
BP	GO:0002455	humoral immune response mediated by circulating immunoglobulin	4	0	4	45	0.0090877	0.0880297	ENSMUSG00000036887(C1qa),ENSMUSG00000036905(C1qb),ENSMUSG00000073418(C4b),ENSMUSG00000073421(H2-Ab1)	-
BP	GO:0039529	RIG-I signaling pathway	3	0	3	24	0.00923531	0.0888254	ENSMUSG00000017830(Dhx58),ENSMUSG00000037921(Ddx60),ENSMUSG00000040296(Ddx58)	-
BP	GO:0051767	nitric-oxide synthase biosynthetic process	3	0	3	24	0.00923531	0.0888254	ENSMUSG00000021367(Edn1),ENSMUSG00000045322(Tlr9),ENSMUSG00000062960(Kdr)	-
BP	GO:0051769	regulation of nitric-oxide synthase biosynthetic process	3	0	3	24	0.00923531	0.0888254	ENSMUSG00000021367(Edn1),ENSMUSG00000045322(Tlr9),ENSMUSG00000062960(Kdr)	-
BP	GO:0070498	interleukin-1-mediated signaling pathway	3	0	3	24	0.00923531	0.0888254	ENSMUSG00000026981(Il1rn),ENSMUSG00000027514(Zbp1),ENSMUSG00000064090(Vrk2)	-
BP	GO:0046718	viral entry into host cell	6	0	6	98	0.00924427	0.0888254	ENSMUSG00000006411(Nectin4),ENSMUSG00000024610(Cd74),ENSMUSG00000025492(Ifitm3),ENSMUSG00000030921(Trim30a),ENSMUSG00000057596(Trim30d),ENSMUSG00000078616(Trim30c)	-
BP	GO:0009896	positive regulation of catabolic process	15	1	16	451	0.00926678	0.0888985	ENSMUSG00000002227(Mov10),ENSMUSG00000020464(Pnpt1),ENSMUSG00000021127(Zfp36l1),ENSMUSG00000030560(Ctsc),ENSMUSG00000030921(Trim30a),ENSMUSG00000034640(Tiparp),ENSMUSG00000034997(Htr2a),ENSMUSG00000038058(Nod1),ENSMUSG00000044786(Zfp36),ENSMUSG00000045322(Tlr9),ENSMUSG00000046879(Irgm1),ENSMUSG00000057596(Trim30d),ENSMUSG00000062960(Kdr),ENSMUSG00000069874(Irgm2),ENSMUSG00000078616(Trim30c)	ENSMUSG00000026883(Dab2ip)
BP	GO:0071356	cellular response to tumor necrosis factor	6	3	9	193	0.00932529	0.0893162	ENSMUSG00000009185(Ccl8),ENSMUSG00000021127(Zfp36l1),ENSMUSG00000021367(Edn1),ENSMUSG00000035352(Ccl12),ENSMUSG00000037860(Aim2),ENSMUSG00000044786(Zfp36)	ENSMUSG00000023915(Tnfrsf21),ENSMUSG00000026883(Dab2ip),ENSMUSG00000034957(Cebpa)
BP	GO:0044271	cellular nitrogen compound biosynthetic process	76	29	105	4661	0.00945197	0.0902818	ENSMUSG00000000247(Lhx2),ENSMUSG00000001156(Mxd1),ENSMUSG00000001552(Jup),ENSMUSG00000002227(Mov10),ENSMUSG00000002307(Daxx),ENSMUSG00000004040(Stat3),ENSMUSG00000004698(Hdac9),ENSMUSG00000006310(Zbtb32),ENSMUSG00000014773(Dll1),ENSMUSG00000019990(Pde7b),ENSMUSG00000020638(Cmpk2),ENSMUSG00000021127(Zfp36l1),ENSMUSG00000021263(Degs2),ENSMUSG00000021367(Edn1),ENSMUSG00000024079(Eif2ak2),ENSMUSG0000…	ENSMUSG00000006442(Srm),ENSMUSG00000009566(Fpgs),ENSMUSG00000020974(Pole2),ENSMUSG00000022474(Pmm1),ENSMUSG00000025764(Jade1),ENSMUSG00000026575(Nme7),ENSMUSG00000026873(Phf19),ENSMUSG00000026883(Dab2ip),ENSMUSG00000026975(Dph7),ENSMUSG00000030145(Zfp248),ENSMUSG00000031671(Setd6),ENSMUSG00000032456(Nmnat3),ENSMUSG00000034758(Tle6),ENSMUSG00000034800(Zfp661),ENSMUSG00000034957(Cebpa),ENSMUSG00000…
CC	GO:0043231	intracellular membrane-bounded organelle	177	46	223	10693	0.00947127	0.0902818	ENSMUSG00000000184(Ccnd2),ENSMUSG00000000247(Lhx2),ENSMUSG00000001156(Mxd1),ENSMUSG00000001552(Jup),ENSMUSG00000002104(Rapsn),ENSMUSG00000002227(Mov10),ENSMUSG00000002307(Daxx),ENSMUSG00000004040(Stat3),ENSMUSG00000004698(Hdac9),ENSMUSG00000006310(Zbtb32),ENSMUSG00000010358(Ifi35),ENSMUSG00000012519(Mlkl),ENSMUSG00000014773(Dll1),ENSMUSG00000015222(Map2),ENSMUSG00000019082(Slc25a22),ENSMUSG000000…	ENSMUSG00000009566(Fpgs),ENSMUSG00000016984(Etaa1),ENSMUSG00000019158(Tmem160),ENSMUSG00000020974(Pole2),ENSMUSG00000024056(Ndc80),ENSMUSG00000025732(Mcrip2),ENSMUSG00000025764(Jade1),ENSMUSG00000025931(Paqr8),ENSMUSG00000026409(Pfkfb2),ENSMUSG00000026785(Pkn3),ENSMUSG00000026873(Phf19),ENSMUSG00000027379(Bub1),ENSMUSG00000027999(Pla2g12a),ENSMUSG00000028621(Cyb5rl),ENSMUSG00000028933(Xrcc2),ENSM…
MF	GO:0042379	chemokine receptor binding	5	0	5	72	0.00947149	0.0902818	ENSMUSG00000004040(Stat3),ENSMUSG00000009185(Ccl8),ENSMUSG00000029417(Cxcl9),ENSMUSG00000034855(Cxcl10),ENSMUSG00000035352(Ccl12)	-
BP	GO:0042113	B cell activation	9	2	11	264	0.00964824	0.0918198	ENSMUSG00000014773(Dll1),ENSMUSG00000021127(Zfp36l1),ENSMUSG00000022876(Samsn1),ENSMUSG00000022901(Cd86),ENSMUSG00000024610(Cd74),ENSMUSG00000031628(Casp3),ENSMUSG00000045322(Tlr9),ENSMUSG00000048806(Ifnb1),ENSMUSG00000073421(H2-Ab1)	ENSMUSG00000023915(Tnfrsf21),ENSMUSG00000046006(Gapt)
BP	GO:1901699	cellular response to nitrogen compound	21	1	22	698	0.00975344	0.0926732	ENSMUSG00000001552(Jup),ENSMUSG00000002307(Daxx),ENSMUSG00000004040(Stat3),ENSMUSG00000004698(Hdac9),ENSMUSG00000021127(Zfp36l1),ENSMUSG00000021367(Edn1),ENSMUSG00000024238(Zeb1),ENSMUSG00000024397(Aif1),ENSMUSG00000026896(Ifih1),ENSMUSG00000031628(Casp3),ENSMUSG00000031639(Tlr3),ENSMUSG00000034329(Brip1),ENSMUSG00000034997(Htr2a),ENSMUSG00000038058(Nod1),ENSMUSG00000039994(Timeless),ENSMUSG00000…	ENSMUSG00000056501(Cebpb)
BP	GO:0009889	regulation of biosynthetic process	71	23	94	4110	0.00981141	0.0928817	ENSMUSG00000000247(Lhx2),ENSMUSG00000001156(Mxd1),ENSMUSG00000001552(Jup),ENSMUSG00000002227(Mov10),ENSMUSG00000002307(Daxx),ENSMUSG00000004040(Stat3),ENSMUSG00000004698(Hdac9),ENSMUSG00000006310(Zbtb32),ENSMUSG00000014773(Dll1),ENSMUSG00000021127(Zfp36l1),ENSMUSG00000021367(Edn1),ENSMUSG00000024079(Eif2ak2),ENSMUSG00000024238(Zeb1),ENSMUSG00000024397(Aif1),ENSMUSG00000024610(Cd74),ENSMUSG0000002…	ENSMUSG00000002769(Gnmt),ENSMUSG00000025764(Jade1),ENSMUSG00000026873(Phf19),ENSMUSG00000026883(Dab2ip),ENSMUSG00000026975(Dph7),ENSMUSG00000030145(Zfp248),ENSMUSG00000031671(Setd6),ENSMUSG00000034758(Tle6),ENSMUSG00000034800(Zfp661),ENSMUSG00000034957(Cebpa),ENSMUSG00000036867(Smad6),ENSMUSG00000038065(Mturn),ENSMUSG00000038797(Zscan2),ENSMUSG00000042745(Id1),ENSMUSG00000043866(Taf10),ENSMUSG000…
BP	GO:0030517	negative regulation of axon extension	3	1	4	46	0.00981272	0.0928817	ENSMUSG00000015222(Map2),ENSMUSG00000026121(Sema4c),ENSMUSG00000079227(Ccr5)	ENSMUSG00000001227(Sema6b)
MF	GO:0019957	C-C chemokine binding	3	0	3	25	0.00982209	0.0928817	ENSMUSG00000037944(Ccr7),ENSMUSG00000044786(Zfp36),ENSMUSG00000079227(Ccr5)	-
MF	GO:0032813	tumor necrosis factor receptor superfamily binding	3	1	4	47	0.0098961	0.0934336	ENSMUSG00000031628(Casp3),ENSMUSG00000039304(Tnfsf10),ENSMUSG00000050395(Tnfsf15)	ENSMUSG00000026883(Dab2ip)
BP	GO:0051173	positive regulation of nitrogen compound metabolic process	64	11	75	3167	0.0100579	0.0948108	ENSMUSG00000000184(Ccnd2),ENSMUSG00000000247(Lhx2),ENSMUSG00000001552(Jup),ENSMUSG00000002227(Mov10),ENSMUSG00000002307(Daxx),ENSMUSG00000004040(Stat3),ENSMUSG00000009185(Ccl8),ENSMUSG00000012519(Mlkl),ENSMUSG00000014773(Dll1),ENSMUSG00000015316(Slamf1),ENSMUSG00000015947(Fcgr1),ENSMUSG00000019979(Apaf1),ENSMUSG00000020464(Pnpt1),ENSMUSG00000020717(Pecam1),ENSMUSG00000021127(Zfp36l1),ENSMUSG00000…	ENSMUSG00000016984(Etaa1),ENSMUSG00000025764(Jade1),ENSMUSG00000026873(Phf19),ENSMUSG00000026883(Dab2ip),ENSMUSG00000034957(Cebpa),ENSMUSG00000036867(Smad6),ENSMUSG00000038065(Mturn),ENSMUSG00000038797(Zscan2),ENSMUSG00000056501(Cebpb),ENSMUSG00000071064(Zfp827),ENSMUSG00000078870(Gm14410)
BP	GO:0031325	positive regulation of cellular metabolic process	67	12	79	3367	0.0102372	0.0961795	ENSMUSG00000000184(Ccnd2),ENSMUSG00000000247(Lhx2),ENSMUSG00000001552(Jup),ENSMUSG00000002227(Mov10),ENSMUSG00000002307(Daxx),ENSMUSG00000004040(Stat3),ENSMUSG00000009185(Ccl8),ENSMUSG00000012519(Mlkl),ENSMUSG00000014361(Mertk),ENSMUSG00000014773(Dll1),ENSMUSG00000015316(Slamf1),ENSMUSG00000015947(Fcgr1),ENSMUSG00000019979(Apaf1),ENSMUSG00000020464(Pnpt1),ENSMUSG00000020717(Pecam1),ENSMUSG0000002…	ENSMUSG00000016984(Etaa1),ENSMUSG00000025764(Jade1),ENSMUSG00000026409(Pfkfb2),ENSMUSG00000026873(Phf19),ENSMUSG00000026883(Dab2ip),ENSMUSG00000034957(Cebpa),ENSMUSG00000036867(Smad6),ENSMUSG00000038065(Mturn),ENSMUSG00000038797(Zscan2),ENSMUSG00000056501(Cebpb),ENSMUSG00000071064(Zfp827),ENSMUSG00000078870(Gm14410)
BP	GO:0071385	cellular response to glucocorticoid stimulus	4	1	5	72	0.0102463	0.0961795	ENSMUSG00000021127(Zfp36l1),ENSMUSG00000021367(Edn1),ENSMUSG00000044786(Zfp36),ENSMUSG00000048806(Ifnb1)	ENSMUSG00000033863(Klf9)
BP	GO:0044843	cell cycle G1/S phase transition	6	3	9	196	0.0102514	0.0961795	ENSMUSG00000000184(Ccnd2),ENSMUSG00000024397(Aif1),ENSMUSG00000027641(Rbl1),ENSMUSG00000035352(Ccl12),ENSMUSG00000036986(Pml),ENSMUSG00000078763(Slfn1)	ENSMUSG00000025764(Jade1),ENSMUSG00000043866(Taf10),ENSMUSG00000052934(Fbxo31)
BP	GO:2000147	positive regulation of cell motility	16	3	19	577	0.0102786	0.0962832	ENSMUSG00000001768(Rin2),ENSMUSG00000004040(Stat3),ENSMUSG00000004698(Hdac9),ENSMUSG00000015316(Slamf1),ENSMUSG00000020717(Pecam1),ENSMUSG00000021367(Edn1),ENSMUSG00000024397(Aif1),ENSMUSG00000024610(Cd74),ENSMUSG00000026121(Sema4c),ENSMUSG00000026581(Sell),ENSMUSG00000034855(Cxcl10),ENSMUSG00000035352(Ccl12),ENSMUSG00000037944(Ccr7),ENSMUSG00000062232(Rapgef2),ENSMUSG00000062960(Kdr),ENSMUSG0000…	ENSMUSG00000001227(Sema6b),ENSMUSG00000026883(Dab2ip),ENSMUSG00000052934(Fbxo31)
BP	GO:1901623	regulation of lymphocyte chemotaxis	3	0	3	25	0.0103546	0.096843	ENSMUSG00000034855(Cxcl10),ENSMUSG00000035352(Ccl12),ENSMUSG00000037944(Ccr7)	-
BP	GO:0001944	vasculature development	19	4	23	745	0.010501	0.0979054	ENSMUSG00000001552(Jup),ENSMUSG00000001768(Rin2),ENSMUSG00000004040(Stat3),ENSMUSG00000004698(Hdac9),ENSMUSG00000014773(Dll1),ENSMUSG00000020717(Pecam1),ENSMUSG00000021127(Zfp36l1),ENSMUSG00000021367(Edn1),ENSMUSG00000026222(Sp100),ENSMUSG00000030671(Pde3b),ENSMUSG00000031639(Tlr3),ENSMUSG00000033470(Cysltr2),ENSMUSG00000034640(Tiparp),ENSMUSG00000034855(Cxcl10),ENSMUSG00000035352(Ccl12),ENSMUSG0…	ENSMUSG00000004105(Angptl2),ENSMUSG00000026883(Dab2ip),ENSMUSG00000036867(Smad6),ENSMUSG00000042745(Id1)
BP	GO:0072358	cardiovascular system development	19	4	23	745	0.010501	0.0979054	ENSMUSG00000001552(Jup),ENSMUSG00000001768(Rin2),ENSMUSG00000004040(Stat3),ENSMUSG00000004698(Hdac9),ENSMUSG00000014773(Dll1),ENSMUSG00000020717(Pecam1),ENSMUSG00000021127(Zfp36l1),ENSMUSG00000021367(Edn1),ENSMUSG00000026222(Sp100),ENSMUSG00000030671(Pde3b),ENSMUSG00000031639(Tlr3),ENSMUSG00000033470(Cysltr2),ENSMUSG00000034640(Tiparp),ENSMUSG00000034855(Cxcl10),ENSMUSG00000035352(Ccl12),ENSMUSG0…	ENSMUSG00000004105(Angptl2),ENSMUSG00000026883(Dab2ip),ENSMUSG00000036867(Smad6),ENSMUSG00000042745(Id1)
BP	GO:0006576	cellular biogenic amine metabolic process	3	1	4	47	0.0105743	0.0979829	ENSMUSG00000026866(Kynu),ENSMUSG00000027360(Hdc),ENSMUSG00000031549(Ido2)	ENSMUSG00000006442(Srm)
BP	GO:0050798	activated T cell proliferation	4	0	4	47	0.0105743	0.0979829	ENSMUSG00000015316(Slamf1),ENSMUSG00000022901(Cd86),ENSMUSG00000026770(Il2ra),ENSMUSG00000031628(Casp3)	-
BP	GO:0061014	positive regulation of mRNA catabolic process	4	0	4	47	0.0105743	0.0979829	ENSMUSG00000002227(Mov10),ENSMUSG00000020464(Pnpt1),ENSMUSG00000021127(Zfp36l1),ENSMUSG00000044786(Zfp36)	-
BP	GO:0031960	response to corticosteroid	8	1	9	197	0.010575	0.0979829	ENSMUSG00000021127(Zfp36l1),ENSMUSG00000021367(Edn1),ENSMUSG00000024397(Aif1),ENSMUSG00000026981(Il1rn),ENSMUSG00000031628(Casp3),ENSMUSG00000033871(Ppargc1b),ENSMUSG00000044786(Zfp36),ENSMUSG00000048806(Ifnb1)	ENSMUSG00000033863(Klf9)
MF	GO:0008047	enzyme activator activity	13	3	16	467	0.0106061	0.0979951	ENSMUSG00000001768(Rin2),ENSMUSG00000002307(Daxx),ENSMUSG00000019979(Apaf1),ENSMUSG00000020709(Adap2),ENSMUSG00000023903(Mmp25),ENSMUSG00000026358(Rgs1),ENSMUSG00000026360(Rgs2),ENSMUSG00000030560(Ctsc),ENSMUSG00000031628(Casp3),ENSMUSG00000036995(Asap3),ENSMUSG00000052087(Rgs14),ENSMUSG00000062232(Rapgef2),ENSMUSG00000069874(Irgm2)	ENSMUSG00000016984(Etaa1),ENSMUSG00000026883(Dab2ip),ENSMUSG00000039831(Arhgap29)
MF	GO:0008970	phospholipase A1 activity	2	0	2	9	0.0106256	0.0979951	ENSMUSG00000053846(Lipg),ENSMUSG00000060675(Plaat3)	-
MF	GO:0035197	siRNA binding	2	0	2	9	0.0106256	0.0979951	ENSMUSG00000044583(Tlr7),ENSMUSG00000045322(Tlr9)	-
BP	GO:0010556	regulation of macromolecule biosynthetic process	67	22	89	3872	0.0107077	0.0985172	ENSMUSG00000000247(Lhx2),ENSMUSG00000001156(Mxd1),ENSMUSG00000001552(Jup),ENSMUSG00000002227(Mov10),ENSMUSG00000002307(Daxx),ENSMUSG00000004040(Stat3),ENSMUSG00000004698(Hdac9),ENSMUSG00000006310(Zbtb32),ENSMUSG00000014773(Dll1),ENSMUSG00000021127(Zfp36l1),ENSMUSG00000021367(Edn1),ENSMUSG00000024079(Eif2ak2),ENSMUSG00000024238(Zeb1),ENSMUSG00000024610(Cd74),ENSMUSG00000024805(Pcgf5),ENSMUSG000000…	ENSMUSG00000025764(Jade1),ENSMUSG00000026873(Phf19),ENSMUSG00000026883(Dab2ip),ENSMUSG00000026975(Dph7),ENSMUSG00000030145(Zfp248),ENSMUSG00000031671(Setd6),ENSMUSG00000034758(Tle6),ENSMUSG00000034800(Zfp661),ENSMUSG00000034957(Cebpa),ENSMUSG00000036867(Smad6),ENSMUSG00000038065(Mturn),ENSMUSG00000038797(Zscan2),ENSMUSG00000042745(Id1),ENSMUSG00000043866(Taf10),ENSMUSG00000046658(Zfp316),ENSMUSG0…
BP	GO:0010506	regulation of autophagy	10	1	11	268	0.0107152	0.0985172	ENSMUSG00000004040(Stat3),ENSMUSG00000030921(Trim30a),ENSMUSG00000038058(Nod1),ENSMUSG00000045322(Tlr9),ENSMUSG00000046879(Irgm1),ENSMUSG00000054072(Iigp1),ENSMUSG00000057596(Trim30d),ENSMUSG00000062960(Kdr),ENSMUSG00000069874(Irgm2),ENSMUSG00000078616(Trim30c)	ENSMUSG00000055485(Soga1)
CC	GO:0043229	intracellular organelle	203	53	256	12518	0.0108106	0.0992415	ENSMUSG00000000184(Ccnd2),ENSMUSG00000000247(Lhx2),ENSMUSG00000001128(Cfp),ENSMUSG00000001156(Mxd1),ENSMUSG00000001552(Jup),ENSMUSG00000002104(Rapsn),ENSMUSG00000002227(Mov10),ENSMUSG00000002307(Daxx),ENSMUSG00000004040(Stat3),ENSMUSG00000004698(Hdac9),ENSMUSG00000005237(Dnah2),ENSMUSG00000006310(Zbtb32),ENSMUSG00000010358(Ifi35),ENSMUSG00000012519(Mlkl),ENSMUSG00000014773(Dll1),ENSMUSG0000001522…	ENSMUSG00000009566(Fpgs),ENSMUSG00000016984(Etaa1),ENSMUSG00000019158(Tmem160),ENSMUSG00000020974(Pole2),ENSMUSG00000024056(Ndc80),ENSMUSG00000025732(Mcrip2),ENSMUSG00000025764(Jade1),ENSMUSG00000025931(Paqr8),ENSMUSG00000026409(Pfkfb2),ENSMUSG00000026575(Nme7),ENSMUSG00000026785(Pkn3),ENSMUSG00000026873(Phf19),ENSMUSG00000026883(Dab2ip),ENSMUSG00000027379(Bub1),ENSMUSG00000027999(Pla2g12a),ENSMU…
BP	GO:1904018	positive regulation of vasculature development	9	0	9	198	0.0109062	0.0999651	ENSMUSG00000001552(Jup),ENSMUSG00000001768(Rin2),ENSMUSG00000004040(Stat3),ENSMUSG00000004698(Hdac9),ENSMUSG00000014773(Dll1),ENSMUSG00000031639(Tlr3),ENSMUSG00000033470(Cysltr2),ENSMUSG00000062232(Rapgef2),ENSMUSG00000062960(Kdr)	-
BP	GO:0002725	negative regulation of T cell cytokine production	2	0	2	9	0.0110296	0.100173	ENSMUSG00000015316(Slamf1),ENSMUSG00000048806(Ifnb1)	-
BP	GO:0031666	positive regulation of lipopolysaccharide-mediated signaling pathway	2	0	2	9	0.0110296	0.100173	ENSMUSG00000021423(Ly86),ENSMUSG00000057135(Scimp)	-
BP	GO:0034351	negative regulation of glial cell apoptotic process	2	0	2	9	0.0110296	0.100173	ENSMUSG00000014773(Dll1),ENSMUSG00000035352(Ccl12)	-
BP	GO:0097527	necroptotic signaling pathway	2	0	2	9	0.0110296	0.100173	ENSMUSG00000012519(Mlkl),ENSMUSG00000031639(Tlr3)	-
BP	GO:1900246	positive regulation of RIG-I signaling pathway	2	0	2	9	0.0110296	0.100173	ENSMUSG00000017830(Dhx58),ENSMUSG00000037921(Ddx60)	-
BP	GO:2000508	regulation of dendritic cell chemotaxis	2	0	2	9	0.0110296	0.100173	ENSMUSG00000015316(Slamf1),ENSMUSG00000037944(Ccr7)	-
BP	GO:0044409	entry into host	6	0	6	102	0.0111343	0.100817	ENSMUSG00000006411(Nectin4),ENSMUSG00000024610(Cd74),ENSMUSG00000025492(Ifitm3),ENSMUSG00000030921(Trim30a),ENSMUSG00000057596(Trim30d),ENSMUSG00000078616(Trim30c)	-
BP	GO:0045639	positive regulation of myeloid cell differentiation	5	1	6	102	0.0111343	0.100817	ENSMUSG00000004040(Stat3),ENSMUSG00000021127(Zfp36l1),ENSMUSG00000024610(Cd74),ENSMUSG00000033871(Ppargc1b),ENSMUSG00000035692(Isg15)	ENSMUSG00000038065(Mturn)
BP	GO:0006733	oxidoreduction coenzyme metabolic process	3	1	4	48	0.011373	0.102822	ENSMUSG00000026866(Kynu),ENSMUSG00000028100(Nudt17),ENSMUSG00000031549(Ido2)	ENSMUSG00000032456(Nmnat3)
BP	GO:0032270	positive regulation of cellular protein metabolic process	38	4	42	1600	0.0114477	0.103341	ENSMUSG00000000184(Ccnd2),ENSMUSG00000002307(Daxx),ENSMUSG00000004040(Stat3),ENSMUSG00000009185(Ccl8),ENSMUSG00000012519(Mlkl),ENSMUSG00000015316(Slamf1),ENSMUSG00000015947(Fcgr1),ENSMUSG00000019979(Apaf1),ENSMUSG00000020717(Pecam1),ENSMUSG00000021367(Edn1),ENSMUSG00000022901(Cd86),ENSMUSG00000023903(Mmp25),ENSMUSG00000024079(Eif2ak2),ENSMUSG00000024397(Aif1),ENSMUSG00000024610(Cd74),ENSMUSG00000…	ENSMUSG00000016984(Etaa1),ENSMUSG00000026873(Phf19),ENSMUSG00000026883(Dab2ip),ENSMUSG00000038065(Mturn)
MF	GO:0019955	cytokine binding	7	0	7	136	0.0114668	0.103357	ENSMUSG00000024610(Cd74),ENSMUSG00000026770(Il2ra),ENSMUSG00000026981(Il1rn),ENSMUSG00000037944(Ccr7),ENSMUSG00000044786(Zfp36),ENSMUSG00000070427(Il18bp),ENSMUSG00000079227(Ccr5)	-
BP	GO:0042104	positive regulation of activated T cell proliferation	3	0	3	26	0.0115491	0.103629	ENSMUSG00000015316(Slamf1),ENSMUSG00000022901(Cd86),ENSMUSG00000026770(Il2ra)	-
BP	GO:0044003	modulation by symbiont of host process	3	0	3	26	0.0115491	0.103629	ENSMUSG00000046879(Irgm1),ENSMUSG00000069874(Irgm2),ENSMUSG00000079227(Ccr5)	-
BP	GO:0050687	negative regulation of defense response to virus	3	0	3	26	0.0115491	0.103629	ENSMUSG00000017830(Dhx58),ENSMUSG00000026770(Il2ra),ENSMUSG00000039899(Fgl2)	-
BP	GO:0031326	regulation of cellular biosynthetic process	70	22	92	4038	0.0118242	0.105938	ENSMUSG00000000247(Lhx2),ENSMUSG00000001156(Mxd1),ENSMUSG00000001552(Jup),ENSMUSG00000002227(Mov10),ENSMUSG00000002307(Daxx),ENSMUSG00000004040(Stat3),ENSMUSG00000004698(Hdac9),ENSMUSG00000006310(Zbtb32),ENSMUSG00000014773(Dll1),ENSMUSG00000021127(Zfp36l1),ENSMUSG00000021367(Edn1),ENSMUSG00000024079(Eif2ak2),ENSMUSG00000024238(Zeb1),ENSMUSG00000024397(Aif1),ENSMUSG00000024610(Cd74),ENSMUSG0000002…	ENSMUSG00000025764(Jade1),ENSMUSG00000026873(Phf19),ENSMUSG00000026883(Dab2ip),ENSMUSG00000026975(Dph7),ENSMUSG00000030145(Zfp248),ENSMUSG00000031671(Setd6),ENSMUSG00000034758(Tle6),ENSMUSG00000034800(Zfp661),ENSMUSG00000034957(Cebpa),ENSMUSG00000036867(Smad6),ENSMUSG00000038065(Mturn),ENSMUSG00000038797(Zscan2),ENSMUSG00000042745(Id1),ENSMUSG00000043866(Taf10),ENSMUSG00000046658(Zfp316),ENSMUSG0…
BP	GO:0030522	intracellular receptor signaling pathway	10	0	10	236	0.0119056	0.106507	ENSMUSG00000002307(Daxx),ENSMUSG00000004040(Stat3),ENSMUSG00000017830(Dhx58),ENSMUSG00000026896(Ifih1),ENSMUSG00000033871(Ppargc1b),ENSMUSG00000036986(Pml),ENSMUSG00000037921(Ddx60),ENSMUSG00000040296(Ddx58),ENSMUSG00000063889(Crem),ENSMUSG00000069874(Irgm2)	-
BP	GO:2000112	regulation of cellular macromolecule biosynthetic process	66	22	88	3839	0.0119916	0.107117	ENSMUSG00000000247(Lhx2),ENSMUSG00000001156(Mxd1),ENSMUSG00000001552(Jup),ENSMUSG00000002227(Mov10),ENSMUSG00000002307(Daxx),ENSMUSG00000004040(Stat3),ENSMUSG00000004698(Hdac9),ENSMUSG00000006310(Zbtb32),ENSMUSG00000014773(Dll1),ENSMUSG00000021127(Zfp36l1),ENSMUSG00000021367(Edn1),ENSMUSG00000024079(Eif2ak2),ENSMUSG00000024238(Zeb1),ENSMUSG00000024610(Cd74),ENSMUSG00000024805(Pcgf5),ENSMUSG000000…	ENSMUSG00000025764(Jade1),ENSMUSG00000026873(Phf19),ENSMUSG00000026883(Dab2ip),ENSMUSG00000026975(Dph7),ENSMUSG00000030145(Zfp248),ENSMUSG00000031671(Setd6),ENSMUSG00000034758(Tle6),ENSMUSG00000034800(Zfp661),ENSMUSG00000034957(Cebpa),ENSMUSG00000036867(Smad6),ENSMUSG00000038065(Mturn),ENSMUSG00000038797(Zscan2),ENSMUSG00000042745(Id1),ENSMUSG00000043866(Taf10),ENSMUSG00000046658(Zfp316),ENSMUSG0…
BP	GO:0045646	regulation of erythrocyte differentiation	4	0	4	49	0.0122095	0.1089	ENSMUSG00000004040(Stat3),ENSMUSG00000021127(Zfp36l1),ENSMUSG00000035692(Isg15),ENSMUSG00000044786(Zfp36)	-
BP	GO:0043087	regulation of GTPase activity	13	2	15	427	0.0125348	0.111635	ENSMUSG00000001768(Rin2),ENSMUSG00000009185(Ccl8),ENSMUSG00000020709(Adap2),ENSMUSG00000020717(Pecam1),ENSMUSG00000021886(Gpr65),ENSMUSG00000026358(Rgs1),ENSMUSG00000026360(Rgs2),ENSMUSG00000031292(Cdkl5),ENSMUSG00000035352(Ccl12),ENSMUSG00000036995(Asap3),ENSMUSG00000037944(Ccr7),ENSMUSG00000052087(Rgs14),ENSMUSG00000062232(Rapgef2)	ENSMUSG00000026883(Dab2ip),ENSMUSG00000039831(Arhgap29)
BP	GO:2000113	negative regulation of cellular macromolecule biosynthetic process	32	9	41	1564	0.0126767	0.11273	ENSMUSG00000001156(Mxd1),ENSMUSG00000002227(Mov10),ENSMUSG00000002307(Daxx),ENSMUSG00000004040(Stat3),ENSMUSG00000004698(Hdac9),ENSMUSG00000006310(Zbtb32),ENSMUSG00000021127(Zfp36l1),ENSMUSG00000021367(Edn1),ENSMUSG00000024079(Eif2ak2),ENSMUSG00000024238(Zeb1),ENSMUSG00000026360(Rgs2),ENSMUSG00000026536(Ifi211),ENSMUSG00000027018(Hat1),ENSMUSG00000027641(Rbl1),ENSMUSG00000033871(Ppargc1b),ENSMUSG…	ENSMUSG00000026873(Phf19),ENSMUSG00000026883(Dab2ip),ENSMUSG00000030145(Zfp248),ENSMUSG00000034758(Tle6),ENSMUSG00000034957(Cebpa),ENSMUSG00000042745(Id1),ENSMUSG00000056501(Cebpb),ENSMUSG00000069272(H2ac8),ENSMUSG00000074519(Zfp971)
BP	GO:0072676	lymphocyte migration	5	1	6	105	0.0127203	0.11295	ENSMUSG00000009185(Ccl8),ENSMUSG00000024397(Aif1),ENSMUSG00000034855(Cxcl10),ENSMUSG00000035352(Ccl12),ENSMUSG00000037944(Ccr7)	ENSMUSG00000028539(Artn)
MF	GO:0008296	3'-5'-exodeoxyribonuclease activity	1	1	2	10	0.0131257	0.116203	ENSMUSG00000039236(Isg20)	ENSMUSG00000038644(Pold1)
MF	GO:0050308	sugar-phosphatase activity	1	1	2	10	0.0131257	0.116203	ENSMUSG00000026773(Pfkfb3)	ENSMUSG00000026409(Pfkfb2)
BP	GO:0022603	regulation of anatomical structure morphogenesis	26	4	30	1067	0.0131894	0.116595	ENSMUSG00000001552(Jup),ENSMUSG00000001768(Rin2),ENSMUSG00000002227(Mov10),ENSMUSG00000004040(Stat3),ENSMUSG00000004698(Hdac9),ENSMUSG00000009185(Ccl8),ENSMUSG00000014773(Dll1),ENSMUSG00000015222(Map2),ENSMUSG00000021367(Edn1),ENSMUSG00000023307(Marchf5),ENSMUSG00000026121(Sema4c),ENSMUSG00000026222(Sp100),ENSMUSG00000026981(Il1rn),ENSMUSG00000029204(Rhoh),ENSMUSG00000029417(Cxcl9),ENSMUSG0000003…	ENSMUSG00000001227(Sema6b),ENSMUSG00000026883(Dab2ip),ENSMUSG00000042745(Id1),ENSMUSG00000052934(Fbxo31)
BP	GO:0007165	signal transduction	120	19	139	6479	0.013311	0.117495	ENSMUSG00000001768(Rin2),ENSMUSG00000002307(Daxx),ENSMUSG00000004040(Stat3),ENSMUSG00000009185(Ccl8),ENSMUSG00000010358(Ifi35),ENSMUSG00000012519(Mlkl),ENSMUSG00000014361(Mertk),ENSMUSG00000014773(Dll1),ENSMUSG00000015316(Slamf1),ENSMUSG00000015852(Fcrls),ENSMUSG00000015947(Fcgr1),ENSMUSG00000016524(Il19),ENSMUSG00000017314(Mpp2),ENSMUSG00000017830(Dhx58),ENSMUSG00000019979(Apaf1),ENSMUSG00000019…	ENSMUSG00000001227(Sema6b),ENSMUSG00000022494(Shisa9),ENSMUSG00000023915(Tnfrsf21),ENSMUSG00000024186(Rgs11),ENSMUSG00000025764(Jade1),ENSMUSG00000025931(Paqr8),ENSMUSG00000026785(Pkn3),ENSMUSG00000026883(Dab2ip),ENSMUSG00000028539(Artn),ENSMUSG00000032641(Gpr19),ENSMUSG00000034758(Tle6),ENSMUSG00000034957(Cebpa),ENSMUSG00000036867(Smad6),ENSMUSG00000038065(Mturn),ENSMUSG00000038607(Gng10),ENSMUS…
BP	GO:0002664	regulation of T cell tolerance induction	2	0	2	10	0.0136215	0.118492	ENSMUSG00000022901(Cd86),ENSMUSG00000026770(Il2ra)	-
BP	GO:0002866	positive regulation of acute inflammatory response to antigenic stimulus	2	0	2	10	0.0136215	0.118492	ENSMUSG00000015947(Fcgr1),ENSMUSG00000037944(Ccr7)	-
BP	GO:0009265	2'-deoxyribonucleotide biosynthetic process	2	0	2	10	0.0136215	0.118492	ENSMUSG00000020638(Cmpk2),ENSMUSG00000029366(Dck)	-
BP	GO:0031642	negative regulation of myelination	1	1	2	10	0.0136215	0.118492	ENSMUSG00000030560(Ctsc)	ENSMUSG00000023915(Tnfrsf21)
BP	GO:0045657	positive regulation of monocyte differentiation	2	0	2	10	0.0136215	0.118492	ENSMUSG00000021127(Zfp36l1),ENSMUSG00000024610(Cd74)	-
BP	GO:0046385	deoxyribose phosphate biosynthetic process	2	0	2	10	0.0136215	0.118492	ENSMUSG00000020638(Cmpk2),ENSMUSG00000029366(Dck)	-
BP	GO:0061635	regulation of protein complex stability	1	1	2	10	0.0136215	0.118492	ENSMUSG00000069874(Irgm2)	ENSMUSG00000066839(Ecsit)
BP	GO:2000551	regulation of T-helper 2 cell cytokine production	2	0	2	10	0.0136215	0.118492	ENSMUSG00000020641(Rsad2),ENSMUSG00000048806(Ifnb1)	-
BP	GO:2001214	positive regulation of vasculogenesis	2	0	2	10	0.0136215	0.118492	ENSMUSG00000001768(Rin2),ENSMUSG00000062232(Rapgef2)	-
BP	GO:0006935	chemotaxis	17	2	19	594	0.0136225	0.118492	ENSMUSG00000000247(Lhx2),ENSMUSG00000009185(Ccl8),ENSMUSG00000015316(Slamf1),ENSMUSG00000021367(Edn1),ENSMUSG00000024397(Aif1),ENSMUSG00000024610(Cd74),ENSMUSG00000026121(Sema4c),ENSMUSG00000026581(Sell),ENSMUSG00000026764(Kif5c),ENSMUSG00000029204(Rhoh),ENSMUSG00000029417(Cxcl9),ENSMUSG00000034855(Cxcl10),ENSMUSG00000035352(Ccl12),ENSMUSG00000037944(Ccr7),ENSMUSG00000048534(Jaml),ENSMUSG00000062…	ENSMUSG00000001227(Sema6b),ENSMUSG00000028539(Artn)
BP	GO:1902531	regulation of intracellular signal transduction	38	3	41	1572	0.0137086	0.119039	ENSMUSG00000009185(Ccl8),ENSMUSG00000010358(Ifi35),ENSMUSG00000012519(Mlkl),ENSMUSG00000015316(Slamf1),ENSMUSG00000016524(Il19),ENSMUSG00000017830(Dhx58),ENSMUSG00000021367(Edn1),ENSMUSG00000022901(Cd86),ENSMUSG00000024079(Eif2ak2),ENSMUSG00000024610(Cd74),ENSMUSG00000026121(Sema4c),ENSMUSG00000026360(Rgs2),ENSMUSG00000026981(Il1rn),ENSMUSG00000029204(Rhoh),ENSMUSG00000030921(Trim30a),ENSMUSG0000…	ENSMUSG00000026883(Dab2ip),ENSMUSG00000038065(Mturn),ENSMUSG00000042745(Id1)
CC	GO:0005622	intracellular	224	61	285	14178	0.0137253	0.119039	ENSMUSG00000000184(Ccnd2),ENSMUSG00000000247(Lhx2),ENSMUSG00000001128(Cfp),ENSMUSG00000001156(Mxd1),ENSMUSG00000001552(Jup),ENSMUSG00000001768(Rin2),ENSMUSG00000002104(Rapsn),ENSMUSG00000002227(Mov10),ENSMUSG00000002307(Daxx),ENSMUSG00000004040(Stat3),ENSMUSG00000004698(Hdac9),ENSMUSG00000005237(Dnah2),ENSMUSG00000006310(Zbtb32),ENSMUSG00000010358(Ifi35),ENSMUSG00000012519(Mlkl),ENSMUSG0000001436…	ENSMUSG00000002769(Gnmt),ENSMUSG00000009566(Fpgs),ENSMUSG00000016984(Etaa1),ENSMUSG00000019158(Tmem160),ENSMUSG00000020974(Pole2),ENSMUSG00000022474(Pmm1),ENSMUSG00000023915(Tnfrsf21),ENSMUSG00000024056(Ndc80),ENSMUSG00000025732(Mcrip2),ENSMUSG00000025764(Jade1),ENSMUSG00000025931(Paqr8),ENSMUSG00000026409(Pfkfb2),ENSMUSG00000026575(Nme7),ENSMUSG00000026785(Pkn3),ENSMUSG00000026873(Phf19),ENSMUSG…
BP	GO:0002702	positive regulation of production of molecular mediator of immune response	6	0	6	107	0.0138618	0.120048	ENSMUSG00000020641(Rsad2),ENSMUSG00000024610(Cd74),ENSMUSG00000037447(Arid5a),ENSMUSG00000040296(Ddx58),ENSMUSG00000045322(Tlr9),ENSMUSG00000057135(Scimp)	-
CC	GO:0009986	cell surface	27	0	27	919	0.0139442	0.120473	ENSMUSG00000015316(Slamf1),ENSMUSG00000015947(Fcgr1),ENSMUSG00000020717(Pecam1),ENSMUSG00000022901(Cd86),ENSMUSG00000023206(Il15ra),ENSMUSG00000023903(Mmp25),ENSMUSG00000024610(Cd74),ENSMUSG00000025492(Ifitm3),ENSMUSG00000026581(Sell),ENSMUSG00000026770(Il2ra),ENSMUSG00000029417(Cxcl9),ENSMUSG00000030149(Klrk1),ENSMUSG00000031553(Adam3),ENSMUSG00000031639(Tlr3),ENSMUSG00000031712(Il15),ENSMUSG000…	-
MF	GO:0061629	RNA polymerase II-specific DNA-binding transcription factor binding	7	4	11	284	0.0139512	0.120473	ENSMUSG00000001552(Jup),ENSMUSG00000002307(Daxx),ENSMUSG00000004040(Stat3),ENSMUSG00000014773(Dll1),ENSMUSG00000027641(Rbl1),ENSMUSG00000033871(Ppargc1b),ENSMUSG00000037447(Arid5a)	ENSMUSG00000030852(Tacc2),ENSMUSG00000031671(Setd6),ENSMUSG00000043866(Taf10),ENSMUSG00000056501(Cebpb)
BP	GO:0071384	cellular response to corticosteroid stimulus	4	1	5	78	0.0141565	0.121361	ENSMUSG00000021127(Zfp36l1),ENSMUSG00000021367(Edn1),ENSMUSG00000044786(Zfp36),ENSMUSG00000048806(Ifnb1)	ENSMUSG00000033863(Klf9)
BP	GO:0001783	B cell apoptotic process	2	1	3	28	0.0141669	0.121361	ENSMUSG00000024610(Cd74),ENSMUSG00000062007(Hsh2d)	ENSMUSG00000023915(Tnfrsf21)
BP	GO:0002476	antigen processing and presentation of endogenous peptide antigen via MHC class Ib	3	0	3	28	0.0141669	0.121361	ENSMUSG00000035929(H2-Q4),ENSMUSG00000053835(H2-T24),ENSMUSG00000056116(H2-T22)	-
BP	GO:0032069	regulation of nuclease activity	3	0	3	28	0.0141669	0.121361	ENSMUSG00000032661(Oas3),ENSMUSG00000041827(Oasl1),ENSMUSG00000066861(Oas1g)	-
CC	GO:0032009	early phagosome	2	0	2	10	0.0141761	0.121361	ENSMUSG00000044583(Tlr7),ENSMUSG00000045322(Tlr9)	-
CC	GO:0097197	tetraspanin-enriched microdomain	2	0	2	10	0.0141761	0.121361	ENSMUSG00000027639(Samhd1),ENSMUSG00000057135(Scimp)	-
BP	GO:0042100	B cell proliferation	4	2	6	108	0.0144585	0.123601	ENSMUSG00000024610(Cd74),ENSMUSG00000031628(Casp3),ENSMUSG00000045322(Tlr9),ENSMUSG00000048806(Ifnb1)	ENSMUSG00000023915(Tnfrsf21),ENSMUSG00000046006(Gapt)
BP	GO:0001659	temperature homeostasis	6	2	8	173	0.0145048	0.12382	ENSMUSG00000004040(Stat3),ENSMUSG00000026981(Il1rn),ENSMUSG00000031712(Il15),ENSMUSG00000033871(Ppargc1b),ENSMUSG00000034997(Htr2a),ENSMUSG00000079227(Ccr5)	ENSMUSG00000042745(Id1),ENSMUSG00000056501(Cebpb)
BP	GO:0010558	negative regulation of macromolecule biosynthetic process	32	9	41	1578	0.014527	0.123833	ENSMUSG00000001156(Mxd1),ENSMUSG00000002227(Mov10),ENSMUSG00000002307(Daxx),ENSMUSG00000004040(Stat3),ENSMUSG00000004698(Hdac9),ENSMUSG00000006310(Zbtb32),ENSMUSG00000021127(Zfp36l1),ENSMUSG00000021367(Edn1),ENSMUSG00000024079(Eif2ak2),ENSMUSG00000024238(Zeb1),ENSMUSG00000026360(Rgs2),ENSMUSG00000026536(Ifi211),ENSMUSG00000027018(Hat1),ENSMUSG00000027641(Rbl1),ENSMUSG00000033871(Ppargc1b),ENSMUSG…	ENSMUSG00000026873(Phf19),ENSMUSG00000026883(Dab2ip),ENSMUSG00000030145(Zfp248),ENSMUSG00000034758(Tle6),ENSMUSG00000034957(Cebpa),ENSMUSG00000042745(Id1),ENSMUSG00000056501(Cebpb),ENSMUSG00000069272(H2ac8),ENSMUSG00000074519(Zfp971)
BP	GO:0042330	taxis	17	2	19	599	0.0147544	0.125484	ENSMUSG00000000247(Lhx2),ENSMUSG00000009185(Ccl8),ENSMUSG00000015316(Slamf1),ENSMUSG00000021367(Edn1),ENSMUSG00000024397(Aif1),ENSMUSG00000024610(Cd74),ENSMUSG00000026121(Sema4c),ENSMUSG00000026581(Sell),ENSMUSG00000026764(Kif5c),ENSMUSG00000029204(Rhoh),ENSMUSG00000029417(Cxcl9),ENSMUSG00000034855(Cxcl10),ENSMUSG00000035352(Ccl12),ENSMUSG00000037944(Ccr7),ENSMUSG00000048534(Jaml),ENSMUSG00000062…	ENSMUSG00000001227(Sema6b),ENSMUSG00000028539(Artn)
MF	GO:0140297	DNA-binding transcription factor binding	8	5	13	364	0.0147886	0.125484	ENSMUSG00000001552(Jup),ENSMUSG00000002307(Daxx),ENSMUSG00000004040(Stat3),ENSMUSG00000004698(Hdac9),ENSMUSG00000014773(Dll1),ENSMUSG00000027641(Rbl1),ENSMUSG00000033871(Ppargc1b),ENSMUSG00000037447(Arid5a)	ENSMUSG00000030852(Tacc2),ENSMUSG00000031671(Setd6),ENSMUSG00000034758(Tle6),ENSMUSG00000043866(Taf10),ENSMUSG00000056501(Cebpb)
BP	GO:0043412	macromolecule modification	72	19	91	4023	0.0148037	0.125484	ENSMUSG00000000184(Ccnd2),ENSMUSG00000002307(Daxx),ENSMUSG00000004698(Hdac9),ENSMUSG00000009185(Ccl8),ENSMUSG00000012519(Mlkl),ENSMUSG00000014361(Mertk),ENSMUSG00000015316(Slamf1),ENSMUSG00000015947(Fcgr1),ENSMUSG00000020717(Pecam1),ENSMUSG00000021127(Zfp36l1),ENSMUSG00000021367(Edn1),ENSMUSG00000022684(Bfar),ENSMUSG00000022876(Samsn1),ENSMUSG00000022901(Cd86),ENSMUSG00000023307(Marchf5),ENSMUSG0…	ENSMUSG00000016984(Etaa1),ENSMUSG00000022474(Pmm1),ENSMUSG00000025764(Jade1),ENSMUSG00000026785(Pkn3),ENSMUSG00000026873(Phf19),ENSMUSG00000026883(Dab2ip),ENSMUSG00000026975(Dph7),ENSMUSG00000027379(Bub1),ENSMUSG00000031458(Coprs),ENSMUSG00000031671(Setd6),ENSMUSG00000036867(Smad6),ENSMUSG00000038065(Mturn),ENSMUSG00000038074(Fkbp14),ENSMUSG00000040102(Klhl42),ENSMUSG00000042745(Id1),ENSMUSG00000…
MF	GO:0042287	MHC protein binding	3	0	3	29	0.0148048	0.125484	ENSMUSG00000024610(Cd74),ENSMUSG00000030149(Klrk1),ENSMUSG00000037321(Tap1)	-
BP	GO:0006956	complement activation	4	0	4	52	0.0149516	0.126548	ENSMUSG00000001128(Cfp),ENSMUSG00000036887(C1qa),ENSMUSG00000036905(C1qb),ENSMUSG00000073418(C4b)	-
MF	GO:0004540	ribonuclease activity	5	1	6	111	0.0149961	0.126744	ENSMUSG00000020464(Pnpt1),ENSMUSG00000027639(Samhd1),ENSMUSG00000035208(Slfn8),ENSMUSG00000039236(Isg20),ENSMUSG00000069793(Slfn9)	ENSMUSG00000060152(Pop5)
BP	GO:0006357	regulation of transcription by RNA polymerase II	44	15	59	2439	0.0150826	0.127295	ENSMUSG00000000247(Lhx2),ENSMUSG00000001156(Mxd1),ENSMUSG00000001552(Jup),ENSMUSG00000004040(Stat3),ENSMUSG00000004698(Hdac9),ENSMUSG00000006310(Zbtb32),ENSMUSG00000014773(Dll1),ENSMUSG00000021367(Edn1),ENSMUSG00000024238(Zeb1),ENSMUSG00000024805(Pcgf5),ENSMUSG00000025498(Irf7),ENSMUSG00000026222(Sp100),ENSMUSG00000026536(Ifi211),ENSMUSG00000027641(Rbl1),ENSMUSG00000031639(Tlr3),ENSMUSG0000003251…	ENSMUSG00000026873(Phf19),ENSMUSG00000026883(Dab2ip),ENSMUSG00000030145(Zfp248),ENSMUSG00000034758(Tle6),ENSMUSG00000034800(Zfp661),ENSMUSG00000034957(Cebpa),ENSMUSG00000036867(Smad6),ENSMUSG00000038797(Zscan2),ENSMUSG00000042745(Id1),ENSMUSG00000056501(Cebpb),ENSMUSG00000069206(Zfp874a),ENSMUSG00000070822(Zscan18),ENSMUSG00000071064(Zfp827),ENSMUSG00000074519(Zfp971),ENSMUSG00000078870(Gm14410)
BP	GO:0006351	transcription, DNA-templated	60	21	81	3527	0.015456	0.130263	ENSMUSG00000000247(Lhx2),ENSMUSG00000001156(Mxd1),ENSMUSG00000001552(Jup),ENSMUSG00000002307(Daxx),ENSMUSG00000004040(Stat3),ENSMUSG00000004698(Hdac9),ENSMUSG00000006310(Zbtb32),ENSMUSG00000014773(Dll1),ENSMUSG00000021367(Edn1),ENSMUSG00000024079(Eif2ak2),ENSMUSG00000024238(Zeb1),ENSMUSG00000024610(Cd74),ENSMUSG00000024805(Pcgf5),ENSMUSG00000025498(Irf7),ENSMUSG00000026104(Stat1),ENSMUSG000000262…	ENSMUSG00000025764(Jade1),ENSMUSG00000026873(Phf19),ENSMUSG00000026883(Dab2ip),ENSMUSG00000030145(Zfp248),ENSMUSG00000031671(Setd6),ENSMUSG00000034758(Tle6),ENSMUSG00000034800(Zfp661),ENSMUSG00000034957(Cebpa),ENSMUSG00000036867(Smad6),ENSMUSG00000038065(Mturn),ENSMUSG00000038797(Zscan2),ENSMUSG00000042745(Id1),ENSMUSG00000043866(Taf10),ENSMUSG00000046658(Zfp316),ENSMUSG00000056501(Cebpb),ENSMUSG…
BP	GO:0097659	nucleic acid-templated transcription	60	21	81	3528	0.0155576	0.130666	ENSMUSG00000000247(Lhx2),ENSMUSG00000001156(Mxd1),ENSMUSG00000001552(Jup),ENSMUSG00000002307(Daxx),ENSMUSG00000004040(Stat3),ENSMUSG00000004698(Hdac9),ENSMUSG00000006310(Zbtb32),ENSMUSG00000014773(Dll1),ENSMUSG00000021367(Edn1),ENSMUSG00000024079(Eif2ak2),ENSMUSG00000024238(Zeb1),ENSMUSG00000024610(Cd74),ENSMUSG00000024805(Pcgf5),ENSMUSG00000025498(Irf7),ENSMUSG00000026104(Stat1),ENSMUSG000000262…	ENSMUSG00000025764(Jade1),ENSMUSG00000026873(Phf19),ENSMUSG00000026883(Dab2ip),ENSMUSG00000030145(Zfp248),ENSMUSG00000031671(Setd6),ENSMUSG00000034758(Tle6),ENSMUSG00000034800(Zfp661),ENSMUSG00000034957(Cebpa),ENSMUSG00000036867(Smad6),ENSMUSG00000038065(Mturn),ENSMUSG00000038797(Zscan2),ENSMUSG00000042745(Id1),ENSMUSG00000043866(Taf10),ENSMUSG00000046658(Zfp316),ENSMUSG00000056501(Cebpb),ENSMUSG…
BP	GO:0002428	antigen processing and presentation of peptide antigen via MHC class Ib	3	0	3	29	0.0155914	0.130666	ENSMUSG00000035929(H2-Q4),ENSMUSG00000053835(H2-T24),ENSMUSG00000056116(H2-T22)	-
BP	GO:0002507	tolerance induction	3	0	3	29	0.0155914	0.130666	ENSMUSG00000022901(Cd86),ENSMUSG00000026770(Il2ra),ENSMUSG00000037944(Ccr7)	-
BP	GO:0061157	mRNA destabilization	3	0	3	29	0.0155914	0.130666	ENSMUSG00000002227(Mov10),ENSMUSG00000021127(Zfp36l1),ENSMUSG00000044786(Zfp36)	-
MF	GO:0019203	carbohydrate phosphatase activity	1	1	2	11	0.0158539	0.13227	ENSMUSG00000026773(Pfkfb3)	ENSMUSG00000026409(Pfkfb2)
BP	GO:0032653	regulation of interleukin-10 production	3	1	4	53	0.015945	0.13227	ENSMUSG00000004040(Stat3),ENSMUSG00000014773(Dll1),ENSMUSG00000045322(Tlr9)	ENSMUSG00000023915(Tnfrsf21)
BP	GO:0050922	negative regulation of chemotaxis	3	1	4	53	0.015945	0.13227	ENSMUSG00000024397(Aif1),ENSMUSG00000026121(Sema4c),ENSMUSG00000035352(Ccl12)	ENSMUSG00000001227(Sema6b)
BP	GO:0031327	negative regulation of cellular biosynthetic process	33	9	42	1636	0.0161653	0.13227	ENSMUSG00000001156(Mxd1),ENSMUSG00000002227(Mov10),ENSMUSG00000002307(Daxx),ENSMUSG00000004040(Stat3),ENSMUSG00000004698(Hdac9),ENSMUSG00000006310(Zbtb32),ENSMUSG00000021127(Zfp36l1),ENSMUSG00000021367(Edn1),ENSMUSG00000024079(Eif2ak2),ENSMUSG00000024238(Zeb1),ENSMUSG00000026360(Rgs2),ENSMUSG00000026536(Ifi211),ENSMUSG00000027018(Hat1),ENSMUSG00000027641(Rbl1),ENSMUSG00000033871(Ppargc1b),ENSMUSG…	ENSMUSG00000026873(Phf19),ENSMUSG00000026883(Dab2ip),ENSMUSG00000030145(Zfp248),ENSMUSG00000034758(Tle6),ENSMUSG00000034957(Cebpa),ENSMUSG00000042745(Id1),ENSMUSG00000056501(Cebpb),ENSMUSG00000069272(H2ac8),ENSMUSG00000074519(Zfp971)
MF	GO:0004623	phospholipase A2 activity	2	1	3	30	0.0162355	0.13227	ENSMUSG00000033847(Pla2g4c),ENSMUSG00000060675(Plaat3)	ENSMUSG00000027999(Pla2g12a)
MF	GO:0071889	14-3-3 protein binding	2	1	3	30	0.0162355	0.13227	ENSMUSG00000021127(Zfp36l1),ENSMUSG00000044786(Zfp36)	ENSMUSG00000026883(Dab2ip)
MF	GO:0016922	nuclear receptor binding	4	2	6	113	0.0162486	0.13227	ENSMUSG00000002307(Daxx),ENSMUSG00000004040(Stat3),ENSMUSG00000033871(Ppargc1b),ENSMUSG00000037447(Arid5a)	ENSMUSG00000043866(Taf10),ENSMUSG00000056501(Cebpb)
BP	GO:0051093	negative regulation of developmental process	25	5	30	1085	0.0162659	0.13227	ENSMUSG00000000247(Lhx2),ENSMUSG00000004040(Stat3),ENSMUSG00000014773(Dll1),ENSMUSG00000015222(Map2),ENSMUSG00000021127(Zfp36l1),ENSMUSG00000022901(Cd86),ENSMUSG00000023206(Il15ra),ENSMUSG00000023307(Marchf5),ENSMUSG00000023367(Tmem176a),ENSMUSG00000024238(Zeb1),ENSMUSG00000024610(Cd74),ENSMUSG00000026121(Sema4c),ENSMUSG00000026360(Rgs2),ENSMUSG00000027641(Rbl1),ENSMUSG00000029810(Tmem176b),ENSMU…	ENSMUSG00000001227(Sema6b),ENSMUSG00000023915(Tnfrsf21),ENSMUSG00000026883(Dab2ip),ENSMUSG00000036867(Smad6),ENSMUSG00000042745(Id1)
BP	GO:0002883	regulation of hypersensitivity	2	0	2	11	0.016449	0.13227	ENSMUSG00000015947(Fcgr1),ENSMUSG00000037944(Ccr7)	-
BP	GO:0032725	positive regulation of granulocyte macrophage colony-stimulating factor production	2	0	2	11	0.016449	0.13227	ENSMUSG00000040296(Ddx58),ENSMUSG00000045322(Tlr9)	-
BP	GO:0034163	regulation of toll-like receptor 9 signaling pathway	2	0	2	11	0.016449	0.13227	ENSMUSG00000020641(Rsad2),ENSMUSG00000045322(Tlr9)	-
BP	GO:0035745	T-helper 2 cell cytokine production	2	0	2	11	0.016449	0.13227	ENSMUSG00000020641(Rsad2),ENSMUSG00000048806(Ifnb1)	-
BP	GO:0045602	negative regulation of endothelial cell differentiation	1	1	2	11	0.016449	0.13227	ENSMUSG00000024238(Zeb1)	ENSMUSG00000042745(Id1)
BP	GO:0045625	regulation of T-helper 1 cell differentiation	2	0	2	11	0.016449	0.13227	ENSMUSG00000037944(Ccr7),ENSMUSG00000044701(Il27)	-
BP	GO:0046598	positive regulation of viral entry into host cell	2	0	2	11	0.016449	0.13227	ENSMUSG00000024610(Cd74),ENSMUSG00000030921(Trim30a)	-
BP	GO:0070189	kynurenine metabolic process	2	0	2	11	0.016449	0.13227	ENSMUSG00000026866(Kynu),ENSMUSG00000031549(Ido2)	-
BP	GO:0070213	protein auto-ADP-ribosylation	2	0	2	11	0.016449	0.13227	ENSMUSG00000034640(Tiparp),ENSMUSG00000037997(Parp11)	-
BP	GO:0075294	positive regulation by symbiont of entry into host	2	0	2	11	0.016449	0.13227	ENSMUSG00000024610(Cd74),ENSMUSG00000030921(Trim30a)	-
BP	GO:0140289	protein mono-ADP-ribosylation	2	0	2	11	0.016449	0.13227	ENSMUSG00000034640(Tiparp),ENSMUSG00000037997(Parp11)	-
BP	GO:0006366	transcription by RNA polymerase II	44	16	60	2500	0.0165872	0.13227	ENSMUSG00000000247(Lhx2),ENSMUSG00000001156(Mxd1),ENSMUSG00000001552(Jup),ENSMUSG00000004040(Stat3),ENSMUSG00000004698(Hdac9),ENSMUSG00000006310(Zbtb32),ENSMUSG00000014773(Dll1),ENSMUSG00000021367(Edn1),ENSMUSG00000024238(Zeb1),ENSMUSG00000024805(Pcgf5),ENSMUSG00000025498(Irf7),ENSMUSG00000026222(Sp100),ENSMUSG00000026536(Ifi211),ENSMUSG00000027641(Rbl1),ENSMUSG00000031639(Tlr3),ENSMUSG0000003251…	ENSMUSG00000026873(Phf19),ENSMUSG00000026883(Dab2ip),ENSMUSG00000030145(Zfp248),ENSMUSG00000034758(Tle6),ENSMUSG00000034800(Zfp661),ENSMUSG00000034957(Cebpa),ENSMUSG00000036867(Smad6),ENSMUSG00000038797(Zscan2),ENSMUSG00000042745(Id1),ENSMUSG00000043866(Taf10),ENSMUSG00000056501(Cebpb),ENSMUSG00000069206(Zfp874a),ENSMUSG00000070822(Zscan18),ENSMUSG00000071064(Zfp827),ENSMUSG00000074519(Zfp971),EN…
MF	GO:0051427	hormone receptor binding	5	3	8	181	0.016695	0.13227	ENSMUSG00000001552(Jup),ENSMUSG00000002307(Daxx),ENSMUSG00000004040(Stat3),ENSMUSG00000033871(Ppargc1b),ENSMUSG00000037447(Arid5a)	ENSMUSG00000030852(Tacc2),ENSMUSG00000043866(Taf10),ENSMUSG00000056501(Cebpb)
CC	GO:0005615	extracellular space	37	6	43	1653	0.0170273	0.13227	ENSMUSG00000001128(Cfp),ENSMUSG00000003617(Cp),ENSMUSG00000009185(Ccl8),ENSMUSG00000010358(Ifi35),ENSMUSG00000014361(Mertk),ENSMUSG00000016524(Il19),ENSMUSG00000020717(Pecam1),ENSMUSG00000021367(Edn1),ENSMUSG00000021423(Ly86),ENSMUSG00000022901(Cd86),ENSMUSG00000022938(Fam3b),ENSMUSG00000023206(Il15ra),ENSMUSG00000024610(Cd74),ENSMUSG00000024887(Asah2),ENSMUSG00000026121(Sema4c),ENSMUSG0000002698…	ENSMUSG00000000983(Wfdc18),ENSMUSG00000001227(Sema6b),ENSMUSG00000004105(Angptl2),ENSMUSG00000028539(Artn),ENSMUSG00000050967(Creg2),ENSMUSG00000055485(Soga1)
BP	GO:0002675	positive regulation of acute inflammatory response	3	0	3	30	0.0170937	0.13227	ENSMUSG00000015947(Fcgr1),ENSMUSG00000037944(Ccr7),ENSMUSG00000079227(Ccr5)	-
BP	GO:0060142	regulation of syncytium formation by plasma membrane fusion	3	0	3	30	0.0170937	0.13227	ENSMUSG00000009185(Ccl8),ENSMUSG00000029417(Cxcl9),ENSMUSG00000034855(Cxcl10)	-
CC	GO:0044294	dendritic growth cone	2	0	2	11	0.0171144	0.13227	ENSMUSG00000015222(Map2),ENSMUSG00000031292(Cdkl5)	-
BP	GO:0032774	RNA biosynthetic process	60	21	81	3543	0.0171492	0.13227	ENSMUSG00000000247(Lhx2),ENSMUSG00000001156(Mxd1),ENSMUSG00000001552(Jup),ENSMUSG00000002307(Daxx),ENSMUSG00000004040(Stat3),ENSMUSG00000004698(Hdac9),ENSMUSG00000006310(Zbtb32),ENSMUSG00000014773(Dll1),ENSMUSG00000021367(Edn1),ENSMUSG00000024079(Eif2ak2),ENSMUSG00000024238(Zeb1),ENSMUSG00000024610(Cd74),ENSMUSG00000024805(Pcgf5),ENSMUSG00000025498(Irf7),ENSMUSG00000026104(Stat1),ENSMUSG000000262…	ENSMUSG00000025764(Jade1),ENSMUSG00000026873(Phf19),ENSMUSG00000026883(Dab2ip),ENSMUSG00000030145(Zfp248),ENSMUSG00000031671(Setd6),ENSMUSG00000034758(Tle6),ENSMUSG00000034800(Zfp661),ENSMUSG00000034957(Cebpa),ENSMUSG00000036867(Smad6),ENSMUSG00000038065(Mturn),ENSMUSG00000038797(Zscan2),ENSMUSG00000042745(Id1),ENSMUSG00000043866(Taf10),ENSMUSG00000046658(Zfp316),ENSMUSG00000056501(Cebpb),ENSMUSG…
BP	GO:0002821	positive regulation of adaptive immune response	6	0	6	113	0.0177115	0.13227	ENSMUSG00000015947(Fcgr1),ENSMUSG00000020641(Rsad2),ENSMUSG00000024610(Cd74),ENSMUSG00000037447(Arid5a),ENSMUSG00000037944(Ccr7),ENSMUSG00000073421(H2-Ab1)	-
BP	GO:0046939	nucleotide phosphorylation	4	2	6	113	0.0177115	0.13227	ENSMUSG00000004040(Stat3),ENSMUSG00000020638(Cmpk2),ENSMUSG00000029366(Dck),ENSMUSG00000034997(Htr2a)	ENSMUSG00000026409(Pfkfb2),ENSMUSG00000026575(Nme7)
MF	GO:0000170	sphingosine hydroxylase activity	1	0	1	1	0.0179357	0.13227	ENSMUSG00000021263(Degs2)	-
MF	GO:0001884	pyrimidine nucleoside binding	1	0	1	1	0.0179357	0.13227	ENSMUSG00000029366(Dck)	-
MF	GO:0004326	tetrahydrofolylpolyglutamate synthase activity	0	1	1	1	0.0179357	0.13227	-	ENSMUSG00000009566(Fpgs)
MF	GO:0004398	histidine decarboxylase activity	1	0	1	1	0.0179357	0.13227	ENSMUSG00000027360(Hdc)	-
MF	GO:0004654	polyribonucleotide nucleotidyltransferase activity	1	0	1	1	0.0179357	0.13227	ENSMUSG00000020464(Pnpt1)	-
MF	GO:0004766	spermidine synthase activity	0	1	1	1	0.0179357	0.13227	-	ENSMUSG00000006442(Srm)
MF	GO:0005151	interleukin-1, type II receptor binding	1	0	1	1	0.0179357	0.13227	ENSMUSG00000026981(Il1rn)	-
MF	GO:0008523	sodium-dependent multivitamin transmembrane transporter activity	0	1	1	1	0.0179357	0.13227	-	ENSMUSG00000006641(Slc5a6)
MF	GO:0008811	chloramphenicol O-acetyltransferase activity	1	0	1	1	0.0179357	0.13227	ENSMUSG00000048806(Ifnb1)	-
MF	GO:0008832	dGTPase activity	1	0	1	1	0.0179357	0.13227	ENSMUSG00000027639(Samhd1)	-
MF	GO:0008859	exoribonuclease II activity	1	0	1	1	0.0179357	0.13227	ENSMUSG00000039236(Isg20)	-
MF	GO:0015233	pantothenate transmembrane transporter activity	0	1	1	1	0.0179357	0.13227	-	ENSMUSG00000006641(Slc5a6)
MF	GO:0016793	triphosphoric monoester hydrolase activity	1	0	1	1	0.0179357	0.13227	ENSMUSG00000027639(Samhd1)	-
MF	GO:0017174	glycine N-methyltransferase activity	0	1	1	1	0.0179357	0.13227	-	ENSMUSG00000002769(Gnmt)
MF	GO:0019782	ISG15 activating enzyme activity	1	0	1	1	0.0179357	0.13227	ENSMUSG00000032596(Uba7)	-
MF	GO:0019785	ISG15-specific protease activity	1	0	1	1	0.0179357	0.13227	ENSMUSG00000030107(Usp18)	-
MF	GO:0030429	kynureninase activity	1	0	1	1	0.0179357	0.13227	ENSMUSG00000026866(Kynu)	-
MF	GO:0031707	endothelin A receptor binding	1	0	1	1	0.0179357	0.13227	ENSMUSG00000021367(Edn1)	-
MF	GO:0031774	leukotriene receptor binding	1	0	1	1	0.0179357	0.13227	ENSMUSG00000015947(Fcgr1)	-
MF	GO:0032546	deoxyribonucleoside binding	1	0	1	1	0.0179357	0.13227	ENSMUSG00000029366(Dck)	-
MF	GO:0032548	pyrimidine deoxyribonucleoside binding	1	0	1	1	0.0179357	0.13227	ENSMUSG00000029366(Dck)	-
MF	GO:0032560	guanyl deoxyribonucleotide binding	1	0	1	1	0.0179357	0.13227	ENSMUSG00000027639(Samhd1)	-
MF	GO:0032567	dGTP binding	1	0	1	1	0.0179357	0.13227	ENSMUSG00000027639(Samhd1)	-
MF	GO:0032574	5'-3' RNA helicase activity	1	0	1	1	0.0179357	0.13227	ENSMUSG00000002227(Mov10)	-
MF	GO:0033862	UMP kinase activity	1	0	1	1	0.0179357	0.13227	ENSMUSG00000020638(Cmpk2)	-
MF	GO:0035757	chemokine (C-C motif) ligand 19 binding	1	0	1	1	0.0179357	0.13227	ENSMUSG00000037944(Ccr7)	-
MF	GO:0035758	chemokine (C-C motif) ligand 21 binding	1	0	1	1	0.0179357	0.13227	ENSMUSG00000037944(Ccr7)	-
MF	GO:0038117	C-C motif chemokine 19 receptor activity	1	0	1	1	0.0179357	0.13227	ENSMUSG00000037944(Ccr7)	-
MF	GO:0038121	C-C motif chemokine 21 receptor activity	1	0	1	1	0.0179357	0.13227	ENSMUSG00000037944(Ccr7)	-
MF	GO:0042658	MHC class II protein binding, via antigen binding groove	1	0	1	1	0.0179357	0.13227	ENSMUSG00000024610(Cd74)	-
MF	GO:0045352	interleukin-1 type I receptor antagonist activity	1	0	1	1	0.0179357	0.13227	ENSMUSG00000026981(Il1rn)	-
MF	GO:0045353	interleukin-1 type II receptor antagonist activity	1	0	1	1	0.0179357	0.13227	ENSMUSG00000026981(Il1rn)	-
MF	GO:0061685	diphthine methylesterase activity	0	1	1	1	0.0179357	0.13227	-	ENSMUSG00000026975(Dph7)
MF	GO:0102076	beta,beta-carotene-9',10'-cleaving oxygenase activity	1	0	1	1	0.0179357	0.13227	ENSMUSG00000032066(Bco2)	-
BP	GO:0044270	cellular nitrogen compound catabolic process	14	0	14	406	0.0179525	0.13227	ENSMUSG00000002227(Mov10),ENSMUSG00000019979(Apaf1),ENSMUSG00000019990(Pde7b),ENSMUSG00000020464(Pnpt1),ENSMUSG00000021127(Zfp36l1),ENSMUSG00000023961(Enpp4),ENSMUSG00000026866(Kynu),ENSMUSG00000027360(Hdc),ENSMUSG00000027639(Samhd1),ENSMUSG00000028100(Nudt17),ENSMUSG00000031549(Ido2),ENSMUSG00000035208(Slfn8),ENSMUSG00000039236(Isg20),ENSMUSG00000044786(Zfp36)	-
BP	GO:0030334	regulation of cell migration	23	3	26	915	0.0179857	0.13227	ENSMUSG00000001552(Jup),ENSMUSG00000001768(Rin2),ENSMUSG00000004040(Stat3),ENSMUSG00000004698(Hdac9),ENSMUSG00000015316(Slamf1),ENSMUSG00000020717(Pecam1),ENSMUSG00000021367(Edn1),ENSMUSG00000024397(Aif1),ENSMUSG00000024610(Cd74),ENSMUSG00000026121(Sema4c),ENSMUSG00000026222(Sp100),ENSMUSG00000026581(Sell),ENSMUSG00000026981(Il1rn),ENSMUSG00000029204(Rhoh),ENSMUSG00000034855(Cxcl10),ENSMUSG000000…	ENSMUSG00000001227(Sema6b),ENSMUSG00000026883(Dab2ip),ENSMUSG00000052934(Fbxo31)
BP	GO:0045058	T cell selection	4	0	4	55	0.0180537	0.13227	ENSMUSG00000004040(Stat3),ENSMUSG00000024610(Cd74),ENSMUSG00000031712(Il15),ENSMUSG00000037944(Ccr7)	-
BP	GO:0071675	regulation of mononuclear cell migration	4	0	4	55	0.0180537	0.13227	ENSMUSG00000015316(Slamf1),ENSMUSG00000024397(Aif1),ENSMUSG00000034855(Cxcl10),ENSMUSG00000037944(Ccr7)	-
BP	GO:0002273	plasmacytoid dendritic cell differentiation	1	0	1	1	0.0182877	0.13227	ENSMUSG00000041515(Irf8)	-
BP	GO:0002472	macrophage antigen processing and presentation	1	0	1	1	0.0182877	0.13227	ENSMUSG00000039899(Fgl2)	-
BP	GO:0002616	regulation of macrophage antigen processing and presentation	1	0	1	1	0.0182877	0.13227	ENSMUSG00000039899(Fgl2)	-
BP	GO:0002617	negative regulation of macrophage antigen processing and presentation	1	0	1	1	0.0182877	0.13227	ENSMUSG00000039899(Fgl2)	-
BP	GO:0002665	negative regulation of T cell tolerance induction	1	0	1	1	0.0182877	0.13227	ENSMUSG00000022901(Cd86)	-
BP	GO:0002668	negative regulation of T cell anergy	1	0	1	1	0.0182877	0.13227	ENSMUSG00000022901(Cd86)	-
BP	GO:0002912	negative regulation of lymphocyte anergy	1	0	1	1	0.0182877	0.13227	ENSMUSG00000022901(Cd86)	-
BP	GO:0010070	zygote asymmetric cell division	1	0	1	1	0.0182877	0.13227	ENSMUSG00000052087(Rgs14)	-
BP	GO:0010982	regulation of high-density lipoprotein particle clearance	1	0	1	1	0.0182877	0.13227	ENSMUSG00000053846(Lipg)	-
BP	GO:0010983	positive regulation of high-density lipoprotein particle clearance	1	0	1	1	0.0182877	0.13227	ENSMUSG00000053846(Lipg)	-
BP	GO:0014739	positive regulation of muscle hyperplasia	1	0	1	1	0.0182877	0.13227	ENSMUSG00000024397(Aif1)	-
BP	GO:0015887	pantothenate transmembrane transport	0	1	1	1	0.0182877	0.13227	-	ENSMUSG00000006641(Slc5a6)
BP	GO:0021688	cerebellar molecular layer formation	1	0	1	1	0.0182877	0.13227	ENSMUSG00000014773(Dll1)	-
BP	GO:0032938	negative regulation of translation in response to oxidative stress	1	0	1	1	0.0182877	0.13227	ENSMUSG00000036986(Pml)	-
BP	GO:0034343	type III interferon production	1	0	1	1	0.0182877	0.13227	ENSMUSG00000031639(Tlr3)	-
BP	GO:0034344	regulation of type III interferon production	1	0	1	1	0.0182877	0.13227	ENSMUSG00000031639(Tlr3)	-
BP	GO:0034346	positive regulation of type III interferon production	1	0	1	1	0.0182877	0.13227	ENSMUSG00000031639(Tlr3)	-
BP	GO:0035340	inosine transport	1	0	1	1	0.0182877	0.13227	ENSMUSG00000027219(Slc28a2)	-
BP	GO:0038115	chemokine (C-C motif) ligand 19 signaling pathway	1	0	1	1	0.0182877	0.13227	ENSMUSG00000037944(Ccr7)	-
BP	GO:0038123	toll-like receptor TLR1:TLR2 signaling pathway	1	0	1	1	0.0182877	0.13227	ENSMUSG00000057135(Scimp)	-
BP	GO:0042313	protein kinase C deactivation	1	0	1	1	0.0182877	0.13227	ENSMUSG00000021367(Edn1)	-
BP	GO:0043179	rhythmic excitation	1	0	1	1	0.0182877	0.13227	ENSMUSG00000021367(Edn1)	-
BP	GO:0043381	negative regulation of memory T cell differentiation	1	0	1	1	0.0182877	0.13227	ENSMUSG00000039899(Fgl2)	-
BP	GO:0043556	regulation of translation in response to oxidative stress	1	0	1	1	0.0182877	0.13227	ENSMUSG00000036986(Pml)	-
BP	GO:0046901	tetrahydrofolylpolyglutamate biosynthetic process	0	1	1	1	0.0182877	0.13227	-	ENSMUSG00000009566(Fpgs)
BP	GO:0048264	determination of ventral identity	1	0	1	1	0.0182877	0.13227	ENSMUSG00000042901(Aida)	-
BP	GO:0071387	cellular response to cortisol stimulus	0	1	1	1	0.0182877	0.13227	-	ENSMUSG00000033863(Klf9)
BP	GO:0071877	regulation of adenylate cyclase-inhibiting adrenergic receptor signaling pathway	1	0	1	1	0.0182877	0.13227	ENSMUSG00000026360(Rgs2)	-
BP	GO:0086096	adenylate cyclase-inhibiting adrenergic receptor signaling pathway involved in heart process	1	0	1	1	0.0182877	0.13227	ENSMUSG00000026360(Rgs2)	-
BP	GO:0090616	mitochondrial mRNA 3'-end processing	1	0	1	1	0.0182877	0.13227	ENSMUSG00000020464(Pnpt1)	-
BP	GO:0097102	endothelial tip cell fate specification	1	0	1	1	0.0182877	0.13227	ENSMUSG00000014773(Dll1)	-
BP	GO:0097222	mitochondrial mRNA polyadenylation	1	0	1	1	0.0182877	0.13227	ENSMUSG00000020464(Pnpt1)	-
BP	GO:0097403	cellular response to raffinose	1	0	1	1	0.0182877	0.13227	ENSMUSG00000021127(Zfp36l1)	-
BP	GO:0140193	regulation of adenylate cyclase-inhibiting adrenergic receptor signaling pathway involved in heart process	1	0	1	1	0.0182877	0.13227	ENSMUSG00000026360(Rgs2)	-
BP	GO:0140194	negative regulation of adenylate cyclase-inhibiting adrenergic receptor signaling pathway involved in heart process	1	0	1	1	0.0182877	0.13227	ENSMUSG00000026360(Rgs2)	-
BP	GO:0150107	positive regulation of protein localization to cell-cell junction	1	0	1	1	0.0182877	0.13227	ENSMUSG00000020717(Pecam1)	-
BP	GO:1900073	regulation of neuromuscular synaptic transmission	1	0	1	1	0.0182877	0.13227	ENSMUSG00000002104(Rapsn)	-
BP	GO:1900075	positive regulation of neuromuscular synaptic transmission	1	0	1	1	0.0182877	0.13227	ENSMUSG00000002104(Rapsn)	-
BP	GO:1901545	response to raffinose	1	0	1	1	0.0182877	0.13227	ENSMUSG00000021127(Zfp36l1)	-
BP	GO:1901834	regulation of deadenylation-independent decapping of nuclear-transcribed mRNA	1	0	1	1	0.0182877	0.13227	ENSMUSG00000044786(Zfp36)	-
BP	GO:1901835	positive regulation of deadenylation-independent decapping of nuclear-transcribed mRNA	1	0	1	1	0.0182877	0.13227	ENSMUSG00000044786(Zfp36)	-
BP	GO:1902350	cellular response to chloroquine	1	0	1	1	0.0182877	0.13227	ENSMUSG00000045322(Tlr9)	-
BP	GO:1904246	negative regulation of polynucleotide adenylyltransferase activity	1	0	1	1	0.0182877	0.13227	ENSMUSG00000044786(Zfp36)	-
BP	GO:1904270	pyroptosome complex assembly	1	0	1	1	0.0182877	0.13227	ENSMUSG00000037860(Aim2)	-
BP	GO:1990678	histone H4-K16 deacetylation	1	0	1	1	0.0182877	0.13227	ENSMUSG00000004698(Hdac9)	-
BP	GO:2000502	negative regulation of natural killer cell chemotaxis	1	0	1	1	0.0182877	0.13227	ENSMUSG00000035352(Ccl12)	-
BP	GO:2000526	positive regulation of glycoprotein biosynthetic process involved in immunological synapse formation	1	0	1	1	0.0182877	0.13227	ENSMUSG00000037944(Ccr7)	-
BP	GO:0002475	antigen processing and presentation via MHC class Ib	3	0	3	31	0.018674	0.133134	ENSMUSG00000035929(H2-Q4),ENSMUSG00000053835(H2-T24),ENSMUSG00000056116(H2-T22)	-
BP	GO:0002828	regulation of type 2 immune response	3	0	3	31	0.018674	0.133134	ENSMUSG00000020641(Rsad2),ENSMUSG00000024610(Cd74),ENSMUSG00000048806(Ifnb1)	-
BP	GO:0050779	RNA destabilization	3	0	3	31	0.018674	0.133134	ENSMUSG00000002227(Mov10),ENSMUSG00000021127(Zfp36l1),ENSMUSG00000044786(Zfp36)	-
CC	GO:0005602	complement component C1 complex	1	0	1	1	0.0186749	0.133134	ENSMUSG00000036905(C1qb)	-
CC	GO:0016028	rhabdomere	1	0	1	1	0.0186749	0.133134	ENSMUSG00000014361(Mertk)	-
CC	GO:0031257	cell trailing edge membrane	1	0	1	1	0.0186749	0.133134	ENSMUSG00000057135(Scimp)	-
CC	GO:0031259	uropod membrane	1	0	1	1	0.0186749	0.133134	ENSMUSG00000057135(Scimp)	-
CC	GO:0035693	NOS2-CD74 complex	1	0	1	1	0.0186749	0.133134	ENSMUSG00000024610(Cd74)	-
CC	GO:0071665	gamma-catenin-TCF7L2 complex	1	0	1	1	0.0186749	0.133134	ENSMUSG00000001552(Jup)	-
CC	GO:0098745	Dcp1-Dcp2 complex	1	0	1	1	0.0186749	0.133134	ENSMUSG00000044786(Zfp36)	-
CC	GO:0150014	apical distal dendrite	1	0	1	1	0.0186749	0.133134	ENSMUSG00000015222(Map2)	-
CC	GO:1990032	parallel fiber	0	1	1	1	0.0186749	0.133134	-	ENSMUSG00000026883(Dab2ip)
MF	GO:0036312	phosphatidylinositol 3-kinase regulatory subunit binding	1	1	2	12	0.0188015	0.133558	ENSMUSG00000034573(Ptpn13)	ENSMUSG00000026883(Dab2ip)
MF	GO:0046977	TAP binding	2	0	2	12	0.0188015	0.133558	ENSMUSG00000035929(H2-Q4),ENSMUSG00000037321(Tap1)	-
MF	GO:0050700	CARD domain binding	2	0	2	12	0.0188015	0.133558	ENSMUSG00000038058(Nod1),ENSMUSG00000069874(Irgm2)	-
BP	GO:0046700	heterocycle catabolic process	14	0	14	409	0.0189946	0.134769	ENSMUSG00000002227(Mov10),ENSMUSG00000019979(Apaf1),ENSMUSG00000019990(Pde7b),ENSMUSG00000020464(Pnpt1),ENSMUSG00000021127(Zfp36l1),ENSMUSG00000023961(Enpp4),ENSMUSG00000026866(Kynu),ENSMUSG00000027360(Hdc),ENSMUSG00000027639(Samhd1),ENSMUSG00000028100(Nudt17),ENSMUSG00000031549(Ido2),ENSMUSG00000035208(Slfn8),ENSMUSG00000039236(Isg20),ENSMUSG00000044786(Zfp36)	-
BP	GO:0048247	lymphocyte chemotaxis	4	0	4	56	0.01917	0.135852	ENSMUSG00000009185(Ccl8),ENSMUSG00000034855(Cxcl10),ENSMUSG00000035352(Ccl12),ENSMUSG00000037944(Ccr7)	-
MF	GO:0032559	adenyl ribonucleotide binding	32	7	39	1545	0.0192737	0.136268	ENSMUSG00000002227(Mov10),ENSMUSG00000005237(Dnah2),ENSMUSG00000012519(Mlkl),ENSMUSG00000014361(Mertk),ENSMUSG00000017830(Dhx58),ENSMUSG00000019979(Apaf1),ENSMUSG00000020638(Cmpk2),ENSMUSG00000024079(Eif2ak2),ENSMUSG00000025324(Atp10a),ENSMUSG00000026764(Kif5c),ENSMUSG00000026773(Pfkfb3),ENSMUSG00000026896(Ifih1),ENSMUSG00000027293(Ehd4),ENSMUSG00000029366(Dck),ENSMUSG00000030275(Etnk1),ENSMUSG00…	ENSMUSG00000009566(Fpgs),ENSMUSG00000026409(Pfkfb2),ENSMUSG00000026575(Nme7),ENSMUSG00000026785(Pkn3),ENSMUSG00000027379(Bub1),ENSMUSG00000028933(Xrcc2),ENSMUSG00000032456(Nmnat3)
BP	GO:0031348	negative regulation of defense response	9	0	9	218	0.0192925	0.136268	ENSMUSG00000017830(Dhx58),ENSMUSG00000026535(Ifi202b),ENSMUSG00000026770(Il2ra),ENSMUSG00000027639(Samhd1),ENSMUSG00000037321(Tap1),ENSMUSG00000039899(Fgl2),ENSMUSG00000044786(Zfp36),ENSMUSG00000068129(Cst7),ENSMUSG00000074151(Nlrc5)	-
BP	GO:0010628	positive regulation of gene expression	48	9	57	2375	0.0194326	0.136268	ENSMUSG00000000247(Lhx2),ENSMUSG00000001552(Jup),ENSMUSG00000002307(Daxx),ENSMUSG00000004040(Stat3),ENSMUSG00000014773(Dll1),ENSMUSG00000015316(Slamf1),ENSMUSG00000017830(Dhx58),ENSMUSG00000020641(Rsad2),ENSMUSG00000021367(Edn1),ENSMUSG00000024079(Eif2ak2),ENSMUSG00000024238(Zeb1),ENSMUSG00000024397(Aif1),ENSMUSG00000024610(Cd74),ENSMUSG00000024805(Pcgf5),ENSMUSG00000025498(Irf7),ENSMUSG000000265…	ENSMUSG00000025764(Jade1),ENSMUSG00000026883(Dab2ip),ENSMUSG00000034957(Cebpa),ENSMUSG00000036867(Smad6),ENSMUSG00000038797(Zscan2),ENSMUSG00000042745(Id1),ENSMUSG00000056501(Cebpb),ENSMUSG00000071064(Zfp827),ENSMUSG00000078870(Gm14410)
BP	GO:0001787	natural killer cell proliferation	2	0	2	12	0.0195027	0.136268	ENSMUSG00000015316(Slamf1),ENSMUSG00000031712(Il15)	-
BP	GO:0002517	T cell tolerance induction	2	0	2	12	0.0195027	0.136268	ENSMUSG00000022901(Cd86),ENSMUSG00000026770(Il2ra)	-
BP	GO:0006568	tryptophan metabolic process	2	0	2	12	0.0195027	0.136268	ENSMUSG00000026866(Kynu),ENSMUSG00000031549(Ido2)	-
BP	GO:0006586	indolalkylamine metabolic process	2	0	2	12	0.0195027	0.136268	ENSMUSG00000026866(Kynu),ENSMUSG00000031549(Ido2)	-
BP	GO:0008298	intracellular mRNA localization	2	0	2	12	0.0195027	0.136268	ENSMUSG00000021127(Zfp36l1),ENSMUSG00000044786(Zfp36)	-
BP	GO:0014824	artery smooth muscle contraction	2	0	2	12	0.0195027	0.136268	ENSMUSG00000021367(Edn1),ENSMUSG00000034997(Htr2a)	-
BP	GO:0032825	positive regulation of natural killer cell differentiation	2	0	2	12	0.0195027	0.136268	ENSMUSG00000023206(Il15ra),ENSMUSG00000031712(Il15)	-
BP	GO:0034350	regulation of glial cell apoptotic process	2	0	2	12	0.0195027	0.136268	ENSMUSG00000014773(Dll1),ENSMUSG00000035352(Ccl12)	-
BP	GO:0070986	left/right axis specification	2	0	2	12	0.0195027	0.136268	ENSMUSG00000014773(Dll1),ENSMUSG00000071350(Setdb2)	-
BP	GO:0002286	T cell activation involved in immune response	6	0	6	116	0.0198871	0.138791	ENSMUSG00000004040(Stat3),ENSMUSG00000024610(Cd74),ENSMUSG00000037944(Ccr7),ENSMUSG00000039899(Fgl2),ENSMUSG00000044701(Il27),ENSMUSG00000048806(Ifnb1)	-
BP	GO:0045892	negative regulation of transcription, DNA-templated	27	9	36	1379	0.0200561	0.139807	ENSMUSG00000001156(Mxd1),ENSMUSG00000002307(Daxx),ENSMUSG00000004698(Hdac9),ENSMUSG00000006310(Zbtb32),ENSMUSG00000021367(Edn1),ENSMUSG00000024238(Zeb1),ENSMUSG00000026536(Ifi211),ENSMUSG00000027018(Hat1),ENSMUSG00000027641(Rbl1),ENSMUSG00000033871(Ppargc1b),ENSMUSG00000034765(Dusp5),ENSMUSG00000036986(Pml),ENSMUSG00000037447(Arid5a),ENSMUSG00000039989(Cbx4),ENSMUSG00000039994(Timeless),ENSMUSG00…	ENSMUSG00000026873(Phf19),ENSMUSG00000026883(Dab2ip),ENSMUSG00000030145(Zfp248),ENSMUSG00000034758(Tle6),ENSMUSG00000034957(Cebpa),ENSMUSG00000042745(Id1),ENSMUSG00000056501(Cebpb),ENSMUSG00000069272(H2ac8),ENSMUSG00000074519(Zfp971)
BP	GO:0010830	regulation of myotube differentiation	4	0	4	57	0.020328	0.140752	ENSMUSG00000009185(Ccl8),ENSMUSG00000029417(Cxcl9),ENSMUSG00000030409(Dmpk),ENSMUSG00000034855(Cxcl10)	-
BP	GO:0050873	brown fat cell differentiation	2	2	4	57	0.020328	0.140752	ENSMUSG00000026360(Rgs2),ENSMUSG00000047446(Arl4a)	ENSMUSG00000034957(Cebpa),ENSMUSG00000056501(Cebpb)
BP	GO:0006958	complement activation, classical pathway	3	0	3	32	0.0203326	0.140752	ENSMUSG00000036887(C1qa),ENSMUSG00000036905(C1qb),ENSMUSG00000073418(C4b)	-
BP	GO:0009394	2'-deoxyribonucleotide metabolic process	3	0	3	32	0.0203326	0.140752	ENSMUSG00000020638(Cmpk2),ENSMUSG00000027639(Samhd1),ENSMUSG00000029366(Dck)	-
BP	GO:0034105	positive regulation of tissue remodeling	3	0	3	32	0.0203326	0.140752	ENSMUSG00000033871(Ppargc1b),ENSMUSG00000036986(Pml),ENSMUSG00000059089(Fcgr4)	-
BP	GO:0002573	myeloid leukocyte differentiation	7	2	9	220	0.0203332	0.140752	ENSMUSG00000021127(Zfp36l1),ENSMUSG00000024610(Cd74),ENSMUSG00000031712(Il15),ENSMUSG00000033871(Ppargc1b),ENSMUSG00000037944(Ccr7),ENSMUSG00000039699(Batf2),ENSMUSG00000048806(Ifnb1)	ENSMUSG00000034957(Cebpa),ENSMUSG00000056501(Cebpb)
BP	GO:0090305	nucleic acid phosphodiester bond hydrolysis	8	2	10	257	0.0203758	0.140884	ENSMUSG00000002227(Mov10),ENSMUSG00000019979(Apaf1),ENSMUSG00000020464(Pnpt1),ENSMUSG00000027639(Samhd1),ENSMUSG00000035208(Slfn8),ENSMUSG00000039236(Isg20),ENSMUSG00000044786(Zfp36),ENSMUSG00000069793(Slfn9)	ENSMUSG00000038644(Pold1),ENSMUSG00000060152(Pop5)
BP	GO:0044772	mitotic cell cycle phase transition	7	6	13	373	0.0204471	0.141079	ENSMUSG00000000184(Ccnd2),ENSMUSG00000021127(Zfp36l1),ENSMUSG00000024397(Aif1),ENSMUSG00000027641(Rbl1),ENSMUSG00000035352(Ccl12),ENSMUSG00000036986(Pml),ENSMUSG00000078763(Slfn1)	ENSMUSG00000024056(Ndc80),ENSMUSG00000025764(Jade1),ENSMUSG00000027379(Bub1),ENSMUSG00000043866(Taf10),ENSMUSG00000052934(Fbxo31),ENSMUSG00000072082(Ccnf)
BP	GO:1903507	negative regulation of nucleic acid-templated transcription	27	9	36	1381	0.0204513	0.141079	ENSMUSG00000001156(Mxd1),ENSMUSG00000002307(Daxx),ENSMUSG00000004698(Hdac9),ENSMUSG00000006310(Zbtb32),ENSMUSG00000021367(Edn1),ENSMUSG00000024238(Zeb1),ENSMUSG00000026536(Ifi211),ENSMUSG00000027018(Hat1),ENSMUSG00000027641(Rbl1),ENSMUSG00000033871(Ppargc1b),ENSMUSG00000034765(Dusp5),ENSMUSG00000036986(Pml),ENSMUSG00000037447(Arid5a),ENSMUSG00000039989(Cbx4),ENSMUSG00000039994(Timeless),ENSMUSG00…	ENSMUSG00000026873(Phf19),ENSMUSG00000026883(Dab2ip),ENSMUSG00000030145(Zfp248),ENSMUSG00000034758(Tle6),ENSMUSG00000034957(Cebpa),ENSMUSG00000042745(Id1),ENSMUSG00000056501(Cebpb),ENSMUSG00000069272(H2ac8),ENSMUSG00000074519(Zfp971)
BP	GO:0034249	negative regulation of cellular amide metabolic process	7	0	7	150	0.0206005	0.141944	ENSMUSG00000002227(Mov10),ENSMUSG00000004040(Stat3),ENSMUSG00000021127(Zfp36l1),ENSMUSG00000024079(Eif2ak2),ENSMUSG00000026360(Rgs2),ENSMUSG00000036986(Pml),ENSMUSG00000044786(Zfp36)	-
BP	GO:1902679	negative regulation of RNA biosynthetic process	27	9	36	1382	0.0206513	0.142129	ENSMUSG00000001156(Mxd1),ENSMUSG00000002307(Daxx),ENSMUSG00000004698(Hdac9),ENSMUSG00000006310(Zbtb32),ENSMUSG00000021367(Edn1),ENSMUSG00000024238(Zeb1),ENSMUSG00000026536(Ifi211),ENSMUSG00000027018(Hat1),ENSMUSG00000027641(Rbl1),ENSMUSG00000033871(Ppargc1b),ENSMUSG00000034765(Dusp5),ENSMUSG00000036986(Pml),ENSMUSG00000037447(Arid5a),ENSMUSG00000039989(Cbx4),ENSMUSG00000039994(Timeless),ENSMUSG00…	ENSMUSG00000026873(Phf19),ENSMUSG00000026883(Dab2ip),ENSMUSG00000030145(Zfp248),ENSMUSG00000034758(Tle6),ENSMUSG00000034957(Cebpa),ENSMUSG00000042745(Id1),ENSMUSG00000056501(Cebpb),ENSMUSG00000069272(H2ac8),ENSMUSG00000074519(Zfp971)
BP	GO:0032102	negative regulation of response to external stimulus	12	1	13	374	0.0208468	0.143309	ENSMUSG00000017830(Dhx58),ENSMUSG00000024397(Aif1),ENSMUSG00000026121(Sema4c),ENSMUSG00000026535(Ifi202b),ENSMUSG00000026770(Il2ra),ENSMUSG00000027639(Samhd1),ENSMUSG00000035352(Ccl12),ENSMUSG00000037321(Tap1),ENSMUSG00000039899(Fgl2),ENSMUSG00000044786(Zfp36),ENSMUSG00000068129(Cst7),ENSMUSG00000074151(Nlrc5)	ENSMUSG00000001227(Sema6b)
MF	GO:0008144	drug binding	34	8	42	1698	0.0209179	0.143633	ENSMUSG00000002227(Mov10),ENSMUSG00000005237(Dnah2),ENSMUSG00000012519(Mlkl),ENSMUSG00000014361(Mertk),ENSMUSG00000017830(Dhx58),ENSMUSG00000019979(Apaf1),ENSMUSG00000020638(Cmpk2),ENSMUSG00000024079(Eif2ak2),ENSMUSG00000025324(Atp10a),ENSMUSG00000026764(Kif5c),ENSMUSG00000026773(Pfkfb3),ENSMUSG00000026866(Kynu),ENSMUSG00000026896(Ifih1),ENSMUSG00000027293(Ehd4),ENSMUSG00000027360(Hdc),ENSMUSG000…	ENSMUSG00000002769(Gnmt),ENSMUSG00000009566(Fpgs),ENSMUSG00000026409(Pfkfb2),ENSMUSG00000026575(Nme7),ENSMUSG00000026785(Pkn3),ENSMUSG00000027379(Bub1),ENSMUSG00000028933(Xrcc2),ENSMUSG00000032456(Nmnat3)
MF	GO:0070566	adenylyltransferase activity	2	1	3	33	0.0209776	0.143878	ENSMUSG00000032661(Oas3),ENSMUSG00000066861(Oas1g)	ENSMUSG00000032456(Nmnat3)
BP	GO:1901987	regulation of cell cycle phase transition	7	4	11	297	0.0213669	0.146379	ENSMUSG00000000184(Ccnd2),ENSMUSG00000021127(Zfp36l1),ENSMUSG00000024397(Aif1),ENSMUSG00000027641(Rbl1),ENSMUSG00000035352(Ccl12),ENSMUSG00000036986(Pml),ENSMUSG00000078763(Slfn1)	ENSMUSG00000024056(Ndc80),ENSMUSG00000025764(Jade1),ENSMUSG00000027379(Bub1),ENSMUSG00000052934(Fbxo31)
BP	GO:0033554	cellular response to stress	36	9	45	1810	0.0215187	0.14725	ENSMUSG00000002307(Daxx),ENSMUSG00000012519(Mlkl),ENSMUSG00000015316(Slamf1),ENSMUSG00000019979(Apaf1),ENSMUSG00000020415(Pttg1),ENSMUSG00000020464(Pnpt1),ENSMUSG00000021127(Zfp36l1),ENSMUSG00000021367(Edn1),ENSMUSG00000022684(Bfar),ENSMUSG00000024079(Eif2ak2),ENSMUSG00000024397(Aif1),ENSMUSG00000024610(Cd74),ENSMUSG00000026121(Sema4c),ENSMUSG00000026981(Il1rn),ENSMUSG00000027639(Samhd1),ENSMUSG0…	ENSMUSG00000016984(Etaa1),ENSMUSG00000020974(Pole2),ENSMUSG00000026883(Dab2ip),ENSMUSG00000028933(Xrcc2),ENSMUSG00000030322(Mbd4),ENSMUSG00000038065(Mturn),ENSMUSG00000038644(Pold1),ENSMUSG00000052934(Fbxo31),ENSMUSG00000056501(Cebpb)
MF	GO:0030554	adenyl nucleotide binding	32	7	39	1558	0.0216972	0.148302	ENSMUSG00000002227(Mov10),ENSMUSG00000005237(Dnah2),ENSMUSG00000012519(Mlkl),ENSMUSG00000014361(Mertk),ENSMUSG00000017830(Dhx58),ENSMUSG00000019979(Apaf1),ENSMUSG00000020638(Cmpk2),ENSMUSG00000024079(Eif2ak2),ENSMUSG00000025324(Atp10a),ENSMUSG00000026764(Kif5c),ENSMUSG00000026773(Pfkfb3),ENSMUSG00000026896(Ifih1),ENSMUSG00000027293(Ehd4),ENSMUSG00000029366(Dck),ENSMUSG00000030275(Etnk1),ENSMUSG00…	ENSMUSG00000009566(Fpgs),ENSMUSG00000026409(Pfkfb2),ENSMUSG00000026575(Nme7),ENSMUSG00000026785(Pkn3),ENSMUSG00000027379(Bub1),ENSMUSG00000028933(Xrcc2),ENSMUSG00000032456(Nmnat3)
MF	GO:0045028	G protein-coupled purinergic nucleotide receptor activity	2	0	2	13	0.0219596	0.14897	ENSMUSG00000036362(P2ry13),ENSMUSG00000036381(P2ry14)	-
MF	GO:0045236	CXCR chemokine receptor binding	2	0	2	13	0.0219596	0.14897	ENSMUSG00000029417(Cxcl9),ENSMUSG00000034855(Cxcl10)	-
BP	GO:0090501	RNA phosphodiester bond hydrolysis	6	1	7	152	0.0219662	0.14897	ENSMUSG00000002227(Mov10),ENSMUSG00000020464(Pnpt1),ENSMUSG00000027639(Samhd1),ENSMUSG00000035208(Slfn8),ENSMUSG00000039236(Isg20),ENSMUSG00000069793(Slfn9)	ENSMUSG00000060152(Pop5)
MF	GO:0016779	nucleotidyltransferase activity	4	2	6	121	0.02198	0.14897	ENSMUSG00000020464(Pnpt1),ENSMUSG00000032661(Oas3),ENSMUSG00000041827(Oasl1),ENSMUSG00000066861(Oas1g)	ENSMUSG00000032456(Nmnat3),ENSMUSG00000038644(Pold1)
MF	GO:0004620	phospholipase activity	4	1	5	89	0.0220117	0.14897	ENSMUSG00000030214(Plbd1),ENSMUSG00000033847(Pla2g4c),ENSMUSG00000053846(Lipg),ENSMUSG00000060675(Plaat3)	ENSMUSG00000027999(Pla2g12a)
MF	GO:0048018	receptor ligand activity	14	2	16	509	0.0220336	0.14897	ENSMUSG00000009185(Ccl8),ENSMUSG00000016524(Il19),ENSMUSG00000021367(Edn1),ENSMUSG00000022938(Fam3b),ENSMUSG00000026121(Sema4c),ENSMUSG00000026981(Il1rn),ENSMUSG00000029417(Cxcl9),ENSMUSG00000031712(Il15),ENSMUSG00000034855(Cxcl10),ENSMUSG00000035352(Ccl12),ENSMUSG00000039304(Tnfsf10),ENSMUSG00000044701(Il27),ENSMUSG00000048806(Ifnb1),ENSMUSG00000050957(Insl6)	ENSMUSG00000001227(Sema6b),ENSMUSG00000028539(Artn)
BP	GO:0001782	B cell homeostasis	2	1	3	33	0.0220696	0.14897	ENSMUSG00000024610(Cd74),ENSMUSG00000031628(Casp3)	ENSMUSG00000046006(Gapt)
BP	GO:0010165	response to X-ray	2	1	3	33	0.0220696	0.14897	ENSMUSG00000000184(Ccnd2),ENSMUSG00000031628(Casp3)	ENSMUSG00000028933(Xrcc2)
BP	GO:0034122	negative regulation of toll-like receptor signaling pathway	2	1	3	33	0.0220696	0.14897	ENSMUSG00000030921(Trim30a),ENSMUSG00000045322(Tlr9)	ENSMUSG00000026883(Dab2ip)
BP	GO:0050869	negative regulation of B cell activation	2	1	3	33	0.0220696	0.14897	ENSMUSG00000022876(Samsn1),ENSMUSG00000031628(Casp3)	ENSMUSG00000023915(Tnfrsf21)
BP	GO:0070266	necroptotic process	3	0	3	33	0.0220696	0.14897	ENSMUSG00000012519(Mlkl),ENSMUSG00000027514(Zbp1),ENSMUSG00000031639(Tlr3)	-
BP	GO:0051347	positive regulation of transferase activity	16	3	19	626	0.0222003	0.149683	ENSMUSG00000000184(Ccnd2),ENSMUSG00000002307(Daxx),ENSMUSG00000012519(Mlkl),ENSMUSG00000014361(Mertk),ENSMUSG00000015947(Fcgr1),ENSMUSG00000021367(Edn1),ENSMUSG00000022901(Cd86),ENSMUSG00000024079(Eif2ak2),ENSMUSG00000024610(Cd74),ENSMUSG00000026981(Il1rn),ENSMUSG00000034997(Htr2a),ENSMUSG00000037944(Ccr7),ENSMUSG00000045322(Tlr9),ENSMUSG00000062232(Rapgef2),ENSMUSG00000069874(Irgm2),ENSMUSG00000…	ENSMUSG00000016984(Etaa1),ENSMUSG00000026409(Pfkfb2),ENSMUSG00000026883(Dab2ip)
BP	GO:0044770	cell cycle phase transition	8	6	14	418	0.022397	0.150758	ENSMUSG00000000184(Ccnd2),ENSMUSG00000021127(Zfp36l1),ENSMUSG00000024397(Aif1),ENSMUSG00000027641(Rbl1),ENSMUSG00000035352(Ccl12),ENSMUSG00000036986(Pml),ENSMUSG00000039994(Timeless),ENSMUSG00000078763(Slfn1)	ENSMUSG00000024056(Ndc80),ENSMUSG00000025764(Jade1),ENSMUSG00000027379(Bub1),ENSMUSG00000043866(Taf10),ENSMUSG00000052934(Fbxo31),ENSMUSG00000072082(Ccnf)
CC	GO:0031981	nuclear lumen	71	22	93	4104	0.0224104	0.150758	ENSMUSG00000000184(Ccnd2),ENSMUSG00000000247(Lhx2),ENSMUSG00000001156(Mxd1),ENSMUSG00000002307(Daxx),ENSMUSG00000004040(Stat3),ENSMUSG00000004698(Hdac9),ENSMUSG00000006310(Zbtb32),ENSMUSG00000015222(Map2),ENSMUSG00000020638(Cmpk2),ENSMUSG00000020641(Rsad2),ENSMUSG00000024238(Zeb1),ENSMUSG00000024805(Pcgf5),ENSMUSG00000025498(Irf7),ENSMUSG00000026222(Sp100),ENSMUSG00000026360(Rgs2),ENSMUSG00000026…	ENSMUSG00000016984(Etaa1),ENSMUSG00000020974(Pole2),ENSMUSG00000024056(Ndc80),ENSMUSG00000025764(Jade1),ENSMUSG00000026409(Pfkfb2),ENSMUSG00000026873(Phf19),ENSMUSG00000027379(Bub1),ENSMUSG00000028621(Cyb5rl),ENSMUSG00000028933(Xrcc2),ENSMUSG00000030852(Tacc2),ENSMUSG00000031458(Coprs),ENSMUSG00000031671(Setd6),ENSMUSG00000033863(Klf9),ENSMUSG00000034957(Cebpa),ENSMUSG00000036867(Smad6),ENSMUSG00…
MF	GO:0003700	DNA-binding transcription factor activity	26	9	35	1372	0.0226246	0.151155	ENSMUSG00000000247(Lhx2),ENSMUSG00000001156(Mxd1),ENSMUSG00000004040(Stat3),ENSMUSG00000006310(Zbtb32),ENSMUSG00000024238(Zeb1),ENSMUSG00000025498(Irf7),ENSMUSG00000026104(Stat1),ENSMUSG00000026222(Sp100),ENSMUSG00000026536(Ifi211),ENSMUSG00000032515(Csrnp1),ENSMUSG00000039699(Batf2),ENSMUSG00000041515(Irf8),ENSMUSG00000041649(Klf8),ENSMUSG00000043263(Ifi209),ENSMUSG00000052477(C130026I21Rik),ENS…	ENSMUSG00000030145(Zfp248),ENSMUSG00000034800(Zfp661),ENSMUSG00000034957(Cebpa),ENSMUSG00000038797(Zscan2),ENSMUSG00000056501(Cebpb),ENSMUSG00000069206(Zfp874a),ENSMUSG00000070822(Zscan18),ENSMUSG00000074519(Zfp971),ENSMUSG00000078870(Gm14410)
BP	GO:0002548	monocyte chemotaxis	4	0	4	59	0.0227708	0.151155	ENSMUSG00000009185(Ccl8),ENSMUSG00000024397(Aif1),ENSMUSG00000034855(Cxcl10),ENSMUSG00000035352(Ccl12)	-
BP	GO:0001660	fever generation	2	0	2	13	0.0227734	0.151155	ENSMUSG00000026981(Il1rn),ENSMUSG00000079227(Ccr5)	-
BP	GO:0002756	MyD88-independent toll-like receptor signaling pathway	2	0	2	13	0.0227734	0.151155	ENSMUSG00000025498(Irf7),ENSMUSG00000031639(Tlr3)	-
BP	GO:0002903	negative regulation of B cell apoptotic process	2	0	2	13	0.0227734	0.151155	ENSMUSG00000024610(Cd74),ENSMUSG00000062007(Hsh2d)	-
BP	GO:0006000	fructose metabolic process	1	1	2	13	0.0227734	0.151155	ENSMUSG00000026773(Pfkfb3)	ENSMUSG00000026409(Pfkfb2)
BP	GO:0009263	deoxyribonucleotide biosynthetic process	2	0	2	13	0.0227734	0.151155	ENSMUSG00000020638(Cmpk2),ENSMUSG00000029366(Dck)	-
BP	GO:0032604	granulocyte macrophage colony-stimulating factor production	2	0	2	13	0.0227734	0.151155	ENSMUSG00000040296(Ddx58),ENSMUSG00000045322(Tlr9)	-
BP	GO:0032645	regulation of granulocyte macrophage colony-stimulating factor production	2	0	2	13	0.0227734	0.151155	ENSMUSG00000040296(Ddx58),ENSMUSG00000045322(Tlr9)	-
BP	GO:0035589	G protein-coupled purinergic nucleotide receptor signaling pathway	2	0	2	13	0.0227734	0.151155	ENSMUSG00000036362(P2ry13),ENSMUSG00000036381(P2ry14)	-
BP	GO:0038094	Fc-gamma receptor signaling pathway	2	0	2	13	0.0227734	0.151155	ENSMUSG00000015947(Fcgr1),ENSMUSG00000059089(Fcgr4)	-
BP	GO:1901096	regulation of autophagosome maturation	2	0	2	13	0.0227734	0.151155	ENSMUSG00000046879(Irgm1),ENSMUSG00000069874(Irgm2)	-
BP	GO:0009890	negative regulation of biosynthetic process	33	9	42	1675	0.0229506	0.152162	ENSMUSG00000001156(Mxd1),ENSMUSG00000002227(Mov10),ENSMUSG00000002307(Daxx),ENSMUSG00000004040(Stat3),ENSMUSG00000004698(Hdac9),ENSMUSG00000006310(Zbtb32),ENSMUSG00000021127(Zfp36l1),ENSMUSG00000021367(Edn1),ENSMUSG00000024079(Eif2ak2),ENSMUSG00000024238(Zeb1),ENSMUSG00000026360(Rgs2),ENSMUSG00000026536(Ifi211),ENSMUSG00000027018(Hat1),ENSMUSG00000027641(Rbl1),ENSMUSG00000033871(Ppargc1b),ENSMUSG…	ENSMUSG00000026873(Phf19),ENSMUSG00000026883(Dab2ip),ENSMUSG00000030145(Zfp248),ENSMUSG00000034758(Tle6),ENSMUSG00000034957(Cebpa),ENSMUSG00000042745(Id1),ENSMUSG00000056501(Cebpb),ENSMUSG00000069272(H2ac8),ENSMUSG00000074519(Zfp971)
MF	GO:0030545	receptor regulator activity	15	2	17	555	0.0232231	0.153798	ENSMUSG00000009185(Ccl8),ENSMUSG00000016524(Il19),ENSMUSG00000021367(Edn1),ENSMUSG00000022938(Fam3b),ENSMUSG00000026121(Sema4c),ENSMUSG00000026981(Il1rn),ENSMUSG00000029417(Cxcl9),ENSMUSG00000031712(Il15),ENSMUSG00000034855(Cxcl10),ENSMUSG00000035352(Ccl12),ENSMUSG00000039304(Tnfsf10),ENSMUSG00000044701(Il27),ENSMUSG00000048806(Ifnb1),ENSMUSG00000050957(Insl6),ENSMUSG00000075602(Ly6a)	ENSMUSG00000001227(Sema6b),ENSMUSG00000028539(Artn)
CC	GO:0043596	nuclear replication fork	1	2	3	33	0.023305	0.154018	ENSMUSG00000039994(Timeless)	ENSMUSG00000016984(Etaa1),ENSMUSG00000038644(Pold1)
MF	GO:0016788	hydrolase activity, acting on ester bonds	16	5	21	730	0.0233078	0.154018	ENSMUSG00000019990(Pde7b),ENSMUSG00000020464(Pnpt1),ENSMUSG00000026773(Pfkfb3),ENSMUSG00000027639(Samhd1),ENSMUSG00000029780(Nt5c3),ENSMUSG00000030214(Plbd1),ENSMUSG00000030671(Pde3b),ENSMUSG00000033847(Pla2g4c),ENSMUSG00000034573(Ptpn13),ENSMUSG00000034765(Dusp5),ENSMUSG00000035208(Slfn8),ENSMUSG00000037826(Ppm1k),ENSMUSG00000039236(Isg20),ENSMUSG00000053846(Lipg),ENSMUSG00000060675(Plaat3),ENSM…	ENSMUSG00000026409(Pfkfb2),ENSMUSG00000026975(Dph7),ENSMUSG00000027999(Pla2g12a),ENSMUSG00000038644(Pold1),ENSMUSG00000060152(Pop5)
BP	GO:0002706	regulation of lymphocyte mediated immunity	7	0	7	154	0.0233934	0.154412	ENSMUSG00000015316(Slamf1),ENSMUSG00000015947(Fcgr1),ENSMUSG00000020641(Rsad2),ENSMUSG00000030149(Klrk1),ENSMUSG00000037321(Tap1),ENSMUSG00000037447(Arid5a),ENSMUSG00000048806(Ifnb1)	-
MF	GO:0030234	enzyme regulator activity	22	5	27	1002	0.0234959	0.154917	ENSMUSG00000000184(Ccnd2),ENSMUSG00000001768(Rin2),ENSMUSG00000002307(Daxx),ENSMUSG00000019979(Apaf1),ENSMUSG00000020415(Pttg1),ENSMUSG00000020709(Adap2),ENSMUSG00000023903(Mmp25),ENSMUSG00000026358(Rgs1),ENSMUSG00000026360(Rgs2),ENSMUSG00000029204(Rhoh),ENSMUSG00000030409(Dmpk),ENSMUSG00000030560(Ctsc),ENSMUSG00000031628(Casp3),ENSMUSG00000036995(Asap3),ENSMUSG00000052087(Rgs14),ENSMUSG000000547…	ENSMUSG00000000983(Wfdc18),ENSMUSG00000016984(Etaa1),ENSMUSG00000026883(Dab2ip),ENSMUSG00000039831(Arhgap29),ENSMUSG00000072082(Ccnf)
CC	GO:0000940	condensed chromosome outer kinetochore	0	2	2	13	0.0236825	0.155975	-	ENSMUSG00000024056(Ndc80),ENSMUSG00000027379(Bub1)
MF	GO:0030546	signaling receptor activator activity	14	2	16	514	0.0238537	0.156618	ENSMUSG00000009185(Ccl8),ENSMUSG00000016524(Il19),ENSMUSG00000021367(Edn1),ENSMUSG00000022938(Fam3b),ENSMUSG00000026121(Sema4c),ENSMUSG00000026981(Il1rn),ENSMUSG00000029417(Cxcl9),ENSMUSG00000031712(Il15),ENSMUSG00000034855(Cxcl10),ENSMUSG00000035352(Ccl12),ENSMUSG00000039304(Tnfsf10),ENSMUSG00000044701(Il27),ENSMUSG00000048806(Ifnb1),ENSMUSG00000050957(Insl6)	ENSMUSG00000001227(Sema6b),ENSMUSG00000028539(Artn)
BP	GO:0010837	regulation of keratinocyte proliferation	2	1	3	34	0.0238852	0.156618	ENSMUSG00000021127(Zfp36l1),ENSMUSG00000044786(Zfp36)	ENSMUSG00000033863(Klf9)
BP	GO:0019692	deoxyribose phosphate metabolic process	3	0	3	34	0.0238852	0.156618	ENSMUSG00000020638(Cmpk2),ENSMUSG00000027639(Samhd1),ENSMUSG00000029366(Dck)	-
BP	GO:2000406	positive regulation of T cell migration	3	0	3	34	0.0238852	0.156618	ENSMUSG00000024397(Aif1),ENSMUSG00000034855(Cxcl10),ENSMUSG00000037944(Ccr7)	-
BP	GO:0030308	negative regulation of cell growth	6	2	8	190	0.0239691	0.156996	ENSMUSG00000015222(Map2),ENSMUSG00000026121(Sema4c),ENSMUSG00000026360(Rgs2),ENSMUSG00000036986(Pml),ENSMUSG00000055200(Sertad3),ENSMUSG00000079227(Ccr5)	ENSMUSG00000001227(Sema6b),ENSMUSG00000026883(Dab2ip)
BP	GO:0043433	negative regulation of DNA-binding transcription factor activity	3	4	7	155	0.0241304	0.157879	ENSMUSG00000037860(Aim2),ENSMUSG00000045322(Tlr9),ENSMUSG00000074151(Nlrc5)	ENSMUSG00000026883(Dab2ip),ENSMUSG00000031671(Setd6),ENSMUSG00000038065(Mturn),ENSMUSG00000042745(Id1)
BP	GO:1901564	organonitrogen compound metabolic process	108	28	136	6439	0.0242891	0.158744	ENSMUSG00000000184(Ccnd2),ENSMUSG00000002227(Mov10),ENSMUSG00000002307(Daxx),ENSMUSG00000004040(Stat3),ENSMUSG00000004698(Hdac9),ENSMUSG00000009185(Ccl8),ENSMUSG00000012519(Mlkl),ENSMUSG00000014361(Mertk),ENSMUSG00000015316(Slamf1),ENSMUSG00000015947(Fcgr1),ENSMUSG00000019979(Apaf1),ENSMUSG00000019990(Pde7b),ENSMUSG00000020415(Pttg1),ENSMUSG00000020638(Cmpk2),ENSMUSG00000020717(Pecam1),ENSMUSG000…	ENSMUSG00000000983(Wfdc18),ENSMUSG00000002769(Gnmt),ENSMUSG00000006442(Srm),ENSMUSG00000009566(Fpgs),ENSMUSG00000016984(Etaa1),ENSMUSG00000022474(Pmm1),ENSMUSG00000025764(Jade1),ENSMUSG00000026409(Pfkfb2),ENSMUSG00000026575(Nme7),ENSMUSG00000026785(Pkn3),ENSMUSG00000026873(Phf19),ENSMUSG00000026883(Dab2ip),ENSMUSG00000026975(Dph7),ENSMUSG00000027379(Bub1),ENSMUSG00000031458(Coprs),ENSMUSG00000031…
MF	GO:0019956	chemokine binding	3	0	3	35	0.024516	0.160051	ENSMUSG00000037944(Ccr7),ENSMUSG00000044786(Zfp36),ENSMUSG00000079227(Ccr5)	-
BP	GO:0018212	peptidyl-tyrosine modification	13	0	13	383	0.024711	0.161148	ENSMUSG00000014361(Mertk),ENSMUSG00000015947(Fcgr1),ENSMUSG00000020717(Pecam1),ENSMUSG00000022876(Samsn1),ENSMUSG00000024079(Eif2ak2),ENSMUSG00000024610(Cd74),ENSMUSG00000027293(Ehd4),ENSMUSG00000031712(Il15),ENSMUSG00000034118(Tpst1),ENSMUSG00000034997(Htr2a),ENSMUSG00000035683(Melk),ENSMUSG00000062960(Kdr),ENSMUSG00000074570(Cass4)	-
BP	GO:0043406	positive regulation of MAP kinase activity	8	1	9	228	0.024903	0.162223	ENSMUSG00000012519(Mlkl),ENSMUSG00000021367(Edn1),ENSMUSG00000024079(Eif2ak2),ENSMUSG00000024610(Cd74),ENSMUSG00000026981(Il1rn),ENSMUSG00000034997(Htr2a),ENSMUSG00000037944(Ccr7),ENSMUSG00000045322(Tlr9)	ENSMUSG00000026883(Dab2ip)
MF	GO:0005524	ATP binding	30	7	37	1479	0.0252274	0.164157	ENSMUSG00000002227(Mov10),ENSMUSG00000005237(Dnah2),ENSMUSG00000012519(Mlkl),ENSMUSG00000014361(Mertk),ENSMUSG00000017830(Dhx58),ENSMUSG00000019979(Apaf1),ENSMUSG00000020638(Cmpk2),ENSMUSG00000024079(Eif2ak2),ENSMUSG00000025324(Atp10a),ENSMUSG00000026764(Kif5c),ENSMUSG00000026773(Pfkfb3),ENSMUSG00000026896(Ifih1),ENSMUSG00000027293(Ehd4),ENSMUSG00000029366(Dck),ENSMUSG00000030275(Etnk1),ENSMUSG00…	ENSMUSG00000009566(Fpgs),ENSMUSG00000026409(Pfkfb2),ENSMUSG00000026575(Nme7),ENSMUSG00000026785(Pkn3),ENSMUSG00000027379(Bub1),ENSMUSG00000028933(Xrcc2),ENSMUSG00000032456(Nmnat3)
MF	GO:0000981	DNA-binding transcription factor activity, RNA polymerase II-specific	24	9	33	1289	0.0252911	0.164221	ENSMUSG00000000247(Lhx2),ENSMUSG00000001156(Mxd1),ENSMUSG00000004040(Stat3),ENSMUSG00000006310(Zbtb32),ENSMUSG00000024238(Zeb1),ENSMUSG00000025498(Irf7),ENSMUSG00000026222(Sp100),ENSMUSG00000026536(Ifi211),ENSMUSG00000032515(Csrnp1),ENSMUSG00000039699(Batf2),ENSMUSG00000041515(Irf8),ENSMUSG00000041649(Klf8),ENSMUSG00000043263(Ifi209),ENSMUSG00000052477(C130026I21Rik),ENSMUSG00000052760(A630001G21…	ENSMUSG00000030145(Zfp248),ENSMUSG00000034800(Zfp661),ENSMUSG00000034957(Cebpa),ENSMUSG00000038797(Zscan2),ENSMUSG00000056501(Cebpb),ENSMUSG00000069206(Zfp874a),ENSMUSG00000070822(Zscan18),ENSMUSG00000074519(Zfp971),ENSMUSG00000078870(Gm14410)
MF	GO:0016505	peptidase activator activity involved in apoptotic process	2	0	2	14	0.0253199	0.164221	ENSMUSG00000019979(Apaf1),ENSMUSG00000030560(Ctsc)	-
MF	GO:0140035	ubiquitination-like modification-dependent protein binding	2	0	2	14	0.0253199	0.164221	ENSMUSG00000002307(Daxx),ENSMUSG00000036986(Pml)	-
BP	GO:0030888	regulation of B cell proliferation	3	1	4	61	0.0253849	0.164289	ENSMUSG00000024610(Cd74),ENSMUSG00000031628(Casp3),ENSMUSG00000045322(Tlr9)	ENSMUSG00000023915(Tnfrsf21)
MF	GO:0140110	transcription regulator activity	32	12	44	1818	0.0253853	0.164289	ENSMUSG00000000247(Lhx2),ENSMUSG00000001156(Mxd1),ENSMUSG00000001552(Jup),ENSMUSG00000002307(Daxx),ENSMUSG00000004040(Stat3),ENSMUSG00000006310(Zbtb32),ENSMUSG00000024238(Zeb1),ENSMUSG00000025498(Irf7),ENSMUSG00000026104(Stat1),ENSMUSG00000026222(Sp100),ENSMUSG00000026536(Ifi211),ENSMUSG00000032515(Csrnp1),ENSMUSG00000033871(Ppargc1b),ENSMUSG00000036986(Pml),ENSMUSG00000037447(Arid5a),ENSMUSG0000…	ENSMUSG00000025764(Jade1),ENSMUSG00000030145(Zfp248),ENSMUSG00000034758(Tle6),ENSMUSG00000034800(Zfp661),ENSMUSG00000034957(Cebpa),ENSMUSG00000038797(Zscan2),ENSMUSG00000043866(Taf10),ENSMUSG00000056501(Cebpb),ENSMUSG00000069206(Zfp874a),ENSMUSG00000070822(Zscan18),ENSMUSG00000074519(Zfp971),ENSMUSG00000078870(Gm14410)
BP	GO:0019439	aromatic compound catabolic process	14	0	14	426	0.025788	0.166553	ENSMUSG00000002227(Mov10),ENSMUSG00000019979(Apaf1),ENSMUSG00000019990(Pde7b),ENSMUSG00000020464(Pnpt1),ENSMUSG00000021127(Zfp36l1),ENSMUSG00000023961(Enpp4),ENSMUSG00000026866(Kynu),ENSMUSG00000027360(Hdc),ENSMUSG00000027639(Samhd1),ENSMUSG00000028100(Nudt17),ENSMUSG00000031549(Ido2),ENSMUSG00000035208(Slfn8),ENSMUSG00000039236(Isg20),ENSMUSG00000044786(Zfp36)	-
BP	GO:0045445	myoblast differentiation	5	0	5	91	0.025791	0.166553	ENSMUSG00000009185(Ccl8),ENSMUSG00000014773(Dll1),ENSMUSG00000021127(Zfp36l1),ENSMUSG00000029417(Cxcl9),ENSMUSG00000034855(Cxcl10)	-
BP	GO:0002524	hypersensitivity	2	0	2	14	0.0262521	0.167895	ENSMUSG00000015947(Fcgr1),ENSMUSG00000037944(Ccr7)	-
BP	GO:0010826	negative regulation of centrosome duplication	1	1	2	14	0.0262521	0.167895	ENSMUSG00000049488(Tmem67)	ENSMUSG00000072082(Ccnf)
BP	GO:0014820	tonic smooth muscle contraction	2	0	2	14	0.0262521	0.167895	ENSMUSG00000021367(Edn1),ENSMUSG00000034997(Htr2a)	-
BP	GO:0042402	cellular biogenic amine catabolic process	2	0	2	14	0.0262521	0.167895	ENSMUSG00000026866(Kynu),ENSMUSG00000031549(Ido2)	-
BP	GO:0045060	negative thymic T cell selection	2	0	2	14	0.0262521	0.167895	ENSMUSG00000024610(Cd74),ENSMUSG00000037944(Ccr7)	-
BP	GO:0045647	negative regulation of erythrocyte differentiation	2	0	2	14	0.0262521	0.167895	ENSMUSG00000021127(Zfp36l1),ENSMUSG00000044786(Zfp36)	-
BP	GO:0060339	negative regulation of type I interferon-mediated signaling pathway	2	0	2	14	0.0262521	0.167895	ENSMUSG00000027639(Samhd1),ENSMUSG00000074151(Nlrc5)	-
BP	GO:0072672	neutrophil extravasation	2	0	2	14	0.0262521	0.167895	ENSMUSG00000020717(Pecam1),ENSMUSG00000048534(Jaml)	-
BP	GO:2001212	regulation of vasculogenesis	2	0	2	14	0.0262521	0.167895	ENSMUSG00000001768(Rin2),ENSMUSG00000062232(Rapgef2)	-
MF	GO:0005096	GTPase activator activity	7	2	9	235	0.0264498	0.168979	ENSMUSG00000001768(Rin2),ENSMUSG00000020709(Adap2),ENSMUSG00000026358(Rgs1),ENSMUSG00000026360(Rgs2),ENSMUSG00000036995(Asap3),ENSMUSG00000052087(Rgs14),ENSMUSG00000062232(Rapgef2)	ENSMUSG00000026883(Dab2ip),ENSMUSG00000039831(Arhgap29)
BP	GO:0006139	nucleobase-containing compound metabolic process	84	32	116	5411	0.0267016	0.170393	ENSMUSG00000000247(Lhx2),ENSMUSG00000001156(Mxd1),ENSMUSG00000001552(Jup),ENSMUSG00000002227(Mov10),ENSMUSG00000002307(Daxx),ENSMUSG00000004040(Stat3),ENSMUSG00000004698(Hdac9),ENSMUSG00000006310(Zbtb32),ENSMUSG00000014773(Dll1),ENSMUSG00000019979(Apaf1),ENSMUSG00000019990(Pde7b),ENSMUSG00000020415(Pttg1),ENSMUSG00000020464(Pnpt1),ENSMUSG00000020638(Cmpk2),ENSMUSG00000021127(Zfp36l1),ENSMUSG00000…	ENSMUSG00000002769(Gnmt),ENSMUSG00000016984(Etaa1),ENSMUSG00000020974(Pole2),ENSMUSG00000022474(Pmm1),ENSMUSG00000025764(Jade1),ENSMUSG00000026409(Pfkfb2),ENSMUSG00000026575(Nme7),ENSMUSG00000026873(Phf19),ENSMUSG00000026883(Dab2ip),ENSMUSG00000028933(Xrcc2),ENSMUSG00000030145(Zfp248),ENSMUSG00000030322(Mbd4),ENSMUSG00000031671(Setd6),ENSMUSG00000032456(Nmnat3),ENSMUSG00000034758(Tle6),ENSMUSG000…
BP	GO:0046128	purine ribonucleoside metabolic process	2	2	4	62	0.0267568	0.170393	ENSMUSG00000023961(Enpp4),ENSMUSG00000029780(Nt5c3)	ENSMUSG00000002769(Gnmt),ENSMUSG00000026575(Nme7)
BP	GO:2000401	regulation of lymphocyte migration	4	0	4	62	0.0267568	0.170393	ENSMUSG00000024397(Aif1),ENSMUSG00000034855(Cxcl10),ENSMUSG00000035352(Ccl12),ENSMUSG00000037944(Ccr7)	-
BP	GO:1904035	regulation of epithelial cell apoptotic process	5	0	5	92	0.0268792	0.17099	ENSMUSG00000021127(Zfp36l1),ENSMUSG00000035352(Ccl12),ENSMUSG00000044786(Zfp36),ENSMUSG00000054580(Pla2r1),ENSMUSG00000062960(Kdr)	-
BP	GO:0007346	regulation of mitotic cell cycle	11	4	15	470	0.02699	0.171511	ENSMUSG00000000184(Ccnd2),ENSMUSG00000020415(Pttg1),ENSMUSG00000020464(Pnpt1),ENSMUSG00000021127(Zfp36l1),ENSMUSG00000021367(Edn1),ENSMUSG00000024397(Aif1),ENSMUSG00000024887(Asah2),ENSMUSG00000027641(Rbl1),ENSMUSG00000035352(Ccl12),ENSMUSG00000036986(Pml),ENSMUSG00000078763(Slfn1)	ENSMUSG00000024056(Ndc80),ENSMUSG00000025764(Jade1),ENSMUSG00000027379(Bub1),ENSMUSG00000052934(Fbxo31)
CC	GO:0005576	extracellular region	52	8	60	2514	0.0271726	0.172488	ENSMUSG00000001128(Cfp),ENSMUSG00000003617(Cp),ENSMUSG00000009185(Ccl8),ENSMUSG00000010358(Ifi35),ENSMUSG00000014361(Mertk),ENSMUSG00000016524(Il19),ENSMUSG00000020717(Pecam1),ENSMUSG00000021367(Edn1),ENSMUSG00000021423(Ly86),ENSMUSG00000022901(Cd86),ENSMUSG00000022938(Fam3b),ENSMUSG00000023206(Il15ra),ENSMUSG00000023903(Mmp25),ENSMUSG00000024610(Cd74),ENSMUSG00000024887(Asah2),ENSMUSG00000026121…	ENSMUSG00000000983(Wfdc18),ENSMUSG00000001227(Sema6b),ENSMUSG00000004105(Angptl2),ENSMUSG00000027999(Pla2g12a),ENSMUSG00000028539(Artn),ENSMUSG00000037098(Rab11fip3),ENSMUSG00000050967(Creg2),ENSMUSG00000055485(Soga1)
MF	GO:0003690	double-stranded DNA binding	29	10	39	1584	0.0272721	0.172936	ENSMUSG00000000247(Lhx2),ENSMUSG00000001156(Mxd1),ENSMUSG00000004040(Stat3),ENSMUSG00000006310(Zbtb32),ENSMUSG00000024238(Zeb1),ENSMUSG00000025498(Irf7),ENSMUSG00000026535(Ifi202b),ENSMUSG00000026536(Ifi211),ENSMUSG00000027514(Zbp1),ENSMUSG00000027641(Rbl1),ENSMUSG00000034640(Tiparp),ENSMUSG00000037447(Arid5a),ENSMUSG00000037860(Aim2),ENSMUSG00000037921(Ddx60),ENSMUSG00000039699(Batf2),ENSMUSG000…	ENSMUSG00000030145(Zfp248),ENSMUSG00000034800(Zfp661),ENSMUSG00000034957(Cebpa),ENSMUSG00000036867(Smad6),ENSMUSG00000038797(Zscan2),ENSMUSG00000056501(Cebpb),ENSMUSG00000069206(Zfp874a),ENSMUSG00000070822(Zscan18),ENSMUSG00000074519(Zfp971),ENSMUSG00000078870(Gm14410)
BP	GO:0071901	negative regulation of protein serine/threonine kinase activity	5	1	6	125	0.0274854	0.174104	ENSMUSG00000026360(Rgs2),ENSMUSG00000031628(Casp3),ENSMUSG00000034765(Dusp5),ENSMUSG00000042901(Aida),ENSMUSG00000052087(Rgs14)	ENSMUSG00000026883(Dab2ip)
BP	GO:0007257	activation of JUN kinase activity	2	1	3	36	0.0277513	0.175044	ENSMUSG00000012519(Mlkl),ENSMUSG00000037944(Ccr7)	ENSMUSG00000026883(Dab2ip)
BP	GO:0009072	aromatic amino acid family metabolic process	3	0	3	36	0.0277513	0.175044	ENSMUSG00000026866(Kynu),ENSMUSG00000027360(Hdc),ENSMUSG00000031549(Ido2)	-
BP	GO:0009262	deoxyribonucleotide metabolic process	3	0	3	36	0.0277513	0.175044	ENSMUSG00000020638(Cmpk2),ENSMUSG00000027639(Samhd1),ENSMUSG00000029366(Dck)	-
BP	GO:0034142	toll-like receptor 4 signaling pathway	2	1	3	36	0.0277513	0.175044	ENSMUSG00000010358(Ifi35),ENSMUSG00000057135(Scimp)	ENSMUSG00000026883(Dab2ip)
BP	GO:0042326	negative regulation of phosphorylation	13	2	15	473	0.0283319	0.178518	ENSMUSG00000004040(Stat3),ENSMUSG00000020717(Pecam1),ENSMUSG00000022876(Samsn1),ENSMUSG00000026360(Rgs2),ENSMUSG00000029204(Rhoh),ENSMUSG00000031628(Casp3),ENSMUSG00000034573(Ptpn13),ENSMUSG00000034765(Dusp5),ENSMUSG00000042901(Aida),ENSMUSG00000052087(Rgs14),ENSMUSG00000078763(Slfn1),ENSMUSG00000079363(Gbp4),ENSMUSG00000117975(Itprip)	ENSMUSG00000026883(Dab2ip),ENSMUSG00000036867(Smad6)
BP	GO:0050864	regulation of B cell activation	5	1	6	126	0.028433	0.178966	ENSMUSG00000021127(Zfp36l1),ENSMUSG00000022876(Samsn1),ENSMUSG00000024610(Cd74),ENSMUSG00000031628(Casp3),ENSMUSG00000045322(Tlr9)	ENSMUSG00000023915(Tnfrsf21)
CC	GO:0012505	endomembrane system	79	11	90	3997	0.0286807	0.180335	ENSMUSG00000000184(Ccnd2),ENSMUSG00000001128(Cfp),ENSMUSG00000002104(Rapsn),ENSMUSG00000015222(Map2),ENSMUSG00000015377(Dennd6b),ENSMUSG00000020464(Pnpt1),ENSMUSG00000020641(Rsad2),ENSMUSG00000021263(Degs2),ENSMUSG00000021364(Elovl2),ENSMUSG00000021367(Edn1),ENSMUSG00000022684(Bfar),ENSMUSG00000022938(Fam3b),ENSMUSG00000023206(Il15ra),ENSMUSG00000023307(Marchf5),ENSMUSG00000024610(Cd74),ENSMUSG00…	ENSMUSG00000022621(Rabl2),ENSMUSG00000025931(Paqr8),ENSMUSG00000027999(Pla2g12a),ENSMUSG00000036867(Smad6),ENSMUSG00000037098(Rab11fip3),ENSMUSG00000038074(Fkbp14),ENSMUSG00000038126(Mphosph9),ENSMUSG00000042745(Id1),ENSMUSG00000046006(Gapt),ENSMUSG00000049411(Tmem241),ENSMUSG00000050967(Creg2)
BP	GO:0051961	negative regulation of nervous system development	9	3	12	351	0.028792	0.180844	ENSMUSG00000000247(Lhx2),ENSMUSG00000004040(Stat3),ENSMUSG00000014773(Dll1),ENSMUSG00000015222(Map2),ENSMUSG00000023206(Il15ra),ENSMUSG00000026121(Sema4c),ENSMUSG00000030560(Ctsc),ENSMUSG00000062232(Rapgef2),ENSMUSG00000079227(Ccr5)	ENSMUSG00000001227(Sema6b),ENSMUSG00000023915(Tnfrsf21),ENSMUSG00000042745(Id1)
MF	GO:0005149	interleukin-1 receptor binding	2	0	2	15	0.028874	0.180978	ENSMUSG00000026981(Il1rn),ENSMUSG00000045322(Tlr9)	-
MF	GO:1990404	protein ADP-ribosylase activity	2	0	2	15	0.028874	0.180978	ENSMUSG00000034640(Tiparp),ENSMUSG00000037997(Parp11)	-
BP	GO:0002456	T cell mediated immunity	5	0	5	94	0.0291424	0.182469	ENSMUSG00000015316(Slamf1),ENSMUSG00000020641(Rsad2),ENSMUSG00000030560(Ctsc),ENSMUSG00000037447(Arid5a),ENSMUSG00000048806(Ifnb1)	-
BP	GO:0014065	phosphatidylinositol 3-kinase signaling	5	1	6	127	0.0294019	0.1839	ENSMUSG00000021127(Zfp36l1),ENSMUSG00000021367(Edn1),ENSMUSG00000034573(Ptpn13),ENSMUSG00000034997(Htr2a),ENSMUSG00000062960(Kdr)	ENSMUSG00000026883(Dab2ip)
BP	GO:0001773	myeloid dendritic cell activation	3	0	3	37	0.0298015	0.185455	ENSMUSG00000015316(Slamf1),ENSMUSG00000030149(Klrk1),ENSMUSG00000039699(Batf2)	-
BP	GO:0009310	amine catabolic process	2	0	2	15	0.0299302	0.185455	ENSMUSG00000026866(Kynu),ENSMUSG00000031549(Ido2)	-
BP	GO:0023035	CD40 signaling pathway	2	0	2	15	0.0299302	0.185455	ENSMUSG00000015316(Slamf1),ENSMUSG00000022901(Cd86)	-
BP	GO:0043383	negative T cell selection	2	0	2	15	0.0299302	0.185455	ENSMUSG00000024610(Cd74),ENSMUSG00000037944(Ccr7)	-
BP	GO:0046606	negative regulation of centrosome cycle	1	1	2	15	0.0299302	0.185455	ENSMUSG00000049488(Tmem67)	ENSMUSG00000072082(Ccnf)
BP	GO:0060192	negative regulation of lipase activity	2	0	2	15	0.0299302	0.185455	ENSMUSG00000004698(Hdac9),ENSMUSG00000026360(Rgs2)	-
BP	GO:0070207	protein homotrimerization	2	0	2	15	0.0299302	0.185455	ENSMUSG00000012519(Mlkl),ENSMUSG00000020464(Pnpt1)	-
BP	GO:1900225	regulation of NLRP3 inflammasome complex assembly	2	0	2	15	0.0299302	0.185455	ENSMUSG00000024079(Eif2ak2),ENSMUSG00000030921(Trim30a)	-
BP	GO:1903978	regulation of microglial cell activation	2	0	2	15	0.0299302	0.185455	ENSMUSG00000030560(Ctsc),ENSMUSG00000068129(Cst7)	-
MF	GO:0003723	RNA binding	29	1	30	1165	0.0299922	0.185647	ENSMUSG00000002227(Mov10),ENSMUSG00000004040(Stat3),ENSMUSG00000017830(Dhx58),ENSMUSG00000020464(Pnpt1),ENSMUSG00000021127(Zfp36l1),ENSMUSG00000024079(Eif2ak2),ENSMUSG00000026896(Ifih1),ENSMUSG00000027514(Zbp1),ENSMUSG00000027639(Samhd1),ENSMUSG00000029814(Igf2bp3),ENSMUSG00000031639(Tlr3),ENSMUSG00000032661(Oas3),ENSMUSG00000033871(Ppargc1b),ENSMUSG00000034459(Ifit1),ENSMUSG00000035208(Slfn8),EN…	ENSMUSG00000060152(Pop5)
BP	GO:0045582	positive regulation of T cell differentiation	5	0	5	95	0.0303178	0.187468	ENSMUSG00000024610(Cd74),ENSMUSG00000026770(Il2ra),ENSMUSG00000029204(Rhoh),ENSMUSG00000036594(H2-Aa),ENSMUSG00000037944(Ccr7)	-
BP	GO:0003158	endothelium development	5	1	6	128	0.0303922	0.187733	ENSMUSG00000014773(Dll1),ENSMUSG00000020717(Pecam1),ENSMUSG00000024238(Zeb1),ENSMUSG00000034855(Cxcl10),ENSMUSG00000062232(Rapgef2)	ENSMUSG00000042745(Id1)
BP	GO:0046483	heterocycle metabolic process	85	33	118	5545	0.030989	0.191222	ENSMUSG00000000247(Lhx2),ENSMUSG00000001156(Mxd1),ENSMUSG00000001552(Jup),ENSMUSG00000002227(Mov10),ENSMUSG00000002307(Daxx),ENSMUSG00000004040(Stat3),ENSMUSG00000004698(Hdac9),ENSMUSG00000006310(Zbtb32),ENSMUSG00000014773(Dll1),ENSMUSG00000019979(Apaf1),ENSMUSG00000019990(Pde7b),ENSMUSG00000020415(Pttg1),ENSMUSG00000020464(Pnpt1),ENSMUSG00000020638(Cmpk2),ENSMUSG00000021127(Zfp36l1),ENSMUSG00000…	ENSMUSG00000002769(Gnmt),ENSMUSG00000009566(Fpgs),ENSMUSG00000016984(Etaa1),ENSMUSG00000020974(Pole2),ENSMUSG00000022474(Pmm1),ENSMUSG00000025764(Jade1),ENSMUSG00000026409(Pfkfb2),ENSMUSG00000026575(Nme7),ENSMUSG00000026873(Phf19),ENSMUSG00000026883(Dab2ip),ENSMUSG00000028933(Xrcc2),ENSMUSG00000030145(Zfp248),ENSMUSG00000030322(Mbd4),ENSMUSG00000031671(Setd6),ENSMUSG00000032456(Nmnat3),ENSMUSG000…
CC	GO:0035102	PRC1 complex	2	0	2	15	0.0311093	0.191332	ENSMUSG00000024805(Pcgf5),ENSMUSG00000039989(Cbx4)	-
CC	GO:0042824	MHC class I peptide loading complex	2	0	2	15	0.0311093	0.191332	ENSMUSG00000035929(H2-Q4),ENSMUSG00000037321(Tap1)	-
BP	GO:0050771	negative regulation of axonogenesis	3	1	4	65	0.0311351	0.191332	ENSMUSG00000015222(Map2),ENSMUSG00000026121(Sema4c),ENSMUSG00000079227(Ccr5)	ENSMUSG00000001227(Sema6b)
BP	GO:0090398	cellular senescence	4	0	4	65	0.0311351	0.191332	ENSMUSG00000020464(Pnpt1),ENSMUSG00000027641(Rbl1),ENSMUSG00000036986(Pml),ENSMUSG00000054580(Pla2r1)	-
BP	GO:0002285	lymphocyte activation involved in immune response	7	1	8	200	0.0312154	0.191587	ENSMUSG00000004040(Stat3),ENSMUSG00000014773(Dll1),ENSMUSG00000024610(Cd74),ENSMUSG00000037944(Ccr7),ENSMUSG00000039899(Fgl2),ENSMUSG00000044701(Il27),ENSMUSG00000048806(Ifnb1)	ENSMUSG00000046006(Gapt)
BP	GO:0051348	negative regulation of transferase activity	9	1	10	276	0.0312408	0.191587	ENSMUSG00000026360(Rgs2),ENSMUSG00000029204(Rhoh),ENSMUSG00000031628(Casp3),ENSMUSG00000034765(Dusp5),ENSMUSG00000036986(Pml),ENSMUSG00000042901(Aida),ENSMUSG00000044786(Zfp36),ENSMUSG00000052087(Rgs14),ENSMUSG00000117975(Itprip)	ENSMUSG00000026883(Dab2ip)
BP	GO:0023052	signaling	123	21	144	6916	0.0313843	0.192269	ENSMUSG00000001552(Jup),ENSMUSG00000001768(Rin2),ENSMUSG00000002104(Rapsn),ENSMUSG00000002307(Daxx),ENSMUSG00000004040(Stat3),ENSMUSG00000009185(Ccl8),ENSMUSG00000010358(Ifi35),ENSMUSG00000012519(Mlkl),ENSMUSG00000014361(Mertk),ENSMUSG00000014773(Dll1),ENSMUSG00000015316(Slamf1),ENSMUSG00000015852(Fcrls),ENSMUSG00000015947(Fcgr1),ENSMUSG00000016524(Il19),ENSMUSG00000017314(Mpp2),ENSMUSG0000001783…	ENSMUSG00000001227(Sema6b),ENSMUSG00000022494(Shisa9),ENSMUSG00000023915(Tnfrsf21),ENSMUSG00000024186(Rgs11),ENSMUSG00000025764(Jade1),ENSMUSG00000025931(Paqr8),ENSMUSG00000026409(Pfkfb2),ENSMUSG00000026785(Pkn3),ENSMUSG00000026883(Dab2ip),ENSMUSG00000028539(Artn),ENSMUSG00000032641(Gpr19),ENSMUSG00000034758(Tle6),ENSMUSG00000034957(Cebpa),ENSMUSG00000036867(Smad6),ENSMUSG00000037098(Rab11fip3),E…
BP	GO:0048017	inositol lipid-mediated signaling	6	1	7	164	0.0314915	0.192728	ENSMUSG00000020709(Adap2),ENSMUSG00000021127(Zfp36l1),ENSMUSG00000021367(Edn1),ENSMUSG00000034573(Ptpn13),ENSMUSG00000034997(Htr2a),ENSMUSG00000062960(Kdr)	ENSMUSG00000026883(Dab2ip)
BP	GO:0048872	homeostasis of number of cells	10	1	11	316	0.0316587	0.193553	ENSMUSG00000004040(Stat3),ENSMUSG00000014361(Mertk),ENSMUSG00000021127(Zfp36l1),ENSMUSG00000024610(Cd74),ENSMUSG00000026770(Il2ra),ENSMUSG00000031628(Casp3),ENSMUSG00000035692(Isg15),ENSMUSG00000036381(P2ry14),ENSMUSG00000037944(Ccr7),ENSMUSG00000044786(Zfp36)	ENSMUSG00000046006(Gapt)
BP	GO:0051253	negative regulation of RNA metabolic process	28	9	37	1476	0.0318761	0.193603	ENSMUSG00000001156(Mxd1),ENSMUSG00000002307(Daxx),ENSMUSG00000004040(Stat3),ENSMUSG00000004698(Hdac9),ENSMUSG00000006310(Zbtb32),ENSMUSG00000021367(Edn1),ENSMUSG00000024238(Zeb1),ENSMUSG00000026536(Ifi211),ENSMUSG00000027018(Hat1),ENSMUSG00000027641(Rbl1),ENSMUSG00000033871(Ppargc1b),ENSMUSG00000034765(Dusp5),ENSMUSG00000036986(Pml),ENSMUSG00000037447(Arid5a),ENSMUSG00000039989(Cbx4),ENSMUSG00000…	ENSMUSG00000026873(Phf19),ENSMUSG00000026883(Dab2ip),ENSMUSG00000030145(Zfp248),ENSMUSG00000034758(Tle6),ENSMUSG00000034957(Cebpa),ENSMUSG00000042745(Id1),ENSMUSG00000056501(Cebpb),ENSMUSG00000069272(H2ac8),ENSMUSG00000074519(Zfp971)
BP	GO:0051154	negative regulation of striated muscle cell differentiation	3	0	3	38	0.0319296	0.193603	ENSMUSG00000014773(Dll1),ENSMUSG00000026360(Rgs2),ENSMUSG00000034855(Cxcl10)	-
BP	GO:2000145	regulation of cell motility	23	3	26	966	0.0323355	0.193603	ENSMUSG00000001552(Jup),ENSMUSG00000001768(Rin2),ENSMUSG00000004040(Stat3),ENSMUSG00000004698(Hdac9),ENSMUSG00000015316(Slamf1),ENSMUSG00000020717(Pecam1),ENSMUSG00000021367(Edn1),ENSMUSG00000024397(Aif1),ENSMUSG00000024610(Cd74),ENSMUSG00000026121(Sema4c),ENSMUSG00000026222(Sp100),ENSMUSG00000026581(Sell),ENSMUSG00000026981(Il1rn),ENSMUSG00000029204(Rhoh),ENSMUSG00000034855(Cxcl10),ENSMUSG000000…	ENSMUSG00000001227(Sema6b),ENSMUSG00000026883(Dab2ip),ENSMUSG00000052934(Fbxo31)
MF	GO:0019205	nucleobase-containing compound kinase activity	2	1	3	39	0.0324951	0.193603	ENSMUSG00000020638(Cmpk2),ENSMUSG00000029366(Dck)	ENSMUSG00000026575(Nme7)
MF	GO:0004551	nucleotide diphosphatase activity	2	0	2	16	0.032614	0.193603	ENSMUSG00000023961(Enpp4),ENSMUSG00000028100(Nudt17)	-
MF	GO:0032183	SUMO binding	2	0	2	16	0.032614	0.193603	ENSMUSG00000036986(Pml),ENSMUSG00000039989(Cbx4)	-
MF	GO:0043495	protein-membrane adaptor activity	2	0	2	16	0.032614	0.193603	ENSMUSG00000001552(Jup),ENSMUSG00000002104(Rapsn)	-
BP	GO:0042278	purine nucleoside metabolic process	2	2	4	66	0.0326825	0.193603	ENSMUSG00000023961(Enpp4),ENSMUSG00000029780(Nt5c3)	ENSMUSG00000002769(Gnmt),ENSMUSG00000026575(Nme7)
BP	GO:0044092	negative regulation of molecular function	25	5	30	1151	0.0327471	0.193603	ENSMUSG00000000247(Lhx2),ENSMUSG00000004698(Hdac9),ENSMUSG00000015222(Map2),ENSMUSG00000020415(Pttg1),ENSMUSG00000020717(Pecam1),ENSMUSG00000026360(Rgs2),ENSMUSG00000026535(Ifi202b),ENSMUSG00000029204(Rhoh),ENSMUSG00000031628(Casp3),ENSMUSG00000034765(Dusp5),ENSMUSG00000036362(P2ry13),ENSMUSG00000036986(Pml),ENSMUSG00000037860(Aim2),ENSMUSG00000042901(Aida),ENSMUSG00000044786(Zfp36),ENSMUSG000000…	ENSMUSG00000000983(Wfdc18),ENSMUSG00000026883(Dab2ip),ENSMUSG00000031671(Setd6),ENSMUSG00000038065(Mturn),ENSMUSG00000042745(Id1)
BP	GO:0009116	nucleoside metabolic process	3	2	5	97	0.0327569	0.193603	ENSMUSG00000023961(Enpp4),ENSMUSG00000029366(Dck),ENSMUSG00000029780(Nt5c3)	ENSMUSG00000002769(Gnmt),ENSMUSG00000026575(Nme7)
BP	GO:0040012	regulation of locomotion	23	4	27	1013	0.0328013	0.193603	ENSMUSG00000001552(Jup),ENSMUSG00000001768(Rin2),ENSMUSG00000004040(Stat3),ENSMUSG00000004698(Hdac9),ENSMUSG00000015316(Slamf1),ENSMUSG00000020717(Pecam1),ENSMUSG00000021367(Edn1),ENSMUSG00000024397(Aif1),ENSMUSG00000024610(Cd74),ENSMUSG00000026121(Sema4c),ENSMUSG00000026222(Sp100),ENSMUSG00000026581(Sell),ENSMUSG00000026981(Il1rn),ENSMUSG00000029204(Rhoh),ENSMUSG00000034855(Cxcl10),ENSMUSG000000…	ENSMUSG00000001227(Sema6b),ENSMUSG00000026883(Dab2ip),ENSMUSG00000028539(Artn),ENSMUSG00000052934(Fbxo31)
CC	GO:0005657	replication fork	1	3	4	65	0.0332519	0.193603	ENSMUSG00000039994(Timeless)	ENSMUSG00000016984(Etaa1),ENSMUSG00000028933(Xrcc2),ENSMUSG00000038644(Pold1)
BP	GO:0001886	endothelial cell morphogenesis	1	1	2	16	0.0337993	0.193603	ENSMUSG00000020717(Pecam1)	ENSMUSG00000042745(Id1)
BP	GO:0002407	dendritic cell chemotaxis	2	0	2	16	0.0337993	0.193603	ENSMUSG00000015316(Slamf1),ENSMUSG00000037944(Ccr7)	-
BP	GO:0002830	positive regulation of type 2 immune response	2	0	2	16	0.0337993	0.193603	ENSMUSG00000020641(Rsad2),ENSMUSG00000024610(Cd74)	-
BP	GO:0002863	positive regulation of inflammatory response to antigenic stimulus	2	0	2	16	0.0337993	0.193603	ENSMUSG00000015947(Fcgr1),ENSMUSG00000037944(Ccr7)	-
BP	GO:0032693	negative regulation of interleukin-10 production	1	1	2	16	0.0337993	0.193603	ENSMUSG00000014773(Dll1)	ENSMUSG00000023915(Tnfrsf21)
BP	GO:0035278	miRNA mediated inhibition of translation	2	0	2	16	0.0337993	0.193603	ENSMUSG00000004040(Stat3),ENSMUSG00000044786(Zfp36)	-
BP	GO:0040033	negative regulation of translation, ncRNA-mediated	2	0	2	16	0.0337993	0.193603	ENSMUSG00000004040(Stat3),ENSMUSG00000044786(Zfp36)	-
BP	GO:0045974	regulation of translation, ncRNA-mediated	2	0	2	16	0.0337993	0.193603	ENSMUSG00000004040(Stat3),ENSMUSG00000044786(Zfp36)	-
BP	GO:0055091	phospholipid homeostasis	2	0	2	16	0.0337993	0.193603	ENSMUSG00000004040(Stat3),ENSMUSG00000053846(Lipg)	-
BP	GO:0051726	regulation of cell cycle	17	9	26	971	0.0341123	0.193603	ENSMUSG00000000184(Ccnd2),ENSMUSG00000004040(Stat3),ENSMUSG00000020415(Pttg1),ENSMUSG00000020464(Pnpt1),ENSMUSG00000021127(Zfp36l1),ENSMUSG00000021367(Edn1),ENSMUSG00000024397(Aif1),ENSMUSG00000024887(Asah2),ENSMUSG00000027641(Rbl1),ENSMUSG00000031292(Cdkl5),ENSMUSG00000031628(Casp3),ENSMUSG00000035352(Ccl12),ENSMUSG00000036986(Pml),ENSMUSG00000039994(Timeless),ENSMUSG00000049488(Tmem67),ENSMUSG0…	ENSMUSG00000016984(Etaa1),ENSMUSG00000024056(Ndc80),ENSMUSG00000025764(Jade1),ENSMUSG00000026883(Dab2ip),ENSMUSG00000027379(Bub1),ENSMUSG00000034957(Cebpa),ENSMUSG00000037098(Rab11fip3),ENSMUSG00000052934(Fbxo31),ENSMUSG00000072082(Ccnf)
BP	GO:0042092	type 2 immune response	3	0	3	39	0.034135	0.193603	ENSMUSG00000020641(Rsad2),ENSMUSG00000024610(Cd74),ENSMUSG00000048806(Ifnb1)	-
BP	GO:0002698	negative regulation of immune effector process	6	0	6	132	0.0345708	0.193603	ENSMUSG00000015316(Slamf1),ENSMUSG00000017830(Dhx58),ENSMUSG00000026770(Il2ra),ENSMUSG00000037321(Tap1),ENSMUSG00000039899(Fgl2),ENSMUSG00000048806(Ifnb1)	-
BP	GO:0048675	axon extension	5	1	6	132	0.0345708	0.193603	ENSMUSG00000000247(Lhx2),ENSMUSG00000015222(Map2),ENSMUSG00000026121(Sema4c),ENSMUSG00000031292(Cdkl5),ENSMUSG00000079227(Ccr5)	ENSMUSG00000001227(Sema6b)
BP	GO:0007154	cell communication	124	21	145	6991	0.0346657	0.193603	ENSMUSG00000001552(Jup),ENSMUSG00000001768(Rin2),ENSMUSG00000002104(Rapsn),ENSMUSG00000002307(Daxx),ENSMUSG00000004040(Stat3),ENSMUSG00000009185(Ccl8),ENSMUSG00000010358(Ifi35),ENSMUSG00000012519(Mlkl),ENSMUSG00000014361(Mertk),ENSMUSG00000014773(Dll1),ENSMUSG00000015316(Slamf1),ENSMUSG00000015852(Fcrls),ENSMUSG00000015947(Fcgr1),ENSMUSG00000016524(Il19),ENSMUSG00000017314(Mpp2),ENSMUSG0000001783…	ENSMUSG00000001227(Sema6b),ENSMUSG00000022494(Shisa9),ENSMUSG00000023915(Tnfrsf21),ENSMUSG00000024186(Rgs11),ENSMUSG00000025764(Jade1),ENSMUSG00000025931(Paqr8),ENSMUSG00000026409(Pfkfb2),ENSMUSG00000026785(Pkn3),ENSMUSG00000026883(Dab2ip),ENSMUSG00000028539(Artn),ENSMUSG00000032641(Gpr19),ENSMUSG00000034758(Tle6),ENSMUSG00000034957(Cebpa),ENSMUSG00000036867(Smad6),ENSMUSG00000037098(Rab11fip3),E…
MF	GO:0051539	4 iron, 4 sulfur cluster binding	2	1	3	40	0.0346766	0.193603	ENSMUSG00000020641(Rsad2),ENSMUSG00000034329(Brip1)	ENSMUSG00000038644(Pold1)
BP	GO:0006725	cellular aromatic compound metabolic process	86	33	119	5623	0.0351112	0.193603	ENSMUSG00000000247(Lhx2),ENSMUSG00000001156(Mxd1),ENSMUSG00000001552(Jup),ENSMUSG00000002227(Mov10),ENSMUSG00000002307(Daxx),ENSMUSG00000004040(Stat3),ENSMUSG00000004698(Hdac9),ENSMUSG00000006310(Zbtb32),ENSMUSG00000014773(Dll1),ENSMUSG00000019979(Apaf1),ENSMUSG00000019990(Pde7b),ENSMUSG00000020415(Pttg1),ENSMUSG00000020464(Pnpt1),ENSMUSG00000020638(Cmpk2),ENSMUSG00000021127(Zfp36l1),ENSMUSG00000…	ENSMUSG00000002769(Gnmt),ENSMUSG00000009566(Fpgs),ENSMUSG00000016984(Etaa1),ENSMUSG00000020974(Pole2),ENSMUSG00000022474(Pmm1),ENSMUSG00000025764(Jade1),ENSMUSG00000026409(Pfkfb2),ENSMUSG00000026575(Nme7),ENSMUSG00000026873(Phf19),ENSMUSG00000026883(Dab2ip),ENSMUSG00000028933(Xrcc2),ENSMUSG00000030145(Zfp248),ENSMUSG00000030322(Mbd4),ENSMUSG00000031671(Setd6),ENSMUSG00000032456(Nmnat3),ENSMUSG000…
MF	GO:0019207	kinase regulator activity	6	2	8	209	0.0353269	0.193603	ENSMUSG00000000184(Ccnd2),ENSMUSG00000002307(Daxx),ENSMUSG00000029204(Rhoh),ENSMUSG00000031628(Casp3),ENSMUSG00000069874(Irgm2),ENSMUSG00000117975(Itprip)	ENSMUSG00000016984(Etaa1),ENSMUSG00000072082(Ccnf)
BP	GO:0071383	cellular response to steroid hormone stimulus	6	2	8	205	0.0353485	0.193603	ENSMUSG00000002307(Daxx),ENSMUSG00000021127(Zfp36l1),ENSMUSG00000021367(Edn1),ENSMUSG00000033871(Ppargc1b),ENSMUSG00000044786(Zfp36),ENSMUSG00000048806(Ifnb1)	ENSMUSG00000025931(Paqr8),ENSMUSG00000033863(Klf9)
BP	GO:0040013	negative regulation of locomotion	9	2	11	322	0.0355392	0.193603	ENSMUSG00000001552(Jup),ENSMUSG00000004040(Stat3),ENSMUSG00000024397(Aif1),ENSMUSG00000024610(Cd74),ENSMUSG00000026121(Sema4c),ENSMUSG00000026222(Sp100),ENSMUSG00000026981(Il1rn),ENSMUSG00000035352(Ccl12),ENSMUSG00000079227(Ccr5)	ENSMUSG00000001227(Sema6b),ENSMUSG00000026883(Dab2ip)
MF	GO:0001631	cysteinyl leukotriene receptor activity	1	0	1	2	0.0355505	0.193603	ENSMUSG00000033470(Cysltr2)	-
MF	GO:0003692	left-handed Z-DNA binding	1	0	1	2	0.0355505	0.193603	ENSMUSG00000027514(Zbp1)	-
MF	GO:0003834	beta-carotene 15,15'-monooxygenase activity	1	0	1	2	0.0355505	0.193603	ENSMUSG00000032066(Bco2)	-
MF	GO:0004136	deoxyadenosine kinase activity	1	0	1	2	0.0355505	0.193603	ENSMUSG00000029366(Dck)	-
MF	GO:0004137	deoxycytidine kinase activity	1	0	1	2	0.0355505	0.193603	ENSMUSG00000029366(Dck)	-
MF	GO:0004138	deoxyguanosine kinase activity	1	0	1	2	0.0355505	0.193603	ENSMUSG00000029366(Dck)	-
MF	GO:0004615	phosphomannomutase activity	0	1	1	2	0.0355505	0.193603	-	ENSMUSG00000022474(Pmm1)
MF	GO:0004798	thymidylate kinase activity	1	0	1	2	0.0355505	0.193603	ENSMUSG00000020638(Cmpk2)	-
MF	GO:0004911	interleukin-2 receptor activity	1	0	1	2	0.0355505	0.193603	ENSMUSG00000026770(Il2ra)	-
MF	GO:0005150	interleukin-1, type I receptor binding	1	0	1	2	0.0355505	0.193603	ENSMUSG00000026981(Il1rn)	-
MF	GO:0005152	interleukin-1 receptor antagonist activity	1	0	1	2	0.0355505	0.193603	ENSMUSG00000026981(Il1rn)	-
MF	GO:0008263	pyrimidine-specific mismatch base pair DNA N-glycosylase activity	0	1	1	2	0.0355505	0.193603	-	ENSMUSG00000030322(Mbd4)
MF	GO:0008476	protein-tyrosine sulfotransferase activity	1	0	1	2	0.0355505	0.193603	ENSMUSG00000034118(Tpst1)	-
MF	GO:0010436	carotenoid dioxygenase activity	1	0	1	2	0.0355505	0.193603	ENSMUSG00000032066(Bco2)	-
MF	GO:0015225	biotin transmembrane transporter activity	0	1	1	2	0.0355505	0.193603	-	ENSMUSG00000006641(Slc5a6)
MF	GO:0016005	phospholipase A2 activator activity	1	0	1	2	0.0355505	0.193603	ENSMUSG00000031628(Casp3)	-
MF	GO:0032394	MHC class Ib receptor activity	1	0	1	2	0.0355505	0.193603	ENSMUSG00000030149(Klrk1)	-
MF	GO:0033754	indoleamine 2,3-dioxygenase activity	1	0	1	2	0.0355505	0.193603	ENSMUSG00000031549(Ido2)	-
MF	GO:0035718	macrophage migration inhibitory factor binding	1	0	1	2	0.0355505	0.193603	ENSMUSG00000024610(Cd74)	-
MF	GO:0042007	interleukin-18 binding	1	0	1	2	0.0355505	0.193603	ENSMUSG00000070427(Il18bp)	-
MF	GO:0045523	interleukin-27 receptor binding	1	0	1	2	0.0355505	0.193603	ENSMUSG00000044701(Il27)	-
MF	GO:0046980	tapasin binding	1	0	1	2	0.0355505	0.193603	ENSMUSG00000037321(Tap1)	-
MF	GO:0047710	bis(5'-adenosyl)-triphosphatase activity	1	0	1	2	0.0355505	0.193603	ENSMUSG00000023961(Enpp4)	-
MF	GO:0070774	phytoceramidase activity	1	0	1	2	0.0355505	0.193603	ENSMUSG00000024887(Asah2)	-
MF	GO:0071886	1-(4-iodo-2,5-dimethoxyphenyl)propan-2-amine binding	1	0	1	2	0.0355505	0.193603	ENSMUSG00000034997(Htr2a)	-
MF	GO:0106006	cytoskeletal protein-membrane anchor activity	1	0	1	2	0.0355505	0.193603	ENSMUSG00000001552(Jup)	-
MF	GO:0140351	glycosylceramide flippase activity	1	0	1	2	0.0355505	0.193603	ENSMUSG00000025324(Atp10a)	-
BP	GO:0002437	inflammatory response to antigenic stimulus	4	0	4	68	0.0359103	0.193603	ENSMUSG00000015947(Fcgr1),ENSMUSG00000026770(Il2ra),ENSMUSG00000026981(Il1rn),ENSMUSG00000037944(Ccr7)	-
BP	GO:0002709	regulation of T cell mediated immunity	4	0	4	68	0.0359103	0.193603	ENSMUSG00000015316(Slamf1),ENSMUSG00000020641(Rsad2),ENSMUSG00000037447(Arid5a),ENSMUSG00000048806(Ifnb1)	-
BP	GO:0016239	positive regulation of macroautophagy	4	0	4	68	0.0359103	0.193603	ENSMUSG00000038058(Nod1),ENSMUSG00000046879(Irgm1),ENSMUSG00000062960(Kdr),ENSMUSG00000069874(Irgm2)	-
CC	GO:0032839	dendrite cytoplasm	3	0	3	39	0.0359861	0.193603	ENSMUSG00000015222(Map2),ENSMUSG00000026764(Kif5c),ENSMUSG00000031292(Cdkl5)	-
BP	GO:0006807	nitrogen compound metabolic process	151	45	196	9745	0.0360378	0.193603	ENSMUSG00000000184(Ccnd2),ENSMUSG00000000247(Lhx2),ENSMUSG00000001156(Mxd1),ENSMUSG00000001552(Jup),ENSMUSG00000002227(Mov10),ENSMUSG00000002307(Daxx),ENSMUSG00000004040(Stat3),ENSMUSG00000004698(Hdac9),ENSMUSG00000006310(Zbtb32),ENSMUSG00000009185(Ccl8),ENSMUSG00000012519(Mlkl),ENSMUSG00000014361(Mertk),ENSMUSG00000014773(Dll1),ENSMUSG00000015316(Slamf1),ENSMUSG00000015947(Fcgr1),ENSMUSG00000019…	ENSMUSG00000000983(Wfdc18),ENSMUSG00000002769(Gnmt),ENSMUSG00000006442(Srm),ENSMUSG00000009566(Fpgs),ENSMUSG00000016984(Etaa1),ENSMUSG00000020974(Pole2),ENSMUSG00000022474(Pmm1),ENSMUSG00000025764(Jade1),ENSMUSG00000026409(Pfkfb2),ENSMUSG00000026575(Nme7),ENSMUSG00000026785(Pkn3),ENSMUSG00000026873(Phf19),ENSMUSG00000026883(Dab2ip),ENSMUSG00000026975(Dph7),ENSMUSG00000027379(Bub1),ENSMUSG00000028…
BP	GO:0002366	leukocyte activation involved in immune response	9	1	10	283	0.0361175	0.193603	ENSMUSG00000004040(Stat3),ENSMUSG00000010358(Ifi35),ENSMUSG00000014773(Dll1),ENSMUSG00000015316(Slamf1),ENSMUSG00000024610(Cd74),ENSMUSG00000037944(Ccr7),ENSMUSG00000039899(Fgl2),ENSMUSG00000044701(Il27),ENSMUSG00000048806(Ifnb1)	ENSMUSG00000046006(Gapt)
BP	GO:0001694	histamine biosynthetic process	1	0	1	2	0.0362417	0.193603	ENSMUSG00000027360(Hdc)	-
BP	GO:0001788	antibody-dependent cellular cytotoxicity	1	0	1	2	0.0362417	0.193603	ENSMUSG00000015947(Fcgr1)	-
BP	GO:0002343	peripheral B cell selection	1	0	1	2	0.0362417	0.193603	ENSMUSG00000073421(H2-Ab1)	-
BP	GO:0002344	B cell affinity maturation	1	0	1	2	0.0362417	0.193603	ENSMUSG00000073421(H2-Ab1)	-
BP	GO:0002479	antigen processing and presentation of exogenous peptide antigen via MHC class I, TAP-dependent	1	0	1	2	0.0362417	0.193603	ENSMUSG00000037321(Tap1)	-
BP	GO:0002518	lymphocyte chemotaxis across high endothelial venule	1	0	1	2	0.0362417	0.193603	ENSMUSG00000037944(Ccr7)	-
BP	GO:0002644	negative regulation of tolerance induction	1	0	1	2	0.0362417	0.193603	ENSMUSG00000022901(Cd86)	-
BP	GO:0002649	regulation of tolerance induction to self antigen	1	0	1	2	0.0362417	0.193603	ENSMUSG00000037944(Ccr7)	-
BP	GO:0003342	proepicardium development	1	0	1	2	0.0362417	0.193603	ENSMUSG00000021127(Zfp36l1)	-
BP	GO:0003343	septum transversum development	1	0	1	2	0.0362417	0.193603	ENSMUSG00000021127(Zfp36l1)	-
BP	GO:0006170	dAMP biosynthetic process	1	0	1	2	0.0362417	0.193603	ENSMUSG00000029366(Dck)	-
BP	GO:0006227	dUDP biosynthetic process	1	0	1	2	0.0362417	0.193603	ENSMUSG00000020638(Cmpk2)	-
BP	GO:0006233	dTDP biosynthetic process	1	0	1	2	0.0362417	0.193603	ENSMUSG00000020638(Cmpk2)	-
BP	GO:0006478	peptidyl-tyrosine sulfation	1	0	1	2	0.0362417	0.193603	ENSMUSG00000034118(Tpst1)	-
BP	GO:0007352	zygotic specification of dorsal/ventral axis	0	1	1	2	0.0362417	0.193603	-	ENSMUSG00000036867(Smad6)
BP	GO:0009139	pyrimidine nucleoside diphosphate biosynthetic process	1	0	1	2	0.0362417	0.193603	ENSMUSG00000020638(Cmpk2)	-
BP	GO:0009171	purine deoxyribonucleoside monophosphate biosynthetic process	1	0	1	2	0.0362417	0.193603	ENSMUSG00000029366(Dck)	-
BP	GO:0009196	pyrimidine deoxyribonucleoside diphosphate metabolic process	1	0	1	2	0.0362417	0.193603	ENSMUSG00000020638(Cmpk2)	-
BP	GO:0009197	pyrimidine deoxyribonucleoside diphosphate biosynthetic process	1	0	1	2	0.0362417	0.193603	ENSMUSG00000020638(Cmpk2)	-
BP	GO:0010525	regulation of transposition, RNA-mediated	1	0	1	2	0.0362417	0.193603	ENSMUSG00000002227(Mov10)	-
BP	GO:0010526	negative regulation of transposition, RNA-mediated	1	0	1	2	0.0362417	0.193603	ENSMUSG00000002227(Mov10)	-
BP	GO:0010705	meiotic DNA double-strand break processing involved in reciprocal meiotic recombination	1	0	1	2	0.0362417	0.193603	ENSMUSG00000034329(Brip1)	-
BP	GO:0014852	regulation of skeletal muscle contraction by neural stimulation via neuromuscular junction	1	0	1	2	0.0362417	0.193603	ENSMUSG00000030409(Dmpk)	-
BP	GO:0014853	regulation of excitatory postsynaptic membrane potential involved in skeletal muscle contraction	1	0	1	2	0.0362417	0.193603	ENSMUSG00000030409(Dmpk)	-
BP	GO:0015878	biotin transport	0	1	1	2	0.0362417	0.193603	-	ENSMUSG00000006641(Slc5a6)
BP	GO:0016119	carotene metabolic process	1	0	1	2	0.0362417	0.193603	ENSMUSG00000032066(Bco2)	-
BP	GO:0016121	carotene catabolic process	1	0	1	2	0.0362417	0.193603	ENSMUSG00000032066(Bco2)	-
BP	GO:0016122	xanthophyll metabolic process	1	0	1	2	0.0362417	0.193603	ENSMUSG00000032066(Bco2)	-
BP	GO:0019442	tryptophan catabolic process to acetyl-CoA	1	0	1	2	0.0362417	0.193603	ENSMUSG00000026866(Kynu)	-
BP	GO:0021687	cerebellar molecular layer morphogenesis	1	0	1	2	0.0362417	0.193603	ENSMUSG00000014773(Dll1)	-
BP	GO:0021693	cerebellar Purkinje cell layer structural organization	1	0	1	2	0.0362417	0.193603	ENSMUSG00000014773(Dll1)	-
BP	GO:0021698	cerebellar cortex structural organization	1	0	1	2	0.0362417	0.193603	ENSMUSG00000014773(Dll1)	-
BP	GO:0030185	nitric oxide transport	1	0	1	2	0.0362417	0.193603	ENSMUSG00000021367(Edn1)	-
BP	GO:0030887	positive regulation of myeloid dendritic cell activation	1	0	1	2	0.0362417	0.193603	ENSMUSG00000030149(Klrk1)	-
BP	GO:0031583	phospholipase D-activating G protein-coupled receptor signaling pathway	1	0	1	2	0.0362417	0.193603	ENSMUSG00000021367(Edn1)	-
BP	GO:0034127	regulation of MyD88-independent toll-like receptor signaling pathway	1	0	1	2	0.0362417	0.193603	ENSMUSG00000025498(Irf7)	-
BP	GO:0034696	response to prostaglandin F	1	0	1	2	0.0362417	0.193603	ENSMUSG00000021367(Edn1)	-
BP	GO:0043111	replication fork arrest	1	0	1	2	0.0362417	0.193603	ENSMUSG00000039994(Timeless)	-
BP	GO:0045004	DNA replication proofreading	0	1	1	2	0.0362417	0.193603	-	ENSMUSG00000038644(Pold1)
BP	GO:0046072	dTDP metabolic process	1	0	1	2	0.0362417	0.193603	ENSMUSG00000020638(Cmpk2)	-
BP	GO:0046077	dUDP metabolic process	1	0	1	2	0.0362417	0.193603	ENSMUSG00000020638(Cmpk2)	-
BP	GO:0046092	deoxycytidine metabolic process	1	0	1	2	0.0362417	0.193603	ENSMUSG00000029366(Dck)	-
BP	GO:0046247	terpene catabolic process	1	0	1	2	0.0362417	0.193603	ENSMUSG00000032066(Bco2)	-
BP	GO:0046900	tetrahydrofolylpolyglutamate metabolic process	0	1	1	2	0.0362417	0.193603	-	ENSMUSG00000009566(Fpgs)
BP	GO:0060819	inactivation of X chromosome by genetic imprinting	1	0	1	2	0.0362417	0.193603	ENSMUSG00000024805(Pcgf5)	-
BP	GO:0060844	arterial endothelial cell fate commitment	1	0	1	2	0.0362417	0.193603	ENSMUSG00000014773(Dll1)	-
BP	GO:0060846	blood vessel endothelial cell fate commitment	1	0	1	2	0.0362417	0.193603	ENSMUSG00000014773(Dll1)	-
BP	GO:0060853	Notch signaling pathway involved in arterial endothelial cell fate commitment	1	0	1	2	0.0362417	0.193603	ENSMUSG00000014773(Dll1)	-
BP	GO:0071881	adenylate cyclase-inhibiting adrenergic receptor signaling pathway	1	0	1	2	0.0362417	0.193603	ENSMUSG00000026360(Rgs2)	-
BP	GO:0072737	response to diamide	1	0	1	2	0.0362417	0.193603	ENSMUSG00000002307(Daxx)	-
BP	GO:0072738	cellular response to diamide	1	0	1	2	0.0362417	0.193603	ENSMUSG00000002307(Daxx)	-
BP	GO:0090615	mitochondrial mRNA processing	1	0	1	2	0.0362417	0.193603	ENSMUSG00000020464(Pnpt1)	-
BP	GO:0097022	lymphocyte migration into lymph node	1	0	1	2	0.0362417	0.193603	ENSMUSG00000037944(Ccr7)	-
BP	GO:0097101	blood vessel endothelial cell fate specification	1	0	1	2	0.0362417	0.193603	ENSMUSG00000014773(Dll1)	-
BP	GO:0097528	execution phase of necroptosis	1	0	1	2	0.0362417	0.193603	ENSMUSG00000012519(Mlkl)	-
BP	GO:0098964	anterograde dendritic transport of messenger ribonucleoprotein complex	1	0	1	2	0.0362417	0.193603	ENSMUSG00000026764(Kif5c)	-
BP	GO:0150064	vertebrate eye-specific patterning	1	0	1	2	0.0362417	0.193603	ENSMUSG00000036887(C1qa)	-
BP	GO:1900477	negative regulation of G1/S transition of mitotic cell cycle by negative regulation of transcription from RNA polymerase II promoter	1	0	1	2	0.0362417	0.193603	ENSMUSG00000078763(Slfn1)	-
BP	GO:1900924	negative regulation of glycine import across plasma membrane	1	0	1	2	0.0362417	0.193603	ENSMUSG00000026360(Rgs2)	-
BP	GO:1901052	sarcosine metabolic process	0	1	1	2	0.0362417	0.193603	-	ENSMUSG00000002769(Gnmt)
BP	GO:1901624	negative regulation of lymphocyte chemotaxis	1	0	1	2	0.0362417	0.193603	ENSMUSG00000035352(Ccl12)	-
BP	GO:1901740	negative regulation of myoblast fusion	1	0	1	2	0.0362417	0.193603	ENSMUSG00000034855(Cxcl10)	-
BP	GO:1902349	response to chloroquine	1	0	1	2	0.0362417	0.193603	ENSMUSG00000045322(Tlr9)	-
BP	GO:1902724	positive regulation of skeletal muscle satellite cell proliferation	1	0	1	2	0.0362417	0.193603	ENSMUSG00000004040(Stat3)	-
BP	GO:1902728	positive regulation of growth factor dependent skeletal muscle satellite cell proliferation	1	0	1	2	0.0362417	0.193603	ENSMUSG00000004040(Stat3)	-
BP	GO:1902805	positive regulation of synaptic vesicle transport	1	0	1	2	0.0362417	0.193603	ENSMUSG00000015222(Map2)	-
BP	GO:1903744	positive regulation of anterograde synaptic vesicle transport	1	0	1	2	0.0362417	0.193603	ENSMUSG00000015222(Map2)	-
BP	GO:1904245	regulation of polynucleotide adenylyltransferase activity	1	0	1	2	0.0362417	0.193603	ENSMUSG00000044786(Zfp36)	-
BP	GO:1904527	negative regulation of microtubule binding	1	0	1	2	0.0362417	0.193603	ENSMUSG00000015222(Map2)	-
BP	GO:1904685	positive regulation of metalloendopeptidase activity	1	0	1	2	0.0362417	0.193603	ENSMUSG00000004040(Stat3)	-
BP	GO:1904975	response to bleomycin	1	0	1	2	0.0362417	0.193603	ENSMUSG00000039994(Timeless)	-
BP	GO:1904976	cellular response to bleomycin	1	0	1	2	0.0362417	0.193603	ENSMUSG00000039994(Timeless)	-
BP	GO:1905135	biotin import across plasma membrane	0	1	1	2	0.0362417	0.193603	-	ENSMUSG00000006641(Slc5a6)
BP	GO:2000349	negative regulation of CD40 signaling pathway	1	0	1	2	0.0362417	0.193603	ENSMUSG00000015316(Slamf1)	-
BP	GO:2000448	positive regulation of macrophage migration inhibitory factor signaling pathway	1	0	1	2	0.0362417	0.193603	ENSMUSG00000024610(Cd74)	-
BP	GO:2000522	positive regulation of immunological synapse formation	1	0	1	2	0.0362417	0.193603	ENSMUSG00000037944(Ccr7)	-
BP	GO:2000575	negative regulation of microtubule motor activity	1	0	1	2	0.0362417	0.193603	ENSMUSG00000015222(Map2)	-
CC	GO:0016605	PML body	5	0	5	98	0.0367182	0.195045	ENSMUSG00000002307(Daxx),ENSMUSG00000026222(Sp100),ENSMUSG00000036986(Pml),ENSMUSG00000039236(Isg20),ENSMUSG00000052087(Rgs14)	-
BP	GO:0044267	cellular protein metabolic process	86	20	106	4955	0.0367562	0.195045	ENSMUSG00000000184(Ccnd2),ENSMUSG00000002227(Mov10),ENSMUSG00000002307(Daxx),ENSMUSG00000004040(Stat3),ENSMUSG00000004698(Hdac9),ENSMUSG00000009185(Ccl8),ENSMUSG00000012519(Mlkl),ENSMUSG00000014361(Mertk),ENSMUSG00000015316(Slamf1),ENSMUSG00000015947(Fcgr1),ENSMUSG00000019979(Apaf1),ENSMUSG00000020415(Pttg1),ENSMUSG00000020717(Pecam1),ENSMUSG00000021127(Zfp36l1),ENSMUSG00000021367(Edn1),ENSMUSG00…	ENSMUSG00000000983(Wfdc18),ENSMUSG00000016984(Etaa1),ENSMUSG00000022474(Pmm1),ENSMUSG00000025764(Jade1),ENSMUSG00000026785(Pkn3),ENSMUSG00000026873(Phf19),ENSMUSG00000026883(Dab2ip),ENSMUSG00000026975(Dph7),ENSMUSG00000027379(Bub1),ENSMUSG00000031458(Coprs),ENSMUSG00000031671(Setd6),ENSMUSG00000036867(Smad6),ENSMUSG00000038065(Mturn),ENSMUSG00000038074(Fkbp14),ENSMUSG00000040102(Klhl42),ENSMUSG00…
BP	GO:0051271	negative regulation of cellular component movement	9	2	11	324	0.036904	0.195045	ENSMUSG00000001552(Jup),ENSMUSG00000004040(Stat3),ENSMUSG00000024397(Aif1),ENSMUSG00000024610(Cd74),ENSMUSG00000026121(Sema4c),ENSMUSG00000026222(Sp100),ENSMUSG00000026981(Il1rn),ENSMUSG00000035352(Ccl12),ENSMUSG00000079227(Ccr5)	ENSMUSG00000001227(Sema6b),ENSMUSG00000026883(Dab2ip)
MF	GO:0016504	peptidase activator activity	3	0	3	41	0.0369319	0.195045	ENSMUSG00000019979(Apaf1),ENSMUSG00000023903(Mmp25),ENSMUSG00000030560(Ctsc)	-
MF	GO:0061980	regulatory RNA binding	3	0	3	41	0.0369319	0.195045	ENSMUSG00000020464(Pnpt1),ENSMUSG00000044583(Tlr7),ENSMUSG00000045322(Tlr9)	-
CC	GO:0030905	retromer, tubulation complex	1	0	1	2	0.0370019	0.195045	ENSMUSG00000034484(Snx2)	-
CC	GO:0035692	macrophage migration inhibitory factor receptor complex	1	0	1	2	0.0370019	0.195045	ENSMUSG00000024610(Cd74)	-
CC	GO:0043293	apoptosome	1	0	1	2	0.0370019	0.195045	ENSMUSG00000019979(Apaf1)	-
CC	GO:0044216	other organism cell	1	0	1	2	0.0370019	0.195045	ENSMUSG00000073418(C4b)	-
CC	GO:0044217	other organism part	1	0	1	2	0.0370019	0.195045	ENSMUSG00000073418(C4b)	-
CC	GO:0044301	climbing fiber	0	1	1	2	0.0370019	0.195045	-	ENSMUSG00000026883(Dab2ip)
CC	GO:0045025	mitochondrial degradosome	1	0	1	2	0.0370019	0.195045	ENSMUSG00000020464(Pnpt1)	-
CC	GO:0150001	primary dendrite	1	0	1	2	0.0370019	0.195045	ENSMUSG00000015222(Map2)	-
CC	GO:0150002	distal dendrite	1	0	1	2	0.0370019	0.195045	ENSMUSG00000015222(Map2)	-
CC	GO:1990597	AIP1-IRE1 complex	0	1	1	2	0.0370019	0.195045	-	ENSMUSG00000026883(Dab2ip)
BP	GO:0010977	negative regulation of neuron projection development	5	2	7	170	0.0371567	0.195687	ENSMUSG00000015222(Map2),ENSMUSG00000023206(Il15ra),ENSMUSG00000026121(Sema4c),ENSMUSG00000062232(Rapgef2),ENSMUSG00000079227(Ccr5)	ENSMUSG00000001227(Sema6b),ENSMUSG00000042745(Id1)
CC	GO:0034399	nuclear periphery	4	2	6	132	0.0376822	0.198121	ENSMUSG00000015222(Map2),ENSMUSG00000026536(Ifi211),ENSMUSG00000027018(Hat1),ENSMUSG00000036986(Pml)	ENSMUSG00000034957(Cebpa),ENSMUSG00000056501(Cebpb)
BP	GO:0002864	regulation of acute inflammatory response to antigenic stimulus	2	0	2	17	0.0378512	0.198121	ENSMUSG00000015947(Fcgr1),ENSMUSG00000037944(Ccr7)	-
BP	GO:0010819	regulation of T cell chemotaxis	2	0	2	17	0.0378512	0.198121	ENSMUSG00000034855(Cxcl10),ENSMUSG00000037944(Ccr7)	-
BP	GO:0032695	negative regulation of interleukin-12 production	2	0	2	17	0.0378512	0.198121	ENSMUSG00000015316(Slamf1),ENSMUSG00000037944(Ccr7)	-
BP	GO:0034162	toll-like receptor 9 signaling pathway	2	0	2	17	0.0378512	0.198121	ENSMUSG00000020641(Rsad2),ENSMUSG00000045322(Tlr9)	-
BP	GO:0039535	regulation of RIG-I signaling pathway	2	0	2	17	0.0378512	0.198121	ENSMUSG00000017830(Dhx58),ENSMUSG00000037921(Ddx60)	-
BP	GO:0090141	positive regulation of mitochondrial fission	2	0	2	17	0.0378512	0.198121	ENSMUSG00000023307(Marchf5),ENSMUSG00000062960(Kdr)	-
BP	GO:0007569	cell aging	5	0	5	101	0.0379933	0.198517	ENSMUSG00000020464(Pnpt1),ENSMUSG00000023307(Marchf5),ENSMUSG00000027641(Rbl1),ENSMUSG00000036986(Pml),ENSMUSG00000054580(Pla2r1)	-
BP	GO:1902106	negative regulation of leukocyte differentiation	5	0	5	101	0.0379933	0.198517	ENSMUSG00000023367(Tmem176a),ENSMUSG00000024610(Cd74),ENSMUSG00000029810(Tmem176b),ENSMUSG00000039899(Fgl2),ENSMUSG00000048806(Ifnb1)	-
BP	GO:0002263	cell activation involved in immune response	9	1	10	286	0.0383611	0.200263	ENSMUSG00000004040(Stat3),ENSMUSG00000010358(Ifi35),ENSMUSG00000014773(Dll1),ENSMUSG00000015316(Slamf1),ENSMUSG00000024610(Cd74),ENSMUSG00000037944(Ccr7),ENSMUSG00000039899(Fgl2),ENSMUSG00000044701(Il27),ENSMUSG00000048806(Ifnb1)	ENSMUSG00000046006(Gapt)
BP	GO:0042771	intrinsic apoptotic signaling pathway in response to DNA damage by p53 class mediator	3	0	3	41	0.0387762	0.2019	ENSMUSG00000024610(Cd74),ENSMUSG00000036986(Pml),ENSMUSG00000073489(Ifi204)	-
BP	GO:0048246	macrophage chemotaxis	3	0	3	41	0.0387762	0.2019	ENSMUSG00000015316(Slamf1),ENSMUSG00000035352(Ccl12),ENSMUSG00000037944(Ccr7)	-
BP	GO:2000403	positive regulation of lymphocyte migration	3	0	3	41	0.0387762	0.2019	ENSMUSG00000024397(Aif1),ENSMUSG00000034855(Cxcl10),ENSMUSG00000037944(Ccr7)	-
CC	GO:0000778	condensed nuclear chromosome kinetochore	0	2	2	17	0.0393226	0.204389	-	ENSMUSG00000024056(Ndc80),ENSMUSG00000027379(Bub1)
CC	GO:0000780	condensed nuclear chromosome, centromeric region	0	2	2	17	0.0393226	0.204389	-	ENSMUSG00000024056(Ndc80),ENSMUSG00000027379(Bub1)
BP	GO:0045926	negative regulation of growth	7	2	9	248	0.039425	0.204742	ENSMUSG00000015222(Map2),ENSMUSG00000020464(Pnpt1),ENSMUSG00000026121(Sema4c),ENSMUSG00000026360(Rgs2),ENSMUSG00000036986(Pml),ENSMUSG00000055200(Sertad3),ENSMUSG00000079227(Ccr5)	ENSMUSG00000001227(Sema6b),ENSMUSG00000026883(Dab2ip)
MF	GO:0019887	protein kinase regulator activity	5	2	7	176	0.039823	0.206629	ENSMUSG00000000184(Ccnd2),ENSMUSG00000002307(Daxx),ENSMUSG00000031628(Casp3),ENSMUSG00000069874(Irgm2),ENSMUSG00000117975(Itprip)	ENSMUSG00000016984(Etaa1),ENSMUSG00000072082(Ccnf)
MF	GO:0030695	GTPase regulator activity	7	2	9	254	0.0403615	0.209242	ENSMUSG00000001768(Rin2),ENSMUSG00000020709(Adap2),ENSMUSG00000026358(Rgs1),ENSMUSG00000026360(Rgs2),ENSMUSG00000036995(Asap3),ENSMUSG00000052087(Rgs14),ENSMUSG00000062232(Rapgef2)	ENSMUSG00000026883(Dab2ip),ENSMUSG00000039831(Arhgap29)
MF	GO:0005123	death receptor binding	1	1	2	18	0.0406209	0.210403	ENSMUSG00000031628(Casp3)	ENSMUSG00000026883(Dab2ip)
BP	GO:0002260	lymphocyte homeostasis	3	1	4	71	0.0410854	0.212441	ENSMUSG00000024610(Cd74),ENSMUSG00000026770(Il2ra),ENSMUSG00000031628(Casp3)	ENSMUSG00000046006(Gapt)
BP	GO:0009119	ribonucleoside metabolic process	2	2	4	71	0.0410854	0.212441	ENSMUSG00000023961(Enpp4),ENSMUSG00000029780(Nt5c3)	ENSMUSG00000002769(Gnmt),ENSMUSG00000026575(Nme7)
BP	GO:0048585	negative regulation of response to stimulus	33	6	39	1602	0.041156	0.212537	ENSMUSG00000010358(Ifi35),ENSMUSG00000014773(Dll1),ENSMUSG00000015316(Slamf1),ENSMUSG00000016524(Il19),ENSMUSG00000017830(Dhx58),ENSMUSG00000022684(Bfar),ENSMUSG00000022876(Samsn1),ENSMUSG00000024397(Aif1),ENSMUSG00000024610(Cd74),ENSMUSG00000024887(Asah2),ENSMUSG00000026121(Sema4c),ENSMUSG00000026358(Rgs1),ENSMUSG00000026360(Rgs2),ENSMUSG00000026535(Ifi202b),ENSMUSG00000026770(Il2ra),ENSMUSG0000…	ENSMUSG00000001227(Sema6b),ENSMUSG00000024186(Rgs11),ENSMUSG00000025764(Jade1),ENSMUSG00000026883(Dab2ip),ENSMUSG00000034758(Tle6),ENSMUSG00000036867(Smad6)
BP	GO:0038084	vascular endothelial growth factor signaling pathway	2	1	3	42	0.0412109	0.212537	ENSMUSG00000014773(Dll1),ENSMUSG00000062960(Kdr)	ENSMUSG00000026883(Dab2ip)
BP	GO:2000816	negative regulation of mitotic sister chromatid separation	1	2	3	42	0.0412109	0.212537	ENSMUSG00000020415(Pttg1)	ENSMUSG00000024056(Ndc80),ENSMUSG00000027379(Bub1)
BP	GO:0032269	negative regulation of cellular protein metabolic process	25	3	28	1082	0.041303	0.212828	ENSMUSG00000002227(Mov10),ENSMUSG00000004040(Stat3),ENSMUSG00000020415(Pttg1),ENSMUSG00000020717(Pecam1),ENSMUSG00000021127(Zfp36l1),ENSMUSG00000021367(Edn1),ENSMUSG00000022876(Samsn1),ENSMUSG00000024079(Eif2ak2),ENSMUSG00000026360(Rgs2),ENSMUSG00000026535(Ifi202b),ENSMUSG00000031628(Casp3),ENSMUSG00000034573(Ptpn13),ENSMUSG00000034765(Dusp5),ENSMUSG00000035692(Isg15),ENSMUSG00000036986(Pml),ENSM…	ENSMUSG00000000983(Wfdc18),ENSMUSG00000026883(Dab2ip),ENSMUSG00000036867(Smad6)
BP	GO:1901361	organic cyclic compound catabolic process	14	0	14	456	0.0419343	0.214781	ENSMUSG00000002227(Mov10),ENSMUSG00000019979(Apaf1),ENSMUSG00000019990(Pde7b),ENSMUSG00000020464(Pnpt1),ENSMUSG00000021127(Zfp36l1),ENSMUSG00000023961(Enpp4),ENSMUSG00000026866(Kynu),ENSMUSG00000027360(Hdc),ENSMUSG00000027639(Samhd1),ENSMUSG00000028100(Nudt17),ENSMUSG00000031549(Ido2),ENSMUSG00000035208(Slfn8),ENSMUSG00000039236(Isg20),ENSMUSG00000044786(Zfp36)	-
BP	GO:0019985	translesion synthesis	0	2	2	18	0.0420779	0.214781	-	ENSMUSG00000020974(Pole2),ENSMUSG00000038644(Pold1)
BP	GO:0030889	negative regulation of B cell proliferation	1	1	2	18	0.0420779	0.214781	ENSMUSG00000031628(Casp3)	ENSMUSG00000023915(Tnfrsf21)
BP	GO:0031571	mitotic G1 DNA damage checkpoint	1	1	2	18	0.0420779	0.214781	ENSMUSG00000036986(Pml)	ENSMUSG00000052934(Fbxo31)
BP	GO:0032740	positive regulation of interleukin-17 production	2	0	2	18	0.0420779	0.214781	ENSMUSG00000031712(Il15),ENSMUSG00000037447(Arid5a)	-
BP	GO:0035751	regulation of lysosomal lumen pH	2	0	2	18	0.0420779	0.214781	ENSMUSG00000025058(Tasl),ENSMUSG00000048621(Gm6377)	-
BP	GO:0045655	regulation of monocyte differentiation	2	0	2	18	0.0420779	0.214781	ENSMUSG00000021127(Zfp36l1),ENSMUSG00000024610(Cd74)	-
BP	GO:0050774	negative regulation of dendrite morphogenesis	1	1	2	18	0.0420779	0.214781	ENSMUSG00000062232(Rapgef2)	ENSMUSG00000042745(Id1)
BP	GO:0070102	interleukin-6-mediated signaling pathway	1	1	2	18	0.0420779	0.214781	ENSMUSG00000004040(Stat3)	ENSMUSG00000034957(Cebpa)
BP	GO:0150146	cell junction disassembly	2	0	2	18	0.0420779	0.214781	ENSMUSG00000036887(C1qa),ENSMUSG00000036905(C1qb)	-
BP	GO:1900153	positive regulation of nuclear-transcribed mRNA catabolic process, deadenylation-dependent decay	2	0	2	18	0.0420779	0.214781	ENSMUSG00000021127(Zfp36l1),ENSMUSG00000044786(Zfp36)	-
BP	GO:0001776	leukocyte homeostasis	4	1	5	104	0.042238	0.215414	ENSMUSG00000014361(Mertk),ENSMUSG00000024610(Cd74),ENSMUSG00000026770(Il2ra),ENSMUSG00000031628(Casp3)	ENSMUSG00000046006(Gapt)
BP	GO:2001235	positive regulation of apoptotic signaling pathway	6	1	7	175	0.0423607	0.215855	ENSMUSG00000016524(Il19),ENSMUSG00000019979(Apaf1),ENSMUSG00000030560(Ctsc),ENSMUSG00000036986(Pml),ENSMUSG00000039304(Tnfsf10),ENSMUSG00000048806(Ifnb1)	ENSMUSG00000026883(Dab2ip)
BP	GO:0043066	negative regulation of apoptotic process	21	4	25	947	0.0428546	0.218185	ENSMUSG00000000184(Ccnd2),ENSMUSG00000014361(Mertk),ENSMUSG00000014773(Dll1),ENSMUSG00000016524(Il19),ENSMUSG00000021367(Edn1),ENSMUSG00000022684(Bfar),ENSMUSG00000024079(Eif2ak2),ENSMUSG00000024397(Aif1),ENSMUSG00000024610(Cd74),ENSMUSG00000024887(Asah2),ENSMUSG00000026535(Ifi202b),ENSMUSG00000026981(Il1rn),ENSMUSG00000031628(Casp3),ENSMUSG00000035352(Ccl12),ENSMUSG00000037944(Ccr7),ENSMUSG00000…	ENSMUSG00000028933(Xrcc2),ENSMUSG00000036867(Smad6),ENSMUSG00000042745(Id1),ENSMUSG00000056501(Cebpb)
BP	GO:0002292	T cell differentiation involved in immune response	4	0	4	72	0.0428995	0.218228	ENSMUSG00000004040(Stat3),ENSMUSG00000037944(Ccr7),ENSMUSG00000039899(Fgl2),ENSMUSG00000044701(Il27)	-
CC	GO:0044292	dendrite terminus	2	0	2	18	0.0437028	0.221462	ENSMUSG00000015222(Map2),ENSMUSG00000031292(Cdkl5)	-
BP	GO:0002707	negative regulation of lymphocyte mediated immunity	3	0	3	43	0.0437209	0.221462	ENSMUSG00000015316(Slamf1),ENSMUSG00000037321(Tap1),ENSMUSG00000048806(Ifnb1)	-
BP	GO:0051281	positive regulation of release of sequestered calcium ion into cytosol	3	0	3	43	0.0437209	0.221462	ENSMUSG00000029417(Cxcl9),ENSMUSG00000030147(Clec4b1),ENSMUSG00000034855(Cxcl10)	-
BP	GO:0097300	programmed necrotic cell death	3	0	3	43	0.0437209	0.221462	ENSMUSG00000012519(Mlkl),ENSMUSG00000027514(Zbp1),ENSMUSG00000031639(Tlr3)	-
BP	GO:1903672	positive regulation of sprouting angiogenesis	3	0	3	43	0.0437209	0.221462	ENSMUSG00000004698(Hdac9),ENSMUSG00000014773(Dll1),ENSMUSG00000062960(Kdr)	-
CC	GO:0005923	bicellular tight junction	6	0	6	137	0.0438531	0.221944	ENSMUSG00000026657(Frmd4a),ENSMUSG00000030064(Frmd4b),ENSMUSG00000040296(Ddx58),ENSMUSG00000048534(Jaml),ENSMUSG00000061859(Patj),ENSMUSG00000062232(Rapgef2)	-
BP	GO:0097190	apoptotic signaling pathway	15	2	17	589	0.0439544	0.222268	ENSMUSG00000016524(Il19),ENSMUSG00000019979(Apaf1),ENSMUSG00000024610(Cd74),ENSMUSG00000024887(Asah2),ENSMUSG00000026222(Sp100),ENSMUSG00000030560(Ctsc),ENSMUSG00000031628(Casp3),ENSMUSG00000031639(Tlr3),ENSMUSG00000035683(Melk),ENSMUSG00000036986(Pml),ENSMUSG00000039304(Tnfsf10),ENSMUSG00000048806(Ifnb1),ENSMUSG00000073489(Ifi204),ENSMUSG00000079017(Ifi27l2a),ENSMUSG00000117975(Itprip)	ENSMUSG00000026883(Dab2ip),ENSMUSG00000056501(Cebpb)
BP	GO:1901698	response to nitrogen compound	29	1	30	1183	0.0443407	0.224031	ENSMUSG00000001552(Jup),ENSMUSG00000002307(Daxx),ENSMUSG00000004040(Stat3),ENSMUSG00000004698(Hdac9),ENSMUSG00000020464(Pnpt1),ENSMUSG00000021127(Zfp36l1),ENSMUSG00000021367(Edn1),ENSMUSG00000024238(Zeb1),ENSMUSG00000024397(Aif1),ENSMUSG00000026360(Rgs2),ENSMUSG00000026581(Sell),ENSMUSG00000026896(Ifih1),ENSMUSG00000031628(Casp3),ENSMUSG00000031639(Tlr3),ENSMUSG00000033871(Ppargc1b),ENSMUSG000000…	ENSMUSG00000056501(Cebpb)
BP	GO:0045766	positive regulation of angiogenesis	7	0	7	177	0.044568	0.224989	ENSMUSG00000001552(Jup),ENSMUSG00000004040(Stat3),ENSMUSG00000004698(Hdac9),ENSMUSG00000014773(Dll1),ENSMUSG00000031639(Tlr3),ENSMUSG00000033470(Cysltr2),ENSMUSG00000062960(Kdr)	-
BP	GO:0060191	regulation of lipase activity	4	0	4	73	0.0447581	0.225758	ENSMUSG00000004698(Hdac9),ENSMUSG00000022901(Cd86),ENSMUSG00000026360(Rgs2),ENSMUSG00000034997(Htr2a)	-
MF	GO:0042288	MHC class I protein binding	2	0	2	19	0.0448728	0.226145	ENSMUSG00000030149(Klrk1),ENSMUSG00000037321(Tap1)	-
BP	GO:0031329	regulation of cellular catabolic process	18	2	20	724	0.0449316	0.22625	ENSMUSG00000002227(Mov10),ENSMUSG00000004040(Stat3),ENSMUSG00000019979(Apaf1),ENSMUSG00000020464(Pnpt1),ENSMUSG00000021127(Zfp36l1),ENSMUSG00000030560(Ctsc),ENSMUSG00000030921(Trim30a),ENSMUSG00000034997(Htr2a),ENSMUSG00000036986(Pml),ENSMUSG00000038058(Nod1),ENSMUSG00000044786(Zfp36),ENSMUSG00000045322(Tlr9),ENSMUSG00000046879(Irgm1),ENSMUSG00000054072(Iigp1),ENSMUSG00000057596(Trim30d),ENSMUSG0…	ENSMUSG00000026883(Dab2ip),ENSMUSG00000055485(Soga1)
BP	GO:0002705	positive regulation of leukocyte mediated immunity	6	0	6	141	0.045278	0.227803	ENSMUSG00000015947(Fcgr1),ENSMUSG00000020641(Rsad2),ENSMUSG00000030149(Klrk1),ENSMUSG00000037447(Arid5a),ENSMUSG00000040296(Ddx58),ENSMUSG00000057135(Scimp)	-
[truncated: 4,781 more rows]
