# Supplementary material for: Transcriptomics and quantitative proteomics reveal changes after second stimulation of bone marrow-derived macrophages from lupus-prone MRL/lpr mice
Source: Front Immunol. 2022 Oct 19;13:1004232. doi: 10.3389/fimmu.2022.1004232 (PMC9627492; doi:10.3389/fimmu.2022.1004232)
Supplement: Supplementary file 11 [file Table_11.xlsx]

## Sheet: Sheet1
PathwayID	Pathway	Level1	Level2	Up_number	Down_number	DEG_number	total_number	Pvalue	FDR	Up_gene	Down_gene	URL
mmu05168	Herpes simplex infection	Human Diseases	Infectious diseases: Viral	28	1	29	205	1.47174e-17	3.06123e-15	ENSMUSG00000056116(H2-T22),ENSMUSG00000034459(Ifit1),ENSMUSG00000026222(Sp100),ENSMUSG00000040296(Ddx58),ENSMUSG00000066861(Oas1g),ENSMUSG00000032661(Oas3),ENSMUSG00000031639(Tlr3),ENSMUSG00000079339(Ifit1bl1),ENSMUSG00000053835(H2-T24),ENSMUSG00000060586(H2-Eb1),ENSMUSG00000079547(H2-DMb1),ENSMUSG00000048806(Ifnb1),ENSMUSG00000025498(Irf7),ENSMUSG00000035929(H2-Q4),ENSMUSG00000024079(Eif2ak2),EN…	ENSMUSG00000043866(Taf10)	http://www.kegg.jp/kegg-bin/show_pathway?map05168/K06751%09%23FFFFFF,red/K10054%09%23FFFFFF,red/K05401%09%23FFFFFF,red/K06752%09%23FFFFFF,red/K10161%09%23FFFFFF,red/K16195%09%23FFFFFF,red/K05433%09%23FFFFFF,red/K03134%09%23FFFFFF,green/K02308%09%23FFFFFF,red/K05653%09%23FFFFFF,red/K09447%09%23FFFFFF,red/K11220%09%23FFFFFF,red/K05415%09%23FFFFFF,red/K14217%09%23FFFFFF,red/K14624%09%23FFFFFF,red/K1…
mmu05164	Influenza A	Human Diseases	Infectious diseases: Viral	19	0	19	171	4.70453e-10	4.89271e-08	ENSMUSG00000040296(Ddx58),ENSMUSG00000044583(Tlr7),ENSMUSG00000031639(Tlr3),ENSMUSG00000032661(Oas3),ENSMUSG00000066861(Oas1g),ENSMUSG00000039304(Tnfsf10),ENSMUSG00000034855(Cxcl10),ENSMUSG00000079547(H2-DMb1),ENSMUSG00000060586(H2-Eb1),ENSMUSG00000048806(Ifnb1),ENSMUSG00000024079(Eif2ak2),ENSMUSG00000025498(Irf7),ENSMUSG00000036986(Pml),ENSMUSG00000036594(H2-Aa),ENSMUSG00000026104(Stat1),ENSMUSG…	-	http://www.kegg.jp/kegg-bin/show_pathway?map05164/K14624%09%23FFFFFF,red/K12647%09%23FFFFFF,red/K12646%09%23FFFFFF,red/K06752%09%23FFFFFF,red/K09447%09%23FFFFFF,red/K16195%09%23FFFFFF,red/K12671%09%23FFFFFF,red/K04721%09%23FFFFFF,red/K05404%09%23FFFFFF,red/K05415%09%23FFFFFF,red/K05401%09%23FFFFFF,red/K10054%09%23FFFFFF,red/K14216%09%23FFFFFF,red/K11220%09%23FFFFFF,red/K15045%09%23FFFFFF,red/
mmu05169	Epstein-Barr virus infection	Human Diseases	Infectious diseases: Viral	21	0	21	219	8.75511e-10	6.07021e-08	ENSMUSG00000073421(H2-Ab1),ENSMUSG00000000184(Ccnd2),ENSMUSG00000035692(Isg15),ENSMUSG00000034855(Cxcl10),ENSMUSG00000053835(H2-T24),ENSMUSG00000060586(H2-Eb1),ENSMUSG00000037321(Tap1),ENSMUSG00000079547(H2-DMb1),ENSMUSG00000048806(Ifnb1),ENSMUSG00000025498(Irf7),ENSMUSG00000024079(Eif2ak2),ENSMUSG00000035929(H2-Q4),ENSMUSG00000056116(H2-T22),ENSMUSG00000040296(Ddx58),ENSMUSG00000036594(H2-Aa),EN…	-	http://www.kegg.jp/kegg-bin/show_pathway?map05169/K06752%09%23FFFFFF,red/K05653%09%23FFFFFF,red/K04692%09%23FFFFFF,red/K14216%09%23FFFFFF,red/K11220%09%23FFFFFF,red/K06751%09%23FFFFFF,red/K12671%09%23FFFFFF,red/K12646%09%23FFFFFF,red/K10151%09%23FFFFFF,red/K02084%09%23FFFFFF,red/K02187%09%23FFFFFF,red/K05415%09%23FFFFFF,red/K12159%09%23FFFFFF,red/K16195%09%23FFFFFF,red/K09447%09%23FFFFFF,red/
mmu05162	Measles	Human Diseases	Infectious diseases: Viral	15	0	15	134	2.98994e-08	1.55477e-06	ENSMUSG00000026104(Stat1),ENSMUSG00000024079(Eif2ak2),ENSMUSG00000025498(Irf7),ENSMUSG00000026896(Ifih1),ENSMUSG00000026770(Il2ra),ENSMUSG00000045322(Tlr9),ENSMUSG00000015316(Slamf1),ENSMUSG00000044583(Tlr7),ENSMUSG00000066861(Oas1g),ENSMUSG00000032661(Oas3),ENSMUSG00000004040(Stat3),ENSMUSG00000040296(Ddx58),ENSMUSG00000048806(Ifnb1),ENSMUSG00000039304(Tnfsf10),ENSMUSG00000000184(Ccnd2)	-	http://www.kegg.jp/kegg-bin/show_pathway?map05162/K04721%09%23FFFFFF,red/K05404%09%23FFFFFF,red/K11220%09%23FFFFFF,red/K04692%09%23FFFFFF,red/K09447%09%23FFFFFF,red/K14216%09%23FFFFFF,red/K10151%09%23FFFFFF,red/K05068%09%23FFFFFF,red/K05415%09%23FFFFFF,red/K06536%09%23FFFFFF,red/K16195%09%23FFFFFF,red/K10161%09%23FFFFFF,red/K12647%09%23FFFFFF,red/K12646%09%23FFFFFF,red/
mmu05150	Staphylococcus aureus infection	Human Diseases	Infectious diseases: Bacterial	10	0	10	55	6.07684e-08	2.52796e-06	ENSMUSG00000060586(H2-Eb1),ENSMUSG00000079547(H2-DMb1),ENSMUSG00000036887(C1qa),ENSMUSG00000073418(C4b),ENSMUSG00000015947(Fcgr1),ENSMUSG00000073421(H2-Ab1),ENSMUSG00000030786(Itgam),ENSMUSG00000059089(Fcgr4),ENSMUSG00000036905(C1qb),ENSMUSG00000036594(H2-Aa)	-	http://www.kegg.jp/kegg-bin/show_pathway?map05150/K06498%09%23FFFFFF,red/K03987%09%23FFFFFF,red/K06463%09%23FFFFFF,red/K06461%09%23FFFFFF,red/K03986%09%23FFFFFF,red/K03989%09%23FFFFFF,red/K06752%09%23FFFFFF,red/
mmu05160	Hepatitis C	Human Diseases	Infectious diseases: Viral	15	0	15	159	2.92439e-07	1.01379e-05	ENSMUSG00000020641(Rsad2),ENSMUSG00000019979(Apaf1),ENSMUSG00000031628(Casp3),ENSMUSG00000026104(Stat1),ENSMUSG00000025498(Irf7),ENSMUSG00000024079(Eif2ak2),ENSMUSG00000048806(Ifnb1),ENSMUSG00000034855(Cxcl10),ENSMUSG00000079339(Ifit1bl1),ENSMUSG00000004040(Stat3),ENSMUSG00000032661(Oas3),ENSMUSG00000066861(Oas1g),ENSMUSG00000031639(Tlr3),ENSMUSG00000040296(Ddx58),ENSMUSG00000034459(Ifit1)	-	http://www.kegg.jp/kegg-bin/show_pathway?map05160/K02084%09%23FFFFFF,red/K04692%09%23FFFFFF,red/K11220%09%23FFFFFF,red/K14216%09%23FFFFFF,red/K16195%09%23FFFFFF,red/K14217%09%23FFFFFF,red/K15045%09%23FFFFFF,red/K12671%09%23FFFFFF,red/K05401%09%23FFFFFF,red/K09447%09%23FFFFFF,red/K05415%09%23FFFFFF,red/K02187%09%23FFFFFF,red/K12646%09%23FFFFFF,red/
mmu04668	TNF signaling pathway	Environmental Information Processing	Signal transduction	10	2	12	108	7.98632e-07	2.37308e-05	ENSMUSG00000058163(Gm5431),ENSMUSG00000034855(Cxcl10),ENSMUSG00000053007(Creb5),ENSMUSG00000048806(Ifnb1),ENSMUSG00000021367(Edn1),ENSMUSG00000031628(Casp3),ENSMUSG00000035352(Ccl12),ENSMUSG00000012519(Mlkl),ENSMUSG00000078920(Ifi47),ENSMUSG00000031712(Il15)	ENSMUSG00000056501(Cebpb),ENSMUSG00000026883(Dab2ip)	http://www.kegg.jp/kegg-bin/show_pathway?map04668/K02187%09%23FFFFFF,red/K05433%09%23FFFFFF,red/K16366%09%23FFFFFF,red/K12671%09%23FFFFFF,red/K09047%09%23FFFFFF,red/K19901%09%23FFFFFF,green/K14624%09%23FFFFFF,red/K08849%09%23FFFFFF,red/K05415%09%23FFFFFF,red/K17072%09%23FFFFFF,red/K10048%09%23FFFFFF,green/
mmu05152	Tuberculosis	Human Diseases	Infectious diseases: Bacterial	14	1	15	178	1.24775e-06	3.24414e-05	ENSMUSG00000079547(H2-DMb1),ENSMUSG00000060586(H2-Eb1),ENSMUSG00000048806(Ifnb1),ENSMUSG00000059089(Fcgr4),ENSMUSG00000054580(Pla2r1),ENSMUSG00000015947(Fcgr1),ENSMUSG00000045322(Tlr9),ENSMUSG00000073421(H2-Ab1),ENSMUSG00000030786(Itgam),ENSMUSG00000026104(Stat1),ENSMUSG00000031628(Casp3),ENSMUSG00000024610(Cd74),ENSMUSG00000019979(Apaf1),ENSMUSG00000036594(H2-Aa)	ENSMUSG00000056501(Cebpb)	http://www.kegg.jp/kegg-bin/show_pathway?map05152/K06505%09%23FFFFFF,red/K06498%09%23FFFFFF,red/K10048%09%23FFFFFF,green/K06463%09%23FFFFFF,red/K02084%09%23FFFFFF,red/K06461%09%23FFFFFF,red/K06752%09%23FFFFFF,red/K11220%09%23FFFFFF,red/K02187%09%23FFFFFF,red/K10161%09%23FFFFFF,red/K06560%09%23FFFFFF,red/K05415%09%23FFFFFF,red/
mmu05332	Graft-versus-host disease	Human Diseases	Immune diseases	8	0	8	50	3.61363e-06	8.35149e-05	ENSMUSG00000073421(H2-Ab1),ENSMUSG00000035929(H2-Q4),ENSMUSG00000036594(H2-Aa),ENSMUSG00000060586(H2-Eb1),ENSMUSG00000079547(H2-DMb1),ENSMUSG00000053835(H2-T24),ENSMUSG00000056116(H2-T22),ENSMUSG00000022901(Cd86)	-	http://www.kegg.jp/kegg-bin/show_pathway?map05332/K06752%09%23FFFFFF,red/K05413%09%23FFFFFF,red/K06751%09%23FFFFFF,red/
mmu05330	Allograft rejection	Human Diseases	Immune diseases	8	0	8	53	5.68356e-06	0.000112752	ENSMUSG00000036594(H2-Aa),ENSMUSG00000035929(H2-Q4),ENSMUSG00000056116(H2-T22),ENSMUSG00000022901(Cd86),ENSMUSG00000073421(H2-Ab1),ENSMUSG00000060586(H2-Eb1),ENSMUSG00000079547(H2-DMb1),ENSMUSG00000053835(H2-T24)	-	http://www.kegg.jp/kegg-bin/show_pathway?map05330/K06752%09%23FFFFFF,red/K05413%09%23FFFFFF,red/K06751%09%23FFFFFF,red/
mmu05145	Toxoplasmosis	Human Diseases	Infectious diseases: Parasitic	11	0	11	109	5.96282e-06	0.000112752	ENSMUSG00000079547(H2-DMb1),ENSMUSG00000060586(H2-Eb1),ENSMUSG00000078853(Igtp),ENSMUSG00000079227(Ccr5),ENSMUSG00000069874(Irgm2),ENSMUSG00000073421(H2-Ab1),ENSMUSG00000004040(Stat3),ENSMUSG00000031628(Casp3),ENSMUSG00000026104(Stat1),ENSMUSG00000046879(Irgm1),ENSMUSG00000036594(H2-Aa)	-	http://www.kegg.jp/kegg-bin/show_pathway?map05145/K14140%09%23FFFFFF,red/K11220%09%23FFFFFF,red/K04180%09%23FFFFFF,red/K06752%09%23FFFFFF,red/K02187%09%23FFFFFF,red/K14139%09%23FFFFFF,red/K04692%09%23FFFFFF,red/
mmu04514	Cell adhesion molecules (CAMs)	Environmental Information Processing	Signaling molecules and interaction	13	0	13	158	8.35291e-06	0.000144784	ENSMUSG00000049939(Lrrc4),ENSMUSG00000027322(Siglec1),ENSMUSG00000053835(H2-T24),ENSMUSG00000079547(H2-DMb1),ENSMUSG00000060586(H2-Eb1),ENSMUSG00000073421(H2-Ab1),ENSMUSG00000030786(Itgam),ENSMUSG00000022901(Cd86),ENSMUSG00000026581(Sell),ENSMUSG00000020717(Pecam1),ENSMUSG00000035929(H2-Q4),ENSMUSG00000056116(H2-T22),ENSMUSG00000036594(H2-Aa)	-	http://www.kegg.jp/kegg-bin/show_pathway?map04514/K06548%09%23FFFFFF,red/K06471%09%23FFFFFF,red/K06751%09%23FFFFFF,red/K16351%09%23FFFFFF,red/K05413%09%23FFFFFF,red/K06752%09%23FFFFFF,red/K06461%09%23FFFFFF,red/K06495%09%23FFFFFF,red/
mmu05167	Kaposi's sarcoma-associated herpesvirus infection	Human Diseases	Infectious diseases: Viral	14	1	15	209	9.06744e-06	0.000145079	ENSMUSG00000053835(H2-T24),ENSMUSG00000048806(Ifnb1),ENSMUSG00000079227(Ccr5),ENSMUSG00000044786(Zfp36),ENSMUSG00000026104(Stat1),ENSMUSG00000022901(Cd86),ENSMUSG00000031639(Tlr3),ENSMUSG00000031628(Casp3),ENSMUSG00000004040(Stat3),ENSMUSG00000025498(Irf7),ENSMUSG00000024079(Eif2ak2),ENSMUSG00000035929(H2-Q4),ENSMUSG00000056116(H2-T22),ENSMUSG00000027669(Gnb4)	ENSMUSG00000038607(Gng10)	http://www.kegg.jp/kegg-bin/show_pathway?map05167/K04180%09%23FFFFFF,red/K16195%09%23FFFFFF,red/K06751%09%23FFFFFF,red/K05415%09%23FFFFFF,red/K05413%09%23FFFFFF,red/K04545%09%23FFFFFF,green/K02187%09%23FFFFFF,red/K11220%09%23FFFFFF,red/K05401%09%23FFFFFF,red/K15308%09%23FFFFFF,red/K04538%09%23FFFFFF,red/K04692%09%23FFFFFF,red/K09447%09%23FFFFFF,red/
mmu04672	Intestinal immune network for IgA production	Organismal Systems	Immune system	7	0	7	42	1.12514e-05	0.000159451	ENSMUSG00000060586(H2-Eb1),ENSMUSG00000079547(H2-DMb1),ENSMUSG00000073421(H2-Ab1),ENSMUSG00000031712(Il15),ENSMUSG00000022901(Cd86),ENSMUSG00000023206(Il15ra),ENSMUSG00000036594(H2-Aa)	-	http://www.kegg.jp/kegg-bin/show_pathway?map04672/K05433%09%23FFFFFF,red/K05413%09%23FFFFFF,red/K06752%09%23FFFFFF,red/K05074%09%23FFFFFF,red/
mmu05416	Viral myocarditis	Human Diseases	Cardiovascular diseases	9	0	9	76	1.14989e-05	0.000159451	ENSMUSG00000031628(Casp3),ENSMUSG00000022901(Cd86),ENSMUSG00000035929(H2-Q4),ENSMUSG00000056116(H2-T22),ENSMUSG00000036594(H2-Aa),ENSMUSG00000079547(H2-DMb1),ENSMUSG00000060586(H2-Eb1),ENSMUSG00000053835(H2-T24),ENSMUSG00000073421(H2-Ab1)	-	http://www.kegg.jp/kegg-bin/show_pathway?map05416/K05413%09%23FFFFFF,red/K06752%09%23FFFFFF,red/K06751%09%23FFFFFF,red/K02187%09%23FFFFFF,red/
mmu05321	Inflammatory bowel disease (IBD)	Human Diseases	Immune diseases	8	0	8	59	1.29075e-05	0.000167798	ENSMUSG00000036594(H2-Aa),ENSMUSG00000030745(Il21r),ENSMUSG00000026104(Stat1),ENSMUSG00000073421(H2-Ab1),ENSMUSG00000004040(Stat3),ENSMUSG00000055435(Maf),ENSMUSG00000060586(H2-Eb1),ENSMUSG00000079547(H2-DMb1)	-	http://www.kegg.jp/kegg-bin/show_pathway?map05321/K05075%09%23FFFFFF,red/K11220%09%23FFFFFF,red/K06752%09%23FFFFFF,red/K09035%09%23FFFFFF,red/K04692%09%23FFFFFF,red/
mmu04940	Type I diabetes mellitus	Human Diseases	Endocrine and metabolic diseases	8	0	8	60	1.46551e-05	0.000173191	ENSMUSG00000079547(H2-DMb1),ENSMUSG00000060586(H2-Eb1),ENSMUSG00000053835(H2-T24),ENSMUSG00000073421(H2-Ab1),ENSMUSG00000022901(Cd86),ENSMUSG00000035929(H2-Q4),ENSMUSG00000056116(H2-T22),ENSMUSG00000036594(H2-Aa)	-	http://www.kegg.jp/kegg-bin/show_pathway?map04940/K06752%09%23FFFFFF,red/K05413%09%23FFFFFF,red/K06751%09%23FFFFFF,red/
mmu04621	NOD-like receptor signaling pathway	Organismal Systems	Immune system	13	0	13	167	1.52038e-05	0.000173191	ENSMUSG00000026104(Stat1),ENSMUSG00000066861(Oas1g),ENSMUSG00000032661(Oas3),ENSMUSG00000073489(Ifi204),ENSMUSG00000025498(Irf7),ENSMUSG00000040253(Gbp7),ENSMUSG00000037860(Aim2),ENSMUSG00000038058(Nod1),ENSMUSG00000040264(Gbp2b),ENSMUSG00000028268(Gbp3),ENSMUSG00000048806(Ifnb1),ENSMUSG00000028270(Gbp2),ENSMUSG00000035352(Ccl12)	-	http://www.kegg.jp/kegg-bin/show_pathway?map04621/K20914%09%23FFFFFF,red/K20899%09%23FFFFFF,red/K14624%09%23FFFFFF,red/K12966%09%23FFFFFF,red/K09447%09%23FFFFFF,red/K14216%09%23FFFFFF,red/K05415%09%23FFFFFF,red/K08727%09%23FFFFFF,red/K11220%09%23FFFFFF,red/K20897%09%23FFFFFF,red/
mmu04612	Antigen processing and presentation	Organismal Systems	Immune system	9	0	9	79	1.58204e-05	0.000173191	ENSMUSG00000053835(H2-T24),ENSMUSG00000060586(H2-Eb1),ENSMUSG00000079547(H2-DMb1),ENSMUSG00000037321(Tap1),ENSMUSG00000073421(H2-Ab1),ENSMUSG00000024610(Cd74),ENSMUSG00000056116(H2-T22),ENSMUSG00000035929(H2-Q4),ENSMUSG00000036594(H2-Aa)	-	http://www.kegg.jp/kegg-bin/show_pathway?map04612/K05653%09%23FFFFFF,red/K06505%09%23FFFFFF,red/K06752%09%23FFFFFF,red/K06751%09%23FFFFFF,red/
mmu04060	Cytokine-cytokine receptor interaction	Environmental Information Processing	Signaling molecules and interaction	16	1	17	286	2.74811e-05	0.000285804	ENSMUSG00000030745(Il21r),ENSMUSG00000023206(Il15ra),ENSMUSG00000029417(Cxcl9),ENSMUSG00000009185(Ccl8),ENSMUSG00000044701(Il27),ENSMUSG00000048806(Ifnb1),ENSMUSG00000016524(Il19),ENSMUSG00000050395(Tnfsf15),ENSMUSG00000031712(Il15),ENSMUSG00000037944(Ccr7),ENSMUSG00000079227(Ccr5),ENSMUSG00000034855(Cxcl10),ENSMUSG00000026770(Il2ra),ENSMUSG00000039304(Tnfsf10),ENSMUSG00000026981(Il1rn),ENSMUSG00…	ENSMUSG00000023915(Tnfrsf21)	http://www.kegg.jp/kegg-bin/show_pathway?map04060/K05444%09%23FFFFFF,red/K05478%09%23FFFFFF,red/K05074%09%23FFFFFF,red/K05415%09%23FFFFFF,red/K22629%09%23FFFFFF,red/K05433%09%23FFFFFF,red/K05157%09%23FFFFFF,green/K04721%09%23FFFFFF,red/K12671%09%23FFFFFF,red/K05481%09%23FFFFFF,red/K05075%09%23FFFFFF,red/K04180%09%23FFFFFF,red/K14624%09%23FFFFFF,red/K05068%09%23FFFFFF,red/K16596%09%23FFFFFF,red/K0…
mmu05140	Leishmaniasis	Human Diseases	Infectious diseases: Parasitic	8	0	8	67	3.33735e-05	0.000330557	ENSMUSG00000015947(Fcgr1),ENSMUSG00000073421(H2-Ab1),ENSMUSG00000030786(Itgam),ENSMUSG00000026104(Stat1),ENSMUSG00000036594(H2-Aa),ENSMUSG00000079547(H2-DMb1),ENSMUSG00000060586(H2-Eb1),ENSMUSG00000059089(Fcgr4)	-	http://www.kegg.jp/kegg-bin/show_pathway?map05140/K11220%09%23FFFFFF,red/K06498%09%23FFFFFF,red/K06461%09%23FFFFFF,red/K06752%09%23FFFFFF,red/K06463%09%23FFFFFF,red/
mmu05320	Autoimmune thyroid disease	Human Diseases	Immune diseases	8	0	8	69	4.14282e-05	0.000391684	ENSMUSG00000056116(H2-T22),ENSMUSG00000022901(Cd86),ENSMUSG00000060586(H2-Eb1),ENSMUSG00000079547(H2-DMb1),ENSMUSG00000053835(H2-T24),ENSMUSG00000036594(H2-Aa),ENSMUSG00000035929(H2-Q4),ENSMUSG00000073421(H2-Ab1)	-	http://www.kegg.jp/kegg-bin/show_pathway?map05320/K06752%09%23FFFFFF,red/K06751%09%23FFFFFF,red/K05413%09%23FFFFFF,red/
mmu05322	Systemic lupus erythematosus	Human Diseases	Immune diseases	10	1	11	140	6.32606e-05	0.000572096	ENSMUSG00000022901(Cd86),ENSMUSG00000036905(C1qb),ENSMUSG00000059089(Fcgr4),ENSMUSG00000036887(C1qa),ENSMUSG00000060586(H2-Eb1),ENSMUSG00000079547(H2-DMb1),ENSMUSG00000036594(H2-Aa),ENSMUSG00000073421(H2-Ab1),ENSMUSG00000073418(C4b),ENSMUSG00000015947(Fcgr1)	ENSMUSG00000069272(H2ac8)	http://www.kegg.jp/kegg-bin/show_pathway?map05322/K06498%09%23FFFFFF,red/K05413%09%23FFFFFF,red/K03989%09%23FFFFFF,red/K11251%09%23FFFFFF,green/K06752%09%23FFFFFF,red/K03986%09%23FFFFFF,red/K06463%09%23FFFFFF,red/K03987%09%23FFFFFF,red/
mmu04145	Phagosome	Cellular Processes	Transport and catabolism	12	0	12	169	7.93662e-05	0.00068784	ENSMUSG00000037321(Tap1),ENSMUSG00000054580(Pla2r1),ENSMUSG00000060586(H2-Eb1),ENSMUSG00000079547(H2-DMb1),ENSMUSG00000053835(H2-T24),ENSMUSG00000030786(Itgam),ENSMUSG00000073421(H2-Ab1),ENSMUSG00000015947(Fcgr1),ENSMUSG00000059089(Fcgr4),ENSMUSG00000036594(H2-Aa),ENSMUSG00000056116(H2-T22),ENSMUSG00000035929(H2-Q4)	-	http://www.kegg.jp/kegg-bin/show_pathway?map04145/K06751%09%23FFFFFF,red/K06498%09%23FFFFFF,red/K06752%09%23FFFFFF,red/K05653%09%23FFFFFF,red/K06560%09%23FFFFFF,red/K06461%09%23FFFFFF,red/K06463%09%23FFFFFF,red/
mmu04620	Toll-like receptor signaling pathway	Organismal Systems	Immune system	9	0	9	99	9.61608e-05	0.000800058	ENSMUSG00000048806(Ifnb1),ENSMUSG00000045322(Tlr9),ENSMUSG00000034855(Cxcl10),ENSMUSG00000044583(Tlr7),ENSMUSG00000026104(Stat1),ENSMUSG00000031639(Tlr3),ENSMUSG00000022901(Cd86),ENSMUSG00000025498(Irf7),ENSMUSG00000029417(Cxcl9)	-	http://www.kegg.jp/kegg-bin/show_pathway?map04620/K05401%09%23FFFFFF,red/K09447%09%23FFFFFF,red/K10161%09%23FFFFFF,red/K12671%09%23FFFFFF,red/K05416%09%23FFFFFF,red/K05404%09%23FFFFFF,red/K05413%09%23FFFFFF,red/K05415%09%23FFFFFF,red/K11220%09%23FFFFFF,red/
mmu05166	HTLV-I infection	Human Diseases	Infectious diseases: Viral	14	0	14	236	0.000143259	0.00114607	ENSMUSG00000036594(H2-Aa),ENSMUSG00000056116(H2-T22),ENSMUSG00000020415(Pttg1),ENSMUSG00000035929(H2-Q4),ENSMUSG00000044786(Zfp36),ENSMUSG00000023206(Il15ra),ENSMUSG00000053007(Creb5),ENSMUSG00000031712(Il15),ENSMUSG00000000184(Ccnd2),ENSMUSG00000073421(H2-Ab1),ENSMUSG00000026770(Il2ra),ENSMUSG00000079547(H2-DMb1),ENSMUSG00000060586(H2-Eb1),ENSMUSG00000053835(H2-T24)	-	http://www.kegg.jp/kegg-bin/show_pathway?map05166/K06635%09%23FFFFFF,red/K05074%09%23FFFFFF,red/K15308%09%23FFFFFF,red/K10151%09%23FFFFFF,red/K05068%09%23FFFFFF,red/K05433%09%23FFFFFF,red/K09047%09%23FFFFFF,red/K06752%09%23FFFFFF,red/K06751%09%23FFFFFF,red/
mmu04623	Cytosolic DNA-sensing pathway	Organismal Systems	Immune system	7	0	7	63	0.000165237	0.00127294	ENSMUSG00000040296(Ddx58),ENSMUSG00000025498(Irf7),ENSMUSG00000027514(Zbp1),ENSMUSG00000034855(Cxcl10),ENSMUSG00000026535(Ifi202b),ENSMUSG00000048806(Ifnb1),ENSMUSG00000037860(Aim2)	-	http://www.kegg.jp/kegg-bin/show_pathway?map04623/K05415%09%23FFFFFF,red/K12965%09%23FFFFFF,red/K12646%09%23FFFFFF,red/K12671%09%23FFFFFF,red/K12971%09%23FFFFFF,red/K12966%09%23FFFFFF,red/K09447%09%23FFFFFF,red/
mmu04658	Th1 and Th2 cell differentiation	Organismal Systems	Immune system	8	0	8	87	0.000216804	0.00161054	ENSMUSG00000026104(Stat1),ENSMUSG00000036594(H2-Aa),ENSMUSG00000014773(Dll1),ENSMUSG00000055435(Maf),ENSMUSG00000079547(H2-DMb1),ENSMUSG00000060586(H2-Eb1),ENSMUSG00000073421(H2-Ab1),ENSMUSG00000026770(Il2ra)	-	http://www.kegg.jp/kegg-bin/show_pathway?map04658/K06752%09%23FFFFFF,red/K05068%09%23FFFFFF,red/K06051%09%23FFFFFF,red/K11220%09%23FFFFFF,red/K09035%09%23FFFFFF,red/
mmu05203	Viral carcinogenesis	Human Diseases	Cancers: Overview	13	0	13	218	0.000234177	0.00167962	ENSMUSG00000079227(Ccr5),ENSMUSG00000053007(Creb5),ENSMUSG00000000184(Ccnd2),ENSMUSG00000053835(H2-T24),ENSMUSG00000027641(Rbl1),ENSMUSG00000004698(Hdac9),ENSMUSG00000056116(H2-T22),ENSMUSG00000025498(Irf7),ENSMUSG00000035929(H2-Q4),ENSMUSG00000024079(Eif2ak2),ENSMUSG00000026222(Sp100),ENSMUSG00000004040(Stat3),ENSMUSG00000031628(Casp3)	-	http://www.kegg.jp/kegg-bin/show_pathway?map05203/K02187%09%23FFFFFF,red/K06751%09%23FFFFFF,red/K04180%09%23FFFFFF,red/K10151%09%23FFFFFF,red/K09047%09%23FFFFFF,red/K11409%09%23FFFFFF,red/K15413%09%23FFFFFF,red/K16195%09%23FFFFFF,red/K09447%09%23FFFFFF,red/K04681%09%23FFFFFF,red/K04692%09%23FFFFFF,red/
mmu04622	RIG-I-like receptor signaling pathway	Organismal Systems	Immune system	7	0	7	70	0.00032043	0.00222165	ENSMUSG00000017830(Dhx58),ENSMUSG00000040296(Ddx58),ENSMUSG00000048806(Ifnb1),ENSMUSG00000034855(Cxcl10),ENSMUSG00000025498(Irf7),ENSMUSG00000035692(Isg15),ENSMUSG00000026896(Ifih1)	-	http://www.kegg.jp/kegg-bin/show_pathway?map04622/K12159%09%23FFFFFF,red/K12647%09%23FFFFFF,red/K12649%09%23FFFFFF,red/K12646%09%23FFFFFF,red/K05415%09%23FFFFFF,red/K09447%09%23FFFFFF,red/K12671%09%23FFFFFF,red/
mmu05161	Hepatitis B	Human Diseases	Infectious diseases: Viral	10	0	10	144	0.000371423	0.00249213	ENSMUSG00000053007(Creb5),ENSMUSG00000048806(Ifnb1),ENSMUSG00000040296(Ddx58),ENSMUSG00000004040(Stat3),ENSMUSG00000031639(Tlr3),ENSMUSG00000026896(Ifih1),ENSMUSG00000025498(Irf7),ENSMUSG00000026104(Stat1),ENSMUSG00000031628(Casp3),ENSMUSG00000019979(Apaf1)	-	http://www.kegg.jp/kegg-bin/show_pathway?map05161/K02187%09%23FFFFFF,red/K05401%09%23FFFFFF,red/K02084%09%23FFFFFF,red/K12646%09%23FFFFFF,red/K05415%09%23FFFFFF,red/K09047%09%23FFFFFF,red/K11220%09%23FFFFFF,red/K09447%09%23FFFFFF,red/K12647%09%23FFFFFF,red/K04692%09%23FFFFFF,red/
mmu05133	Pertussis	Human Diseases	Infectious diseases: Bacterial	7	0	7	76	0.000531449	0.00345442	ENSMUSG00000036905(C1qb),ENSMUSG00000031628(Casp3),ENSMUSG00000073418(C4b),ENSMUSG00000030786(Itgam),ENSMUSG00000041515(Irf8),ENSMUSG00000036887(C1qa),ENSMUSG00000038058(Nod1)	-	http://www.kegg.jp/kegg-bin/show_pathway?map05133/K08727%09%23FFFFFF,red/K03986%09%23FFFFFF,red/K03987%09%23FFFFFF,red/K10155%09%23FFFFFF,red/K02187%09%23FFFFFF,red/K03989%09%23FFFFFF,red/K06461%09%23FFFFFF,red/
mmu04659	Th17 cell differentiation	Organismal Systems	Immune system	8	0	8	102	0.000639897	0.00403329	ENSMUSG00000036594(H2-Aa),ENSMUSG00000026104(Stat1),ENSMUSG00000030745(Il21r),ENSMUSG00000004040(Stat3),ENSMUSG00000026770(Il2ra),ENSMUSG00000073421(H2-Ab1),ENSMUSG00000079547(H2-DMb1),ENSMUSG00000060586(H2-Eb1)	-	http://www.kegg.jp/kegg-bin/show_pathway?map04659/K06752%09%23FFFFFF,red/K11220%09%23FFFFFF,red/K05068%09%23FFFFFF,red/K05075%09%23FFFFFF,red/K04692%09%23FFFFFF,red/
mmu05323	Rheumatoid arthritis	Human Diseases	Immune diseases	7	0	7	82	0.000840623	0.00514264	ENSMUSG00000036594(H2-Aa),ENSMUSG00000022901(Cd86),ENSMUSG00000035352(Ccl12),ENSMUSG00000073421(H2-Ab1),ENSMUSG00000031712(Il15),ENSMUSG00000079547(H2-DMb1),ENSMUSG00000060586(H2-Eb1)	-	http://www.kegg.jp/kegg-bin/show_pathway?map05323/K06752%09%23FFFFFF,red/K14624%09%23FFFFFF,red/K05433%09%23FFFFFF,red/K05413%09%23FFFFFF,red/
mmu05310	Asthma	Human Diseases	Immune diseases	4	0	4	24	0.000937532	0.00557162	ENSMUSG00000073421(H2-Ab1),ENSMUSG00000036594(H2-Aa),ENSMUSG00000079547(H2-DMb1),ENSMUSG00000060586(H2-Eb1)	-	http://www.kegg.jp/kegg-bin/show_pathway?map05310/K06752%09%23FFFFFF,red/
mmu04217	Necroptosis	Cellular Processes	Cell growth and death	9	1	10	174	0.00160139	0.00907924	ENSMUSG00000027514(Zbp1),ENSMUSG00000026104(Stat1),ENSMUSG00000024079(Eif2ak2),ENSMUSG00000033847(Pla2g4c),ENSMUSG00000012519(Mlkl),ENSMUSG00000031639(Tlr3),ENSMUSG00000004040(Stat3),ENSMUSG00000048806(Ifnb1),ENSMUSG00000039304(Tnfsf10)	ENSMUSG00000069272(H2ac8)	http://www.kegg.jp/kegg-bin/show_pathway?map04217/K11220%09%23FFFFFF,red/K11251%09%23FFFFFF,green/K08849%09%23FFFFFF,red/K12965%09%23FFFFFF,red/K16342%09%23FFFFFF,red/K04721%09%23FFFFFF,red/K16195%09%23FFFFFF,red/K05415%09%23FFFFFF,red/K04692%09%23FFFFFF,red/K05401%09%23FFFFFF,red/
mmu04640	Hematopoietic cell lineage	Organismal Systems	Immune system	7	0	7	92	0.00165464	0.00907924	ENSMUSG00000026770(Il2ra),ENSMUSG00000015947(Fcgr1),ENSMUSG00000073421(H2-Ab1),ENSMUSG00000030786(Itgam),ENSMUSG00000079547(H2-DMb1),ENSMUSG00000060586(H2-Eb1),ENSMUSG00000036594(H2-Aa)	-	http://www.kegg.jp/kegg-bin/show_pathway?map04640/K06752%09%23FFFFFF,red/K06498%09%23FFFFFF,red/K06461%09%23FFFFFF,red/K05068%09%23FFFFFF,red/
mmu05221	Acute myeloid leukemia	Human Diseases	Cancers: Specific types	5	1	6	68	0.00165871	0.00907924	ENSMUSG00000001552(Jup),ENSMUSG00000004040(Stat3),ENSMUSG00000015947(Fcgr1),ENSMUSG00000030786(Itgam),ENSMUSG00000036986(Pml)	ENSMUSG00000034957(Cebpa)	http://www.kegg.jp/kegg-bin/show_pathway?map05221/K10054%09%23FFFFFF,red/K04692%09%23FFFFFF,red/K06461%09%23FFFFFF,red/K10056%09%23FFFFFF,red/K09055%09%23FFFFFF,green/K06498%09%23FFFFFF,red/
mmu04062	Chemokine signaling pathway	Organismal Systems	Immune system	9	1	10	186	0.0026138	0.0139403	ENSMUSG00000079227(Ccr5),ENSMUSG00000037944(Ccr7),ENSMUSG00000034855(Cxcl10),ENSMUSG00000035352(Ccl12),ENSMUSG00000027669(Gnb4),ENSMUSG00000009185(Ccl8),ENSMUSG00000029417(Cxcl9),ENSMUSG00000004040(Stat3),ENSMUSG00000026104(Stat1)	ENSMUSG00000038607(Gng10)	http://www.kegg.jp/kegg-bin/show_pathway?map04062/K16596%09%23FFFFFF,red/K04182%09%23FFFFFF,red/K04545%09%23FFFFFF,green/K04180%09%23FFFFFF,red/K05416%09%23FFFFFF,red/K12671%09%23FFFFFF,red/K11220%09%23FFFFFF,red/K14624%09%23FFFFFF,red/K04538%09%23FFFFFF,red/K04692%09%23FFFFFF,red/
mmu05144	Malaria	Human Diseases	Infectious diseases: Parasitic	5	0	5	54	0.00326653	0.0169859	ENSMUSG00000090523(Gypc),ENSMUSG00000030149(Klrk1),ENSMUSG00000020717(Pecam1),ENSMUSG00000035352(Ccl12),ENSMUSG00000045322(Tlr9)	-	http://www.kegg.jp/kegg-bin/show_pathway?map05144/K06576%09%23FFFFFF,red/K14624%09%23FFFFFF,red/K06728%09%23FFFFFF,red/K10161%09%23FFFFFF,red/K06471%09%23FFFFFF,red/
mmu04650	Natural killer cell mediated cytotoxicity	Organismal Systems	Immune system	8	0	8	133	0.00348873	0.0176989	ENSMUSG00000048806(Ifnb1),ENSMUSG00000053835(H2-T24),ENSMUSG00000039304(Tnfsf10),ENSMUSG00000059089(Fcgr4),ENSMUSG00000056116(H2-T22),ENSMUSG00000030149(Klrk1),ENSMUSG00000031628(Casp3),ENSMUSG00000035929(H2-Q4)	-	http://www.kegg.jp/kegg-bin/show_pathway?map04650/K06751%09%23FFFFFF,red/K06728%09%23FFFFFF,red/K04721%09%23FFFFFF,red/K02187%09%23FFFFFF,red/K06463%09%23FFFFFF,red/K05415%09%23FFFFFF,red/
mmu04630	Jak-STAT signaling pathway	Environmental Information Processing	Signal transduction	9	0	9	167	0.00415058	0.0205553	ENSMUSG00000031712(Il15),ENSMUSG00000026770(Il2ra),ENSMUSG00000030745(Il21r),ENSMUSG00000026104(Stat1),ENSMUSG00000000184(Ccnd2),ENSMUSG00000048806(Ifnb1),ENSMUSG00000016524(Il19),ENSMUSG00000004040(Stat3),ENSMUSG00000023206(Il15ra)	-	http://www.kegg.jp/kegg-bin/show_pathway?map04630/K05444%09%23FFFFFF,red/K05075%09%23FFFFFF,red/K11220%09%23FFFFFF,red/K05074%09%23FFFFFF,red/K05415%09%23FFFFFF,red/K05068%09%23FFFFFF,red/K10151%09%23FFFFFF,red/K04692%09%23FFFFFF,red/K05433%09%23FFFFFF,red/
mmu05202	Transcriptional misregulation in cancer	Human Diseases	Cancers: Overview	7	2	9	174	0.00541814	0.0262087	ENSMUSG00000015947(Fcgr1),ENSMUSG00000030786(Itgam),ENSMUSG00000000184(Ccnd2),ENSMUSG00000055435(Maf),ENSMUSG00000001552(Jup),ENSMUSG00000036986(Pml),ENSMUSG00000022901(Cd86)	ENSMUSG00000034957(Cebpa),ENSMUSG00000056501(Cebpb)	http://www.kegg.jp/kegg-bin/show_pathway?map05202/K10048%09%23FFFFFF,green/K09035%09%23FFFFFF,red/K09055%09%23FFFFFF,green/K06498%09%23FFFFFF,red/K06461%09%23FFFFFF,red/K05413%09%23FFFFFF,red/K10054%09%23FFFFFF,red/K10151%09%23FFFFFF,red/K10056%09%23FFFFFF,red/
mmu05165	Human papillomavirus infection	Human Diseases	Infectious diseases: Viral	14	0	14	349	0.00603178	0.0285139	ENSMUSG00000000184(Ccnd2),ENSMUSG00000035692(Isg15),ENSMUSG00000053007(Creb5),ENSMUSG00000027641(Rbl1),ENSMUSG00000053835(H2-T24),ENSMUSG00000048806(Ifnb1),ENSMUSG00000024079(Eif2ak2),ENSMUSG00000035929(H2-Q4),ENSMUSG00000056116(H2-T22),ENSMUSG00000061859(Patj),ENSMUSG00000026104(Stat1),ENSMUSG00000041827(Oasl1),ENSMUSG00000031639(Tlr3),ENSMUSG00000031628(Casp3)	-	http://www.kegg.jp/kegg-bin/show_pathway?map05165/K16195%09%23FFFFFF,red/K09047%09%23FFFFFF,red/K04681%09%23FFFFFF,red/K05401%09%23FFFFFF,red/K06092%09%23FFFFFF,red/K06751%09%23FFFFFF,red/K05415%09%23FFFFFF,red/K02187%09%23FFFFFF,red/K14608%09%23FFFFFF,red/K12159%09%23FFFFFF,red/K11220%09%23FFFFFF,red/K10151%09%23FFFFFF,red/
mmu04144	Endocytosis	Cellular Processes	Transport and catabolism	10	1	11	258	0.00926629	0.0428308	ENSMUSG00000056116(H2-T22),ENSMUSG00000035929(H2-Q4),ENSMUSG00000036995(Asap3),ENSMUSG00000036986(Pml),ENSMUSG00000027293(Ehd4),ENSMUSG00000026764(Kif5c),ENSMUSG00000034484(Snx2),ENSMUSG00000026770(Il2ra),ENSMUSG00000079227(Ccr5),ENSMUSG00000053835(H2-T24)	ENSMUSG00000037098(Rab11fip3)	http://www.kegg.jp/kegg-bin/show_pathway?map04144/K04180%09%23FFFFFF,red/K12477%09%23FFFFFF,red/K12488%09%23FFFFFF,red/K06751%09%23FFFFFF,red/K12485%09%23FFFFFF,green/K17917%09%23FFFFFF,red/K10396%09%23FFFFFF,red/K05068%09%23FFFFFF,red/K10054%09%23FFFFFF,red/
mmu00592	alpha-Linolenic acid metabolism	Metabolism	Lipid metabolism	2	1	3	24	0.00972047	0.0439534	ENSMUSG00000033847(Pla2g4c),ENSMUSG00000060675(Plaat3)	ENSMUSG00000027999(Pla2g12a)	http://www.kegg.jp/kegg-bin/show_pathway?map00592/K16817%09%23FFFFFF,red/K01047%09%23FFFFFF,green/K16342%09%23FFFFFF,red/
mmu04210	Apoptosis	Cellular Processes	Cell growth and death	6	1	7	135	0.0133474	0.0590695	ENSMUSG00000039304(Tnfsf10),ENSMUSG00000034573(Ptpn13),ENSMUSG00000002307(Daxx),ENSMUSG00000019979(Apaf1),ENSMUSG00000031628(Casp3),ENSMUSG00000030560(Ctsc)	ENSMUSG00000026883(Dab2ip)	http://www.kegg.jp/kegg-bin/show_pathway?map04210/K19901%09%23FFFFFF,green/K01275%09%23FFFFFF,red/K02187%09%23FFFFFF,red/K04721%09%23FFFFFF,red/K02308%09%23FFFFFF,red/K02374%09%23FFFFFF,red/K02084%09%23FFFFFF,red/
mmu03410	Base excision repair	Genetic Information Processing	Replication and repair	0	3	3	32	0.0213611	0.0925647	-	ENSMUSG00000038644(Pold1),ENSMUSG00000020974(Pole2),ENSMUSG00000030322(Mbd4)	http://www.kegg.jp/kegg-bin/show_pathway?map03410/K02325%09%23FFFFFF,green/K02327%09%23FFFFFF,green/K10801%09%23FFFFFF,green/
mmu04380	Osteoclast differentiation	Organismal Systems	Development	6	0	6	123	0.0277298	0.11771	ENSMUSG00000095028(Sirpb1b),ENSMUSG00000026104(Stat1),ENSMUSG00000059089(Fcgr4),ENSMUSG00000095788(Sirpb1a),ENSMUSG00000048806(Ifnb1),ENSMUSG00000015947(Fcgr1)	-	http://www.kegg.jp/kegg-bin/show_pathway?map04380/K06498%09%23FFFFFF,red/K06551%09%23FFFFFF,red/K11220%09%23FFFFFF,red/K06463%09%23FFFFFF,red/K05415%09%23FFFFFF,red/
mmu00051	Fructose and mannose metabolism	Metabolism	Carbohydrate metabolism	1	2	3	36	0.0291282	0.121173	ENSMUSG00000026773(Pfkfb3)	ENSMUSG00000026409(Pfkfb2),ENSMUSG00000022474(Pmm1)	http://www.kegg.jp/kegg-bin/show_pathway?map00051/K01103%09%23FFFFFF,red/K19029%09%23FFFFFF,green/K17497%09%23FFFFFF,green/
mmu04933	AGE-RAGE signaling pathway in diabetic complications	Human Diseases	Endocrine and metabolic diseases	5	0	5	99	0.037776	0.154067	ENSMUSG00000021367(Edn1),ENSMUSG00000004040(Stat3),ENSMUSG00000031628(Casp3),ENSMUSG00000026104(Stat1),ENSMUSG00000035352(Ccl12)	-	http://www.kegg.jp/kegg-bin/show_pathway?map04933/K14624%09%23FFFFFF,red/K04692%09%23FFFFFF,red/K16366%09%23FFFFFF,red/K02187%09%23FFFFFF,red/K11220%09%23FFFFFF,red/
mmu05142	Chagas disease (American trypanosomiasis)	Human Diseases	Infectious diseases: Parasitic	5	0	5	101	0.040622	0.159547	ENSMUSG00000045322(Tlr9),ENSMUSG00000035352(Ccl12),ENSMUSG00000048806(Ifnb1),ENSMUSG00000036887(C1qa),ENSMUSG00000036905(C1qb)	-	http://www.kegg.jp/kegg-bin/show_pathway?map05142/K14624%09%23FFFFFF,red/K05415%09%23FFFFFF,red/K03986%09%23FFFFFF,red/K03987%09%23FFFFFF,red/K10161%09%23FFFFFF,red/
mmu03440	Homologous recombination	Genetic Information Processing	Replication and repair	1	2	3	41	0.0406538	0.159547	ENSMUSG00000034329(Brip1)	ENSMUSG00000038644(Pold1),ENSMUSG00000028933(Xrcc2)	http://www.kegg.jp/kegg-bin/show_pathway?map03440/K15362%09%23FFFFFF,red/K10879%09%23FFFFFF,green/K02327%09%23FFFFFF,green/
mmu00565	Ether lipid metabolism	Metabolism	Lipid metabolism	2	1	3	46	0.0541373	0.208529	ENSMUSG00000033847(Pla2g4c),ENSMUSG00000060675(Plaat3)	ENSMUSG00000027999(Pla2g12a)	http://www.kegg.jp/kegg-bin/show_pathway?map00565/K16342%09%23FFFFFF,red/K01047%09%23FFFFFF,green/K16817%09%23FFFFFF,red/
mmu00380	Tryptophan metabolism	Metabolism	Amino acid metabolism	3	0	3	49	0.0631265	0.23447	ENSMUSG00000031549(Ido2),ENSMUSG00000035561(Aldh1b1),ENSMUSG00000026866(Kynu)	-	http://www.kegg.jp/kegg-bin/show_pathway?map00380/K00463%09%23FFFFFF,red/K00128%09%23FFFFFF,red/K01556%09%23FFFFFF,red/
mmu00591	Linoleic acid metabolism	Metabolism	Lipid metabolism	2	1	3	49	0.0631265	0.23447	ENSMUSG00000060675(Plaat3),ENSMUSG00000033847(Pla2g4c)	ENSMUSG00000027999(Pla2g12a)	http://www.kegg.jp/kegg-bin/show_pathway?map00591/K16817%09%23FFFFFF,red/K01047%09%23FFFFFF,green/K16342%09%23FFFFFF,red/
mmu05014	Amyotrophic lateral sclerosis (ALS)	Human Diseases	Neurodegenerative diseases	3	0	3	51	0.0694777	0.253533	ENSMUSG00000002307(Daxx),ENSMUSG00000031628(Casp3),ENSMUSG00000019979(Apaf1)	-	http://www.kegg.jp/kegg-bin/show_pathway?map05014/K02308%09%23FFFFFF,red/K02187%09%23FFFFFF,red/K02084%09%23FFFFFF,red/
mmu00340	Histidine metabolism	Metabolism	Amino acid metabolism	2	0	2	26	0.0840366	0.298572	ENSMUSG00000035561(Aldh1b1),ENSMUSG00000027360(Hdc)	-	http://www.kegg.jp/kegg-bin/show_pathway?map00340/K00128%09%23FFFFFF,red/K01590%09%23FFFFFF,red/
mmu04610	Complement and coagulation cascades	Organismal Systems	Immune system	4	0	4	89	0.0848486	0.298572	ENSMUSG00000036905(C1qb),ENSMUSG00000073418(C4b),ENSMUSG00000030786(Itgam),ENSMUSG00000036887(C1qa)	-	http://www.kegg.jp/kegg-bin/show_pathway?map04610/K06461%09%23FFFFFF,red/K03989%09%23FFFFFF,red/K03986%09%23FFFFFF,red/K03987%09%23FFFFFF,red/
mmu00240	Pyrimidine metabolism	Metabolism	Nucleotide metabolism	2	1	3	56	0.0865459	0.298572	ENSMUSG00000020638(Cmpk2),ENSMUSG00000029366(Dck)	ENSMUSG00000026575(Nme7)	http://www.kegg.jp/kegg-bin/show_pathway?map00240/K00893%09%23FFFFFF,red/K00940%09%23FFFFFF,green/K13809%09%23FFFFFF,red/
mmu04657	IL-17 signaling pathway	Organismal Systems	Immune system	3	1	4	90	0.087562	0.298572	ENSMUSG00000035352(Ccl12),ENSMUSG00000034855(Cxcl10),ENSMUSG00000031628(Casp3)	ENSMUSG00000056501(Cebpb)	http://www.kegg.jp/kegg-bin/show_pathway?map04657/K02187%09%23FFFFFF,red/K12671%09%23FFFFFF,red/K10048%09%23FFFFFF,green/K14624%09%23FFFFFF,red/
mmu05032	Morphine addiction	Human Diseases	Substance dependence	3	1	4	91	0.090317	0.302999	ENSMUSG00000030671(Pde3b),ENSMUSG00000027669(Gnb4),ENSMUSG00000019990(Pde7b)	ENSMUSG00000038607(Gng10)	http://www.kegg.jp/kegg-bin/show_pathway?map05032/K04545%09%23FFFFFF,green/K18436%09%23FFFFFF,red/K04538%09%23FFFFFF,red/K13296%09%23FFFFFF,red/
mmu05134	Legionellosis	Human Diseases	Infectious diseases: Bacterial	3	0	3	58	0.0938241	0.309769	ENSMUSG00000031628(Casp3),ENSMUSG00000019979(Apaf1),ENSMUSG00000030786(Itgam)	-	http://www.kegg.jp/kegg-bin/show_pathway?map05134/K06461%09%23FFFFFF,red/K02084%09%23FFFFFF,red/K02187%09%23FFFFFF,red/
mmu04726	Serotonergic synapse	Organismal Systems	Nervous system	4	1	5	131	0.0985659	0.320339	ENSMUSG00000027669(Gnb4),ENSMUSG00000031628(Casp3),ENSMUSG00000033847(Pla2g4c),ENSMUSG00000034997(Htr2a)	ENSMUSG00000038607(Gng10)	http://www.kegg.jp/kegg-bin/show_pathway?map04726/K04157%09%23FFFFFF,red/K16342%09%23FFFFFF,red/K04538%09%23FFFFFF,red/K02187%09%23FFFFFF,red/K04545%09%23FFFFFF,green/
mmu04218	Cellular senescence	Cellular Processes	Cell growth and death	6	0	6	172	0.10317	0.328737	ENSMUSG00000000184(Ccnd2),ENSMUSG00000027641(Rbl1),ENSMUSG00000053835(H2-T24),ENSMUSG00000035929(H2-Q4),ENSMUSG00000056116(H2-T22),ENSMUSG00000021127(Zfp36l1)	-	http://www.kegg.jp/kegg-bin/show_pathway?map04218/K18753%09%23FFFFFF,red/K06751%09%23FFFFFF,red/K10151%09%23FFFFFF,red/K04681%09%23FFFFFF,red/
mmu00564	Glycerophospholipid metabolism	Metabolism	Lipid metabolism	3	1	4	96	0.104702	0.328737	ENSMUSG00000030275(Etnk1),ENSMUSG00000060675(Plaat3),ENSMUSG00000033847(Pla2g4c)	ENSMUSG00000027999(Pla2g12a)	http://www.kegg.jp/kegg-bin/show_pathway?map00564/K16342%09%23FFFFFF,red/K00894%09%23FFFFFF,red/K16817%09%23FFFFFF,red/K01047%09%23FFFFFF,green/
mmu00230	Purine metabolism	Metabolism	Nucleotide metabolism	4	1	5	134	0.105891	0.328737	ENSMUSG00000023961(Enpp4),ENSMUSG00000029366(Dck),ENSMUSG00000030671(Pde3b),ENSMUSG00000019990(Pde7b)	ENSMUSG00000026575(Nme7)	http://www.kegg.jp/kegg-bin/show_pathway?map00230/K13296%09%23FFFFFF,red/K00893%09%23FFFFFF,red/K18424%09%23FFFFFF,red/K00940%09%23FFFFFF,green/K18436%09%23FFFFFF,red/
mmu00410	beta-Alanine metabolism	Metabolism	Metabolism of other amino acids	1	1	2	31	0.113283	0.346511	ENSMUSG00000035561(Aldh1b1)	ENSMUSG00000006442(Srm)	http://www.kegg.jp/kegg-bin/show_pathway?map00410/K00797%09%23FFFFFF,green/K00128%09%23FFFFFF,red/
mmu05200	Pathways in cancer	Human Diseases	Cancers: Overview	12	2	14	528	0.118711	0.35482	ENSMUSG00000036986(Pml),ENSMUSG00000027669(Gnb4),ENSMUSG00000001552(Jup),ENSMUSG00000031628(Casp3),ENSMUSG00000019979(Apaf1),ENSMUSG00000004040(Stat3),ENSMUSG00000023206(Il15ra),ENSMUSG00000026104(Stat1),ENSMUSG00000031712(Il15),ENSMUSG00000000184(Ccnd2),ENSMUSG00000026770(Il2ra),ENSMUSG00000014773(Dll1)	ENSMUSG00000038607(Gng10),ENSMUSG00000034957(Cebpa)	http://www.kegg.jp/kegg-bin/show_pathway?map05200/K11220%09%23FFFFFF,red/K04692%09%23FFFFFF,red/K05074%09%23FFFFFF,red/K05433%09%23FFFFFF,red/K04545%09%23FFFFFF,green/K05068%09%23FFFFFF,red/K10151%09%23FFFFFF,red/K02187%09%23FFFFFF,red/K09055%09%23FFFFFF,green/K10054%09%23FFFFFF,red/K04538%09%23FFFFFF,red/K10056%09%23FFFFFF,red/K06051%09%23FFFFFF,red/K02084%09%23FFFFFF,red/
mmu04215	Apoptosis - multiple species	Cellular Processes	Cell growth and death	2	0	2	32	0.119411	0.35482	ENSMUSG00000031628(Casp3),ENSMUSG00000019979(Apaf1)	-	http://www.kegg.jp/kegg-bin/show_pathway?map04215/K02187%09%23FFFFFF,red/K02084%09%23FFFFFF,red/
mmu05020	Prion diseases	Human Diseases	Neurodegenerative diseases	2	0	2	33	0.125619	0.368011	ENSMUSG00000036887(C1qa),ENSMUSG00000036905(C1qb)	-	http://www.kegg.jp/kegg-bin/show_pathway?map05020/K03987%09%23FFFFFF,red/K03986%09%23FFFFFF,red/
mmu05143	African trypanosomiasis	Human Diseases	Infectious diseases: Parasitic	2	0	2	34	0.131903	0.381052	ENSMUSG00000031549(Ido2),ENSMUSG00000045322(Tlr9)	-	http://www.kegg.jp/kegg-bin/show_pathway?map05143/K00463%09%23FFFFFF,red/K10161%09%23FFFFFF,red/
mmu03030	DNA replication	Genetic Information Processing	Replication and repair	0	2	2	35	0.138256	0.393936	-	ENSMUSG00000020974(Pole2),ENSMUSG00000038644(Pold1)	http://www.kegg.jp/kegg-bin/show_pathway?map03030/K02327%09%23FFFFFF,green/K02325%09%23FFFFFF,green/
mmu04931	Insulin resistance	Human Diseases	Endocrine and metabolic diseases	3	1	4	108	0.143064	0.402126	ENSMUSG00000053007(Creb5),ENSMUSG00000033871(Ppargc1b),ENSMUSG00000004040(Stat3)	ENSMUSG00000078937(Cpt1b)	http://www.kegg.jp/kegg-bin/show_pathway?map04931/K09047%09%23FFFFFF,red/K04692%09%23FFFFFF,red/K17962%09%23FFFFFF,red/K19523%09%23FFFFFF,green/
mmu04115	p53 signaling pathway	Cellular Processes	Cell growth and death	3	0	3	71	0.146573	0.406495	ENSMUSG00000031628(Casp3),ENSMUSG00000019979(Apaf1),ENSMUSG00000000184(Ccnd2)	-	http://www.kegg.jp/kegg-bin/show_pathway?map04115/K02187%09%23FFFFFF,red/K02084%09%23FFFFFF,red/K10151%09%23FFFFFF,red/
mmu05034	Alcoholism	Human Diseases	Substance dependence	4	2	6	193	0.152695	0.417903	ENSMUSG00000027669(Gnb4),ENSMUSG00000027018(Hat1),ENSMUSG00000004698(Hdac9),ENSMUSG00000053007(Creb5)	ENSMUSG00000038607(Gng10),ENSMUSG00000069272(H2ac8)	http://www.kegg.jp/kegg-bin/show_pathway?map05034/K11303%09%23FFFFFF,red/K09047%09%23FFFFFF,red/K04545%09%23FFFFFF,green/K11251%09%23FFFFFF,green/K11409%09%23FFFFFF,red/K04538%09%23FFFFFF,red/
mmu04917	Prolactin signaling pathway	Organismal Systems	Endocrine system	3	0	3	74	0.15989	0.431911	ENSMUSG00000026104(Stat1),ENSMUSG00000004040(Stat3),ENSMUSG00000000184(Ccnd2)	-	http://www.kegg.jp/kegg-bin/show_pathway?map04917/K10151%09%23FFFFFF,red/K11220%09%23FFFFFF,red/K04692%09%23FFFFFF,red/
mmu03420	Nucleotide excision repair	Genetic Information Processing	Replication and repair	0	2	2	43	0.191074	0.50308	-	ENSMUSG00000020974(Pole2),ENSMUSG00000038644(Pold1)	http://www.kegg.jp/kegg-bin/show_pathway?map03420/K02325%09%23FFFFFF,green/K02327%09%23FFFFFF,green/
mmu00600	Sphingolipid metabolism	Metabolism	Lipid metabolism	2	0	2	43	0.191074	0.50308	ENSMUSG00000021263(Degs2),ENSMUSG00000024887(Asah2)	-	http://www.kegg.jp/kegg-bin/show_pathway?map00600/K04712%09%23FFFFFF,red/K12349%09%23FFFFFF,red/
mmu04110	Cell cycle	Cellular Processes	Cell growth and death	3	1	4	122	0.193605	0.503374	ENSMUSG00000020415(Pttg1),ENSMUSG00000000184(Ccnd2),ENSMUSG00000027641(Rbl1)	ENSMUSG00000027379(Bub1)	http://www.kegg.jp/kegg-bin/show_pathway?map04110/K02178%09%23FFFFFF,green/K06635%09%23FFFFFF,red/K10151%09%23FFFFFF,red/K04681%09%23FFFFFF,red/
mmu04152	AMPK signaling pathway	Environmental Information Processing	Signal transduction	2	2	4	124	0.201242	0.51677	ENSMUSG00000053007(Creb5),ENSMUSG00000026773(Pfkfb3)	ENSMUSG00000078937(Cpt1b),ENSMUSG00000026409(Pfkfb2)	http://www.kegg.jp/kegg-bin/show_pathway?map04152/K01103%09%23FFFFFF,red/K19523%09%23FFFFFF,green/K09047%09%23FFFFFF,red/K19029%09%23FFFFFF,green/
mmu04350	TGF-beta signaling pathway	Environmental Information Processing	Signal transduction	1	2	3	84	0.206617	0.524103	ENSMUSG00000027641(Rbl1)	ENSMUSG00000042745(Id1),ENSMUSG00000036867(Smad6)	http://www.kegg.jp/kegg-bin/show_pathway?map04350/K04680%09%23FFFFFF,green/K04677%09%23FFFFFF,green/K04681%09%23FFFFFF,red/
mmu00590	Arachidonic acid metabolism	Metabolism	Lipid metabolism	2	1	3	85	0.211454	0.529909	ENSMUSG00000060675(Plaat3),ENSMUSG00000033847(Pla2g4c)	ENSMUSG00000027999(Pla2g12a)	http://www.kegg.jp/kegg-bin/show_pathway?map00590/K16342%09%23FFFFFF,red/K01047%09%23FFFFFF,green/K16817%09%23FFFFFF,red/
mmu04926	Relaxin signaling pathway	Organismal Systems	Endocrine system	3	1	4	129	0.220711	0.546522	ENSMUSG00000053007(Creb5),ENSMUSG00000027669(Gnb4),ENSMUSG00000021367(Edn1)	ENSMUSG00000038607(Gng10)	http://www.kegg.jp/kegg-bin/show_pathway?map04926/K04538%09%23FFFFFF,red/K16366%09%23FFFFFF,red/K09047%09%23FFFFFF,red/K04545%09%23FFFFFF,green/
mmu04728	Dopaminergic synapse	Organismal Systems	Nervous system	3	1	4	130	0.224664	0.549767	ENSMUSG00000053007(Creb5),ENSMUSG00000026764(Kif5c),ENSMUSG00000027669(Gnb4)	ENSMUSG00000038607(Gng10)	http://www.kegg.jp/kegg-bin/show_pathway?map04728/K04538%09%23FFFFFF,red/K09047%09%23FFFFFF,red/K10396%09%23FFFFFF,red/K04545%09%23FFFFFF,green/
mmu00520	Amino sugar and nucleotide sugar metabolism	Metabolism	Carbohydrate metabolism	0	2	2	50	0.239084	0.578249	-	ENSMUSG00000028621(Cyb5rl),ENSMUSG00000022474(Pmm1)	http://www.kegg.jp/kegg-bin/show_pathway?map00520/K00326%09%23FFFFFF,green/K17497%09%23FFFFFF,green/
mmu00071	Fatty acid degradation	Metabolism	Lipid metabolism	1	1	2	51	0.246006	0.588153	ENSMUSG00000035561(Aldh1b1)	ENSMUSG00000078937(Cpt1b)	http://www.kegg.jp/kegg-bin/show_pathway?map00071/K19523%09%23FFFFFF,green/K00128%09%23FFFFFF,red/
mmu04014	Ras signaling pathway	Environmental Information Processing	Signal transduction	4	2	6	231	0.262607	0.612244	ENSMUSG00000060675(Plaat3),ENSMUSG00000062960(Kdr),ENSMUSG00000033847(Pla2g4c),ENSMUSG00000027669(Gnb4)	ENSMUSG00000038607(Gng10),ENSMUSG00000027999(Pla2g12a)	http://www.kegg.jp/kegg-bin/show_pathway?map04014/K16817%09%23FFFFFF,red/K04538%09%23FFFFFF,red/K16342%09%23FFFFFF,red/K04545%09%23FFFFFF,green/K05098%09%23FFFFFF,red/K01047%09%23FFFFFF,green/
mmu05206	MicroRNAs in cancer	Human Diseases	Cancers: Overview	4	0	4	140	0.265101	0.612244	ENSMUSG00000024238(Zeb1),ENSMUSG00000004040(Stat3),ENSMUSG00000031628(Casp3),ENSMUSG00000000184(Ccnd2)	-	http://www.kegg.jp/kegg-bin/show_pathway?map05206/K10151%09%23FFFFFF,red/K09299%09%23FFFFFF,red/K02187%09%23FFFFFF,red/K04692%09%23FFFFFF,red/
mmu00330	Arginine and proline metabolism	Metabolism	Amino acid metabolism	1	1	2	54	0.266807	0.612244	ENSMUSG00000035561(Aldh1b1)	ENSMUSG00000006442(Srm)	http://www.kegg.jp/kegg-bin/show_pathway?map00330/K00797%09%23FFFFFF,green/K00128%09%23FFFFFF,red/
mmu05418	Fluid shear stress and atherosclerosis	Human Diseases	Cardiovascular diseases	4	0	4	142	0.273352	0.612244	ENSMUSG00000021367(Edn1),ENSMUSG00000020717(Pecam1),ENSMUSG00000035352(Ccl12),ENSMUSG00000062960(Kdr)	-	http://www.kegg.jp/kegg-bin/show_pathway?map05418/K06471%09%23FFFFFF,red/K05098%09%23FFFFFF,red/K14624%09%23FFFFFF,red/K16366%09%23FFFFFF,red/
mmu04923	Regulation of lipolysis in adipocytes	Organismal Systems	Endocrine system	2	0	2	55	0.273744	0.612244	ENSMUSG00000030671(Pde3b),ENSMUSG00000060675(Plaat3)	-	http://www.kegg.jp/kegg-bin/show_pathway?map04923/K13296%09%23FFFFFF,red/K16817%09%23FFFFFF,red/
mmu04330	Notch signaling pathway	Environmental Information Processing	Signal transduction	1	1	2	55	0.273744	0.612244	ENSMUSG00000014773(Dll1)	ENSMUSG00000034758(Tle6)	http://www.kegg.jp/kegg-bin/show_pathway?map04330/K04497%09%23FFFFFF,green/K06051%09%23FFFFFF,red/
mmu04922	Glucagon signaling pathway	Organismal Systems	Endocrine system	2	1	3	99	0.281202	0.615684	ENSMUSG00000030671(Pde3b),ENSMUSG00000053007(Creb5)	ENSMUSG00000078937(Cpt1b)	http://www.kegg.jp/kegg-bin/show_pathway?map04922/K09047%09%23FFFFFF,red/K19523%09%23FFFFFF,green/K13296%09%23FFFFFF,red/
mmu04066	HIF-1 signaling pathway	Environmental Information Processing	Signal transduction	3	0	3	99	0.281202	0.615684	ENSMUSG00000021367(Edn1),ENSMUSG00000026773(Pfkfb3),ENSMUSG00000004040(Stat3)	-	http://www.kegg.jp/kegg-bin/show_pathway?map04066/K04692%09%23FFFFFF,red/K01103%09%23FFFFFF,red/K16366%09%23FFFFFF,red/
mmu04370	VEGF signaling pathway	Environmental Information Processing	Signal transduction	2	0	2	58	0.294526	0.63156	ENSMUSG00000062960(Kdr),ENSMUSG00000033847(Pla2g4c)	-	http://www.kegg.jp/kegg-bin/show_pathway?map04370/K16342%09%23FFFFFF,red/K05098%09%23FFFFFF,red/
mmu00310	Lysine degradation	Metabolism	Amino acid metabolism	2	0	2	58	0.294526	0.63156	ENSMUSG00000071350(Setdb2),ENSMUSG00000035561(Aldh1b1)	-	http://www.kegg.jp/kegg-bin/show_pathway?map00310/K00128%09%23FFFFFF,red/K18494%09%23FFFFFF,red/
mmu04010	MAPK signaling pathway	Environmental Information Processing	Signal transduction	6	1	7	293	0.306634	0.650816	ENSMUSG00000002307(Daxx),ENSMUSG00000034765(Dusp5),ENSMUSG00000031628(Casp3),ENSMUSG00000062232(Rapgef2),ENSMUSG00000062960(Kdr),ENSMUSG00000033847(Pla2g4c)	ENSMUSG00000066839(Ecsit)	http://www.kegg.jp/kegg-bin/show_pathway?map04010/K08018%09%23FFFFFF,red/K16342%09%23FFFFFF,red/K02308%09%23FFFFFF,red/K02187%09%23FFFFFF,red/K04405%09%23FFFFFF,green/K05098%09%23FFFFFF,red/K04459%09%23FFFFFF,red/
mmu00561	Glycerolipid metabolism	Metabolism	Lipid metabolism	2	0	2	62	0.322094	0.676722	ENSMUSG00000053846(Lipg),ENSMUSG00000035561(Aldh1b1)	-	http://www.kegg.jp/kegg-bin/show_pathway?map00561/K00128%09%23FFFFFF,red/K22284%09%23FFFFFF,red/
mmu04724	Glutamatergic synapse	Organismal Systems	Nervous system	2	1	3	110	0.337337	0.691827	ENSMUSG00000033847(Pla2g4c),ENSMUSG00000027669(Gnb4)	ENSMUSG00000038607(Gng10)	http://www.kegg.jp/kegg-bin/show_pathway?map04724/K04538%09%23FFFFFF,red/K04545%09%23FFFFFF,green/K16342%09%23FFFFFF,red/
mmu03430	Mismatch repair	Genetic Information Processing	Replication and repair	0	1	1	22	0.339261	0.691827	-	ENSMUSG00000038644(Pold1)	http://www.kegg.jp/kegg-bin/show_pathway?map03430/K02327%09%23FFFFFF,green/
mmu04977	Vitamin digestion and absorption	Organismal Systems	Digestive system	0	1	1	22	0.339261	0.691827	-	ENSMUSG00000006641(Slc5a6)	http://www.kegg.jp/kegg-bin/show_pathway?map04977/K14386%09%23FFFFFF,green/
mmu04919	Thyroid hormone signaling pathway	Organismal Systems	Endocrine system	2	1	3	112	0.347552	0.69482	ENSMUSG00000056476(Med12l),ENSMUSG00000026104(Stat1)	ENSMUSG00000026409(Pfkfb2)	http://www.kegg.jp/kegg-bin/show_pathway?map04919/K15162%09%23FFFFFF,red/K11220%09%23FFFFFF,red/K19029%09%23FFFFFF,green/
mmu04725	Cholinergic synapse	Organismal Systems	Nervous system	2	1	3	112	0.347552	0.69482	ENSMUSG00000027669(Gnb4),ENSMUSG00000053007(Creb5)	ENSMUSG00000038607(Gng10)	http://www.kegg.jp/kegg-bin/show_pathway?map04725/K09047%09%23FFFFFF,red/K04545%09%23FFFFFF,green/K04538%09%23FFFFFF,red/
mmu04015	Rap1 signaling pathway	Environmental Information Processing	Signal transduction	4	1	5	209	0.350751	0.69482	ENSMUSG00000052087(Rgs14),ENSMUSG00000062232(Rapgef2),ENSMUSG00000062960(Kdr),ENSMUSG00000030786(Itgam)	ENSMUSG00000042745(Id1)	http://www.kegg.jp/kegg-bin/show_pathway?map04015/K04680%09%23FFFFFF,green/K17706%09%23FFFFFF,red/K08018%09%23FFFFFF,red/K06461%09%23FFFFFF,red/K05098%09%23FFFFFF,red/
mmu04670	Leukocyte transendothelial migration	Organismal Systems	Immune system	3	0	3	114	0.357751	0.702002	ENSMUSG00000029204(Rhoh),ENSMUSG00000030786(Itgam),ENSMUSG00000020717(Pecam1)	-	http://www.kegg.jp/kegg-bin/show_pathway?map04670/K07873%09%23FFFFFF,red/K06471%09%23FFFFFF,red/K06461%09%23FFFFFF,red/
mmu04920	Adipocytokine signaling pathway	Organismal Systems	Endocrine system	1	1	2	71	0.382962	0.744449	ENSMUSG00000004040(Stat3)	ENSMUSG00000078937(Cpt1b)	http://www.kegg.jp/kegg-bin/show_pathway?map04920/K04692%09%23FFFFFF,red/K19523%09%23FFFFFF,green/
mmu00790	Folate biosynthesis	Metabolism	Metabolism of cofactors and vitamins	0	1	1	26	0.387254	0.745823	-	ENSMUSG00000009566(Fpgs)	http://www.kegg.jp/kegg-bin/show_pathway?map00790/K01930%09%23FFFFFF,green/
mmu05212	Pancreatic cancer	Human Diseases	Cancers: Specific types	2	0	2	73	0.396187	0.753904	ENSMUSG00000004040(Stat3),ENSMUSG00000026104(Stat1)	-	http://www.kegg.jp/kegg-bin/show_pathway?map05212/K04692%09%23FFFFFF,red/K11220%09%23FFFFFF,red/
mmu00053	Ascorbate and aldarate metabolism	Metabolism	Carbohydrate metabolism	1	0	1	27	0.398699	0.753904	ENSMUSG00000035561(Aldh1b1)	-	http://www.kegg.jp/kegg-bin/show_pathway?map00053/K00128%09%23FFFFFF,red/
mmu01524	Platinum drug resistance	Human Diseases	Drug resistance: Antineoplastic	2	0	2	77	0.422234	0.786039	ENSMUSG00000031628(Casp3),ENSMUSG00000019979(Apaf1)	-	http://www.kegg.jp/kegg-bin/show_pathway?map01524/K02187%09%23FFFFFF,red/K02084%09%23FFFFFF,red/
mmu05012	Parkinson's disease	Human Diseases	Neurodegenerative diseases	3	0	3	127	0.423252	0.786039	ENSMUSG00000032596(Uba7),ENSMUSG00000031628(Casp3),ENSMUSG00000019979(Apaf1)	-	http://www.kegg.jp/kegg-bin/show_pathway?map05012/K02187%09%23FFFFFF,red/K10698%09%23FFFFFF,red/K02084%09%23FFFFFF,red/
mmu01523	Antifolate resistance	Human Diseases	Drug resistance: Antineoplastic	0	1	1	30	0.431772	0.787182	-	ENSMUSG00000009566(Fpgs)	http://www.kegg.jp/kegg-bin/show_pathway?map01523/K01930%09%23FFFFFF,green/
mmu01521	EGFR tyrosine kinase inhibitor resistance	Human Diseases	Drug resistance: Antineoplastic	2	0	2	79	0.435041	0.787182	ENSMUSG00000004040(Stat3),ENSMUSG00000062960(Kdr)	-	http://www.kegg.jp/kegg-bin/show_pathway?map01521/K04692%09%23FFFFFF,red/K05098%09%23FFFFFF,red/
mmu04666	Fc gamma R-mediated phagocytosis	Organismal Systems	Immune system	2	0	2	80	0.441387	0.787182	ENSMUSG00000015947(Fcgr1),ENSMUSG00000036995(Asap3)	-	http://www.kegg.jp/kegg-bin/show_pathway?map04666/K06498%09%23FFFFFF,red/K12488%09%23FFFFFF,red/
mmu04068	FoxO signaling pathway	Environmental Information Processing	Signal transduction	3	0	3	131	0.442981	0.787182	ENSMUSG00000004040(Stat3),ENSMUSG00000039304(Tnfsf10),ENSMUSG00000000184(Ccnd2)	-	http://www.kegg.jp/kegg-bin/show_pathway?map04068/K10151%09%23FFFFFF,red/K04721%09%23FFFFFF,red/K04692%09%23FFFFFF,red/
mmu05016	Huntington's disease	Human Diseases	Neurodegenerative diseases	4	0	4	183	0.445724	0.787182	ENSMUSG00000005237(Dnah2),ENSMUSG00000031628(Casp3),ENSMUSG00000019979(Apaf1),ENSMUSG00000053007(Creb5)	-	http://www.kegg.jp/kegg-bin/show_pathway?map05016/K02084%09%23FFFFFF,red/K09047%09%23FFFFFF,red/K10408%09%23FFFFFF,red/K02187%09%23FFFFFF,red/
mmu00062	Fatty acid elongation	Metabolism	Lipid metabolism	1	0	1	32	0.452807	0.787182	ENSMUSG00000021364(Elovl2)	-	http://www.kegg.jp/kegg-bin/show_pathway?map00062/K10205%09%23FFFFFF,red/
mmu04550	Signaling pathways regulating pluripotency of stem cells	Cellular Processes	Cellular community - eukaryotes	2	1	3	134	0.457605	0.787182	ENSMUSG00000004040(Stat3),ENSMUSG00000024805(Pcgf5)	ENSMUSG00000042745(Id1)	http://www.kegg.jp/kegg-bin/show_pathway?map04550/K04692%09%23FFFFFF,red/K11489%09%23FFFFFF,red/K04680%09%23FFFFFF,green/
mmu04371	Apelin signaling pathway	Environmental Information Processing	Signal transduction	2	1	3	135	0.462444	0.787182	ENSMUSG00000030671(Pde3b),ENSMUSG00000027669(Gnb4)	ENSMUSG00000038607(Gng10)	http://www.kegg.jp/kegg-bin/show_pathway?map04371/K04545%09%23FFFFFF,green/K13296%09%23FFFFFF,red/K04538%09%23FFFFFF,red/
mmu00760	Nicotinate and nicotinamide metabolism	Metabolism	Metabolism of cofactors and vitamins	0	1	1	33	0.463032	0.787182	-	ENSMUSG00000032456(Nmnat3)	http://www.kegg.jp/kegg-bin/show_pathway?map00760/K06210%09%23FFFFFF,green/
mmu04270	Vascular smooth muscle contraction	Organismal Systems	Circulatory system	2	1	3	137	0.472065	0.787182	ENSMUSG00000021367(Edn1),ENSMUSG00000033847(Pla2g4c)	ENSMUSG00000027999(Pla2g12a)	http://www.kegg.jp/kegg-bin/show_pathway?map04270/K16366%09%23FFFFFF,red/K16342%09%23FFFFFF,red/K01047%09%23FFFFFF,green/
mmu04727	GABAergic synapse	Organismal Systems	Nervous system	1	1	2	85	0.472514	0.787182	ENSMUSG00000027669(Gnb4)	ENSMUSG00000038607(Gng10)	http://www.kegg.jp/kegg-bin/show_pathway?map04727/K04538%09%23FFFFFF,red/K04545%09%23FFFFFF,green/
mmu01040	Biosynthesis of unsaturated fatty acids	Metabolism	Lipid metabolism	1	0	1	34	0.473066	0.787182	ENSMUSG00000021364(Elovl2)	-	http://www.kegg.jp/kegg-bin/show_pathway?map01040/K10205%09%23FFFFFF,red/
mmu05340	Primary immunodeficiency	Human Diseases	Immune diseases	1	0	1	34	0.473066	0.787182	ENSMUSG00000037321(Tap1)	-	http://www.kegg.jp/kegg-bin/show_pathway?map05340/K05653%09%23FFFFFF,red/
mmu04120	Ubiquitin mediated proteolysis	Genetic Information Processing	Folding, sorting and degradation	3	0	3	139	0.481608	0.795036	ENSMUSG00000032596(Uba7),ENSMUSG00000035299(Mid1),ENSMUSG00000036986(Pml)	-	http://www.kegg.jp/kegg-bin/show_pathway?map04120/K10698%09%23FFFFFF,red/K08285%09%23FFFFFF,red/K10054%09%23FFFFFF,red/
mmu04151	PI3K-Akt signaling pathway	Environmental Information Processing	Signal transduction	6	1	7	355	0.494249	0.809479	ENSMUSG00000027669(Gnb4),ENSMUSG00000026770(Il2ra),ENSMUSG00000000184(Ccnd2),ENSMUSG00000062960(Kdr),ENSMUSG00000053007(Creb5),ENSMUSG00000048806(Ifnb1)	ENSMUSG00000038607(Gng10)	http://www.kegg.jp/kegg-bin/show_pathway?map04151/K04538%09%23FFFFFF,red/K04545%09%23FFFFFF,green/K05415%09%23FFFFFF,red/K05068%09%23FFFFFF,red/K10151%09%23FFFFFF,red/K05098%09%23FFFFFF,red/K09047%09%23FFFFFF,red/
mmu04975	Fat digestion and absorption	Organismal Systems	Digestive system	0	1	1	37	0.502061	0.810358	-	ENSMUSG00000027999(Pla2g12a)	http://www.kegg.jp/kegg-bin/show_pathway?map04975/K01047%09%23FFFFFF,green/
mmu04914	Progesterone-mediated oocyte maturation	Organismal Systems	Endocrine system	1	1	2	90	0.502578	0.810358	ENSMUSG00000030671(Pde3b)	ENSMUSG00000027379(Bub1)	http://www.kegg.jp/kegg-bin/show_pathway?map04914/K13296%09%23FFFFFF,red/K02178%09%23FFFFFF,green/
mmu05222	Small cell lung cancer	Human Diseases	Cancers: Specific types	2	0	2	92	0.514291	0.822865	ENSMUSG00000031628(Casp3),ENSMUSG00000019979(Apaf1)	-	http://www.kegg.jp/kegg-bin/show_pathway?map05222/K02187%09%23FFFFFF,red/K02084%09%23FFFFFF,red/
mmu00260	Glycine, serine and threonine metabolism	Metabolism	Amino acid metabolism	0	1	1	40	0.529466	0.826647	-	ENSMUSG00000002769(Gnmt)	http://www.kegg.jp/kegg-bin/show_pathway?map00260/K00552%09%23FFFFFF,green/
mmu00620	Pyruvate metabolism	Metabolism	Carbohydrate metabolism	1	0	1	40	0.529466	0.826647	ENSMUSG00000035561(Aldh1b1)	-	http://www.kegg.jp/kegg-bin/show_pathway?map00620/K00128%09%23FFFFFF,red/
mmu04216	Ferroptosis	Cellular Processes	Cell growth and death	1	0	1	40	0.529466	0.826647	ENSMUSG00000003617(Cp)	-	http://www.kegg.jp/kegg-bin/show_pathway?map04216/K13624%09%23FFFFFF,red/
mmu04390	Hippo signaling pathway	Environmental Information Processing	Signal transduction	2	1	3	150	0.532551	0.826647	ENSMUSG00000061859(Patj),ENSMUSG00000000184(Ccnd2)	ENSMUSG00000042745(Id1)	http://www.kegg.jp/kegg-bin/show_pathway?map04390/K06092%09%23FFFFFF,red/K10151%09%23FFFFFF,red/K04680%09%23FFFFFF,green/
mmu00860	Porphyrin and chlorophyll metabolism	Metabolism	Metabolism of cofactors and vitamins	1	0	1	41	0.538263	0.829323	ENSMUSG00000003617(Cp)	-	http://www.kegg.jp/kegg-bin/show_pathway?map00860/K13624%09%23FFFFFF,red/
mmu04713	Circadian entrainment	Organismal Systems	Environmental adaptation	1	1	2	97	0.542768	0.830116	ENSMUSG00000027669(Gnb4)	ENSMUSG00000038607(Gng10)	http://www.kegg.jp/kegg-bin/show_pathway?map04713/K04545%09%23FFFFFF,green/K04538%09%23FFFFFF,red/
mmu05146	Amoebiasis	Human Diseases	Infectious diseases: Parasitic	2	0	2	99	0.55383	0.837076	ENSMUSG00000031628(Casp3),ENSMUSG00000030786(Itgam)	-	http://www.kegg.jp/kegg-bin/show_pathway?map05146/K06461%09%23FFFFFF,red/K02187%09%23FFFFFF,red/
mmu03022	Basal transcription factors	Genetic Information Processing	Transcription	0	1	1	43	0.555368	0.837076	-	ENSMUSG00000043866(Taf10)	http://www.kegg.jp/kegg-bin/show_pathway?map03022/K03134%09%23FFFFFF,green/
mmu04962	Vasopressin-regulated water reabsorption	Organismal Systems	Excretory system	1	0	1	44	0.563682	0.843495	ENSMUSG00000053007(Creb5)	-	http://www.kegg.jp/kegg-bin/show_pathway?map04962/K09047%09%23FFFFFF,red/
mmu05030	Cocaine addiction	Human Diseases	Substance dependence	1	0	1	47	0.587706	0.864971	ENSMUSG00000053007(Creb5)	-	http://www.kegg.jp/kegg-bin/show_pathway?map05030/K09047%09%23FFFFFF,red/
mmu04022	cGMP-PKG signaling pathway	Environmental Information Processing	Signal transduction	3	0	3	164	0.593119	0.864971	ENSMUSG00000030671(Pde3b),ENSMUSG00000053007(Creb5),ENSMUSG00000026360(Rgs2)	-	http://www.kegg.jp/kegg-bin/show_pathway?map04022/K09047%09%23FFFFFF,red/K13296%09%23FFFFFF,red/K18154%09%23FFFFFF,red/
mmu04928	Parathyroid hormone synthesis, secretion and action	Organismal Systems	Endocrine system	2	0	2	108	0.601249	0.864971	ENSMUSG00000023903(Mmp25),ENSMUSG00000053007(Creb5)	-	http://www.kegg.jp/kegg-bin/show_pathway?map04928/K08003%09%23FFFFFF,red/K09047%09%23FFFFFF,red/
mmu02010	ABC transporters	Environmental Information Processing	Membrane transport	1	0	1	49	0.602985	0.864971	ENSMUSG00000037321(Tap1)	-	http://www.kegg.jp/kegg-bin/show_pathway?map02010/K05653%09%23FFFFFF,red/
mmu04979	Cholesterol metabolism	Organismal Systems	Digestive system	1	0	1	49	0.602985	0.864971	ENSMUSG00000053846(Lipg)	-	http://www.kegg.jp/kegg-bin/show_pathway?map04979/K22284%09%23FFFFFF,red/
mmu04340	Hedgehog signaling pathway	Environmental Information Processing	Signal transduction	1	0	1	49	0.602985	0.864971	ENSMUSG00000000184(Ccnd2)	-	http://www.kegg.jp/kegg-bin/show_pathway?map04340/K10151%09%23FFFFFF,red/
mmu00270	Cysteine and methionine metabolism	Metabolism	Amino acid metabolism	0	1	1	50	0.610411	0.868118	-	ENSMUSG00000006442(Srm)	http://www.kegg.jp/kegg-bin/show_pathway?map00270/K00797%09%23FFFFFF,green/
mmu04625	C-type lectin receptor signaling pathway	Organismal Systems	Immune system	2	0	2	111	0.61619	0.868118	ENSMUSG00000030147(Clec4b1),ENSMUSG00000026104(Stat1)	-	http://www.kegg.jp/kegg-bin/show_pathway?map04625/K17514%09%23FFFFFF,red/K11220%09%23FFFFFF,red/
mmu03460	Fanconi anemia pathway	Genetic Information Processing	Replication and repair	1	0	1	51	0.617699	0.868118	ENSMUSG00000034329(Brip1)	-	http://www.kegg.jp/kegg-bin/show_pathway?map03460/K15362%09%23FFFFFF,red/
mmu04114	Oocyte meiosis	Cellular Processes	Cell growth and death	1	1	2	114	0.630699	0.874569	ENSMUSG00000020415(Pttg1)	ENSMUSG00000027379(Bub1)	http://www.kegg.jp/kegg-bin/show_pathway?map04114/K02178%09%23FFFFFF,green/K06635%09%23FFFFFF,red/
mmu04071	Sphingolipid signaling pathway	Environmental Information Processing	Signal transduction	2	0	2	114	0.630699	0.874569	ENSMUSG00000021263(Degs2),ENSMUSG00000024887(Asah2)	-	http://www.kegg.jp/kegg-bin/show_pathway?map04071/K12349%09%23FFFFFF,red/K04712%09%23FFFFFF,red/
mmu04360	Axon guidance	Organismal Systems	Development	2	1	3	175	0.63701	0.877471	ENSMUSG00000049939(Lrrc4),ENSMUSG00000026121(Sema4c)	ENSMUSG00000001227(Sema6b)	http://www.kegg.jp/kegg-bin/show_pathway?map04360/K06842%09%23FFFFFF,green/K06521%09%23FFFFFF,red/K16351%09%23FFFFFF,red/
mmu00280	Valine, leucine and isoleucine degradation	Metabolism	Amino acid metabolism	1	0	1	56	0.652151	0.892418	ENSMUSG00000035561(Aldh1b1)	-	http://www.kegg.jp/kegg-bin/show_pathway?map00280/K00128%09%23FFFFFF,red/
mmu04913	Ovarian steroidogenesis	Organismal Systems	Endocrine system	1	0	1	58	0.66505	0.90412	ENSMUSG00000033847(Pla2g4c)	-	http://www.kegg.jp/kegg-bin/show_pathway?map04913/K16342%09%23FFFFFF,red/
mmu04750	Inflammatory mediator regulation of TRP channels	Organismal Systems	Sensory system	2	0	2	124	0.67598	0.909122	ENSMUSG00000034997(Htr2a),ENSMUSG00000033847(Pla2g4c)	-	http://www.kegg.jp/kegg-bin/show_pathway?map04750/K04157%09%23FFFFFF,red/K16342%09%23FFFFFF,red/
mmu04730	Long-term depression	Organismal Systems	Nervous system	1	0	1	60	0.677471	0.909122	ENSMUSG00000033847(Pla2g4c)	-	http://www.kegg.jp/kegg-bin/show_pathway?map04730/K16342%09%23FFFFFF,red/
mmu05205	Proteoglycans in cancer	Human Diseases	Cancers: Overview	3	0	3	195	0.708078	0.923664	ENSMUSG00000062960(Kdr),ENSMUSG00000031628(Casp3),ENSMUSG00000004040(Stat3)	-	http://www.kegg.jp/kegg-bin/show_pathway?map05205/K05098%09%23FFFFFF,red/K02187%09%23FFFFFF,red/K04692%09%23FFFFFF,red/
mmu05223	Non-small cell lung cancer	Human Diseases	Cancers: Specific types	1	0	1	66	0.712048	0.923664	ENSMUSG00000004040(Stat3)	-	http://www.kegg.jp/kegg-bin/show_pathway?map05223/K04692%09%23FFFFFF,red/
mmu05031	Amphetamine addiction	Human Diseases	Substance dependence	1	0	1	66	0.712048	0.923664	ENSMUSG00000053007(Creb5)	-	http://www.kegg.jp/kegg-bin/show_pathway?map05031/K09047%09%23FFFFFF,red/
mmu00480	Glutathione metabolism	Metabolism	Metabolism of other amino acids	0	1	1	66	0.712048	0.923664	-	ENSMUSG00000006442(Srm)	http://www.kegg.jp/kegg-bin/show_pathway?map00480/K00797%09%23FFFFFF,green/
mmu04664	Fc epsilon RI signaling pathway	Organismal Systems	Immune system	1	0	1	66	0.712048	0.923664	ENSMUSG00000033847(Pla2g4c)	-	http://www.kegg.jp/kegg-bin/show_pathway?map04664/K16342%09%23FFFFFF,red/
mmu00010	Glycolysis / Gluconeogenesis	Metabolism	Carbohydrate metabolism	1	0	1	67	0.71744	0.923664	ENSMUSG00000035561(Aldh1b1)	-	http://www.kegg.jp/kegg-bin/show_pathway?map00010/K00128%09%23FFFFFF,red/
mmu04520	Adherens junction	Cellular Processes	Cellular community - eukaryotes	1	0	1	68	0.722731	0.923664	ENSMUSG00000006411(Nectin4)	-	http://www.kegg.jp/kegg-bin/show_pathway?map04520/K06593%09%23FFFFFF,red/
mmu05412	Arrhythmogenic right ventricular cardiomyopathy (ARVC)	Human Diseases	Cardiovascular diseases	1	0	1	69	0.727924	0.923664	ENSMUSG00000001552(Jup)	-	http://www.kegg.jp/kegg-bin/show_pathway?map05412/K10056%09%23FFFFFF,red/
mmu04723	Retrograde endocannabinoid signaling	Organismal Systems	Nervous system	1	1	2	139	0.735336	0.923664	ENSMUSG00000027669(Gnb4)	ENSMUSG00000038607(Gng10)	http://www.kegg.jp/kegg-bin/show_pathway?map04723/K04545%09%23FFFFFF,green/K04538%09%23FFFFFF,red/
mmu04927	Cortisol synthesis and secretion	Organismal Systems	Endocrine system	1	0	1	71	0.738021	0.923664	ENSMUSG00000053007(Creb5)	-	http://www.kegg.jp/kegg-bin/show_pathway?map04927/K09047%09%23FFFFFF,red/
mmu04924	Renin secretion	Organismal Systems	Endocrine system	1	0	1	71	0.738021	0.923664	ENSMUSG00000030671(Pde3b)	-	http://www.kegg.jp/kegg-bin/show_pathway?map04924/K13296%09%23FFFFFF,red/
mmu04918	Thyroid hormone synthesis	Organismal Systems	Endocrine system	1	0	1	72	0.742929	0.923664	ENSMUSG00000053007(Creb5)	-	http://www.kegg.jp/kegg-bin/show_pathway?map04918/K09047%09%23FFFFFF,red/
mmu04261	Adrenergic signaling in cardiomyocytes	Organismal Systems	Circulatory system	2	0	2	142	0.746036	0.923664	ENSMUSG00000053007(Creb5),ENSMUSG00000063889(Crem)	-	http://www.kegg.jp/kegg-bin/show_pathway?map04261/K09047%09%23FFFFFF,red/K09052%09%23FFFFFF,red/
mmu04932	Non-alcoholic fatty liver disease (NAFLD)	Human Diseases	Endocrine and metabolic diseases	1	1	2	144	0.752962	0.926723	ENSMUSG00000031628(Casp3)	ENSMUSG00000034957(Cebpa)	http://www.kegg.jp/kegg-bin/show_pathway?map04932/K09055%09%23FFFFFF,green/K02187%09%23FFFFFF,red/
mmu03008	Ribosome biogenesis in eukaryotes	Genetic Information Processing	Translation	0	1	1	78	0.770508	0.928762	-	ENSMUSG00000060152(Pop5)	http://www.kegg.jp/kegg-bin/show_pathway?map03008/K03537%09%23FFFFFF,green/
mmu04921	Oxytocin signaling pathway	Organismal Systems	Endocrine system	2	0	2	151	0.775937	0.928762	ENSMUSG00000026360(Rgs2),ENSMUSG00000033847(Pla2g4c)	-	http://www.kegg.jp/kegg-bin/show_pathway?map04921/K16342%09%23FFFFFF,red/K18154%09%23FFFFFF,red/
mmu05410	Hypertrophic cardiomyopathy (HCM)	Human Diseases	Cardiovascular diseases	1	0	1	81	0.783171	0.928762	ENSMUSG00000021367(Edn1)	-	http://www.kegg.jp/kegg-bin/show_pathway?map05410/K16366%09%23FFFFFF,red/
mmu03018	RNA degradation	Genetic Information Processing	Folding, sorting and degradation	1	0	1	82	0.787235	0.928762	ENSMUSG00000020464(Pnpt1)	-	http://www.kegg.jp/kegg-bin/show_pathway?map03018/K00962%09%23FFFFFF,red/
mmu04310	Wnt signaling pathway	Environmental Information Processing	Signal transduction	1	1	2	155	0.788213	0.928762	ENSMUSG00000000184(Ccnd2)	ENSMUSG00000034758(Tle6)	http://www.kegg.jp/kegg-bin/show_pathway?map04310/K10151%09%23FFFFFF,red/K04497%09%23FFFFFF,green/
mmu04530	Tight junction	Cellular Processes	Cellular community - eukaryotes	2	0	2	156	0.791188	0.928762	ENSMUSG00000062232(Rapgef2),ENSMUSG00000061859(Patj)	-	http://www.kegg.jp/kegg-bin/show_pathway?map04530/K06092%09%23FFFFFF,red/K08018%09%23FFFFFF,red/
mmu04911	Insulin secretion	Organismal Systems	Endocrine system	1	0	1	85	0.798979	0.928762	ENSMUSG00000053007(Creb5)	-	http://www.kegg.jp/kegg-bin/show_pathway?map04911/K09047%09%23FFFFFF,red/
mmu03320	PPAR signaling pathway	Organismal Systems	Endocrine system	0	1	1	85	0.798979	0.928762	-	ENSMUSG00000078937(Cpt1b)	http://www.kegg.jp/kegg-bin/show_pathway?map03320/K19523%09%23FFFFFF,green/
mmu04540	Gap junction	Cellular Processes	Cellular community - eukaryotes	1	0	1	86	0.802748	0.928762	ENSMUSG00000034997(Htr2a)	-	http://www.kegg.jp/kegg-bin/show_pathway?map04540/K04157%09%23FFFFFF,red/
mmu05210	Colorectal cancer	Human Diseases	Cancers: Specific types	1	0	1	87	0.806446	0.928762	ENSMUSG00000031628(Casp3)	-	http://www.kegg.jp/kegg-bin/show_pathway?map05210/K02187%09%23FFFFFF,red/
mmu00983	Drug metabolism - other enzymes	Metabolism	Xenobiotics biodegradation and metabolism	0	1	1	88	0.810076	0.928762	-	ENSMUSG00000026575(Nme7)	http://www.kegg.jp/kegg-bin/show_pathway?map00983/K00940%09%23FFFFFF,green/
mmu05010	Alzheimer's disease	Human Diseases	Neurodegenerative diseases	2	0	2	165	0.816347	0.928762	ENSMUSG00000031628(Casp3),ENSMUSG00000019979(Apaf1)	-	http://www.kegg.jp/kegg-bin/show_pathway?map05010/K02084%09%23FFFFFF,red/K02187%09%23FFFFFF,red/
mmu04912	GnRH signaling pathway	Organismal Systems	Endocrine system	1	0	1	90	0.817132	0.928762	ENSMUSG00000033847(Pla2g4c)	-	http://www.kegg.jp/kegg-bin/show_pathway?map04912/K16342%09%23FFFFFF,red/
mmu04211	Longevity regulating pathway	Organismal Systems	Aging	1	0	1	90	0.817132	0.928762	ENSMUSG00000053007(Creb5)	-	http://www.kegg.jp/kegg-bin/show_pathway?map04211/K09047%09%23FFFFFF,red/
mmu04064	NF-kappa B signaling pathway	Environmental Information Processing	Signal transduction	1	0	1	92	0.823928	0.929898	ENSMUSG00000040296(Ddx58)	-	http://www.kegg.jp/kegg-bin/show_pathway?map04064/K12646%09%23FFFFFF,red/
mmu01522	Endocrine resistance	Human Diseases	Drug resistance: Antineoplastic	1	0	1	93	0.82723	0.929898	ENSMUSG00000014773(Dll1)	-	http://www.kegg.jp/kegg-bin/show_pathway?map01522/K06051%09%23FFFFFF,red/
mmu05215	Prostate cancer	Human Diseases	Cancers: Specific types	1	0	1	95	0.833652	0.929898	ENSMUSG00000053007(Creb5)	-	http://www.kegg.jp/kegg-bin/show_pathway?map05215/K09047%09%23FFFFFF,red/
mmu05231	Choline metabolism in cancer	Human Diseases	Cancers: Overview	1	0	1	98	0.84284	0.929898	ENSMUSG00000033847(Pla2g4c)	-	http://www.kegg.jp/kegg-bin/show_pathway?map05231/K16342%09%23FFFFFF,red/
mmu04925	Aldosterone synthesis and secretion	Organismal Systems	Endocrine system	1	0	1	100	0.848683	0.929898	ENSMUSG00000053007(Creb5)	-	http://www.kegg.jp/kegg-bin/show_pathway?map04925/K09047%09%23FFFFFF,red/
mmu04916	Melanogenesis	Organismal Systems	Endocrine system	1	0	1	100	0.848683	0.929898	ENSMUSG00000021367(Edn1)	-	http://www.kegg.jp/kegg-bin/show_pathway?map04916/K16366%09%23FFFFFF,red/
mmu04080	Neuroactive ligand-receptor interaction	Environmental Information Processing	Signaling molecules and interaction	4	0	4	319	0.849426	0.929898	ENSMUSG00000034997(Htr2a),ENSMUSG00000033470(Cysltr2),ENSMUSG00000036362(P2ry13),ENSMUSG00000036381(P2ry14)	-	http://www.kegg.jp/kegg-bin/show_pathway?map04080/K08388%09%23FFFFFF,red/K04157%09%23FFFFFF,red/K04323%09%23FFFFFF,red/K04299%09%23FFFFFF,red/
mmu04020	Calcium signaling pathway	Environmental Information Processing	Signal transduction	2	0	2	185	0.862797	0.937024	ENSMUSG00000034997(Htr2a),ENSMUSG00000033470(Cysltr2)	-	http://www.kegg.jp/kegg-bin/show_pathway?map04020/K04157%09%23FFFFFF,red/K04323%09%23FFFFFF,red/
mmu04972	Pancreatic secretion	Organismal Systems	Digestive system	0	1	1	106	0.864945	0.937024	-	ENSMUSG00000027999(Pla2g12a)	http://www.kegg.jp/kegg-bin/show_pathway?map04972/K01047%09%23FFFFFF,green/
mmu04024	cAMP signaling pathway	Environmental Information Processing	Signal transduction	2	0	2	196	0.883513	0.94913	ENSMUSG00000053007(Creb5),ENSMUSG00000030671(Pde3b)	-	http://www.kegg.jp/kegg-bin/show_pathway?map04024/K09047%09%23FFFFFF,red/K13296%09%23FFFFFF,red/
mmu04510	Focal adhesion	Cellular Processes	Cellular community - eukaryotes	2	0	2	197	0.885246	0.94913	ENSMUSG00000000184(Ccnd2),ENSMUSG00000062960(Kdr)	-	http://www.kegg.jp/kegg-bin/show_pathway?map04510/K05098%09%23FFFFFF,red/K10151%09%23FFFFFF,red/
mmu04611	Platelet activation	Organismal Systems	Immune system	1	0	1	122	0.900288	0.955408	ENSMUSG00000033847(Pla2g4c)	-	http://www.kegg.jp/kegg-bin/show_pathway?map04611/K16342%09%23FFFFFF,red/
mmu04142	Lysosome	Cellular Processes	Transport and catabolism	1	0	1	122	0.900288	0.955408	ENSMUSG00000030560(Ctsc)	-	http://www.kegg.jp/kegg-bin/show_pathway?map04142/K01275%09%23FFFFFF,red/
mmu04714	Thermogenesis	Organismal Systems	Environmental adaptation	1	1	2	212	0.908533	0.959263	ENSMUSG00000053007(Creb5)	ENSMUSG00000078937(Cpt1b)	http://www.kegg.jp/kegg-bin/show_pathway?map04714/K09047%09%23FFFFFF,red/K19523%09%23FFFFFF,green/
mmu03040	Spliceosome	Genetic Information Processing	Transcription	1	0	1	130	0.914333	0.960511	ENSMUSG00000063800(Prpf38a)	-	http://www.kegg.jp/kegg-bin/show_pathway?map03040/K12849%09%23FFFFFF,red/
mmu04915	Estrogen signaling pathway	Organismal Systems	Endocrine system	1	0	1	133	0.919075	0.960641	ENSMUSG00000053007(Creb5)	-	http://www.kegg.jp/kegg-bin/show_pathway?map04915/K09047%09%23FFFFFF,red/
mmu04910	Insulin signaling pathway	Organismal Systems	Endocrine system	1	0	1	137	0.924994	0.961074	ENSMUSG00000030671(Pde3b)	-	http://www.kegg.jp/kegg-bin/show_pathway?map04910/K13296%09%23FFFFFF,red/
mmu04072	Phospholipase D signaling pathway	Environmental Information Processing	Signal transduction	1	0	1	143	0.933073	0.961074	ENSMUSG00000033847(Pla2g4c)	-	http://www.kegg.jp/kegg-bin/show_pathway?map04072/K16342%09%23FFFFFF,red/
mmu05226	Gastric cancer	Human Diseases	Cancers: Specific types	1	0	1	147	0.937971	0.961074	ENSMUSG00000001552(Jup)	-	http://www.kegg.jp/kegg-bin/show_pathway?map05226/K10056%09%23FFFFFF,red/
mmu05224	Breast cancer	Human Diseases	Cancers: Specific types	1	0	1	147	0.937971	0.961074	ENSMUSG00000014773(Dll1)	-	http://www.kegg.jp/kegg-bin/show_pathway?map05224/K06051%09%23FFFFFF,red/
mmu04934	Cushing's syndrome	Human Diseases	Endocrine and metabolic diseases	1	0	1	161	0.952466	0.966891	ENSMUSG00000053007(Creb5)	-	http://www.kegg.jp/kegg-bin/show_pathway?map04934/K09047%09%23FFFFFF,red/
mmu04141	Protein processing in endoplasmic reticulum	Genetic Information Processing	Folding, sorting and degradation	1	0	1	164	0.955103	0.966891	ENSMUSG00000024079(Eif2ak2)	-	http://www.kegg.jp/kegg-bin/show_pathway?map04141/K16195%09%23FFFFFF,red/
mmu03013	RNA transport	Genetic Information Processing	Translation	0	1	1	167	0.957594	0.966891	-	ENSMUSG00000060152(Pop5)	http://www.kegg.jp/kegg-bin/show_pathway?map03013/K03537%09%23FFFFFF,green/
mmu04810	Regulation of actin cytoskeleton	Cellular Processes	Cell motility	1	0	1	210	0.981311	0.986051	ENSMUSG00000030786(Itgam)	-	http://www.kegg.jp/kegg-bin/show_pathway?map04810/K06461%09%23FFFFFF,red/
mmu04740	Olfactory transduction	Organismal Systems	Sensory system	2	0	2	1142	1	1	ENSMUSG00000026360(Rgs2),ENSMUSG00000040328(Olfr56)	-	http://www.kegg.jp/kegg-bin/show_pathway?map04740/K18154%09%23FFFFFF,red/K04257%09%23FFFFFF,red/
