# Supplementary material for: Transcriptomics and quantitative proteomics reveal changes after second stimulation of bone marrow-derived macrophages from lupus-prone MRL/lpr mice
Source: Front Immunol. 2022 Oct 19;13:1004232. doi: 10.3389/fimmu.2022.1004232 (PMC9627492; doi:10.3389/fimmu.2022.1004232)
Supplement: Supplementary file 12 [file Table_12.xlsx]

## Sheet: B_vs_A
Accession	Protein Name	Gene Name	Description	Coverage	Unique Peptides	Peptides	PSMs	AAs	MW [kDa]	calc. pI	B	A	B/A	Significance A
ENSMUSP00000152127	RAS and EF hand domain containing	Rasef	pep chromosome:GRCm39:4:73635905:73709231:-1 gene:ENSMUSG00000043003.15 transcript:ENSMUST00000222414.2 gene_biotype:protein_coding transcript_biotype:protein_coding gene_symbol:Rasef description:RAS and EF hand domain containing [Source:MGI Symbol;Acc:MGI:2448565]	2	1	1	1	708	79.5	5.02	5.26128	0.210479	24.9967	1.9818e-93
ENSMUSP00000007318	keratin 31	Krt31	pep chromosome:GRCm39:11:99937472:99941377:-1 gene:ENSMUSG00000048981.2 transcript:ENSMUST00000007318.2 gene_biotype:protein_coding transcript_biotype:protein_coding gene_symbol:Krt31 description:keratin 31 [Source:MGI Symbol;Acc:MGI:1309993]	20	2	9	15	416	47.1	4.89	4.86825	0.236416	20.5919	1.02309e-82
ENSMUSP00000099416	keratin 35	Krt35	pep chromosome:GRCm39:11:99983019:99987051:-1 gene:ENSMUSG00000048013.10 transcript:ENSMUST00000103127.4 gene_biotype:protein_coding transcript_biotype:protein_coding gene_symbol:Krt35 description:keratin 35 [Source:MGI Symbol;Acc:MGI:1858899]	9	1	5	13	455	50.5	4.97	4.36329	0.27739	15.7298	6.2236e-69
ENSMUSP00000018399	keratin 33A	Krt33a	pep chromosome:GRCm39:11:99902021:99907038:-1 gene:ENSMUSG00000035592.3 transcript:ENSMUST00000018399.3 gene_biotype:protein_coding transcript_biotype:protein_coding gene_symbol:Krt33a description:keratin 33A [Source:MGI Symbol;Acc:MGI:1919138]	16	1	7	10	404	46.1	4.83	4.15155	0.389296	10.6642	2.68766e-51
ENSMUSP00000155398	predicted gene, 49425	Gm49425	pep chromosome:GRCm39:15:101413801:101422054:-1 gene:ENSMUSG00000116336.3 transcript:ENSMUST00000230067.3 gene_biotype:protein_coding transcript_biotype:protein_coding gene_symbol:Gm49425 description:predicted gene, 49425 [Source:MGI Symbol;Acc:MGI:6155060]	20	4	12	34	507	55.7	6.42	4.30727	0.443855	9.70423	2.03351e-47
ENSMUSP00000056525	keratin 81	Krt81	pep chromosome:GRCm39:15:101356942:101361632:-1 gene:ENSMUSG00000067615.5 transcript:ENSMUST00000061185.8 gene_biotype:protein_coding transcript_biotype:protein_coding gene_symbol:Krt81 description:keratin 81 [Source:MGI Symbol;Acc:MGI:1928858]	21	2	11	31	481	52.8	5.76	3.32618	0.465358	7.14758	6.37742e-36
ENSMUSP00000039600	chemokine (C-C motif) ligand 5	Ccl5	pep chromosome:GRCm39:11:83416604:83421344:-1 gene:ENSMUSG00000035042.3 transcript:ENSMUST00000035938.3 gene_biotype:protein_coding transcript_biotype:protein_coding gene_symbol:Ccl5 description:chemokine (C-C motif) ligand 5 [Source:MGI Symbol;Acc:MGI:98262]	30	3	3	6	91	10.1	8.6	0.982289	0.181584	5.40955	7.03866e-27
ENSMUSP00000023713	keratin 82	Krt82	pep chromosome:GRCm39:15:101449649:101459102:-1 gene:ENSMUSG00000049548.10 transcript:ENSMUST00000023713.10 gene_biotype:protein_coding transcript_biotype:protein_coding gene_symbol:Krt82 description:keratin 82 [Source:MGI Symbol;Acc:MGI:2149248]	4	1	2	2	516	57.1	6.25	2.8188	0.57644	4.89002	6.14111e-24
ENSMUSP00000001008	chemokine (C-C motif) ligand 3	Ccl3	pep chromosome:GRCm39:11:83538670:83540181:-1 gene:ENSMUSG00000000982.6 transcript:ENSMUST00000001008.6 gene_biotype:protein_coding transcript_biotype:protein_coding gene_symbol:Ccl3 description:chemokine (C-C motif) ligand 3 [Source:MGI Symbol;Acc:MGI:98260]	8	1	1	1	92	10.3	6.42	1.00762	0.224863	4.48104	1.54133e-21
ENSMUSP00000020801	smg-8 homolog, nonsense mediated mRNA decay factor (C. elegans)	Smg8	pep chromosome:GRCm39:11:86968558:86977600:-1 gene:ENSMUSG00000020495.14 transcript:ENSMUST00000020801.14 gene_biotype:protein_coding transcript_biotype:protein_coding gene_symbol:Smg8 description:smg-8 homolog, nonsense mediated mRNA decay factor (C. elegans) [Source:MGI Symbol;Acc:MGI:1921383]	3	2	2	2	991	109.6	7.77	0.797407	0.188242	4.23608	4.58906e-20
ENSMUSP00000001611	nucleolar protein with MIF4G domain 1	Nom1	pep chromosome:GRCm39:5:29639662:29662841:1 gene:ENSMUSG00000001569.11 transcript:ENSMUST00000001611.11 gene_biotype:protein_coding transcript_biotype:protein_coding gene_symbol:Nom1 description:nucleolar protein with MIF4G domain 1 [Source:MGI Symbol;Acc:MGI:1861749]	1	1	1	1	854	95.9	8.87	1.78629	0.424235	4.21063	6.55335e-20
ENSMUSP00000025263	tumor necrosis factor	Tnf	pep chromosome:GRCm39:17:35418357:35420983:-1 gene:ENSMUSG00000024401.15 transcript:ENSMUST00000025263.15 gene_biotype:protein_coding transcript_biotype:protein_coding gene_symbol:Tnf description:tumor necrosis factor [Source:MGI Symbol;Acc:MGI:104798]	20	4	4	7	235	25.9	5.11	1.35633	0.346659	3.91257	4.46938e-18
ENSMUSP00000045527	cyclin-dependent kinase 10	Cdk10	pep chromosome:GRCm39:8:123951581:123958989:1 gene:ENSMUSG00000033862.8 transcript:ENSMUST00000036880.8 gene_biotype:protein_coding transcript_biotype:protein_coding gene_symbol:Cdk10 description:cyclin-dependent kinase 10 [Source:MGI Symbol;Acc:MGI:2448549]	2	1	1	1	360	40.9	8.91	1.63805	0.454613	3.60317	3.94268e-16
ENSMUSP00000125647	ataxin 2	Atxn2	pep chromosome:GRCm39:5:121915992:121933074:1 gene:ENSMUSG00000042605.17 transcript:ENSMUST00000160821.6 gene_biotype:protein_coding transcript_biotype:protein_coding gene_symbol:Atxn2 description:ataxin 2 [Source:MGI Symbol;Acc:MGI:1277223]	2	1	1	4	330	35.5	9.98	1.33408	0.386073	3.4555	3.45684e-15
ENSMUSP00000017384	cancer susceptibility candidate 3	Casc3	pep chromosome:GRCm39:11:98695731:98724640:1 gene:ENSMUSG00000078676.10 transcript:ENSMUST00000017384.14 gene_biotype:protein_coding transcript_biotype:protein_coding gene_symbol:Casc3 description:cancer susceptibility candidate 3 [Source:MGI Symbol;Acc:MGI:2179723]	2	1	1	1	698	75.7	6.44	1.46903	0.43009	3.41563	6.23358e-15
ENSMUSP00000047275	actin binding transcription modulator	Abitram	pep chromosome:GRCm39:4:56802349:56809601:1 gene:ENSMUSG00000038827.12 transcript:ENSMUST00000045368.12 gene_biotype:protein_coding transcript_biotype:protein_coding gene_symbol:Abitram description:actin binding transcription modulator [Source:MGI Symbol;Acc:MGI:2677850]	8	1	1	1	193	21.6	7.25	1.36017	0.419128	3.24524	7.87016e-14
ENSMUSP00000156132	topoisomerase (DNA) III beta	Top3b	pep chromosome:GRCm39:16:16688621:16710849:1 gene:ENSMUSG00000022779.17 transcript:ENSMUST00000232581.2 gene_biotype:protein_coding transcript_biotype:protein_coding gene_symbol:Top3b description:topoisomerase (DNA) III beta [Source:MGI Symbol;Acc:MGI:1333803]	4	3	3	3	862	96.9	7.93	1.72949	0.568027	3.04473	1.60173e-12
ENSMUSP00000053146	PHD finger protein 11A	Phf11a	pep chromosome:GRCm39:14:59514362:59534971:-1 gene:ENSMUSG00000044703.6 transcript:ENSMUST00000062307.5 gene_biotype:protein_coding transcript_biotype:protein_coding gene_symbol:Phf11a description:PHD finger protein 11A [Source:MGI Symbol;Acc:MGI:1918441]	5	2	2	2	293	32.7	5.11	0.781785	0.280506	2.78705	7.98203e-11
ENSMUSP00000053110	archaelysin family metallopeptidase 1	Amz1	pep chromosome:GRCm39:5:140709882:140739065:1 gene:ENSMUSG00000050022.17 transcript:ENSMUST00000060918.11 gene_biotype:protein_coding transcript_biotype:protein_coding gene_symbol:Amz1 description:archaelysin family metallopeptidase 1 [Source:MGI Symbol;Acc:MGI:2442258]	2	1	1	1	502	55.2	6.09	1.38531	0.498948	2.77647	9.37846e-11
ENSMUSP00000093816	interferon induced protein with tetratricopeptide repeats 1B like 2	Ifit1bl2	pep chromosome:GRCm39:19:34594449:34618143:-1 gene:ENSMUSG00000067297.6 transcript:ENSMUST00000087357.5 gene_biotype:protein_coding transcript_biotype:protein_coding gene_symbol:Ifit1bl2 description:interferon induced protein with tetratricopeptide repeats 1B like 2 [Source:MGI Symbol;Acc:MGI:2148249]	8	1	3	7	466	54	6.87	0.763815	0.280371	2.72431	2.07638e-10
ENSMUSP00000074885	chemokine (C-X-C motif) ligand 2	Cxcl2	pep chromosome:GRCm39:5:91051732:91053797:1 gene:ENSMUSG00000058427.11 transcript:ENSMUST00000075433.8 gene_biotype:protein_coding transcript_biotype:protein_coding gene_symbol:Cxcl2 description:chemokine (C-X-C motif) ligand 2 [Source:MGI Symbol;Acc:MGI:1340094]	12	1	1	3	100	10.6	9.14	1.34638	0.499383	2.69609	3.19238e-10
ENSMUSP00000112848	solute carrier family 7 (cationic amino acid transporter, y+ system), member 2	Slc7a2	pep chromosome:GRCm39:8:41351475:41370763:1 gene:ENSMUSG00000031596.16 transcript:ENSMUST00000118432.2 gene_biotype:protein_coding transcript_biotype:protein_coding gene_symbol:Slc7a2 description:solute carrier family 7 (cationic amino acid transporter, y+ system), member 2 [Source:MGI Symbol;Acc:MGI:99828]	9	6	6	6	674	73.6	7.42	1.12149	0.420712	2.66569	5.07549e-10
ENSMUSP00000094211	predicted gene 5169	Gm5169	pep chromosome:GRCm39:X:25232783:25256755:-1 gene:ENSMUSG00000096620.3 transcript:ENSMUST00000096469.7 gene_biotype:protein_coding transcript_biotype:protein_coding gene_symbol:Gm5169 description:predicted gene 5169 [Source:MGI Symbol;Acc:MGI:3804938]	15	1	1	1	212	24.6	4.42	0.773865	0.294753	2.62547	9.37497e-10
ENSMUSP00000052086	actin, beta-like 2	Actbl2	pep chromosome:GRCm39:13:111391547:111394283:1 gene:ENSMUSG00000055194.4 transcript:ENSMUST00000054716.4 gene_biotype:protein_coding transcript_biotype:protein_coding gene_symbol:Actbl2 description:actin, beta-like 2 [Source:MGI Symbol;Acc:MGI:2444552]	27	2	7	98	376	42	5.49	1.21535	0.467663	2.59876	1.40907e-09
ENSMUSP00000007799	caveolin 1, caveolae protein	Cav1	pep chromosome:GRCm39:6:17306334:17341323:1 gene:ENSMUSG00000007655.17 transcript:ENSMUST00000007799.13 gene_biotype:protein_coding transcript_biotype:protein_coding gene_symbol:Cav1 description:caveolin 1, caveolae protein [Source:MGI Symbol;Acc:MGI:102709]	5	1	1	1	178	20.5	6.02	1.01457	0.405448	2.50235	6.13206e-09
ENSMUSP00000031327	chemokine (C-X-C motif) ligand 1	Cxcl1	pep chromosome:GRCm39:5:91039100:91040974:1 gene:ENSMUSG00000029380.12 transcript:ENSMUST00000031327.9 gene_biotype:protein_coding transcript_biotype:protein_coding gene_symbol:Cxcl1 description:chemokine (C-X-C motif) ligand 1 [Source:MGI Symbol;Acc:MGI:108068]	46	3	3	3	96	10.2	9.19	1.26529	0.523352	2.41766	2.22719e-08
ENSMUSP00000116746	mitochondrial ribosomal protein L58	Mrpl58	pep chromosome:GRCm39:11:115294578:115303500:1 gene:ENSMUSG00000018858.16 transcript:ENSMUST00000153983.8 gene_biotype:protein_coding transcript_biotype:protein_coding gene_symbol:Mrpl58 description:mitochondrial ribosomal protein L58 [Source:MGI Symbol;Acc:MGI:1915822]	16	3	3	3	206	23.5	10.18	0.467097	0.197906	2.36019	5.3344e-08
ENSMUSP00000087587	guanylate binding protein 5	Gbp5	pep chromosome:GRCm39:3:142202661:142228105:1 gene:ENSMUSG00000105504.5 transcript:ENSMUST00000090127.7 gene_biotype:protein_coding transcript_biotype:protein_coding gene_symbol:Gbp5 description:guanylate binding protein 5 [Source:MGI Symbol;Acc:MGI:2429943]	10	6	6	8	590	66.9	6.09	0.932674	0.39555	2.35792	5.52168e-08
ENSMUSP00000062983	golgi autoantigen, golgin subfamily a, 7	Golga7	pep chromosome:GRCm39:8:23731362:23747090:-1 gene:ENSMUSG00000015341.18 transcript:ENSMUST00000051094.9 gene_biotype:protein_coding transcript_biotype:protein_coding gene_symbol:Golga7 description:golgi autoantigen, golgin subfamily a, 7 [Source:MGI Symbol;Acc:MGI:1931029]	30	4	4	4	137	15.8	7.05	1.26569	0.546638	2.3154	1.05212e-07
ENSMUSP00000091608	transmembrane protein 256	Tmem256	pep chromosome:GRCm39:11:69729350:69730444:1 gene:ENSMUSG00000070394.11 transcript:ENSMUST00000094065.5 gene_biotype:protein_coding transcript_biotype:protein_coding gene_symbol:Tmem256 description:transmembrane protein 256 [Source:MGI Symbol;Acc:MGI:1916436]	25	1	1	1	113	11.6	8.94	1.4943	0.647286	2.30856	1.16693e-07
ENSMUSP00000055637	MARCKS-like 1	Marcksl1	pep chromosome:GRCm39:4:129407374:129409778:1 gene:ENSMUSG00000047945.7 transcript:ENSMUST00000062356.7 gene_biotype:protein_coding transcript_biotype:protein_coding gene_symbol:Marcksl1 description:MARCKS-like 1 [Source:MGI Symbol;Acc:MGI:97143]	22	4	4	9	200	20.2	4.61	0.874247	0.38565	2.26695	2.18949e-07
ENSMUSP00000020653	secretion associated Ras related GTPase 1B	Sar1b	pep chromosome:GRCm39:11:51654514:51682752:1 gene:ENSMUSG00000020386.6 transcript:ENSMUST00000020653.6 gene_biotype:protein_coding transcript_biotype:protein_coding gene_symbol:Sar1b description:secretion associated Ras related GTPase 1B [Source:MGI Symbol;Acc:MGI:1913647]	21	2	3	6	198	22.4	6.11	1.49252	0.661218	2.25723	2.53547e-07
ENSMUSP00000149463	SUMO/sentrin specific peptidase 8	Senp8	pep chromosome:GRCm39:9:59643753:59657910:-1 gene:ENSMUSG00000051705.14 transcript:ENSMUST00000216329.2 gene_biotype:protein_coding transcript_biotype:protein_coding gene_symbol:Senp8 description:SUMO/sentrin specific peptidase 8 [Source:MGI Symbol;Acc:MGI:1918849]	3	1	1	1	234	26.6	6.15	1.70897	0.760727	2.2465	2.98074e-07
ENSMUSP00000028882	interleukin 1 alpha	Il1a	pep chromosome:GRCm39:2:129141530:129151892:-1 gene:ENSMUSG00000027399.2 transcript:ENSMUST00000028882.2 gene_biotype:protein_coding transcript_biotype:protein_coding gene_symbol:Il1a description:interleukin 1 alpha [Source:MGI Symbol;Acc:MGI:96542]	14	3	3	3	270	31	5.3	0.848728	0.379709	2.23521	3.53394e-07
ENSMUSP00000105415	tumor necrosis factor, alpha-induced protein 2	Tnfaip2	pep chromosome:GRCm39:12:111409092:111421112:1 gene:ENSMUSG00000021281.16 transcript:ENSMUST00000109792.8 gene_biotype:protein_coding transcript_biotype:protein_coding gene_symbol:Tnfaip2 description:tumor necrosis factor, alpha-induced protein 2 [Source:MGI Symbol;Acc:MGI:104960]	30	18	18	25	708	79.9	6.24	1.15556	0.523036	2.20934	5.21606e-07
ENSMUSP00000047202	protein phosphatase 1, regulatory inhibitor subunit 11	Ppp1r11	pep chromosome:GRCm39:17:37259248:37262605:-1 gene:ENSMUSG00000036398.14 transcript:ENSMUST00000040402.14 gene_biotype:protein_coding transcript_biotype:protein_coding gene_symbol:Ppp1r11 description:protein phosphatase 1, regulatory inhibitor subunit 11 [Source:MGI Symbol;Acc:MGI:1923747]	11	1	1	1	131	14.5	6.38	1.31805	0.59821	2.20332	5.71049e-07
ENSMUSP00000022722	aconitate decarboxylase 1	Acod1	pep chromosome:GRCm39:14:103284413:103294009:1 gene:ENSMUSG00000022126.7 transcript:ENSMUST00000022722.7 gene_biotype:protein_coding transcript_biotype:protein_coding gene_symbol:Acod1 description:aconitate decarboxylase 1 [Source:MGI Symbol;Acc:MGI:103206]	31	14	14	44	488	53.7	7.55	1.03198	0.473888	2.17769	8.38945e-07
ENSMUSP00000027053	retinol dehydrogenase 10 (all-trans)	Rdh10	pep chromosome:GRCm39:1:16175998:16203958:1 gene:ENSMUSG00000025921.8 transcript:ENSMUST00000027053.8 gene_biotype:protein_coding transcript_biotype:protein_coding gene_symbol:Rdh10 description:retinol dehydrogenase 10 (all-trans) [Source:MGI Symbol;Acc:MGI:1924238]	6	2	2	2	341	38.1	7.59	0.858935	0.395078	2.17409	8.85472e-07
ENSMUSP00000025476	thioredoxin-like 1	Txnl1	pep chromosome:GRCm39:18:63796438:63825393:-1 gene:ENSMUSG00000024583.4 transcript:ENSMUST00000025476.4 gene_biotype:protein_coding transcript_biotype:protein_coding gene_symbol:Txnl1 description:thioredoxin-like 1 [Source:MGI Symbol;Acc:MGI:1860078]	38	8	8	18	292	32.7	5.07	1.73786	0.801634	2.1679	9.71495e-07
ENSMUSP00000015981	sequestosome 1	Sqstm1	pep chromosome:GRCm39:11:50090193:50101618:-1 gene:ENSMUSG00000015837.16 transcript:ENSMUST00000015981.12 gene_biotype:protein_coding transcript_biotype:protein_coding gene_symbol:Sqstm1 description:sequestosome 1 [Source:MGI Symbol;Acc:MGI:107931]	22	1	5	7	404	44.2	5.44	0.617218	0.285764	2.15988	1.09542e-06
ENSMUSP00000159365	tumor necrosis factor (ligand) superfamily, member 15	Tnfsf15	pep chromosome:GRCm39:4:63642840:63663350:-1 gene:ENSMUSG00000050395.10 transcript:ENSMUST00000239480.2 gene_biotype:protein_coding transcript_biotype:protein_coding gene_symbol:Tnfsf15 description:tumor necrosis factor (ligand) superfamily, member 15 [Source:MGI Symbol;Acc:MGI:2180140]	4	1	1	1	270	29.8	8.68	1.11444	0.518631	2.14881	1.29284e-06
ENSMUSP00000032198	ubiquitin specific peptidase 18	Usp18	pep chromosome:GRCm39:6:121222865:121247876:1 gene:ENSMUSG00000030107.11 transcript:ENSMUST00000032198.11 gene_biotype:protein_coding transcript_biotype:protein_coding gene_symbol:Usp18 description:ubiquitin specific peptidase 18 [Source:MGI Symbol;Acc:MGI:1344364]	7	2	2	2	368	42.4	7.96	0.908053	0.428673	2.11829	2.03869e-06
ENSMUSP00000083587	intercellular adhesion molecule 1	Icam1	pep chromosome:GRCm39:9:20927281:20940113:1 gene:ENSMUSG00000037405.9 transcript:ENSMUST00000086399.6 gene_biotype:protein_coding transcript_biotype:protein_coding gene_symbol:Icam1 description:intercellular adhesion molecule 1 [Source:MGI Symbol;Acc:MGI:96392]	26	14	14	23	537	58.8	6.13	0.968033	0.457488	2.11598	2.11014e-06
ENSMUSP00000007275	keratin 13	Krt13	pep chromosome:GRCm39:11:100008153:100012392:-1 gene:ENSMUSG00000044041.5 transcript:ENSMUST00000007275.3 gene_biotype:protein_coding transcript_biotype:protein_coding gene_symbol:Krt13 description:keratin 13 [Source:MGI Symbol;Acc:MGI:101925]	13	1	9	28	437	47.7	4.86	0.805169	0.384578	2.09364	2.94179e-06
ENSMUSP00000064680	jun B proto-oncogene	Junb	pep chromosome:GRCm39:8:85703539:85705347:-1 gene:ENSMUSG00000052837.8 transcript:ENSMUST00000064922.7 gene_biotype:protein_coding transcript_biotype:protein_coding gene_symbol:Junb description:jun B proto-oncogene [Source:MGI Symbol;Acc:MGI:96647]	9	3	3	4	344	35.7	9.22	1.17952	0.57553	2.04945	5.66136e-06
ENSMUSP00000099888	interferon-induced protein with tetratricopeptide repeats 1	Ifit1	pep chromosome:GRCm39:19:34618271:34627409:1 gene:ENSMUSG00000034459.9 transcript:ENSMUST00000102824.4 gene_biotype:protein_coding transcript_biotype:protein_coding gene_symbol:Ifit1 description:interferon-induced protein with tetratricopeptide repeats 1 [Source:MGI Symbol;Acc:MGI:99450]	38	13	15	20	463	53.7	7.52	0.813633	0.398742	2.0405	6.46054e-06
ENSMUSP00000006956	serum amyloid A 3	Saa3	pep chromosome:GRCm39:7:46361422:46365124:-1 gene:ENSMUSG00000040026.9 transcript:ENSMUST00000006956.9 gene_biotype:protein_coding transcript_biotype:protein_coding gene_symbol:Saa3 description:serum amyloid A 3 [Source:MGI Symbol;Acc:MGI:98223]	24	3	3	6	122	13.8	9.88	0.942867	0.462714	2.03769	6.73386e-06
ENSMUSP00000020970	radical S-adenosyl methionine domain containing 2	Rsad2	pep chromosome:GRCm39:12:26492745:26506451:-1 gene:ENSMUSG00000020641.17 transcript:ENSMUST00000020970.10 gene_biotype:protein_coding transcript_biotype:protein_coding gene_symbol:Rsad2 description:radical S-adenosyl methionine domain containing 2 [Source:MGI Symbol;Acc:MGI:1929628]	20	8	8	13	362	41.5	6.21	1.02489	0.517832	1.9792	1.58859e-05
ENSMUSP00000112600	transforming growth factor beta regulated gene 1	Tbrg1	pep chromosome:GRCm39:9:37560059:37568608:-1 gene:ENSMUSG00000011114.19 transcript:ENSMUST00000117654.3 gene_biotype:protein_coding transcript_biotype:protein_coding gene_symbol:Tbrg1 description:transforming growth factor beta regulated gene 1 [Source:MGI Symbol;Acc:MGI:1100877]	2	1	1	1	406	44.9	7.59	0.750719	0.383824	1.9559	2.23093e-05
ENSMUSP00000000049	apolipoprotein H	Apoh	pep chromosome:GRCm39:11:108286119:108305222:1 gene:ENSMUSG00000000049.12 transcript:ENSMUST00000000049.6 gene_biotype:protein_coding transcript_biotype:protein_coding gene_symbol:Apoh description:apolipoprotein H [Source:MGI Symbol;Acc:MGI:88058]	3	1	1	1	345	38.6	8.22	0.910255	0.466303	1.95207	2.35857e-05
ENSMUSP00000051575	calcium homeostasis modulator family member 6	Calhm6	pep chromosome:GRCm39:10:34002063:34003980:-1 gene:ENSMUSG00000046031.8 transcript:ENSMUST00000062784.8 gene_biotype:protein_coding transcript_biotype:protein_coding gene_symbol:Calhm6 description:calcium homeostasis modulator family member 6 [Source:MGI Symbol;Acc:MGI:2443082]	5	2	2	3	313	34.9	8.28	0.426805	0.219938	1.94057	2.78694e-05
ENSMUSP00000087119	matrix metallopeptidase 14 (membrane-inserted)	Mmp14	pep chromosome:GRCm39:14:54669069:54678722:1 gene:ENSMUSG00000000957.12 transcript:ENSMUST00000089688.6 gene_biotype:protein_coding transcript_biotype:protein_coding gene_symbol:Mmp14 description:matrix metallopeptidase 14 (membrane-inserted) [Source:MGI Symbol;Acc:MGI:101900]	12	7	7	10	582	65.9	8.03	1.40609	0.726337	1.93587	2.98332e-05
ENSMUSP00000002737	alkB homolog 7	Alkbh7	pep chromosome:GRCm39:17:57304343:57306322:1 gene:ENSMUSG00000002661.15 transcript:ENSMUST00000002737.7 gene_biotype:protein_coding transcript_biotype:protein_coding gene_symbol:Alkbh7 description:alkB homolog 7 [Source:MGI Symbol;Acc:MGI:1913650]	4	1	1	1	221	25	6.54	0.838793	0.437434	1.91753	3.88897e-05
ENSMUSP00000137332	CKLF-like MARVEL transmembrane domain containing 4	Cmtm4	pep chromosome:GRCm39:8:105074823:105122439:-1 gene:ENSMUSG00000096188.2 transcript:ENSMUST00000179802.2 gene_biotype:protein_coding transcript_biotype:protein_coding gene_symbol:Cmtm4 description:CKLF-like MARVEL transmembrane domain containing 4 [Source:MGI Symbol;Acc:MGI:2142888]	4	1	1	1	208	22.9	5.59	1.64173	0.859186	1.9108	4.2854e-05
ENSMUSP00000139608	autophagy related 9A	Atg9a	pep chromosome:GRCm39:1:75157509:75167026:-1 gene:ENSMUSG00000033124.17 transcript:ENSMUST00000189820.7 gene_biotype:protein_coding transcript_biotype:protein_coding gene_symbol:Atg9a description:autophagy related 9A [Source:MGI Symbol;Acc:MGI:2138446]	1	1	1	1	847	95.2	6.9	1.11988	0.587599	1.90585	4.60169e-05
ENSMUSP00000035898	secretory carrier membrane protein 5	Scamp5	pep chromosome:GRCm39:9:57348610:57375341:-1 gene:ENSMUSG00000040722.8 transcript:ENSMUST00000046587.8 gene_biotype:protein_coding transcript_biotype:protein_coding gene_symbol:Scamp5 description:secretory carrier membrane protein 5 [Source:MGI Symbol;Acc:MGI:1928948]	8	2	2	3	235	26.1	8.54	1.38087	0.733209	1.88332	6.35954e-05
ENSMUSP00000049440	actin-related protein 2/3 complex inhibitor	Arpin	pep chromosome:GRCm39:7:79575109:79585107:-1 gene:ENSMUSG00000039043.6 transcript:ENSMUST00000048731.6 gene_biotype:protein_coding transcript_biotype:protein_coding gene_symbol:Arpin description:actin-related protein 2/3 complex inhibitor [Source:MGI Symbol;Acc:MGI:1917670]	5	1	1	1	226	25.2	5.19	1.01466	0.545809	1.859	8.99979e-05
ENSMUSP00000112534	FAM20B, glycosaminoglycan xylosylkinase	Fam20b	pep chromosome:GRCm39:1:156506102:156546642:-1 gene:ENSMUSG00000033557.18 transcript:ENSMUST00000122424.8 gene_biotype:protein_coding transcript_biotype:protein_coding gene_symbol:Fam20b description:FAM20B, glycosaminoglycan xylosylkinase [Source:MGI Symbol;Acc:MGI:2443990]	9	3	3	4	409	46.6	6.95	1.31985	0.711588	1.8548	9.55332e-05
ENSMUSP00000085293	sphingosine-1-phosphate receptor 3	S1pr3	pep chromosome:GRCm39:13:51562675:51576833:1 gene:ENSMUSG00000067586.5 transcript:ENSMUST00000087978.5 gene_biotype:protein_coding transcript_biotype:protein_coding gene_symbol:S1pr3 description:sphingosine-1-phosphate receptor 3 [Source:MGI Symbol;Acc:MGI:1339365]	4	1	1	1	378	42.2	9.55	0.690168	0.374736	1.84174	0.00011499
ENSMUSP00000035179	nudix (nucleoside diphosphate linked moiety X)-type motif 16	Nudt16	pep chromosome:GRCm39:9:105006531:105009023:-1 gene:ENSMUSG00000032565.10 transcript:ENSMUST00000035179.9 gene_biotype:protein_coding transcript_biotype:protein_coding gene_symbol:Nudt16 description:nudix (nucleoside diphosphate linked moiety X)-type motif 16 [Source:MGI Symbol;Acc:MGI:1922936]	9	2	2	2	195	21.8	7.12	2.77336	1.51636	1.82896	0.000137792
ENSMUSP00000104548	interferon regulatory factor 1	Irf1	pep chromosome:GRCm39:11:53660841:53668149:1 gene:ENSMUSG00000018899.18 transcript:ENSMUST00000108920.10 gene_biotype:protein_coding transcript_biotype:protein_coding gene_symbol:Irf1 description:interferon regulatory factor 1 [Source:MGI Symbol;Acc:MGI:96590]	5	2	2	2	329	37.3	5.6	1.29235	0.709593	1.82126	0.00015359
ENSMUSP00000062277	tripartite motif-containing 32	Trim32	pep chromosome:GRCm39:4:65523223:65534475:1 gene:ENSMUSG00000051675.14 transcript:ENSMUST00000050850.14 gene_biotype:protein_coding transcript_biotype:protein_coding gene_symbol:Trim32 description:tripartite motif-containing 32 [Source:MGI Symbol;Acc:MGI:1917057]	5	3	3	3	655	72	6.9	0.630764	0.347535	1.81497	0.000167824
ENSMUSP00000033721	Rho GTPase activating protein 6	Arhgap6	pep chromosome:GRCm39:X:167578095:168087431:1 gene:ENSMUSG00000031355.17 transcript:ENSMUST00000033721.13 gene_biotype:protein_coding transcript_biotype:protein_coding gene_symbol:Arhgap6 description:Rho GTPase activating protein 6 [Source:MGI Symbol;Acc:MGI:1196332]	1	1	1	1	987	108.8	8.28	0.798038	0.441469	1.80769	0.000185912
ENSMUSP00000019266	chemokine (C-C motif) ligand 9	Ccl9	pep chromosome:GRCm39:11:83463745:83469462:-1 gene:ENSMUSG00000019122.9 transcript:ENSMUST00000019266.6 gene_biotype:protein_coding transcript_biotype:protein_coding gene_symbol:Ccl9 description:chemokine (C-C motif) ligand 9 [Source:MGI Symbol;Acc:MGI:104533]	6	1	1	1	122	13.9	8.73	0.938299	0.520262	1.80351	0.000197124
ENSMUSP00000019997	tumor necrosis factor, alpha-induced protein 3	Tnfaip3	pep chromosome:GRCm39:10:18876658:18891158:-1 gene:ENSMUSG00000019850.12 transcript:ENSMUST00000019997.11 gene_biotype:protein_coding transcript_biotype:protein_coding gene_symbol:Tnfaip3 description:tumor necrosis factor, alpha-induced protein 3 [Source:MGI Symbol;Acc:MGI:1196377]	6	5	5	7	775	87.6	8.16	1.13384	0.629479	1.80124	0.000203508
ENSMUSP00000048770	ATPase, H+ transporting, lysosomal V1 subunit G1	Atp6v1g1	pep chromosome:GRCm39:4:63463009:63468987:1 gene:ENSMUSG00000039105.7 transcript:ENSMUST00000035301.7 gene_biotype:protein_coding transcript_biotype:protein_coding gene_symbol:Atp6v1g1 description:ATPase, H+ transporting, lysosomal V1 subunit G1 [Source:MGI Symbol;Acc:MGI:1913540]	24	2	2	4	118	13.7	7.97	1.55738	0.876411	1.77699	0.000285492
ENSMUSP00000061264	DNA segment, Chr 17, human D6S53E	D17H6S53E	pep chromosome:GRCm39:17:35345362:35347831:1 gene:ENSMUSG00000043311.8 transcript:ENSMUST00000061859.7 gene_biotype:protein_coding transcript_biotype:protein_coding gene_symbol:D17H6S53E description:DNA segment, Chr 17, human D6S53E [Source:MGI Symbol;Acc:MGI:90673]	3	1	1	1	293	32	6.89	0.893794	0.503572	1.77491	0.000293896
ENSMUSP00000016640	CD274 antigen	Cd274	pep chromosome:GRCm39:19:29344855:29365495:1 gene:ENSMUSG00000016496.8 transcript:ENSMUST00000016640.8 gene_biotype:protein_coding transcript_biotype:protein_coding gene_symbol:Cd274 description:CD274 antigen [Source:MGI Symbol;Acc:MGI:1926446]	7	2	2	3	290	32.8	6.23	1.21744	0.691936	1.75947	0.000364045
ENSMUSP00000127152	eosinophil-associated, ribonuclease A family, member 6	Ear6	pep chromosome:GRCm39:14:52091156:52092048:1 gene:ENSMUSG00000062148.7 transcript:ENSMUST00000169070.2 gene_biotype:protein_coding transcript_biotype:protein_coding gene_symbol:Ear6 description:eosinophil-associated, ribonuclease A family, member 6 [Source:MGI Symbol;Acc:MGI:1890463]	20	2	2	3	155	17.3	8.43	0.886179	0.504442	1.75675	0.000377986
ENSMUSP00000024887	NADH:ubiquinone oxidoreductase complex assembly factor 7	Ndufaf7	pep chromosome:GRCm39:17:79244565:79254928:1 gene:ENSMUSG00000024082.6 transcript:ENSMUST00000024887.6 gene_biotype:protein_coding transcript_biotype:protein_coding gene_symbol:Ndufaf7 description:NADH:ubiquinone oxidoreductase complex assembly factor 7 [Source:MGI Symbol;Acc:MGI:1920944]	9	3	3	3	436	48.4	6.95	1.39103	0.792928	1.7543	0.000391013
ENSMUSP00000100863	SAP domain containing ribonucleoprotein	Sarnp	pep chromosome:GRCm39:10:128657763:128713486:1 gene:ENSMUSG00000078427.4 transcript:ENSMUST00000105230.4 gene_biotype:protein_coding transcript_biotype:protein_coding gene_symbol:Sarnp description:SAP domain containing ribonucleoprotein [Source:MGI Symbol;Acc:MGI:1913368]	4	1	1	2	210	23.5	6.65	0.828391	0.472836	1.75196	0.000403829
ENSMUSP00000063272	activating signal cointegrator 1 complex subunit 2	Ascc2	pep chromosome:GRCm39:11:4587747:4633385:1 gene:ENSMUSG00000020412.17 transcript:ENSMUST00000070257.14 gene_biotype:protein_coding transcript_biotype:protein_coding gene_symbol:Ascc2 description:activating signal cointegrator 1 complex subunit 2 [Source:MGI Symbol;Acc:MGI:1922702]	1	1	1	1	749	85.6	5.03	0.707445	0.404442	1.74919	0.000419592
ENSMUSP00000127751	endonuclease domain containing 1	Endod1	pep chromosome:GRCm39:9:14265286:14292538:-1 gene:ENSMUSG00000037419.10 transcript:ENSMUST00000167549.2 gene_biotype:protein_coding transcript_biotype:protein_coding gene_symbol:Endod1 description:endonuclease domain containing 1 [Source:MGI Symbol;Acc:MGI:1919196]	10	4	4	4	501	55.2	6.16	0.811233	0.465027	1.74448	0.000447659
ENSMUSP00000023809	anti-Mullerian hormone type 2 receptor	Amhr2	pep chromosome:GRCm39:15:102353802:102363065:1 gene:ENSMUSG00000023047.12 transcript:ENSMUST00000023809.11 gene_biotype:protein_coding transcript_biotype:protein_coding gene_symbol:Amhr2 description:anti-Mullerian hormone type 2 receptor [Source:MGI Symbol;Acc:MGI:105062]	4	1	1	1	568	61.2	5.43	0.881383	0.506165	1.7413	0.000467724
ENSMUSP00000050687	potassium channel tetramerisation domain containing 19	Kctd19	pep chromosome:GRCm39:8:106109439:106140134:-1 gene:ENSMUSG00000051648.14 transcript:ENSMUST00000063071.13 gene_biotype:protein_coding transcript_biotype:protein_coding gene_symbol:Kctd19 description:potassium channel tetramerisation domain containing 19 [Source:MGI Symbol;Acc:MGI:3045294]	1	1	1	1	950	107.1	6.51	0.876432	0.509483	1.72024	0.00062409
ENSMUSP00000037206	FK506 binding protein 1a	Fkbp1a	pep chromosome:GRCm39:2:151384403:151403612:1 gene:ENSMUSG00000032966.15 transcript:ENSMUST00000044011.12 gene_biotype:protein_coding transcript_biotype:protein_coding gene_symbol:Fkbp1a description:FK506 binding protein 1a [Source:MGI Symbol;Acc:MGI:95541]	25	2	2	3	108	11.9	8.16	0.81699	0.4758	1.71709	0.000651497
ENSMUSP00000017153	syndecan 4	Sdc4	pep chromosome:GRCm39:2:164266167:164285106:-1 gene:ENSMUSG00000017009.4 transcript:ENSMUST00000017153.4 gene_biotype:protein_coding transcript_biotype:protein_coding gene_symbol:Sdc4 description:syndecan 4 [Source:MGI Symbol;Acc:MGI:1349164]	12	2	2	2	198	21.5	4.41	0.943422	0.551906	1.70939	0.000723426
ENSMUSP00000032260	C-type lectin domain family 2, member d	Clec2d	pep chromosome:GRCm39:6:129157578:129163497:1 gene:ENSMUSG00000030157.6 transcript:ENSMUST00000032260.6 gene_biotype:protein_coding transcript_biotype:protein_coding gene_symbol:Clec2d description:C-type lectin domain family 2, member d [Source:MGI Symbol;Acc:MGI:2135589]	13	3	3	4	207	23.6	7.62	0.972731	0.572905	1.69789	0.000845454
ENSMUSP00000028915	retinoblastoma binding protein 9, serine hydrolase	Rbbp9	pep chromosome:GRCm39:2:144384185:144392789:-1 gene:ENSMUSG00000027428.10 transcript:ENSMUST00000028915.6 gene_biotype:protein_coding transcript_biotype:protein_coding gene_symbol:Rbbp9 description:retinoblastoma binding protein 9, serine hydrolase [Source:MGI Symbol;Acc:MGI:1347074]	4	1	1	1	186	20.9	5.97	0.983333	0.57935	1.69731	0.000852208
ENSMUSP00000139147	a disintegrin and metallopeptidase domain 15 (metargidin)	Adam15	pep chromosome:GRCm39:3:89245849:89257289:-1 gene:ENSMUSG00000028041.18 transcript:ENSMUST00000184651.8 gene_biotype:protein_coding transcript_biotype:nonsense_mediated_decay gene_symbol:Adam15 description:a disintegrin and metallopeptidase domain 15 (metargidin) [Source:MGI Symbol;Acc:MGI:1333882]	6	4	4	5	864	92.6	6.54	1.17742	0.697113	1.68899	0.000953498
ENSMUSP00000025602	guanine nucleotide binding protein, alpha 14	Gna14	pep chromosome:GRCm39:19:16413126:16588184:1 gene:ENSMUSG00000024697.5 transcript:ENSMUST00000025602.4 gene_biotype:protein_coding transcript_biotype:protein_coding gene_symbol:Gna14 description:guanine nucleotide binding protein, alpha 14 [Source:MGI Symbol;Acc:MGI:95769]	11	1	4	6	355	41.5	6.3	1.54526	0.915496	1.68789	0.000967677
ENSMUSP00000148145	CCAAT/enhancer binding protein (C/EBP), delta	Cebpd	pep chromosome:GRCm39:16:15705150:15708895:1 gene:ENSMUSG00000071637.6 transcript:ENSMUST00000096232.6 gene_biotype:protein_coding transcript_biotype:protein_coding gene_symbol:Cebpd description:CCAAT/enhancer binding protein (C/EBP), delta [Source:MGI Symbol;Acc:MGI:103573]	4	1	1	1	268	28.6	7.34	0.905326	0.53788	1.68314	0.00103164
ENSMUSP00000025500	solute carrier family 27 (fatty acid transporter), member 6	Slc27a6	pep chromosome:GRCm39:18:58689329:58745845:1 gene:ENSMUSG00000024600.9 transcript:ENSMUST00000025500.7 gene_biotype:protein_coding transcript_biotype:protein_coding gene_symbol:Slc27a6 description:solute carrier family 27 (fatty acid transporter), member 6 [Source:MGI Symbol;Acc:MGI:3036230]	8	4	4	4	619	70.1	7.72	0.779065	0.462945	1.68285	0.00103571
ENSMUSP00000082548	ISG15 ubiquitin-like modifier	Isg15	pep chromosome:GRCm39:4:156283912:156285253:-1 gene:ENSMUSG00000035692.8 transcript:ENSMUST00000085425.6 gene_biotype:protein_coding transcript_biotype:protein_coding gene_symbol:Isg15 description:ISG15 ubiquitin-like modifier [Source:MGI Symbol;Acc:MGI:1855694]	29	3	3	4	161	17.9	7.9	0.791998	0.471861	1.67845	0.00109864
ENSMUSP00000061899	zinc finger and BTB domain containing 40	Zbtb40	pep chromosome:GRCm39:4:136707043:136776006:-1 gene:ENSMUSG00000060862.11 transcript:ENSMUST00000049583.8 gene_biotype:protein_coding transcript_biotype:protein_coding gene_symbol:Zbtb40 description:zinc finger and BTB domain containing 40 [Source:MGI Symbol;Acc:MGI:2682254]	1	1	1	1	1258	138.1	6.15	1.35973	0.810559	1.67752	0.00111252
ENSMUSP00000117834	ribosomal protein L29	Rpl29	pep chromosome:GRCm39:9:106306653:106308767:1 gene:ENSMUSG00000048758.15 transcript:ENSMUST00000150576.8 gene_biotype:protein_coding transcript_biotype:protein_coding gene_symbol:Rpl29 description:ribosomal protein L29 [Source:MGI Symbol;Acc:MGI:99687]	16	3	3	5	160	17.6	11.84	0.920317	0.548737	1.67715	0.00111798
ENSMUSP00000113252	Ras association (RalGDS/AF-6) domain family member 1	Rassf1	pep chromosome:GRCm39:9:107428766:107439462:1 gene:ENSMUSG00000010067.14 transcript:ENSMUST00000122225.8 gene_biotype:protein_coding transcript_biotype:protein_coding gene_symbol:Rassf1 description:Ras association (RalGDS/AF-6) domain family member 1 [Source:MGI Symbol;Acc:MGI:1928386]	2	1	1	1	344	39.1	8.94	1.44572	0.862291	1.6766	0.00112632
ENSMUSP00000047356	interferon gamma induced GTPase	Igtp	pep chromosome:GRCm39:11:58090382:58098417:1 gene:ENSMUSG00000078853.9 transcript:ENSMUST00000035266.11 gene_biotype:protein_coding transcript_biotype:protein_coding gene_symbol:Igtp description:interferon gamma induced GTPase [Source:MGI Symbol;Acc:MGI:107729]	15	4	5	6	423	48.5	7.77	1.16054	0.692966	1.67475	0.00115466
ENSMUSP00000019942	androgen-induced 1	Aig1	pep chromosome:GRCm39:10:13528195:13744701:-1 gene:ENSMUSG00000019806.14 transcript:ENSMUST00000019942.6 gene_biotype:protein_coding transcript_biotype:protein_coding gene_symbol:Aig1 description:androgen-induced 1 [Source:MGI Symbol;Acc:MGI:1913503]	3	1	1	1	262	29.7	8.07	1.52135	0.910012	1.67179	0.00120134
ENSMUSP00000110897	S-adenosylhomocysteine hydrolase-like 2	Ahcyl2	pep chromosome:GRCm39:6:29768491:29912309:1 gene:ENSMUSG00000029772.18 transcript:ENSMUST00000115242.9 gene_biotype:protein_coding transcript_biotype:protein_coding gene_symbol:Ahcyl2 description:S-adenosylhomocysteine hydrolase-like 2 [Source:MGI Symbol;Acc:MGI:1921590]	21	4	13	25	613	66.9	7.36	1.04712	0.633248	1.65357	0.00153165
ENSMUSP00000056669	CD14 antigen	Cd14	pep chromosome:GRCm39:18:36858120:36859851:-1 gene:ENSMUSG00000051439.8 transcript:ENSMUST00000061829.8 gene_biotype:protein_coding transcript_biotype:protein_coding gene_symbol:Cd14 description:CD14 antigen [Source:MGI Symbol;Acc:MGI:88318]	38	11	11	32	366	39.2	5.21	0.797331	0.485271	1.64306	0.00176043
ENSMUSP00000026989	RIKEN cDNA 4833439L19 gene	4833439L19Rik	pep chromosome:GRCm39:13:54699031:54713248:-1 gene:ENSMUSG00000025871.19 transcript:ENSMUST00000026989.15 gene_biotype:protein_coding transcript_biotype:protein_coding gene_symbol:4833439L19Rik description:RIKEN cDNA 4833439L19 gene [Source:MGI Symbol;Acc:MGI:1921162]	3	1	1	1	303	32.7	9.42	0.952369	0.582035	1.63627	0.00192541
ENSMUSP00000025050	nudix (nucleotide diphosphate linked moiety X)-type motif 3	Nudt3	pep chromosome:GRCm39:17:27798356:27842469:-1 gene:ENSMUSG00000024213.15 transcript:ENSMUST00000025050.13 gene_biotype:protein_coding transcript_biotype:protein_coding gene_symbol:Nudt3 description:nudix (nucleotide diphosphate linked moiety X)-type motif 3 [Source:MGI Symbol;Acc:MGI:1928484]	24	4	4	4	168	19	6.34	0.884284	0.543167	1.62801	0.0021463
ENSMUSP00000029900	ATPase, H+ transporting, lysosomal V0 subunit D2	Atp6v0d2	pep chromosome:GRCm39:4:19876841:19922605:-1 gene:ENSMUSG00000028238.7 transcript:ENSMUST00000029900.6 gene_biotype:protein_coding transcript_biotype:protein_coding gene_symbol:Atp6v0d2 description:ATPase, H+ transporting, lysosomal V0 subunit D2 [Source:MGI Symbol;Acc:MGI:1924415]	43	9	9	11	350	40.5	5.25	1.22613	0.75347	1.62731	0.00216616
ENSMUSP00000120525	interferon regulatory factor 9	Irf9	pep chromosome:GRCm39:14:55841028:55847487:1 gene:ENSMUSG00000002325.16 transcript:ENSMUST00000134863.8 gene_biotype:protein_coding transcript_biotype:protein_coding gene_symbol:Irf9 description:interferon regulatory factor 9 [Source:MGI Symbol;Acc:MGI:107587]	2	1	1	1	465	51.5	7.53	1.26953	0.782084	1.62327	0.00228411
ENSMUSP00000109257	protein (peptidyl-prolyl cis/trans isomerase) NIMA-interacting, 4 (parvulin)	Pin4	pep chromosome:GRCm39:X:101163053:101171275:1 gene:ENSMUSG00000079480.4 transcript:ENSMUST00000113627.4 gene_biotype:protein_coding transcript_biotype:protein_coding gene_symbol:Pin4 description:protein (peptidyl-prolyl cis/trans isomerase) NIMA-interacting, 4 (parvulin) [Source:MGI Symbol;Acc:MGI:1916963]	22	3	3	3	131	13.8	9.77	1.0571	0.653088	1.61862	0.0024272
ENSMUSP00000069850	CCAAT/enhancer binding protein (C/EBP), beta	Cebpb	pep chromosome:GRCm39:2:167530835:167532338:1 gene:ENSMUSG00000056501.4 transcript:ENSMUST00000070642.4 gene_biotype:protein_coding transcript_biotype:protein_coding gene_symbol:Cebpb description:CCAAT/enhancer binding protein (C/EBP), beta [Source:MGI Symbol;Acc:MGI:88373]	3	1	1	2	296	31.4	8.56	0.97117	0.600812	1.61643	0.00249773
ENSMUSP00000000175	succinate dehydrogenase complex, subunit D, integral membrane protein	Sdhd	pep chromosome:GRCm39:9:50507657:50515112:-1 gene:ENSMUSG00000000171.6 transcript:ENSMUST00000000175.6 gene_biotype:protein_coding transcript_biotype:protein_coding gene_symbol:Sdhd description:succinate dehydrogenase complex, subunit D, integral membrane protein [Source:MGI Symbol;Acc:MGI:1914175]	11	2	2	4	159	17	9.1	1.03921	0.643181	1.61573	0.00252053
ENSMUSP00000058109	tripartite motif-containing 56	Trim56	pep chromosome:GRCm39:5:137134498:137145061:-1 gene:ENSMUSG00000043279.10 transcript:ENSMUST00000054384.6 gene_biotype:protein_coding transcript_biotype:protein_coding gene_symbol:Trim56 description:tripartite motif-containing 56 [Source:MGI Symbol;Acc:MGI:2685298]	6	4	4	4	734	79.5	7.88	1.09007	0.675797	1.61301	0.00261158
ENSMUSP00000047700	charged multivesicular body protein 7	Chmp7	pep chromosome:GRCm39:14:69954449:69969983:-1 gene:ENSMUSG00000034190.10 transcript:ENSMUST00000036381.10 gene_biotype:protein_coding transcript_biotype:protein_coding gene_symbol:Chmp7 description:charged multivesicular body protein 7 [Source:MGI Symbol;Acc:MGI:1913922]	4	2	2	3	451	50.6	5.22	0.795284	0.494039	1.60976	0.00272453
ENSMUSP00000027401	serine/threonine kinase 16	Stk16	pep chromosome:GRCm39:1:75187482:75192250:1 gene:ENSMUSG00000026201.13 transcript:ENSMUST00000027401.11 gene_biotype:protein_coding transcript_biotype:protein_coding gene_symbol:Stk16 description:serine/threonine kinase 16 [Source:MGI Symbol;Acc:MGI:1313271]	3	1	1	1	305	34.4	6.46	0.929751	0.578326	1.60766	0.00279995
ENSMUSP00000028881	interleukin 1 beta	Il1b	pep chromosome:GRCm39:2:129206490:129213059:-1 gene:ENSMUSG00000027398.14 transcript:ENSMUST00000028881.14 gene_biotype:protein_coding transcript_biotype:protein_coding gene_symbol:Il1b description:interleukin 1 beta [Source:MGI Symbol;Acc:MGI:96543]	11	3	3	6	269	30.9	4.7	0.800351	0.498264	1.60628	0.00285064
ENSMUSP00000027639	macrophage receptor with collagenous structure	Marco	pep chromosome:GRCm39:1:120402267:120432753:-1 gene:ENSMUSG00000026390.8 transcript:ENSMUST00000027639.8 gene_biotype:protein_coding transcript_biotype:protein_coding gene_symbol:Marco description:macrophage receptor with collagenous structure [Source:MGI Symbol;Acc:MGI:1309998]	4	2	2	2	518	52.7	7.84	1.30971	0.816141	1.60475	0.00290756
ENSMUSP00000092041	selenoprotein M	Selenom	pep chromosome:GRCm39:11:3464867:3467351:1 gene:ENSMUSG00000075702.11 transcript:ENSMUST00000094469.6 gene_biotype:protein_coding transcript_biotype:protein_coding gene_symbol:Selenom description:selenoprotein M [Source:MGI Symbol;Acc:MGI:2149786]	10	1	1	1	145	16.4	5.54	0.675165	0.420988	1.60376	0.00294524
ENSMUSP00000113244	zinc finger protein 946	Zfp946	pep chromosome:GRCm39:17:22643240:22675670:1 gene:ENSMUSG00000071266.14 transcript:ENSMUST00000120222.8 gene_biotype:protein_coding transcript_biotype:protein_coding gene_symbol:Zfp946 description:zinc finger protein 946 [Source:MGI Symbol;Acc:MGI:1921399]	2	1	1	1	523	61.1	8.76	0.726099	0.45345	1.60128	0.00304166
ENSMUSP00000080717	chitinase-like 1	Chil1	pep chromosome:GRCm39:1:134110142:134117767:1 gene:ENSMUSG00000064246.11 transcript:ENSMUST00000082060.10 gene_biotype:protein_coding transcript_biotype:protein_coding gene_symbol:Chil1 description:chitinase-like 1 [Source:MGI Symbol;Acc:MGI:1340899]	5	2	2	2	389	43.9	8.57	0.981998	0.614867	1.59709	0.00321094
ENSMUSP00000033570	immunoglobulin (CD79A) binding protein 1	Igbp1	pep chromosome:GRCm39:X:99537897:99559731:1 gene:ENSMUSG00000031221.8 transcript:ENSMUST00000033570.6 gene_biotype:protein_coding transcript_biotype:protein_coding gene_symbol:Igbp1 description:immunoglobulin (CD79A) binding protein 1 [Source:MGI Symbol;Acc:MGI:1346500]	4	1	1	1	340	38.9	6.18	0.918444	0.576282	1.59374	0.00335288
ENSMUSP00000037035	MINDY lysine 48 deubiquitinase 2	Mindy2	pep chromosome:GRCm39:9:70506296:70564456:-1 gene:ENSMUSG00000042444.11 transcript:ENSMUST00000049031.6 gene_biotype:protein_coding transcript_biotype:protein_coding gene_symbol:Mindy2 description:MINDY lysine 48 deubiquitinase 2 [Source:MGI Symbol;Acc:MGI:2443086]	2	1	1	1	601	65.6	4.63	1.14929	0.721719	1.59243	0.00341005
ENSMUSP00000044050	dipeptidylpeptidase 4	Dpp4	pep chromosome:GRCm39:2:62160417:62242575:-1 gene:ENSMUSG00000035000.9 transcript:ENSMUST00000047812.8 gene_biotype:protein_coding transcript_biotype:protein_coding gene_symbol:Dpp4 description:dipeptidylpeptidase 4 [Source:MGI Symbol;Acc:MGI:94919]	1	1	1	1	760	87.4	6.42	0.90722	0.570487	1.59026	0.00350692
ENSMUSP00000150145	CLIP associating protein 2	Clasp2	pep chromosome:GRCm39:9:113570541:113747865:1 gene:ENSMUSG00000033392.17 transcript:ENSMUST00000213663.2 gene_biotype:protein_coding transcript_biotype:protein_coding gene_symbol:Clasp2 description:CLIP associating protein 2 [Source:MGI Symbol;Acc:MGI:1923749]	8	1	4	4	600	66.3	6.55	1.21419	0.766379	1.58432	0.00378495
ENSMUSP00000074775	haloacid dehalogenase like hydrolase domain containing 5	Hdhd5	pep chromosome:GRCm39:6:120486455:120508280:-1 gene:ENSMUSG00000058979.8 transcript:ENSMUST00000075303.7 gene_biotype:protein_coding transcript_biotype:protein_coding gene_symbol:Hdhd5 description:haloacid dehalogenase like hydrolase domain containing 5 [Source:MGI Symbol;Acc:MGI:2136976]	3	1	1	2	419	46.3	7.88	1.16508	0.736068	1.58284	0.00385781
ENSMUSP00000110102	nuclear factor of kappa light polypeptide gene enhancer in B cells inhibitor, zeta	Nfkbiz	pep chromosome:GRCm39:16:55631738:55642501:-1 gene:ENSMUSG00000035356.18 transcript:ENSMUST00000114458.8 gene_biotype:protein_coding transcript_biotype:protein_coding gene_symbol:Nfkbiz description:nuclear factor of kappa light polypeptide gene enhancer in B cells inhibitor, zeta [Source:MGI Symbol;Acc:MGI:1931595]	12	6	7	7	728	79	6.93	1.0523	0.665672	1.5808	0.0039597
ENSMUSP00000150761	olfactory receptor 148	Olfr148	pep chromosome:GRCm39:9:39521951:39527223:1 gene:ENSMUSG00000048299.9 transcript:ENSMUST00000216801.3 gene_biotype:protein_coding transcript_biotype:protein_coding gene_symbol:Olfr148 description:olfactory receptor 148 [Source:MGI Symbol;Acc:MGI:2660713]	3	1	1	2	310	34.6	8.76	1.23311	0.780168	1.58057	0.00397167
ENSMUSP00000159138	NADH:ubiquinone oxidoreductase subunit B1	Ndufb1	pep chromosome:GRCm39:12:101934349:101942513:-1 gene:ENSMUSG00000113902.2 transcript:ENSMUST00000221422.2 gene_biotype:protein_coding transcript_biotype:protein_coding gene_symbol:Ndufb1 description:NADH:ubiquinone oxidoreductase subunit B1 [Source:MGI Symbol;Acc:MGI:3780865]	19	1	1	2	57	7	8.21	1.20948	0.77092	1.56888	0.00461084
ENSMUSP00000099890	interferon-induced protein with tetratricopeptide repeats 2	Ifit2	pep chromosome:GRCm39:19:34528110:34553819:1 gene:ENSMUSG00000045932.13 transcript:ENSMUST00000102826.4 gene_biotype:protein_coding transcript_biotype:protein_coding gene_symbol:Ifit2 description:interferon-induced protein with tetratricopeptide repeats 2 [Source:MGI Symbol;Acc:MGI:99449]	21	9	9	10	470	54.7	7.43	0.882003	0.563084	1.56638	0.00475995
ENSMUSP00000037657	poly (ADP-ribose) polymerase family, member 14	Parp14	pep chromosome:GRCm39:16:35653244:35691914:-1 gene:ENSMUSG00000034422.15 transcript:ENSMUST00000042665.9 gene_biotype:protein_coding transcript_biotype:protein_coding gene_symbol:Parp14 description:poly (ADP-ribose) polymerase family, member 14 [Source:MGI Symbol;Acc:MGI:1919489]	23	42	42	53	1817	203.7	6.79	0.774193	0.495793	1.56152	0.0050624
ENSMUSP00000064423	phospholipid phosphatase 1	Plpp1	pep chromosome:GRCm39:13:112937397:113004176:1 gene:ENSMUSG00000021759.15 transcript:ENSMUST00000070951.8 gene_biotype:protein_coding transcript_biotype:protein_coding gene_symbol:Plpp1 description:phospholipid phosphatase 1 [Source:MGI Symbol;Acc:MGI:108412]	4	1	1	1	283	31.9	7.02	1.63447	1.04805	1.55953	0.00519176
ENSMUSP00000069851	inositol 1,4,5-trisphosphate 3-kinase B	Itpkb	pep chromosome:GRCm39:1:180158050:180252367:1 gene:ENSMUSG00000038855.11 transcript:ENSMUST00000070181.7 gene_biotype:protein_coding transcript_biotype:protein_coding gene_symbol:Itpkb description:inositol 1,4,5-trisphosphate 3-kinase B [Source:MGI Symbol;Acc:MGI:109235]	1	1	1	1	942	102.6	8	0.672545	0.431385	1.55904	0.00522438
ENSMUSP00000104957	mitochondrial ribosomal protein S36	Mrps36	pep chromosome:GRCm39:13:100872463:100881167:-1 gene:ENSMUSG00000061474.12 transcript:ENSMUST00000109333.8 gene_biotype:protein_coding transcript_biotype:protein_coding gene_symbol:Mrps36 description:mitochondrial ribosomal protein S36 [Source:MGI Symbol;Acc:MGI:1913378]	33	2	2	4	102	11.1	9.99	1.22228	0.784833	1.55738	0.00533492
ENSMUSP00000033560	oligophrenin 1	Ophn1	pep chromosome:GRCm39:X:97597883:97934591:-1 gene:ENSMUSG00000031214.14 transcript:ENSMUST00000033560.9 gene_biotype:protein_coding transcript_biotype:protein_coding gene_symbol:Ophn1 description:oligophrenin 1 [Source:MGI Symbol;Acc:MGI:2151070]	3	3	3	3	802	91.9	7.96	1.51063	0.970171	1.55708	0.00535533
ENSMUSP00000004968	procollagen-lysine, 2-oxoglutarate 5-dioxygenase 3	Plod3	pep chromosome:GRCm39:5:137015873:137025502:1 gene:ENSMUSG00000004846.11 transcript:ENSMUST00000004968.11 gene_biotype:protein_coding transcript_biotype:protein_coding gene_symbol:Plod3 description:procollagen-lysine, 2-oxoglutarate 5-dioxygenase 3 [Source:MGI Symbol;Acc:MGI:1347008]	18	12	13	22	741	84.9	6.23	0.851855	0.547929	1.55468	0.00552011
ENSMUSP00000132435	guanylate binding protein 2	Gbp2	pep chromosome:GRCm39:3:142326363:142343769:1 gene:ENSMUSG00000028270.13 transcript:ENSMUST00000165774.8 gene_biotype:protein_coding transcript_biotype:protein_coding gene_symbol:Gbp2 description:guanylate binding protein 2 [Source:MGI Symbol;Acc:MGI:102772]	13	9	9	13	589	66.7	5.71	0.773635	0.497779	1.55417	0.00555568
ENSMUSP00000069004	ribosomal protein S15	Rps15	pep chromosome:GRCm39:10:80128287:80129948:1 gene:ENSMUSG00000063457.15 transcript:ENSMUST00000068408.14 gene_biotype:protein_coding transcript_biotype:protein_coding gene_symbol:Rps15 description:ribosomal protein S15 [Source:MGI Symbol;Acc:MGI:98117]	14	3	3	6	145	17	10.39	1.05084	0.676476	1.5534	0.00561001
ENSMUSP00000015540	CD83 antigen	Cd83	pep chromosome:GRCm39:13:43938251:43956608:1 gene:ENSMUSG00000015396.5 transcript:ENSMUST00000015540.4 gene_biotype:protein_coding transcript_biotype:protein_coding gene_symbol:Cd83 description:CD83 antigen [Source:MGI Symbol;Acc:MGI:1328316]	17	3	3	3	196	21.3	7.87	0.834883	0.537615	1.55294	0.0056429
ENSMUSP00000033643	glycosyltransferase 28 domain containing 2	Glt28d2	pep chromosome:GRCm39:3:85777156:85794823:-1 gene:ENSMUSG00000031286.7 transcript:ENSMUST00000033643.6 gene_biotype:protein_coding transcript_biotype:protein_coding gene_symbol:Glt28d2 description:glycosyltransferase 28 domain containing 2 [Source:MGI Symbol;Acc:MGI:2443773]	7	1	1	1	165	18.4	6.67	2.05245	1.32857	1.54486	0.00624698
ENSMUSP00000027302	protein tyrosine phosphatase, non-receptor type 18	Ptpn18	pep chromosome:GRCm39:1:34498846:34512865:1 gene:ENSMUSG00000026126.16 transcript:ENSMUST00000027302.14 gene_biotype:protein_coding transcript_biotype:protein_coding gene_symbol:Ptpn18 description:protein tyrosine phosphatase, non-receptor type 18 [Source:MGI Symbol;Acc:MGI:108410]	7	1	1	1	453	50.2	8.27	1.84102	1.19177	1.54477	0.0062538
ENSMUSP00000157167	NLR family, CARD domain containing 4	Nlrc4	pep chromosome:GRCm39:17:74733823:74755201:-1 gene:ENSMUSG00000039193.10 transcript:ENSMUST00000234086.2 gene_biotype:protein_coding transcript_biotype:protein_coding gene_symbol:Nlrc4 description:NLR family, CARD domain containing 4 [Source:MGI Symbol;Acc:MGI:3036243]	1	1	1	1	1036	118	6.06	0.638608	0.414526	1.54058	0.00659127
ENSMUSP00000033053	integrin alpha X	Itgax	pep chromosome:GRCm39:7:127728719:127749829:1 gene:ENSMUSG00000030789.10 transcript:ENSMUST00000033053.8 gene_biotype:protein_coding transcript_biotype:protein_coding gene_symbol:Itgax description:integrin alpha X [Source:MGI Symbol;Acc:MGI:96609]	22	24	24	33	1169	129.1	6.64	1.26154	0.819365	1.53965	0.00666765
ENSMUSP00000106087	myosin X	Myo10	pep chromosome:GRCm39:15:25622611:25813759:1 gene:ENSMUSG00000022272.18 transcript:ENSMUST00000110457.8 gene_biotype:protein_coding transcript_biotype:protein_coding gene_symbol:Myo10 description:myosin X [Source:MGI Symbol;Acc:MGI:107716]	2	5	5	5	2062	237.2	6.25	1.1403	0.741546	1.53774	0.00682927
ENSMUSP00000053916	DnaJ heat shock protein family (Hsp40) member B4	Dnajb4	pep chromosome:GRCm39:3:151889592:151899482:-1 gene:ENSMUSG00000028035.14 transcript:ENSMUST00000050073.13 gene_biotype:protein_coding transcript_biotype:protein_coding gene_symbol:Dnajb4 description:DnaJ heat shock protein family (Hsp40) member B4 [Source:MGI Symbol;Acc:MGI:1914285]	23	6	7	8	337	37.8	8.59	0.843649	0.550957	1.53124	0.00740544
ENSMUSP00000091474	G protein-coupled receptor 179	Gpr179	pep chromosome:GRCm39:11:97222935:97242842:-1 gene:ENSMUSG00000070337.5 transcript:ENSMUST00000093942.5 gene_biotype:protein_coding transcript_biotype:protein_coding gene_symbol:Gpr179 description:G protein-coupled receptor 179 [Source:MGI Symbol;Acc:MGI:2443409]	0	1	1	1	2293	248.6	5.55	0.325529	0.213641	1.52372	0.00813093
ENSMUSP00000058629	frizzled class receptor 1	Fzd1	pep chromosome:GRCm39:5:4803839:4808035:-1 gene:ENSMUSG00000044674.7 transcript:ENSMUST00000054294.7 gene_biotype:protein_coding transcript_biotype:protein_coding gene_symbol:Fzd1 description:frizzled class receptor 1 [Source:MGI Symbol;Acc:MGI:1196625]	3	2	2	2	642	71.1	7.71	1.04645	0.686803	1.52366	0.00813675
ENSMUSP00000081122	phospholipase C, eta 1	Plch1	pep chromosome:GRCm39:3:63603658:63758412:-1 gene:ENSMUSG00000036834.17 transcript:ENSMUST00000084105.12 gene_biotype:protein_coding transcript_biotype:protein_coding gene_symbol:Plch1 description:phospholipase C, eta 1 [Source:MGI Symbol;Acc:MGI:2683547]	0	1	1	2	1682	187.6	7.33	1.09308	0.717877	1.52265	0.00823874
ENSMUSP00000121127	guanine nucleotide binding protein (G protein), beta 4	Gnb4	pep chromosome:GRCm39:3:32634481:32670734:-1 gene:ENSMUSG00000027669.15 transcript:ENSMUST00000155737.8 gene_biotype:protein_coding transcript_biotype:protein_coding gene_symbol:Gnb4 description:guanine nucleotide binding protein (G protein), beta 4 [Source:MGI Symbol;Acc:MGI:104581]	21	2	6	20	340	37.4	6.16	1.57569	1.03497	1.52246	0.00825872
ENSMUSP00000142428	S100 calcium binding protein A14	S100a14	pep chromosome:GRCm39:3:90434163:90435537:1 gene:ENSMUSG00000042306.12 transcript:ENSMUST00000199538.5 gene_biotype:protein_coding transcript_biotype:protein_coding gene_symbol:S100a14 description:S100 calcium binding protein A14 [Source:MGI Symbol;Acc:MGI:1913416]	7	1	1	1	104	11.6	5.5	1.14922	0.757677	1.51677	0.00885944
ENSMUSP00000019945	peroxisomal biogenesis factor 3	Pex3	pep chromosome:GRCm39:10:13399860:13428883:-1 gene:ENSMUSG00000019809.17 transcript:ENSMUST00000019945.15 gene_biotype:protein_coding transcript_biotype:protein_coding gene_symbol:Pex3 description:peroxisomal biogenesis factor 3 [Source:MGI Symbol;Acc:MGI:1929646]	5	2	2	2	372	42.2	7.77	1.04963	0.692275	1.5162	0.0089221
ENSMUSP00000027414	serine/threonine kinase 11 interacting protein	Stk11ip	pep chromosome:GRCm39:1:75498173:75513979:1 gene:ENSMUSG00000026213.16 transcript:ENSMUST00000027414.16 gene_biotype:protein_coding transcript_biotype:protein_coding gene_symbol:Stk11ip description:serine/threonine kinase 11 interacting protein [Source:MGI Symbol;Acc:MGI:1918978]	4	4	4	4	1072	117.9	4.96	0.792826	0.523109	1.5156	0.00898817
ENSMUSP00000071715	IQ motif containing GTPase activating protein 3	Iqgap3	pep chromosome:GRCm39:3:87989278:88028355:1 gene:ENSMUSG00000028068.15 transcript:ENSMUST00000071812.11 gene_biotype:protein_coding transcript_biotype:protein_coding gene_symbol:Iqgap3 description:IQ motif containing GTPase activating protein 3 [Source:MGI Symbol;Acc:MGI:3028642]	1	1	2	4	1632	185.2	7.52	1.09815	0.72535	1.51396	0.00917226
ENSMUSP00000022099	lysophosphatidylcholine acyltransferase 1	Lpcat1	pep chromosome:GRCm39:13:73615316:73664541:1 gene:ENSMUSG00000021608.16 transcript:ENSMUST00000022099.15 gene_biotype:protein_coding transcript_biotype:protein_coding gene_symbol:Lpcat1 description:lysophosphatidylcholine acyltransferase 1 [Source:MGI Symbol;Acc:MGI:2384812]	5	3	3	3	534	59.7	6.34	1.48098	0.978579	1.5134	0.00923563
ENSMUSP00000099534	beta-2 microglobulin	B2m	pep chromosome:GRCm39:2:121978167:121983564:1 gene:ENSMUSG00000060802.9 transcript:ENSMUST00000102476.5 gene_biotype:protein_coding transcript_biotype:protein_coding gene_symbol:B2m description:beta-2 microglobulin [Source:MGI Symbol;Acc:MGI:88127]	15	2	2	11	119	13.8	8.44	1.15546	0.764418	1.51155	0.00944768
ENSMUSP00000104485	antioxidant 1 copper chaperone	Atox1	pep chromosome:GRCm39:11:55337467:55352065:-1 gene:ENSMUSG00000018585.10 transcript:ENSMUST00000108857.2 gene_biotype:protein_coding transcript_biotype:protein_coding gene_symbol:Atox1 description:antioxidant 1 copper chaperone [Source:MGI Symbol;Acc:MGI:1333855]	57	3	3	6	68	7.3	6.51	1.45663	0.964206	1.51071	0.00954629
ENSMUSP00000095171	CD74 antigen (invariant polypeptide of major histocompatibility complex, class II antigen-associated)	Cd74	pep chromosome:GRCm39:18:60936920:60945718:1 gene:ENSMUSG00000024610.16 transcript:ENSMUST00000097563.9 gene_biotype:protein_coding transcript_biotype:protein_coding gene_symbol:Cd74 description:CD74 antigen (invariant polypeptide of major histocompatibility complex, class II antigen-associated) [Source:MGI Symbol;Acc:MGI:96534]	23	7	7	25	279	31.5	8.34	1.3865	0.919299	1.50821	0.00984319
ENSMUSP00000103056	zinc finger and BTB domain containing 7B	Zbtb7b	pep chromosome:GRCm39:3:89284951:89294496:-1 gene:ENSMUSG00000028042.16 transcript:ENSMUST00000107433.8 gene_biotype:protein_coding transcript_biotype:protein_coding gene_symbol:Zbtb7b description:zinc finger and BTB domain containing 7B [Source:MGI Symbol;Acc:MGI:102755]	2	1	1	1	544	58.9	5.77	1.04788	0.69748	1.50238	0.0105716
ENSMUSP00000031542	2'-5' oligoadenylate synthetase-like 2	Oasl2	pep chromosome:GRCm39:5:115034997:115050295:1 gene:ENSMUSG00000029561.18 transcript:ENSMUST00000031542.13 gene_biotype:protein_coding transcript_biotype:protein_coding gene_symbol:Oasl2 description:2'-5' oligoadenylate synthetase-like 2 [Source:MGI Symbol;Acc:MGI:1344390]	2	1	1	1	508	58.7	6.4	0.843475	0.561507	1.50216	0.0105991
ENSMUSP00000032239	C-type lectin domain family 4, member e	Clec4e	pep chromosome:GRCm39:6:123258748:123266829:-1 gene:ENSMUSG00000030142.11 transcript:ENSMUST00000032239.11 gene_biotype:protein_coding transcript_biotype:protein_coding gene_symbol:Clec4e description:C-type lectin domain family 4, member e [Source:MGI Symbol;Acc:MGI:1861232]	16	3	3	3	214	24.4	5.81	1.04834	0.699002	1.49976	0.0109141
ENSMUSP00000022009	centrin 3	Cetn3	pep chromosome:GRCm39:13:81931196:81945274:1 gene:ENSMUSG00000021537.10 transcript:ENSMUST00000022009.10 gene_biotype:protein_coding transcript_biotype:protein_coding gene_symbol:Cetn3 description:centrin 3 [Source:MGI Symbol;Acc:MGI:1097706]	10	2	2	2	167	19.5	4.78	0.618204	0.41247	1.49879	0.0110447
ENSMUSP00000018610	nitric oxide synthase 2, inducible	Nos2	pep chromosome:GRCm39:11:78811613:78851080:1 gene:ENSMUSG00000020826.10 transcript:ENSMUST00000018610.7 gene_biotype:protein_coding transcript_biotype:protein_coding gene_symbol:Nos2 description:nitric oxide synthase 2, inducible [Source:MGI Symbol;Acc:MGI:97361]	4	5	5	5	1144	130.5	7.72	0.64428	0.43001	1.49829	0.0111118
ENSMUSP00000046732	nucleoporin 43	Nup43	pep chromosome:GRCm39:10:7543267:7554645:1 gene:ENSMUSG00000040034.16 transcript:ENSMUST00000040135.9 gene_biotype:protein_coding transcript_biotype:protein_coding gene_symbol:Nup43 description:nucleoporin 43 [Source:MGI Symbol;Acc:MGI:1917162]	4	2	2	2	380	42	5.39	0.64492	0.430935	1.49656	0.0113479
ENSMUSP00000058042	RAB11 family interacting protein 1 (class I)	Rab11fip1	pep chromosome:GRCm39:8:27628801:27664674:-1 gene:ENSMUSG00000031488.15 transcript:ENSMUST00000054212.7 gene_biotype:protein_coding transcript_biotype:protein_coding gene_symbol:Rab11fip1 description:RAB11 family interacting protein 1 (class I) [Source:MGI Symbol;Acc:MGI:1923017]	5	5	5	7	1166	124.9	5.8	1.1794	0.788777	1.49523	0.0115338
ENSMUSP00000054856	ubiquinol-cytochrome c reductase, complex III subunit X	Uqcr10	pep chromosome:GRCm39:11:4651973:4654342:-1 gene:ENSMUSG00000059534.9 transcript:ENSMUST00000058407.6 gene_biotype:protein_coding transcript_biotype:protein_coding gene_symbol:Uqcr10 description:ubiquinol-cytochrome c reductase, complex III subunit X [Source:MGI Symbol;Acc:MGI:1913402]	27	1	1	2	64	7.4	9.19	0.785944	0.525804	1.49475	0.0116008
ENSMUSP00000066303	NADH:ubiquinone oxidoreductase core subunit V3	Ndufv3	pep chromosome:GRCm39:17:31739089:31750305:1 gene:ENSMUSG00000024038.18 transcript:ENSMUST00000064798.16 gene_biotype:protein_coding transcript_biotype:protein_coding gene_symbol:Ndufv3 description:NADH:ubiquinone oxidoreductase core subunit V3 [Source:MGI Symbol;Acc:MGI:1890894]	11	1	1	2	104	11.8	9.35	1.4902	0.996971	1.49473	0.0116041
ENSMUSP00000041380	coiled-coil-helix-coiled-coil-helix domain containing 4	Chchd4	pep chromosome:GRCm39:6:91439154:91450528:-1 gene:ENSMUSG00000034203.9 transcript:ENSMUST00000040835.9 gene_biotype:protein_coding transcript_biotype:protein_coding gene_symbol:Chchd4 description:coiled-coil-helix-coiled-coil-helix domain containing 4 [Source:MGI Symbol;Acc:MGI:1919420]	10	1	1	1	139	15.5	4.32	1.44011	0.964504	1.49311	0.011834
ENSMUSP00000021203	translocase of inner mitochondrial membrane 22	Timm22	pep chromosome:GRCm39:11:76297969:76307118:1 gene:ENSMUSG00000020843.16 transcript:ENSMUST00000021203.7 gene_biotype:protein_coding transcript_biotype:protein_coding gene_symbol:Timm22 description:translocase of inner mitochondrial membrane 22 [Source:MGI Symbol;Acc:MGI:1929742]	4	1	1	1	194	20.1	8.22	0.957932	0.642334	1.49133	0.012092
ENSMUSP00000006667	GTPase, very large interferon inducible 1	Gvin1	pep chromosome:GRCm39:7:105755763:105814517:-1 gene:ENSMUSG00000045868.13 transcript:ENSMUST00000006667.11 gene_biotype:protein_coding transcript_biotype:protein_coding gene_symbol:Gvin1 description:GTPase, very large interferon inducible 1 [Source:MGI Symbol;Acc:MGI:1921808]	2	5	5	7	2427	280.6	6.57	1.00426	0.674158	1.48965	0.0123412
ENSMUSP00000031840	glycoprotein (transmembrane) nmb	Gpnmb	pep chromosome:GRCm39:6:49013549:49035116:1 gene:ENSMUSG00000029816.11 transcript:ENSMUST00000031840.10 gene_biotype:protein_coding transcript_biotype:protein_coding gene_symbol:Gpnmb description:glycoprotein (transmembrane) nmb [Source:MGI Symbol;Acc:MGI:1934765]	23	11	11	58	574	63.6	7.61	2.02442	1.35905	1.48958	0.0123512
ENSMUSP00000033821	coagulation factor X	F10	pep chromosome:GRCm39:8:13087322:13105900:1 gene:ENSMUSG00000031444.17 transcript:ENSMUST00000033821.11 gene_biotype:protein_coding transcript_biotype:protein_coding gene_symbol:F10 description:coagulation factor X [Source:MGI Symbol;Acc:MGI:103107]	2	1	1	1	493	55.2	5.64	1.05293	0.707184	1.4889	0.0124528
ENSMUSP00000088291	OTU domain containing 7B	Otud7b	pep chromosome:GRCm39:3:96011839:96068446:1 gene:ENSMUSG00000038495.15 transcript:ENSMUST00000090785.9 gene_biotype:protein_coding transcript_biotype:protein_coding gene_symbol:Otud7b description:OTU domain containing 7B [Source:MGI Symbol;Acc:MGI:2654703]	1	1	1	1	840	91.9	6.86	0.903906	0.607124	1.48883	0.0124632
ENSMUSP00000109794	neuropilin 2	Nrp2	pep chromosome:GRCm39:1:62742861:62857854:1 gene:ENSMUSG00000025969.16 transcript:ENSMUST00000114157.3 gene_biotype:protein_coding transcript_biotype:protein_coding gene_symbol:Nrp2 description:neuropilin 2 [Source:MGI Symbol;Acc:MGI:1100492]	23	19	19	31	931	104.6	5.24	1.02033	0.685948	1.48747	0.0126697
ENSMUSP00000067372	IKAROS family zinc finger 1	Ikzf1	pep chromosome:GRCm39:11:11635925:11722112:1 gene:ENSMUSG00000018654.18 transcript:ENSMUST00000065433.12 gene_biotype:protein_coding transcript_biotype:protein_coding gene_symbol:Ikzf1 description:IKAROS family zinc finger 1 [Source:MGI Symbol;Acc:MGI:1342540]	6	3	3	5	535	59.4	6.52	0.840192	0.565797	1.48497	0.0130585
ENSMUSP00000009707	torsin family 2, member A	Tor2a	pep chromosome:GRCm39:2:32647246:32652256:1 gene:ENSMUSG00000009563.17 transcript:ENSMUST00000009707.14 gene_biotype:protein_coding transcript_biotype:protein_coding gene_symbol:Tor2a description:torsin family 2, member A [Source:MGI Symbol;Acc:MGI:1353596]	5	1	1	3	321	35.9	6.83	1.26112	0.849792	1.48403	0.0132072
ENSMUSP00000119330	catechol-O-methyltransferase domain containing 1	Comtd1	pep chromosome:GRCm39:14:21895923:21899045:-1 gene:ENSMUSG00000021773.12 transcript:ENSMUST00000124549.9 gene_biotype:protein_coding transcript_biotype:protein_coding gene_symbol:Comtd1 description:catechol-O-methyltransferase domain containing 1 [Source:MGI Symbol;Acc:MGI:1916406]	20	5	5	5	262	28.9	8.32	0.567466	0.382431	1.48384	0.0132381
ENSMUSP00000099907	reticulon 4	Rtn4	pep chromosome:GRCm39:11:29642947:29692916:1 gene:ENSMUSG00000020458.17 transcript:ENSMUST00000102843.10 gene_biotype:protein_coding transcript_biotype:protein_coding gene_symbol:Rtn4 description:reticulon 4 [Source:MGI Symbol;Acc:MGI:1915835]	8	2	7	29	1162	126.5	4.54	1.17623	0.792769	1.4837	0.0132598
ENSMUSP00000027940	proton activated chloride channel 1	Pacc1	pep chromosome:GRCm39:1:191058109:191083111:1 gene:ENSMUSG00000026627.8 transcript:ENSMUST00000027940.6 gene_biotype:protein_coding transcript_biotype:protein_coding gene_symbol:Pacc1 description:proton activated chloride channel 1 [Source:MGI Symbol;Acc:MGI:1914200]	5	2	2	3	350	40.2	7.77	1.28276	0.865037	1.48289	0.01339
ENSMUSP00000055714	ubiquitin-conjugating enzyme E2I	Ube2i	pep chromosome:GRCm39:17:25480890:25493284:-1 gene:ENSMUSG00000015120.16 transcript:ENSMUST00000049911.16 gene_biotype:protein_coding transcript_biotype:protein_coding gene_symbol:Ube2i description:ubiquitin-conjugating enzyme E2I [Source:MGI Symbol;Acc:MGI:107365]	32	5	5	9	158	18	8.66	0.745713	0.50407	1.47938	0.013967
ENSMUSP00000087736	actin, alpha, cardiac muscle 1	Actc1	pep chromosome:GRCm39:2:113877763:113883368:-1 gene:ENSMUSG00000068614.8 transcript:ENSMUST00000090269.7 gene_biotype:protein_coding transcript_biotype:protein_coding gene_symbol:Actc1 description:actin, alpha, cardiac muscle 1 [Source:MGI Symbol;Acc:MGI:87905]	45	5	14	215	377	42	5.39	1.56266	1.05739	1.47785	0.0142271
ENSMUSP00000099916	prostaglandin E synthase	Ptges	pep chromosome:GRCm39:2:30779483:30793309:-1 gene:ENSMUSG00000050737.14 transcript:ENSMUST00000102852.6 gene_biotype:protein_coding transcript_biotype:protein_coding gene_symbol:Ptges description:prostaglandin E synthase [Source:MGI Symbol;Acc:MGI:1927593]	5	1	1	1	153	17.3	9.39	1.07169	0.725619	1.47692	0.0143855
ENSMUSP00000091692	folate receptor 2 (fetal)	Folr2	pep chromosome:GRCm39:7:101489195:101494524:-1 gene:ENSMUSG00000032725.11 transcript:ENSMUST00000094141.7 gene_biotype:protein_coding transcript_biotype:protein_coding gene_symbol:Folr2 description:folate receptor 2 (fetal) [Source:MGI Symbol;Acc:MGI:95569]	22	6	6	8	251	28.8	7.55	0.834772	0.566067	1.47469	0.0147765
ENSMUSP00000024932	ATPase, H+ transporting, lysosomal V0 subunit C	Atp6v0c	pep chromosome:GRCm39:17:24382840:24388435:-1 gene:ENSMUSG00000024121.14 transcript:ENSMUST00000024932.12 gene_biotype:protein_coding transcript_biotype:protein_coding gene_symbol:Atp6v0c description:ATPase, H+ transporting, lysosomal V0 subunit C [Source:MGI Symbol;Acc:MGI:88116]	16	2	2	12	155	15.8	9.13	1.35089	0.916328	1.47424	0.0148553
ENSMUSP00000001485	mitochondrial ribosomal protein L10	Mrpl10	pep chromosome:GRCm39:11:96932386:96940039:1 gene:ENSMUSG00000001445.11 transcript:ENSMUST00000001485.10 gene_biotype:protein_coding transcript_biotype:protein_coding gene_symbol:Mrpl10 description:mitochondrial ribosomal protein L10 [Source:MGI Symbol;Acc:MGI:1333801]	5	1	1	1	262	29.4	9.69	0.919704	0.624215	1.47338	0.0150103
ENSMUSP00000133175	kelch-like 25	Klhl25	pep chromosome:GRCm39:7:75498058:75523879:1 gene:ENSMUSG00000055652.15 transcript:ENSMUST00000171155.4 gene_biotype:protein_coding transcript_biotype:protein_coding gene_symbol:Klhl25 description:kelch-like 25 [Source:MGI Symbol;Acc:MGI:2668031]	3	2	2	2	589	65.8	6.71	1.01323	0.687896	1.47295	0.0150875
ENSMUSP00000026613	glucuronidase, beta	Gusb	pep chromosome:GRCm39:5:130017852:130031890:-1 gene:ENSMUSG00000025534.18 transcript:ENSMUST00000026613.14 gene_biotype:protein_coding transcript_biotype:protein_coding gene_symbol:Gusb description:glucuronidase, beta [Source:MGI Symbol;Acc:MGI:95872]	33	19	19	85	648	74.1	6.7	1.24006	0.841927	1.47288	0.0150987
ENSMUSP00000038106	solute carrier family 12 (potassium/chloride transporters), member 9	Slc12a9	pep chromosome:GRCm39:5:137312820:137331859:-1 gene:ENSMUSG00000037344.15 transcript:ENSMUST00000039991.14 gene_biotype:protein_coding transcript_biotype:protein_coding gene_symbol:Slc12a9 description:solute carrier family 12 (potassium/chloride transporters), member 9 [Source:MGI Symbol;Acc:MGI:1933532]	6	5	5	5	914	96.3	7.02	0.924017	0.627892	1.47162	0.0153293
ENSMUSP00000112675	protein tyrosine phosphatase, non-receptor type 2	Ptpn2	pep chromosome:GRCm39:18:67804282:67857665:-1 gene:ENSMUSG00000024539.18 transcript:ENSMUST00000122412.2 gene_biotype:protein_coding transcript_biotype:protein_coding gene_symbol:Ptpn2 description:protein tyrosine phosphatase, non-receptor type 2 [Source:MGI Symbol;Acc:MGI:97806]	5	2	2	2	406	47.3	8.37	1.0374	0.705071	1.47134	0.0153808
ENSMUSP00000033900	RAB20, member RAS oncogene family	Rab20	pep chromosome:GRCm39:8:11503518:11528710:-1 gene:ENSMUSG00000031504.7 transcript:ENSMUST00000033900.7 gene_biotype:protein_coding transcript_biotype:protein_coding gene_symbol:Rab20 description:RAB20, member RAS oncogene family [Source:MGI Symbol;Acc:MGI:102789]	15	3	3	3	233	26	5.77	0.879843	0.59841	1.4703	0.0155719
ENSMUSP00000080998	mitochondrially encoded NADH dehydrogenase 3	mt-Nd3	pep chromosome:GRCm39:MT:9459:9806:1 gene:ENSMUSG00000064360.1 transcript:ENSMUST00000082411.1 gene_biotype:protein_coding transcript_biotype:protein_coding gene_symbol:mt-Nd3 description:mitochondrially encoded NADH dehydrogenase 3 [Source:MGI Symbol;Acc:MGI:102499]	13	1	1	1	115	13.2	4.64	1.0102	0.688501	1.46724	0.0161506
ENSMUSP00000116259	serine/arginine-rich protein specific kinase 1	Srpk1	pep chromosome:GRCm39:17:28806622:28841683:-1 gene:ENSMUSG00000004865.17 transcript:ENSMUST00000130643.9 gene_biotype:protein_coding transcript_biotype:protein_coding gene_symbol:Srpk1 description:serine/arginine-rich protein specific kinase 1 [Source:MGI Symbol;Acc:MGI:106908]	3	1	2	2	648	73	6.19	0.890412	0.607538	1.46561	0.0164675
ENSMUSP00000026972	FAM20C, golgi associated secretory pathway kinase	Fam20c	pep chromosome:GRCm39:5:138740269:138795832:1 gene:ENSMUSG00000025854.16 transcript:ENSMUST00000026972.8 gene_biotype:protein_coding transcript_biotype:protein_coding gene_symbol:Fam20c description:FAM20C, golgi associated secretory pathway kinase [Source:MGI Symbol;Acc:MGI:2136853]	16	7	7	10	579	65.7	7.47	1.10111	0.752237	1.46378	0.0168299
ENSMUSP00000102393	prolyl-tRNA synthetase (mitochondrial)(putative)	Pars2	pep chromosome:GRCm39:4:106508295:106512477:1 gene:ENSMUSG00000043572.8 transcript:ENSMUST00000106781.2 gene_biotype:protein_coding transcript_biotype:protein_coding gene_symbol:Pars2 description:prolyl-tRNA synthetase (mitochondrial)(putative) [Source:MGI Symbol;Acc:MGI:2386296]	7	3	3	3	511	57.7	8.21	1.08672	0.743585	1.46145	0.0172998
ENSMUSP00000019803	coiled-coil domain containing 12	Ccdc12	pep chromosome:GRCm39:9:110485571:110540674:1 gene:ENSMUSG00000019659.9 transcript:ENSMUST00000019803.9 gene_biotype:protein_coding transcript_biotype:protein_coding gene_symbol:Ccdc12 description:coiled-coil domain containing 12 [Source:MGI Symbol;Acc:MGI:1919904]	4	1	1	1	166	18.9	7.21	1.17619	0.804863	1.46136	0.0173194
ENSMUSP00000122424	interferon activated gene 203	Ifi203	pep chromosome:GRCm39:1:173749786:173770057:-1 gene:ENSMUSG00000039997.17 transcript:ENSMUST00000129829.8 gene_biotype:protein_coding transcript_biotype:protein_coding gene_symbol:Ifi203 description:interferon activated gene 203 [Source:MGI Symbol;Acc:MGI:96428]	3	2	2	3	871	95.2	9.77	0.634451	0.434564	1.45997	0.0176063
ENSMUSP00000022419	peptidylprolyl isomerase F (cyclophilin F)	Ppif	pep chromosome:GRCm39:14:25694594:25700892:1 gene:ENSMUSG00000021868.8 transcript:ENSMUST00000022419.7 gene_biotype:protein_coding transcript_biotype:protein_coding gene_symbol:Ppif description:peptidylprolyl isomerase F (cyclophilin F) [Source:MGI Symbol;Acc:MGI:2145814]	19	3	5	6	206	21.7	9.16	1.01745	0.697328	1.45907	0.017796
ENSMUSP00000158905	tyrosine kinase, non-receptor, 2	Tnk2	pep chromosome:GRCm39:16:32480070:32502311:1 gene:ENSMUSG00000022791.20 transcript:ENSMUST00000238856.2 gene_biotype:protein_coding transcript_biotype:protein_coding gene_symbol:Tnk2 description:tyrosine kinase, non-receptor, 2 [Source:MGI Symbol;Acc:MGI:1858308]	1	1	1	1	1072	118.8	7.85	0.882808	0.605124	1.45889	0.0178336
ENSMUSP00000027989	hydroxysteroid (17-beta) dehydrogenase 7	Hsd17b7	pep chromosome:GRCm39:1:169777104:169796810:-1 gene:ENSMUSG00000026675.13 transcript:ENSMUST00000027989.13 gene_biotype:protein_coding transcript_biotype:protein_coding gene_symbol:Hsd17b7 description:hydroxysteroid (17-beta) dehydrogenase 7 [Source:MGI Symbol;Acc:MGI:1330808]	6	2	2	2	334	37.3	6.73	1.16587	0.799181	1.45884	0.0178445
ENSMUSP00000130759	TNF receptor-associated factor 1	Traf1	pep chromosome:GRCm39:2:34831762:34848175:-1 gene:ENSMUSG00000026875.15 transcript:ENSMUST00000172159.8 gene_biotype:protein_coding transcript_biotype:protein_coding gene_symbol:Traf1 description:TNF receptor-associated factor 1 [Source:MGI Symbol;Acc:MGI:101836]	2	1	1	1	409	45.4	5.78	0.784576	0.537863	1.45869	0.0178754
ENSMUSP00000021719	ATP synthase membrane subunit 6.8PL	Atp5mpl	pep chromosome:GRCm39:12:111927809:111933411:-1 gene:ENSMUSG00000021290.7 transcript:ENSMUST00000021719.7 gene_biotype:protein_coding transcript_biotype:protein_coding gene_symbol:Atp5mpl description:ATP synthase membrane subunit 6.8PL [Source:MGI Symbol;Acc:MGI:1917507]	29	1	2	4	58	6.7	9.99	1.1073	0.760164	1.45666	0.0183103
ENSMUSP00000082777	feline leukemia virus subgroup C cellular receptor 1	Flvcr1	pep chromosome:GRCm39:1:190738044:190758355:-1 gene:ENSMUSG00000066595.10 transcript:ENSMUST00000085635.6 gene_biotype:protein_coding transcript_biotype:protein_coding gene_symbol:Flvcr1 description:feline leukemia virus subgroup C cellular receptor 1 [Source:MGI Symbol;Acc:MGI:2444881]	6	3	3	3	560	60.4	5.68	1.26089	0.86599	1.45601	0.0184499
ENSMUSP00000005173	N-sulfoglucosamine sulfohydrolase (sulfamidase)	Sgsh	pep chromosome:GRCm39:11:119234308:119246362:-1 gene:ENSMUSG00000005043.14 transcript:ENSMUST00000005173.11 gene_biotype:protein_coding transcript_biotype:protein_coding gene_symbol:Sgsh description:N-sulfoglucosamine sulfohydrolase (sulfamidase) [Source:MGI Symbol;Acc:MGI:1350341]	9	4	4	7	502	56.7	6.37	0.959138	0.659475	1.4544	0.0188053
ENSMUSP00000126186	muscleblind like splicing factor 2	Mbnl2	pep chromosome:GRCm39:14:120513133:120669107:1 gene:ENSMUSG00000022139.18 transcript:ENSMUST00000167459.3 gene_biotype:protein_coding transcript_biotype:protein_coding gene_symbol:Mbnl2 description:muscleblind like splicing factor 2 [Source:MGI Symbol;Acc:MGI:2145597]	7	1	3	4	385	41.3	8.92	1.2754	0.877184	1.45397	0.0188989
ENSMUSP00000025779	CDK2-associated protein 2	Cdk2ap2	pep chromosome:GRCm39:19:4147182:4149017:1 gene:ENSMUSG00000024856.11 transcript:ENSMUST00000025779.11 gene_biotype:protein_coding transcript_biotype:protein_coding gene_symbol:Cdk2ap2 description:CDK2-associated protein 2 [Source:MGI Symbol;Acc:MGI:1098779]	6	1	1	1	127	13.2	9.48	0.248084	0.170687	1.45344	0.0190174
ENSMUSP00000020543	cytoplasmic polyadenylation element binding protein 4	Cpeb4	pep chromosome:GRCm39:11:31822211:31881577:1 gene:ENSMUSG00000020300.15 transcript:ENSMUST00000020543.13 gene_biotype:protein_coding transcript_biotype:protein_coding gene_symbol:Cpeb4 description:cytoplasmic polyadenylation element binding protein 4 [Source:MGI Symbol;Acc:MGI:1914829]	4	2	2	2	729	80.1	7.18	1.36995	0.942678	1.45326	0.0190591
ENSMUSP00000025444	CXXC finger 1 (PHD domain)	Cxxc1	pep chromosome:GRCm39:18:74349202:74354564:1 gene:ENSMUSG00000024560.8 transcript:ENSMUST00000025444.8 gene_biotype:protein_coding transcript_biotype:protein_coding gene_symbol:Cxxc1 description:CXXC finger 1 (PHD domain) [Source:MGI Symbol;Acc:MGI:1921572]	5	3	3	3	660	76.1	8.27	0.624307	0.429875	1.4523	0.0192758
ENSMUSP00000066808	strawberry notch 1	Sbno1	pep chromosome:GRCm39:5:124506765:124563977:-1 gene:ENSMUSG00000038095.16 transcript:ENSMUST00000065263.12 gene_biotype:protein_coding transcript_biotype:protein_coding gene_symbol:Sbno1 description:strawberry notch 1 [Source:MGI Symbol;Acc:MGI:2384298]	2	1	2	2	1391	153.8	8.07	0.597847	0.411692	1.45217	0.019305
ENSMUSP00000022176	3-hydroxy-3-methylglutaryl-Coenzyme A reductase	Hmgcr	pep chromosome:GRCm39:13:96785475:96807444:-1 gene:ENSMUSG00000021670.15 transcript:ENSMUST00000022176.15 gene_biotype:protein_coding transcript_biotype:protein_coding gene_symbol:Hmgcr description:3-hydroxy-3-methylglutaryl-Coenzyme A reductase [Source:MGI Symbol;Acc:MGI:96159]	6	4	4	5	887	97	6.7	0.98527	0.678503	1.45212	0.0193152
ENSMUSP00000149365	anoctamin 8	Ano8	pep chromosome:GRCm39:8:71928663:71938607:-1 gene:ENSMUSG00000034863.10 transcript:ENSMUST00000213382.2 gene_biotype:protein_coding transcript_biotype:protein_coding gene_symbol:Ano8 description:anoctamin 8 [Source:MGI Symbol;Acc:MGI:2687327]	1	1	1	1	1104	123.9	6.01	0.944891	0.652074	1.44905	0.0200246
ENSMUSP00000028259	interferon induced with helicase C domain 1	Ifih1	pep chromosome:GRCm39:2:62426142:62476555:-1 gene:ENSMUSG00000026896.15 transcript:ENSMUST00000028259.12 gene_biotype:protein_coding transcript_biotype:protein_coding gene_symbol:Ifih1 description:interferon induced with helicase C domain 1 [Source:MGI Symbol;Acc:MGI:1918836]	14	18	18	21	1025	115.9	6.25	0.856193	0.591328	1.44792	0.0202939
ENSMUSP00000044877	Bet1 golgi vesicular membrane trafficking protein	Bet1	pep chromosome:GRCm39:6:4076899:4086972:-1 gene:ENSMUSG00000032757.7 transcript:ENSMUST00000049166.5 gene_biotype:protein_coding transcript_biotype:protein_coding gene_symbol:Bet1 description:Bet1 golgi vesicular membrane trafficking protein [Source:MGI Symbol;Acc:MGI:1343104]	9	1	1	1	118	13.3	9.07	1.16516	0.80523	1.447	0.0205142
ENSMUSP00000138982	M-phase phosphoprotein 9	Mphosph9	pep chromosome:GRCm39:5:124391731:124465915:-1 gene:ENSMUSG00000038126.18 transcript:ENSMUST00000184951.8 gene_biotype:protein_coding transcript_biotype:protein_coding gene_symbol:Mphosph9 description:M-phase phosphoprotein 9 [Source:MGI Symbol;Acc:MGI:2443138]	1	1	1	1	1144	126.9	6.57	0.487195	0.336789	1.44659	0.0206119
ENSMUSP00000001583	elongation factor for RNA polymerase II 2	Ell2	pep chromosome:GRCm39:13:75854876:75920483:1 gene:ENSMUSG00000001542.8 transcript:ENSMUST00000001583.8 gene_biotype:protein_coding transcript_biotype:protein_coding gene_symbol:Ell2 description:elongation factor for RNA polymerase II 2 [Source:MGI Symbol;Acc:MGI:2183438]	4	3	3	3	639	72.1	8.81	1.05604	0.730037	1.44656	0.0206189
ENSMUSP00000030583	adenylate kinase 2	Ak2	pep chromosome:GRCm39:4:128887017:128902194:1 gene:ENSMUSG00000028792.15 transcript:ENSMUST00000030583.13 gene_biotype:protein_coding transcript_biotype:protein_coding gene_symbol:Ak2 description:adenylate kinase 2 [Source:MGI Symbol;Acc:MGI:87978]	45	9	9	30	239	26.5	7.39	1.3272	0.918222	1.44541	0.0208994
ENSMUSP00000039604	mitochondrial ubiquitin ligase activator of NFKB 1	Mul1	pep chromosome:GRCm39:4:138161982:138169576:1 gene:ENSMUSG00000041241.13 transcript:ENSMUST00000044058.11 gene_biotype:protein_coding transcript_biotype:protein_coding gene_symbol:Mul1 description:mitochondrial ubiquitin ligase activator of NFKB 1 [Source:MGI Symbol;Acc:MGI:1915600]	3	1	1	1	352	39.8	7.96	1.24947	0.865353	1.44388	0.0212752
ENSMUSP00000010421	RIKEN cDNA 2610507B11 gene	2610507B11Rik	pep chromosome:GRCm39:11:78152578:78181449:1 gene:ENSMUSG00000010277.8 transcript:ENSMUST00000010421.7 gene_biotype:protein_coding transcript_biotype:protein_coding gene_symbol:2610507B11Rik description:RIKEN cDNA 2610507B11 gene [Source:MGI Symbol;Acc:MGI:1919753]	0	1	1	1	2234	254.3	7.34	0.906302	0.627977	1.44321	0.0214433
ENSMUSP00000035562	schlafen 2	Slfn2	pep chromosome:GRCm39:11:82955938:82961504:1 gene:ENSMUSG00000072620.4 transcript:ENSMUST00000038038.8 gene_biotype:protein_coding transcript_biotype:protein_coding gene_symbol:Slfn2 description:schlafen 2 [Source:MGI Symbol;Acc:MGI:1313258]	9	3	3	5	378	42.4	6.38	1.05281	0.729492	1.44321	0.0214433
ENSMUSP00000001304	creatine kinase, brain	Ckb	pep chromosome:GRCm39:12:111635795:111638772:-1 gene:ENSMUSG00000001270.10 transcript:ENSMUST00000001304.9 gene_biotype:protein_coding transcript_biotype:protein_coding gene_symbol:Ckb description:creatine kinase, brain [Source:MGI Symbol;Acc:MGI:88407]	37	11	11	46	381	42.7	5.67	1.17703	0.816167	1.44214	0.021713
ENSMUSP00000120466	plasminogen receptor, C-terminal lysine transmembrane protein	Plgrkt	pep chromosome:GRCm39:19:29325999:29339370:-1 gene:ENSMUSG00000016495.13 transcript:ENSMUST00000143467.8 gene_biotype:protein_coding transcript_biotype:protein_coding gene_symbol:Plgrkt description:plasminogen receptor, C-terminal lysine transmembrane protein [Source:MGI Symbol;Acc:MGI:1915009]	33	6	6	9	147	17.3	9.5	1.40823	0.976982	1.44141	0.0218996
ENSMUSP00000027015	caspase 1	Casp1	pep chromosome:GRCm39:9:5298508:5307290:1 gene:ENSMUSG00000025888.7 transcript:ENSMUST00000027015.7 gene_biotype:protein_coding transcript_biotype:protein_coding gene_symbol:Casp1 description:caspase 1 [Source:MGI Symbol;Acc:MGI:96544]	23	10	10	14	402	45.6	6.04	0.499716	0.346855	1.44071	0.0220793
ENSMUSP00000147997	RasGEF domain family, member 1B	Rasgef1b	pep chromosome:GRCm39:5:99365285:99876671:-1 gene:ENSMUSG00000089809.10 transcript:ENSMUST00000209346.2 gene_biotype:protein_coding transcript_biotype:protein_coding gene_symbol:Rasgef1b description:RasGEF domain family, member 1B [Source:MGI Symbol;Acc:MGI:2443755]	11	7	7	7	559	64.3	8.37	0.827532	0.574503	1.44043	0.0221501
ENSMUSP00000140950	RIKEN cDNA 1700025G04 gene	1700025G04Rik	pep chromosome:GRCm39:1:151728154:151965721:-1 gene:ENSMUSG00000032666.17 transcript:ENSMUST00000187603.7 gene_biotype:protein_coding transcript_biotype:nonsense_mediated_decay gene_symbol:1700025G04Rik description:RIKEN cDNA 1700025G04 gene [Source:MGI Symbol;Acc:MGI:1916649]	8	1	1	1	121	13.9	5.22	0.614833	0.426928	1.44013	0.0222273
ENSMUSP00000133360	steroid receptor RNA activator 1	Sra1	pep chromosome:GRCm39:18:36799734:36803868:-1 gene:ENSMUSG00000006050.13 transcript:ENSMUST00000173875.9 gene_biotype:protein_coding transcript_biotype:protein_coding gene_symbol:Sra1 description:steroid receptor RNA activator 1 [Source:MGI Symbol;Acc:MGI:1344414]	3	1	1	1	232	25.5	6.43	0.762136	0.529267	1.43998	0.0222658
ENSMUSP00000053394	sphingosine-1-phosphate receptor 2	S1pr2	pep chromosome:GRCm39:9:20873657:20888077:-1 gene:ENSMUSG00000043895.7 transcript:ENSMUST00000054197.7 gene_biotype:protein_coding transcript_biotype:protein_coding gene_symbol:S1pr2 description:sphingosine-1-phosphate receptor 2 [Source:MGI Symbol;Acc:MGI:99569]	3	1	1	1	352	38.8	9.25	1.36586	0.948796	1.43958	0.0223715
ENSMUSP00000130684	zinc finger, FYVE domain containing 27	Zfyve27	pep chromosome:GRCm39:19:42159006:42183029:1 gene:ENSMUSG00000018820.14 transcript:ENSMUST00000169536.8 gene_biotype:protein_coding transcript_biotype:protein_coding gene_symbol:Zfyve27 description:zinc finger, FYVE domain containing 27 [Source:MGI Symbol;Acc:MGI:1919602]	2	1	1	1	415	46.2	5.35	1.01886	0.708987	1.43707	0.0230351
ENSMUSP00000030360	leucine rich repeat containing 42	Lrrc42	pep chromosome:GRCm39:4:107090711:107110729:-1 gene:ENSMUSG00000028617.11 transcript:ENSMUST00000030360.11 gene_biotype:protein_coding transcript_biotype:protein_coding gene_symbol:Lrrc42 description:leucine rich repeat containing 42 [Source:MGI Symbol;Acc:MGI:1925059]	4	1	1	1	421	47.9	7.4	1.073	0.747407	1.43563	0.0234234
ENSMUSP00000071486	actin, gamma, cytoplasmic 1	Actg1	pep chromosome:GRCm39:11:120236516:120239368:-1 gene:ENSMUSG00000062825.16 transcript:ENSMUST00000071555.13 gene_biotype:protein_coding transcript_biotype:protein_coding gene_symbol:Actg1 description:actin, gamma, cytoplasmic 1 [Source:MGI Symbol;Acc:MGI:87906]	66	8	18	289	375	41.8	5.48	1.26304	0.880367	1.43468	0.0236829
ENSMUSP00000158305	annexin A1	Anxa1	pep chromosome:GRCm39:19:20350792:20368037:-1 gene:ENSMUSG00000024659.16 transcript:ENSMUST00000235280.2 gene_biotype:protein_coding transcript_biotype:protein_coding gene_symbol:Anxa1 description:annexin A1 [Source:MGI Symbol;Acc:MGI:96819]	58	18	19	65	346	38.7	7.37	1.2617	0.880411	1.43309	0.0241238
ENSMUSP00000088676	ubiquitin related modifier 1	Urm1	pep chromosome:GRCm39:2:29717354:29735014:1 gene:ENSMUSG00000069020.10 transcript:ENSMUST00000091142.4 gene_biotype:protein_coding transcript_biotype:protein_coding gene_symbol:Urm1 description:ubiquitin related modifier 1 [Source:MGI Symbol;Acc:MGI:1915455]	15	1	1	1	101	11.3	4.74	0.994555	0.694743	1.43154	0.0245582
ENSMUSP00000104825	interferon gamma inducible protein 47	Ifi47	pep chromosome:GRCm39:11:48967414:48987801:1 gene:ENSMUSG00000078920.4 transcript:ENSMUST00000109202.3 gene_biotype:protein_coding transcript_biotype:protein_coding gene_symbol:Ifi47 description:interferon gamma inducible protein 47 [Source:MGI Symbol;Acc:MGI:99448]	30	10	12	16	420	46.8	6.74	0.753564	0.526612	1.43097	0.0247225
ENSMUSP00000159120	regulator of G-protein signaling like 1	Rgsl1	pep chromosome:GRCm39:1:153655132:153719888:-1 gene:ENSMUSG00000042641.20 transcript:ENSMUST00000238926.2 gene_biotype:protein_coding transcript_biotype:protein_coding gene_symbol:Rgsl1 description:regulator of G-protein signaling like 1 [Source:MGI Symbol;Acc:MGI:2685048]	1	1	1	1	1108	129.1	9.28	1.12299	0.785099	1.43038	0.0248901
ENSMUSP00000080974	CD36 molecule	Cd36	pep chromosome:GRCm39:5:17987014:18040694:-1 gene:ENSMUSG00000002944.16 transcript:ENSMUST00000082367.13 gene_biotype:protein_coding transcript_biotype:protein_coding gene_symbol:Cd36 description:CD36 molecule [Source:MGI Symbol;Acc:MGI:107899]	22	10	10	19	472	52.7	8.35	1.29272	0.904114	1.42982	0.0250536
ENSMUSP00000112685	solute carrier family 29 (nucleoside transporters), member 3	Slc29a3	pep chromosome:GRCm39:10:60547851:60588561:-1 gene:ENSMUSG00000020100.16 transcript:ENSMUST00000117513.8 gene_biotype:protein_coding transcript_biotype:protein_coding gene_symbol:Slc29a3 description:solute carrier family 29 (nucleoside transporters), member 3 [Source:MGI Symbol;Acc:MGI:1918529]	15	5	5	11	475	51.7	7.61	1.19578	0.837373	1.42802	0.0255789
ENSMUSP00000154304	novel protein	AC140267.1	pep chromosome:GRCm39:15:80120036:80120248:1 gene:ENSMUSG00000115798.2 transcript:ENSMUST00000226485.2 gene_biotype:protein_coding transcript_biotype:protein_coding gene_symbol:AC140267.1 description:novel protein	11	1	1	1	70	8.4	9.99	1.19959	0.840579	1.4271	0.0258521
ENSMUSP00000041503	ADP-ribosylation factor-like 6 interacting protein 5	Arl6ip5	pep chromosome:GRCm39:6:97187650:97210276:1 gene:ENSMUSG00000035199.7 transcript:ENSMUST00000044681.7 gene_biotype:protein_coding transcript_biotype:protein_coding gene_symbol:Arl6ip5 description:ADP-ribosylation factor-like 6 interacting protein 5 [Source:MGI Symbol;Acc:MGI:1929501]	13	3	3	5	188	21.5	9.61	1.12403	0.78852	1.4255	0.0263338
ENSMUSP00000138885	phosphatidylinositol glycan anchor biosynthesis, class B	Pigb	pep chromosome:GRCm39:9:72914701:72947660:-1 gene:ENSMUSG00000079469.11 transcript:ENSMUST00000183746.8 gene_biotype:protein_coding transcript_biotype:nonsense_mediated_decay gene_symbol:Pigb description:phosphatidylinositol glycan anchor biosynthesis, class B [Source:MGI Symbol;Acc:MGI:1891825]	2	1	1	1	542	63.1	9.23	1.07461	0.753909	1.42539	0.0263662
ENSMUSP00000121848	C-type lectin domain family 5, member a	Clec5a	pep chromosome:GRCm39:6:40554784:40562729:-1 gene:ENSMUSG00000029915.15 transcript:ENSMUST00000129948.9 gene_biotype:protein_coding transcript_biotype:protein_coding gene_symbol:Clec5a description:C-type lectin domain family 5, member a [Source:MGI Symbol;Acc:MGI:1345151]	30	5	5	7	190	21.7	6.52	1.06871	0.749788	1.42535	0.0263771
ENSMUSP00000037000	microcephaly, primary autosomal recessive 1	Mcph1	pep chromosome:GRCm39:8:18645147:18853205:1 gene:ENSMUSG00000039842.16 transcript:ENSMUST00000039412.15 gene_biotype:protein_coding transcript_biotype:protein_coding gene_symbol:Mcph1 description:microcephaly, primary autosomal recessive 1 [Source:MGI Symbol;Acc:MGI:2443308]	1	1	1	1	822	90.3	7.93	1.26505	0.887778	1.42496	0.0264977
ENSMUSP00000159356	coiled coil domain containing 88A	Ccdc88a	pep chromosome:GRCm39:11:29324348:29454805:1 gene:ENSMUSG00000032740.18 transcript:ENSMUST00000239407.2 gene_biotype:protein_coding transcript_biotype:protein_coding gene_symbol:Ccdc88a description:coiled coil domain containing 88A [Source:MGI Symbol;Acc:MGI:1925177]	6	12	12	13	2016	231.5	5.94	0.86041	0.603873	1.42482	0.0265393
ENSMUSP00000034713	low density lipoprotein receptor	Ldlr	pep chromosome:GRCm39:9:21634779:21661215:1 gene:ENSMUSG00000032193.10 transcript:ENSMUST00000034713.9 gene_biotype:protein_coding transcript_biotype:protein_coding gene_symbol:Ldlr description:low density lipoprotein receptor [Source:MGI Symbol;Acc:MGI:96765]	3	3	3	4	862	94.9	5.02	1.05943	0.74398	1.42401	0.0267882
ENSMUSP00000064536	gap junction protein, alpha 1	Gja1	pep chromosome:GRCm39:10:56253426:56266511:1 gene:ENSMUSG00000050953.11 transcript:ENSMUST00000068581.9 gene_biotype:protein_coding transcript_biotype:protein_coding gene_symbol:Gja1 description:gap junction protein, alpha 1 [Source:MGI Symbol;Acc:MGI:95713]	4	2	2	2	382	43	8.76	0.893661	0.62785	1.42337	0.0269861
ENSMUSP00000063390	interferon inducible GTPase 1	Iigp1	pep chromosome:GRCm39:18:60509119:60525706:1 gene:ENSMUSG00000054072.13 transcript:ENSMUST00000066912.13 gene_biotype:protein_coding transcript_biotype:protein_coding gene_symbol:Iigp1 description:interferon inducible GTPase 1 [Source:MGI Symbol;Acc:MGI:1926259]	7	2	2	3	413	47.5	6.33	0.618144	0.434569	1.42243	0.0272781
ENSMUSP00000127646	arylsulfatase A	Arsa	pep chromosome:GRCm39:15:89356679:89361628:-1 gene:ENSMUSG00000022620.15 transcript:ENSMUST00000165199.8 gene_biotype:protein_coding transcript_biotype:protein_coding gene_symbol:Arsa description:arylsulfatase A [Source:MGI Symbol;Acc:MGI:88077]	8	3	4	11	506	53.7	5.87	1.11544	0.785292	1.42041	0.0279161
ENSMUSP00000043088	diacylglycerol lipase, beta	Daglb	pep chromosome:GRCm39:5:143450339:143491697:1 gene:ENSMUSG00000039206.14 transcript:ENSMUST00000045593.12 gene_biotype:protein_coding transcript_biotype:protein_coding gene_symbol:Daglb description:diacylglycerol lipase, beta [Source:MGI Symbol;Acc:MGI:2442032]	20	14	14	25	669	73.9	6.73	1.30573	0.919715	1.41971	0.0281413
ENSMUSP00000020964	FK506 binding protein 1b	Fkbp1b	pep chromosome:GRCm39:12:4883174:4891591:-1 gene:ENSMUSG00000020635.9 transcript:ENSMUST00000020964.7 gene_biotype:protein_coding transcript_biotype:protein_coding gene_symbol:Fkbp1b description:FK506 binding protein 1b [Source:MGI Symbol;Acc:MGI:1336205]	25	2	2	2	108	11.8	8.47	0.954483	0.672379	1.41956	0.0281906
ENSMUSP00000054637	interleukin 27	Il27	pep chromosome:GRCm39:7:126188182:126194113:-1 gene:ENSMUSG00000044701.6 transcript:ENSMUST00000058429.6 gene_biotype:protein_coding transcript_biotype:protein_coding gene_symbol:Il27 description:interleukin 27 [Source:MGI Symbol;Acc:MGI:2384409]	4	1	1	2	234	26.5	5.6	0.848718	0.598145	1.41892	0.0283996
ENSMUSP00000050788	phosphorylase kinase beta	Phkb	pep chromosome:GRCm39:8:86567631:86788005:1 gene:ENSMUSG00000036879.16 transcript:ENSMUST00000053771.14 gene_biotype:protein_coding transcript_biotype:protein_coding gene_symbol:Phkb description:phosphorylase kinase beta [Source:MGI Symbol;Acc:MGI:97578]	2	3	3	3	1085	123.8	6.83	1.04122	0.734225	1.41813	0.0286575
ENSMUSP00000112905	predicted gene 20489	Gm20489	pep chromosome:GRCm39:X:100305011:100312629:-1 gene:ENSMUSG00000092463.2 transcript:ENSMUST00000117736.2 gene_biotype:protein_coding transcript_biotype:protein_coding gene_symbol:Gm20489 description:predicted gene 20489 [Source:MGI Symbol;Acc:MGI:5141954]	2	1	1	1	449	51.9	9.17	1.00012	0.705557	1.41749	0.0288672
ENSMUSP00000124258	poly (ADP-ribose) polymerase family, member 4	Parp4	pep chromosome:GRCm39:14:56813076:56897251:1 gene:ENSMUSG00000054509.8 transcript:ENSMUST00000161553.2 gene_biotype:protein_coding transcript_biotype:protein_coding gene_symbol:Parp4 description:poly (ADP-ribose) polymerase family, member 4 [Source:MGI Symbol;Acc:MGI:2685589]	3	6	6	6	1969	216	6.07	0.87693	0.619	1.41669	0.0291324
ENSMUSP00000096185	succinate dehydrogenase complex assembly factor 1	Sdhaf1	pep chromosome:GRCm39:7:30020831:30023320:-1 gene:ENSMUSG00000074211.5 transcript:ENSMUST00000098586.5 gene_biotype:protein_coding transcript_biotype:protein_coding gene_symbol:Sdhaf1 description:succinate dehydrogenase complex assembly factor 1 [Source:MGI Symbol;Acc:MGI:1915582]	13	1	1	1	118	13.1	11.24	0.956301	0.675785	1.4151	0.0296664
ENSMUSP00000036304	LIM domain containing preferred translocation partner in lipoma	Lpp	pep chromosome:GRCm39:16:24212290:24811328:1 gene:ENSMUSG00000033306.16 transcript:ENSMUST00000038053.14 gene_biotype:protein_coding transcript_biotype:protein_coding gene_symbol:Lpp description:LIM domain containing preferred translocation partner in lipoma [Source:MGI Symbol;Acc:MGI:2441849]	1	1	1	2	613	65.8	7.37	1.19964	0.847886	1.41486	0.0297454
ENSMUSP00000080993	mitochondrially encoded cytochrome c oxidase I	mt-Co1	pep chromosome:GRCm39:MT:5328:6872:1 gene:ENSMUSG00000064351.1 transcript:ENSMUST00000082402.1 gene_biotype:protein_coding transcript_biotype:protein_coding gene_symbol:mt-Co1 description:mitochondrially encoded cytochrome c oxidase I [Source:MGI Symbol;Acc:MGI:102504]	2	1	1	1	514	56.9	6.7	1.20347	0.850604	1.41484	0.0297541
ENSMUSP00000064330	pantothenate kinase 4	Pank4	pep chromosome:GRCm39:4:155048590:155065395:1 gene:ENSMUSG00000029056.14 transcript:ENSMUST00000070953.11 gene_biotype:protein_coding transcript_biotype:protein_coding gene_symbol:Pank4 description:pantothenate kinase 4 [Source:MGI Symbol;Acc:MGI:2387466]	1	1	1	1	820	91.5	6.71	1.05636	0.746886	1.41435	0.0299195
ENSMUSP00000119057	euchromatic histone methyltransferase 1	Ehmt1	pep chromosome:GRCm39:2:24679940:24809626:-1 gene:ENSMUSG00000036893.18 transcript:ENSMUST00000147147.8 gene_biotype:protein_coding transcript_biotype:protein_coding gene_symbol:Ehmt1 description:euchromatic histone methyltransferase 1 [Source:MGI Symbol;Acc:MGI:1924933]	2	1	2	2	1296	141.9	5.8	1.20858	0.854707	1.41402	0.0300312
ENSMUSP00000101734	adhesion G protein-coupled receptor L2	Adgrl2	pep chromosome:GRCm39:3:148521222:148660271:-1 gene:ENSMUSG00000028184.13 transcript:ENSMUST00000106128.7 gene_biotype:protein_coding transcript_biotype:protein_coding gene_symbol:Adgrl2 description:adhesion G protein-coupled receptor L2 [Source:MGI Symbol;Acc:MGI:2139714]	1	2	2	2	1487	166.5	6.71	1.0164	0.71911	1.41341	0.0302426
ENSMUSP00000157737	adaptor-related protein complex 5, beta 1 subunit	Ap5b1	pep chromosome:GRCm39:19:5618053:5621289:1 gene:ENSMUSG00000049562.7 transcript:ENSMUST00000235575.2 gene_biotype:protein_coding transcript_biotype:protein_coding gene_symbol:Ap5b1 description:adaptor-related protein complex 5, beta 1 subunit [Source:MGI Symbol;Acc:MGI:2685808]	8	5	5	5	876	94.6	6.07	1.02868	0.729287	1.41053	0.031249
ENSMUSP00000143429	crystallin beta-gamma domain containing 1	Crybg1	pep chromosome:GRCm39:10:43826632:44024849:-1 gene:ENSMUSG00000019866.16 transcript:ENSMUST00000200401.2 gene_biotype:protein_coding transcript_biotype:protein_coding gene_symbol:Crybg1 description:crystallin beta-gamma domain containing 1 [Source:MGI Symbol;Acc:MGI:109544]	2	2	2	3	2065	223.3	5.72	0.988648	0.700952	1.41044	0.0312826
ENSMUSP00000109211	monoglyceride lipase	Mgll	pep chromosome:GRCm39:6:88701476:88802972:1 gene:ENSMUSG00000033174.18 transcript:ENSMUST00000113581.8 gene_biotype:protein_coding transcript_biotype:protein_coding gene_symbol:Mgll description:monoglyceride lipase [Source:MGI Symbol;Acc:MGI:1346042]	24	6	6	13	331	36.6	7.21	1.31361	0.931991	1.40947	0.0316292
ENSMUSP00000035065	prostaglandin-endoperoxide synthase 2	Ptgs2	pep chromosome:GRCm39:1:149975782:149983978:1 gene:ENSMUSG00000032487.9 transcript:ENSMUST00000035065.9 gene_biotype:protein_coding transcript_biotype:protein_coding gene_symbol:Ptgs2 description:prostaglandin-endoperoxide synthase 2 [Source:MGI Symbol;Acc:MGI:97798]	17	7	8	15	604	69	7.37	0.904573	0.641885	1.40924	0.0317083
ENSMUSP00000022124	CD180 antigen	Cd180	pep chromosome:GRCm39:13:102830066:102843463:1 gene:ENSMUSG00000021624.10 transcript:ENSMUST00000022124.10 gene_biotype:protein_coding transcript_biotype:protein_coding gene_symbol:Cd180 description:CD180 antigen [Source:MGI Symbol;Acc:MGI:1194924]	18	9	9	21	661	74.3	5.88	1.11779	0.793303	1.40904	0.0317826
ENSMUSP00000137299	family with sequence similarity 177, member A	Fam177a	pep chromosome:GRCm39:12:55171254:55188889:1 gene:ENSMUSG00000095595.3 transcript:ENSMUST00000177768.3 gene_biotype:protein_coding transcript_biotype:protein_coding gene_symbol:Fam177a description:family with sequence similarity 177, member A [Source:MGI Symbol;Acc:MGI:1920635]	10	2	2	3	207	23.6	4.59	1.11833	0.794643	1.40733	0.0324024
ENSMUSP00000050374	stratifin	Sfn	pep chromosome:GRCm39:4:133327867:133329479:-1 gene:ENSMUSG00000047281.4 transcript:ENSMUST00000057311.4 gene_biotype:protein_coding transcript_biotype:protein_coding gene_symbol:Sfn description:stratifin [Source:MGI Symbol;Acc:MGI:1891831]	21	2	6	19	248	27.7	4.78	0.778807	0.553829	1.40622	0.0328124
ENSMUSP00000020312	mitochondrial calcium uniporter	Mcu	pep chromosome:GRCm39:10:59282806:59452514:-1 gene:ENSMUSG00000009647.14 transcript:ENSMUST00000020312.13 gene_biotype:protein_coding transcript_biotype:protein_coding gene_symbol:Mcu description:mitochondrial calcium uniporter [Source:MGI Symbol;Acc:MGI:3026965]	25	9	9	15	350	39.7	8.56	0.97771	0.69553	1.4057	0.033006
ENSMUSP00000119441	talin 1	Tln1	pep chromosome:GRCm39:4:43555106:43558460:-1 gene:ENSMUSG00000028465.17 transcript:ENSMUST00000130353.2 gene_biotype:protein_coding transcript_biotype:protein_coding gene_symbol:Tln1 description:talin 1 [Source:MGI Symbol;Acc:MGI:1099832]	55	1	14	25	241	27.9	6.19	0.743052	0.529533	1.40322	0.0339452
ENSMUSP00000028844	signal peptide peptidase like 2A	Sppl2a	pep chromosome:GRCm39:2:126732311:126775155:-1 gene:ENSMUSG00000027366.13 transcript:ENSMUST00000028844.11 gene_biotype:protein_coding transcript_biotype:protein_coding gene_symbol:Sppl2a description:signal peptide peptidase like 2A [Source:MGI Symbol;Acc:MGI:1913802]	8	3	3	4	523	58.1	7.06	1.1445	0.816236	1.40216	0.0343527
ENSMUSP00000041347	internexin neuronal intermediate filament protein, alpha	Ina	pep chromosome:GRCm39:19:47003137:47013766:1 gene:ENSMUSG00000034336.4 transcript:ENSMUST00000037636.4 gene_biotype:protein_coding transcript_biotype:protein_coding gene_symbol:Ina description:internexin neuronal intermediate filament protein, alpha [Source:MGI Symbol;Acc:MGI:96568]	6	1	2	14	501	55.3	5.4	1.46086	1.04314	1.40044	0.0350251
ENSMUSP00000151886	hect domain and RLD 4	Herc4	pep chromosome:GRCm39:10:63079702:63153657:1 gene:ENSMUSG00000020064.10 transcript:ENSMUST00000219577.2 gene_biotype:protein_coding transcript_biotype:protein_coding gene_symbol:Herc4 description:hect domain and RLD 4 [Source:MGI Symbol;Acc:MGI:1914595]	9	10	10	14	1057	118.3	6.29	1.03948	0.742386	1.40019	0.0351246
ENSMUSP00000127716	phosphotyrosine interaction domain containing 1	Pid1	pep chromosome:GRCm39:1:84014017:84262366:-1 gene:ENSMUSG00000045658.17 transcript:ENSMUST00000168574.9 gene_biotype:protein_coding transcript_biotype:protein_coding gene_symbol:Pid1 description:phosphotyrosine interaction domain containing 1 [Source:MGI Symbol;Acc:MGI:2138391]	16	2	2	2	217	24.8	6.99	1.03545	0.739522	1.40016	0.0351357
ENSMUSP00000111204	asparagine synthetase	Asns	pep chromosome:GRCm39:6:7675169:7692871:-1 gene:ENSMUSG00000029752.13 transcript:ENSMUST00000115542.8 gene_biotype:protein_coding transcript_biotype:protein_coding gene_symbol:Asns description:asparagine synthetase [Source:MGI Symbol;Acc:MGI:1350929]	8	5	5	7	561	64.2	6.58	0.799609	0.571869	1.39824	0.0359038
ENSMUSP00000022163	basic transcription factor 3	Btf3	pep chromosome:GRCm39:13:98446404:98453475:-1 gene:ENSMUSG00000021660.15 transcript:ENSMUST00000022163.15 gene_biotype:protein_coding transcript_biotype:protein_coding gene_symbol:Btf3 description:basic transcription factor 3 [Source:MGI Symbol;Acc:MGI:1202875]	13	1	3	3	204	22	9.52	1.22305	0.876028	1.39613	0.036763
ENSMUSP00000087405	GTP cyclohydrolase 1	Gch1	pep chromosome:GRCm39:14:47391352:47426870:-1 gene:ENSMUSG00000037580.11 transcript:ENSMUST00000089959.7 gene_biotype:protein_coding transcript_biotype:protein_coding gene_symbol:Gch1 description:GTP cyclohydrolase 1 [Source:MGI Symbol;Acc:MGI:95675]	7	2	2	4	241	27	8.27	0.909812	0.651689	1.39608	0.0367823
ENSMUSP00000023217	block of proliferation 1	Bop1	pep chromosome:GRCm39:15:76337189:76361477:-1 gene:ENSMUSG00000022557.12 transcript:ENSMUST00000023217.11 gene_biotype:protein_coding transcript_biotype:protein_coding gene_symbol:Bop1 description:block of proliferation 1 [Source:MGI Symbol;Acc:MGI:1334460]	5	4	4	4	732	82.5	6.28	1.28647	0.921508	1.39605	0.0367975
ENSMUSP00000030622	SYF2 homolog, RNA splicing factor (S. cerevisiae)	Syf2	pep chromosome:GRCm39:4:134658209:134664859:1 gene:ENSMUSG00000028821.9 transcript:ENSMUST00000030622.3 gene_biotype:protein_coding transcript_biotype:protein_coding gene_symbol:Syf2 description:SYF2 homolog, RNA splicing factor (S. cerevisiae) [Source:MGI Symbol;Acc:MGI:1915842]	9	2	2	2	242	28.7	8.66	1.04269	0.746892	1.39604	0.0368011
ENSMUSP00000104504	YTH N6-methyladenosine RNA binding protein 1	Ythdf1	pep chromosome:GRCm39:2:180547163:180562742:-1 gene:ENSMUSG00000038848.15 transcript:ENSMUST00000108876.9 gene_biotype:protein_coding transcript_biotype:protein_coding gene_symbol:Ythdf1 description:YTH N6-methyladenosine RNA binding protein 1 [Source:MGI Symbol;Acc:MGI:1917431]	9	3	6	8	586	63.9	8.94	1.30671	0.936082	1.39594	0.0368423
ENSMUSP00000157898	centrosomal protein 55	Cep55	pep chromosome:GRCm39:19:38043485:38062871:1 gene:ENSMUSG00000024989.16 transcript:ENSMUST00000236044.2 gene_biotype:protein_coding transcript_biotype:protein_coding gene_symbol:Cep55 description:centrosomal protein 55 [Source:MGI Symbol;Acc:MGI:1921357]	3	1	1	1	462	53.9	7.94	1.03313	0.740382	1.39541	0.0370614
ENSMUSP00000069965	optic atrophy 3	Opa3	pep chromosome:GRCm39:7:18962259:18981793:1 gene:ENSMUSG00000052214.10 transcript:ENSMUST00000063976.9 gene_biotype:protein_coding transcript_biotype:protein_coding gene_symbol:Opa3 description:optic atrophy 3 [Source:MGI Symbol;Acc:MGI:2686271]	16	2	3	3	179	20.1	8.34	1.6182	1.16013	1.39484	0.0372971
ENSMUSP00000103486	mbt domain containing 1	Mbtd1	pep chromosome:GRCm39:11:93777045:93837811:1 gene:ENSMUSG00000059474.14 transcript:ENSMUST00000107854.9 gene_biotype:protein_coding transcript_biotype:protein_coding gene_symbol:Mbtd1 description:mbt domain containing 1 [Source:MGI Symbol;Acc:MGI:2143977]	3	1	2	2	631	70.6	7.77	0.760209	0.545114	1.39459	0.0374035
ENSMUSP00000132590	predicted gene 20390	Gm20390	pep chromosome:GRCm39:11:93840645:93859119:-1 gene:ENSMUSG00000091228.2 transcript:ENSMUST00000170303.2 gene_biotype:protein_coding transcript_biotype:protein_coding gene_symbol:Gm20390 description:predicted gene 20390 [Source:MGI Symbol;Acc:MGI:5141855]	56	10	10	28	267	30.2	8.72	1.16618	0.836365	1.39434	0.0375056
ENSMUSP00000026262	hexosaminidase A	Hexa	pep chromosome:GRCm39:9:59446823:59472392:1 gene:ENSMUSG00000025232.9 transcript:ENSMUST00000026262.8 gene_biotype:protein_coding transcript_biotype:protein_coding gene_symbol:Hexa description:hexosaminidase A [Source:MGI Symbol;Acc:MGI:96073]	36	16	16	55	528	60.6	6.54	1.15877	0.831373	1.39381	0.0377321
ENSMUSP00000065719	phospholipid phosphatase 3	Plpp3	pep chromosome:GRCm39:4:105014544:105089961:1 gene:ENSMUSG00000028517.9 transcript:ENSMUST00000064139.8 gene_biotype:protein_coding transcript_biotype:protein_coding gene_symbol:Plpp3 description:phospholipid phosphatase 3 [Source:MGI Symbol;Acc:MGI:1915166]	5	2	2	4	312	35.2	9.07	2.23776	1.60576	1.39358	0.0378273
ENSMUSP00000131297	histocompatibility 2, M region locus 2	H2-M2	pep chromosome:GRCm39:17:37791874:37794443:-1 gene:ENSMUSG00000016283.14 transcript:ENSMUST00000171139.3 gene_biotype:protein_coding transcript_biotype:protein_coding gene_symbol:H2-M2 description:histocompatibility 2, M region locus 2 [Source:MGI Symbol;Acc:MGI:95914]	2	1	1	1	343	39.3	5.41	1.08003	0.775212	1.3932	0.0379868
ENSMUSP00000094225	S-phase kinase-associated protein 2	Skp2	pep chromosome:GRCm39:15:9112073:9140452:-1 gene:ENSMUSG00000054115.13 transcript:ENSMUST00000096482.10 gene_biotype:protein_coding transcript_biotype:protein_coding gene_symbol:Skp2 description:S-phase kinase-associated protein 2 [Source:MGI Symbol;Acc:MGI:1351663]	4	1	2	4	424	47.7	7.69	1.65899	1.19108	1.39285	0.0381381
ENSMUSP00000002805	N(alpha)-acetyltransferase 20, NatB catalytic subunit	Naa20	pep chromosome:GRCm39:2:145745161:145758345:1 gene:ENSMUSG00000002728.15 transcript:ENSMUST00000002805.14 gene_biotype:protein_coding transcript_biotype:protein_coding gene_symbol:Naa20 description:N(alpha)-acetyltransferase 20, NatB catalytic subunit [Source:MGI Symbol;Acc:MGI:1915127]	5	1	1	2	188	21.5	5.15	0.74839	0.537705	1.39182	0.0385774
ENSMUSP00000117229	predicted gene 20521	Gm20521	pep chromosome:GRCm39:14:55120898:55135594:1 gene:ENSMUSG00000092232.2 transcript:ENSMUST00000134077.2 gene_biotype:protein_coding transcript_biotype:protein_coding gene_symbol:Gm20521 description:predicted gene 20521 [Source:MGI Symbol;Acc:MGI:5141986]	11	4	4	6	333	37.2	8.4	1.25997	0.905691	1.39117	0.0388617
ENSMUSP00000033582	cytochrome c oxidase subunit 7B	Cox7b	pep chromosome:GRCm39:X:105059306:105066056:1 gene:ENSMUSG00000031231.5 transcript:ENSMUST00000033582.5 gene_biotype:protein_coding transcript_biotype:protein_coding gene_symbol:Cox7b description:cytochrome c oxidase subunit 7B [Source:MGI Symbol;Acc:MGI:1913392]	9	1	1	1	80	9	10.27	0.954715	0.686483	1.39073	0.039049
ENSMUSP00000137310	predicted pseudogene 10184	Gm10184	pep chromosome:GRCm39:17:90215890:90217877:-1 gene:ENSMUSG00000066878.6 transcript:ENSMUST00000086423.6 gene_biotype:protein_coding transcript_biotype:protein_coding gene_symbol:Gm10184 description:predicted pseudogene 10184 [Source:MGI Symbol;Acc:MGI:3704480]	5	2	2	3	529	57.9	5.68	1.12334	0.809124	1.38834	0.040103
ENSMUSP00000151293	septin 10	Septin10	pep chromosome:GRCm39:10:58977449:59057669:-1 gene:ENSMUSG00000019917.11 transcript:ENSMUST00000220156.2 gene_biotype:protein_coding transcript_biotype:protein_coding gene_symbol:Septin10 description:septin 10 [Source:MGI Symbol;Acc:MGI:1918110]	5	1	2	4	452	52.4	6.6	0.839057	0.604419	1.3882	0.0401653
ENSMUSP00000004949	TNF receptor-associated factor 6	Traf6	pep chromosome:GRCm39:2:101508785:101532014:1 gene:ENSMUSG00000027164.9 transcript:ENSMUST00000004949.8 gene_biotype:protein_coding transcript_biotype:protein_coding gene_symbol:Traf6 description:TNF receptor-associated factor 6 [Source:MGI Symbol;Acc:MGI:108072]	3	1	1	1	530	60	6.55	1.1503	0.828773	1.38796	0.040276
ENSMUSP00000091769	talin rod domain containing 1	Tlnrd1	pep chromosome:GRCm39:7:83529081:83533513:-1 gene:ENSMUSG00000070462.5 transcript:ENSMUST00000094216.5 gene_biotype:protein_coding transcript_biotype:protein_coding gene_symbol:Tlnrd1 description:talin rod domain containing 1 [Source:MGI Symbol;Acc:MGI:1891420]	2	1	1	1	362	37.8	8.15	0.910863	0.656535	1.38738	0.0405355
ENSMUSP00000106436	glutamate rich 1	Erich1	pep chromosome:GRCm39:8:14077561:14140301:-1 gene:ENSMUSG00000051978.10 transcript:ENSMUST00000110813.5 gene_biotype:protein_coding transcript_biotype:protein_coding gene_symbol:Erich1 description:glutamate rich 1 [Source:MGI Symbol;Acc:MGI:3588201]	2	1	1	1	332	37.3	5.45	0.804762	0.580452	1.38644	0.04096
ENSMUSP00000044497	mitochondrial ribosomal protein L34	Mrpl34	pep chromosome:GRCm39:8:71917603:71918391:1 gene:ENSMUSG00000034880.8 transcript:ENSMUST00000048914.8 gene_biotype:protein_coding transcript_biotype:protein_coding gene_symbol:Mrpl34 description:mitochondrial ribosomal protein L34 [Source:MGI Symbol;Acc:MGI:2137227]	11	1	1	1	92	10.5	11.81	1.25792	0.909015	1.38382	0.0421673
ENSMUSP00000037023	solute carrier family 38, member 7	Slc38a7	pep chromosome:GRCm39:8:96562548:96580167:-1 gene:ENSMUSG00000036534.7 transcript:ENSMUST00000040481.4 gene_biotype:protein_coding transcript_biotype:protein_coding gene_symbol:Slc38a7 description:solute carrier family 38, member 7 [Source:MGI Symbol;Acc:MGI:2679005]	7	3	3	4	463	49.9	5.29	1.08162	0.781828	1.38345	0.0423415
ENSMUSP00000127990	dynein light chain Tctex-type 1A	Dynlt1a	pep chromosome:GRCm39:17:6358269:6367775:-1 gene:ENSMUSG00000092074.3 transcript:ENSMUST00000169415.3 gene_biotype:protein_coding transcript_biotype:protein_coding gene_symbol:Dynlt1a description:dynein light chain Tctex-type 1A [Source:MGI Symbol;Acc:MGI:3807506]	14	1	1	2	113	12.5	5.08	1.17739	0.851069	1.38343	0.0423511
ENSMUSP00000078572	torsin family 3, member A	Tor3a	pep chromosome:GRCm39:1:156481187:156501926:-1 gene:ENSMUSG00000060519.12 transcript:ENSMUST00000079625.11 gene_biotype:protein_coding transcript_biotype:protein_coding gene_symbol:Tor3a description:torsin family 3, member A [Source:MGI Symbol;Acc:MGI:1353652]	20	7	7	10	385	43.8	6.28	1.19901	0.867548	1.38206	0.0429956
ENSMUSP00000038502	complexin 1	Cplx1	pep chromosome:GRCm39:5:108666420:108697890:-1 gene:ENSMUSG00000033615.10 transcript:ENSMUST00000046892.10 gene_biotype:protein_coding transcript_biotype:protein_coding gene_symbol:Cplx1 description:complexin 1 [Source:MGI Symbol;Acc:MGI:104727]	15	1	1	1	134	15.1	4.97	1.02472	0.741477	1.38201	0.0430239
ENSMUSP00000034458	polypeptide N-acetylgalactosaminyltransferase 2	Galnt2	pep chromosome:GRCm39:8:124958130:125072461:1 gene:ENSMUSG00000089704.10 transcript:ENSMUST00000034458.9 gene_biotype:protein_coding transcript_biotype:protein_coding gene_symbol:Galnt2 description:polypeptide N-acetylgalactosaminyltransferase 2 [Source:MGI Symbol;Acc:MGI:894694]	26	13	14	21	570	64.5	8.53	1.26283	0.914207	1.38134	0.0433416
ENSMUSP00000021963	calcium modulating ligand	Caml	pep chromosome:GRCm39:13:55770818:55780224:1 gene:ENSMUSG00000021501.5 transcript:ENSMUST00000021963.5 gene_biotype:protein_coding transcript_biotype:protein_coding gene_symbol:Caml description:calcium modulating ligand [Source:MGI Symbol;Acc:MGI:104728]	2	1	1	1	294	32.5	7.74	1.37065	0.992279	1.38131	0.0433551
ENSMUSP00000046497	acyl-Coenzyme A dehydrogenase family, member 12	Acad12	pep chromosome:GRCm39:5:121734838:121757001:-1 gene:ENSMUSG00000042647.14 transcript:ENSMUST00000041252.13 gene_biotype:protein_coding transcript_biotype:protein_coding gene_symbol:Acad12 description:acyl-Coenzyme A dehydrogenase family, member 12 [Source:MGI Symbol;Acc:MGI:2443320]	16	3	9	12	555	61.4	9.36	1.36195	0.986751	1.38024	0.043873
ENSMUSP00000036614	biogenesis of lysosomal organelles complex-1, subunit 5, muted	Bloc1s5	pep chromosome:GRCm39:13:38782817:38819085:-1 gene:ENSMUSG00000038982.11 transcript:ENSMUST00000035899.8 gene_biotype:protein_coding transcript_biotype:protein_coding gene_symbol:Bloc1s5 description:biogenesis of lysosomal organelles complex-1, subunit 5, muted [Source:MGI Symbol;Acc:MGI:2178598]	28	5	5	8	185	21.3	7.34	1.01734	0.737332	1.37976	0.0441063
ENSMUSP00000131489	ribosomal protein L14	Rpl14	pep chromosome:GRCm39:9:120400510:120403720:1 gene:ENSMUSG00000025794.10 transcript:ENSMUST00000165532.3 gene_biotype:protein_coding transcript_biotype:protein_coding gene_symbol:Rpl14 description:ribosomal protein L14 [Source:MGI Symbol;Acc:MGI:1914365]	15	3	3	4	217	23.5	11.02	1.13265	0.821193	1.37927	0.0443417
ENSMUSP00000158805	farnesyl diphosphate farnesyl transferase 1	Fdft1	pep chromosome:GRCm39:14:63382599:63402374:-1 gene:ENSMUSG00000021273.12 transcript:ENSMUST00000238526.2 gene_biotype:protein_coding transcript_biotype:protein_coding gene_symbol:Fdft1 description:farnesyl diphosphate farnesyl transferase 1 [Source:MGI Symbol;Acc:MGI:102706]	2	1	1	1	460	52.1	7.12	1.36654	0.990867	1.37914	0.0444082
ENSMUSP00000140443	ER degradation enhancer, mannosidase alpha-like 3	Edem3	pep chromosome:GRCm39:1:151631122:151694686:1 gene:ENSMUSG00000043019.13 transcript:ENSMUST00000188145.7 gene_biotype:protein_coding transcript_biotype:protein_coding gene_symbol:Edem3 description:ER degradation enhancer, mannosidase alpha-like 3 [Source:MGI Symbol;Acc:MGI:1914217]	6	5	5	6	947	105.8	5.11	0.972645	0.705539	1.37858	0.0446797
ENSMUSP00000021990	phosphatidylserine synthase 1	Ptdss1	pep chromosome:GRCm39:13:67080894:67146465:1 gene:ENSMUSG00000021518.5 transcript:ENSMUST00000021990.4 gene_biotype:protein_coding transcript_biotype:protein_coding gene_symbol:Ptdss1 description:phosphatidylserine synthase 1 [Source:MGI Symbol;Acc:MGI:1276575]	3	2	2	2	473	55.6	8.28	1.32345	0.96048	1.3779	0.0450172
ENSMUSP00000095329	CASP8 and FADD-like apoptosis regulator	Cflar	pep chromosome:GRCm39:1:58750710:58793135:1 gene:ENSMUSG00000026031.16 transcript:ENSMUST00000097722.9 gene_biotype:protein_coding transcript_biotype:protein_coding gene_symbol:Cflar description:CASP8 and FADD-like apoptosis regulator [Source:MGI Symbol;Acc:MGI:1336166]	8	4	4	4	484	55.1	7.9	0.980774	0.711822	1.37784	0.0450497
ENSMUSP00000052465	WD repeat domain 36	Wdr36	pep chromosome:GRCm39:18:32970278:33000647:1 gene:ENSMUSG00000038299.17 transcript:ENSMUST00000053663.11 gene_biotype:protein_coding transcript_biotype:protein_coding gene_symbol:Wdr36 description:WD repeat domain 36 [Source:MGI Symbol;Acc:MGI:1917819]	3	3	3	3	899	99.7	7.11	1.06416	0.774077	1.37475	0.0466024
ENSMUSP00000033934	mitochondrial ribosomal protein S31	Mrps31	pep chromosome:GRCm39:8:22901377:22919681:1 gene:ENSMUSG00000031533.5 transcript:ENSMUST00000033934.5 gene_biotype:protein_coding transcript_biotype:protein_coding gene_symbol:Mrps31 description:mitochondrial ribosomal protein S31 [Source:MGI Symbol;Acc:MGI:1913153]	13	5	5	6	384	43.9	8.51	0.609675	0.44376	1.37389	0.0470481
ENSMUSP00000035644	GC-rich sequence DNA binding factor 2	Gcfc2	pep chromosome:GRCm39:6:81900650:81936896:1 gene:ENSMUSG00000035125.11 transcript:ENSMUST00000043195.11 gene_biotype:protein_coding transcript_biotype:protein_coding gene_symbol:Gcfc2 description:GC-rich sequence DNA binding factor 2 [Source:MGI Symbol;Acc:MGI:2141656]	4	3	3	3	769	87.4	5.55	0.818885	0.596206	1.37349	0.047251
ENSMUSP00000146675	presenilin enhancer gamma secretase subunit	Psenen	pep chromosome:GRCm39:7:30261288:30262512:-1 gene:ENSMUSG00000036835.8 transcript:ENSMUST00000207747.2 gene_biotype:protein_coding transcript_biotype:protein_coding gene_symbol:Psenen description:presenilin enhancer gamma secretase subunit [Source:MGI Symbol;Acc:MGI:1913590]	15	1	1	1	101	12	9.19	1.30296	0.949517	1.37224	0.0479064
ENSMUSP00000041175	cytochrome P450, family 2, subfamily s, polypeptide 1	Cyp2s1	pep chromosome:GRCm39:7:25501900:25516078:-1 gene:ENSMUSG00000040703.12 transcript:ENSMUST00000043314.10 gene_biotype:protein_coding transcript_biotype:protein_coding gene_symbol:Cyp2s1 description:cytochrome P450, family 2, subfamily s, polypeptide 1 [Source:MGI Symbol;Acc:MGI:1921384]	9	4	4	4	501	55.6	8.78	1.04829	0.764242	1.37167	0.0482036
ENSMUSP00000086459	mitogen-activated protein kinase kinase kinase 4	Map3k4	pep chromosome:GRCm39:17:12446508:12537683:-1 gene:ENSMUSG00000014426.10 transcript:ENSMUST00000089058.7 gene_biotype:protein_coding transcript_biotype:protein_coding gene_symbol:Map3k4 description:mitogen-activated protein kinase kinase kinase 4 [Source:MGI Symbol;Acc:MGI:1346875]	0	1	1	1	1597	179.7	6.43	0.67345	0.491247	1.3709	0.0486123
ENSMUSP00000130078	serum/glucocorticoid regulated kinase 3	Sgk3	pep chromosome:GRCm39:1:9868332:9971068:1 gene:ENSMUSG00000025915.15 transcript:ENSMUST00000166384.8 gene_biotype:protein_coding transcript_biotype:protein_coding gene_symbol:Sgk3 description:serum/glucocorticoid regulated kinase 3 [Source:MGI Symbol;Acc:MGI:2182368]	2	1	1	1	496	57.1	7.15	0.573545	0.418676	1.3699	0.0491462
ENSMUSP00000145462	src family associated phosphoprotein 2	Skap2	pep chromosome:GRCm39:6:51834402:51989529:-1 gene:ENSMUSG00000059182.9 transcript:ENSMUST00000204778.3 gene_biotype:protein_coding transcript_biotype:protein_coding gene_symbol:Skap2 description:src family associated phosphoprotein 2 [Source:MGI Symbol;Acc:MGI:1889206]	24	10	10	15	358	40.7	4.7	1.23587	0.902783	1.36896	0.049654
ENSMUSP00000110975	zinc finger protein 800	Zfp800	pep chromosome:GRCm39:6:28239926:28261910:-1 gene:ENSMUSG00000039841.15 transcript:ENSMUST00000115320.8 gene_biotype:protein_coding transcript_biotype:protein_coding gene_symbol:Zfp800 description:zinc finger protein 800 [Source:MGI Symbol;Acc:MGI:1889334]	4	3	3	3	662	74.8	9.42	0.894836	0.653948	1.36836	0.0499789
ENSMUSP00000146960	cytochrome c oxidase subunit 7A1	Cox7a1	pep chromosome:GRCm39:7:29883619:29885503:1 gene:ENSMUSG00000074218.4 transcript:ENSMUST00000208441.2 gene_biotype:protein_coding transcript_biotype:protein_coding gene_symbol:Cox7a1 description:cytochrome c oxidase subunit 7A1 [Source:MGI Symbol;Acc:MGI:1316714]	15	1	1	1	89	9.8	8.94	0.816138	1.06508	0.766269	0.0497529
ENSMUSP00000029257	ATPase, class VI, type 11B	Atp11b	pep chromosome:GRCm39:3:35808283:35910425:1 gene:ENSMUSG00000037400.18 transcript:ENSMUST00000029257.15 gene_biotype:protein_coding transcript_biotype:protein_coding gene_symbol:Atp11b description:ATPase, class VI, type 11B [Source:MGI Symbol;Acc:MGI:1923545]	2	1	3	3	1175	133.5	6.92	0.798232	1.0419	0.766129	0.0495999
ENSMUSP00000065423	C-type lectin domain family 16, member A	Clec16a	pep chromosome:GRCm39:16:10363251:10562735:1 gene:ENSMUSG00000068663.15 transcript:ENSMUST00000066345.15 gene_biotype:protein_coding transcript_biotype:protein_coding gene_symbol:Clec16a description:C-type lectin domain family 16, member A [Source:MGI Symbol;Acc:MGI:1921624]	1	1	1	1	1036	116.2	6.05	0.695854	0.908285	0.766119	0.0495894
ENSMUSP00000018645	nuclear receptor co-repressor 1	Ncor1	pep chromosome:GRCm39:11:62207252:62348158:-1 gene:ENSMUSG00000018501.18 transcript:ENSMUST00000018645.13 gene_biotype:protein_coding transcript_biotype:protein_coding gene_symbol:Ncor1 description:nuclear receptor co-repressor 1 [Source:MGI Symbol;Acc:MGI:1349717]	0	1	1	1	2454	270.6	6.93	0.862953	1.12702	0.765696	0.0491292
ENSMUSP00000109639	calcium channel flower domain containing 1	Cacfd1	pep chromosome:GRCm39:2:26899938:26911101:1 gene:ENSMUSG00000015488.15 transcript:ENSMUST00000114006.8 gene_biotype:protein_coding transcript_biotype:protein_coding gene_symbol:Cacfd1 description:calcium channel flower domain containing 1 [Source:MGI Symbol;Acc:MGI:1924317]	5	1	1	1	171	18.3	5.44	1.24938	1.63206	0.765521	0.0489408
ENSMUSP00000030103	distal membrane arm assembly complex 1	Dmac1	pep chromosome:GRCm39:4:75195591:75196542:-1 gene:ENSMUSG00000028398.9 transcript:ENSMUST00000030103.9 gene_biotype:protein_coding transcript_biotype:protein_coding gene_symbol:Dmac1 description:distal membrane arm assembly complex 1 [Source:MGI Symbol;Acc:MGI:1914178]	8	1	1	2	111	11.3	9.39	0.728459	0.951796	0.765352	0.0487583
ENSMUSP00000141648	fibrinogen gamma chain	Fgg	pep chromosome:GRCm39:3:82915168:82922012:1 gene:ENSMUSG00000033860.14 transcript:ENSMUST00000194175.2 gene_biotype:protein_coding transcript_biotype:protein_coding gene_symbol:Fgg description:fibrinogen gamma chain [Source:MGI Symbol;Acc:MGI:95526]	4	3	3	6	443	50.3	5.62	1.09651	1.43273	0.765324	0.0487282
ENSMUSP00000032216	parathymosin	Ptms	pep chromosome:GRCm39:6:124890644:124894909:-1 gene:ENSMUSG00000030122.13 transcript:ENSMUST00000032216.7 gene_biotype:protein_coding transcript_biotype:protein_coding gene_symbol:Ptms description:parathymosin [Source:MGI Symbol;Acc:MGI:1916452]	24	4	4	7	101	11.4	4.22	0.9541	1.24667	0.765319	0.0487225
ENSMUSP00000035167	nephronophthisis 3 (adolescent)	Nphp3	pep chromosome:GRCm39:9:103879745:103921017:1 gene:ENSMUSG00000032558.20 transcript:ENSMUST00000035167.15 gene_biotype:protein_coding transcript_biotype:protein_coding gene_symbol:Nphp3 description:nephronophthisis 3 (adolescent) [Source:MGI Symbol;Acc:MGI:1921275]	1	1	1	1	1325	150.2	6.51	0.610357	0.797654	0.76519	0.0485845
ENSMUSP00000021297	LSM12 homolog	Lsm12	pep chromosome:GRCm39:11:102053323:102076122:-1 gene:ENSMUSG00000020922.12 transcript:ENSMUST00000021297.6 gene_biotype:protein_coding transcript_biotype:protein_coding gene_symbol:Lsm12 description:LSM12 homolog [Source:MGI Symbol;Acc:MGI:1919592]	11	2	2	2	195	21.7	7.74	0.824472	1.07843	0.764514	0.0478638
ENSMUSP00000063016	expressed sequence AI467606	AI467606	pep chromosome:GRCm39:7:126690531:126693158:1 gene:ENSMUSG00000045165.7 transcript:ENSMUST00000056288.7 gene_biotype:protein_coding transcript_biotype:protein_coding gene_symbol:AI467606 description:expressed sequence AI467606 [Source:MGI Symbol;Acc:MGI:2141979]	4	1	1	1	225	24.5	5.38	0.537021	0.702827	0.764087	0.0474119
ENSMUSP00000132193	small integral membrane protein 26	Smim26	pep chromosome:GRCm39:2:144435974:144437286:1 gene:ENSMUSG00000074754.5 transcript:ENSMUST00000136628.2 gene_biotype:protein_coding transcript_biotype:protein_coding gene_symbol:Smim26 description:small integral membrane protein 26 [Source:MGI Symbol;Acc:MGI:2685407]	10	1	1	1	107	12	5.19	0.815146	1.06687	0.764052	0.0473754
ENSMUSP00000062576	nuclear casein kinase and cyclin-dependent kinase substrate 1	Nucks1	pep chromosome:GRCm39:1:131838294:131864059:1 gene:ENSMUSG00000026434.13 transcript:ENSMUST00000062264.8 gene_biotype:protein_coding transcript_biotype:protein_coding gene_symbol:Nucks1 description:nuclear casein kinase and cyclin-dependent kinase substrate 1 [Source:MGI Symbol;Acc:MGI:1934811]	12	3	3	4	234	26.3	5.14	1.02318	1.33946	0.763876	0.0471911
ENSMUSP00000051492	senataxin	Setx	pep chromosome:GRCm39:2:29015004:29072483:1 gene:ENSMUSG00000043535.14 transcript:ENSMUST00000061578.9 gene_biotype:protein_coding transcript_biotype:protein_coding gene_symbol:Setx description:senataxin [Source:MGI Symbol;Acc:MGI:2443480]	0	1	1	1	2646	297.4	6.83	0.738117	0.966722	0.763526	0.0468245
ENSMUSP00000159294	store-operated calcium entry-associated regulatory factor	Saraf	pep chromosome:GRCm39:8:34621717:34637999:1 gene:ENSMUSG00000031532.8 transcript:ENSMUST00000239436.2 gene_biotype:protein_coding transcript_biotype:protein_coding gene_symbol:Saraf description:store-operated calcium entry-associated regulatory factor [Source:MGI Symbol;Acc:MGI:1915137]	7	2	2	2	363	38.7	8.57	0.948521	1.24243	0.763442	0.0467378
ENSMUSP00000028603	F-box protein 3	Fbxo3	pep chromosome:GRCm39:2:103858066:103893585:1 gene:ENSMUSG00000027180.13 transcript:ENSMUST00000028603.10 gene_biotype:protein_coding transcript_biotype:protein_coding gene_symbol:Fbxo3 description:F-box protein 3 [Source:MGI Symbol;Acc:MGI:1929084]	2	1	1	1	480	55.2	5.02	0.967073	1.26722	0.763146	0.0464305
ENSMUSP00000138351	sosondowah ankyrin repeat domain family member C	Sowahc	pep chromosome:GRCm39:10:59057775:59062256:1 gene:ENSMUSG00000098188.2 transcript:ENSMUST00000182161.2 gene_biotype:protein_coding transcript_biotype:protein_coding gene_symbol:Sowahc description:sosondowah ankyrin repeat domain family member C [Source:MGI Symbol;Acc:MGI:3606051]	7	3	3	3	512	54.9	6	0.864921	1.13389	0.762791	0.0460635
ENSMUSP00000030842	leucine zipper and CTNNBIP1 domain containing	Lzic	pep chromosome:GRCm39:4:149569751:149581125:1 gene:ENSMUSG00000028990.14 transcript:ENSMUST00000030842.8 gene_biotype:protein_coding transcript_biotype:protein_coding gene_symbol:Lzic description:leucine zipper and CTNNBIP1 domain containing [Source:MGI Symbol;Acc:MGI:1916401]	10	2	2	2	190	21.5	4.96	0.91079	1.19419	0.762685	0.0459544
ENSMUSP00000053727	cytochrome c oxidase assembly factor 4	Coa4	pep chromosome:GRCm39:7:100186307:100189576:1 gene:ENSMUSG00000044881.8 transcript:ENSMUST00000054310.4 gene_biotype:protein_coding transcript_biotype:protein_coding gene_symbol:Coa4 description:cytochrome c oxidase assembly factor 4 [Source:MGI Symbol;Acc:MGI:1915435]	11	1	1	1	87	10.1	6.9	0.986231	1.29316	0.76265	0.0459191
ENSMUSP00000004910	eukaryotic translation initiation factor 2B, subunit 2 beta	Eif2b2	pep chromosome:GRCm39:12:85266255:85273402:1 gene:ENSMUSG00000004788.12 transcript:ENSMUST00000004910.12 gene_biotype:protein_coding transcript_biotype:protein_coding gene_symbol:Eif2b2 description:eukaryotic translation initiation factor 2B, subunit 2 beta [Source:MGI Symbol;Acc:MGI:2145118]	2	1	1	1	351	38.9	6.24	0.967047	1.26804	0.762632	0.0459002
ENSMUSP00000088035	transmembrane protein 167B	Tmem167b	pep chromosome:GRCm39:3:108463741:108469782:-1 gene:ENSMUSG00000068732.6 transcript:ENSMUST00000090546.6 gene_biotype:protein_coding transcript_biotype:protein_coding gene_symbol:Tmem167b description:transmembrane protein 167B [Source:MGI Symbol;Acc:MGI:1914745]	9	1	1	2	74	8.3	9.61	0.963972	1.26413	0.762556	0.0458219
ENSMUSP00000078123	mitochondrial ribosomal protein L18	Mrpl18	pep chromosome:GRCm39:17:13130236:13135232:-1 gene:ENSMUSG00000057388.10 transcript:ENSMUST00000079121.4 gene_biotype:protein_coding transcript_biotype:protein_coding gene_symbol:Mrpl18 description:mitochondrial ribosomal protein L18 [Source:MGI Symbol;Acc:MGI:1914931]	12	2	2	2	180	20.7	9.28	0.821015	1.07709	0.762253	0.0455127
ENSMUSP00000086025	ERGIC and golgi 3	Ergic3	pep chromosome:GRCm39:2:155850026:155860199:1 gene:ENSMUSG00000005881.14 transcript:ENSMUST00000088650.11 gene_biotype:protein_coding transcript_biotype:protein_coding gene_symbol:Ergic3 description:ERGIC and golgi 3 [Source:MGI Symbol;Acc:MGI:1913616]	12	5	5	6	394	44.4	6.33	1.00042	1.31291	0.761988	0.0452429
ENSMUSP00000020931	structural maintenance of chromosomes 6	Smc6	pep chromosome:GRCm39:12:11315887:11369786:1 gene:ENSMUSG00000020608.8 transcript:ENSMUST00000020931.6 gene_biotype:protein_coding transcript_biotype:protein_coding gene_symbol:Smc6 description:structural maintenance of chromosomes 6 [Source:MGI Symbol;Acc:MGI:1914491]	2	2	2	2	1097	127.1	7.17	0.964809	1.26647	0.76181	0.0450627
ENSMUSP00000111309	RAN binding protein 1	Ranbp1	pep chromosome:GRCm39:16:18057648:18066596:-1 gene:ENSMUSG00000005732.15 transcript:ENSMUST00000115645.10 gene_biotype:protein_coding transcript_biotype:protein_coding gene_symbol:Ranbp1 description:RAN binding protein 1 [Source:MGI Symbol;Acc:MGI:96269]	30	5	5	13	203	23.6	5.22	0.828949	1.08903	0.76118	0.0444293
ENSMUSP00000122157	predicted gene 14226	Gm14226	pep chromosome:GRCm39:2:154860186:154869024:1 gene:ENSMUSG00000084897.2 transcript:ENSMUST00000130870.2 gene_biotype:protein_coding transcript_biotype:protein_coding gene_symbol:Gm14226 description:predicted gene 14226 [Source:MGI Symbol;Acc:MGI:3649244]	1	1	1	1	686	76.3	8.06	0.703989	0.924888	0.761161	0.0444103
ENSMUSP00000131588	regulator of chromosome condensation (RCC1) and BTB (POZ) domain containing protein 2	Rcbtb2	pep chromosome:GRCm39:14:73379977:73421658:1 gene:ENSMUSG00000022106.15 transcript:ENSMUST00000164822.8 gene_biotype:protein_coding transcript_biotype:protein_coding gene_symbol:Rcbtb2 description:regulator of chromosome condensation (RCC1) and BTB (POZ) domain containing protein 2 [Source:MGI Symbol;Acc:MGI:1917200]	3	2	2	3	551	60.1	5.49	1.06993	1.40677	0.76056	0.0438122
ENSMUSP00000028081	plexin domain containing 2	Plxdc2	pep chromosome:GRCm39:2:16361115:16760650:1 gene:ENSMUSG00000026748.14 transcript:ENSMUST00000028081.13 gene_biotype:protein_coding transcript_biotype:protein_coding gene_symbol:Plxdc2 description:plexin domain containing 2 [Source:MGI Symbol;Acc:MGI:1914698]	2	1	1	1	530	59.6	6.6	0.813324	1.06939	0.760548	0.0438003
ENSMUSP00000035658	quiescin Q6 sulfhydryl oxidase 1	Qsox1	pep chromosome:GRCm39:1:155653904:155688635:-1 gene:ENSMUSG00000033684.15 transcript:ENSMUST00000035325.15 gene_biotype:protein_coding transcript_biotype:protein_coding gene_symbol:Qsox1 description:quiescin Q6 sulfhydryl oxidase 1 [Source:MGI Symbol;Acc:MGI:1330818]	3	2	2	2	748	82.7	7.17	1.00279	1.31887	0.760344	0.0435997
ENSMUSP00000112977	mitochondrial ribosomal protein L1	Mrpl1	pep chromosome:GRCm39:5:96357352:96414586:1 gene:ENSMUSG00000029486.14 transcript:ENSMUST00000117766.8 gene_biotype:protein_coding transcript_biotype:protein_coding gene_symbol:Mrpl1 description:mitochondrial ribosomal protein L1 [Source:MGI Symbol;Acc:MGI:2137202]	10	3	3	3	336	37.6	8.72	0.941258	1.23815	0.760211	0.0434686
ENSMUSP00000109884	frizzled class receptor 7	Fzd7	pep chromosome:GRCm39:1:59521583:59526114:1 gene:ENSMUSG00000041075.9 transcript:ENSMUST00000114246.4 gene_biotype:protein_coding transcript_biotype:protein_coding gene_symbol:Fzd7 description:frizzled class receptor 7 [Source:MGI Symbol;Acc:MGI:108570]	2	1	1	1	572	63.7	7.91	0.756081	0.994745	0.760075	0.0433351
ENSMUSP00000067002	phospholipase D family, member 4	Pld4	pep chromosome:GRCm39:12:112727089:112735424:1 gene:ENSMUSG00000052160.8 transcript:ENSMUST00000063888.5 gene_biotype:protein_coding transcript_biotype:protein_coding gene_symbol:Pld4 description:phospholipase D family, member 4 [Source:MGI Symbol;Acc:MGI:2144765]	33	12	12	44	503	56.1	7.31	0.886312	1.16622	0.759989	0.0432508
ENSMUSP00000074340	hemicentin 1	Hmcn1	pep chromosome:GRCm39:1:150438275:150868802:-1 gene:ENSMUSG00000066842.19 transcript:ENSMUST00000074783.12 gene_biotype:protein_coding transcript_biotype:protein_coding gene_symbol:Hmcn1 description:hemicentin 1 [Source:MGI Symbol;Acc:MGI:2685047]	0	1	1	1	5634	611.2	6.64	1.17353	1.54438	0.759866	0.0431307
ENSMUSP00000002855	KDEL (Lys-Asp-Glu-Leu) endoplasmic reticulum protein retention receptor 1	Kdelr1	pep chromosome:GRCm39:7:45522196:45533156:1 gene:ENSMUSG00000002778.15 transcript:ENSMUST00000002855.14 gene_biotype:protein_coding transcript_biotype:protein_coding gene_symbol:Kdelr1 description:KDEL (Lys-Asp-Glu-Leu) endoplasmic reticulum protein retention receptor 1 [Source:MGI Symbol;Acc:MGI:1915387]	9	2	2	3	212	24.5	8.62	0.92142	1.21338	0.759384	0.0426613
ENSMUSP00000117687	F-box protein 30	Fbxo30	pep chromosome:GRCm39:10:11157074:11173796:1 gene:ENSMUSG00000047648.14 transcript:ENSMUST00000129456.8 gene_biotype:protein_coding transcript_biotype:protein_coding gene_symbol:Fbxo30 description:F-box protein 30 [Source:MGI Symbol;Acc:MGI:1919115]	1	1	1	1	746	82.6	5.26	0.706879	0.930873	0.759372	0.0426499
ENSMUSP00000112846	secretory carrier membrane protein 3	Scamp3	pep chromosome:GRCm39:3:89084797:89090072:1 gene:ENSMUSG00000028049.16 transcript:ENSMUST00000120697.8 gene_biotype:protein_coding transcript_biotype:protein_coding gene_symbol:Scamp3 description:secretory carrier membrane protein 3 [Source:MGI Symbol;Acc:MGI:1346346]	15	4	4	7	350	38.6	7.64	1.12764	1.48674	0.758466	0.0417791
ENSMUSP00000134530	predicted gene 20503	Gm20503	pep chromosome:GRCm39:4:59003210:59041888:1 gene:ENSMUSG00000092345.2 transcript:ENSMUST00000174664.2 gene_biotype:protein_coding transcript_biotype:protein_coding gene_symbol:Gm20503 description:predicted gene 20503 [Source:MGI Symbol;Acc:MGI:5141968]	10	1	1	1	150	16	8.6	0.965193	1.27362	0.757837	0.0411829
ENSMUSP00000089051	syntaxin binding protein 1	Stxbp1	pep chromosome:GRCm39:2:32677973:32737214:-1 gene:ENSMUSG00000026797.17 transcript:ENSMUST00000077458.7 gene_biotype:protein_coding transcript_biotype:protein_coding gene_symbol:Stxbp1 description:syntaxin binding protein 1 [Source:MGI Symbol;Acc:MGI:107363]	8	5	5	6	603	68.7	6.77	0.929729	1.23088	0.755336	0.0388798
ENSMUSP00000033160	golgi associated, gamma adaptin ear containing, ARF binding protein 2	Gga2	pep chromosome:GRCm39:7:121585945:121620445:-1 gene:ENSMUSG00000030872.15 transcript:ENSMUST00000033160.15 gene_biotype:protein_coding transcript_biotype:protein_coding gene_symbol:Gga2 description:golgi associated, gamma adaptin ear containing, ARF binding protein 2 [Source:MGI Symbol;Acc:MGI:1921355]	8	5	5	6	603	66	7.3	1.03343	1.36817	0.755336	0.0388795
ENSMUSP00000110232	high mobility group box 3	Hmgb3	pep chromosome:GRCm39:X:70599524:70604282:1 gene:ENSMUSG00000015217.12 transcript:ENSMUST00000072699.13 gene_biotype:protein_coding transcript_biotype:protein_coding gene_symbol:Hmgb3 description:high mobility group box 3 [Source:MGI Symbol;Acc:MGI:1098219]	17	2	3	4	200	23	8.37	0.757927	1.00429	0.754692	0.0383029
ENSMUSP00000034746	meiosis-specific nuclear structural protein 1	Mns1	pep chromosome:GRCm39:9:72345817:72369307:1 gene:ENSMUSG00000032221.15 transcript:ENSMUST00000034746.10 gene_biotype:protein_coding transcript_biotype:protein_coding gene_symbol:Mns1 description:meiosis-specific nuclear structural protein 1 [Source:MGI Symbol;Acc:MGI:107933]	2	1	1	2	491	60.2	6.65	1.10118	1.46078	0.753831	0.0375431
ENSMUSP00000018614	potassium voltage-gated channel, shaker-related subfamily, beta member 3	Kcnab3	pep chromosome:GRCm39:11:69217084:69223868:1 gene:ENSMUSG00000018470.9 transcript:ENSMUST00000018614.3 gene_biotype:protein_coding transcript_biotype:protein_coding gene_symbol:Kcnab3 description:potassium voltage-gated channel, shaker-related subfamily, beta member 3 [Source:MGI Symbol;Acc:MGI:1336208]	8	1	1	1	404	43.8	8.54	1.30034	1.72521	0.753727	0.0374522
ENSMUSP00000099420	keratin 10	Krt10	pep chromosome:GRCm39:11:99276080:99280190:-1 gene:ENSMUSG00000019761.11 transcript:ENSMUST00000103131.5 gene_biotype:protein_coding transcript_biotype:protein_coding gene_symbol:Krt10 description:keratin 10 [Source:MGI Symbol;Acc:MGI:96685]	18	7	11	31	561	57	5.07	1.21174	1.608	0.753571	0.0373161
ENSMUSP00000026173	WD repeat domain 45B	Wdr45b	pep chromosome:GRCm39:11:121218050:121245271:-1 gene:ENSMUSG00000025173.14 transcript:ENSMUST00000026173.13 gene_biotype:protein_coding transcript_biotype:protein_coding gene_symbol:Wdr45b description:WD repeat domain 45B [Source:MGI Symbol;Acc:MGI:1914090]	4	1	2	3	344	38	7.56	1.10333	1.46424	0.75352	0.0372716
ENSMUSP00000029414	signal sequence receptor, gamma	Ssr3	pep chromosome:GRCm39:3:65287076:65300044:-1 gene:ENSMUSG00000027828.13 transcript:ENSMUST00000029414.12 gene_biotype:protein_coding transcript_biotype:protein_coding gene_symbol:Ssr3 description:signal sequence receptor, gamma [Source:MGI Symbol;Acc:MGI:1914687]	8	1	1	2	185	21.1	9.61	1.11425	1.47908	0.753343	0.0371173
ENSMUSP00000085423	zinc finger protein X-linked	Zfx	pep chromosome:GRCm39:X:93118237:93167013:-1 gene:ENSMUSG00000079509.11 transcript:ENSMUST00000088102.12 gene_biotype:protein_coding transcript_biotype:protein_coding gene_symbol:Zfx description:zinc finger protein X-linked [Source:MGI Symbol;Acc:MGI:99211]	1	1	1	1	799	90	6.19	0.916563	1.21721	0.753002	0.0368232
ENSMUSP00000033264	tripartite motif-containing 21	Trim21	pep chromosome:GRCm39:7:102207128:102214693:-1 gene:ENSMUSG00000030966.14 transcript:ENSMUST00000033264.12 gene_biotype:protein_coding transcript_biotype:protein_coding gene_symbol:Trim21 description:tripartite motif-containing 21 [Source:MGI Symbol;Acc:MGI:106657]	7	4	4	4	462	53.3	6.7	0.896444	1.19065	0.752901	0.0367358
ENSMUSP00000027114	matrix AAA peptidase interacting protein 1	Maip1	pep chromosome:GRCm39:1:57445487:57457112:1 gene:ENSMUSG00000025971.7 transcript:ENSMUST00000027114.6 gene_biotype:protein_coding transcript_biotype:protein_coding gene_symbol:Maip1 description:matrix AAA peptidase interacting protein 1 [Source:MGI Symbol;Acc:MGI:1915365]	18	5	5	6	291	33	9.14	1.02995	1.36811	0.752827	0.0366721
ENSMUSP00000107060	cellular repressor of E1A-stimulated genes 1	Creg1	pep chromosome:GRCm39:1:165591315:165602877:1 gene:ENSMUSG00000040713.13 transcript:ENSMUST00000111432.10 gene_biotype:protein_coding transcript_biotype:protein_coding gene_symbol:Creg1 description:cellular repressor of E1A-stimulated genes 1 [Source:MGI Symbol;Acc:MGI:1344382]	10	3	3	5	220	24.4	6.42	1.18929	1.57978	0.752823	0.0366686
ENSMUSP00000144369	microrchidia 3	Morc3	pep chromosome:GRCm39:16:93629009:93672961:1 gene:ENSMUSG00000039456.11 transcript:ENSMUST00000202261.5 gene_biotype:protein_coding transcript_biotype:protein_coding gene_symbol:Morc3 description:microrchidia 3 [Source:MGI Symbol;Acc:MGI:2136841]	5	4	4	5	942	106.5	5.68	0.94074	1.25122	0.751855	0.0358447
ENSMUSP00000045201	WD repeat domain, phosphoinositide interacting 2	Wipi2	pep chromosome:GRCm39:5:142615297:142656343:1 gene:ENSMUSG00000029578.16 transcript:ENSMUST00000036872.16 gene_biotype:protein_coding transcript_biotype:protein_coding gene_symbol:Wipi2 description:WD repeat domain, phosphoinositide interacting 2 [Source:MGI Symbol;Acc:MGI:1923831]	4	1	2	3	445	48.4	5.86	0.909651	1.20994	0.751816	0.0358112
ENSMUSP00000134879	synaptogyrin 2	Syngr2	pep chromosome:GRCm39:11:117700538:117704558:1 gene:ENSMUSG00000048277.16 transcript:ENSMUST00000175737.2 gene_biotype:protein_coding transcript_biotype:protein_coding gene_symbol:Syngr2 description:synaptogyrin 2 [Source:MGI Symbol;Acc:MGI:1328324]	18	2	2	5	147	15.7	6.49	0.759113	1.00973	0.7518	0.0357975
ENSMUSP00000022153	pentatricopeptide repeat domain 2	Ptcd2	pep chromosome:GRCm39:13:99456155:99481213:-1 gene:ENSMUSG00000021650.8 transcript:ENSMUST00000022153.8 gene_biotype:protein_coding transcript_biotype:protein_coding gene_symbol:Ptcd2 description:pentatricopeptide repeat domain 2 [Source:MGI Symbol;Acc:MGI:1916177]	4	2	2	2	381	43.8	9.04	0.957537	1.27389	0.751662	0.0356818
ENSMUSP00000108573	macrophage expressed gene 1	Mpeg1	pep chromosome:GRCm39:19:12438143:12442647:1 gene:ENSMUSG00000046805.11 transcript:ENSMUST00000081035.9 gene_biotype:protein_coding transcript_biotype:protein_coding gene_symbol:Mpeg1 description:macrophage expressed gene 1 [Source:MGI Symbol;Acc:MGI:1333743]	18	12	12	33	720	79.1	6.04	1.3085	1.74276	0.750822	0.0349806
ENSMUSP00000151388	centrosomal protein 290	Cep290	pep chromosome:GRCm39:10:100323420:100409517:1 gene:ENSMUSG00000019971.11 transcript:ENSMUST00000220346.2 gene_biotype:protein_coding transcript_biotype:protein_coding gene_symbol:Cep290 description:centrosomal protein 290 [Source:MGI Symbol;Acc:MGI:2384917]	0	1	1	1	2479	289.8	6.21	0.946188	1.26041	0.750696	0.0348768
ENSMUSP00000066990	mitochondrial ribosomal protein S21	Mrps21	pep chromosome:GRCm39:3:95769946:95778831:-1 gene:ENSMUSG00000054312.7 transcript:ENSMUST00000067298.5 gene_biotype:protein_coding transcript_biotype:protein_coding gene_symbol:Mrps21 description:mitochondrial ribosomal protein S21 [Source:MGI Symbol;Acc:MGI:1913542]	25	2	2	2	87	10.6	10.32	0.900788	1.20005	0.750628	0.0348204
ENSMUSP00000032844	transmembrane protein 126A	Tmem126a	pep chromosome:GRCm39:7:90099908:90106437:-1 gene:ENSMUSG00000030615.13 transcript:ENSMUST00000032844.7 gene_biotype:protein_coding transcript_biotype:protein_coding gene_symbol:Tmem126a description:transmembrane protein 126A [Source:MGI Symbol;Acc:MGI:1913521]	9	2	2	2	196	21.5	9.41	0.981296	1.30769	0.750405	0.0346373
ENSMUSP00000087192	3-hydroxybutyrate dehydrogenase, type 1	Bdh1	pep chromosome:GRCm39:16:31241098:31276315:1 gene:ENSMUSG00000046598.16 transcript:ENSMUST00000089759.9 gene_biotype:protein_coding transcript_biotype:protein_coding gene_symbol:Bdh1 description:3-hydroxybutyrate dehydrogenase, type 1 [Source:MGI Symbol;Acc:MGI:1919161]	12	3	3	3	343	38.3	9.01	1.2639	1.68595	0.749663	0.0340319
ENSMUSP00000070868	phospholipase A2, group IVA (cytosolic, calcium-dependent)	Pla2g4a	pep chromosome:GRCm39:1:149705369:149837041:-1 gene:ENSMUSG00000056220.15 transcript:ENSMUST00000070200.15 gene_biotype:protein_coding transcript_biotype:protein_coding gene_symbol:Pla2g4a description:phospholipase A2, group IVA (cytosolic, calcium-dependent) [Source:MGI Symbol;Acc:MGI:1195256]	6	5	5	6	748	85.2	5.43	0.921985	1.22988	0.749657	0.0340273
ENSMUSP00000060462	3-hydroxyacyl-CoA dehydratase 2	Hacd2	pep chromosome:GRCm39:16:34842798:34929547:1 gene:ENSMUSG00000035376.11 transcript:ENSMUST00000061156.10 gene_biotype:protein_coding transcript_biotype:protein_coding gene_symbol:Hacd2 description:3-hydroxyacyl-CoA dehydratase 2 [Source:MGI Symbol;Acc:MGI:1918007]	9	2	2	3	254	28.4	9.58	0.771161	1.02967	0.748944	0.0334534
ENSMUSP00000028071	Bmi1 polycomb ring finger oncogene	Bmi1	pep chromosome:GRCm39:2:18681829:18691440:1 gene:ENSMUSG00000026739.14 transcript:ENSMUST00000028071.13 gene_biotype:protein_coding transcript_biotype:protein_coding gene_symbol:Bmi1 description:Bmi1 polycomb ring finger oncogene [Source:MGI Symbol;Acc:MGI:88174]	3	1	1	1	324	36.7	8.65	1.20423	1.6092	0.74834	0.0329739
ENSMUSP00000059977	prostaglandin-endoperoxide synthase 1	Ptgs1	pep chromosome:GRCm39:2:36120438:36142284:1 gene:ENSMUSG00000047250.14 transcript:ENSMUST00000062069.6 gene_biotype:protein_coding transcript_biotype:protein_coding gene_symbol:Ptgs1 description:prostaglandin-endoperoxide synthase 1 [Source:MGI Symbol;Acc:MGI:97797]	14	6	7	10	602	69	6.83	1.09519	1.46409	0.748036	0.0327345
ENSMUSP00000015596	advanced glycosylation end product-specific receptor	Ager	pep chromosome:GRCm39:17:34816836:34819906:1 gene:ENSMUSG00000015452.15 transcript:ENSMUST00000015596.10 gene_biotype:protein_coding transcript_biotype:protein_coding gene_symbol:Ager description:advanced glycosylation end product-specific receptor [Source:MGI Symbol;Acc:MGI:893592]	2	1	1	1	402	42.6	6.07	1.00486	1.34345	0.74797	0.0326827
ENSMUSP00000028105	MINDY lysine 48 deubiquitinase 3	Mindy3	pep chromosome:GRCm39:2:12352074:12424281:-1 gene:ENSMUSG00000026767.13 transcript:ENSMUST00000028105.13 gene_biotype:protein_coding transcript_biotype:protein_coding gene_symbol:Mindy3 description:MINDY lysine 48 deubiquitinase 3 [Source:MGI Symbol;Acc:MGI:1914210]	2	1	1	1	444	49.6	4.78	0.659534	0.882224	0.747581	0.032379
ENSMUSP00000004987	serine/arginine-rich protein specific kinase 1	Srpk1	pep chromosome:GRCm39:17:28808564:28826166:-1 gene:ENSMUSG00000004865.17 transcript:ENSMUST00000004987.17 gene_biotype:protein_coding transcript_biotype:nonsense_mediated_decay gene_symbol:Srpk1 description:serine/arginine-rich protein specific kinase 1 [Source:MGI Symbol;Acc:MGI:106908]	3	2	2	7	223	25.3	9.6	0.691495	0.925708	0.74699	0.0319219
ENSMUSP00000143606	ubiquitin-conjugating enzyme E2D 3	Ube2d3	pep chromosome:GRCm39:3:135144972:135172436:1 gene:ENSMUSG00000078578.10 transcript:ENSMUST00000197134.3 gene_biotype:protein_coding transcript_biotype:protein_coding gene_symbol:Ube2d3 description:ubiquitin-conjugating enzyme E2D 3 [Source:MGI Symbol;Acc:MGI:1913355]	12	2	2	3	148	16.8	7.3	0.808772	1.08304	0.746762	0.0317468
ENSMUSP00000054499	fibronectin 1	Fn1	pep chromosome:GRCm39:1:71624683:71692334:-1 gene:ENSMUSG00000026193.16 transcript:ENSMUST00000055226.13 gene_biotype:protein_coding transcript_biotype:protein_coding gene_symbol:Fn1 description:fibronectin 1 [Source:MGI Symbol;Acc:MGI:95566]	11	24	24	42	2477	272.4	5.59	0.985074	1.32001	0.74626	0.0313643
ENSMUSP00000089948	methyl-CpG binding domain protein 3	Mbd3	pep chromosome:GRCm39:10:80228373:80235384:-1 gene:ENSMUSG00000035478.15 transcript:ENSMUST00000092295.10 gene_biotype:protein_coding transcript_biotype:protein_coding gene_symbol:Mbd3 description:methyl-CpG binding domain protein 3 [Source:MGI Symbol;Acc:MGI:1333812]	14	3	4	5	285	32.1	5.82	1.05975	1.42018	0.746208	0.0313246
ENSMUSP00000048901	multivesicular body subunit 12B	Mvb12b	pep chromosome:GRCm39:2:33619965:33777958:-1 gene:ENSMUSG00000038740.10 transcript:ENSMUST00000041555.10 gene_biotype:protein_coding transcript_biotype:protein_coding gene_symbol:Mvb12b description:multivesicular body subunit 12B [Source:MGI Symbol;Acc:MGI:1919793]	3	1	1	1	317	35.4	7.93	0.985952	1.32187	0.745879	0.0310764
ENSMUSP00000137625	Shc SH2-domain binding protein 1-like	Shcbp1l	pep chromosome:GRCm39:1:153300918:153315683:1 gene:ENSMUSG00000042708.13 transcript:ENSMUST00000136614.2 gene_biotype:protein_coding transcript_biotype:nonsense_mediated_decay gene_symbol:Shcbp1l description:Shc SH2-domain binding protein 1-like [Source:MGI Symbol;Acc:MGI:1919086]	4	1	1	1	424	47.9	5.16	0.771909	1.03567	0.74532	0.0306574
ENSMUSP00000031103	UDP-glucose dehydrogenase	Ugdh	pep chromosome:GRCm39:5:65570564:65593292:-1 gene:ENSMUSG00000029201.15 transcript:ENSMUST00000031103.14 gene_biotype:protein_coding transcript_biotype:protein_coding gene_symbol:Ugdh description:UDP-glucose dehydrogenase [Source:MGI Symbol;Acc:MGI:1306785]	8	4	4	5	493	54.8	7.56	1.06912	1.43563	0.744704	0.030202
ENSMUSP00000138108	general transcription factor II H, polypeptide 2	Gtf2h2	pep chromosome:GRCm39:13:100596726:100628846:-1 gene:ENSMUSG00000021639.18 transcript:ENSMUST00000145266.8 gene_biotype:protein_coding transcript_biotype:nonsense_mediated_decay gene_symbol:Gtf2h2 description:general transcription factor II H, polypeptide 2 [Source:MGI Symbol;Acc:MGI:1345669]	2	1	1	1	398	44.8	6.83	0.989419	1.32864	0.744686	0.0301883
ENSMUSP00000129001	nuclear factor of activated T cells, cytoplasmic, calcineurin dependent 1	Nfatc1	pep chromosome:GRCm39:18:80649420:80755981:-1 gene:ENSMUSG00000033016.17 transcript:ENSMUST00000170905.9 gene_biotype:protein_coding transcript_biotype:protein_coding gene_symbol:Nfatc1 description:nuclear factor of activated T cells, cytoplasmic, calcineurin dependent 1 [Source:MGI Symbol;Acc:MGI:102469]	1	1	1	1	939	101.5	7.05	0.86146	1.15736	0.744334	0.0299301
ENSMUSP00000093970	RIKEN cDNA 1810009A15 gene	1810009A15Rik	pep chromosome:GRCm39:19:8866217:8868245:1 gene:ENSMUSG00000071653.10 transcript:ENSMUST00000096251.10 gene_biotype:protein_coding transcript_biotype:protein_coding gene_symbol:1810009A15Rik description:RIKEN cDNA 1810009A15 gene [Source:MGI Symbol;Acc:MGI:1913526]	7	1	1	1	123	14.1	11.47	1.0269	1.37966	0.744309	0.0299122
ENSMUSP00000159422	ribosomal protein S6 kinase, polypeptide 4	RPS6KA4	pep chromosome:GRCm39:19:6806578:6818004:-1 gene:ENSMUSG00000118668.1 transcript:ENSMUST00000239527.1 gene_biotype:protein_coding transcript_biotype:protein_coding gene_symbol:RPS6KA4 description:ribosomal protein S6 kinase, polypeptide 4 [Source:NCBI gene (formerly Entrezgene);Acc:56613]	1	1	1	1	773	85.6	8.27	1.09265	1.46803	0.744299	0.0299045
ENSMUSP00000022600	mitochondrial translational release factor 1	Mtrf1	pep chromosome:GRCm39:14:79635212:79661027:1 gene:ENSMUSG00000022022.4 transcript:ENSMUST00000022600.4 gene_biotype:protein_coding transcript_biotype:protein_coding gene_symbol:Mtrf1 description:mitochondrial translational release factor 1 [Source:MGI Symbol;Acc:MGI:2384815]	5	2	2	2	446	52.4	8.35	0.881194	1.18421	0.744121	0.0297748
ENSMUSP00000002274	napsin A aspartic peptidase	Napsa	pep chromosome:GRCm39:7:44221804:44236286:1 gene:ENSMUSG00000002204.10 transcript:ENSMUST00000002274.10 gene_biotype:protein_coding transcript_biotype:protein_coding gene_symbol:Napsa description:napsin A aspartic peptidase [Source:MGI Symbol;Acc:MGI:109365]	10	2	2	2	419	45.5	7.5	1.05731	1.42155	0.743777	0.0295256
ENSMUSP00000101312	transmembrane protein 201	Tmem201	pep chromosome:GRCm39:4:149799832:149822501:-1 gene:ENSMUSG00000044700.16 transcript:ENSMUST00000105687.9 gene_biotype:protein_coding transcript_biotype:protein_coding gene_symbol:Tmem201 description:transmembrane protein 201 [Source:MGI Symbol;Acc:MGI:1196277]	1	1	1	1	664	72.5	9.2	0.830555	1.11669	0.743762	0.0295151
ENSMUSP00000032888	ADP-ribosylation factor-like 6 interacting protein 1	Arl6ip1	pep chromosome:GRCm39:7:117718114:117728885:-1 gene:ENSMUSG00000030654.10 transcript:ENSMUST00000032888.10 gene_biotype:protein_coding transcript_biotype:protein_coding gene_symbol:Arl6ip1 description:ADP-ribosylation factor-like 6 interacting protein 1 [Source:MGI Symbol;Acc:MGI:1858943]	9	2	2	4	203	23.4	9.32	0.904853	1.21787	0.742977	0.0289522
ENSMUSP00000027492	mitochondrial transcription termination factor 4	Mterf4	pep chromosome:GRCm39:1:93228927:93233637:-1 gene:ENSMUSG00000026273.14 transcript:ENSMUST00000027492.14 gene_biotype:protein_coding transcript_biotype:protein_coding gene_symbol:Mterf4 description:mitochondrial transcription termination factor 4 [Source:MGI Symbol;Acc:MGI:1918355]	3	1	1	1	346	40.2	6.67	0.892962	1.20408	0.741614	0.0279956
ENSMUSP00000028241	stomatin	Stom	pep chromosome:GRCm39:2:35203998:35226988:-1 gene:ENSMUSG00000026880.12 transcript:ENSMUST00000028241.7 gene_biotype:protein_coding transcript_biotype:protein_coding gene_symbol:Stom description:stomatin [Source:MGI Symbol;Acc:MGI:95403]	52	12	12	42	284	31.4	6.93	0.980197	1.32256	0.741135	0.0276657
ENSMUSP00000111412	chloride channel, voltage-sensitive 5	Clcn5	pep chromosome:GRCm39:X:7025708:7185472:-1 gene:ENSMUSG00000004317.15 transcript:ENSMUST00000115746.8 gene_biotype:protein_coding transcript_biotype:protein_coding gene_symbol:Clcn5 description:chloride channel, voltage-sensitive 5 [Source:MGI Symbol;Acc:MGI:99486]	2	1	2	2	816	90.6	6.54	0.808083	1.09189	0.740079	0.0269495
ENSMUSP00000023832	regucalcin	Rgn	pep chromosome:GRCm39:X:20416026:20428328:1 gene:ENSMUSG00000023070.7 transcript:ENSMUST00000023832.7 gene_biotype:protein_coding transcript_biotype:protein_coding gene_symbol:Rgn description:regucalcin [Source:MGI Symbol;Acc:MGI:108024]	6	2	2	2	299	33.4	5.34	0.777514	1.0508	0.739925	0.0268459
ENSMUSP00000104272	phospholipid scramblase 3	Plscr3	pep chromosome:GRCm39:11:69737202:69741862:1 gene:ENSMUSG00000019461.13 transcript:ENSMUST00000108632.8 gene_biotype:protein_coding transcript_biotype:protein_coding gene_symbol:Plscr3 description:phospholipid scramblase 3 [Source:MGI Symbol;Acc:MGI:1917560]	11	3	3	3	296	31.8	6.38	1.14879	1.5526	0.739917	0.026841
ENSMUSP00000023611	a disintegrin-like and metallopeptidase (reprolysin type) with thrombospondin type 1 motif, 5 (aggrecanase-2)	Adamts5	pep chromosome:GRCm39:16:85653061:85698716:-1 gene:ENSMUSG00000022894.7 transcript:ENSMUST00000023611.7 gene_biotype:protein_coding transcript_biotype:protein_coding gene_symbol:Adamts5 description:a disintegrin-like and metallopeptidase (reprolysin type) with thrombospondin type 1 motif, 5 (aggrecanase-2) [Source:MGI Symbol;Acc:MGI:1346321]	1	1	1	1	930	101.8	8.72	1.0204	1.37923	0.739832	0.0267839
ENSMUSP00000038964	RNA binding motif (RNP1, RRM) protein 3	Rbm3	pep chromosome:GRCm39:X:8005217:8011936:-1 gene:ENSMUSG00000031167.17 transcript:ENSMUST00000040010.10 gene_biotype:protein_coding transcript_biotype:protein_coding gene_symbol:Rbm3 description:RNA binding motif (RNP1, RRM) protein 3 [Source:MGI Symbol;Acc:MGI:1099460]	11	2	2	5	154	16.8	8.38	0.968942	1.30985	0.739736	0.0267201
ENSMUSP00000074471	interleukin-1 receptor-associated kinase 4	Irak4	pep chromosome:GRCm39:15:94441524:94466187:1 gene:ENSMUSG00000059883.17 transcript:ENSMUST00000074936.10 gene_biotype:protein_coding transcript_biotype:protein_coding gene_symbol:Irak4 description:interleukin-1 receptor-associated kinase 4 [Source:MGI Symbol;Acc:MGI:2182474]	8	4	4	4	459	50.8	5.4	0.988157	1.33607	0.7396	0.0266292
ENSMUSP00000000776	tubulin, gamma complex associated protein 3	Tubgcp3	pep chromosome:GRCm39:8:12664277:12722248:-1 gene:ENSMUSG00000000759.15 transcript:ENSMUST00000000776.15 gene_biotype:protein_coding transcript_biotype:protein_coding gene_symbol:Tubgcp3 description:tubulin, gamma complex associated protein 3 [Source:MGI Symbol;Acc:MGI:2183752]	1	1	1	1	905	103.4	8.32	0.833434	1.12748	0.739201	0.0263649
ENSMUSP00000123803	capping protein inhibiting regulator of actin like	Cracdl	pep chromosome:GRCm39:1:37650758:37759166:-1 gene:ENSMUSG00000026090.17 transcript:ENSMUST00000162875.8 gene_biotype:protein_coding transcript_biotype:protein_coding gene_symbol:Cracdl description:capping protein inhibiting regulator of actin like [Source:MGI Symbol;Acc:MGI:1919347]	1	1	2	4	1175	125.8	7.37	1.11018	1.50254	0.738869	0.0261468
ENSMUSP00000059192	minichromosome maintenance complex component 3	Mcm3	pep chromosome:GRCm39:1:20873192:20890536:-1 gene:ENSMUSG00000041859.11 transcript:ENSMUST00000053266.11 gene_biotype:protein_coding transcript_biotype:protein_coding gene_symbol:Mcm3 description:minichromosome maintenance complex component 3 [Source:MGI Symbol;Acc:MGI:101845]	14	11	11	14	812	91.5	5.55	0.851165	1.15257	0.738495	0.0259032
ENSMUSP00000005611	myosin, light chain 10, regulatory	Myl10	pep chromosome:GRCm39:5:136722032:136729846:1 gene:ENSMUSG00000005474.10 transcript:ENSMUST00000005611.10 gene_biotype:protein_coding transcript_biotype:protein_coding gene_symbol:Myl10 description:myosin, light chain 10, regulatory [Source:MGI Symbol;Acc:MGI:1891705]	7	1	1	1	147	16.9	4.7	0.826003	1.11858	0.738438	0.0258657
ENSMUSP00000037028	calcium/calmodulin-dependent protein kinase ID	Camk1d	pep chromosome:GRCm39:2:5298268:5719326:-1 gene:ENSMUSG00000039145.17 transcript:ENSMUST00000044009.14 gene_biotype:protein_coding transcript_biotype:protein_coding gene_symbol:Camk1d description:calcium/calmodulin-dependent protein kinase ID [Source:MGI Symbol;Acc:MGI:2442190]	6	2	2	2	385	42.9	7.17	0.480703	0.651143	0.738245	0.0257409
ENSMUSP00000122456	small nuclear RNA activating complex, polypeptide 4	Snapc4	pep chromosome:GRCm39:2:26259469:26263643:-1 gene:ENSMUSG00000036281.14 transcript:ENSMUST00000123934.2 gene_biotype:protein_coding transcript_biotype:protein_coding gene_symbol:Snapc4 description:small nuclear RNA activating complex, polypeptide 4 [Source:MGI Symbol;Acc:MGI:2443935]	3	1	1	2	254	29.5	9.58	1.52033	2.06323	0.736868	0.0248627
ENSMUSP00000043041	abhydrolase domain containing 11	Abhd11	pep chromosome:GRCm39:5:135038153:135041029:1 gene:ENSMUSG00000040532.15 transcript:ENSMUST00000046999.12 gene_biotype:protein_coding transcript_biotype:protein_coding gene_symbol:Abhd11 description:abhydrolase domain containing 11 [Source:MGI Symbol;Acc:MGI:1916008]	10	3	4	5	307	33.5	9.61	1.06401	1.44468	0.736499	0.0246317
ENSMUSP00000033282	BRCA2 and CDKN1A interacting protein	Bccip	pep chromosome:GRCm39:7:133311062:133322874:1 gene:ENSMUSG00000030983.5 transcript:ENSMUST00000033282.5 gene_biotype:protein_coding transcript_biotype:protein_coding gene_symbol:Bccip description:BRCA2 and CDKN1A interacting protein [Source:MGI Symbol;Acc:MGI:1913415]	4	1	1	1	316	35.9	4.45	0.834112	1.13294	0.736239	0.0244697
ENSMUSP00000022429	ADP-ribosylation factor 4	Arf4	pep chromosome:GRCm39:14:26359229:26378413:1 gene:ENSMUSG00000021877.13 transcript:ENSMUST00000022429.9 gene_biotype:protein_coding transcript_biotype:protein_coding gene_symbol:Arf4 description:ADP-ribosylation factor 4 [Source:MGI Symbol;Acc:MGI:99433]	35	3	6	13	180	20.4	7.14	0.975768	1.3267	0.735482	0.0240036
ENSMUSP00000125398	FXYD domain-containing ion transport regulator 5	Fxyd5	pep chromosome:GRCm39:7:30732147:30741264:-1 gene:ENSMUSG00000009687.15 transcript:ENSMUST00000161805.8 gene_biotype:protein_coding transcript_biotype:protein_coding gene_symbol:Fxyd5 description:FXYD domain-containing ion transport regulator 5 [Source:MGI Symbol;Acc:MGI:1201785]	29	4	4	5	178	19.4	8.95	0.904119	1.22965	0.735263	0.0238697
ENSMUSP00000032228	murinoglobulin 1	Mug1	pep chromosome:GRCm39:6:121815500:121866016:1 gene:ENSMUSG00000059908.10 transcript:ENSMUST00000032228.9 gene_biotype:protein_coding transcript_biotype:protein_coding gene_symbol:Mug1 description:murinoglobulin 1 [Source:MGI Symbol;Acc:MGI:99837]	1	1	1	1	1476	165.2	6.42	1.18787	1.61634	0.73491	0.0236561
ENSMUSP00000090897	hemoglobin alpha, adult chain 1	Hba-a1	pep chromosome:GRCm39:11:32233511:32234465:1 gene:ENSMUSG00000069919.8 transcript:ENSMUST00000093209.4 gene_biotype:protein_coding transcript_biotype:protein_coding gene_symbol:Hba-a1 description:hemoglobin alpha, adult chain 1 [Source:MGI Symbol;Acc:MGI:96015]	30	4	4	9	142	15.1	8.22	0.841492	1.1465	0.733968	0.023093
ENSMUSP00000027966	Fc receptor, IgG, low affinity IIb	Fcgr2b	pep chromosome:GRCm39:1:170786186:170803696:-1 gene:ENSMUSG00000026656.16 transcript:ENSMUST00000027966.14 gene_biotype:protein_coding transcript_biotype:protein_coding gene_symbol:Fcgr2b description:Fc receptor, IgG, low affinity IIb [Source:MGI Symbol;Acc:MGI:95499]	14	1	5	13	340	37.8	6.73	0.885431	1.2086	0.732606	0.0222977
ENSMUSP00000061305	F-box and leucine-rich repeat protein 7	Fbxl7	pep chromosome:GRCm39:15:26540545:26895666:-1 gene:ENSMUSG00000043556.11 transcript:ENSMUST00000059204.11 gene_biotype:protein_coding transcript_biotype:protein_coding gene_symbol:Fbxl7 description:F-box and leucine-rich repeat protein 7 [Source:MGI Symbol;Acc:MGI:3052506]	1	1	1	2	491	54.6	8.28	0.753359	1.02849	0.732491	0.0222314
ENSMUSP00000113761	programmed cell death 5	Pdcd5	pep chromosome:GRCm39:7:35341407:35346946:-1 gene:ENSMUSG00000030417.16 transcript:ENSMUST00000118501.8 gene_biotype:protein_coding transcript_biotype:protein_coding gene_symbol:Pdcd5 description:programmed cell death 5 [Source:MGI Symbol;Acc:MGI:1913538]	30	4	4	6	126	14.3	5.68	0.753214	1.02897	0.732008	0.021956
ENSMUSP00000110091	chromobox 3	Cbx3	pep chromosome:GRCm39:6:51447340:51460013:1 gene:ENSMUSG00000029836.16 transcript:ENSMUST00000094623.10 gene_biotype:protein_coding transcript_biotype:protein_coding gene_symbol:Cbx3 description:chromobox 3 [Source:MGI Symbol;Acc:MGI:108515]	27	6	6	14	183	20.8	5.33	0.989153	1.35195	0.731647	0.0217515
ENSMUSP00000021970	chemokine (C-X-C motif) ligand 14	Cxcl14	pep chromosome:GRCm39:13:56436456:56444364:-1 gene:ENSMUSG00000021508.12 transcript:ENSMUST00000021970.11 gene_biotype:protein_coding transcript_biotype:protein_coding gene_symbol:Cxcl14 description:chemokine (C-X-C motif) ligand 14 [Source:MGI Symbol;Acc:MGI:1888514]	17	2	2	2	99	11.7	9.88	1.10718	1.5142	0.731196	0.0214982
ENSMUSP00000039110	serpine1 mRNA binding protein 1	Serbp1	pep chromosome:GRCm39:6:67243608:67274720:1 gene:ENSMUSG00000036371.7 transcript:ENSMUST00000042990.7 gene_biotype:protein_coding transcript_biotype:protein_coding gene_symbol:Serbp1 description:serpine1 mRNA binding protein 1 [Source:MGI Symbol;Acc:MGI:1914120]	18	7	7	9	407	44.7	8.54	1.03242	1.41227	0.73104	0.0214112
ENSMUSP00000021676	ergosterol biosynthesis 28	Erg28	pep chromosome:GRCm39:12:85862222:85871296:-1 gene:ENSMUSG00000021252.12 transcript:ENSMUST00000021676.12 gene_biotype:protein_coding transcript_biotype:protein_coding gene_symbol:Erg28 description:ergosterol biosynthesis 28 [Source:MGI Symbol;Acc:MGI:1915571]	6	1	1	2	140	15.8	9.91	1.02838	1.40679	0.731015	0.0213976
ENSMUSP00000056715	ataxin 2	Atxn2	pep chromosome:GRCm39:5:121849672:121953013:1 gene:ENSMUSG00000042605.17 transcript:ENSMUST00000051950.14 gene_biotype:protein_coding transcript_biotype:protein_coding gene_symbol:Atxn2 description:ataxin 2 [Source:MGI Symbol;Acc:MGI:1277223]	1	1	1	1	1286	136.4	9.54	0.818326	1.12016	0.730544	0.0211368
ENSMUSP00000145872	inner membrane protein, mitochondrial	Immt	pep chromosome:GRCm39:6:71808416:71854369:1 gene:ENSMUSG00000052337.16 transcript:ENSMUST00000207003.2 gene_biotype:protein_coding transcript_biotype:nonsense_mediated_decay gene_symbol:Immt description:inner membrane protein, mitochondrial [Source:MGI Symbol;Acc:MGI:1923864]	53	1	27	53	488	53.7	8.66	1.05304	1.44184	0.730349	0.0210295
ENSMUSP00000086094	SWI/SNF related, matrix associated, actin dependent regulator of chromatin, subfamily c, member 1	Smarcc1	pep chromosome:GRCm39:9:109961048:110069246:1 gene:ENSMUSG00000032481.18 transcript:ENSMUST00000088716.12 gene_biotype:protein_coding transcript_biotype:protein_coding gene_symbol:Smarcc1 description:SWI/SNF related, matrix associated, actin dependent regulator of chromatin, subfamily c, member 1 [Source:MGI Symbol;Acc:MGI:1203524]	5	1	5	13	1104	122.8	5.73	1.16019	1.58961	0.72986	0.0207626
ENSMUSP00000077971	PHD finger protein 6	Phf6	pep chromosome:GRCm39:X:52001143:52045820:1 gene:ENSMUSG00000025626.17 transcript:ENSMUST00000078944.13 gene_biotype:protein_coding transcript_biotype:protein_coding gene_symbol:Phf6 description:PHD finger protein 6 [Source:MGI Symbol;Acc:MGI:1918248]	8	3	3	3	364	41.1	8.73	1.02856	1.40998	0.729484	0.0205594
ENSMUSP00000033427	SAM and SH3 domain containing 3	Sash3	pep chromosome:GRCm39:X:47235313:47250442:1 gene:ENSMUSG00000031101.7 transcript:ENSMUST00000033427.7 gene_biotype:protein_coding transcript_biotype:protein_coding gene_symbol:Sash3 description:SAM and SH3 domain containing 3 [Source:MGI Symbol;Acc:MGI:1921381]	5	2	2	2	380	41.6	5.22	0.851505	1.17028	0.727608	0.0195694
ENSMUSP00000022784	HAUS augmin-like complex, subunit 4	Haus4	pep chromosome:GRCm39:14:54779242:54791818:-1 gene:ENSMUSG00000022177.10 transcript:ENSMUST00000022784.9 gene_biotype:protein_coding transcript_biotype:protein_coding gene_symbol:Haus4 description:HAUS augmin-like complex, subunit 4 [Source:MGI Symbol;Acc:MGI:1261794]	2	1	1	1	363	42.2	5.81	1.20044	1.65	0.727538	0.0195333
ENSMUSP00000086987	small nuclear ribonucleoprotein polypeptide G	Snrpg	pep chromosome:GRCm39:6:86348286:86356310:1 gene:ENSMUSG00000057278.9 transcript:ENSMUST00000089558.7 gene_biotype:protein_coding transcript_biotype:protein_coding gene_symbol:Snrpg description:small nuclear ribonucleoprotein polypeptide G [Source:MGI Symbol;Acc:MGI:1915261]	34	3	3	7	76	8.5	8.88	0.990107	1.3614	0.727269	0.0193946
ENSMUSP00000042918	coiled-coil domain containing 115	Ccdc115	pep chromosome:GRCm39:1:34475751:34478753:-1 gene:ENSMUSG00000042111.10 transcript:ENSMUST00000042493.10 gene_biotype:protein_coding transcript_biotype:protein_coding gene_symbol:Ccdc115 description:coiled-coil domain containing 115 [Source:MGI Symbol;Acc:MGI:1916918]	43	7	7	7	180	19.7	8.81	1.01889	1.40669	0.724312	0.0179251
ENSMUSP00000095199	nuclear receptor subfamily 3, group C, member 1	Nr3c1	pep chromosome:GRCm39:18:39547535:39620285:-1 gene:ENSMUSG00000024431.16 transcript:ENSMUST00000097592.9 gene_biotype:protein_coding transcript_biotype:protein_coding gene_symbol:Nr3c1 description:nuclear receptor subfamily 3, group C, member 1 [Source:MGI Symbol;Acc:MGI:95824]	2	2	2	2	793	87.3	6.49	1.04676	1.4458	0.723999	0.0177748
ENSMUSP00000040307	mitogen-activated protein kinase kinase kinase 7	Map3k7	pep chromosome:GRCm39:4:31964097:32023467:1 gene:ENSMUSG00000028284.14 transcript:ENSMUST00000037607.11 gene_biotype:protein_coding transcript_biotype:protein_coding gene_symbol:Map3k7 description:mitogen-activated protein kinase kinase kinase 7 [Source:MGI Symbol;Acc:MGI:1346877]	2	1	1	1	606	67.2	7.11	0.98185	1.35641	0.723857	0.0177072
ENSMUSP00000125314	transmembrane protein 167	Tmem167	pep chromosome:GRCm39:13:90237242:90260376:1 gene:ENSMUSG00000012422.15 transcript:ENSMUST00000161568.8 gene_biotype:protein_coding transcript_biotype:protein_coding gene_symbol:Tmem167 description:transmembrane protein 167 [Source:MGI Symbol;Acc:MGI:1913324]	13	1	1	1	72	8.1	8.95	0.751623	1.03858	0.723703	0.0176338
ENSMUSP00000090059	serine and arginine-rich splicing factor 2	Srsf2	pep chromosome:GRCm39:11:116740727:116743920:-1 gene:ENSMUSG00000034120.19 transcript:ENSMUST00000092404.13 gene_biotype:protein_coding transcript_biotype:protein_coding gene_symbol:Srsf2 description:serine and arginine-rich splicing factor 2 [Source:MGI Symbol;Acc:MGI:98284]	14	3	3	6	221	25.5	11.85	0.878222	1.21558	0.722474	0.0170587
ENSMUSP00000150618	fidgetin-like 2	Fignl2	pep chromosome:GRCm39:15:100948075:100976448:-1 gene:ENSMUSG00000095440.3 transcript:ENSMUST00000213610.2 gene_biotype:protein_coding transcript_biotype:protein_coding gene_symbol:Fignl2 description:fidgetin-like 2 [Source:MGI Symbol;Acc:MGI:3646919]	1	1	1	1	644	65.9	6.62	0.839108	1.16198	0.722139	0.0169045
ENSMUSP00000143223	alpha-kinase 1	Alpk1	pep chromosome:GRCm39:3:127463959:127523220:-1 gene:ENSMUSG00000028028.12 transcript:ENSMUST00000198955.5 gene_biotype:protein_coding transcript_biotype:protein_coding gene_symbol:Alpk1 description:alpha-kinase 1 [Source:MGI Symbol;Acc:MGI:1918731]	1	1	1	1	1231	135.8	6.24	1.00306	1.3913	0.720952	0.0163675
ENSMUSP00000099879	RAN binding protein 17	Ranbp17	pep chromosome:GRCm39:11:33161795:33463746:-1 gene:ENSMUSG00000040594.20 transcript:ENSMUST00000102815.10 gene_biotype:protein_coding transcript_biotype:protein_coding gene_symbol:Ranbp17 description:RAN binding protein 17 [Source:MGI Symbol;Acc:MGI:1929706]	1	1	1	2	1088	124	6.38	1.05466	1.4635	0.720644	0.0162308
ENSMUSP00000042053	microtubule associated monooxygenase, calponin and LIM domain containing -like 1	Micall1	pep chromosome:GRCm39:15:78993164:79021100:1 gene:ENSMUSG00000033039.11 transcript:ENSMUST00000040320.10 gene_biotype:protein_coding transcript_biotype:protein_coding gene_symbol:Micall1 description:microtubule associated monooxygenase, calponin and LIM domain containing -like 1 [Source:MGI Symbol;Acc:MGI:105870]	2	2	2	2	870	94	6.68	1.1632	1.61785	0.718981	0.0155074
ENSMUSP00000085566	formin-like 3	Fmnl3	pep chromosome:GRCm39:15:99215106:99268363:-1 gene:ENSMUSG00000023008.19 transcript:ENSMUST00000088233.13 gene_biotype:protein_coding transcript_biotype:protein_coding gene_symbol:Fmnl3 description:formin-like 3 [Source:MGI Symbol;Acc:MGI:109569]	2	1	3	3	1028	117.1	6.67	0.914666	1.27506	0.717353	0.0148254
ENSMUSP00000101981	sulfotransferase family 1A, phenol-preferring, member 1	Sult1a1	pep chromosome:GRCm39:7:126272037:126275604:-1 gene:ENSMUSG00000030711.17 transcript:ENSMUST00000106373.9 gene_biotype:protein_coding transcript_biotype:protein_coding gene_symbol:Sult1a1 description:sulfotransferase family 1A, phenol-preferring, member 1 [Source:MGI Symbol;Acc:MGI:102896]	2	1	1	1	298	34.6	8.1	0.897954	1.2535	0.716357	0.014421
ENSMUSP00000026211	cytochrome P450, family 2, subfamily c, polypeptide 23	Cyp2c23	pep chromosome:GRCm39:19:43993461:44017638:-1 gene:ENSMUSG00000025197.10 transcript:ENSMUST00000026211.10 gene_biotype:protein_coding transcript_biotype:protein_coding gene_symbol:Cyp2c23 description:cytochrome P450, family 2, subfamily c, polypeptide 23 [Source:MGI Symbol;Acc:MGI:1888897]	2	1	1	1	494	56.4	8.47	0.726415	1.01407	0.71634	0.014414
ENSMUSP00000087485	guanine nucleotide binding protein (G protein), gamma 5	Gng5	pep chromosome:GRCm39:3:146205562:146211327:1 gene:ENSMUSG00000068523.13 transcript:ENSMUST00000090031.12 gene_biotype:protein_coding transcript_biotype:protein_coding gene_symbol:Gng5 description:guanine nucleotide binding protein (G protein), gamma 5 [Source:MGI Symbol;Acc:MGI:109164]	24	2	2	3	68	7.3	9.85	1.22765	1.71395	0.716268	0.0143853
ENSMUSP00000022787	solute carrier family 7 (cationic amino acid transporter, y+ system), member 8	Slc7a8	pep chromosome:GRCm39:14:54959666:55019387:-1 gene:ENSMUSG00000022180.8 transcript:ENSMUST00000022787.8 gene_biotype:protein_coding transcript_biotype:protein_coding gene_symbol:Slc7a8 description:solute carrier family 7 (cationic amino acid transporter, y+ system), member 8 [Source:MGI Symbol;Acc:MGI:1355323]	15	7	7	9	531	57.8	6.67	1.04076	1.45367	0.715951	0.0142584
ENSMUSP00000127368	C2 calcium-dependent domain containing 2	C2cd2	pep chromosome:GRCm39:16:97656409:97723833:-1 gene:ENSMUSG00000045975.9 transcript:ENSMUST00000170757.3 gene_biotype:protein_coding transcript_biotype:protein_coding gene_symbol:C2cd2 description:C2 calcium-dependent domain containing 2 [Source:MGI Symbol;Acc:MGI:1891883]	1	1	1	1	696	76.5	7.72	1.05786	1.47939	0.715063	0.0139088
ENSMUSP00000099824	CDKN2A interacting protein N-terminal like	Cdkn2aipnl	pep chromosome:GRCm39:11:51858488:51868161:1 gene:ENSMUSG00000020392.9 transcript:ENSMUST00000102763.5 gene_biotype:protein_coding transcript_biotype:protein_coding gene_symbol:Cdkn2aipnl description:CDKN2A interacting protein N-terminal like [Source:MGI Symbol;Acc:MGI:1261797]	6	1	1	1	116	13.2	5.29	0.909656	1.27285	0.714662	0.0137532
ENSMUSP00000006625	RNA binding motif protein 14	Rbm14	pep chromosome:GRCm39:19:4850597:4861662:-1 gene:ENSMUSG00000006456.11 transcript:ENSMUST00000006625.8 gene_biotype:protein_coding transcript_biotype:protein_coding gene_symbol:Rbm14 description:RNA binding motif protein 14 [Source:MGI Symbol;Acc:MGI:1929092]	10	3	7	9	669	69.4	9.67	1.18819	1.66428	0.713933	0.013474
ENSMUSP00000154338	TSC complex subunit 2	Tsc2	pep chromosome:GRCm39:17:24815495:24851569:-1 gene:ENSMUSG00000002496.11 transcript:ENSMUST00000227745.2 gene_biotype:protein_coding transcript_biotype:protein_coding gene_symbol:Tsc2 description:TSC complex subunit 2 [Source:MGI Symbol;Acc:MGI:102548]	0	1	1	1	1808	201.2	7.09	0.844172	1.18431	0.712797	0.0130485
ENSMUSP00000046530	inter-alpha trypsin inhibitor, heavy chain 2	Itih2	pep chromosome:GRCm39:2:10099404:10135474:-1 gene:ENSMUSG00000037254.19 transcript:ENSMUST00000042290.14 gene_biotype:protein_coding transcript_biotype:protein_coding gene_symbol:Itih2 description:inter-alpha trypsin inhibitor, heavy chain 2 [Source:MGI Symbol;Acc:MGI:96619]	5	6	6	8	950	106.3	7.4	0.960517	1.34775	0.71268	0.0130051
ENSMUSP00000126067	synuclein, alpha	Snca	pep chromosome:GRCm39:6:60708559:60806839:-1 gene:ENSMUSG00000025889.14 transcript:ENSMUST00000163779.8 gene_biotype:protein_coding transcript_biotype:protein_coding gene_symbol:Snca description:synuclein, alpha [Source:MGI Symbol;Acc:MGI:1277151]	11	1	1	1	140	14.5	4.77	0.95398	1.33921	0.712346	0.0128826
ENSMUSP00000022830	receptor-interacting serine-threonine kinase 3	Ripk3	pep chromosome:GRCm39:14:56022452:56026322:-1 gene:ENSMUSG00000022221.15 transcript:ENSMUST00000022830.14 gene_biotype:protein_coding transcript_biotype:protein_coding gene_symbol:Ripk3 description:receptor-interacting serine-threonine kinase 3 [Source:MGI Symbol;Acc:MGI:2154952]	5	3	3	3	486	53.3	7.53	0.826178	1.15996	0.712248	0.0128468
ENSMUSP00000152434	G protein-coupled receptor 137B	Gpr137b	pep chromosome:GRCm39:13:13533020:13568149:-1 gene:ENSMUSG00000021306.12 transcript:ENSMUST00000223093.2 gene_biotype:protein_coding transcript_biotype:nonsense_mediated_decay gene_symbol:Gpr137b description:G protein-coupled receptor 137B [Source:MGI Symbol;Acc:MGI:1891463]	2	1	1	2	393	45.1	8.82	1.01749	1.42974	0.711661	0.0126342
ENSMUSP00000036240	polypeptide N-acetylgalactosaminyltransferase 11	Galnt11	pep chromosome:GRCm39:5:25427880:25470916:1 gene:ENSMUSG00000038072.15 transcript:ENSMUST00000045737.14 gene_biotype:protein_coding transcript_biotype:protein_coding gene_symbol:Galnt11 description:polypeptide N-acetylgalactosaminyltransferase 11 [Source:MGI Symbol;Acc:MGI:2444392]	1	1	1	2	608	69.2	8.44	0.608198	0.854693	0.711599	0.0126117
ENSMUSP00000046199	stabilin 1	Stab1	pep chromosome:GRCm39:14:30860970:30890598:-1 gene:ENSMUSG00000042286.14 transcript:ENSMUST00000036618.14 gene_biotype:protein_coding transcript_biotype:protein_coding gene_symbol:Stab1 description:stabilin 1 [Source:MGI Symbol;Acc:MGI:2178742]	12	24	24	38	2571	276.3	6.61	0.654789	0.920883	0.711045	0.0124142
ENSMUSP00000083810	myosin XVIIIb	Myo18b	pep chromosome:GRCm39:5:112836742:113044228:-1 gene:ENSMUSG00000072720.10 transcript:ENSMUST00000086617.11 gene_biotype:protein_coding transcript_biotype:protein_coding gene_symbol:Myo18b description:myosin XVIIIb [Source:MGI Symbol;Acc:MGI:1921626]	0	1	1	1	2605	288.7	6.67	0.92882	1.30637	0.710992	0.0123954
ENSMUSP00000016396	ATP synthase, H+ transporting, mitochondrial F1 complex, epsilon subunit	Atp5e	pep chromosome:GRCm39:2:174302865:174305898:-1 gene:ENSMUSG00000016252.8 transcript:ENSMUST00000016396.8 gene_biotype:protein_coding transcript_biotype:protein_coding gene_symbol:Atp5e description:ATP synthase, H+ transporting, mitochondrial F1 complex, epsilon subunit [Source:MGI Symbol;Acc:MGI:1855697]	29	2	2	3	52	5.8	10.01	0.842757	1.18653	0.710268	0.0121411
ENSMUSP00000000769	serine (or cysteine) peptidase inhibitor, clade F, member 1	Serpinf1	pep chromosome:GRCm39:11:75300595:75313527:-1 gene:ENSMUSG00000000753.16 transcript:ENSMUST00000000769.14 gene_biotype:protein_coding transcript_biotype:protein_coding gene_symbol:Serpinf1 description:serine (or cysteine) peptidase inhibitor, clade F, member 1 [Source:MGI Symbol;Acc:MGI:108080]	2	1	1	1	417	46.2	6.98	0.887771	1.24995	0.710245	0.0121333
ENSMUSP00000137253	NOC2 like nucleolar associated transcriptional repressor	Noc2l	pep chromosome:GRCm39:4:156320467:156332073:1 gene:ENSMUSG00000095567.9 transcript:ENSMUST00000179543.8 gene_biotype:protein_coding transcript_biotype:protein_coding gene_symbol:Noc2l description:NOC2 like nucleolar associated transcriptional repressor [Source:MGI Symbol;Acc:MGI:1931051]	6	5	5	5	750	85.6	5.83	0.95988	1.35202	0.70996	0.0120345
ENSMUSP00000090121	CD300C molecule 2	Cd300c2	pep chromosome:GRCm39:11:114887547:114892706:-1 gene:ENSMUSG00000044811.14 transcript:ENSMUST00000092464.10 gene_biotype:protein_coding transcript_biotype:protein_coding gene_symbol:Cd300c2 description:CD300C molecule 2 [Source:MGI Symbol;Acc:MGI:2153249]	4	1	1	1	228	25.2	6.2	0.75076	1.05922	0.708786	0.0116347
ENSMUSP00000017332	cytochrome C oxidase assembly factor 3	Coa3	pep chromosome:GRCm39:11:101168794:101169940:-1 gene:ENSMUSG00000017188.4 transcript:ENSMUST00000017332.4 gene_biotype:protein_coding transcript_biotype:protein_coding gene_symbol:Coa3 description:cytochrome C oxidase assembly factor 3 [Source:MGI Symbol;Acc:MGI:1098757]	8	1	1	2	108	12	9.86	1.02998	1.45499	0.707898	0.0113394
ENSMUSP00000019064	chemokine (C-X-C motif) ligand 16	Cxcl16	pep chromosome:GRCm39:11:70344809:70350810:-1 gene:ENSMUSG00000018920.12 transcript:ENSMUST00000019064.9 gene_biotype:protein_coding transcript_biotype:protein_coding gene_symbol:Cxcl16 description:chemokine (C-X-C motif) ligand 16 [Source:MGI Symbol;Acc:MGI:1932682]	12	2	2	2	246	26.9	7.47	1.14889	1.62634	0.706425	0.0108642
ENSMUSP00000133302	apolipoprotein E	Apoe	pep chromosome:GRCm39:7:19430034:19433113:-1 gene:ENSMUSG00000002985.17 transcript:ENSMUST00000174064.9 gene_biotype:protein_coding transcript_biotype:protein_coding gene_symbol:Apoe description:apolipoprotein E [Source:MGI Symbol;Acc:MGI:88057]	40	13	13	36	311	35.8	5.68	0.977697	1.38894	0.703915	0.0100923
ENSMUSP00000074872	StAR-related lipid transfer (START) domain containing 5	Stard5	pep chromosome:GRCm39:7:83281167:83291536:1 gene:ENSMUSG00000046027.18 transcript:ENSMUST00000075418.15 gene_biotype:protein_coding transcript_biotype:protein_coding gene_symbol:Stard5 description:StAR-related lipid transfer (START) domain containing 5 [Source:MGI Symbol;Acc:MGI:2156765]	4	1	1	1	213	23.9	6.39	0.92022	1.30884	0.703081	0.00984658
ENSMUSP00000115044	small ubiquitin-like modifier 2	Sumo2	pep chromosome:GRCm39:11:115413928:115427102:-1 gene:ENSMUSG00000020738.17 transcript:ENSMUST00000153892.2 gene_biotype:protein_coding transcript_biotype:protein_coding gene_symbol:Sumo2 description:small ubiquitin-like modifier 2 [Source:MGI Symbol;Acc:MGI:2158813]	23	1	2	6	95	10.9	5.5	0.867616	1.23529	0.702358	0.00963744
ENSMUSP00000097756	cytohesin 1	Cyth1	pep chromosome:GRCm39:11:118022845:118139328:-1 gene:ENSMUSG00000017132.18 transcript:ENSMUST00000100181.11 gene_biotype:protein_coding transcript_biotype:protein_coding gene_symbol:Cyth1 description:cytohesin 1 [Source:MGI Symbol;Acc:MGI:1334257]	7	3	3	3	460	52.5	5.2	0.783993	1.11677	0.702019	0.00954068
ENSMUSP00000048099	prolyl-tRNA synthetase domain containing 1	Prorsd1	pep chromosome:GRCm39:11:29462876:29465033:-1 gene:ENSMUSG00000032673.6 transcript:ENSMUST00000039900.4 gene_biotype:protein_coding transcript_biotype:protein_coding gene_symbol:Prorsd1 description:prolyl-tRNA synthetase domain containing 1 [Source:MGI Symbol;Acc:MGI:1915189]	4	1	1	1	169	18.9	6.14	0.851081	1.2128	0.701752	0.00946495
ENSMUSP00000061474	serine and arginine-rich splicing factor 4	Srsf4	pep chromosome:GRCm39:4:131600928:131629017:1 gene:ENSMUSG00000028911.17 transcript:ENSMUST00000053819.6 gene_biotype:protein_coding transcript_biotype:protein_coding gene_symbol:Srsf4 description:serine and arginine-rich splicing factor 4 [Source:MGI Symbol;Acc:MGI:1890577]	14	3	7	14	491	56.2	11.37	0.98166	1.4005	0.700934	0.00923649
ENSMUSP00000019470	proteaseome (prosome, macropain) activator subunit 3 (PA28 gamma, Ki)	Psme3	pep chromosome:GRCm39:11:101207039:101214363:1 gene:ENSMUSG00000078652.10 transcript:ENSMUST00000019470.14 gene_biotype:protein_coding transcript_biotype:protein_coding gene_symbol:Psme3 description:proteaseome (prosome, macropain) activator subunit 3 (PA28 gamma, Ki) [Source:MGI Symbol;Acc:MGI:1096366]	22	5	5	5	254	29.5	5.95	0.963578	1.37551	0.700525	0.00912388
ENSMUSP00000034460	component of oligomeric golgi complex 2	Cog2	pep chromosome:GRCm39:8:125247506:125278747:1 gene:ENSMUSG00000031979.18 transcript:ENSMUST00000034460.11 gene_biotype:protein_coding transcript_biotype:protein_coding gene_symbol:Cog2 description:component of oligomeric golgi complex 2 [Source:MGI Symbol;Acc:MGI:1923582]	5	4	4	5	731	82	6.21	0.956244	1.36559	0.700243	0.00904716
ENSMUSP00000007272	keratin 14	Krt14	pep chromosome:GRCm39:11:100093988:100098374:-1 gene:ENSMUSG00000045545.9 transcript:ENSMUST00000007272.8 gene_biotype:protein_coding transcript_biotype:protein_coding gene_symbol:Krt14 description:keratin 14 [Source:MGI Symbol;Acc:MGI:96688]	33	2	16	36	484	52.8	5.17	0.841296	1.20298	0.699341	0.00880492
ENSMUSP00000126284	general transcription factor II E, polypeptide 2 (beta subunit)	Gtf2e2	pep chromosome:GRCm39:8:34221861:34267192:1 gene:ENSMUSG00000031585.14 transcript:ENSMUST00000170705.8 gene_biotype:protein_coding transcript_biotype:protein_coding gene_symbol:Gtf2e2 description:general transcription factor II E, polypeptide 2 (beta subunit) [Source:MGI Symbol;Acc:MGI:1915403]	2	1	1	1	292	33	9.64	0.824954	1.18023	0.698976	0.00870846
ENSMUSP00000070073	predicted gene 14548	Gm14548	pep chromosome:GRCm39:7:3887241:3901119:-1 gene:ENSMUSG00000074417.10 transcript:ENSMUST00000070639.8 gene_biotype:protein_coding transcript_biotype:protein_coding gene_symbol:Gm14548 description:predicted gene 14548 [Source:MGI Symbol;Acc:MGI:3709645]	13	1	7	13	680	75.6	7.9	0.89671	1.28563	0.697485	0.00832346
ENSMUSP00000143522	S100 calcium binding protein A4	S100a4	pep chromosome:GRCm39:3:90512218:90513140:1 gene:ENSMUSG00000001020.9 transcript:ENSMUST00000142476.2 gene_biotype:protein_coding transcript_biotype:protein_coding gene_symbol:S100a4 description:S100 calcium binding protein A4 [Source:MGI Symbol;Acc:MGI:1330282]	49	5	5	16	78	9.1	5.21	0.873576	1.25329	0.697029	0.00820861
ENSMUSP00000021807	DEK proto-oncogene (DNA binding)	Dek	pep chromosome:GRCm39:13:47238258:47259666:-1 gene:ENSMUSG00000021377.16 transcript:ENSMUST00000021807.13 gene_biotype:protein_coding transcript_biotype:protein_coding gene_symbol:Dek description:DEK proto-oncogene (DNA binding) [Source:MGI Symbol;Acc:MGI:1926209]	29	13	13	21	380	43.1	6.86	0.921742	1.32357	0.696406	0.00805404
ENSMUSP00000020278	tachykinin receptor 2	Tacr2	pep chromosome:GRCm39:10:62088217:62101769:1 gene:ENSMUSG00000020081.6 transcript:ENSMUST00000020278.6 gene_biotype:protein_coding transcript_biotype:protein_coding gene_symbol:Tacr2 description:tachykinin receptor 2 [Source:MGI Symbol;Acc:MGI:98477]	2	1	1	1	384	43.1	8.68	1.03081	1.48261	0.695264	0.0077769
ENSMUSP00000033800	proteolipid protein (myelin) 1	Plp1	pep chromosome:GRCm39:X:135723420:135740482:1 gene:ENSMUSG00000031425.16 transcript:ENSMUST00000033800.13 gene_biotype:protein_coding transcript_biotype:protein_coding gene_symbol:Plp1 description:proteolipid protein (myelin) 1 [Source:MGI Symbol;Acc:MGI:97623]	8	2	2	4	277	30.1	8.35	0.902445	1.29875	0.694859	0.00768067
ENSMUSP00000078429	tubulin, alpha 4A	Tuba4a	pep chromosome:GRCm39:1:75191616:75195268:-1 gene:ENSMUSG00000026202.14 transcript:ENSMUST00000079464.13 gene_biotype:protein_coding transcript_biotype:protein_coding gene_symbol:Tuba4a description:tubulin, alpha 4A [Source:MGI Symbol;Acc:MGI:1095410]	42	2	16	41	477	52.9	5.19	0.985238	1.41929	0.694178	0.00752101
ENSMUSP00000103546	tropomyosin 2, beta	Tpm2	pep chromosome:GRCm39:4:43514712:43523388:-1 gene:ENSMUSG00000028464.17 transcript:ENSMUST00000107913.10 gene_biotype:protein_coding transcript_biotype:protein_coding gene_symbol:Tpm2 description:tropomyosin 2, beta [Source:MGI Symbol;Acc:MGI:98810]	18	1	7	13	284	32.8	4.7	0.700978	1.01019	0.693905	0.00745796
ENSMUSP00000115419	cytochrome c oxidase subunit 7C	Cox7c	pep chromosome:GRCm39:13:86192935:86195023:-1 gene:ENSMUSG00000017778.15 transcript:ENSMUST00000131011.2 gene_biotype:protein_coding transcript_biotype:protein_coding gene_symbol:Cox7c description:cytochrome c oxidase subunit 7C [Source:MGI Symbol;Acc:MGI:103226]	29	2	2	8	63	7.3	11	0.961383	1.38803	0.692622	0.00716685
ENSMUSP00000072092	thymopoietin	Tmpo	pep chromosome:GRCm39:10:90983433:91007444:-1 gene:ENSMUSG00000019961.18 transcript:ENSMUST00000072239.14 gene_biotype:protein_coding transcript_biotype:protein_coding gene_symbol:Tmpo description:thymopoietin [Source:MGI Symbol;Acc:MGI:106920]	12	2	5	11	452	50.3	9.45	0.858929	1.24055	0.692377	0.00711251
ENSMUSP00000023761	cytochrome c oxidase assembly protein 14	Cox14	pep chromosome:GRCm39:15:99623528:99627413:1 gene:ENSMUSG00000023020.4 transcript:ENSMUST00000023761.4 gene_biotype:protein_coding transcript_biotype:protein_coding gene_symbol:Cox14 description:cytochrome c oxidase assembly protein 14 [Source:MGI Symbol;Acc:MGI:1913629]	12	1	1	2	57	6.4	9.79	1.04024	1.50561	0.690906	0.00679277
ENSMUSP00000121309	splicing factor 1	Sf1	pep chromosome:GRCm39:19:6413720:6428060:1 gene:ENSMUSG00000024949.18 transcript:ENSMUST00000131252.8 gene_biotype:protein_coding transcript_biotype:protein_coding gene_symbol:Sf1 description:splicing factor 1 [Source:MGI Symbol;Acc:MGI:1095403]	7	5	5	10	639	68.3	8.98	1.00507	1.45692	0.689862	0.00657345
ENSMUSP00000003521	ribosomal protein S11	Rps11	pep chromosome:GRCm39:7:44771803:44773863:-1 gene:ENSMUSG00000003429.12 transcript:ENSMUST00000003521.10 gene_biotype:protein_coding transcript_biotype:protein_coding gene_symbol:Rps11 description:ribosomal protein S11 [Source:MGI Symbol;Acc:MGI:1351329]	49	9	9	14	158	18.4	10.3	0.947943	1.37413	0.689849	0.00657078
ENSMUSP00000022576	carboxypeptidase B2 (plasma)	Cpb2	pep chromosome:GRCm39:14:75479727:75520995:1 gene:ENSMUSG00000021999.10 transcript:ENSMUST00000022576.10 gene_biotype:protein_coding transcript_biotype:protein_coding gene_symbol:Cpb2 description:carboxypeptidase B2 (plasma) [Source:MGI Symbol;Acc:MGI:1891837]	3	2	2	3	422	48.8	7.97	0.903468	1.30982	0.689766	0.00655365
ENSMUSP00000023693	interferon (alpha and beta) receptor 2	Ifnar2	pep chromosome:GRCm39:16:91169671:91202477:1 gene:ENSMUSG00000022971.19 transcript:ENSMUST00000023693.14 gene_biotype:protein_coding transcript_biotype:protein_coding gene_symbol:Ifnar2 description:interferon (alpha and beta) receptor 2 [Source:MGI Symbol;Acc:MGI:1098243]	5	3	3	3	513	56.5	4.59	0.879491	1.27519	0.689696	0.0065392
ENSMUSP00000126961	mitogen-activated protein kinase kinase kinase kinase 4	Map4k4	pep chromosome:GRCm39:1:39940073:40065470:1 gene:ENSMUSG00000026074.16 transcript:ENSMUST00000163854.9 gene_biotype:protein_coding transcript_biotype:protein_coding gene_symbol:Map4k4 description:mitogen-activated protein kinase kinase kinase kinase 4 [Source:MGI Symbol;Acc:MGI:1349394]	4	2	6	7	1288	146.6	7.58	0.886966	1.28668	0.689345	0.00646713
ENSMUSP00000032194	basic helix-loop-helix family, member e40	Bhlhe40	pep chromosome:GRCm39:6:108637590:108643886:1 gene:ENSMUSG00000030103.12 transcript:ENSMUST00000032194.11 gene_biotype:protein_coding transcript_biotype:protein_coding gene_symbol:Bhlhe40 description:basic helix-loop-helix family, member e40 [Source:MGI Symbol;Acc:MGI:1097714]	2	1	1	1	411	45.3	7.97	0.813899	1.18099	0.689166	0.00643077
ENSMUSP00000099617	nitric oxide synthase 1, neuronal	Nos1	pep chromosome:GRCm39:5:118005179:118091974:1 gene:ENSMUSG00000029361.19 transcript:ENSMUST00000102557.10 gene_biotype:protein_coding transcript_biotype:protein_coding gene_symbol:Nos1 description:nitric oxide synthase 1, neuronal [Source:MGI Symbol;Acc:MGI:97360]	1	1	1	1	1463	164.2	7.24	1.09673	1.59164	0.689055	0.00640806
ENSMUSP00000029717	CD1d1 antigen	Cd1d1	pep chromosome:GRCm39:3:86903141:86906748:-1 gene:ENSMUSG00000028076.13 transcript:ENSMUST00000029717.4 gene_biotype:protein_coding transcript_biotype:protein_coding gene_symbol:Cd1d1 description:CD1d1 antigen [Source:MGI Symbol;Acc:MGI:107674]	2	1	1	2	336	38.6	7.49	1.11008	1.6112	0.688978	0.00639247
ENSMUSP00000030636	stathmin 1	Stmn1	pep chromosome:GRCm39:4:134195631:134201154:1 gene:ENSMUSG00000028832.12 transcript:ENSMUST00000030636.11 gene_biotype:protein_coding transcript_biotype:protein_coding gene_symbol:Stmn1 description:stathmin 1 [Source:MGI Symbol;Acc:MGI:96739]	39	6	6	9	149	17.3	5.97	0.851756	1.24061	0.686564	0.00591995
ENSMUSP00000122787	sialophorin	Spn	pep chromosome:GRCm39:7:126731404:126736986:-1 gene:ENSMUSG00000051457.8 transcript:ENSMUST00000143713.2 gene_biotype:protein_coding transcript_biotype:nonsense_mediated_decay gene_symbol:Spn description:sialophorin [Source:MGI Symbol;Acc:MGI:98384]	7	2	2	4	395	40	4.96	0.886275	1.29293	0.68548	0.00571761
ENSMUSP00000102213	ribosomal protein L38	Rpl38	pep chromosome:GRCm39:11:114559350:114563157:1 gene:ENSMUSG00000057322.13 transcript:ENSMUST00000106602.10 gene_biotype:protein_coding transcript_biotype:protein_coding gene_symbol:Rpl38 description:ribosomal protein L38 [Source:MGI Symbol;Acc:MGI:1914921]	24	2	2	9	70	8.2	10.1	0.818881	1.19777	0.683673	0.0053935
ENSMUSP00000113537	family with sequence similarity 118, member B	Fam118b	pep chromosome:GRCm39:9:35128316:35179073:-1 gene:ENSMUSG00000050471.18 transcript:ENSMUST00000121564.8 gene_biotype:protein_coding transcript_biotype:protein_coding gene_symbol:Fam118b description:family with sequence similarity 118, member B [Source:MGI Symbol;Acc:MGI:1924483]	3	1	1	1	351	39.5	6.86	0.813471	1.19025	0.683445	0.00535386
ENSMUSP00000106250	ribosomal protein L36A-like	Rpl36al	pep chromosome:GRCm39:12:69229505:69230760:-1 gene:ENSMUSG00000049751.7 transcript:ENSMUST00000110620.2 gene_biotype:protein_coding transcript_biotype:protein_coding gene_symbol:Rpl36al description:ribosomal protein L36A-like [Source:MGI Symbol;Acc:MGI:1913733]	26	5	5	9	106	12.4	10.58	0.958283	1.40353	0.682765	0.00523676
ENSMUSP00000145451	zyxin	Zyx	pep chromosome:GRCm39:6:42326762:42335496:1 gene:ENSMUSG00000029860.17 transcript:ENSMUST00000203652.3 gene_biotype:protein_coding transcript_biotype:protein_coding gene_symbol:Zyx description:zyxin [Source:MGI Symbol;Acc:MGI:103072]	2	1	1	2	564	60.5	6.4	0.973844	1.42655	0.682656	0.00521817
ENSMUSP00000112213	WW domain binding protein 11	Wbp11	pep chromosome:GRCm39:6:136790652:136805231:-1 gene:ENSMUSG00000030216.13 transcript:ENSMUST00000116514.4 gene_biotype:protein_coding transcript_biotype:protein_coding gene_symbol:Wbp11 description:WW domain binding protein 11 [Source:MGI Symbol;Acc:MGI:1891823]	1	1	1	1	641	69.8	8.4	0.85271	1.25139	0.681411	0.00501021
ENSMUSP00000039420	general transcription factor IIIC, polypeptide 3	Gtf3c3	pep chromosome:GRCm39:1:54435163:54478130:-1 gene:ENSMUSG00000041303.8 transcript:ENSMUST00000041638.8 gene_biotype:protein_coding transcript_biotype:protein_coding gene_symbol:Gtf3c3 description:general transcription factor IIIC, polypeptide 3 [Source:MGI Symbol;Acc:MGI:2138383]	2	2	2	2	882	100.6	5.15	0.909179	1.33494	0.681061	0.00495301
ENSMUSP00000028515	cholinergic receptor, nicotinic, alpha polypeptide 1 (muscle)	Chrna1	pep chromosome:GRCm39:2:73393559:73410682:-1 gene:ENSMUSG00000027107.4 transcript:ENSMUST00000028515.4 gene_biotype:protein_coding transcript_biotype:protein_coding gene_symbol:Chrna1 description:cholinergic receptor, nicotinic, alpha polypeptide 1 (muscle) [Source:MGI Symbol;Acc:MGI:87885]	3	2	2	2	457	51.9	5.97	0.83067	1.2197	0.681046	0.00495061
ENSMUSP00000000505	minichromosome maintenance complex component 7	Mcm7	pep chromosome:GRCm39:5:138162845:138170684:-1 gene:ENSMUSG00000029730.17 transcript:ENSMUST00000000505.16 gene_biotype:protein_coding transcript_biotype:protein_coding gene_symbol:Mcm7 description:minichromosome maintenance complex component 7 [Source:MGI Symbol;Acc:MGI:1298398]	6	5	5	5	719	81.2	6.37	0.996747	1.46421	0.680739	0.00490093
ENSMUSP00000056691	PRAME like 32	Pramel32	pep chromosome:GRCm39:4:88545557:88552496:-1 gene:ENSMUSG00000038330.11 transcript:ENSMUST00000053304.10 gene_biotype:protein_coding transcript_biotype:protein_coding gene_symbol:Pramel32 description:PRAME like 32 [Source:MGI Symbol;Acc:MGI:2140706]	2	1	1	1	493	57.4	6.13	0.982525	1.44354	0.680636	0.00488428
ENSMUSP00000065922	keratin 72	Krt72	pep chromosome:GRCm39:15:101684607:101694895:-1 gene:ENSMUSG00000056605.8 transcript:ENSMUST00000071104.6 gene_biotype:protein_coding transcript_biotype:protein_coding gene_symbol:Krt72 description:keratin 72 [Source:MGI Symbol;Acc:MGI:2146034]	6	1	4	16	520	56.7	7.4	0.998886	1.46775	0.680557	0.0048717
ENSMUSP00000121736	proline dehydrogenase	Prodh	pep chromosome:GRCm39:16:17890120:17897806:-1 gene:ENSMUSG00000003526.13 transcript:ENSMUST00000126087.2 gene_biotype:protein_coding transcript_biotype:protein_coding gene_symbol:Prodh description:proline dehydrogenase [Source:MGI Symbol;Acc:MGI:97770]	9	1	2	2	244	27.8	6.54	1.10594	1.62645	0.679972	0.00477865
ENSMUSP00000035061	neutrophilic granule protein	Ngp	pep chromosome:GRCm39:9:110248815:110252080:1 gene:ENSMUSG00000032484.9 transcript:ENSMUST00000035061.9 gene_biotype:protein_coding transcript_biotype:protein_coding gene_symbol:Ngp description:neutrophilic granule protein [Source:MGI Symbol;Acc:MGI:105983]	29	4	4	4	167	19.3	5.31	0.536637	0.790759	0.678635	0.00457194
ENSMUSP00000015236	endothelial differentiation-related factor 1	Edf1	pep chromosome:GRCm39:2:25447859:25452094:1 gene:ENSMUSG00000015092.10 transcript:ENSMUST00000015236.4 gene_biotype:protein_coding transcript_biotype:protein_coding gene_symbol:Edf1 description:endothelial differentiation-related factor 1 [Source:MGI Symbol;Acc:MGI:1891227]	22	3	3	3	148	16.4	9.99	0.887299	1.30787	0.678433	0.00454129
ENSMUSP00000022704	integral membrane protein 2B	Itm2b	pep chromosome:GRCm39:14:73599666:73622729:-1 gene:ENSMUSG00000022108.9 transcript:ENSMUST00000022704.9 gene_biotype:protein_coding transcript_biotype:protein_coding gene_symbol:Itm2b description:integral membrane protein 2B [Source:MGI Symbol;Acc:MGI:1309517]	29	6	6	8	266	30.2	5.3	0.972712	1.43576	0.677487	0.00440056
ENSMUSP00000109877	SAM domain, SH3 domain and nuclear localization signals, 1	Samsn1	pep chromosome:GRCm39:16:75655681:75706198:-1 gene:ENSMUSG00000022876.19 transcript:ENSMUST00000114239.9 gene_biotype:protein_coding transcript_biotype:protein_coding gene_symbol:Samsn1 description:SAM domain, SH3 domain and nuclear localization signals, 1 [Source:MGI Symbol;Acc:MGI:1914992]	4	1	1	1	372	41.6	5.25	1.10571	1.63531	0.676146	0.00420737
ENSMUSP00000083204	coagulation factor V	F5	pep chromosome:GRCm39:1:163979407:164047846:1 gene:ENSMUSG00000026579.9 transcript:ENSMUST00000086040.6 gene_biotype:protein_coding transcript_biotype:protein_coding gene_symbol:F5 description:coagulation factor V [Source:MGI Symbol;Acc:MGI:88382]	3	9	9	16	2183	247.1	6.05	1.04828	1.55078	0.675969	0.00418245
ENSMUSP00000097754	keratin 76	Krt76	pep chromosome:GRCm39:15:101792786:101801355:-1 gene:ENSMUSG00000075402.2 transcript:ENSMUST00000100179.2 gene_biotype:protein_coding transcript_biotype:protein_coding gene_symbol:Krt76 description:keratin 76 [Source:MGI Symbol;Acc:MGI:1924305]	9	1	7	29	594	62.8	8.43	0.996726	1.47563	0.675458	0.00411124
ENSMUSP00000047333	zinc finger and BTB domain containing 7a	Zbtb7a	pep chromosome:GRCm39:10:80972105:80988056:1 gene:ENSMUSG00000035011.16 transcript:ENSMUST00000048128.15 gene_biotype:protein_coding transcript_biotype:protein_coding gene_symbol:Zbtb7a description:zinc finger and BTB domain containing 7a [Source:MGI Symbol;Acc:MGI:1335091]	3	2	2	2	569	60.2	5.12	1.04447	1.54778	0.674821	0.00402381
ENSMUSP00000038825	CBY1 interacting BAR domain containing 2	Cibar2	pep chromosome:GRCm39:8:120893136:120904205:-1 gene:ENSMUSG00000042269.16 transcript:ENSMUST00000048786.13 gene_biotype:protein_coding transcript_biotype:protein_coding gene_symbol:Cibar2 description:CBY1 interacting BAR domain containing 2 [Source:MGI Symbol;Acc:MGI:3588213]	2	1	1	1	292	33.3	6.11	1.01454	1.50448	0.674345	0.00395959
ENSMUSP00000023709	keratin 5	Krt5	pep chromosome:GRCm39:15:101615505:101621333:-1 gene:ENSMUSG00000061527.8 transcript:ENSMUST00000023709.7 gene_biotype:protein_coding transcript_biotype:protein_coding gene_symbol:Krt5 description:keratin 5 [Source:MGI Symbol;Acc:MGI:96702]	23	8	19	56	580	61.7	7.75	0.894366	1.3278	0.673569	0.00385675
ENSMUSP00000138025	sorting nexin 29	Snx29	pep chromosome:GRCm39:16:11140772:11573336:1 gene:ENSMUSG00000071669.15 transcript:ENSMUST00000180792.8 gene_biotype:protein_coding transcript_biotype:protein_coding gene_symbol:Snx29 description:sorting nexin 29 [Source:MGI Symbol;Acc:MGI:1921728]	3	3	3	3	818	91.3	6.13	0.824003	1.22625	0.671969	0.003652
ENSMUSP00000116252	glutamate-rich WD repeat containing 1	Grwd1	pep chromosome:GRCm39:7:45474647:45480368:-1 gene:ENSMUSG00000053801.19 transcript:ENSMUST00000131384.3 gene_biotype:protein_coding transcript_biotype:protein_coding gene_symbol:Grwd1 description:glutamate-rich WD repeat containing 1 [Source:MGI Symbol;Acc:MGI:2141989]	2	1	1	1	446	49.2	4.81	0.885616	1.32123	0.670297	0.00344811
ENSMUSP00000022345	DnaJ heat shock protein family (Hsp40) member C9	Dnajc9	pep chromosome:GRCm39:14:20434706:20438978:-1 gene:ENSMUSG00000021811.8 transcript:ENSMUST00000022345.7 gene_biotype:protein_coding transcript_biotype:protein_coding gene_symbol:Dnajc9 description:DnaJ heat shock protein family (Hsp40) member C9 [Source:MGI Symbol;Acc:MGI:1915326]	15	3	3	3	259	30	5.94	0.885554	1.32243	0.669642	0.00337103
ENSMUSP00000138308	dystonin	Dst	pep chromosome:GRCm39:1:33947306:34346673:1 gene:ENSMUSG00000026131.21 transcript:ENSMUST00000183034.5 gene_biotype:protein_coding transcript_biotype:protein_coding gene_symbol:Dst description:dystonin [Source:MGI Symbol;Acc:MGI:104627]	1	2	5	9	7717	870	5.45	0.674535	1.00764	0.669421	0.00334537
ENSMUSP00000083474	protein phosphatase 1 catalytic subunit gamma	Ppp1cc	pep chromosome:GRCm39:5:122296419:122313336:1 gene:ENSMUSG00000004455.17 transcript:ENSMUST00000086294.11 gene_biotype:protein_coding transcript_biotype:protein_coding gene_symbol:Ppp1cc description:protein phosphatase 1 catalytic subunit gamma [Source:MGI Symbol;Acc:MGI:104872]	41	1	11	29	337	38.5	6.13	0.889426	1.32879	0.669351	0.00333724
ENSMUSP00000036245	hydroxy-delta-5-steroid dehydrogenase, 3 beta- and steroid delta-isomerase 7	Hsd3b7	pep chromosome:GRCm39:7:127399776:127402974:1 gene:ENSMUSG00000042289.12 transcript:ENSMUST00000046863.12 gene_biotype:protein_coding transcript_biotype:protein_coding gene_symbol:Hsd3b7 description:hydroxy-delta-5-steroid dehydrogenase, 3 beta- and steroid delta-isomerase 7 [Source:MGI Symbol;Acc:MGI:2141879]	2	1	1	1	369	41.1	8.05	1.17107	1.75305	0.668021	0.00318652
ENSMUSP00000006353	CDK5 regulatory subunit associated protein 1-like 1	Cdkal1	pep chromosome:GRCm39:13:29509284:30039657:-1 gene:ENSMUSG00000006191.18 transcript:ENSMUST00000006353.14 gene_biotype:protein_coding transcript_biotype:protein_coding gene_symbol:Cdkal1 description:CDK5 regulatory subunit associated protein 1-like 1 [Source:MGI Symbol;Acc:MGI:1921765]	1	1	1	1	578	65.2	7.65	1.00735	1.50917	0.667483	0.00312729
ENSMUSP00000011450	SURP and G patch domain containing 1	Sugp1	pep chromosome:GRCm39:8:70495463:70524997:1 gene:ENSMUSG00000011306.8 transcript:ENSMUST00000011450.8 gene_biotype:protein_coding transcript_biotype:protein_coding gene_symbol:Sugp1 description:SURP and G patch domain containing 1 [Source:MGI Symbol;Acc:MGI:1917866]	4	2	2	2	643	72.6	7.64	0.809258	1.21912	0.663803	0.00274706
ENSMUSP00000131415	fatty acid binding protein 7, brain	Fabp7	pep chromosome:GRCm39:10:57661019:57662908:1 gene:ENSMUSG00000019874.12 transcript:ENSMUST00000165013.2 gene_biotype:protein_coding transcript_biotype:protein_coding gene_symbol:Fabp7 description:fatty acid binding protein 7, brain [Source:MGI Symbol;Acc:MGI:101916]	16	2	2	4	188	20.6	6.76	0.80207	1.2088	0.663523	0.00271989
ENSMUSP00000007317	keratin 19	Krt19	pep chromosome:GRCm39:11:100031636:100036946:-1 gene:ENSMUSG00000020911.15 transcript:ENSMUST00000007317.8 gene_biotype:protein_coding transcript_biotype:protein_coding gene_symbol:Krt19 description:keratin 19 [Source:MGI Symbol;Acc:MGI:96693]	17	2	9	23	403	44.5	5.39	0.808106	1.21868	0.663099	0.00267907
ENSMUSP00000120314	fibrous sheath-interacting protein 2	Fsip2	pep chromosome:GRCm39:2:82773978:82839281:1 gene:ENSMUSG00000075249.13 transcript:ENSMUST00000143764.9 gene_biotype:protein_coding transcript_biotype:protein_coding gene_symbol:Fsip2 description:fibrous sheath-interacting protein 2 [Source:MGI Symbol;Acc:MGI:2664111]	0	1	1	3	6995	784.4	6.51	0.958424	1.44786	0.661957	0.00257202
ENSMUSP00000031072	anaphase promoting complex subunit 4	Anapc4	pep chromosome:GRCm39:5:52991354:53025139:1 gene:ENSMUSG00000029176.14 transcript:ENSMUST00000031072.14 gene_biotype:protein_coding transcript_biotype:protein_coding gene_symbol:Anapc4 description:anaphase promoting complex subunit 4 [Source:MGI Symbol;Acc:MGI:1098673]	1	1	1	1	807	91.6	5.4	1.0389	1.5752	0.659531	0.00235674
ENSMUSP00000149022	olfactory receptor 703	Olfr703	pep chromosome:GRCm39:7:106442567:106445414:1 gene:ENSMUSG00000073901.5 transcript:ENSMUST00000216254.2 gene_biotype:protein_coding transcript_biotype:protein_coding gene_symbol:Olfr703 description:olfactory receptor 703 [Source:MGI Symbol;Acc:MGI:3030537]	2	1	1	1	319	35.5	7.9	0.899483	1.36535	0.658791	0.00229431
ENSMUSP00000023799	keratin 79	Krt79	pep chromosome:GRCm39:15:101837767:101848759:-1 gene:ENSMUSG00000061397.9 transcript:ENSMUST00000023799.8 gene_biotype:protein_coding transcript_biotype:protein_coding gene_symbol:Krt79 description:keratin 79 [Source:MGI Symbol;Acc:MGI:2385030]	9	1	7	25	531	57.5	7.69	0.665145	1.01283	0.656717	0.00212692
ENSMUSP00000124450	serine/arginine repetitive matrix 1	Srrm1	pep chromosome:GRCm39:4:135071839:135074515:-1 gene:ENSMUSG00000028809.17 transcript:ENSMUST00000136409.2 gene_biotype:protein_coding transcript_biotype:nonsense_mediated_decay gene_symbol:Srrm1 description:serine/arginine repetitive matrix 1 [Source:MGI Symbol;Acc:MGI:1858303]	11	1	2	2	140	16.2	5.38	0.953479	1.45552	0.655079	0.00200241
ENSMUSP00000091319	centrosomal protein 162	Cep162	pep chromosome:GRCm39:9:87071630:87137589:-1 gene:ENSMUSG00000056919.10 transcript:ENSMUST00000093802.6 gene_biotype:protein_coding transcript_biotype:protein_coding gene_symbol:Cep162 description:centrosomal protein 162 [Source:MGI Symbol;Acc:MGI:1925343]	1	1	1	1	1403	160.8	5.53	1.37279	2.10006	0.653691	0.00190191
ENSMUSP00000008748	ubiquilin 4	Ubqln4	pep chromosome:GRCm39:3:88461065:88477032:1 gene:ENSMUSG00000008604.12 transcript:ENSMUST00000008748.8 gene_biotype:protein_coding transcript_biotype:protein_coding gene_symbol:Ubqln4 description:ubiquilin 4 [Source:MGI Symbol;Acc:MGI:2150152]	2	1	1	1	596	63.5	5.03	0.990282	1.51651	0.653002	0.0018537
ENSMUSP00000053751	small proline-rich protein 1A	Sprr1a	pep chromosome:GRCm39:3:92391259:92393202:-1 gene:ENSMUSG00000050359.8 transcript:ENSMUST00000054599.8 gene_biotype:protein_coding transcript_biotype:protein_coding gene_symbol:Sprr1a description:small proline-rich protein 1A [Source:MGI Symbol;Acc:MGI:106660]	17	1	1	1	144	15.8	7.85	0.925624	1.41954	0.652058	0.00178939
ENSMUSP00000034026	hydroxyprostaglandin dehydrogenase 15 (NAD)	Hpgd	pep chromosome:GRCm39:8:56747620:56774078:1 gene:ENSMUSG00000031613.10 transcript:ENSMUST00000034026.10 gene_biotype:protein_coding transcript_biotype:protein_coding gene_symbol:Hpgd description:hydroxyprostaglandin dehydrogenase 15 (NAD) [Source:MGI Symbol;Acc:MGI:108085]	4	1	1	2	269	29.2	6.54	0.797297	1.2279	0.649317	0.00161364
ENSMUSP00000071130	arachidonate 5-lipoxygenase activating protein	Alox5ap	pep chromosome:GRCm39:5:149201577:149224963:1 gene:ENSMUSG00000060063.10 transcript:ENSMUST00000071130.5 gene_biotype:protein_coding transcript_biotype:protein_coding gene_symbol:Alox5ap description:arachidonate 5-lipoxygenase activating protein [Source:MGI Symbol;Acc:MGI:107505]	17	3	3	3	161	18.1	8.47	0.936293	1.44412	0.64835	0.00155537
ENSMUSP00000024706	phospholipase A2, group VII (platelet-activating factor acetylhydrolase, plasma)	Pla2g7	pep chromosome:GRCm39:17:43879160:43923092:1 gene:ENSMUSG00000023913.18 transcript:ENSMUST00000024706.12 gene_biotype:protein_coding transcript_biotype:protein_coding gene_symbol:Pla2g7 description:phospholipase A2, group VII (platelet-activating factor acetylhydrolase, plasma) [Source:MGI Symbol;Acc:MGI:1351327]	20	9	9	15	440	49.2	7.12	1.26997	1.95937	0.648151	0.00154358
ENSMUSP00000084257	exportin 5	Xpo5	pep chromosome:GRCm39:17:46513708:46554524:1 gene:ENSMUSG00000067150.7 transcript:ENSMUST00000087031.7 gene_biotype:protein_coding transcript_biotype:protein_coding gene_symbol:Xpo5 description:exportin 5 [Source:MGI Symbol;Acc:MGI:1913789]	6	6	6	6	1204	136.9	5.82	0.888837	1.37245	0.64763	0.00151315
ENSMUSP00000007280	keratin 16	Krt16	pep chromosome:GRCm39:11:100136917:100139728:-1 gene:ENSMUSG00000053797.11 transcript:ENSMUST00000007280.9 gene_biotype:protein_coding transcript_biotype:protein_coding gene_symbol:Krt16 description:keratin 16 [Source:MGI Symbol;Acc:MGI:96690]	20	4	10	22	469	51.6	5.2	0.883488	1.36454	0.647462	0.00150347
ENSMUSP00000027961	heat shock protein 14	Hspa14	pep chromosome:GRCm39:2:3489887:3513851:-1 gene:ENSMUSG00000109865.2 transcript:ENSMUST00000027961.12 gene_biotype:protein_coding transcript_biotype:protein_coding gene_symbol:Hspa14 description:heat shock protein 14 [Source:MGI Symbol;Acc:MGI:1354164]	10	5	5	5	509	54.6	5.92	0.812873	1.26184	0.644197	0.00132559
ENSMUSP00000088227	solute carrier family 43, member 3	Slc43a3	pep chromosome:GRCm39:2:84767008:84788853:1 gene:ENSMUSG00000027074.15 transcript:ENSMUST00000090726.6 gene_biotype:protein_coding transcript_biotype:protein_coding gene_symbol:Slc43a3 description:solute carrier family 43, member 3 [Source:MGI Symbol;Acc:MGI:1931054]	1	1	1	1	502	56	8.56	0.943804	1.4707	0.641736	0.00120409
ENSMUSP00000043245	ubiquitin associated domain containing 2	Ubac2	pep chromosome:GRCm39:14:122116032:122258446:1 gene:ENSMUSG00000041765.7 transcript:ENSMUST00000039803.7 gene_biotype:protein_coding transcript_biotype:protein_coding gene_symbol:Ubac2 description:ubiquitin associated domain containing 2 [Source:MGI Symbol;Acc:MGI:1916139]	5	2	2	2	345	39	9.44	0.779548	1.21496	0.641626	0.00119888
ENSMUSP00000047904	COX assembly mitochondrial protein 1	Cmc1	pep chromosome:GRCm39:9:117893590:117979245:-1 gene:ENSMUSG00000039163.11 transcript:ENSMUST00000044220.11 gene_biotype:protein_coding transcript_biotype:protein_coding gene_symbol:Cmc1 description:COX assembly mitochondrial protein 1 [Source:MGI Symbol;Acc:MGI:1915149]	25	2	2	2	106	12.5	8.24	0.935334	1.45873	0.641196	0.00117879
ENSMUSP00000133279	tet methylcytosine dioxygenase 1	Tet1	pep chromosome:GRCm39:10:62640356:62734897:-1 gene:ENSMUSG00000047146.18 transcript:ENSMUST00000174189.2 gene_biotype:protein_coding transcript_biotype:protein_coding gene_symbol:Tet1 description:tet methylcytosine dioxygenase 1 [Source:MGI Symbol;Acc:MGI:1098693]	1	1	1	2	2039	222.8	8.24	0.973433	1.52049	0.640211	0.00113379
ENSMUSP00000154853	ST3 beta-galactoside alpha-2,3-sialyltransferase 1	St3gal1	pep chromosome:GRCm39:15:66974724:67048679:-1 gene:ENSMUSG00000013846.11 transcript:ENSMUST00000229028.2 gene_biotype:protein_coding transcript_biotype:protein_coding gene_symbol:St3gal1 description:ST3 beta-galactoside alpha-2,3-sialyltransferase 1 [Source:MGI Symbol;Acc:MGI:98304]	7	2	2	2	337	39	9.23	1.03884	1.63382	0.635836	0.000951946
ENSMUSP00000102352	tripartite motif-containing 66	Trim66	pep chromosome:GRCm39:7:109052983:109107341:-1 gene:ENSMUSG00000031026.16 transcript:ENSMUST00000106741.10 gene_biotype:protein_coding transcript_biotype:protein_coding gene_symbol:Trim66 description:tripartite motif-containing 66 [Source:MGI Symbol;Acc:MGI:2152406]	1	1	1	1	1344	147.9	6.96	0.825896	1.29932	0.635637	0.000944313
ENSMUSP00000042987	ribosomal protein S6 kinase, polypeptide 5	Rps6ka5	pep chromosome:GRCm39:12:100516037:100691287:-1 gene:ENSMUSG00000021180.10 transcript:ENSMUST00000043599.7 gene_biotype:protein_coding transcript_biotype:protein_coding gene_symbol:Rps6ka5 description:ribosomal protein S6 kinase, polypeptide 5 [Source:MGI Symbol;Acc:MGI:1920336]	1	1	1	1	863	96.5	7.34	0.94249	1.49335	0.631126	0.000785542
ENSMUSP00000136323	shugoshin 2B	Sgo2b	pep chromosome:GRCm39:8:64377728:64405204:-1 gene:ENSMUSG00000094443.3 transcript:ENSMUST00000179944.2 gene_biotype:protein_coding transcript_biotype:protein_coding gene_symbol:Sgo2b description:shugoshin 2B [Source:MGI Symbol;Acc:MGI:3644562]	1	1	1	1	1167	130.4	8.5	0.816838	1.29706	0.62976	0.000742386
ENSMUSP00000017891	GH3 domain containing	Ghdc	pep chromosome:GRCm39:11:100656858:100661783:-1 gene:ENSMUSG00000017747.14 transcript:ENSMUST00000017891.14 gene_biotype:protein_coding transcript_biotype:protein_coding gene_symbol:Ghdc description:GH3 domain containing [Source:MGI Symbol;Acc:MGI:1931556]	8	4	4	4	532	58.5	7.56	0.893365	1.4193	0.62944	0.000732571
ENSMUSP00000152074	predicted gene, 20075	Gm20075	pep chromosome:GRCm39:13:96215724:96217884:-1 gene:ENSMUSG00000114133.2 transcript:ENSMUST00000220449.2 gene_biotype:protein_coding transcript_biotype:protein_coding gene_symbol:Gm20075 description:predicted gene, 20075 [Source:MGI Symbol;Acc:MGI:5012260]	23	2	4	4	158	17.3	6.35	0.820675	1.3057	0.628531	0.000705364
ENSMUSP00000028233	hemolytic complement	Hc	pep chromosome:GRCm39:2:34873343:34951450:-1 gene:ENSMUSG00000026874.11 transcript:ENSMUST00000028233.7 gene_biotype:protein_coding transcript_biotype:protein_coding gene_symbol:Hc description:hemolytic complement [Source:MGI Symbol;Acc:MGI:96031]	0	1	1	2	1680	188.8	6.81	1.00278	1.6039	0.625209	0.000613452
ENSMUSP00000003759	cytosolic iron-sulfur protein assembly 1	Ciao1	pep chromosome:GRCm39:2:127082858:127089736:-1 gene:ENSMUSG00000003662.11 transcript:ENSMUST00000003759.11 gene_biotype:protein_coding transcript_biotype:protein_coding gene_symbol:Ciao1 description:cytosolic iron-sulfur protein assembly 1 [Source:MGI Symbol;Acc:MGI:1346998]	8	2	2	2	339	37.6	4.88	0.754516	1.21237	0.622349	0.000543029
ENSMUSP00000129789	PYM homolog 1, exon junction complex associated factor	Pym1	pep chromosome:GRCm39:10:128583758:128602432:1 gene:ENSMUSG00000064030.16 transcript:ENSMUST00000163377.10 gene_biotype:protein_coding transcript_biotype:protein_coding gene_symbol:Pym1 description:PYM homolog 1, exon junction complex associated factor [Source:MGI Symbol;Acc:MGI:1925678]	9	2	2	2	203	22.7	9.5	0.661365	1.06939	0.618452	0.000458729
ENSMUSP00000072533	heterogeneous nuclear ribonucleoprotein D	Hnrnpd	pep chromosome:GRCm39:5:100108861:100126794:-1 gene:ENSMUSG00000000568.16 transcript:ENSMUST00000072750.13 gene_biotype:protein_coding transcript_biotype:protein_coding gene_symbol:Hnrnpd description:heterogeneous nuclear ribonucleoprotein D [Source:MGI Symbol;Acc:MGI:101947]	37	1	11	22	287	30.6	8.41	1.04389	1.7008	0.613765	0.000372991
ENSMUSP00000115229	family with sequence similarity 47, member E	Fam47e	pep chromosome:GRCm39:5:92702928:92738619:1 gene:ENSMUSG00000057068.16 transcript:ENSMUST00000146417.9 gene_biotype:protein_coding transcript_biotype:protein_coding gene_symbol:Fam47e description:family with sequence similarity 47, member E [Source:MGI Symbol;Acc:MGI:2686227]	2	1	1	1	402	46.4	9.38	0.950168	1.55285	0.611886	0.000342871
ENSMUSP00000022203	DIM1 dimethyladenosine transferase 1-like (S. cerevisiae)	Dimt1	pep chromosome:GRCm39:13:107083667:107096268:1 gene:ENSMUSG00000021692.10 transcript:ENSMUST00000022203.10 gene_biotype:protein_coding transcript_biotype:protein_coding gene_symbol:Dimt1 description:DIM1 dimethyladenosine transferase 1-like (S. cerevisiae) [Source:MGI Symbol;Acc:MGI:1913504]	3	1	1	1	313	35.3	9.99	1.04475	1.71117	0.61055	0.000322805
ENSMUSP00000010451	transmembrane protein 86A	Tmem86a	pep chromosome:GRCm39:7:46700349:46704525:1 gene:ENSMUSG00000010307.8 transcript:ENSMUST00000010451.8 gene_biotype:protein_coding transcript_biotype:protein_coding gene_symbol:Tmem86a description:transmembrane protein 86A [Source:MGI Symbol;Acc:MGI:1915143]	10	3	3	4	241	26.3	8.56	0.881513	1.46155	0.603138	0.000229473
ENSMUSP00000006557	elongation of very long chain fatty acids (FEN1/Elo2, SUR4/Elo3, yeast)-like 1	Elovl1	pep chromosome:GRCm39:4:118285290:118290150:1 gene:ENSMUSG00000006390.16 transcript:ENSMUST00000006557.13 gene_biotype:protein_coding transcript_biotype:protein_coding gene_symbol:Elovl1 description:elongation of very long chain fatty acids (FEN1/Elo2, SUR4/Elo3, yeast)-like 1 [Source:MGI Symbol;Acc:MGI:1858959]	5	1	1	1	279	32.7	9.63	0.877752	1.46294	0.599992	0.000197836
ENSMUSP00000124599	SAM domain and HD domain, 1	Samhd1	pep chromosome:GRCm39:2:156941321:156977013:-1 gene:ENSMUSG00000027639.17 transcript:ENSMUST00000123932.8 gene_biotype:protein_coding transcript_biotype:nonsense_mediated_decay gene_symbol:Samhd1 description:SAM domain and HD domain, 1 [Source:MGI Symbol;Acc:MGI:1927468]	14	1	2	2	150	16.6	4.74	0.908166	1.519	0.59787	0.000178786
ENSMUSP00000031741	cytochrome P450, family 3, subfamily a, polypeptide 13	Cyp3a13	pep chromosome:GRCm39:5:137891194:137919881:-1 gene:ENSMUSG00000029727.8 transcript:ENSMUST00000031741.8 gene_biotype:protein_coding transcript_biotype:protein_coding gene_symbol:Cyp3a13 description:cytochrome P450, family 3, subfamily a, polypeptide 13 [Source:MGI Symbol;Acc:MGI:88610]	2	1	1	1	503	57.5	8.57	1.23985	2.07541	0.597401	0.000174806
ENSMUSP00000084591	transmembrane protein 164	Tmem164	pep chromosome:GRCm39:X:141464414:141621234:1 gene:ENSMUSG00000047045.18 transcript:ENSMUST00000087333.9 gene_biotype:protein_coding transcript_biotype:protein_coding gene_symbol:Tmem164 description:transmembrane protein 164 [Source:MGI Symbol;Acc:MGI:2148020]	5	1	1	1	296	33.4	8.1	0.862628	1.4522	0.594015	0.000148374
ENSMUSP00000111457	synaptojanin 2	Synj2	pep chromosome:GRCm39:17:5991555:6089443:1 gene:ENSMUSG00000023805.18 transcript:ENSMUST00000115791.10 gene_biotype:protein_coding transcript_biotype:protein_coding gene_symbol:Synj2 description:synaptojanin 2 [Source:MGI Symbol;Acc:MGI:1201671]	1	1	1	2	1479	163.5	7.75	0.837857	1.41915	0.590395	0.000124165
ENSMUSP00000057573	F-box protein 31	Fbxo31	pep chromosome:GRCm39:8:122276179:122305545:-1 gene:ENSMUSG00000052934.15 transcript:ENSMUST00000059018.14 gene_biotype:protein_coding transcript_biotype:protein_coding gene_symbol:Fbxo31 description:F-box protein 31 [Source:MGI Symbol;Acc:MGI:1354708]	1	1	1	1	507	57.2	6.98	0.815045	1.38745	0.58744	0.000107129
ENSMUSP00000096670	molybdenum cofactor synthesis 3	Mocs3	pep chromosome:GRCm39:2:168072542:168074514:1 gene:ENSMUSG00000074576.5 transcript:ENSMUST00000099071.5 gene_biotype:protein_coding transcript_biotype:protein_coding gene_symbol:Mocs3 description:molybdenum cofactor synthesis 3 [Source:MGI Symbol;Acc:MGI:1916622]	8	3	3	4	460	49.3	7.49	0.749854	1.28086	0.585431	9.67947e-05
ENSMUSP00000049973	HAUS augmin-like complex, subunit 3	Haus3	pep chromosome:GRCm39:5:34311224:34326871:-1 gene:ENSMUSG00000079555.3 transcript:ENSMUST00000060049.8 gene_biotype:protein_coding transcript_biotype:protein_coding gene_symbol:Haus3 description:HAUS augmin-like complex, subunit 3 [Source:MGI Symbol;Acc:MGI:2387633]	1	1	1	1	570	66.3	5.29	0.788775	1.35076	0.583948	8.97534e-05
ENSMUSP00000033749	pirin	Pir	pep chromosome:GRCm39:X:163052427:163156007:1 gene:ENSMUSG00000031379.14 transcript:ENSMUST00000033749.9 gene_biotype:protein_coding transcript_biotype:protein_coding gene_symbol:Pir description:pirin [Source:MGI Symbol;Acc:MGI:1916906]	3	1	1	1	290	32	7.11	0.90842	1.57817	0.575617	5.81719e-05
ENSMUSP00000032899	RIKEN cDNA 1110004F10 gene	1110004F10Rik	pep chromosome:GRCm39:7:115692536:115704445:1 gene:ENSMUSG00000030663.13 transcript:ENSMUST00000032899.12 gene_biotype:protein_coding transcript_biotype:protein_coding gene_symbol:1110004F10Rik description:RIKEN cDNA 1110004F10 gene [Source:MGI Symbol;Acc:MGI:1929274]	4	1	1	1	181	20	4.82	0.887122	1.5511	0.571929	4.77578e-05
ENSMUSP00000027367	CTD (carboxy-terminal domain, RNA polymerase II, polypeptide A) small phosphatase 1	Ctdsp1	pep chromosome:GRCm39:1:74430668:74436444:1 gene:ENSMUSG00000026176.14 transcript:ENSMUST00000027367.14 gene_biotype:protein_coding transcript_biotype:protein_coding gene_symbol:Ctdsp1 description:CTD (carboxy-terminal domain, RNA polymerase II, polypeptide A) small phosphatase 1 [Source:MGI Symbol;Acc:MGI:2654470]	11	3	3	3	261	29.2	6.13	0.776154	1.367	0.56778	3.80985e-05
ENSMUSP00000019882	polymerase (RNA) II (DNA directed) polypeptide I	Polr2i	pep chromosome:GRCm39:7:29931373:29932815:1 gene:ENSMUSG00000019738.16 transcript:ENSMUST00000019882.16 gene_biotype:protein_coding transcript_biotype:protein_coding gene_symbol:Polr2i description:polymerase (RNA) II (DNA directed) polypeptide I [Source:MGI Symbol;Acc:MGI:1917170]	15	2	2	2	125	14.5	5.14	1.19038	2.1281	0.559364	2.37726e-05
ENSMUSP00000157132	collectin sub-family member 12	Colec12	pep chromosome:GRCm39:18:9707595:9882644:1 gene:ENSMUSG00000036103.10 transcript:ENSMUST00000234965.2 gene_biotype:protein_coding transcript_biotype:protein_coding gene_symbol:Colec12 description:collectin sub-family member 12 [Source:MGI Symbol;Acc:MGI:2152907]	6	6	6	6	742	81.3	5.49	0.821132	1.47742	0.555787	1.93467e-05
ENSMUSP00000053403	eukaryotic translation initiation factor 4E member 2	Eif4e2	pep chromosome:GRCm39:1:87141636:87162433:1 gene:ENSMUSG00000026254.18 transcript:ENSMUST00000050876.14 gene_biotype:protein_coding transcript_biotype:protein_coding gene_symbol:Eif4e2 description:eukaryotic translation initiation factor 4E member 2 [Source:MGI Symbol;Acc:MGI:1914440]	10	2	2	2	259	29.5	8.25	0.794881	1.43239	0.554934	1.84101e-05
ENSMUSP00000024791	triggering receptor expressed on myeloid cells 2	Trem2	pep chromosome:GRCm39:17:48653429:48659301:1 gene:ENSMUSG00000023992.15 transcript:ENSMUST00000024791.15 gene_biotype:protein_coding transcript_biotype:protein_coding gene_symbol:Trem2 description:triggering receptor expressed on myeloid cells 2 [Source:MGI Symbol;Acc:MGI:1913150]	29	5	5	9	227	24.5	6.67	0.911912	1.64953	0.552831	1.62772e-05
ENSMUSP00000043537	SFT2 domain containing 2	Sft2d2	pep chromosome:GRCm39:1:165001906:165022007:-1 gene:ENSMUSG00000040848.12 transcript:ENSMUST00000043338.10 gene_biotype:protein_coding transcript_biotype:protein_coding gene_symbol:Sft2d2 description:SFT2 domain containing 2 [Source:MGI Symbol;Acc:MGI:1917362]	6	1	1	1	159	17.5	9.09	0.849315	1.54858	0.548449	1.25442e-05
ENSMUSP00000030154	nudix (nucleoside diphosphate linked moiety X)-type motif 2	Nudt2	pep chromosome:GRCm39:4:41465151:41480926:1 gene:ENSMUSG00000028443.7 transcript:ENSMUST00000030154.7 gene_biotype:protein_coding transcript_biotype:protein_coding gene_symbol:Nudt2 description:nudix (nucleoside diphosphate linked moiety X)-type motif 2 [Source:MGI Symbol;Acc:MGI:1913651]	27	3	3	4	147	17	6.28	0.895831	1.63606	0.547555	1.18874e-05
ENSMUSP00000132180	cytochrome P450, family 2, subfamily j, polypeptide 11	Cyp2j11	pep chromosome:GRCm39:4:96182745:96236899:-1 gene:ENSMUSG00000066097.7 transcript:ENSMUST00000015368.8 gene_biotype:protein_coding transcript_biotype:protein_coding gene_symbol:Cyp2j11 description:cytochrome P450, family 2, subfamily j, polypeptide 11 [Source:MGI Symbol;Acc:MGI:2140224]	5	1	1	1	504	57.5	8.05	1.04663	1.91279	0.547174	1.16175e-05
ENSMUSP00000034214	metallothionein 2	Mt2	pep chromosome:GRCm39:8:94899292:94900196:1 gene:ENSMUSG00000031762.8 transcript:ENSMUST00000034214.8 gene_biotype:protein_coding transcript_biotype:protein_coding gene_symbol:Mt2 description:metallothionein 2 [Source:MGI Symbol;Acc:MGI:97172]	20	1	1	1	61	6.1	7.83	0.935808	1.71061	0.547062	1.15389e-05
ENSMUSP00000147061	predicted gene 45208	Gm45208	pep chromosome:GRCm39:X:7588484:7596769:1 gene:ENSMUSG00000109493.2 transcript:ENSMUST00000208156.2 gene_biotype:protein_coding transcript_biotype:protein_coding gene_symbol:Gm45208 description:predicted gene 45208 [Source:MGI Symbol;Acc:MGI:5753784]	2	1	1	1	292	31.7	8.79	0.909984	1.66541	0.546404	1.10889e-05
ENSMUSP00000026617	phosphorylase kinase gamma 1	Phkg1	pep chromosome:GRCm39:5:129892262:129907924:-1 gene:ENSMUSG00000025537.13 transcript:ENSMUST00000026617.13 gene_biotype:protein_coding transcript_biotype:protein_coding gene_symbol:Phkg1 description:phosphorylase kinase gamma 1 [Source:MGI Symbol;Acc:MGI:97579]	2	1	1	1	388	44.9	6.55	1.07158	1.9698	0.544003	9.57961e-06
ENSMUSP00000079699	keratin 17	Krt17	pep chromosome:GRCm39:11:100147043:100151855:-1 gene:ENSMUSG00000035557.10 transcript:ENSMUST00000080893.7 gene_biotype:protein_coding transcript_biotype:protein_coding gene_symbol:Krt17 description:keratin 17 [Source:MGI Symbol;Acc:MGI:96691]	34	4	16	36	433	48.1	5.06	0.841986	1.59617	0.527503	3.3513e-06
ENSMUSP00000058761	olfactomedin-like 2A	Olfml2a	pep chromosome:GRCm39:2:38821990:38853765:1 gene:ENSMUSG00000046618.8 transcript:ENSMUST00000057279.6 gene_biotype:protein_coding transcript_biotype:protein_coding gene_symbol:Olfml2a description:olfactomedin-like 2A [Source:MGI Symbol;Acc:MGI:2444741]	1	1	1	1	681	76.5	7.68	0.785619	1.52596	0.514837	1.41516e-06
ENSMUSP00000143864	olfactory receptor 1408	Olfr1408	pep chromosome:GRCm39:1:172955616:172964941:-1 gene:ENSMUSG00000062527.7 transcript:ENSMUST00000200689.5 gene_biotype:protein_coding transcript_biotype:protein_coding gene_symbol:Olfr1408 description:olfactory receptor 1408 [Source:MGI Symbol;Acc:MGI:3031242]	2	1	1	1	310	34.9	8.51	0.86521	1.68173	0.514477	1.37994e-06
ENSMUSP00000129704	enolase-phosphatase 1	Enoph1	pep chromosome:GRCm39:5:100187844:100216619:1 gene:ENSMUSG00000029326.14 transcript:ENSMUST00000169390.8 gene_biotype:protein_coding transcript_biotype:protein_coding gene_symbol:Enoph1 description:enolase-phosphatase 1 [Source:MGI Symbol;Acc:MGI:1915120]	11	3	3	3	257	28.6	4.92	0.931488	1.82563	0.510229	1.02112e-06
ENSMUSP00000096152	tropomodulin 2	Tmod2	pep chromosome:GRCm39:9:75472903:75518585:-1 gene:ENSMUSG00000032186.16 transcript:ENSMUST00000098552.10 gene_biotype:protein_coding transcript_biotype:protein_coding gene_symbol:Tmod2 description:tropomodulin 2 [Source:MGI Symbol;Acc:MGI:1355335]	4	1	2	3	351	39.5	5.35	1.10029	2.15803	0.509858	9.94289e-07
ENSMUSP00000029377	transmembrane 4 superfamily member 4	Tm4sf4	pep chromosome:GRCm39:3:57332735:57349098:1 gene:ENSMUSG00000027801.8 transcript:ENSMUST00000029377.8 gene_biotype:protein_coding transcript_biotype:protein_coding gene_symbol:Tm4sf4 description:transmembrane 4 superfamily member 4 [Source:MGI Symbol;Acc:MGI:2385173]	3	1	1	1	202	21.3	5.41	0.370797	0.731574	0.506848	8.00065e-07
ENSMUSP00000141022	glutaredoxin 2 (thioltransferase)	Glrx2	pep chromosome:GRCm39:1:143615295:143625139:1 gene:ENSMUSG00000018196.19 transcript:ENSMUST00000185362.7 gene_biotype:protein_coding transcript_biotype:protein_coding gene_symbol:Glrx2 description:glutaredoxin 2 (thioltransferase) [Source:MGI Symbol;Acc:MGI:1916617]	6	1	1	1	156	17.3	9.95	1.03524	2.0513	0.504674	6.82507e-07
ENSMUSP00000092673	INTS3 and NABP interacting protein	Inip	pep chromosome:GRCm39:4:59769637:59783866:-1 gene:ENSMUSG00000038544.15 transcript:ENSMUST00000095063.11 gene_biotype:protein_coding transcript_biotype:protein_coding gene_symbol:Inip description:INTS3 and NABP interacting protein [Source:MGI Symbol;Acc:MGI:1913459]	13	1	1	1	104	11.4	9.25	0.946803	1.9081	0.496202	3.61734e-07
ENSMUSP00000023790	keratin 1	Krt1	pep chromosome:GRCm39:15:101753861:101759229:-1 gene:ENSMUSG00000046834.8 transcript:ENSMUST00000023790.5 gene_biotype:protein_coding transcript_biotype:protein_coding gene_symbol:Krt1 description:keratin 1 [Source:MGI Symbol;Acc:MGI:96698]	6	3	7	20	637	65.6	8.15	0.794236	1.64454	0.482952	1.27254e-07
ENSMUSP00000023788	keratin 6A	Krt6a	pep chromosome:GRCm39:15:101598345:101602742:-1 gene:ENSMUSG00000058354.8 transcript:ENSMUST00000023788.8 gene_biotype:protein_coding transcript_biotype:protein_coding gene_symbol:Krt6a description:keratin 6A [Source:MGI Symbol;Acc:MGI:1100845]	28	5	21	53	553	59.3	7.94	0.737669	1.5483	0.476438	7.43028e-08
ENSMUSP00000015920	mediator complex subunit 22	Med22	pep chromosome:GRCm39:2:26795600:26800581:-1 gene:ENSMUSG00000015776.13 transcript:ENSMUST00000015920.12 gene_biotype:protein_coding transcript_biotype:protein_coding gene_symbol:Med22 description:mediator complex subunit 22 [Source:MGI Symbol;Acc:MGI:98446]	12	2	2	3	200	22.3	4.68	0.848384	1.81433	0.467602	3.48558e-08
ENSMUSP00000019441	NOP9 nucleolar protein	Nop9	pep chromosome:GRCm39:14:55983150:55992957:1 gene:ENSMUSG00000019297.10 transcript:ENSMUST00000019441.9 gene_biotype:protein_coding transcript_biotype:protein_coding gene_symbol:Nop9 description:NOP9 nucleolar protein [Source:MGI Symbol;Acc:MGI:1915092]	5	3	3	3	636	70	7.27	0.881029	1.90183	0.463252	2.37301e-08
ENSMUSP00000031931	RIKEN cDNA 2210010C04 gene	2210010C04Rik	pep chromosome:GRCm39:6:41007202:41012443:-1 gene:ENSMUSG00000029882.6 transcript:ENSMUST00000031931.6 gene_biotype:protein_coding transcript_biotype:protein_coding gene_symbol:2210010C04Rik description:RIKEN cDNA 2210010C04 gene [Source:MGI Symbol;Acc:MGI:1914623]	5	1	1	2	247	26.4	7.93	0.875783	1.92303	0.455418	1.16313e-08
ENSMUSP00000018985	RAD51 paralog D	Rad51d	pep chromosome:GRCm39:11:82767525:82781440:-1 gene:ENSMUSG00000018841.18 transcript:ENSMUST00000018985.15 gene_biotype:protein_coding transcript_biotype:protein_coding gene_symbol:Rad51d description:RAD51 paralog D [Source:MGI Symbol;Acc:MGI:1261809]	9	1	1	1	329	35.2	7.2	0.961259	2.13065	0.451159	7.80407e-09
ENSMUSP00000048063	TSPO associated protein 1	Tspoap1	pep chromosome:GRCm39:11:87651367:87676754:1 gene:ENSMUSG00000034156.17 transcript:ENSMUST00000039627.12 gene_biotype:protein_coding transcript_biotype:protein_coding gene_symbol:Tspoap1 description:TSPO associated protein 1 [Source:MGI Symbol;Acc:MGI:2450877]	0	1	1	1	1846	199.8	5.29	0.728368	1.63171	0.446384	4.94019e-09
ENSMUSP00000029711	insulin receptor-related receptor	Insrr	pep chromosome:GRCm39:3:87704258:87723408:1 gene:ENSMUSG00000005640.12 transcript:ENSMUST00000029711.9 gene_biotype:protein_coding transcript_biotype:protein_coding gene_symbol:Insrr description:insulin receptor-related receptor [Source:MGI Symbol;Acc:MGI:1346037]	1	1	1	5	1300	144.8	6.64	0.739335	1.71791	0.43037	9.84002e-10
ENSMUSP00000075945	Fc fragment of IgG binding protein	Fcgbp	pep chromosome:GRCm39:7:27770661:27820287:1 gene:ENSMUSG00000047730.18 transcript:ENSMUST00000076648.8 gene_biotype:protein_coding transcript_biotype:protein_coding gene_symbol:Fcgbp description:Fc fragment of IgG binding protein [Source:MGI Symbol;Acc:MGI:2444336]	0	1	1	3	2583	275.1	5.03	0.80354	1.94245	0.413673	1.58846e-10
ENSMUSP00000023583	alpha-2-HS-glycoprotein	Ahsg	pep chromosome:GRCm39:16:22710787:22718193:1 gene:ENSMUSG00000022868.7 transcript:ENSMUST00000023583.7 gene_biotype:protein_coding transcript_biotype:protein_coding gene_symbol:Ahsg description:alpha-2-HS-glycoprotein [Source:MGI Symbol;Acc:MGI:107189]	2	1	1	3	345	37.3	6.51	0.965192	2.57232	0.375222	1.2619e-12
ENSMUSP00000062637	C2 calcium-dependent domain containing 3	C2cd3	pep chromosome:GRCm39:7:100021440:100119357:1 gene:ENSMUSG00000047248.21 transcript:ENSMUST00000051777.15 gene_biotype:protein_coding transcript_biotype:protein_coding gene_symbol:C2cd3 description:C2 calcium-dependent domain containing 3 [Source:MGI Symbol;Acc:MGI:2142166]	0	1	1	1	2323	255.2	6.95	0.927456	2.4883	0.372726	8.90654e-13
ENSMUSP00000025523	colony stimulating factor 1 receptor	Csf1r	pep chromosome:GRCm39:18:61238644:61264206:1 gene:ENSMUSG00000024621.17 transcript:ENSMUST00000025523.13 gene_biotype:protein_coding transcript_biotype:protein_coding gene_symbol:Csf1r description:colony stimulating factor 1 receptor [Source:MGI Symbol;Acc:MGI:1339758]	11	9	9	15	977	109.1	6.21	0.808288	2.17542	0.371555	7.55118e-13
ENSMUSP00000105736	phospholipase C, beta 4	Plcb4	pep chromosome:GRCm39:2:135583750:135856513:1 gene:ENSMUSG00000039943.17 transcript:ENSMUST00000110109.8 gene_biotype:protein_coding transcript_biotype:protein_coding gene_symbol:Plcb4 description:phospholipase C, beta 4 [Source:MGI Symbol;Acc:MGI:107464]	1	1	1	1	1175	134.4	6.9	1.113	3.09667	0.359419	1.28255e-13
ENSMUSP00000026220	stearoyl-coenzyme A desaturase 3	Scd3	pep chromosome:GRCm39:19:44191708:44232455:1 gene:ENSMUSG00000025202.9 transcript:ENSMUST00000026220.7 gene_biotype:protein_coding transcript_biotype:protein_coding gene_symbol:Scd3 description:stearoyl-coenzyme A desaturase 3 [Source:MGI Symbol;Acc:MGI:1353437]	2	1	1	1	359	41.4	8.94	0.731017	2.11838	0.345082	1.35241e-14
ENSMUSP00000049175	guanine nucleotide binding protein, alpha 15	Gna15	pep chromosome:GRCm39:10:81338147:81360059:-1 gene:ENSMUSG00000034792.9 transcript:ENSMUST00000043709.8 gene_biotype:protein_coding transcript_biotype:protein_coding gene_symbol:Gna15 description:guanine nucleotide binding protein, alpha 15 [Source:MGI Symbol;Acc:MGI:95770]	2	1	1	1	374	43.5	7.4	0.557284	1.64013	0.33978	5.62134e-15
ENSMUSP00000021083	Jupiter microtubule associated homolog 1	Jpt1	pep chromosome:GRCm39:11:115388179:115405213:-1 gene:ENSMUSG00000020737.13 transcript:ENSMUST00000021083.7 gene_biotype:protein_coding transcript_biotype:protein_coding gene_symbol:Jpt1 description:Jupiter microtubule associated homolog 1 [Source:MGI Symbol;Acc:MGI:1096361]	6	1	1	1	154	16.1	5.31	0.684811	2.06824	0.331109	1.26327e-15
ENSMUSP00000126197	keratin 78	Krt78	pep chromosome:GRCm39:15:101854436:101862722:-1 gene:ENSMUSG00000050463.10 transcript:ENSMUST00000164932.3 gene_biotype:protein_coding transcript_biotype:protein_coding gene_symbol:Krt78 description:keratin 78 [Source:MGI Symbol;Acc:MGI:1917529]	2	1	2	17	1068	112.2	7.97	0.642973	2.03033	0.316685	8.90553e-17
ENSMUSP00000073124	plectin	Plec	pep chromosome:GRCm39:15:76055174:76090521:-1 gene:ENSMUSG00000022565.16 transcript:ENSMUST00000073418.13 gene_biotype:protein_coding transcript_biotype:protein_coding gene_symbol:Plec description:plectin [Source:MGI Symbol;Acc:MGI:1277961]	49	230	235	442	4691	533.9	5.96	1.15756	1.1357	1.01925	0.936206
ENSMUSP00000090633	AHNAK nucleoprotein (desmoyokin)	Ahnak	pep chromosome:GRCm39:19:8966648:8996560:1 gene:ENSMUSG00000069833.14 transcript:ENSMUST00000092956.4 gene_biotype:protein_coding transcript_biotype:protein_coding gene_symbol:Ahnak description:AHNAK nucleoprotein (desmoyokin) [Source:MGI Symbol;Acc:MGI:1316648]	60	180	180	326	5656	603.9	6.3	1.10632	0.987806	1.11998	0.495505
ENSMUSP00000109938	filamin, alpha	Flna	pep chromosome:GRCm39:X:73267067:73293426:-1 gene:ENSMUSG00000031328.17 transcript:ENSMUST00000114299.8 gene_biotype:protein_coding transcript_biotype:protein_coding gene_symbol:Flna description:filamin, alpha [Source:MGI Symbol;Acc:MGI:95556]	55	108	115	311	2639	280.3	6.01	1.11785	1.07465	1.0402	0.833758
ENSMUSP00000016771	myosin, heavy polypeptide 9, non-muscle	Myh9	pep chromosome:GRCm39:15:77644787:77726375:-1 gene:ENSMUSG00000022443.18 transcript:ENSMUST00000016771.13 gene_biotype:protein_coding transcript_biotype:protein_coding gene_symbol:Myh9 description:myosin, heavy polypeptide 9, non-muscle [Source:MGI Symbol;Acc:MGI:107717]	49	99	104	281	1960	226.2	5.66	1.0336	0.990629	1.04338	0.818604
ENSMUSP00000030187	talin 1	Tln1	pep chromosome:GRCm39:4:43531519:43562422:-1 gene:ENSMUSG00000028465.17 transcript:ENSMUST00000030187.14 gene_biotype:protein_coding transcript_biotype:protein_coding gene_symbol:Tln1 description:talin 1 [Source:MGI Symbol;Acc:MGI:1099832]	50	91	104	252	2541	269.7	6.18	1.0344	0.897693	1.15229	0.388072
ENSMUSP00000018851	dynein cytoplasmic 1 heavy chain 1	Dync1h1	pep chromosome:GRCm39:12:110567886:110633379:1 gene:ENSMUSG00000018707.14 transcript:ENSMUST00000018851.14 gene_biotype:protein_coding transcript_biotype:protein_coding gene_symbol:Dync1h1 description:dynein cytoplasmic 1 heavy chain 1 [Source:MGI Symbol;Acc:MGI:103147]	29	135	135	233	4644	531.7	6.42	0.99462	1.01345	0.981417	0.855639
ENSMUSP00000095507	microtubule-actin crosslinking factor 1	Macf1	pep chromosome:GRCm39:4:123243426:123578153:-1 gene:ENSMUSG00000028649.22 transcript:ENSMUST00000097897.11 gene_biotype:protein_coding transcript_biotype:protein_coding gene_symbol:Macf1 description:microtubule-actin crosslinking factor 1 [Source:MGI Symbol;Acc:MGI:108559]	17	10	125	154	7355	831.4	5.41	0.987514	1.01639	0.971585	0.799217
ENSMUSP00000128278	IQ motif containing GTPase activating protein 1	Iqgap1	pep chromosome:GRCm39:7:80361331:80453164:-1 gene:ENSMUSG00000030536.11 transcript:ENSMUST00000167377.3 gene_biotype:protein_coding transcript_biotype:protein_coding gene_symbol:Iqgap1 description:IQ motif containing GTPase activating protein 1 [Source:MGI Symbol;Acc:MGI:1352757]	48	65	68	203	1657	188.6	6.48	1.10982	1.12765	0.984183	0.871558
ENSMUSP00000153225	myoferlin	Myof	pep chromosome:GRCm39:19:37887758:38031799:-1 gene:ENSMUSG00000048612.17 transcript:ENSMUST00000226068.2 gene_biotype:protein_coding transcript_biotype:protein_coding gene_symbol:Myof description:myoferlin [Source:MGI Symbol;Acc:MGI:1919192]	45	86	88	194	2061	234.4	6.14	1.1583	1.02317	1.13207	0.453168
ENSMUSP00000114568	microtubule-actin crosslinking factor 1	Macf1	pep chromosome:GRCm39:4:123243509:123438624:-1 gene:ENSMUSG00000028649.22 transcript:ENSMUST00000151346.8 gene_biotype:protein_coding transcript_biotype:protein_coding gene_symbol:Macf1 description:microtubule-actin crosslinking factor 1 [Source:MGI Symbol;Acc:MGI:108559]	22	2	116	144	5333	607.9	5.4	1.01325	1.21028	0.837203	0.1851
ENSMUSP00000044004	low density lipoprotein receptor-related protein 1	Lrp1	pep chromosome:GRCm39:10:127374030:127457017:-1 gene:ENSMUSG00000040249.16 transcript:ENSMUST00000049149.15 gene_biotype:protein_coding transcript_biotype:protein_coding gene_symbol:Lrp1 description:low density lipoprotein receptor-related protein 1 [Source:MGI Symbol;Acc:MGI:96828]	25	92	94	171	4545	504.4	5.36	0.942429	1.00625	0.936579	0.604231
ENSMUSP00000016072	ribosome binding protein 1	Rrbp1	pep chromosome:GRCm39:2:143789315:143853183:-1 gene:ENSMUSG00000027422.16 transcript:ENSMUST00000016072.12 gene_biotype:protein_coding transcript_biotype:protein_coding gene_symbol:Rrbp1 description:ribosome binding protein 1 [Source:MGI Symbol;Acc:MGI:1932395]	61	78	78	170	1464	158.3	9.19	1.25813	1.29007	0.975242	0.820164
ENSMUSP00000050220	clathrin, heavy polypeptide (Hc)	Cltc	pep chromosome:GRCm39:11:86585481:86648327:-1 gene:ENSMUSG00000047126.18 transcript:ENSMUST00000060766.16 gene_biotype:protein_coding transcript_biotype:protein_coding gene_symbol:Cltc description:clathrin, heavy polypeptide (Hc) [Source:MGI Symbol;Acc:MGI:2388633]	42	60	60	188	1679	191.9	5.69	0.910379	0.889554	1.02341	0.915568
ENSMUSP00000061493	early endosome antigen 1	Eea1	pep chromosome:GRCm39:10:95776612:95881380:1 gene:ENSMUSG00000036499.10 transcript:ENSMUST00000053484.8 gene_biotype:protein_coding transcript_biotype:protein_coding gene_symbol:Eea1 description:early endosome antigen 1 [Source:MGI Symbol;Acc:MGI:2442192]	50	73	73	136	1411	160.8	5.77	1.06131	1.07047	0.99145	0.913391
ENSMUSP00000091429	ring finger protein 213	Rnf213	pep chromosome:GRCm39:11:119283926:119378241:1 gene:ENSMUSG00000070327.15 transcript:ENSMUST00000093902.12 gene_biotype:protein_coding transcript_biotype:protein_coding gene_symbol:Rnf213 description:ring finger protein 213 [Source:MGI Symbol;Acc:MGI:1289196]	15	79	79	109	5152	584.4	6.8	0.86835	0.783339	1.10852	0.537922
ENSMUSP00000039657	ATPase, Na+/K+ transporting, alpha 1 polypeptide	Atp1a1	pep chromosome:GRCm39:3:101483535:101512000:-1 gene:ENSMUSG00000033161.11 transcript:ENSMUST00000036493.8 gene_biotype:protein_coding transcript_biotype:protein_coding gene_symbol:Atp1a1 description:ATPase, Na+/K+ transporting, alpha 1 polypeptide [Source:MGI Symbol;Acc:MGI:88105]	47	31	46	138	1023	112.9	5.45	1.12348	1.07056	1.04943	0.790017
ENSMUSP00000103015	alanyl (membrane) aminopeptidase	Anpep	pep chromosome:GRCm39:7:79471551:79497958:-1 gene:ENSMUSG00000039062.16 transcript:ENSMUST00000107392.8 gene_biotype:protein_coding transcript_biotype:protein_coding gene_symbol:Anpep description:alanyl (membrane) aminopeptidase [Source:MGI Symbol;Acc:MGI:5000466]	38	33	33	168	966	109.6	5.9	1.48073	1.15878	1.27784	0.127696
ENSMUSP00000081912	nuclear mitotic apparatus protein 1	Numa1	pep chromosome:GRCm39:7:101619028:101664171:1 gene:ENSMUSG00000066306.14 transcript:ENSMUST00000084852.13 gene_biotype:protein_coding transcript_biotype:protein_coding gene_symbol:Numa1 description:nuclear mitotic apparatus protein 1 [Source:MGI Symbol;Acc:MGI:2443665]	31	61	61	84	2094	235.5	5.87	1.05125	1.15222	0.912369	0.479739
ENSMUSP00000117616	translocated promoter region, nuclear basket protein	Tpr	pep chromosome:GRCm39:1:150268589:150325566:1 gene:ENSMUSG00000006005.19 transcript:ENSMUST00000124973.9 gene_biotype:protein_coding transcript_biotype:protein_coding gene_symbol:Tpr description:translocated promoter region, nuclear basket protein [Source:MGI Symbol;Acc:MGI:1922066]	26	67	67	94	2431	273.8	5.03	1.06486	1.08212	0.984054	0.870815
ENSMUSP00000121201	lymphocyte cytosolic protein 1	Lcp1	pep chromosome:GRCm39:14:75368994:75467236:1 gene:ENSMUSG00000021998.17 transcript:ENSMUST00000124499.8 gene_biotype:protein_coding transcript_biotype:protein_coding gene_symbol:Lcp1 description:lymphocyte cytosolic protein 1 [Source:MGI Symbol;Acc:MGI:104808]	64	30	35	151	627	70.1	5.33	0.903067	0.90252	1.00061	0.965993
ENSMUSP00000092697	spectrin alpha, non-erythrocytic 1	Sptan1	pep chromosome:GRCm39:2:29855692:29921463:1 gene:ENSMUSG00000057738.15 transcript:ENSMUST00000095083.11 gene_biotype:protein_coding transcript_biotype:protein_coding gene_symbol:Sptan1 description:spectrin alpha, non-erythrocytic 1 [Source:MGI Symbol;Acc:MGI:98386]	26	58	58	84	2472	284.4	5.33	0.903733	1.03347	0.874468	0.311569
ENSMUSP00000028062	vimentin	Vim	pep chromosome:GRCm39:2:13578763:13587637:1 gene:ENSMUSG00000026728.10 transcript:ENSMUST00000028062.8 gene_biotype:protein_coding transcript_biotype:protein_coding gene_symbol:Vim description:vimentin [Source:MGI Symbol;Acc:MGI:98932]	73	33	37	220	466	53.7	5.12	1.24934	1.26471	0.987847	0.89265
ENSMUSP00000066068	actinin alpha 4	Actn4	pep chromosome:GRCm39:7:28592673:28661765:-1 gene:ENSMUSG00000054808.16 transcript:ENSMUST00000068045.14 gene_biotype:protein_coding transcript_biotype:protein_coding gene_symbol:Actn4 description:actinin alpha 4 [Source:MGI Symbol;Acc:MGI:1890773]	53	32	47	120	912	104.9	5.41	1.22336	1.06433	1.14941	0.396905
ENSMUSP00000113071	moesin	Msn	pep chromosome:GRCm39:X:95139648:95212158:1 gene:ENSMUSG00000031207.17 transcript:ENSMUST00000117399.2 gene_biotype:protein_coding transcript_biotype:protein_coding gene_symbol:Msn description:moesin [Source:MGI Symbol;Acc:MGI:97167]	56	29	41	136	577	67.7	6.6	1.08942	1.08404	1.00497	0.990937
ENSMUSP00000099922	ATPase, Na+/K+ transporting, alpha 3 polypeptide	Atp1a3	pep chromosome:GRCm39:7:24677592:24705320:-1 gene:ENSMUSG00000040907.16 transcript:ENSMUST00000102858.10 gene_biotype:protein_coding transcript_biotype:protein_coding gene_symbol:Atp1a3 description:ATPase, Na+/K+ transporting, alpha 3 polypeptide [Source:MGI Symbol;Acc:MGI:88107]	42	24	39	108	1053	115.9	5.64	1.3311	1.06563	1.24912	0.168155
ENSMUSP00000029699	lamin A	Lmna	pep chromosome:GRCm39:3:88388455:88410642:-1 gene:ENSMUSG00000028063.16 transcript:ENSMUST00000029699.13 gene_biotype:protein_coding transcript_biotype:protein_coding gene_symbol:Lmna description:lamin A [Source:MGI Symbol;Acc:MGI:96794]	59	41	43	115	665	74.2	6.98	1.20051	1.2144	0.988566	0.89679
ENSMUSP00000028222	heat shock protein 5	Hspa5	pep chromosome:GRCm39:2:34661982:34667559:1 gene:ENSMUSG00000026864.14 transcript:ENSMUST00000028222.13 gene_biotype:protein_coding transcript_biotype:protein_coding gene_symbol:Hspa5 description:heat shock protein 5 [Source:MGI Symbol;Acc:MGI:95835]	56	34	37	147	655	72.4	5.16	1.08105	1.0364	1.04308	0.820005
ENSMUSP00000021554	actinin, alpha 1	Actn1	pep chromosome:GRCm39:12:80214321:80307145:-1 gene:ENSMUSG00000015143.16 transcript:ENSMUST00000021554.16 gene_biotype:protein_coding transcript_biotype:protein_coding gene_symbol:Actn1 description:actinin, alpha 1 [Source:MGI Symbol;Acc:MGI:2137706]	53	27	42	110	892	103	5.38	1.2009	1.09143	1.1003	0.569746
ENSMUSP00000024739	heat shock protein 90 alpha (cytosolic), class B member 1	Hsp90ab1	pep chromosome:GRCm39:17:45878701:45884197:-1 gene:ENSMUSG00000023944.15 transcript:ENSMUST00000024739.14 gene_biotype:protein_coding transcript_biotype:protein_coding gene_symbol:Hsp90ab1 description:heat shock protein 90 alpha (cytosolic), class B member 1 [Source:MGI Symbol;Acc:MGI:96247]	50	21	35	112	724	83.2	5.03	0.945706	0.933663	1.0129	0.968009
ENSMUSP00000025486	lamin B1	Lmnb1	pep chromosome:GRCm39:18:56840885:56886496:1 gene:ENSMUSG00000024590.9 transcript:ENSMUST00000025486.9 gene_biotype:protein_coding transcript_biotype:protein_coding gene_symbol:Lmnb1 description:lamin B1 [Source:MGI Symbol;Acc:MGI:96795]	60	34	40	94	588	66.7	5.16	0.911853	0.972873	0.937278	0.607983
ENSMUSP00000139804	DnaJ heat shock protein family (Hsp40) member C13	Dnajc13	pep chromosome:GRCm39:9:104029516:104124026:-1 gene:ENSMUSG00000032560.15 transcript:ENSMUST00000186788.7 gene_biotype:protein_coding transcript_biotype:protein_coding gene_symbol:Dnajc13 description:DnaJ heat shock protein family (Hsp40) member C13 [Source:MGI Symbol;Acc:MGI:2676368]	24	52	52	74	2248	254.9	6.77	1.02104	0.97078	1.05177	0.779091
ENSMUSP00000117493	myosin VA	Myo5a	pep chromosome:GRCm39:9:74978668:75125832:1 gene:ENSMUSG00000034593.17 transcript:ENSMUST00000155282.9 gene_biotype:protein_coding transcript_biotype:protein_coding gene_symbol:Myo5a description:myosin VA [Source:MGI Symbol;Acc:MGI:105976]	27	51	52	78	1855	215.4	8.5	1.12216	1.08297	1.03619	0.853073
ENSMUSP00000030164	valosin containing protein	Vcp	pep chromosome:GRCm39:4:42979963:43000507:-1 gene:ENSMUSG00000028452.8 transcript:ENSMUST00000030164.8 gene_biotype:protein_coding transcript_biotype:protein_coding gene_symbol:Vcp description:valosin containing protein [Source:MGI Symbol;Acc:MGI:99919]	59	36	36	83	806	89.3	5.26	1.0627	0.937955	1.133	0.450034
ENSMUSP00000046101	eukaryotic translation elongation factor 2	Eef2	pep chromosome:GRCm39:10:81012465:81018332:1 gene:ENSMUSG00000034994.11 transcript:ENSMUST00000047864.11 gene_biotype:protein_coding transcript_biotype:protein_coding gene_symbol:Eef2 description:eukaryotic translation elongation factor 2 [Source:MGI Symbol;Acc:MGI:95288]	49	38	39	115	858	95.3	6.83	0.930343	0.869977	1.06939	0.699108
ENSMUSP00000090884	dedicator of cyto-kinesis 2	Dock2	pep chromosome:GRCm39:11:34176815:34674719:-1 gene:ENSMUSG00000020143.16 transcript:ENSMUST00000093193.12 gene_biotype:protein_coding transcript_biotype:protein_coding gene_symbol:Dock2 description:dedicator of cyto-kinesis 2 [Source:MGI Symbol;Acc:MGI:2149010]	26	46	48	84	1828	211.6	6.99	0.997345	0.894637	1.1148	0.51439
ENSMUSP00000028794	sialic acid binding Ig-like lectin 1, sialoadhesin	Siglec1	pep chromosome:GRCm39:2:130911140:130928685:-1 gene:ENSMUSG00000027322.12 transcript:ENSMUST00000028794.10 gene_biotype:protein_coding transcript_biotype:protein_coding gene_symbol:Siglec1 description:sialic acid binding Ig-like lectin 1, sialoadhesin [Source:MGI Symbol;Acc:MGI:99668]	28	42	42	89	1701	183.5	6.68	0.637701	0.669864	0.951986	0.688455
ENSMUSP00000034834	pyruvate kinase, muscle	Pkm	pep chromosome:GRCm39:9:59563651:59586658:1 gene:ENSMUSG00000032294.18 transcript:ENSMUST00000034834.16 gene_biotype:protein_coding transcript_biotype:protein_coding gene_symbol:Pkm description:pyruvate kinase, muscle [Source:MGI Symbol;Acc:MGI:97591]	63	2	30	133	531	57.8	7.47	1.00958	0.908911	1.11076	0.529476
ENSMUSP00000000299	integrin beta 2	Itgb2	pep chromosome:GRCm39:10:77366086:77401520:1 gene:ENSMUSG00000000290.14 transcript:ENSMUST00000000299.14 gene_biotype:protein_coding transcript_biotype:protein_coding gene_symbol:Itgb2 description:integrin beta 2 [Source:MGI Symbol;Acc:MGI:96611]	58	36	37	115	770	84.8	7.05	1.14482	1.15215	0.993643	0.926008
ENSMUSP00000015800	heat shock protein 8	Hspa8	pep chromosome:GRCm39:9:40712280:40716496:1 gene:ENSMUSG00000015656.18 transcript:ENSMUST00000015800.16 gene_biotype:protein_coding transcript_biotype:protein_coding gene_symbol:Hspa8 description:heat shock protein 8 [Source:MGI Symbol;Acc:MGI:105384]	64	24	35	132	646	70.8	5.52	1.01937	1.05071	0.970173	0.791152
ENSMUSP00000128770	pyruvate kinase, muscle	Pkm	pep chromosome:GRCm39:9:59563856:59586472:1 gene:ENSMUSG00000032294.18 transcript:ENSMUST00000163694.4 gene_biotype:protein_coding transcript_biotype:protein_coding gene_symbol:Pkm description:pyruvate kinase, muscle [Source:MGI Symbol;Acc:MGI:97591]	59	1	29	131	531	57.9	7.14	0.735271	0.889308	0.826791	0.156998
ENSMUSP00000052020	filamin, beta	Flnb	pep chromosome:GRCm39:14:14518185:14651816:-1 gene:ENSMUSG00000025278.10 transcript:ENSMUST00000052678.9 gene_biotype:protein_coding transcript_biotype:protein_coding gene_symbol:Flnb description:filamin, beta [Source:MGI Symbol;Acc:MGI:2446089]	19	38	45	65	2602	277.7	5.71	1.1041	1.09733	1.00617	0.997806
ENSMUSP00000077040	vacuolar protein sorting 13C	Vps13c	pep chromosome:GRCm39:9:67747678:67902920:1 gene:ENSMUSG00000035284.11 transcript:ENSMUST00000077879.7 gene_biotype:protein_coding transcript_biotype:protein_coding gene_symbol:Vps13c description:vacuolar protein sorting 13C [Source:MGI Symbol;Acc:MGI:2444207]	17	52	53	83	3748	419.8	6.81	0.948412	0.963933	0.983898	0.869917
ENSMUSP00000138350	protein tyrosine phosphatase, receptor type, C	Ptprc	pep chromosome:GRCm39:1:137991151:138103005:-1 gene:ENSMUSG00000026395.17 transcript:ENSMUST00000183301.8 gene_biotype:protein_coding transcript_biotype:protein_coding gene_symbol:Ptprc description:protein tyrosine phosphatase, receptor type, C [Source:MGI Symbol;Acc:MGI:97810]	26	35	35	91	1293	144.7	5.94	1.05686	0.998035	1.05894	0.746064
ENSMUSP00000020238	heat shock protein 90, beta (Grp94), member 1	Hsp90b1	pep chromosome:GRCm39:10:86526704:86541373:-1 gene:ENSMUSG00000020048.14 transcript:ENSMUST00000020238.14 gene_biotype:protein_coding transcript_biotype:protein_coding gene_symbol:Hsp90b1 description:heat shock protein 90, beta (Grp94), member 1 [Source:MGI Symbol;Acc:MGI:98817]	43	33	34	131	802	92.4	4.82	1.09783	0.962576	1.14052	0.42512
ENSMUSP00000018449	pre-mRNA processing factor 8	Prpf8	pep chromosome:GRCm39:11:75377642:75400273:1 gene:ENSMUSG00000020850.15 transcript:ENSMUST00000018449.11 gene_biotype:protein_coding transcript_biotype:protein_coding gene_symbol:Prpf8 description:pre-mRNA processing factor 8 [Source:MGI Symbol;Acc:MGI:2179381]	21	48	48	83	2335	273.4	8.84	1.0558	1.02458	1.03047	0.880838
ENSMUSP00000020630	heat shock protein 4	Hspa4	pep chromosome:GRCm39:11:53150641:53191284:-1 gene:ENSMUSG00000020361.14 transcript:ENSMUST00000020630.8 gene_biotype:protein_coding transcript_biotype:protein_coding gene_symbol:Hspa4 description:heat shock protein 4 [Source:MGI Symbol;Acc:MGI:1342292]	50	40	40	74	842	94.1	5.21	0.95768	1.01513	0.943403	0.641141
ENSMUSP00000091921	heat shock protein 90, alpha (cytosolic), class A member 1	Hsp90aa1	pep chromosome:GRCm39:12:110657039:110662829:-1 gene:ENSMUSG00000021270.14 transcript:ENSMUST00000094361.11 gene_biotype:protein_coding transcript_biotype:protein_coding gene_symbol:Hsp90aa1 description:heat shock protein 90, alpha (cytosolic), class A member 1 [Source:MGI Symbol;Acc:MGI:96250]	41	16	29	100	733	84.7	5.01	0.898247	0.947057	0.948461	0.668915
ENSMUSP00000025930	structural maintenance of chromosomes 3	Smc3	pep chromosome:GRCm39:19:53588829:53634264:1 gene:ENSMUSG00000024974.11 transcript:ENSMUST00000025930.10 gene_biotype:protein_coding transcript_biotype:protein_coding gene_symbol:Smc3 description:structural maintenance of chromosomes 3 [Source:MGI Symbol;Acc:MGI:1339795]	36	42	43	58	1217	141.5	7.18	1.00708	1.10843	0.908563	0.461248
ENSMUSP00000020107	ATPase, Ca++ transporting, plasma membrane 1	Atp2b1	pep chromosome:GRCm39:10:98751014:98862005:1 gene:ENSMUSG00000019943.11 transcript:ENSMUST00000020107.8 gene_biotype:protein_coding transcript_biotype:protein_coding gene_symbol:Atp2b1 description:ATPase, Ca++ transporting, plasma membrane 1 [Source:MGI Symbol;Acc:MGI:104653]	30	32	32	80	1220	134.7	5.91	1.14947	0.927123	1.23982	0.183365
ENSMUSP00000025217	heat shock protein 9	Hspa9	pep chromosome:GRCm39:18:35070467:35087410:-1 gene:ENSMUSG00000024359.11 transcript:ENSMUST00000025217.11 gene_biotype:protein_coding transcript_biotype:protein_coding gene_symbol:Hspa9 description:heat shock protein 9 [Source:MGI Symbol;Acc:MGI:96245]	49	33	34	89	679	73.4	6.07	1.18182	1.11886	1.05627	0.758267
ENSMUSP00000026495	ATP synthase, H+ transporting, mitochondrial F1 complex, alpha subunit 1	Atp5a1	pep chromosome:GRCm39:18:77861429:77870569:1 gene:ENSMUSG00000025428.16 transcript:ENSMUST00000026495.15 gene_biotype:protein_coding transcript_biotype:protein_coding gene_symbol:Atp5a1 description:ATP synthase, H+ transporting, mitochondrial F1 complex, alpha subunit 1 [Source:MGI Symbol;Acc:MGI:88115]	51	26	26	118	553	59.7	9.19	1.29392	1.32229	0.978539	0.839094
ENSMUSP00000066181	inner membrane protein, mitochondrial	Immt	pep chromosome:GRCm39:6:71808315:71852228:1 gene:ENSMUSG00000052337.16 transcript:ENSMUST00000064062.13 gene_biotype:protein_coding transcript_biotype:protein_coding gene_symbol:Immt description:inner membrane protein, mitochondrial [Source:MGI Symbol;Acc:MGI:1923864]	49	11	37	70	757	83.8	6.61	1.13172	1.13658	0.995729	0.938003
ENSMUSP00000001544	von Willebrand factor A domain containing 5A	Vwa5a	pep chromosome:GRCm39:9:38629564:38654633:1 gene:ENSMUSG00000023186.15 transcript:ENSMUST00000001544.12 gene_biotype:protein_coding transcript_biotype:protein_coding gene_symbol:Vwa5a description:von Willebrand factor A domain containing 5A [Source:MGI Symbol;Acc:MGI:1915026]	41	28	28	88	793	87.1	6.58	1.05408	1.04122	1.01234	0.970796
ENSMUSP00000045239	golgi autoantigen, golgin subfamily b, macrogolgin 1	Golgb1	pep chromosome:GRCm39:16:36706496:36753447:1 gene:ENSMUSG00000034243.18 transcript:ENSMUST00000039855.9 gene_biotype:protein_coding transcript_biotype:protein_coding gene_symbol:Golgb1 description:golgi autoantigen, golgin subfamily b, macrogolgin 1 [Source:MGI Symbol;Acc:MGI:1099447]	14	43	43	54	3238	369.9	5.05	1.03271	1.01557	1.01688	0.948036
ENSMUSP00000101105	prosaposin	Psap	pep chromosome:GRCm39:10:60113449:60138373:1 gene:ENSMUSG00000004207.15 transcript:ENSMUST00000105465.8 gene_biotype:protein_coding transcript_biotype:protein_coding gene_symbol:Psap description:prosaposin [Source:MGI Symbol;Acc:MGI:97783]	49	22	22	186	554	61	5.24	1.28832	1.10525	1.16564	0.348951
ENSMUSP00000006629	spectrin beta, non-erythrocytic 1	Sptbn1	pep chromosome:GRCm39:11:30049395:30218169:-1 gene:ENSMUSG00000020315.19 transcript:ENSMUST00000006629.14 gene_biotype:protein_coding transcript_biotype:protein_coding gene_symbol:Sptbn1 description:spectrin beta, non-erythrocytic 1 [Source:MGI Symbol;Acc:MGI:98388]	22	47	47	62	2363	274.1	5.58	0.912976	1.06147	0.860106	0.25803
ENSMUSP00000026459	ATP synthase, H+ transporting mitochondrial F1 complex, beta subunit	Atp5b	pep chromosome:GRCm39:10:127919142:127926260:1 gene:ENSMUSG00000025393.13 transcript:ENSMUST00000026459.6 gene_biotype:protein_coding transcript_biotype:protein_coding gene_symbol:Atp5b description:ATP synthase, H+ transporting mitochondrial F1 complex, beta subunit [Source:MGI Symbol;Acc:MGI:107801]	57	19	19	102	529	56.3	5.34	1.18736	1.23932	0.958075	0.722522
ENSMUSP00000099788	annexin A6	Anxa6	pep chromosome:GRCm39:11:54869934:54924271:-1 gene:ENSMUSG00000018340.14 transcript:ENSMUST00000102727.3 gene_biotype:protein_coding transcript_biotype:protein_coding gene_symbol:Anxa6 description:annexin A6 [Source:MGI Symbol;Acc:MGI:88255]	56	36	38	86	667	75.2	5.55	1.22426	1.00155	1.22236	0.215006
ENSMUSP00000044645	structural maintenance of chromosomes 1A	Smc1a	pep chromosome:GRCm39:X:150799424:150845690:1 gene:ENSMUSG00000041133.12 transcript:ENSMUST00000045312.6 gene_biotype:protein_coding transcript_biotype:protein_coding gene_symbol:Smc1a description:structural maintenance of chromosomes 1A [Source:MGI Symbol;Acc:MGI:1344345]	35	44	44	60	1233	143.1	7.64	0.946851	0.991193	0.955263	0.706747
ENSMUSP00000037930	UDP-glucose glycoprotein glucosyltransferase 1	Uggt1	pep chromosome:GRCm39:1:36179108:36283386:-1 gene:ENSMUSG00000037470.15 transcript:ENSMUST00000046875.14 gene_biotype:protein_coding transcript_biotype:protein_coding gene_symbol:Uggt1 description:UDP-glucose glycoprotein glucosyltransferase 1 [Source:MGI Symbol;Acc:MGI:2443162]	25	33	33	73	1551	176.3	5.62	1.02305	0.97235	1.05215	0.777356
ENSMUSP00000135935	ATPase, Ca++ transporting, cardiac muscle, slow twitch 2	Atp2a2	pep chromosome:GRCm39:5:122591576:122640237:-1 gene:ENSMUSG00000029467.16 transcript:ENSMUST00000179939.8 gene_biotype:protein_coding transcript_biotype:nonsense_mediated_decay gene_symbol:Atp2a2 description:ATPase, Ca++ transporting, cardiac muscle, slow twitch 2 [Source:MGI Symbol;Acc:MGI:88110]	36	27	33	64	1044	114.8	5.34	1.13675	1.14161	0.995739	0.938058
ENSMUSP00000075513	enolase 1B, retrotransposed	Eno1b	pep chromosome:GRCm39:18:48178402:48181479:1 gene:ENSMUSG00000059040.6 transcript:ENSMUST00000076155.6 gene_biotype:protein_coding transcript_biotype:protein_coding gene_symbol:Eno1b description:enolase 1B, retrotransposed [Source:MGI Symbol;Acc:MGI:3648653]	58	15	19	88	434	47.1	6.8	1.02977	1.03954	0.990605	0.908529
ENSMUSP00000026427	extended synaptotagmin-like protein 1	Esyt1	pep chromosome:GRCm39:10:128345834:128361739:-1 gene:ENSMUSG00000025366.9 transcript:ENSMUST00000026427.8 gene_biotype:protein_coding transcript_biotype:protein_coding gene_symbol:Esyt1 description:extended synaptotagmin-like protein 1 [Source:MGI Symbol;Acc:MGI:1344426]	33	33	33	88	1092	121.5	5.95	1.21003	1.19198	1.01514	0.956766
ENSMUSP00000022322	glutamate dehydrogenase 1	Glud1	pep chromosome:GRCm39:14:34032684:34067222:1 gene:ENSMUSG00000021794.17 transcript:ENSMUST00000022322.17 gene_biotype:protein_coding transcript_biotype:protein_coding gene_symbol:Glud1 description:glutamate dehydrogenase 1 [Source:MGI Symbol;Acc:MGI:95753]	47	25	25	90	558	61.3	8	1.26283	1.17356	1.07607	0.669897
ENSMUSP00000099509	small nuclear ribonucleoprotein 200 (U5)	Snrnp200	pep chromosome:GRCm39:2:127050319:127082371:1 gene:ENSMUSG00000003660.11 transcript:ENSMUST00000103220.4 gene_biotype:protein_coding transcript_biotype:protein_coding gene_symbol:Snrnp200 description:small nuclear ribonucleoprotein 200 (U5) [Source:MGI Symbol;Acc:MGI:2444401]	21	44	44	73	2136	244.4	6.06	1.08019	1.12142	0.963235	0.751664
ENSMUSP00000104955	plexin B2	Plxnb2	pep chromosome:GRCm39:15:89039752:89064991:-1 gene:ENSMUSG00000036606.18 transcript:ENSMUST00000109331.9 gene_biotype:protein_coding transcript_biotype:protein_coding gene_symbol:Plxnb2 description:plexin B2 [Source:MGI Symbol;Acc:MGI:2154239]	25	39	39	53	1842	206.1	5.87	0.923507	0.998385	0.925	0.543312
ENSMUSP00000052872	fatty acid synthase	Fasn	pep chromosome:GRCm39:11:120696672:120715373:-1 gene:ENSMUSG00000025153.10 transcript:ENSMUST00000055655.9 gene_biotype:protein_coding transcript_biotype:protein_coding gene_symbol:Fasn description:fatty acid synthase [Source:MGI Symbol;Acc:MGI:95485]	20	47	47	63	2504	272.3	6.58	1.00917	0.965853	1.04484	0.811631
ENSMUSP00000022369	vinculin	Vcl	pep chromosome:GRCm39:14:20979466:21083744:1 gene:ENSMUSG00000021823.11 transcript:ENSMUST00000022369.9 gene_biotype:protein_coding transcript_biotype:protein_coding gene_symbol:Vcl description:vinculin [Source:MGI Symbol;Acc:MGI:98927]	34	37	37	59	1066	116.6	6	1.05666	0.986746	1.07085	0.69264
ENSMUSP00000097282	hexokinase 1	Hk1	pep chromosome:GRCm39:10:62104634:62176321:-1 gene:ENSMUSG00000037012.19 transcript:ENSMUST00000099691.11 gene_biotype:protein_coding transcript_biotype:protein_coding gene_symbol:Hk1 description:hexokinase 1 [Source:MGI Symbol;Acc:MGI:96103]	39	30	33	71	918	102.2	6.8	1.21662	1.20587	1.00891	0.988088
ENSMUSP00000028045	mannose receptor, C type 1	Mrc1	pep chromosome:GRCm39:2:14234203:14336868:1 gene:ENSMUSG00000026712.4 transcript:ENSMUST00000028045.4 gene_biotype:protein_coding transcript_biotype:protein_coding gene_symbol:Mrc1 description:mannose receptor, C type 1 [Source:MGI Symbol;Acc:MGI:97142]	30	38	38	67	1456	164.9	6.83	0.576067	0.640274	0.899719	0.419578
ENSMUSP00000000642	hexokinase 2	Hk2	pep chromosome:GRCm39:6:82702006:82751435:-1 gene:ENSMUSG00000000628.11 transcript:ENSMUST00000000642.11 gene_biotype:protein_coding transcript_biotype:protein_coding gene_symbol:Hk2 description:hexokinase 2 [Source:MGI Symbol;Acc:MGI:1315197]	40	30	34	74	917	102.5	6.11	1.18376	1.11284	1.06373	0.72436
ENSMUSP00000067685	IQ motif containing GTPase activating protein 2	Iqgap2	pep chromosome:GRCm39:13:95763682:96028503:-1 gene:ENSMUSG00000021676.11 transcript:ENSMUST00000068603.8 gene_biotype:protein_coding transcript_biotype:protein_coding gene_symbol:Iqgap2 description:IQ motif containing GTPase activating protein 2 [Source:MGI Symbol;Acc:MGI:2449975]	22	30	33	56	1575	180.4	5.64	0.994158	1.03449	0.961015	0.7391
ENSMUSP00000110314	ATPase, H+ transporting, lysosomal V1 subunit A	Atp6v1a	pep chromosome:GRCm39:16:43905765:43959668:-1 gene:ENSMUSG00000052459.14 transcript:ENSMUST00000114666.9 gene_biotype:protein_coding transcript_biotype:protein_coding gene_symbol:Atp6v1a description:ATPase, H+ transporting, lysosomal V1 subunit A [Source:MGI Symbol;Acc:MGI:1201780]	49	28	28	79	617	68.3	5.58	1.24952	0.999808	1.24976	0.167141
ENSMUSP00000032934	aldolase A, fructose-bisphosphate	Aldoa	pep chromosome:GRCm39:7:126394406:126398426:-1 gene:ENSMUSG00000030695.17 transcript:ENSMUST00000032934.12 gene_biotype:protein_coding transcript_biotype:protein_coding gene_symbol:Aldoa description:aldolase A, fructose-bisphosphate [Source:MGI Symbol;Acc:MGI:87994]	77	19	24	86	364	39.3	8.09	1.11167	1.05941	1.04932	0.790523
ENSMUSP00000028499	integrin alpha V	Itgav	pep chromosome:GRCm39:2:83554741:83637260:1 gene:ENSMUSG00000027087.12 transcript:ENSMUST00000028499.11 gene_biotype:protein_coding transcript_biotype:protein_coding gene_symbol:Itgav description:integrin alpha V [Source:MGI Symbol;Acc:MGI:96608]	38	32	32	60	1044	115.3	5.63	1.11837	1.01021	1.10706	0.543501
ENSMUSP00000127842	adaptor-related protein complex 2, alpha 1 subunit	Ap2a1	pep chromosome:GRCm39:7:44549797:44578920:-1 gene:ENSMUSG00000060279.15 transcript:ENSMUST00000166972.9 gene_biotype:protein_coding transcript_biotype:protein_coding gene_symbol:Ap2a1 description:adaptor-related protein complex 2, alpha 1 subunit [Source:MGI Symbol;Acc:MGI:101921]	35	19	31	67	977	107.6	7.03	1.06612	1.05078	1.0146	0.959481
ENSMUSP00000031411	aldehyde dehydrogenase 2, mitochondrial	Aldh2	pep chromosome:GRCm39:5:121704090:121731887:-1 gene:ENSMUSG00000029455.15 transcript:ENSMUST00000031411.15 gene_biotype:protein_coding transcript_biotype:protein_coding gene_symbol:Aldh2 description:aldehyde dehydrogenase 2, mitochondrial [Source:MGI Symbol;Acc:MGI:99600]	52	21	23	62	519	56.5	7.62	1.29702	1.25821	1.03084	0.879039
ENSMUSP00000131355	golgi apparatus protein 1	Glg1	pep chromosome:GRCm39:8:111881053:111985848:-1 gene:ENSMUSG00000003316.15 transcript:ENSMUST00000169020.8 gene_biotype:protein_coding transcript_biotype:protein_coding gene_symbol:Glg1 description:golgi apparatus protein 1 [Source:MGI Symbol;Acc:MGI:104967]	30	36	36	57	1175	133.6	6.84	0.767423	0.894312	0.858116	0.25108
ENSMUSP00000028683	protein disulfide isomerase associated 3	Pdia3	pep chromosome:GRCm39:2:121244256:121269168:1 gene:ENSMUSG00000027248.14 transcript:ENSMUST00000028683.14 gene_biotype:protein_coding transcript_biotype:protein_coding gene_symbol:Pdia3 description:protein disulfide isomerase associated 3 [Source:MGI Symbol;Acc:MGI:95834]	54	27	27	114	505	56.6	6.21	1.08755	0.932682	1.16604	0.347802
ENSMUSP00000026122	prolyl 4-hydroxylase, beta polypeptide	P4hb	pep chromosome:GRCm39:11:120451124:120464079:-1 gene:ENSMUSG00000025130.12 transcript:ENSMUST00000026122.11 gene_biotype:protein_coding transcript_biotype:protein_coding gene_symbol:P4hb description:prolyl 4-hydroxylase, beta polypeptide [Source:MGI Symbol;Acc:MGI:97464]	58	29	29	86	509	57	4.88	1.21096	1.09142	1.10953	0.534107
ENSMUSP00000127250	major vault protein	Mvp	pep chromosome:GRCm39:7:126586032:126613793:-1 gene:ENSMUSG00000030681.19 transcript:ENSMUST00000165096.9 gene_biotype:protein_coding transcript_biotype:protein_coding gene_symbol:Mvp description:major vault protein [Source:MGI Symbol;Acc:MGI:1925638]	40	28	28	62	870	96.8	5.64	1.05038	0.886935	1.18428	0.299301
ENSMUSP00000023116	aconitase 2, mitochondrial	Aco2	pep chromosome:GRCm39:15:81756510:81799334:1 gene:ENSMUSG00000022477.14 transcript:ENSMUST00000023116.7 gene_biotype:protein_coding transcript_biotype:protein_coding gene_symbol:Aco2 description:aconitase 2, mitochondrial [Source:MGI Symbol;Acc:MGI:87880]	43	28	28	69	780	85.4	7.93	1.14568	1.18184	0.969398	0.786723
ENSMUSP00000027123	heat shock protein 1 (chaperonin)	Hspd1	pep chromosome:GRCm39:1:55116994:55127183:-1 gene:ENSMUSG00000025980.15 transcript:ENSMUST00000027123.15 gene_biotype:protein_coding transcript_biotype:protein_coding gene_symbol:Hspd1 description:heat shock protein 1 (chaperonin) [Source:MGI Symbol;Acc:MGI:96242]	56	24	24	69	573	60.9	6.18	1.25308	1.20151	1.04292	0.820764
ENSMUSP00000026704	chaperonin containing Tcp1, subunit 8 (theta)	Cct8	pep chromosome:GRCm39:16:87280214:87292761:-1 gene:ENSMUSG00000025613.14 transcript:ENSMUST00000026704.14 gene_biotype:protein_coding transcript_biotype:protein_coding gene_symbol:Cct8 description:chaperonin containing Tcp1, subunit 8 (theta) [Source:MGI Symbol;Acc:MGI:107183]	55	29	29	66	548	59.5	5.62	0.985364	0.964077	1.02208	0.922159
ENSMUSP00000005651	P450 (cytochrome) oxidoreductase	Por	pep chromosome:GRCm39:5:135717890:135764180:1 gene:ENSMUSG00000005514.15 transcript:ENSMUST00000005651.13 gene_biotype:protein_coding transcript_biotype:protein_coding gene_symbol:Por description:P450 (cytochrome) oxidoreductase [Source:MGI Symbol;Acc:MGI:97744]	51	34	34	90	678	77	5.53	1.20633	1.14233	1.05602	0.75942
ENSMUSP00000112975	sphingosine phosphate lyase 1	Sgpl1	pep chromosome:GRCm39:10:60934421:60983423:-1 gene:ENSMUSG00000020097.15 transcript:ENSMUST00000122259.8 gene_biotype:protein_coding transcript_biotype:protein_coding gene_symbol:Sgpl1 description:sphingosine phosphate lyase 1 [Source:MGI Symbol;Acc:MGI:1261415]	34	22	22	84	568	63.6	9.1	1.35606	1.15854	1.17049	0.335478
ENSMUSP00000068468	integrin alpha M	Itgam	pep chromosome:GRCm39:7:127661812:127717663:1 gene:ENSMUSG00000030786.19 transcript:ENSMUST00000064821.14 gene_biotype:protein_coding transcript_biotype:protein_coding gene_symbol:Itgam description:integrin alpha M [Source:MGI Symbol;Acc:MGI:96607]	32	1	31	78	1154	127.5	7.25	0.92421	0.734793	1.25778	0.154944
ENSMUSP00000107927	leucine-rich PPR-motif containing	Lrpprc	pep chromosome:GRCm39:17:85012675:85097986:-1 gene:ENSMUSG00000024120.13 transcript:ENSMUST00000112308.9 gene_biotype:protein_coding transcript_biotype:protein_coding gene_symbol:Lrpprc description:leucine-rich PPR-motif containing [Source:MGI Symbol;Acc:MGI:1919666]	29	40	43	63	1392	156.5	6.83	1.05528	0.968898	1.08916	0.614651
ENSMUSP00000151685	erythrocyte membrane protein band 4.1 like 2	Epb41l2	pep chromosome:GRCm39:10:25235754:25399411:1 gene:ENSMUSG00000019978.17 transcript:ENSMUST00000218903.2 gene_biotype:protein_coding transcript_biotype:protein_coding gene_symbol:Epb41l2 description:erythrocyte membrane protein band 4.1 like 2 [Source:MGI Symbol;Acc:MGI:103009]	43	34	37	66	918	101.8	5.33	1.12218	1.12452	0.997917	0.950573
ENSMUSP00000095625	predicted gene, 49368	Gm49368	pep chromosome:GRCm39:7:127661855:127727332:1 gene:ENSMUSG00000108596.2 transcript:ENSMUST00000098015.10 gene_biotype:protein_coding transcript_biotype:protein_coding gene_symbol:Gm49368 description:predicted gene, 49368 [Source:MGI Symbol;Acc:MGI:6121583]	30	1	31	77	1232	135.9	8.21	1.27784	1.18057	1.08239	0.642882
ENSMUSP00000009234	adaptor protein complex AP-1, beta 1 subunit	Ap1b1	pep chromosome:GRCm39:11:4936824:4992791:1 gene:ENSMUSG00000009090.18 transcript:ENSMUST00000009234.16 gene_biotype:protein_coding transcript_biotype:protein_coding gene_symbol:Ap1b1 description:adaptor protein complex AP-1, beta 1 subunit [Source:MGI Symbol;Acc:MGI:1096368]	28	12	27	64	943	103.9	5.17	0.917757	0.922981	0.99434	0.930019
ENSMUSP00000034756	annexin A2	Anxa2	pep chromosome:GRCm39:9:69360902:69399077:1 gene:ENSMUSG00000032231.15 transcript:ENSMUST00000034756.15 gene_biotype:protein_coding transcript_biotype:protein_coding gene_symbol:Anxa2 description:annexin A2 [Source:MGI Symbol;Acc:MGI:88246]	64	24	24	104	339	38.7	7.69	1.37833	1.13188	1.21774	0.224084
ENSMUSP00000095656	Tu translation elongation factor, mitochondrial	Tufm	pep chromosome:GRCm39:7:126086533:126089899:1 gene:ENSMUSG00000073838.11 transcript:ENSMUST00000098048.6 gene_biotype:protein_coding transcript_biotype:protein_coding gene_symbol:Tufm description:Tu translation elongation factor, mitochondrial [Source:MGI Symbol;Acc:MGI:1923686]	69	27	27	71	452	49.5	7.56	1.14747	1.05146	1.09131	0.605805
ENSMUSP00000048925	von Willebrand factor A domain containing 8	Vwa8	pep chromosome:GRCm39:14:79086492:79439750:1 gene:ENSMUSG00000058997.9 transcript:ENSMUST00000040990.7 gene_biotype:protein_coding transcript_biotype:protein_coding gene_symbol:Vwa8 description:von Willebrand factor A domain containing 8 [Source:MGI Symbol;Acc:MGI:1919008]	22	38	38	56	1905	213.3	6.6	1.11215	1.02447	1.08558	0.629469
ENSMUSP00000099563	myosin IC	Myo1c	pep chromosome:GRCm39:11:75541330:75564736:1 gene:ENSMUSG00000017774.20 transcript:ENSMUST00000102505.10 gene_biotype:protein_coding transcript_biotype:protein_coding gene_symbol:Myo1c description:myosin IC [Source:MGI Symbol;Acc:MGI:106612]	30	33	33	54	1063	121.9	9.35	1.18241	1.16557	1.01444	0.960257
ENSMUSP00000086716	ubiquitin specific peptidase 9, X chromosome	Usp9x	pep chromosome:GRCm39:X:12937753:13039567:1 gene:ENSMUSG00000031010.18 transcript:ENSMUST00000089302.11 gene_biotype:protein_coding transcript_biotype:protein_coding gene_symbol:Usp9x description:ubiquitin specific peptidase 9, X chromosome [Source:MGI Symbol;Acc:MGI:894681]	14	37	37	49	2554	290	5.83	0.974266	0.880704	1.10624	0.546664
ENSMUSP00000022062	succinate dehydrogenase complex, subunit A, flavoprotein (Fp)	Sdha	pep chromosome:GRCm39:13:74470373:74498399:-1 gene:ENSMUSG00000021577.15 transcript:ENSMUST00000022062.8 gene_biotype:protein_coding transcript_biotype:protein_coding gene_symbol:Sdha description:succinate dehydrogenase complex, subunit A, flavoprotein (Fp) [Source:MGI Symbol;Acc:MGI:1914195]	48	25	25	60	664	72.5	7.37	1.05365	1.11612	0.944034	0.644587
ENSMUSP00000080302	phosphoglycerate kinase 1	Pgk1	pep chromosome:GRCm39:X:105230706:105247305:1 gene:ENSMUSG00000062070.13 transcript:ENSMUST00000081593.13 gene_biotype:protein_coding transcript_biotype:protein_coding gene_symbol:Pgk1 description:phosphoglycerate kinase 1 [Source:MGI Symbol;Acc:MGI:97555]	69	19	24	76	417	44.5	7.9	1.08629	0.988406	1.09903	0.574773
ENSMUSP00000128249	radixin	Rdx	pep chromosome:GRCm39:9:51958473:52000035:1 gene:ENSMUSG00000032050.19 transcript:ENSMUST00000163153.9 gene_biotype:protein_coding transcript_biotype:protein_coding gene_symbol:Rdx description:radixin [Source:MGI Symbol;Acc:MGI:97887]	44	18	32	82	583	68.5	6.2	0.984762	0.904622	1.08859	0.616991
ENSMUSP00000022629	dihydropyrimidinase-like 2	Dpysl2	pep chromosome:GRCm39:14:67040313:67106137:-1 gene:ENSMUSG00000022048.9 transcript:ENSMUST00000022629.9 gene_biotype:protein_coding transcript_biotype:protein_coding gene_symbol:Dpysl2 description:dihydropyrimidinase-like 2 [Source:MGI Symbol;Acc:MGI:1349763]	51	19	19	50	572	62.2	6.38	0.946653	0.840863	1.12581	0.474775
ENSMUSP00000021062	DEAD box helicase 5	Ddx5	pep chromosome:GRCm39:11:106671181:106679358:-1 gene:ENSMUSG00000020719.15 transcript:ENSMUST00000021062.12 gene_biotype:protein_coding transcript_biotype:protein_coding gene_symbol:Ddx5 description:DEAD box helicase 5 [Source:MGI Symbol;Acc:MGI:105037]	42	22	29	67	615	69.2	8.92	1.00446	0.907114	1.10731	0.54254
ENSMUSP00000076521	protein disulfide isomerase associated 4	Pdia4	pep chromosome:GRCm39:6:47773075:47790364:-1 gene:ENSMUSG00000025823.10 transcript:ENSMUST00000077290.9 gene_biotype:protein_coding transcript_biotype:protein_coding gene_symbol:Pdia4 description:protein disulfide isomerase associated 4 [Source:MGI Symbol;Acc:MGI:104864]	41	26	26	70	641	72.3	5.22	0.980914	0.962714	1.0189	0.937949
ENSMUSP00000001460	staphylococcal nuclease and tudor domain containing 1	Snd1	pep chromosome:GRCm39:6:28480347:28888831:1 gene:ENSMUSG00000001424.15 transcript:ENSMUST00000001460.14 gene_biotype:protein_coding transcript_biotype:protein_coding gene_symbol:Snd1 description:staphylococcal nuclease and tudor domain containing 1 [Source:MGI Symbol;Acc:MGI:1929266]	37	33	33	67	910	102	7.43	1.23117	1.08957	1.12996	0.460372
ENSMUSP00000018875	adaptor-related protein complex 2, beta 1 subunit	Ap2b1	pep chromosome:GRCm39:11:83193309:83295861:1 gene:ENSMUSG00000035152.15 transcript:ENSMUST00000018875.13 gene_biotype:protein_coding transcript_biotype:protein_coding gene_symbol:Ap2b1 description:adaptor-related protein complex 2, beta 1 subunit [Source:MGI Symbol;Acc:MGI:1919020]	30	15	30	69	951	105.7	5.34	1.00705	1.08486	0.928275	0.560302
ENSMUSP00000147928	ribonuclease/angiogenin inhibitor 1	Rnh1	pep chromosome:GRCm39:7:140740239:140748602:-1 gene:ENSMUSG00000038650.16 transcript:ENSMUST00000210314.2 gene_biotype:protein_coding transcript_biotype:protein_coding gene_symbol:Rnh1 description:ribonuclease/angiogenin inhibitor 1 [Source:MGI Symbol;Acc:MGI:1195456]	57	20	20	66	492	53.9	5.01	1.08923	1.10548	0.985301	0.877993
ENSMUSP00000084887	myosin IF	Myo1f	pep chromosome:GRCm39:17:33774681:33826736:1 gene:ENSMUSG00000024300.18 transcript:ENSMUST00000087605.13 gene_biotype:protein_coding transcript_biotype:protein_coding gene_symbol:Myo1f description:myosin IF [Source:MGI Symbol;Acc:MGI:107711]	32	30	34	60	1098	125.1	9.17	1.00686	0.905267	1.11223	0.523966
ENSMUSP00000057291	lamin B2	Lmnb2	pep chromosome:GRCm39:10:80737037:80754079:-1 gene:ENSMUSG00000062075.14 transcript:ENSMUST00000057623.14 gene_biotype:protein_coding transcript_biotype:protein_coding gene_symbol:Lmnb2 description:lamin B2 [Source:MGI Symbol;Acc:MGI:96796]	48	26	32	55	615	69	5.55	1.02138	1.13957	0.896289	0.403924
ENSMUSP00000059033	huntingtin interacting protein 1	Hip1	pep chromosome:GRCm39:5:135435385:135573969:-1 gene:ENSMUSG00000039959.14 transcript:ENSMUST00000060311.12 gene_biotype:protein_coding transcript_biotype:protein_coding gene_symbol:Hip1 description:huntingtin interacting protein 1 [Source:MGI Symbol;Acc:MGI:1099804]	35	34	35	44	1029	115.1	5.43	1.00968	1.03146	0.978887	0.841092
ENSMUSP00000032143	ribophorin I	Rpn1	pep chromosome:GRCm39:6:88061464:88082286:1 gene:ENSMUSG00000030062.8 transcript:ENSMUST00000032143.8 gene_biotype:protein_coding transcript_biotype:protein_coding gene_symbol:Rpn1 description:ribophorin I [Source:MGI Symbol;Acc:MGI:98084]	48	28	28	71	608	68.5	6.46	1.16688	1.16271	1.00359	0.983051
ENSMUSP00000034121	mannosidase 2, alpha B1	Man2b1	pep chromosome:GRCm39:8:85809944:85824911:1 gene:ENSMUSG00000005142.11 transcript:ENSMUST00000034121.11 gene_biotype:protein_coding transcript_biotype:protein_coding gene_symbol:Man2b1 description:mannosidase 2, alpha B1 [Source:MGI Symbol;Acc:MGI:107286]	27	25	25	55	1013	114.6	8.13	1.1364	1.07802	1.05415	0.76805
ENSMUSP00000053943	brain abundant, membrane attached signal protein 1	Basp1	pep chromosome:GRCm39:15:25363363:25413850:-1 gene:ENSMUSG00000045763.9 transcript:ENSMUST00000058845.9 gene_biotype:protein_coding transcript_biotype:protein_coding gene_symbol:Basp1 description:brain abundant, membrane attached signal protein 1 [Source:MGI Symbol;Acc:MGI:1917600]	85	16	16	60	226	22.1	4.51	1.37894	1.2187	1.13148	0.455176
ENSMUSP00000144561	gelsolin	Gsn	pep chromosome:GRCm39:2:35146392:35197902:1 gene:ENSMUSG00000026879.15 transcript:ENSMUST00000201185.4 gene_biotype:protein_coding transcript_biotype:protein_coding gene_symbol:Gsn description:gelsolin [Source:MGI Symbol;Acc:MGI:95851]	44	27	27	77	731	80.7	5.76	1.04861	1.0686	0.981291	0.854918
ENSMUSP00000020637	calnexin	Canx	pep chromosome:GRCm39:11:50185294:50216500:-1 gene:ENSMUSG00000020368.16 transcript:ENSMUST00000020637.9 gene_biotype:protein_coding transcript_biotype:protein_coding gene_symbol:Canx description:calnexin [Source:MGI Symbol;Acc:MGI:88261]	41	28	28	65	591	67.2	4.64	1.15823	1.13125	1.02385	0.913381
ENSMUSP00000106318	3-oxoacid CoA transferase 1	Oxct1	pep chromosome:GRCm39:15:4055865:4184826:1 gene:ENSMUSG00000022186.15 transcript:ENSMUST00000110690.9 gene_biotype:protein_coding transcript_biotype:protein_coding gene_symbol:Oxct1 description:3-oxoacid CoA transferase 1 [Source:MGI Symbol;Acc:MGI:1914291]	36	15	15	58	520	56	8.53	1.22792	1.10769	1.10855	0.537835
ENSMUSP00000003461	oxoglutarate (alpha-ketoglutarate) dehydrogenase (lipoamide)	Ogdh	pep chromosome:GRCm39:11:6241633:6306642:1 gene:ENSMUSG00000020456.18 transcript:ENSMUST00000003461.15 gene_biotype:protein_coding transcript_biotype:protein_coding gene_symbol:Ogdh description:oxoglutarate (alpha-ketoglutarate) dehydrogenase (lipoamide) [Source:MGI Symbol;Acc:MGI:1098267]	31	28	28	59	1023	116.4	6.83	1.07398	1.11885	0.959903	0.732823
ENSMUSP00000042457	eukaryotic translation elongation factor 1 alpha 1	Eef1a1	pep chromosome:GRCm39:9:78385731:78389006:-1 gene:ENSMUSG00000037742.15 transcript:ENSMUST00000042235.15 gene_biotype:protein_coding transcript_biotype:protein_coding gene_symbol:Eef1a1 description:eukaryotic translation elongation factor 1 alpha 1 [Source:MGI Symbol;Acc:MGI:1096881]	51	10	19	71	462	50.1	9.01	1.0705	1.01672	1.05291	0.773826
ENSMUSP00000003912	calreticulin	Calr	pep chromosome:GRCm39:8:85568479:85573563:-1 gene:ENSMUSG00000003814.9 transcript:ENSMUST00000003912.7 gene_biotype:protein_coding transcript_biotype:protein_coding gene_symbol:Calr description:calreticulin [Source:MGI Symbol;Acc:MGI:88252]	53	21	21	78	416	48	4.49	1.19059	1.22792	0.969591	0.787827
ENSMUSP00000003459	myosin IG	Myo1g	pep chromosome:GRCm39:11:6456548:6470958:-1 gene:ENSMUSG00000020437.13 transcript:ENSMUST00000003459.4 gene_biotype:protein_coding transcript_biotype:protein_coding gene_symbol:Myo1g description:myosin IG [Source:MGI Symbol;Acc:MGI:1927091]	35	30	32	53	1024	117.2	8.59	1.11183	1.12461	0.988635	0.897188
ENSMUSP00000068594	hypoxia up-regulated 1	Hyou1	pep chromosome:GRCm39:9:44290787:44303666:1 gene:ENSMUSG00000032115.15 transcript:ENSMUST00000066601.13 gene_biotype:protein_coding transcript_biotype:protein_coding gene_symbol:Hyou1 description:hypoxia up-regulated 1 [Source:MGI Symbol;Acc:MGI:108030]	32	30	30	62	999	111.1	5.19	1.11766	1.03373	1.08119	0.64796
ENSMUSP00000027438	nucleolin	Ncl	pep chromosome:GRCm39:1:86272441:86287122:-1 gene:ENSMUSG00000026234.13 transcript:ENSMUST00000027438.8 gene_biotype:protein_coding transcript_biotype:protein_coding gene_symbol:Ncl description:nucleolin [Source:MGI Symbol;Acc:MGI:97286]	38	31	31	80	707	76.7	4.75	1.15765	1.23649	0.936235	0.602389
ENSMUSP00000003038	adaptor-related protein complex 2, alpha 2 subunit	Ap2a2	pep chromosome:GRCm39:7:141142086:141212924:1 gene:ENSMUSG00000002957.12 transcript:ENSMUST00000003038.12 gene_biotype:protein_coding transcript_biotype:protein_coding gene_symbol:Ap2a2 description:adaptor-related protein complex 2, alpha 2 subunit [Source:MGI Symbol;Acc:MGI:101920]	33	20	32	60	938	104	6.93	1.02808	1.04054	0.988022	0.893661
ENSMUSP00000086626	ubiquitin-like modifier activating enzyme 1	Uba1	pep chromosome:GRCm39:X:20524565:20549418:1 gene:ENSMUSG00000001924.16 transcript:ENSMUST00000089217.11 gene_biotype:protein_coding transcript_biotype:protein_coding gene_symbol:Uba1 description:ubiquitin-like modifier activating enzyme 1 [Source:MGI Symbol;Acc:MGI:98890]	33	29	29	54	1058	117.7	5.66	0.961056	0.924936	1.03905	0.839264
ENSMUSP00000005234	WD repeat domain 1	Wdr1	pep chromosome:GRCm39:5:38684156:38719149:-1 gene:ENSMUSG00000005103.13 transcript:ENSMUST00000005234.13 gene_biotype:protein_coding transcript_biotype:protein_coding gene_symbol:Wdr1 description:WD repeat domain 1 [Source:MGI Symbol;Acc:MGI:1337100]	49	24	24	66	606	66.4	6.6	1.11374	1.07124	1.03968	0.836275
ENSMUSP00000095433	ubiquitin protein ligase E3 component n-recognin 4	Ubr4	pep chromosome:GRCm39:4:139107970:139216899:1 gene:ENSMUSG00000066036.15 transcript:ENSMUST00000097822.10 gene_biotype:protein_coding transcript_biotype:protein_coding gene_symbol:Ubr4 description:ubiquitin protein ligase E3 component n-recognin 4 [Source:MGI Symbol;Acc:MGI:1916366]	8	39	39	42	5180	571.9	6.06	0.970079	0.964671	1.00561	0.994596
ENSMUSP00000083077	ATPase, Na+/K+ transporting, alpha 2 polypeptide	Atp1a2	pep chromosome:GRCm39:1:172099276:172125631:-1 gene:ENSMUSG00000007097.15 transcript:ENSMUST00000085913.11 gene_biotype:protein_coding transcript_biotype:protein_coding gene_symbol:Atp1a2 description:ATPase, Na+/K+ transporting, alpha 2 polypeptide [Source:MGI Symbol;Acc:MGI:88106]	23	1	18	72	1020	112.1	5.55	0.964648	1.21691	0.792705	0.0857804
ENSMUSP00000025546	CNDP dipeptidase 2 (metallopeptidase M20 family)	Cndp2	pep chromosome:GRCm39:18:84685590:84703827:-1 gene:ENSMUSG00000024644.18 transcript:ENSMUST00000025546.17 gene_biotype:protein_coding transcript_biotype:protein_coding gene_symbol:Cndp2 description:CNDP dipeptidase 2 (metallopeptidase M20 family) [Source:MGI Symbol;Acc:MGI:1913304]	52	19	19	55	475	52.7	5.66	0.980401	1.03882	0.943768	0.643136
ENSMUSP00000045841	glutamyl-prolyl-tRNA synthetase	Eprs	pep chromosome:GRCm39:1:185095241:185160557:1 gene:ENSMUSG00000026615.15 transcript:ENSMUST00000046514.13 gene_biotype:protein_coding transcript_biotype:protein_coding gene_symbol:Eprs description:glutamyl-prolyl-tRNA synthetase [Source:MGI Symbol;Acc:MGI:97838]	21	29	30	46	1512	170	7.66	0.956958	0.992407	0.96428	0.757588
ENSMUSP00000021306	elongation factor Tu GTP binding domain containing 2	Eftud2	pep chromosome:GRCm39:11:102729299:102771793:-1 gene:ENSMUSG00000020929.15 transcript:ENSMUST00000021306.14 gene_biotype:protein_coding transcript_biotype:protein_coding gene_symbol:Eftud2 description:elongation factor Tu GTP binding domain containing 2 [Source:MGI Symbol;Acc:MGI:1336880]	34	26	27	54	972	109.4	5	1.07895	0.953761	1.13126	0.45594
ENSMUSP00000003310	RAN binding protein 2	Ranbp2	pep chromosome:GRCm39:10:58282744:58330178:1 gene:ENSMUSG00000003226.8 transcript:ENSMUST00000003310.7 gene_biotype:protein_coding transcript_biotype:protein_coding gene_symbol:Ranbp2 description:RAN binding protein 2 [Source:MGI Symbol;Acc:MGI:894323]	10	33	35	50	3053	340.9	6.18	1.02649	1.05385	0.974035	0.813245
ENSMUSP00000027833	coatomer protein complex subunit alpha	Copa	pep chromosome:GRCm39:1:171910399:171949897:1 gene:ENSMUSG00000026553.18 transcript:ENSMUST00000027833.12 gene_biotype:protein_coding transcript_biotype:protein_coding gene_symbol:Copa description:coatomer protein complex subunit alpha [Source:MGI Symbol;Acc:MGI:1334462]	27	36	36	57	1233	139.3	7.58	0.933401	1.02516	0.910497	0.470605
ENSMUSP00000027111	NADH:ubiquinone oxidoreductase core subunit S1	Ndufs1	pep chromosome:GRCm39:1:63182755:63215981:-1 gene:ENSMUSG00000025968.17 transcript:ENSMUST00000027111.15 gene_biotype:protein_coding transcript_biotype:protein_coding gene_symbol:Ndufs1 description:NADH:ubiquinone oxidoreductase core subunit S1 [Source:MGI Symbol;Acc:MGI:2443241]	43	24	25	59	727	79.7	5.72	1.09512	0.984675	1.11217	0.524188
ENSMUSP00000000804	DEAD box helicase 3, X-linked	Ddx3x	pep chromosome:GRCm39:X:13147209:13160291:1 gene:ENSMUSG00000000787.13 transcript:ENSMUST00000000804.7 gene_biotype:protein_coding transcript_biotype:protein_coding gene_symbol:Ddx3x description:DEAD box helicase 3, X-linked [Source:MGI Symbol;Acc:MGI:103064]	40	25	26	56	662	73.1	7.18	0.994916	1.03907	0.957509	0.719344
ENSMUSP00000035033	coatomer protein complex, subunit beta 2 (beta prime)	Copb2	pep chromosome:GRCm39:9:98445784:98470435:1 gene:ENSMUSG00000032458.7 transcript:ENSMUST00000035033.7 gene_biotype:protein_coding transcript_biotype:protein_coding gene_symbol:Copb2 description:coatomer protein complex, subunit beta 2 (beta prime) [Source:MGI Symbol;Acc:MGI:1354962]	36	31	31	56	905	102.4	5.3	0.963198	1.05745	0.910866	0.472401
ENSMUSP00000101862	CAP, adenylate cyclase-associated protein 1 (yeast)	Cap1	pep chromosome:GRCm39:4:122752840:122779837:-1 gene:ENSMUSG00000028656.15 transcript:ENSMUST00000106255.8 gene_biotype:protein_coding transcript_biotype:protein_coding gene_symbol:Cap1 description:CAP, adenylate cyclase-associated protein 1 (yeast) [Source:MGI Symbol;Acc:MGI:88262]	47	19	19	53	474	51.5	7.52	1.06026	1.07428	0.986951	0.887493
ENSMUSP00000019323	malate dehydrogenase 2, NAD (mitochondrial)	Mdh2	pep chromosome:GRCm39:5:135807334:135819245:1 gene:ENSMUSG00000019179.11 transcript:ENSMUST00000019323.11 gene_biotype:protein_coding transcript_biotype:protein_coding gene_symbol:Mdh2 description:malate dehydrogenase 2, NAD (mitochondrial) [Source:MGI Symbol;Acc:MGI:97050]	57	16	16	58	338	35.6	8.68	1.22539	1.28682	0.952256	0.689959
ENSMUSP00000028167	glycerol phosphate dehydrogenase 2, mitochondrial	Gpd2	pep chromosome:GRCm39:2:57128394:57260731:1 gene:ENSMUSG00000026827.13 transcript:ENSMUST00000028167.3 gene_biotype:protein_coding transcript_biotype:protein_coding gene_symbol:Gpd2 description:glycerol phosphate dehydrogenase 2, mitochondrial [Source:MGI Symbol;Acc:MGI:99778]	47	29	29	59	727	80.9	6.61	0.958806	0.992188	0.966355	0.769383
ENSMUSP00000022196	adaptor-related protein complex 3, beta 1 subunit	Ap3b1	pep chromosome:GRCm39:13:94495468:94702825:1 gene:ENSMUSG00000021686.7 transcript:ENSMUST00000022196.5 gene_biotype:protein_coding transcript_biotype:protein_coding gene_symbol:Ap3b1 description:adaptor-related protein complex 3, beta 1 subunit [Source:MGI Symbol;Acc:MGI:1333879]	26	32	32	66	1105	122.7	5.66	0.981274	1.03337	0.949585	0.675131
ENSMUSP00000108011	chromodomain helicase DNA binding protein 4	Chd4	pep chromosome:GRCm39:6:125072944:125107548:1 gene:ENSMUSG00000063870.13 transcript:ENSMUST00000112392.8 gene_biotype:protein_coding transcript_biotype:protein_coding gene_symbol:Chd4 description:chromodomain helicase DNA binding protein 4 [Source:MGI Symbol;Acc:MGI:1344380]	17	25	30	39	1902	216.2	5.92	1.08592	1.06281	1.02174	0.923845
ENSMUSP00000001809	poly(A) binding protein, cytoplasmic 1	Pabpc1	pep chromosome:GRCm39:15:36595905:36609217:-1 gene:ENSMUSG00000022283.16 transcript:ENSMUST00000001809.15 gene_biotype:protein_coding transcript_biotype:protein_coding gene_symbol:Pabpc1 description:poly(A) binding protein, cytoplasmic 1 [Source:MGI Symbol;Acc:MGI:1349722]	36	17	23	55	636	70.6	9.5	1.0421	1.06072	0.98244	0.861525
ENSMUSP00000035086	programmed cell death 6 interacting protein	Pdcd6ip	pep chromosome:GRCm39:9:113480812:113537327:-1 gene:ENSMUSG00000032504.16 transcript:ENSMUST00000035086.13 gene_biotype:protein_coding transcript_biotype:protein_coding gene_symbol:Pdcd6ip description:programmed cell death 6 interacting protein [Source:MGI Symbol;Acc:MGI:1333753]	32	30	30	52	869	96	6.52	1.11286	1.07056	1.03951	0.837062
ENSMUSP00000151431	utrophin	Utrn	pep chromosome:GRCm39:10:12259124:12745109:-1 gene:ENSMUSG00000019820.12 transcript:ENSMUST00000218635.2 gene_biotype:protein_coding transcript_biotype:protein_coding gene_symbol:Utrn description:utrophin [Source:MGI Symbol;Acc:MGI:104631]	10	32	32	35	3430	392.5	5.33	0.954522	0.959002	0.995328	0.9357
ENSMUSP00000006435	ATPase, H+ transporting, lysosomal V1 subunit B2	Atp6v1b2	pep chromosome:GRCm39:8:69541298:69566363:1 gene:ENSMUSG00000006273.15 transcript:ENSMUST00000006435.8 gene_biotype:protein_coding transcript_biotype:protein_coding gene_symbol:Atp6v1b2 description:ATPase, H+ transporting, lysosomal V1 subunit B2 [Source:MGI Symbol;Acc:MGI:109618]	51	21	21	51	511	56.5	5.81	1.19291	1.10981	1.07488	0.675071
ENSMUSP00000077099	dedicator of cytokinesis 10	Dock10	pep chromosome:GRCm39:1:80478790:80736165:-1 gene:ENSMUSG00000038608.16 transcript:ENSMUST00000077946.12 gene_biotype:protein_coding transcript_biotype:protein_coding gene_symbol:Dock10 description:dedicator of cytokinesis 10 [Source:MGI Symbol;Acc:MGI:2146320]	12	27	27	41	2187	249.4	7.09	0.999534	0.995149	1.00441	0.987745
ENSMUSP00000095316	isocitrate dehydrogenase 1 (NADP+), soluble	Idh1	pep chromosome:GRCm39:1:65197775:65218340:-1 gene:ENSMUSG00000025950.17 transcript:ENSMUST00000097709.11 gene_biotype:protein_coding transcript_biotype:protein_coding gene_symbol:Idh1 description:isocitrate dehydrogenase 1 (NADP+), soluble [Source:MGI Symbol;Acc:MGI:96413]	43	17	19	53	414	46.6	7.17	1.05227	0.949289	1.10848	0.538082
ENSMUSP00000113942	glyceraldehyde-3-phosphate dehydrogenase	Gapdh	pep chromosome:GRCm39:6:125138816:125143430:-1 gene:ENSMUSG00000057666.19 transcript:ENSMUST00000117757.9 gene_biotype:protein_coding transcript_biotype:protein_coding gene_symbol:Gapdh description:glyceraldehyde-3-phosphate dehydrogenase [Source:MGI Symbol;Acc:MGI:95640]	55	15	15	77	359	38.6	8.97	0.978911	0.958407	1.02139	0.925567
ENSMUSP00000096753	nicotinamide nucleotide transhydrogenase	Nnt	pep chromosome:GRCm39:13:119471984:119545533:-1 gene:ENSMUSG00000025453.19 transcript:ENSMUST00000099149.10 gene_biotype:protein_coding transcript_biotype:protein_coding gene_symbol:Nnt description:nicotinamide nucleotide transhydrogenase [Source:MGI Symbol;Acc:MGI:109279]	25	21	21	46	835	87.4	7.74	1.31497	1.10592	1.18903	0.287577
ENSMUSP00000079991	phospholipase C, gamma 2	Plcg2	pep chromosome:GRCm39:8:118225030:118361881:1 gene:ENSMUSG00000034330.11 transcript:ENSMUST00000081232.9 gene_biotype:protein_coding transcript_biotype:protein_coding gene_symbol:Plcg2 description:phospholipase C, gamma 2 [Source:MGI Symbol;Acc:MGI:97616]	23	32	32	43	1265	147.5	6.77	0.970109	0.974917	0.995068	0.934202
ENSMUSP00000025955	eukaryotic translation initiation factor 3, subunit A	Eif3a	pep chromosome:GRCm39:19:60749555:60779081:-1 gene:ENSMUSG00000024991.9 transcript:ENSMUST00000025955.8 gene_biotype:protein_coding transcript_biotype:protein_coding gene_symbol:Eif3a description:eukaryotic translation initiation factor 3, subunit A [Source:MGI Symbol;Acc:MGI:95301]	24	34	34	47	1344	161.8	6.77	0.940992	0.986364	0.954	0.699685
ENSMUSP00000025083	kinesin family member 5B	Kif5b	pep chromosome:GRCm39:18:6201002:6241523:-1 gene:ENSMUSG00000006740.15 transcript:ENSMUST00000025083.14 gene_biotype:protein_coding transcript_biotype:protein_coding gene_symbol:Kif5b description:kinesin family member 5B [Source:MGI Symbol;Acc:MGI:1098268]	30	29	29	39	963	109.5	6.44	0.968192	0.983207	0.984729	0.8747
ENSMUSP00000099364	N-ethylmaleimide sensitive fusion protein	Nsf	pep chromosome:GRCm39:11:103712608:103844882:-1 gene:ENSMUSG00000034187.19 transcript:ENSMUST00000103075.11 gene_biotype:protein_coding transcript_biotype:protein_coding gene_symbol:Nsf description:N-ethylmaleimide sensitive fusion protein [Source:MGI Symbol;Acc:MGI:104560]	36	27	28	63	744	82.6	6.95	1.11203	1.079	1.03061	0.880152
ENSMUSP00000020673	voltage-dependent anion channel 1	Vdac1	pep chromosome:GRCm39:11:52265090:52279350:1 gene:ENSMUSG00000020402.12 transcript:ENSMUST00000020673.3 gene_biotype:protein_coding transcript_biotype:protein_coding gene_symbol:Vdac1 description:voltage-dependent anion channel 1 [Source:MGI Symbol;Acc:MGI:106919]	71	17	18	39	296	32.3	8.43	1.45128	1.3171	1.10188	0.563544
ENSMUSP00000152454	guanosine diphosphate (GDP) dissociation inhibitor 2	Gdi2	pep chromosome:GRCm39:13:3588063:3617871:1 gene:ENSMUSG00000021218.11 transcript:ENSMUST00000223396.2 gene_biotype:protein_coding transcript_biotype:protein_coding gene_symbol:Gdi2 description:guanosine diphosphate (GDP) dissociation inhibitor 2 [Source:MGI Symbol;Acc:MGI:99845]	48	17	20	50	445	50.5	6.25	0.952186	0.877295	1.08537	0.63038
ENSMUSP00000022529	transketolase	Tkt	pep chromosome:GRCm39:14:30271088:30296677:1 gene:ENSMUSG00000021957.8 transcript:ENSMUST00000022529.8 gene_biotype:protein_coding transcript_biotype:protein_coding gene_symbol:Tkt description:transketolase [Source:MGI Symbol;Acc:MGI:105992]	44	22	22	65	623	67.6	7.5	0.942038	1.04679	0.899927	0.420532
ENSMUSP00000121203	cathepsin D	Ctsd	pep chromosome:GRCm39:7:141929648:141941775:-1 gene:ENSMUSG00000007891.17 transcript:ENSMUST00000151120.9 gene_biotype:protein_coding transcript_biotype:protein_coding gene_symbol:Ctsd description:cathepsin D [Source:MGI Symbol;Acc:MGI:88562]	44	15	15	93	410	44.9	7.15	0.794814	0.852424	0.932416	0.582066
ENSMUSP00000017629	topoisomerase (DNA) II beta	Top2b	pep chromosome:GRCm39:14:6034301:6104584:-1 gene:ENSMUSG00000017485.12 transcript:ENSMUST00000017629.12 gene_biotype:protein_coding transcript_biotype:protein_coding gene_symbol:Top2b description:topoisomerase (DNA) II beta [Source:MGI Symbol;Acc:MGI:98791]	19	32	32	50	1612	181.8	8.29	1.11138	1.05939	1.04907	0.791717
ENSMUSP00000024866	xanthine dehydrogenase	Xdh	pep chromosome:GRCm39:17:74190890:74257177:-1 gene:ENSMUSG00000024066.10 transcript:ENSMUST00000024866.6 gene_biotype:protein_coding transcript_biotype:protein_coding gene_symbol:Xdh description:xanthine dehydrogenase [Source:MGI Symbol;Acc:MGI:98973]	21	26	26	46	1335	146.5	7.56	0.965305	0.916108	1.0537	0.770126
ENSMUSP00000081141	phosphogluconate dehydrogenase	Pgd	pep chromosome:GRCm39:4:149234448:149251164:-1 gene:ENSMUSG00000028961.16 transcript:ENSMUST00000084124.7 gene_biotype:protein_coding transcript_biotype:protein_coding gene_symbol:Pgd description:phosphogluconate dehydrogenase [Source:MGI Symbol;Acc:MGI:97553]	39	17	17	62	483	53.2	7.23	0.956655	1.01009	0.947102	0.661424
ENSMUSP00000038135	DEAH (Asp-Glu-Ala-His) box polypeptide 9	Dhx9	pep chromosome:GRCm39:1:153331504:153363406:-1 gene:ENSMUSG00000042699.12 transcript:ENSMUST00000042141.12 gene_biotype:protein_coding transcript_biotype:protein_coding gene_symbol:Dhx9 description:DEAH (Asp-Glu-Ala-His) box polypeptide 9 [Source:MGI Symbol;Acc:MGI:108177]	20	24	24	62	1384	149.6	6.83	0.989261	1.03988	0.951321	0.684759
ENSMUSP00000152229	pitrilysin metallepetidase 1	Pitrm1	pep chromosome:GRCm39:13:6598187:6630551:1 gene:ENSMUSG00000021193.11 transcript:ENSMUST00000222485.2 gene_biotype:protein_coding transcript_biotype:protein_coding gene_symbol:Pitrm1 description:pitrilysin metallepetidase 1 [Source:MGI Symbol;Acc:MGI:1916867]	31	32	32	57	1036	117.3	7.2	1.2053	1.05849	1.13869	0.431073
ENSMUSP00000107192	CAP-GLY domain containing linker protein 1	Clip1	pep chromosome:GRCm39:5:123715858:123822681:-1 gene:ENSMUSG00000049550.18 transcript:ENSMUST00000111566.9 gene_biotype:protein_coding transcript_biotype:protein_coding gene_symbol:Clip1 description:CAP-GLY domain containing linker protein 1 [Source:MGI Symbol;Acc:MGI:1928401]	22	1	29	36	1391	155.7	5.24	1.0097	0.909143	1.1106	0.530066
ENSMUSP00000153168	kinesin family member 13B	Kif13b	pep chromosome:GRCm39:14:64890051:65047066:1 gene:ENSMUSG00000060012.10 transcript:ENSMUST00000224503.2 gene_biotype:protein_coding transcript_biotype:protein_coding gene_symbol:Kif13b description:kinesin family member 13B [Source:MGI Symbol;Acc:MGI:1098265]	18	29	31	39	1847	204.8	5.8	0.907787	0.91673	0.990244	0.906452
ENSMUSP00000032629	cytoplasmic FMR1 interacting protein 1	Cyfip1	pep chromosome:GRCm39:7:55491819:55582350:1 gene:ENSMUSG00000030447.16 transcript:ENSMUST00000032629.16 gene_biotype:protein_coding transcript_biotype:protein_coding gene_symbol:Cyfip1 description:cytoplasmic FMR1 interacting protein 1 [Source:MGI Symbol;Acc:MGI:1338801]	23	14	27	49	1253	145.1	6.9	0.969161	0.855079	1.13342	0.448628
ENSMUSP00000034097	glutamatic-oxaloacetic transaminase 2, mitochondrial	Got2	pep chromosome:GRCm39:8:96590762:96615175:-1 gene:ENSMUSG00000031672.9 transcript:ENSMUST00000034097.8 gene_biotype:protein_coding transcript_biotype:protein_coding gene_symbol:Got2 description:glutamatic-oxaloacetic transaminase 2, mitochondrial [Source:MGI Symbol;Acc:MGI:95792]	41	20	20	52	430	47.4	9	1.19503	1.52303	0.784641	0.0731902
ENSMUSP00000000137	ARP2 actin-related protein 2	Actr2	pep chromosome:GRCm39:11:20012304:20062913:-1 gene:ENSMUSG00000020152.8 transcript:ENSMUST00000000137.8 gene_biotype:protein_coding transcript_biotype:protein_coding gene_symbol:Actr2 description:ARP2 actin-related protein 2 [Source:MGI Symbol;Acc:MGI:1913963]	36	13	13	62	394	44.7	6.74	1.04487	1.0111	1.0334	0.866551
ENSMUSP00000109451	actin related protein 2/3 complex, subunit 2	Arpc2	pep chromosome:GRCm39:1:74275656:74307368:1 gene:ENSMUSG00000006304.15 transcript:ENSMUST00000113820.9 gene_biotype:protein_coding transcript_biotype:protein_coding gene_symbol:Arpc2 description:actin related protein 2/3 complex, subunit 2 [Source:MGI Symbol;Acc:MGI:1923959]	49	16	16	64	300	34.3	7.36	1.15025	1.00882	1.14019	0.42618
ENSMUSP00000122474	T cell, immune regulator 1, ATPase, H+ transporting, lysosomal V0 protein A3	Tcirg1	pep chromosome:GRCm39:19:3946050:3955230:-1 gene:ENSMUSG00000001750.17 transcript:ENSMUST00000145791.8 gene_biotype:protein_coding transcript_biotype:protein_coding gene_symbol:Tcirg1 description:T cell, immune regulator 1, ATPase, H+ transporting, lysosomal V0 protein A3 [Source:MGI Symbol;Acc:MGI:1350931]	31	20	21	52	834	93.4	6.38	1.21977	1.13451	1.07515	0.673861
ENSMUSP00000031382	CAP-GLY domain containing linker protein 1	Clip1	pep chromosome:GRCm39:5:123717307:123794081:-1 gene:ENSMUSG00000049550.18 transcript:ENSMUST00000031382.14 gene_biotype:protein_coding transcript_biotype:protein_coding gene_symbol:Clip1 description:CAP-GLY domain containing linker protein 1 [Source:MGI Symbol;Acc:MGI:1928401]	21	1	29	36	1437	161.1	5.24	1.02101	0.982557	1.03914	0.838849
ENSMUSP00000045073	splicing factor 3b, subunit 3	Sf3b3	pep chromosome:GRCm39:8:111536871:111573408:-1 gene:ENSMUSG00000033732.11 transcript:ENSMUST00000042012.7 gene_biotype:protein_coding transcript_biotype:protein_coding gene_symbol:Sf3b3 description:splicing factor 3b, subunit 3 [Source:MGI Symbol;Acc:MGI:1289341]	25	27	27	43	1217	135.5	5.26	1.0022	1.04739	0.956855	0.715669
ENSMUSP00000087457	integrin beta 1 (fibronectin receptor beta)	Itgb1	pep chromosome:GRCm39:8:129412135:129459681:1 gene:ENSMUSG00000025809.16 transcript:ENSMUST00000090006.12 gene_biotype:protein_coding transcript_biotype:protein_coding gene_symbol:Itgb1 description:integrin beta 1 (fibronectin receptor beta) [Source:MGI Symbol;Acc:MGI:96610]	26	20	20	51	798	88.2	5.94	1.00699	0.923854	1.08998	0.611252
ENSMUSP00000084572	valyl-tRNA synthetase	Vars	pep chromosome:GRCm39:17:35219963:35235298:1 gene:ENSMUSG00000007029.17 transcript:ENSMUST00000087315.14 gene_biotype:protein_coding transcript_biotype:protein_coding gene_symbol:Vars description:valyl-tRNA synthetase [Source:MGI Symbol;Acc:MGI:90675]	25	24	24	38	1263	140.1	7.77	0.9016	0.9566	0.942504	0.636242
ENSMUSP00000099411	transglutaminase 2, C polypeptide	Tgm2	pep chromosome:GRCm39:2:157958322:157988356:-1 gene:ENSMUSG00000037820.16 transcript:ENSMUST00000103122.10 gene_biotype:protein_coding transcript_biotype:protein_coding gene_symbol:Tgm2 description:transglutaminase 2, C polypeptide [Source:MGI Symbol;Acc:MGI:98731]	34	22	22	41	686	77	5.1	0.903088	0.982094	0.919554	0.515501
ENSMUSP00000133523	chaperonin containing Tcp1, subunit 4 (delta)	Cct4	pep chromosome:GRCm39:11:22940519:22953780:1 gene:ENSMUSG00000007739.11 transcript:ENSMUST00000173867.8 gene_biotype:protein_coding transcript_biotype:protein_coding gene_symbol:Cct4 description:chaperonin containing Tcp1, subunit 4 (delta) [Source:MGI Symbol;Acc:MGI:104689]	50	23	24	45	539	58	8.02	0.929221	0.926818	1.00259	0.977368
ENSMUSP00000030286	dedicator of cytokinesis 7	Dock7	pep chromosome:GRCm39:4:98824908:99009152:-1 gene:ENSMUSG00000028556.16 transcript:ENSMUST00000030286.14 gene_biotype:protein_coding transcript_biotype:protein_coding gene_symbol:Dock7 description:dedicator of cytokinesis 7 [Source:MGI Symbol;Acc:MGI:1914549]	15	31	31	50	2128	241	6.79	0.92861	0.933902	0.994334	0.929985
ENSMUSP00000134023	voltage-dependent anion channel 2	Vdac2	pep chromosome:GRCm39:14:21881634:21895305:1 gene:ENSMUSG00000021771.15 transcript:ENSMUST00000173456.8 gene_biotype:protein_coding transcript_biotype:protein_coding gene_symbol:Vdac2 description:voltage-dependent anion channel 2 [Source:MGI Symbol;Acc:MGI:106915]	69	14	14	45	283	30.4	7.58	1.43292	1.27676	1.12231	0.487154
ENSMUSP00000109305	annexin A4	Anxa4	pep chromosome:GRCm39:6:86713822:86742892:-1 gene:ENSMUSG00000029994.18 transcript:ENSMUST00000113675.8 gene_biotype:protein_coding transcript_biotype:protein_coding gene_symbol:Anxa4 description:annexin A4 [Source:MGI Symbol;Acc:MGI:88030]	69	19	20	54	319	35.9	5.57	1.42276	1.0692	1.33069	0.0747606
ENSMUSP00000076777	tubulin, alpha 1B	Tuba1b	pep chromosome:GRCm39:15:98829306:98832446:-1 gene:ENSMUSG00000023004.9 transcript:ENSMUST00000077577.8 gene_biotype:protein_coding transcript_biotype:protein_coding gene_symbol:Tuba1b description:tubulin, alpha 1B [Source:MGI Symbol;Acc:MGI:107804]	57	1	19	49	451	50.1	5.06	1.02401	1.19135	0.859538	0.256034
ENSMUSP00000004646	coronin, actin binding protein 1C	Coro1c	pep chromosome:GRCm39:5:113980497:114046819:-1 gene:ENSMUSG00000004530.13 transcript:ENSMUST00000004646.13 gene_biotype:protein_coding transcript_biotype:protein_coding gene_symbol:Coro1c description:coronin, actin binding protein 1C [Source:MGI Symbol;Acc:MGI:1345964]	39	20	21	58	474	53.1	7.08	1.214	1.10527	1.09838	0.577351
ENSMUSP00000134734	heterogeneous nuclear ribonucleoprotein L	Hnrnpl	pep chromosome:GRCm39:7:28510362:28521665:1 gene:ENSMUSG00000015165.17 transcript:ENSMUST00000174477.8 gene_biotype:protein_coding transcript_biotype:protein_coding gene_symbol:Hnrnpl description:heterogeneous nuclear ribonucleoprotein L [Source:MGI Symbol;Acc:MGI:104816]	37	16	16	51	615	66.9	8.18	1.05839	1.05699	1.00132	0.970096
ENSMUSP00000096547	SWI/SNF related, matrix associated, actin dependent regulator of chromatin, subfamily a, member 4	Smarca4	pep chromosome:GRCm39:9:21527465:21615526:1 gene:ENSMUSG00000032187.17 transcript:ENSMUST00000098948.10 gene_biotype:protein_coding transcript_biotype:protein_coding gene_symbol:Smarca4 description:SWI/SNF related, matrix associated, actin dependent regulator of chromatin, subfamily a, member 4 [Source:MGI Symbol;Acc:MGI:88192]	17	20	30	40	1617	181.7	8.07	1.04825	0.978877	1.07087	0.692557
ENSMUSP00000123336	histidine ammonia lyase	Hal	pep chromosome:GRCm39:10:93324630:93355166:1 gene:ENSMUSG00000020017.15 transcript:ENSMUST00000129421.8 gene_biotype:protein_coding transcript_biotype:protein_coding gene_symbol:Hal description:histidine ammonia lyase [Source:MGI Symbol;Acc:MGI:96010]	41	21	21	43	657	72.2	6.34	1.06273	0.98505	1.07886	0.657891
ENSMUSP00000032898	importin 5	Ipo5	pep chromosome:GRCm39:14:121148636:121185411:1 gene:ENSMUSG00000030662.11 transcript:ENSMUST00000032898.9 gene_biotype:protein_coding transcript_biotype:protein_coding gene_symbol:Ipo5 description:importin 5 [Source:MGI Symbol;Acc:MGI:1917822]	22	23	23	43	1097	123.5	4.93	0.977699	1.13483	0.861541	0.263108
ENSMUSP00000118169	lectin, galactose binding, soluble 3	Lgals3	pep chromosome:GRCm39:14:47611270:47623617:1 gene:ENSMUSG00000050335.18 transcript:ENSMUST00000142734.8 gene_biotype:protein_coding transcript_biotype:protein_coding gene_symbol:Lgals3 description:lectin, galactose binding, soluble 3 [Source:MGI Symbol;Acc:MGI:96778]	39	11	11	61	264	27.4	8.56	1.14528	1.15492	0.991654	0.914567
ENSMUSP00000033419	dedicator of cytokinesis 11	Dock11	pep chromosome:GRCm39:X:35152485:35340215:1 gene:ENSMUSG00000031093.15 transcript:ENSMUST00000033419.13 gene_biotype:protein_coding transcript_biotype:protein_coding gene_symbol:Dock11 description:dedicator of cytokinesis 11 [Source:MGI Symbol;Acc:MGI:1923224]	16	30	30	35	2073	237.6	7.78	0.9978	0.971759	1.0268	0.898857
ENSMUSP00000139918	tripeptidyl peptidase II	Tpp2	pep chromosome:GRCm39:1:43973175:44042160:1 gene:ENSMUSG00000041763.15 transcript:ENSMUST00000188313.7 gene_biotype:protein_coding transcript_biotype:protein_coding gene_symbol:Tpp2 description:tripeptidyl peptidase II [Source:MGI Symbol;Acc:MGI:102724]	24	29	29	41	1249	138.4	6.38	0.971333	0.965716	1.00582	0.995796
ENSMUSP00000031061	DEAH (Asp-Glu-Ala-His) box polypeptide 15	Dhx15	pep chromosome:GRCm39:5:52307545:52347856:-1 gene:ENSMUSG00000029169.12 transcript:ENSMUST00000031061.12 gene_biotype:protein_coding transcript_biotype:protein_coding gene_symbol:Dhx15 description:DEAH (Asp-Glu-Ala-His) box polypeptide 15 [Source:MGI Symbol;Acc:MGI:1099786]	30	22	22	38	795	90.9	7.46	1.10854	1.06884	1.03714	0.848443
ENSMUSP00000051215	hexokinase 3	Hk3	pep chromosome:GRCm39:13:55153798:55169198:-1 gene:ENSMUSG00000025877.15 transcript:ENSMUST00000052949.13 gene_biotype:protein_coding transcript_biotype:protein_coding gene_symbol:Hk3 description:hexokinase 3 [Source:MGI Symbol;Acc:MGI:2670962]	24	16	18	33	922	100	5.94	0.941992	0.897831	1.04919	0.791176
ENSMUSP00000097444	prolyl endopeptidase	Prep	pep chromosome:GRCm39:10:44943299:45043294:1 gene:ENSMUSG00000019849.12 transcript:ENSMUST00000099858.4 gene_biotype:protein_coding transcript_biotype:protein_coding gene_symbol:Prep description:prolyl endopeptidase [Source:MGI Symbol;Acc:MGI:1270863]	40	24	24	43	710	80.7	5.73	0.87326	0.751487	1.16204	0.359181
ENSMUSP00000004327	glucose-6-phosphate dehydrogenase X-linked	G6pdx	pep chromosome:GRCm39:X:73453089:73472800:-1 gene:ENSMUSG00000031400.11 transcript:ENSMUST00000004327.11 gene_biotype:protein_coding transcript_biotype:protein_coding gene_symbol:G6pdx description:glucose-6-phosphate dehydrogenase X-linked [Source:MGI Symbol;Acc:MGI:105979]	47	17	24	63	515	59.2	6.49	0.914255	0.841361	1.08664	0.625075
ENSMUSP00000037858	fermitin family member 3	Fermt3	pep chromosome:GRCm39:19:6976326:6996837:-1 gene:ENSMUSG00000024965.10 transcript:ENSMUST00000040772.9 gene_biotype:protein_coding transcript_biotype:protein_coding gene_symbol:Fermt3 description:fermitin family member 3 [Source:MGI Symbol;Acc:MGI:2147790]	41	23	23	45	665	75.6	7.05	0.993423	1.09411	0.907972	0.458408
ENSMUSP00000029266	annexin A5	Anxa5	pep chromosome:GRCm39:3:36503072:36530043:-1 gene:ENSMUSG00000027712.14 transcript:ENSMUST00000029266.14 gene_biotype:protein_coding transcript_biotype:protein_coding gene_symbol:Anxa5 description:annexin A5 [Source:MGI Symbol;Acc:MGI:106008]	72	20	21	65	319	35.7	4.96	1.10443	1.00243	1.10176	0.564028
ENSMUSP00000152813	Rho-associated coiled-coil containing protein kinase 2	Rock2	pep chromosome:GRCm39:12:16945168:17028103:1 gene:ENSMUSG00000020580.11 transcript:ENSMUST00000220688.2 gene_biotype:protein_coding transcript_biotype:protein_coding gene_symbol:Rock2 description:Rho-associated coiled-coil containing protein kinase 2 [Source:MGI Symbol;Acc:MGI:107926]	16	19	24	33	1444	166.7	5.9	0.927848	0.896248	1.03526	0.857557
ENSMUSP00000063734	ezrin	Ezr	pep chromosome:GRCm39:17:7005440:7050183:-1 gene:ENSMUSG00000052397.9 transcript:ENSMUST00000064234.7 gene_biotype:protein_coding transcript_biotype:protein_coding gene_symbol:Ezr description:ezrin [Source:MGI Symbol;Acc:MGI:98931]	38	15	27	68	586	69.4	6.1	0.968056	1.10809	0.873623	0.308256
ENSMUSP00000090245	myristoylated alanine rich protein kinase C substrate	Marcks	pep chromosome:GRCm39:10:37009371:37014916:-1 gene:ENSMUSG00000069662.6 transcript:ENSMUST00000092584.6 gene_biotype:protein_coding transcript_biotype:protein_coding gene_symbol:Marcks description:myristoylated alanine rich protein kinase C substrate [Source:MGI Symbol;Acc:MGI:96907]	55	11	11	19	309	29.6	4.34	0.728048	0.686509	1.06051	0.738909
ENSMUSP00000001452	chaperonin containing Tcp1, subunit 3 (gamma)	Cct3	pep chromosome:GRCm39:3:88204423:88229074:1 gene:ENSMUSG00000001416.14 transcript:ENSMUST00000001452.14 gene_biotype:protein_coding transcript_biotype:protein_coding gene_symbol:Cct3 description:chaperonin containing Tcp1, subunit 3 (gamma) [Source:MGI Symbol;Acc:MGI:104708]	40	22	22	46	545	60.6	6.7	0.919233	0.926183	0.992495	0.919409
ENSMUSP00000109552	dynactin 1	Dctn1	pep chromosome:GRCm39:6:83156568:83176952:1 gene:ENSMUSG00000031865.17 transcript:ENSMUST00000113919.10 gene_biotype:protein_coding transcript_biotype:protein_coding gene_symbol:Dctn1 description:dynactin 1 [Source:MGI Symbol;Acc:MGI:107745]	22	24	24	30	1281	141.6	5.9	0.928487	0.851774	1.09006	0.610925
ENSMUSP00000093965	alpha glucosidase 2 alpha neutral subunit	Ganab	pep chromosome:GRCm39:19:8875465:8894036:1 gene:ENSMUSG00000071650.7 transcript:ENSMUST00000096246.5 gene_biotype:protein_coding transcript_biotype:protein_coding gene_symbol:Ganab description:alpha glucosidase 2 alpha neutral subunit [Source:MGI Symbol;Acc:MGI:1097667]	21	24	24	46	966	109.3	6.15	0.991565	1.00086	0.990716	0.909171
ENSMUSP00000050336	cytoskeleton-associated protein 4	Ckap4	pep chromosome:GRCm39:10:84362169:84369926:-1 gene:ENSMUSG00000046841.6 transcript:ENSMUST00000053871.5 gene_biotype:protein_coding transcript_biotype:protein_coding gene_symbol:Ckap4 description:cytoskeleton-associated protein 4 [Source:MGI Symbol;Acc:MGI:2444926]	43	26	26	39	575	63.7	5.64	1.03378	0.993423	1.04062	0.831742
ENSMUSP00000137503	ARP3 actin-related protein 3	Actr3	pep chromosome:GRCm39:1:125320643:125363284:-1 gene:ENSMUSG00000026341.17 transcript:ENSMUST00000178474.8 gene_biotype:protein_coding transcript_biotype:protein_coding gene_symbol:Actr3 description:ARP3 actin-related protein 3 [Source:MGI Symbol;Acc:MGI:1921367]	54	19	19	79	418	47.3	5.88	1.04018	1.00122	1.03892	0.839904
ENSMUSP00000004377	protein tyrosine phosphatase, non-receptor type 6	Ptpn6	pep chromosome:GRCm39:6:124697670:124715588:-1 gene:ENSMUSG00000004266.16 transcript:ENSMUST00000004377.15 gene_biotype:protein_coding transcript_biotype:protein_coding gene_symbol:Ptpn6 description:protein tyrosine phosphatase, non-receptor type 6 [Source:MGI Symbol;Acc:MGI:96055]	40	27	27	48	597	67.7	7.81	0.999847	0.946151	1.05675	0.756062
ENSMUSP00000025337	diaphanous related formin 1	Diaph1	pep chromosome:GRCm39:18:37976656:38068434:-1 gene:ENSMUSG00000024456.17 transcript:ENSMUST00000025337.14 gene_biotype:protein_coding transcript_biotype:protein_coding gene_symbol:Diaph1 description:diaphanous related formin 1 [Source:MGI Symbol;Acc:MGI:1194490]	18	27	27	47	1264	140.3	5.58	1.01278	0.95845	1.05669	0.756351
ENSMUSP00000081880	golgi autoantigen, golgin subfamily a, 4	Golga4	pep chromosome:GRCm39:9:118335335:118411587:1 gene:ENSMUSG00000038708.11 transcript:ENSMUST00000084820.6 gene_biotype:protein_coding transcript_biotype:protein_coding gene_symbol:Golga4 description:golgi autoantigen, golgin subfamily a, 4 [Source:MGI Symbol;Acc:MGI:1859646]	14	29	29	36	2238	257.4	5.36	0.995415	0.989535	1.00594	0.996513
ENSMUSP00000042351	acetyl-Coenzyme A acyltransferase 1A	Acaa1a	pep chromosome:GRCm39:9:119170360:119179365:1 gene:ENSMUSG00000036138.17 transcript:ENSMUST00000039784.12 gene_biotype:protein_coding transcript_biotype:protein_coding gene_symbol:Acaa1a description:acetyl-Coenzyme A acyltransferase 1A [Source:MGI Symbol;Acc:MGI:2148491]	33	11	11	28	424	43.9	8.44	1.08157	1.32181	0.818248	0.136237
ENSMUSP00000044361	SWI/SNF related, matrix associated, actin dependent regulator of chromatin, subfamily a, member 5	Smarca5	pep chromosome:GRCm39:8:81425136:81466126:-1 gene:ENSMUSG00000031715.15 transcript:ENSMUST00000043359.9 gene_biotype:protein_coding transcript_biotype:protein_coding gene_symbol:Smarca5 description:SWI/SNF related, matrix associated, actin dependent regulator of chromatin, subfamily a, member 5 [Source:MGI Symbol;Acc:MGI:1935129]	24	27	27	38	1051	121.6	8.15	1.05655	1.0701	0.987341	0.889738
ENSMUSP00000023486	transferrin receptor	Tfrc	pep chromosome:GRCm39:16:32427738:32451612:1 gene:ENSMUSG00000022797.17 transcript:ENSMUST00000023486.15 gene_biotype:protein_coding transcript_biotype:protein_coding gene_symbol:Tfrc description:transferrin receptor [Source:MGI Symbol;Acc:MGI:98822]	29	21	21	44	763	85.7	6.57	0.986472	1.02237	0.964885	0.761023
ENSMUSP00000055535	DEAD box helicase 17	Ddx17	pep chromosome:GRCm39:15:79411937:79430942:-1 gene:ENSMUSG00000055065.8 transcript:ENSMUST00000054014.9 gene_biotype:protein_coding transcript_biotype:protein_coding gene_symbol:Ddx17 description:DEAD box helicase 17 [Source:MGI Symbol;Acc:MGI:1914290]	33	14	21	44	652	72.5	8.68	0.97755	1.15037	0.849772	0.223217
ENSMUSP00000027252	eukaryotic translation initiation factor 5B	Eif5b	pep chromosome:GRCm39:1:38037091:38094660:1 gene:ENSMUSG00000026083.13 transcript:ENSMUST00000027252.8 gene_biotype:protein_coding transcript_biotype:protein_coding gene_symbol:Eif5b description:eukaryotic translation initiation factor 5B [Source:MGI Symbol;Acc:MGI:2441772]	19	24	25	37	1216	137.5	5.59	0.993551	0.971428	1.02277	0.918728
ENSMUSP00000099399	ATPase, H+ transporting, lysosomal V0 subunit A1	Atp6v0a1	pep chromosome:GRCm39:11:100900278:100953250:1 gene:ENSMUSG00000019302.17 transcript:ENSMUST00000103110.10 gene_biotype:protein_coding transcript_biotype:protein_coding gene_symbol:Atp6v0a1 description:ATPase, H+ transporting, lysosomal V0 subunit A1 [Source:MGI Symbol;Acc:MGI:103286]	26	20	22	40	839	96.4	6.76	1.15157	1.12484	1.02377	0.9138
ENSMUSP00000109692	plastin 3 (T-isoform)	Pls3	pep chromosome:GRCm39:X:74829269:74870559:-1 gene:ENSMUSG00000016382.16 transcript:ENSMUST00000114058.8 gene_biotype:protein_coding transcript_biotype:protein_coding gene_symbol:Pls3 description:plastin 3 (T-isoform) [Source:MGI Symbol;Acc:MGI:104807]	38	20	25	50	639	71.7	5.62	1.12249	1.16281	0.96533	0.763552
ENSMUSP00000127034	eukaryotic translation initiation factor 4A1	Eif4a1	pep chromosome:GRCm39:11:69557762:69563143:-1 gene:ENSMUSG00000059796.17 transcript:ENSMUST00000163666.3 gene_biotype:protein_coding transcript_biotype:protein_coding gene_symbol:Eif4a1 description:eukaryotic translation initiation factor 4A1 [Source:MGI Symbol;Acc:MGI:95303]	48	9	19	56	406	46.1	5.48	1.06107	1.00607	1.05467	0.76563
ENSMUSP00000096073	CCR4-NOT transcription complex, subunit 1	Cnot1	pep chromosome:GRCm39:8:96446079:96534090:-1 gene:ENSMUSG00000036550.17 transcript:ENSMUST00000098473.11 gene_biotype:protein_coding transcript_biotype:protein_coding gene_symbol:Cnot1 description:CCR4-NOT transcription complex, subunit 1 [Source:MGI Symbol;Acc:MGI:2442402]	13	28	28	40	2376	266.7	7.11	0.928886	0.985872	0.942198	0.634577
ENSMUSP00000120976	hydroxyacyl-CoA dehydrogenase trifunctional multienzyme complex subunit alpha	Hadha	pep chromosome:GRCm39:5:30323302:30360160:-1 gene:ENSMUSG00000025745.13 transcript:ENSMUST00000156859.3 gene_biotype:protein_coding transcript_biotype:protein_coding gene_symbol:Hadha description:hydroxyacyl-CoA dehydrogenase trifunctional multienzyme complex subunit alpha [Source:MGI Symbol;Acc:MGI:2135593]	29	20	20	56	763	82.6	9.14	1.15581	1.06407	1.08621	0.626856
ENSMUSP00000027153	acyl-Coenzyme A dehydrogenase, long-chain	Acadl	pep chromosome:GRCm39:1:66869998:66902436:-1 gene:ENSMUSG00000026003.6 transcript:ENSMUST00000027153.6 gene_biotype:protein_coding transcript_biotype:protein_coding gene_symbol:Acadl description:acyl-Coenzyme A dehydrogenase, long-chain [Source:MGI Symbol;Acc:MGI:87866]	41	16	16	59	430	47.9	8.15	1.24576	1.06176	1.1733	0.327855
ENSMUSP00000147332	transaldolase 1	Taldo1	pep chromosome:GRCm39:7:140972112:140982879:1 gene:ENSMUSG00000025503.6 transcript:ENSMUST00000211654.2 gene_biotype:protein_coding transcript_biotype:protein_coding gene_symbol:Taldo1 description:transaldolase 1 [Source:MGI Symbol;Acc:MGI:1274789]	41	20	20	59	382	42.1	7.02	1.12877	1.28611	0.877658	0.324261
ENSMUSP00000030518	capping protein (actin filament) muscle Z-line, beta	Capzb	pep chromosome:GRCm39:4:138921307:139018751:1 gene:ENSMUSG00000028745.19 transcript:ENSMUST00000030518.16 gene_biotype:protein_coding transcript_biotype:protein_coding gene_symbol:Capzb description:capping protein (actin filament) muscle Z-line, beta [Source:MGI Symbol;Acc:MGI:104652]	49	17	17	63	301	33.7	6.43	1.01675	0.988881	1.02818	0.892047
ENSMUSP00000032078	chaperonin containing Tcp1, subunit 7 (eta)	Cct7	pep chromosome:GRCm39:6:85428496:85445457:1 gene:ENSMUSG00000030007.9 transcript:ENSMUST00000032078.9 gene_biotype:protein_coding transcript_biotype:protein_coding gene_symbol:Cct7 description:chaperonin containing Tcp1, subunit 7 (eta) [Source:MGI Symbol;Acc:MGI:107184]	45	21	21	50	544	59.6	7.84	0.93031	0.941951	0.987641	0.891467
ENSMUSP00000140404	neutrophil cytosolic factor 2	Ncf2	pep chromosome:GRCm39:1:152675945:152712742:1 gene:ENSMUSG00000026480.13 transcript:ENSMUST00000186568.7 gene_biotype:protein_coding transcript_biotype:protein_coding gene_symbol:Ncf2 description:neutrophil cytosolic factor 2 [Source:MGI Symbol;Acc:MGI:97284]	34	21	21	45	525	59.4	6.61	1.01033	1.03204	0.978966	0.84155
ENSMUSP00000041814	lon peptidase 1, mitochondrial	Lonp1	pep chromosome:GRCm39:17:56921297:56933887:-1 gene:ENSMUSG00000041168.11 transcript:ENSMUST00000047226.10 gene_biotype:protein_coding transcript_biotype:protein_coding gene_symbol:Lonp1 description:lon peptidase 1, mitochondrial [Source:MGI Symbol;Acc:MGI:1921392]	23	21	21	39	949	105.8	6.57	1.1836	1.1953	0.990209	0.906249
ENSMUSP00000112870	methylenetetrahydrofolate dehydrogenase (NADP+ dependent) 1-like	Mthfd1l	pep chromosome:GRCm39:10:3923118:4106111:1 gene:ENSMUSG00000040675.18 transcript:ENSMUST00000117291.8 gene_biotype:protein_coding transcript_biotype:protein_coding gene_symbol:Mthfd1l description:methylenetetrahydrofolate dehydrogenase (NADP+ dependent) 1-like [Source:MGI Symbol;Acc:MGI:1924836]	26	24	25	35	977	105.7	7.02	1.06688	1.14186	0.934339	0.59227
ENSMUSP00000033121	nodal modulator 1	Nomo1	pep chromosome:GRCm39:7:45683122:45733636:1 gene:ENSMUSG00000030835.7 transcript:ENSMUST00000033121.7 gene_biotype:protein_coding transcript_biotype:protein_coding gene_symbol:Nomo1 description:nodal modulator 1 [Source:MGI Symbol;Acc:MGI:2385850]	26	25	25	33	1214	133.3	6.09	1.0545	1.01911	1.03473	0.860125
ENSMUSP00000011896	phosphoglycerate mutase 1	Pgam1	pep chromosome:GRCm39:19:41900362:41907099:1 gene:ENSMUSG00000011752.8 transcript:ENSMUST00000011896.8 gene_biotype:protein_coding transcript_biotype:protein_coding gene_symbol:Pgam1 description:phosphoglycerate mutase 1 [Source:MGI Symbol;Acc:MGI:97552]	60	13	13	47	254	28.8	7.18	1.08114	0.989628	1.09247	0.601075
ENSMUSP00000075089	UPF1 regulator of nonsense transcripts homolog (yeast)	Upf1	pep chromosome:GRCm39:8:70784175:70805928:-1 gene:ENSMUSG00000058301.9 transcript:ENSMUST00000075666.8 gene_biotype:protein_coding transcript_biotype:protein_coding gene_symbol:Upf1 description:UPF1 regulator of nonsense transcripts homolog (yeast) [Source:MGI Symbol;Acc:MGI:107995]	25	25	25	35	1124	123.9	6.61	1.00117	1.17543	0.851745	0.229623
ENSMUSP00000103007	isocitrate dehydrogenase 2 (NADP+), mitochondrial	Idh2	pep chromosome:GRCm39:7:79744594:79765140:-1 gene:ENSMUSG00000030541.17 transcript:ENSMUST00000107384.10 gene_biotype:protein_coding transcript_biotype:protein_coding gene_symbol:Idh2 description:isocitrate dehydrogenase 2 (NADP+), mitochondrial [Source:MGI Symbol;Acc:MGI:96414]	44	17	19	46	452	50.9	8.69	1.07845	1.1154	0.966868	0.772298
ENSMUSP00000035400	NCK associated protein 1 like	Nckap1l	pep chromosome:GRCm39:15:103362254:103407237:1 gene:ENSMUSG00000022488.10 transcript:ENSMUST00000047405.9 gene_biotype:protein_coding transcript_biotype:protein_coding gene_symbol:Nckap1l description:NCK associated protein 1 like [Source:MGI Symbol;Acc:MGI:1926063]	21	25	25	39	1134	128.8	6.64	1.00154	1.03696	0.965847	0.766489
ENSMUSP00000028135	niban apoptosis regulator 2	Niban2	pep chromosome:GRCm39:2:32766126:32815266:1 gene:ENSMUSG00000026796.17 transcript:ENSMUST00000028135.15 gene_biotype:protein_coding transcript_biotype:protein_coding gene_symbol:Niban2 description:niban apoptosis regulator 2 [Source:MGI Symbol;Acc:MGI:2442910]	28	20	20	49	749	84.8	5.94	1.00481	1.058	0.949731	0.675941
ENSMUSP00000153328	DEAD box helicase 46	Ddx46	pep chromosome:GRCm39:13:55782864:55829069:1 gene:ENSMUSG00000021500.18 transcript:ENSMUST00000223736.2 gene_biotype:protein_coding transcript_biotype:protein_coding gene_symbol:Ddx46 description:DEAD box helicase 46 [Source:MGI Symbol;Acc:MGI:1920895]	23	26	26	34	1032	117.4	9.26	1.00556	1.12249	0.89583	0.401851
ENSMUSP00000045816	H1.2 linker histone, cluster member	H1f2	pep chromosome:GRCm39:13:23922791:23924350:1 gene:ENSMUSG00000036181.3 transcript:ENSMUST00000040914.3 gene_biotype:protein_coding transcript_biotype:protein_coding gene_symbol:H1f2 description:H1.2 linker histone, cluster member [Source:MGI Symbol;Acc:MGI:1931526]	43	4	14	88	212	21.3	11	1.30705	1.19785	1.09116	0.606419
ENSMUSP00000034745	myosin IE	Myo1e	pep chromosome:GRCm39:9:70114650:70307048:1 gene:ENSMUSG00000032220.11 transcript:ENSMUST00000034745.9 gene_biotype:protein_coding transcript_biotype:protein_coding gene_symbol:Myo1e description:myosin IE [Source:MGI Symbol;Acc:MGI:106621]	22	23	27	49	1107	126.7	9.07	1.12775	0.89683	1.25748	0.155385
ENSMUSP00000027777	poly (ADP-ribose) polymerase family, member 1	Parp1	pep chromosome:GRCm39:1:180396494:180428819:1 gene:ENSMUSG00000026496.12 transcript:ENSMUST00000027777.12 gene_biotype:protein_coding transcript_biotype:protein_coding gene_symbol:Parp1 description:poly (ADP-ribose) polymerase family, member 1 [Source:MGI Symbol;Acc:MGI:1340806]	23	24	24	36	1014	112.7	8.95	0.994778	1.03528	0.96088	0.738337
ENSMUSP00000080354	ribosomal protein L3	Rpl3	pep chromosome:GRCm39:15:79961992:79967607:-1 gene:ENSMUSG00000060036.15 transcript:ENSMUST00000081650.15 gene_biotype:protein_coding transcript_biotype:protein_coding gene_symbol:Rpl3 description:ribosomal protein L3 [Source:MGI Symbol;Acc:MGI:1351605]	50	22	22	47	403	46.1	10.21	1.05914	1.14906	0.921745	0.526622
ENSMUSP00000071054	proteasome (prosome, macropain) 26S subunit, ATPase 3	Psmc3	pep chromosome:GRCm39:2:90884354:90889777:1 gene:ENSMUSG00000002102.16 transcript:ENSMUST00000067663.14 gene_biotype:protein_coding transcript_biotype:protein_coding gene_symbol:Psmc3 description:proteasome (prosome, macropain) 26S subunit, ATPase 3 [Source:MGI Symbol;Acc:MGI:1098754]	37	16	16	36	442	49.5	5.19	1.0153	0.939532	1.08065	0.650277
ENSMUSP00000090854	cytoplasmic FMR1 interacting protein 2	Cyfip2	pep chromosome:GRCm39:11:46084682:46203121:-1 gene:ENSMUSG00000020340.17 transcript:ENSMUST00000093166.11 gene_biotype:protein_coding transcript_biotype:protein_coding gene_symbol:Cyfip2 description:cytoplasmic FMR1 interacting protein 2 [Source:MGI Symbol;Acc:MGI:1924134]	19	11	24	37	1253	145.6	7.05	1.08232	1.08032	1.00186	0.973151
ENSMUSP00000105094	topoisomerase (DNA) I	Top1	pep chromosome:GRCm39:2:160487808:160564684:1 gene:ENSMUSG00000070544.7 transcript:ENSMUST00000109468.3 gene_biotype:protein_coding transcript_biotype:protein_coding gene_symbol:Top1 description:topoisomerase (DNA) I [Source:MGI Symbol;Acc:MGI:98788]	35	27	27	42	767	90.8	9.33	0.99178	1.00404	0.987793	0.892342
ENSMUSP00000020315	cullin associated and neddylation disassociated 1	Cand1	pep chromosome:GRCm39:10:119035160:119075960:-1 gene:ENSMUSG00000020114.13 transcript:ENSMUST00000020315.13 gene_biotype:protein_coding transcript_biotype:protein_coding gene_symbol:Cand1 description:cullin associated and neddylation disassociated 1 [Source:MGI Symbol;Acc:MGI:1261820]	18	24	24	36	1230	136.2	5.78	0.942774	1.00406	0.93896	0.617031
ENSMUSP00000006235	cathepsin B	Ctsb	pep chromosome:GRCm39:14:63359911:63383372:1 gene:ENSMUSG00000021939.9 transcript:ENSMUST00000006235.9 gene_biotype:protein_coding transcript_biotype:protein_coding gene_symbol:Ctsb description:cathepsin B [Source:MGI Symbol;Acc:MGI:88561]	43	13	13	88	339	37.3	5.91	0.706883	0.59153	1.19501	0.27331
ENSMUSP00000044395	H1.3 linker histone, cluster member	H1f3	pep chromosome:GRCm39:13:23737436:23744860:1 gene:ENSMUSG00000052565.8 transcript:ENSMUST00000045301.9 gene_biotype:protein_coding transcript_biotype:protein_coding gene_symbol:H1f3 description:H1.3 linker histone, cluster member [Source:MGI Symbol;Acc:MGI:107502]	52	3	17	93	221	22.1	11.03	1.19728	1.12259	1.06653	0.711806
ENSMUSP00000016463	solute carrier family 25 (mitochondrial carrier, adenine nucleotide translocator), member 5	Slc25a5	pep chromosome:GRCm39:X:36059304:36062460:1 gene:ENSMUSG00000016319.4 transcript:ENSMUST00000016463.4 gene_biotype:protein_coding transcript_biotype:protein_coding gene_symbol:Slc25a5 description:solute carrier family 25 (mitochondrial carrier, adenine nucleotide translocator), member 5 [Source:MGI Symbol;Acc:MGI:1353496]	45	9	17	64	298	32.9	9.73	1.18598	1.14035	1.04002	0.834635
ENSMUSP00000005705	tripartite motif-containing 28	Trim28	pep chromosome:GRCm39:7:12758079:12764962:1 gene:ENSMUSG00000005566.15 transcript:ENSMUST00000005705.8 gene_biotype:protein_coding transcript_biotype:protein_coding gene_symbol:Trim28 description:tripartite motif-containing 28 [Source:MGI Symbol;Acc:MGI:109274]	28	20	20	37	834	88.8	5.77	1.14333	1.46716	0.779286	0.0656349
ENSMUSP00000070993	tyrosine 3-monooxygenase/tryptophan 5-monooxygenase activation protein, epsilon polypeptide	Ywhae	pep chromosome:GRCm39:11:75623695:75656671:1 gene:ENSMUSG00000020849.14 transcript:ENSMUST00000067664.10 gene_biotype:protein_coding transcript_biotype:protein_coding gene_symbol:Ywhae description:tyrosine 3-monooxygenase/tryptophan 5-monooxygenase activation protein, epsilon polypeptide [Source:MGI Symbol;Acc:MGI:894689]	57	12	15	67	255	29.2	4.74	0.880947	0.836622	1.05298	0.773473
ENSMUSP00000027432	proteasome (prosome, macropain) 26S subunit, non-ATPase, 1	Psmd1	pep chromosome:GRCm39:1:85992341:86066873:1 gene:ENSMUSG00000026229.18 transcript:ENSMUST00000027432.9 gene_biotype:protein_coding transcript_biotype:protein_coding gene_symbol:Psmd1 description:proteasome (prosome, macropain) 26S subunit, non-ATPase, 1 [Source:MGI Symbol;Acc:MGI:1917497]	24	24	24	30	953	105.7	5.39	0.975964	1.01485	0.961679	0.742854
ENSMUSP00000036288	chaperonin containing Tcp1, subunit 2 (beta)	Cct2	pep chromosome:GRCm39:10:116886906:116899719:-1 gene:ENSMUSG00000034024.9 transcript:ENSMUST00000047672.9 gene_biotype:protein_coding transcript_biotype:protein_coding gene_symbol:Cct2 description:chaperonin containing Tcp1, subunit 2 (beta) [Source:MGI Symbol;Acc:MGI:107186]	38	18	18	42	535	57.4	6.4	0.961237	0.851923	1.12831	0.466057
ENSMUSP00000047571	heterogeneous nuclear ribonucleoprotein U	Hnrnpu	pep chromosome:GRCm39:1:178151908:178165362:-1 gene:ENSMUSG00000039630.11 transcript:ENSMUST00000037748.9 gene_biotype:protein_coding transcript_biotype:protein_coding gene_symbol:Hnrnpu description:heterogeneous nuclear ribonucleoprotein U [Source:MGI Symbol;Acc:MGI:1858195]	27	22	22	52	800	87.9	6.24	1.19863	1.45292	0.824979	0.152426
ENSMUSP00000094515	heterogeneous nuclear ribonucleoprotein U-like 2	Hnrnpul2	pep chromosome:GRCm39:19:8797374:8811507:1 gene:ENSMUSG00000071659.5 transcript:ENSMUST00000096753.5 gene_biotype:protein_coding transcript_biotype:protein_coding gene_symbol:Hnrnpul2 description:heterogeneous nuclear ribonucleoprotein U-like 2 [Source:MGI Symbol;Acc:MGI:1915943]	29	24	24	56	745	84.9	4.89	1.03061	1.09344	0.942539	0.63643
ENSMUSP00000042691	DExD box helicase 21	Ddx21	pep chromosome:GRCm39:10:62416030:62438060:-1 gene:ENSMUSG00000020075.9 transcript:ENSMUST00000045866.9 gene_biotype:protein_coding transcript_biotype:protein_coding gene_symbol:Ddx21 description:DExD box helicase 21 [Source:MGI Symbol;Acc:MGI:1860494]	27	21	21	35	851	93.5	9.11	1.15688	1.06675	1.08449	0.634061
ENSMUSP00000127941	inositol polyphosphate-5-phosphatase D	Inpp5d	pep chromosome:GRCm39:1:87548034:87648229:1 gene:ENSMUSG00000026288.15 transcript:ENSMUST00000169754.8 gene_biotype:protein_coding transcript_biotype:protein_coding gene_symbol:Inpp5d description:inositol polyphosphate-5-phosphatase D [Source:MGI Symbol;Acc:MGI:107357]	22	23	24	32	1191	133.5	7.8	1.00356	1.0161	0.987659	0.891571
ENSMUSP00000158745	active BCR-related gene	Abr	pep chromosome:GRCm39:11:76307560:76514384:-1 gene:ENSMUSG00000017631.20 transcript:ENSMUST00000238684.2 gene_biotype:protein_coding transcript_biotype:protein_coding gene_symbol:Abr description:active BCR-related gene [Source:MGI Symbol;Acc:MGI:107771]	24	26	26	45	1185	132.9	5.96	1.09245	1.03431	1.05621	0.758555
ENSMUSP00000033176	ubiquinol cytochrome c reductase core protein 2	Uqcrc2	pep chromosome:GRCm39:7:120234399:120258747:1 gene:ENSMUSG00000030884.13 transcript:ENSMUST00000033176.7 gene_biotype:protein_coding transcript_biotype:protein_coding gene_symbol:Uqcrc2 description:ubiquinol cytochrome c reductase core protein 2 [Source:MGI Symbol;Acc:MGI:1914253]	40	15	15	45	453	48.2	9.25	1.26915	1.15546	1.0984	0.577267
ENSMUSP00000027921	isoleucine-tRNA synthetase 2, mitochondrial	Iars2	pep chromosome:GRCm39:1:185016923:185061593:-1 gene:ENSMUSG00000026618.12 transcript:ENSMUST00000027921.11 gene_biotype:protein_coding transcript_biotype:protein_coding gene_symbol:Iars2 description:isoleucine-tRNA synthetase 2, mitochondrial [Source:MGI Symbol;Acc:MGI:1919586]	27	22	22	34	1012	112.7	6.81	1.23439	1.16182	1.06246	0.730054
ENSMUSP00000101972	coronin, actin binding protein 1A	Coro1a	pep chromosome:GRCm39:7:126298945:126303392:-1 gene:ENSMUSG00000030707.16 transcript:ENSMUST00000106364.8 gene_biotype:protein_coding transcript_biotype:protein_coding gene_symbol:Coro1a description:coronin, actin binding protein 1A [Source:MGI Symbol;Acc:MGI:1345961]	40	18	19	69	461	51	6.48	1.14344	1.0152	1.12632	0.472993
ENSMUSP00000064755	3-phosphoglycerate dehydrogenase	Phgdh	pep chromosome:GRCm39:3:98220486:98247306:-1 gene:ENSMUSG00000053398.12 transcript:ENSMUST00000065793.12 gene_biotype:protein_coding transcript_biotype:protein_coding gene_symbol:Phgdh description:3-phosphoglycerate dehydrogenase [Source:MGI Symbol;Acc:MGI:1355330]	35	16	16	26	533	56.5	6.54	0.919414	0.977975	0.94012	0.623302
ENSMUSP00000029549	tropomyosin 3, gamma	Tpm3	pep chromosome:GRCm39:3:89986847:90008208:1 gene:ENSMUSG00000027940.19 transcript:ENSMUST00000029549.16 gene_biotype:protein_coding transcript_biotype:protein_coding gene_symbol:Tpm3 description:tropomyosin 3, gamma [Source:MGI Symbol;Acc:MGI:1890149]	53	13	19	63	248	29	4.78	0.956431	0.989145	0.966927	0.772634
ENSMUSP00000130696	myosin XVIIIA	Myo18a	pep chromosome:GRCm39:11:77668119:77755968:1 gene:ENSMUSG00000000631.21 transcript:ENSMUST00000168348.8 gene_biotype:protein_coding transcript_biotype:protein_coding gene_symbol:Myo18a description:myosin XVIIIA [Source:MGI Symbol;Acc:MGI:2667185]	12	25	25	27	2083	235.7	6.07	0.99309	1.0429	0.952235	0.689843
ENSMUSP00000096280	Rho guanine nucleotide exchange factor (GEF) 1	Arhgef1	pep chromosome:GRCm39:7:24602476:24626014:1 gene:ENSMUSG00000040940.19 transcript:ENSMUST00000098683.11 gene_biotype:protein_coding transcript_biotype:protein_coding gene_symbol:Arhgef1 description:Rho guanine nucleotide exchange factor (GEF) 1 [Source:MGI Symbol;Acc:MGI:1353510]	26	22	22	34	979	109.2	6.28	0.863001	0.884366	0.975842	0.823606
ENSMUSP00000159368	triosephosphate isomerase 1	Tpi1	pep chromosome:GRCm39:6:124787555:124791259:-1 gene:ENSMUSG00000023456.17 transcript:ENSMUST00000239432.2 gene_biotype:protein_coding transcript_biotype:protein_coding gene_symbol:Tpi1 description:triosephosphate isomerase 1 [Source:MGI Symbol;Acc:MGI:98797]	52	14	14	42	299	32.2	5.74	1.0597	1.05342	1.00597	0.996644
ENSMUSP00000001802	alpha-N-acetylglucosaminidase (Sanfilippo disease IIIB)	Naglu	pep chromosome:GRCm39:11:100960838:100968498:1 gene:ENSMUSG00000001751.10 transcript:ENSMUST00000001802.10 gene_biotype:protein_coding transcript_biotype:protein_coding gene_symbol:Naglu description:alpha-N-acetylglucosaminidase (Sanfilippo disease IIIB) [Source:MGI Symbol;Acc:MGI:1351641]	26	17	17	43	739	82.5	6.61	1.26669	1.097	1.15468	0.380851
ENSMUSP00000022976	WASH complex subunit 5	Washc5	pep chromosome:GRCm39:15:59203846:59246016:-1 gene:ENSMUSG00000022350.8 transcript:ENSMUST00000022976.6 gene_biotype:protein_coding transcript_biotype:protein_coding gene_symbol:Washc5 description:WASH complex subunit 5 [Source:MGI Symbol;Acc:MGI:2146110]	22	26	26	35	1159	134	7.12	0.9185	0.901427	1.01894	0.937774
ENSMUSP00000031355	USO1 vesicle docking factor	Uso1	pep chromosome:GRCm39:5:92285797:92350654:1 gene:ENSMUSG00000029407.11 transcript:ENSMUST00000031355.10 gene_biotype:protein_coding transcript_biotype:protein_coding gene_symbol:Uso1 description:USO1 vesicle docking factor [Source:MGI Symbol;Acc:MGI:1929095]	23	21	21	31	959	106.9	4.93	1.09298	1.12704	0.969779	0.788896
ENSMUSP00000102381	capping protein (actin filament) muscle Z-line, alpha 1	Capza1	pep chromosome:GRCm39:3:104730095:104771821:-1 gene:ENSMUSG00000070372.12 transcript:ENSMUST00000094028.10 gene_biotype:protein_coding transcript_biotype:protein_coding gene_symbol:Capza1 description:capping protein (actin filament) muscle Z-line, alpha 1 [Source:MGI Symbol;Acc:MGI:106227]	62	9	11	52	286	32.9	5.55	1.09627	0.941939	1.16384	0.354041
ENSMUSP00000002091	B cell receptor associated protein 31	Bcap31	pep chromosome:GRCm39:X:72729784:72759781:-1 gene:ENSMUSG00000002015.6 transcript:ENSMUST00000002091.6 gene_biotype:protein_coding transcript_biotype:protein_coding gene_symbol:Bcap31 description:B cell receptor associated protein 31 [Source:MGI Symbol;Acc:MGI:1350933]	36	14	14	51	245	27.9	8.7	1.42133	1.13103	1.25667	0.156597
ENSMUSP00000068964	Rho GTPase activating protein 25	Arhgap25	pep chromosome:GRCm39:6:87436387:87510241:-1 gene:ENSMUSG00000030047.15 transcript:ENSMUST00000071024.7 gene_biotype:protein_coding transcript_biotype:protein_coding gene_symbol:Arhgap25 description:Rho GTPase activating protein 25 [Source:MGI Symbol;Acc:MGI:2443687]	45	24	25	49	559	62.8	5.48	0.972315	0.808957	1.20194	0.257472
ENSMUSP00000034131	VPS35 retromer complex component	Vps35	pep chromosome:GRCm39:8:85987021:86026431:-1 gene:ENSMUSG00000031696.10 transcript:ENSMUST00000034131.10 gene_biotype:protein_coding transcript_biotype:protein_coding gene_symbol:Vps35 description:VPS35 retromer complex component [Source:MGI Symbol;Acc:MGI:1890467]	24	21	21	42	796	91.7	5.44	1.04844	1.0747	0.975568	0.822035
ENSMUSP00000072199	dynamin 2	Dnm2	pep chromosome:GRCm39:9:21336241:21418436:1 gene:ENSMUSG00000033335.18 transcript:ENSMUST00000072362.14 gene_biotype:protein_coding transcript_biotype:protein_coding gene_symbol:Dnm2 description:dynamin 2 [Source:MGI Symbol;Acc:MGI:109547]	28	24	24	40	870	98	7.44	1.01989	1.02887	0.991265	0.912327
ENSMUSP00000051033	tubulin, alpha 1C	Tuba1c	pep chromosome:GRCm39:15:98927772:98935991:1 gene:ENSMUSG00000043091.10 transcript:ENSMUST00000058914.10 gene_biotype:protein_coding transcript_biotype:protein_coding gene_symbol:Tuba1c description:tubulin, alpha 1C [Source:MGI Symbol;Acc:MGI:1095409]	49	1	17	46	449	49.9	5.1	1.07244	0.976437	1.09832	0.577576
ENSMUSP00000099381	cathepsin A	Ctsa	pep chromosome:GRCm39:2:164674821:164682952:1 gene:ENSMUSG00000017760.17 transcript:ENSMUST00000103092.9 gene_biotype:protein_coding transcript_biotype:protein_coding gene_symbol:Ctsa description:cathepsin A [Source:MGI Symbol;Acc:MGI:97748]	26	13	13	45	492	55.7	5.87	1.01243	1.04734	0.966671	0.771177
ENSMUSP00000109230	RAB7, member RAS oncogene family	Rab7	pep chromosome:GRCm39:6:87976088:88022252:-1 gene:ENSMUSG00000079477.10 transcript:ENSMUST00000113600.10 gene_biotype:protein_coding transcript_biotype:protein_coding gene_symbol:Rab7 description:RAB7, member RAS oncogene family [Source:MGI Symbol;Acc:MGI:105068]	72	14	14	46	207	23.5	6.7	1.22749	1.10282	1.11305	0.520907
ENSMUSP00000099634	acyl-Coenzyme A dehydrogenase, very long chain	Acadvl	pep chromosome:GRCm39:11:69901009:69906234:-1 gene:ENSMUSG00000018574.15 transcript:ENSMUST00000102574.10 gene_biotype:protein_coding transcript_biotype:protein_coding gene_symbol:Acadvl description:acyl-Coenzyme A dehydrogenase, very long chain [Source:MGI Symbol;Acc:MGI:895149]	33	20	20	38	656	70.8	8.75	1.13645	1.07533	1.05684	0.755667
ENSMUSP00000034966	ribosomal protein L4	Rpl4	pep chromosome:GRCm39:9:64080657:64085948:1 gene:ENSMUSG00000032399.9 transcript:ENSMUST00000034966.9 gene_biotype:protein_coding transcript_biotype:protein_coding gene_symbol:Rpl4 description:ribosomal protein L4 [Source:MGI Symbol;Acc:MGI:1915141]	40	17	17	33	419	47.1	11	1.01044	0.956493	1.0564	0.757669
ENSMUSP00000028610	catalase	Cat	pep chromosome:GRCm39:2:103284194:103315505:-1 gene:ENSMUSG00000027187.11 transcript:ENSMUST00000028610.10 gene_biotype:protein_coding transcript_biotype:protein_coding gene_symbol:Cat description:catalase [Source:MGI Symbol;Acc:MGI:88271]	42	19	19	38	527	59.8	7.88	0.948352	1.06432	0.891036	0.380532
ENSMUSP00000100868	SWI/SNF related, matrix associated, actin dependent regulator of chromatin, subfamily c, member 2	Smarcc2	pep chromosome:GRCm39:10:128295190:128325225:1 gene:ENSMUSG00000025369.16 transcript:ENSMUST00000105235.10 gene_biotype:protein_coding transcript_biotype:protein_coding gene_symbol:Smarcc2 description:SWI/SNF related, matrix associated, actin dependent regulator of chromatin, subfamily c, member 2 [Source:MGI Symbol;Acc:MGI:1915344]	17	19	23	36	1213	132.5	5.59	1.01966	1.1238	0.907329	0.455324
ENSMUSP00000036998	leucyl/cystinyl aminopeptidase	Lnpep	pep chromosome:GRCm39:17:17741672:17845309:-1 gene:ENSMUSG00000023845.8 transcript:ENSMUST00000041047.4 gene_biotype:protein_coding transcript_biotype:protein_coding gene_symbol:Lnpep description:leucyl/cystinyl aminopeptidase [Source:MGI Symbol;Acc:MGI:2387123]	17	16	16	33	1025	117.2	5.96	1.04679	1.11133	0.941923	0.633077
ENSMUSP00000025891	calpain 1	Capn1	pep chromosome:GRCm39:19:6038573:6065236:-1 gene:ENSMUSG00000024942.20 transcript:ENSMUST00000025891.11 gene_biotype:protein_coding transcript_biotype:protein_coding gene_symbol:Capn1 description:calpain 1 [Source:MGI Symbol;Acc:MGI:88263]	29	21	21	38	713	82.1	5.87	0.950432	0.92531	1.02715	0.897121
ENSMUSP00000118751	ankyrin repeat and FYVE domain containing 1	Ankfy1	pep chromosome:GRCm39:11:72580832:72662972:1 gene:ENSMUSG00000020790.15 transcript:ENSMUST00000155998.2 gene_biotype:protein_coding transcript_biotype:protein_coding gene_symbol:Ankfy1 description:ankyrin repeat and FYVE domain containing 1 [Source:MGI Symbol;Acc:MGI:1337008]	21	20	20	29	1169	128.6	5.91	0.914297	0.78261	1.16827	0.341597
ENSMUSP00000145028	heterogeneous nuclear ribonucleoprotein A2/B1	Hnrnpa2b1	pep chromosome:GRCm39:6:51438101:51446827:-1 gene:ENSMUSG00000004980.17 transcript:ENSMUST00000203954.3 gene_biotype:protein_coding transcript_biotype:nonsense_mediated_decay gene_symbol:Hnrnpa2b1 description:heterogeneous nuclear ribonucleoprotein A2/B1 [Source:MGI Symbol;Acc:MGI:104819]	52	15	18	48	353	37.4	8.95	1.22839	1.47325	0.833793	0.175555
ENSMUSP00000147383	nucleobindin 1	Nucb1	pep chromosome:GRCm39:7:45139882:45159830:-1 gene:ENSMUSG00000030824.18 transcript:ENSMUST00000211765.2 gene_biotype:protein_coding transcript_biotype:protein_coding gene_symbol:Nucb1 description:nucleobindin 1 [Source:MGI Symbol;Acc:MGI:97388]	42	20	20	35	459	53.4	5.07	1.06179	1.08714	0.976681	0.828422
ENSMUSP00000007814	KH-type splicing regulatory protein	Khsrp	pep chromosome:GRCm39:17:57328051:57338488:-1 gene:ENSMUSG00000007670.11 transcript:ENSMUST00000007814.10 gene_biotype:protein_coding transcript_biotype:protein_coding gene_symbol:Khsrp description:KH-type splicing regulatory protein [Source:MGI Symbol;Acc:MGI:1336214]	34	19	22	35	748	76.7	7.33	0.878018	1.09905	0.798888	0.0964719
ENSMUSP00000028755	EH-domain containing 4	Ehd4	pep chromosome:GRCm39:2:119919656:119985087:-1 gene:ENSMUSG00000027293.14 transcript:ENSMUST00000028755.8 gene_biotype:protein_coding transcript_biotype:protein_coding gene_symbol:Ehd4 description:EH-domain containing 4 [Source:MGI Symbol;Acc:MGI:1919619]	35	19	19	43	541	61.4	6.76	1.05699	0.930636	1.13577	0.440734
ENSMUSP00000009058	ATP-binding cassette, sub-family B (MDR/TAP), member 1B	Abcb1b	pep chromosome:GRCm39:5:8848186:8916315:1 gene:ENSMUSG00000028970.10 transcript:ENSMUST00000009058.10 gene_biotype:protein_coding transcript_biotype:protein_coding gene_symbol:Abcb1b description:ATP-binding cassette, sub-family B (MDR/TAP), member 1B [Source:MGI Symbol;Acc:MGI:97568]	19	10	25	29	1276	140.9	8.34	0.973651	0.985654	0.987822	0.892506
ENSMUSP00000031447	annexin A3	Anxa3	pep chromosome:GRCm39:5:96941244:96993825:1 gene:ENSMUSG00000029484.13 transcript:ENSMUST00000031447.12 gene_biotype:protein_coding transcript_biotype:protein_coding gene_symbol:Anxa3 description:annexin A3 [Source:MGI Symbol;Acc:MGI:1201378]	44	15	16	39	323	36.4	5.76	1.09173	0.959796	1.13746	0.435146
ENSMUSP00000041104	apoptosis-inducing factor, mitochondrion-associated 1	Aifm1	pep chromosome:GRCm39:X:47563821:47602440:-1 gene:ENSMUSG00000036932.15 transcript:ENSMUST00000037349.8 gene_biotype:protein_coding transcript_biotype:protein_coding gene_symbol:Aifm1 description:apoptosis-inducing factor, mitochondrion-associated 1 [Source:MGI Symbol;Acc:MGI:1349419]	31	17	17	37	612	66.7	9.17	1.12113	1.22768	0.913214	0.483891
ENSMUSP00000043123	serrate RNA effector molecule homolog (Arabidopsis)	Srrt	pep chromosome:GRCm39:5:137293966:137305936:-1 gene:ENSMUSG00000037364.13 transcript:ENSMUST00000040873.12 gene_biotype:protein_coding transcript_biotype:protein_coding gene_symbol:Srrt description:serrate RNA effector molecule homolog (Arabidopsis) [Source:MGI Symbol;Acc:MGI:1933527]	22	20	20	38	875	100.4	5.97	1.01765	1.11617	0.911735	0.476639
ENSMUSP00000027127	splicing factor 3b, subunit 1	Sf3b1	pep chromosome:GRCm39:1:55024328:55066640:-1 gene:ENSMUSG00000025982.14 transcript:ENSMUST00000027127.14 gene_biotype:protein_coding transcript_biotype:protein_coding gene_symbol:Sf3b1 description:splicing factor 3b, subunit 1 [Source:MGI Symbol;Acc:MGI:1932339]	17	20	20	38	1304	145.7	7.09	1.05255	1.05295	0.99962	0.96034
ENSMUSP00000098076	eukaryotic translation initiation factor 3, subunit B	Eif3b	pep chromosome:GRCm39:5:140405083:140429115:1 gene:ENSMUSG00000056076.14 transcript:ENSMUST00000100507.8 gene_biotype:protein_coding transcript_biotype:protein_coding gene_symbol:Eif3b description:eukaryotic translation initiation factor 3, subunit B [Source:MGI Symbol;Acc:MGI:106478]	28	19	19	35	803	91.3	5.02	0.91018	0.849489	1.07144	0.690047
ENSMUSP00000148316	myosin IXb	Myo9b	pep chromosome:GRCm39:8:71725358:71812565:1 gene:ENSMUSG00000004677.18 transcript:ENSMUST00000212935.2 gene_biotype:protein_coding transcript_biotype:protein_coding gene_symbol:Myo9b description:myosin IXb [Source:MGI Symbol;Acc:MGI:106624]	13	25	26	33	1963	222.5	8.4	1.04922	0.934807	1.12239	0.486875
ENSMUSP00000039243	sorting nexin 2	Snx2	pep chromosome:GRCm39:18:53309388:53353937:1 gene:ENSMUSG00000034484.9 transcript:ENSMUST00000037850.7 gene_biotype:protein_coding transcript_biotype:protein_coding gene_symbol:Snx2 description:sorting nexin 2 [Source:MGI Symbol;Acc:MGI:1915054]	38	18	20	30	519	58.4	5.12	0.97478	1.00954	0.965565	0.764886
ENSMUSP00000025918	stress-induced phosphoprotein 1	Stip1	pep chromosome:GRCm39:19:6998070:7017335:-1 gene:ENSMUSG00000024966.10 transcript:ENSMUST00000025918.9 gene_biotype:protein_coding transcript_biotype:protein_coding gene_symbol:Stip1 description:stress-induced phosphoprotein 1 [Source:MGI Symbol;Acc:MGI:109130]	37	24	24	43	543	62.5	6.8	0.982706	0.872002	1.12695	0.470784
ENSMUSP00000144126	nucleoporin 205	Nup205	pep chromosome:GRCm39:6:35154356:35224531:1 gene:ENSMUSG00000038759.16 transcript:ENSMUST00000201374.4 gene_biotype:protein_coding transcript_biotype:protein_coding gene_symbol:Nup205 description:nucleoporin 205 [Source:MGI Symbol;Acc:MGI:2141625]	13	24	24	33	2061	233	6.62	0.957806	0.974866	0.9825	0.861874
ENSMUSP00000015667	cathepsin S	Ctss	pep chromosome:GRCm39:3:95434097:95463711:1 gene:ENSMUSG00000038642.11 transcript:ENSMUST00000015667.9 gene_biotype:protein_coding transcript_biotype:protein_coding gene_symbol:Ctss description:cathepsin S [Source:MGI Symbol;Acc:MGI:107341]	50	13	13	65	341	38.6	7.15	1.38791	1.32685	1.04602	0.806071
ENSMUSP00000057308	H1.4 linker histone, cluster member	H1f4	pep chromosome:GRCm39:13:23804612:23806541:-1 gene:ENSMUSG00000051627.4 transcript:ENSMUST00000062045.4 gene_biotype:protein_coding transcript_biotype:protein_coding gene_symbol:H1f4 description:H1.4 linker histone, cluster member [Source:MGI Symbol;Acc:MGI:1931527]	52	6	16	80	219	22	11.11	1.12169	1.07464	1.04378	0.816687
ENSMUSP00000071231	liver glycogen phosphorylase	Pygl	pep chromosome:GRCm39:12:70237585:70274457:-1 gene:ENSMUSG00000021069.18 transcript:ENSMUST00000071250.13 gene_biotype:protein_coding transcript_biotype:protein_coding gene_symbol:Pygl description:liver glycogen phosphorylase [Source:MGI Symbol;Acc:MGI:97829]	26	21	26	41	850	97.4	7.09	0.968665	0.948795	1.02094	0.92781
ENSMUSP00000107595	heterogeneous nuclear ribonucleoprotein A3	Hnrnpa3	pep chromosome:GRCm39:2:75489605:75496183:1 gene:ENSMUSG00000059005.14 transcript:ENSMUST00000111964.8 gene_biotype:protein_coding transcript_biotype:protein_coding gene_symbol:Hnrnpa3 description:heterogeneous nuclear ribonucleoprotein A3 [Source:MGI Symbol;Acc:MGI:1917171]	35	11	13	39	379	39.6	9.01	0.976226	1.02305	0.95423	0.70097
ENSMUSP00000100911	oxysterol binding protein-like 8	Osbpl8	pep chromosome:GRCm39:10:111000613:111133110:1 gene:ENSMUSG00000020189.16 transcript:ENSMUST00000105275.9 gene_biotype:protein_coding transcript_biotype:protein_coding gene_symbol:Osbpl8 description:oxysterol binding protein-like 8 [Source:MGI Symbol;Acc:MGI:2443807]	24	19	19	32	889	101.2	6.96	1.17436	1.07868	1.0887	0.616513
ENSMUSP00000022169	hexosaminidase B	Hexb	pep chromosome:GRCm39:13:97312839:97334865:-1 gene:ENSMUSG00000021665.10 transcript:ENSMUST00000022169.10 gene_biotype:protein_coding transcript_biotype:protein_coding gene_symbol:Hexb description:hexosaminidase B [Source:MGI Symbol;Acc:MGI:96074]	30	18	18	58	536	61.1	8.12	1.24091	1.00144	1.23912	0.184558
ENSMUSP00000006181	N-ethylmaleimide sensitive fusion protein attachment protein alpha	Napa	pep chromosome:GRCm39:7:15832383:15851900:1 gene:ENSMUSG00000006024.14 transcript:ENSMUST00000006181.7 gene_biotype:protein_coding transcript_biotype:protein_coding gene_symbol:Napa description:N-ethylmaleimide sensitive fusion protein attachment protein alpha [Source:MGI Symbol;Acc:MGI:104563]	55	14	14	36	295	33.2	5.45	0.950636	0.86101	1.10409	0.554926
ENSMUSP00000028004	aldehyde dehydrogenase 9, subfamily A1	Aldh9a1	pep chromosome:GRCm39:1:167177560:167196101:1 gene:ENSMUSG00000026687.15 transcript:ENSMUST00000028004.11 gene_biotype:protein_coding transcript_biotype:protein_coding gene_symbol:Aldh9a1 description:aldehyde dehydrogenase 9, subfamily A1 [Source:MGI Symbol;Acc:MGI:1861622]	38	17	17	33	518	55.9	7.46	0.935439	0.902224	1.03681	0.850035
ENSMUSP00000025649	damage specific DNA binding protein 1	Ddb1	pep chromosome:GRCm39:19:10582691:10607183:1 gene:ENSMUSG00000024740.11 transcript:ENSMUST00000025649.10 gene_biotype:protein_coding transcript_biotype:protein_coding gene_symbol:Ddb1 description:damage specific DNA binding protein 1 [Source:MGI Symbol;Acc:MGI:1202384]	21	24	24	41	1140	126.8	5.26	0.905294	0.97687	0.926729	0.552259
ENSMUSP00000027384	5-aminoimidazole-4-carboxamide ribonucleotide formyltransferase/IMP cyclohydrolase	Atic	pep chromosome:GRCm39:1:71596309:71618790:1 gene:ENSMUSG00000026192.14 transcript:ENSMUST00000027384.6 gene_biotype:protein_coding transcript_biotype:protein_coding gene_symbol:Atic description:5-aminoimidazole-4-carboxamide ribonucleotide formyltransferase/IMP cyclohydrolase [Source:MGI Symbol;Acc:MGI:1351352]	39	18	18	26	592	64.2	6.76	0.935713	0.947177	0.987897	0.892938
ENSMUSP00000106861	transgelin 2	Tagln2	pep chromosome:GRCm39:1:172327614:172334947:1 gene:ENSMUSG00000026547.16 transcript:ENSMUST00000111230.8 gene_biotype:protein_coding transcript_biotype:protein_coding gene_symbol:Tagln2 description:transgelin 2 [Source:MGI Symbol;Acc:MGI:1312985]	71	14	14	28	199	22.4	8.24	0.82795	0.950682	0.870902	0.297721
ENSMUSP00000038763	propionyl-Coenzyme A carboxylase, alpha polypeptide	Pcca	pep chromosome:GRCm39:14:122771751:123127356:1 gene:ENSMUSG00000041650.16 transcript:ENSMUST00000038374.13 gene_biotype:protein_coding transcript_biotype:protein_coding gene_symbol:Pcca description:propionyl-Coenzyme A carboxylase, alpha polypeptide [Source:MGI Symbol;Acc:MGI:97499]	36	20	20	29	724	79.9	7.25	1.08297	0.997362	1.08584	0.628416
ENSMUSP00000015484	cytochrome b-245, beta polypeptide	Cybb	pep chromosome:GRCm39:X:9301491:9335563:-1 gene:ENSMUSG00000015340.11 transcript:ENSMUST00000015484.10 gene_biotype:protein_coding transcript_biotype:protein_coding gene_symbol:Cybb description:cytochrome b-245, beta polypeptide [Source:MGI Symbol;Acc:MGI:88574]	34	18	18	53	570	65.3	7.72	1.06535	0.975186	1.09245	0.601154
ENSMUSP00000016081	macroH2A.1 histone	Macroh2a1	pep chromosome:GRCm39:13:56221432:56283444:-1 gene:ENSMUSG00000015937.16 transcript:ENSMUST00000016081.13 gene_biotype:protein_coding transcript_biotype:protein_coding gene_symbol:Macroh2a1 description:macroH2A.1 histone [Source:MGI Symbol;Acc:MGI:1349392]	47	15	16	43	372	39.7	9.8	1.0346	1.12007	0.923691	0.536572
ENSMUSP00000158895	integrin alpha 6	Itga6	pep chromosome:GRCm39:2:71617483:71686359:1 gene:ENSMUSG00000027111.17 transcript:ENSMUST00000238991.2 gene_biotype:protein_coding transcript_biotype:protein_coding gene_symbol:Itga6 description:integrin alpha 6 [Source:MGI Symbol;Acc:MGI:96605]	22	22	22	32	1130	126.6	6.93	0.908725	0.912409	0.995963	0.939347
ENSMUSP00000037869	RAS p21 protein activator 4	Rasa4	pep chromosome:GRCm39:5:136112770:136140714:1 gene:ENSMUSG00000004952.14 transcript:ENSMUST00000042135.14 gene_biotype:protein_coding transcript_biotype:protein_coding gene_symbol:Rasa4 description:RAS p21 protein activator 4 [Source:MGI Symbol;Acc:MGI:1858600]	29	23	23	38	802	90	8	1.1004	1.09642	1.00363	0.983286
ENSMUSP00000121340	pre-mRNA splicing factor 6	Prpf6	pep chromosome:GRCm39:2:181243109:181297444:1 gene:ENSMUSG00000002455.15 transcript:ENSMUST00000136481.8 gene_biotype:protein_coding transcript_biotype:protein_coding gene_symbol:Prpf6 description:pre-mRNA splicing factor 6 [Source:MGI Symbol;Acc:MGI:1922946]	26	25	25	39	941	106.7	8.09	0.960374	1.05243	0.912532	0.480538
ENSMUSP00000022706	succinate-Coenzyme A ligase, ADP-forming, beta subunit	Sucla2	pep chromosome:GRCm39:14:73790206:73833223:1 gene:ENSMUSG00000022110.14 transcript:ENSMUST00000022706.7 gene_biotype:protein_coding transcript_biotype:protein_coding gene_symbol:Sucla2 description:succinate-Coenzyme A ligase, ADP-forming, beta subunit [Source:MGI Symbol;Acc:MGI:1306775]	36	18	18	40	463	50.1	7.01	1.25791	1.14598	1.09767	0.580157
ENSMUSP00000049977	STE20-like kinase	Slk	pep chromosome:GRCm39:19:47568458:47630894:1 gene:ENSMUSG00000025060.16 transcript:ENSMUST00000051691.8 gene_biotype:protein_coding transcript_biotype:protein_coding gene_symbol:Slk description:STE20-like kinase [Source:MGI Symbol;Acc:MGI:103241]	17	22	23	31	1233	141.4	5.14	0.970674	1.02672	0.945416	0.652158
ENSMUSP00000016033	leukotriene A4 hydrolase	Lta4h	pep chromosome:GRCm39:10:93289273:93320736:1 gene:ENSMUSG00000015889.9 transcript:ENSMUST00000016033.9 gene_biotype:protein_coding transcript_biotype:protein_coding gene_symbol:Lta4h description:leukotriene A4 hydrolase [Source:MGI Symbol;Acc:MGI:96836]	38	21	21	41	611	69	6.42	0.835841	0.813248	1.02778	0.894023
ENSMUSP00000007212	proteasome (prosome, macropain) 26S subunit, non-ATPase, 2	Psmd2	pep chromosome:GRCm39:16:20470402:20482164:1 gene:ENSMUSG00000006998.17 transcript:ENSMUST00000007212.9 gene_biotype:protein_coding transcript_biotype:protein_coding gene_symbol:Psmd2 description:proteasome (prosome, macropain) 26S subunit, non-ATPase, 2 [Source:MGI Symbol;Acc:MGI:1096584]	23	20	20	28	908	100.1	5.17	1.031	1.01811	1.01266	0.969209
ENSMUSP00000034547	acetyl-Coenzyme A acetyltransferase 1	Acat1	pep chromosome:GRCm39:9:53491822:53521682:-1 gene:ENSMUSG00000032047.6 transcript:ENSMUST00000034547.6 gene_biotype:protein_coding transcript_biotype:protein_coding gene_symbol:Acat1 description:acetyl-Coenzyme A acetyltransferase 1 [Source:MGI Symbol;Acc:MGI:87870]	38	14	14	33	424	44.8	8.51	1.06103	0.971916	1.09169	0.604275
ENSMUSP00000001566	tubulin, beta 5 class I	Tubb5	pep chromosome:GRCm39:17:36144813:36149198:-1 gene:ENSMUSG00000001525.11 transcript:ENSMUST00000001566.10 gene_biotype:protein_coding transcript_biotype:protein_coding gene_symbol:Tubb5 description:tubulin, beta 5 class I [Source:MGI Symbol;Acc:MGI:107812]	35	2	12	55	444	49.6	4.89	0.866745	0.927635	0.93436	0.59238
ENSMUSP00000022622	PTK2 protein tyrosine kinase 2 beta	Ptk2b	pep chromosome:GRCm39:14:66390706:66518501:-1 gene:ENSMUSG00000059456.14 transcript:ENSMUST00000022622.14 gene_biotype:protein_coding transcript_biotype:protein_coding gene_symbol:Ptk2b description:PTK2 protein tyrosine kinase 2 beta [Source:MGI Symbol;Acc:MGI:104908]	22	23	24	38	1009	115.7	6.35	1.01972	1.08815	0.937112	0.607088
ENSMUSP00000116108	t-complex protein 1	Tcp1	pep chromosome:GRCm39:17:13135269:13143954:1 gene:ENSMUSG00000068039.14 transcript:ENSMUST00000151287.8 gene_biotype:protein_coding transcript_biotype:protein_coding gene_symbol:Tcp1 description:t-complex protein 1 [Source:MGI Symbol;Acc:MGI:98535]	30	15	15	35	556	60.4	6.16	0.897924	0.884352	1.01535	0.955728
ENSMUSP00000114159	peroxiredoxin 1	Prdx1	pep chromosome:GRCm39:4:116542741:116558019:1 gene:ENSMUSG00000028691.13 transcript:ENSMUST00000135573.8 gene_biotype:protein_coding transcript_biotype:protein_coding gene_symbol:Prdx1 description:peroxiredoxin 1 [Source:MGI Symbol;Acc:MGI:99523]	61	1	12	79	199	22.2	8.12	0.964972	1.21917	0.7915	0.0838032
ENSMUSP00000142326	guanine nucleotide binding protein (G protein), alpha inhibiting 2	Gnai2	pep chromosome:GRCm39:9:107491324:107512511:-1 gene:ENSMUSG00000032562.14 transcript:ENSMUST00000192615.6 gene_biotype:protein_coding transcript_biotype:protein_coding gene_symbol:Gnai2 description:guanine nucleotide binding protein (G protein), alpha inhibiting 2 [Source:MGI Symbol;Acc:MGI:95772]	50	8	14	49	355	40.5	5.45	1.14038	1.13337	1.00618	0.997893
ENSMUSP00000050771	polymerase (RNA) II (DNA directed) polypeptide A	Polr2a	pep chromosome:GRCm39:11:69624823:69649463:-1 gene:ENSMUSG00000005198.16 transcript:ENSMUST00000058470.16 gene_biotype:protein_coding transcript_biotype:protein_coding gene_symbol:Polr2a description:polymerase (RNA) II (DNA directed) polypeptide A [Source:MGI Symbol;Acc:MGI:98086]	12	26	26	31	1970	217	7.37	1.00539	0.982403	1.0234	0.915615
ENSMUSP00000132082	isoleucine-tRNA synthetase	Iars	pep chromosome:GRCm39:13:49835576:49887743:1 gene:ENSMUSG00000037851.14 transcript:ENSMUST00000165316.8 gene_biotype:protein_coding transcript_biotype:protein_coding gene_symbol:Iars description:isoleucine-tRNA synthetase [Source:MGI Symbol;Acc:MGI:2145219]	20	25	25	38	1262	144.2	6.55	0.938181	0.94667	0.991032	0.910987
ENSMUSP00000115822	niban apoptosis regulator 1	Niban1	pep chromosome:GRCm39:1:151447124:151597690:1 gene:ENSMUSG00000026483.14 transcript:ENSMUST00000148810.8 gene_biotype:protein_coding transcript_biotype:protein_coding gene_symbol:Niban1 description:niban apoptosis regulator 1 [Source:MGI Symbol;Acc:MGI:2137237]	22	20	20	36	926	102.6	4.78	0.856129	0.897608	0.953789	0.698506
ENSMUSP00000004375	prohibitin 2	Phb2	pep chromosome:GRCm39:6:124689299:124693913:1 gene:ENSMUSG00000004264.18 transcript:ENSMUST00000004375.16 gene_biotype:protein_coding transcript_biotype:protein_coding gene_symbol:Phb2 description:prohibitin 2 [Source:MGI Symbol;Acc:MGI:102520]	67	20	20	41	299	33.3	9.83	1.21206	1.20621	1.00485	0.990298
ENSMUSP00000002825	bromodomain adjacent to zinc finger domain, 1B	Baz1b	pep chromosome:GRCm39:5:135216118:135274983:1 gene:ENSMUSG00000002748.8 transcript:ENSMUST00000002825.6 gene_biotype:protein_coding transcript_biotype:protein_coding gene_symbol:Baz1b description:bromodomain adjacent to zinc finger domain, 1B [Source:MGI Symbol;Acc:MGI:1353499]	13	21	21	28	1479	170.5	8.6	0.983361	1.10405	0.890686	0.378995
ENSMUSP00000133166	endoplasmic reticulum aminopeptidase 1	Erap1	pep chromosome:GRCm39:13:74787687:74841320:1 gene:ENSMUSG00000021583.8 transcript:ENSMUST00000169114.3 gene_biotype:protein_coding transcript_biotype:protein_coding gene_symbol:Erap1 description:endoplasmic reticulum aminopeptidase 1 [Source:MGI Symbol;Acc:MGI:1933403]	18	18	18	34	930	106.5	6.2	0.930599	0.88141	1.05581	0.76041
ENSMUSP00000027810	fumarate hydratase 1	Fh1	pep chromosome:GRCm39:1:175427940:175453201:-1 gene:ENSMUSG00000026526.15 transcript:ENSMUST00000027810.14 gene_biotype:protein_coding transcript_biotype:protein_coding gene_symbol:Fh1 description:fumarate hydratase 1 [Source:MGI Symbol;Acc:MGI:95530]	36	15	15	33	507	54.3	9.04	1.06968	1.09413	0.977647	0.833971
ENSMUSP00000026841	hydroxyacyl-CoA dehydrogenase trifunctional multienzyme complex subunit beta	Hadhb	pep chromosome:GRCm39:5:30360246:30389591:1 gene:ENSMUSG00000059447.14 transcript:ENSMUST00000026841.15 gene_biotype:protein_coding transcript_biotype:protein_coding gene_symbol:Hadhb description:hydroxyacyl-CoA dehydrogenase trifunctional multienzyme complex subunit beta [Source:MGI Symbol;Acc:MGI:2136381]	40	17	17	41	475	51.4	9.38	1.1488	1.03484	1.11013	0.531848
ENSMUSP00000038555	phosphoenolpyruvate carboxykinase 2 (mitochondrial)	Pck2	pep chromosome:GRCm39:14:55777723:55787474:1 gene:ENSMUSG00000040618.8 transcript:ENSMUST00000048781.4 gene_biotype:protein_coding transcript_biotype:protein_coding gene_symbol:Pck2 description:phosphoenolpyruvate carboxykinase 2 (mitochondrial) [Source:MGI Symbol;Acc:MGI:1860456]	33	17	17	30	667	73.4	7.74	0.989495	1.06145	0.932209	0.580971
ENSMUSP00000034866	electron transferring flavoprotein, alpha polypeptide	Etfa	pep chromosome:GRCm39:9:55361792:55419527:-1 gene:ENSMUSG00000032314.15 transcript:ENSMUST00000034866.9 gene_biotype:protein_coding transcript_biotype:protein_coding gene_symbol:Etfa description:electron transferring flavoprotein, alpha polypeptide [Source:MGI Symbol;Acc:MGI:106092]	55	14	14	31	333	35	8.38	1.29433	1.17812	1.09864	0.576318
ENSMUSP00000063389	capping protein (actin filament), gelsolin-like	Capg	pep chromosome:GRCm39:6:72521374:72539966:1 gene:ENSMUSG00000056737.15 transcript:ENSMUST00000071044.13 gene_biotype:protein_coding transcript_biotype:protein_coding gene_symbol:Capg description:capping protein (actin filament), gelsolin-like [Source:MGI Symbol;Acc:MGI:1098259]	32	9	9	31	349	38.7	6.95	0.957887	1.14907	0.833618	0.175073
ENSMUSP00000135647	heterogeneous nuclear ribonucleoprotein K	Hnrnpk	pep chromosome:GRCm39:13:58539053:58550278:-1 gene:ENSMUSG00000021546.19 transcript:ENSMUST00000177019.8 gene_biotype:protein_coding transcript_biotype:protein_coding gene_symbol:Hnrnpk description:heterogeneous nuclear ribonucleoprotein K [Source:MGI Symbol;Acc:MGI:99894]	45	18	18	40	440	48.5	5.54	0.999515	1.22607	0.815219	0.129359
ENSMUSP00000048084	nucleoporin 133	Nup133	pep chromosome:GRCm39:8:124623862:124676004:-1 gene:ENSMUSG00000039509.9 transcript:ENSMUST00000044795.8 gene_biotype:protein_coding transcript_biotype:protein_coding gene_symbol:Nup133 description:nucleoporin 133 [Source:MGI Symbol;Acc:MGI:2442620]	20	21	21	31	1155	128.5	5.2	1.09937	1.18281	0.929453	0.566462
ENSMUSP00000096939	plexin C1	Plxnc1	pep chromosome:GRCm39:10:94626728:94780697:-1 gene:ENSMUSG00000074785.6 transcript:ENSMUST00000099337.5 gene_biotype:protein_coding transcript_biotype:protein_coding gene_symbol:Plxnc1 description:plexin C1 [Source:MGI Symbol;Acc:MGI:1890127]	17	22	22	26	1574	176.4	7.75	1.0077	0.960649	1.04898	0.792131
ENSMUSP00000032998	ribosomal protein S3	Rps3	pep chromosome:GRCm39:7:99127103:99132945:-1 gene:ENSMUSG00000030744.14 transcript:ENSMUST00000032998.13 gene_biotype:protein_coding transcript_biotype:protein_coding gene_symbol:Rps3 description:ribosomal protein S3 [Source:MGI Symbol;Acc:MGI:1350917]	80	19	19	49	243	26.7	9.66	1.00173	1.00387	0.997873	0.950316
ENSMUSP00000101476	heterogeneous nuclear ribonucleoprotein R	Hnrnpr	pep chromosome:GRCm39:4:136038279:136067992:1 gene:ENSMUSG00000066037.15 transcript:ENSMUST00000105850.8 gene_biotype:protein_coding transcript_biotype:protein_coding gene_symbol:Hnrnpr description:heterogeneous nuclear ribonucleoprotein R [Source:MGI Symbol;Acc:MGI:1891692]	30	12	18	38	632	70.8	8.13	1.09779	1.00079	1.09693	0.583116
ENSMUSP00000046340	granulin	Grn	pep chromosome:GRCm39:11:102321148:102327633:1 gene:ENSMUSG00000034708.13 transcript:ENSMUST00000049460.12 gene_biotype:protein_coding transcript_biotype:protein_coding gene_symbol:Grn description:granulin [Source:MGI Symbol;Acc:MGI:95832]	30	13	13	40	602	65	6.99	1.0496	1.07613	0.975343	0.820745
ENSMUSP00000034441	alanyl-tRNA synthetase	Aars	pep chromosome:GRCm39:8:111760534:111784296:1 gene:ENSMUSG00000031960.15 transcript:ENSMUST00000034441.8 gene_biotype:protein_coding transcript_biotype:protein_coding gene_symbol:Aars description:alanyl-tRNA synthetase [Source:MGI Symbol;Acc:MGI:2384560]	19	20	20	37	968	106.8	5.67	1.01916	1.02587	0.993463	0.924972
ENSMUSP00000117068	WD repeat and FYVE domain containing 4	Wdfy4	pep chromosome:GRCm39:14:32681504:32907023:-1 gene:ENSMUSG00000051506.18 transcript:ENSMUST00000130509.10 gene_biotype:protein_coding transcript_biotype:protein_coding gene_symbol:Wdfy4 description:WD repeat and FYVE domain containing 4 [Source:MGI Symbol;Acc:MGI:3584510]	8	22	22	25	3183	354.1	6.34	0.811431	0.652868	1.24287	0.178254
ENSMUSP00000005953	sulfide quinone oxidoreductase	Sqor	pep chromosome:GRCm39:2:122607157:122651489:1 gene:ENSMUSG00000005803.15 transcript:ENSMUST00000005953.11 gene_biotype:protein_coding transcript_biotype:protein_coding gene_symbol:Sqor description:sulfide quinone oxidoreductase [Source:MGI Symbol;Acc:MGI:1929899]	35	18	18	31	450	50.3	9.09	1.00054	1.08703	0.920428	0.519925
ENSMUSP00000100075	LYN proto-oncogene, Src family tyrosine kinase	Lyn	pep chromosome:GRCm39:4:3678127:3791612:1 gene:ENSMUSG00000042228.15 transcript:ENSMUST00000103010.4 gene_biotype:protein_coding transcript_biotype:protein_coding gene_symbol:Lyn description:LYN proto-oncogene, Src family tyrosine kinase [Source:MGI Symbol;Acc:MGI:96892]	32	14	17	43	491	56.2	6.57	1.12453	0.884497	1.27138	0.135984
ENSMUSP00000150262	spectrin repeat containing, nuclear envelope 1	Syne1	pep chromosome:GRCm39:10:4970917:5500678:-1 gene:ENSMUSG00000096054.4 transcript:ENSMUST00000215295.2 gene_biotype:protein_coding transcript_biotype:protein_coding gene_symbol:Syne1 description:spectrin repeat containing, nuclear envelope 1 [Source:MGI Symbol;Acc:MGI:1927152]	3	24	26	35	8799	1009.3	5.58	0.942243	0.938804	1.00366	0.9835
ENSMUSP00000104173	rabaptin, RAB GTPase binding effector protein 1	Rabep1	pep chromosome:GRCm39:11:70735768:70831472:1 gene:ENSMUSG00000020817.17 transcript:ENSMUST00000108533.10 gene_biotype:protein_coding transcript_biotype:protein_coding gene_symbol:Rabep1 description:rabaptin, RAB GTPase binding effector protein 1 [Source:MGI Symbol;Acc:MGI:1860236]	23	20	20	27	864	99.7	5.01	0.975937	0.86169	1.13259	0.451435
ENSMUSP00000148107	lactate dehydrogenase A	Ldha	pep chromosome:GRCm39:7:46496506:46505050:1 gene:ENSMUSG00000063229.16 transcript:ENSMUST00000209984.2 gene_biotype:protein_coding transcript_biotype:protein_coding gene_symbol:Ldha description:lactate dehydrogenase A [Source:MGI Symbol;Acc:MGI:96759]	39	14	16	42	361	39.7	8.35	0.922332	0.997852	0.924317	0.539793
ENSMUSP00000110680	integrin beta 5	Itgb5	pep chromosome:GRCm39:16:33650035:33769708:1 gene:ENSMUSG00000022817.16 transcript:ENSMUST00000115028.11 gene_biotype:protein_coding transcript_biotype:protein_coding gene_symbol:Itgb5 description:integrin beta 5 [Source:MGI Symbol;Acc:MGI:96614]	28	18	19	27	799	88	6.07	0.994799	1.13659	0.875249	0.314647
ENSMUSP00000029386	electron transferring flavoprotein, dehydrogenase	Etfdh	pep chromosome:GRCm39:3:79511095:79536170:-1 gene:ENSMUSG00000027809.15 transcript:ENSMUST00000029386.14 gene_biotype:protein_coding transcript_biotype:protein_coding gene_symbol:Etfdh description:electron transferring flavoprotein, dehydrogenase [Source:MGI Symbol;Acc:MGI:106100]	30	18	18	35	616	68	7.58	1.18144	1.01729	1.16137	0.361131
ENSMUSP00000026667	eukaryotic translation initiation factor 4A3	Eif4a3	pep chromosome:GRCm39:11:119179189:119190915:-1 gene:ENSMUSG00000025580.16 transcript:ENSMUST00000026667.15 gene_biotype:protein_coding transcript_biotype:protein_coding gene_symbol:Eif4a3 description:eukaryotic translation initiation factor 4A3 [Source:MGI Symbol;Acc:MGI:1923731]	34	14	17	34	411	46.8	6.73	1.07946	1.09936	0.981905	0.858449
ENSMUSP00000060246	tubulin, beta 2A class IIA	Tubb2a	pep chromosome:GRCm39:13:34258257:34261990:-1 gene:ENSMUSG00000058672.8 transcript:ENSMUST00000056427.10 gene_biotype:protein_coding transcript_biotype:protein_coding gene_symbol:Tubb2a description:tubulin, beta 2A class IIA [Source:MGI Symbol;Acc:MGI:107861]	33	2	12	50	445	49.9	4.89	0.982688	1.05013	0.93578	0.599956
ENSMUSP00000122103	solute carrier family 25 (mitochondrial carrier, Aralar), member 12	Slc25a12	pep chromosome:GRCm39:2:71101407:71198093:-1 gene:ENSMUSG00000027010.17 transcript:ENSMUST00000151937.8 gene_biotype:protein_coding transcript_biotype:protein_coding gene_symbol:Slc25a12 description:solute carrier family 25 (mitochondrial carrier, Aralar), member 12 [Source:MGI Symbol;Acc:MGI:1926080]	25	14	17	34	677	74.5	8.25	1.05605	1.15487	0.914435	0.489912
ENSMUSP00000101012	Rho GTPase activating protein 45	Arhgap45	pep chromosome:GRCm39:10:79852750:79867303:1 gene:ENSMUSG00000035697.15 transcript:ENSMUST00000105373.8 gene_biotype:protein_coding transcript_biotype:protein_coding gene_symbol:Arhgap45 description:Rho GTPase activating protein 45 [Source:MGI Symbol;Acc:MGI:1917969]	19	19	19	31	1127	124	5.8	1.00182	0.987653	1.01435	0.960727
ENSMUSP00000034046	acyl-CoA synthetase long-chain family member 1	Acsl1	pep chromosome:GRCm39:8:46924074:46989088:1 gene:ENSMUSG00000018796.14 transcript:ENSMUST00000034046.13 gene_biotype:protein_coding transcript_biotype:protein_coding gene_symbol:Acsl1 description:acyl-CoA synthetase long-chain family member 1 [Source:MGI Symbol;Acc:MGI:102797]	31	18	21	27	699	77.9	7.15	1.1665	1.08208	1.07802	0.661511
ENSMUSP00000147502	RuvB-like protein 2	Ruvbl2	pep chromosome:GRCm39:7:45071184:45087520:-1 gene:ENSMUSG00000003868.15 transcript:ENSMUST00000211214.2 gene_biotype:protein_coding transcript_biotype:protein_coding gene_symbol:Ruvbl2 description:RuvB-like protein 2 [Source:MGI Symbol;Acc:MGI:1342299]	35	18	18	25	463	51.1	5.64	1.04895	1.06524	0.984715	0.874619
ENSMUSP00000031477	golgi autoantigen, golgin subfamily a, 3	Golga3	pep chromosome:GRCm39:5:110324745:110371067:1 gene:ENSMUSG00000029502.15 transcript:ENSMUST00000031477.9 gene_biotype:protein_coding transcript_biotype:protein_coding gene_symbol:Golga3 description:golgi autoantigen, golgin subfamily a, 3 [Source:MGI Symbol;Acc:MGI:96958]	15	20	20	24	1487	167.2	5.38	0.944891	0.911302	1.03686	0.849825
ENSMUSP00000029046	fatty acid binding protein 5, epidermal	Fabp5	pep chromosome:GRCm39:3:10077608:10081667:1 gene:ENSMUSG00000027533.11 transcript:ENSMUST00000029046.9 gene_biotype:protein_coding transcript_biotype:protein_coding gene_symbol:Fabp5 description:fatty acid binding protein 5, epidermal [Source:MGI Symbol;Acc:MGI:101790]	73	8	8	90	135	15.1	6.54	1.13953	1.02517	1.11155	0.526497
ENSMUSP00000034000	N-acylsphingosine amidohydrolase 1	Asah1	pep chromosome:GRCm39:8:41793234:41827810:-1 gene:ENSMUSG00000031591.15 transcript:ENSMUST00000034000.15 gene_biotype:protein_coding transcript_biotype:protein_coding gene_symbol:Asah1 description:N-acylsphingosine amidohydrolase 1 [Source:MGI Symbol;Acc:MGI:1277124]	36	16	16	47	394	44.6	8.46	0.789485	0.878385	0.898792	0.415317
ENSMUSP00000029814	mannosidase, beta A, lysosomal	Manba	pep chromosome:GRCm39:3:135191372:135277165:1 gene:ENSMUSG00000028164.16 transcript:ENSMUST00000029814.10 gene_biotype:protein_coding transcript_biotype:protein_coding gene_symbol:Manba description:mannosidase, beta A, lysosomal [Source:MGI Symbol;Acc:MGI:88175]	20	18	18	34	879	100.8	7.08	1.05789	0.932782	1.13412	0.446255
ENSMUSP00000026538	enoyl Coenzyme A hydratase, short chain, 1, mitochondrial	Echs1	pep chromosome:GRCm39:7:139685623:139696389:-1 gene:ENSMUSG00000025465.14 transcript:ENSMUST00000026538.13 gene_biotype:protein_coding transcript_biotype:protein_coding gene_symbol:Echs1 description:enoyl Coenzyme A hydratase, short chain, 1, mitochondrial [Source:MGI Symbol;Acc:MGI:2136460]	50	15	15	40	290	31.5	8.48	1.44106	1.25144	1.15153	0.390399
ENSMUSP00000017188	serine (or cysteine) peptidase inhibitor, clade B, member 6a	Serpinb6a	pep chromosome:GRCm39:13:34101910:34119979:-1 gene:ENSMUSG00000060147.16 transcript:ENSMUST00000017188.14 gene_biotype:protein_coding transcript_biotype:protein_coding gene_symbol:Serpinb6a description:serine (or cysteine) peptidase inhibitor, clade B, member 6a [Source:MGI Symbol;Acc:MGI:103123]	40	14	14	42	399	44.7	6.38	1.18206	1.02193	1.15669	0.37485
ENSMUSP00000123880	OPA1, mitochondrial dynamin like GTPase	Opa1	pep chromosome:GRCm39:16:29398198:29467818:1 gene:ENSMUSG00000038084.17 transcript:ENSMUST00000161186.8 gene_biotype:protein_coding transcript_biotype:protein_coding gene_symbol:Opa1 description:OPA1, mitochondrial dynamin like GTPase [Source:MGI Symbol;Acc:MGI:1921393]	21	21	21	32	997	115.5	7.55	1.15498	1.1727	0.984894	0.875649
ENSMUSP00000101669	tyrosyl-tRNA synthetase	Yars	pep chromosome:GRCm39:4:129083553:129113400:1 gene:ENSMUSG00000028811.13 transcript:ENSMUST00000106054.4 gene_biotype:protein_coding transcript_biotype:protein_coding gene_symbol:Yars description:tyrosyl-tRNA synthetase [Source:MGI Symbol;Acc:MGI:2147627]	35	19	19	29	528	59.1	7.01	0.953972	0.975972	0.977459	0.832887
ENSMUSP00000097743	ATP-binding cassette, sub-family C (CFTR/MRP), member 1	Abcc1	pep chromosome:GRCm39:16:14179424:14293601:1 gene:ENSMUSG00000023088.18 transcript:ENSMUST00000100167.10 gene_biotype:protein_coding transcript_biotype:protein_coding gene_symbol:Abcc1 description:ATP-binding cassette, sub-family C (CFTR/MRP), member 1 [Source:MGI Symbol;Acc:MGI:102676]	15	20	21	30	1528	171.1	7.36	1.01626	0.941361	1.07956	0.654909
ENSMUSP00000072334	engulfment and cell motility 1	Elmo1	pep chromosome:GRCm39:13:20274789:20792523:1 gene:ENSMUSG00000041112.18 transcript:ENSMUST00000072519.7 gene_biotype:protein_coding transcript_biotype:protein_coding gene_symbol:Elmo1 description:engulfment and cell motility 1 [Source:MGI Symbol;Acc:MGI:2153044]	33	19	22	38	727	83.9	6.28	1.04871	1.03866	1.00967	0.984257
ENSMUSP00000018651	transient receptor potential cation channel, subfamily V, member 2	Trpv2	pep chromosome:GRCm39:11:62465364:62491341:1 gene:ENSMUSG00000018507.17 transcript:ENSMUST00000018651.14 gene_biotype:protein_coding transcript_biotype:protein_coding gene_symbol:Trpv2 description:transient receptor potential cation channel, subfamily V, member 2 [Source:MGI Symbol;Acc:MGI:1341836]	29	18	18	27	756	85.9	6.99	1.1468	1.01012	1.13531	0.442273
ENSMUSP00000034049	solute carrier family 25 (mitochondrial carrier, adenine nucleotide translocator), member 4	Slc25a4	pep chromosome:GRCm39:8:46659834:46664321:-1 gene:ENSMUSG00000031633.5 transcript:ENSMUST00000034049.5 gene_biotype:protein_coding transcript_biotype:protein_coding gene_symbol:Slc25a4 description:solute carrier family 25 (mitochondrial carrier, adenine nucleotide translocator), member 4 [Source:MGI Symbol;Acc:MGI:1353495]	44	7	15	57	298	32.9	9.72	0.974888	0.859063	1.13483	0.443886
ENSMUSP00000107237	heterogeneous nuclear ribonucleoprotein C	Hnrnpc	pep chromosome:GRCm39:14:52310834:52341485:-1 gene:ENSMUSG00000060373.16 transcript:ENSMUST00000111610.12 gene_biotype:protein_coding transcript_biotype:protein_coding gene_symbol:Hnrnpc description:heterogeneous nuclear ribonucleoprotein C [Source:MGI Symbol;Acc:MGI:107795]	39	14	14	29	313	34.4	5.05	1.12899	0.984548	1.14671	0.405343
ENSMUSP00000059717	SAM domain and HD domain, 1	Samhd1	pep chromosome:GRCm39:2:156939453:156977185:-1 gene:ENSMUSG00000027639.17 transcript:ENSMUST00000057725.10 gene_biotype:protein_coding transcript_biotype:protein_coding gene_symbol:Samhd1 description:SAM domain and HD domain, 1 [Source:MGI Symbol;Acc:MGI:1927468]	32	19	20	41	658	75.8	7.93	0.986995	0.934572	1.05609	0.759093
ENSMUSP00000036915	VPS18 CORVET/HOPS core subunit	Vps18	pep chromosome:GRCm39:2:119119223:119128934:1 gene:ENSMUSG00000034216.13 transcript:ENSMUST00000037280.5 gene_biotype:protein_coding transcript_biotype:protein_coding gene_symbol:Vps18 description:VPS18 CORVET/HOPS core subunit [Source:MGI Symbol;Acc:MGI:2443626]	22	18	18	25	973	110.1	6.09	1.02318	1.09194	0.937031	0.606653
ENSMUSP00000028238	RAB14, member RAS oncogene family	Rab14	pep chromosome:GRCm39:2:35070217:35091132:-1 gene:ENSMUSG00000026878.18 transcript:ENSMUST00000028238.15 gene_biotype:protein_coding transcript_biotype:protein_coding gene_symbol:Rab14 description:RAB14, member RAS oncogene family [Source:MGI Symbol;Acc:MGI:1915615]	81	12	13	50	215	23.9	6.21	1.18755	1.1373	1.04418	0.814797
ENSMUSP00000106481	dihydrolipoamide dehydrogenase	Dld	pep chromosome:GRCm39:12:31381276:31401452:-1 gene:ENSMUSG00000020664.11 transcript:ENSMUST00000110857.5 gene_biotype:protein_coding transcript_biotype:protein_coding gene_symbol:Dld description:dihydrolipoamide dehydrogenase [Source:MGI Symbol;Acc:MGI:107450]	33	15	15	31	509	54.2	7.9	1.1557	1.17081	0.987101	0.888359
ENSMUSP00000001834	RNA 2',3'-cyclic phosphate and 5'-OH ligase	Rtcb	pep chromosome:GRCm39:10:85774501:85793687:-1 gene:ENSMUSG00000001783.4 transcript:ENSMUST00000001834.4 gene_biotype:protein_coding transcript_biotype:protein_coding gene_symbol:Rtcb description:RNA 2',3'-cyclic phosphate and 5'-OH ligase [Source:MGI Symbol;Acc:MGI:106379]	36	15	15	32	505	55.2	7.23	1.10965	0.994326	1.11598	0.510065
ENSMUSP00000031524	acyl-Coenzyme A dehydrogenase, short chain	Acads	pep chromosome:GRCm39:5:115248358:115257405:-1 gene:ENSMUSG00000029545.14 transcript:ENSMUST00000031524.11 gene_biotype:protein_coding transcript_biotype:protein_coding gene_symbol:Acads description:acyl-Coenzyme A dehydrogenase, short chain [Source:MGI Symbol;Acc:MGI:87868]	40	14	14	30	412	44.9	8.47	0.948641	0.925532	1.02497	0.907867
ENSMUSP00000069432	GCN1 activator of EIF2AK4	Gcn1	pep chromosome:GRCm39:5:115703313:115760713:1 gene:ENSMUSG00000041638.19 transcript:ENSMUST00000064454.12 gene_biotype:protein_coding transcript_biotype:protein_coding gene_symbol:Gcn1 description:GCN1 activator of EIF2AK4 [Source:MGI Symbol;Acc:MGI:2444248]	9	25	25	27	2671	292.8	7.36	0.954044	1.10107	0.866469	0.281014
ENSMUSP00000031697	cullin 1	Cul1	pep chromosome:GRCm39:6:47431254:47503073:1 gene:ENSMUSG00000029686.16 transcript:ENSMUST00000031697.9 gene_biotype:protein_coding transcript_biotype:protein_coding gene_symbol:Cul1 description:cullin 1 [Source:MGI Symbol;Acc:MGI:1349658]	24	20	20	27	776	89.6	8	0.890811	0.911567	0.97723	0.831577
ENSMUSP00000149620	DEAD (Asp-Glu-Ala-Asp) box polypeptide 6	Ddx6	pep chromosome:GRCm39:9:44516193:44552028:1 gene:ENSMUSG00000032097.11 transcript:ENSMUST00000217034.2 gene_biotype:protein_coding transcript_biotype:protein_coding gene_symbol:Ddx6 description:DEAD (Asp-Glu-Ala-Asp) box polypeptide 6 [Source:MGI Symbol;Acc:MGI:104976]	30	13	13	33	483	54.2	8.66	0.782028	0.86561	0.903441	0.436887
ENSMUSP00000021443	methylenetetrahydrofolate dehydrogenase (NADP+ dependent), methenyltetrahydrofolate cyclohydrolase, formyltetrahydrofolate synthase	Mthfd1	pep chromosome:GRCm39:12:76302072:76366577:1 gene:ENSMUSG00000021048.8 transcript:ENSMUST00000021443.7 gene_biotype:protein_coding transcript_biotype:protein_coding gene_symbol:Mthfd1 description:methylenetetrahydrofolate dehydrogenase (NADP+ dependent), methenyltetrahydrofolate cyclohydrolase, formyltetrahydrofolate synthase [Source:MGI Symbol;Acc:MGI:1342005]	23	19	20	30	935	101.1	7.14	0.990524	1.13421	0.873314	0.307047
ENSMUSP00000074483	heterogeneous nuclear ribonucleoprotein H2	Hnrnph2	pep chromosome:GRCm39:X:133501928:133507803:1 gene:ENSMUSG00000045427.14 transcript:ENSMUST00000074950.11 gene_biotype:protein_coding transcript_biotype:protein_coding gene_symbol:Hnrnph2 description:heterogeneous nuclear ribonucleoprotein H2 [Source:MGI Symbol;Acc:MGI:1201779]	37	6	11	25	449	49.2	6.3	0.95753	0.963197	0.994116	0.92873
ENSMUSP00000003527	suppressor of Ty 5, DSIF elongation factor subunit	Supt5	pep chromosome:GRCm39:7:28014319:28038144:-1 gene:ENSMUSG00000003435.10 transcript:ENSMUST00000003527.10 gene_biotype:protein_coding transcript_biotype:protein_coding gene_symbol:Supt5 description:suppressor of Ty 5, DSIF elongation factor subunit [Source:MGI Symbol;Acc:MGI:1202400]	18	20	20	32	1082	120.6	5.05	0.907058	0.969867	0.93524	0.59707
ENSMUSP00000004729	electron transferring flavoprotein, beta polypeptide	Etfb	pep chromosome:GRCm39:7:43093507:43107224:1 gene:ENSMUSG00000004610.5 transcript:ENSMUST00000004729.5 gene_biotype:protein_coding transcript_biotype:protein_coding gene_symbol:Etfb description:electron transferring flavoprotein, beta polypeptide [Source:MGI Symbol;Acc:MGI:106098]	66	14	14	40	255	27.6	8.1	1.33161	1.25571	1.06045	0.739191
ENSMUSP00000033992	glutathione reductase	Gsr	pep chromosome:GRCm39:8:34143266:34188191:1 gene:ENSMUSG00000031584.17 transcript:ENSMUST00000033992.9 gene_biotype:protein_coding transcript_biotype:protein_coding gene_symbol:Gsr description:glutathione reductase [Source:MGI Symbol;Acc:MGI:95804]	28	12	12	23	500	53.6	7.99	1.03549	0.939792	1.10183	0.563748
ENSMUSP00000004574	DnaJ heat shock protein family (Hsp40) member B11	Dnajb11	pep chromosome:GRCm39:16:22676595:22691138:1 gene:ENSMUSG00000004460.18 transcript:ENSMUST00000004574.14 gene_biotype:protein_coding transcript_biotype:protein_coding gene_symbol:Dnajb11 description:DnaJ heat shock protein family (Hsp40) member B11 [Source:MGI Symbol;Acc:MGI:1915088]	34	13	13	28	358	40.5	6.32	1.11471	1.14851	0.970572	0.793426
ENSMUSP00000030454	peroxiredoxin 1	Prdx1	pep chromosome:GRCm39:4:116544509:116556383:1 gene:ENSMUSG00000028691.13 transcript:ENSMUST00000030454.6 gene_biotype:protein_coding transcript_biotype:protein_coding gene_symbol:Prdx1 description:peroxiredoxin 1 [Source:MGI Symbol;Acc:MGI:99523]	61	1	12	78	176	19.5	6.77	1.05736	1.07431	0.984227	0.871809
ENSMUSP00000158574	phosphatidylinositol 4-kinase type 2 alpha	Pi4k2a	pep chromosome:GRCm39:19:42078909:42110470:1 gene:ENSMUSG00000025178.10 transcript:ENSMUST00000235932.2 gene_biotype:protein_coding transcript_biotype:protein_coding gene_symbol:Pi4k2a description:phosphatidylinositol 4-kinase type 2 alpha [Source:MGI Symbol;Acc:MGI:1934031]	42	20	20	32	479	54.2	8.05	1.20311	1.01736	1.18259	0.30358
ENSMUSP00000015877	capping protein (actin filament) muscle Z-line, alpha 2	Capza2	pep chromosome:GRCm39:6:17636982:17666971:1 gene:ENSMUSG00000015733.14 transcript:ENSMUST00000015877.14 gene_biotype:protein_coding transcript_biotype:protein_coding gene_symbol:Capza2 description:capping protein (actin filament) muscle Z-line, alpha 2 [Source:MGI Symbol;Acc:MGI:106222]	70	11	13	55	286	32.9	5.85	1.10245	1.08953	1.01186	0.973224
ENSMUSP00000152609	ferritin light polypeptide 1, pseudogene 1	Ftl1-ps1	pep chromosome:GRCm39:13:74554528:74555465:1 gene:ENSMUSG00000062382.10 transcript:ENSMUST00000222435.2 gene_biotype:protein_coding transcript_biotype:protein_coding gene_symbol:Ftl1-ps1 description:ferritin light polypeptide 1, pseudogene 1 [Source:MGI Symbol;Acc:MGI:3779109]	73	10	10	38	183	20.8	6	1.36567	1.48267	0.921091	0.523294
ENSMUSP00000040756	ATPase, H+ transporting, lysosomal V1 subunit H	Atp6v1h	pep chromosome:GRCm39:1:5153303:5232752:1 gene:ENSMUSG00000033793.13 transcript:ENSMUST00000044369.13 gene_biotype:protein_coding transcript_biotype:protein_coding gene_symbol:Atp6v1h description:ATPase, H+ transporting, lysosomal V1 subunit H [Source:MGI Symbol;Acc:MGI:1914864]	33	14	14	31	483	55.8	6.61	1.20251	1.13931	1.05547	0.761963
ENSMUSP00000044827	MYB binding protein (P160) 1a	Mybbp1a	pep chromosome:GRCm39:11:72332181:72342594:1 gene:ENSMUSG00000040463.17 transcript:ENSMUST00000045633.6 gene_biotype:protein_coding transcript_biotype:protein_coding gene_symbol:Mybbp1a description:MYB binding protein (P160) 1a [Source:MGI Symbol;Acc:MGI:106181]	17	21	21	30	1344	151.9	8.95	1.12302	1.16661	0.962628	0.748224
ENSMUSP00000030986	low density lipoprotein receptor-related protein associated protein 1	Lrpap1	pep chromosome:GRCm39:5:35248845:35263110:-1 gene:ENSMUSG00000029103.17 transcript:ENSMUST00000030986.15 gene_biotype:protein_coding transcript_biotype:protein_coding gene_symbol:Lrpap1 description:low density lipoprotein receptor-related protein associated protein 1 [Source:MGI Symbol;Acc:MGI:96829]	49	19	19	42	360	42.2	7.87	1.18513	1.22997	0.963548	0.753435
ENSMUSP00000022894	tyrosine 3-monooxygenase/tryptophan 5-monooxygenase activation protein, zeta polypeptide	Ywhaz	pep chromosome:GRCm39:15:36771014:36794782:-1 gene:ENSMUSG00000022285.18 transcript:ENSMUST00000022894.14 gene_biotype:protein_coding transcript_biotype:protein_coding gene_symbol:Ywhaz description:tyrosine 3-monooxygenase/tryptophan 5-monooxygenase activation protein, zeta polypeptide [Source:MGI Symbol;Acc:MGI:109484]	58	9	14	40	245	27.8	4.79	0.951318	0.963684	0.987169	0.888745
ENSMUSP00000149483	interleukin enhancer binding factor 3	Ilf3	pep chromosome:GRCm39:9:21284769:21316617:1 gene:ENSMUSG00000032178.15 transcript:ENSMUST00000213603.2 gene_biotype:protein_coding transcript_biotype:protein_coding gene_symbol:Ilf3 description:interleukin enhancer binding factor 3 [Source:MGI Symbol;Acc:MGI:1339973]	24	19	19	29	911	97.7	8.95	1.05597	1.03967	1.01568	0.954078
ENSMUSP00000107829	protein kinase C, delta	Prkcd	pep chromosome:GRCm39:14:30317311:30348167:-1 gene:ENSMUSG00000021948.18 transcript:ENSMUST00000112210.11 gene_biotype:protein_coding transcript_biotype:protein_coding gene_symbol:Prkcd description:protein kinase C, delta [Source:MGI Symbol;Acc:MGI:97598]	31	18	19	37	674	77.5	7.39	0.45634	0.432272	1.05568	0.761
ENSMUSP00000147514	cofilin 1, non-muscle	Cfl1	pep chromosome:GRCm39:19:5540483:5545229:1 gene:ENSMUSG00000056201.9 transcript:ENSMUST00000209469.2 gene_biotype:protein_coding transcript_biotype:protein_coding gene_symbol:Cfl1 description:cofilin 1, non-muscle [Source:MGI Symbol;Acc:MGI:101757]	62	13	15	52	166	18.5	8.09	1.12001	1.08168	1.03543	0.856702
ENSMUSP00000004745	syntaxin binding protein 2	Stxbp2	pep chromosome:GRCm39:8:3681170:3692795:1 gene:ENSMUSG00000004626.15 transcript:ENSMUST00000004745.9 gene_biotype:protein_coding transcript_biotype:protein_coding gene_symbol:Stxbp2 description:syntaxin binding protein 2 [Source:MGI Symbol;Acc:MGI:107370]	34	18	19	32	594	66.4	6.74	1.04136	1.03523	1.00592	0.996386
ENSMUSP00000022842	chaperonin containing Tcp1, subunit 5 (epsilon)	Cct5	pep chromosome:GRCm39:15:31590946:31601950:-1 gene:ENSMUSG00000022234.16 transcript:ENSMUST00000022842.16 gene_biotype:protein_coding transcript_biotype:protein_coding gene_symbol:Cct5 description:chaperonin containing Tcp1, subunit 5 (epsilon) [Source:MGI Symbol;Acc:MGI:107185]	33	18	19	34	541	59.6	6.02	1.00077	0.92915	1.07708	0.665529
ENSMUSP00000076933	actin related protein 2/3 complex, subunit 5	Arpc5	pep chromosome:GRCm39:1:152642293:152651348:1 gene:ENSMUSG00000008475.14 transcript:ENSMUST00000077755.11 gene_biotype:protein_coding transcript_biotype:protein_coding gene_symbol:Arpc5 description:actin related protein 2/3 complex, subunit 5 [Source:MGI Symbol;Acc:MGI:1915021]	76	12	12	26	151	16.3	5.67	1.1867	0.945312	1.25535	0.158556
ENSMUSP00000042342	tubulin, beta 4B class IVB	Tubb4b	pep chromosome:GRCm39:2:25112172:25114714:-1 gene:ENSMUSG00000036752.5 transcript:ENSMUST00000043584.5 gene_biotype:protein_coding transcript_biotype:protein_coding gene_symbol:Tubb4b description:tubulin, beta 4B class IVB [Source:MGI Symbol;Acc:MGI:1915472]	33	2	12	52	445	49.8	4.89	0.990398	1.17004	0.846465	0.212741
ENSMUSP00000133649	synaptotagmin binding, cytoplasmic RNA interacting protein	Syncrip	pep chromosome:GRCm39:9:88337631:88364608:-1 gene:ENSMUSG00000032423.13 transcript:ENSMUST00000173801.8 gene_biotype:protein_coding transcript_biotype:protein_coding gene_symbol:Syncrip description:synaptotagmin binding, cytoplasmic RNA interacting protein [Source:MGI Symbol;Acc:MGI:1891690]	36	13	19	34	623	69.6	8.59	1.0742	1.10342	0.973516	0.810274
ENSMUSP00000151439	formin-like 1	Fmnl1	pep chromosome:GRCm39:11:103061933:103089727:1 gene:ENSMUSG00000055805.16 transcript:ENSMUST00000218163.2 gene_biotype:protein_coding transcript_biotype:protein_coding gene_symbol:Fmnl1 description:formin-like 1 [Source:MGI Symbol;Acc:MGI:1888994]	16	18	20	29	1100	122.6	5.88	0.977945	1.06643	0.917023	0.502784
ENSMUSP00000034326	ATPase type 13A1	Atp13a1	pep chromosome:GRCm39:8:70243813:70260399:1 gene:ENSMUSG00000031862.12 transcript:ENSMUST00000034326.7 gene_biotype:protein_coding transcript_biotype:protein_coding gene_symbol:Atp13a1 description:ATPase type 13A1 [Source:MGI Symbol;Acc:MGI:2180801]	21	21	21	31	1200	132.3	8.03	1.08351	1.06886	1.01371	0.963947
ENSMUSP00000047678	eukaryotic translation initiation factor 4, gamma 1	Eif4g1	pep chromosome:GRCm39:16:20491473:20511634:1 gene:ENSMUSG00000045983.17 transcript:ENSMUST00000044783.14 gene_biotype:protein_coding transcript_biotype:protein_coding gene_symbol:Eif4g1 description:eukaryotic translation initiation factor 4, gamma 1 [Source:MGI Symbol;Acc:MGI:2384784]	11	19	22	31	1600	176	5.4	0.991334	1.10918	0.893753	0.39254
ENSMUSP00000019514	calmodulin 3	Calm3	pep chromosome:GRCm39:7:16649304:16658039:-1 gene:ENSMUSG00000019370.11 transcript:ENSMUST00000019514.10 gene_biotype:protein_coding transcript_biotype:protein_coding gene_symbol:Calm3 description:calmodulin 3 [Source:MGI Symbol;Acc:MGI:103249]	62	11	11	49	149	16.8	4.22	1.25618	1.10727	1.13448	0.445041
ENSMUSP00000159299	proteasome (prosome, macropain) 26S subunit, ATPase 2	Psmc2	pep chromosome:GRCm39:5:21990281:22008775:1 gene:ENSMUSG00000028932.9 transcript:ENSMUST00000239497.2 gene_biotype:protein_coding transcript_biotype:protein_coding gene_symbol:Psmc2 description:proteasome (prosome, macropain) 26S subunit, ATPase 2 [Source:MGI Symbol;Acc:MGI:109555]	34	16	16	33	475	52.8	6.28	0.920018	0.926455	0.993052	0.922613
ENSMUSP00000023128	integrin alpha 5 (fibronectin receptor alpha)	Itga5	pep chromosome:GRCm39:15:103252713:103275190:-1 gene:ENSMUSG00000000555.9 transcript:ENSMUST00000023128.8 gene_biotype:protein_coding transcript_biotype:protein_coding gene_symbol:Itga5 description:integrin alpha 5 (fibronectin receptor alpha) [Source:MGI Symbol;Acc:MGI:96604]	17	18	18	39	1053	115	5.95	1.10762	1.02824	1.07719	0.665047
ENSMUSP00000021049	protease (prosome, macropain) 26S subunit, ATPase 5	Psmc5	pep chromosome:GRCm39:11:106146980:106153946:1 gene:ENSMUSG00000020708.13 transcript:ENSMUST00000021049.9 gene_biotype:protein_coding transcript_biotype:protein_coding gene_symbol:Psmc5 description:protease (prosome, macropain) 26S subunit, ATPase 5 [Source:MGI Symbol;Acc:MGI:105047]	50	18	19	40	406	45.6	7.55	0.983471	1.03359	0.951514	0.685833
ENSMUSP00000019109	tyrosine 3-monooxygenase/tryptophan 5-monooxygenase activation protein, eta polypeptide	Ywhah	pep chromosome:GRCm39:5:33176160:33185310:1 gene:ENSMUSG00000018965.12 transcript:ENSMUST00000019109.8 gene_biotype:protein_coding transcript_biotype:protein_coding gene_symbol:Ywhah description:tyrosine 3-monooxygenase/tryptophan 5-monooxygenase activation protein, eta polypeptide [Source:MGI Symbol;Acc:MGI:109194]	68	11	16	41	246	28.2	4.89	0.972808	1.05884	0.918745	0.511422
ENSMUSP00000123605	tyrosine 3-monooxygenase/tryptophan 5-monooxygenase activation protein theta	Ywhaq	pep chromosome:GRCm39:12:21440072:21467638:-1 gene:ENSMUSG00000076432.14 transcript:ENSMUST00000135088.9 gene_biotype:protein_coding transcript_biotype:protein_coding gene_symbol:Ywhaq description:tyrosine 3-monooxygenase/tryptophan 5-monooxygenase activation protein theta [Source:MGI Symbol;Acc:MGI:891963]	57	8	14	46	245	27.8	4.78	0.941744	0.774316	1.21623	0.227115
ENSMUSP00000124382	ubiquitin specific peptidase 7	Usp7	pep chromosome:GRCm39:16:8507459:8610172:-1 gene:ENSMUSG00000022710.18 transcript:ENSMUST00000160405.8 gene_biotype:protein_coding transcript_biotype:protein_coding gene_symbol:Usp7 description:ubiquitin specific peptidase 7 [Source:MGI Symbol;Acc:MGI:2182061]	17	18	18	25	1143	132.8	5.66	0.892353	0.913396	0.976962	0.830036
ENSMUSP00000048350	vesicle amine transport 1	Vat1	pep chromosome:GRCm39:11:101349571:101357056:-1 gene:ENSMUSG00000034993.8 transcript:ENSMUST00000040430.8 gene_biotype:protein_coding transcript_biotype:protein_coding gene_symbol:Vat1 description:vesicle amine transport 1 [Source:MGI Symbol;Acc:MGI:1349450]	45	14	14	48	406	43.1	6.37	1.22708	1.03193	1.18911	0.287363
ENSMUSP00000115723	phosphatidylinositol transfer protein, alpha	Pitpna	pep chromosome:GRCm39:11:75478923:75519630:1 gene:ENSMUSG00000017781.18 transcript:ENSMUST00000143219.8 gene_biotype:protein_coding transcript_biotype:protein_coding gene_symbol:Pitpna description:phosphatidylinositol transfer protein, alpha [Source:MGI Symbol;Acc:MGI:99887]	60	16	18	46	271	31.9	6.37	1.02303	0.965366	1.05974	0.742421
ENSMUSP00000001479	karyopherin (importin) beta 1	Kpnb1	pep chromosome:GRCm39:11:97050540:97078707:-1 gene:ENSMUSG00000001440.6 transcript:ENSMUST00000001479.5 gene_biotype:protein_coding transcript_biotype:protein_coding gene_symbol:Kpnb1 description:karyopherin (importin) beta 1 [Source:MGI Symbol;Acc:MGI:107532]	24	19	19	32	876	97.1	4.78	1.02424	1.09346	0.936697	0.604863
ENSMUSP00000024988	complement component 3	C3	pep chromosome:GRCm39:17:57510970:57535136:-1 gene:ENSMUSG00000024164.16 transcript:ENSMUST00000024988.15 gene_biotype:protein_coding transcript_biotype:protein_coding gene_symbol:C3 description:complement component 3 [Source:MGI Symbol;Acc:MGI:88227]	12	19	19	25	1663	186.4	6.73	0.892696	0.913912	0.976785	0.829022
ENSMUSP00000101913	integrin alpha L	Itgal	pep chromosome:GRCm39:7:126895463:126934310:1 gene:ENSMUSG00000030830.19 transcript:ENSMUST00000106306.9 gene_biotype:protein_coding transcript_biotype:protein_coding gene_symbol:Itgal description:integrin alpha L [Source:MGI Symbol;Acc:MGI:96606]	17	17	17	29	1162	128.2	5.92	0.944256	0.8706	1.0846	0.633569
ENSMUSP00000033325	SWA-70 protein	Swap70	pep chromosome:GRCm39:7:109820918:109882713:1 gene:ENSMUSG00000031015.9 transcript:ENSMUST00000033325.9 gene_biotype:protein_coding transcript_biotype:protein_coding gene_symbol:Swap70 description:SWA-70 protein [Source:MGI Symbol;Acc:MGI:1298390]	30	17	17	25	585	69	6.05	0.913259	0.851772	1.07219	0.686796
ENSMUSP00000037348	acetyl-Coenzyme A acyltransferase 2 (mitochondrial 3-oxoacyl-Coenzyme A thiolase)	Acaa2	pep chromosome:GRCm39:18:74912268:74939279:1 gene:ENSMUSG00000036880.11 transcript:ENSMUST00000041053.11 gene_biotype:protein_coding transcript_biotype:protein_coding gene_symbol:Acaa2 description:acetyl-Coenzyme A acyltransferase 2 (mitochondrial 3-oxoacyl-Coenzyme A thiolase) [Source:MGI Symbol;Acc:MGI:1098623]	56	16	16	30	397	41.8	8.09	1.3161	0.974072	1.35113	0.0602083
ENSMUSP00000035743	brain glycogen phosphorylase	Pygb	pep chromosome:GRCm39:2:150628655:150673678:1 gene:ENSMUSG00000033059.8 transcript:ENSMUST00000045441.8 gene_biotype:protein_coding transcript_biotype:protein_coding gene_symbol:Pygb description:brain glycogen phosphorylase [Source:MGI Symbol;Acc:MGI:97828]	24	15	20	35	843	96.7	6.73	1.02974	0.907727	1.13441	0.445281
ENSMUSP00000054863	poly(rC) binding protein 1	Pcbp1	pep chromosome:GRCm39:6:86501474:86503303:-1 gene:ENSMUSG00000051695.7 transcript:ENSMUST00000053015.7 gene_biotype:protein_coding transcript_biotype:protein_coding gene_symbol:Pcbp1 description:poly(rC) binding protein 1 [Source:MGI Symbol;Acc:MGI:1345635]	47	8	13	25	356	37.5	7.09	0.923969	1.15003	0.803429	0.104926
ENSMUSP00000110987	protein kinase C substrate 80K-H	Prkcsh	pep chromosome:GRCm39:9:21914362:21925516:1 gene:ENSMUSG00000003402.15 transcript:ENSMUST00000115331.10 gene_biotype:protein_coding transcript_biotype:protein_coding gene_symbol:Prkcsh description:protein kinase C substrate 80K-H [Source:MGI Symbol;Acc:MGI:107877]	25	15	15	32	528	59.5	4.48	1.15417	1.11035	1.03946	0.837288
ENSMUSP00000159019	SAC1 suppressor of actin mutations 1-like (yeast)	Sacm1l	pep chromosome:GRCm39:9:123358824:123421665:1 gene:ENSMUSG00000025240.11 transcript:ENSMUST00000239083.2 gene_biotype:protein_coding transcript_biotype:protein_coding gene_symbol:Sacm1l description:SAC1 suppressor of actin mutations 1-like (yeast) [Source:MGI Symbol;Acc:MGI:1933169]	37	21	21	31	609	69.4	7.28	1.07518	1.03351	1.04032	0.833171
ENSMUSP00000038421	PDS5 cohesin associated factor B	Pds5b	pep chromosome:GRCm39:5:150597292:150734132:1 gene:ENSMUSG00000034021.16 transcript:ENSMUST00000038900.15 gene_biotype:protein_coding transcript_biotype:protein_coding gene_symbol:Pds5b description:PDS5 cohesin associated factor B [Source:MGI Symbol;Acc:MGI:2140945]	12	18	22	29	1449	164.7	8.54	0.738501	0.674351	1.09513	0.590338
ENSMUSP00000127330	RAB1A, member RAS oncogene family	Rab1a	pep chromosome:GRCm39:11:20151602:20176856:1 gene:ENSMUSG00000020149.18 transcript:ENSMUST00000163483.2 gene_biotype:protein_coding transcript_biotype:protein_coding gene_symbol:Rab1a description:RAB1A, member RAS oncogene family [Source:MGI Symbol;Acc:MGI:97842]	75	7	14	53	205	22.7	6.21	1.0994	1.18587	0.927083	0.554094
ENSMUSP00000021091	platelet-activating factor acetylhydrolase, isoform 1b, subunit 1	Pafah1b1	pep chromosome:GRCm39:11:74564775:74615496:-1 gene:ENSMUSG00000020745.16 transcript:ENSMUST00000021091.15 gene_biotype:protein_coding transcript_biotype:protein_coding gene_symbol:Pafah1b1 description:platelet-activating factor acetylhydrolase, isoform 1b, subunit 1 [Source:MGI Symbol;Acc:MGI:109520]	42	13	14	23	410	46.6	7.37	0.954599	0.958569	0.995857	0.938741
ENSMUSP00000048489	coronin 7	Coro7	pep chromosome:GRCm39:16:4443997:4497641:-1 gene:ENSMUSG00000039637.16 transcript:ENSMUST00000038552.13 gene_biotype:protein_coding transcript_biotype:protein_coding gene_symbol:Coro7 description:coronin 7 [Source:MGI Symbol;Acc:MGI:1926135]	25	19	19	28	922	100.7	5.77	0.959686	0.891412	1.07659	0.667652
ENSMUSP00000032992	eukaryotic translation initiation factor 3, subunit C	Eif3c	pep chromosome:GRCm39:7:126145627:126165583:-1 gene:ENSMUSG00000030738.12 transcript:ENSMUST00000032992.7 gene_biotype:protein_coding transcript_biotype:protein_coding gene_symbol:Eif3c description:eukaryotic translation initiation factor 3, subunit C [Source:MGI Symbol;Acc:MGI:1926966]	24	21	21	38	911	105.5	5.78	0.978425	1.02344	0.956016	0.710962
ENSMUSP00000007216	adaptor-related protein complex 2, mu 1 subunit	Ap2m1	pep chromosome:GRCm39:16:20354230:20363659:1 gene:ENSMUSG00000022841.16 transcript:ENSMUST00000007216.9 gene_biotype:protein_coding transcript_biotype:protein_coding gene_symbol:Ap2m1 description:adaptor-related protein complex 2, mu 1 subunit [Source:MGI Symbol;Acc:MGI:1298405]	40	17	17	37	435	49.6	9.54	0.975927	0.881104	1.10762	0.541373
ENSMUSP00000018992	arginyl-tRNA synthetase	Rars	pep chromosome:GRCm39:11:35699208:35725333:-1 gene:ENSMUSG00000018848.5 transcript:ENSMUST00000018992.4 gene_biotype:protein_coding transcript_biotype:protein_coding gene_symbol:Rars description:arginyl-tRNA synthetase [Source:MGI Symbol;Acc:MGI:1914297]	26	17	17	23	660	75.6	7.55	0.930119	0.92848	1.00177	0.972634
ENSMUSP00000136343	ATP-binding cassette, sub-family C (CFTR/MRP), member 3	Abcc3	pep chromosome:GRCm39:11:94234121:94283802:-1 gene:ENSMUSG00000020865.17 transcript:ENSMUST00000178136.8 gene_biotype:protein_coding transcript_biotype:protein_coding gene_symbol:Abcc3 description:ATP-binding cassette, sub-family C (CFTR/MRP), member 3 [Source:MGI Symbol;Acc:MGI:1923658]	12	14	17	28	1523	169.1	7.14	1.10664	1.08243	1.02236	0.920765
ENSMUSP00000026425	proliferation-associated 2G4	Pa2g4	pep chromosome:GRCm39:10:128393635:128401803:-1 gene:ENSMUSG00000025364.14 transcript:ENSMUST00000026425.13 gene_biotype:protein_coding transcript_biotype:protein_coding gene_symbol:Pa2g4 description:proliferation-associated 2G4 [Source:MGI Symbol;Acc:MGI:894684]	34	12	12	31	394	43.7	6.86	0.882052	0.824262	1.07011	0.695915
ENSMUSP00000041299	ubiquitin specific peptidase 5 (isopeptidase T)	Usp5	pep chromosome:GRCm39:6:124791982:124806447:-1 gene:ENSMUSG00000038429.11 transcript:ENSMUST00000047510.10 gene_biotype:protein_coding transcript_biotype:protein_coding gene_symbol:Usp5 description:ubiquitin specific peptidase 5 (isopeptidase T) [Source:MGI Symbol;Acc:MGI:1347343]	20	16	16	27	858	95.8	5.01	0.958906	0.970522	0.988031	0.893712
ENSMUSP00000036162	phosphatidylinositol 4-kinase alpha	Pi4ka	pep chromosome:GRCm39:16:17098215:17224178:-1 gene:ENSMUSG00000041720.15 transcript:ENSMUST00000036161.12 gene_biotype:protein_coding transcript_biotype:protein_coding gene_symbol:Pi4ka description:phosphatidylinositol 4-kinase alpha [Source:MGI Symbol;Acc:MGI:2448506]	10	21	21	25	2044	231.2	6.87	0.869269	0.819814	1.06032	0.73974
ENSMUSP00000076989	heterogeneous nuclear ribonucleoprotein H1	Hnrnph1	pep chromosome:GRCm39:11:50268596:50277355:1 gene:ENSMUSG00000007850.17 transcript:ENSMUST00000077817.8 gene_biotype:protein_coding transcript_biotype:protein_coding gene_symbol:Hnrnph1 description:heterogeneous nuclear ribonucleoprotein H1 [Source:MGI Symbol;Acc:MGI:1891925]	35	5	11	21	472	51.2	6.8	0.981944	0.943398	1.04086	0.830603
ENSMUSP00000099933	exportin 1	Xpo1	pep chromosome:GRCm39:11:23206078:23248249:1 gene:ENSMUSG00000020290.15 transcript:ENSMUST00000102869.8 gene_biotype:protein_coding transcript_biotype:protein_coding gene_symbol:Xpo1 description:exportin 1 [Source:MGI Symbol;Acc:MGI:2144013]	18	18	18	28	1071	123	6.07	0.965215	1.18999	0.811112	0.120431
ENSMUSP00000109237	coatomer protein complex, subunit gamma 1	Copg1	pep chromosome:GRCm39:6:87864796:87890577:1 gene:ENSMUSG00000030058.18 transcript:ENSMUST00000113607.10 gene_biotype:protein_coding transcript_biotype:protein_coding gene_symbol:Copg1 description:coatomer protein complex, subunit gamma 1 [Source:MGI Symbol;Acc:MGI:1858696]	23	17	19	25	874	97.5	5.35	1.00259	1.03932	0.964657	0.759727
ENSMUSP00000099681	syntaxin binding protein 3	Stxbp3	pep chromosome:GRCm39:3:108700492:108747827:-1 gene:ENSMUSG00000027882.19 transcript:ENSMUST00000102621.11 gene_biotype:protein_coding transcript_biotype:protein_coding gene_symbol:Stxbp3 description:syntaxin binding protein 3 [Source:MGI Symbol;Acc:MGI:107362]	24	15	16	26	592	67.9	8.02	1.23656	1.02203	1.20991	0.240168
ENSMUSP00000009036	voltage-dependent anion channel 3	Vdac3	pep chromosome:GRCm39:8:23067102:23083774:-1 gene:ENSMUSG00000008892.13 transcript:ENSMUST00000009036.11 gene_biotype:protein_coding transcript_biotype:protein_coding gene_symbol:Vdac3 description:voltage-dependent anion channel 3 [Source:MGI Symbol;Acc:MGI:106922]	54	11	12	34	283	30.7	8.79	1.42276	1.36724	1.04061	0.831788
ENSMUSP00000020886	nicotinamide phosphoribosyltransferase	Nampt	pep chromosome:GRCm39:12:32870334:32903348:1 gene:ENSMUSG00000020572.9 transcript:ENSMUST00000020886.9 gene_biotype:protein_coding transcript_biotype:protein_coding gene_symbol:Nampt description:nicotinamide phosphoribosyltransferase [Source:MGI Symbol;Acc:MGI:1929865]	42	21	21	38	491	55.4	7.15	1.0063	0.983592	1.02309	0.917176
ENSMUSP00000025851	dipeptidylpeptidase 3	Dpp3	pep chromosome:GRCm39:19:4957257:4978315:-1 gene:ENSMUSG00000063904.5 transcript:ENSMUST00000025851.4 gene_biotype:protein_coding transcript_biotype:protein_coding gene_symbol:Dpp3 description:dipeptidylpeptidase 3 [Source:MGI Symbol;Acc:MGI:1922471]	27	18	18	32	738	82.8	5.38	0.936562	0.881951	1.06192	0.732506
ENSMUSP00000137305	golgi autoantigen, golgin subfamily a, 5	Golga5	pep chromosome:GRCm39:12:102435394:102464164:1 gene:ENSMUSG00000021192.17 transcript:ENSMUST00000179218.9 gene_biotype:protein_coding transcript_biotype:protein_coding gene_symbol:Golga5 description:golgi autoantigen, golgin subfamily a, 5 [Source:MGI Symbol;Acc:MGI:1351475]	21	16	16	21	729	82.3	6.23	1.07059	0.990391	1.08097	0.648882
ENSMUSP00000033673	non-POU-domain-containing, octamer binding protein	Nono	pep chromosome:GRCm39:X:100473161:100492197:1 gene:ENSMUSG00000031311.18 transcript:ENSMUST00000033673.7 gene_biotype:protein_coding transcript_biotype:protein_coding gene_symbol:Nono description:non-POU-domain-containing, octamer binding protein [Source:MGI Symbol;Acc:MGI:1855692]	25	11	13	46	473	54.5	8.95	1.06807	0.97589	1.09446	0.593037
ENSMUSP00000148115	nucleoporin 98	Nup98	pep chromosome:GRCm39:7:101768605:101859383:-1 gene:ENSMUSG00000063550.9 transcript:ENSMUST00000210682.2 gene_biotype:protein_coding transcript_biotype:protein_coding gene_symbol:Nup98 description:nucleoporin 98 [Source:MGI Symbol;Acc:MGI:109404]	12	18	18	23	1816	197.2	6.15	0.909275	0.872035	1.0427	0.821797
ENSMUSP00000101241	guanine nucleotide binding protein (G protein), beta 1	Gnb1	pep chromosome:GRCm39:4:155575821:155643726:1 gene:ENSMUSG00000029064.16 transcript:ENSMUST00000105616.10 gene_biotype:protein_coding transcript_biotype:protein_coding gene_symbol:Gnb1 description:guanine nucleotide binding protein (G protein), beta 1 [Source:MGI Symbol;Acc:MGI:95781]	44	6	12	42	340	37.4	6	1.10176	1.20361	0.915378	0.494585
ENSMUSP00000108528	acyl-CoA synthetase long-chain family member 4	Acsl4	pep chromosome:GRCm39:X:141100989:141173340:-1 gene:ENSMUSG00000031278.13 transcript:ENSMUST00000112907.8 gene_biotype:protein_coding transcript_biotype:protein_coding gene_symbol:Acsl4 description:acyl-CoA synthetase long-chain family member 4 [Source:MGI Symbol;Acc:MGI:1354713]	24	16	17	21	711	79	8.28	1.04946	1.06477	0.985617	0.879814
ENSMUSP00000147409	SUMO1 activating enzyme subunit 1	Sae1	pep chromosome:GRCm39:7:16054667:16121731:-1 gene:ENSMUSG00000052833.10 transcript:ENSMUST00000210999.2 gene_biotype:protein_coding transcript_biotype:protein_coding gene_symbol:Sae1 description:SUMO1 activating enzyme subunit 1 [Source:MGI Symbol;Acc:MGI:1929264]	38	14	14	23	350	38.6	5.36	0.979178	1.02143	0.958634	0.72567
ENSMUSP00000044502	EF hand domain containing 2	Efhd2	pep chromosome:GRCm39:4:141585453:141602231:-1 gene:ENSMUSG00000040659.4 transcript:ENSMUST00000036854.4 gene_biotype:protein_coding transcript_biotype:protein_coding gene_symbol:Efhd2 description:EF hand domain containing 2 [Source:MGI Symbol;Acc:MGI:106504]	52	13	13	40	240	26.8	5.14	1.10302	1.07344	1.02755	0.895136
ENSMUSP00000121835	SMC hinge domain containing 1	Smchd1	pep chromosome:GRCm39:17:71651484:71782338:-1 gene:ENSMUSG00000024054.15 transcript:ENSMUST00000127430.2 gene_biotype:protein_coding transcript_biotype:protein_coding gene_symbol:Smchd1 description:SMC hinge domain containing 1 [Source:MGI Symbol;Acc:MGI:1921605]	12	23	23	24	2007	225.5	7.24	0.937842	1.02709	0.913109	0.483372
ENSMUSP00000000287	serine carboxypeptidase 1	Scpep1	pep chromosome:GRCm39:11:88814846:88846291:-1 gene:ENSMUSG00000000278.11 transcript:ENSMUST00000000287.9 gene_biotype:protein_coding transcript_biotype:protein_coding gene_symbol:Scpep1 description:serine carboxypeptidase 1 [Source:MGI Symbol;Acc:MGI:1921867]	27	12	12	54	452	50.9	5.66	1.55913	1.18251	1.31849	0.0848564
ENSMUSP00000124551	eukaryotic translation initiation factor 4, gamma 2	Eif4g2	pep chromosome:GRCm39:7:110666957:110682237:-1 gene:ENSMUSG00000005610.18 transcript:ENSMUST00000162415.9 gene_biotype:protein_coding transcript_biotype:protein_coding gene_symbol:Eif4g2 description:eukaryotic translation initiation factor 4, gamma 2 [Source:MGI Symbol;Acc:MGI:109207]	19	17	17	24	906	102	7.14	1.02371	0.977406	1.04738	0.799669
ENSMUSP00000004202	DNA methyltransferase (cytosine-5) 1	Dnmt1	pep chromosome:GRCm39:9:20818505:20864275:-1 gene:ENSMUSG00000004099.17 transcript:ENSMUST00000004202.17 gene_biotype:protein_coding transcript_biotype:protein_coding gene_symbol:Dnmt1 description:DNA methyltransferase (cytosine-5) 1 [Source:MGI Symbol;Acc:MGI:94912]	12	20	20	24	1620	183.1	7.74	0.941726	1.15505	0.81531	0.129563
ENSMUSP00000034947	peptidylprolyl isomerase B	Ppib	pep chromosome:GRCm39:9:65967513:65973905:1 gene:ENSMUSG00000032383.8 transcript:ENSMUST00000034947.7 gene_biotype:protein_coding transcript_biotype:protein_coding gene_symbol:Ppib description:peptidylprolyl isomerase B [Source:MGI Symbol;Acc:MGI:97750]	57	12	12	40	216	23.7	9.55	1.16989	1.18576	0.986623	0.885606
ENSMUSP00000061227	phosphoglucomutase 1	Pgm1	pep chromosome:GRCm39:4:99786611:99844491:1 gene:ENSMUSG00000025791.19 transcript:ENSMUST00000058351.16 gene_biotype:protein_coding transcript_biotype:protein_coding gene_symbol:Pgm1 description:phosphoglucomutase 1 [Source:MGI Symbol;Acc:MGI:97565]	36	17	17	22	562	61.4	6.57	0.970259	1.01915	0.952027	0.688686
ENSMUSP00000092157	Sec31 homolog A (S. cerevisiae)	Sec31a	pep chromosome:GRCm39:5:100509508:100564093:-1 gene:ENSMUSG00000035325.17 transcript:ENSMUST00000094578.11 gene_biotype:protein_coding transcript_biotype:protein_coding gene_symbol:Sec31a description:Sec31 homolog A (S. cerevisiae) [Source:MGI Symbol;Acc:MGI:1916412]	16	20	20	30	1230	133.5	6.76	1.01043	1.05485	0.957891	0.721488
ENSMUSP00000033671	ribosomal protein S6 kinase polypeptide 3	Rps6ka3	pep chromosome:GRCm39:X:158038854:158151240:1 gene:ENSMUSG00000031309.16 transcript:ENSMUST00000033671.13 gene_biotype:protein_coding transcript_biotype:protein_coding gene_symbol:Rps6ka3 description:ribosomal protein S6 kinase polypeptide 3 [Source:MGI Symbol;Acc:MGI:104557]	26	9	19	30	740	83.6	6.89	1.03564	1.08617	0.953479	0.696772
[truncated: 4,989 more rows]

## Sheet: C_vs_A
Accession	Protein Name	Gene Name	Description	Coverage	Unique Peptides	Peptides	PSMs	AAs	MW [kDa]	calc. pI	C	A	C/A	Significance A
[truncated: 6,010 more rows]

## Sheet: C_vs_B
Accession	Protein Name	Gene Name	Description	Coverage	Unique Peptides	Peptides	PSMs	AAs	MW [kDa]	calc. pI	C	B	C/B	Significance A
[truncated: 6,010 more rows]
