# Supplementary material for: Transcriptomics and quantitative proteomics reveal changes after second stimulation of bone marrow-derived macrophages from lupus-prone MRL/lpr mice
Source: Front Immunol. 2022 Oct 19;13:1004232. doi: 10.3389/fimmu.2022.1004232 (PMC9627492; doi:10.3389/fimmu.2022.1004232)
Supplement: Supplementary file 13 [file Table_13.xlsx]

## Sheet: B_VS_A_BP
Level	GO_ID	Term	Type	Seqs_Num	Sequences
1	GO:0008150	biological_process	Biological Process	518	ENSMUSP00000023217,ENSMUSP00000001485,ENSMUSP00000069004,ENSMUSP00000026173,ENSMUSP00000045201,ENSMUSP00000147061,ENSMUSP00000033282,ENSMUSP00000025263,ENSMUSP00000059192,ENSMUSP00000000505,ENSMUSP00000116252,ENSMUSP00000112600,ENSMUSP00000055714,ENSMUSP00000116259,ENSMUSP00000003759,ENSMUSP00000046732,ENSMUSP00000035179,ENSMUSP00000018985,ENSMUSP00000078429,ENSMUSP00000050374,ENSMUSP00000071715,…
2	GO:0000003	reproduction	Biological Process	32	ENSMUSP00000087119,ENSMUSP00000085423,ENSMUSP00000069850,ENSMUSP00000004910,ENSMUSP00000070868,ENSMUSP00000086459,ENSMUSP00000089051,ENSMUSP00000151886,ENSMUSP00000023832,ENSMUSP00000094211,ENSMUSP00000034746,ENSMUSP00000051492,ENSMUSP00000127646,ENSMUSP00000091692,ENSMUSP00000023809,ENSMUSP00000034026,ENSMUSP00000035065,ENSMUSP00000032228,ENSMUSP00000027053,ENSMUSP00000023583,ENSMUSP00000026262,…
2	GO:0008152	metabolic process	Biological Process	323	ENSMUSP00000026173,ENSMUSP00000045201,ENSMUSP00000147061,ENSMUSP00000059192,ENSMUSP00000000505,ENSMUSP00000116252,ENSMUSP00000112600,ENSMUSP00000050374,ENSMUSP00000033282,ENSMUSP00000080974,ENSMUSP00000053916,ENSMUSP00000015981,ENSMUSP00000025263,ENSMUSP00000055714,ENSMUSP00000064680,ENSMUSP00000137253,ENSMUSP00000028881,ENSMUSP00000089948,ENSMUSP00000035644,ENSMUSP00000077971,ENSMUSP00000047333,…
2	GO:0001906	cell killing	Biological Process	7	ENSMUSP00000022830,ENSMUSP00000015596,ENSMUSP00000099534,ENSMUSP00000131297,ENSMUSP00000032260,ENSMUSP00000018610,ENSMUSP00000031327
2	GO:0002376	immune system process	Biological Process	105	ENSMUSP00000027015,ENSMUSP00000126067,ENSMUSP00000122787,ENSMUSP00000103056,ENSMUSP00000023790,ENSMUSP00000022830,ENSMUSP00000015596,ENSMUSP00000099534,ENSMUSP00000131297,ENSMUSP00000019997,ENSMUSP00000006625,ENSMUSP00000080974,ENSMUSP00000039600,ENSMUSP00000054637,ENSMUSP00000067002,ENSMUSP00000148145,ENSMUSP00000095171,ENSMUSP00000088291,ENSMUSP00000069851,ENSMUSP00000083587,ENSMUSP00000032239,…
2	GO:0040007	growth	Biological Process	33	ENSMUSP00000036245,ENSMUSP00000109884,ENSMUSP00000079699,ENSMUSP00000087119,ENSMUSP00000050374,ENSMUSP00000062277,ENSMUSP00000019064,ENSMUSP00000099907,ENSMUSP00000139147,ENSMUSP00000064536,ENSMUSP00000023583,ENSMUSP00000039604,ENSMUSP00000052465,ENSMUSP00000080974,ENSMUSP00000015981,ENSMUSP00000025263,ENSMUSP00000117834,ENSMUSP00000082777,ENSMUSP00000085423,ENSMUSP00000092041,ENSMUSP00000069965,…
2	GO:0007610	behavior	Biological Process	20	ENSMUSP00000044050,ENSMUSP00000096152,ENSMUSP00000015596,ENSMUSP00000035065,ENSMUSP00000022429,ENSMUSP00000059977,ENSMUSP00000027015,ENSMUSP00000028881,ENSMUSP00000069850,ENSMUSP00000000769,ENSMUSP00000133302,ENSMUSP00000034713,ENSMUSP00000026262,ENSMUSP00000126067,ENSMUSP00000022176,ENSMUSP00000020278,ENSMUSP00000022345,ENSMUSP00000080974,ENSMUSP00000085423,ENSMUSP00000064536
2	GO:0008283	cell proliferation	Biological Process	74	ENSMUSP00000087119,ENSMUSP00000133302,ENSMUSP00000025263,ENSMUSP00000064536,ENSMUSP00000007799,ENSMUSP00000000049,ENSMUSP00000015596,ENSMUSP00000022124,ENSMUSP00000043088,ENSMUSP00000054499,ENSMUSP00000025523,ENSMUSP00000035065,ENSMUSP00000055637,ENSMUSP00000091692,ENSMUSP00000070868,ENSMUSP00000028881,ENSMUSP00000022176,ENSMUSP00000030622,ENSMUSP00000035179,ENSMUSP00000044050,ENSMUSP00000133279,…
2	GO:0009987	cellular process	Biological Process	440	ENSMUSP00000023217,ENSMUSP00000069004,ENSMUSP00000026173,ENSMUSP00000045201,ENSMUSP00000147061,ENSMUSP00000059192,ENSMUSP00000000505,ENSMUSP00000116252,ENSMUSP00000112600,ENSMUSP00000055714,ENSMUSP00000116259,ENSMUSP00000003759,ENSMUSP00000046732,ENSMUSP00000035179,ENSMUSP00000018985,ENSMUSP00000078429,ENSMUSP00000050374,ENSMUSP00000033282,ENSMUSP00000071715,ENSMUSP00000094225,ENSMUSP00000061305,…
2	GO:0022414	reproductive process	Biological Process	32	ENSMUSP00000087119,ENSMUSP00000085423,ENSMUSP00000069850,ENSMUSP00000004910,ENSMUSP00000070868,ENSMUSP00000086459,ENSMUSP00000089051,ENSMUSP00000151886,ENSMUSP00000023832,ENSMUSP00000094211,ENSMUSP00000034746,ENSMUSP00000051492,ENSMUSP00000127646,ENSMUSP00000091692,ENSMUSP00000023809,ENSMUSP00000034026,ENSMUSP00000035065,ENSMUSP00000032228,ENSMUSP00000027053,ENSMUSP00000023583,ENSMUSP00000026262,…
2	GO:0022610	biological adhesion	Biological Process	41	ENSMUSP00000074340,ENSMUSP00000139147,ENSMUSP00000080974,ENSMUSP00000054499,ENSMUSP00000046199,ENSMUSP00000033053,ENSMUSP00000031840,ENSMUSP00000083587,ENSMUSP00000091692,ENSMUSP00000065719,ENSMUSP00000145451,ENSMUSP00000044050,ENSMUSP00000036304,ENSMUSP00000039600,ENSMUSP00000141648,ENSMUSP00000122787,ENSMUSP00000015596,ENSMUSP00000109884,ENSMUSP00000106087,ENSMUSP00000016640,ENSMUSP00000007799,…
2	GO:0023052	signaling	Biological Process	161	ENSMUSP00000025263,ENSMUSP00000028881,ENSMUSP00000039600,ENSMUSP00000069851,ENSMUSP00000001008,ENSMUSP00000086459,ENSMUSP00000051492,ENSMUSP00000040307,ENSMUSP00000095171,ENSMUSP00000071715,ENSMUSP00000007799,ENSMUSP00000050374,ENSMUSP00000126067,ENSMUSP00000080974,ENSMUSP00000046199,ENSMUSP00000031840,ENSMUSP00000058629,ENSMUSP00000064536,ENSMUSP00000053394,ENSMUSP00000085293,ENSMUSP00000023788,…
2	GO:0032501	multicellular organismal process	Biological Process	190	ENSMUSP00000026262,ENSMUSP00000026972,ENSMUSP00000102213,ENSMUSP00000028071,ENSMUSP00000087119,ENSMUSP00000020970,ENSMUSP00000023583,ENSMUSP00000004949,ENSMUSP00000054499,ENSMUSP00000109794,ENSMUSP00000035065,ENSMUSP00000139147,ENSMUSP00000085566,ENSMUSP00000007799,ENSMUSP00000085423,ENSMUSP00000069850,ENSMUSP00000004910,ENSMUSP00000070868,ENSMUSP00000082777,ENSMUSP00000065719,ENSMUSP00000064680,…
2	GO:0032502	developmental process	Biological Process	177	ENSMUSP00000026262,ENSMUSP00000026972,ENSMUSP00000102213,ENSMUSP00000028071,ENSMUSP00000054499,ENSMUSP00000109794,ENSMUSP00000035065,ENSMUSP00000087119,ENSMUSP00000139147,ENSMUSP00000085566,ENSMUSP00000007799,ENSMUSP00000085423,ENSMUSP00000069850,ENSMUSP00000004910,ENSMUSP00000070868,ENSMUSP00000082777,ENSMUSP00000065719,ENSMUSP00000064680,ENSMUSP00000083810,ENSMUSP00000031840,ENSMUSP00000064536,…
2	GO:0040011	locomotion	Biological Process	53	ENSMUSP00000109794,ENSMUSP00000064536,ENSMUSP00000039600,ENSMUSP00000019266,ENSMUSP00000001008,ENSMUSP00000083587,ENSMUSP00000120466,ENSMUSP00000031327,ENSMUSP00000019064,ENSMUSP00000074885,ENSMUSP00000025523,ENSMUSP00000054499,ENSMUSP00000000769,ENSMUSP00000000049,ENSMUSP00000015596,ENSMUSP00000099907,ENSMUSP00000028233,ENSMUSP00000101312,ENSMUSP00000017153,ENSMUSP00000087119,ENSMUSP00000022429,…
2	GO:0043473	pigmentation	Biological Process	2	ENSMUSP00000036614,ENSMUSP00000097754
2	GO:0048511	rhythmic process	Biological Process	7	ENSMUSP00000070868,ENSMUSP00000018610,ENSMUSP00000032194,ENSMUSP00000051492,ENSMUSP00000083474,ENSMUSP00000000769,ENSMUSP00000027015
2	GO:0048518	positive regulation of biological process	Biological Process	169	ENSMUSP00000025263,ENSMUSP00000040307,ENSMUSP00000086459,ENSMUSP00000095171,ENSMUSP00000028881,ENSMUSP00000071715,ENSMUSP00000023790,ENSMUSP00000099534,ENSMUSP00000131297,ENSMUSP00000126067,ENSMUSP00000031840,ENSMUSP00000025523,ENSMUSP00000015981,ENSMUSP00000122787,ENSMUSP00000027639,ENSMUSP00000058629,ENSMUSP00000029711,ENSMUSP00000015596,ENSMUSP00000007799,ENSMUSP00000080974,ENSMUSP00000032888,…
2	GO:0048519	negative regulation of biological process	Biological Process	158	ENSMUSP00000080974,ENSMUSP00000053916,ENSMUSP00000015981,ENSMUSP00000025263,ENSMUSP00000055714,ENSMUSP00000064680,ENSMUSP00000137253,ENSMUSP00000028881,ENSMUSP00000089948,ENSMUSP00000035644,ENSMUSP00000077971,ENSMUSP00000047333,ENSMUSP00000119057,ENSMUSP00000033570,ENSMUSP00000028071,ENSMUSP00000112675,ENSMUSP00000007799,ENSMUSP00000069850,ENSMUSP00000032194,ENSMUSP00000103056,ENSMUSP00000088291,…
2	GO:0050789	regulation of biological process	Biological Process	295	ENSMUSP00000050374,ENSMUSP00000033282,ENSMUSP00000080974,ENSMUSP00000053916,ENSMUSP00000015981,ENSMUSP00000025263,ENSMUSP00000055714,ENSMUSP00000064680,ENSMUSP00000137253,ENSMUSP00000028881,ENSMUSP00000089948,ENSMUSP00000035644,ENSMUSP00000077971,ENSMUSP00000047333,ENSMUSP00000119057,ENSMUSP00000033570,ENSMUSP00000028071,ENSMUSP00000112675,ENSMUSP00000007799,ENSMUSP00000069850,ENSMUSP00000032194,…
2	GO:0050896	response to stimulus	Biological Process	262	ENSMUSP00000025263,ENSMUSP00000028881,ENSMUSP00000039600,ENSMUSP00000069851,ENSMUSP00000001008,ENSMUSP00000086459,ENSMUSP00000051492,ENSMUSP00000040307,ENSMUSP00000095171,ENSMUSP00000071715,ENSMUSP00000007799,ENSMUSP00000062576,ENSMUSP00000020931,ENSMUSP00000018985,ENSMUSP00000122787,ENSMUSP00000028882,ENSMUSP00000044050,ENSMUSP00000027015,ENSMUSP00000087119,ENSMUSP00000018610,ENSMUSP00000015596,…
2	GO:0051179	localization	Biological Process	184	ENSMUSP00000033282,ENSMUSP00000069004,ENSMUSP00000025263,ENSMUSP00000127990,ENSMUSP00000037000,ENSMUSP00000137310,ENSMUSP00000109794,ENSMUSP00000064536,ENSMUSP00000126067,ENSMUSP00000041503,ENSMUSP00000032888,ENSMUSP00000056715,ENSMUSP00000039600,ENSMUSP00000019266,ENSMUSP00000001008,ENSMUSP00000089051,ENSMUSP00000083587,ENSMUSP00000095171,ENSMUSP00000022576,ENSMUSP00000022787,ENSMUSP00000037023,…
2	GO:0051704	multi-organism process	Biological Process	83	ENSMUSP00000070868,ENSMUSP00000122787,ENSMUSP00000039600,ENSMUSP00000054637,ENSMUSP00000056669,ENSMUSP00000019997,ENSMUSP00000099534,ENSMUSP00000031327,ENSMUSP00000074885,ENSMUSP00000022722,ENSMUSP00000046199,ENSMUSP00000025263,ENSMUSP00000018610,ENSMUSP00000082548,ENSMUSP00000032239,ENSMUSP00000069850,ENSMUSP00000023611,ENSMUSP00000099888,ENSMUSP00000028259,ENSMUSP00000099890,ENSMUSP00000020970,…
2	GO:0065007	biological regulation	Biological Process	318	ENSMUSP00000050374,ENSMUSP00000033282,ENSMUSP00000080974,ENSMUSP00000053916,ENSMUSP00000015981,ENSMUSP00000025263,ENSMUSP00000055714,ENSMUSP00000064680,ENSMUSP00000137253,ENSMUSP00000028881,ENSMUSP00000089948,ENSMUSP00000035644,ENSMUSP00000077971,ENSMUSP00000047333,ENSMUSP00000119057,ENSMUSP00000033570,ENSMUSP00000028071,ENSMUSP00000112675,ENSMUSP00000007799,ENSMUSP00000069850,ENSMUSP00000032194,…
2	GO:0071840	cellular component organization or biogenesis	Biological Process	196	ENSMUSP00000023217,ENSMUSP00000001485,ENSMUSP00000069004,ENSMUSP00000026173,ENSMUSP00000045201,ENSMUSP00000147061,ENSMUSP00000033282,ENSMUSP00000035179,ENSMUSP00000018985,ENSMUSP00000127990,ENSMUSP00000037000,ENSMUSP00000022203,ENSMUSP00000000776,ENSMUSP00000035644,ENSMUSP00000116259,ENSMUSP00000039604,ENSMUSP00000086987,ENSMUSP00000015981,ENSMUSP00000112977,ENSMUSP00000020931,ENSMUSP00000036245,…
2	GO:0098754	detoxification	Biological Process	10	ENSMUSP00000034214,ENSMUSP00000133302,ENSMUSP00000035065,ENSMUSP00000090897,ENSMUSP00000059977,ENSMUSP00000071130,ENSMUSP00000025263,ENSMUSP00000023832,ENSMUSP00000080974,ENSMUSP00000087405
3	GO:0019953	sexual reproduction	Biological Process	13	ENSMUSP00000070868,ENSMUSP00000085423,ENSMUSP00000151886,ENSMUSP00000023832,ENSMUSP00000094211,ENSMUSP00000034746,ENSMUSP00000051492,ENSMUSP00000127646,ENSMUSP00000091692,ENSMUSP00000035065,ENSMUSP00000028881,ENSMUSP00000034026,ENSMUSP00000026262
3	GO:0032504	multicellular organism reproduction	Biological Process	13	ENSMUSP00000070868,ENSMUSP00000085423,ENSMUSP00000151886,ENSMUSP00000023832,ENSMUSP00000094211,ENSMUSP00000034746,ENSMUSP00000051492,ENSMUSP00000091692,ENSMUSP00000035065,ENSMUSP00000028881,ENSMUSP00000034026,ENSMUSP00000000769,ENSMUSP00000064680
3	GO:0055114	oxidation-reduction process	Biological Process	43	ENSMUSP00000083474,ENSMUSP00000050788,ENSMUSP00000026617,ENSMUSP00000000175,ENSMUSP00000054856,ENSMUSP00000115419,ENSMUSP00000080993,ENSMUSP00000146960,ENSMUSP00000141022,ENSMUSP00000033582,ENSMUSP00000041380,ENSMUSP00000080974,ENSMUSP00000024706,ENSMUSP00000126067,ENSMUSP00000066303,ENSMUSP00000025476,ENSMUSP00000004968,ENSMUSP00000035065,ENSMUSP00000046497,ENSMUSP00000059977,ENSMUSP00000018610,…
3	GO:0006807	nitrogen compound metabolic process	Biological Process	273	ENSMUSP00000059192,ENSMUSP00000000505,ENSMUSP00000116252,ENSMUSP00000112600,ENSMUSP00000050374,ENSMUSP00000033282,ENSMUSP00000080974,ENSMUSP00000053916,ENSMUSP00000015981,ENSMUSP00000025263,ENSMUSP00000055714,ENSMUSP00000064680,ENSMUSP00000137253,ENSMUSP00000028881,ENSMUSP00000089948,ENSMUSP00000035644,ENSMUSP00000077971,ENSMUSP00000047333,ENSMUSP00000119057,ENSMUSP00000033570,ENSMUSP00000028071,…
3	GO:0009056	catabolic process	Biological Process	68	ENSMUSP00000026173,ENSMUSP00000045201,ENSMUSP00000147061,ENSMUSP00000129789,ENSMUSP00000020801,ENSMUSP00000017384,ENSMUSP00000082548,ENSMUSP00000015981,ENSMUSP00000005173,ENSMUSP00000047333,ENSMUSP00000035179,ENSMUSP00000062277,ENSMUSP00000032198,ENSMUSP00000133175,ENSMUSP00000047202,ENSMUSP00000094225,ENSMUSP00000061305,ENSMUSP00000018610,ENSMUSP00000121736,ENSMUSP00000026262,ENSMUSP00000133302,…
3	GO:0009058	biosynthetic process	Biological Process	167	ENSMUSP00000059192,ENSMUSP00000000505,ENSMUSP00000116252,ENSMUSP00000112600,ENSMUSP00000080974,ENSMUSP00000053916,ENSMUSP00000015981,ENSMUSP00000025263,ENSMUSP00000055714,ENSMUSP00000064680,ENSMUSP00000137253,ENSMUSP00000028881,ENSMUSP00000089948,ENSMUSP00000035644,ENSMUSP00000077971,ENSMUSP00000047333,ENSMUSP00000119057,ENSMUSP00000033570,ENSMUSP00000028071,ENSMUSP00000112675,ENSMUSP00000007799,…
3	GO:0009892	negative regulation of metabolic process	Biological Process	84	ENSMUSP00000080974,ENSMUSP00000053916,ENSMUSP00000015981,ENSMUSP00000025263,ENSMUSP00000055714,ENSMUSP00000064680,ENSMUSP00000137253,ENSMUSP00000028881,ENSMUSP00000089948,ENSMUSP00000035644,ENSMUSP00000077971,ENSMUSP00000047333,ENSMUSP00000119057,ENSMUSP00000033570,ENSMUSP00000028071,ENSMUSP00000112675,ENSMUSP00000007799,ENSMUSP00000069850,ENSMUSP00000032194,ENSMUSP00000103056,ENSMUSP00000088291,…
3	GO:0009893	positive regulation of metabolic process	Biological Process	97	ENSMUSP00000025263,ENSMUSP00000040307,ENSMUSP00000086459,ENSMUSP00000095171,ENSMUSP00000028881,ENSMUSP00000071715,ENSMUSP00000126067,ENSMUSP00000031840,ENSMUSP00000025523,ENSMUSP00000015981,ENSMUSP00000122787,ENSMUSP00000027639,ENSMUSP00000058629,ENSMUSP00000029711,ENSMUSP00000015596,ENSMUSP00000027015,ENSMUSP00000039604,ENSMUSP00000080717,ENSMUSP00000004949,ENSMUSP00000033264,ENSMUSP00000087736,…
3	GO:0019222	regulation of metabolic process	Biological Process	172	ENSMUSP00000050374,ENSMUSP00000033282,ENSMUSP00000080974,ENSMUSP00000053916,ENSMUSP00000015981,ENSMUSP00000025263,ENSMUSP00000055714,ENSMUSP00000064680,ENSMUSP00000137253,ENSMUSP00000028881,ENSMUSP00000089948,ENSMUSP00000035644,ENSMUSP00000077971,ENSMUSP00000047333,ENSMUSP00000119057,ENSMUSP00000033570,ENSMUSP00000028071,ENSMUSP00000112675,ENSMUSP00000007799,ENSMUSP00000069850,ENSMUSP00000032194,…
3	GO:0032259	methylation	Biological Process	8	ENSMUSP00000119057,ENSMUSP00000028071,ENSMUSP00000024887,ENSMUSP00000133279,ENSMUSP00000022203,ENSMUSP00000089948,ENSMUSP00000025444,ENSMUSP00000119330
3	GO:0032963	collagen metabolic process	Biological Process	4	ENSMUSP00000087119,ENSMUSP00000139147,ENSMUSP00000015596,ENSMUSP00000004968
3	GO:0042445	hormone metabolic process	Biological Process	5	ENSMUSP00000027053,ENSMUSP00000027989,ENSMUSP00000025263,ENSMUSP00000028881,ENSMUSP00000092041
3	GO:0044237	cellular metabolic process	Biological Process	296	ENSMUSP00000026173,ENSMUSP00000045201,ENSMUSP00000147061,ENSMUSP00000059192,ENSMUSP00000000505,ENSMUSP00000116252,ENSMUSP00000112600,ENSMUSP00000050374,ENSMUSP00000033282,ENSMUSP00000080974,ENSMUSP00000053916,ENSMUSP00000015981,ENSMUSP00000025263,ENSMUSP00000055714,ENSMUSP00000064680,ENSMUSP00000137253,ENSMUSP00000028881,ENSMUSP00000089948,ENSMUSP00000035644,ENSMUSP00000077971,ENSMUSP00000047333,…
3	GO:0044238	primary metabolic process	Biological Process	297	ENSMUSP00000059192,ENSMUSP00000000505,ENSMUSP00000116252,ENSMUSP00000112600,ENSMUSP00000050374,ENSMUSP00000033282,ENSMUSP00000080974,ENSMUSP00000053916,ENSMUSP00000015981,ENSMUSP00000025263,ENSMUSP00000055714,ENSMUSP00000064680,ENSMUSP00000137253,ENSMUSP00000028881,ENSMUSP00000089948,ENSMUSP00000035644,ENSMUSP00000077971,ENSMUSP00000047333,ENSMUSP00000119057,ENSMUSP00000033570,ENSMUSP00000028071,…
3	GO:0044281	small molecule metabolic process	Biological Process	65	ENSMUSP00000035065,ENSMUSP00000095171,ENSMUSP00000059977,ENSMUSP00000099916,ENSMUSP00000080974,ENSMUSP00000025500,ENSMUSP00000027053,ENSMUSP00000025263,ENSMUSP00000154853,ENSMUSP00000031103,ENSMUSP00000041175,ENSMUSP00000132180,ENSMUSP00000026211,ENSMUSP00000000175,ENSMUSP00000104957,ENSMUSP00000047333,ENSMUSP00000080993,ENSMUSP00000054856,ENSMUSP00000115419,ENSMUSP00000031542,ENSMUSP00000132590,…
3	GO:0045730	respiratory burst	Biological Process	2	ENSMUSP00000037028,ENSMUSP00000000049
3	GO:0070085	glycosylation	Biological Process	6	ENSMUSP00000034458,ENSMUSP00000154853,ENSMUSP00000036240,ENSMUSP00000033643,ENSMUSP00000004968,ENSMUSP00000138885
3	GO:0070988	demethylation	Biological Process	1	ENSMUSP00000133279
3	GO:0071704	organic substance metabolic process	Biological Process	304	ENSMUSP00000059192,ENSMUSP00000000505,ENSMUSP00000116252,ENSMUSP00000112600,ENSMUSP00000050374,ENSMUSP00000033282,ENSMUSP00000080974,ENSMUSP00000053916,ENSMUSP00000015981,ENSMUSP00000025263,ENSMUSP00000055714,ENSMUSP00000064680,ENSMUSP00000137253,ENSMUSP00000028881,ENSMUSP00000089948,ENSMUSP00000035644,ENSMUSP00000077971,ENSMUSP00000047333,ENSMUSP00000119057,ENSMUSP00000033570,ENSMUSP00000028071,…
3	GO:1990845	adaptive thermogenesis	Biological Process	7	ENSMUSP00000080974,ENSMUSP00000119057,ENSMUSP00000064536,ENSMUSP00000007799,ENSMUSP00000069850,ENSMUSP00000103056,ENSMUSP00000023611
3	GO:0001909	leukocyte mediated cytotoxicity	Biological Process	6	ENSMUSP00000022830,ENSMUSP00000015596,ENSMUSP00000099534,ENSMUSP00000131297,ENSMUSP00000032260,ENSMUSP00000031327
3	GO:0031341	regulation of cell killing	Biological Process	7	ENSMUSP00000022830,ENSMUSP00000015596,ENSMUSP00000099534,ENSMUSP00000131297,ENSMUSP00000032260,ENSMUSP00000018610,ENSMUSP00000031327
3	GO:0031342	negative regulation of cell killing	Biological Process	1	ENSMUSP00000032260
3	GO:0031343	positive regulation of cell killing	Biological Process	4	ENSMUSP00000099534,ENSMUSP00000131297,ENSMUSP00000018610,ENSMUSP00000031327
3	GO:0031640	killing of cells of other organism	Biological Process	2	ENSMUSP00000018610,ENSMUSP00000031327
3	GO:0001776	leukocyte homeostasis	Biological Process	4	ENSMUSP00000019997,ENSMUSP00000095171,ENSMUSP00000069851,ENSMUSP00000022830
3	GO:0002252	immune effector process	Biological Process	39	ENSMUSP00000122787,ENSMUSP00000023790,ENSMUSP00000022830,ENSMUSP00000015596,ENSMUSP00000099534,ENSMUSP00000131297,ENSMUSP00000039600,ENSMUSP00000054637,ENSMUSP00000083587,ENSMUSP00000032239,ENSMUSP00000019997,ENSMUSP00000022124,ENSMUSP00000002855,ENSMUSP00000074471,ENSMUSP00000033427,ENSMUSP00000044050,ENSMUSP00000040307,ENSMUSP00000004949,ENSMUSP00000025263,ENSMUSP00000028233,ENSMUSP00000095171,…
3	GO:0002253	activation of immune response	Biological Process	16	ENSMUSP00000023790,ENSMUSP00000006625,ENSMUSP00000080974,ENSMUSP00000028233,ENSMUSP00000110102,ENSMUSP00000004910,ENSMUSP00000004949,ENSMUSP00000104548,ENSMUSP00000025263,ENSMUSP00000019997,ENSMUSP00000007799,ENSMUSP00000056669,ENSMUSP00000142428,ENSMUSP00000020970,ENSMUSP00000028259,ENSMUSP00000112675
3	GO:0002262	myeloid cell homeostasis	Biological Process	7	ENSMUSP00000082777,ENSMUSP00000112675,ENSMUSP00000069851,ENSMUSP00000047333,ENSMUSP00000099534,ENSMUSP00000082548,ENSMUSP00000090897
3	GO:0002440	production of molecular mediator of immune response	Biological Process	12	ENSMUSP00000002855,ENSMUSP00000034458,ENSMUSP00000019997,ENSMUSP00000033427,ENSMUSP00000099534,ENSMUSP00000040307,ENSMUSP00000004949,ENSMUSP00000025263,ENSMUSP00000080974,ENSMUSP00000095171,ENSMUSP00000020970,ENSMUSP00000028881
3	GO:0002507	tolerance induction	Biological Process	3	ENSMUSP00000016640,ENSMUSP00000022722,ENSMUSP00000019997
3	GO:0002520	immune system development	Biological Process	43	ENSMUSP00000103056,ENSMUSP00000067002,ENSMUSP00000148145,ENSMUSP00000032239,ENSMUSP00000122787,ENSMUSP00000019997,ENSMUSP00000016640,ENSMUSP00000022830,ENSMUSP00000025523,ENSMUSP00000121848,ENSMUSP00000033749,ENSMUSP00000047333,ENSMUSP00000112675,ENSMUSP00000002855,ENSMUSP00000069851,ENSMUSP00000082777,ENSMUSP00000025263,ENSMUSP00000024791,ENSMUSP00000064680,ENSMUSP00000004949,ENSMUSP00000104548,…
3	GO:0002682	regulation of immune system process	Biological Process	62	ENSMUSP00000122787,ENSMUSP00000023790,ENSMUSP00000022830,ENSMUSP00000015596,ENSMUSP00000099534,ENSMUSP00000131297,ENSMUSP00000006625,ENSMUSP00000080974,ENSMUSP00000039600,ENSMUSP00000054637,ENSMUSP00000024791,ENSMUSP00000095171,ENSMUSP00000019997,ENSMUSP00000033427,ENSMUSP00000083587,ENSMUSP00000044050,ENSMUSP00000040307,ENSMUSP00000004949,ENSMUSP00000025263,ENSMUSP00000022722,ENSMUSP00000104548,…
3	GO:0002683	negative regulation of immune system process	Biological Process	20	ENSMUSP00000122787,ENSMUSP00000019997,ENSMUSP00000025263,ENSMUSP00000109877,ENSMUSP00000095171,ENSMUSP00000028233,ENSMUSP00000069851,ENSMUSP00000031840,ENSMUSP00000016640,ENSMUSP00000017153,ENSMUSP00000069850,ENSMUSP00000032260,ENSMUSP00000103056,ENSMUSP00000110232,ENSMUSP00000104548,ENSMUSP00000112675,ENSMUSP00000001008,ENSMUSP00000039604,ENSMUSP00000037657,ENSMUSP00000034713
3	GO:0002684	positive regulation of immune system process	Biological Process	45	ENSMUSP00000023790,ENSMUSP00000099534,ENSMUSP00000131297,ENSMUSP00000006625,ENSMUSP00000080974,ENSMUSP00000024791,ENSMUSP00000095171,ENSMUSP00000033427,ENSMUSP00000083587,ENSMUSP00000040307,ENSMUSP00000004949,ENSMUSP00000022722,ENSMUSP00000016640,ENSMUSP00000025263,ENSMUSP00000028233,ENSMUSP00000039600,ENSMUSP00000110102,ENSMUSP00000004910,ENSMUSP00000028071,ENSMUSP00000122787,ENSMUSP00000007799,…
3	GO:0006955	immune response	Biological Process	77	ENSMUSP00000122787,ENSMUSP00000023790,ENSMUSP00000022830,ENSMUSP00000015596,ENSMUSP00000099534,ENSMUSP00000131297,ENSMUSP00000006625,ENSMUSP00000080974,ENSMUSP00000095171,ENSMUSP00000088291,ENSMUSP00000083587,ENSMUSP00000032239,ENSMUSP00000019997,ENSMUSP00000022124,ENSMUSP00000002855,ENSMUSP00000139147,ENSMUSP00000025263,ENSMUSP00000028881,ENSMUSP00000044050,ENSMUSP00000033427,ENSMUSP00000040307,…
3	GO:0019882	antigen processing and presentation	Biological Process	6	ENSMUSP00000083587,ENSMUSP00000099534,ENSMUSP00000131297,ENSMUSP00000024791,ENSMUSP00000095171,ENSMUSP00000004949
3	GO:0031294	lymphocyte costimulation	Biological Process	4	ENSMUSP00000016640,ENSMUSP00000122787,ENSMUSP00000007799,ENSMUSP00000044050
3	GO:0045058	T cell selection	Biological Process	4	ENSMUSP00000122787,ENSMUSP00000095171,ENSMUSP00000069851,ENSMUSP00000112675
3	GO:0045321	leukocyte activation	Biological Process	43	ENSMUSP00000027015,ENSMUSP00000126067,ENSMUSP00000103056,ENSMUSP00000083587,ENSMUSP00000032239,ENSMUSP00000122787,ENSMUSP00000019997,ENSMUSP00000022124,ENSMUSP00000047333,ENSMUSP00000112675,ENSMUSP00000002855,ENSMUSP00000069851,ENSMUSP00000095171,ENSMUSP00000033427,ENSMUSP00000028071,ENSMUSP00000016640,ENSMUSP00000007799,ENSMUSP00000044050,ENSMUSP00000104548,ENSMUSP00000099534,ENSMUSP00000022830,…
3	GO:0050900	leukocyte migration	Biological Process	21	ENSMUSP00000039600,ENSMUSP00000019266,ENSMUSP00000001008,ENSMUSP00000083587,ENSMUSP00000028233,ENSMUSP00000019064,ENSMUSP00000028881,ENSMUSP00000031327,ENSMUSP00000074885,ENSMUSP00000036245,ENSMUSP00000025263,ENSMUSP00000122787,ENSMUSP00000037028,ENSMUSP00000142428,ENSMUSP00000095171,ENSMUSP00000024706,ENSMUSP00000028882,ENSMUSP00000087119,ENSMUSP00000074471,ENSMUSP00000022830,ENSMUSP00000021970
3	GO:0016049	cell growth	Biological Process	17	ENSMUSP00000036245,ENSMUSP00000079699,ENSMUSP00000087119,ENSMUSP00000050374,ENSMUSP00000062277,ENSMUSP00000019064,ENSMUSP00000099907,ENSMUSP00000139147,ENSMUSP00000064536,ENSMUSP00000023583,ENSMUSP00000039604,ENSMUSP00000052465,ENSMUSP00000054499,ENSMUSP00000133302,ENSMUSP00000004910,ENSMUSP00000130684,ENSMUSP00000109794
3	GO:0040008	regulation of growth	Biological Process	25	ENSMUSP00000036245,ENSMUSP00000079699,ENSMUSP00000087119,ENSMUSP00000050374,ENSMUSP00000062277,ENSMUSP00000019064,ENSMUSP00000099907,ENSMUSP00000139147,ENSMUSP00000064536,ENSMUSP00000023583,ENSMUSP00000039604,ENSMUSP00000052465,ENSMUSP00000080974,ENSMUSP00000015981,ENSMUSP00000025263,ENSMUSP00000023788,ENSMUSP00000054499,ENSMUSP00000133302,ENSMUSP00000004910,ENSMUSP00000130684,ENSMUSP00000034214,…
3	GO:0044110	growth involved in symbiotic interaction	Biological Process	4	ENSMUSP00000080974,ENSMUSP00000015981,ENSMUSP00000025263,ENSMUSP00000023788
3	GO:0045926	negative regulation of growth	Biological Process	10	ENSMUSP00000099907,ENSMUSP00000139147,ENSMUSP00000064536,ENSMUSP00000023583,ENSMUSP00000039604,ENSMUSP00000080974,ENSMUSP00000015981,ENSMUSP00000025263,ENSMUSP00000023788,ENSMUSP00000034214
3	GO:0045927	positive regulation of growth	Biological Process	11	ENSMUSP00000079699,ENSMUSP00000087119,ENSMUSP00000050374,ENSMUSP00000062277,ENSMUSP00000019064,ENSMUSP00000054499,ENSMUSP00000133302,ENSMUSP00000004910,ENSMUSP00000130684,ENSMUSP00000033427,ENSMUSP00000039604
3	GO:0048589	developmental growth	Biological Process	18	ENSMUSP00000109884,ENSMUSP00000052465,ENSMUSP00000099907,ENSMUSP00000117834,ENSMUSP00000082777,ENSMUSP00000085423,ENSMUSP00000092041,ENSMUSP00000029377,ENSMUSP00000064536,ENSMUSP00000054499,ENSMUSP00000133302,ENSMUSP00000004910,ENSMUSP00000130684,ENSMUSP00000033427,ENSMUSP00000028515,ENSMUSP00000109794,ENSMUSP00000027053,ENSMUSP00000039604
3	GO:0002209	behavioral defense response	Biological Process	3	ENSMUSP00000044050,ENSMUSP00000133302,ENSMUSP00000064536
3	GO:0007611	learning or memory	Biological Process	13	ENSMUSP00000035065,ENSMUSP00000022429,ENSMUSP00000059977,ENSMUSP00000027015,ENSMUSP00000028881,ENSMUSP00000069850,ENSMUSP00000000769,ENSMUSP00000133302,ENSMUSP00000034713,ENSMUSP00000022176,ENSMUSP00000020278,ENSMUSP00000096152,ENSMUSP00000015596
3	GO:0007622	rhythmic behavior	Biological Process	1	ENSMUSP00000027015
3	GO:0007626	locomotory behavior	Biological Process	4	ENSMUSP00000026262,ENSMUSP00000126067,ENSMUSP00000133302,ENSMUSP00000044050
3	GO:0007631	feeding behavior	Biological Process	1	ENSMUSP00000080974
3	GO:0007632	visual behavior	Biological Process	1	ENSMUSP00000022176
3	GO:0030534	adult behavior	Biological Process	2	ENSMUSP00000026262,ENSMUSP00000126067
3	GO:0019098	reproductive behavior	Biological Process	1	ENSMUSP00000085423
3	GO:0035640	exploration behavior	Biological Process	2	ENSMUSP00000133302,ENSMUSP00000044050
3	GO:0048520	positive regulation of behavior	Biological Process	2	ENSMUSP00000027015,ENSMUSP00000064536
3	GO:0050795	regulation of behavior	Biological Process	3	ENSMUSP00000027015,ENSMUSP00000133302,ENSMUSP00000064536
3	GO:0051705	multi-organism behavior	Biological Process	2	ENSMUSP00000028881,ENSMUSP00000022345
3	GO:0061744	motor behavior	Biological Process	1	ENSMUSP00000044050
3	GO:0008284	positive regulation of cell proliferation	Biological Process	34	ENSMUSP00000007799,ENSMUSP00000095171,ENSMUSP00000033427,ENSMUSP00000028071,ENSMUSP00000028881,ENSMUSP00000099907,ENSMUSP00000071715,ENSMUSP00000016640,ENSMUSP00000122787,ENSMUSP00000039600,ENSMUSP00000004949,ENSMUSP00000015596,ENSMUSP00000054499,ENSMUSP00000035065,ENSMUSP00000025263,ENSMUSP00000074471,ENSMUSP00000022176,ENSMUSP00000094225,ENSMUSP00000109884,ENSMUSP00000083474,ENSMUSP00000127716,…
3	GO:0008285	negative regulation of cell proliferation	Biological Process	31	ENSMUSP00000133302,ENSMUSP00000025263,ENSMUSP00000064536,ENSMUSP00000007799,ENSMUSP00000000049,ENSMUSP00000015596,ENSMUSP00000050374,ENSMUSP00000031840,ENSMUSP00000016640,ENSMUSP00000122787,ENSMUSP00000017153,ENSMUSP00000069850,ENSMUSP00000144369,ENSMUSP00000062277,ENSMUSP00000019997,ENSMUSP00000121309,ENSMUSP00000023832,ENSMUSP00000103056,ENSMUSP00000000769,ENSMUSP00000028881,ENSMUSP00000022576,…
3	GO:0014009	glial cell proliferation	Biological Process	3	ENSMUSP00000083474,ENSMUSP00000025263,ENSMUSP00000028881
3	GO:0033002	muscle cell proliferation	Biological Process	13	ENSMUSP00000035065,ENSMUSP00000025263,ENSMUSP00000074471,ENSMUSP00000022176,ENSMUSP00000039600,ENSMUSP00000094225,ENSMUSP00000004949,ENSMUSP00000015596,ENSMUSP00000019997,ENSMUSP00000121309,ENSMUSP00000007799,ENSMUSP00000064536,ENSMUSP00000034026
3	GO:0033687	osteoblast proliferation	Biological Process	1	ENSMUSP00000064680
3	GO:0035726	common myeloid progenitor cell proliferation	Biological Process	1	ENSMUSP00000069851
3	GO:0035988	chondrocyte proliferation	Biological Process	1	ENSMUSP00000087119
3	GO:0042127	regulation of cell proliferation	Biological Process	61	ENSMUSP00000133302,ENSMUSP00000025263,ENSMUSP00000064536,ENSMUSP00000007799,ENSMUSP00000000049,ENSMUSP00000015596,ENSMUSP00000054499,ENSMUSP00000025523,ENSMUSP00000035065,ENSMUSP00000055637,ENSMUSP00000091692,ENSMUSP00000070868,ENSMUSP00000028881,ENSMUSP00000022176,ENSMUSP00000030622,ENSMUSP00000035179,ENSMUSP00000044050,ENSMUSP00000133279,ENSMUSP00000056691,ENSMUSP00000145462,ENSMUSP00000035562,…
3	GO:0048144	fibroblast proliferation	Biological Process	5	ENSMUSP00000054499,ENSMUSP00000095171,ENSMUSP00000015596,ENSMUSP00000144369,ENSMUSP00000062277
3	GO:0050673	epithelial cell proliferation	Biological Process	17	ENSMUSP00000087119,ENSMUSP00000133302,ENSMUSP00000025263,ENSMUSP00000064536,ENSMUSP00000007799,ENSMUSP00000000049,ENSMUSP00000015596,ENSMUSP00000050374,ENSMUSP00000069850,ENSMUSP00000099907,ENSMUSP00000071715,ENSMUSP00000039600,ENSMUSP00000023832,ENSMUSP00000109884,ENSMUSP00000000769,ENSMUSP00000022576,ENSMUSP00000019997
3	GO:0061323	cell proliferation involved in heart morphogenesis	Biological Process	1	ENSMUSP00000087485
3	GO:0061351	neural precursor cell proliferation	Biological Process	3	ENSMUSP00000043088,ENSMUSP00000028881,ENSMUSP00000087485
3	GO:0070341	fat cell proliferation	Biological Process	1	ENSMUSP00000127716
3	GO:0070661	leukocyte proliferation	Biological Process	19	ENSMUSP00000022124,ENSMUSP00000095171,ENSMUSP00000033427,ENSMUSP00000028071,ENSMUSP00000028881,ENSMUSP00000037206,ENSMUSP00000020964,ENSMUSP00000016640,ENSMUSP00000122787,ENSMUSP00000039600,ENSMUSP00000004949,ENSMUSP00000015596,ENSMUSP00000054637,ENSMUSP00000031840,ENSMUSP00000017153,ENSMUSP00000069850,ENSMUSP00000022830,ENSMUSP00000103056,ENSMUSP00000104548
3	GO:0072089	stem cell proliferation	Biological Process	2	ENSMUSP00000043088,ENSMUSP00000031327
3	GO:0007059	chromosome segregation	Biological Process	8	ENSMUSP00000047700,ENSMUSP00000031072,ENSMUSP00000136323,ENSMUSP00000020931,ENSMUSP00000055714,ENSMUSP00000116259,ENSMUSP00000003759,ENSMUSP00000046732
3	GO:0007017	microtubule-based process	Biological Process	21	ENSMUSP00000127990,ENSMUSP00000033282,ENSMUSP00000037000,ENSMUSP00000000776,ENSMUSP00000030636,ENSMUSP00000022009,ENSMUSP00000111309,ENSMUSP00000022784,ENSMUSP00000049973,ENSMUSP00000036614,ENSMUSP00000150618,ENSMUSP00000101312,ENSMUSP00000126067,ENSMUSP00000007799,ENSMUSP00000006625,ENSMUSP00000018645,ENSMUSP00000033570,ENSMUSP00000062637,ENSMUSP00000025779,ENSMUSP00000113252,ENSMUSP00000078429
3	GO:0000075	cell cycle checkpoint	Biological Process	2	ENSMUSP00000030622,ENSMUSP00000057573
3	GO:0000920	septum digestion after cytokinesis	Biological Process	1	ENSMUSP00000047700
3	GO:0001775	cell activation	Biological Process	47	ENSMUSP00000027015,ENSMUSP00000126067,ENSMUSP00000103056,ENSMUSP00000083587,ENSMUSP00000032239,ENSMUSP00000122787,ENSMUSP00000019997,ENSMUSP00000022124,ENSMUSP00000133302,ENSMUSP00000141648,ENSMUSP00000047333,ENSMUSP00000112675,ENSMUSP00000002855,ENSMUSP00000069851,ENSMUSP00000095171,ENSMUSP00000033427,ENSMUSP00000028071,ENSMUSP00000016640,ENSMUSP00000007799,ENSMUSP00000044050,ENSMUSP00000104548,…
3	GO:0006457	protein folding	Biological Process	10	ENSMUSP00000027961,ENSMUSP00000099534,ENSMUSP00000041380,ENSMUSP00000095171,ENSMUSP00000053916,ENSMUSP00000009707,ENSMUSP00000037206,ENSMUSP00000020964,ENSMUSP00000113761,ENSMUSP00000022419
3	GO:0007165	signal transduction	Biological Process	155	ENSMUSP00000025263,ENSMUSP00000028881,ENSMUSP00000039600,ENSMUSP00000069851,ENSMUSP00000001008,ENSMUSP00000086459,ENSMUSP00000051492,ENSMUSP00000040307,ENSMUSP00000095171,ENSMUSP00000071715,ENSMUSP00000007799,ENSMUSP00000050374,ENSMUSP00000080974,ENSMUSP00000053394,ENSMUSP00000085293,ENSMUSP00000023788,ENSMUSP00000058629,ENSMUSP00000109884,ENSMUSP00000035167,ENSMUSP00000025523,ENSMUSP00000029711,…
3	GO:0006903	vesicle targeting	Biological Process	1	ENSMUSP00000020653
3	GO:0006928	movement of cell or subcellular component	Biological Process	53	ENSMUSP00000109794,ENSMUSP00000064536,ENSMUSP00000039600,ENSMUSP00000019266,ENSMUSP00000001008,ENSMUSP00000083587,ENSMUSP00000025523,ENSMUSP00000036614,ENSMUSP00000054499,ENSMUSP00000087736,ENSMUSP00000000769,ENSMUSP00000000049,ENSMUSP00000015596,ENSMUSP00000099907,ENSMUSP00000028233,ENSMUSP00000101312,ENSMUSP00000017153,ENSMUSP00000019064,ENSMUSP00000087119,ENSMUSP00000022429,ENSMUSP00000019997,…
3	GO:0006949	syncytium formation	Biological Process	1	ENSMUSP00000027015
3	GO:0007049	cell cycle	Biological Process	50	ENSMUSP00000050374,ENSMUSP00000033282,ENSMUSP00000071715,ENSMUSP00000094225,ENSMUSP00000061305,ENSMUSP00000127990,ENSMUSP00000037000,ENSMUSP00000090059,ENSMUSP00000030636,ENSMUSP00000064680,ENSMUSP00000023217,ENSMUSP00000045527,ENSMUSP00000018985,ENSMUSP00000104548,ENSMUSP00000112600,ENSMUSP00000111309,ENSMUSP00000047700,ENSMUSP00000030622,ENSMUSP00000022784,ENSMUSP00000049973,ENSMUSP00000031072,…
3	GO:0007154	cell communication	Biological Process	163	ENSMUSP00000025263,ENSMUSP00000028881,ENSMUSP00000039600,ENSMUSP00000069851,ENSMUSP00000001008,ENSMUSP00000086459,ENSMUSP00000051492,ENSMUSP00000040307,ENSMUSP00000095171,ENSMUSP00000071715,ENSMUSP00000007799,ENSMUSP00000050374,ENSMUSP00000126067,ENSMUSP00000080974,ENSMUSP00000046199,ENSMUSP00000031840,ENSMUSP00000058629,ENSMUSP00000064536,ENSMUSP00000053394,ENSMUSP00000085293,ENSMUSP00000023788,…
3	GO:0007163	establishment or maintenance of cell polarity	Biological Process	7	ENSMUSP00000127990,ENSMUSP00000033282,ENSMUSP00000037000,ENSMUSP00000022429,ENSMUSP00000033560,ENSMUSP00000064536,ENSMUSP00000035167
3	GO:0007272	ensheathment of neurons	Biological Process	4	ENSMUSP00000033800,ENSMUSP00000025263,ENSMUSP00000026262,ENSMUSP00000004910
3	GO:0008219	cell death	Biological Process	76	ENSMUSP00000050374,ENSMUSP00000137253,ENSMUSP00000095171,ENSMUSP00000027015,ENSMUSP00000015981,ENSMUSP00000025263,ENSMUSP00000019997,ENSMUSP00000019470,ENSMUSP00000022419,ENSMUSP00000032888,ENSMUSP00000117229,ENSMUSP00000030154,ENSMUSP00000113761,ENSMUSP00000126067,ENSMUSP00000104272,ENSMUSP00000080717,ENSMUSP00000064536,ENSMUSP00000040307,ENSMUSP00000104548,ENSMUSP00000130759,ENSMUSP00000133360,…
3	GO:0008037	cell recognition	Biological Process	4	ENSMUSP00000080974,ENSMUSP00000127646,ENSMUSP00000099907,ENSMUSP00000091692
3	GO:0019835	cytolysis	Biological Process	1	ENSMUSP00000028233
3	GO:0016043	cellular component organization	Biological Process	189	ENSMUSP00000023217,ENSMUSP00000069004,ENSMUSP00000026173,ENSMUSP00000045201,ENSMUSP00000147061,ENSMUSP00000035179,ENSMUSP00000018985,ENSMUSP00000127990,ENSMUSP00000033282,ENSMUSP00000037000,ENSMUSP00000000776,ENSMUSP00000035644,ENSMUSP00000116259,ENSMUSP00000039604,ENSMUSP00000086987,ENSMUSP00000015981,ENSMUSP00000020931,ENSMUSP00000036245,ENSMUSP00000050374,ENSMUSP00000004968,ENSMUSP00000056715,…
3	GO:0016458	gene silencing	Biological Process	5	ENSMUSP00000028071,ENSMUSP00000089948,ENSMUSP00000084257,ENSMUSP00000133279,ENSMUSP00000018645
3	GO:0019725	cellular homeostasis	Biological Process	36	ENSMUSP00000062576,ENSMUSP00000025476,ENSMUSP00000035658,ENSMUSP00000141022,ENSMUSP00000133302,ENSMUSP00000039600,ENSMUSP00000023832,ENSMUSP00000007799,ENSMUSP00000001008,ENSMUSP00000104485,ENSMUSP00000042918,ENSMUSP00000048770,ENSMUSP00000034214,ENSMUSP00000038106,ENSMUSP00000029900,ENSMUSP00000024932,ENSMUSP00000080974,ENSMUSP00000028881,ENSMUSP00000031327,ENSMUSP00000064536,ENSMUSP00000020964,…
3	GO:0022402	cell cycle process	Biological Process	30	ENSMUSP00000071715,ENSMUSP00000094225,ENSMUSP00000061305,ENSMUSP00000127990,ENSMUSP00000033282,ENSMUSP00000037000,ENSMUSP00000030636,ENSMUSP00000104548,ENSMUSP00000112600,ENSMUSP00000111309,ENSMUSP00000047700,ENSMUSP00000030622,ENSMUSP00000022784,ENSMUSP00000049973,ENSMUSP00000031072,ENSMUSP00000022009,ENSMUSP00000057573,ENSMUSP00000025263,ENSMUSP00000028881,ENSMUSP00000028882,ENSMUSP00000006625,…
3	GO:0022406	membrane docking	Biological Process	2	ENSMUSP00000089051,ENSMUSP00000083587
3	GO:0022412	cellular process involved in reproduction in multicellular organism	Biological Process	3	ENSMUSP00000085423,ENSMUSP00000094211,ENSMUSP00000091692
3	GO:0030029	actin filament-based process	Biological Process	22	ENSMUSP00000085566,ENSMUSP00000033560,ENSMUSP00000062277,ENSMUSP00000103546,ENSMUSP00000033721,ENSMUSP00000087736,ENSMUSP00000096152,ENSMUSP00000047275,ENSMUSP00000083587,ENSMUSP00000025263,ENSMUSP00000053394,ENSMUSP00000029711,ENSMUSP00000028882,ENSMUSP00000045527,ENSMUSP00000145451,ENSMUSP00000071486,ENSMUSP00000007317,ENSMUSP00000049440,ENSMUSP00000017153,ENSMUSP00000030636,ENSMUSP00000007799,…
3	GO:0032940	secretion by cell	Biological Process	42	ENSMUSP00000126067,ENSMUSP00000089051,ENSMUSP00000025263,ENSMUSP00000022576,ENSMUSP00000105415,ENSMUSP00000035898,ENSMUSP00000039600,ENSMUSP00000038502,ENSMUSP00000001008,ENSMUSP00000018610,ENSMUSP00000028881,ENSMUSP00000141648,ENSMUSP00000125314,ENSMUSP00000059977,ENSMUSP00000020278,ENSMUSP00000020964,ENSMUSP00000020312,ENSMUSP00000064536,ENSMUSP00000099907,ENSMUSP00000028259,ENSMUSP00000092041,…
3	GO:0033059	cellular pigmentation	Biological Process	1	ENSMUSP00000036614
3	GO:0044764	multi-organism cellular process	Biological Process	1	ENSMUSP00000028259
3	GO:0045103	intermediate filament-based process	Biological Process	5	ENSMUSP00000007280,ENSMUSP00000041347,ENSMUSP00000023788,ENSMUSP00000079699,ENSMUSP00000007272
3	GO:0048522	positive regulation of cellular process	Biological Process	149	ENSMUSP00000025263,ENSMUSP00000040307,ENSMUSP00000086459,ENSMUSP00000095171,ENSMUSP00000028881,ENSMUSP00000071715,ENSMUSP00000126067,ENSMUSP00000031840,ENSMUSP00000025523,ENSMUSP00000015981,ENSMUSP00000122787,ENSMUSP00000027639,ENSMUSP00000058629,ENSMUSP00000029711,ENSMUSP00000015596,ENSMUSP00000007799,ENSMUSP00000083587,ENSMUSP00000022576,ENSMUSP00000027015,ENSMUSP00000039604,ENSMUSP00000080717,…
3	GO:0048523	negative regulation of cellular process	Biological Process	142	ENSMUSP00000080974,ENSMUSP00000053916,ENSMUSP00000015981,ENSMUSP00000025263,ENSMUSP00000055714,ENSMUSP00000064680,ENSMUSP00000137253,ENSMUSP00000028881,ENSMUSP00000089948,ENSMUSP00000035644,ENSMUSP00000077971,ENSMUSP00000047333,ENSMUSP00000119057,ENSMUSP00000033570,ENSMUSP00000028071,ENSMUSP00000112675,ENSMUSP00000007799,ENSMUSP00000069850,ENSMUSP00000032194,ENSMUSP00000103056,ENSMUSP00000088291,…
3	GO:0048869	cellular developmental process	Biological Process	126	ENSMUSP00000064680,ENSMUSP00000007799,ENSMUSP00000083810,ENSMUSP00000031840,ENSMUSP00000064536,ENSMUSP00000001008,ENSMUSP00000109794,ENSMUSP00000103056,ENSMUSP00000004968,ENSMUSP00000121848,ENSMUSP00000067002,ENSMUSP00000148145,ENSMUSP00000032239,ENSMUSP00000122787,ENSMUSP00000019997,ENSMUSP00000050374,ENSMUSP00000085423,ENSMUSP00000094211,ENSMUSP00000043088,ENSMUSP00000030636,ENSMUSP00000025523,…
3	GO:0050794	regulation of cellular process	Biological Process	281	ENSMUSP00000050374,ENSMUSP00000033282,ENSMUSP00000080974,ENSMUSP00000053916,ENSMUSP00000015981,ENSMUSP00000025263,ENSMUSP00000055714,ENSMUSP00000064680,ENSMUSP00000137253,ENSMUSP00000028881,ENSMUSP00000089948,ENSMUSP00000035644,ENSMUSP00000077971,ENSMUSP00000047333,ENSMUSP00000119057,ENSMUSP00000033570,ENSMUSP00000028071,ENSMUSP00000112675,ENSMUSP00000007799,ENSMUSP00000069850,ENSMUSP00000032194,…
3	GO:0051301	cell division	Biological Process	18	ENSMUSP00000030636,ENSMUSP00000047700,ENSMUSP00000050374,ENSMUSP00000028071,ENSMUSP00000109884,ENSMUSP00000028881,ENSMUSP00000028882,ENSMUSP00000025779,ENSMUSP00000083474,ENSMUSP00000055714,ENSMUSP00000127990,ENSMUSP00000022009,ENSMUSP00000046732,ENSMUSP00000031072,ENSMUSP00000022784,ENSMUSP00000049973,ENSMUSP00000061305,ENSMUSP00000074340
3	GO:0051651	maintenance of location in cell	Biological Process	4	ENSMUSP00000002855,ENSMUSP00000007799,ENSMUSP00000144369,ENSMUSP00000133302
3	GO:0051716	cellular response to stimulus	Biological Process	214	ENSMUSP00000025263,ENSMUSP00000028881,ENSMUSP00000039600,ENSMUSP00000069851,ENSMUSP00000001008,ENSMUSP00000086459,ENSMUSP00000051492,ENSMUSP00000040307,ENSMUSP00000095171,ENSMUSP00000071715,ENSMUSP00000007799,ENSMUSP00000062576,ENSMUSP00000020931,ENSMUSP00000018985,ENSMUSP00000050374,ENSMUSP00000080974,ENSMUSP00000019266,ENSMUSP00000053394,ENSMUSP00000085293,ENSMUSP00000023788,ENSMUSP00000058629,…
3	GO:0060352	cell adhesion molecule production	Biological Process	1	ENSMUSP00000007799
3	GO:0061919	process utilizing autophagic mechanism	Biological Process	16	ENSMUSP00000026173,ENSMUSP00000045201,ENSMUSP00000147061,ENSMUSP00000015981,ENSMUSP00000127646,ENSMUSP00000139608,ENSMUSP00000008748,ENSMUSP00000065423,ENSMUSP00000027015,ENSMUSP00000063390,ENSMUSP00000019997,ENSMUSP00000033264,ENSMUSP00000015596,ENSMUSP00000035658,ENSMUSP00000126067,ENSMUSP00000039604
3	GO:0071804	cellular potassium ion transport	Biological Process	4	ENSMUSP00000038106,ENSMUSP00000018614,ENSMUSP00000015596,ENSMUSP00000007799
3	GO:0097194	execution phase of apoptosis	Biological Process	1	ENSMUSP00000027015
3	GO:0140029	exocytic process	Biological Process	1	ENSMUSP00000089051
3	GO:0140253	cell-cell fusion	Biological Process	1	ENSMUSP00000027015
3	GO:1990748	cellular detoxification	Biological Process	9	ENSMUSP00000133302,ENSMUSP00000035065,ENSMUSP00000090897,ENSMUSP00000059977,ENSMUSP00000071130,ENSMUSP00000025263,ENSMUSP00000023832,ENSMUSP00000080974,ENSMUSP00000087405
3	GO:0003006	developmental process involved in reproduction	Biological Process	21	ENSMUSP00000087119,ENSMUSP00000085423,ENSMUSP00000069850,ENSMUSP00000004910,ENSMUSP00000070868,ENSMUSP00000086459,ENSMUSP00000094211,ENSMUSP00000023809,ENSMUSP00000027053,ENSMUSP00000023583,ENSMUSP00000121309,ENSMUSP00000029711,ENSMUSP00000086094,ENSMUSP00000028881,ENSMUSP00000028882,ENSMUSP00000035065,ENSMUSP00000064680,ENSMUSP00000007317,ENSMUSP00000000769,ENSMUSP00000083587,ENSMUSP00000089051
3	GO:0007566	embryo implantation	Biological Process	2	ENSMUSP00000035065,ENSMUSP00000032228
3	GO:0009566	fertilization	Biological Process	3	ENSMUSP00000127646,ENSMUSP00000091692,ENSMUSP00000085423
3	GO:0022602	ovulation cycle process	Biological Process	1	ENSMUSP00000070868
3	GO:0035036	sperm-egg recognition	Biological Process	2	ENSMUSP00000127646,ENSMUSP00000091692
3	GO:0044703	multi-organism reproductive process	Biological Process	15	ENSMUSP00000070868,ENSMUSP00000085423,ENSMUSP00000151886,ENSMUSP00000023832,ENSMUSP00000094211,ENSMUSP00000034746,ENSMUSP00000051492,ENSMUSP00000127646,ENSMUSP00000091692,ENSMUSP00000034026,ENSMUSP00000035065,ENSMUSP00000032228,ENSMUSP00000026262,ENSMUSP00000028881,ENSMUSP00000064680
3	GO:0048609	multicellular organismal reproductive process	Biological Process	12	ENSMUSP00000070868,ENSMUSP00000085423,ENSMUSP00000151886,ENSMUSP00000023832,ENSMUSP00000094211,ENSMUSP00000034746,ENSMUSP00000051492,ENSMUSP00000035065,ENSMUSP00000028881,ENSMUSP00000034026,ENSMUSP00000000769,ENSMUSP00000064680
3	GO:0051321	meiotic cell cycle	Biological Process	4	ENSMUSP00000136323,ENSMUSP00000000776,ENSMUSP00000094211,ENSMUSP00000034746
3	GO:0060767	epithelial cell proliferation involved in prostate gland development	Biological Process	1	ENSMUSP00000000769
3	GO:1903046	meiotic cell cycle process	Biological Process	1	ENSMUSP00000136323
3	GO:2000241	regulation of reproductive process	Biological Process	2	ENSMUSP00000000769,ENSMUSP00000028882
3	GO:2000242	negative regulation of reproductive process	Biological Process	2	ENSMUSP00000000769,ENSMUSP00000028882
3	GO:0007155	cell adhesion	Biological Process	40	ENSMUSP00000074340,ENSMUSP00000139147,ENSMUSP00000080974,ENSMUSP00000083587,ENSMUSP00000039600,ENSMUSP00000054499,ENSMUSP00000141648,ENSMUSP00000145451,ENSMUSP00000122787,ENSMUSP00000015596,ENSMUSP00000109884,ENSMUSP00000106087,ENSMUSP00000016640,ENSMUSP00000007799,ENSMUSP00000044050,ENSMUSP00000117834,ENSMUSP00000028881,ENSMUSP00000028071,ENSMUSP00000065719,ENSMUSP00000033053,ENSMUSP00000019997,…
3	GO:0044406	adhesion of symbiont to host	Biological Process	2	ENSMUSP00000083587,ENSMUSP00000132435
3	GO:0007267	cell-cell signaling	Biological Process	37	ENSMUSP00000126067,ENSMUSP00000023788,ENSMUSP00000058629,ENSMUSP00000109884,ENSMUSP00000035167,ENSMUSP00000028515,ENSMUSP00000089051,ENSMUSP00000096152,ENSMUSP00000025263,ENSMUSP00000018610,ENSMUSP00000028881,ENSMUSP00000039600,ENSMUSP00000020278,ENSMUSP00000038502,ENSMUSP00000020964,ENSMUSP00000065719,ENSMUSP00000024932,ENSMUSP00000019997,ENSMUSP00000035065,ENSMUSP00000020312,ENSMUSP00000064536,…
3	GO:0023051	regulation of signaling	Biological Process	100	ENSMUSP00000025263,ENSMUSP00000040307,ENSMUSP00000086459,ENSMUSP00000095171,ENSMUSP00000028881,ENSMUSP00000071715,ENSMUSP00000007799,ENSMUSP00000021963,ENSMUSP00000126067,ENSMUSP00000080717,ENSMUSP00000004949,ENSMUSP00000039604,ENSMUSP00000018610,ENSMUSP00000039600,ENSMUSP00000127990,ENSMUSP00000062637,ENSMUSP00000036240,ENSMUSP00000033570,ENSMUSP00000025523,ENSMUSP00000029711,ENSMUSP00000031840,…
3	GO:0023056	positive regulation of signaling	Biological Process	56	ENSMUSP00000025263,ENSMUSP00000040307,ENSMUSP00000086459,ENSMUSP00000095171,ENSMUSP00000028881,ENSMUSP00000071715,ENSMUSP00000126067,ENSMUSP00000080717,ENSMUSP00000004949,ENSMUSP00000039604,ENSMUSP00000007799,ENSMUSP00000020278,ENSMUSP00000039600,ENSMUSP00000024932,ENSMUSP00000019997,ENSMUSP00000022124,ENSMUSP00000020312,ENSMUSP00000064536,ENSMUSP00000022176,ENSMUSP00000041503,ENSMUSP00000028882,…
3	GO:0023057	negative regulation of signaling	Biological Process	45	ENSMUSP00000007799,ENSMUSP00000025523,ENSMUSP00000029711,ENSMUSP00000126067,ENSMUSP00000112675,ENSMUSP00000039600,ENSMUSP00000047333,ENSMUSP00000058629,ENSMUSP00000154338,ENSMUSP00000035065,ENSMUSP00000089051,ENSMUSP00000059977,ENSMUSP00000033570,ENSMUSP00000020278,ENSMUSP00000019997,ENSMUSP00000030636,ENSMUSP00000037657,ENSMUSP00000104548,ENSMUSP00000088291,ENSMUSP00000133302,ENSMUSP00000028881,…
3	GO:0035637	multicellular organismal signaling	Biological Process	4	ENSMUSP00000020964,ENSMUSP00000028515,ENSMUSP00000064536,ENSMUSP00000007799
3	GO:0001503	ossification	Biological Process	17	ENSMUSP00000031840,ENSMUSP00000064680,ENSMUSP00000064536,ENSMUSP00000001008,ENSMUSP00000087119,ENSMUSP00000121848,ENSMUSP00000020970,ENSMUSP00000035065,ENSMUSP00000026972,ENSMUSP00000082548,ENSMUSP00000023583,ENSMUSP00000058629,ENSMUSP00000025263,ENSMUSP00000148145,ENSMUSP00000069850,ENSMUSP00000102213,ENSMUSP00000004949
3	GO:0001763	morphogenesis of a branching structure	Biological Process	5	ENSMUSP00000087119,ENSMUSP00000027053,ENSMUSP00000025263,ENSMUSP00000099907,ENSMUSP00000028881
3	GO:0001816	cytokine production	Biological Process	44	ENSMUSP00000031840,ENSMUSP00000025263,ENSMUSP00000002855,ENSMUSP00000099534,ENSMUSP00000033427,ENSMUSP00000040307,ENSMUSP00000004949,ENSMUSP00000035065,ENSMUSP00000028881,ENSMUSP00000028882,ENSMUSP00000028233,ENSMUSP00000056669,ENSMUSP00000104548,ENSMUSP00000122787,ENSMUSP00000027015,ENSMUSP00000082548,ENSMUSP00000022830,ENSMUSP00000085293,ENSMUSP00000016640,ENSMUSP00000019997,ENSMUSP00000015596,…
3	GO:0002021	response to dietary excess	Biological Process	1	ENSMUSP00000133302
3	GO:0002532	production of molecular mediator involved in inflammatory response	Biological Process	3	ENSMUSP00000071130,ENSMUSP00000018610,ENSMUSP00000087587
3	GO:0003008	system process	Biological Process	43	ENSMUSP00000007799,ENSMUSP00000020964,ENSMUSP00000028515,ENSMUSP00000080974,ENSMUSP00000064536,ENSMUSP00000103546,ENSMUSP00000037206,ENSMUSP00000096152,ENSMUSP00000069965,ENSMUSP00000027053,ENSMUSP00000091474,ENSMUSP00000026262,ENSMUSP00000083587,ENSMUSP00000102213,ENSMUSP00000149022,ENSMUSP00000150761,ENSMUSP00000143864,ENSMUSP00000015596,ENSMUSP00000035065,ENSMUSP00000022429,ENSMUSP00000059977,…
3	GO:0007275	multicellular organism development	Biological Process	157	ENSMUSP00000026262,ENSMUSP00000026972,ENSMUSP00000102213,ENSMUSP00000028071,ENSMUSP00000054499,ENSMUSP00000109794,ENSMUSP00000035065,ENSMUSP00000087119,ENSMUSP00000139147,ENSMUSP00000085566,ENSMUSP00000007799,ENSMUSP00000085423,ENSMUSP00000069850,ENSMUSP00000004910,ENSMUSP00000070868,ENSMUSP00000082777,ENSMUSP00000065719,ENSMUSP00000064680,ENSMUSP00000083810,ENSMUSP00000027053,ENSMUSP00000017153,…
3	GO:0007389	pattern specification process	Biological Process	10	ENSMUSP00000032194,ENSMUSP00000064536,ENSMUSP00000035167,ENSMUSP00000062637,ENSMUSP00000036240,ENSMUSP00000028071,ENSMUSP00000109794,ENSMUSP00000086459,ENSMUSP00000034746,ENSMUSP00000023809
3	GO:0007586	digestion	Biological Process	2	ENSMUSP00000080974,ENSMUSP00000034713
3	GO:0009791	post-embryonic development	Biological Process	2	ENSMUSP00000144369,ENSMUSP00000085423
3	GO:0010232	vascular transport	Biological Process	1	ENSMUSP00000064536
3	GO:0019827	stem cell population maintenance	Biological Process	2	ENSMUSP00000037000,ENSMUSP00000109884
3	GO:0022404	molting cycle process	Biological Process	3	ENSMUSP00000079699,ENSMUSP00000001611,ENSMUSP00000025263
3	GO:0030431	sleep	Biological Process	1	ENSMUSP00000027015
3	GO:0031424	keratinization	Biological Process	6	ENSMUSP00000023788,ENSMUSP00000079699,ENSMUSP00000007280,ENSMUSP00000050374,ENSMUSP00000028882,ENSMUSP00000053751
3	GO:0032922	circadian regulation of gene expression	Biological Process	2	ENSMUSP00000083474,ENSMUSP00000032194
3	GO:0032941	secretion by tissue	Biological Process	1	ENSMUSP00000064536
3	GO:0033555	multicellular organismal response to stress	Biological Process	4	ENSMUSP00000044050,ENSMUSP00000087405,ENSMUSP00000133302,ENSMUSP00000064536
3	GO:0034381	plasma lipoprotein particle clearance	Biological Process	3	ENSMUSP00000034713,ENSMUSP00000133302,ENSMUSP00000080974
3	GO:0035264	multicellular organism growth	Biological Process	4	ENSMUSP00000117834,ENSMUSP00000082777,ENSMUSP00000085423,ENSMUSP00000092041
3	GO:0035265	organ growth	Biological Process	3	ENSMUSP00000082777,ENSMUSP00000033427,ENSMUSP00000064536
3	GO:0042303	molting cycle	Biological Process	6	ENSMUSP00000079699,ENSMUSP00000007272,ENSMUSP00000007280,ENSMUSP00000035065,ENSMUSP00000001611,ENSMUSP00000025263
3	GO:0044706	multi-multicellular organism process	Biological Process	5	ENSMUSP00000034026,ENSMUSP00000035065,ENSMUSP00000032228,ENSMUSP00000070868,ENSMUSP00000064680
3	GO:0045494	photoreceptor cell maintenance	Biological Process	1	ENSMUSP00000035167
3	GO:0048771	tissue remodeling	Biological Process	9	ENSMUSP00000028882,ENSMUSP00000064536,ENSMUSP00000031840,ENSMUSP00000025523,ENSMUSP00000004949,ENSMUSP00000023583,ENSMUSP00000007799,ENSMUSP00000015596,ENSMUSP00000087119
3	GO:0048871	multicellular organismal homeostasis	Biological Process	26	ENSMUSP00000028881,ENSMUSP00000028882,ENSMUSP00000062277,ENSMUSP00000052465,ENSMUSP00000035065,ENSMUSP00000025263,ENSMUSP00000039600,ENSMUSP00000070868,ENSMUSP00000002274,ENSMUSP00000022099,ENSMUSP00000025523,ENSMUSP00000004949,ENSMUSP00000035167,ENSMUSP00000023583,ENSMUSP00000033427,ENSMUSP00000007280,ENSMUSP00000023790,ENSMUSP00000030636,ENSMUSP00000050374,ENSMUSP00000080974,ENSMUSP00000119057,…
3	GO:0050817	coagulation	Biological Process	9	ENSMUSP00000083204,ENSMUSP00000141648,ENSMUSP00000022576,ENSMUSP00000000049,ENSMUSP00000033821,ENSMUSP00000133302,ENSMUSP00000007799,ENSMUSP00000080974,ENSMUSP00000089051
3	GO:0050879	multicellular organismal movement	Biological Process	1	ENSMUSP00000028515
3	GO:0051239	regulation of multicellular organismal process	Biological Process	99	ENSMUSP00000031840,ENSMUSP00000025263,ENSMUSP00000007799,ENSMUSP00000020964,ENSMUSP00000099534,ENSMUSP00000033427,ENSMUSP00000040307,ENSMUSP00000004949,ENSMUSP00000016640,ENSMUSP00000064536,ENSMUSP00000035065,ENSMUSP00000059977,ENSMUSP00000087405,ENSMUSP00000133302,ENSMUSP00000028881,ENSMUSP00000028882,ENSMUSP00000028233,ENSMUSP00000000769,ENSMUSP00000000049,ENSMUSP00000015596,ENSMUSP00000099907,…
3	GO:0051240	positive regulation of multicellular organismal process	Biological Process	74	ENSMUSP00000025263,ENSMUSP00000099534,ENSMUSP00000033427,ENSMUSP00000040307,ENSMUSP00000004949,ENSMUSP00000016640,ENSMUSP00000064536,ENSMUSP00000035065,ENSMUSP00000059977,ENSMUSP00000087405,ENSMUSP00000028881,ENSMUSP00000028882,ENSMUSP00000028233,ENSMUSP00000099907,ENSMUSP00000015596,ENSMUSP00000133302,ENSMUSP00000111309,ENSMUSP00000127990,ENSMUSP00000058629,ENSMUSP00000037028,ENSMUSP00000000769,…
3	GO:0051241	negative regulation of multicellular organismal process	Biological Process	44	ENSMUSP00000031840,ENSMUSP00000025263,ENSMUSP00000020964,ENSMUSP00000133302,ENSMUSP00000000769,ENSMUSP00000000049,ENSMUSP00000015596,ENSMUSP00000099907,ENSMUSP00000099534,ENSMUSP00000046199,ENSMUSP00000080974,ENSMUSP00000035061,ENSMUSP00000023583,ENSMUSP00000016640,ENSMUSP00000019997,ENSMUSP00000015540,ENSMUSP00000088291,ENSMUSP00000020278,ENSMUSP00000109884,ENSMUSP00000141648,ENSMUSP00000022576,…
3	GO:0071827	plasma lipoprotein particle organization	Biological Process	2	ENSMUSP00000133302,ENSMUSP00000024706
3	GO:0090130	tissue migration	Biological Process	9	ENSMUSP00000000769,ENSMUSP00000000049,ENSMUSP00000015596,ENSMUSP00000099907,ENSMUSP00000133302,ENSMUSP00000044050,ENSMUSP00000007280,ENSMUSP00000035065,ENSMUSP00000087736
3	GO:0097242	amyloid-beta clearance	Biological Process	3	ENSMUSP00000133302,ENSMUSP00000034713,ENSMUSP00000027639
3	GO:0009653	anatomical structure morphogenesis	Biological Process	75	ENSMUSP00000054499,ENSMUSP00000109794,ENSMUSP00000035065,ENSMUSP00000087119,ENSMUSP00000139147,ENSMUSP00000085566,ENSMUSP00000007799,ENSMUSP00000064680,ENSMUSP00000083810,ENSMUSP00000031103,ENSMUSP00000065719,ENSMUSP00000032194,ENSMUSP00000017153,ENSMUSP00000004949,ENSMUSP00000004968,ENSMUSP00000064536,ENSMUSP00000035167,ENSMUSP00000062637,ENSMUSP00000023788,ENSMUSP00000079699,ENSMUSP00000007280,…
3	GO:0007568	aging	Biological Process	13	ENSMUSP00000144369,ENSMUSP00000015596,ENSMUSP00000020931,ENSMUSP00000007799,ENSMUSP00000007272,ENSMUSP00000133302,ENSMUSP00000007280,ENSMUSP00000035065,ENSMUSP00000089948,ENSMUSP00000022176,ENSMUSP00000023832,ENSMUSP00000000769,ENSMUSP00000080993
3	GO:0048646	anatomical structure formation involved in morphogenesis	Biological Process	35	ENSMUSP00000054499,ENSMUSP00000109794,ENSMUSP00000035065,ENSMUSP00000087119,ENSMUSP00000139147,ENSMUSP00000085566,ENSMUSP00000007799,ENSMUSP00000032194,ENSMUSP00000064680,ENSMUSP00000017153,ENSMUSP00000004949,ENSMUSP00000019997,ENSMUSP00000027015,ENSMUSP00000046199,ENSMUSP00000080974,ENSMUSP00000035061,ENSMUSP00000000769,ENSMUSP00000000049,ENSMUSP00000033560,ENSMUSP00000096152,ENSMUSP00000087736,…
3	GO:0021700	developmental maturation	Biological Process	8	ENSMUSP00000064536,ENSMUSP00000089051,ENSMUSP00000036614,ENSMUSP00000026972,ENSMUSP00000141648,ENSMUSP00000082777,ENSMUSP00000047333,ENSMUSP00000001611
3	GO:0048532	anatomical structure arrangement	Biological Process	1	ENSMUSP00000109794
3	GO:0048856	anatomical structure development	Biological Process	171	ENSMUSP00000026262,ENSMUSP00000026972,ENSMUSP00000102213,ENSMUSP00000028071,ENSMUSP00000054499,ENSMUSP00000109794,ENSMUSP00000035065,ENSMUSP00000087119,ENSMUSP00000139147,ENSMUSP00000085566,ENSMUSP00000007799,ENSMUSP00000085423,ENSMUSP00000069850,ENSMUSP00000004910,ENSMUSP00000070868,ENSMUSP00000082777,ENSMUSP00000065719,ENSMUSP00000064680,ENSMUSP00000083810,ENSMUSP00000027053,ENSMUSP00000017153,…
3	GO:0050793	regulation of developmental process	Biological Process	86	ENSMUSP00000019997,ENSMUSP00000016640,ENSMUSP00000054499,ENSMUSP00000083587,ENSMUSP00000025523,ENSMUSP00000106087,ENSMUSP00000085566,ENSMUSP00000001008,ENSMUSP00000039604,ENSMUSP00000028881,ENSMUSP00000015596,ENSMUSP00000080974,ENSMUSP00000087119,ENSMUSP00000133302,ENSMUSP00000111309,ENSMUSP00000127990,ENSMUSP00000058629,ENSMUSP00000037028,ENSMUSP00000000769,ENSMUSP00000051492,ENSMUSP00000099907,…
3	GO:0051093	negative regulation of developmental process	Biological Process	37	ENSMUSP00000039604,ENSMUSP00000133302,ENSMUSP00000099907,ENSMUSP00000099534,ENSMUSP00000046199,ENSMUSP00000080974,ENSMUSP00000035061,ENSMUSP00000000769,ENSMUSP00000000049,ENSMUSP00000023583,ENSMUSP00000007799,ENSMUSP00000025263,ENSMUSP00000109884,ENSMUSP00000103056,ENSMUSP00000110232,ENSMUSP00000095171,ENSMUSP00000104548,ENSMUSP00000056691,ENSMUSP00000069851,ENSMUSP00000112675,ENSMUSP00000021970,…
3	GO:0051094	positive regulation of developmental process	Biological Process	53	ENSMUSP00000016640,ENSMUSP00000028881,ENSMUSP00000015596,ENSMUSP00000080974,ENSMUSP00000087119,ENSMUSP00000133302,ENSMUSP00000111309,ENSMUSP00000127990,ENSMUSP00000058629,ENSMUSP00000037028,ENSMUSP00000000769,ENSMUSP00000051492,ENSMUSP00000026972,ENSMUSP00000082548,ENSMUSP00000104548,ENSMUSP00000028071,ENSMUSP00000099907,ENSMUSP00000071715,ENSMUSP00000033427,ENSMUSP00000015540,ENSMUSP00000103056,…
3	GO:0098727	maintenance of cell number	Biological Process	2	ENSMUSP00000109884,ENSMUSP00000037000
3	GO:0033058	directional locomotion	Biological Process	1	ENSMUSP00000049440
3	GO:0040012	regulation of locomotion	Biological Process	38	ENSMUSP00000083587,ENSMUSP00000000769,ENSMUSP00000000049,ENSMUSP00000015596,ENSMUSP00000099907,ENSMUSP00000039600,ENSMUSP00000028233,ENSMUSP00000017153,ENSMUSP00000054499,ENSMUSP00000031840,ENSMUSP00000025523,ENSMUSP00000087119,ENSMUSP00000028881,ENSMUSP00000062277,ENSMUSP00000016640,ENSMUSP00000019064,ENSMUSP00000007799,ENSMUSP00000001008,ENSMUSP00000007280,ENSMUSP00000139147,ENSMUSP00000049440,…
3	GO:0040013	negative regulation of locomotion	Biological Process	12	ENSMUSP00000000769,ENSMUSP00000000049,ENSMUSP00000015596,ENSMUSP00000028233,ENSMUSP00000007280,ENSMUSP00000139147,ENSMUSP00000049440,ENSMUSP00000133302,ENSMUSP00000112675,ENSMUSP00000023832,ENSMUSP00000062277,ENSMUSP00000033264
3	GO:0040017	positive regulation of locomotion	Biological Process	25	ENSMUSP00000083587,ENSMUSP00000099907,ENSMUSP00000039600,ENSMUSP00000015596,ENSMUSP00000054499,ENSMUSP00000031840,ENSMUSP00000025523,ENSMUSP00000087119,ENSMUSP00000028881,ENSMUSP00000062277,ENSMUSP00000016640,ENSMUSP00000019064,ENSMUSP00000007799,ENSMUSP00000001008,ENSMUSP00000065719,ENSMUSP00000142428,ENSMUSP00000095171,ENSMUSP00000037028,ENSMUSP00000024706,ENSMUSP00000035065,ENSMUSP00000020278,…
3	GO:0042330	taxis	Biological Process	21	ENSMUSP00000039600,ENSMUSP00000019266,ENSMUSP00000001008,ENSMUSP00000120466,ENSMUSP00000031327,ENSMUSP00000019064,ENSMUSP00000074885,ENSMUSP00000109794,ENSMUSP00000025523,ENSMUSP00000028233,ENSMUSP00000028881,ENSMUSP00000036245,ENSMUSP00000006956,ENSMUSP00000054499,ENSMUSP00000112675,ENSMUSP00000015596,ENSMUSP00000021970,ENSMUSP00000037028,ENSMUSP00000142428,ENSMUSP00000095171,ENSMUSP00000024706
3	GO:0048870	cell motility	Biological Process	49	ENSMUSP00000109794,ENSMUSP00000064536,ENSMUSP00000039600,ENSMUSP00000019266,ENSMUSP00000001008,ENSMUSP00000083587,ENSMUSP00000054499,ENSMUSP00000000769,ENSMUSP00000000049,ENSMUSP00000015596,ENSMUSP00000099907,ENSMUSP00000028233,ENSMUSP00000101312,ENSMUSP00000017153,ENSMUSP00000019064,ENSMUSP00000087119,ENSMUSP00000022429,ENSMUSP00000019997,ENSMUSP00000085566,ENSMUSP00000031840,ENSMUSP00000025523,…
3	GO:0052192	movement in environment of other organism involved in symbiotic interaction	Biological Process	2	ENSMUSP00000062277,ENSMUSP00000033264
3	GO:0043476	pigment accumulation	Biological Process	1	ENSMUSP00000036614
3	GO:0048066	developmental pigmentation	Biological Process	1	ENSMUSP00000036614
3	GO:0007623	circadian rhythm	Biological Process	5	ENSMUSP00000083474,ENSMUSP00000032194,ENSMUSP00000027015,ENSMUSP00000018610,ENSMUSP00000051492
3	GO:0042698	ovulation cycle	Biological Process	2	ENSMUSP00000070868,ENSMUSP00000000769
3	GO:0042753	positive regulation of circadian rhythm	Biological Process	1	ENSMUSP00000027015
3	GO:0043902	positive regulation of multi-organism process	Biological Process	12	ENSMUSP00000022722,ENSMUSP00000022124,ENSMUSP00000004949,ENSMUSP00000062576,ENSMUSP00000133302,ENSMUSP00000028241,ENSMUSP00000116259,ENSMUSP00000095171,ENSMUSP00000033264,ENSMUSP00000048901,ENSMUSP00000018610,ENSMUSP00000031327
3	GO:0044089	positive regulation of cellular component biogenesis	Biological Process	11	ENSMUSP00000083587,ENSMUSP00000007799,ENSMUSP00000025263,ENSMUSP00000034746,ENSMUSP00000049440,ENSMUSP00000017153,ENSMUSP00000101734,ENSMUSP00000080974,ENSMUSP00000087587,ENSMUSP00000051492,ENSMUSP00000022203
3	GO:0045760	positive regulation of action potential	Biological Process	1	ENSMUSP00000025263
3	GO:0045785	positive regulation of cell adhesion	Biological Process	24	ENSMUSP00000080974,ENSMUSP00000106087,ENSMUSP00000016640,ENSMUSP00000122787,ENSMUSP00000007799,ENSMUSP00000044050,ENSMUSP00000028881,ENSMUSP00000028071,ENSMUSP00000039600,ENSMUSP00000025263,ENSMUSP00000141648,ENSMUSP00000033427,ENSMUSP00000004949,ENSMUSP00000015596,ENSMUSP00000015540,ENSMUSP00000103056,ENSMUSP00000065719,ENSMUSP00000095171,ENSMUSP00000104548,ENSMUSP00000069851,ENSMUSP00000017153,…
3	GO:0048087	positive regulation of developmental pigmentation	Biological Process	1	ENSMUSP00000036614
3	GO:0048584	positive regulation of response to stimulus	Biological Process	82	ENSMUSP00000025263,ENSMUSP00000040307,ENSMUSP00000086459,ENSMUSP00000095171,ENSMUSP00000028881,ENSMUSP00000071715,ENSMUSP00000023790,ENSMUSP00000099534,ENSMUSP00000131297,ENSMUSP00000032888,ENSMUSP00000006625,ENSMUSP00000080974,ENSMUSP00000071130,ENSMUSP00000033427,ENSMUSP00000004949,ENSMUSP00000022722,ENSMUSP00000016640,ENSMUSP00000028233,ENSMUSP00000080717,ENSMUSP00000039604,ENSMUSP00000007799,…
3	GO:0051050	positive regulation of transport	Biological Process	43	ENSMUSP00000126067,ENSMUSP00000032888,ENSMUSP00000022576,ENSMUSP00000007799,ENSMUSP00000031327,ENSMUSP00000133302,ENSMUSP00000020278,ENSMUSP00000070868,ENSMUSP00000020312,ENSMUSP00000064536,ENSMUSP00000028881,ENSMUSP00000028882,ENSMUSP00000099907,ENSMUSP00000028259,ENSMUSP00000035065,ENSMUSP00000089051,ENSMUSP00000056669,ENSMUSP00000034713,ENSMUSP00000141648,ENSMUSP00000035898,ENSMUSP00000050374,…
3	GO:0051091	positive regulation of DNA-binding transcription factor activity	Biological Process	17	ENSMUSP00000037028,ENSMUSP00000083587,ENSMUSP00000080974,ENSMUSP00000025263,ENSMUSP00000028881,ENSMUSP00000074471,ENSMUSP00000062277,ENSMUSP00000022830,ENSMUSP00000047333,ENSMUSP00000042987,ENSMUSP00000130759,ENSMUSP00000004949,ENSMUSP00000015596,ENSMUSP00000055714,ENSMUSP00000033264,ENSMUSP00000065719,ENSMUSP00000058629
3	GO:1900048	positive regulation of hemostasis	Biological Process	3	ENSMUSP00000080974,ENSMUSP00000022576,ENSMUSP00000000049
3	GO:1903829	positive regulation of cellular protein localization	Biological Process	10	ENSMUSP00000035065,ENSMUSP00000050374,ENSMUSP00000020653,ENSMUSP00000028241,ENSMUSP00000151388,ENSMUSP00000015981,ENSMUSP00000025263,ENSMUSP00000024791,ENSMUSP00000113761,ENSMUSP00000099907
3	GO:1904951	positive regulation of establishment of protein localization	Biological Process	24	ENSMUSP00000020312,ENSMUSP00000064536,ENSMUSP00000028259,ENSMUSP00000035065,ENSMUSP00000050374,ENSMUSP00000141648,ENSMUSP00000028882,ENSMUSP00000056669,ENSMUSP00000080974,ENSMUSP00000027015,ENSMUSP00000025263,ENSMUSP00000121848,ENSMUSP00000032239,ENSMUSP00000035898,ENSMUSP00000090121,ENSMUSP00000001008,ENSMUSP00000020653,ENSMUSP00000025523,ENSMUSP00000028233,ENSMUSP00000028241,ENSMUSP00000151388,…
3	GO:1905954	positive regulation of lipid localization	Biological Process	4	ENSMUSP00000133302,ENSMUSP00000080974,ENSMUSP00000028881,ENSMUSP00000028882
3	GO:0034260	negative regulation of GTPase activity	Biological Process	1	ENSMUSP00000023832
3	GO:0043433	negative regulation of DNA-binding transcription factor activity	Biological Process	3	ENSMUSP00000019997,ENSMUSP00000033264,ENSMUSP00000032194
3	GO:0043901	negative regulation of multi-organism process	Biological Process	15	ENSMUSP00000062277,ENSMUSP00000033264,ENSMUSP00000080974,ENSMUSP00000015981,ENSMUSP00000025263,ENSMUSP00000039600,ENSMUSP00000001008,ENSMUSP00000023788,ENSMUSP00000020970,ENSMUSP00000082548,ENSMUSP00000116259,ENSMUSP00000031542,ENSMUSP00000039604,ENSMUSP00000022722,ENSMUSP00000019997
3	GO:0048585	negative regulation of response to stimulus	Biological Process	55	ENSMUSP00000007799,ENSMUSP00000122787,ENSMUSP00000025263,ENSMUSP00000041503,ENSMUSP00000019997,ENSMUSP00000109877,ENSMUSP00000025523,ENSMUSP00000029711,ENSMUSP00000133302,ENSMUSP00000126067,ENSMUSP00000028233,ENSMUSP00000112675,ENSMUSP00000039600,ENSMUSP00000000049,ENSMUSP00000047333,ENSMUSP00000058629,ENSMUSP00000154338,ENSMUSP00000033570,ENSMUSP00000030636,ENSMUSP00000032260,ENSMUSP00000037657,…
3	GO:0051051	negative regulation of transport	Biological Process	23	ENSMUSP00000025263,ENSMUSP00000041503,ENSMUSP00000056715,ENSMUSP00000095171,ENSMUSP00000105736,ENSMUSP00000059977,ENSMUSP00000028881,ENSMUSP00000126067,ENSMUSP00000020278,ENSMUSP00000080974,ENSMUSP00000035898,ENSMUSP00000127716,ENSMUSP00000007799,ENSMUSP00000020970,ENSMUSP00000019997,ENSMUSP00000020964,ENSMUSP00000083587,ENSMUSP00000035065,ENSMUSP00000022176,ENSMUSP00000058042,ENSMUSP00000043245,…
3	GO:0051918	negative regulation of fibrinolysis	Biological Process	2	ENSMUSP00000022576,ENSMUSP00000000049
3	GO:1900047	negative regulation of hemostasis	Biological Process	4	ENSMUSP00000133302,ENSMUSP00000000049,ENSMUSP00000141648,ENSMUSP00000022576
3	GO:1900272	negative regulation of long-term synaptic potentiation	Biological Process	2	ENSMUSP00000133302,ENSMUSP00000015596
3	GO:1900453	negative regulation of long-term synaptic depression	Biological Process	1	ENSMUSP00000015596
3	GO:1903828	negative regulation of cellular protein localization	Biological Process	4	ENSMUSP00000080974,ENSMUSP00000088291,ENSMUSP00000127716,ENSMUSP00000043245
3	GO:1904950	negative regulation of establishment of protein localization	Biological Process	10	ENSMUSP00000025263,ENSMUSP00000080974,ENSMUSP00000020970,ENSMUSP00000019997,ENSMUSP00000022176,ENSMUSP00000020964,ENSMUSP00000028881,ENSMUSP00000058042,ENSMUSP00000043245,ENSMUSP00000054499
3	GO:1905098	negative regulation of guanyl-nucleotide exchange factor activity	Biological Process	1	ENSMUSP00000030636
3	GO:1905953	negative regulation of lipid localization	Biological Process	1	ENSMUSP00000112675
3	GO:0030155	regulation of cell adhesion	Biological Process	32	ENSMUSP00000139147,ENSMUSP00000080974,ENSMUSP00000122787,ENSMUSP00000015596,ENSMUSP00000109884,ENSMUSP00000106087,ENSMUSP00000016640,ENSMUSP00000007799,ENSMUSP00000044050,ENSMUSP00000028881,ENSMUSP00000028071,ENSMUSP00000039600,ENSMUSP00000019997,ENSMUSP00000025263,ENSMUSP00000141648,ENSMUSP00000033427,ENSMUSP00000004949,ENSMUSP00000031840,ENSMUSP00000017153,ENSMUSP00000069850,ENSMUSP00000015540,…
3	GO:0032879	regulation of localization	Biological Process	94	ENSMUSP00000126067,ENSMUSP00000025263,ENSMUSP00000041503,ENSMUSP00000032888,ENSMUSP00000056715,ENSMUSP00000083587,ENSMUSP00000095171,ENSMUSP00000022576,ENSMUSP00000020653,ENSMUSP00000105736,ENSMUSP00000018610,ENSMUSP00000028881,ENSMUSP00000039600,ENSMUSP00000007799,ENSMUSP00000000769,ENSMUSP00000000049,ENSMUSP00000015596,ENSMUSP00000099907,ENSMUSP00000059977,ENSMUSP00000028233,ENSMUSP00000017153,…
3	GO:0042752	regulation of circadian rhythm	Biological Process	3	ENSMUSP00000083474,ENSMUSP00000032194,ENSMUSP00000027015
3	GO:0043900	regulation of multi-organism process	Biological Process	28	ENSMUSP00000039600,ENSMUSP00000054637,ENSMUSP00000022722,ENSMUSP00000022124,ENSMUSP00000004949,ENSMUSP00000062277,ENSMUSP00000033264,ENSMUSP00000080974,ENSMUSP00000015981,ENSMUSP00000025263,ENSMUSP00000001008,ENSMUSP00000062576,ENSMUSP00000023788,ENSMUSP00000133302,ENSMUSP00000028241,ENSMUSP00000116259,ENSMUSP00000020970,ENSMUSP00000082548,ENSMUSP00000031542,ENSMUSP00000095171,ENSMUSP00000048901,…
3	GO:0044087	regulation of cellular component biogenesis	Biological Process	25	ENSMUSP00000020653,ENSMUSP00000089051,ENSMUSP00000047275,ENSMUSP00000083587,ENSMUSP00000030636,ENSMUSP00000126067,ENSMUSP00000007799,ENSMUSP00000025263,ENSMUSP00000133302,ENSMUSP00000045527,ENSMUSP00000034746,ENSMUSP00000006625,ENSMUSP00000049440,ENSMUSP00000106087,ENSMUSP00000017153,ENSMUSP00000033721,ENSMUSP00000096152,ENSMUSP00000087119,ENSMUSP00000101734,ENSMUSP00000080974,ENSMUSP00000087587,…
3	GO:0048070	regulation of developmental pigmentation	Biological Process	1	ENSMUSP00000036614
3	GO:0048583	regulation of response to stimulus	Biological Process	130	ENSMUSP00000025263,ENSMUSP00000040307,ENSMUSP00000086459,ENSMUSP00000095171,ENSMUSP00000028881,ENSMUSP00000071715,ENSMUSP00000007799,ENSMUSP00000122787,ENSMUSP00000023790,ENSMUSP00000022830,ENSMUSP00000015596,ENSMUSP00000099534,ENSMUSP00000131297,ENSMUSP00000041503,ENSMUSP00000032888,ENSMUSP00000006625,ENSMUSP00000080974,ENSMUSP00000039600,ENSMUSP00000054637,ENSMUSP00000019997,ENSMUSP00000071130,…
3	GO:0097006	regulation of plasma lipoprotein particle levels	Biological Process	4	ENSMUSP00000034713,ENSMUSP00000133302,ENSMUSP00000024706,ENSMUSP00000080974
3	GO:0098900	regulation of action potential	Biological Process	2	ENSMUSP00000025263,ENSMUSP00000007799
3	GO:1900046	regulation of hemostasis	Biological Process	6	ENSMUSP00000133302,ENSMUSP00000007799,ENSMUSP00000000049,ENSMUSP00000080974,ENSMUSP00000141648,ENSMUSP00000022576
3	GO:1905097	regulation of guanyl-nucleotide exchange factor activity	Biological Process	1	ENSMUSP00000030636
3	GO:0006950	response to stress	Biological Process	150	ENSMUSP00000062576,ENSMUSP00000020931,ENSMUSP00000018985,ENSMUSP00000028881,ENSMUSP00000028882,ENSMUSP00000044050,ENSMUSP00000027015,ENSMUSP00000087119,ENSMUSP00000018610,ENSMUSP00000007799,ENSMUSP00000015596,ENSMUSP00000126067,ENSMUSP00000122787,ENSMUSP00000023790,ENSMUSP00000006625,ENSMUSP00000080974,ENSMUSP00000039600,ENSMUSP00000054637,ENSMUSP00000083587,ENSMUSP00000025263,ENSMUSP00000031327,…
3	GO:0009605	response to external stimulus	Biological Process	97	ENSMUSP00000122787,ENSMUSP00000133302,ENSMUSP00000039600,ENSMUSP00000054637,ENSMUSP00000056669,ENSMUSP00000019997,ENSMUSP00000099534,ENSMUSP00000031327,ENSMUSP00000074885,ENSMUSP00000019266,ENSMUSP00000001008,ENSMUSP00000071130,ENSMUSP00000022722,ENSMUSP00000025263,ENSMUSP00000046199,ENSMUSP00000018610,ENSMUSP00000082548,ENSMUSP00000032239,ENSMUSP00000069850,ENSMUSP00000023611,ENSMUSP00000099888,…
3	GO:0009607	response to biotic stimulus	Biological Process	57	ENSMUSP00000122787,ENSMUSP00000039600,ENSMUSP00000054637,ENSMUSP00000056669,ENSMUSP00000019997,ENSMUSP00000099534,ENSMUSP00000031327,ENSMUSP00000074885,ENSMUSP00000139147,ENSMUSP00000022722,ENSMUSP00000016640,ENSMUSP00000046199,ENSMUSP00000025263,ENSMUSP00000018610,ENSMUSP00000082548,ENSMUSP00000032239,ENSMUSP00000069850,ENSMUSP00000023611,ENSMUSP00000099888,ENSMUSP00000028259,ENSMUSP00000099890,…
3	GO:0009628	response to abiotic stimulus	Biological Process	42	ENSMUSP00000027015,ENSMUSP00000087119,ENSMUSP00000018610,ENSMUSP00000028881,ENSMUSP00000007799,ENSMUSP00000044050,ENSMUSP00000015596,ENSMUSP00000080974,ENSMUSP00000064680,ENSMUSP00000111204,ENSMUSP00000080717,ENSMUSP00000022176,ENSMUSP00000127646,ENSMUSP00000064536,ENSMUSP00000007275,ENSMUSP00000035065,ENSMUSP00000056669,ENSMUSP00000022576,ENSMUSP00000074885,ENSMUSP00000004910,ENSMUSP00000062277,…
3	GO:0009719	response to endogenous stimulus	Biological Process	49	ENSMUSP00000034026,ENSMUSP00000145451,ENSMUSP00000023809,ENSMUSP00000086094,ENSMUSP00000112675,ENSMUSP00000029711,ENSMUSP00000051492,ENSMUSP00000087119,ENSMUSP00000018610,ENSMUSP00000080998,ENSMUSP00000025263,ENSMUSP00000020543,ENSMUSP00000069850,ENSMUSP00000047333,ENSMUSP00000007799,ENSMUSP00000058629,ENSMUSP00000111204,ENSMUSP00000035065,ENSMUSP00000089051,ENSMUSP00000028881,ENSMUSP00000089948,…
3	GO:0042221	response to chemical	Biological Process	151	ENSMUSP00000007799,ENSMUSP00000095171,ENSMUSP00000074885,ENSMUSP00000025263,ENSMUSP00000041503,ENSMUSP00000032888,ENSMUSP00000056669,ENSMUSP00000019997,ENSMUSP00000099534,ENSMUSP00000031327,ENSMUSP00000039600,ENSMUSP00000019266,ENSMUSP00000001008,ENSMUSP00000027961,ENSMUSP00000041175,ENSMUSP00000132180,ENSMUSP00000026211,ENSMUSP00000037023,ENSMUSP00000120466,ENSMUSP00000019064,ENSMUSP00000034026,…
3	GO:0043627	response to estrogen	Biological Process	5	ENSMUSP00000133360,ENSMUSP00000007317,ENSMUSP00000087119,ENSMUSP00000127646,ENSMUSP00000007799
3	GO:0051606	detection of stimulus	Biological Process	5	ENSMUSP00000024791,ENSMUSP00000149022,ENSMUSP00000150761,ENSMUSP00000143864,ENSMUSP00000025263
3	GO:0051775	response to redox state	Biological Process	1	ENSMUSP00000020964
3	GO:0072376	protein activation cascade	Biological Process	4	ENSMUSP00000023790,ENSMUSP00000028233,ENSMUSP00000000049,ENSMUSP00000141648
3	GO:0031503	protein-containing complex localization	Biological Process	4	ENSMUSP00000033282,ENSMUSP00000069004,ENSMUSP00000100863,ENSMUSP00000033560
3	GO:0033036	macromolecule localization	Biological Process	109	ENSMUSP00000033282,ENSMUSP00000069004,ENSMUSP00000025263,ENSMUSP00000137310,ENSMUSP00000004968,ENSMUSP00000027414,ENSMUSP00000007799,ENSMUSP00000100863,ENSMUSP00000084257,ENSMUSP00000099879,ENSMUSP00000062983,ENSMUSP00000042053,ENSMUSP00000032888,ENSMUSP00000029414,ENSMUSP00000091692,ENSMUSP00000002855,ENSMUSP00000027492,ENSMUSP00000133302,ENSMUSP00000034713,ENSMUSP00000074872,ENSMUSP00000095171,…
3	GO:0051234	establishment of localization	Biological Process	146	ENSMUSP00000033282,ENSMUSP00000069004,ENSMUSP00000025263,ENSMUSP00000127990,ENSMUSP00000037000,ENSMUSP00000137310,ENSMUSP00000126067,ENSMUSP00000041503,ENSMUSP00000032888,ENSMUSP00000056715,ENSMUSP00000089051,ENSMUSP00000095171,ENSMUSP00000022576,ENSMUSP00000022787,ENSMUSP00000037023,ENSMUSP00000020653,ENSMUSP00000022429,ENSMUSP00000036614,ENSMUSP00000086025,ENSMUSP00000033160,ENSMUSP00000002855,…
3	GO:0051235	maintenance of location	Biological Process	14	ENSMUSP00000002855,ENSMUSP00000133302,ENSMUSP00000020964,ENSMUSP00000002737,ENSMUSP00000080974,ENSMUSP00000112675,ENSMUSP00000001008,ENSMUSP00000026262,ENSMUSP00000007799,ENSMUSP00000025263,ENSMUSP00000028881,ENSMUSP00000037206,ENSMUSP00000126067,ENSMUSP00000144369
3	GO:0051641	cellular localization	Biological Process	77	ENSMUSP00000033282,ENSMUSP00000069004,ENSMUSP00000025263,ENSMUSP00000127990,ENSMUSP00000037000,ENSMUSP00000137310,ENSMUSP00000126067,ENSMUSP00000020653,ENSMUSP00000100863,ENSMUSP00000084257,ENSMUSP00000099879,ENSMUSP00000062983,ENSMUSP00000042053,ENSMUSP00000032888,ENSMUSP00000029414,ENSMUSP00000091692,ENSMUSP00000002855,ENSMUSP00000027492,ENSMUSP00000095171,ENSMUSP00000022429,ENSMUSP00000033160,…
3	GO:0051674	localization of cell	Biological Process	49	ENSMUSP00000109794,ENSMUSP00000064536,ENSMUSP00000039600,ENSMUSP00000019266,ENSMUSP00000001008,ENSMUSP00000083587,ENSMUSP00000054499,ENSMUSP00000000769,ENSMUSP00000000049,ENSMUSP00000015596,ENSMUSP00000099907,ENSMUSP00000028233,ENSMUSP00000101312,ENSMUSP00000017153,ENSMUSP00000019064,ENSMUSP00000087119,ENSMUSP00000022429,ENSMUSP00000019997,ENSMUSP00000085566,ENSMUSP00000031840,ENSMUSP00000025523,…
3	GO:0061842	microtubule organizing center localization	Biological Process	1	ENSMUSP00000101312
3	GO:1902579	multi-organism localization	Biological Process	1	ENSMUSP00000007799
3	GO:0051707	response to other organism	Biological Process	56	ENSMUSP00000122787,ENSMUSP00000039600,ENSMUSP00000054637,ENSMUSP00000056669,ENSMUSP00000019997,ENSMUSP00000099534,ENSMUSP00000031327,ENSMUSP00000074885,ENSMUSP00000022722,ENSMUSP00000046199,ENSMUSP00000025263,ENSMUSP00000018610,ENSMUSP00000082548,ENSMUSP00000032239,ENSMUSP00000069850,ENSMUSP00000023611,ENSMUSP00000099888,ENSMUSP00000028259,ENSMUSP00000099890,ENSMUSP00000020970,ENSMUSP00000030636,…
3	GO:0044419	interspecies interaction between organisms	Biological Process	27	ENSMUSP00000055714,ENSMUSP00000022830,ENSMUSP00000062576,ENSMUSP00000121848,ENSMUSP00000044050,ENSMUSP00000007799,ENSMUSP00000133302,ENSMUSP00000048901,ENSMUSP00000062277,ENSMUSP00000033264,ENSMUSP00000080974,ENSMUSP00000015981,ENSMUSP00000025263,ENSMUSP00000039600,ENSMUSP00000001008,ENSMUSP00000023788,ENSMUSP00000083587,ENSMUSP00000132435,ENSMUSP00000028241,ENSMUSP00000116259,ENSMUSP00000020970,…
3	GO:0051703	intraspecies interaction between organisms	Biological Process	2	ENSMUSP00000028881,ENSMUSP00000022345
3	GO:0065008	regulation of biological quality	Biological Process	123	ENSMUSP00000020931,ENSMUSP00000018985,ENSMUSP00000043088,ENSMUSP00000028881,ENSMUSP00000028882,ENSMUSP00000062576,ENSMUSP00000062277,ENSMUSP00000052465,ENSMUSP00000019997,ENSMUSP00000126067,ENSMUSP00000007799,ENSMUSP00000020964,ENSMUSP00000025263,ENSMUSP00000041503,ENSMUSP00000032888,ENSMUSP00000027053,ENSMUSP00000069851,ENSMUSP00000095171,ENSMUSP00000080974,ENSMUSP00000064536,ENSMUSP00000083204,…
3	GO:0065009	regulation of molecular function	Biological Process	93	ENSMUSP00000050374,ENSMUSP00000033282,ENSMUSP00000025263,ENSMUSP00000040307,ENSMUSP00000086459,ENSMUSP00000095171,ENSMUSP00000028881,ENSMUSP00000071715,ENSMUSP00000007799,ENSMUSP00000023832,ENSMUSP00000027015,ENSMUSP00000126067,ENSMUSP00000039604,ENSMUSP00000033721,ENSMUSP00000080717,ENSMUSP00000004949,ENSMUSP00000035061,ENSMUSP00000032228,ENSMUSP00000031840,ENSMUSP00000055714,ENSMUSP00000031327,…
3	GO:0044085	cellular component biogenesis	Biological Process	95	ENSMUSP00000023217,ENSMUSP00000001485,ENSMUSP00000069004,ENSMUSP00000026173,ENSMUSP00000045201,ENSMUSP00000147061,ENSMUSP00000033282,ENSMUSP00000022203,ENSMUSP00000035644,ENSMUSP00000116259,ENSMUSP00000086987,ENSMUSP00000112977,ENSMUSP00000020653,ENSMUSP00000116252,ENSMUSP00000137253,ENSMUSP00000109257,ENSMUSP00000131489,ENSMUSP00000052465,ENSMUSP00000027492,ENSMUSP00000112213,ENSMUSP00000051492,…
3	GO:0061687	detoxification of inorganic compound	Biological Process	1	ENSMUSP00000034214
4	GO:0007276	gamete generation	Biological Process	10	ENSMUSP00000070868,ENSMUSP00000085423,ENSMUSP00000151886,ENSMUSP00000023832,ENSMUSP00000094211,ENSMUSP00000034746,ENSMUSP00000051492,ENSMUSP00000035065,ENSMUSP00000028881,ENSMUSP00000034026
4	GO:0022900	electron transport chain	Biological Process	9	ENSMUSP00000000175,ENSMUSP00000054856,ENSMUSP00000115419,ENSMUSP00000080993,ENSMUSP00000126067,ENSMUSP00000066303,ENSMUSP00000146960,ENSMUSP00000141022,ENSMUSP00000033582
4	GO:0015980	energy derivation by oxidation of organic compounds	Biological Process	10	ENSMUSP00000083474,ENSMUSP00000050788,ENSMUSP00000026617,ENSMUSP00000000175,ENSMUSP00000054856,ENSMUSP00000115419,ENSMUSP00000080993,ENSMUSP00000126067,ENSMUSP00000066303,ENSMUSP00000041380
4	GO:0018158	protein oxidation	Biological Process	1	ENSMUSP00000041380
4	GO:0034440	lipid oxidation	Biological Process	2	ENSMUSP00000080974,ENSMUSP00000024706
4	GO:0034641	cellular nitrogen compound metabolic process	Biological Process	172	ENSMUSP00000059192,ENSMUSP00000000505,ENSMUSP00000116252,ENSMUSP00000112600,ENSMUSP00000080974,ENSMUSP00000053916,ENSMUSP00000015981,ENSMUSP00000025263,ENSMUSP00000055714,ENSMUSP00000064680,ENSMUSP00000137253,ENSMUSP00000028881,ENSMUSP00000089948,ENSMUSP00000035644,ENSMUSP00000077971,ENSMUSP00000047333,ENSMUSP00000119057,ENSMUSP00000033570,ENSMUSP00000028071,ENSMUSP00000112675,ENSMUSP00000007799,…
4	GO:0051171	regulation of nitrogen compound metabolic process	Biological Process	155	ENSMUSP00000050374,ENSMUSP00000033282,ENSMUSP00000080974,ENSMUSP00000053916,ENSMUSP00000015981,ENSMUSP00000025263,ENSMUSP00000055714,ENSMUSP00000064680,ENSMUSP00000137253,ENSMUSP00000028881,ENSMUSP00000089948,ENSMUSP00000035644,ENSMUSP00000077971,ENSMUSP00000047333,ENSMUSP00000119057,ENSMUSP00000033570,ENSMUSP00000028071,ENSMUSP00000112675,ENSMUSP00000007799,ENSMUSP00000069850,ENSMUSP00000032194,…
4	GO:0051172	negative regulation of nitrogen compound metabolic process	Biological Process	73	ENSMUSP00000080974,ENSMUSP00000053916,ENSMUSP00000015981,ENSMUSP00000025263,ENSMUSP00000055714,ENSMUSP00000064680,ENSMUSP00000137253,ENSMUSP00000028881,ENSMUSP00000089948,ENSMUSP00000035644,ENSMUSP00000077971,ENSMUSP00000047333,ENSMUSP00000119057,ENSMUSP00000033570,ENSMUSP00000028071,ENSMUSP00000112675,ENSMUSP00000007799,ENSMUSP00000069850,ENSMUSP00000032194,ENSMUSP00000103056,ENSMUSP00000088291,…
4	GO:0051173	positive regulation of nitrogen compound metabolic process	Biological Process	83	ENSMUSP00000025263,ENSMUSP00000040307,ENSMUSP00000086459,ENSMUSP00000095171,ENSMUSP00000028881,ENSMUSP00000071715,ENSMUSP00000031840,ENSMUSP00000025523,ENSMUSP00000015981,ENSMUSP00000122787,ENSMUSP00000027639,ENSMUSP00000058629,ENSMUSP00000029711,ENSMUSP00000015596,ENSMUSP00000027015,ENSMUSP00000126067,ENSMUSP00000039604,ENSMUSP00000080717,ENSMUSP00000004949,ENSMUSP00000120466,ENSMUSP00000053394,…
4	GO:0097164	ammonium ion metabolic process	Biological Process	6	ENSMUSP00000064423,ENSMUSP00000034713,ENSMUSP00000022099,ENSMUSP00000126067,ENSMUSP00000087405,ENSMUSP00000024706
4	GO:1901564	organonitrogen compound metabolic process	Biological Process	213	ENSMUSP00000050374,ENSMUSP00000033282,ENSMUSP00000025263,ENSMUSP00000028881,ENSMUSP00000039600,ENSMUSP00000069851,ENSMUSP00000001008,ENSMUSP00000086459,ENSMUSP00000051492,ENSMUSP00000040307,ENSMUSP00000095171,ENSMUSP00000071715,ENSMUSP00000007799,ENSMUSP00000062277,ENSMUSP00000033264,ENSMUSP00000094225,ENSMUSP00000004949,ENSMUSP00000082548,ENSMUSP00000037206,ENSMUSP00000109257,ENSMUSP00000022419,…
4	GO:2001057	reactive nitrogen species metabolic process	Biological Process	9	ENSMUSP00000018610,ENSMUSP00000099617,ENSMUSP00000023832,ENSMUSP00000007799,ENSMUSP00000083587,ENSMUSP00000080974,ENSMUSP00000035065,ENSMUSP00000025263,ENSMUSP00000028881
4	GO:0009894	regulation of catabolic process	Biological Process	27	ENSMUSP00000047333,ENSMUSP00000019470,ENSMUSP00000027015,ENSMUSP00000063390,ENSMUSP00000019997,ENSMUSP00000033264,ENSMUSP00000015596,ENSMUSP00000034713,ENSMUSP00000000049,ENSMUSP00000035658,ENSMUSP00000008748,ENSMUSP00000086094,ENSMUSP00000065423,ENSMUSP00000115044,ENSMUSP00000133302,ENSMUSP00000018610,ENSMUSP00000025263,ENSMUSP00000062277,ENSMUSP00000022099,ENSMUSP00000064536,ENSMUSP00000028881,…
4	GO:0009895	negative regulation of catabolic process	Biological Process	12	ENSMUSP00000019997,ENSMUSP00000035658,ENSMUSP00000086094,ENSMUSP00000065423,ENSMUSP00000018610,ENSMUSP00000025263,ENSMUSP00000028881,ENSMUSP00000008748,ENSMUSP00000033560,ENSMUSP00000023832,ENSMUSP00000043245,ENSMUSP00000126067
4	GO:0009896	positive regulation of catabolic process	Biological Process	16	ENSMUSP00000033264,ENSMUSP00000015596,ENSMUSP00000034713,ENSMUSP00000000049,ENSMUSP00000115044,ENSMUSP00000133302,ENSMUSP00000025263,ENSMUSP00000019997,ENSMUSP00000062277,ENSMUSP00000022099,ENSMUSP00000064536,ENSMUSP00000028881,ENSMUSP00000065423,ENSMUSP00000023832,ENSMUSP00000126067,ENSMUSP00000039604
4	GO:0030574	collagen catabolic process	Biological Process	2	ENSMUSP00000087119,ENSMUSP00000139147
4	GO:0044248	cellular catabolic process	Biological Process	58	ENSMUSP00000026173,ENSMUSP00000045201,ENSMUSP00000147061,ENSMUSP00000129789,ENSMUSP00000020801,ENSMUSP00000017384,ENSMUSP00000082548,ENSMUSP00000015981,ENSMUSP00000047333,ENSMUSP00000035179,ENSMUSP00000062277,ENSMUSP00000032198,ENSMUSP00000133175,ENSMUSP00000047202,ENSMUSP00000094225,ENSMUSP00000061305,ENSMUSP00000018610,ENSMUSP00000121736,ENSMUSP00000026262,ENSMUSP00000127646,ENSMUSP00000139608,…
4	GO:0044282	small molecule catabolic process	Biological Process	7	ENSMUSP00000018610,ENSMUSP00000121736,ENSMUSP00000133302,ENSMUSP00000036245,ENSMUSP00000026613,ENSMUSP00000019942,ENSMUSP00000025050
4	GO:1901575	organic substance catabolic process	Biological Process	51	ENSMUSP00000129789,ENSMUSP00000020801,ENSMUSP00000017384,ENSMUSP00000082548,ENSMUSP00000005173,ENSMUSP00000047333,ENSMUSP00000035179,ENSMUSP00000062277,ENSMUSP00000032198,ENSMUSP00000133175,ENSMUSP00000047202,ENSMUSP00000094225,ENSMUSP00000061305,ENSMUSP00000018610,ENSMUSP00000121736,ENSMUSP00000026262,ENSMUSP00000133302,ENSMUSP00000036245,ENSMUSP00000019470,ENSMUSP00000070868,ENSMUSP00000034713,…
4	GO:0009889	regulation of biosynthetic process	Biological Process	99	ENSMUSP00000080974,ENSMUSP00000053916,ENSMUSP00000015981,ENSMUSP00000025263,ENSMUSP00000055714,ENSMUSP00000064680,ENSMUSP00000137253,ENSMUSP00000028881,ENSMUSP00000089948,ENSMUSP00000035644,ENSMUSP00000077971,ENSMUSP00000047333,ENSMUSP00000119057,ENSMUSP00000033570,ENSMUSP00000028071,ENSMUSP00000112675,ENSMUSP00000007799,ENSMUSP00000069850,ENSMUSP00000032194,ENSMUSP00000103056,ENSMUSP00000088291,…
4	GO:0009890	negative regulation of biosynthetic process	Biological Process	41	ENSMUSP00000080974,ENSMUSP00000053916,ENSMUSP00000015981,ENSMUSP00000025263,ENSMUSP00000055714,ENSMUSP00000064680,ENSMUSP00000137253,ENSMUSP00000028881,ENSMUSP00000089948,ENSMUSP00000035644,ENSMUSP00000077971,ENSMUSP00000047333,ENSMUSP00000119057,ENSMUSP00000033570,ENSMUSP00000028071,ENSMUSP00000112675,ENSMUSP00000007799,ENSMUSP00000069850,ENSMUSP00000032194,ENSMUSP00000103056,ENSMUSP00000088291,…
4	GO:0009891	positive regulation of biosynthetic process	Biological Process	47	ENSMUSP00000034713,ENSMUSP00000023832,ENSMUSP00000028882,ENSMUSP00000112675,ENSMUSP00000079699,ENSMUSP00000129789,ENSMUSP00000133302,ENSMUSP00000018610,ENSMUSP00000039600,ENSMUSP00000035065,ENSMUSP00000070868,ENSMUSP00000086459,ENSMUSP00000001583,ENSMUSP00000122787,ENSMUSP00000054637,ENSMUSP00000025263,ENSMUSP00000028881,ENSMUSP00000104548,ENSMUSP00000004949,ENSMUSP00000083587,ENSMUSP00000080974,…
4	GO:0032964	collagen biosynthetic process	Biological Process	1	ENSMUSP00000015596
4	GO:0042446	hormone biosynthetic process	Biological Process	3	ENSMUSP00000027989,ENSMUSP00000025263,ENSMUSP00000028881
4	GO:0044249	cellular biosynthetic process	Biological Process	163	ENSMUSP00000059192,ENSMUSP00000000505,ENSMUSP00000116252,ENSMUSP00000112600,ENSMUSP00000080974,ENSMUSP00000053916,ENSMUSP00000015981,ENSMUSP00000025263,ENSMUSP00000055714,ENSMUSP00000064680,ENSMUSP00000137253,ENSMUSP00000028881,ENSMUSP00000089948,ENSMUSP00000035644,ENSMUSP00000077971,ENSMUSP00000047333,ENSMUSP00000119057,ENSMUSP00000033570,ENSMUSP00000028071,ENSMUSP00000112675,ENSMUSP00000007799,…
4	GO:0044283	small molecule biosynthetic process	Biological Process	31	ENSMUSP00000035065,ENSMUSP00000095171,ENSMUSP00000059977,ENSMUSP00000099916,ENSMUSP00000027053,ENSMUSP00000031103,ENSMUSP00000047333,ENSMUSP00000132590,ENSMUSP00000111204,ENSMUSP00000060462,ENSMUSP00000006557,ENSMUSP00000026220,ENSMUSP00000133302,ENSMUSP00000022176,ENSMUSP00000027989,ENSMUSP00000021676,ENSMUSP00000087405,ENSMUSP00000129704,ENSMUSP00000112675,ENSMUSP00000071130,ENSMUSP00000023832,…
4	GO:1901576	organic substance biosynthetic process	Biological Process	165	ENSMUSP00000059192,ENSMUSP00000000505,ENSMUSP00000116252,ENSMUSP00000112600,ENSMUSP00000080974,ENSMUSP00000053916,ENSMUSP00000015981,ENSMUSP00000025263,ENSMUSP00000055714,ENSMUSP00000064680,ENSMUSP00000137253,ENSMUSP00000028881,ENSMUSP00000089948,ENSMUSP00000035644,ENSMUSP00000077971,ENSMUSP00000047333,ENSMUSP00000119057,ENSMUSP00000033570,ENSMUSP00000028071,ENSMUSP00000112675,ENSMUSP00000007799,…
4	GO:1903409	reactive oxygen species biosynthetic process	Biological Process	9	ENSMUSP00000018610,ENSMUSP00000099617,ENSMUSP00000023832,ENSMUSP00000007799,ENSMUSP00000083587,ENSMUSP00000080974,ENSMUSP00000035065,ENSMUSP00000025263,ENSMUSP00000028881
4	GO:0010605	negative regulation of macromolecule metabolic process	Biological Process	78	ENSMUSP00000080974,ENSMUSP00000053916,ENSMUSP00000015981,ENSMUSP00000025263,ENSMUSP00000055714,ENSMUSP00000064680,ENSMUSP00000137253,ENSMUSP00000028881,ENSMUSP00000089948,ENSMUSP00000035644,ENSMUSP00000077971,ENSMUSP00000047333,ENSMUSP00000119057,ENSMUSP00000033570,ENSMUSP00000028071,ENSMUSP00000112675,ENSMUSP00000007799,ENSMUSP00000069850,ENSMUSP00000032194,ENSMUSP00000103056,ENSMUSP00000088291,…
4	GO:0010713	negative regulation of collagen metabolic process	Biological Process	1	ENSMUSP00000015596
4	GO:0031324	negative regulation of cellular metabolic process	Biological Process	74	ENSMUSP00000080974,ENSMUSP00000053916,ENSMUSP00000015981,ENSMUSP00000025263,ENSMUSP00000055714,ENSMUSP00000064680,ENSMUSP00000137253,ENSMUSP00000028881,ENSMUSP00000089948,ENSMUSP00000035644,ENSMUSP00000077971,ENSMUSP00000047333,ENSMUSP00000119057,ENSMUSP00000033570,ENSMUSP00000028071,ENSMUSP00000112675,ENSMUSP00000007799,ENSMUSP00000069850,ENSMUSP00000032194,ENSMUSP00000103056,ENSMUSP00000088291,…
4	GO:0045833	negative regulation of lipid metabolic process	Biological Process	4	ENSMUSP00000133302,ENSMUSP00000025263,ENSMUSP00000028881,ENSMUSP00000022099
4	GO:0051354	negative regulation of oxidoreductase activity	Biological Process	2	ENSMUSP00000126067,ENSMUSP00000007799
4	GO:0060268	negative regulation of respiratory burst	Biological Process	1	ENSMUSP00000000049
4	GO:0062014	negative regulation of small molecule metabolic process	Biological Process	3	ENSMUSP00000133302,ENSMUSP00000022419,ENSMUSP00000127716
4	GO:0120163	negative regulation of cold-induced thermogenesis	Biological Process	1	ENSMUSP00000023611
4	GO:0010604	positive regulation of macromolecule metabolic process	Biological Process	86	ENSMUSP00000025263,ENSMUSP00000040307,ENSMUSP00000086459,ENSMUSP00000095171,ENSMUSP00000028881,ENSMUSP00000071715,ENSMUSP00000126067,ENSMUSP00000031840,ENSMUSP00000025523,ENSMUSP00000015981,ENSMUSP00000122787,ENSMUSP00000027639,ENSMUSP00000058629,ENSMUSP00000029711,ENSMUSP00000015596,ENSMUSP00000027015,ENSMUSP00000039604,ENSMUSP00000080717,ENSMUSP00000004949,ENSMUSP00000087736,ENSMUSP00000054499,…
4	GO:0031325	positive regulation of cellular metabolic process	Biological Process	88	ENSMUSP00000025263,ENSMUSP00000040307,ENSMUSP00000086459,ENSMUSP00000095171,ENSMUSP00000028881,ENSMUSP00000071715,ENSMUSP00000126067,ENSMUSP00000031840,ENSMUSP00000025523,ENSMUSP00000015981,ENSMUSP00000122787,ENSMUSP00000027639,ENSMUSP00000058629,ENSMUSP00000029711,ENSMUSP00000015596,ENSMUSP00000027015,ENSMUSP00000039604,ENSMUSP00000080717,ENSMUSP00000004949,ENSMUSP00000033264,ENSMUSP00000080974,…
4	GO:0032352	positive regulation of hormone metabolic process	Biological Process	2	ENSMUSP00000025263,ENSMUSP00000028881
4	GO:0045834	positive regulation of lipid metabolic process	Biological Process	10	ENSMUSP00000034713,ENSMUSP00000023832,ENSMUSP00000133302,ENSMUSP00000028882,ENSMUSP00000000049,ENSMUSP00000035065,ENSMUSP00000070868,ENSMUSP00000028881,ENSMUSP00000025263,ENSMUSP00000080974
4	GO:0045913	positive regulation of carbohydrate metabolic process	Biological Process	3	ENSMUSP00000023832,ENSMUSP00000112675,ENSMUSP00000126067
4	GO:0051353	positive regulation of oxidoreductase activity	Biological Process	7	ENSMUSP00000133302,ENSMUSP00000087405,ENSMUSP00000025263,ENSMUSP00000028881,ENSMUSP00000023832,ENSMUSP00000126067,ENSMUSP00000022830
4	GO:0060267	positive regulation of respiratory burst	Biological Process	1	ENSMUSP00000037028
4	GO:0062013	positive regulation of small molecule metabolic process	Biological Process	9	ENSMUSP00000023832,ENSMUSP00000112675,ENSMUSP00000018610,ENSMUSP00000035065,ENSMUSP00000070868,ENSMUSP00000025263,ENSMUSP00000028881,ENSMUSP00000126067,ENSMUSP00000127716
4	GO:0120162	positive regulation of cold-induced thermogenesis	Biological Process	6	ENSMUSP00000080974,ENSMUSP00000119057,ENSMUSP00000064536,ENSMUSP00000007799,ENSMUSP00000069850,ENSMUSP00000103056
4	GO:0010712	regulation of collagen metabolic process	Biological Process	1	ENSMUSP00000015596
4	GO:0031323	regulation of cellular metabolic process	Biological Process	163	ENSMUSP00000050374,ENSMUSP00000033282,ENSMUSP00000080974,ENSMUSP00000053916,ENSMUSP00000015981,ENSMUSP00000025263,ENSMUSP00000055714,ENSMUSP00000064680,ENSMUSP00000137253,ENSMUSP00000028881,ENSMUSP00000089948,ENSMUSP00000035644,ENSMUSP00000077971,ENSMUSP00000047333,ENSMUSP00000119057,ENSMUSP00000033570,ENSMUSP00000028071,ENSMUSP00000112675,ENSMUSP00000007799,ENSMUSP00000069850,ENSMUSP00000032194,…
4	GO:0032350	regulation of hormone metabolic process	Biological Process	2	ENSMUSP00000025263,ENSMUSP00000028881
4	GO:0051341	regulation of oxidoreductase activity	Biological Process	8	ENSMUSP00000126067,ENSMUSP00000028881,ENSMUSP00000133302,ENSMUSP00000087405,ENSMUSP00000007799,ENSMUSP00000022830,ENSMUSP00000025263,ENSMUSP00000023832
4	GO:0060255	regulation of macromolecule metabolic process	Biological Process	159	ENSMUSP00000050374,ENSMUSP00000033282,ENSMUSP00000080974,ENSMUSP00000053916,ENSMUSP00000015981,ENSMUSP00000025263,ENSMUSP00000055714,ENSMUSP00000064680,ENSMUSP00000137253,ENSMUSP00000028881,ENSMUSP00000089948,ENSMUSP00000035644,ENSMUSP00000077971,ENSMUSP00000047333,ENSMUSP00000119057,ENSMUSP00000033570,ENSMUSP00000028071,ENSMUSP00000112675,ENSMUSP00000007799,ENSMUSP00000069850,ENSMUSP00000032194,…
4	GO:0060263	regulation of respiratory burst	Biological Process	2	ENSMUSP00000037028,ENSMUSP00000000049
4	GO:0062012	regulation of small molecule metabolic process	Biological Process	15	ENSMUSP00000047333,ENSMUSP00000126067,ENSMUSP00000023832,ENSMUSP00000112675,ENSMUSP00000007799,ENSMUSP00000018610,ENSMUSP00000035065,ENSMUSP00000070868,ENSMUSP00000133302,ENSMUSP00000025263,ENSMUSP00000028881,ENSMUSP00000018645,ENSMUSP00000034713,ENSMUSP00000022419,ENSMUSP00000127716
4	GO:0080090	regulation of primary metabolic process	Biological Process	158	ENSMUSP00000050374,ENSMUSP00000033282,ENSMUSP00000080974,ENSMUSP00000053916,ENSMUSP00000015981,ENSMUSP00000025263,ENSMUSP00000055714,ENSMUSP00000064680,ENSMUSP00000137253,ENSMUSP00000028881,ENSMUSP00000089948,ENSMUSP00000035644,ENSMUSP00000077971,ENSMUSP00000047333,ENSMUSP00000119057,ENSMUSP00000033570,ENSMUSP00000028071,ENSMUSP00000112675,ENSMUSP00000007799,ENSMUSP00000069850,ENSMUSP00000032194,…
4	GO:0120161	regulation of cold-induced thermogenesis	Biological Process	7	ENSMUSP00000080974,ENSMUSP00000119057,ENSMUSP00000064536,ENSMUSP00000007799,ENSMUSP00000069850,ENSMUSP00000103056,ENSMUSP00000023611
4	GO:0043414	macromolecule methylation	Biological Process	7	ENSMUSP00000119057,ENSMUSP00000028071,ENSMUSP00000024887,ENSMUSP00000133279,ENSMUSP00000022203,ENSMUSP00000089948,ENSMUSP00000025444
4	GO:0034754	cellular hormone metabolic process	Biological Process	2	ENSMUSP00000027053,ENSMUSP00000027989
4	GO:0006790	sulfur compound metabolic process	Biological Process	5	ENSMUSP00000099916,ENSMUSP00000126067,ENSMUSP00000129704,ENSMUSP00000003759,ENSMUSP00000006557
4	GO:0006081	cellular aldehyde metabolic process	Biological Process	1	ENSMUSP00000027053
4	GO:0006082	organic acid metabolic process	Biological Process	39	ENSMUSP00000035065,ENSMUSP00000095171,ENSMUSP00000059977,ENSMUSP00000099916,ENSMUSP00000080974,ENSMUSP00000025500,ENSMUSP00000027053,ENSMUSP00000154853,ENSMUSP00000031103,ENSMUSP00000000175,ENSMUSP00000104957,ENSMUSP00000047333,ENSMUSP00000102393,ENSMUSP00000111204,ENSMUSP00000018610,ENSMUSP00000121736,ENSMUSP00000126067,ENSMUSP00000060462,ENSMUSP00000034026,ENSMUSP00000006557,ENSMUSP00000002737,…
4	GO:0006091	generation of precursor metabolites and energy	Biological Process	16	ENSMUSP00000083474,ENSMUSP00000050788,ENSMUSP00000026617,ENSMUSP00000000175,ENSMUSP00000047333,ENSMUSP00000080993,ENSMUSP00000054856,ENSMUSP00000115419,ENSMUSP00000146960,ENSMUSP00000141022,ENSMUSP00000033582,ENSMUSP00000126067,ENSMUSP00000066303,ENSMUSP00000018645,ENSMUSP00000022419,ENSMUSP00000041380
4	GO:0006413	translational initiation	Biological Process	4	ENSMUSP00000133175,ENSMUSP00000025263,ENSMUSP00000053403,ENSMUSP00000004910
4	GO:0006575	cellular modified amino acid metabolic process	Biological Process	5	ENSMUSP00000099916,ENSMUSP00000021990,ENSMUSP00000129704,ENSMUSP00000087405,ENSMUSP00000004968
4	GO:0006725	cellular aromatic compound metabolic process	Biological Process	147	ENSMUSP00000059192,ENSMUSP00000000505,ENSMUSP00000116252,ENSMUSP00000112600,ENSMUSP00000080974,ENSMUSP00000053916,ENSMUSP00000015981,ENSMUSP00000025263,ENSMUSP00000055714,ENSMUSP00000064680,ENSMUSP00000137253,ENSMUSP00000028881,ENSMUSP00000089948,ENSMUSP00000035644,ENSMUSP00000077971,ENSMUSP00000047333,ENSMUSP00000119057,ENSMUSP00000033570,ENSMUSP00000028071,ENSMUSP00000112675,ENSMUSP00000007799,…
4	GO:0006730	one-carbon metabolic process	Biological Process	1	ENSMUSP00000110897
4	GO:0006793	phosphorus metabolic process	Biological Process	111	ENSMUSP00000050374,ENSMUSP00000033282,ENSMUSP00000025263,ENSMUSP00000028881,ENSMUSP00000039600,ENSMUSP00000069851,ENSMUSP00000001008,ENSMUSP00000086459,ENSMUSP00000051492,ENSMUSP00000040307,ENSMUSP00000095171,ENSMUSP00000071715,ENSMUSP00000007799,ENSMUSP00000054499,ENSMUSP00000037206,ENSMUSP00000127716,ENSMUSP00000126067,ENSMUSP00000023832,ENSMUSP00000027367,ENSMUSP00000065719,ENSMUSP00000015596,…
4	GO:0072593	reactive oxygen species metabolic process	Biological Process	16	ENSMUSP00000018610,ENSMUSP00000099617,ENSMUSP00000080974,ENSMUSP00000127716,ENSMUSP00000022830,ENSMUSP00000015596,ENSMUSP00000031327,ENSMUSP00000023832,ENSMUSP00000007799,ENSMUSP00000083587,ENSMUSP00000035065,ENSMUSP00000025263,ENSMUSP00000028881,ENSMUSP00000022429,ENSMUSP00000126067,ENSMUSP00000087405
4	GO:0006805	xenobiotic metabolic process	Biological Process	3	ENSMUSP00000041175,ENSMUSP00000132180,ENSMUSP00000026211
4	GO:0017144	drug metabolic process	Biological Process	30	ENSMUSP00000154853,ENSMUSP00000000175,ENSMUSP00000047333,ENSMUSP00000080993,ENSMUSP00000054856,ENSMUSP00000115419,ENSMUSP00000087405,ENSMUSP00000016396,ENSMUSP00000018610,ENSMUSP00000099617,ENSMUSP00000030583,ENSMUSP00000129704,ENSMUSP00000126067,ENSMUSP00000041175,ENSMUSP00000132180,ENSMUSP00000026211,ENSMUSP00000066303,ENSMUSP00000023832,ENSMUSP00000007799,ENSMUSP00000083587,ENSMUSP00000080974,…
4	GO:0042133	neurotransmitter metabolic process	Biological Process	11	ENSMUSP00000043088,ENSMUSP00000018610,ENSMUSP00000099617,ENSMUSP00000023832,ENSMUSP00000007799,ENSMUSP00000083587,ENSMUSP00000080974,ENSMUSP00000035065,ENSMUSP00000025263,ENSMUSP00000028881,ENSMUSP00000087405
4	GO:0042180	cellular ketone metabolic process	Biological Process	6	ENSMUSP00000022176,ENSMUSP00000126067,ENSMUSP00000007799,ENSMUSP00000035065,ENSMUSP00000070868,ENSMUSP00000023832
4	GO:0043094	cellular metabolic compound salvage	Biological Process	1	ENSMUSP00000129704
4	GO:0044107	cellular alcohol metabolic process	Biological Process	1	ENSMUSP00000021676
4	GO:0044255	cellular lipid metabolic process	Biological Process	40	ENSMUSP00000035065,ENSMUSP00000095171,ENSMUSP00000059977,ENSMUSP00000099916,ENSMUSP00000080974,ENSMUSP00000025500,ENSMUSP00000027053,ENSMUSP00000031741,ENSMUSP00000033643,ENSMUSP00000138885,ENSMUSP00000126067,ENSMUSP00000060462,ENSMUSP00000034026,ENSMUSP00000006557,ENSMUSP00000002737,ENSMUSP00000026220,ENSMUSP00000133302,ENSMUSP00000007799,ENSMUSP00000000049,ENSMUSP00000022099,ENSMUSP00000065719,…
4	GO:0044260	cellular macromolecule metabolic process	Biological Process	221	ENSMUSP00000059192,ENSMUSP00000000505,ENSMUSP00000116252,ENSMUSP00000112600,ENSMUSP00000050374,ENSMUSP00000033282,ENSMUSP00000080974,ENSMUSP00000053916,ENSMUSP00000015981,ENSMUSP00000025263,ENSMUSP00000055714,ENSMUSP00000064680,ENSMUSP00000137253,ENSMUSP00000028881,ENSMUSP00000089948,ENSMUSP00000035644,ENSMUSP00000077971,ENSMUSP00000047333,ENSMUSP00000119057,ENSMUSP00000033570,ENSMUSP00000028071,…
4	GO:0044262	cellular carbohydrate metabolic process	Biological Process	7	ENSMUSP00000083474,ENSMUSP00000050788,ENSMUSP00000026617,ENSMUSP00000023832,ENSMUSP00000112675,ENSMUSP00000026613,ENSMUSP00000126067
4	GO:0046483	heterocycle metabolic process	Biological Process	148	ENSMUSP00000059192,ENSMUSP00000000505,ENSMUSP00000116252,ENSMUSP00000112600,ENSMUSP00000080974,ENSMUSP00000053916,ENSMUSP00000015981,ENSMUSP00000025263,ENSMUSP00000055714,ENSMUSP00000064680,ENSMUSP00000137253,ENSMUSP00000028881,ENSMUSP00000089948,ENSMUSP00000035644,ENSMUSP00000077971,ENSMUSP00000047333,ENSMUSP00000119057,ENSMUSP00000033570,ENSMUSP00000028071,ENSMUSP00000112675,ENSMUSP00000007799,…
4	GO:0051186	cofactor metabolic process	Biological Process	13	ENSMUSP00000104957,ENSMUSP00000047333,ENSMUSP00000099916,ENSMUSP00000087405,ENSMUSP00000022176,ENSMUSP00000096670,ENSMUSP00000126067,ENSMUSP00000064330,ENSMUSP00000003759,ENSMUSP00000129704,ENSMUSP00000023832,ENSMUSP00000006557,ENSMUSP00000018645
4	GO:0005975	carbohydrate metabolic process	Biological Process	12	ENSMUSP00000083474,ENSMUSP00000050788,ENSMUSP00000026617,ENSMUSP00000025263,ENSMUSP00000047333,ENSMUSP00000023832,ENSMUSP00000112675,ENSMUSP00000026613,ENSMUSP00000126067,ENSMUSP00000018645,ENSMUSP00000026262,ENSMUSP00000080717
4	GO:0006099	tricarboxylic acid cycle	Biological Process	1	ENSMUSP00000000175
4	GO:0006139	nucleobase-containing compound metabolic process	Biological Process	146	ENSMUSP00000059192,ENSMUSP00000000505,ENSMUSP00000116252,ENSMUSP00000112600,ENSMUSP00000080974,ENSMUSP00000053916,ENSMUSP00000015981,ENSMUSP00000025263,ENSMUSP00000055714,ENSMUSP00000064680,ENSMUSP00000137253,ENSMUSP00000028881,ENSMUSP00000089948,ENSMUSP00000035644,ENSMUSP00000077971,ENSMUSP00000047333,ENSMUSP00000119057,ENSMUSP00000033570,ENSMUSP00000028071,ENSMUSP00000112675,ENSMUSP00000007799,…
4	GO:0006520	cellular amino acid metabolic process	Biological Process	6	ENSMUSP00000102393,ENSMUSP00000018610,ENSMUSP00000111204,ENSMUSP00000121736,ENSMUSP00000129704,ENSMUSP00000004968
4	GO:0006629	lipid metabolic process	Biological Process	51	ENSMUSP00000035065,ENSMUSP00000095171,ENSMUSP00000059977,ENSMUSP00000099916,ENSMUSP00000080974,ENSMUSP00000025500,ENSMUSP00000027053,ENSMUSP00000031741,ENSMUSP00000033643,ENSMUSP00000138885,ENSMUSP00000126067,ENSMUSP00000060462,ENSMUSP00000034026,ENSMUSP00000006557,ENSMUSP00000002737,ENSMUSP00000026220,ENSMUSP00000133302,ENSMUSP00000007799,ENSMUSP00000000049,ENSMUSP00000022099,ENSMUSP00000065719,…
4	GO:0019538	protein metabolic process	Biological Process	190	ENSMUSP00000050374,ENSMUSP00000033282,ENSMUSP00000025263,ENSMUSP00000028881,ENSMUSP00000039600,ENSMUSP00000069851,ENSMUSP00000001008,ENSMUSP00000086459,ENSMUSP00000051492,ENSMUSP00000040307,ENSMUSP00000095171,ENSMUSP00000071715,ENSMUSP00000007799,ENSMUSP00000062277,ENSMUSP00000033264,ENSMUSP00000094225,ENSMUSP00000004949,ENSMUSP00000082548,ENSMUSP00000037206,ENSMUSP00000109257,ENSMUSP00000022419,…
4	GO:0005996	monosaccharide metabolic process	Biological Process	3	ENSMUSP00000025263,ENSMUSP00000023832,ENSMUSP00000112675
4	GO:0006066	alcohol metabolic process	Biological Process	14	ENSMUSP00000064423,ENSMUSP00000133302,ENSMUSP00000022176,ENSMUSP00000027989,ENSMUSP00000021676,ENSMUSP00000036245,ENSMUSP00000087405,ENSMUSP00000034713,ENSMUSP00000069851,ENSMUSP00000027053,ENSMUSP00000025263,ENSMUSP00000028881,ENSMUSP00000126067,ENSMUSP00000025050
4	GO:0006766	vitamin metabolic process	Biological Process	3	ENSMUSP00000023832,ENSMUSP00000025263,ENSMUSP00000028881
4	GO:0018904	ether metabolic process	Biological Process	1	ENSMUSP00000010451
4	GO:0055086	nucleobase-containing small molecule metabolic process	Biological Process	23	ENSMUSP00000031103,ENSMUSP00000047333,ENSMUSP00000080993,ENSMUSP00000000175,ENSMUSP00000054856,ENSMUSP00000115419,ENSMUSP00000031542,ENSMUSP00000132590,ENSMUSP00000030583,ENSMUSP00000016396,ENSMUSP00000126067,ENSMUSP00000035179,ENSMUSP00000022176,ENSMUSP00000064330,ENSMUSP00000129704,ENSMUSP00000018610,ENSMUSP00000006557,ENSMUSP00000066303,ENSMUSP00000026972,ENSMUSP00000018645,ENSMUSP00000022419,…
4	GO:0043413	macromolecule glycosylation	Biological Process	5	ENSMUSP00000034458,ENSMUSP00000154853,ENSMUSP00000036240,ENSMUSP00000033643,ENSMUSP00000004968
4	GO:0097502	mannosylation	Biological Process	1	ENSMUSP00000138885
4	GO:0080111	DNA demethylation	Biological Process	1	ENSMUSP00000133279
4	GO:0019637	organophosphate metabolic process	Biological Process	35	ENSMUSP00000047333,ENSMUSP00000080993,ENSMUSP00000000175,ENSMUSP00000054856,ENSMUSP00000115419,ENSMUSP00000031542,ENSMUSP00000132590,ENSMUSP00000030583,ENSMUSP00000138885,ENSMUSP00000126067,ENSMUSP00000022099,ENSMUSP00000065719,ENSMUSP00000064423,ENSMUSP00000021990,ENSMUSP00000016396,ENSMUSP00000096670,ENSMUSP00000035179,ENSMUSP00000070868,ENSMUSP00000034713,ENSMUSP00000022176,ENSMUSP00000064330,…
4	GO:0035383	thioester metabolic process	Biological Process	2	ENSMUSP00000126067,ENSMUSP00000006557
4	GO:0043170	macromolecule metabolic process	Biological Process	259	ENSMUSP00000059192,ENSMUSP00000000505,ENSMUSP00000116252,ENSMUSP00000112600,ENSMUSP00000050374,ENSMUSP00000033282,ENSMUSP00000080974,ENSMUSP00000053916,ENSMUSP00000015981,ENSMUSP00000025263,ENSMUSP00000055714,ENSMUSP00000064680,ENSMUSP00000137253,ENSMUSP00000028881,ENSMUSP00000089948,ENSMUSP00000035644,ENSMUSP00000077971,ENSMUSP00000047333,ENSMUSP00000119057,ENSMUSP00000033570,ENSMUSP00000028071,…
4	GO:0046500	S-adenosylmethionine metabolic process	Biological Process	1	ENSMUSP00000129704
4	GO:1901135	carbohydrate derivative metabolic process	Biological Process	34	ENSMUSP00000026262,ENSMUSP00000031103,ENSMUSP00000005173,ENSMUSP00000154853,ENSMUSP00000047333,ENSMUSP00000080993,ENSMUSP00000000175,ENSMUSP00000054856,ENSMUSP00000115419,ENSMUSP00000030583,ENSMUSP00000132590,ENSMUSP00000034458,ENSMUSP00000036240,ENSMUSP00000033643,ENSMUSP00000004968,ENSMUSP00000138885,ENSMUSP00000016396,ENSMUSP00000126067,ENSMUSP00000022176,ENSMUSP00000064330,ENSMUSP00000129704,…
4	GO:1901360	organic cyclic compound metabolic process	Biological Process	154	ENSMUSP00000059192,ENSMUSP00000000505,ENSMUSP00000116252,ENSMUSP00000112600,ENSMUSP00000080974,ENSMUSP00000053916,ENSMUSP00000015981,ENSMUSP00000025263,ENSMUSP00000055714,ENSMUSP00000064680,ENSMUSP00000137253,ENSMUSP00000028881,ENSMUSP00000089948,ENSMUSP00000035644,ENSMUSP00000077971,ENSMUSP00000047333,ENSMUSP00000119057,ENSMUSP00000033570,ENSMUSP00000028071,ENSMUSP00000112675,ENSMUSP00000007799,…
4	GO:1901568	fatty acid derivative metabolic process	Biological Process	11	ENSMUSP00000035065,ENSMUSP00000095171,ENSMUSP00000059977,ENSMUSP00000099916,ENSMUSP00000071130,ENSMUSP00000034026,ENSMUSP00000043088,ENSMUSP00000070868,ENSMUSP00000041175,ENSMUSP00000026211,ENSMUSP00000006557
4	GO:1901615	organic hydroxy compound metabolic process	Biological Process	14	ENSMUSP00000064423,ENSMUSP00000133302,ENSMUSP00000022176,ENSMUSP00000027989,ENSMUSP00000021676,ENSMUSP00000036245,ENSMUSP00000087405,ENSMUSP00000034713,ENSMUSP00000069851,ENSMUSP00000126067,ENSMUSP00000027053,ENSMUSP00000025263,ENSMUSP00000028881,ENSMUSP00000025050
4	GO:0106106	cold-induced thermogenesis	Biological Process	7	ENSMUSP00000080974,ENSMUSP00000119057,ENSMUSP00000064536,ENSMUSP00000007799,ENSMUSP00000069850,ENSMUSP00000103056,ENSMUSP00000023611
4	GO:0001910	regulation of leukocyte mediated cytotoxicity	Biological Process	6	ENSMUSP00000022830,ENSMUSP00000015596,ENSMUSP00000099534,ENSMUSP00000131297,ENSMUSP00000032260,ENSMUSP00000031327
4	GO:0001911	negative regulation of leukocyte mediated cytotoxicity	Biological Process	1	ENSMUSP00000032260
4	GO:0001912	positive regulation of leukocyte mediated cytotoxicity	Biological Process	3	ENSMUSP00000099534,ENSMUSP00000131297,ENSMUSP00000031327
4	GO:0001913	T cell mediated cytotoxicity	Biological Process	4	ENSMUSP00000022830,ENSMUSP00000015596,ENSMUSP00000099534,ENSMUSP00000131297
4	GO:0042267	natural killer cell mediated cytotoxicity	Biological Process	1	ENSMUSP00000032260
4	GO:0070942	neutrophil mediated cytotoxicity	Biological Process	1	ENSMUSP00000031327
4	GO:0051709	regulation of killing of cells of other organism	Biological Process	2	ENSMUSP00000018610,ENSMUSP00000031327
4	GO:0051712	positive regulation of killing of cells of other organism	Biological Process	2	ENSMUSP00000031327,ENSMUSP00000018610
4	GO:0051883	killing of cells in other organism involved in symbiotic interaction	Biological Process	1	ENSMUSP00000031327
4	GO:0001780	neutrophil homeostasis	Biological Process	1	ENSMUSP00000069851
4	GO:0002260	lymphocyte homeostasis	Biological Process	3	ENSMUSP00000019997,ENSMUSP00000095171,ENSMUSP00000022830
4	GO:0002263	cell activation involved in immune response	Biological Process	11	ENSMUSP00000083587,ENSMUSP00000032239,ENSMUSP00000122787,ENSMUSP00000019997,ENSMUSP00000022124,ENSMUSP00000089051,ENSMUSP00000001008,ENSMUSP00000054637,ENSMUSP00000104548,ENSMUSP00000103056,ENSMUSP00000110102
4	GO:0002432	granuloma formation	Biological Process	1	ENSMUSP00000019997
4	GO:0002443	leukocyte mediated immunity	Biological Process	21	ENSMUSP00000122787,ENSMUSP00000022830,ENSMUSP00000015596,ENSMUSP00000099534,ENSMUSP00000131297,ENSMUSP00000002855,ENSMUSP00000074471,ENSMUSP00000083587,ENSMUSP00000044050,ENSMUSP00000033427,ENSMUSP00000040307,ENSMUSP00000004949,ENSMUSP00000025263,ENSMUSP00000028233,ENSMUSP00000095171,ENSMUSP00000032260,ENSMUSP00000089051,ENSMUSP00000001008,ENSMUSP00000031327,ENSMUSP00000020970,ENSMUSP00000028881
4	GO:0002697	regulation of immune effector process	Biological Process	24	ENSMUSP00000122787,ENSMUSP00000022830,ENSMUSP00000015596,ENSMUSP00000099534,ENSMUSP00000131297,ENSMUSP00000039600,ENSMUSP00000054637,ENSMUSP00000019997,ENSMUSP00000033427,ENSMUSP00000044050,ENSMUSP00000040307,ENSMUSP00000004949,ENSMUSP00000025263,ENSMUSP00000032260,ENSMUSP00000089051,ENSMUSP00000104548,ENSMUSP00000039604,ENSMUSP00000028881,ENSMUSP00000080974,ENSMUSP00000095171,ENSMUSP00000031327,…
4	GO:0002698	negative regulation of immune effector process	Biological Process	7	ENSMUSP00000122787,ENSMUSP00000019997,ENSMUSP00000025263,ENSMUSP00000032260,ENSMUSP00000104548,ENSMUSP00000039604,ENSMUSP00000103056
4	GO:0002699	positive regulation of immune effector process	Biological Process	14	ENSMUSP00000099534,ENSMUSP00000131297,ENSMUSP00000033427,ENSMUSP00000040307,ENSMUSP00000004949,ENSMUSP00000025263,ENSMUSP00000089051,ENSMUSP00000104548,ENSMUSP00000080974,ENSMUSP00000095171,ENSMUSP00000031327,ENSMUSP00000110102,ENSMUSP00000020970,ENSMUSP00000028881
4	GO:0006956	complement activation	Biological Process	2	ENSMUSP00000023790,ENSMUSP00000028233
4	GO:0043299	leukocyte degranulation	Biological Process	2	ENSMUSP00000089051,ENSMUSP00000001008
4	GO:0051607	defense response to virus	Biological Process	14	ENSMUSP00000039600,ENSMUSP00000054637,ENSMUSP00000028259,ENSMUSP00000122787,ENSMUSP00000039604,ENSMUSP00000028881,ENSMUSP00000033053,ENSMUSP00000099888,ENSMUSP00000020970,ENSMUSP00000093816,ENSMUSP00000082548,ENSMUSP00000023693,ENSMUSP00000031542,ENSMUSP00000104548
4	GO:0002218	activation of innate immune response	Biological Process	10	ENSMUSP00000080974,ENSMUSP00000104548,ENSMUSP00000025263,ENSMUSP00000019997,ENSMUSP00000007799,ENSMUSP00000056669,ENSMUSP00000142428,ENSMUSP00000020970,ENSMUSP00000028259,ENSMUSP00000006625
4	GO:0002757	immune response-activating signal transduction	Biological Process	13	ENSMUSP00000080974,ENSMUSP00000110102,ENSMUSP00000004910,ENSMUSP00000004949,ENSMUSP00000104548,ENSMUSP00000025263,ENSMUSP00000019997,ENSMUSP00000007799,ENSMUSP00000056669,ENSMUSP00000142428,ENSMUSP00000020970,ENSMUSP00000028259,ENSMUSP00000112675
4	GO:0034101	erythrocyte homeostasis	Biological Process	6	ENSMUSP00000082777,ENSMUSP00000112675,ENSMUSP00000047333,ENSMUSP00000099534,ENSMUSP00000082548,ENSMUSP00000090897
4	GO:0002367	cytokine production involved in immune response	Biological Process	10	ENSMUSP00000002855,ENSMUSP00000099534,ENSMUSP00000033427,ENSMUSP00000040307,ENSMUSP00000004949,ENSMUSP00000025263,ENSMUSP00000080974,ENSMUSP00000095171,ENSMUSP00000020970,ENSMUSP00000028881
4	GO:0002377	immunoglobulin production	Biological Process	5	ENSMUSP00000034458,ENSMUSP00000019997,ENSMUSP00000033427,ENSMUSP00000025263,ENSMUSP00000004949
4	GO:0002700	regulation of production of molecular mediator of immune response	Biological Process	10	ENSMUSP00000019997,ENSMUSP00000033427,ENSMUSP00000099534,ENSMUSP00000040307,ENSMUSP00000004949,ENSMUSP00000025263,ENSMUSP00000080974,ENSMUSP00000095171,ENSMUSP00000020970,ENSMUSP00000028881
4	GO:0002701	negative regulation of production of molecular mediator of immune response	Biological Process	1	ENSMUSP00000025263
4	GO:0002702	positive regulation of production of molecular mediator of immune response	Biological Process	8	ENSMUSP00000033427,ENSMUSP00000099534,ENSMUSP00000040307,ENSMUSP00000004949,ENSMUSP00000080974,ENSMUSP00000095171,ENSMUSP00000020970,ENSMUSP00000028881
4	GO:0002461	tolerance induction dependent upon immune response	Biological Process	1	ENSMUSP00000016640
4	GO:0002643	regulation of tolerance induction	Biological Process	1	ENSMUSP00000016640
4	GO:0002645	positive regulation of tolerance induction	Biological Process	1	ENSMUSP00000016640
4	GO:0072573	tolerance induction to lipopolysaccharide	Biological Process	2	ENSMUSP00000022722,ENSMUSP00000019997
4	GO:0048534	hematopoietic or lymphoid organ development	Biological Process	41	ENSMUSP00000103056,ENSMUSP00000067002,ENSMUSP00000148145,ENSMUSP00000032239,ENSMUSP00000122787,ENSMUSP00000019997,ENSMUSP00000022830,ENSMUSP00000025523,ENSMUSP00000121848,ENSMUSP00000033749,ENSMUSP00000047333,ENSMUSP00000112675,ENSMUSP00000002855,ENSMUSP00000069851,ENSMUSP00000082777,ENSMUSP00000025263,ENSMUSP00000024791,ENSMUSP00000064680,ENSMUSP00000004949,ENSMUSP00000104548,ENSMUSP00000099534,…
4	GO:0002577	regulation of antigen processing and presentation	Biological Process	2	ENSMUSP00000024791,ENSMUSP00000095171
4	GO:0002685	regulation of leukocyte migration	Biological Process	14	ENSMUSP00000083587,ENSMUSP00000039600,ENSMUSP00000028233,ENSMUSP00000037028,ENSMUSP00000142428,ENSMUSP00000095171,ENSMUSP00000028881,ENSMUSP00000024706,ENSMUSP00000028882,ENSMUSP00000087119,ENSMUSP00000122787,ENSMUSP00000022830,ENSMUSP00000021970,ENSMUSP00000001008
4	GO:0002694	regulation of leukocyte activation	Biological Process	29	ENSMUSP00000095171,ENSMUSP00000033427,ENSMUSP00000028071,ENSMUSP00000016640,ENSMUSP00000122787,ENSMUSP00000007799,ENSMUSP00000044050,ENSMUSP00000104548,ENSMUSP00000028881,ENSMUSP00000039600,ENSMUSP00000004949,ENSMUSP00000015596,ENSMUSP00000054637,ENSMUSP00000031840,ENSMUSP00000017153,ENSMUSP00000069850,ENSMUSP00000126067,ENSMUSP00000089051,ENSMUSP00000103056,ENSMUSP00000015540,ENSMUSP00000110232,…
4	GO:0002905	regulation of mature B cell apoptotic process	Biological Process	1	ENSMUSP00000095171
4	GO:0033029	regulation of neutrophil apoptotic process	Biological Process	1	ENSMUSP00000069851
4	GO:0050776	regulation of immune response	Biological Process	40	ENSMUSP00000122787,ENSMUSP00000023790,ENSMUSP00000022830,ENSMUSP00000015596,ENSMUSP00000099534,ENSMUSP00000131297,ENSMUSP00000006625,ENSMUSP00000080974,ENSMUSP00000019997,ENSMUSP00000044050,ENSMUSP00000033427,ENSMUSP00000040307,ENSMUSP00000004949,ENSMUSP00000025263,ENSMUSP00000022722,ENSMUSP00000104548,ENSMUSP00000109877,ENSMUSP00000095171,ENSMUSP00000016640,ENSMUSP00000028233,ENSMUSP00000110102,…
4	GO:0070235	regulation of activation-induced cell death of T cells	Biological Process	1	ENSMUSP00000022830
4	GO:1903706	regulation of hemopoiesis	Biological Process	25	ENSMUSP00000104548,ENSMUSP00000028881,ENSMUSP00000028071,ENSMUSP00000103056,ENSMUSP00000033427,ENSMUSP00000015540,ENSMUSP00000110232,ENSMUSP00000087119,ENSMUSP00000095171,ENSMUSP00000054637,ENSMUSP00000069851,ENSMUSP00000099534,ENSMUSP00000082548,ENSMUSP00000112675,ENSMUSP00000025263,ENSMUSP00000047333,ENSMUSP00000069850,ENSMUSP00000032260,ENSMUSP00000001008,ENSMUSP00000025523,ENSMUSP00000039600,…
4	GO:0002686	negative regulation of leukocyte migration	Biological Process	1	ENSMUSP00000028233
4	GO:0002695	negative regulation of leukocyte activation	Biological Process	13	ENSMUSP00000031840,ENSMUSP00000016640,ENSMUSP00000122787,ENSMUSP00000017153,ENSMUSP00000069850,ENSMUSP00000103056,ENSMUSP00000110232,ENSMUSP00000095171,ENSMUSP00000104548,ENSMUSP00000019997,ENSMUSP00000109877,ENSMUSP00000112675,ENSMUSP00000034713
4	GO:0002906	negative regulation of mature B cell apoptotic process	Biological Process	1	ENSMUSP00000095171
4	GO:0033030	negative regulation of neutrophil apoptotic process	Biological Process	1	ENSMUSP00000069851
4	GO:0034122	negative regulation of toll-like receptor signaling pathway	Biological Process	1	ENSMUSP00000019997
4	GO:0050777	negative regulation of immune response	Biological Process	10	ENSMUSP00000122787,ENSMUSP00000025263,ENSMUSP00000109877,ENSMUSP00000032260,ENSMUSP00000104548,ENSMUSP00000019997,ENSMUSP00000039604,ENSMUSP00000037657,ENSMUSP00000112675,ENSMUSP00000103056
4	GO:0050858	negative regulation of antigen receptor-mediated signaling pathway	Biological Process	1	ENSMUSP00000112675
4	GO:0070425	negative regulation of nucleotide-binding oligomerization domain containing signaling pathway	Biological Process	1	ENSMUSP00000019997
4	GO:1903707	negative regulation of hemopoiesis	Biological Process	8	ENSMUSP00000103056,ENSMUSP00000110232,ENSMUSP00000095171,ENSMUSP00000104548,ENSMUSP00000069851,ENSMUSP00000112675,ENSMUSP00000032260,ENSMUSP00000001008
4	GO:0002579	positive regulation of antigen processing and presentation	Biological Process	2	ENSMUSP00000024791,ENSMUSP00000095171
4	GO:0002687	positive regulation of leukocyte migration	Biological Process	12	ENSMUSP00000083587,ENSMUSP00000039600,ENSMUSP00000142428,ENSMUSP00000095171,ENSMUSP00000028881,ENSMUSP00000037028,ENSMUSP00000024706,ENSMUSP00000028882,ENSMUSP00000087119,ENSMUSP00000122787,ENSMUSP00000021970,ENSMUSP00000001008
4	GO:0002696	positive regulation of leukocyte activation	Biological Process	18	ENSMUSP00000095171,ENSMUSP00000033427,ENSMUSP00000028071,ENSMUSP00000016640,ENSMUSP00000122787,ENSMUSP00000007799,ENSMUSP00000044050,ENSMUSP00000104548,ENSMUSP00000028881,ENSMUSP00000039600,ENSMUSP00000004949,ENSMUSP00000015596,ENSMUSP00000089051,ENSMUSP00000015540,ENSMUSP00000103056,ENSMUSP00000087119,ENSMUSP00000069851,ENSMUSP00000110102
4	GO:0050778	positive regulation of immune response	Biological Process	26	ENSMUSP00000023790,ENSMUSP00000099534,ENSMUSP00000131297,ENSMUSP00000006625,ENSMUSP00000080974,ENSMUSP00000033427,ENSMUSP00000040307,ENSMUSP00000004949,ENSMUSP00000022722,ENSMUSP00000095171,ENSMUSP00000016640,ENSMUSP00000025263,ENSMUSP00000028233,ENSMUSP00000110102,ENSMUSP00000004910,ENSMUSP00000104548,ENSMUSP00000019997,ENSMUSP00000007799,ENSMUSP00000056669,ENSMUSP00000142428,ENSMUSP00000020970,…
4	GO:1903708	positive regulation of hemopoiesis	Biological Process	18	ENSMUSP00000104548,ENSMUSP00000028881,ENSMUSP00000028071,ENSMUSP00000033427,ENSMUSP00000015540,ENSMUSP00000103056,ENSMUSP00000087119,ENSMUSP00000095171,ENSMUSP00000082548,ENSMUSP00000025523,ENSMUSP00000025263,ENSMUSP00000039600,ENSMUSP00000004949,ENSMUSP00000001008,ENSMUSP00000069851,ENSMUSP00000031327,ENSMUSP00000110102,ENSMUSP00000015596
4	GO:0002250	adaptive immune response	Biological Process	24	ENSMUSP00000122787,ENSMUSP00000022830,ENSMUSP00000015596,ENSMUSP00000099534,ENSMUSP00000131297,ENSMUSP00000002855,ENSMUSP00000083587,ENSMUSP00000019997,ENSMUSP00000044050,ENSMUSP00000033427,ENSMUSP00000040307,ENSMUSP00000004949,ENSMUSP00000104548,ENSMUSP00000109877,ENSMUSP00000095171,ENSMUSP00000016640,ENSMUSP00000025263,ENSMUSP00000028233,ENSMUSP00000054637,ENSMUSP00000103056,ENSMUSP00000110102,…
4	GO:0002251	organ or tissue specific immune response	Biological Process	1	ENSMUSP00000088291
4	GO:0002418	immune response to tumor cell	Biological Process	2	ENSMUSP00000016640,ENSMUSP00000139147
4	GO:0002437	inflammatory response to antigenic stimulus	Biological Process	4	ENSMUSP00000122787,ENSMUSP00000083587,ENSMUSP00000025263,ENSMUSP00000028881
4	GO:0006959	humoral immune response	Biological Process	8	ENSMUSP00000023790,ENSMUSP00000022722,ENSMUSP00000025263,ENSMUSP00000028233,ENSMUSP00000023788,ENSMUSP00000031327,ENSMUSP00000074885,ENSMUSP00000028071
4	GO:0042092	type 2 immune response	Biological Process	3	ENSMUSP00000095171,ENSMUSP00000104548,ENSMUSP00000020970
4	GO:0045087	innate immune response	Biological Process	49	ENSMUSP00000023790,ENSMUSP00000006625,ENSMUSP00000080974,ENSMUSP00000028233,ENSMUSP00000104548,ENSMUSP00000025263,ENSMUSP00000019997,ENSMUSP00000007799,ENSMUSP00000056669,ENSMUSP00000142428,ENSMUSP00000020970,ENSMUSP00000082548,ENSMUSP00000019064,ENSMUSP00000033264,ENSMUSP00000039600,ENSMUSP00000126067,ENSMUSP00000087405,ENSMUSP00000028259,ENSMUSP00000032260,ENSMUSP00000095171,ENSMUSP00000087587,…
4	GO:0002457	T cell antigen processing and presentation	Biological Process	1	ENSMUSP00000083587
4	GO:0002468	dendritic cell antigen processing and presentation	Biological Process	1	ENSMUSP00000095171
4	GO:0002475	antigen processing and presentation via MHC class Ib	Biological Process	2	ENSMUSP00000131297,ENSMUSP00000099534
4	GO:0002504	antigen processing and presentation of peptide or polysaccharide antigen via MHC class II	Biological Process	3	ENSMUSP00000024791,ENSMUSP00000095171,ENSMUSP00000004949
4	GO:0019883	antigen processing and presentation of endogenous antigen	Biological Process	2	ENSMUSP00000131297,ENSMUSP00000099534
4	GO:0019884	antigen processing and presentation of exogenous antigen	Biological Process	3	ENSMUSP00000099534,ENSMUSP00000095171,ENSMUSP00000004949
4	GO:0048002	antigen processing and presentation of peptide antigen	Biological Process	5	ENSMUSP00000099534,ENSMUSP00000131297,ENSMUSP00000024791,ENSMUSP00000095171,ENSMUSP00000004949
4	GO:0031295	T cell costimulation	Biological Process	4	ENSMUSP00000016640,ENSMUSP00000122787,ENSMUSP00000007799,ENSMUSP00000044050
4	GO:0043368	positive T cell selection	Biological Process	4	ENSMUSP00000122787,ENSMUSP00000095171,ENSMUSP00000069851,ENSMUSP00000112675
4	GO:0043383	negative T cell selection	Biological Process	2	ENSMUSP00000095171,ENSMUSP00000122787
4	GO:0045061	thymic T cell selection	Biological Process	4	ENSMUSP00000095171,ENSMUSP00000069851,ENSMUSP00000122787,ENSMUSP00000112675
4	GO:0002269	leukocyte activation involved in inflammatory response	Biological Process	4	ENSMUSP00000027015,ENSMUSP00000126067,ENSMUSP00000034713,ENSMUSP00000015596
4	GO:0002274	myeloid leukocyte activation	Biological Process	8	ENSMUSP00000027015,ENSMUSP00000126067,ENSMUSP00000039600,ENSMUSP00000004949,ENSMUSP00000089051,ENSMUSP00000001008,ENSMUSP00000034713,ENSMUSP00000015596
4	GO:0002366	leukocyte activation involved in immune response	Biological Process	11	ENSMUSP00000083587,ENSMUSP00000032239,ENSMUSP00000122787,ENSMUSP00000019997,ENSMUSP00000022124,ENSMUSP00000089051,ENSMUSP00000001008,ENSMUSP00000054637,ENSMUSP00000104548,ENSMUSP00000103056,ENSMUSP00000110102
4	GO:0046649	lymphocyte activation	Biological Process	38	ENSMUSP00000103056,ENSMUSP00000083587,ENSMUSP00000032239,ENSMUSP00000122787,ENSMUSP00000019997,ENSMUSP00000022124,ENSMUSP00000047333,ENSMUSP00000112675,ENSMUSP00000002855,ENSMUSP00000069851,ENSMUSP00000095171,ENSMUSP00000033427,ENSMUSP00000028071,ENSMUSP00000016640,ENSMUSP00000007799,ENSMUSP00000044050,ENSMUSP00000104548,ENSMUSP00000099534,ENSMUSP00000022830,ENSMUSP00000109884,ENSMUSP00000028881,…
4	GO:0030595	leukocyte chemotaxis	Biological Process	14	ENSMUSP00000039600,ENSMUSP00000019266,ENSMUSP00000001008,ENSMUSP00000028233,ENSMUSP00000019064,ENSMUSP00000028881,ENSMUSP00000031327,ENSMUSP00000074885,ENSMUSP00000036245,ENSMUSP00000037028,ENSMUSP00000142428,ENSMUSP00000095171,ENSMUSP00000024706,ENSMUSP00000021970
4	GO:0045123	cellular extravasation	Biological Process	5	ENSMUSP00000083587,ENSMUSP00000039600,ENSMUSP00000025263,ENSMUSP00000122787,ENSMUSP00000022830
4	GO:0050904	diapedesis	Biological Process	1	ENSMUSP00000039600
4	GO:0071674	mononuclear cell migration	Biological Process	5	ENSMUSP00000039600,ENSMUSP00000019266,ENSMUSP00000001008,ENSMUSP00000024706,ENSMUSP00000142428
4	GO:0072676	lymphocyte migration	Biological Process	9	ENSMUSP00000019064,ENSMUSP00000001008,ENSMUSP00000039600,ENSMUSP00000036245,ENSMUSP00000019266,ENSMUSP00000083587,ENSMUSP00000122787,ENSMUSP00000022830,ENSMUSP00000021970
4	GO:0097529	myeloid leukocyte migration	Biological Process	14	ENSMUSP00000039600,ENSMUSP00000019266,ENSMUSP00000001008,ENSMUSP00000028233,ENSMUSP00000028881,ENSMUSP00000031327,ENSMUSP00000074885,ENSMUSP00000037028,ENSMUSP00000142428,ENSMUSP00000095171,ENSMUSP00000024706,ENSMUSP00000028882,ENSMUSP00000087119,ENSMUSP00000074471
4	GO:0001558	regulation of cell growth	Biological Process	16	ENSMUSP00000079699,ENSMUSP00000087119,ENSMUSP00000050374,ENSMUSP00000062277,ENSMUSP00000019064,ENSMUSP00000099907,ENSMUSP00000139147,ENSMUSP00000064536,ENSMUSP00000023583,ENSMUSP00000039604,ENSMUSP00000052465,ENSMUSP00000054499,ENSMUSP00000133302,ENSMUSP00000004910,ENSMUSP00000130684,ENSMUSP00000036245
4	GO:0030307	positive regulation of cell growth	Biological Process	10	ENSMUSP00000054499,ENSMUSP00000133302,ENSMUSP00000004910,ENSMUSP00000130684,ENSMUSP00000039604,ENSMUSP00000079699,ENSMUSP00000087119,ENSMUSP00000050374,ENSMUSP00000062277,ENSMUSP00000019064
4	GO:0030308	negative regulation of cell growth	Biological Process	5	ENSMUSP00000099907,ENSMUSP00000139147,ENSMUSP00000064536,ENSMUSP00000023583,ENSMUSP00000039604
4	GO:0048588	developmental cell growth	Biological Process	8	ENSMUSP00000052465,ENSMUSP00000099907,ENSMUSP00000054499,ENSMUSP00000133302,ENSMUSP00000004910,ENSMUSP00000130684,ENSMUSP00000109794,ENSMUSP00000039604
4	GO:0044126	regulation of growth of symbiont in host	Biological Process	3	ENSMUSP00000080974,ENSMUSP00000015981,ENSMUSP00000025263
4	GO:0044144	modulation of growth of symbiont involved in interaction with host	Biological Process	4	ENSMUSP00000080974,ENSMUSP00000015981,ENSMUSP00000025263,ENSMUSP00000023788
4	GO:0048638	regulation of developmental growth	Biological Process	10	ENSMUSP00000052465,ENSMUSP00000099907,ENSMUSP00000054499,ENSMUSP00000133302,ENSMUSP00000004910,ENSMUSP00000130684,ENSMUSP00000082777,ENSMUSP00000033427,ENSMUSP00000064536,ENSMUSP00000039604
4	GO:0044116	growth of symbiont involved in interaction with host	Biological Process	4	ENSMUSP00000080974,ENSMUSP00000015981,ENSMUSP00000025263,ENSMUSP00000023788
4	GO:0044146	negative regulation of growth of symbiont involved in interaction with host	Biological Process	4	ENSMUSP00000080974,ENSMUSP00000015981,ENSMUSP00000025263,ENSMUSP00000023788
4	GO:0048640	negative regulation of developmental growth	Biological Process	2	ENSMUSP00000099907,ENSMUSP00000064536
4	GO:0048639	positive regulation of developmental growth	Biological Process	6	ENSMUSP00000054499,ENSMUSP00000133302,ENSMUSP00000004910,ENSMUSP00000130684,ENSMUSP00000033427,ENSMUSP00000039604
4	GO:0042246	tissue regeneration	Biological Process	3	ENSMUSP00000109884,ENSMUSP00000064536,ENSMUSP00000029377
4	GO:0048630	skeletal muscle tissue growth	Biological Process	1	ENSMUSP00000028515
4	GO:0055017	cardiac muscle tissue growth	Biological Process	1	ENSMUSP00000064536
4	GO:0060560	developmental growth involved in morphogenesis	Biological Process	9	ENSMUSP00000052465,ENSMUSP00000099907,ENSMUSP00000054499,ENSMUSP00000133302,ENSMUSP00000004910,ENSMUSP00000130684,ENSMUSP00000109794,ENSMUSP00000027053,ENSMUSP00000039604
4	GO:0001662	behavioral fear response	Biological Process	3	ENSMUSP00000133302,ENSMUSP00000064536,ENSMUSP00000044050
4	GO:0007612	learning	Biological Process	5	ENSMUSP00000022176,ENSMUSP00000020278,ENSMUSP00000035065,ENSMUSP00000022429,ENSMUSP00000059977
4	GO:0007613	memory	Biological Process	8	ENSMUSP00000000769,ENSMUSP00000133302,ENSMUSP00000034713,ENSMUSP00000035065,ENSMUSP00000027015,ENSMUSP00000059977,ENSMUSP00000028881,ENSMUSP00000069850
4	GO:0048512	circadian behavior	Biological Process	1	ENSMUSP00000027015
4	GO:0008344	adult locomotory behavior	Biological Process	2	ENSMUSP00000026262,ENSMUSP00000126067
4	GO:0035641	locomotory exploration behavior	Biological Process	2	ENSMUSP00000133302,ENSMUSP00000044050
4	GO:0090659	walking behavior	Biological Process	1	ENSMUSP00000026262
4	GO:0042755	eating behavior	Biological Process	1	ENSMUSP00000080974
4	GO:0008542	visual learning	Biological Process	1	ENSMUSP00000022176
4	GO:0048148	behavioral response to cocaine	Biological Process	1	ENSMUSP00000126067
4	GO:0060746	parental behavior	Biological Process	1	ENSMUSP00000085423
4	GO:0045938	positive regulation of circadian sleep/wake cycle, sleep	Biological Process	1	ENSMUSP00000027015
4	GO:2000987	positive regulation of behavioral fear response	Biological Process	1	ENSMUSP00000064536
4	GO:0042749	regulation of circadian sleep/wake cycle	Biological Process	1	ENSMUSP00000027015
4	GO:2000822	regulation of behavioral fear response	Biological Process	2	ENSMUSP00000064536,ENSMUSP00000133302
4	GO:0035176	social behavior	Biological Process	2	ENSMUSP00000028881,ENSMUSP00000022345
4	GO:0036343	psychomotor behavior	Biological Process	1	ENSMUSP00000044050
4	GO:0048146	positive regulation of fibroblast proliferation	Biological Process	3	ENSMUSP00000054499,ENSMUSP00000095171,ENSMUSP00000015596
4	GO:0048661	positive regulation of smooth muscle cell proliferation	Biological Process	9	ENSMUSP00000025263,ENSMUSP00000034026,ENSMUSP00000035065,ENSMUSP00000074471,ENSMUSP00000022176,ENSMUSP00000039600,ENSMUSP00000094225,ENSMUSP00000004949,ENSMUSP00000015596
4	GO:0050679	positive regulation of epithelial cell proliferation	Biological Process	6	ENSMUSP00000007799,ENSMUSP00000099907,ENSMUSP00000071715,ENSMUSP00000109884,ENSMUSP00000019997,ENSMUSP00000039600
4	GO:0060252	positive regulation of glial cell proliferation	Biological Process	3	ENSMUSP00000083474,ENSMUSP00000025263,ENSMUSP00000028881
4	GO:0070346	positive regulation of fat cell proliferation	Biological Process	1	ENSMUSP00000127716
4	GO:0070665	positive regulation of leukocyte proliferation	Biological Process	9	ENSMUSP00000095171,ENSMUSP00000033427,ENSMUSP00000028071,ENSMUSP00000028881,ENSMUSP00000016640,ENSMUSP00000122787,ENSMUSP00000039600,ENSMUSP00000004949,ENSMUSP00000015596
4	GO:0072513	positive regulation of secondary heart field cardioblast proliferation	Biological Process	1	ENSMUSP00000087485
4	GO:2000179	positive regulation of neural precursor cell proliferation	Biological Process	1	ENSMUSP00000087485
4	GO:2000648	positive regulation of stem cell proliferation	Biological Process	1	ENSMUSP00000031327
4	GO:0048147	negative regulation of fibroblast proliferation	Biological Process	2	ENSMUSP00000144369,ENSMUSP00000062277
4	GO:0048662	negative regulation of smooth muscle cell proliferation	Biological Process	3	ENSMUSP00000019997,ENSMUSP00000121309,ENSMUSP00000007799
4	GO:0050680	negative regulation of epithelial cell proliferation	Biological Process	10	ENSMUSP00000133302,ENSMUSP00000025263,ENSMUSP00000064536,ENSMUSP00000007799,ENSMUSP00000000049,ENSMUSP00000015596,ENSMUSP00000050374,ENSMUSP00000000769,ENSMUSP00000022576,ENSMUSP00000023832
4	GO:0060044	negative regulation of cardiac muscle cell proliferation	Biological Process	1	ENSMUSP00000064536
4	GO:0070664	negative regulation of leukocyte proliferation	Biological Process	6	ENSMUSP00000031840,ENSMUSP00000016640,ENSMUSP00000122787,ENSMUSP00000017153,ENSMUSP00000069850,ENSMUSP00000103056
4	GO:2000178	negative regulation of neural precursor cell proliferation	Biological Process	1	ENSMUSP00000028881
4	GO:0060251	regulation of glial cell proliferation	Biological Process	3	ENSMUSP00000083474,ENSMUSP00000025263,ENSMUSP00000028881
4	GO:0014855	striated muscle cell proliferation	Biological Process	1	ENSMUSP00000064536
4	GO:0048659	smooth muscle cell proliferation	Biological Process	12	ENSMUSP00000035065,ENSMUSP00000025263,ENSMUSP00000074471,ENSMUSP00000022176,ENSMUSP00000039600,ENSMUSP00000094225,ENSMUSP00000004949,ENSMUSP00000015596,ENSMUSP00000019997,ENSMUSP00000121309,ENSMUSP00000007799,ENSMUSP00000034026
4	GO:0048145	regulation of fibroblast proliferation	Biological Process	5	ENSMUSP00000054499,ENSMUSP00000095171,ENSMUSP00000015596,ENSMUSP00000144369,ENSMUSP00000062277
4	GO:0048660	regulation of smooth muscle cell proliferation	Biological Process	12	ENSMUSP00000035065,ENSMUSP00000025263,ENSMUSP00000074471,ENSMUSP00000022176,ENSMUSP00000039600,ENSMUSP00000094225,ENSMUSP00000004949,ENSMUSP00000015596,ENSMUSP00000019997,ENSMUSP00000121309,ENSMUSP00000007799,ENSMUSP00000034026
4	GO:0050678	regulation of epithelial cell proliferation	Biological Process	15	ENSMUSP00000133302,ENSMUSP00000025263,ENSMUSP00000064536,ENSMUSP00000007799,ENSMUSP00000000049,ENSMUSP00000015596,ENSMUSP00000050374,ENSMUSP00000099907,ENSMUSP00000071715,ENSMUSP00000039600,ENSMUSP00000023832,ENSMUSP00000109884,ENSMUSP00000000769,ENSMUSP00000022576,ENSMUSP00000019997
4	GO:0060043	regulation of cardiac muscle cell proliferation	Biological Process	1	ENSMUSP00000064536
4	GO:0070344	regulation of fat cell proliferation	Biological Process	1	ENSMUSP00000127716
4	GO:0070663	regulation of leukocyte proliferation	Biological Process	16	ENSMUSP00000095171,ENSMUSP00000033427,ENSMUSP00000028071,ENSMUSP00000028881,ENSMUSP00000016640,ENSMUSP00000122787,ENSMUSP00000039600,ENSMUSP00000004949,ENSMUSP00000015596,ENSMUSP00000054637,ENSMUSP00000031840,ENSMUSP00000017153,ENSMUSP00000069850,ENSMUSP00000022830,ENSMUSP00000103056,ENSMUSP00000104548
4	GO:0072091	regulation of stem cell proliferation	Biological Process	1	ENSMUSP00000031327
4	GO:2000136	regulation of cell proliferation involved in heart morphogenesis	Biological Process	1	ENSMUSP00000087485
4	GO:2000177	regulation of neural precursor cell proliferation	Biological Process	2	ENSMUSP00000028881,ENSMUSP00000087485
4	GO:0001935	endothelial cell proliferation	Biological Process	7	ENSMUSP00000133302,ENSMUSP00000025263,ENSMUSP00000064536,ENSMUSP00000007799,ENSMUSP00000000049,ENSMUSP00000015596,ENSMUSP00000087119
4	GO:0033598	mammary gland epithelial cell proliferation	Biological Process	3	ENSMUSP00000099907,ENSMUSP00000071715,ENSMUSP00000069850
4	GO:0043616	keratinocyte proliferation	Biological Process	1	ENSMUSP00000050374
4	GO:0060664	epithelial cell proliferation involved in salivary gland morphogenesis	Biological Process	1	ENSMUSP00000025263
4	GO:0072575	epithelial cell proliferation involved in liver morphogenesis	Biological Process	3	ENSMUSP00000069850,ENSMUSP00000022576,ENSMUSP00000019997
4	GO:0003263	cardioblast proliferation	Biological Process	1	ENSMUSP00000087485
4	GO:0007405	neuroblast proliferation	Biological Process	1	ENSMUSP00000043088
4	GO:0032943	mononuclear cell proliferation	Biological Process	19	ENSMUSP00000022124,ENSMUSP00000095171,ENSMUSP00000033427,ENSMUSP00000028071,ENSMUSP00000028881,ENSMUSP00000037206,ENSMUSP00000020964,ENSMUSP00000016640,ENSMUSP00000122787,ENSMUSP00000039600,ENSMUSP00000004949,ENSMUSP00000015596,ENSMUSP00000054637,ENSMUSP00000031840,ENSMUSP00000017153,ENSMUSP00000069850,ENSMUSP00000022830,ENSMUSP00000103056,ENSMUSP00000104548
4	GO:0071425	hematopoietic stem cell proliferation	Biological Process	1	ENSMUSP00000031327
4	GO:0051304	chromosome separation	Biological Process	1	ENSMUSP00000031072
4	GO:0051983	regulation of chromosome segregation	Biological Process	2	ENSMUSP00000031072,ENSMUSP00000020931
4	GO:0051984	positive regulation of chromosome segregation	Biological Process	2	ENSMUSP00000031072,ENSMUSP00000020931
4	GO:0098813	nuclear chromosome segregation	Biological Process	3	ENSMUSP00000047700,ENSMUSP00000031072,ENSMUSP00000136323
4	GO:0000226	microtubule cytoskeleton organization	Biological Process	17	ENSMUSP00000127990,ENSMUSP00000033282,ENSMUSP00000037000,ENSMUSP00000030636,ENSMUSP00000022009,ENSMUSP00000000776,ENSMUSP00000111309,ENSMUSP00000022784,ENSMUSP00000049973,ENSMUSP00000150618,ENSMUSP00000126067,ENSMUSP00000007799,ENSMUSP00000006625,ENSMUSP00000018645,ENSMUSP00000062637,ENSMUSP00000025779,ENSMUSP00000113252
4	GO:0007018	microtubule-based movement	Biological Process	3	ENSMUSP00000036614,ENSMUSP00000101312,ENSMUSP00000033570
4	GO:0031023	microtubule organizing center organization	Biological Process	7	ENSMUSP00000022784,ENSMUSP00000049973,ENSMUSP00000022009,ENSMUSP00000006625,ENSMUSP00000111309,ENSMUSP00000037000,ENSMUSP00000062637
4	GO:0032886	regulation of microtubule-based process	Biological Process	9	ENSMUSP00000030636,ENSMUSP00000126067,ENSMUSP00000007799,ENSMUSP00000006625,ENSMUSP00000111309,ENSMUSP00000037000,ENSMUSP00000033570,ENSMUSP00000025779,ENSMUSP00000113252
4	GO:0007093	mitotic cell cycle checkpoint	Biological Process	2	ENSMUSP00000030622,ENSMUSP00000057573
4	GO:0031570	DNA integrity checkpoint	Biological Process	2	ENSMUSP00000030622,ENSMUSP00000057573
4	GO:0030168	platelet activation	Biological Process	3	ENSMUSP00000133302,ENSMUSP00000089051,ENSMUSP00000141648
4	GO:0050865	regulation of cell activation	Biological Process	31	ENSMUSP00000133302,ENSMUSP00000095171,ENSMUSP00000033427,ENSMUSP00000028071,ENSMUSP00000016640,ENSMUSP00000122787,ENSMUSP00000007799,ENSMUSP00000044050,ENSMUSP00000104548,ENSMUSP00000028881,ENSMUSP00000039600,ENSMUSP00000004949,ENSMUSP00000015596,ENSMUSP00000054637,ENSMUSP00000031840,ENSMUSP00000017153,ENSMUSP00000069850,ENSMUSP00000126067,ENSMUSP00000089051,ENSMUSP00000103056,ENSMUSP00000015540,…
4	GO:0050866	negative regulation of cell activation	Biological Process	15	ENSMUSP00000133302,ENSMUSP00000031840,ENSMUSP00000016640,ENSMUSP00000122787,ENSMUSP00000017153,ENSMUSP00000069850,ENSMUSP00000103056,ENSMUSP00000110232,ENSMUSP00000095171,ENSMUSP00000104548,ENSMUSP00000019997,ENSMUSP00000109877,ENSMUSP00000034713,ENSMUSP00000141648,ENSMUSP00000112675
4	GO:0050867	positive regulation of cell activation	Biological Process	18	ENSMUSP00000095171,ENSMUSP00000033427,ENSMUSP00000028071,ENSMUSP00000016640,ENSMUSP00000122787,ENSMUSP00000007799,ENSMUSP00000044050,ENSMUSP00000104548,ENSMUSP00000028881,ENSMUSP00000039600,ENSMUSP00000004949,ENSMUSP00000015596,ENSMUSP00000089051,ENSMUSP00000015540,ENSMUSP00000103056,ENSMUSP00000087119,ENSMUSP00000069851,ENSMUSP00000110102
4	GO:0061900	glial cell activation	Biological Process	4	ENSMUSP00000027015,ENSMUSP00000126067,ENSMUSP00000034713,ENSMUSP00000015596
4	GO:0042026	protein refolding	Biological Process	2	ENSMUSP00000027961,ENSMUSP00000099534
4	GO:0006458	'de novo' protein folding	Biological Process	5	ENSMUSP00000041380,ENSMUSP00000095171,ENSMUSP00000053916,ENSMUSP00000027961,ENSMUSP00000009707
4	GO:0022417	protein maturation by protein folding	Biological Process	1	ENSMUSP00000041380
4	GO:0061077	chaperone-mediated protein folding	Biological Process	7	ENSMUSP00000095171,ENSMUSP00000053916,ENSMUSP00000027961,ENSMUSP00000009707,ENSMUSP00000113761,ENSMUSP00000037206,ENSMUSP00000020964
4	GO:1903332	regulation of protein folding	Biological Process	1	ENSMUSP00000113761
4	GO:1903333	negative regulation of protein folding	Biological Process	1	ENSMUSP00000113761
4	GO:0002764	immune response-regulating signaling pathway	Biological Process	14	ENSMUSP00000080974,ENSMUSP00000110102,ENSMUSP00000004910,ENSMUSP00000004949,ENSMUSP00000104548,ENSMUSP00000025263,ENSMUSP00000019997,ENSMUSP00000007799,ENSMUSP00000056669,ENSMUSP00000142428,ENSMUSP00000020970,ENSMUSP00000032239,ENSMUSP00000028259,ENSMUSP00000112675
4	GO:0035556	intracellular signal transduction	Biological Process	78	ENSMUSP00000025263,ENSMUSP00000028881,ENSMUSP00000039600,ENSMUSP00000069851,ENSMUSP00000001008,ENSMUSP00000086459,ENSMUSP00000051492,ENSMUSP00000040307,ENSMUSP00000095171,ENSMUSP00000071715,ENSMUSP00000007799,ENSMUSP00000101734,ENSMUSP00000020312,ENSMUSP00000022009,ENSMUSP00000022830,ENSMUSP00000104548,ENSMUSP00000004949,ENSMUSP00000080717,ENSMUSP00000006956,ENSMUSP00000074471,ENSMUSP00000039604,…
4	GO:0006984	ER-nucleus signaling pathway	Biological Process	2	ENSMUSP00000112675,ENSMUSP00000103056
4	GO:0007166	cell surface receptor signaling pathway	Biological Process	86	ENSMUSP00000007799,ENSMUSP00000095171,ENSMUSP00000023788,ENSMUSP00000058629,ENSMUSP00000109884,ENSMUSP00000035167,ENSMUSP00000025523,ENSMUSP00000029711,ENSMUSP00000023809,ENSMUSP00000022429,ENSMUSP00000021963,ENSMUSP00000034026,ENSMUSP00000145451,ENSMUSP00000037206,ENSMUSP00000043088,ENSMUSP00000007317,ENSMUSP00000146675,ENSMUSP00000032194,ENSMUSP00000036240,ENSMUSP00000085293,ENSMUSP00000033053,…
4	GO:0007186	G protein-coupled receptor signaling pathway	Biological Process	27	ENSMUSP00000053394,ENSMUSP00000085293,ENSMUSP00000025602,ENSMUSP00000049175,ENSMUSP00000101734,ENSMUSP00000027639,ENSMUSP00000043088,ENSMUSP00000020278,ENSMUSP00000127990,ENSMUSP00000039600,ENSMUSP00000096152,ENSMUSP00000034026,ENSMUSP00000030636,ENSMUSP00000126067,ENSMUSP00000007799,ENSMUSP00000133302,ENSMUSP00000121127,ENSMUSP00000087485,ENSMUSP00000058629,ENSMUSP00000134530,ENSMUSP00000019266,…
4	GO:0009755	hormone-mediated signaling pathway	Biological Process	5	ENSMUSP00000055714,ENSMUSP00000094225,ENSMUSP00000095199,ENSMUSP00000047333,ENSMUSP00000018645
4	GO:0009756	carbohydrate mediated signaling	Biological Process	1	ENSMUSP00000015596
4	GO:0009966	regulation of signal transduction	Biological Process	91	ENSMUSP00000025263,ENSMUSP00000040307,ENSMUSP00000086459,ENSMUSP00000095171,ENSMUSP00000028881,ENSMUSP00000071715,ENSMUSP00000007799,ENSMUSP00000080717,ENSMUSP00000004949,ENSMUSP00000039604,ENSMUSP00000127990,ENSMUSP00000062637,ENSMUSP00000036240,ENSMUSP00000025523,ENSMUSP00000029711,ENSMUSP00000031840,ENSMUSP00000055714,ENSMUSP00000031327,ENSMUSP00000019064,ENSMUSP00000039600,ENSMUSP00000028882,…
4	GO:0009967	positive regulation of signal transduction	Biological Process	48	ENSMUSP00000025263,ENSMUSP00000040307,ENSMUSP00000086459,ENSMUSP00000095171,ENSMUSP00000028881,ENSMUSP00000071715,ENSMUSP00000080717,ENSMUSP00000004949,ENSMUSP00000039604,ENSMUSP00000039600,ENSMUSP00000024932,ENSMUSP00000019997,ENSMUSP00000022124,ENSMUSP00000022176,ENSMUSP00000041503,ENSMUSP00000028882,ENSMUSP00000055714,ENSMUSP00000094225,ENSMUSP00000007799,ENSMUSP00000020970,ENSMUSP00000037657,…
4	GO:0009968	negative regulation of signal transduction	Biological Process	40	ENSMUSP00000007799,ENSMUSP00000126067,ENSMUSP00000112675,ENSMUSP00000039600,ENSMUSP00000047333,ENSMUSP00000058629,ENSMUSP00000154338,ENSMUSP00000033570,ENSMUSP00000019997,ENSMUSP00000030636,ENSMUSP00000037657,ENSMUSP00000104548,ENSMUSP00000088291,ENSMUSP00000133302,ENSMUSP00000028881,ENSMUSP00000022176,ENSMUSP00000095171,ENSMUSP00000087119,ENSMUSP00000018645,ENSMUSP00000127716,ENSMUSP00000023583,…
4	GO:0023014	signal transduction by protein phosphorylation	Biological Process	35	ENSMUSP00000025263,ENSMUSP00000028881,ENSMUSP00000039600,ENSMUSP00000069851,ENSMUSP00000001008,ENSMUSP00000086459,ENSMUSP00000051492,ENSMUSP00000040307,ENSMUSP00000095171,ENSMUSP00000071715,ENSMUSP00000007799,ENSMUSP00000074471,ENSMUSP00000004949,ENSMUSP00000039604,ENSMUSP00000033570,ENSMUSP00000022176,ENSMUSP00000041503,ENSMUSP00000028882,ENSMUSP00000133302,ENSMUSP00000080974,ENSMUSP00000025523,…
4	GO:0030522	intracellular receptor signaling pathway	Biological Process	7	ENSMUSP00000055714,ENSMUSP00000094225,ENSMUSP00000028259,ENSMUSP00000095199,ENSMUSP00000047333,ENSMUSP00000018645,ENSMUSP00000019997
4	GO:0030968	endoplasmic reticulum unfolded protein response	Biological Process	1	ENSMUSP00000112675
4	GO:0038034	signal transduction in absence of ligand	Biological Process	5	ENSMUSP00000028881,ENSMUSP00000117229,ENSMUSP00000028882,ENSMUSP00000025263,ENSMUSP00000130078
4	GO:0055095	lipoprotein particle mediated signaling	Biological Process	1	ENSMUSP00000080974
4	GO:0060395	SMAD protein signal transduction	Biological Process	2	ENSMUSP00000026262,ENSMUSP00000006625
4	GO:0090520	sphingolipid mediated signaling pathway	Biological Process	3	ENSMUSP00000053394,ENSMUSP00000085293,ENSMUSP00000065719
4	GO:0097190	apoptotic signaling pathway	Biological Process	27	ENSMUSP00000050374,ENSMUSP00000025263,ENSMUSP00000117229,ENSMUSP00000041503,ENSMUSP00000069850,ENSMUSP00000022419,ENSMUSP00000113761,ENSMUSP00000028881,ENSMUSP00000028882,ENSMUSP00000039604,ENSMUSP00000083587,ENSMUSP00000019997,ENSMUSP00000141648,ENSMUSP00000095171,ENSMUSP00000035065,ENSMUSP00000062277,ENSMUSP00000112675,ENSMUSP00000033570,ENSMUSP00000028071,ENSMUSP00000130759,ENSMUSP00000019470,…
4	GO:0097527	necroptotic signaling pathway	Biological Process	1	ENSMUSP00000025263
4	GO:0098926	postsynaptic signal transduction	Biological Process	1	ENSMUSP00000137310
4	GO:0048199	vesicle targeting, to, from or within Golgi	Biological Process	1	ENSMUSP00000020653
4	GO:0030048	actin filament-based movement	Biological Process	2	ENSMUSP00000087736,ENSMUSP00000007799
4	GO:0051270	regulation of cellular component movement	Biological Process	37	ENSMUSP00000083587,ENSMUSP00000000769,ENSMUSP00000000049,ENSMUSP00000015596,ENSMUSP00000099907,ENSMUSP00000039600,ENSMUSP00000028233,ENSMUSP00000017153,ENSMUSP00000054499,ENSMUSP00000031840,ENSMUSP00000025523,ENSMUSP00000087119,ENSMUSP00000028881,ENSMUSP00000062277,ENSMUSP00000016640,ENSMUSP00000019064,ENSMUSP00000007799,ENSMUSP00000001008,ENSMUSP00000007280,ENSMUSP00000139147,ENSMUSP00000049440,…
4	GO:0051271	negative regulation of cellular component movement	Biological Process	9	ENSMUSP00000000769,ENSMUSP00000000049,ENSMUSP00000015596,ENSMUSP00000028233,ENSMUSP00000007280,ENSMUSP00000139147,ENSMUSP00000049440,ENSMUSP00000133302,ENSMUSP00000023832
4	GO:0051272	positive regulation of cellular component movement	Biological Process	26	ENSMUSP00000083587,ENSMUSP00000099907,ENSMUSP00000039600,ENSMUSP00000015596,ENSMUSP00000054499,ENSMUSP00000031840,ENSMUSP00000025523,ENSMUSP00000087119,ENSMUSP00000028881,ENSMUSP00000062277,ENSMUSP00000016640,ENSMUSP00000019064,ENSMUSP00000007799,ENSMUSP00000001008,ENSMUSP00000065719,ENSMUSP00000142428,ENSMUSP00000095171,ENSMUSP00000037028,ENSMUSP00000024706,ENSMUSP00000035065,ENSMUSP00000020278,…
4	GO:0097485	neuron projection guidance	Biological Process	2	ENSMUSP00000109794,ENSMUSP00000025523
4	GO:0000768	syncytium formation by plasma membrane fusion	Biological Process	1	ENSMUSP00000027015
4	GO:0000278	mitotic cell cycle	Biological Process	23	ENSMUSP00000071715,ENSMUSP00000094225,ENSMUSP00000061305,ENSMUSP00000127990,ENSMUSP00000033282,ENSMUSP00000037000,ENSMUSP00000030636,ENSMUSP00000047700,ENSMUSP00000030622,ENSMUSP00000031072,ENSMUSP00000057573,ENSMUSP00000025263,ENSMUSP00000028881,ENSMUSP00000028882,ENSMUSP00000111204,ENSMUSP00000111309,ENSMUSP00000000776,ENSMUSP00000022009,ENSMUSP00000019470,ENSMUSP00000031840,ENSMUSP00000027367,…
4	GO:0051726	regulation of cell cycle	Biological Process	29	ENSMUSP00000050374,ENSMUSP00000033282,ENSMUSP00000104548,ENSMUSP00000112600,ENSMUSP00000030622,ENSMUSP00000031072,ENSMUSP00000057573,ENSMUSP00000019997,ENSMUSP00000035065,ENSMUSP00000034026,ENSMUSP00000062277,ENSMUSP00000033264,ENSMUSP00000025263,ENSMUSP00000028881,ENSMUSP00000028882,ENSMUSP00000111204,ENSMUSP00000006625,ENSMUSP00000111309,ENSMUSP00000037000,ENSMUSP00000035179,ENSMUSP00000019470,…
4	GO:0045786	negative regulation of cell cycle	Biological Process	13	ENSMUSP00000104548,ENSMUSP00000112600,ENSMUSP00000030622,ENSMUSP00000057573,ENSMUSP00000019997,ENSMUSP00000025263,ENSMUSP00000006625,ENSMUSP00000037000,ENSMUSP00000031840,ENSMUSP00000027367,ENSMUSP00000025779,ENSMUSP00000035065,ENSMUSP00000034026
4	GO:0045787	positive regulation of cell cycle	Biological Process	9	ENSMUSP00000025263,ENSMUSP00000028881,ENSMUSP00000028882,ENSMUSP00000031072,ENSMUSP00000111204,ENSMUSP00000111309,ENSMUSP00000035179,ENSMUSP00000062277,ENSMUSP00000033264
4	GO:0007412	axon target recognition	Biological Process	1	ENSMUSP00000089051
4	GO:0010643	cell communication by chemical coupling	Biological Process	1	ENSMUSP00000064536
4	GO:0010644	cell communication by electrical coupling	Biological Process	2	ENSMUSP00000064536,ENSMUSP00000007799
4	GO:0010646	regulation of cell communication	Biological Process	99	ENSMUSP00000025263,ENSMUSP00000040307,ENSMUSP00000086459,ENSMUSP00000095171,ENSMUSP00000028881,ENSMUSP00000071715,ENSMUSP00000007799,ENSMUSP00000126067,ENSMUSP00000080717,ENSMUSP00000004949,ENSMUSP00000039604,ENSMUSP00000018610,ENSMUSP00000039600,ENSMUSP00000127990,ENSMUSP00000062637,ENSMUSP00000036240,ENSMUSP00000033570,ENSMUSP00000025523,ENSMUSP00000029711,ENSMUSP00000031840,ENSMUSP00000055714,…
4	GO:0010647	positive regulation of cell communication	Biological Process	56	ENSMUSP00000025263,ENSMUSP00000040307,ENSMUSP00000086459,ENSMUSP00000095171,ENSMUSP00000028881,ENSMUSP00000071715,ENSMUSP00000126067,ENSMUSP00000080717,ENSMUSP00000004949,ENSMUSP00000039604,ENSMUSP00000007799,ENSMUSP00000064536,ENSMUSP00000020278,ENSMUSP00000039600,ENSMUSP00000024932,ENSMUSP00000019997,ENSMUSP00000022124,ENSMUSP00000020312,ENSMUSP00000022176,ENSMUSP00000041503,ENSMUSP00000028882,…
4	GO:0010648	negative regulation of cell communication	Biological Process	45	ENSMUSP00000007799,ENSMUSP00000025523,ENSMUSP00000029711,ENSMUSP00000126067,ENSMUSP00000112675,ENSMUSP00000039600,ENSMUSP00000047333,ENSMUSP00000058629,ENSMUSP00000154338,ENSMUSP00000035065,ENSMUSP00000089051,ENSMUSP00000059977,ENSMUSP00000033570,ENSMUSP00000020278,ENSMUSP00000019997,ENSMUSP00000030636,ENSMUSP00000037657,ENSMUSP00000104548,ENSMUSP00000088291,ENSMUSP00000133302,ENSMUSP00000028881,…
4	GO:0019226	transmission of nerve impulse	Biological Process	2	ENSMUSP00000020964,ENSMUSP00000028515
4	GO:0031668	cellular response to extracellular stimulus	Biological Process	6	ENSMUSP00000065423,ENSMUSP00000111204,ENSMUSP00000020543,ENSMUSP00000091692,ENSMUSP00000035065,ENSMUSP00000094225
4	GO:0086065	cell communication involved in cardiac conduction	Biological Process	2	ENSMUSP00000064536,ENSMUSP00000007799
4	GO:0030010	establishment of cell polarity	Biological Process	5	ENSMUSP00000127990,ENSMUSP00000033282,ENSMUSP00000037000,ENSMUSP00000033560,ENSMUSP00000064536
4	GO:0061245	establishment or maintenance of bipolar cell polarity	Biological Process	2	ENSMUSP00000022429,ENSMUSP00000033560
4	GO:0061339	establishment or maintenance of monopolar cell polarity	Biological Process	1	ENSMUSP00000033560
4	GO:0008366	axon ensheathment	Biological Process	4	ENSMUSP00000033800,ENSMUSP00000025263,ENSMUSP00000026262,ENSMUSP00000004910
4	GO:0012501	programmed cell death	Biological Process	70	ENSMUSP00000050374,ENSMUSP00000137253,ENSMUSP00000095171,ENSMUSP00000027015,ENSMUSP00000015981,ENSMUSP00000025263,ENSMUSP00000019997,ENSMUSP00000019470,ENSMUSP00000022419,ENSMUSP00000032888,ENSMUSP00000117229,ENSMUSP00000030154,ENSMUSP00000113761,ENSMUSP00000126067,ENSMUSP00000104272,ENSMUSP00000080717,ENSMUSP00000064536,ENSMUSP00000040307,ENSMUSP00000104548,ENSMUSP00000130759,ENSMUSP00000133360,…
4	GO:0070265	necrotic cell death	Biological Process	6	ENSMUSP00000022419,ENSMUSP00000022830,ENSMUSP00000007799,ENSMUSP00000027015,ENSMUSP00000025263,ENSMUSP00000002737
4	GO:0010941	regulation of cell death	Biological Process	62	ENSMUSP00000137253,ENSMUSP00000095171,ENSMUSP00000027015,ENSMUSP00000025263,ENSMUSP00000126067,ENSMUSP00000039604,ENSMUSP00000087736,ENSMUSP00000054499,ENSMUSP00000025523,ENSMUSP00000035065,ENSMUSP00000022429,ENSMUSP00000121848,ENSMUSP00000111204,ENSMUSP00000022419,ENSMUSP00000032888,ENSMUSP00000117229,ENSMUSP00000022176,ENSMUSP00000023832,ENSMUSP00000037028,ENSMUSP00000029711,ENSMUSP00000051492,…
4	GO:0010942	positive regulation of cell death	Biological Process	23	ENSMUSP00000027015,ENSMUSP00000025263,ENSMUSP00000126067,ENSMUSP00000039604,ENSMUSP00000022176,ENSMUSP00000022830,ENSMUSP00000035065,ENSMUSP00000099890,ENSMUSP00000070868,ENSMUSP00000028881,ENSMUSP00000113761,ENSMUSP00000041503,ENSMUSP00000034026,ENSMUSP00000037028,ENSMUSP00000015596,ENSMUSP00000001008,ENSMUSP00000039600,ENSMUSP00000022419,ENSMUSP00000112675,ENSMUSP00000016640,ENSMUSP00000007799,…
4	GO:0036473	cell death in response to oxidative stress	Biological Process	2	ENSMUSP00000041503,ENSMUSP00000058629
4	GO:0060548	negative regulation of cell death	Biological Process	41	ENSMUSP00000137253,ENSMUSP00000095171,ENSMUSP00000087736,ENSMUSP00000054499,ENSMUSP00000025523,ENSMUSP00000035065,ENSMUSP00000022429,ENSMUSP00000121848,ENSMUSP00000111204,ENSMUSP00000022419,ENSMUSP00000032888,ENSMUSP00000117229,ENSMUSP00000022176,ENSMUSP00000126067,ENSMUSP00000023832,ENSMUSP00000037028,ENSMUSP00000029711,ENSMUSP00000051492,ENSMUSP00000056691,ENSMUSP00000007799,ENSMUSP00000069851,…
4	GO:0070997	neuron death	Biological Process	14	ENSMUSP00000133302,ENSMUSP00000089051,ENSMUSP00000020543,ENSMUSP00000126067,ENSMUSP00000069850,ENSMUSP00000025263,ENSMUSP00000028881,ENSMUSP00000001008,ENSMUSP00000015596,ENSMUSP00000039600,ENSMUSP00000031840,ENSMUSP00000000769,ENSMUSP00000058629,ENSMUSP00000074885
4	GO:0006910	phagocytosis, recognition	Biological Process	1	ENSMUSP00000080974
4	GO:0008038	neuron recognition	Biological Process	1	ENSMUSP00000099907
4	GO:0009988	cell-cell recognition	Biological Process	2	ENSMUSP00000127646,ENSMUSP00000091692
4	GO:0006325	chromatin organization	Biological Process	18	ENSMUSP00000116252,ENSMUSP00000137253,ENSMUSP00000086094,ENSMUSP00000110232,ENSMUSP00000047333,ENSMUSP00000028071,ENSMUSP00000089948,ENSMUSP00000119057,ENSMUSP00000042987,ENSMUSP00000006625,ENSMUSP00000133279,ENSMUSP00000103056,ENSMUSP00000126067,ENSMUSP00000040307,ENSMUSP00000025444,ENSMUSP00000021807,ENSMUSP00000062576,ENSMUSP00000103486
4	GO:0006996	organelle organization	Biological Process	122	ENSMUSP00000023217,ENSMUSP00000069004,ENSMUSP00000026173,ENSMUSP00000045201,ENSMUSP00000147061,ENSMUSP00000035179,ENSMUSP00000018985,ENSMUSP00000127990,ENSMUSP00000033282,ENSMUSP00000037000,ENSMUSP00000000776,ENSMUSP00000039604,ENSMUSP00000015981,ENSMUSP00000020931,ENSMUSP00000050374,ENSMUSP00000020653,ENSMUSP00000116252,ENSMUSP00000085566,ENSMUSP00000033560,ENSMUSP00000078429,ENSMUSP00000007275,…
4	GO:0010256	endomembrane system organization	Biological Process	10	ENSMUSP00000101312,ENSMUSP00000034460,ENSMUSP00000015981,ENSMUSP00000104272,ENSMUSP00000047700,ENSMUSP00000007799,ENSMUSP00000099907,ENSMUSP00000032888,ENSMUSP00000130684,ENSMUSP00000042053
4	GO:0022607	cellular component assembly	Biological Process	85	ENSMUSP00000023217,ENSMUSP00000069004,ENSMUSP00000026173,ENSMUSP00000045201,ENSMUSP00000147061,ENSMUSP00000035644,ENSMUSP00000116259,ENSMUSP00000086987,ENSMUSP00000020653,ENSMUSP00000116252,ENSMUSP00000137253,ENSMUSP00000051492,ENSMUSP00000022009,ENSMUSP00000000776,ENSMUSP00000054499,ENSMUSP00000037206,ENSMUSP00000151388,ENSMUSP00000036240,ENSMUSP00000035167,ENSMUSP00000062637,ENSMUSP00000091319,…
4	GO:0022411	cellular component disassembly	Biological Process	17	ENSMUSP00000026173,ENSMUSP00000045201,ENSMUSP00000147061,ENSMUSP00000015981,ENSMUSP00000086094,ENSMUSP00000116252,ENSMUSP00000116746,ENSMUSP00000022600,ENSMUSP00000030636,ENSMUSP00000044050,ENSMUSP00000025263,ENSMUSP00000096152,ENSMUSP00000051492,ENSMUSP00000008748,ENSMUSP00000065423,ENSMUSP00000129789,ENSMUSP00000039604
4	GO:0030030	cell projection organization	Biological Process	44	ENSMUSP00000030636,ENSMUSP00000109794,ENSMUSP00000025523,ENSMUSP00000089051,ENSMUSP00000099907,ENSMUSP00000151388,ENSMUSP00000036240,ENSMUSP00000035167,ENSMUSP00000062637,ENSMUSP00000091319,ENSMUSP00000133302,ENSMUSP00000111309,ENSMUSP00000127990,ENSMUSP00000058629,ENSMUSP00000037028,ENSMUSP00000000769,ENSMUSP00000051492,ENSMUSP00000099534,ENSMUSP00000052465,ENSMUSP00000036614,ENSMUSP00000033560,…
4	GO:0032535	regulation of cellular component size	Biological Process	12	ENSMUSP00000038106,ENSMUSP00000071715,ENSMUSP00000052465,ENSMUSP00000099907,ENSMUSP00000047275,ENSMUSP00000083587,ENSMUSP00000054499,ENSMUSP00000133302,ENSMUSP00000004910,ENSMUSP00000130684,ENSMUSP00000049440,ENSMUSP00000096152
4	GO:0032989	cellular component morphogenesis	Biological Process	29	ENSMUSP00000004968,ENSMUSP00000030636,ENSMUSP00000109794,ENSMUSP00000025523,ENSMUSP00000089051,ENSMUSP00000054499,ENSMUSP00000083587,ENSMUSP00000106087,ENSMUSP00000085566,ENSMUSP00000001008,ENSMUSP00000096152,ENSMUSP00000087736,ENSMUSP00000052465,ENSMUSP00000099907,ENSMUSP00000109884,ENSMUSP00000071486,ENSMUSP00000007317,ENSMUSP00000133302,ENSMUSP00000004910,ENSMUSP00000130684,ENSMUSP00000026262,…
4	GO:0034330	cell junction organization	Biological Process	9	ENSMUSP00000054499,ENSMUSP00000033560,ENSMUSP00000064536,ENSMUSP00000025523,ENSMUSP00000033721,ENSMUSP00000017153,ENSMUSP00000087119,ENSMUSP00000025263,ENSMUSP00000007799
4	GO:0043062	extracellular structure organization	Biological Process	11	ENSMUSP00000022576,ENSMUSP00000044050,ENSMUSP00000054499,ENSMUSP00000025263,ENSMUSP00000035167,ENSMUSP00000058761,ENSMUSP00000004968,ENSMUSP00000133302,ENSMUSP00000024706,ENSMUSP00000017153,ENSMUSP00000080974
4	GO:0043933	protein-containing complex subunit organization	Biological Process	60	ENSMUSP00000023217,ENSMUSP00000069004,ENSMUSP00000035644,ENSMUSP00000116259,ENSMUSP00000086987,ENSMUSP00000020653,ENSMUSP00000116252,ENSMUSP00000086094,ENSMUSP00000051492,ENSMUSP00000116746,ENSMUSP00000022600,ENSMUSP00000030636,ENSMUSP00000022009,ENSMUSP00000000776,ENSMUSP00000037206,ENSMUSP00000089051,ENSMUSP00000004968,ENSMUSP00000047275,ENSMUSP00000083587,ENSMUSP00000126067,ENSMUSP00000007799,…
4	GO:0043954	cellular component maintenance	Biological Process	3	ENSMUSP00000025523,ENSMUSP00000033560,ENSMUSP00000133302
4	GO:0050808	synapse organization	Biological Process	7	ENSMUSP00000028515,ENSMUSP00000025263,ENSMUSP00000101734,ENSMUSP00000133302,ENSMUSP00000033560,ENSMUSP00000071486,ENSMUSP00000126067
4	GO:0051128	regulation of cellular component organization	Biological Process	72	ENSMUSP00000036245,ENSMUSP00000056715,ENSMUSP00000022576,ENSMUSP00000020653,ENSMUSP00000054499,ENSMUSP00000083587,ENSMUSP00000025523,ENSMUSP00000106087,ENSMUSP00000085566,ENSMUSP00000001008,ENSMUSP00000039604,ENSMUSP00000044050,ENSMUSP00000089051,ENSMUSP00000133302,ENSMUSP00000111309,ENSMUSP00000127990,ENSMUSP00000058629,ENSMUSP00000037028,ENSMUSP00000000769,ENSMUSP00000051492,ENSMUSP00000099907,…
4	GO:0051129	negative regulation of cellular component organization	Biological Process	24	ENSMUSP00000056715,ENSMUSP00000039604,ENSMUSP00000044050,ENSMUSP00000133302,ENSMUSP00000099907,ENSMUSP00000099534,ENSMUSP00000030636,ENSMUSP00000126067,ENSMUSP00000089051,ENSMUSP00000137253,ENSMUSP00000025263,ENSMUSP00000045527,ENSMUSP00000035898,ENSMUSP00000006625,ENSMUSP00000007799,ENSMUSP00000049440,ENSMUSP00000033721,ENSMUSP00000096152,ENSMUSP00000087119,ENSMUSP00000022419,ENSMUSP00000133279,…
4	GO:0051130	positive regulation of cellular component organization	Biological Process	40	ENSMUSP00000022576,ENSMUSP00000133302,ENSMUSP00000111309,ENSMUSP00000127990,ENSMUSP00000058629,ENSMUSP00000037028,ENSMUSP00000000769,ENSMUSP00000051492,ENSMUSP00000083587,ENSMUSP00000133279,ENSMUSP00000103056,ENSMUSP00000007799,ENSMUSP00000025263,ENSMUSP00000070868,ENSMUSP00000086459,ENSMUSP00000042987,ENSMUSP00000034746,ENSMUSP00000054499,ENSMUSP00000004910,ENSMUSP00000130684,ENSMUSP00000056669,…
4	GO:0061024	membrane organization	Biological Process	25	ENSMUSP00000020653,ENSMUSP00000024791,ENSMUSP00000101312,ENSMUSP00000126067,ENSMUSP00000027114,ENSMUSP00000091692,ENSMUSP00000104272,ENSMUSP00000089051,ENSMUSP00000070868,ENSMUSP00000047700,ENSMUSP00000021203,ENSMUSP00000029257,ENSMUSP00000022419,ENSMUSP00000044877,ENSMUSP00000080974,ENSMUSP00000015596,ENSMUSP00000007799,ENSMUSP00000033900,ENSMUSP00000133302,ENSMUSP00000042053,ENSMUSP00000039604,…
4	GO:0097435	supramolecular fiber organization	Biological Process	26	ENSMUSP00000103546,ENSMUSP00000033721,ENSMUSP00000030636,ENSMUSP00000022009,ENSMUSP00000000776,ENSMUSP00000004968,ENSMUSP00000096152,ENSMUSP00000087736,ENSMUSP00000047275,ENSMUSP00000083587,ENSMUSP00000126067,ENSMUSP00000007799,ENSMUSP00000150618,ENSMUSP00000145451,ENSMUSP00000023788,ENSMUSP00000079699,ENSMUSP00000007272,ENSMUSP00000071486,ENSMUSP00000007317,ENSMUSP00000049440,ENSMUSP00000017153,…
4	GO:0099172	presynapse organization	Biological Process	1	ENSMUSP00000126067
4	GO:0099173	postsynapse organization	Biological Process	3	ENSMUSP00000133302,ENSMUSP00000033560,ENSMUSP00000071486
4	GO:0006342	chromatin silencing	Biological Process	3	ENSMUSP00000089948,ENSMUSP00000133279,ENSMUSP00000028071
4	GO:0016441	posttranscriptional gene silencing	Biological Process	2	ENSMUSP00000084257,ENSMUSP00000018645
4	GO:0031047	gene silencing by RNA	Biological Process	2	ENSMUSP00000084257,ENSMUSP00000018645
4	GO:0060968	regulation of gene silencing	Biological Process	3	ENSMUSP00000133279,ENSMUSP00000084257,ENSMUSP00000018645
4	GO:0060969	negative regulation of gene silencing	Biological Process	2	ENSMUSP00000133279,ENSMUSP00000018645
4	GO:0045454	cell redox homeostasis	Biological Process	3	ENSMUSP00000025476,ENSMUSP00000035658,ENSMUSP00000141022
4	GO:0006884	cell volume homeostasis	Biological Process	1	ENSMUSP00000038106
4	GO:0046716	muscle cell cellular homeostasis	Biological Process	2	ENSMUSP00000062277,ENSMUSP00000028515
4	GO:0055082	cellular chemical homeostasis	Biological Process	30	ENSMUSP00000062576,ENSMUSP00000133302,ENSMUSP00000039600,ENSMUSP00000023832,ENSMUSP00000007799,ENSMUSP00000001008,ENSMUSP00000104485,ENSMUSP00000042918,ENSMUSP00000048770,ENSMUSP00000034214,ENSMUSP00000029900,ENSMUSP00000024932,ENSMUSP00000080974,ENSMUSP00000028881,ENSMUSP00000031327,ENSMUSP00000064536,ENSMUSP00000020964,ENSMUSP00000074885,ENSMUSP00000015596,ENSMUSP00000001304,ENSMUSP00000037206,…
4	GO:0070050	neuron cellular homeostasis	Biological Process	1	ENSMUSP00000028515
4	GO:0000910	cytokinesis	Biological Process	2	ENSMUSP00000030636,ENSMUSP00000047700
4	GO:0007050	cell cycle arrest	Biological Process	3	ENSMUSP00000037000,ENSMUSP00000104548,ENSMUSP00000112600
4	GO:0007051	spindle organization	Biological Process	7	ENSMUSP00000030636,ENSMUSP00000033282,ENSMUSP00000022784,ENSMUSP00000018645,ENSMUSP00000049973,ENSMUSP00000000776,ENSMUSP00000111309
4	GO:0007062	sister chromatid cohesion	Biological Process	1	ENSMUSP00000136323
4	GO:0007098	centrosome cycle	Biological Process	6	ENSMUSP00000006625,ENSMUSP00000111309,ENSMUSP00000037000,ENSMUSP00000062637,ENSMUSP00000022784,ENSMUSP00000049973
4	GO:0007099	centriole replication	Biological Process	2	ENSMUSP00000006625,ENSMUSP00000062637
4	GO:0010564	regulation of cell cycle process	Biological Process	14	ENSMUSP00000030622,ENSMUSP00000031072,ENSMUSP00000057573,ENSMUSP00000025263,ENSMUSP00000028881,ENSMUSP00000028882,ENSMUSP00000006625,ENSMUSP00000111309,ENSMUSP00000037000,ENSMUSP00000035179,ENSMUSP00000019470,ENSMUSP00000031840,ENSMUSP00000027367,ENSMUSP00000025779
4	GO:0010948	negative regulation of cell cycle process	Biological Process	6	ENSMUSP00000030622,ENSMUSP00000057573,ENSMUSP00000006625,ENSMUSP00000031840,ENSMUSP00000027367,ENSMUSP00000025779
4	GO:0051300	spindle pole body organization	Biological Process	1	ENSMUSP00000022009
4	GO:0032506	cytokinetic process	Biological Process	1	ENSMUSP00000047700
4	GO:0044770	cell cycle phase transition	Biological Process	11	ENSMUSP00000071715,ENSMUSP00000094225,ENSMUSP00000061305,ENSMUSP00000030622,ENSMUSP00000047700,ENSMUSP00000031072,ENSMUSP00000057573,ENSMUSP00000019470,ENSMUSP00000031840,ENSMUSP00000027367,ENSMUSP00000025779
4	GO:0051298	centrosome duplication	Biological Process	2	ENSMUSP00000006625,ENSMUSP00000062637
4	GO:0051299	centrosome separation	Biological Process	1	ENSMUSP00000111309
4	GO:0051653	spindle localization	Biological Process	3	ENSMUSP00000127990,ENSMUSP00000033282,ENSMUSP00000037000
4	GO:0061511	centriole elongation	Biological Process	1	ENSMUSP00000062637
4	GO:0090068	positive regulation of cell cycle process	Biological Process	6	ENSMUSP00000025263,ENSMUSP00000028881,ENSMUSP00000028882,ENSMUSP00000031072,ENSMUSP00000111309,ENSMUSP00000035179
4	GO:1903047	mitotic cell cycle process	Biological Process	21	ENSMUSP00000071715,ENSMUSP00000094225,ENSMUSP00000061305,ENSMUSP00000127990,ENSMUSP00000033282,ENSMUSP00000037000,ENSMUSP00000030636,ENSMUSP00000047700,ENSMUSP00000030622,ENSMUSP00000031072,ENSMUSP00000057573,ENSMUSP00000025263,ENSMUSP00000028881,ENSMUSP00000028882,ENSMUSP00000111309,ENSMUSP00000000776,ENSMUSP00000022009,ENSMUSP00000019470,ENSMUSP00000031840,ENSMUSP00000027367,ENSMUSP00000025779
4	GO:0022614	membrane to membrane docking	Biological Process	1	ENSMUSP00000083587
4	GO:0140056	organelle localization by membrane tethering	Biological Process	1	ENSMUSP00000089051
4	GO:0007281	germ cell development	Biological Process	2	ENSMUSP00000094211,ENSMUSP00000085423
4	GO:0007342	fusion of sperm to egg plasma membrane involved in single fertilization	Biological Process	1	ENSMUSP00000091692
4	GO:0009994	oocyte differentiation	Biological Process	1	ENSMUSP00000085423
4	GO:0048515	spermatid differentiation	Biological Process	1	ENSMUSP00000094211
4	GO:0030036	actin cytoskeleton organization	Biological Process	21	ENSMUSP00000062277,ENSMUSP00000103546,ENSMUSP00000033721,ENSMUSP00000096152,ENSMUSP00000087736,ENSMUSP00000047275,ENSMUSP00000083587,ENSMUSP00000025263,ENSMUSP00000053394,ENSMUSP00000029711,ENSMUSP00000028882,ENSMUSP00000045527,ENSMUSP00000145451,ENSMUSP00000071486,ENSMUSP00000007317,ENSMUSP00000049440,ENSMUSP00000017153,ENSMUSP00000030636,ENSMUSP00000025523,ENSMUSP00000085566,ENSMUSP00000033560
4	GO:0032970	regulation of actin filament-based process	Biological Process	11	ENSMUSP00000047275,ENSMUSP00000083587,ENSMUSP00000028882,ENSMUSP00000045527,ENSMUSP00000049440,ENSMUSP00000017153,ENSMUSP00000030636,ENSMUSP00000033721,ENSMUSP00000096152,ENSMUSP00000007799,ENSMUSP00000025523
4	GO:0023061	signal release	Biological Process	16	ENSMUSP00000126067,ENSMUSP00000089051,ENSMUSP00000025263,ENSMUSP00000018610,ENSMUSP00000028881,ENSMUSP00000039600,ENSMUSP00000020278,ENSMUSP00000038502,ENSMUSP00000020964,ENSMUSP00000020312,ENSMUSP00000064536,ENSMUSP00000059977,ENSMUSP00000092041,ENSMUSP00000022176,ENSMUSP00000058042,ENSMUSP00000141648
4	GO:0006887	exocytosis	Biological Process	9	ENSMUSP00000089051,ENSMUSP00000038502,ENSMUSP00000001008,ENSMUSP00000126067,ENSMUSP00000141648,ENSMUSP00000035898,ENSMUSP00000017153,ENSMUSP00000105415,ENSMUSP00000039600
4	GO:0009306	protein secretion	Biological Process	33	ENSMUSP00000025263,ENSMUSP00000018610,ENSMUSP00000028881,ENSMUSP00000039600,ENSMUSP00000038502,ENSMUSP00000020964,ENSMUSP00000020312,ENSMUSP00000064536,ENSMUSP00000028259,ENSMUSP00000080974,ENSMUSP00000087587,ENSMUSP00000020970,ENSMUSP00000019997,ENSMUSP00000141648,ENSMUSP00000028882,ENSMUSP00000056669,ENSMUSP00000027015,ENSMUSP00000121848,ENSMUSP00000032239,ENSMUSP00000035898,ENSMUSP00000090121,…
4	GO:0014047	glutamate secretion	Biological Process	3	ENSMUSP00000126067,ENSMUSP00000028881,ENSMUSP00000089051
4	GO:0050432	catecholamine secretion	Biological Process	4	ENSMUSP00000059977,ENSMUSP00000126067,ENSMUSP00000099907,ENSMUSP00000000175
4	GO:0070278	extracellular matrix constituent secretion	Biological Process	1	ENSMUSP00000022576
4	GO:1903530	regulation of secretion by cell	Biological Process	36	ENSMUSP00000126067,ENSMUSP00000025263,ENSMUSP00000022576,ENSMUSP00000018610,ENSMUSP00000028881,ENSMUSP00000039600,ENSMUSP00000059977,ENSMUSP00000089051,ENSMUSP00000020278,ENSMUSP00000020312,ENSMUSP00000064536,ENSMUSP00000099907,ENSMUSP00000028259,ENSMUSP00000141648,ENSMUSP00000035898,ENSMUSP00000038502,ENSMUSP00000000175,ENSMUSP00000020970,ENSMUSP00000019997,ENSMUSP00000028882,ENSMUSP00000056669,…
4	GO:1903531	negative regulation of secretion by cell	Biological Process	11	ENSMUSP00000025263,ENSMUSP00000059977,ENSMUSP00000028881,ENSMUSP00000020278,ENSMUSP00000126067,ENSMUSP00000020970,ENSMUSP00000019997,ENSMUSP00000022176,ENSMUSP00000020964,ENSMUSP00000058042,ENSMUSP00000054499
4	GO:1903532	positive regulation of secretion by cell	Biological Process	24	ENSMUSP00000126067,ENSMUSP00000022576,ENSMUSP00000020278,ENSMUSP00000020312,ENSMUSP00000064536,ENSMUSP00000099907,ENSMUSP00000028259,ENSMUSP00000089051,ENSMUSP00000141648,ENSMUSP00000035898,ENSMUSP00000028882,ENSMUSP00000056669,ENSMUSP00000080974,ENSMUSP00000027015,ENSMUSP00000025263,ENSMUSP00000121848,ENSMUSP00000032239,ENSMUSP00000090121,ENSMUSP00000001008,ENSMUSP00000025523,ENSMUSP00000028233,…
4	GO:0043482	cellular pigment accumulation	Biological Process	1	ENSMUSP00000036614
4	GO:0051875	pigment granule localization	Biological Process	1	ENSMUSP00000036614
4	GO:0039528	cytoplasmic pattern recognition receptor signaling pathway in response to virus	Biological Process	1	ENSMUSP00000028259
4	GO:0045104	intermediate filament cytoskeleton organization	Biological Process	5	ENSMUSP00000023788,ENSMUSP00000079699,ENSMUSP00000007272,ENSMUSP00000041347,ENSMUSP00000007280
4	GO:0010524	positive regulation of calcium ion transport into cytosol	Biological Process	2	ENSMUSP00000126067,ENSMUSP00000007799
4	GO:0045597	positive regulation of cell differentiation	Biological Process	43	ENSMUSP00000028881,ENSMUSP00000015596,ENSMUSP00000080974,ENSMUSP00000087119,ENSMUSP00000133302,ENSMUSP00000111309,ENSMUSP00000127990,ENSMUSP00000058629,ENSMUSP00000037028,ENSMUSP00000000769,ENSMUSP00000051492,ENSMUSP00000104548,ENSMUSP00000028071,ENSMUSP00000033427,ENSMUSP00000015540,ENSMUSP00000103056,ENSMUSP00000095171,ENSMUSP00000069850,ENSMUSP00000050374,ENSMUSP00000082548,ENSMUSP00000062277,…
4	GO:0051284	positive regulation of sequestering of calcium ion	Biological Process	1	ENSMUSP00000020964
4	GO:0051781	positive regulation of cell division	Biological Process	2	ENSMUSP00000028881,ENSMUSP00000028882
4	GO:0060148	positive regulation of posttranscriptional gene silencing	Biological Process	1	ENSMUSP00000084257
4	GO:0060355	positive regulation of cell adhesion molecule production	Biological Process	1	ENSMUSP00000007799
4	GO:0106022	positive regulation of vesicle docking	Biological Process	1	ENSMUSP00000089051
4	GO:1900078	positive regulation of cellular response to insulin stimulus	Biological Process	2	ENSMUSP00000062576,ENSMUSP00000103056
4	GO:1900409	positive regulation of cellular response to oxidative stress	Biological Process	2	ENSMUSP00000025263,ENSMUSP00000023832
4	GO:1901381	positive regulation of potassium ion transmembrane transport	Biological Process	1	ENSMUSP00000015596
4	GO:1905898	positive regulation of response to endoplasmic reticulum stress	Biological Process	1	ENSMUSP00000112675
4	GO:2000470	positive regulation of peroxidase activity	Biological Process	1	ENSMUSP00000126067
4	GO:2001022	positive regulation of response to DNA damage stimulus	Biological Process	1	ENSMUSP00000035179
4	GO:0007162	negative regulation of cell adhesion	Biological Process	16	ENSMUSP00000139147,ENSMUSP00000109884,ENSMUSP00000019997,ENSMUSP00000031840,ENSMUSP00000016640,ENSMUSP00000122787,ENSMUSP00000017153,ENSMUSP00000069850,ENSMUSP00000103056,ENSMUSP00000095171,ENSMUSP00000104548,ENSMUSP00000087119,ENSMUSP00000033721,ENSMUSP00000141648,ENSMUSP00000112675,ENSMUSP00000015596
4	GO:0010523	negative regulation of calcium ion transport into cytosol	Biological Process	1	ENSMUSP00000020964
4	GO:0031642	negative regulation of myelination	Biological Process	1	ENSMUSP00000025263
4	GO:0045596	negative regulation of cell differentiation	Biological Process	26	ENSMUSP00000133302,ENSMUSP00000099907,ENSMUSP00000099534,ENSMUSP00000007799,ENSMUSP00000109884,ENSMUSP00000103056,ENSMUSP00000110232,ENSMUSP00000095171,ENSMUSP00000104548,ENSMUSP00000069851,ENSMUSP00000112675,ENSMUSP00000025263,ENSMUSP00000021970,ENSMUSP00000019266,ENSMUSP00000133360,ENSMUSP00000028881,ENSMUSP00000027367,ENSMUSP00000032260,ENSMUSP00000001008,ENSMUSP00000035167,ENSMUSP00000127990,…
4	GO:0051283	negative regulation of sequestering of calcium ion	Biological Process	4	ENSMUSP00000020964,ENSMUSP00000001008,ENSMUSP00000037206,ENSMUSP00000126067
4	GO:0090071	negative regulation of ribosome biogenesis	Biological Process	1	ENSMUSP00000035179
4	GO:0090288	negative regulation of cellular response to growth factor stimulus	Biological Process	3	ENSMUSP00000047333,ENSMUSP00000007799,ENSMUSP00000058629
4	GO:1900077	negative regulation of cellular response to insulin stimulus	Biological Process	4	ENSMUSP00000028881,ENSMUSP00000127716,ENSMUSP00000112675,ENSMUSP00000023583
4	GO:1900408	negative regulation of cellular response to oxidative stress	Biological Process	1	ENSMUSP00000058629
4	GO:1901380	negative regulation of potassium ion transmembrane transport	Biological Process	1	ENSMUSP00000007799
4	GO:1903573	negative regulation of response to endoplasmic reticulum stress	Biological Process	1	ENSMUSP00000043245
4	GO:1903973	negative regulation of cellular response to macrophage colony-stimulating factor stimulus	Biological Process	1	ENSMUSP00000112675
4	GO:2001021	negative regulation of response to DNA damage stimulus	Biological Process	2	ENSMUSP00000095171,ENSMUSP00000062277
4	GO:0001708	cell fate specification	Biological Process	1	ENSMUSP00000109884
4	GO:0007569	cell aging	Biological Process	3	ENSMUSP00000020931,ENSMUSP00000007799,ENSMUSP00000144369
4	GO:0010623	programmed cell death involved in cell development	Biological Process	2	ENSMUSP00000028881,ENSMUSP00000028882
4	GO:0030154	cell differentiation	Biological Process	119	ENSMUSP00000064680,ENSMUSP00000007799,ENSMUSP00000083810,ENSMUSP00000031840,ENSMUSP00000064536,ENSMUSP00000001008,ENSMUSP00000109794,ENSMUSP00000103056,ENSMUSP00000004968,ENSMUSP00000121848,ENSMUSP00000067002,ENSMUSP00000148145,ENSMUSP00000032239,ENSMUSP00000122787,ENSMUSP00000019997,ENSMUSP00000050374,ENSMUSP00000085423,ENSMUSP00000094211,ENSMUSP00000043088,ENSMUSP00000030636,ENSMUSP00000025523,…
4	GO:0045165	cell fate commitment	Biological Process	4	ENSMUSP00000122787,ENSMUSP00000109884,ENSMUSP00000069850,ENSMUSP00000103056
4	GO:0048468	cell development	Biological Process	62	ENSMUSP00000109794,ENSMUSP00000004968,ENSMUSP00000064536,ENSMUSP00000121848,ENSMUSP00000050374,ENSMUSP00000085423,ENSMUSP00000094211,ENSMUSP00000030636,ENSMUSP00000025523,ENSMUSP00000089051,ENSMUSP00000099907,ENSMUSP00000133302,ENSMUSP00000111309,ENSMUSP00000127990,ENSMUSP00000058629,ENSMUSP00000037028,ENSMUSP00000000769,ENSMUSP00000051492,ENSMUSP00000099534,ENSMUSP00000033800,ENSMUSP00000015596,…
4	GO:0048469	cell maturation	Biological Process	5	ENSMUSP00000064536,ENSMUSP00000026972,ENSMUSP00000141648,ENSMUSP00000082777,ENSMUSP00000047333
4	GO:0003254	regulation of membrane depolarization	Biological Process	1	ENSMUSP00000064536
4	GO:0010522	regulation of calcium ion transport into cytosol	Biological Process	4	ENSMUSP00000007799,ENSMUSP00000020964,ENSMUSP00000126067,ENSMUSP00000037206
4	GO:0031641	regulation of myelination	Biological Process	1	ENSMUSP00000025263
4	GO:0045595	regulation of cell differentiation	Biological Process	63	ENSMUSP00000028881,ENSMUSP00000015596,ENSMUSP00000080974,ENSMUSP00000087119,ENSMUSP00000133302,ENSMUSP00000111309,ENSMUSP00000127990,ENSMUSP00000058629,ENSMUSP00000037028,ENSMUSP00000000769,ENSMUSP00000051492,ENSMUSP00000099907,ENSMUSP00000099534,ENSMUSP00000052465,ENSMUSP00000007799,ENSMUSP00000104548,ENSMUSP00000028071,ENSMUSP00000109884,ENSMUSP00000103056,ENSMUSP00000033427,ENSMUSP00000015540,…
4	GO:0051282	regulation of sequestering of calcium ion	Biological Process	4	ENSMUSP00000020964,ENSMUSP00000001008,ENSMUSP00000037206,ENSMUSP00000126067
4	GO:0051302	regulation of cell division	Biological Process	4	ENSMUSP00000050374,ENSMUSP00000028881,ENSMUSP00000028882,ENSMUSP00000025779
4	GO:0060353	regulation of cell adhesion molecule production	Biological Process	1	ENSMUSP00000007799
4	GO:0060627	regulation of vesicle-mediated transport	Biological Process	21	ENSMUSP00000056715,ENSMUSP00000020653,ENSMUSP00000089051,ENSMUSP00000033900,ENSMUSP00000033560,ENSMUSP00000070868,ENSMUSP00000035898,ENSMUSP00000133302,ENSMUSP00000056669,ENSMUSP00000034713,ENSMUSP00000126067,ENSMUSP00000007799,ENSMUSP00000141648,ENSMUSP00000099534,ENSMUSP00000080974,ENSMUSP00000025263,ENSMUSP00000028881,ENSMUSP00000037028,ENSMUSP00000023583,ENSMUSP00000015596,ENSMUSP00000017153
4	GO:0080135	regulation of cellular response to stress	Biological Process	27	ENSMUSP00000039604,ENSMUSP00000150618,ENSMUSP00000033570,ENSMUSP00000028881,ENSMUSP00000022176,ENSMUSP00000041503,ENSMUSP00000028882,ENSMUSP00000025263,ENSMUSP00000040307,ENSMUSP00000004949,ENSMUSP00000086459,ENSMUSP00000015596,ENSMUSP00000095171,ENSMUSP00000018645,ENSMUSP00000020964,ENSMUSP00000099907,ENSMUSP00000023832,ENSMUSP00000035065,ENSMUSP00000062277,ENSMUSP00000112675,ENSMUSP00000058629,…
4	GO:0090287	regulation of cellular response to growth factor stimulus	Biological Process	4	ENSMUSP00000047333,ENSMUSP00000007799,ENSMUSP00000058629,ENSMUSP00000026972
4	GO:1900076	regulation of cellular response to insulin stimulus	Biological Process	6	ENSMUSP00000062576,ENSMUSP00000028881,ENSMUSP00000127716,ENSMUSP00000112675,ENSMUSP00000023583,ENSMUSP00000103056
4	GO:1901379	regulation of potassium ion transmembrane transport	Biological Process	2	ENSMUSP00000015596,ENSMUSP00000007799
4	GO:1903972	regulation of cellular response to macrophage colony-stimulating factor stimulus	Biological Process	1	ENSMUSP00000112675
4	GO:1905890	regulation of cellular response to very-low-density lipoprotein particle stimulus	Biological Process	1	ENSMUSP00000133302
4	GO:2000468	regulation of peroxidase activity	Biological Process	1	ENSMUSP00000126067
4	GO:0010481	epidermal cell division	Biological Process	1	ENSMUSP00000050374
4	GO:0017145	stem cell division	Biological Process	3	ENSMUSP00000028071,ENSMUSP00000109884,ENSMUSP00000025779
4	GO:0032507	maintenance of protein location in cell	Biological Process	3	ENSMUSP00000002855,ENSMUSP00000144369,ENSMUSP00000007799
4	GO:0033554	cellular response to stress	Biological Process	58	ENSMUSP00000062576,ENSMUSP00000020931,ENSMUSP00000018985,ENSMUSP00000033282,ENSMUSP00000138108,ENSMUSP00000092673,ENSMUSP00000051492,ENSMUSP00000019882,ENSMUSP00000000505,ENSMUSP00000047333,ENSMUSP00000002737,ENSMUSP00000004949,ENSMUSP00000061899,ENSMUSP00000057573,ENSMUSP00000030622,ENSMUSP00000025263,ENSMUSP00000074471,ENSMUSP00000040307,ENSMUSP00000039604,ENSMUSP00000050374,ENSMUSP00000117229,…
4	GO:0070887	cellular response to chemical stimulus	Biological Process	120	ENSMUSP00000007799,ENSMUSP00000095171,ENSMUSP00000039600,ENSMUSP00000019266,ENSMUSP00000001008,ENSMUSP00000041175,ENSMUSP00000132180,ENSMUSP00000026211,ENSMUSP00000034026,ENSMUSP00000145451,ENSMUSP00000023809,ENSMUSP00000086094,ENSMUSP00000112675,ENSMUSP00000029711,ENSMUSP00000051492,ENSMUSP00000041503,ENSMUSP00000015596,ENSMUSP00000028233,ENSMUSP00000019064,ENSMUSP00000025523,ENSMUSP00000028881,…
4	GO:0071216	cellular response to biotic stimulus	Biological Process	21	ENSMUSP00000056669,ENSMUSP00000025263,ENSMUSP00000024791,ENSMUSP00000028881,ENSMUSP00000039600,ENSMUSP00000001008,ENSMUSP00000022124,ENSMUSP00000004949,ENSMUSP00000080974,ENSMUSP00000022722,ENSMUSP00000132435,ENSMUSP00000027015,ENSMUSP00000019997,ENSMUSP00000018610,ENSMUSP00000031327,ENSMUSP00000016640,ENSMUSP00000019064,ENSMUSP00000104272,ENSMUSP00000087405,ENSMUSP00000069850,ENSMUSP00000074885
4	GO:0071402	cellular response to lipoprotein particle stimulus	Biological Process	3	ENSMUSP00000080974,ENSMUSP00000034713,ENSMUSP00000133302
4	GO:0104004	cellular response to environmental stimulus	Biological Process	8	ENSMUSP00000035065,ENSMUSP00000028881,ENSMUSP00000007799,ENSMUSP00000104548,ENSMUSP00000137253,ENSMUSP00000064536,ENSMUSP00000029711,ENSMUSP00000062576
4	GO:0006914	autophagy	Biological Process	16	ENSMUSP00000026173,ENSMUSP00000045201,ENSMUSP00000147061,ENSMUSP00000015981,ENSMUSP00000027015,ENSMUSP00000063390,ENSMUSP00000019997,ENSMUSP00000033264,ENSMUSP00000015596,ENSMUSP00000035658,ENSMUSP00000008748,ENSMUSP00000065423,ENSMUSP00000126067,ENSMUSP00000039604,ENSMUSP00000127646,ENSMUSP00000139608
4	GO:0071805	potassium ion transmembrane transport	Biological Process	4	ENSMUSP00000038106,ENSMUSP00000015596,ENSMUSP00000007799,ENSMUSP00000018614
4	GO:0006904	vesicle docking involved in exocytosis	Biological Process	1	ENSMUSP00000089051
4	GO:0016082	synaptic vesicle priming	Biological Process	1	ENSMUSP00000089051
4	GO:0099500	vesicle fusion to plasma membrane	Biological Process	1	ENSMUSP00000089051
4	GO:0098869	cellular oxidant detoxification	Biological Process	9	ENSMUSP00000025263,ENSMUSP00000023832,ENSMUSP00000080974,ENSMUSP00000087405,ENSMUSP00000133302,ENSMUSP00000035065,ENSMUSP00000090897,ENSMUSP00000059977,ENSMUSP00000071130
4	GO:0001892	embryonic placenta development	Biological Process	3	ENSMUSP00000007317,ENSMUSP00000064680,ENSMUSP00000069850
4	GO:0001893	maternal placenta development	Biological Process	3	ENSMUSP00000035065,ENSMUSP00000070868,ENSMUSP00000064680
4	GO:0007530	sex determination	Biological Process	3	ENSMUSP00000086459,ENSMUSP00000121309,ENSMUSP00000029711
4	GO:0007548	sex differentiation	Biological Process	11	ENSMUSP00000087119,ENSMUSP00000085423,ENSMUSP00000069850,ENSMUSP00000004910,ENSMUSP00000070868,ENSMUSP00000027053,ENSMUSP00000023583,ENSMUSP00000023809,ENSMUSP00000121309,ENSMUSP00000083587,ENSMUSP00000028882
4	GO:0033327	Leydig cell differentiation	Biological Process	1	ENSMUSP00000121309
4	GO:0035234	ectopic germ cell programmed cell death	Biological Process	2	ENSMUSP00000028881,ENSMUSP00000028882
4	GO:0045137	development of primary sexual characteristics	Biological Process	11	ENSMUSP00000087119,ENSMUSP00000085423,ENSMUSP00000069850,ENSMUSP00000004910,ENSMUSP00000070868,ENSMUSP00000027053,ENSMUSP00000023583,ENSMUSP00000023809,ENSMUSP00000121309,ENSMUSP00000083587,ENSMUSP00000028882
4	GO:0046697	decidualization	Biological Process	3	ENSMUSP00000035065,ENSMUSP00000070868,ENSMUSP00000064680
4	GO:0048608	reproductive structure development	Biological Process	17	ENSMUSP00000087119,ENSMUSP00000085423,ENSMUSP00000069850,ENSMUSP00000004910,ENSMUSP00000070868,ENSMUSP00000086459,ENSMUSP00000027053,ENSMUSP00000023583,ENSMUSP00000023809,ENSMUSP00000086094,ENSMUSP00000121309,ENSMUSP00000035065,ENSMUSP00000064680,ENSMUSP00000007317,ENSMUSP00000000769,ENSMUSP00000083587,ENSMUSP00000028882
4	GO:0060008	Sertoli cell differentiation	Biological Process	2	ENSMUSP00000083587,ENSMUSP00000028882
4	GO:0060009	Sertoli cell development	Biological Process	2	ENSMUSP00000083587,ENSMUSP00000028882
4	GO:0060674	placenta blood vessel development	Biological Process	1	ENSMUSP00000064680
4	GO:0060706	cell differentiation involved in embryonic placenta development	Biological Process	1	ENSMUSP00000007317
4	GO:0007338	single fertilization	Biological Process	2	ENSMUSP00000127646,ENSMUSP00000091692
4	GO:0001542	ovulation from ovarian follicle	Biological Process	1	ENSMUSP00000070868
4	GO:0007339	binding of sperm to zona pellucida	Biological Process	1	ENSMUSP00000127646
4	GO:0007565	female pregnancy	Biological Process	5	ENSMUSP00000035065,ENSMUSP00000032228,ENSMUSP00000070868,ENSMUSP00000064680,ENSMUSP00000034026
4	GO:0007567	parturition	Biological Process	1	ENSMUSP00000034026
4	GO:0030728	ovulation	Biological Process	4	ENSMUSP00000070868,ENSMUSP00000035065,ENSMUSP00000028881,ENSMUSP00000034026
4	GO:0060135	maternal process involved in female pregnancy	Biological Process	3	ENSMUSP00000035065,ENSMUSP00000070868,ENSMUSP00000064680
4	GO:0060136	embryonic process involved in female pregnancy	Biological Process	1	ENSMUSP00000064680
4	GO:0060768	regulation of epithelial cell proliferation involved in prostate gland development	Biological Process	1	ENSMUSP00000000769
4	GO:0060770	negative regulation of epithelial cell proliferation involved in prostate gland development	Biological Process	1	ENSMUSP00000000769
4	GO:0045132	meiotic chromosome segregation	Biological Process	1	ENSMUSP00000136323
4	GO:0061983	meiosis II cell cycle process	Biological Process	1	ENSMUSP00000136323
4	GO:0070192	chromosome organization involved in meiotic cell cycle	Biological Process	1	ENSMUSP00000136323
4	GO:0140013	meiotic nuclear division	Biological Process	1	ENSMUSP00000136323
4	GO:1905939	regulation of gonad development	Biological Process	1	ENSMUSP00000028882
4	GO:1905940	negative regulation of gonad development	Biological Process	1	ENSMUSP00000028882
4	GO:0031589	cell-substrate adhesion	Biological Process	10	ENSMUSP00000139147,ENSMUSP00000080974,ENSMUSP00000054499,ENSMUSP00000141648,ENSMUSP00000145451,ENSMUSP00000109884,ENSMUSP00000033721,ENSMUSP00000017153,ENSMUSP00000087119,ENSMUSP00000117834
4	GO:0033627	cell adhesion mediated by integrin	Biological Process	3	ENSMUSP00000044050,ENSMUSP00000039600,ENSMUSP00000083587
4	GO:0098609	cell-cell adhesion	Biological Process	29	ENSMUSP00000074340,ENSMUSP00000083587,ENSMUSP00000039600,ENSMUSP00000106087,ENSMUSP00000016640,ENSMUSP00000122787,ENSMUSP00000007799,ENSMUSP00000044050,ENSMUSP00000028881,ENSMUSP00000028071,ENSMUSP00000065719,ENSMUSP00000033053,ENSMUSP00000019997,ENSMUSP00000025263,ENSMUSP00000141648,ENSMUSP00000033427,ENSMUSP00000004949,ENSMUSP00000015596,ENSMUSP00000031840,ENSMUSP00000017153,ENSMUSP00000069850,…
4	GO:0044650	adhesion of symbiont to host cell	Biological Process	1	ENSMUSP00000083587
4	GO:0035425	autocrine signaling	Biological Process	1	ENSMUSP00000058629
4	GO:0099536	synaptic signaling	Biological Process	16	ENSMUSP00000126067,ENSMUSP00000028515,ENSMUSP00000089051,ENSMUSP00000096152,ENSMUSP00000020278,ENSMUSP00000038502,ENSMUSP00000035065,ENSMUSP00000028881,ENSMUSP00000025263,ENSMUSP00000033560,ENSMUSP00000053394,ENSMUSP00000043088,ENSMUSP00000137310,ENSMUSP00000015596,ENSMUSP00000133302,ENSMUSP00000015981
4	GO:0198738	cell-cell signaling by wnt	Biological Process	9	ENSMUSP00000023788,ENSMUSP00000058629,ENSMUSP00000109884,ENSMUSP00000035167,ENSMUSP00000065719,ENSMUSP00000024932,ENSMUSP00000019997,ENSMUSP00000133302,ENSMUSP00000007799
4	GO:1905114	cell surface receptor signaling pathway involved in cell-cell signaling	Biological Process	12	ENSMUSP00000023788,ENSMUSP00000058629,ENSMUSP00000109884,ENSMUSP00000035167,ENSMUSP00000065719,ENSMUSP00000024932,ENSMUSP00000019997,ENSMUSP00000126067,ENSMUSP00000028515,ENSMUSP00000133302,ENSMUSP00000007799,ENSMUSP00000053394
4	GO:0001881	receptor recycling	Biological Process	2	ENSMUSP00000126067,ENSMUSP00000021963
4	GO:0001919	regulation of receptor recycling	Biological Process	1	ENSMUSP00000126067
4	GO:0046883	regulation of hormone secretion	Biological Process	12	ENSMUSP00000025263,ENSMUSP00000018610,ENSMUSP00000028881,ENSMUSP00000039600,ENSMUSP00000020278,ENSMUSP00000020312,ENSMUSP00000064536,ENSMUSP00000059977,ENSMUSP00000022176,ENSMUSP00000020964,ENSMUSP00000058042,ENSMUSP00000141648
4	GO:0099177	regulation of trans-synaptic signaling	Biological Process	12	ENSMUSP00000126067,ENSMUSP00000089051,ENSMUSP00000020278,ENSMUSP00000035065,ENSMUSP00000038502,ENSMUSP00000028881,ENSMUSP00000025263,ENSMUSP00000033560,ENSMUSP00000053394,ENSMUSP00000015596,ENSMUSP00000133302,ENSMUSP00000015981
4	GO:1903779	regulation of cardiac conduction	Biological Process	1	ENSMUSP00000007799
4	GO:0001921	positive regulation of receptor recycling	Biological Process	1	ENSMUSP00000126067
4	GO:0046887	positive regulation of hormone secretion	Biological Process	5	ENSMUSP00000020278,ENSMUSP00000020312,ENSMUSP00000064536,ENSMUSP00000141648,ENSMUSP00000028881
4	GO:0050806	positive regulation of synaptic transmission	Biological Process	8	ENSMUSP00000126067,ENSMUSP00000020278,ENSMUSP00000035065,ENSMUSP00000015596,ENSMUSP00000133302,ENSMUSP00000015981,ENSMUSP00000089051,ENSMUSP00000025263
4	GO:0046888	negative regulation of hormone secretion	Biological Process	6	ENSMUSP00000059977,ENSMUSP00000020278,ENSMUSP00000022176,ENSMUSP00000020964,ENSMUSP00000028881,ENSMUSP00000058042
4	GO:0050805	negative regulation of synaptic transmission	Biological Process	6	ENSMUSP00000035065,ENSMUSP00000089051,ENSMUSP00000126067,ENSMUSP00000053394,ENSMUSP00000015596,ENSMUSP00000028881
4	GO:0061337	cardiac conduction	Biological Process	2	ENSMUSP00000064536,ENSMUSP00000007799
4	GO:0001649	osteoblast differentiation	Biological Process	10	ENSMUSP00000121848,ENSMUSP00000058629,ENSMUSP00000025263,ENSMUSP00000026972,ENSMUSP00000064536,ENSMUSP00000148145,ENSMUSP00000069850,ENSMUSP00000031840,ENSMUSP00000064680,ENSMUSP00000001008
4	GO:0030278	regulation of ossification	Biological Process	8	ENSMUSP00000064536,ENSMUSP00000026972,ENSMUSP00000082548,ENSMUSP00000023583,ENSMUSP00000025263,ENSMUSP00000148145,ENSMUSP00000069850,ENSMUSP00000020970
4	GO:0030279	negative regulation of ossification	Biological Process	2	ENSMUSP00000023583,ENSMUSP00000025263
4	GO:0030282	bone mineralization	Biological Process	6	ENSMUSP00000064536,ENSMUSP00000026972,ENSMUSP00000082548,ENSMUSP00000023583,ENSMUSP00000031840,ENSMUSP00000035065
4	GO:0036075	replacement ossification	Biological Process	1	ENSMUSP00000087119
4	GO:0045778	positive regulation of ossification	Biological Process	5	ENSMUSP00000026972,ENSMUSP00000082548,ENSMUSP00000064536,ENSMUSP00000148145,ENSMUSP00000069850
4	GO:0048755	branching morphogenesis of a nerve	Biological Process	2	ENSMUSP00000099907,ENSMUSP00000028881
4	GO:0060688	regulation of morphogenesis of a branching structure	Biological Process	3	ENSMUSP00000025263,ENSMUSP00000099907,ENSMUSP00000028881
4	GO:0061138	morphogenesis of a branching epithelium	Biological Process	3	ENSMUSP00000087119,ENSMUSP00000027053,ENSMUSP00000025263
4	GO:0001817	regulation of cytokine production	Biological Process	40	ENSMUSP00000031840,ENSMUSP00000025263,ENSMUSP00000099534,ENSMUSP00000033427,ENSMUSP00000040307,ENSMUSP00000004949,ENSMUSP00000035065,ENSMUSP00000028881,ENSMUSP00000028882,ENSMUSP00000028233,ENSMUSP00000056669,ENSMUSP00000104548,ENSMUSP00000082548,ENSMUSP00000022830,ENSMUSP00000085293,ENSMUSP00000016640,ENSMUSP00000019997,ENSMUSP00000015596,ENSMUSP00000015540,ENSMUSP00000088291,ENSMUSP00000028259,…
4	GO:0001818	negative regulation of cytokine production	Biological Process	9	ENSMUSP00000025263,ENSMUSP00000016640,ENSMUSP00000019997,ENSMUSP00000015596,ENSMUSP00000015540,ENSMUSP00000088291,ENSMUSP00000031840,ENSMUSP00000039604,ENSMUSP00000054499
4	GO:0001819	positive regulation of cytokine production	Biological Process	31	ENSMUSP00000099534,ENSMUSP00000033427,ENSMUSP00000040307,ENSMUSP00000004949,ENSMUSP00000035065,ENSMUSP00000028881,ENSMUSP00000028882,ENSMUSP00000028233,ENSMUSP00000056669,ENSMUSP00000104548,ENSMUSP00000025263,ENSMUSP00000028259,ENSMUSP00000015540,ENSMUSP00000080974,ENSMUSP00000015596,ENSMUSP00000069850,ENSMUSP00000001008,ENSMUSP00000122787,ENSMUSP00000054637,ENSMUSP00000027015,ENSMUSP00000121848,…
4	GO:0002534	cytokine production involved in inflammatory response	Biological Process	2	ENSMUSP00000018610,ENSMUSP00000087587
4	GO:0010573	vascular endothelial growth factor production	Biological Process	4	ENSMUSP00000035065,ENSMUSP00000028881,ENSMUSP00000028882,ENSMUSP00000028233
4	GO:0032602	chemokine production	Biological Process	9	ENSMUSP00000025263,ENSMUSP00000028881,ENSMUSP00000015596,ENSMUSP00000039604,ENSMUSP00000025523,ENSMUSP00000028233,ENSMUSP00000062277,ENSMUSP00000095171,ENSMUSP00000039600
4	GO:0032604	granulocyte macrophage colony-stimulating factor production	Biological Process	1	ENSMUSP00000028881
4	GO:0032606	type I interferon production	Biological Process	3	ENSMUSP00000056669,ENSMUSP00000104548,ENSMUSP00000028259
4	GO:0032609	interferon-gamma production	Biological Process	9	ENSMUSP00000082548,ENSMUSP00000022830,ENSMUSP00000016640,ENSMUSP00000056669,ENSMUSP00000025263,ENSMUSP00000028881,ENSMUSP00000033427,ENSMUSP00000054637,ENSMUSP00000122787
4	GO:0032612	interleukin-1 production	Biological Process	7	ENSMUSP00000027015,ENSMUSP00000028881,ENSMUSP00000085293,ENSMUSP00000019997,ENSMUSP00000080974,ENSMUSP00000087587,ENSMUSP00000001008
4	GO:0032613	interleukin-10 production	Biological Process	4	ENSMUSP00000016640,ENSMUSP00000015596,ENSMUSP00000033427,ENSMUSP00000015540
4	GO:0032615	interleukin-12 production	Biological Process	4	ENSMUSP00000080974,ENSMUSP00000015596,ENSMUSP00000104548,ENSMUSP00000004949
4	GO:0032620	interleukin-17 production	Biological Process	1	ENSMUSP00000103056
4	GO:0032621	interleukin-18 production	Biological Process	2	ENSMUSP00000025263,ENSMUSP00000087587
4	GO:0032623	interleukin-2 production	Biological Process	7	ENSMUSP00000019997,ENSMUSP00000033427,ENSMUSP00000015540,ENSMUSP00000040307,ENSMUSP00000004949,ENSMUSP00000028881,ENSMUSP00000028882
4	GO:0032633	interleukin-4 production	Biological Process	3	ENSMUSP00000015540,ENSMUSP00000033427,ENSMUSP00000069850
4	GO:0032635	interleukin-6 production	Biological Process	9	ENSMUSP00000025263,ENSMUSP00000019997,ENSMUSP00000080974,ENSMUSP00000028881,ENSMUSP00000028882,ENSMUSP00000069850,ENSMUSP00000004949,ENSMUSP00000018610,ENSMUSP00000028259
4	GO:0032637	interleukin-8 production	Biological Process	6	ENSMUSP00000088291,ENSMUSP00000025263,ENSMUSP00000028881,ENSMUSP00000018610,ENSMUSP00000080717,ENSMUSP00000056669
4	GO:0042089	cytokine biosynthetic process	Biological Process	8	ENSMUSP00000122787,ENSMUSP00000054637,ENSMUSP00000025263,ENSMUSP00000028881,ENSMUSP00000104548,ENSMUSP00000004949,ENSMUSP00000028882,ENSMUSP00000069850
4	GO:0050663	cytokine secretion	Biological Process	21	ENSMUSP00000025263,ENSMUSP00000028259,ENSMUSP00000080974,ENSMUSP00000087587,ENSMUSP00000019997,ENSMUSP00000056669,ENSMUSP00000027015,ENSMUSP00000121848,ENSMUSP00000032239,ENSMUSP00000035898,ENSMUSP00000028882,ENSMUSP00000090121,ENSMUSP00000001008,ENSMUSP00000018610,ENSMUSP00000080717,ENSMUSP00000103056,ENSMUSP00000025523,ENSMUSP00000028233,ENSMUSP00000028881,ENSMUSP00000016640,ENSMUSP00000054499
4	GO:0071604	transforming growth factor beta production	Biological Process	1	ENSMUSP00000035065
4	GO:0071706	tumor necrosis factor superfamily cytokine production	Biological Process	9	ENSMUSP00000031840,ENSMUSP00000019997,ENSMUSP00000056669,ENSMUSP00000080974,ENSMUSP00000033427,ENSMUSP00000001008,ENSMUSP00000122787,ENSMUSP00000016640,ENSMUSP00000028259
4	GO:0090269	fibroblast growth factor production	Biological Process	1	ENSMUSP00000035065
4	GO:0090270	regulation of fibroblast growth factor production	Biological Process	1	ENSMUSP00000035065
4	GO:0090360	platelet-derived growth factor production	Biological Process	1	ENSMUSP00000035065
4	GO:0002538	arachidonic acid metabolite production involved in inflammatory response	Biological Process	1	ENSMUSP00000071130
4	GO:0003012	muscle system process	Biological Process	10	ENSMUSP00000028515,ENSMUSP00000103546,ENSMUSP00000037206,ENSMUSP00000096152,ENSMUSP00000020964,ENSMUSP00000007799,ENSMUSP00000035065,ENSMUSP00000059977,ENSMUSP00000020278,ENSMUSP00000087736
4	GO:0003013	circulatory system process	Biological Process	16	ENSMUSP00000007799,ENSMUSP00000020964,ENSMUSP00000080974,ENSMUSP00000064536,ENSMUSP00000083204,ENSMUSP00000035065,ENSMUSP00000059977,ENSMUSP00000087405,ENSMUSP00000133302,ENSMUSP00000004968,ENSMUSP00000020278,ENSMUSP00000018610,ENSMUSP00000083587,ENSMUSP00000141648,ENSMUSP00000087736,ENSMUSP00000022176
4	GO:0003014	renal system process	Biological Process	1	ENSMUSP00000064536
4	GO:0050877	nervous system process	Biological Process	32	ENSMUSP00000069965,ENSMUSP00000027053,ENSMUSP00000091474,ENSMUSP00000026262,ENSMUSP00000083587,ENSMUSP00000102213,ENSMUSP00000080974,ENSMUSP00000149022,ENSMUSP00000150761,ENSMUSP00000143864,ENSMUSP00000096152,ENSMUSP00000015596,ENSMUSP00000035065,ENSMUSP00000022429,ENSMUSP00000059977,ENSMUSP00000027015,ENSMUSP00000028881,ENSMUSP00000069850,ENSMUSP00000000769,ENSMUSP00000133302,ENSMUSP00000034713,…
4	GO:0022600	digestive system process	Biological Process	2	ENSMUSP00000080974,ENSMUSP00000034713
4	GO:0044057	regulation of system process	Biological Process	16	ENSMUSP00000007799,ENSMUSP00000020964,ENSMUSP00000064536,ENSMUSP00000035065,ENSMUSP00000059977,ENSMUSP00000087405,ENSMUSP00000025263,ENSMUSP00000020278,ENSMUSP00000083587,ENSMUSP00000141648,ENSMUSP00000099907,ENSMUSP00000028882,ENSMUSP00000001008,ENSMUSP00000028881,ENSMUSP00000058042,ENSMUSP00000053394
4	GO:0050886	endocrine process	Biological Process	4	ENSMUSP00000020278,ENSMUSP00000092041,ENSMUSP00000028881,ENSMUSP00000058042
4	GO:0009790	embryo development	Biological Process	32	ENSMUSP00000004968,ENSMUSP00000090897,ENSMUSP00000064680,ENSMUSP00000022163,ENSMUSP00000089948,ENSMUSP00000082777,ENSMUSP00000027053,ENSMUSP00000030622,ENSMUSP00000064536,ENSMUSP00000028071,ENSMUSP00000028233,ENSMUSP00000083810,ENSMUSP00000062637,ENSMUSP00000031103,ENSMUSP00000065719,ENSMUSP00000032194,ENSMUSP00000017153,ENSMUSP00000004949,ENSMUSP00000069850,ENSMUSP00000035167,ENSMUSP00000036614,…
4	GO:0007538	primary sex determination	Biological Process	1	ENSMUSP00000086459
4	GO:0018992	germ-line sex determination	Biological Process	1	ENSMUSP00000086459
4	GO:0030238	male sex determination	Biological Process	3	ENSMUSP00000086459,ENSMUSP00000121309,ENSMUSP00000029711
4	GO:0035295	tube development	Biological Process	31	ENSMUSP00000054499,ENSMUSP00000109794,ENSMUSP00000035065,ENSMUSP00000087119,ENSMUSP00000139147,ENSMUSP00000085566,ENSMUSP00000007799,ENSMUSP00000064680,ENSMUSP00000083810,ENSMUSP00000017153,ENSMUSP00000004949,ENSMUSP00000064536,ENSMUSP00000035167,ENSMUSP00000062637,ENSMUSP00000046199,ENSMUSP00000080974,ENSMUSP00000035061,ENSMUSP00000000769,ENSMUSP00000000049,ENSMUSP00000028071,ENSMUSP00000004968,…
4	GO:0046660	female sex differentiation	Biological Process	6	ENSMUSP00000087119,ENSMUSP00000085423,ENSMUSP00000069850,ENSMUSP00000004910,ENSMUSP00000070868,ENSMUSP00000023809
4	GO:0046661	male sex differentiation	Biological Process	6	ENSMUSP00000087119,ENSMUSP00000023583,ENSMUSP00000023809,ENSMUSP00000121309,ENSMUSP00000083587,ENSMUSP00000028882
4	GO:0048731	system development	Biological Process	146	ENSMUSP00000026262,ENSMUSP00000026972,ENSMUSP00000102213,ENSMUSP00000028071,ENSMUSP00000054499,ENSMUSP00000109794,ENSMUSP00000035065,ENSMUSP00000087119,ENSMUSP00000139147,ENSMUSP00000085566,ENSMUSP00000007799,ENSMUSP00000085423,ENSMUSP00000069850,ENSMUSP00000004910,ENSMUSP00000070868,ENSMUSP00000082777,ENSMUSP00000065719,ENSMUSP00000064680,ENSMUSP00000083810,ENSMUSP00000027053,ENSMUSP00000017153,…
4	GO:0048736	appendage development	Biological Process	4	ENSMUSP00000062637,ENSMUSP00000082777,ENSMUSP00000027053,ENSMUSP00000064536
4	GO:2000026	regulation of multicellular organismal development	Biological Process	74	ENSMUSP00000016640,ENSMUSP00000028881,ENSMUSP00000015596,ENSMUSP00000133302,ENSMUSP00000111309,ENSMUSP00000127990,ENSMUSP00000058629,ENSMUSP00000037028,ENSMUSP00000000769,ENSMUSP00000051492,ENSMUSP00000099907,ENSMUSP00000099534,ENSMUSP00000046199,ENSMUSP00000080974,ENSMUSP00000035061,ENSMUSP00000000049,ENSMUSP00000064536,ENSMUSP00000026972,ENSMUSP00000082548,ENSMUSP00000023583,ENSMUSP00000052465,…
4	GO:0003002	regionalization	Biological Process	5	ENSMUSP00000032194,ENSMUSP00000028071,ENSMUSP00000109794,ENSMUSP00000086459,ENSMUSP00000034746
4	GO:0009880	embryonic pattern specification	Biological Process	2	ENSMUSP00000062637,ENSMUSP00000109794
4	GO:0009798	axis specification	Biological Process	2	ENSMUSP00000062637,ENSMUSP00000034746
4	GO:0009799	specification of symmetry	Biological Process	5	ENSMUSP00000064536,ENSMUSP00000035167,ENSMUSP00000062637,ENSMUSP00000036240,ENSMUSP00000086459
4	GO:0060896	neural plate pattern specification	Biological Process	1	ENSMUSP00000062637
4	GO:0044241	lipid digestion	Biological Process	2	ENSMUSP00000080974,ENSMUSP00000034713
4	GO:0097150	neuronal stem cell population maintenance	Biological Process	1	ENSMUSP00000037000
4	GO:0022405	hair cycle process	Biological Process	3	ENSMUSP00000079699,ENSMUSP00000001611,ENSMUSP00000025263
4	GO:0050802	circadian sleep/wake cycle, sleep	Biological Process	1	ENSMUSP00000027015
4	GO:0060156	milk ejection reflex	Biological Process	1	ENSMUSP00000064536
4	GO:0042596	fear response	Biological Process	3	ENSMUSP00000044050,ENSMUSP00000133302,ENSMUSP00000064536
4	GO:0048265	response to pain	Biological Process	1	ENSMUSP00000087405
4	GO:0010984	regulation of lipoprotein particle clearance	Biological Process	1	ENSMUSP00000034713
4	GO:0010986	positive regulation of lipoprotein particle clearance	Biological Process	1	ENSMUSP00000034713
4	GO:0034383	low-density lipoprotein particle clearance	Biological Process	2	ENSMUSP00000080974,ENSMUSP00000034713
4	GO:0034384	high-density lipoprotein particle clearance	Biological Process	2	ENSMUSP00000133302,ENSMUSP00000034713
4	GO:0034447	very-low-density lipoprotein particle clearance	Biological Process	1	ENSMUSP00000133302
4	GO:0071830	triglyceride-rich lipoprotein particle clearance	Biological Process	1	ENSMUSP00000133302
4	GO:0150024	oxidised low-density lipoprotein particle clearance	Biological Process	1	ENSMUSP00000080974
4	GO:0046620	regulation of organ growth	Biological Process	3	ENSMUSP00000033427,ENSMUSP00000064536,ENSMUSP00000082777
4	GO:0046621	negative regulation of organ growth	Biological Process	1	ENSMUSP00000064536
4	GO:0046622	positive regulation of organ growth	Biological Process	1	ENSMUSP00000033427
4	GO:0060419	heart growth	Biological Process	1	ENSMUSP00000064536
4	GO:0042633	hair cycle	Biological Process	6	ENSMUSP00000079699,ENSMUSP00000001611,ENSMUSP00000025263,ENSMUSP00000007272,ENSMUSP00000007280,ENSMUSP00000035065
4	GO:0001974	blood vessel remodeling	Biological Process	1	ENSMUSP00000064536
4	GO:0003294	atrial ventricular junction remodeling	Biological Process	1	ENSMUSP00000064536
4	GO:0034103	regulation of tissue remodeling	Biological Process	5	ENSMUSP00000025523,ENSMUSP00000023583,ENSMUSP00000064536,ENSMUSP00000015596,ENSMUSP00000031840
4	GO:0034104	negative regulation of tissue remodeling	Biological Process	1	ENSMUSP00000015596
4	GO:0034105	positive regulation of tissue remodeling	Biological Process	1	ENSMUSP00000023583
4	GO:0046849	bone remodeling	Biological Process	4	ENSMUSP00000025523,ENSMUSP00000004949,ENSMUSP00000023583,ENSMUSP00000064536
4	GO:0060056	mammary gland involution	Biological Process	1	ENSMUSP00000007799
4	GO:0097709	connective tissue replacement	Biological Process	2	ENSMUSP00000028882,ENSMUSP00000015596
4	GO:0001659	temperature homeostasis	Biological Process	12	ENSMUSP00000028881,ENSMUSP00000028882,ENSMUSP00000035065,ENSMUSP00000025263,ENSMUSP00000039600,ENSMUSP00000080974,ENSMUSP00000119057,ENSMUSP00000064536,ENSMUSP00000007799,ENSMUSP00000069850,ENSMUSP00000103056,ENSMUSP00000023611
4	GO:0001894	tissue homeostasis	Biological Process	10	ENSMUSP00000052465,ENSMUSP00000070868,ENSMUSP00000002274,ENSMUSP00000022099,ENSMUSP00000025523,ENSMUSP00000004949,ENSMUSP00000035167,ENSMUSP00000023583,ENSMUSP00000033427,ENSMUSP00000062277
4	GO:0050891	multicellular organismal water homeostasis	Biological Process	4	ENSMUSP00000007280,ENSMUSP00000023790,ENSMUSP00000030636,ENSMUSP00000050374
4	GO:0097009	energy homeostasis	Biological Process	1	ENSMUSP00000080974
4	GO:0007596	blood coagulation	Biological Process	9	ENSMUSP00000000049,ENSMUSP00000133302,ENSMUSP00000141648,ENSMUSP00000007799,ENSMUSP00000080974,ENSMUSP00000022576,ENSMUSP00000089051,ENSMUSP00000083204,ENSMUSP00000033821
4	GO:0050819	negative regulation of coagulation	Biological Process	4	ENSMUSP00000133302,ENSMUSP00000000049,ENSMUSP00000141648,ENSMUSP00000022576
4	GO:0050818	regulation of coagulation	Biological Process	6	ENSMUSP00000133302,ENSMUSP00000007799,ENSMUSP00000000049,ENSMUSP00000080974,ENSMUSP00000141648,ENSMUSP00000022576
4	GO:0050820	positive regulation of coagulation	Biological Process	3	ENSMUSP00000080974,ENSMUSP00000022576,ENSMUSP00000000049
4	GO:0050881	musculoskeletal movement	Biological Process	1	ENSMUSP00000028515
4	GO:0010632	regulation of epithelial cell migration	Biological Process	7	ENSMUSP00000000769,ENSMUSP00000000049,ENSMUSP00000015596,ENSMUSP00000099907,ENSMUSP00000133302,ENSMUSP00000065719,ENSMUSP00000035065
4	GO:0031650	regulation of heat generation	Biological Process	4	ENSMUSP00000035065,ENSMUSP00000025263,ENSMUSP00000028881,ENSMUSP00000039600
4	GO:0042634	regulation of hair cycle	Biological Process	2	ENSMUSP00000079699,ENSMUSP00000025263
4	GO:1900221	regulation of amyloid-beta clearance	Biological Process	2	ENSMUSP00000034713,ENSMUSP00000133302
4	GO:1903365	regulation of fear response	Biological Process	2	ENSMUSP00000133302,ENSMUSP00000064536
4	GO:0003104	positive regulation of glomerular filtration	Biological Process	1	ENSMUSP00000064536
4	GO:0010634	positive regulation of epithelial cell migration	Biological Process	3	ENSMUSP00000065719,ENSMUSP00000035065,ENSMUSP00000099907
4	GO:0010718	positive regulation of epithelial to mesenchymal transition	Biological Process	2	ENSMUSP00000028881,ENSMUSP00000015596
4	GO:0031652	positive regulation of heat generation	Biological Process	4	ENSMUSP00000035065,ENSMUSP00000025263,ENSMUSP00000028881,ENSMUSP00000039600
4	GO:0033601	positive regulation of mammary gland epithelial cell proliferation	Biological Process	2	ENSMUSP00000099907,ENSMUSP00000071715
4	GO:0042635	positive regulation of hair cycle	Biological Process	2	ENSMUSP00000079699,ENSMUSP00000025263
4	GO:0045933	positive regulation of muscle contraction	Biological Process	3	ENSMUSP00000035065,ENSMUSP00000059977,ENSMUSP00000020278
4	GO:0048636	positive regulation of muscle organ development	Biological Process	2	ENSMUSP00000064536,ENSMUSP00000022176
4	GO:0051962	positive regulation of nervous system development	Biological Process	21	ENSMUSP00000133302,ENSMUSP00000111309,ENSMUSP00000127990,ENSMUSP00000058629,ENSMUSP00000037028,ENSMUSP00000000769,ENSMUSP00000051492,ENSMUSP00000062277,ENSMUSP00000039600,ENSMUSP00000099907,ENSMUSP00000028881,ENSMUSP00000054499,ENSMUSP00000004910,ENSMUSP00000130684,ENSMUSP00000020964,ENSMUSP00000057573,ENSMUSP00000101734,ENSMUSP00000083474,ENSMUSP00000025263,ENSMUSP00000015596,ENSMUSP00000039604
4	GO:0070169	positive regulation of biomineral tissue development	Biological Process	3	ENSMUSP00000026972,ENSMUSP00000082548,ENSMUSP00000069850
4	GO:0110110	positive regulation of animal organ morphogenesis	Biological Process	1	ENSMUSP00000019997
4	GO:1900223	positive regulation of amyloid-beta clearance	Biological Process	1	ENSMUSP00000034713
4	GO:1903367	positive regulation of fear response	Biological Process	1	ENSMUSP00000064536
4	GO:1903524	positive regulation of blood circulation	Biological Process	7	ENSMUSP00000087405,ENSMUSP00000083587,ENSMUSP00000035065,ENSMUSP00000059977,ENSMUSP00000141648,ENSMUSP00000064536,ENSMUSP00000007799
4	GO:1904018	positive regulation of vasculature development	Biological Process	6	ENSMUSP00000028881,ENSMUSP00000039600,ENSMUSP00000028882,ENSMUSP00000080717,ENSMUSP00000028233,ENSMUSP00000035065
4	GO:0010633	negative regulation of epithelial cell migration	Biological Process	4	ENSMUSP00000000769,ENSMUSP00000000049,ENSMUSP00000015596,ENSMUSP00000133302
4	GO:0031645	negative regulation of neurological system process	Biological Process	2	ENSMUSP00000025263,ENSMUSP00000053394
4	GO:0032277	negative regulation of gonadotropin secretion	Biological Process	1	ENSMUSP00000020278
4	GO:0045932	negative regulation of muscle contraction	Biological Process	1	ENSMUSP00000035065
4	GO:0045992	negative regulation of embryonic development	Biological Process	1	ENSMUSP00000109884
4	GO:0048635	negative regulation of muscle organ development	Biological Process	2	ENSMUSP00000064536,ENSMUSP00000109884
4	GO:0051961	negative regulation of nervous system development	Biological Process	9	ENSMUSP00000133302,ENSMUSP00000099907,ENSMUSP00000099534,ENSMUSP00000025263,ENSMUSP00000028881,ENSMUSP00000027367,ENSMUSP00000007799,ENSMUSP00000127990,ENSMUSP00000034713
4	GO:0070164	negative regulation of adiponectin secretion	Biological Process	2	ENSMUSP00000028881,ENSMUSP00000058042
4	GO:0070168	negative regulation of biomineral tissue development	Biological Process	1	ENSMUSP00000023583
4	GO:0110111	negative regulation of animal organ morphogenesis	Biological Process	2	ENSMUSP00000025263,ENSMUSP00000022576
4	GO:1901343	negative regulation of vasculature development	Biological Process	6	ENSMUSP00000046199,ENSMUSP00000080974,ENSMUSP00000035061,ENSMUSP00000000769,ENSMUSP00000000049,ENSMUSP00000129001
4	GO:1903011	negative regulation of bone development	Biological Process	1	ENSMUSP00000023832
4	GO:1903523	negative regulation of blood circulation	Biological Process	1	ENSMUSP00000020964
4	GO:1905208	negative regulation of cardiocyte differentiation	Biological Process	1	ENSMUSP00000109884
4	GO:0034369	plasma lipoprotein particle remodeling	Biological Process	2	ENSMUSP00000133302,ENSMUSP00000024706
4	GO:0034377	plasma lipoprotein particle assembly	Biological Process	1	ENSMUSP00000133302
4	GO:0090131	mesenchyme migration	Biological Process	1	ENSMUSP00000087736
4	GO:0090132	epithelium migration	Biological Process	8	ENSMUSP00000000769,ENSMUSP00000000049,ENSMUSP00000015596,ENSMUSP00000099907,ENSMUSP00000133302,ENSMUSP00000044050,ENSMUSP00000007280,ENSMUSP00000035065
4	GO:0001946	lymphangiogenesis	Biological Process	1	ENSMUSP00000035061
4	GO:0003149	membranous septum morphogenesis	Biological Process	1	ENSMUSP00000058629
4	GO:0003151	outflow tract morphogenesis	Biological Process	2	ENSMUSP00000109794,ENSMUSP00000058629
4	GO:0003206	cardiac chamber morphogenesis	Biological Process	4	ENSMUSP00000109794,ENSMUSP00000058629,ENSMUSP00000037206,ENSMUSP00000022153
4	GO:0007164	establishment of tissue polarity	Biological Process	2	ENSMUSP00000058629,ENSMUSP00000035167
4	GO:0009887	animal organ morphogenesis	Biological Process	28	ENSMUSP00000064536,ENSMUSP00000035167,ENSMUSP00000062637,ENSMUSP00000087119,ENSMUSP00000037206,ENSMUSP00000109794,ENSMUSP00000058629,ENSMUSP00000036614,ENSMUSP00000102213,ENSMUSP00000004949,ENSMUSP00000007275,ENSMUSP00000023611,ENSMUSP00000027053,ENSMUSP00000082777,ENSMUSP00000028071,ENSMUSP00000087736,ENSMUSP00000022153,ENSMUSP00000007799,ENSMUSP00000099907,ENSMUSP00000139147,ENSMUSP00000004968,…
4	GO:0010171	body morphogenesis	Biological Process	1	ENSMUSP00000082777
4	GO:0021575	hindbrain morphogenesis	Biological Process	1	ENSMUSP00000033560
4	GO:0021587	cerebellum morphogenesis	Biological Process	1	ENSMUSP00000033560
4	GO:0021602	cranial nerve morphogenesis	Biological Process	1	ENSMUSP00000109794
4	GO:0021683	cerebellar granular layer morphogenesis	Biological Process	1	ENSMUSP00000033560
4	GO:0021696	cerebellar cortex morphogenesis	Biological Process	1	ENSMUSP00000033560
4	GO:0022603	regulation of anatomical structure morphogenesis	Biological Process	33	ENSMUSP00000019997,ENSMUSP00000054499,ENSMUSP00000083587,ENSMUSP00000025523,ENSMUSP00000106087,ENSMUSP00000085566,ENSMUSP00000001008,ENSMUSP00000039604,ENSMUSP00000046199,ENSMUSP00000080974,ENSMUSP00000035061,ENSMUSP00000000769,ENSMUSP00000000049,ENSMUSP00000052465,ENSMUSP00000099907,ENSMUSP00000109884,ENSMUSP00000028881,ENSMUSP00000039600,ENSMUSP00000028882,ENSMUSP00000080717,ENSMUSP00000028233,…
4	GO:0031069	hair follicle morphogenesis	Biological Process	1	ENSMUSP00000079699
4	GO:0035107	appendage morphogenesis	Biological Process	4	ENSMUSP00000062637,ENSMUSP00000082777,ENSMUSP00000027053,ENSMUSP00000064536
4	GO:0035239	tube morphogenesis	Biological Process	29	ENSMUSP00000054499,ENSMUSP00000109794,ENSMUSP00000035065,ENSMUSP00000087119,ENSMUSP00000139147,ENSMUSP00000085566,ENSMUSP00000007799,ENSMUSP00000064680,ENSMUSP00000083810,ENSMUSP00000017153,ENSMUSP00000004949,ENSMUSP00000064536,ENSMUSP00000035167,ENSMUSP00000062637,ENSMUSP00000046199,ENSMUSP00000080974,ENSMUSP00000035061,ENSMUSP00000000769,ENSMUSP00000000049,ENSMUSP00000028881,ENSMUSP00000039600,…
4	GO:0036303	lymph vessel morphogenesis	Biological Process	1	ENSMUSP00000035061
4	GO:0048598	embryonic morphogenesis	Biological Process	18	ENSMUSP00000031103,ENSMUSP00000065719,ENSMUSP00000017153,ENSMUSP00000004949,ENSMUSP00000064536,ENSMUSP00000035167,ENSMUSP00000062637,ENSMUSP00000030622,ENSMUSP00000036614,ENSMUSP00000019997,ENSMUSP00000027053,ENSMUSP00000054499,ENSMUSP00000087119,ENSMUSP00000102213,ENSMUSP00000109884,ENSMUSP00000082777,ENSMUSP00000028071,ENSMUSP00000058629
4	GO:0048729	tissue morphogenesis	Biological Process	18	ENSMUSP00000017153,ENSMUSP00000004949,ENSMUSP00000064536,ENSMUSP00000035167,ENSMUSP00000062637,ENSMUSP00000023788,ENSMUSP00000079699,ENSMUSP00000007280,ENSMUSP00000058629,ENSMUSP00000033560,ENSMUSP00000004968,ENSMUSP00000087119,ENSMUSP00000087736,ENSMUSP00000037206,ENSMUSP00000022153,ENSMUSP00000027053,ENSMUSP00000025263,ENSMUSP00000109794
4	GO:0060323	head morphogenesis	Biological Process	1	ENSMUSP00000082777
4	GO:0060411	cardiac septum morphogenesis	Biological Process	2	ENSMUSP00000109794,ENSMUSP00000058629
4	GO:0061383	trabecula morphogenesis	Biological Process	1	ENSMUSP00000037206
4	GO:0097094	craniofacial suture morphogenesis	Biological Process	1	ENSMUSP00000087119
4	GO:0090647	modulation of age-related behavioral decline	Biological Process	1	ENSMUSP00000015596
4	GO:0001525	angiogenesis	Biological Process	17	ENSMUSP00000046199,ENSMUSP00000080974,ENSMUSP00000035061,ENSMUSP00000000769,ENSMUSP00000000049,ENSMUSP00000028881,ENSMUSP00000039600,ENSMUSP00000028882,ENSMUSP00000080717,ENSMUSP00000028233,ENSMUSP00000035065,ENSMUSP00000054499,ENSMUSP00000109794,ENSMUSP00000087119,ENSMUSP00000139147,ENSMUSP00000085566,ENSMUSP00000007799
4	GO:0001704	formation of primary germ layer	Biological Process	3	ENSMUSP00000054499,ENSMUSP00000087119,ENSMUSP00000109884
4	GO:0001756	somitogenesis	Biological Process	1	ENSMUSP00000032194
4	GO:0001825	blastocyst formation	Biological Process	1	ENSMUSP00000064680
4	GO:0002467	germinal center formation	Biological Process	1	ENSMUSP00000019997
4	GO:0010927	cellular component assembly involved in morphogenesis	Biological Process	4	ENSMUSP00000096152,ENSMUSP00000087736,ENSMUSP00000071486,ENSMUSP00000007317
4	GO:0021684	cerebellar granular layer formation	Biological Process	1	ENSMUSP00000033560
4	GO:0021697	cerebellar cortex formation	Biological Process	1	ENSMUSP00000033560
4	GO:0035148	tube formation	Biological Process	3	ENSMUSP00000017153,ENSMUSP00000004949,ENSMUSP00000058629
4	GO:0048645	animal organ formation	Biological Process	2	ENSMUSP00000027053,ENSMUSP00000087485
4	GO:0060343	trabecula formation	Biological Process	1	ENSMUSP00000037206
4	GO:0072564	blood microparticle formation	Biological Process	2	ENSMUSP00000080974,ENSMUSP00000025263
4	GO:0097186	amelogenesis	Biological Process	1	ENSMUSP00000026972
4	GO:0097187	dentinogenesis	Biological Process	1	ENSMUSP00000026972
4	GO:0016188	synaptic vesicle maturation	Biological Process	1	ENSMUSP00000089051
4	GO:0048757	pigment granule maturation	Biological Process	1	ENSMUSP00000036614
4	GO:0071695	anatomical structure maturation	Biological Process	6	ENSMUSP00000064536,ENSMUSP00000026972,ENSMUSP00000141648,ENSMUSP00000082777,ENSMUSP00000047333,ENSMUSP00000001611
4	GO:0021604	cranial nerve structural organization	Biological Process	1	ENSMUSP00000109794
4	GO:0001568	blood vessel development	Biological Process	24	ENSMUSP00000054499,ENSMUSP00000109794,ENSMUSP00000035065,ENSMUSP00000087119,ENSMUSP00000139147,ENSMUSP00000085566,ENSMUSP00000007799,ENSMUSP00000064680,ENSMUSP00000083810,ENSMUSP00000046199,ENSMUSP00000080974,ENSMUSP00000035061,ENSMUSP00000000769,ENSMUSP00000000049,ENSMUSP00000028881,ENSMUSP00000039600,ENSMUSP00000028882,ENSMUSP00000080717,ENSMUSP00000028233,ENSMUSP00000064536,ENSMUSP00000133302,…
4	GO:0001824	blastocyst development	Biological Process	1	ENSMUSP00000064680
4	GO:0001942	hair follicle development	Biological Process	3	ENSMUSP00000079699,ENSMUSP00000001611,ENSMUSP00000025263
4	GO:0001945	lymph vessel development	Biological Process	1	ENSMUSP00000035061
4	GO:0002088	lens development in camera-type eye	Biological Process	1	ENSMUSP00000064536
4	GO:0003205	cardiac chamber development	Biological Process	5	ENSMUSP00000109794,ENSMUSP00000058629,ENSMUSP00000035167,ENSMUSP00000037206,ENSMUSP00000022153
4	GO:0003279	cardiac septum development	Biological Process	3	ENSMUSP00000109794,ENSMUSP00000058629,ENSMUSP00000035167
4	GO:0009888	tissue development	Biological Process	56	ENSMUSP00000017153,ENSMUSP00000109794,ENSMUSP00000032194,ENSMUSP00000004949,ENSMUSP00000004968,ENSMUSP00000064536,ENSMUSP00000035167,ENSMUSP00000062637,ENSMUSP00000023788,ENSMUSP00000079699,ENSMUSP00000007280,ENSMUSP00000058629,ENSMUSP00000050374,ENSMUSP00000007799,ENSMUSP00000097754,ENSMUSP00000028881,ENSMUSP00000015596,ENSMUSP00000027053,ENSMUSP00000109884,ENSMUSP00000028071,ENSMUSP00000099420,…
4	GO:0016358	dendrite development	Biological Process	5	ENSMUSP00000047275,ENSMUSP00000037028,ENSMUSP00000057573,ENSMUSP00000022429,ENSMUSP00000133302
4	GO:0021536	diencephalon development	Biological Process	1	ENSMUSP00000109794
4	GO:0021537	telencephalon development	Biological Process	4	ENSMUSP00000025523,ENSMUSP00000099907,ENSMUSP00000109794,ENSMUSP00000037000
4	GO:0021543	pallium development	Biological Process	3	ENSMUSP00000099907,ENSMUSP00000109794,ENSMUSP00000037000
4	GO:0021549	cerebellum development	Biological Process	3	ENSMUSP00000033560,ENSMUSP00000001304,ENSMUSP00000080993
4	GO:0021675	nerve development	Biological Process	2	ENSMUSP00000032844,ENSMUSP00000109794
4	GO:0021681	cerebellar granular layer development	Biological Process	1	ENSMUSP00000033560
4	GO:0021695	cerebellar cortex development	Biological Process	1	ENSMUSP00000033560
4	GO:0021772	olfactory bulb development	Biological Process	1	ENSMUSP00000025523
4	GO:0021854	hypothalamus development	Biological Process	1	ENSMUSP00000109794
4	GO:0021987	cerebral cortex development	Biological Process	3	ENSMUSP00000099907,ENSMUSP00000109794,ENSMUSP00000037000
4	GO:0021988	olfactory lobe development	Biological Process	1	ENSMUSP00000025523
4	GO:0022037	metencephalon development	Biological Process	3	ENSMUSP00000001304,ENSMUSP00000080993,ENSMUSP00000033560
4	GO:0030900	forebrain development	Biological Process	5	ENSMUSP00000025523,ENSMUSP00000099907,ENSMUSP00000109794,ENSMUSP00000033560,ENSMUSP00000037000
4	GO:0030902	hindbrain development	Biological Process	3	ENSMUSP00000001304,ENSMUSP00000080993,ENSMUSP00000033560
4	GO:0031099	regeneration	Biological Process	10	ENSMUSP00000109884,ENSMUSP00000000049,ENSMUSP00000029377,ENSMUSP00000064536,ENSMUSP00000020964,ENSMUSP00000099907,ENSMUSP00000069004,ENSMUSP00000023832,ENSMUSP00000022576,ENSMUSP00000069850
4	GO:0044691	tooth eruption	Biological Process	1	ENSMUSP00000023611
4	GO:0048513	animal organ development	Biological Process	110	ENSMUSP00000087119,ENSMUSP00000085423,ENSMUSP00000069850,ENSMUSP00000004910,ENSMUSP00000070868,ENSMUSP00000027053,ENSMUSP00000017153,ENSMUSP00000109794,ENSMUSP00000023832,ENSMUSP00000034026,ENSMUSP00000022153,ENSMUSP00000000769,ENSMUSP00000035167,ENSMUSP00000103056,ENSMUSP00000111204,ENSMUSP00000086459,ENSMUSP00000064536,ENSMUSP00000062637,ENSMUSP00000067002,ENSMUSP00000148145,ENSMUSP00000032239,…
4	GO:0048839	inner ear development	Biological Process	4	ENSMUSP00000036614,ENSMUSP00000017153,ENSMUSP00000021970,ENSMUSP00000148145
4	GO:0048840	otolith development	Biological Process	1	ENSMUSP00000036614
4	GO:0060021	roof of mouth development	Biological Process	1	ENSMUSP00000058629
4	GO:0060022	hard palate development	Biological Process	1	ENSMUSP00000058629
4	GO:0060041	retina development in camera-type eye	Biological Process	2	ENSMUSP00000022099,ENSMUSP00000000769
4	GO:0060322	head development	Biological Process	15	ENSMUSP00000001304,ENSMUSP00000030636,ENSMUSP00000022429,ENSMUSP00000089948,ENSMUSP00000101734,ENSMUSP00000028071,ENSMUSP00000062637,ENSMUSP00000080993,ENSMUSP00000033560,ENSMUSP00000025523,ENSMUSP00000099907,ENSMUSP00000109794,ENSMUSP00000037000,ENSMUSP00000082777,ENSMUSP00000087119
4	GO:0060996	dendritic spine development	Biological Process	2	ENSMUSP00000133302,ENSMUSP00000022429
4	GO:0061061	muscle structure development	Biological Process	21	ENSMUSP00000058629,ENSMUSP00000007799,ENSMUSP00000027015,ENSMUSP00000087119,ENSMUSP00000096152,ENSMUSP00000087736,ENSMUSP00000071486,ENSMUSP00000007317,ENSMUSP00000022176,ENSMUSP00000025263,ENSMUSP00000021970,ENSMUSP00000019266,ENSMUSP00000133360,ENSMUSP00000064536,ENSMUSP00000028515,ENSMUSP00000083810,ENSMUSP00000022153,ENSMUSP00000062277,ENSMUSP00000037206,ENSMUSP00000129001,ENSMUSP00000109884
4	GO:1903867	extraembryonic membrane development	Biological Process	1	ENSMUSP00000086459
4	GO:1904888	cranial skeletal system development	Biological Process	2	ENSMUSP00000087119,ENSMUSP00000027053
4	GO:0045682	regulation of epidermis development	Biological Process	3	ENSMUSP00000050374,ENSMUSP00000079699,ENSMUSP00000025263
4	GO:1901861	regulation of muscle tissue development	Biological Process	3	ENSMUSP00000064536,ENSMUSP00000022176,ENSMUSP00000109884
4	GO:2000383	regulation of ectoderm development	Biological Process	1	ENSMUSP00000109884
4	GO:0010637	negative regulation of mitochondrial fusion	Biological Process	1	ENSMUSP00000039604
4	GO:1901862	negative regulation of muscle tissue development	Biological Process	2	ENSMUSP00000064536,ENSMUSP00000109884
4	GO:1905331	negative regulation of morphogenesis of an epithelium	Biological Process	1	ENSMUSP00000025263
4	GO:2000384	negative regulation of ectoderm development	Biological Process	1	ENSMUSP00000109884
4	GO:2000393	negative regulation of lamellipodium morphogenesis	Biological Process	1	ENSMUSP00000049440
4	GO:0045684	positive regulation of epidermis development	Biological Process	3	ENSMUSP00000050374,ENSMUSP00000079699,ENSMUSP00000025263
4	GO:0090141	positive regulation of mitochondrial fission	Biological Process	1	ENSMUSP00000039604
4	GO:1901863	positive regulation of muscle tissue development	Biological Process	2	ENSMUSP00000064536,ENSMUSP00000022176
4	GO:2000334	positive regulation of blood microparticle formation	Biological Process	2	ENSMUSP00000080974,ENSMUSP00000025263
4	GO:0014834	skeletal muscle satellite cell maintenance involved in skeletal muscle regeneration	Biological Process	1	ENSMUSP00000109884
4	GO:0050920	regulation of chemotaxis	Biological Process	12	ENSMUSP00000039600,ENSMUSP00000028233,ENSMUSP00000054499,ENSMUSP00000112675,ENSMUSP00000015596,ENSMUSP00000037028,ENSMUSP00000142428,ENSMUSP00000095171,ENSMUSP00000028881,ENSMUSP00000024706,ENSMUSP00000021970,ENSMUSP00000001008
4	GO:1902186	regulation of viral release from host cell	Biological Process	2	ENSMUSP00000062277,ENSMUSP00000033264
4	GO:2000145	regulation of cell motility	Biological Process	35	ENSMUSP00000083587,ENSMUSP00000000769,ENSMUSP00000000049,ENSMUSP00000015596,ENSMUSP00000099907,ENSMUSP00000039600,ENSMUSP00000028233,ENSMUSP00000017153,ENSMUSP00000054499,ENSMUSP00000031840,ENSMUSP00000025523,ENSMUSP00000087119,ENSMUSP00000028881,ENSMUSP00000062277,ENSMUSP00000016640,ENSMUSP00000019064,ENSMUSP00000007799,ENSMUSP00000001008,ENSMUSP00000007280,ENSMUSP00000139147,ENSMUSP00000049440,…
4	GO:0050922	negative regulation of chemotaxis	Biological Process	2	ENSMUSP00000028233,ENSMUSP00000112675
4	GO:1902187	negative regulation of viral release from host cell	Biological Process	2	ENSMUSP00000062277,ENSMUSP00000033264
4	GO:2000146	negative regulation of cell motility	Biological Process	9	ENSMUSP00000000769,ENSMUSP00000000049,ENSMUSP00000015596,ENSMUSP00000028233,ENSMUSP00000007280,ENSMUSP00000139147,ENSMUSP00000049440,ENSMUSP00000133302,ENSMUSP00000023832
4	GO:0050921	positive regulation of chemotaxis	Biological Process	10	ENSMUSP00000039600,ENSMUSP00000015596,ENSMUSP00000142428,ENSMUSP00000095171,ENSMUSP00000028881,ENSMUSP00000037028,ENSMUSP00000024706,ENSMUSP00000021970,ENSMUSP00000001008,ENSMUSP00000054499
4	GO:2000147	positive regulation of cell motility	Biological Process	25	ENSMUSP00000083587,ENSMUSP00000099907,ENSMUSP00000039600,ENSMUSP00000015596,ENSMUSP00000054499,ENSMUSP00000031840,ENSMUSP00000025523,ENSMUSP00000087119,ENSMUSP00000028881,ENSMUSP00000062277,ENSMUSP00000016640,ENSMUSP00000019064,ENSMUSP00000007799,ENSMUSP00000001008,ENSMUSP00000065719,ENSMUSP00000142428,ENSMUSP00000095171,ENSMUSP00000037028,ENSMUSP00000024706,ENSMUSP00000035065,ENSMUSP00000020278,…
4	GO:0006935	chemotaxis	Biological Process	21	ENSMUSP00000039600,ENSMUSP00000019266,ENSMUSP00000001008,ENSMUSP00000109794,ENSMUSP00000025523,ENSMUSP00000028233,ENSMUSP00000019064,ENSMUSP00000028881,ENSMUSP00000031327,ENSMUSP00000074885,ENSMUSP00000036245,ENSMUSP00000006956,ENSMUSP00000054499,ENSMUSP00000112675,ENSMUSP00000015596,ENSMUSP00000021970,ENSMUSP00000037028,ENSMUSP00000142428,ENSMUSP00000095171,ENSMUSP00000024706,ENSMUSP00000120466
4	GO:0016477	cell migration	Biological Process	46	ENSMUSP00000109794,ENSMUSP00000064536,ENSMUSP00000039600,ENSMUSP00000019266,ENSMUSP00000001008,ENSMUSP00000083587,ENSMUSP00000054499,ENSMUSP00000000769,ENSMUSP00000000049,ENSMUSP00000015596,ENSMUSP00000099907,ENSMUSP00000028233,ENSMUSP00000101312,ENSMUSP00000017153,ENSMUSP00000019064,ENSMUSP00000031840,ENSMUSP00000025523,ENSMUSP00000087119,ENSMUSP00000028881,ENSMUSP00000062277,ENSMUSP00000016640,…
4	GO:0097722	sperm motility	Biological Process	2	ENSMUSP00000023832,ENSMUSP00000020278
4	GO:0052126	movement in host environment	Biological Process	2	ENSMUSP00000062277,ENSMUSP00000033264
4	GO:0050931	pigment cell differentiation	Biological Process	1	ENSMUSP00000036614
4	GO:0002760	positive regulation of antimicrobial humoral response	Biological Process	1	ENSMUSP00000022722
4	GO:0031666	positive regulation of lipopolysaccharide-mediated signaling pathway	Biological Process	2	ENSMUSP00000022124,ENSMUSP00000004949
4	GO:0048524	positive regulation of viral process	Biological Process	7	ENSMUSP00000062576,ENSMUSP00000133302,ENSMUSP00000028241,ENSMUSP00000116259,ENSMUSP00000095171,ENSMUSP00000033264,ENSMUSP00000048901
4	GO:0031334	positive regulation of protein complex assembly	Biological Process	7	ENSMUSP00000083587,ENSMUSP00000007799,ENSMUSP00000049440,ENSMUSP00000025263,ENSMUSP00000080974,ENSMUSP00000087587,ENSMUSP00000051492
4	GO:0032233	positive regulation of actin filament bundle assembly	Biological Process	1	ENSMUSP00000017153
4	GO:0051965	positive regulation of synapse assembly	Biological Process	1	ENSMUSP00000101734
4	GO:0090070	positive regulation of ribosome biogenesis	Biological Process	1	ENSMUSP00000022203
4	GO:0120034	positive regulation of plasma membrane bounded cell projection assembly	Biological Process	1	ENSMUSP00000034746
4	GO:1901890	positive regulation of cell junction assembly	Biological Process	2	ENSMUSP00000017153,ENSMUSP00000007799
4	GO:1902117	positive regulation of organelle assembly	Biological Process	3	ENSMUSP00000034746,ENSMUSP00000025263,ENSMUSP00000017153
4	GO:1903543	positive regulation of exosomal secretion	Biological Process	1	ENSMUSP00000017153
4	GO:0010811	positive regulation of cell-substrate adhesion	Biological Process	3	ENSMUSP00000080974,ENSMUSP00000017153,ENSMUSP00000054499
4	GO:0022409	positive regulation of cell-cell adhesion	Biological Process	21	ENSMUSP00000016640,ENSMUSP00000122787,ENSMUSP00000007799,ENSMUSP00000044050,ENSMUSP00000028881,ENSMUSP00000028071,ENSMUSP00000039600,ENSMUSP00000025263,ENSMUSP00000141648,ENSMUSP00000033427,ENSMUSP00000004949,ENSMUSP00000015596,ENSMUSP00000015540,ENSMUSP00000103056,ENSMUSP00000065719,ENSMUSP00000095171,ENSMUSP00000104548,ENSMUSP00000069851,ENSMUSP00000083587,ENSMUSP00000110102,ENSMUSP00000106087
4	GO:0033630	positive regulation of cell adhesion mediated by integrin	Biological Process	1	ENSMUSP00000039600
4	GO:0050942	positive regulation of pigment cell differentiation	Biological Process	1	ENSMUSP00000036614
4	GO:0002833	positive regulation of response to biotic stimulus	Biological Process	5	ENSMUSP00000022722,ENSMUSP00000016640,ENSMUSP00000022124,ENSMUSP00000004949,ENSMUSP00000031327
4	GO:0031349	positive regulation of defense response	Biological Process	23	ENSMUSP00000006625,ENSMUSP00000080974,ENSMUSP00000071130,ENSMUSP00000025263,ENSMUSP00000035065,ENSMUSP00000028881,ENSMUSP00000039600,ENSMUSP00000104548,ENSMUSP00000019997,ENSMUSP00000007799,ENSMUSP00000056669,ENSMUSP00000142428,ENSMUSP00000020970,ENSMUSP00000028259,ENSMUSP00000095171,ENSMUSP00000087587,ENSMUSP00000070868,ENSMUSP00000034713,ENSMUSP00000126067,ENSMUSP00000001008,ENSMUSP00000015596,…
4	GO:0032103	positive regulation of response to external stimulus	Biological Process	24	ENSMUSP00000071130,ENSMUSP00000022722,ENSMUSP00000025263,ENSMUSP00000039600,ENSMUSP00000035065,ENSMUSP00000028881,ENSMUSP00000022124,ENSMUSP00000004949,ENSMUSP00000020964,ENSMUSP00000070868,ENSMUSP00000034713,ENSMUSP00000126067,ENSMUSP00000001008,ENSMUSP00000015596,ENSMUSP00000054499,ENSMUSP00000022576,ENSMUSP00000000049,ENSMUSP00000031327,ENSMUSP00000142428,ENSMUSP00000095171,ENSMUSP00000037028,…
4	GO:0060760	positive regulation of response to cytokine stimulus	Biological Process	6	ENSMUSP00000095171,ENSMUSP00000037657,ENSMUSP00000024791,ENSMUSP00000027015,ENSMUSP00000062277,ENSMUSP00000028259
4	GO:0070572	positive regulation of neuron projection regeneration	Biological Process	1	ENSMUSP00000020964
4	GO:1902884	positive regulation of response to oxidative stress	Biological Process	2	ENSMUSP00000025263,ENSMUSP00000023832
4	GO:1903036	positive regulation of response to wounding	Biological Process	5	ENSMUSP00000080974,ENSMUSP00000065719,ENSMUSP00000020964,ENSMUSP00000022576,ENSMUSP00000000049
4	GO:2001025	positive regulation of response to drug	Biological Process	3	ENSMUSP00000032888,ENSMUSP00000020278,ENSMUSP00000099907
4	GO:0031340	positive regulation of vesicle fusion	Biological Process	1	ENSMUSP00000070868
4	GO:0032370	positive regulation of lipid transport	Biological Process	3	ENSMUSP00000133302,ENSMUSP00000028881,ENSMUSP00000028882
4	GO:0032388	positive regulation of intracellular transport	Biological Process	7	ENSMUSP00000035065,ENSMUSP00000089051,ENSMUSP00000050374,ENSMUSP00000020653,ENSMUSP00000028241,ENSMUSP00000151388,ENSMUSP00000113761
4	GO:0032411	positive regulation of transporter activity	Biological Process	2	ENSMUSP00000015596,ENSMUSP00000023832
4	GO:0032892	positive regulation of organic acid transport	Biological Process	4	ENSMUSP00000032888,ENSMUSP00000028881,ENSMUSP00000028882,ENSMUSP00000089051
4	GO:0034764	positive regulation of transmembrane transport	Biological Process	4	ENSMUSP00000032888,ENSMUSP00000126067,ENSMUSP00000015596,ENSMUSP00000023832
4	GO:0043270	positive regulation of ion transport	Biological Process	15	ENSMUSP00000032888,ENSMUSP00000007799,ENSMUSP00000031327,ENSMUSP00000020278,ENSMUSP00000028881,ENSMUSP00000028882,ENSMUSP00000099907,ENSMUSP00000126067,ENSMUSP00000039600,ENSMUSP00000001008,ENSMUSP00000015596,ENSMUSP00000023832,ENSMUSP00000133302,ENSMUSP00000089051,ENSMUSP00000069850
4	GO:0045807	positive regulation of endocytosis	Biological Process	12	ENSMUSP00000099534,ENSMUSP00000080974,ENSMUSP00000025263,ENSMUSP00000028881,ENSMUSP00000037028,ENSMUSP00000023583,ENSMUSP00000015596,ENSMUSP00000133302,ENSMUSP00000056669,ENSMUSP00000034713,ENSMUSP00000126067,ENSMUSP00000007799
4	GO:0051047	positive regulation of secretion	Biological Process	24	ENSMUSP00000126067,ENSMUSP00000022576,ENSMUSP00000020278,ENSMUSP00000020312,ENSMUSP00000064536,ENSMUSP00000028881,ENSMUSP00000028882,ENSMUSP00000099907,ENSMUSP00000028259,ENSMUSP00000089051,ENSMUSP00000141648,ENSMUSP00000035898,ENSMUSP00000056669,ENSMUSP00000080974,ENSMUSP00000027015,ENSMUSP00000025263,ENSMUSP00000121848,ENSMUSP00000032239,ENSMUSP00000090121,ENSMUSP00000001008,ENSMUSP00000025523,…
4	GO:0051222	positive regulation of protein transport	Biological Process	24	ENSMUSP00000020312,ENSMUSP00000064536,ENSMUSP00000028259,ENSMUSP00000035065,ENSMUSP00000050374,ENSMUSP00000141648,ENSMUSP00000028882,ENSMUSP00000056669,ENSMUSP00000080974,ENSMUSP00000027015,ENSMUSP00000025263,ENSMUSP00000121848,ENSMUSP00000032239,ENSMUSP00000035898,ENSMUSP00000090121,ENSMUSP00000001008,ENSMUSP00000020653,ENSMUSP00000025523,ENSMUSP00000028233,ENSMUSP00000028241,ENSMUSP00000151388,…
4	GO:0051590	positive regulation of neurotransmitter transport	Biological Process	4	ENSMUSP00000126067,ENSMUSP00000032888,ENSMUSP00000020278,ENSMUSP00000089051
4	GO:0051954	positive regulation of amine transport	Biological Process	4	ENSMUSP00000032888,ENSMUSP00000020278,ENSMUSP00000099907,ENSMUSP00000089051
4	GO:0032793	positive regulation of CREB transcription factor activity	Biological Process	1	ENSMUSP00000037028
4	GO:0051092	positive regulation of NF-kappaB transcription factor activity	Biological Process	12	ENSMUSP00000083587,ENSMUSP00000080974,ENSMUSP00000025263,ENSMUSP00000028881,ENSMUSP00000074471,ENSMUSP00000062277,ENSMUSP00000022830,ENSMUSP00000047333,ENSMUSP00000042987,ENSMUSP00000130759,ENSMUSP00000004949,ENSMUSP00000015596
4	GO:0030194	positive regulation of blood coagulation	Biological Process	3	ENSMUSP00000022576,ENSMUSP00000000049,ENSMUSP00000080974
4	GO:0090316	positive regulation of intracellular protein transport	Biological Process	6	ENSMUSP00000035065,ENSMUSP00000050374,ENSMUSP00000020653,ENSMUSP00000028241,ENSMUSP00000113761,ENSMUSP00000151388
4	GO:1900182	positive regulation of protein localization to nucleus	Biological Process	1	ENSMUSP00000035065
4	GO:1903749	positive regulation of establishment of protein localization to mitochondrion	Biological Process	1	ENSMUSP00000113761
4	GO:1904377	positive regulation of protein localization to cell periphery	Biological Process	3	ENSMUSP00000015981,ENSMUSP00000025263,ENSMUSP00000024791
4	GO:1905477	positive regulation of protein localization to membrane	Biological Process	5	ENSMUSP00000028241,ENSMUSP00000015981,ENSMUSP00000025263,ENSMUSP00000024791,ENSMUSP00000113761
4	GO:1905552	positive regulation of protein localization to endoplasmic reticulum	Biological Process	1	ENSMUSP00000099907
4	GO:2000010	positive regulation of protein localization to cell surface	Biological Process	1	ENSMUSP00000025263
4	GO:0010884	positive regulation of lipid storage	Biological Process	1	ENSMUSP00000080974
4	GO:0032088	negative regulation of NF-kappaB transcription factor activity	Biological Process	2	ENSMUSP00000019997,ENSMUSP00000033264
4	GO:0031665	negative regulation of lipopolysaccharide-mediated signaling pathway	Biological Process	2	ENSMUSP00000022722,ENSMUSP00000019997
4	GO:0048525	negative regulation of viral process	Biological Process	9	ENSMUSP00000062277,ENSMUSP00000033264,ENSMUSP00000039600,ENSMUSP00000001008,ENSMUSP00000020970,ENSMUSP00000025263,ENSMUSP00000082548,ENSMUSP00000116259,ENSMUSP00000031542
4	GO:0050687	negative regulation of defense response to virus	Biological Process	1	ENSMUSP00000039604
4	GO:0002832	negative regulation of response to biotic stimulus	Biological Process	3	ENSMUSP00000039604,ENSMUSP00000022722,ENSMUSP00000019997
4	GO:0031348	negative regulation of defense response	Biological Process	11	ENSMUSP00000122787,ENSMUSP00000019997,ENSMUSP00000032260,ENSMUSP00000039604,ENSMUSP00000133302,ENSMUSP00000023790,ENSMUSP00000112675,ENSMUSP00000000769,ENSMUSP00000037657,ENSMUSP00000034713,ENSMUSP00000015596
4	GO:0032102	negative regulation of response to external stimulus	Biological Process	16	ENSMUSP00000122787,ENSMUSP00000019997,ENSMUSP00000133302,ENSMUSP00000028233,ENSMUSP00000000049,ENSMUSP00000141648,ENSMUSP00000022576,ENSMUSP00000039604,ENSMUSP00000023790,ENSMUSP00000112675,ENSMUSP00000000769,ENSMUSP00000022176,ENSMUSP00000064536,ENSMUSP00000034713,ENSMUSP00000022722,ENSMUSP00000015596
4	GO:0060761	negative regulation of response to cytokine stimulus	Biological Process	5	ENSMUSP00000007799,ENSMUSP00000112675,ENSMUSP00000037657,ENSMUSP00000039604,ENSMUSP00000039600
4	GO:0061179	negative regulation of insulin secretion involved in cellular response to glucose stimulus	Biological Process	2	ENSMUSP00000022176,ENSMUSP00000020964
4	GO:0070571	negative regulation of neuron projection regeneration	Biological Process	1	ENSMUSP00000099907
4	GO:1902883	negative regulation of response to oxidative stress	Biological Process	1	ENSMUSP00000058629
4	GO:1903035	negative regulation of response to wounding	Biological Process	7	ENSMUSP00000133302,ENSMUSP00000000049,ENSMUSP00000141648,ENSMUSP00000022576,ENSMUSP00000022176,ENSMUSP00000064536,ENSMUSP00000015596
4	GO:2001024	negative regulation of response to drug	Biological Process	3	ENSMUSP00000025263,ENSMUSP00000041503,ENSMUSP00000126067
4	GO:0032387	negative regulation of intracellular transport	Biological Process	2	ENSMUSP00000080974,ENSMUSP00000043245
4	GO:0032410	negative regulation of transporter activity	Biological Process	4	ENSMUSP00000020964,ENSMUSP00000007799,ENSMUSP00000022419,ENSMUSP00000126067
4	GO:0032891	negative regulation of organic acid transport	Biological Process	3	ENSMUSP00000025263,ENSMUSP00000041503,ENSMUSP00000028881
4	GO:0034763	negative regulation of transmembrane transport	Biological Process	7	ENSMUSP00000025263,ENSMUSP00000041503,ENSMUSP00000028881,ENSMUSP00000127716,ENSMUSP00000020964,ENSMUSP00000007799,ENSMUSP00000022419
4	GO:0043271	negative regulation of ion transport	Biological Process	10	ENSMUSP00000025263,ENSMUSP00000041503,ENSMUSP00000105736,ENSMUSP00000028881,ENSMUSP00000020964,ENSMUSP00000126067,ENSMUSP00000083587,ENSMUSP00000035065,ENSMUSP00000007799,ENSMUSP00000022419
4	GO:0045806	negative regulation of endocytosis	Biological Process	3	ENSMUSP00000056715,ENSMUSP00000007799,ENSMUSP00000035898
4	GO:0051048	negative regulation of secretion	Biological Process	12	ENSMUSP00000025263,ENSMUSP00000095171,ENSMUSP00000059977,ENSMUSP00000028881,ENSMUSP00000020278,ENSMUSP00000126067,ENSMUSP00000020970,ENSMUSP00000019997,ENSMUSP00000022176,ENSMUSP00000020964,ENSMUSP00000058042,ENSMUSP00000054499
4	GO:0051224	negative regulation of protein transport	Biological Process	10	ENSMUSP00000025263,ENSMUSP00000080974,ENSMUSP00000020970,ENSMUSP00000019997,ENSMUSP00000022176,ENSMUSP00000020964,ENSMUSP00000028881,ENSMUSP00000058042,ENSMUSP00000043245,ENSMUSP00000054499
4	GO:0051589	negative regulation of neurotransmitter transport	Biological Process	3	ENSMUSP00000025263,ENSMUSP00000041503,ENSMUSP00000126067
4	GO:0051622	negative regulation of norepinephrine uptake	Biological Process	1	ENSMUSP00000126067
4	GO:0051953	negative regulation of amine transport	Biological Process	5	ENSMUSP00000025263,ENSMUSP00000041503,ENSMUSP00000059977,ENSMUSP00000028881,ENSMUSP00000126067
4	GO:0030195	negative regulation of blood coagulation	Biological Process	4	ENSMUSP00000133302,ENSMUSP00000141648,ENSMUSP00000022576,ENSMUSP00000000049
4	GO:0090317	negative regulation of intracellular protein transport	Biological Process	2	ENSMUSP00000080974,ENSMUSP00000043245
4	GO:1900181	negative regulation of protein localization to nucleus	Biological Process	2	ENSMUSP00000080974,ENSMUSP00000088291
4	GO:1904376	negative regulation of protein localization to cell periphery	Biological Process	1	ENSMUSP00000127716
4	GO:1905476	negative regulation of protein localization to membrane	Biological Process	1	ENSMUSP00000127716
4	GO:0010888	negative regulation of lipid storage	Biological Process	1	ENSMUSP00000112675
4	GO:0010810	regulation of cell-substrate adhesion	Biological Process	7	ENSMUSP00000139147,ENSMUSP00000080974,ENSMUSP00000109884,ENSMUSP00000017153,ENSMUSP00000087119,ENSMUSP00000033721,ENSMUSP00000054499
4	GO:0022407	regulation of cell-cell adhesion	Biological Process	26	ENSMUSP00000106087,ENSMUSP00000016640,ENSMUSP00000122787,ENSMUSP00000007799,ENSMUSP00000044050,ENSMUSP00000028881,ENSMUSP00000028071,ENSMUSP00000039600,ENSMUSP00000019997,ENSMUSP00000025263,ENSMUSP00000141648,ENSMUSP00000033427,ENSMUSP00000004949,ENSMUSP00000015596,ENSMUSP00000031840,ENSMUSP00000017153,ENSMUSP00000069850,ENSMUSP00000015540,ENSMUSP00000103056,ENSMUSP00000065719,ENSMUSP00000095171,…
4	GO:0033628	regulation of cell adhesion mediated by integrin	Biological Process	2	ENSMUSP00000044050,ENSMUSP00000039600
4	GO:0032880	regulation of protein localization	Biological Process	43	ENSMUSP00000025263,ENSMUSP00000018610,ENSMUSP00000028881,ENSMUSP00000039600,ENSMUSP00000020312,ENSMUSP00000064536,ENSMUSP00000028259,ENSMUSP00000035065,ENSMUSP00000080974,ENSMUSP00000084257,ENSMUSP00000041380,ENSMUSP00000050374,ENSMUSP00000020970,ENSMUSP00000019997,ENSMUSP00000141648,ENSMUSP00000028882,ENSMUSP00000056669,ENSMUSP00000027015,ENSMUSP00000121848,ENSMUSP00000032239,ENSMUSP00000035898,…
4	GO:0051049	regulation of transport	Biological Process	71	ENSMUSP00000126067,ENSMUSP00000025263,ENSMUSP00000041503,ENSMUSP00000032888,ENSMUSP00000056715,ENSMUSP00000095171,ENSMUSP00000022576,ENSMUSP00000020653,ENSMUSP00000105736,ENSMUSP00000018610,ENSMUSP00000028881,ENSMUSP00000039600,ENSMUSP00000007799,ENSMUSP00000059977,ENSMUSP00000031327,ENSMUSP00000089051,ENSMUSP00000022419,ENSMUSP00000133302,ENSMUSP00000020964,ENSMUSP00000020278,ENSMUSP00000064536,…
4	GO:0060341	regulation of cellular localization	Biological Process	28	ENSMUSP00000126067,ENSMUSP00000020653,ENSMUSP00000007799,ENSMUSP00000089051,ENSMUSP00000020964,ENSMUSP00000020278,ENSMUSP00000035065,ENSMUSP00000080974,ENSMUSP00000083474,ENSMUSP00000084257,ENSMUSP00000041380,ENSMUSP00000050374,ENSMUSP00000038502,ENSMUSP00000037206,ENSMUSP00000022176,ENSMUSP00000028241,ENSMUSP00000151388,ENSMUSP00000033560,ENSMUSP00000088291,ENSMUSP00000035898,ENSMUSP00000087119,…
4	GO:1905952	regulation of lipid localization	Biological Process	7	ENSMUSP00000133302,ENSMUSP00000002737,ENSMUSP00000080974,ENSMUSP00000112675,ENSMUSP00000028881,ENSMUSP00000028882,ENSMUSP00000018645
4	GO:0009649	entrainment of circadian clock	Biological Process	2	ENSMUSP00000083474,ENSMUSP00000032194
4	GO:0002759	regulation of antimicrobial humoral response	Biological Process	1	ENSMUSP00000022722
4	GO:0031664	regulation of lipopolysaccharide-mediated signaling pathway	Biological Process	4	ENSMUSP00000022124,ENSMUSP00000004949,ENSMUSP00000022722,ENSMUSP00000019997
4	GO:0043903	regulation of symbiosis, encompassing mutualism through parasitism	Biological Process	19	ENSMUSP00000062277,ENSMUSP00000033264,ENSMUSP00000080974,ENSMUSP00000015981,ENSMUSP00000025263,ENSMUSP00000039600,ENSMUSP00000001008,ENSMUSP00000062576,ENSMUSP00000023788,ENSMUSP00000133302,ENSMUSP00000028241,ENSMUSP00000116259,ENSMUSP00000020970,ENSMUSP00000082548,ENSMUSP00000031542,ENSMUSP00000095171,ENSMUSP00000048901,ENSMUSP00000031327,ENSMUSP00000007799
4	GO:0050688	regulation of defense response to virus	Biological Process	5	ENSMUSP00000039600,ENSMUSP00000054637,ENSMUSP00000039604,ENSMUSP00000028881,ENSMUSP00000122787
4	GO:1900150	regulation of defense response to fungus	Biological Process	1	ENSMUSP00000031327
4	GO:0032231	regulation of actin filament bundle assembly	Biological Process	3	ENSMUSP00000017153,ENSMUSP00000030636,ENSMUSP00000033721
4	GO:0043254	regulation of protein complex assembly	Biological Process	14	ENSMUSP00000020653,ENSMUSP00000089051,ENSMUSP00000047275,ENSMUSP00000083587,ENSMUSP00000030636,ENSMUSP00000126067,ENSMUSP00000007799,ENSMUSP00000025263,ENSMUSP00000133302,ENSMUSP00000049440,ENSMUSP00000096152,ENSMUSP00000080974,ENSMUSP00000087587,ENSMUSP00000051492
4	GO:0051963	regulation of synapse assembly	Biological Process	2	ENSMUSP00000101734,ENSMUSP00000126067
4	GO:0060491	regulation of cell projection assembly	Biological Process	6	ENSMUSP00000045527,ENSMUSP00000034746,ENSMUSP00000106087,ENSMUSP00000047275,ENSMUSP00000083587,ENSMUSP00000007799
4	GO:0090069	regulation of ribosome biogenesis	Biological Process	2	ENSMUSP00000035179,ENSMUSP00000022203
4	GO:1901888	regulation of cell junction assembly	Biological Process	6	ENSMUSP00000017153,ENSMUSP00000087119,ENSMUSP00000033721,ENSMUSP00000025263,ENSMUSP00000007799,ENSMUSP00000064536
4	GO:1902115	regulation of organelle assembly	Biological Process	5	ENSMUSP00000045527,ENSMUSP00000034746,ENSMUSP00000006625,ENSMUSP00000025263,ENSMUSP00000017153
4	GO:1903541	regulation of exosomal secretion	Biological Process	1	ENSMUSP00000017153
4	GO:0050932	regulation of pigment cell differentiation	Biological Process	1	ENSMUSP00000036614
4	GO:0002831	regulation of response to biotic stimulus	Biological Process	11	ENSMUSP00000039600,ENSMUSP00000054637,ENSMUSP00000022722,ENSMUSP00000016640,ENSMUSP00000022124,ENSMUSP00000004949,ENSMUSP00000122787,ENSMUSP00000039604,ENSMUSP00000028881,ENSMUSP00000031327,ENSMUSP00000019997
4	GO:0032101	regulation of response to external stimulus	Biological Process	43	ENSMUSP00000122787,ENSMUSP00000039600,ENSMUSP00000054637,ENSMUSP00000019997,ENSMUSP00000071130,ENSMUSP00000022722,ENSMUSP00000025263,ENSMUSP00000133302,ENSMUSP00000028233,ENSMUSP00000007799,ENSMUSP00000000049,ENSMUSP00000080974,ENSMUSP00000035065,ENSMUSP00000028881,ENSMUSP00000022124,ENSMUSP00000004949,ENSMUSP00000141648,ENSMUSP00000022576,ENSMUSP00000020964,ENSMUSP00000039604,ENSMUSP00000027015,…
4	GO:0060759	regulation of response to cytokine stimulus	Biological Process	10	ENSMUSP00000007799,ENSMUSP00000095171,ENSMUSP00000112675,ENSMUSP00000037657,ENSMUSP00000039604,ENSMUSP00000028259,ENSMUSP00000039600,ENSMUSP00000024791,ENSMUSP00000027015,ENSMUSP00000062277
4	GO:0061178	regulation of insulin secretion involved in cellular response to glucose stimulus	Biological Process	2	ENSMUSP00000022176,ENSMUSP00000020964
4	GO:0080134	regulation of response to stress	Biological Process	60	ENSMUSP00000122787,ENSMUSP00000006625,ENSMUSP00000080974,ENSMUSP00000039600,ENSMUSP00000054637,ENSMUSP00000019997,ENSMUSP00000071130,ENSMUSP00000025263,ENSMUSP00000039604,ENSMUSP00000133302,ENSMUSP00000150618,ENSMUSP00000007799,ENSMUSP00000000049,ENSMUSP00000035065,ENSMUSP00000028881,ENSMUSP00000033570,ENSMUSP00000022176,ENSMUSP00000041503,ENSMUSP00000028882,ENSMUSP00000104548,ENSMUSP00000056669,…
4	GO:2001023	regulation of response to drug	Biological Process	6	ENSMUSP00000025263,ENSMUSP00000041503,ENSMUSP00000032888,ENSMUSP00000020278,ENSMUSP00000126067,ENSMUSP00000099907
4	GO:0098901	regulation of cardiac muscle cell action potential	Biological Process	1	ENSMUSP00000007799
4	GO:0098903	regulation of membrane repolarization during action potential	Biological Process	1	ENSMUSP00000007799
4	GO:0030193	regulation of blood coagulation	Biological Process	6	ENSMUSP00000133302,ENSMUSP00000080974,ENSMUSP00000000049,ENSMUSP00000141648,ENSMUSP00000022576,ENSMUSP00000007799
4	GO:0001666	response to hypoxia	Biological Process	9	ENSMUSP00000035065,ENSMUSP00000000175,ENSMUSP00000027015,ENSMUSP00000087119,ENSMUSP00000018610,ENSMUSP00000028881,ENSMUSP00000007799,ENSMUSP00000044050,ENSMUSP00000015596
4	GO:0002931	response to ischemia	Biological Process	3	ENSMUSP00000022419,ENSMUSP00000020543,ENSMUSP00000007799
4	GO:0006952	defense response	Biological Process	92	ENSMUSP00000028881,ENSMUSP00000028882,ENSMUSP00000044050,ENSMUSP00000027015,ENSMUSP00000126067,ENSMUSP00000122787,ENSMUSP00000023790,ENSMUSP00000006625,ENSMUSP00000080974,ENSMUSP00000039600,ENSMUSP00000054637,ENSMUSP00000083587,ENSMUSP00000025263,ENSMUSP00000031327,ENSMUSP00000099916,ENSMUSP00000071130,ENSMUSP00000064536,ENSMUSP00000019997,ENSMUSP00000054499,ENSMUSP00000006956,ENSMUSP00000023583,…
4	GO:0006970	response to osmotic stress	Biological Process	1	ENSMUSP00000035065
4	GO:0006979	response to oxidative stress	Biological Process	21	ENSMUSP00000041503,ENSMUSP00000028881,ENSMUSP00000126067,ENSMUSP00000041380,ENSMUSP00000051492,ENSMUSP00000020964,ENSMUSP00000141022,ENSMUSP00000080974,ENSMUSP00000019997,ENSMUSP00000022419,ENSMUSP00000025263,ENSMUSP00000023832,ENSMUSP00000058629,ENSMUSP00000087405,ENSMUSP00000133302,ENSMUSP00000035065,ENSMUSP00000087119,ENSMUSP00000059977,ENSMUSP00000104485,ENSMUSP00000080998,ENSMUSP00000080993
4	GO:0006991	response to sterol depletion	Biological Process	1	ENSMUSP00000103056
4	GO:0009408	response to heat	Biological Process	8	ENSMUSP00000035065,ENSMUSP00000027961,ENSMUSP00000028882,ENSMUSP00000056669,ENSMUSP00000028881,ENSMUSP00000022576,ENSMUSP00000074885,ENSMUSP00000004910
4	GO:0009611	response to wounding	Biological Process	23	ENSMUSP00000028882,ENSMUSP00000083204,ENSMUSP00000141648,ENSMUSP00000022576,ENSMUSP00000000049,ENSMUSP00000033821,ENSMUSP00000133302,ENSMUSP00000109884,ENSMUSP00000007799,ENSMUSP00000080974,ENSMUSP00000054499,ENSMUSP00000023788,ENSMUSP00000028881,ENSMUSP00000017153,ENSMUSP00000074885,ENSMUSP00000029377,ENSMUSP00000064536,ENSMUSP00000022429,ENSMUSP00000020964,ENSMUSP00000022176,ENSMUSP00000089051,…
4	GO:0034405	response to fluid shear stress	Biological Process	1	ENSMUSP00000035065
4	GO:0035902	response to immobilization stress	Biological Process	1	ENSMUSP00000028881
4	GO:0035966	response to topologically incorrect protein	Biological Process	2	ENSMUSP00000027961,ENSMUSP00000112675
4	GO:0042594	response to starvation	Biological Process	3	ENSMUSP00000065423,ENSMUSP00000111204,ENSMUSP00000020543
4	GO:0055093	response to hyperoxia	Biological Process	1	ENSMUSP00000007799
4	GO:0061771	response to caloric restriction	Biological Process	2	ENSMUSP00000133302,ENSMUSP00000034713
4	GO:0097501	stress response to metal ion	Biological Process	1	ENSMUSP00000034214
4	GO:0009612	response to mechanical stimulus	Biological Process	10	ENSMUSP00000035065,ENSMUSP00000028881,ENSMUSP00000007799,ENSMUSP00000104548,ENSMUSP00000025263,ENSMUSP00000080974,ENSMUSP00000087119,ENSMUSP00000064680,ENSMUSP00000111204,ENSMUSP00000080717
4	GO:0009581	detection of external stimulus	Biological Process	1	ENSMUSP00000025263
4	GO:0009991	response to extracellular stimulus	Biological Process	15	ENSMUSP00000133302,ENSMUSP00000127646,ENSMUSP00000022176,ENSMUSP00000065423,ENSMUSP00000111204,ENSMUSP00000089948,ENSMUSP00000090059,ENSMUSP00000020964,ENSMUSP00000027015,ENSMUSP00000028881,ENSMUSP00000035065,ENSMUSP00000020543,ENSMUSP00000034713,ENSMUSP00000091692,ENSMUSP00000094225
4	GO:0043207	response to external biotic stimulus	Biological Process	56	ENSMUSP00000122787,ENSMUSP00000039600,ENSMUSP00000054637,ENSMUSP00000056669,ENSMUSP00000019997,ENSMUSP00000099534,ENSMUSP00000031327,ENSMUSP00000074885,ENSMUSP00000022722,ENSMUSP00000046199,ENSMUSP00000025263,ENSMUSP00000018610,ENSMUSP00000082548,ENSMUSP00000032239,ENSMUSP00000069850,ENSMUSP00000023611,ENSMUSP00000099888,ENSMUSP00000028259,ENSMUSP00000099890,ENSMUSP00000020970,ENSMUSP00000030636,…
4	GO:0060004	reflex	Biological Process	1	ENSMUSP00000064536
4	GO:0071496	cellular response to external stimulus	Biological Process	9	ENSMUSP00000065423,ENSMUSP00000035065,ENSMUSP00000028881,ENSMUSP00000007799,ENSMUSP00000104548,ENSMUSP00000111204,ENSMUSP00000020543,ENSMUSP00000091692,ENSMUSP00000094225
4	GO:0002347	response to tumor cell	Biological Process	2	ENSMUSP00000139147,ENSMUSP00000016640
4	GO:0009595	detection of biotic stimulus	Biological Process	1	ENSMUSP00000024791
4	GO:0009266	response to temperature stimulus	Biological Process	8	ENSMUSP00000056669,ENSMUSP00000028881,ENSMUSP00000022576,ENSMUSP00000074885,ENSMUSP00000004910,ENSMUSP00000035065,ENSMUSP00000027961,ENSMUSP00000028882
4	GO:0009268	response to pH	Biological Process	4	ENSMUSP00000000769,ENSMUSP00000064536,ENSMUSP00000029711,ENSMUSP00000127646
4	GO:0009314	response to radiation	Biological Process	17	ENSMUSP00000022176,ENSMUSP00000062277,ENSMUSP00000111204,ENSMUSP00000032194,ENSMUSP00000080998,ENSMUSP00000007272,ENSMUSP00000030842,ENSMUSP00000092673,ENSMUSP00000086459,ENSMUSP00000028881,ENSMUSP00000074885,ENSMUSP00000035065,ENSMUSP00000137253,ENSMUSP00000083474,ENSMUSP00000062576,ENSMUSP00000007275,ENSMUSP00000064680
4	GO:0009582	detection of abiotic stimulus	Biological Process	1	ENSMUSP00000025263
4	GO:0051602	response to electrical stimulus	Biological Process	3	ENSMUSP00000056669,ENSMUSP00000080993,ENSMUSP00000020278
4	GO:0070482	response to oxygen levels	Biological Process	12	ENSMUSP00000027015,ENSMUSP00000087119,ENSMUSP00000018610,ENSMUSP00000028881,ENSMUSP00000007799,ENSMUSP00000044050,ENSMUSP00000015596,ENSMUSP00000020543,ENSMUSP00000042918,ENSMUSP00000048770,ENSMUSP00000035065,ENSMUSP00000000175
4	GO:0071214	cellular response to abiotic stimulus	Biological Process	8	ENSMUSP00000035065,ENSMUSP00000028881,ENSMUSP00000007799,ENSMUSP00000104548,ENSMUSP00000137253,ENSMUSP00000064536,ENSMUSP00000029711,ENSMUSP00000062576
4	GO:0009725	response to hormone	Biological Process	31	ENSMUSP00000086094,ENSMUSP00000112675,ENSMUSP00000029711,ENSMUSP00000111204,ENSMUSP00000035065,ENSMUSP00000089051,ENSMUSP00000028881,ENSMUSP00000089948,ENSMUSP00000034026,ENSMUSP00000074885,ENSMUSP00000007799,ENSMUSP00000061474,ENSMUSP00000103056,ENSMUSP00000004968,ENSMUSP00000064680,ENSMUSP00000055714,ENSMUSP00000094225,ENSMUSP00000095199,ENSMUSP00000004910,ENSMUSP00000127716,ENSMUSP00000062576,…
4	GO:0055094	response to lipoprotein particle	Biological Process	3	ENSMUSP00000080974,ENSMUSP00000034713,ENSMUSP00000133302
4	GO:0070849	response to epidermal growth factor	Biological Process	1	ENSMUSP00000000505
4	GO:0071495	cellular response to endogenous stimulus	Biological Process	40	ENSMUSP00000034026,ENSMUSP00000145451,ENSMUSP00000023809,ENSMUSP00000086094,ENSMUSP00000112675,ENSMUSP00000029711,ENSMUSP00000051492,ENSMUSP00000025263,ENSMUSP00000020543,ENSMUSP00000069850,ENSMUSP00000047333,ENSMUSP00000007799,ENSMUSP00000058629,ENSMUSP00000004968,ENSMUSP00000064680,ENSMUSP00000111204,ENSMUSP00000055714,ENSMUSP00000094225,ENSMUSP00000026972,ENSMUSP00000095199,ENSMUSP00000127716,…
4	GO:0071559	response to transforming growth factor beta	Biological Process	7	ENSMUSP00000034026,ENSMUSP00000145451,ENSMUSP00000023809,ENSMUSP00000047333,ENSMUSP00000007799,ENSMUSP00000113761,ENSMUSP00000027401
4	GO:0071772	response to BMP	Biological Process	2	ENSMUSP00000058629,ENSMUSP00000007799
4	GO:0071774	response to fibroblast growth factor	Biological Process	3	ENSMUSP00000051492,ENSMUSP00000026972,ENSMUSP00000039600
4	GO:1990089	response to nerve growth factor	Biological Process	1	ENSMUSP00000042053
4	GO:0001101	response to acid chemical	Biological Process	15	ENSMUSP00000028881,ENSMUSP00000025263,ENSMUSP00000020543,ENSMUSP00000069850,ENSMUSP00000111204,ENSMUSP00000099916,ENSMUSP00000080974,ENSMUSP00000035065,ENSMUSP00000091692,ENSMUSP00000007275,ENSMUSP00000000769,ENSMUSP00000051492,ENSMUSP00000127716,ENSMUSP00000034713,ENSMUSP00000111309
4	GO:0007584	response to nutrient	Biological Process	8	ENSMUSP00000090059,ENSMUSP00000020964,ENSMUSP00000027015,ENSMUSP00000028881,ENSMUSP00000035065,ENSMUSP00000091692,ENSMUSP00000127646,ENSMUSP00000022176
4	GO:0042493	response to drug	Biological Process	43	ENSMUSP00000074885,ENSMUSP00000025263,ENSMUSP00000041503,ENSMUSP00000032888,ENSMUSP00000037023,ENSMUSP00000126067,ENSMUSP00000028881,ENSMUSP00000020278,ENSMUSP00000090897,ENSMUSP00000064536,ENSMUSP00000091692,ENSMUSP00000037206,ENSMUSP00000111204,ENSMUSP00000019997,ENSMUSP00000007799,ENSMUSP00000027015,ENSMUSP00000099907,ENSMUSP00000028515,ENSMUSP00000111309,ENSMUSP00000018610,ENSMUSP00000020964,…
4	GO:0009636	response to toxic substance	Biological Process	27	ENSMUSP00000074885,ENSMUSP00000034214,ENSMUSP00000028515,ENSMUSP00000020964,ENSMUSP00000141022,ENSMUSP00000087736,ENSMUSP00000056669,ENSMUSP00000127646,ENSMUSP00000028881,ENSMUSP00000022176,ENSMUSP00000034026,ENSMUSP00000119057,ENSMUSP00000019997,ENSMUSP00000022419,ENSMUSP00000051492,ENSMUSP00000025263,ENSMUSP00000133302,ENSMUSP00000035065,ENSMUSP00000090897,ENSMUSP00000059977,ENSMUSP00000071130,…
4	GO:0009410	response to xenobiotic stimulus	Biological Process	10	ENSMUSP00000074885,ENSMUSP00000041175,ENSMUSP00000132180,ENSMUSP00000026211,ENSMUSP00000126067,ENSMUSP00000037206,ENSMUSP00000028881,ENSMUSP00000000505,ENSMUSP00000028071,ENSMUSP00000000769
4	GO:0009593	detection of chemical stimulus	Biological Process	4	ENSMUSP00000024791,ENSMUSP00000149022,ENSMUSP00000150761,ENSMUSP00000143864
4	GO:0010033	response to organic substance	Biological Process	115	ENSMUSP00000007799,ENSMUSP00000095171,ENSMUSP00000074885,ENSMUSP00000056669,ENSMUSP00000019997,ENSMUSP00000099534,ENSMUSP00000031327,ENSMUSP00000027961,ENSMUSP00000034026,ENSMUSP00000145451,ENSMUSP00000023809,ENSMUSP00000086094,ENSMUSP00000112675,ENSMUSP00000029711,ENSMUSP00000126067,ENSMUSP00000051492,ENSMUSP00000087119,ENSMUSP00000018610,ENSMUSP00000080998,ENSMUSP00000028881,ENSMUSP00000020964,…
4	GO:0010035	response to inorganic substance	Biological Process	30	ENSMUSP00000037206,ENSMUSP00000126067,ENSMUSP00000035065,ENSMUSP00000007272,ENSMUSP00000028881,ENSMUSP00000092041,ENSMUSP00000034214,ENSMUSP00000099534,ENSMUSP00000056669,ENSMUSP00000020964,ENSMUSP00000141022,ENSMUSP00000028882,ENSMUSP00000080993,ENSMUSP00000111309,ENSMUSP00000070868,ENSMUSP00000141648,ENSMUSP00000007799,ENSMUSP00000099916,ENSMUSP00000019997,ENSMUSP00000022419,ENSMUSP00000051492,…
4	GO:0046685	response to arsenic-containing substance	Biological Process	2	ENSMUSP00000022419,ENSMUSP00000000769
4	GO:0046677	response to antibiotic	Biological Process	14	ENSMUSP00000028881,ENSMUSP00000020964,ENSMUSP00000141022,ENSMUSP00000087736,ENSMUSP00000056669,ENSMUSP00000127646,ENSMUSP00000022176,ENSMUSP00000034026,ENSMUSP00000119057,ENSMUSP00000019997,ENSMUSP00000022419,ENSMUSP00000051492,ENSMUSP00000070868,ENSMUSP00000111309
4	GO:0097329	response to antimetabolite	Biological Process	1	ENSMUSP00000111204
4	GO:1901698	response to nitrogen compound	Biological Process	33	ENSMUSP00000074885,ENSMUSP00000086094,ENSMUSP00000112675,ENSMUSP00000029711,ENSMUSP00000126067,ENSMUSP00000035065,ENSMUSP00000025263,ENSMUSP00000020543,ENSMUSP00000069850,ENSMUSP00000037206,ENSMUSP00000111204,ENSMUSP00000019997,ENSMUSP00000024791,ENSMUSP00000061474,ENSMUSP00000103056,ENSMUSP00000027015,ENSMUSP00000028881,ENSMUSP00000004910,ENSMUSP00000062576,ENSMUSP00000127716,ENSMUSP00000023583,…
4	GO:1901700	response to oxygen-containing compound	Biological Process	61	ENSMUSP00000086094,ENSMUSP00000112675,ENSMUSP00000029711,ENSMUSP00000126067,ENSMUSP00000028881,ENSMUSP00000020964,ENSMUSP00000004910,ENSMUSP00000035065,ENSMUSP00000015596,ENSMUSP00000025263,ENSMUSP00000020543,ENSMUSP00000069850,ENSMUSP00000111204,ENSMUSP00000056669,ENSMUSP00000024791,ENSMUSP00000039600,ENSMUSP00000001008,ENSMUSP00000022124,ENSMUSP00000004949,ENSMUSP00000089051,ENSMUSP00000089948,…
4	GO:1990834	response to odorant	Biological Process	1	ENSMUSP00000087119
4	GO:0071391	cellular response to estrogen stimulus	Biological Process	1	ENSMUSP00000133360
4	GO:0050906	detection of stimulus involved in sensory perception	Biological Process	4	ENSMUSP00000149022,ENSMUSP00000150761,ENSMUSP00000143864,ENSMUSP00000025263
4	GO:0007597	blood coagulation, intrinsic pathway	Biological Process	1	ENSMUSP00000000049
4	GO:0072378	blood coagulation, fibrin clot formation	Biological Process	2	ENSMUSP00000000049,ENSMUSP00000141648
4	GO:0033750	ribosome localization	Biological Process	2	ENSMUSP00000033282,ENSMUSP00000069004
4	GO:0071426	ribonucleoprotein complex export from nucleus	Biological Process	3	ENSMUSP00000033282,ENSMUSP00000069004,ENSMUSP00000100863
4	GO:0099590	neurotransmitter receptor internalization	Biological Process	1	ENSMUSP00000033560
4	GO:0008104	protein localization	Biological Process	96	ENSMUSP00000033282,ENSMUSP00000069004,ENSMUSP00000025263,ENSMUSP00000137310,ENSMUSP00000100863,ENSMUSP00000084257,ENSMUSP00000099879,ENSMUSP00000062983,ENSMUSP00000042053,ENSMUSP00000032888,ENSMUSP00000029414,ENSMUSP00000091692,ENSMUSP00000002855,ENSMUSP00000027492,ENSMUSP00000095171,ENSMUSP00000022429,ENSMUSP00000033160,ENSMUSP00000033900,ENSMUSP00000020653,ENSMUSP00000018610,ENSMUSP00000028881,…
4	GO:0006403	RNA localization	Biological Process	8	ENSMUSP00000033282,ENSMUSP00000069004,ENSMUSP00000100863,ENSMUSP00000017384,ENSMUSP00000084257,ENSMUSP00000078123,ENSMUSP00000046732,ENSMUSP00000099879
4	GO:0010876	lipid localization	Biological Process	18	ENSMUSP00000133302,ENSMUSP00000034713,ENSMUSP00000074872,ENSMUSP00000002737,ENSMUSP00000080974,ENSMUSP00000112675,ENSMUSP00000025500,ENSMUSP00000029257,ENSMUSP00000026262,ENSMUSP00000007799,ENSMUSP00000025263,ENSMUSP00000028881,ENSMUSP00000028882,ENSMUSP00000018610,ENSMUSP00000000049,ENSMUSP00000092041,ENSMUSP00000070868,ENSMUSP00000018645
4	GO:0070727	cellular macromolecule localization	Biological Process	57	ENSMUSP00000033282,ENSMUSP00000069004,ENSMUSP00000025263,ENSMUSP00000137310,ENSMUSP00000100863,ENSMUSP00000084257,ENSMUSP00000099879,ENSMUSP00000062983,ENSMUSP00000042053,ENSMUSP00000032888,ENSMUSP00000029414,ENSMUSP00000091692,ENSMUSP00000002855,ENSMUSP00000027492,ENSMUSP00000095171,ENSMUSP00000022429,ENSMUSP00000033160,ENSMUSP00000033900,ENSMUSP00000020653,ENSMUSP00000017384,ENSMUSP00000007799,…
4	GO:0006810	transport	Biological Process	143	ENSMUSP00000033282,ENSMUSP00000069004,ENSMUSP00000025263,ENSMUSP00000137310,ENSMUSP00000126067,ENSMUSP00000041503,ENSMUSP00000032888,ENSMUSP00000056715,ENSMUSP00000089051,ENSMUSP00000095171,ENSMUSP00000022576,ENSMUSP00000022787,ENSMUSP00000037023,ENSMUSP00000020653,ENSMUSP00000022429,ENSMUSP00000036614,ENSMUSP00000086025,ENSMUSP00000033160,ENSMUSP00000002855,ENSMUSP00000130684,ENSMUSP00000109639,…
4	GO:0045184	establishment of protein localization	Biological Process	72	ENSMUSP00000033282,ENSMUSP00000069004,ENSMUSP00000025263,ENSMUSP00000137310,ENSMUSP00000100863,ENSMUSP00000084257,ENSMUSP00000099879,ENSMUSP00000062983,ENSMUSP00000042053,ENSMUSP00000032888,ENSMUSP00000029414,ENSMUSP00000091692,ENSMUSP00000027492,ENSMUSP00000095171,ENSMUSP00000022429,ENSMUSP00000033160,ENSMUSP00000033900,ENSMUSP00000020653,ENSMUSP00000018610,ENSMUSP00000028881,ENSMUSP00000039600,…
4	GO:0051236	establishment of RNA localization	Biological Process	8	ENSMUSP00000033282,ENSMUSP00000069004,ENSMUSP00000100863,ENSMUSP00000084257,ENSMUSP00000078123,ENSMUSP00000046732,ENSMUSP00000099879,ENSMUSP00000017384
4	GO:0051649	establishment of localization in cell	Biological Process	54	ENSMUSP00000033282,ENSMUSP00000069004,ENSMUSP00000025263,ENSMUSP00000127990,ENSMUSP00000037000,ENSMUSP00000137310,ENSMUSP00000126067,ENSMUSP00000020653,ENSMUSP00000100863,ENSMUSP00000084257,ENSMUSP00000099879,ENSMUSP00000062983,ENSMUSP00000042053,ENSMUSP00000032888,ENSMUSP00000029414,ENSMUSP00000091692,ENSMUSP00000027492,ENSMUSP00000095171,ENSMUSP00000022429,ENSMUSP00000033160,ENSMUSP00000033900,…
4	GO:0051656	establishment of organelle localization	Biological Process	11	ENSMUSP00000033282,ENSMUSP00000069004,ENSMUSP00000127990,ENSMUSP00000037000,ENSMUSP00000020653,ENSMUSP00000047700,ENSMUSP00000101312,ENSMUSP00000089051,ENSMUSP00000038502,ENSMUSP00000036614,ENSMUSP00000126067
4	GO:0051208	sequestering of calcium ion	Biological Process	4	ENSMUSP00000020964,ENSMUSP00000001008,ENSMUSP00000037206,ENSMUSP00000126067
4	GO:0019915	lipid storage	Biological Process	8	ENSMUSP00000133302,ENSMUSP00000002737,ENSMUSP00000080974,ENSMUSP00000112675,ENSMUSP00000025263,ENSMUSP00000028881,ENSMUSP00000026262,ENSMUSP00000007799
4	GO:0045185	maintenance of protein location	Biological Process	3	ENSMUSP00000002855,ENSMUSP00000007799,ENSMUSP00000144369
4	GO:0046907	intracellular transport	Biological Process	43	ENSMUSP00000033282,ENSMUSP00000069004,ENSMUSP00000025263,ENSMUSP00000137310,ENSMUSP00000020653,ENSMUSP00000100863,ENSMUSP00000084257,ENSMUSP00000099879,ENSMUSP00000062983,ENSMUSP00000042053,ENSMUSP00000032888,ENSMUSP00000029414,ENSMUSP00000091692,ENSMUSP00000027492,ENSMUSP00000095171,ENSMUSP00000022429,ENSMUSP00000033160,ENSMUSP00000033900,ENSMUSP00000086025,ENSMUSP00000002855,ENSMUSP00000044877,…
4	GO:0051640	organelle localization	Biological Process	12	ENSMUSP00000033282,ENSMUSP00000069004,ENSMUSP00000127990,ENSMUSP00000037000,ENSMUSP00000020653,ENSMUSP00000089051,ENSMUSP00000047700,ENSMUSP00000101312,ENSMUSP00000038502,ENSMUSP00000036614,ENSMUSP00000126067,ENSMUSP00000039604
4	GO:0051668	localization within membrane	Biological Process	2	ENSMUSP00000133302,ENSMUSP00000033560
4	GO:0071166	ribonucleoprotein complex localization	Biological Process	3	ENSMUSP00000033282,ENSMUSP00000069004,ENSMUSP00000100863
4	GO:0051642	centrosome localization	Biological Process	1	ENSMUSP00000101312
4	GO:0044766	multi-organism transport	Biological Process	1	ENSMUSP00000007799
4	GO:0001562	response to protozoan	Biological Process	3	ENSMUSP00000132435,ENSMUSP00000063390,ENSMUSP00000122787
4	GO:0019730	antimicrobial humoral response	Biological Process	4	ENSMUSP00000022722,ENSMUSP00000023788,ENSMUSP00000031327,ENSMUSP00000074885
4	GO:0009615	response to virus	Biological Process	17	ENSMUSP00000039600,ENSMUSP00000054637,ENSMUSP00000028259,ENSMUSP00000122787,ENSMUSP00000039604,ENSMUSP00000028881,ENSMUSP00000033053,ENSMUSP00000099888,ENSMUSP00000020970,ENSMUSP00000093816,ENSMUSP00000082548,ENSMUSP00000023693,ENSMUSP00000031542,ENSMUSP00000104548,ENSMUSP00000099890,ENSMUSP00000030636,ENSMUSP00000025263
4	GO:0009617	response to bacterium	Biological Process	45	ENSMUSP00000056669,ENSMUSP00000019997,ENSMUSP00000099534,ENSMUSP00000031327,ENSMUSP00000074885,ENSMUSP00000046199,ENSMUSP00000025263,ENSMUSP00000018610,ENSMUSP00000082548,ENSMUSP00000032239,ENSMUSP00000122787,ENSMUSP00000069850,ENSMUSP00000023611,ENSMUSP00000023788,ENSMUSP00000080974,ENSMUSP00000132435,ENSMUSP00000063390,ENSMUSP00000024791,ENSMUSP00000028881,ENSMUSP00000039600,ENSMUSP00000001008,…
4	GO:0009620	response to fungus	Biological Process	1	ENSMUSP00000031327
4	GO:0098542	defense response to other organism	Biological Process	26	ENSMUSP00000039600,ENSMUSP00000054637,ENSMUSP00000046199,ENSMUSP00000025263,ENSMUSP00000018610,ENSMUSP00000082548,ENSMUSP00000032239,ENSMUSP00000122787,ENSMUSP00000069850,ENSMUSP00000023611,ENSMUSP00000023788,ENSMUSP00000080974,ENSMUSP00000132435,ENSMUSP00000063390,ENSMUSP00000028259,ENSMUSP00000039604,ENSMUSP00000028881,ENSMUSP00000033053,ENSMUSP00000099888,ENSMUSP00000020970,ENSMUSP00000093816,…
4	GO:0044403	symbiont process	Biological Process	26	ENSMUSP00000055714,ENSMUSP00000022830,ENSMUSP00000062576,ENSMUSP00000121848,ENSMUSP00000044050,ENSMUSP00000007799,ENSMUSP00000133302,ENSMUSP00000048901,ENSMUSP00000062277,ENSMUSP00000033264,ENSMUSP00000080974,ENSMUSP00000015981,ENSMUSP00000025263,ENSMUSP00000039600,ENSMUSP00000001008,ENSMUSP00000023788,ENSMUSP00000083587,ENSMUSP00000132435,ENSMUSP00000028241,ENSMUSP00000116259,ENSMUSP00000020970,…
4	GO:0035821	modification of morphology or physiology of other organism	Biological Process	7	ENSMUSP00000039600,ENSMUSP00000001008,ENSMUSP00000062576,ENSMUSP00000133302,ENSMUSP00000028241,ENSMUSP00000018610,ENSMUSP00000031327
4	GO:0051701	interaction with host	Biological Process	6	ENSMUSP00000121848,ENSMUSP00000044050,ENSMUSP00000007799,ENSMUSP00000095171,ENSMUSP00000033264,ENSMUSP00000062277
4	GO:0051702	interaction with symbiont	Biological Process	7	ENSMUSP00000039600,ENSMUSP00000001008,ENSMUSP00000062576,ENSMUSP00000133302,ENSMUSP00000028241,ENSMUSP00000031327,ENSMUSP00000054499
4	GO:0052047	interaction with other organism via secreted substance involved in symbiotic interaction	Biological Process	1	ENSMUSP00000054499
4	GO:0001505	regulation of neurotransmitter levels	Biological Process	17	ENSMUSP00000043088,ENSMUSP00000126067,ENSMUSP00000025263,ENSMUSP00000041503,ENSMUSP00000032888,ENSMUSP00000018610,ENSMUSP00000099617,ENSMUSP00000089051,ENSMUSP00000020278,ENSMUSP00000038502,ENSMUSP00000023832,ENSMUSP00000007799,ENSMUSP00000083587,ENSMUSP00000080974,ENSMUSP00000035065,ENSMUSP00000028881,ENSMUSP00000087405
4	GO:0002026	regulation of the force of heart contraction	Biological Process	1	ENSMUSP00000007799
4	GO:0002027	regulation of heart rate	Biological Process	3	ENSMUSP00000020964,ENSMUSP00000087405,ENSMUSP00000007799
4	GO:0006450	regulation of translational fidelity	Biological Process	2	ENSMUSP00000048099,ENSMUSP00000027961
4	GO:0008217	regulation of blood pressure	Biological Process	6	ENSMUSP00000080974,ENSMUSP00000064536,ENSMUSP00000087405,ENSMUSP00000018610,ENSMUSP00000035065,ENSMUSP00000059977
4	GO:0008360	regulation of cell shape	Biological Process	6	ENSMUSP00000054499,ENSMUSP00000083587,ENSMUSP00000025523,ENSMUSP00000106087,ENSMUSP00000085566,ENSMUSP00000001008
4	GO:0010817	regulation of hormone levels	Biological Process	16	ENSMUSP00000027053,ENSMUSP00000027989,ENSMUSP00000025263,ENSMUSP00000018610,ENSMUSP00000028881,ENSMUSP00000039600,ENSMUSP00000020278,ENSMUSP00000038502,ENSMUSP00000020964,ENSMUSP00000020312,ENSMUSP00000064536,ENSMUSP00000059977,ENSMUSP00000092041,ENSMUSP00000022176,ENSMUSP00000058042,ENSMUSP00000141648
4	GO:0010883	regulation of lipid storage	Biological Process	3	ENSMUSP00000080974,ENSMUSP00000112675,ENSMUSP00000002737
4	GO:0031647	regulation of protein stability	Biological Process	10	ENSMUSP00000099907,ENSMUSP00000089051,ENSMUSP00000144369,ENSMUSP00000062983,ENSMUSP00000065719,ENSMUSP00000039604,ENSMUSP00000112600,ENSMUSP00000033264,ENSMUSP00000126067,ENSMUSP00000032198
4	GO:0032204	regulation of telomere maintenance	Biological Process	1	ENSMUSP00000086459
4	GO:0035633	maintenance of permeability of blood-brain barrier	Biological Process	2	ENSMUSP00000035065,ENSMUSP00000059977
4	GO:0042391	regulation of membrane potential	Biological Process	11	ENSMUSP00000041503,ENSMUSP00000020964,ENSMUSP00000028515,ENSMUSP00000025263,ENSMUSP00000127716,ENSMUSP00000039604,ENSMUSP00000027015,ENSMUSP00000007799,ENSMUSP00000126067,ENSMUSP00000064536,ENSMUSP00000053394
4	GO:0042592	homeostatic process	Biological Process	74	ENSMUSP00000020931,ENSMUSP00000018985,ENSMUSP00000028881,ENSMUSP00000028882,ENSMUSP00000062576,ENSMUSP00000062277,ENSMUSP00000052465,ENSMUSP00000019997,ENSMUSP00000069851,ENSMUSP00000095171,ENSMUSP00000025476,ENSMUSP00000035658,ENSMUSP00000141022,ENSMUSP00000133302,ENSMUSP00000039600,ENSMUSP00000023832,ENSMUSP00000007799,ENSMUSP00000001008,ENSMUSP00000104485,ENSMUSP00000042918,ENSMUSP00000048770,…
4	GO:0043114	regulation of vascular permeability	Biological Process	1	ENSMUSP00000020278
4	GO:0045124	regulation of bone resorption	Biological Process	2	ENSMUSP00000023583,ENSMUSP00000025523
4	GO:0045646	regulation of erythrocyte differentiation	Biological Process	2	ENSMUSP00000082548,ENSMUSP00000099534
4	GO:0048167	regulation of synaptic plasticity	Biological Process	6	ENSMUSP00000035065,ENSMUSP00000126067,ENSMUSP00000089051,ENSMUSP00000015596,ENSMUSP00000133302,ENSMUSP00000015981
4	GO:0050803	regulation of synapse structure or activity	Biological Process	4	ENSMUSP00000025263,ENSMUSP00000101734,ENSMUSP00000133302,ENSMUSP00000126067
4	GO:0050878	regulation of body fluid levels	Biological Process	15	ENSMUSP00000064536,ENSMUSP00000083204,ENSMUSP00000141648,ENSMUSP00000022576,ENSMUSP00000000049,ENSMUSP00000033821,ENSMUSP00000007799,ENSMUSP00000103056,ENSMUSP00000133302,ENSMUSP00000080974,ENSMUSP00000007280,ENSMUSP00000023790,ENSMUSP00000030636,ENSMUSP00000050374,ENSMUSP00000089051
4	GO:0061635	regulation of protein complex stability	Biological Process	1	ENSMUSP00000015981
4	GO:0090066	regulation of anatomical structure size	Biological Process	20	ENSMUSP00000038106,ENSMUSP00000071715,ENSMUSP00000064536,ENSMUSP00000052465,ENSMUSP00000099907,ENSMUSP00000047275,ENSMUSP00000083587,ENSMUSP00000007799,ENSMUSP00000133302,ENSMUSP00000004968,ENSMUSP00000087405,ENSMUSP00000054499,ENSMUSP00000004910,ENSMUSP00000130684,ENSMUSP00000035065,ENSMUSP00000059977,ENSMUSP00000141648,ENSMUSP00000049440,ENSMUSP00000096152,ENSMUSP00000022176
4	GO:0090559	regulation of membrane permeability	Biological Process	3	ENSMUSP00000022419,ENSMUSP00000039604,ENSMUSP00000002737
4	GO:0097035	regulation of membrane lipid distribution	Biological Process	2	ENSMUSP00000104272,ENSMUSP00000029257
4	GO:0099072	regulation of postsynaptic membrane neurotransmitter receptor levels	Biological Process	1	ENSMUSP00000033560
4	GO:0099149	regulation of postsynaptic neurotransmitter receptor internalization	Biological Process	1	ENSMUSP00000033560
4	GO:0010469	regulation of signaling receptor activity	Biological Process	13	ENSMUSP00000031840,ENSMUSP00000025263,ENSMUSP00000055714,ENSMUSP00000028881,ENSMUSP00000031327,ENSMUSP00000019064,ENSMUSP00000039600,ENSMUSP00000028882,ENSMUSP00000021970,ENSMUSP00000074885,ENSMUSP00000019266,ENSMUSP00000054637,ENSMUSP00000001008
4	GO:0032409	regulation of transporter activity	Biological Process	10	ENSMUSP00000022419,ENSMUSP00000126067,ENSMUSP00000064536,ENSMUSP00000037206,ENSMUSP00000020964,ENSMUSP00000015596,ENSMUSP00000028241,ENSMUSP00000023832,ENSMUSP00000007799,ENSMUSP00000125398
4	GO:0044092	negative regulation of molecular function	Biological Process	29	ENSMUSP00000007799,ENSMUSP00000023832,ENSMUSP00000035061,ENSMUSP00000032228,ENSMUSP00000025263,ENSMUSP00000046530,ENSMUSP00000000769,ENSMUSP00000023583,ENSMUSP00000028233,ENSMUSP00000019997,ENSMUSP00000033264,ENSMUSP00000099890,ENSMUSP00000126067,ENSMUSP00000037206,ENSMUSP00000047202,ENSMUSP00000020964,ENSMUSP00000022419,ENSMUSP00000035065,ENSMUSP00000050374,ENSMUSP00000032888,ENSMUSP00000033570,…
4	GO:0044093	positive regulation of molecular function	Biological Process	56	ENSMUSP00000025263,ENSMUSP00000040307,ENSMUSP00000086459,ENSMUSP00000095171,ENSMUSP00000028881,ENSMUSP00000071715,ENSMUSP00000027015,ENSMUSP00000126067,ENSMUSP00000039604,ENSMUSP00000033721,ENSMUSP00000080717,ENSMUSP00000004949,ENSMUSP00000022830,ENSMUSP00000023832,ENSMUSP00000019470,ENSMUSP00000054499,ENSMUSP00000007799,ENSMUSP00000018610,ENSMUSP00000022429,ENSMUSP00000039600,ENSMUSP00000099534,…
4	GO:0050790	regulation of catalytic activity	Biological Process	66	ENSMUSP00000050374,ENSMUSP00000033282,ENSMUSP00000025263,ENSMUSP00000040307,ENSMUSP00000086459,ENSMUSP00000095171,ENSMUSP00000028881,ENSMUSP00000071715,ENSMUSP00000007799,ENSMUSP00000023832,ENSMUSP00000027015,ENSMUSP00000126067,ENSMUSP00000039604,ENSMUSP00000033721,ENSMUSP00000080717,ENSMUSP00000004949,ENSMUSP00000035061,ENSMUSP00000032228,ENSMUSP00000022419,ENSMUSP00000022830,ENSMUSP00000019470,…
4	GO:0051090	regulation of DNA-binding transcription factor activity	Biological Process	19	ENSMUSP00000019997,ENSMUSP00000033264,ENSMUSP00000037028,ENSMUSP00000032194,ENSMUSP00000025263,ENSMUSP00000055714,ENSMUSP00000028881,ENSMUSP00000062277,ENSMUSP00000065719,ENSMUSP00000058629,ENSMUSP00000004949,ENSMUSP00000083587,ENSMUSP00000080974,ENSMUSP00000074471,ENSMUSP00000022830,ENSMUSP00000047333,ENSMUSP00000042987,ENSMUSP00000130759,ENSMUSP00000015596
4	GO:0051098	regulation of binding	Biological Process	13	ENSMUSP00000099890,ENSMUSP00000007799,ENSMUSP00000099534,ENSMUSP00000037206,ENSMUSP00000015236,ENSMUSP00000080974,ENSMUSP00000015596,ENSMUSP00000139147,ENSMUSP00000030636,ENSMUSP00000133302,ENSMUSP00000062576,ENSMUSP00000047333,ENSMUSP00000004949
4	GO:1905255	regulation of RNA binding transcription factor activity	Biological Process	1	ENSMUSP00000062576
4	GO:0022613	ribonucleoprotein complex biogenesis	Biological Process	19	ENSMUSP00000023217,ENSMUSP00000001485,ENSMUSP00000069004,ENSMUSP00000033282,ENSMUSP00000022203,ENSMUSP00000035644,ENSMUSP00000116259,ENSMUSP00000086987,ENSMUSP00000112977,ENSMUSP00000109257,ENSMUSP00000131489,ENSMUSP00000052465,ENSMUSP00000027492,ENSMUSP00000112213,ENSMUSP00000051492,ENSMUSP00000056715,ENSMUSP00000102213,ENSMUSP00000001611,ENSMUSP00000035179
4	GO:0044091	membrane biogenesis	Biological Process	2	ENSMUSP00000019945,ENSMUSP00000007799
4	GO:0140112	extracellular vesicle biogenesis	Biological Process	1	ENSMUSP00000017153
4	GO:0010273	detoxification of copper ion	Biological Process	1	ENSMUSP00000034214
5	GO:0007292	female gamete generation	Biological Process	5	ENSMUSP00000070868,ENSMUSP00000035065,ENSMUSP00000028881,ENSMUSP00000034026,ENSMUSP00000085423
5	GO:0048232	male gamete generation	Biological Process	6	ENSMUSP00000151886,ENSMUSP00000023832,ENSMUSP00000085423,ENSMUSP00000094211,ENSMUSP00000034746,ENSMUSP00000051492
5	GO:0022904	respiratory electron transport chain	Biological Process	6	ENSMUSP00000000175,ENSMUSP00000054856,ENSMUSP00000115419,ENSMUSP00000080993,ENSMUSP00000126067,ENSMUSP00000066303
5	GO:0006112	energy reserve metabolic process	Biological Process	3	ENSMUSP00000083474,ENSMUSP00000050788,ENSMUSP00000026617
5	GO:0045333	cellular respiration	Biological Process	7	ENSMUSP00000000175,ENSMUSP00000054856,ENSMUSP00000115419,ENSMUSP00000080993,ENSMUSP00000126067,ENSMUSP00000066303,ENSMUSP00000041380
5	GO:0018171	peptidyl-cysteine oxidation	Biological Process	1	ENSMUSP00000041380
5	GO:0019395	fatty acid oxidation	Biological Process	1	ENSMUSP00000080974
5	GO:0042430	indole-containing compound metabolic process	Biological Process	1	ENSMUSP00000087405
5	GO:0043603	cellular amide metabolic process	Biological Process	36	ENSMUSP00000027961,ENSMUSP00000117834,ENSMUSP00000102213,ENSMUSP00000099916,ENSMUSP00000003521,ENSMUSP00000106250,ENSMUSP00000116746,ENSMUSP00000069004,ENSMUSP00000112977,ENSMUSP00000053403,ENSMUSP00000020543,ENSMUSP00000131489,ENSMUSP00000022600,ENSMUSP00000044497,ENSMUSP00000066990,ENSMUSP00000078123,ENSMUSP00000001485,ENSMUSP00000004910,ENSMUSP00000129789,ENSMUSP00000133175,ENSMUSP00000100863,…
5	GO:0044106	cellular amine metabolic process	Biological Process	1	ENSMUSP00000126067
5	GO:0044270	cellular nitrogen compound catabolic process	Biological Process	8	ENSMUSP00000129789,ENSMUSP00000020801,ENSMUSP00000017384,ENSMUSP00000047333,ENSMUSP00000035179,ENSMUSP00000018645,ENSMUSP00000025050,ENSMUSP00000023832
5	GO:0044271	cellular nitrogen compound biosynthetic process	Biological Process	125	ENSMUSP00000080974,ENSMUSP00000053916,ENSMUSP00000015981,ENSMUSP00000025263,ENSMUSP00000055714,ENSMUSP00000064680,ENSMUSP00000137253,ENSMUSP00000028881,ENSMUSP00000089948,ENSMUSP00000035644,ENSMUSP00000077971,ENSMUSP00000047333,ENSMUSP00000119057,ENSMUSP00000033570,ENSMUSP00000028071,ENSMUSP00000112675,ENSMUSP00000007799,ENSMUSP00000069850,ENSMUSP00000032194,ENSMUSP00000103056,ENSMUSP00000088291,…
5	GO:0072521	purine-containing compound metabolic process	Biological Process	22	ENSMUSP00000047333,ENSMUSP00000080993,ENSMUSP00000000175,ENSMUSP00000054856,ENSMUSP00000115419,ENSMUSP00000031542,ENSMUSP00000030583,ENSMUSP00000132590,ENSMUSP00000016396,ENSMUSP00000126067,ENSMUSP00000022176,ENSMUSP00000064330,ENSMUSP00000129704,ENSMUSP00000018610,ENSMUSP00000006557,ENSMUSP00000035179,ENSMUSP00000066303,ENSMUSP00000026972,ENSMUSP00000018645,ENSMUSP00000022419,ENSMUSP00000025050,…
5	GO:0072524	pyridine-containing compound metabolic process	Biological Process	2	ENSMUSP00000047333,ENSMUSP00000018645
5	GO:0072527	pyrimidine-containing compound metabolic process	Biological Process	1	ENSMUSP00000132590
5	GO:0010899	regulation of phosphatidylcholine catabolic process	Biological Process	1	ENSMUSP00000034713
5	GO:0019219	regulation of nucleobase-containing compound metabolic process	Biological Process	92	ENSMUSP00000080974,ENSMUSP00000053916,ENSMUSP00000015981,ENSMUSP00000025263,ENSMUSP00000055714,ENSMUSP00000064680,ENSMUSP00000137253,ENSMUSP00000028881,ENSMUSP00000089948,ENSMUSP00000035644,ENSMUSP00000077971,ENSMUSP00000047333,ENSMUSP00000119057,ENSMUSP00000033570,ENSMUSP00000028071,ENSMUSP00000112675,ENSMUSP00000007799,ENSMUSP00000069850,ENSMUSP00000032194,ENSMUSP00000103056,ENSMUSP00000088291,…
5	GO:0033238	regulation of cellular amine metabolic process	Biological Process	1	ENSMUSP00000126067
5	GO:0034248	regulation of cellular amide metabolic process	Biological Process	11	ENSMUSP00000020543,ENSMUSP00000129789,ENSMUSP00000102213,ENSMUSP00000133175,ENSMUSP00000100863,ENSMUSP00000017384,ENSMUSP00000126067,ENSMUSP00000079699,ENSMUSP00000025263,ENSMUSP00000017332,ENSMUSP00000133302
5	GO:0045428	regulation of nitric oxide biosynthetic process	Biological Process	7	ENSMUSP00000023832,ENSMUSP00000007799,ENSMUSP00000083587,ENSMUSP00000080974,ENSMUSP00000035065,ENSMUSP00000025263,ENSMUSP00000028881
5	GO:0051246	regulation of protein metabolic process	Biological Process	101	ENSMUSP00000050374,ENSMUSP00000033282,ENSMUSP00000025263,ENSMUSP00000040307,ENSMUSP00000086459,ENSMUSP00000095171,ENSMUSP00000028881,ENSMUSP00000071715,ENSMUSP00000007799,ENSMUSP00000054499,ENSMUSP00000069851,ENSMUSP00000037206,ENSMUSP00000127716,ENSMUSP00000126067,ENSMUSP00000023832,ENSMUSP00000027367,ENSMUSP00000065719,ENSMUSP00000015596,ENSMUSP00000031840,ENSMUSP00000025523,ENSMUSP00000015981,…
5	GO:1905627	regulation of serotonin biosynthetic process	Biological Process	1	ENSMUSP00000087405
5	GO:2001245	regulation of phosphatidylcholine biosynthetic process	Biological Process	1	ENSMUSP00000022099
5	GO:0033239	negative regulation of cellular amine metabolic process	Biological Process	1	ENSMUSP00000126067
5	GO:0034249	negative regulation of cellular amide metabolic process	Biological Process	3	ENSMUSP00000133302,ENSMUSP00000126067,ENSMUSP00000020543
5	GO:0045934	negative regulation of nucleobase-containing compound metabolic process	Biological Process	39	ENSMUSP00000080974,ENSMUSP00000053916,ENSMUSP00000015981,ENSMUSP00000025263,ENSMUSP00000055714,ENSMUSP00000064680,ENSMUSP00000137253,ENSMUSP00000028881,ENSMUSP00000089948,ENSMUSP00000035644,ENSMUSP00000077971,ENSMUSP00000047333,ENSMUSP00000119057,ENSMUSP00000033570,ENSMUSP00000028071,ENSMUSP00000112675,ENSMUSP00000007799,ENSMUSP00000069850,ENSMUSP00000032194,ENSMUSP00000103056,ENSMUSP00000088291,…
5	GO:0051248	negative regulation of protein metabolic process	Biological Process	43	ENSMUSP00000007799,ENSMUSP00000037206,ENSMUSP00000127716,ENSMUSP00000126067,ENSMUSP00000023832,ENSMUSP00000027367,ENSMUSP00000065719,ENSMUSP00000015596,ENSMUSP00000035061,ENSMUSP00000032228,ENSMUSP00000022576,ENSMUSP00000046530,ENSMUSP00000000769,ENSMUSP00000023583,ENSMUSP00000028233,ENSMUSP00000019997,ENSMUSP00000082548,ENSMUSP00000133302,ENSMUSP00000086094,ENSMUSP00000065423,ENSMUSP00000047202,…
5	GO:1904406	negative regulation of nitric oxide metabolic process	Biological Process	2	ENSMUSP00000023832,ENSMUSP00000007799
5	GO:2001246	negative regulation of phosphatidylcholine biosynthetic process	Biological Process	1	ENSMUSP00000022099
5	GO:0045935	positive regulation of nucleobase-containing compound metabolic process	Biological Process	34	ENSMUSP00000018610,ENSMUSP00000086459,ENSMUSP00000001583,ENSMUSP00000051492,ENSMUSP00000095171,ENSMUSP00000025263,ENSMUSP00000086094,ENSMUSP00000028881,ENSMUSP00000025444,ENSMUSP00000058629,ENSMUSP00000069850,ENSMUSP00000104548,ENSMUSP00000151388,ENSMUSP00000109884,ENSMUSP00000129001,ENSMUSP00000022429,ENSMUSP00000062576,ENSMUSP00000006625,ENSMUSP00000115044,ENSMUSP00000064680,ENSMUSP00000127716,…
5	GO:0034250	positive regulation of cellular amide metabolic process	Biological Process	4	ENSMUSP00000079699,ENSMUSP00000129789,ENSMUSP00000025263,ENSMUSP00000017332
5	GO:0051247	positive regulation of protein metabolic process	Biological Process	62	ENSMUSP00000025263,ENSMUSP00000040307,ENSMUSP00000086459,ENSMUSP00000095171,ENSMUSP00000028881,ENSMUSP00000071715,ENSMUSP00000031840,ENSMUSP00000025523,ENSMUSP00000015981,ENSMUSP00000122787,ENSMUSP00000027639,ENSMUSP00000058629,ENSMUSP00000029711,ENSMUSP00000015596,ENSMUSP00000027015,ENSMUSP00000126067,ENSMUSP00000039604,ENSMUSP00000080717,ENSMUSP00000004949,ENSMUSP00000120466,ENSMUSP00000053394,…
5	GO:1904407	positive regulation of nitric oxide metabolic process	Biological Process	5	ENSMUSP00000083587,ENSMUSP00000080974,ENSMUSP00000035065,ENSMUSP00000025263,ENSMUSP00000028881
5	GO:0042417	dopamine metabolic process	Biological Process	2	ENSMUSP00000126067,ENSMUSP00000087405
5	GO:0042428	serotonin metabolic process	Biological Process	1	ENSMUSP00000087405
5	GO:0046469	platelet activating factor metabolic process	Biological Process	1	ENSMUSP00000024706
5	GO:0046470	phosphatidylcholine metabolic process	Biological Process	2	ENSMUSP00000034713,ENSMUSP00000022099
5	GO:0046519	sphingoid metabolic process	Biological Process	1	ENSMUSP00000064423
5	GO:0006022	aminoglycan metabolic process	Biological Process	5	ENSMUSP00000026262,ENSMUSP00000031103,ENSMUSP00000005173,ENSMUSP00000046530,ENSMUSP00000028881
5	GO:0006518	peptide metabolic process	Biological Process	31	ENSMUSP00000027961,ENSMUSP00000117834,ENSMUSP00000102213,ENSMUSP00000099916,ENSMUSP00000003521,ENSMUSP00000106250,ENSMUSP00000116746,ENSMUSP00000069004,ENSMUSP00000112977,ENSMUSP00000053403,ENSMUSP00000020543,ENSMUSP00000131489,ENSMUSP00000022600,ENSMUSP00000044497,ENSMUSP00000066990,ENSMUSP00000078123,ENSMUSP00000001485,ENSMUSP00000004910,ENSMUSP00000129789,ENSMUSP00000133175,ENSMUSP00000100863,…
5	GO:0006584	catecholamine metabolic process	Biological Process	2	ENSMUSP00000126067,ENSMUSP00000087405
5	GO:0006665	sphingolipid metabolic process	Biological Process	4	ENSMUSP00000064423,ENSMUSP00000026262,ENSMUSP00000060462,ENSMUSP00000006557
5	GO:0009116	nucleoside metabolic process	Biological Process	2	ENSMUSP00000132590,ENSMUSP00000129704
5	GO:0009308	amine metabolic process	Biological Process	1	ENSMUSP00000126067
5	GO:0042558	pteridine-containing compound metabolic process	Biological Process	1	ENSMUSP00000087405
5	GO:0043545	molybdopterin cofactor metabolic process	Biological Process	1	ENSMUSP00000096670
5	GO:1901160	primary amino compound metabolic process	Biological Process	1	ENSMUSP00000087405
5	GO:1901565	organonitrogen compound catabolic process	Biological Process	36	ENSMUSP00000082548,ENSMUSP00000005173,ENSMUSP00000062277,ENSMUSP00000032198,ENSMUSP00000133175,ENSMUSP00000047202,ENSMUSP00000094225,ENSMUSP00000061305,ENSMUSP00000018610,ENSMUSP00000121736,ENSMUSP00000026262,ENSMUSP00000019470,ENSMUSP00000034713,ENSMUSP00000002274,ENSMUSP00000031072,ENSMUSP00000057573,ENSMUSP00000008748,ENSMUSP00000086094,ENSMUSP00000065423,ENSMUSP00000115044,ENSMUSP00000133302,…
5	GO:1901566	organonitrogen compound biosynthetic process	Biological Process	63	ENSMUSP00000027961,ENSMUSP00000117834,ENSMUSP00000102213,ENSMUSP00000026262,ENSMUSP00000031103,ENSMUSP00000047333,ENSMUSP00000031542,ENSMUSP00000030583,ENSMUSP00000132590,ENSMUSP00000003521,ENSMUSP00000106250,ENSMUSP00000116746,ENSMUSP00000069004,ENSMUSP00000112977,ENSMUSP00000053403,ENSMUSP00000020543,ENSMUSP00000131489,ENSMUSP00000022600,ENSMUSP00000044497,ENSMUSP00000066990,ENSMUSP00000078123,…
5	GO:0046209	nitric oxide metabolic process	Biological Process	9	ENSMUSP00000018610,ENSMUSP00000099617,ENSMUSP00000023832,ENSMUSP00000007799,ENSMUSP00000083587,ENSMUSP00000080974,ENSMUSP00000035065,ENSMUSP00000025263,ENSMUSP00000028881
5	GO:0031329	regulation of cellular catabolic process	Biological Process	23	ENSMUSP00000047333,ENSMUSP00000019470,ENSMUSP00000027015,ENSMUSP00000063390,ENSMUSP00000019997,ENSMUSP00000033264,ENSMUSP00000015596,ENSMUSP00000034713,ENSMUSP00000000049,ENSMUSP00000035658,ENSMUSP00000008748,ENSMUSP00000086094,ENSMUSP00000065423,ENSMUSP00000115044,ENSMUSP00000133302,ENSMUSP00000025263,ENSMUSP00000028881,ENSMUSP00000018645,ENSMUSP00000033560,ENSMUSP00000023832,ENSMUSP00000126067,…
5	GO:0042176	regulation of protein catabolic process	Biological Process	18	ENSMUSP00000019470,ENSMUSP00000008748,ENSMUSP00000086094,ENSMUSP00000065423,ENSMUSP00000115044,ENSMUSP00000133302,ENSMUSP00000018610,ENSMUSP00000025263,ENSMUSP00000019997,ENSMUSP00000062277,ENSMUSP00000022099,ENSMUSP00000064536,ENSMUSP00000028881,ENSMUSP00000033560,ENSMUSP00000023832,ENSMUSP00000043245,ENSMUSP00000126067,ENSMUSP00000034713
5	GO:0043470	regulation of carbohydrate catabolic process	Biological Process	2	ENSMUSP00000047333,ENSMUSP00000018645
5	GO:0050994	regulation of lipid catabolic process	Biological Process	4	ENSMUSP00000034713,ENSMUSP00000000049,ENSMUSP00000025263,ENSMUSP00000028881
5	GO:0031330	negative regulation of cellular catabolic process	Biological Process	9	ENSMUSP00000019997,ENSMUSP00000035658,ENSMUSP00000086094,ENSMUSP00000065423,ENSMUSP00000008748,ENSMUSP00000033560,ENSMUSP00000023832,ENSMUSP00000043245,ENSMUSP00000126067
5	GO:0042177	negative regulation of protein catabolic process	Biological Process	6	ENSMUSP00000086094,ENSMUSP00000065423,ENSMUSP00000033560,ENSMUSP00000043245,ENSMUSP00000126067,ENSMUSP00000018610
5	GO:0050995	negative regulation of lipid catabolic process	Biological Process	2	ENSMUSP00000025263,ENSMUSP00000028881
5	GO:0031331	positive regulation of cellular catabolic process	Biological Process	13	ENSMUSP00000033264,ENSMUSP00000015596,ENSMUSP00000034713,ENSMUSP00000000049,ENSMUSP00000115044,ENSMUSP00000133302,ENSMUSP00000025263,ENSMUSP00000028881,ENSMUSP00000065423,ENSMUSP00000023832,ENSMUSP00000126067,ENSMUSP00000019997,ENSMUSP00000039604
5	GO:0045732	positive regulation of protein catabolic process	Biological Process	10	ENSMUSP00000115044,ENSMUSP00000133302,ENSMUSP00000025263,ENSMUSP00000028881,ENSMUSP00000023832,ENSMUSP00000019997,ENSMUSP00000034713,ENSMUSP00000062277,ENSMUSP00000022099,ENSMUSP00000064536
5	GO:0050996	positive regulation of lipid catabolic process	Biological Process	3	ENSMUSP00000034713,ENSMUSP00000000049,ENSMUSP00000028881
5	GO:0016054	organic acid catabolic process	Biological Process	4	ENSMUSP00000018610,ENSMUSP00000121736,ENSMUSP00000026613,ENSMUSP00000019942
5	GO:0017001	antibiotic catabolic process	Biological Process	1	ENSMUSP00000126067
5	GO:0019439	aromatic compound catabolic process	Biological Process	8	ENSMUSP00000129789,ENSMUSP00000020801,ENSMUSP00000017384,ENSMUSP00000047333,ENSMUSP00000035179,ENSMUSP00000018645,ENSMUSP00000025050,ENSMUSP00000023832
5	GO:0032801	receptor catabolic process	Biological Process	1	ENSMUSP00000133302
5	GO:0042737	drug catabolic process	Biological Process	4	ENSMUSP00000041175,ENSMUSP00000132180,ENSMUSP00000026211,ENSMUSP00000126067
5	GO:0044242	cellular lipid catabolic process	Biological Process	7	ENSMUSP00000026262,ENSMUSP00000070868,ENSMUSP00000034713,ENSMUSP00000000049,ENSMUSP00000133302,ENSMUSP00000019942,ENSMUSP00000043088
5	GO:0044265	cellular macromolecule catabolic process	Biological Process	29	ENSMUSP00000129789,ENSMUSP00000020801,ENSMUSP00000017384,ENSMUSP00000082548,ENSMUSP00000035179,ENSMUSP00000062277,ENSMUSP00000032198,ENSMUSP00000133175,ENSMUSP00000047202,ENSMUSP00000094225,ENSMUSP00000061305,ENSMUSP00000019470,ENSMUSP00000005173,ENSMUSP00000031072,ENSMUSP00000057573,ENSMUSP00000008748,ENSMUSP00000086094,ENSMUSP00000065423,ENSMUSP00000115044,ENSMUSP00000133302,ENSMUSP00000055714,…
5	GO:0044275	cellular carbohydrate catabolic process	Biological Process	1	ENSMUSP00000026613
5	GO:0046700	heterocycle catabolic process	Biological Process	9	ENSMUSP00000129789,ENSMUSP00000020801,ENSMUSP00000017384,ENSMUSP00000047333,ENSMUSP00000035179,ENSMUSP00000121736,ENSMUSP00000018645,ENSMUSP00000025050,ENSMUSP00000023832
5	GO:0051187	cofactor catabolic process	Biological Process	1	ENSMUSP00000126067
5	GO:0046164	alcohol catabolic process	Biological Process	3	ENSMUSP00000133302,ENSMUSP00000036245,ENSMUSP00000025050
5	GO:0009057	macromolecule catabolic process	Biological Process	36	ENSMUSP00000129789,ENSMUSP00000020801,ENSMUSP00000017384,ENSMUSP00000082548,ENSMUSP00000005173,ENSMUSP00000035179,ENSMUSP00000062277,ENSMUSP00000032198,ENSMUSP00000133175,ENSMUSP00000047202,ENSMUSP00000094225,ENSMUSP00000061305,ENSMUSP00000019470,ENSMUSP00000002274,ENSMUSP00000031072,ENSMUSP00000057573,ENSMUSP00000008748,ENSMUSP00000086094,ENSMUSP00000065423,ENSMUSP00000115044,ENSMUSP00000133302,…
5	GO:0016042	lipid catabolic process	Biological Process	14	ENSMUSP00000026262,ENSMUSP00000133302,ENSMUSP00000036245,ENSMUSP00000070868,ENSMUSP00000034713,ENSMUSP00000000049,ENSMUSP00000019942,ENSMUSP00000043088,ENSMUSP00000025263,ENSMUSP00000028881,ENSMUSP00000067002,ENSMUSP00000024706,ENSMUSP00000081122,ENSMUSP00000105736
5	GO:0016052	carbohydrate catabolic process	Biological Process	3	ENSMUSP00000047333,ENSMUSP00000026613,ENSMUSP00000018645
5	GO:0046434	organophosphate catabolic process	Biological Process	6	ENSMUSP00000047333,ENSMUSP00000070868,ENSMUSP00000034713,ENSMUSP00000035179,ENSMUSP00000025050,ENSMUSP00000018645
5	GO:1901136	carbohydrate derivative catabolic process	Biological Process	6	ENSMUSP00000005173,ENSMUSP00000026262,ENSMUSP00000026613,ENSMUSP00000035179,ENSMUSP00000025050,ENSMUSP00000140443
5	GO:1901361	organic cyclic compound catabolic process	Biological Process	11	ENSMUSP00000129789,ENSMUSP00000020801,ENSMUSP00000017384,ENSMUSP00000047333,ENSMUSP00000035179,ENSMUSP00000121736,ENSMUSP00000133302,ENSMUSP00000036245,ENSMUSP00000018645,ENSMUSP00000025050,ENSMUSP00000023832
5	GO:1901616	organic hydroxy compound catabolic process	Biological Process	3	ENSMUSP00000133302,ENSMUSP00000036245,ENSMUSP00000025050
5	GO:0010556	regulation of macromolecule biosynthetic process	Biological Process	90	ENSMUSP00000080974,ENSMUSP00000053916,ENSMUSP00000015981,ENSMUSP00000025263,ENSMUSP00000055714,ENSMUSP00000064680,ENSMUSP00000137253,ENSMUSP00000028881,ENSMUSP00000089948,ENSMUSP00000035644,ENSMUSP00000077971,ENSMUSP00000047333,ENSMUSP00000119057,ENSMUSP00000033570,ENSMUSP00000028071,ENSMUSP00000112675,ENSMUSP00000007799,ENSMUSP00000069850,ENSMUSP00000032194,ENSMUSP00000103056,ENSMUSP00000088291,…
5	GO:0031326	regulation of cellular biosynthetic process	Biological Process	97	ENSMUSP00000080974,ENSMUSP00000053916,ENSMUSP00000015981,ENSMUSP00000025263,ENSMUSP00000055714,ENSMUSP00000064680,ENSMUSP00000137253,ENSMUSP00000028881,ENSMUSP00000089948,ENSMUSP00000035644,ENSMUSP00000077971,ENSMUSP00000047333,ENSMUSP00000119057,ENSMUSP00000033570,ENSMUSP00000028071,ENSMUSP00000112675,ENSMUSP00000007799,ENSMUSP00000069850,ENSMUSP00000032194,ENSMUSP00000103056,ENSMUSP00000088291,…
5	GO:0032965	regulation of collagen biosynthetic process	Biological Process	1	ENSMUSP00000015596
5	GO:0043255	regulation of carbohydrate biosynthetic process	Biological Process	2	ENSMUSP00000112675,ENSMUSP00000126067
5	GO:0046890	regulation of lipid biosynthetic process	Biological Process	10	ENSMUSP00000121309,ENSMUSP00000034713,ENSMUSP00000023832,ENSMUSP00000028882,ENSMUSP00000133302,ENSMUSP00000035065,ENSMUSP00000070868,ENSMUSP00000025263,ENSMUSP00000028881,ENSMUSP00000022099
5	GO:1902930	regulation of alcohol biosynthetic process	Biological Process	4	ENSMUSP00000133302,ENSMUSP00000025263,ENSMUSP00000028881,ENSMUSP00000126067
5	GO:1903426	regulation of reactive oxygen species biosynthetic process	Biological Process	7	ENSMUSP00000023832,ENSMUSP00000007799,ENSMUSP00000083587,ENSMUSP00000080974,ENSMUSP00000035065,ENSMUSP00000025263,ENSMUSP00000028881
5	GO:0010558	negative regulation of macromolecule biosynthetic process	Biological Process	37	ENSMUSP00000080974,ENSMUSP00000053916,ENSMUSP00000015981,ENSMUSP00000025263,ENSMUSP00000055714,ENSMUSP00000064680,ENSMUSP00000137253,ENSMUSP00000028881,ENSMUSP00000089948,ENSMUSP00000035644,ENSMUSP00000077971,ENSMUSP00000047333,ENSMUSP00000119057,ENSMUSP00000033570,ENSMUSP00000028071,ENSMUSP00000112675,ENSMUSP00000007799,ENSMUSP00000069850,ENSMUSP00000032194,ENSMUSP00000103056,ENSMUSP00000088291,…
5	GO:0031327	negative regulation of cellular biosynthetic process	Biological Process	39	ENSMUSP00000080974,ENSMUSP00000053916,ENSMUSP00000015981,ENSMUSP00000025263,ENSMUSP00000055714,ENSMUSP00000064680,ENSMUSP00000137253,ENSMUSP00000028881,ENSMUSP00000089948,ENSMUSP00000035644,ENSMUSP00000077971,ENSMUSP00000047333,ENSMUSP00000119057,ENSMUSP00000033570,ENSMUSP00000028071,ENSMUSP00000112675,ENSMUSP00000007799,ENSMUSP00000069850,ENSMUSP00000032194,ENSMUSP00000103056,ENSMUSP00000088291,…
5	GO:0032966	negative regulation of collagen biosynthetic process	Biological Process	1	ENSMUSP00000015596
5	GO:0051055	negative regulation of lipid biosynthetic process	Biological Process	2	ENSMUSP00000133302,ENSMUSP00000022099
5	GO:1902931	negative regulation of alcohol biosynthetic process	Biological Process	1	ENSMUSP00000133302
5	GO:1903427	negative regulation of reactive oxygen species biosynthetic process	Biological Process	2	ENSMUSP00000023832,ENSMUSP00000007799
5	GO:0010557	positive regulation of macromolecule biosynthetic process	Biological Process	36	ENSMUSP00000079699,ENSMUSP00000129789,ENSMUSP00000086459,ENSMUSP00000001583,ENSMUSP00000122787,ENSMUSP00000054637,ENSMUSP00000025263,ENSMUSP00000028881,ENSMUSP00000104548,ENSMUSP00000004949,ENSMUSP00000028882,ENSMUSP00000095171,ENSMUSP00000086094,ENSMUSP00000025444,ENSMUSP00000058629,ENSMUSP00000069850,ENSMUSP00000151388,ENSMUSP00000109884,ENSMUSP00000129001,ENSMUSP00000022429,ENSMUSP00000062576,…
5	GO:0046889	positive regulation of lipid biosynthetic process	Biological Process	8	ENSMUSP00000034713,ENSMUSP00000023832,ENSMUSP00000028882,ENSMUSP00000035065,ENSMUSP00000070868,ENSMUSP00000025263,ENSMUSP00000028881,ENSMUSP00000133302
5	GO:0031328	positive regulation of cellular biosynthetic process	Biological Process	46	ENSMUSP00000034713,ENSMUSP00000023832,ENSMUSP00000112675,ENSMUSP00000079699,ENSMUSP00000129789,ENSMUSP00000018610,ENSMUSP00000035065,ENSMUSP00000070868,ENSMUSP00000086459,ENSMUSP00000001583,ENSMUSP00000122787,ENSMUSP00000054637,ENSMUSP00000025263,ENSMUSP00000028881,ENSMUSP00000104548,ENSMUSP00000004949,ENSMUSP00000028882,ENSMUSP00000083587,ENSMUSP00000080974,ENSMUSP00000095171,ENSMUSP00000086094,…
5	GO:1902932	positive regulation of alcohol biosynthetic process	Biological Process	3	ENSMUSP00000025263,ENSMUSP00000028881,ENSMUSP00000126067
5	GO:1903428	positive regulation of reactive oxygen species biosynthetic process	Biological Process	5	ENSMUSP00000083587,ENSMUSP00000080974,ENSMUSP00000035065,ENSMUSP00000025263,ENSMUSP00000028881
5	GO:0006703	estrogen biosynthetic process	Biological Process	1	ENSMUSP00000027989
5	GO:0046886	positive regulation of hormone biosynthetic process	Biological Process	2	ENSMUSP00000025263,ENSMUSP00000028881
5	GO:0046885	regulation of hormone biosynthetic process	Biological Process	2	ENSMUSP00000025263,ENSMUSP00000028881
5	GO:0042136	neurotransmitter biosynthetic process	Biological Process	11	ENSMUSP00000018610,ENSMUSP00000099617,ENSMUSP00000023832,ENSMUSP00000007799,ENSMUSP00000083587,ENSMUSP00000080974,ENSMUSP00000035065,ENSMUSP00000025263,ENSMUSP00000028881,ENSMUSP00000087405,ENSMUSP00000043088
5	GO:0008299	isoprenoid biosynthetic process	Biological Process	2	ENSMUSP00000027053,ENSMUSP00000022176
5	GO:0008654	phospholipid biosynthetic process	Biological Process	4	ENSMUSP00000138885,ENSMUSP00000021990,ENSMUSP00000074775,ENSMUSP00000022099
5	GO:0009110	vitamin biosynthetic process	Biological Process	3	ENSMUSP00000023832,ENSMUSP00000025263,ENSMUSP00000028881
5	GO:0016053	organic acid biosynthetic process	Biological Process	20	ENSMUSP00000035065,ENSMUSP00000095171,ENSMUSP00000059977,ENSMUSP00000099916,ENSMUSP00000027053,ENSMUSP00000031103,ENSMUSP00000047333,ENSMUSP00000111204,ENSMUSP00000060462,ENSMUSP00000006557,ENSMUSP00000026220,ENSMUSP00000129704,ENSMUSP00000071130,ENSMUSP00000023832,ENSMUSP00000028881,ENSMUSP00000070868,ENSMUSP00000033800,ENSMUSP00000087405,ENSMUSP00000004968,ENSMUSP00000018645
5	GO:0018130	heterocycle biosynthetic process	Biological Process	99	ENSMUSP00000080974,ENSMUSP00000053916,ENSMUSP00000015981,ENSMUSP00000025263,ENSMUSP00000055714,ENSMUSP00000064680,ENSMUSP00000137253,ENSMUSP00000028881,ENSMUSP00000089948,ENSMUSP00000035644,ENSMUSP00000077971,ENSMUSP00000047333,ENSMUSP00000119057,ENSMUSP00000033570,ENSMUSP00000028071,ENSMUSP00000112675,ENSMUSP00000007799,ENSMUSP00000069850,ENSMUSP00000032194,ENSMUSP00000103056,ENSMUSP00000088291,…
5	GO:0019438	aromatic compound biosynthetic process	Biological Process	98	ENSMUSP00000080974,ENSMUSP00000053916,ENSMUSP00000015981,ENSMUSP00000025263,ENSMUSP00000055714,ENSMUSP00000064680,ENSMUSP00000137253,ENSMUSP00000028881,ENSMUSP00000089948,ENSMUSP00000035644,ENSMUSP00000077971,ENSMUSP00000047333,ENSMUSP00000119057,ENSMUSP00000033570,ENSMUSP00000028071,ENSMUSP00000112675,ENSMUSP00000007799,ENSMUSP00000069850,ENSMUSP00000032194,ENSMUSP00000103056,ENSMUSP00000088291,…
5	GO:0034637	cellular carbohydrate biosynthetic process	Biological Process	1	ENSMUSP00000026617
5	GO:0034645	cellular macromolecule biosynthetic process	Biological Process	124	ENSMUSP00000059192,ENSMUSP00000000505,ENSMUSP00000116252,ENSMUSP00000112600,ENSMUSP00000080974,ENSMUSP00000053916,ENSMUSP00000015981,ENSMUSP00000025263,ENSMUSP00000055714,ENSMUSP00000064680,ENSMUSP00000137253,ENSMUSP00000028881,ENSMUSP00000089948,ENSMUSP00000035644,ENSMUSP00000077971,ENSMUSP00000047333,ENSMUSP00000119057,ENSMUSP00000033570,ENSMUSP00000028071,ENSMUSP00000112675,ENSMUSP00000007799,…
5	GO:0044108	cellular alcohol biosynthetic process	Biological Process	1	ENSMUSP00000021676
5	GO:0044272	sulfur compound biosynthetic process	Biological Process	3	ENSMUSP00000126067,ENSMUSP00000129704,ENSMUSP00000006557
5	GO:0045017	glycerolipid biosynthetic process	Biological Process	7	ENSMUSP00000138885,ENSMUSP00000064423,ENSMUSP00000021990,ENSMUSP00000034713,ENSMUSP00000023832,ENSMUSP00000074775,ENSMUSP00000022099
5	GO:0046460	neutral lipid biosynthetic process	Biological Process	3	ENSMUSP00000064423,ENSMUSP00000034713,ENSMUSP00000023832
5	GO:0046467	membrane lipid biosynthetic process	Biological Process	3	ENSMUSP00000138885,ENSMUSP00000060462,ENSMUSP00000006557
5	GO:0051188	cofactor biosynthetic process	Biological Process	8	ENSMUSP00000047333,ENSMUSP00000087405,ENSMUSP00000096670,ENSMUSP00000126067,ENSMUSP00000064330,ENSMUSP00000023832,ENSMUSP00000006557,ENSMUSP00000018645
5	GO:0034404	nucleobase-containing small molecule biosynthetic process	Biological Process	5	ENSMUSP00000047333,ENSMUSP00000132590,ENSMUSP00000035179,ENSMUSP00000018645,ENSMUSP00000025050
5	GO:0046165	alcohol biosynthetic process	Biological Process	9	ENSMUSP00000133302,ENSMUSP00000022176,ENSMUSP00000027989,ENSMUSP00000021676,ENSMUSP00000087405,ENSMUSP00000069851,ENSMUSP00000025263,ENSMUSP00000028881,ENSMUSP00000126067
5	GO:0046364	monosaccharide biosynthetic process	Biological Process	2	ENSMUSP00000112675,ENSMUSP00000023832
5	GO:0008610	lipid biosynthetic process	Biological Process	26	ENSMUSP00000035065,ENSMUSP00000095171,ENSMUSP00000059977,ENSMUSP00000099916,ENSMUSP00000027053,ENSMUSP00000138885,ENSMUSP00000060462,ENSMUSP00000006557,ENSMUSP00000026220,ENSMUSP00000064423,ENSMUSP00000021990,ENSMUSP00000022176,ENSMUSP00000027989,ENSMUSP00000021676,ENSMUSP00000036245,ENSMUSP00000133302,ENSMUSP00000121309,ENSMUSP00000022099,ENSMUSP00000034713,ENSMUSP00000023832,ENSMUSP00000028882,…
5	GO:0009059	macromolecule biosynthetic process	Biological Process	131	ENSMUSP00000059192,ENSMUSP00000000505,ENSMUSP00000116252,ENSMUSP00000112600,ENSMUSP00000080974,ENSMUSP00000053916,ENSMUSP00000015981,ENSMUSP00000025263,ENSMUSP00000055714,ENSMUSP00000064680,ENSMUSP00000137253,ENSMUSP00000028881,ENSMUSP00000089948,ENSMUSP00000035644,ENSMUSP00000077971,ENSMUSP00000047333,ENSMUSP00000119057,ENSMUSP00000033570,ENSMUSP00000028071,ENSMUSP00000112675,ENSMUSP00000007799,…
5	GO:0016051	carbohydrate biosynthetic process	Biological Process	4	ENSMUSP00000026617,ENSMUSP00000112675,ENSMUSP00000023832,ENSMUSP00000126067
5	GO:0035384	thioester biosynthetic process	Biological Process	2	ENSMUSP00000126067,ENSMUSP00000006557
5	GO:0090407	organophosphate biosynthetic process	Biological Process	18	ENSMUSP00000047333,ENSMUSP00000031542,ENSMUSP00000030583,ENSMUSP00000132590,ENSMUSP00000138885,ENSMUSP00000021990,ENSMUSP00000016396,ENSMUSP00000096670,ENSMUSP00000126067,ENSMUSP00000022099,ENSMUSP00000064330,ENSMUSP00000018610,ENSMUSP00000069851,ENSMUSP00000006557,ENSMUSP00000087405,ENSMUSP00000074775,ENSMUSP00000018645,ENSMUSP00000127716
5	GO:1901137	carbohydrate derivative biosynthetic process	Biological Process	19	ENSMUSP00000026262,ENSMUSP00000031103,ENSMUSP00000047333,ENSMUSP00000030583,ENSMUSP00000132590,ENSMUSP00000034458,ENSMUSP00000154853,ENSMUSP00000036240,ENSMUSP00000033643,ENSMUSP00000004968,ENSMUSP00000138885,ENSMUSP00000016396,ENSMUSP00000126067,ENSMUSP00000064330,ENSMUSP00000028881,ENSMUSP00000006557,ENSMUSP00000022704,ENSMUSP00000018645,ENSMUSP00000127716
5	GO:1901362	organic cyclic compound biosynthetic process	Biological Process	105	ENSMUSP00000080974,ENSMUSP00000053916,ENSMUSP00000015981,ENSMUSP00000025263,ENSMUSP00000055714,ENSMUSP00000064680,ENSMUSP00000137253,ENSMUSP00000028881,ENSMUSP00000089948,ENSMUSP00000035644,ENSMUSP00000077971,ENSMUSP00000047333,ENSMUSP00000119057,ENSMUSP00000033570,ENSMUSP00000028071,ENSMUSP00000112675,ENSMUSP00000007799,ENSMUSP00000069850,ENSMUSP00000032194,ENSMUSP00000103056,ENSMUSP00000088291,…
5	GO:1901570	fatty acid derivative biosynthetic process	Biological Process	7	ENSMUSP00000035065,ENSMUSP00000095171,ENSMUSP00000059977,ENSMUSP00000099916,ENSMUSP00000071130,ENSMUSP00000070868,ENSMUSP00000006557
5	GO:1901617	organic hydroxy compound biosynthetic process	Biological Process	9	ENSMUSP00000133302,ENSMUSP00000022176,ENSMUSP00000027989,ENSMUSP00000021676,ENSMUSP00000087405,ENSMUSP00000069851,ENSMUSP00000126067,ENSMUSP00000025263,ENSMUSP00000028881
5	GO:0006809	nitric oxide biosynthetic process	Biological Process	9	ENSMUSP00000023832,ENSMUSP00000007799,ENSMUSP00000083587,ENSMUSP00000080974,ENSMUSP00000035065,ENSMUSP00000025263,ENSMUSP00000028881,ENSMUSP00000018610,ENSMUSP00000099617
5	GO:0002091	negative regulation of receptor internalization	Biological Process	1	ENSMUSP00000056715
5	GO:0010629	negative regulation of gene expression	Biological Process	49	ENSMUSP00000080974,ENSMUSP00000053916,ENSMUSP00000015981,ENSMUSP00000025263,ENSMUSP00000055714,ENSMUSP00000064680,ENSMUSP00000137253,ENSMUSP00000028881,ENSMUSP00000089948,ENSMUSP00000035644,ENSMUSP00000077971,ENSMUSP00000047333,ENSMUSP00000119057,ENSMUSP00000033570,ENSMUSP00000028071,ENSMUSP00000112675,ENSMUSP00000007799,ENSMUSP00000069850,ENSMUSP00000032194,ENSMUSP00000103056,ENSMUSP00000088291,…
5	GO:0051053	negative regulation of DNA metabolic process	Biological Process	3	ENSMUSP00000133279,ENSMUSP00000023832,ENSMUSP00000064536
5	GO:0051253	negative regulation of RNA metabolic process	Biological Process	36	ENSMUSP00000080974,ENSMUSP00000053916,ENSMUSP00000015981,ENSMUSP00000025263,ENSMUSP00000055714,ENSMUSP00000064680,ENSMUSP00000137253,ENSMUSP00000028881,ENSMUSP00000089948,ENSMUSP00000035644,ENSMUSP00000077971,ENSMUSP00000047333,ENSMUSP00000119057,ENSMUSP00000033570,ENSMUSP00000028071,ENSMUSP00000112675,ENSMUSP00000007799,ENSMUSP00000069850,ENSMUSP00000032194,ENSMUSP00000103056,ENSMUSP00000088291,…
5	GO:0010563	negative regulation of phosphorus metabolic process	Biological Process	25	ENSMUSP00000007799,ENSMUSP00000037206,ENSMUSP00000127716,ENSMUSP00000126067,ENSMUSP00000023832,ENSMUSP00000027367,ENSMUSP00000065719,ENSMUSP00000015596,ENSMUSP00000025263,ENSMUSP00000047202,ENSMUSP00000020964,ENSMUSP00000033570,ENSMUSP00000037657,ENSMUSP00000112675,ENSMUSP00000104548,ENSMUSP00000133302,ENSMUSP00000028881,ENSMUSP00000022176,ENSMUSP00000019997,ENSMUSP00000018645,ENSMUSP00000109877,…
5	GO:2000378	negative regulation of reactive oxygen species metabolic process	Biological Process	2	ENSMUSP00000023832,ENSMUSP00000007799
5	GO:0032269	negative regulation of cellular protein metabolic process	Biological Process	40	ENSMUSP00000007799,ENSMUSP00000037206,ENSMUSP00000127716,ENSMUSP00000126067,ENSMUSP00000023832,ENSMUSP00000027367,ENSMUSP00000065719,ENSMUSP00000015596,ENSMUSP00000035061,ENSMUSP00000032228,ENSMUSP00000022576,ENSMUSP00000046530,ENSMUSP00000000769,ENSMUSP00000023583,ENSMUSP00000028233,ENSMUSP00000019997,ENSMUSP00000082548,ENSMUSP00000086094,ENSMUSP00000065423,ENSMUSP00000047202,ENSMUSP00000020964,…
5	GO:0090209	negative regulation of triglyceride metabolic process	Biological Process	1	ENSMUSP00000133302
5	GO:1903019	negative regulation of glycoprotein metabolic process	Biological Process	1	ENSMUSP00000022704
5	GO:0045939	negative regulation of steroid metabolic process	Biological Process	1	ENSMUSP00000133302
5	GO:1903726	negative regulation of phospholipid metabolic process	Biological Process	1	ENSMUSP00000022099
5	GO:0032769	negative regulation of monooxygenase activity	Biological Process	2	ENSMUSP00000007799,ENSMUSP00000126067
5	GO:0045980	negative regulation of nucleotide metabolic process	Biological Process	2	ENSMUSP00000022419,ENSMUSP00000127716
5	GO:0090206	negative regulation of cholesterol metabolic process	Biological Process	1	ENSMUSP00000133302
5	GO:0010628	positive regulation of gene expression	Biological Process	48	ENSMUSP00000120466,ENSMUSP00000087119,ENSMUSP00000079699,ENSMUSP00000129789,ENSMUSP00000001583,ENSMUSP00000051492,ENSMUSP00000095171,ENSMUSP00000025263,ENSMUSP00000086094,ENSMUSP00000028881,ENSMUSP00000025444,ENSMUSP00000058629,ENSMUSP00000069850,ENSMUSP00000104548,ENSMUSP00000151388,ENSMUSP00000109884,ENSMUSP00000129001,ENSMUSP00000022429,ENSMUSP00000062576,ENSMUSP00000006625,ENSMUSP00000115044,…
5	GO:0051054	positive regulation of DNA metabolic process	Biological Process	2	ENSMUSP00000086459,ENSMUSP00000035179
5	GO:0051254	positive regulation of RNA metabolic process	Biological Process	31	ENSMUSP00000001583,ENSMUSP00000051492,ENSMUSP00000095171,ENSMUSP00000025263,ENSMUSP00000086094,ENSMUSP00000028881,ENSMUSP00000025444,ENSMUSP00000058629,ENSMUSP00000069850,ENSMUSP00000104548,ENSMUSP00000151388,ENSMUSP00000109884,ENSMUSP00000129001,ENSMUSP00000022429,ENSMUSP00000062576,ENSMUSP00000006625,ENSMUSP00000115044,ENSMUSP00000064680,ENSMUSP00000127716,ENSMUSP00000028882,ENSMUSP00000148145,…
5	GO:2000646	positive regulation of receptor catabolic process	Biological Process	1	ENSMUSP00000133302
5	GO:0010562	positive regulation of phosphorus metabolic process	Biological Process	42	ENSMUSP00000025263,ENSMUSP00000040307,ENSMUSP00000086459,ENSMUSP00000095171,ENSMUSP00000028881,ENSMUSP00000071715,ENSMUSP00000031840,ENSMUSP00000025523,ENSMUSP00000015981,ENSMUSP00000122787,ENSMUSP00000027639,ENSMUSP00000058629,ENSMUSP00000029711,ENSMUSP00000015596,ENSMUSP00000080717,ENSMUSP00000004949,ENSMUSP00000039604,ENSMUSP00000053394,ENSMUSP00000022830,ENSMUSP00000023832,ENSMUSP00000018610,…
5	GO:2000379	positive regulation of reactive oxygen species metabolic process	Biological Process	11	ENSMUSP00000031327,ENSMUSP00000083587,ENSMUSP00000080974,ENSMUSP00000035065,ENSMUSP00000025263,ENSMUSP00000028881,ENSMUSP00000023832,ENSMUSP00000126067,ENSMUSP00000127716,ENSMUSP00000022830,ENSMUSP00000015596
5	GO:0010676	positive regulation of cellular carbohydrate metabolic process	Biological Process	3	ENSMUSP00000023832,ENSMUSP00000112675,ENSMUSP00000126067
5	GO:0010873	positive regulation of cholesterol esterification	Biological Process	1	ENSMUSP00000133302
5	GO:0032270	positive regulation of cellular protein metabolic process	Biological Process	58	ENSMUSP00000025263,ENSMUSP00000040307,ENSMUSP00000086459,ENSMUSP00000095171,ENSMUSP00000028881,ENSMUSP00000071715,ENSMUSP00000031840,ENSMUSP00000025523,ENSMUSP00000015981,ENSMUSP00000122787,ENSMUSP00000027639,ENSMUSP00000058629,ENSMUSP00000029711,ENSMUSP00000015596,ENSMUSP00000027015,ENSMUSP00000126067,ENSMUSP00000039604,ENSMUSP00000080717,ENSMUSP00000004949,ENSMUSP00000120466,ENSMUSP00000053394,…
5	GO:0045923	positive regulation of fatty acid metabolic process	Biological Process	3	ENSMUSP00000035065,ENSMUSP00000070868,ENSMUSP00000023832
5	GO:0051194	positive regulation of cofactor metabolic process	Biological Process	1	ENSMUSP00000126067
5	GO:0090208	positive regulation of triglyceride metabolic process	Biological Process	4	ENSMUSP00000034713,ENSMUSP00000023832,ENSMUSP00000000049,ENSMUSP00000080974
5	GO:1901857	positive regulation of cellular respiration	Biological Process	1	ENSMUSP00000041380
5	GO:0045940	positive regulation of steroid metabolic process	Biological Process	4	ENSMUSP00000133302,ENSMUSP00000028882,ENSMUSP00000025263,ENSMUSP00000028881
5	GO:0032770	positive regulation of monooxygenase activity	Biological Process	4	ENSMUSP00000133302,ENSMUSP00000087405,ENSMUSP00000025263,ENSMUSP00000028881
5	GO:1901671	positive regulation of superoxide dismutase activity	Biological Process	2	ENSMUSP00000025263,ENSMUSP00000023832
5	GO:0010907	positive regulation of glucose metabolic process	Biological Process	2	ENSMUSP00000112675,ENSMUSP00000023832
5	GO:0045981	positive regulation of nucleotide metabolic process	Biological Process	2	ENSMUSP00000018610,ENSMUSP00000127716
5	GO:0046136	positive regulation of vitamin metabolic process	Biological Process	2	ENSMUSP00000025263,ENSMUSP00000028881
5	GO:0002090	regulation of receptor internalization	Biological Process	2	ENSMUSP00000056715,ENSMUSP00000033560
5	GO:0010565	regulation of cellular ketone metabolic process	Biological Process	5	ENSMUSP00000126067,ENSMUSP00000007799,ENSMUSP00000035065,ENSMUSP00000070868,ENSMUSP00000023832
5	GO:0010675	regulation of cellular carbohydrate metabolic process	Biological Process	3	ENSMUSP00000023832,ENSMUSP00000112675,ENSMUSP00000126067
5	GO:0010872	regulation of cholesterol esterification	Biological Process	1	ENSMUSP00000133302
5	GO:0032268	regulation of cellular protein metabolic process	Biological Process	95	ENSMUSP00000050374,ENSMUSP00000033282,ENSMUSP00000025263,ENSMUSP00000040307,ENSMUSP00000086459,ENSMUSP00000095171,ENSMUSP00000028881,ENSMUSP00000071715,ENSMUSP00000007799,ENSMUSP00000054499,ENSMUSP00000069851,ENSMUSP00000037206,ENSMUSP00000127716,ENSMUSP00000126067,ENSMUSP00000023832,ENSMUSP00000027367,ENSMUSP00000065719,ENSMUSP00000015596,ENSMUSP00000031840,ENSMUSP00000025523,ENSMUSP00000015981,…
5	GO:0042762	regulation of sulfur metabolic process	Biological Process	1	ENSMUSP00000126067
5	GO:0043467	regulation of generation of precursor metabolites and energy	Biological Process	4	ENSMUSP00000047333,ENSMUSP00000018645,ENSMUSP00000022419,ENSMUSP00000041380
5	GO:0051174	regulation of phosphorus metabolic process	Biological Process	67	ENSMUSP00000050374,ENSMUSP00000033282,ENSMUSP00000025263,ENSMUSP00000040307,ENSMUSP00000086459,ENSMUSP00000095171,ENSMUSP00000028881,ENSMUSP00000071715,ENSMUSP00000007799,ENSMUSP00000054499,ENSMUSP00000069851,ENSMUSP00000037206,ENSMUSP00000127716,ENSMUSP00000126067,ENSMUSP00000023832,ENSMUSP00000027367,ENSMUSP00000065719,ENSMUSP00000015596,ENSMUSP00000031840,ENSMUSP00000025523,ENSMUSP00000015981,…
5	GO:0051193	regulation of cofactor metabolic process	Biological Process	3	ENSMUSP00000047333,ENSMUSP00000126067,ENSMUSP00000018645
5	GO:2000377	regulation of reactive oxygen species metabolic process	Biological Process	14	ENSMUSP00000080974,ENSMUSP00000127716,ENSMUSP00000022830,ENSMUSP00000015596,ENSMUSP00000031327,ENSMUSP00000023832,ENSMUSP00000007799,ENSMUSP00000083587,ENSMUSP00000035065,ENSMUSP00000025263,ENSMUSP00000028881,ENSMUSP00000126067,ENSMUSP00000087405,ENSMUSP00000022429
5	GO:0090207	regulation of triglyceride metabolic process	Biological Process	5	ENSMUSP00000034713,ENSMUSP00000023832,ENSMUSP00000000049,ENSMUSP00000080974,ENSMUSP00000133302
5	GO:1903018	regulation of glycoprotein metabolic process	Biological Process	1	ENSMUSP00000022704
5	GO:0032768	regulation of monooxygenase activity	Biological Process	6	ENSMUSP00000126067,ENSMUSP00000028881,ENSMUSP00000133302,ENSMUSP00000087405,ENSMUSP00000007799,ENSMUSP00000025263
5	GO:1901668	regulation of superoxide dismutase activity	Biological Process	2	ENSMUSP00000025263,ENSMUSP00000023832
5	GO:0010468	regulation of gene expression	Biological Process	106	ENSMUSP00000080974,ENSMUSP00000053916,ENSMUSP00000015981,ENSMUSP00000025263,ENSMUSP00000055714,ENSMUSP00000064680,ENSMUSP00000137253,ENSMUSP00000028881,ENSMUSP00000089948,ENSMUSP00000035644,ENSMUSP00000077971,ENSMUSP00000047333,ENSMUSP00000119057,ENSMUSP00000033570,ENSMUSP00000028071,ENSMUSP00000112675,ENSMUSP00000007799,ENSMUSP00000069850,ENSMUSP00000032194,ENSMUSP00000103056,ENSMUSP00000088291,…
5	GO:0032069	regulation of nuclease activity	Biological Process	1	ENSMUSP00000031542
5	GO:0051052	regulation of DNA metabolic process	Biological Process	10	ENSMUSP00000062576,ENSMUSP00000150618,ENSMUSP00000086459,ENSMUSP00000089948,ENSMUSP00000124258,ENSMUSP00000133279,ENSMUSP00000023832,ENSMUSP00000064536,ENSMUSP00000021807,ENSMUSP00000035179
5	GO:0051252	regulation of RNA metabolic process	Biological Process	84	ENSMUSP00000080974,ENSMUSP00000053916,ENSMUSP00000015981,ENSMUSP00000025263,ENSMUSP00000055714,ENSMUSP00000064680,ENSMUSP00000137253,ENSMUSP00000028881,ENSMUSP00000089948,ENSMUSP00000035644,ENSMUSP00000077971,ENSMUSP00000047333,ENSMUSP00000119057,ENSMUSP00000033570,ENSMUSP00000028071,ENSMUSP00000112675,ENSMUSP00000007799,ENSMUSP00000069850,ENSMUSP00000032194,ENSMUSP00000103056,ENSMUSP00000088291,…
5	GO:2000644	regulation of receptor catabolic process	Biological Process	1	ENSMUSP00000133302
5	GO:0006140	regulation of nucleotide metabolic process	Biological Process	6	ENSMUSP00000047333,ENSMUSP00000126067,ENSMUSP00000018610,ENSMUSP00000018645,ENSMUSP00000022419,ENSMUSP00000127716
5	GO:0010906	regulation of glucose metabolic process	Biological Process	2	ENSMUSP00000023832,ENSMUSP00000112675
5	GO:0030656	regulation of vitamin metabolic process	Biological Process	2	ENSMUSP00000025263,ENSMUSP00000028881
5	GO:0090181	regulation of cholesterol metabolic process	Biological Process	2	ENSMUSP00000133302,ENSMUSP00000034713
5	GO:0006109	regulation of carbohydrate metabolic process	Biological Process	5	ENSMUSP00000047333,ENSMUSP00000023832,ENSMUSP00000112675,ENSMUSP00000126067,ENSMUSP00000018645
5	GO:0019216	regulation of lipid metabolic process	Biological Process	15	ENSMUSP00000121309,ENSMUSP00000126067,ENSMUSP00000034713,ENSMUSP00000023832,ENSMUSP00000133302,ENSMUSP00000028882,ENSMUSP00000000049,ENSMUSP00000007799,ENSMUSP00000035065,ENSMUSP00000070868,ENSMUSP00000028881,ENSMUSP00000025263,ENSMUSP00000080974,ENSMUSP00000022099,ENSMUSP00000069965
5	GO:0042069	regulation of catecholamine metabolic process	Biological Process	1	ENSMUSP00000126067
5	GO:0001510	RNA methylation	Biological Process	1	ENSMUSP00000022203
5	GO:0006306	DNA methylation	Biological Process	3	ENSMUSP00000089948,ENSMUSP00000119057,ENSMUSP00000028071
5	GO:0006479	protein methylation	Biological Process	4	ENSMUSP00000119057,ENSMUSP00000024887,ENSMUSP00000133279,ENSMUSP00000025444
5	GO:0008210	estrogen metabolic process	Biological Process	1	ENSMUSP00000027989
5	GO:0042572	retinol metabolic process	Biological Process	1	ENSMUSP00000027053
5	GO:0042573	retinoic acid metabolic process	Biological Process	1	ENSMUSP00000027053
5	GO:0000096	sulfur amino acid metabolic process	Biological Process	1	ENSMUSP00000129704
5	GO:0006749	glutathione metabolic process	Biological Process	1	ENSMUSP00000099916
5	GO:0016226	iron-sulfur cluster assembly	Biological Process	1	ENSMUSP00000003759
5	GO:0046498	S-adenosylhomocysteine metabolic process	Biological Process	1	ENSMUSP00000129704
5	GO:0042574	retinal metabolic process	Biological Process	1	ENSMUSP00000027053
5	GO:0043436	oxoacid metabolic process	Biological Process	38	ENSMUSP00000035065,ENSMUSP00000095171,ENSMUSP00000059977,ENSMUSP00000099916,ENSMUSP00000080974,ENSMUSP00000025500,ENSMUSP00000027053,ENSMUSP00000154853,ENSMUSP00000031103,ENSMUSP00000000175,ENSMUSP00000104957,ENSMUSP00000047333,ENSMUSP00000102393,ENSMUSP00000111204,ENSMUSP00000018610,ENSMUSP00000121736,ENSMUSP00000126067,ENSMUSP00000060462,ENSMUSP00000034026,ENSMUSP00000006557,ENSMUSP00000002737,…
5	GO:0006119	oxidative phosphorylation	Biological Process	7	ENSMUSP00000000175,ENSMUSP00000054856,ENSMUSP00000115419,ENSMUSP00000080993,ENSMUSP00000126067,ENSMUSP00000066303,ENSMUSP00000022419
5	GO:0006757	ATP generation from ADP	Biological Process	2	ENSMUSP00000047333,ENSMUSP00000018645
5	GO:0006446	regulation of translational initiation	Biological Process	2	ENSMUSP00000025263,ENSMUSP00000133175
5	GO:0045948	positive regulation of translational initiation	Biological Process	1	ENSMUSP00000025263
5	GO:0006658	phosphatidylserine metabolic process	Biological Process	1	ENSMUSP00000021990
5	GO:0006760	folic acid-containing compound metabolic process	Biological Process	1	ENSMUSP00000087405
5	GO:0046946	hydroxylysine metabolic process	Biological Process	1	ENSMUSP00000004968
5	GO:0018958	phenol-containing compound metabolic process	Biological Process	2	ENSMUSP00000126067,ENSMUSP00000087405
5	GO:0006796	phosphate-containing compound metabolic process	Biological Process	110	ENSMUSP00000050374,ENSMUSP00000033282,ENSMUSP00000025263,ENSMUSP00000028881,ENSMUSP00000039600,ENSMUSP00000069851,ENSMUSP00000001008,ENSMUSP00000086459,ENSMUSP00000051492,ENSMUSP00000040307,ENSMUSP00000095171,ENSMUSP00000071715,ENSMUSP00000007799,ENSMUSP00000054499,ENSMUSP00000037206,ENSMUSP00000127716,ENSMUSP00000126067,ENSMUSP00000023832,ENSMUSP00000027367,ENSMUSP00000065719,ENSMUSP00000015596,…
5	GO:0046398	UDP-glucuronate metabolic process	Biological Process	1	ENSMUSP00000031103
5	GO:0006801	superoxide metabolic process	Biological Process	6	ENSMUSP00000031327,ENSMUSP00000025263,ENSMUSP00000023832,ENSMUSP00000080974,ENSMUSP00000087405,ENSMUSP00000018610
5	GO:0042743	hydrogen peroxide metabolic process	Biological Process	1	ENSMUSP00000126067
5	GO:0046033	AMP metabolic process	Biological Process	1	ENSMUSP00000030583
5	GO:0016999	antibiotic metabolic process	Biological Process	3	ENSMUSP00000154853,ENSMUSP00000000175,ENSMUSP00000126067
5	GO:0046034	ATP metabolic process	Biological Process	13	ENSMUSP00000047333,ENSMUSP00000080993,ENSMUSP00000000175,ENSMUSP00000054856,ENSMUSP00000115419,ENSMUSP00000016396,ENSMUSP00000126067,ENSMUSP00000066303,ENSMUSP00000018645,ENSMUSP00000022419,ENSMUSP00000127716,ENSMUSP00000030583,ENSMUSP00000026972
5	GO:0046146	tetrahydrobiopterin metabolic process	Biological Process	1	ENSMUSP00000087405
5	GO:0070982	L-asparagine metabolic process	Biological Process	1	ENSMUSP00000111204
5	GO:0071265	L-methionine biosynthetic process	Biological Process	1	ENSMUSP00000129704
5	GO:1901661	quinone metabolic process	Biological Process	1	ENSMUSP00000022176
5	GO:0043102	amino acid salvage	Biological Process	1	ENSMUSP00000129704
5	GO:0008204	ergosterol metabolic process	Biological Process	1	ENSMUSP00000021676
5	GO:0006490	oligosaccharide-lipid intermediate biosynthetic process	Biological Process	1	ENSMUSP00000033643
5	GO:0006631	fatty acid metabolic process	Biological Process	21	ENSMUSP00000035065,ENSMUSP00000095171,ENSMUSP00000059977,ENSMUSP00000099916,ENSMUSP00000080974,ENSMUSP00000025500,ENSMUSP00000060462,ENSMUSP00000006557,ENSMUSP00000026220,ENSMUSP00000034026,ENSMUSP00000126067,ENSMUSP00000007799,ENSMUSP00000043088,ENSMUSP00000070868,ENSMUSP00000071130,ENSMUSP00000041175,ENSMUSP00000026211,ENSMUSP00000019942,ENSMUSP00000033800,ENSMUSP00000023832,ENSMUSP00000002737
5	GO:0006638	neutral lipid metabolic process	Biological Process	9	ENSMUSP00000133302,ENSMUSP00000080974,ENSMUSP00000007799,ENSMUSP00000000049,ENSMUSP00000064423,ENSMUSP00000034713,ENSMUSP00000023832,ENSMUSP00000043088,ENSMUSP00000126067
5	GO:0006643	membrane lipid metabolic process	Biological Process	5	ENSMUSP00000138885,ENSMUSP00000064423,ENSMUSP00000026262,ENSMUSP00000060462,ENSMUSP00000006557
5	GO:0006644	phospholipid metabolic process	Biological Process	12	ENSMUSP00000138885,ENSMUSP00000021990,ENSMUSP00000022099,ENSMUSP00000070868,ENSMUSP00000034713,ENSMUSP00000024706,ENSMUSP00000074775,ENSMUSP00000025523,ENSMUSP00000111457,ENSMUSP00000126067,ENSMUSP00000065719,ENSMUSP00000064423
5	GO:0006720	isoprenoid metabolic process	Biological Process	2	ENSMUSP00000027053,ENSMUSP00000022176
5	GO:0030258	lipid modification	Biological Process	7	ENSMUSP00000031741,ENSMUSP00000133302,ENSMUSP00000080974,ENSMUSP00000024706,ENSMUSP00000065719,ENSMUSP00000064423,ENSMUSP00000111457
5	GO:0046485	ether lipid metabolic process	Biological Process	1	ENSMUSP00000010451
5	GO:0046486	glycerolipid metabolic process	Biological Process	16	ENSMUSP00000138885,ENSMUSP00000133302,ENSMUSP00000080974,ENSMUSP00000007799,ENSMUSP00000000049,ENSMUSP00000064423,ENSMUSP00000021990,ENSMUSP00000034713,ENSMUSP00000023832,ENSMUSP00000022099,ENSMUSP00000043088,ENSMUSP00000024706,ENSMUSP00000074775,ENSMUSP00000070868,ENSMUSP00000025523,ENSMUSP00000111457
5	GO:0097384	cellular lipid biosynthetic process	Biological Process	1	ENSMUSP00000021676
5	GO:0006259	DNA metabolic process	Biological Process	26	ENSMUSP00000059192,ENSMUSP00000000505,ENSMUSP00000116252,ENSMUSP00000112600,ENSMUSP00000020931,ENSMUSP00000018985,ENSMUSP00000062576,ENSMUSP00000156132,ENSMUSP00000033282,ENSMUSP00000138108,ENSMUSP00000092673,ENSMUSP00000051492,ENSMUSP00000019882,ENSMUSP00000119057,ENSMUSP00000028071,ENSMUSP00000089948,ENSMUSP00000150618,ENSMUSP00000086459,ENSMUSP00000041380,ENSMUSP00000124258,ENSMUSP00000133279,…
5	GO:0009100	glycoprotein metabolic process	Biological Process	8	ENSMUSP00000034458,ENSMUSP00000154853,ENSMUSP00000036240,ENSMUSP00000033643,ENSMUSP00000004968,ENSMUSP00000005173,ENSMUSP00000022704,ENSMUSP00000140443
5	GO:0043112	receptor metabolic process	Biological Process	8	ENSMUSP00000021963,ENSMUSP00000126067,ENSMUSP00000056715,ENSMUSP00000080974,ENSMUSP00000007799,ENSMUSP00000025263,ENSMUSP00000133302,ENSMUSP00000033560
5	GO:0044264	cellular polysaccharide metabolic process	Biological Process	3	ENSMUSP00000083474,ENSMUSP00000050788,ENSMUSP00000026617
5	GO:0044267	cellular protein metabolic process	Biological Process	169	ENSMUSP00000050374,ENSMUSP00000033282,ENSMUSP00000025263,ENSMUSP00000028881,ENSMUSP00000039600,ENSMUSP00000069851,ENSMUSP00000001008,ENSMUSP00000086459,ENSMUSP00000051492,ENSMUSP00000040307,ENSMUSP00000095171,ENSMUSP00000071715,ENSMUSP00000007799,ENSMUSP00000062277,ENSMUSP00000033264,ENSMUSP00000094225,ENSMUSP00000004949,ENSMUSP00000082548,ENSMUSP00000037206,ENSMUSP00000109257,ENSMUSP00000022419,…
5	GO:0019389	glucuronoside metabolic process	Biological Process	1	ENSMUSP00000026613
5	GO:0006560	proline metabolic process	Biological Process	1	ENSMUSP00000121736
5	GO:0006103	2-oxoglutarate metabolic process	Biological Process	1	ENSMUSP00000104957
5	GO:0006732	coenzyme metabolic process	Biological Process	10	ENSMUSP00000047333,ENSMUSP00000087405,ENSMUSP00000022176,ENSMUSP00000096670,ENSMUSP00000126067,ENSMUSP00000064330,ENSMUSP00000129704,ENSMUSP00000023832,ENSMUSP00000006557,ENSMUSP00000018645
5	GO:0051189	prosthetic group metabolic process	Biological Process	1	ENSMUSP00000096670
5	GO:0005976	polysaccharide metabolic process	Biological Process	3	ENSMUSP00000083474,ENSMUSP00000050788,ENSMUSP00000026617
5	GO:0034654	nucleobase-containing compound biosynthetic process	Biological Process	97	ENSMUSP00000080974,ENSMUSP00000053916,ENSMUSP00000015981,ENSMUSP00000025263,ENSMUSP00000055714,ENSMUSP00000064680,ENSMUSP00000137253,ENSMUSP00000028881,ENSMUSP00000089948,ENSMUSP00000035644,ENSMUSP00000077971,ENSMUSP00000047333,ENSMUSP00000119057,ENSMUSP00000033570,ENSMUSP00000028071,ENSMUSP00000112675,ENSMUSP00000007799,ENSMUSP00000069850,ENSMUSP00000032194,ENSMUSP00000103056,ENSMUSP00000088291,…
5	GO:0034655	nucleobase-containing compound catabolic process	Biological Process	8	ENSMUSP00000129789,ENSMUSP00000020801,ENSMUSP00000017384,ENSMUSP00000047333,ENSMUSP00000035179,ENSMUSP00000018645,ENSMUSP00000025050,ENSMUSP00000023832
5	GO:0090304	nucleic acid metabolic process	Biological Process	128	ENSMUSP00000059192,ENSMUSP00000000505,ENSMUSP00000116252,ENSMUSP00000112600,ENSMUSP00000080974,ENSMUSP00000053916,ENSMUSP00000015981,ENSMUSP00000025263,ENSMUSP00000055714,ENSMUSP00000064680,ENSMUSP00000137253,ENSMUSP00000028881,ENSMUSP00000089948,ENSMUSP00000035644,ENSMUSP00000077971,ENSMUSP00000047333,ENSMUSP00000119057,ENSMUSP00000033570,ENSMUSP00000028071,ENSMUSP00000112675,ENSMUSP00000007799,…
5	GO:0008652	cellular amino acid biosynthetic process	Biological Process	3	ENSMUSP00000111204,ENSMUSP00000129704,ENSMUSP00000004968
5	GO:0009063	cellular amino acid catabolic process	Biological Process	2	ENSMUSP00000018610,ENSMUSP00000121736
5	GO:0043038	amino acid activation	Biological Process	1	ENSMUSP00000102393
5	GO:1901605	alpha-amino acid metabolic process	Biological Process	5	ENSMUSP00000018610,ENSMUSP00000111204,ENSMUSP00000121736,ENSMUSP00000129704,ENSMUSP00000004968
5	GO:0008202	steroid metabolic process	Biological Process	11	ENSMUSP00000022176,ENSMUSP00000027989,ENSMUSP00000021676,ENSMUSP00000036245,ENSMUSP00000133302,ENSMUSP00000121309,ENSMUSP00000034713,ENSMUSP00000028882,ENSMUSP00000025263,ENSMUSP00000028881,ENSMUSP00000031741
5	GO:1903509	liposaccharide metabolic process	Biological Process	2	ENSMUSP00000138885,ENSMUSP00000026262
5	GO:0006508	proteolysis	Biological Process	62	ENSMUSP00000082548,ENSMUSP00000028844,ENSMUSP00000146675,ENSMUSP00000027015,ENSMUSP00000062637,ENSMUSP00000062277,ENSMUSP00000032198,ENSMUSP00000133175,ENSMUSP00000047202,ENSMUSP00000094225,ENSMUSP00000061305,ENSMUSP00000025263,ENSMUSP00000126067,ENSMUSP00000039604,ENSMUSP00000019470,ENSMUSP00000035061,ENSMUSP00000032228,ENSMUSP00000120466,ENSMUSP00000022576,ENSMUSP00000046530,ENSMUSP00000000769,…
5	GO:0006777	Mo-molybdopterin cofactor biosynthetic process	Biological Process	1	ENSMUSP00000096670
5	GO:0030163	protein catabolic process	Biological Process	32	ENSMUSP00000082548,ENSMUSP00000062277,ENSMUSP00000032198,ENSMUSP00000133175,ENSMUSP00000047202,ENSMUSP00000094225,ENSMUSP00000061305,ENSMUSP00000019470,ENSMUSP00000005173,ENSMUSP00000031072,ENSMUSP00000057573,ENSMUSP00000008748,ENSMUSP00000086094,ENSMUSP00000065423,ENSMUSP00000115044,ENSMUSP00000133302,ENSMUSP00000034713,ENSMUSP00000018610,ENSMUSP00000055714,ENSMUSP00000025263,ENSMUSP00000019997,…
5	GO:0036211	protein modification process	Biological Process	124	ENSMUSP00000050374,ENSMUSP00000033282,ENSMUSP00000025263,ENSMUSP00000028881,ENSMUSP00000039600,ENSMUSP00000069851,ENSMUSP00000001008,ENSMUSP00000086459,ENSMUSP00000051492,ENSMUSP00000040307,ENSMUSP00000095171,ENSMUSP00000071715,ENSMUSP00000007799,ENSMUSP00000062277,ENSMUSP00000033264,ENSMUSP00000094225,ENSMUSP00000004949,ENSMUSP00000037206,ENSMUSP00000109257,ENSMUSP00000022419,ENSMUSP00000020964,…
5	GO:0042107	cytokine metabolic process	Biological Process	8	ENSMUSP00000122787,ENSMUSP00000054637,ENSMUSP00000025263,ENSMUSP00000028881,ENSMUSP00000104548,ENSMUSP00000004949,ENSMUSP00000028882,ENSMUSP00000069850
5	GO:0042157	lipoprotein metabolic process	Biological Process	7	ENSMUSP00000026173,ENSMUSP00000045201,ENSMUSP00000147061,ENSMUSP00000138885,ENSMUSP00000062983,ENSMUSP00000133302,ENSMUSP00000034713
5	GO:0042982	amyloid precursor protein metabolic process	Biological Process	4	ENSMUSP00000146675,ENSMUSP00000022704,ENSMUSP00000133302,ENSMUSP00000037206
5	GO:0051604	protein maturation	Biological Process	11	ENSMUSP00000027015,ENSMUSP00000146675,ENSMUSP00000062637,ENSMUSP00000120466,ENSMUSP00000022576,ENSMUSP00000087119,ENSMUSP00000104485,ENSMUSP00000041380,ENSMUSP00000141648,ENSMUSP00000000049,ENSMUSP00000003759
5	GO:1990000	amyloid fibril formation	Biological Process	5	ENSMUSP00000133302,ENSMUSP00000034713,ENSMUSP00000080974,ENSMUSP00000037206,ENSMUSP00000022830
5	GO:0019318	hexose metabolic process	Biological Process	3	ENSMUSP00000025263,ENSMUSP00000023832,ENSMUSP00000112675
5	GO:0019852	L-ascorbic acid metabolic process	Biological Process	1	ENSMUSP00000023832
5	GO:0019751	polyol metabolic process	Biological Process	5	ENSMUSP00000064423,ENSMUSP00000087405,ENSMUSP00000069851,ENSMUSP00000126067,ENSMUSP00000025050
5	GO:0034308	primary alcohol metabolic process	Biological Process	1	ENSMUSP00000027053
5	GO:1902652	secondary alcohol metabolic process	Biological Process	6	ENSMUSP00000133302,ENSMUSP00000022176,ENSMUSP00000027989,ENSMUSP00000021676,ENSMUSP00000036245,ENSMUSP00000034713
5	GO:0006767	water-soluble vitamin metabolic process	Biological Process	1	ENSMUSP00000023832
5	GO:0006775	fat-soluble vitamin metabolic process	Biological Process	2	ENSMUSP00000025263,ENSMUSP00000028881
5	GO:0006662	glycerol ether metabolic process	Biological Process	1	ENSMUSP00000010451
5	GO:0006753	nucleoside phosphate metabolic process	Biological Process	21	ENSMUSP00000047333,ENSMUSP00000080993,ENSMUSP00000000175,ENSMUSP00000054856,ENSMUSP00000115419,ENSMUSP00000031542,ENSMUSP00000132590,ENSMUSP00000030583,ENSMUSP00000016396,ENSMUSP00000126067,ENSMUSP00000035179,ENSMUSP00000022176,ENSMUSP00000064330,ENSMUSP00000018610,ENSMUSP00000006557,ENSMUSP00000066303,ENSMUSP00000026972,ENSMUSP00000018645,ENSMUSP00000022419,ENSMUSP00000025050,ENSMUSP00000127716
5	GO:0009225	nucleotide-sugar metabolic process	Biological Process	1	ENSMUSP00000031103
5	GO:0006486	protein glycosylation	Biological Process	5	ENSMUSP00000154853,ENSMUSP00000033643,ENSMUSP00000034458,ENSMUSP00000004968,ENSMUSP00000036240
5	GO:0019692	deoxyribose phosphate metabolic process	Biological Process	2	ENSMUSP00000035179,ENSMUSP00000030583
5	GO:0019693	ribose phosphate metabolic process	Biological Process	19	ENSMUSP00000047333,ENSMUSP00000080993,ENSMUSP00000000175,ENSMUSP00000054856,ENSMUSP00000115419,ENSMUSP00000030583,ENSMUSP00000132590,ENSMUSP00000016396,ENSMUSP00000126067,ENSMUSP00000022176,ENSMUSP00000064330,ENSMUSP00000006557,ENSMUSP00000066303,ENSMUSP00000026972,ENSMUSP00000035179,ENSMUSP00000018645,ENSMUSP00000022419,ENSMUSP00000025050,ENSMUSP00000127716
5	GO:0043647	inositol phosphate metabolic process	Biological Process	3	ENSMUSP00000069851,ENSMUSP00000126067,ENSMUSP00000025050
5	GO:0006637	acyl-CoA metabolic process	Biological Process	2	ENSMUSP00000126067,ENSMUSP00000006557
5	GO:0010467	gene expression	Biological Process	147	ENSMUSP00000080974,ENSMUSP00000053916,ENSMUSP00000015981,ENSMUSP00000025263,ENSMUSP00000055714,ENSMUSP00000064680,ENSMUSP00000137253,ENSMUSP00000028881,ENSMUSP00000089948,ENSMUSP00000035644,ENSMUSP00000077971,ENSMUSP00000047333,ENSMUSP00000119057,ENSMUSP00000033570,ENSMUSP00000028071,ENSMUSP00000112675,ENSMUSP00000007799,ENSMUSP00000069850,ENSMUSP00000032194,ENSMUSP00000103056,ENSMUSP00000088291,…
5	GO:0043412	macromolecule modification	Biological Process	127	ENSMUSP00000050374,ENSMUSP00000033282,ENSMUSP00000022203,ENSMUSP00000025263,ENSMUSP00000028881,ENSMUSP00000039600,ENSMUSP00000069851,ENSMUSP00000001008,ENSMUSP00000086459,ENSMUSP00000051492,ENSMUSP00000040307,ENSMUSP00000095171,ENSMUSP00000071715,ENSMUSP00000007799,ENSMUSP00000062277,ENSMUSP00000033264,ENSMUSP00000094225,ENSMUSP00000004949,ENSMUSP00000037206,ENSMUSP00000109257,ENSMUSP00000022419,…
5	GO:0033353	S-adenosylmethionine cycle	Biological Process	1	ENSMUSP00000129704
5	GO:0006040	amino sugar metabolic process	Biological Process	1	ENSMUSP00000154853
5	GO:0009262	deoxyribonucleotide metabolic process	Biological Process	2	ENSMUSP00000035179,ENSMUSP00000030583
5	GO:1901657	glycosyl compound metabolic process	Biological Process	3	ENSMUSP00000132590,ENSMUSP00000129704,ENSMUSP00000026613
5	GO:0006690	icosanoid metabolic process	Biological Process	10	ENSMUSP00000035065,ENSMUSP00000095171,ENSMUSP00000059977,ENSMUSP00000099916,ENSMUSP00000071130,ENSMUSP00000034026,ENSMUSP00000043088,ENSMUSP00000070868,ENSMUSP00000041175,ENSMUSP00000026211
5	GO:0035337	fatty-acyl-CoA metabolic process	Biological Process	1	ENSMUSP00000006557
5	GO:0016125	sterol metabolic process	Biological Process	6	ENSMUSP00000133302,ENSMUSP00000022176,ENSMUSP00000027989,ENSMUSP00000021676,ENSMUSP00000036245,ENSMUSP00000034713
5	GO:0016128	phytosteroid metabolic process	Biological Process	1	ENSMUSP00000021676
5	GO:0042359	vitamin D metabolic process	Biological Process	2	ENSMUSP00000025263,ENSMUSP00000028881
5	GO:0001914	regulation of T cell mediated cytotoxicity	Biological Process	4	ENSMUSP00000099534,ENSMUSP00000131297,ENSMUSP00000022830,ENSMUSP00000015596
5	GO:0042269	regulation of natural killer cell mediated cytotoxicity	Biological Process	1	ENSMUSP00000032260
5	GO:0070948	regulation of neutrophil mediated cytotoxicity	Biological Process	1	ENSMUSP00000031327
5	GO:0045953	negative regulation of natural killer cell mediated cytotoxicity	Biological Process	1	ENSMUSP00000032260
5	GO:0001916	positive regulation of T cell mediated cytotoxicity	Biological Process	2	ENSMUSP00000099534,ENSMUSP00000131297
5	GO:0070960	positive regulation of neutrophil mediated cytotoxicity	Biological Process	1	ENSMUSP00000031327
5	GO:0070943	neutrophil mediated killing of symbiont cell	Biological Process	1	ENSMUSP00000031327
5	GO:0070949	regulation of neutrophil mediated killing of symbiont cell	Biological Process	1	ENSMUSP00000031327
5	GO:0070961	positive regulation of neutrophil mediated killing of symbiont cell	Biological Process	1	ENSMUSP00000031327
5	GO:0051873	killing by host of symbiont cells	Biological Process	1	ENSMUSP00000031327
5	GO:0001781	neutrophil apoptotic process	Biological Process	1	ENSMUSP00000069851
5	GO:0001782	B cell homeostasis	Biological Process	2	ENSMUSP00000019997,ENSMUSP00000095171
5	GO:0043029	T cell homeostasis	Biological Process	1	ENSMUSP00000022830
5	GO:0002631	regulation of granuloma formation	Biological Process	1	ENSMUSP00000019997
5	GO:0002632	negative regulation of granuloma formation	Biological Process	1	ENSMUSP00000019997
5	GO:0002444	myeloid leukocyte mediated immunity	Biological Process	4	ENSMUSP00000074471,ENSMUSP00000089051,ENSMUSP00000001008,ENSMUSP00000031327
5	GO:0002449	lymphocyte mediated immunity	Biological Process	17	ENSMUSP00000122787,ENSMUSP00000022830,ENSMUSP00000015596,ENSMUSP00000099534,ENSMUSP00000131297,ENSMUSP00000002855,ENSMUSP00000083587,ENSMUSP00000044050,ENSMUSP00000033427,ENSMUSP00000040307,ENSMUSP00000004949,ENSMUSP00000025263,ENSMUSP00000028233,ENSMUSP00000095171,ENSMUSP00000032260,ENSMUSP00000020970,ENSMUSP00000028881
5	GO:0002703	regulation of leukocyte mediated immunity	Biological Process	15	ENSMUSP00000122787,ENSMUSP00000022830,ENSMUSP00000015596,ENSMUSP00000099534,ENSMUSP00000131297,ENSMUSP00000044050,ENSMUSP00000033427,ENSMUSP00000040307,ENSMUSP00000004949,ENSMUSP00000025263,ENSMUSP00000032260,ENSMUSP00000089051,ENSMUSP00000031327,ENSMUSP00000020970,ENSMUSP00000028881
5	GO:0002704	negative regulation of leukocyte mediated immunity	Biological Process	2	ENSMUSP00000122787,ENSMUSP00000032260
5	GO:0002705	positive regulation of leukocyte mediated immunity	Biological Process	10	ENSMUSP00000099534,ENSMUSP00000131297,ENSMUSP00000033427,ENSMUSP00000040307,ENSMUSP00000004949,ENSMUSP00000025263,ENSMUSP00000089051,ENSMUSP00000031327,ENSMUSP00000020970,ENSMUSP00000028881
5	GO:0043300	regulation of leukocyte degranulation	Biological Process	1	ENSMUSP00000089051
5	GO:0045622	regulation of T-helper cell differentiation	Biological Process	4	ENSMUSP00000054637,ENSMUSP00000104548,ENSMUSP00000103056,ENSMUSP00000110102
5	GO:0045623	negative regulation of T-helper cell differentiation	Biological Process	2	ENSMUSP00000104548,ENSMUSP00000103056
5	GO:0033006	regulation of mast cell activation involved in immune response	Biological Process	1	ENSMUSP00000089051
5	GO:0043302	positive regulation of leukocyte degranulation	Biological Process	1	ENSMUSP00000089051
5	GO:0045624	positive regulation of T-helper cell differentiation	Biological Process	2	ENSMUSP00000104548,ENSMUSP00000110102
5	GO:0001867	complement activation, lectin pathway	Biological Process	1	ENSMUSP00000023790
5	GO:0006957	complement activation, alternative pathway	Biological Process	1	ENSMUSP00000028233
5	GO:0006958	complement activation, classical pathway	Biological Process	1	ENSMUSP00000028233
5	GO:0043303	mast cell degranulation	Biological Process	1	ENSMUSP00000089051
5	GO:0043308	eosinophil degranulation	Biological Process	1	ENSMUSP00000001008
5	GO:0002758	innate immune response-activating signal transduction	Biological Process	9	ENSMUSP00000080974,ENSMUSP00000104548,ENSMUSP00000025263,ENSMUSP00000019997,ENSMUSP00000007799,ENSMUSP00000056669,ENSMUSP00000142428,ENSMUSP00000020970,ENSMUSP00000028259
5	GO:0002429	immune response-activating cell surface receptor signaling pathway	Biological Process	4	ENSMUSP00000110102,ENSMUSP00000004910,ENSMUSP00000004949,ENSMUSP00000112675
5	GO:0030218	erythrocyte differentiation	Biological Process	6	ENSMUSP00000082777,ENSMUSP00000047333,ENSMUSP00000099534,ENSMUSP00000082548,ENSMUSP00000090897,ENSMUSP00000112675
5	GO:0002369	T cell cytokine production	Biological Process	7	ENSMUSP00000099534,ENSMUSP00000033427,ENSMUSP00000040307,ENSMUSP00000004949,ENSMUSP00000020970,ENSMUSP00000028881,ENSMUSP00000002855
5	GO:0002374	cytokine secretion involved in immune response	Biological Process	1	ENSMUSP00000025263
5	GO:0002718	regulation of cytokine production involved in immune response	Biological Process	9	ENSMUSP00000099534,ENSMUSP00000033427,ENSMUSP00000040307,ENSMUSP00000004949,ENSMUSP00000025263,ENSMUSP00000080974,ENSMUSP00000095171,ENSMUSP00000020970,ENSMUSP00000028881
5	GO:0002719	negative regulation of cytokine production involved in immune response	Biological Process	1	ENSMUSP00000025263
5	GO:0002720	positive regulation of cytokine production involved in immune response	Biological Process	8	ENSMUSP00000099534,ENSMUSP00000033427,ENSMUSP00000040307,ENSMUSP00000004949,ENSMUSP00000080974,ENSMUSP00000095171,ENSMUSP00000020970,ENSMUSP00000028881
5	GO:0061082	myeloid leukocyte cytokine production	Biological Process	2	ENSMUSP00000080974,ENSMUSP00000095171
5	GO:0002378	immunoglobulin biosynthetic process	Biological Process	1	ENSMUSP00000034458
5	GO:0002637	regulation of immunoglobulin production	Biological Process	4	ENSMUSP00000033427,ENSMUSP00000025263,ENSMUSP00000004949,ENSMUSP00000019997
5	GO:0002639	positive regulation of immunoglobulin production	Biological Process	1	ENSMUSP00000033427
5	GO:0048305	immunoglobulin secretion	Biological Process	2	ENSMUSP00000025263,ENSMUSP00000004949
5	GO:0002465	peripheral tolerance induction	Biological Process	1	ENSMUSP00000016640
5	GO:0002652	regulation of tolerance induction dependent upon immune response	Biological Process	1	ENSMUSP00000016640
5	GO:0002654	positive regulation of tolerance induction dependent upon immune response	Biological Process	1	ENSMUSP00000016640
5	GO:0048535	lymph node development	Biological Process	1	ENSMUSP00000022830
5	GO:0030097	hemopoiesis	Biological Process	41	ENSMUSP00000103056,ENSMUSP00000067002,ENSMUSP00000148145,ENSMUSP00000032239,ENSMUSP00000122787,ENSMUSP00000019997,ENSMUSP00000121848,ENSMUSP00000033749,ENSMUSP00000047333,ENSMUSP00000112675,ENSMUSP00000002855,ENSMUSP00000069851,ENSMUSP00000082777,ENSMUSP00000025523,ENSMUSP00000025263,ENSMUSP00000024791,ENSMUSP00000064680,ENSMUSP00000004949,ENSMUSP00000104548,ENSMUSP00000099534,ENSMUSP00000022830,…
5	GO:0048536	spleen development	Biological Process	2	ENSMUSP00000082777,ENSMUSP00000022830
5	GO:0048538	thymus development	Biological Process	1	ENSMUSP00000022830
5	GO:0002580	regulation of antigen processing and presentation of peptide or polysaccharide antigen via MHC class II	Biological Process	1	ENSMUSP00000024791
5	GO:0002583	regulation of antigen processing and presentation of peptide antigen	Biological Process	1	ENSMUSP00000024791
5	GO:0002604	regulation of dendritic cell antigen processing and presentation	Biological Process	1	ENSMUSP00000095171
5	GO:0002688	regulation of leukocyte chemotaxis	Biological Process	9	ENSMUSP00000039600,ENSMUSP00000028233,ENSMUSP00000037028,ENSMUSP00000142428,ENSMUSP00000095171,ENSMUSP00000028881,ENSMUSP00000024706,ENSMUSP00000021970,ENSMUSP00000001008
5	GO:0002691	regulation of cellular extravasation	Biological Process	2	ENSMUSP00000083587,ENSMUSP00000022830
5	GO:0071675	regulation of mononuclear cell migration	Biological Process	3	ENSMUSP00000039600,ENSMUSP00000024706,ENSMUSP00000142428
5	GO:1902622	regulation of neutrophil migration	Biological Process	4	ENSMUSP00000095171,ENSMUSP00000028881,ENSMUSP00000037028,ENSMUSP00000028882
5	GO:1905521	regulation of macrophage migration	Biological Process	3	ENSMUSP00000039600,ENSMUSP00000028233,ENSMUSP00000087119
5	GO:2000401	regulation of lymphocyte migration	Biological Process	5	ENSMUSP00000039600,ENSMUSP00000122787,ENSMUSP00000022830,ENSMUSP00000021970,ENSMUSP00000001008
5	GO:0033003	regulation of mast cell activation	Biological Process	1	ENSMUSP00000089051
5	GO:0043030	regulation of macrophage activation	Biological Process	3	ENSMUSP00000034713,ENSMUSP00000015596,ENSMUSP00000126067
5	GO:0051249	regulation of lymphocyte activation	Biological Process	26	ENSMUSP00000095171,ENSMUSP00000033427,ENSMUSP00000028071,ENSMUSP00000016640,ENSMUSP00000122787,ENSMUSP00000007799,ENSMUSP00000044050,ENSMUSP00000104548,ENSMUSP00000028881,ENSMUSP00000039600,ENSMUSP00000004949,ENSMUSP00000015596,ENSMUSP00000054637,ENSMUSP00000031840,ENSMUSP00000017153,ENSMUSP00000069850,ENSMUSP00000103056,ENSMUSP00000015540,ENSMUSP00000110232,ENSMUSP00000087119,ENSMUSP00000022830,…
5	GO:0002819	regulation of adaptive immune response	Biological Process	20	ENSMUSP00000122787,ENSMUSP00000022830,ENSMUSP00000015596,ENSMUSP00000099534,ENSMUSP00000131297,ENSMUSP00000019997,ENSMUSP00000044050,ENSMUSP00000033427,ENSMUSP00000040307,ENSMUSP00000004949,ENSMUSP00000109877,ENSMUSP00000095171,ENSMUSP00000016640,ENSMUSP00000025263,ENSMUSP00000054637,ENSMUSP00000104548,ENSMUSP00000103056,ENSMUSP00000110102,ENSMUSP00000020970,ENSMUSP00000028881
5	GO:0002828	regulation of type 2 immune response	Biological Process	3	ENSMUSP00000095171,ENSMUSP00000104548,ENSMUSP00000020970
5	GO:0002837	regulation of immune response to tumor cell	Biological Process	1	ENSMUSP00000016640
5	GO:0002861	regulation of inflammatory response to antigenic stimulus	Biological Process	2	ENSMUSP00000122787,ENSMUSP00000025263
5	GO:0002920	regulation of humoral immune response	Biological Process	2	ENSMUSP00000022722,ENSMUSP00000025263
5	GO:0045088	regulation of innate immune response	Biological Process	16	ENSMUSP00000006625,ENSMUSP00000080974,ENSMUSP00000104548,ENSMUSP00000025263,ENSMUSP00000019997,ENSMUSP00000007799,ENSMUSP00000056669,ENSMUSP00000142428,ENSMUSP00000020970,ENSMUSP00000028259,ENSMUSP00000032260,ENSMUSP00000095171,ENSMUSP00000087587,ENSMUSP00000039604,ENSMUSP00000037657,ENSMUSP00000112675
5	GO:0050854	regulation of antigen receptor-mediated signaling pathway	Biological Process	1	ENSMUSP00000112675
5	GO:0045637	regulation of myeloid cell differentiation	Biological Process	14	ENSMUSP00000110232,ENSMUSP00000069851,ENSMUSP00000099534,ENSMUSP00000082548,ENSMUSP00000112675,ENSMUSP00000095171,ENSMUSP00000025263,ENSMUSP00000047333,ENSMUSP00000069850,ENSMUSP00000032260,ENSMUSP00000001008,ENSMUSP00000025523,ENSMUSP00000039600,ENSMUSP00000004949
5	GO:1902033	regulation of hematopoietic stem cell proliferation	Biological Process	1	ENSMUSP00000031327
5	GO:1902105	regulation of leukocyte differentiation	Biological Process	22	ENSMUSP00000104548,ENSMUSP00000028881,ENSMUSP00000028071,ENSMUSP00000103056,ENSMUSP00000033427,ENSMUSP00000015540,ENSMUSP00000110232,ENSMUSP00000087119,ENSMUSP00000095171,ENSMUSP00000054637,ENSMUSP00000112675,ENSMUSP00000025263,ENSMUSP00000047333,ENSMUSP00000069850,ENSMUSP00000032260,ENSMUSP00000001008,ENSMUSP00000025523,ENSMUSP00000039600,ENSMUSP00000004949,ENSMUSP00000069851,ENSMUSP00000110102,…
5	GO:0002689	negative regulation of leukocyte chemotaxis	Biological Process	1	ENSMUSP00000028233
5	GO:1905522	negative regulation of macrophage migration	Biological Process	1	ENSMUSP00000028233
5	GO:0043031	negative regulation of macrophage activation	Biological Process	1	ENSMUSP00000034713
5	GO:0051250	negative regulation of lymphocyte activation	Biological Process	12	ENSMUSP00000031840,ENSMUSP00000016640,ENSMUSP00000122787,ENSMUSP00000017153,ENSMUSP00000069850,ENSMUSP00000103056,ENSMUSP00000110232,ENSMUSP00000095171,ENSMUSP00000104548,ENSMUSP00000019997,ENSMUSP00000109877,ENSMUSP00000112675
5	GO:0034140	negative regulation of toll-like receptor 3 signaling pathway	Biological Process	1	ENSMUSP00000019997
5	GO:0034148	negative regulation of toll-like receptor 5 signaling pathway	Biological Process	1	ENSMUSP00000019997
5	GO:0002820	negative regulation of adaptive immune response	Biological Process	3	ENSMUSP00000122787,ENSMUSP00000103056,ENSMUSP00000109877
5	GO:0002829	negative regulation of type 2 immune response	Biological Process	1	ENSMUSP00000104548
5	GO:0002862	negative regulation of inflammatory response to antigenic stimulus	Biological Process	1	ENSMUSP00000122787
5	GO:0045824	negative regulation of innate immune response	Biological Process	5	ENSMUSP00000032260,ENSMUSP00000037657,ENSMUSP00000112675,ENSMUSP00000039604,ENSMUSP00000019997
5	GO:0050860	negative regulation of T cell receptor signaling pathway	Biological Process	1	ENSMUSP00000112675
5	GO:0070429	negative regulation of nucleotide-binding oligomerization domain containing 1 signaling pathway	Biological Process	1	ENSMUSP00000019997
5	GO:0070433	negative regulation of nucleotide-binding oligomerization domain containing 2 signaling pathway	Biological Process	1	ENSMUSP00000019997
5	GO:0045638	negative regulation of myeloid cell differentiation	Biological Process	5	ENSMUSP00000112675,ENSMUSP00000032260,ENSMUSP00000001008,ENSMUSP00000110232,ENSMUSP00000069851
5	GO:1902106	negative regulation of leukocyte differentiation	Biological Process	7	ENSMUSP00000103056,ENSMUSP00000110232,ENSMUSP00000095171,ENSMUSP00000104548,ENSMUSP00000112675,ENSMUSP00000032260,ENSMUSP00000001008
5	GO:0002582	positive regulation of antigen processing and presentation of peptide or polysaccharide antigen via MHC class II	Biological Process	1	ENSMUSP00000024791
5	GO:0002585	positive regulation of antigen processing and presentation of peptide antigen	Biological Process	1	ENSMUSP00000024791
5	GO:0002606	positive regulation of dendritic cell antigen processing and presentation	Biological Process	1	ENSMUSP00000095171
5	GO:0002690	positive regulation of leukocyte chemotaxis	Biological Process	8	ENSMUSP00000039600,ENSMUSP00000142428,ENSMUSP00000095171,ENSMUSP00000028881,ENSMUSP00000037028,ENSMUSP00000024706,ENSMUSP00000021970,ENSMUSP00000001008
5	GO:0002693	positive regulation of cellular extravasation	Biological Process	1	ENSMUSP00000083587
5	GO:0071677	positive regulation of mononuclear cell migration	Biological Process	3	ENSMUSP00000024706,ENSMUSP00000039600,ENSMUSP00000142428
5	GO:1902624	positive regulation of neutrophil migration	Biological Process	4	ENSMUSP00000095171,ENSMUSP00000028881,ENSMUSP00000037028,ENSMUSP00000028882
5	GO:1905523	positive regulation of macrophage migration	Biological Process	2	ENSMUSP00000039600,ENSMUSP00000087119
5	GO:2000403	positive regulation of lymphocyte migration	Biological Process	4	ENSMUSP00000039600,ENSMUSP00000122787,ENSMUSP00000021970,ENSMUSP00000001008
5	GO:0033005	positive regulation of mast cell activation	Biological Process	1	ENSMUSP00000089051
5	GO:0043032	positive regulation of macrophage activation	Biological Process	1	ENSMUSP00000015596
5	GO:0051251	positive regulation of lymphocyte activation	Biological Process	17	ENSMUSP00000095171,ENSMUSP00000033427,ENSMUSP00000028071,ENSMUSP00000016640,ENSMUSP00000122787,ENSMUSP00000007799,ENSMUSP00000044050,ENSMUSP00000104548,ENSMUSP00000028881,ENSMUSP00000039600,ENSMUSP00000004949,ENSMUSP00000015596,ENSMUSP00000015540,ENSMUSP00000103056,ENSMUSP00000087119,ENSMUSP00000069851,ENSMUSP00000110102
5	GO:0002821	positive regulation of adaptive immune response	Biological Process	12	ENSMUSP00000099534,ENSMUSP00000131297,ENSMUSP00000033427,ENSMUSP00000040307,ENSMUSP00000004949,ENSMUSP00000016640,ENSMUSP00000025263,ENSMUSP00000104548,ENSMUSP00000110102,ENSMUSP00000020970,ENSMUSP00000028881,ENSMUSP00000095171
5	GO:0002830	positive regulation of type 2 immune response	Biological Process	2	ENSMUSP00000020970,ENSMUSP00000095171
5	GO:0002839	positive regulation of immune response to tumor cell	Biological Process	1	ENSMUSP00000016640
5	GO:0002863	positive regulation of inflammatory response to antigenic stimulus	Biological Process	1	ENSMUSP00000025263
5	GO:0002922	positive regulation of humoral immune response	Biological Process	2	ENSMUSP00000022722,ENSMUSP00000025263
5	GO:0033008	positive regulation of mast cell activation involved in immune response	Biological Process	1	ENSMUSP00000089051
5	GO:0045089	positive regulation of innate immune response	Biological Process	12	ENSMUSP00000006625,ENSMUSP00000080974,ENSMUSP00000104548,ENSMUSP00000025263,ENSMUSP00000019997,ENSMUSP00000007799,ENSMUSP00000056669,ENSMUSP00000142428,ENSMUSP00000020970,ENSMUSP00000028259,ENSMUSP00000095171,ENSMUSP00000087587
5	GO:0045639	positive regulation of myeloid cell differentiation	Biological Process	7	ENSMUSP00000082548,ENSMUSP00000095171,ENSMUSP00000025523,ENSMUSP00000025263,ENSMUSP00000039600,ENSMUSP00000004949,ENSMUSP00000001008
5	GO:1902035	positive regulation of hematopoietic stem cell proliferation	Biological Process	1	ENSMUSP00000031327
5	GO:1902107	positive regulation of leukocyte differentiation	Biological Process	16	ENSMUSP00000104548,ENSMUSP00000028881,ENSMUSP00000028071,ENSMUSP00000033427,ENSMUSP00000015540,ENSMUSP00000103056,ENSMUSP00000087119,ENSMUSP00000095171,ENSMUSP00000025523,ENSMUSP00000025263,ENSMUSP00000039600,ENSMUSP00000004949,ENSMUSP00000001008,ENSMUSP00000069851,ENSMUSP00000110102,ENSMUSP00000015596
5	GO:0002460	adaptive immune response based on somatic recombination of immune receptors built from immunoglobulin superfamily domains	Biological Process	22	ENSMUSP00000122787,ENSMUSP00000022830,ENSMUSP00000015596,ENSMUSP00000099534,ENSMUSP00000131297,ENSMUSP00000002855,ENSMUSP00000083587,ENSMUSP00000019997,ENSMUSP00000044050,ENSMUSP00000033427,ENSMUSP00000040307,ENSMUSP00000004949,ENSMUSP00000016640,ENSMUSP00000025263,ENSMUSP00000028233,ENSMUSP00000095171,ENSMUSP00000054637,ENSMUSP00000104548,ENSMUSP00000103056,ENSMUSP00000110102,ENSMUSP00000020970,…
5	GO:0002385	mucosal immune response	Biological Process	1	ENSMUSP00000088291
5	GO:0002413	tolerance induction to tumor cell	Biological Process	1	ENSMUSP00000016640
5	GO:0002438	acute inflammatory response to antigenic stimulus	Biological Process	2	ENSMUSP00000122787,ENSMUSP00000083587
5	GO:0002439	chronic inflammatory response to antigenic stimulus	Biological Process	2	ENSMUSP00000025263,ENSMUSP00000028881
5	GO:0002455	humoral immune response mediated by circulating immunoglobulin	Biological Process	2	ENSMUSP00000025263,ENSMUSP00000028233
5	GO:0035745	T-helper 2 cell cytokine production	Biological Process	1	ENSMUSP00000020970
5	GO:0045064	T-helper 2 cell differentiation	Biological Process	1	ENSMUSP00000104548
5	GO:0002228	natural killer cell mediated immunity	Biological Process	1	ENSMUSP00000032260
5	GO:0034340	response to type I interferon	Biological Process	4	ENSMUSP00000023693,ENSMUSP00000112675,ENSMUSP00000039604,ENSMUSP00000082548
5	GO:0034341	response to interferon-gamma	Biological Process	18	ENSMUSP00000104548,ENSMUSP00000037657,ENSMUSP00000112675,ENSMUSP00000071486,ENSMUSP00000132435,ENSMUSP00000027015,ENSMUSP00000087587,ENSMUSP00000018610,ENSMUSP00000089051,ENSMUSP00000033900,ENSMUSP00000039600,ENSMUSP00000145451,ENSMUSP00000019266,ENSMUSP00000001008,ENSMUSP00000019064,ENSMUSP00000033264,ENSMUSP00000126067,ENSMUSP00000087405
5	GO:0002428	antigen processing and presentation of peptide antigen via MHC class Ib	Biological Process	2	ENSMUSP00000131297,ENSMUSP00000099534
5	GO:0002495	antigen processing and presentation of peptide antigen via MHC class II	Biological Process	3	ENSMUSP00000024791,ENSMUSP00000095171,ENSMUSP00000004949
5	GO:0002483	antigen processing and presentation of endogenous peptide antigen	Biological Process	2	ENSMUSP00000131297,ENSMUSP00000099534
5	GO:0002478	antigen processing and presentation of exogenous peptide antigen	Biological Process	3	ENSMUSP00000099534,ENSMUSP00000095171,ENSMUSP00000004949
5	GO:0002474	antigen processing and presentation of peptide antigen via MHC class I	Biological Process	1	ENSMUSP00000099534
5	GO:0043369	CD4-positive or CD8-positive, alpha-beta T cell lineage commitment	Biological Process	1	ENSMUSP00000122787
5	GO:0045059	positive thymic T cell selection	Biological Process	3	ENSMUSP00000112675,ENSMUSP00000095171,ENSMUSP00000069851
5	GO:0045060	negative thymic T cell selection	Biological Process	2	ENSMUSP00000095171,ENSMUSP00000122787
5	GO:0001774	microglial cell activation	Biological Process	4	ENSMUSP00000034713,ENSMUSP00000015596,ENSMUSP00000027015,ENSMUSP00000126067
5	GO:0001773	myeloid dendritic cell activation	Biological Process	1	ENSMUSP00000004949
5	GO:0002275	myeloid cell activation involved in immune response	Biological Process	2	ENSMUSP00000089051,ENSMUSP00000001008
5	GO:0036230	granulocyte activation	Biological Process	2	ENSMUSP00000039600,ENSMUSP00000001008
5	GO:0042116	macrophage activation	Biological Process	4	ENSMUSP00000027015,ENSMUSP00000126067,ENSMUSP00000034713,ENSMUSP00000015596
5	GO:0045576	mast cell activation	Biological Process	1	ENSMUSP00000089051
5	GO:0002285	lymphocyte activation involved in immune response	Biological Process	9	ENSMUSP00000083587,ENSMUSP00000032239,ENSMUSP00000122787,ENSMUSP00000019997,ENSMUSP00000022124,ENSMUSP00000054637,ENSMUSP00000104548,ENSMUSP00000103056,ENSMUSP00000110102
5	GO:0030098	lymphocyte differentiation	Biological Process	22	ENSMUSP00000103056,ENSMUSP00000032239,ENSMUSP00000122787,ENSMUSP00000019997,ENSMUSP00000047333,ENSMUSP00000112675,ENSMUSP00000002855,ENSMUSP00000069851,ENSMUSP00000104548,ENSMUSP00000099534,ENSMUSP00000022830,ENSMUSP00000109884,ENSMUSP00000028881,ENSMUSP00000028071,ENSMUSP00000020970,ENSMUSP00000033427,ENSMUSP00000015540,ENSMUSP00000095171,ENSMUSP00000110232,ENSMUSP00000087119,ENSMUSP00000054637,…
5	GO:0030101	natural killer cell activation	Biological Process	1	ENSMUSP00000104548
5	GO:0042110	T cell activation	Biological Process	30	ENSMUSP00000103056,ENSMUSP00000083587,ENSMUSP00000032239,ENSMUSP00000122787,ENSMUSP00000002855,ENSMUSP00000112675,ENSMUSP00000069851,ENSMUSP00000016640,ENSMUSP00000007799,ENSMUSP00000044050,ENSMUSP00000099534,ENSMUSP00000022830,ENSMUSP00000109884,ENSMUSP00000028881,ENSMUSP00000028071,ENSMUSP00000020970,ENSMUSP00000037206,ENSMUSP00000020964,ENSMUSP00000039600,ENSMUSP00000033427,ENSMUSP00000004949,…
5	GO:0042113	B cell activation	Biological Process	12	ENSMUSP00000019997,ENSMUSP00000022124,ENSMUSP00000047333,ENSMUSP00000112675,ENSMUSP00000095171,ENSMUSP00000033427,ENSMUSP00000028071,ENSMUSP00000110232,ENSMUSP00000087119,ENSMUSP00000109877,ENSMUSP00000145462,ENSMUSP00000033570
5	GO:0046651	lymphocyte proliferation	Biological Process	19	ENSMUSP00000022124,ENSMUSP00000095171,ENSMUSP00000033427,ENSMUSP00000028071,ENSMUSP00000028881,ENSMUSP00000037206,ENSMUSP00000020964,ENSMUSP00000016640,ENSMUSP00000122787,ENSMUSP00000039600,ENSMUSP00000004949,ENSMUSP00000015596,ENSMUSP00000054637,ENSMUSP00000031840,ENSMUSP00000017153,ENSMUSP00000069850,ENSMUSP00000022830,ENSMUSP00000103056,ENSMUSP00000104548
5	GO:0002548	monocyte chemotaxis	Biological Process	5	ENSMUSP00000024706,ENSMUSP00000039600,ENSMUSP00000142428,ENSMUSP00000019266,ENSMUSP00000001008
5	GO:0002551	mast cell chemotaxis	Biological Process	1	ENSMUSP00000039600
5	GO:0048246	macrophage chemotaxis	Biological Process	3	ENSMUSP00000039600,ENSMUSP00000028233,ENSMUSP00000001008
5	GO:0048247	lymphocyte chemotaxis	Biological Process	6	ENSMUSP00000019064,ENSMUSP00000001008,ENSMUSP00000039600,ENSMUSP00000036245,ENSMUSP00000021970,ENSMUSP00000019266
5	GO:0071621	granulocyte chemotaxis	Biological Process	9	ENSMUSP00000039600,ENSMUSP00000028881,ENSMUSP00000031327,ENSMUSP00000074885,ENSMUSP00000019266,ENSMUSP00000001008,ENSMUSP00000037028,ENSMUSP00000142428,ENSMUSP00000095171
5	GO:0050901	leukocyte tethering or rolling	Biological Process	2	ENSMUSP00000025263,ENSMUSP00000122787
5	GO:0072683	T cell extravasation	Biological Process	3	ENSMUSP00000039600,ENSMUSP00000022830,ENSMUSP00000083587
5	GO:0035685	helper T cell diapedesis	Biological Process	1	ENSMUSP00000039600
5	GO:0072678	T cell migration	Biological Process	6	ENSMUSP00000019064,ENSMUSP00000001008,ENSMUSP00000039600,ENSMUSP00000083587,ENSMUSP00000122787,ENSMUSP00000022830
5	GO:0097530	granulocyte migration	Biological Process	11	ENSMUSP00000039600,ENSMUSP00000028881,ENSMUSP00000031327,ENSMUSP00000074885,ENSMUSP00000019266,ENSMUSP00000001008,ENSMUSP00000037028,ENSMUSP00000142428,ENSMUSP00000095171,ENSMUSP00000028882,ENSMUSP00000074471
5	GO:0097531	mast cell migration	Biological Process	1	ENSMUSP00000039600
5	GO:1905517	macrophage migration	Biological Process	4	ENSMUSP00000039600,ENSMUSP00000028233,ENSMUSP00000001008,ENSMUSP00000087119
5	GO:0061387	regulation of extent of cell growth	Biological Process	6	ENSMUSP00000052465,ENSMUSP00000099907,ENSMUSP00000054499,ENSMUSP00000133302,ENSMUSP00000004910,ENSMUSP00000130684
5	GO:1903859	regulation of dendrite extension	Biological Process	1	ENSMUSP00000039604
5	GO:0045773	positive regulation of axon extension	Biological Process	4	ENSMUSP00000054499,ENSMUSP00000133302,ENSMUSP00000004910,ENSMUSP00000130684
5	GO:1903861	positive regulation of dendrite extension	Biological Process	1	ENSMUSP00000039604
5	GO:0030517	negative regulation of axon extension	Biological Process	1	ENSMUSP00000099907
5	GO:1990138	neuron projection extension	Biological Process	8	ENSMUSP00000052465,ENSMUSP00000099907,ENSMUSP00000054499,ENSMUSP00000133302,ENSMUSP00000004910,ENSMUSP00000130684,ENSMUSP00000109794,ENSMUSP00000039604
5	GO:0044130	negative regulation of growth of symbiont in host	Biological Process	3	ENSMUSP00000080974,ENSMUSP00000015981,ENSMUSP00000025263
5	GO:0044139	modulation of growth of symbiont on or near host	Biological Process	1	ENSMUSP00000023788
5	GO:0030516	regulation of axon extension	Biological Process	6	ENSMUSP00000099907,ENSMUSP00000054499,ENSMUSP00000133302,ENSMUSP00000004910,ENSMUSP00000130684,ENSMUSP00000052465
5	GO:0044117	growth of symbiont in host	Biological Process	3	ENSMUSP00000080974,ENSMUSP00000015981,ENSMUSP00000025263
5	GO:0044133	growth of symbiont on or near host	Biological Process	1	ENSMUSP00000023788
5	GO:0044140	negative regulation of growth of symbiont on or near host surface	Biological Process	1	ENSMUSP00000023788
5	GO:0043403	skeletal muscle tissue regeneration	Biological Process	2	ENSMUSP00000109884,ENSMUSP00000064536
5	GO:0055021	regulation of cardiac muscle tissue growth	Biological Process	1	ENSMUSP00000064536
5	GO:0055022	negative regulation of cardiac muscle tissue growth	Biological Process	1	ENSMUSP00000064536
5	GO:0060038	cardiac muscle cell proliferation	Biological Process	1	ENSMUSP00000064536
5	GO:0003401	axis elongation	Biological Process	1	ENSMUSP00000027053
5	GO:0008306	associative learning	Biological Process	1	ENSMUSP00000022176
5	GO:0035106	operant conditioning	Biological Process	1	ENSMUSP00000020278
5	GO:0007614	short-term memory	Biological Process	1	ENSMUSP00000000769
5	GO:0007616	long-term memory	Biological Process	2	ENSMUSP00000133302,ENSMUSP00000034713
5	GO:0022410	circadian sleep/wake cycle process	Biological Process	1	ENSMUSP00000027015
5	GO:0042745	circadian sleep/wake cycle	Biological Process	1	ENSMUSP00000027015
5	GO:0007628	adult walking behavior	Biological Process	1	ENSMUSP00000026262
5	GO:0046010	positive regulation of circadian sleep/wake cycle, non-REM sleep	Biological Process	1	ENSMUSP00000027015
5	GO:0045187	regulation of circadian sleep/wake cycle, sleep	Biological Process	1	ENSMUSP00000027015
5	GO:1904707	positive regulation of vascular smooth muscle cell proliferation	Biological Process	2	ENSMUSP00000025263,ENSMUSP00000034026
5	GO:0001938	positive regulation of endothelial cell proliferation	Biological Process	1	ENSMUSP00000007799
5	GO:0060054	positive regulation of epithelial cell proliferation involved in wound healing	Biological Process	1	ENSMUSP00000109884
5	GO:2000347	positive regulation of hepatocyte proliferation	Biological Process	1	ENSMUSP00000019997
5	GO:0032946	positive regulation of mononuclear cell proliferation	Biological Process	9	ENSMUSP00000095171,ENSMUSP00000033427,ENSMUSP00000028071,ENSMUSP00000028881,ENSMUSP00000016640,ENSMUSP00000122787,ENSMUSP00000039600,ENSMUSP00000004949,ENSMUSP00000015596
5	GO:0001937	negative regulation of endothelial cell proliferation	Biological Process	6	ENSMUSP00000133302,ENSMUSP00000025263,ENSMUSP00000064536,ENSMUSP00000007799,ENSMUSP00000000049,ENSMUSP00000015596
5	GO:0010839	negative regulation of keratinocyte proliferation	Biological Process	1	ENSMUSP00000050374
5	GO:2000346	negative regulation of hepatocyte proliferation	Biological Process	1	ENSMUSP00000022576
5	GO:0032945	negative regulation of mononuclear cell proliferation	Biological Process	6	ENSMUSP00000031840,ENSMUSP00000016640,ENSMUSP00000122787,ENSMUSP00000017153,ENSMUSP00000069850,ENSMUSP00000103056
5	GO:1990874	vascular smooth muscle cell proliferation	Biological Process	2	ENSMUSP00000025263,ENSMUSP00000034026
5	GO:1904705	regulation of vascular smooth muscle cell proliferation	Biological Process	2	ENSMUSP00000025263,ENSMUSP00000034026
5	GO:0001936	regulation of endothelial cell proliferation	Biological Process	6	ENSMUSP00000133302,ENSMUSP00000025263,ENSMUSP00000064536,ENSMUSP00000007799,ENSMUSP00000000049,ENSMUSP00000015596
5	GO:0010837	regulation of keratinocyte proliferation	Biological Process	1	ENSMUSP00000050374
5	GO:0033599	regulation of mammary gland epithelial cell proliferation	Biological Process	2	ENSMUSP00000099907,ENSMUSP00000071715
5	GO:2000345	regulation of hepatocyte proliferation	Biological Process	2	ENSMUSP00000022576,ENSMUSP00000019997
5	GO:0032944	regulation of mononuclear cell proliferation	Biological Process	16	ENSMUSP00000095171,ENSMUSP00000033427,ENSMUSP00000028071,ENSMUSP00000028881,ENSMUSP00000016640,ENSMUSP00000122787,ENSMUSP00000039600,ENSMUSP00000004949,ENSMUSP00000015596,ENSMUSP00000054637,ENSMUSP00000031840,ENSMUSP00000017153,ENSMUSP00000069850,ENSMUSP00000022830,ENSMUSP00000103056,ENSMUSP00000104548
5	GO:0003264	regulation of cardioblast proliferation	Biological Process	1	ENSMUSP00000087485
5	GO:0072574	hepatocyte proliferation	Biological Process	3	ENSMUSP00000022576,ENSMUSP00000019997,ENSMUSP00000069850
5	GO:0051306	mitotic sister chromatid separation	Biological Process	1	ENSMUSP00000031072
5	GO:1905818	regulation of chromosome separation	Biological Process	1	ENSMUSP00000031072
5	GO:1905820	positive regulation of chromosome separation	Biological Process	1	ENSMUSP00000031072
5	GO:0033045	regulation of sister chromatid segregation	Biological Process	1	ENSMUSP00000031072
5	GO:0062033	positive regulation of mitotic sister chromatid segregation	Biological Process	1	ENSMUSP00000031072
5	GO:0000819	sister chromatid segregation	Biological Process	3	ENSMUSP00000047700,ENSMUSP00000031072,ENSMUSP00000136323
5	GO:0051310	metaphase plate congression	Biological Process	1	ENSMUSP00000047700
5	GO:0007020	microtubule nucleation	Biological Process	2	ENSMUSP00000000776,ENSMUSP00000022009
5	GO:0051013	microtubule severing	Biological Process	1	ENSMUSP00000150618
5	GO:0031109	microtubule polymerization or depolymerization	Biological Process	5	ENSMUSP00000030636,ENSMUSP00000022009,ENSMUSP00000000776,ENSMUSP00000126067,ENSMUSP00000007799
5	GO:0031122	cytoplasmic microtubule organization	Biological Process	2	ENSMUSP00000000776,ENSMUSP00000150618
5	GO:0034453	microtubule anchoring	Biological Process	1	ENSMUSP00000033282
5	GO:0051293	establishment of spindle localization	Biological Process	3	ENSMUSP00000127990,ENSMUSP00000033282,ENSMUSP00000037000
5	GO:0070507	regulation of microtubule cytoskeleton organization	Biological Process	8	ENSMUSP00000030636,ENSMUSP00000126067,ENSMUSP00000007799,ENSMUSP00000006625,ENSMUSP00000111309,ENSMUSP00000037000,ENSMUSP00000025779,ENSMUSP00000113252
5	GO:1902850	microtubule cytoskeleton organization involved in mitosis	Biological Process	5	ENSMUSP00000127990,ENSMUSP00000033282,ENSMUSP00000037000,ENSMUSP00000030636,ENSMUSP00000000776
5	GO:0060632	regulation of microtubule-based movement	Biological Process	1	ENSMUSP00000033570
5	GO:0099111	microtubule-based transport	Biological Process	2	ENSMUSP00000036614,ENSMUSP00000101312
5	GO:0098534	centriole assembly	Biological Process	2	ENSMUSP00000006625,ENSMUSP00000062637
5	GO:0044774	mitotic DNA integrity checkpoint	Biological Process	2	ENSMUSP00000030622,ENSMUSP00000057573
5	GO:0044818	mitotic G2/M transition checkpoint	Biological Process	1	ENSMUSP00000030622
5	GO:0044819	mitotic G1/S transition checkpoint	Biological Process	1	ENSMUSP00000057573
5	GO:0000077	DNA damage checkpoint	Biological Process	2	ENSMUSP00000030622,ENSMUSP00000057573
5	GO:0010543	regulation of platelet activation	Biological Process	2	ENSMUSP00000133302,ENSMUSP00000141648
5	GO:0010544	negative regulation of platelet activation	Biological Process	2	ENSMUSP00000141648,ENSMUSP00000133302
5	GO:0070527	platelet aggregation	Biological Process	2	ENSMUSP00000141648,ENSMUSP00000089051
5	GO:0061888	regulation of astrocyte activation	Biological Process	2	ENSMUSP00000034713,ENSMUSP00000015596
5	GO:0061889	negative regulation of astrocyte activation	Biological Process	1	ENSMUSP00000034713
5	GO:0061890	positive regulation of astrocyte activation	Biological Process	1	ENSMUSP00000015596
5	GO:0048143	astrocyte activation	Biological Process	2	ENSMUSP00000034713,ENSMUSP00000015596
5	GO:0051084	'de novo' posttranslational protein folding	Biological Process	5	ENSMUSP00000095171,ENSMUSP00000053916,ENSMUSP00000027961,ENSMUSP00000009707,ENSMUSP00000041380
5	GO:0051085	chaperone cofactor-dependent protein refolding	Biological Process	4	ENSMUSP00000095171,ENSMUSP00000053916,ENSMUSP00000027961,ENSMUSP00000009707
5	GO:1903644	regulation of chaperone-mediated protein folding	Biological Process	1	ENSMUSP00000113761
5	GO:1903645	negative regulation of chaperone-mediated protein folding	Biological Process	1	ENSMUSP00000113761
5	GO:0002768	immune response-regulating cell surface receptor signaling pathway	Biological Process	5	ENSMUSP00000110102,ENSMUSP00000004910,ENSMUSP00000004949,ENSMUSP00000032239,ENSMUSP00000112675
5	GO:0000165	MAPK cascade	Biological Process	35	ENSMUSP00000025263,ENSMUSP00000040307,ENSMUSP00000086459,ENSMUSP00000095171,ENSMUSP00000028881,ENSMUSP00000071715,ENSMUSP00000007799,ENSMUSP00000074471,ENSMUSP00000004949,ENSMUSP00000039604,ENSMUSP00000033570,ENSMUSP00000022176,ENSMUSP00000041503,ENSMUSP00000028882,ENSMUSP00000133302,ENSMUSP00000080974,ENSMUSP00000025523,ENSMUSP00000045527,ENSMUSP00000015596,ENSMUSP00000018645,ENSMUSP00000054499,…
5	GO:0002753	cytoplasmic pattern recognition receptor signaling pathway	Biological Process	2	ENSMUSP00000028259,ENSMUSP00000019997
5	GO:0007249	I-kappaB kinase/NF-kappaB signaling	Biological Process	18	ENSMUSP00000006956,ENSMUSP00000040307,ENSMUSP00000015981,ENSMUSP00000025263,ENSMUSP00000028881,ENSMUSP00000004949,ENSMUSP00000080974,ENSMUSP00000027015,ENSMUSP00000095171,ENSMUSP00000055714,ENSMUSP00000074471,ENSMUSP00000062277,ENSMUSP00000028882,ENSMUSP00000039604,ENSMUSP00000019997,ENSMUSP00000088291,ENSMUSP00000022830,ENSMUSP00000104548
5	GO:0007264	small GTPase mediated signal transduction	Biological Process	9	ENSMUSP00000071715,ENSMUSP00000097756,ENSMUSP00000033900,ENSMUSP00000133302,ENSMUSP00000033560,ENSMUSP00000030636,ENSMUSP00000069851,ENSMUSP00000154338,ENSMUSP00000147997
5	GO:0019932	second-messenger-mediated signaling	Biological Process	14	ENSMUSP00000101734,ENSMUSP00000020312,ENSMUSP00000025263,ENSMUSP00000022009,ENSMUSP00000001008,ENSMUSP00000133302,ENSMUSP00000080974,ENSMUSP00000018610,ENSMUSP00000034214,ENSMUSP00000020964,ENSMUSP00000129001,ENSMUSP00000023832,ENSMUSP00000024791,ENSMUSP00000037206
5	GO:0048017	inositol lipid-mediated signaling	Biological Process	4	ENSMUSP00000025263,ENSMUSP00000039600,ENSMUSP00000025523,ENSMUSP00000081122
5	GO:0031098	stress-activated protein kinase signaling cascade	Biological Process	13	ENSMUSP00000025263,ENSMUSP00000074471,ENSMUSP00000040307,ENSMUSP00000004949,ENSMUSP00000039604,ENSMUSP00000033570,ENSMUSP00000028881,ENSMUSP00000022176,ENSMUSP00000041503,ENSMUSP00000028882,ENSMUSP00000086459,ENSMUSP00000015596,ENSMUSP00000018645
5	GO:0031929	TOR signaling	Biological Process	2	ENSMUSP00000154338,ENSMUSP00000065423
5	GO:0038061	NIK/NF-kappaB signaling	Biological Process	8	ENSMUSP00000080717,ENSMUSP00000040307,ENSMUSP00000004949,ENSMUSP00000056669,ENSMUSP00000025263,ENSMUSP00000028881,ENSMUSP00000015596,ENSMUSP00000022830
5	GO:0042770	signal transduction in response to DNA damage	Biological Process	1	ENSMUSP00000095171
5	GO:0043491	protein kinase B signaling	Biological Process	9	ENSMUSP00000099907,ENSMUSP00000025263,ENSMUSP00000080717,ENSMUSP00000033821,ENSMUSP00000039604,ENSMUSP00000028881,ENSMUSP00000039600,ENSMUSP00000001008,ENSMUSP00000051492
5	GO:0072331	signal transduction by p53 class mediator	Biological Process	2	ENSMUSP00000095171,ENSMUSP00000023217
5	GO:0097193	intrinsic apoptotic signaling pathway	Biological Process	13	ENSMUSP00000025263,ENSMUSP00000050374,ENSMUSP00000117229,ENSMUSP00000041503,ENSMUSP00000069850,ENSMUSP00000095171,ENSMUSP00000035065,ENSMUSP00000062277,ENSMUSP00000112675,ENSMUSP00000137253,ENSMUSP00000022419,ENSMUSP00000022830,ENSMUSP00000007799
5	GO:0097696	STAT cascade	Biological Process	7	ENSMUSP00000015596,ENSMUSP00000037657,ENSMUSP00000025523,ENSMUSP00000039600,ENSMUSP00000112675,ENSMUSP00000007799,ENSMUSP00000104548
5	GO:1902531	regulation of intracellular signal transduction	Biological Process	59	ENSMUSP00000025263,ENSMUSP00000040307,ENSMUSP00000086459,ENSMUSP00000095171,ENSMUSP00000028881,ENSMUSP00000071715,ENSMUSP00000007799,ENSMUSP00000080717,ENSMUSP00000004949,ENSMUSP00000039604,ENSMUSP00000039600,ENSMUSP00000154338,ENSMUSP00000097756,ENSMUSP00000133302,ENSMUSP00000033570,ENSMUSP00000022176,ENSMUSP00000041503,ENSMUSP00000028882,ENSMUSP00000033560,ENSMUSP00000030636,ENSMUSP00000037657,…
5	GO:1902532	negative regulation of intracellular signal transduction	Biological Process	22	ENSMUSP00000007799,ENSMUSP00000154338,ENSMUSP00000033570,ENSMUSP00000030636,ENSMUSP00000037657,ENSMUSP00000112675,ENSMUSP00000104548,ENSMUSP00000019997,ENSMUSP00000088291,ENSMUSP00000133302,ENSMUSP00000028881,ENSMUSP00000022176,ENSMUSP00000095171,ENSMUSP00000018645,ENSMUSP00000039604,ENSMUSP00000020964,ENSMUSP00000127990,ENSMUSP00000035065,ENSMUSP00000062277,ENSMUSP00000137253,ENSMUSP00000022419,…
5	GO:1902533	positive regulation of intracellular signal transduction	Biological Process	38	ENSMUSP00000025263,ENSMUSP00000040307,ENSMUSP00000086459,ENSMUSP00000095171,ENSMUSP00000028881,ENSMUSP00000071715,ENSMUSP00000080717,ENSMUSP00000004949,ENSMUSP00000039604,ENSMUSP00000039600,ENSMUSP00000022176,ENSMUSP00000041503,ENSMUSP00000028882,ENSMUSP00000037657,ENSMUSP00000025523,ENSMUSP00000080974,ENSMUSP00000027015,ENSMUSP00000055714,ENSMUSP00000074471,ENSMUSP00000062277,ENSMUSP00000045527,…
5	GO:0032933	SREBP signaling pathway	Biological Process	1	ENSMUSP00000103056
5	GO:0036499	PERK-mediated unfolded protein response	Biological Process	1	ENSMUSP00000112675
5	GO:0007167	enzyme linked receptor protein signaling pathway	Biological Process	28	ENSMUSP00000025523,ENSMUSP00000029711,ENSMUSP00000023809,ENSMUSP00000022429,ENSMUSP00000021963,ENSMUSP00000034026,ENSMUSP00000145451,ENSMUSP00000037206,ENSMUSP00000086094,ENSMUSP00000112675,ENSMUSP00000051492,ENSMUSP00000126067,ENSMUSP00000047333,ENSMUSP00000007799,ENSMUSP00000058629,ENSMUSP00000109794,ENSMUSP00000026972,ENSMUSP00000048901,ENSMUSP00000062576,ENSMUSP00000028881,ENSMUSP00000127716,…
5	GO:0007215	glutamate receptor signaling pathway	Biological Process	2	ENSMUSP00000043088,ENSMUSP00000020543
5	GO:0007219	Notch signaling pathway	Biological Process	7	ENSMUSP00000036240,ENSMUSP00000087119,ENSMUSP00000047333,ENSMUSP00000007317,ENSMUSP00000146675,ENSMUSP00000032194,ENSMUSP00000085293
5	GO:0007224	smoothened signaling pathway	Biological Process	1	ENSMUSP00000062637
5	GO:0007229	integrin-mediated signaling pathway	Biological Process	4	ENSMUSP00000033053,ENSMUSP00000139147,ENSMUSP00000033800,ENSMUSP00000145451
5	GO:0019221	cytokine-mediated signaling pathway	Biological Process	25	ENSMUSP00000007799,ENSMUSP00000095171,ENSMUSP00000112675,ENSMUSP00000025263,ENSMUSP00000025523,ENSMUSP00000104548,ENSMUSP00000037657,ENSMUSP00000023693,ENSMUSP00000039604,ENSMUSP00000031327,ENSMUSP00000039600,ENSMUSP00000074885,ENSMUSP00000019266,ENSMUSP00000001008,ENSMUSP00000074471,ENSMUSP00000042987,ENSMUSP00000004949,ENSMUSP00000024791,ENSMUSP00000027015,ENSMUSP00000062277,ENSMUSP00000028881,…
5	GO:0023035	CD40 signaling pathway	Biological Process	2	ENSMUSP00000019997,ENSMUSP00000024791
5	GO:0031663	lipopolysaccharide-mediated signaling pathway	Biological Process	10	ENSMUSP00000022124,ENSMUSP00000004949,ENSMUSP00000022722,ENSMUSP00000019997,ENSMUSP00000056669,ENSMUSP00000025263,ENSMUSP00000024791,ENSMUSP00000028881,ENSMUSP00000039600,ENSMUSP00000001008
5	GO:0038179	neurotrophin signaling pathway	Biological Process	1	ENSMUSP00000130684
5	GO:0061311	cell surface receptor signaling pathway involved in heart development	Biological Process	1	ENSMUSP00000036240
5	GO:0071526	semaphorin-plexin signaling pathway	Biological Process	1	ENSMUSP00000109794
5	GO:0097191	extrinsic apoptotic signaling pathway	Biological Process	11	ENSMUSP00000025263,ENSMUSP00000028881,ENSMUSP00000117229,ENSMUSP00000028882,ENSMUSP00000083587,ENSMUSP00000019997,ENSMUSP00000141648,ENSMUSP00000130759,ENSMUSP00000019470,ENSMUSP00000007799,ENSMUSP00000130078
5	GO:1990262	anti-Mullerian hormone signaling pathway	Biological Process	1	ENSMUSP00000023809
5	GO:0003376	sphingosine-1-phosphate receptor signaling pathway	Biological Process	2	ENSMUSP00000053394,ENSMUSP00000085293
5	GO:0007187	G protein-coupled receptor signaling pathway, coupled to cyclic nucleotide second messenger	Biological Process	5	ENSMUSP00000025602,ENSMUSP00000049175,ENSMUSP00000101734,ENSMUSP00000027639,ENSMUSP00000085293
5	GO:0007200	phospholipase C-activating G protein-coupled receptor signaling pathway	Biological Process	2	ENSMUSP00000049175,ENSMUSP00000025602
5	GO:0007212	dopamine receptor signaling pathway	Biological Process	2	ENSMUSP00000025602,ENSMUSP00000049175
5	GO:0007216	G protein-coupled glutamate receptor signaling pathway	Biological Process	1	ENSMUSP00000043088
5	GO:0007217	tachykinin receptor signaling pathway	Biological Process	1	ENSMUSP00000020278
5	GO:0008277	regulation of G protein-coupled receptor signaling pathway	Biological Process	5	ENSMUSP00000039600,ENSMUSP00000096152,ENSMUSP00000030636,ENSMUSP00000126067,ENSMUSP00000127990
5	GO:0045744	negative regulation of G protein-coupled receptor signaling pathway	Biological Process	3	ENSMUSP00000030636,ENSMUSP00000126067,ENSMUSP00000039600
5	GO:0038166	angiotensin-activated signaling pathway	Biological Process	1	ENSMUSP00000007799
5	GO:0038171	cannabinoid signaling pathway	Biological Process	1	ENSMUSP00000043088
5	GO:0045745	positive regulation of G protein-coupled receptor signaling pathway	Biological Process	1	ENSMUSP00000096152
5	GO:0070493	thrombin-activated receptor signaling pathway	Biological Process	3	ENSMUSP00000030636,ENSMUSP00000126067,ENSMUSP00000034026
5	GO:0086103	G protein-coupled receptor signaling pathway involved in heart process	Biological Process	1	ENSMUSP00000007799
5	GO:0043401	steroid hormone mediated signaling pathway	Biological Process	5	ENSMUSP00000055714,ENSMUSP00000094225,ENSMUSP00000095199,ENSMUSP00000047333,ENSMUSP00000018645
5	GO:0010182	sugar mediated signaling pathway	Biological Process	1	ENSMUSP00000015596
5	GO:0001959	regulation of cytokine-mediated signaling pathway	Biological Process	9	ENSMUSP00000007799,ENSMUSP00000095171,ENSMUSP00000112675,ENSMUSP00000037657,ENSMUSP00000039604,ENSMUSP00000039600,ENSMUSP00000024791,ENSMUSP00000027015,ENSMUSP00000062277
5	GO:0008589	regulation of smoothened signaling pathway	Biological Process	1	ENSMUSP00000062637
5	GO:0008593	regulation of Notch signaling pathway	Biological Process	3	ENSMUSP00000087119,ENSMUSP00000047333,ENSMUSP00000036240
5	GO:0010640	regulation of platelet-derived growth factor receptor signaling pathway	Biological Process	2	ENSMUSP00000126067,ENSMUSP00000112675
5	GO:0030111	regulation of Wnt signaling pathway	Biological Process	8	ENSMUSP00000024932,ENSMUSP00000019997,ENSMUSP00000109884,ENSMUSP00000133302,ENSMUSP00000058629,ENSMUSP00000007799,ENSMUSP00000035167,ENSMUSP00000065719
5	GO:0033143	regulation of intracellular steroid hormone receptor signaling pathway	Biological Process	4	ENSMUSP00000055714,ENSMUSP00000094225,ENSMUSP00000047333,ENSMUSP00000018645
5	GO:0034121	regulation of toll-like receptor signaling pathway	Biological Process	5	ENSMUSP00000104548,ENSMUSP00000019997,ENSMUSP00000007799,ENSMUSP00000020970,ENSMUSP00000080974
5	GO:0040036	regulation of fibroblast growth factor receptor signaling pathway	Biological Process	1	ENSMUSP00000026972
5	GO:0046626	regulation of insulin receptor signaling pathway	Biological Process	6	ENSMUSP00000028881,ENSMUSP00000127716,ENSMUSP00000112675,ENSMUSP00000023583,ENSMUSP00000062576,ENSMUSP00000103056
5	GO:0090092	regulation of transmembrane receptor protein serine/threonine kinase signaling pathway	Biological Process	4	ENSMUSP00000047333,ENSMUSP00000007799,ENSMUSP00000058629,ENSMUSP00000037206
5	GO:0098815	modulation of excitatory postsynaptic potential	Biological Process	1	ENSMUSP00000053394
5	GO:1900101	regulation of endoplasmic reticulum unfolded protein response	Biological Process	1	ENSMUSP00000112675
5	GO:1901184	regulation of ERBB signaling pathway	Biological Process	3	ENSMUSP00000048901,ENSMUSP00000112675,ENSMUSP00000099907
5	GO:1902068	regulation of sphingolipid mediated signaling pathway	Biological Process	1	ENSMUSP00000065719
5	GO:1902202	regulation of hepatocyte growth factor receptor signaling pathway	Biological Process	1	ENSMUSP00000112675
5	GO:2000348	regulation of CD40 signaling pathway	Biological Process	2	ENSMUSP00000019997,ENSMUSP00000024791
5	GO:2000638	regulation of SREBP signaling pathway	Biological Process	1	ENSMUSP00000103056
5	GO:2001233	regulation of apoptotic signaling pathway	Biological Process	21	ENSMUSP00000022419,ENSMUSP00000113761,ENSMUSP00000039604,ENSMUSP00000083587,ENSMUSP00000019997,ENSMUSP00000141648,ENSMUSP00000095171,ENSMUSP00000035065,ENSMUSP00000062277,ENSMUSP00000112675,ENSMUSP00000033570,ENSMUSP00000028071,ENSMUSP00000130759,ENSMUSP00000019470,ENSMUSP00000007799,ENSMUSP00000025263,ENSMUSP00000028881,ENSMUSP00000130078,ENSMUSP00000137253,ENSMUSP00000117229,ENSMUSP00000022830
5	GO:0001961	positive regulation of cytokine-mediated signaling pathway	Biological Process	5	ENSMUSP00000037657,ENSMUSP00000024791,ENSMUSP00000027015,ENSMUSP00000062277,ENSMUSP00000095171
5	GO:0030177	positive regulation of Wnt signaling pathway	Biological Process	3	ENSMUSP00000007799,ENSMUSP00000024932,ENSMUSP00000019997
5	GO:0033145	positive regulation of intracellular steroid hormone receptor signaling pathway	Biological Process	2	ENSMUSP00000094225,ENSMUSP00000055714
5	GO:0034123	positive regulation of toll-like receptor signaling pathway	Biological Process	2	ENSMUSP00000007799,ENSMUSP00000020970
5	GO:0046628	positive regulation of insulin receptor signaling pathway	Biological Process	2	ENSMUSP00000062576,ENSMUSP00000103056
5	GO:1900103	positive regulation of endoplasmic reticulum unfolded protein response	Biological Process	1	ENSMUSP00000112675
5	GO:1901186	positive regulation of ERBB signaling pathway	Biological Process	1	ENSMUSP00000099907
5	GO:2000350	positive regulation of CD40 signaling pathway	Biological Process	1	ENSMUSP00000024791
5	GO:2000640	positive regulation of SREBP signaling pathway	Biological Process	1	ENSMUSP00000103056
5	GO:2001235	positive regulation of apoptotic signaling pathway	Biological Process	5	ENSMUSP00000022419,ENSMUSP00000113761,ENSMUSP00000112675,ENSMUSP00000007799,ENSMUSP00000022830
5	GO:0001960	negative regulation of cytokine-mediated signaling pathway	Biological Process	5	ENSMUSP00000112675,ENSMUSP00000037657,ENSMUSP00000039604,ENSMUSP00000039600,ENSMUSP00000007799
5	GO:0010642	negative regulation of platelet-derived growth factor receptor signaling pathway	Biological Process	2	ENSMUSP00000112675,ENSMUSP00000126067
5	GO:0030178	negative regulation of Wnt signaling pathway	Biological Process	4	ENSMUSP00000133302,ENSMUSP00000058629,ENSMUSP00000007799,ENSMUSP00000035167
5	GO:0033144	negative regulation of intracellular steroid hormone receptor signaling pathway	Biological Process	2	ENSMUSP00000047333,ENSMUSP00000018645
5	GO:0045746	negative regulation of Notch signaling pathway	Biological Process	2	ENSMUSP00000087119,ENSMUSP00000047333
5	GO:0046627	negative regulation of insulin receptor signaling pathway	Biological Process	4	ENSMUSP00000028881,ENSMUSP00000127716,ENSMUSP00000112675,ENSMUSP00000023583
5	GO:0090101	negative regulation of transmembrane receptor protein serine/threonine kinase signaling pathway	Biological Process	3	ENSMUSP00000047333,ENSMUSP00000007799,ENSMUSP00000058629
5	GO:0090394	negative regulation of excitatory postsynaptic potential	Biological Process	1	ENSMUSP00000053394
5	GO:1901099	negative regulation of signal transduction in absence of ligand	Biological Process	3	ENSMUSP00000025263,ENSMUSP00000028881,ENSMUSP00000130078
5	GO:1901185	negative regulation of ERBB signaling pathway	Biological Process	1	ENSMUSP00000112675
5	GO:2000349	negative regulation of CD40 signaling pathway	Biological Process	1	ENSMUSP00000019997
5	GO:2001234	negative regulation of apoptotic signaling pathway	Biological Process	15	ENSMUSP00000022419,ENSMUSP00000083587,ENSMUSP00000019997,ENSMUSP00000141648,ENSMUSP00000095171,ENSMUSP00000035065,ENSMUSP00000062277,ENSMUSP00000019470,ENSMUSP00000025263,ENSMUSP00000028881,ENSMUSP00000130078,ENSMUSP00000137253,ENSMUSP00000117229,ENSMUSP00000033570,ENSMUSP00000028071
5	GO:0030518	intracellular steroid hormone receptor signaling pathway	Biological Process	5	ENSMUSP00000055714,ENSMUSP00000094225,ENSMUSP00000095199,ENSMUSP00000047333,ENSMUSP00000018645
5	GO:0035872	nucleotide-binding domain, leucine rich repeat containing receptor signaling pathway	Biological Process	1	ENSMUSP00000019997
5	GO:0097192	extrinsic apoptotic signaling pathway in absence of ligand	Biological Process	5	ENSMUSP00000025263,ENSMUSP00000028881,ENSMUSP00000130078,ENSMUSP00000117229,ENSMUSP00000028882
5	GO:0055096	low-density lipoprotein particle mediated signaling	Biological Process	1	ENSMUSP00000080974
5	GO:0001836	release of cytochrome c from mitochondria	Biological Process	3	ENSMUSP00000022419,ENSMUSP00000113761,ENSMUSP00000050374
5	GO:0097345	mitochondrial outer membrane permeabilization	Biological Process	1	ENSMUSP00000039604
5	GO:0099527	postsynapse to nucleus signaling pathway	Biological Process	1	ENSMUSP00000137310
5	GO:0048207	vesicle targeting, rough ER to cis-Golgi	Biological Process	1	ENSMUSP00000020653
5	GO:0048209	regulation of vesicle targeting, to, from or within Golgi	Biological Process	1	ENSMUSP00000020653
5	GO:0070252	actin-mediated cell contraction	Biological Process	2	ENSMUSP00000087736,ENSMUSP00000007799
5	GO:1903115	regulation of actin filament-based movement	Biological Process	1	ENSMUSP00000007799
5	GO:0007411	axon guidance	Biological Process	2	ENSMUSP00000109794,ENSMUSP00000025523
5	GO:0097491	sympathetic neuron projection guidance	Biological Process	1	ENSMUSP00000109794
5	GO:1902284	neuron projection extension involved in neuron projection guidance	Biological Process	1	ENSMUSP00000109794
5	GO:1902285	semaphorin-plexin signaling pathway involved in neuron projection guidance	Biological Process	1	ENSMUSP00000109794
5	GO:0007520	myoblast fusion	Biological Process	1	ENSMUSP00000027015
5	GO:0007346	regulation of mitotic cell cycle	Biological Process	13	ENSMUSP00000030622,ENSMUSP00000031072,ENSMUSP00000057573,ENSMUSP00000025263,ENSMUSP00000028881,ENSMUSP00000028882,ENSMUSP00000111204,ENSMUSP00000111309,ENSMUSP00000037000,ENSMUSP00000019470,ENSMUSP00000031840,ENSMUSP00000027367,ENSMUSP00000025779
5	GO:0045930	negative regulation of mitotic cell cycle	Biological Process	7	ENSMUSP00000030622,ENSMUSP00000057573,ENSMUSP00000037000,ENSMUSP00000031840,ENSMUSP00000027367,ENSMUSP00000025779,ENSMUSP00000025263
5	GO:0045931	positive regulation of mitotic cell cycle	Biological Process	6	ENSMUSP00000025263,ENSMUSP00000028881,ENSMUSP00000028882,ENSMUSP00000031072,ENSMUSP00000111309,ENSMUSP00000111204
5	GO:1904029	regulation of cyclin-dependent protein kinase activity	Biological Process	3	ENSMUSP00000050374,ENSMUSP00000033282,ENSMUSP00000019997
5	GO:0045736	negative regulation of cyclin-dependent protein serine/threonine kinase activity	Biological Process	1	ENSMUSP00000019997
5	GO:0010645	regulation of cell communication by chemical coupling	Biological Process	1	ENSMUSP00000064536
5	GO:0010652	positive regulation of cell communication by chemical coupling	Biological Process	1	ENSMUSP00000064536
5	GO:0010649	regulation of cell communication by electrical coupling	Biological Process	1	ENSMUSP00000007799
5	GO:0086064	cell communication by electrical coupling involved in cardiac conduction	Biological Process	2	ENSMUSP00000007799,ENSMUSP00000064536
5	GO:0019227	neuronal action potential propagation	Biological Process	1	ENSMUSP00000020964
5	GO:0019228	neuronal action potential	Biological Process	1	ENSMUSP00000028515
5	GO:0031669	cellular response to nutrient levels	Biological Process	5	ENSMUSP00000065423,ENSMUSP00000111204,ENSMUSP00000020543,ENSMUSP00000091692,ENSMUSP00000035065
5	GO:0071460	cellular response to cell-matrix adhesion	Biological Process	1	ENSMUSP00000094225
5	GO:0051294	establishment of spindle orientation	Biological Process	3	ENSMUSP00000127990,ENSMUSP00000033282,ENSMUSP00000037000
5	GO:0061162	establishment of monopolar cell polarity	Biological Process	1	ENSMUSP00000033560
5	GO:0090162	establishment of epithelial cell polarity	Biological Process	2	ENSMUSP00000033560,ENSMUSP00000064536
5	GO:0035088	establishment or maintenance of apical/basal cell polarity	Biological Process	2	ENSMUSP00000022429,ENSMUSP00000033560
5	GO:0032291	axon ensheathment in central nervous system	Biological Process	1	ENSMUSP00000033800
5	GO:0042552	myelination	Biological Process	4	ENSMUSP00000033800,ENSMUSP00000025263,ENSMUSP00000026262,ENSMUSP00000004910
5	GO:0006915	apoptotic process	Biological Process	69	ENSMUSP00000050374,ENSMUSP00000137253,ENSMUSP00000095171,ENSMUSP00000027015,ENSMUSP00000025263,ENSMUSP00000126067,ENSMUSP00000039604,ENSMUSP00000087736,ENSMUSP00000054499,ENSMUSP00000025523,ENSMUSP00000035065,ENSMUSP00000022429,ENSMUSP00000121848,ENSMUSP00000111204,ENSMUSP00000022419,ENSMUSP00000032888,ENSMUSP00000117229,ENSMUSP00000022176,ENSMUSP00000023832,ENSMUSP00000037028,ENSMUSP00000029711,…
5	GO:0043067	regulation of programmed cell death	Biological Process	57	ENSMUSP00000137253,ENSMUSP00000095171,ENSMUSP00000027015,ENSMUSP00000025263,ENSMUSP00000126067,ENSMUSP00000039604,ENSMUSP00000087736,ENSMUSP00000054499,ENSMUSP00000025523,ENSMUSP00000035065,ENSMUSP00000022429,ENSMUSP00000121848,ENSMUSP00000111204,ENSMUSP00000022419,ENSMUSP00000032888,ENSMUSP00000117229,ENSMUSP00000022176,ENSMUSP00000023832,ENSMUSP00000037028,ENSMUSP00000029711,ENSMUSP00000051492,…
5	GO:0043068	positive regulation of programmed cell death	Biological Process	21	ENSMUSP00000027015,ENSMUSP00000025263,ENSMUSP00000126067,ENSMUSP00000039604,ENSMUSP00000022176,ENSMUSP00000035065,ENSMUSP00000099890,ENSMUSP00000070868,ENSMUSP00000028881,ENSMUSP00000113761,ENSMUSP00000041503,ENSMUSP00000034026,ENSMUSP00000037028,ENSMUSP00000015596,ENSMUSP00000001008,ENSMUSP00000022830,ENSMUSP00000039600,ENSMUSP00000022419,ENSMUSP00000112675,ENSMUSP00000016640,ENSMUSP00000007799
5	GO:0043069	negative regulation of programmed cell death	Biological Process	38	ENSMUSP00000137253,ENSMUSP00000095171,ENSMUSP00000087736,ENSMUSP00000054499,ENSMUSP00000025523,ENSMUSP00000035065,ENSMUSP00000022429,ENSMUSP00000121848,ENSMUSP00000111204,ENSMUSP00000022419,ENSMUSP00000032888,ENSMUSP00000117229,ENSMUSP00000022176,ENSMUSP00000126067,ENSMUSP00000023832,ENSMUSP00000037028,ENSMUSP00000029711,ENSMUSP00000051492,ENSMUSP00000056691,ENSMUSP00000007799,ENSMUSP00000069851,…
5	GO:0070269	pyroptosis	Biological Process	1	ENSMUSP00000027015
5	GO:0097300	programmed necrotic cell death	Biological Process	6	ENSMUSP00000022830,ENSMUSP00000007799,ENSMUSP00000022419,ENSMUSP00000025263,ENSMUSP00000002737,ENSMUSP00000027015
5	GO:1902686	mitochondrial outer membrane permeabilization involved in programmed cell death	Biological Process	2	ENSMUSP00000039604,ENSMUSP00000022419
5	GO:0010939	regulation of necrotic cell death	Biological Process	3	ENSMUSP00000022830,ENSMUSP00000007799,ENSMUSP00000022419
5	GO:0010940	positive regulation of necrotic cell death	Biological Process	1	ENSMUSP00000022830
5	GO:0060547	negative regulation of necrotic cell death	Biological Process	1	ENSMUSP00000007799
5	GO:1901214	regulation of neuron death	Biological Process	13	ENSMUSP00000133302,ENSMUSP00000089051,ENSMUSP00000020543,ENSMUSP00000126067,ENSMUSP00000069850,ENSMUSP00000025263,ENSMUSP00000028881,ENSMUSP00000001008,ENSMUSP00000015596,ENSMUSP00000031840,ENSMUSP00000039600,ENSMUSP00000000769,ENSMUSP00000058629
5	GO:1903201	regulation of oxidative stress-induced cell death	Biological Process	1	ENSMUSP00000058629
5	GO:1901216	positive regulation of neuron death	Biological Process	5	ENSMUSP00000025263,ENSMUSP00000028881,ENSMUSP00000001008,ENSMUSP00000015596,ENSMUSP00000126067
5	GO:0008631	intrinsic apoptotic signaling pathway in response to oxidative stress	Biological Process	1	ENSMUSP00000041503
5	GO:0036475	neuron death in response to oxidative stress	Biological Process	1	ENSMUSP00000058629
5	GO:1903202	negative regulation of oxidative stress-induced cell death	Biological Process	1	ENSMUSP00000058629
5	GO:1901215	negative regulation of neuron death	Biological Process	9	ENSMUSP00000133302,ENSMUSP00000089051,ENSMUSP00000020543,ENSMUSP00000126067,ENSMUSP00000069850,ENSMUSP00000058629,ENSMUSP00000031840,ENSMUSP00000039600,ENSMUSP00000000769
5	GO:0051402	neuron apoptotic process	Biological Process	9	ENSMUSP00000133302,ENSMUSP00000089051,ENSMUSP00000020543,ENSMUSP00000126067,ENSMUSP00000069850,ENSMUSP00000025263,ENSMUSP00000028881,ENSMUSP00000001008,ENSMUSP00000015596
5	GO:0007413	axonal fasciculation	Biological Process	1	ENSMUSP00000099907
5	GO:0006333	chromatin assembly or disassembly	Biological Process	3	ENSMUSP00000116252,ENSMUSP00000137253,ENSMUSP00000086094
5	GO:0034728	nucleosome organization	Biological Process	2	ENSMUSP00000116252,ENSMUSP00000086094
5	GO:0006338	chromatin remodeling	Biological Process	3	ENSMUSP00000086094,ENSMUSP00000110232,ENSMUSP00000047333
5	GO:0016569	covalent chromatin modification	Biological Process	11	ENSMUSP00000089948,ENSMUSP00000119057,ENSMUSP00000042987,ENSMUSP00000028071,ENSMUSP00000006625,ENSMUSP00000133279,ENSMUSP00000103056,ENSMUSP00000137253,ENSMUSP00000126067,ENSMUSP00000040307,ENSMUSP00000025444
5	GO:1902275	regulation of chromatin organization	Biological Process	5	ENSMUSP00000133279,ENSMUSP00000103056,ENSMUSP00000042987,ENSMUSP00000137253,ENSMUSP00000126067
5	GO:1905268	negative regulation of chromatin organization	Biological Process	3	ENSMUSP00000137253,ENSMUSP00000126067,ENSMUSP00000133279
5	GO:1905269	positive regulation of chromatin organization	Biological Process	3	ENSMUSP00000133279,ENSMUSP00000103056,ENSMUSP00000042987
5	GO:0051276	chromosome organization	Biological Process	28	ENSMUSP00000020931,ENSMUSP00000018985,ENSMUSP00000116252,ENSMUSP00000137253,ENSMUSP00000156132,ENSMUSP00000000505,ENSMUSP00000086094,ENSMUSP00000021807,ENSMUSP00000062576,ENSMUSP00000047333,ENSMUSP00000119057,ENSMUSP00000103486,ENSMUSP00000028071,ENSMUSP00000110232,ENSMUSP00000089948,ENSMUSP00000047700,ENSMUSP00000042987,ENSMUSP00000006625,ENSMUSP00000031072,ENSMUSP00000133279,ENSMUSP00000103056,…
5	GO:0007010	cytoskeleton organization	Biological Process	47	ENSMUSP00000127990,ENSMUSP00000033282,ENSMUSP00000037000,ENSMUSP00000000776,ENSMUSP00000085566,ENSMUSP00000033560,ENSMUSP00000062277,ENSMUSP00000103546,ENSMUSP00000033721,ENSMUSP00000030636,ENSMUSP00000022009,ENSMUSP00000111309,ENSMUSP00000022784,ENSMUSP00000049973,ENSMUSP00000150618,ENSMUSP00000096152,ENSMUSP00000087736,ENSMUSP00000047275,ENSMUSP00000083587,ENSMUSP00000025263,ENSMUSP00000126067,…
5	GO:0007033	vacuole organization	Biological Process	7	ENSMUSP00000026173,ENSMUSP00000045201,ENSMUSP00000147061,ENSMUSP00000026262,ENSMUSP00000024932,ENSMUSP00000042918,ENSMUSP00000033900
5	GO:0006997	nucleus organization	Biological Process	5	ENSMUSP00000101312,ENSMUSP00000121309,ENSMUSP00000113537,ENSMUSP00000047700,ENSMUSP00000099907
5	GO:0007005	mitochondrion organization	Biological Process	24	ENSMUSP00000039604,ENSMUSP00000026173,ENSMUSP00000045201,ENSMUSP00000147061,ENSMUSP00000015981,ENSMUSP00000050374,ENSMUSP00000027492,ENSMUSP00000126067,ENSMUSP00000027114,ENSMUSP00000022419,ENSMUSP00000024887,ENSMUSP00000030103,ENSMUSP00000017332,ENSMUSP00000023761,ENSMUSP00000054856,ENSMUSP00000096185,ENSMUSP00000041380,ENSMUSP00000021203,ENSMUSP00000127716,ENSMUSP00000069965,ENSMUSP00000113761,…
5	GO:0007029	endoplasmic reticulum organization	Biological Process	3	ENSMUSP00000099907,ENSMUSP00000032888,ENSMUSP00000130684
5	GO:0007030	Golgi organization	Biological Process	1	ENSMUSP00000034460
5	GO:0007031	peroxisome organization	Biological Process	1	ENSMUSP00000019945
5	GO:0010638	positive regulation of organelle organization	Biological Process	19	ENSMUSP00000083587,ENSMUSP00000133279,ENSMUSP00000103056,ENSMUSP00000007799,ENSMUSP00000070868,ENSMUSP00000086459,ENSMUSP00000042987,ENSMUSP00000034746,ENSMUSP00000025263,ENSMUSP00000028881,ENSMUSP00000028882,ENSMUSP00000031072,ENSMUSP00000111309,ENSMUSP00000049440,ENSMUSP00000017153,ENSMUSP00000039604,ENSMUSP00000022419,ENSMUSP00000113761,ENSMUSP00000065423
5	GO:0010639	negative regulation of organelle organization	Biological Process	12	ENSMUSP00000039604,ENSMUSP00000030636,ENSMUSP00000126067,ENSMUSP00000137253,ENSMUSP00000045527,ENSMUSP00000006625,ENSMUSP00000049440,ENSMUSP00000033721,ENSMUSP00000096152,ENSMUSP00000022419,ENSMUSP00000133279,ENSMUSP00000065423
5	GO:0016050	vesicle organization	Biological Process	7	ENSMUSP00000020653,ENSMUSP00000015981,ENSMUSP00000089051,ENSMUSP00000070868,ENSMUSP00000044877,ENSMUSP00000033900,ENSMUSP00000017153
5	GO:0033043	regulation of organelle organization	Biological Process	34	ENSMUSP00000020653,ENSMUSP00000039604,ENSMUSP00000031072,ENSMUSP00000047275,ENSMUSP00000083587,ENSMUSP00000133279,ENSMUSP00000103056,ENSMUSP00000030636,ENSMUSP00000126067,ENSMUSP00000007799,ENSMUSP00000089051,ENSMUSP00000070868,ENSMUSP00000086459,ENSMUSP00000028882,ENSMUSP00000045527,ENSMUSP00000042987,ENSMUSP00000137253,ENSMUSP00000034746,ENSMUSP00000025263,ENSMUSP00000028881,ENSMUSP00000006625,…
5	GO:0044782	cilium organization	Biological Process	7	ENSMUSP00000151388,ENSMUSP00000036240,ENSMUSP00000035167,ENSMUSP00000062637,ENSMUSP00000091319,ENSMUSP00000045527,ENSMUSP00000034746
5	GO:0048284	organelle fusion	Biological Process	5	ENSMUSP00000039604,ENSMUSP00000089051,ENSMUSP00000070868,ENSMUSP00000044877,ENSMUSP00000033900
5	GO:0048285	organelle fission	Biological Process	10	ENSMUSP00000039604,ENSMUSP00000047700,ENSMUSP00000031072,ENSMUSP00000025263,ENSMUSP00000028881,ENSMUSP00000028882,ENSMUSP00000111309,ENSMUSP00000136323,ENSMUSP00000033282,ENSMUSP00000000776
5	GO:0070925	organelle assembly	Biological Process	28	ENSMUSP00000023217,ENSMUSP00000069004,ENSMUSP00000026173,ENSMUSP00000045201,ENSMUSP00000147061,ENSMUSP00000151388,ENSMUSP00000036240,ENSMUSP00000035167,ENSMUSP00000062637,ENSMUSP00000091319,ENSMUSP00000096152,ENSMUSP00000087736,ENSMUSP00000056715,ENSMUSP00000102213,ENSMUSP00000027492,ENSMUSP00000071486,ENSMUSP00000007317,ENSMUSP00000045527,ENSMUSP00000034746,ENSMUSP00000006625,ENSMUSP00000022784,…
5	GO:0090382	phagosome maturation	Biological Process	1	ENSMUSP00000033900
5	GO:0099084	postsynaptic specialization organization	Biological Process	1	ENSMUSP00000033560
[truncated: 3,851 more rows]

## Sheet: B_VS_A_MF
Level	GO_ID	Term	Type	Seqs_Num	Sequences
[truncated: 1,012 more rows]

## Sheet: B_VS_A_CC
Level	GO_ID	Term	Type	Seqs_Num	Sequences
[truncated: 744 more rows]

## Sheet: B_VS_A_Enrichment
GO_ID	Term	Category	Test	Ref	TestAll	RefAll	Test_per	Ref_per	Over_Under	TestSeqs	RefSeqs	P value	FDR	richFactor
[truncated: 7,535 more rows]

[truncated: 8 more sheets: C_VS_A_BP, C_VS_A_MF, C_VS_A_CC, C_VS_A_Enrichment, C_VS_B_BP, C_VS_B_MF, C_VS_B_CC, C_VS_B_Enrichment]
