# Supplementary material for: Transcriptomics and quantitative proteomics reveal changes after second stimulation of bone marrow-derived macrophages from lupus-prone MRL/lpr mice
Source: Front Immunol. 2022 Oct 19;13:1004232. doi: 10.3389/fimmu.2022.1004232 (PMC9627492; doi:10.3389/fimmu.2022.1004232)
Supplement: Supplementary file 14 [file Table_14.xlsx]

## Sheet: B_VS_A_Enrichment
Level1	Level2	Map_ID	Map_Name	Test	TestAll	Ref	RefAll	Test_per	Ref_per	Test_Seq	Ref_Seq	Over_Under	P value	FDR	richFactor
Environmental Information Processing	Signaling molecules and interaction	mmu04060	Cytokine-cytokine receptor interaction	14	579	27	6012	0.02418	0.004491	ENSMUSP00000025523 ENSMUSP00000025263 ENSMUSP00000028881 ENSMUSP00000031327 ENSMUSP00000023693 ENSMUSP00000019064 ENSMUSP00000039600 ENSMUSP00000028882 ENSMUSP00000021970 ENSMUSP00000074885 ENSMUSP00000019266 ENSMUSP00000054637 ENSMUSP00000001008 ENSMUSP00000023809	ENSMUSP00000025523 ENSMUSP00000017799 ENSMUSP00000002678 ENSMUSP00000025263 ENSMUSP00000028881 ENSMUSP00000007757 ENSMUSP00000031327 ENSMUSP00000036326 ENSMUSP00000030336 ENSMUSP00000154836 ENSMUSP00000023693 ENSMUSP00000019064 ENSMUSP00000039600 ENSMUSP00000028882 ENSMUSP00000151575 ENSMUSP00000021970 ENSMUSP00000093843 ENSMUSP00000001792 ENSMUSP00000032211 ENSMUSP00000020188 ENSMUSP00000074885 …	over	3.10964e-08	8.33385e-06	0.518519
Environmental Information Processing	Signaling molecules and interaction	mmu04061	Viral protein interaction with cytokine and cytokine receptor	8	579	11	6012	0.013817	0.00183	ENSMUSP00000025523 ENSMUSP00000025263 ENSMUSP00000031327 ENSMUSP00000039600 ENSMUSP00000021970 ENSMUSP00000074885 ENSMUSP00000019266 ENSMUSP00000001008	ENSMUSP00000025523 ENSMUSP00000025263 ENSMUSP00000031327 ENSMUSP00000030336 ENSMUSP00000039600 ENSMUSP00000151575 ENSMUSP00000021970 ENSMUSP00000074885 ENSMUSP00000019266 ENSMUSP00000026911 ENSMUSP00000001008	over	8.96883e-07	0.000120182	0.727273
Environmental Information Processing	Signal transduction	mmu04668	TNF signaling pathway	18	579	58	6012	0.031088	0.009647	ENSMUSP00000083587 ENSMUSP00000104825 ENSMUSP00000035065 ENSMUSP00000087119 ENSMUSP00000025263 ENSMUSP00000019997 ENSMUSP00000064680 ENSMUSP00000028881 ENSMUSP00000031327 ENSMUSP00000095329 ENSMUSP00000022830 ENSMUSP00000039600 ENSMUSP00000040307 ENSMUSP00000069850 ENSMUSP00000104548 ENSMUSP00000074885 ENSMUSP00000042987 ENSMUSP00000130759	ENSMUSP00000155155 ENSMUSP00000083587 ENSMUSP00000104825 ENSMUSP00000156154 ENSMUSP00000056774 ENSMUSP00000051619 ENSMUSP00000035065 ENSMUSP00000029812 ENSMUSP00000029574 ENSMUSP00000108124 ENSMUSP00000057760 ENSMUSP00000140546 ENSMUSP00000035037 ENSMUSP00000061958 ENSMUSP00000025867 ENSMUSP00000087119 ENSMUSP00000033939 ENSMUSP00000021844 ENSMUSP00000004330 ENSMUSP00000055521 ENSMUSP00000025263 …	over	4.42765e-06	0.000395536	0.310345
Human Diseases	Infectious disease: bacterial	mmu05150	Staphylococcus aureus infection	13	579	37	6012	0.022453	0.006154	ENSMUSP00000007272 ENSMUSP00000079699 ENSMUSP00000099420 ENSMUSP00000083587 ENSMUSP00000007280 ENSMUSP00000007275 ENSMUSP00000007318 ENSMUSP00000007317 ENSMUSP00000018399 ENSMUSP00000027966 ENSMUSP00000099416 ENSMUSP00000141648 ENSMUSP00000028233	ENSMUSP00000000299 ENSMUSP00000068468 ENSMUSP00000007272 ENSMUSP00000079699 ENSMUSP00000024988 ENSMUSP00000101913 ENSMUSP00000099420 ENSMUSP00000083587 ENSMUSP00000007280 ENSMUSP00000017270 ENSMUSP00000007275 ENSMUSP00000029748 ENSMUSP00000007318 ENSMUSP00000007317 ENSMUSP00000018399 ENSMUSP00000079882 ENSMUSP00000027966 ENSMUSP00000041008 ENSMUSP00000131938 ENSMUSP00000103039 ENSMUSP00000099416 …	over	2.16165e-05	0.00144831	0.351351
Environmental Information Processing	Signal transduction	mmu04064	NF-kappa B signaling pathway	14	579	45	6012	0.02418	0.007485	ENSMUSP00000083587 ENSMUSP00000056669 ENSMUSP00000035065 ENSMUSP00000025263 ENSMUSP00000019997 ENSMUSP00000055714 ENSMUSP00000028881 ENSMUSP00000074471 ENSMUSP00000031327 ENSMUSP00000095329 ENSMUSP00000040307 ENSMUSP00000074885 ENSMUSP00000130759 ENSMUSP00000004949	ENSMUSP00000079991 ENSMUSP00000027777 ENSMUSP00000100075 ENSMUSP00000113852 ENSMUSP00000083587 ENSMUSP00000072859 ENSMUSP00000056669 ENSMUSP00000033617 ENSMUSP00000042433 ENSMUSP00000138788 ENSMUSP00000035065 ENSMUSP00000029812 ENSMUSP00000029574 ENSMUSP00000096829 ENSMUSP00000017799 ENSMUSP00000025867 ENSMUSP00000033939 ENSMUSP00000021844 ENSMUSP00000055919 ENSMUSP00000004330 ENSMUSP00000103528 …	over	4.99817e-05	0.00267902	0.311111
Human Diseases	Immune disease	mmu05323	Rheumatoid arthritis	11	579	36	6012	0.018998	0.005988	ENSMUSP00000083587 ENSMUSP00000029900 ENSMUSP00000024932 ENSMUSP00000025263 ENSMUSP00000028881 ENSMUSP00000048770 ENSMUSP00000031327 ENSMUSP00000039600 ENSMUSP00000028882 ENSMUSP00000074885 ENSMUSP00000001008	ENSMUSP00000000299 ENSMUSP00000110314 ENSMUSP00000006435 ENSMUSP00000122474 ENSMUSP00000099399 ENSMUSP00000040756 ENSMUSP00000101913 ENSMUSP00000022904 ENSMUSP00000083587 ENSMUSP00000019354 ENSMUSP00000013304 ENSMUSP00000152169 ENSMUSP00000029900 ENSMUSP00000029623 ENSMUSP00000002678 ENSMUSP00000021536 ENSMUSP00000039737 ENSMUSP00000024932 ENSMUSP00000027165 ENSMUSP00000019231 ENSMUSP00000041008 …	over	0.000383065	0.0150652	0.305556
Metabolism	Lipid metabolism	mmu00591	Linoleic acid metabolism	4	579	5	6012	0.006908	0.000832	ENSMUSP00000070868 ENSMUSP00000132180 ENSMUSP00000026211 ENSMUSP00000031741	ENSMUSP00000070868 ENSMUSP00000119403 ENSMUSP00000132180 ENSMUSP00000026211 ENSMUSP00000031741	over	0.000393495	0.0150652	0.8
Environmental Information Processing	Signaling molecules and interaction	mmu04080	Neuroactive ligand-receptor interaction	7	579	21	6012	0.01209	0.003493	ENSMUSP00000095199 ENSMUSP00000053394 ENSMUSP00000031931 ENSMUSP00000028233 ENSMUSP00000028515 ENSMUSP00000020278 ENSMUSP00000085293	ENSMUSP00000024988 ENSMUSP00000031429 ENSMUSP00000098303 ENSMUSP00000028681 ENSMUSP00000129972 ENSMUSP00000014578 ENSMUSP00000015583 ENSMUSP00000095199 ENSMUSP00000048092 ENSMUSP00000053394 ENSMUSP00000071976 ENSMUSP00000070925 ENSMUSP00000065799 ENSMUSP00000052894 ENSMUSP00000031931 ENSMUSP00000028233 ENSMUSP00000028515 ENSMUSP00000020278 ENSMUSP00000054233 ENSMUSP00000085293 ENSMUSP00000104479	over	0.00258646	0.0866463	0.333333
Human Diseases	Infectious disease: bacterial	mmu05133	Pertussis	10	579	39	6012	0.017271	0.006487	ENSMUSP00000056669 ENSMUSP00000027015 ENSMUSP00000025263 ENSMUSP00000018610 ENSMUSP00000028881 ENSMUSP00000074471 ENSMUSP00000028882 ENSMUSP00000104548 ENSMUSP00000028233 ENSMUSP00000004949	ENSMUSP00000000299 ENSMUSP00000068468 ENSMUSP00000087457 ENSMUSP00000142326 ENSMUSP00000147514 ENSMUSP00000019514 ENSMUSP00000023128 ENSMUSP00000024988 ENSMUSP00000000001 ENSMUSP00000156154 ENSMUSP00000056669 ENSMUSP00000007959 ENSMUSP00000051619 ENSMUSP00000029812 ENSMUSP00000027015 ENSMUSP00000078440 ENSMUSP00000061958 ENSMUSP00000025867 ENSMUSP00000077262 ENSMUSP00000025263 ENSMUSP00000018610 …	over	0.00306511	0.0912721	0.25641
Organismal Systems	Immune system	mmu04640	Hematopoietic cell lineage	7	579	22	6012	0.01209	0.003659	ENSMUSP00000056669 ENSMUSP00000080974 ENSMUSP00000025523 ENSMUSP00000025263 ENSMUSP00000028881 ENSMUSP00000028882 ENSMUSP00000029717	ENSMUSP00000103015 ENSMUSP00000068468 ENSMUSP00000023486 ENSMUSP00000023128 ENSMUSP00000099718 ENSMUSP00000056669 ENSMUSP00000080974 ENSMUSP00000025523 ENSMUSP00000005218 ENSMUSP00000021028 ENSMUSP00000029748 ENSMUSP00000032492 ENSMUSP00000074902 ENSMUSP00000019248 ENSMUSP00000041008 ENSMUSP00000025263 ENSMUSP00000028881 ENSMUSP00000046105 ENSMUSP00000028882 ENSMUSP00000033063 ENSMUSP00000029717 …	over	0.00348375	0.0933646	0.318182
Metabolism	Lipid metabolism	mmu00590	Arachidonic acid metabolism	6	579	18	6012	0.010363	0.002994	ENSMUSP00000035065 ENSMUSP00000059977 ENSMUSP00000070868 ENSMUSP00000099916 ENSMUSP00000132180 ENSMUSP00000026211	ENSMUSP00000016033 ENSMUSP00000003017 ENSMUSP00000035065 ENSMUSP00000049394 ENSMUSP00000028162 ENSMUSP00000059977 ENSMUSP00000031982 ENSMUSP00000047712 ENSMUSP00000070868 ENSMUSP00000026148 ENSMUSP00000050292 ENSMUSP00000081010 ENSMUSP00000030935 ENSMUSP00000026795 ENSMUSP00000119403 ENSMUSP00000099916 ENSMUSP00000132180 ENSMUSP00000026211	over	0.0052536	0.120288	0.333333
Organismal Systems	Endocrine system	mmu04913	Ovarian steroidogenesis	5	579	13	6012	0.008636	0.002162	ENSMUSP00000035065 ENSMUSP00000070868 ENSMUSP00000034713 ENSMUSP00000027989 ENSMUSP00000132180	ENSMUSP00000130594 ENSMUSP00000085179 ENSMUSP00000005606 ENSMUSP00000035065 ENSMUSP00000099573 ENSMUSP00000021649 ENSMUSP00000088837 ENSMUSP00000126448 ENSMUSP00000070868 ENSMUSP00000034713 ENSMUSP00000027989 ENSMUSP00000026795 ENSMUSP00000132180	over	0.00543658	0.120288	0.384615
Human Diseases	Infectious disease: viral	mmu05168	Herpes simplex virus 1 infection	21	579	122	6012	0.036269	0.020293	ENSMUSP00000028259 ENSMUSP00000083474 ENSMUSP00000095171 ENSMUSP00000061474 ENSMUSP00000025263 ENSMUSP00000028881 ENSMUSP00000099534 ENSMUSP00000074471 ENSMUSP00000090059 ENSMUSP00000023693 ENSMUSP00000039600 ENSMUSP00000116259 ENSMUSP00000040307 ENSMUSP00000120525 ENSMUSP00000004987 ENSMUSP00000154338 ENSMUSP00000004910 ENSMUSP00000028233 ENSMUSP00000004949 ENSMUSP00000131297 ENSMUSP00000113244	ENSMUSP00000028683 ENSMUSP00000003912 ENSMUSP00000023128 ENSMUSP00000024988 ENSMUSP00000141132 ENSMUSP00000071214 ENSMUSP00000099842 ENSMUSP00000113852 ENSMUSP00000103553 ENSMUSP00000110012 ENSMUSP00000028259 ENSMUSP00000025161 ENSMUSP00000039109 ENSMUSP00000083474 ENSMUSP00000134004 ENSMUSP00000128401 ENSMUSP00000056774 ENSMUSP00000079198 ENSMUSP00000010241 ENSMUSP00000125291 ENSMUSP00000015100 …	over	0.00583487	0.120288	0.172131
Metabolism	Lipid metabolism	mmu00565	Ether lipid metabolism	6	579	19	6012	0.010363	0.00316	ENSMUSP00000067002 ENSMUSP00000024706 ENSMUSP00000070868 ENSMUSP00000022099 ENSMUSP00000065719 ENSMUSP00000064423	ENSMUSP00000021091 ENSMUSP00000067002 ENSMUSP00000041967 ENSMUSP00000113820 ENSMUSP00000024706 ENSMUSP00000049252 ENSMUSP00000020804 ENSMUSP00000070868 ENSMUSP00000118727 ENSMUSP00000005583 ENSMUSP00000104197 ENSMUSP00000022099 ENSMUSP00000037277 ENSMUSP00000101496 ENSMUSP00000065719 ENSMUSP00000069670 ENSMUSP00000064423 ENSMUSP00000127851 ENSMUSP00000119403	over	0.00706472	0.126515	0.315789
Human Diseases	Infectious disease: parasitic	mmu05143	African trypanosomiasis	5	579	14	6012	0.008636	0.002329	ENSMUSP00000083587 ENSMUSP00000090897 ENSMUSP00000025263 ENSMUSP00000028881 ENSMUSP00000105736	ENSMUSP00000005057 ENSMUSP00000083587 ENSMUSP00000025912 ENSMUSP00000025541 ENSMUSP00000138788 ENSMUSP00000029574 ENSMUSP00000082207 ENSMUSP00000090897 ENSMUSP00000025263 ENSMUSP00000095794 ENSMUSP00000028881 ENSMUSP00000035092 ENSMUSP00000099583 ENSMUSP00000105736	over	0.0077969	0.126515	0.357143
Environmental Information Processing	Signal transduction	mmu04020	Calcium signaling pathway	11	579	51	6012	0.018998	0.008483	ENSMUSP00000020312 ENSMUSP00000018610 ENSMUSP00000022419 ENSMUSP00000025602 ENSMUSP00000050788 ENSMUSP00000049175 ENSMUSP00000069851 ENSMUSP00000020278 ENSMUSP00000099617 ENSMUSP00000026617 ENSMUSP00000105736	ENSMUSP00000020107 ENSMUSP00000135935 ENSMUSP00000079991 ENSMUSP00000020673 ENSMUSP00000134023 ENSMUSP00000016463 ENSMUSP00000022622 ENSMUSP00000034049 ENSMUSP00000019514 ENSMUSP00000009036 ENSMUSP00000021142 ENSMUSP00000077273 ENSMUSP00000031429 ENSMUSP00000130594 ENSMUSP00000098303 ENSMUSP00000085179 ENSMUSP00000025912 ENSMUSP00000025541 ENSMUSP00000005606 ENSMUSP00000049584 ENSMUSP00000071040 …	over	0.00802523	0.126515	0.215686
Human Diseases	Infectious disease: parasitic	mmu05146	Amoebiasis	11	579	51	6012	0.018998	0.008483	ENSMUSP00000054499 ENSMUSP00000056669 ENSMUSP00000025263 ENSMUSP00000018610 ENSMUSP00000028881 ENSMUSP00000031327 ENSMUSP00000025602 ENSMUSP00000029717 ENSMUSP00000074885 ENSMUSP00000049175 ENSMUSP00000105736	ENSMUSP00000066068 ENSMUSP00000021554 ENSMUSP00000000299 ENSMUSP00000022369 ENSMUSP00000068468 ENSMUSP00000054499 ENSMUSP00000109230 ENSMUSP00000114159 ENSMUSP00000017188 ENSMUSP00000030454 ENSMUSP00000102987 ENSMUSP00000085179 ENSMUSP00000025912 ENSMUSP00000056774 ENSMUSP00000056669 ENSMUSP00000021550 ENSMUSP00000025541 ENSMUSP00000005606 ENSMUSP00000138788 ENSMUSP00000065456 ENSMUSP00000029812 …	over	0.00802523	0.126515	0.215686
Organismal Systems	Development and regeneration	mmu04380	Osteoclast differentiation	14	579	74	6012	0.02418	0.012309	ENSMUSP00000025523 ENSMUSP00000070073 ENSMUSP00000015981 ENSMUSP00000027966 ENSMUSP00000025263 ENSMUSP00000024791 ENSMUSP00000064680 ENSMUSP00000028881 ENSMUSP00000023693 ENSMUSP00000028882 ENSMUSP00000040307 ENSMUSP00000120525 ENSMUSP00000004949 ENSMUSP00000129001	ENSMUSP00000079991 ENSMUSP00000140404 ENSMUSP00000141132 ENSMUSP00000099842 ENSMUSP00000113852 ENSMUSP00000016094 ENSMUSP00000099492 ENSMUSP00000156154 ENSMUSP00000072859 ENSMUSP00000056774 ENSMUSP00000102106 ENSMUSP00000033617 ENSMUSP00000025523 ENSMUSP00000104255 ENSMUSP00000094084 ENSMUSP00000051619 ENSMUSP00000071040 ENSMUSP00000098058 ENSMUSP00000100872 ENSMUSP00000021028 ENSMUSP00000029812 …	over	0.00997651	0.148539	0.189189
Organismal Systems	Immune system	mmu04657	IL-17 signaling pathway	9	579	40	6012	0.015544	0.006653	ENSMUSP00000035065 ENSMUSP00000025263 ENSMUSP00000019997 ENSMUSP00000028881 ENSMUSP00000031327 ENSMUSP00000040307 ENSMUSP00000069850 ENSMUSP00000074885 ENSMUSP00000004949	ENSMUSP00000024739 ENSMUSP00000020238 ENSMUSP00000091921 ENSMUSP00000103553 ENSMUSP00000156154 ENSMUSP00000051619 ENSMUSP00000020316 ENSMUSP00000035065 ENSMUSP00000029812 ENSMUSP00000096549 ENSMUSP00000140546 ENSMUSP00000061958 ENSMUSP00000025867 ENSMUSP00000033939 ENSMUSP00000004330 ENSMUSP00000110398 ENSMUSP00000025263 ENSMUSP00000019997 ENSMUSP00000054126 ENSMUSP00000147767 ENSMUSP00000070842 …	over	0.0120324	0.169721	0.225
Human Diseases	Cardiovascular disease	mmu05417	Lipid and atherosclerosis	18	579	107	6012	0.031088	0.017798	ENSMUSP00000083587 ENSMUSP00000056669 ENSMUSP00000080974 ENSMUSP00000027015 ENSMUSP00000025263 ENSMUSP00000028881 ENSMUSP00000074471 ENSMUSP00000031327 ENSMUSP00000039600 ENSMUSP00000034713 ENSMUSP00000040307 ENSMUSP00000074885 ENSMUSP00000004949 ENSMUSP00000001008 ENSMUSP00000129001 ENSMUSP00000132180 ENSMUSP00000015596 ENSMUSP00000105736	ENSMUSP00000028222 ENSMUSP00000024739 ENSMUSP00000015800 ENSMUSP00000020238 ENSMUSP00000020630 ENSMUSP00000091921 ENSMUSP00000027123 ENSMUSP00000152813 ENSMUSP00000140404 ENSMUSP00000096280 ENSMUSP00000015484 ENSMUSP00000100075 ENSMUSP00000019514 ENSMUSP00000071214 ENSMUSP00000005889 ENSMUSP00000016094 ENSMUSP00000083587 ENSMUSP00000156154 ENSMUSP00000030010 ENSMUSP00000025912 ENSMUSP00000022378 …	over	0.0129419	0.173422	0.168224
Human Diseases	Infectious disease: parasitic	mmu05142	Chagas disease	11	579	55	6012	0.018998	0.009148	ENSMUSP00000025263 ENSMUSP00000018610 ENSMUSP00000028881 ENSMUSP00000074471 ENSMUSP00000025602 ENSMUSP00000095329 ENSMUSP00000039600 ENSMUSP00000049175 ENSMUSP00000004949 ENSMUSP00000001008 ENSMUSP00000105736	ENSMUSP00000003912 ENSMUSP00000142326 ENSMUSP00000024988 ENSMUSP00000007708 ENSMUSP00000000001 ENSMUSP00000156154 ENSMUSP00000085179 ENSMUSP00000025912 ENSMUSP00000056774 ENSMUSP00000020608 ENSMUSP00000025541 ENSMUSP00000009774 ENSMUSP00000051619 ENSMUSP00000029812 ENSMUSP00000029623 ENSMUSP00000140546 ENSMUSP00000002678 ENSMUSP00000043190 ENSMUSP00000035037 ENSMUSP00000061958 ENSMUSP00000025867 …	over	0.0141859	0.181039	0.2
Human Diseases	Infectious disease: parasitic	mmu05140	Leishmaniasis	9	579	42	6012	0.015544	0.006986	ENSMUSP00000035065 ENSMUSP00000055637 ENSMUSP00000025263 ENSMUSP00000018610 ENSMUSP00000028881 ENSMUSP00000074471 ENSMUSP00000028882 ENSMUSP00000040307 ENSMUSP00000004949	ENSMUSP00000000299 ENSMUSP00000068468 ENSMUSP00000042457 ENSMUSP00000087457 ENSMUSP00000004377 ENSMUSP00000140404 ENSMUSP00000015484 ENSMUSP00000024988 ENSMUSP00000141132 ENSMUSP00000099842 ENSMUSP00000016094 ENSMUSP00000054556 ENSMUSP00000099718 ENSMUSP00000156154 ENSMUSP00000094084 ENSMUSP00000051619 ENSMUSP00000138788 ENSMUSP00000035065 ENSMUSP00000029812 ENSMUSP00000029623 ENSMUSP00000029748 …	over	0.0165114	0.196544	0.214286
Organismal Systems	Immune system	mmu04621	NOD-like receptor signaling pathway	17	579	102	6012	0.029361	0.016966	ENSMUSP00000132435 ENSMUSP00000027015 ENSMUSP00000020312 ENSMUSP00000087587 ENSMUSP00000025263 ENSMUSP00000019997 ENSMUSP00000028881 ENSMUSP00000074471 ENSMUSP00000031327 ENSMUSP00000023693 ENSMUSP00000022830 ENSMUSP00000039600 ENSMUSP00000040307 ENSMUSP00000120525 ENSMUSP00000074885 ENSMUSP00000004949 ENSMUSP00000105736	ENSMUSP00000024739 ENSMUSP00000091921 ENSMUSP00000020673 ENSMUSP00000134023 ENSMUSP00000006235 ENSMUSP00000070993 ENSMUSP00000015484 ENSMUSP00000018651 ENSMUSP00000107829 ENSMUSP00000009036 ENSMUSP00000020886 ENSMUSP00000141132 ENSMUSP00000099842 ENSMUSP00000155155 ENSMUSP00000106845 ENSMUSP00000156154 ENSMUSP00000116235 ENSMUSP00000098303 ENSMUSP00000025912 ENSMUSP00000079198 ENSMUSP00000140536 …	over	0.0168676	0.196544	0.166667
Organismal Systems	Nervous system	mmu04726	Serotonergic synapse	8	579	37	6012	0.013817	0.006154	ENSMUSP00000035065 ENSMUSP00000121127 ENSMUSP00000059977 ENSMUSP00000070868 ENSMUSP00000087485 ENSMUSP00000132180 ENSMUSP00000026211 ENSMUSP00000105736	ENSMUSP00000142326 ENSMUSP00000101241 ENSMUSP00000106656 ENSMUSP00000026013 ENSMUSP00000000001 ENSMUSP00000156154 ENSMUSP00000085179 ENSMUSP00000025912 ENSMUSP00000025541 ENSMUSP00000005606 ENSMUSP00000049584 ENSMUSP00000051619 ENSMUSP00000038150 ENSMUSP00000138788 ENSMUSP00000029445 ENSMUSP00000035065 ENSMUSP00000099573 ENSMUSP00000107339 ENSMUSP00000026572 ENSMUSP00000145346 ENSMUSP00000121127 …	over	0.0220658	0.246401	0.216216
Metabolism	Metabolism of cofactors and vitamins	mmu00830	Retinol metabolism	4	579	13	6012	0.006908	0.002162	ENSMUSP00000041175 ENSMUSP00000027053 ENSMUSP00000026211 ENSMUSP00000031741	ENSMUSP00000124066 ENSMUSP00000058683 ENSMUSP00000005964 ENSMUSP00000022821 ENSMUSP00000008579 ENSMUSP00000068568 ENSMUSP00000122552 ENSMUSP00000041175 ENSMUSP00000025656 ENSMUSP00000027053 ENSMUSP00000023214 ENSMUSP00000026211 ENSMUSP00000031741	over	0.0300618	0.312053	0.307692
Human Diseases	Infectious disease: parasitic	mmu05144	Malaria	5	579	19	6012	0.008636	0.00316	ENSMUSP00000083587 ENSMUSP00000080974 ENSMUSP00000090897 ENSMUSP00000025263 ENSMUSP00000028881	ENSMUSP00000044004 ENSMUSP00000000299 ENSMUSP00000101913 ENSMUSP00000083587 ENSMUSP00000080974 ENSMUSP00000029623 ENSMUSP00000029574 ENSMUSP00000017799 ENSMUSP00000002678 ENSMUSP00000082207 ENSMUSP00000074902 ENSMUSP00000090897 ENSMUSP00000025263 ENSMUSP00000095794 ENSMUSP00000028881 ENSMUSP00000035092 ENSMUSP00000044903 ENSMUSP00000043768 ENSMUSP00000022213	over	0.0302738	0.312053	0.263158
Organismal Systems	Endocrine system	mmu04915	Estrogen signaling pathway	10	579	55	6012	0.017271	0.009148	ENSMUSP00000007272 ENSMUSP00000079699 ENSMUSP00000099420 ENSMUSP00000007280 ENSMUSP00000007275 ENSMUSP00000007318 ENSMUSP00000007317 ENSMUSP00000018399 ENSMUSP00000099416 ENSMUSP00000105736	ENSMUSP00000024739 ENSMUSP00000015800 ENSMUSP00000020238 ENSMUSP00000091921 ENSMUSP00000121203 ENSMUSP00000142326 ENSMUSP00000007272 ENSMUSP00000079699 ENSMUSP00000107829 ENSMUSP00000019514 ENSMUSP00000099420 ENSMUSP00000032508 ENSMUSP00000000001 ENSMUSP00000156154 ENSMUSP00000130594 ENSMUSP00000085179 ENSMUSP00000025912 ENSMUSP00000056774 ENSMUSP00000079306 ENSMUSP00000102106 ENSMUSP00000025541 …	over	0.03498	0.347209	0.181818
Human Diseases	Infectious disease: bacterial	mmu05152	Tuberculosis	14	579	90	6012	0.02418	0.01497	ENSMUSP00000033053 ENSMUSP00000056669 ENSMUSP00000029900 ENSMUSP00000095171 ENSMUSP00000024932 ENSMUSP00000027966 ENSMUSP00000025263 ENSMUSP00000018610 ENSMUSP00000028881 ENSMUSP00000074471 ENSMUSP00000032239 ENSMUSP00000028882 ENSMUSP00000069850 ENSMUSP00000004949	ENSMUSP00000061493 ENSMUSP00000000299 ENSMUSP00000025217 ENSMUSP00000028045 ENSMUSP00000027123 ENSMUSP00000068468 ENSMUSP00000121203 ENSMUSP00000122474 ENSMUSP00000099399 ENSMUSP00000101972 ENSMUSP00000109230 ENSMUSP00000033053 ENSMUSP00000015667 ENSMUSP00000040756 ENSMUSP00000019514 ENSMUSP00000024988 ENSMUSP00000141132 ENSMUSP00000099842 ENSMUSP00000113852 ENSMUSP00000013304 ENSMUSP00000156154 …	over	0.0477864	0.425481	0.155556
Metabolism	Lipid metabolism	mmu00140	Steroid hormone biosynthesis	3	579	9	6012	0.005181	0.001497	ENSMUSP00000027989 ENSMUSP00000026211 ENSMUSP00000031741	ENSMUSP00000058683 ENSMUSP00000028619 ENSMUSP00000130077 ENSMUSP00000031143 ENSMUSP00000027989 ENSMUSP00000043467 ENSMUSP00000026211 ENSMUSP00000102582 ENSMUSP00000031741	over	0.0480186	0.425481	0.333333
Metabolism	Glycan biosynthesis and metabolism	mmu00603	Glycosphingolipid biosynthesis - globo and isoglobo series	2	579	4	6012	0.003454	0.000665	ENSMUSP00000026262 ENSMUSP00000154853	ENSMUSP00000026262 ENSMUSP00000022169 ENSMUSP00000023088 ENSMUSP00000154853	over	0.0487068	0.425481	0.5
Human Diseases	Immune disease	mmu05332	Graft-versus-host disease	4	579	15	6012	0.006908	0.002495	ENSMUSP00000025263 ENSMUSP00000028881 ENSMUSP00000028882 ENSMUSP00000131297	ENSMUSP00000134004 ENSMUSP00000027165 ENSMUSP00000080159 ENSMUSP00000099739 ENSMUSP00000041008 ENSMUSP00000025263 ENSMUSP00000072942 ENSMUSP00000134582 ENSMUSP00000028881 ENSMUSP00000046105 ENSMUSP00000028882 ENSMUSP00000087047 ENSMUSP00000109389 ENSMUSP00000035687 ENSMUSP00000131297	over	0.0492161	0.425481	0.266667
Organismal Systems	Immune system	mmu04620	Toll-like receptor signaling pathway	9	579	52	6012	0.015544	0.008649	ENSMUSP00000056669 ENSMUSP00000025263 ENSMUSP00000028881 ENSMUSP00000074471 ENSMUSP00000023693 ENSMUSP00000039600 ENSMUSP00000040307 ENSMUSP00000004949 ENSMUSP00000001008	ENSMUSP00000141132 ENSMUSP00000107787 ENSMUSP00000156154 ENSMUSP00000056774 ENSMUSP00000056669 ENSMUSP00000051619 ENSMUSP00000020316 ENSMUSP00000098058 ENSMUSP00000029812 ENSMUSP00000029623 ENSMUSP00000140546 ENSMUSP00000034056 ENSMUSP00000017799 ENSMUSP00000035037 ENSMUSP00000061958 ENSMUSP00000025867 ENSMUSP00000033939 ENSMUSP00000021844 ENSMUSP00000004330 ENSMUSP00000001950 ENSMUSP00000082207 …	over	0.0579478	0.485313	0.173077
Human Diseases	Immune disease	mmu05321	Inflammatory bowel disease	4	579	16	6012	0.006908	0.002661	ENSMUSP00000025263 ENSMUSP00000028881 ENSMUSP00000028882 ENSMUSP00000129001	ENSMUSP00000141132 ENSMUSP00000029812 ENSMUSP00000029623 ENSMUSP00000002678 ENSMUSP00000089708 ENSMUSP00000025867 ENSMUSP00000041008 ENSMUSP00000025263 ENSMUSP00000120152 ENSMUSP00000028881 ENSMUSP00000046105 ENSMUSP00000028882 ENSMUSP00000067704 ENSMUSP00000020188 ENSMUSP00000130115 ENSMUSP00000129001	over	0.0607981	0.493754	0.25
Metabolism	Carbohydrate metabolism	mmu00053	Ascorbate and aldarate metabolism	3	579	10	6012	0.005181	0.001663	ENSMUSP00000026613 ENSMUSP00000031103 ENSMUSP00000023832	ENSMUSP00000031411 ENSMUSP00000026613 ENSMUSP00000028004 ENSMUSP00000030455 ENSMUSP00000067767 ENSMUSP00000058683 ENSMUSP00000041260 ENSMUSP00000031103 ENSMUSP00000065089 ENSMUSP00000023832	over	0.0638219	0.503066	0.3
Human Diseases	Infectious disease: bacterial	mmu05134	Legionellosis	7	579	38	6012	0.01209	0.006321	ENSMUSP00000056669 ENSMUSP00000027015 ENSMUSP00000025263 ENSMUSP00000028881 ENSMUSP00000031327 ENSMUSP00000020653 ENSMUSP00000074885	ENSMUSP00000030164 ENSMUSP00000000299 ENSMUSP00000015800 ENSMUSP00000027123 ENSMUSP00000068468 ENSMUSP00000042457 ENSMUSP00000024988 ENSMUSP00000127330 ENSMUSP00000054556 ENSMUSP00000093955 ENSMUSP00000072859 ENSMUSP00000056669 ENSMUSP00000079306 ENSMUSP00000125291 ENSMUSP00000051814 ENSMUSP00000029476 ENSMUSP00000029812 ENSMUSP00000029623 ENSMUSP00000140546 ENSMUSP00000133815 ENSMUSP00000027015 …	over	0.0674748	0.516664	0.184211
Organismal Systems	Immune system	mmu04610	Complement and coagulation cascades	6	579	31	6012	0.010363	0.005156	ENSMUSP00000033053 ENSMUSP00000083204 ENSMUSP00000141648 ENSMUSP00000022576 ENSMUSP00000028233 ENSMUSP00000033821	ENSMUSP00000000299 ENSMUSP00000068468 ENSMUSP00000033053 ENSMUSP00000024988 ENSMUSP00000048667 ENSMUSP00000083204 ENSMUSP00000028681 ENSMUSP00000074902 ENSMUSP00000002284 ENSMUSP00000068971 ENSMUSP00000032203 ENSMUSP00000069418 ENSMUSP00000039586 ENSMUSP00000036747 ENSMUSP00000129972 ENSMUSP00000040246 ENSMUSP00000141648 ENSMUSP00000039472 ENSMUSP00000014578 ENSMUSP00000023629 ENSMUSP00000022368 …	over	0.0716785	0.533607	0.193548
Human Diseases	Endocrine and metabolic disease	mmu04940	Type I diabetes mellitus	4	579	17	6012	0.006908	0.002828	ENSMUSP00000025263 ENSMUSP00000028881 ENSMUSP00000028882 ENSMUSP00000131297	ENSMUSP00000027123 ENSMUSP00000134004 ENSMUSP00000027165 ENSMUSP00000080159 ENSMUSP00000099739 ENSMUSP00000041008 ENSMUSP00000025263 ENSMUSP00000072942 ENSMUSP00000134582 ENSMUSP00000028881 ENSMUSP00000046105 ENSMUSP00000028882 ENSMUSP00000087047 ENSMUSP00000109389 ENSMUSP00000035687 ENSMUSP00000111182 ENSMUSP00000131297	over	0.073686	0.533725	0.235294
Organismal Systems	Circulatory system	mmu04260	Cardiac muscle contraction	7	579	39	6012	0.01209	0.006487	ENSMUSP00000087736 ENSMUSP00000103546 ENSMUSP00000115419 ENSMUSP00000054856 ENSMUSP00000080993 ENSMUSP00000146960 ENSMUSP00000033582	ENSMUSP00000039657 ENSMUSP00000099922 ENSMUSP00000135935 ENSMUSP00000087736 ENSMUSP00000083077 ENSMUSP00000033176 ENSMUSP00000029549 ENSMUSP00000026743 ENSMUSP00000109325 ENSMUSP00000003575 ENSMUSP00000021142 ENSMUSP00000077273 ENSMUSP00000109326 ENSMUSP00000034276 ENSMUSP00000034983 ENSMUSP00000075150 ENSMUSP00000045284 ENSMUSP00000103546 ENSMUSP00000021993 ENSMUSP00000053145 ENSMUSP00000023210 …	over	0.0757428	0.534186	0.179487
Metabolism	Glycan biosynthesis and metabolism	mmu00512	Mucin type O-glycan biosynthesis	3	579	11	6012	0.005181	0.00183	ENSMUSP00000034458 ENSMUSP00000154853 ENSMUSP00000036240	ENSMUSP00000034021 ENSMUSP00000034458 ENSMUSP00000000430 ENSMUSP00000125315 ENSMUSP00000104844 ENSMUSP00000123848 ENSMUSP00000047931 ENSMUSP00000154853 ENSMUSP00000036240 ENSMUSP00000034260 ENSMUSP00000059224	over	0.0816802	0.553929	0.272727
		mmu04936	Alcoholic liver disease	10	579	64	6012	0.017271	0.010645	ENSMUSP00000056669 ENSMUSP00000025263 ENSMUSP00000028881 ENSMUSP00000074471 ENSMUSP00000031327 ENSMUSP00000040307 ENSMUSP00000074885 ENSMUSP00000028233 ENSMUSP00000004949 ENSMUSP00000026220	ENSMUSP00000052872 ENSMUSP00000031411 ENSMUSP00000099634 ENSMUSP00000028004 ENSMUSP00000024988 ENSMUSP00000063412 ENSMUSP00000056669 ENSMUSP00000067767 ENSMUSP00000072483 ENSMUSP00000020316 ENSMUSP00000029812 ENSMUSP00000063325 ENSMUSP00000041260 ENSMUSP00000140546 ENSMUSP00000124846 ENSMUSP00000025835 ENSMUSP00000005964 ENSMUSP00000061958 ENSMUSP00000025867 ENSMUSP00000099490 ENSMUSP00000033939 …	over	0.0838062	0.553929	0.15625
Cellular Processes	Cell growth and death	mmu04217	Necroptosis	12	579	81	6012	0.020725	0.013473	ENSMUSP00000027015 ENSMUSP00000015981 ENSMUSP00000025263 ENSMUSP00000019997 ENSMUSP00000070868 ENSMUSP00000028881 ENSMUSP00000095329 ENSMUSP00000023693 ENSMUSP00000022830 ENSMUSP00000028882 ENSMUSP00000047700 ENSMUSP00000120525	ENSMUSP00000024739 ENSMUSP00000091921 ENSMUSP00000022322 ENSMUSP00000020673 ENSMUSP00000134023 ENSMUSP00000027777 ENSMUSP00000016463 ENSMUSP00000025891 ENSMUSP00000041104 ENSMUSP00000071231 ENSMUSP00000015484 ENSMUSP00000016081 ENSMUSP00000034049 ENSMUSP00000035743 ENSMUSP00000009036 ENSMUSP00000141132 ENSMUSP00000099842 ENSMUSP00000068895 ENSMUSP00000155155 ENSMUSP00000108356 ENSMUSP00000029382 …	over	0.0858304	0.553929	0.148148
Human Diseases	Cancer: overview	mmu05204	Chemical carcinogenesis - DNA adducts	4	579	18	6012	0.006908	0.002994	ENSMUSP00000035065 ENSMUSP00000101981 ENSMUSP00000026211 ENSMUSP00000031741	ENSMUSP00000118874 ENSMUSP00000047551 ENSMUSP00000026050 ENSMUSP00000035065 ENSMUSP00000058683 ENSMUSP00000049394 ENSMUSP00000031897 ENSMUSP00000031982 ENSMUSP00000112923 ENSMUSP00000129565 ENSMUSP00000001715 ENSMUSP00000028005 ENSMUSP00000004134 ENSMUSP00000091181 ENSMUSP00000029489 ENSMUSP00000101981 ENSMUSP00000026211 ENSMUSP00000031741	over	0.0878345	0.553929	0.222222
Human Diseases	Infectious disease: viral	mmu05164	Influenza A	13	579	90	6012	0.022453	0.01497	ENSMUSP00000071486 ENSMUSP00000083587 ENSMUSP00000028259 ENSMUSP00000027015 ENSMUSP00000020970 ENSMUSP00000025263 ENSMUSP00000028881 ENSMUSP00000074471 ENSMUSP00000023693 ENSMUSP00000039600 ENSMUSP00000028882 ENSMUSP00000120525 ENSMUSP00000031931	ENSMUSP00000071486 ENSMUSP00000020673 ENSMUSP00000016463 ENSMUSP00000034049 ENSMUSP00000099933 ENSMUSP00000148115 ENSMUSP00000141132 ENSMUSP00000071214 ENSMUSP00000099842 ENSMUSP00000107787 ENSMUSP00000083587 ENSMUSP00000028259 ENSMUSP00000156154 ENSMUSP00000022734 ENSMUSP00000110021 ENSMUSP00000056774 ENSMUSP00000129163 ENSMUSP00000079198 ENSMUSP00000010241 ENSMUSP00000125291 ENSMUSP00000042433 …	over	0.0888766	0.553929	0.144444
Human Diseases	Cardiovascular disease	mmu05418	Fluid shear stress and atherosclerosis	10	579	65	6012	0.017271	0.010812	ENSMUSP00000071486 ENSMUSP00000083587 ENSMUSP00000015981 ENSMUSP00000025263 ENSMUSP00000115044 ENSMUSP00000028881 ENSMUSP00000028882 ENSMUSP00000017153 ENSMUSP00000040307 ENSMUSP00000007799	ENSMUSP00000071486 ENSMUSP00000024739 ENSMUSP00000020238 ENSMUSP00000091921 ENSMUSP00000028499 ENSMUSP00000140404 ENSMUSP00000019514 ENSMUSP00000016094 ENSMUSP00000118874 ENSMUSP00000083587 ENSMUSP00000026050 ENSMUSP00000135168 ENSMUSP00000056774 ENSMUSP00000152169 ENSMUSP00000007959 ENSMUSP00000098058 ENSMUSP00000021028 ENSMUSP00000029812 ENSMUSP00000029574 ENSMUSP00000005548 ENSMUSP00000035037 …	over	0.0909752	0.554122	0.153846
Organismal Systems	Environmental adaptation	mmu04713	Circadian entrainment	5	579	26	6012	0.008636	0.004325	ENSMUSP00000121127 ENSMUSP00000087485 ENSMUSP00000042987 ENSMUSP00000099617 ENSMUSP00000105736	ENSMUSP00000142326 ENSMUSP00000019514 ENSMUSP00000101241 ENSMUSP00000106656 ENSMUSP00000000001 ENSMUSP00000156154 ENSMUSP00000130594 ENSMUSP00000085179 ENSMUSP00000025912 ENSMUSP00000025541 ENSMUSP00000005606 ENSMUSP00000051619 ENSMUSP00000038150 ENSMUSP00000138788 ENSMUSP00000099573 ENSMUSP00000129999 ENSMUSP00000145346 ENSMUSP00000121127 ENSMUSP00000125697 ENSMUSP00000099583 ENSMUSP00000087485 …	over	0.0985113	0.586689	0.192308
Human Diseases	Cancer: specific types	mmu05222	Small cell lung cancer	6	579	34	6012	0.010363	0.005655	ENSMUSP00000054499 ENSMUSP00000035065 ENSMUSP00000018610 ENSMUSP00000094225 ENSMUSP00000130759 ENSMUSP00000004949	ENSMUSP00000028499 ENSMUSP00000054499 ENSMUSP00000087457 ENSMUSP00000056774 ENSMUSP00000125291 ENSMUSP00000035065 ENSMUSP00000029812 ENSMUSP00000033093 ENSMUSP00000035037 ENSMUSP00000025867 ENSMUSP00000126024 ENSMUSP00000033939 ENSMUSP00000004330 ENSMUSP00000018610 ENSMUSP00000101315 ENSMUSP00000147767 ENSMUSP00000077757 ENSMUSP00000026416 ENSMUSP00000103878 ENSMUSP00000007803 ENSMUSP00000106025 …	over	0.102888	0.597358	0.176471
Metabolism	Glycan biosynthesis and metabolism	mmu00604	Glycosphingolipid biosynthesis - ganglio series	2	579	6	6012	0.003454	0.000998	ENSMUSP00000026262 ENSMUSP00000154853	ENSMUSP00000026262 ENSMUSP00000022169 ENSMUSP00000055803 ENSMUSP00000123986 ENSMUSP00000006914 ENSMUSP00000154853	over	0.106989	0.597358	0.333333
Genetic Information Processing	Folding, sorting and degradation	mmu04122	Sulfur relay system	2	579	6	6012	0.003454	0.000998	ENSMUSP00000096670 ENSMUSP00000088676	ENSMUSP00000029147 ENSMUSP00000043061 ENSMUSP00000055743 ENSMUSP00000096670 ENSMUSP00000088676 ENSMUSP00000112113	over	0.106989	0.597358	0.333333
Human Diseases	Endocrine and metabolic disease	mmu04933	AGE-RAGE signaling pathway in diabetic complications	8	579	51	6012	0.013817	0.008483	ENSMUSP00000054499 ENSMUSP00000083587 ENSMUSP00000025263 ENSMUSP00000028881 ENSMUSP00000028882 ENSMUSP00000129001 ENSMUSP00000015596 ENSMUSP00000105736	ENSMUSP00000079991 ENSMUSP00000054499 ENSMUSP00000025337 ENSMUSP00000015484 ENSMUSP00000107829 ENSMUSP00000141132 ENSMUSP00000083587 ENSMUSP00000156154 ENSMUSP00000025912 ENSMUSP00000056774 ENSMUSP00000054634 ENSMUSP00000051619 ENSMUSP00000102980 ENSMUSP00000138788 ENSMUSP00000102981 ENSMUSP00000029445 ENSMUSP00000098058 ENSMUSP00000029812 ENSMUSP00000029574 ENSMUSP00000033093 ENSMUSP00000002678 …	over	0.112563	0.614495	0.156863
Organismal Systems	Sensory system	mmu04750	Inflammatory mediator regulation of TRP channels	6	579	35	6012	0.010363	0.005822	ENSMUSP00000083474 ENSMUSP00000070868 ENSMUSP00000028881 ENSMUSP00000132180 ENSMUSP00000026211 ENSMUSP00000105736	ENSMUSP00000079991 ENSMUSP00000018651 ENSMUSP00000107829 ENSMUSP00000019514 ENSMUSP00000039109 ENSMUSP00000083474 ENSMUSP00000130594 ENSMUSP00000085179 ENSMUSP00000025912 ENSMUSP00000056774 ENSMUSP00000025541 ENSMUSP00000015100 ENSMUSP00000005606 ENSMUSP00000049584 ENSMUSP00000038150 ENSMUSP00000138788 ENSMUSP00000099573 ENSMUSP00000129999 ENSMUSP00000035037 ENSMUSP00000061958 ENSMUSP00000101315 …	over	0.114645	0.614495	0.171429
Human Diseases	Infectious disease: viral	mmu05171	Coronavirus disease - COVID-19	18	579	140	6012	0.031088	0.023287	ENSMUSP00000028259 ENSMUSP00000027015 ENSMUSP00000003521 ENSMUSP00000025263 ENSMUSP00000106250 ENSMUSP00000028881 ENSMUSP00000117834 ENSMUSP00000069004 ENSMUSP00000074471 ENSMUSP00000082548 ENSMUSP00000023693 ENSMUSP00000141648 ENSMUSP00000131489 ENSMUSP00000102213 ENSMUSP00000040307 ENSMUSP00000120525 ENSMUSP00000028233 ENSMUSP00000004949	ENSMUSP00000079991 ENSMUSP00000080354 ENSMUSP00000034966 ENSMUSP00000015484 ENSMUSP00000032998 ENSMUSP00000024988 ENSMUSP00000141132 ENSMUSP00000099842 ENSMUSP00000029722 ENSMUSP00000113852 ENSMUSP00000099962 ENSMUSP00000107787 ENSMUSP00000092502 ENSMUSP00000048667 ENSMUSP00000028259 ENSMUSP00000156154 ENSMUSP00000031617 ENSMUSP00000033683 ENSMUSP00000071616 ENSMUSP00000083705 ENSMUSP00000080854 …	over	0.124063	0.651941	0.128571
Human Diseases	Infectious disease: parasitic	mmu05145	Toxoplasmosis	8	579	53	6012	0.013817	0.008816	ENSMUSP00000025263 ENSMUSP00000047356 ENSMUSP00000018610 ENSMUSP00000074471 ENSMUSP00000022419 ENSMUSP00000034713 ENSMUSP00000040307 ENSMUSP00000004949	ENSMUSP00000015800 ENSMUSP00000087457 ENSMUSP00000142326 ENSMUSP00000141132 ENSMUSP00000099842 ENSMUSP00000000001 ENSMUSP00000156154 ENSMUSP00000079306 ENSMUSP00000050446 ENSMUSP00000051619 ENSMUSP00000029812 ENSMUSP00000029623 ENSMUSP00000140546 ENSMUSP00000133815 ENSMUSP00000017799 ENSMUSP00000002678 ENSMUSP00000061958 ENSMUSP00000025867 ENSMUSP00000033939 ENSMUSP00000123539 ENSMUSP00000004330 …	over	0.132868	0.671862	0.150943
Human Diseases	Cancer: overview	mmu05202	Transcriptional misregulation in cancer	8	579	53	6012	0.013817	0.008816	ENSMUSP00000056669 ENSMUSP00000025523 ENSMUSP00000110102 ENSMUSP00000034026 ENSMUSP00000028071 ENSMUSP00000069850 ENSMUSP00000130759 ENSMUSP00000018645	ENSMUSP00000068468 ENSMUSP00000021062 ENSMUSP00000020779 ENSMUSP00000056669 ENSMUSP00000101858 ENSMUSP00000099657 ENSMUSP00000025523 ENSMUSP00000072556 ENSMUSP00000029812 ENSMUSP00000130221 ENSMUSP00000029748 ENSMUSP00000017799 ENSMUSP00000151536 ENSMUSP00000033093 ENSMUSP00000124509 ENSMUSP00000099928 ENSMUSP00000025867 ENSMUSP00000001592 ENSMUSP00000110102 ENSMUSP00000019911 ENSMUSP00000099994 …	over	0.132868	0.671862	0.150943
Metabolism	Glycan biosynthesis and metabolism	mmu00531	Glycosaminoglycan degradation	3	579	14	6012	0.005181	0.002329	ENSMUSP00000026262 ENSMUSP00000026613 ENSMUSP00000005173	ENSMUSP00000026262 ENSMUSP00000026613 ENSMUSP00000001802 ENSMUSP00000022169 ENSMUSP00000043167 ENSMUSP00000055803 ENSMUSP00000015171 ENSMUSP00000088964 ENSMUSP00000044072 ENSMUSP00000005173 ENSMUSP00000040356 ENSMUSP00000071577 ENSMUSP00000099046 ENSMUSP00000010195	over	0.145685	0.697533	0.214286
Organismal Systems	Digestive system	mmu04975	Fat digestion and absorption	3	579	14	6012	0.005181	0.002329	ENSMUSP00000080974 ENSMUSP00000065719 ENSMUSP00000064423	ENSMUSP00000034097 ENSMUSP00000034547 ENSMUSP00000030010 ENSMUSP00000078971 ENSMUSP00000080974 ENSMUSP00000148768 ENSMUSP00000007005 ENSMUSP00000036044 ENSMUSP00000048573 ENSMUSP00000065719 ENSMUSP00000023214 ENSMUSP00000069670 ENSMUSP00000064423 ENSMUSP00000028286	over	0.145685	0.697533	0.214286
Environmental Information Processing	Signal transduction	mmu04010	MAPK signaling pathway	14	579	107	6012	0.02418	0.017798	ENSMUSP00000056669 ENSMUSP00000025523 ENSMUSP00000030636 ENSMUSP00000025263 ENSMUSP00000070868 ENSMUSP00000126961 ENSMUSP00000028881 ENSMUSP00000074471 ENSMUSP00000028882 ENSMUSP00000040307 ENSMUSP00000042987 ENSMUSP00000004949 ENSMUSP00000086459 ENSMUSP00000129001	ENSMUSP00000109938 ENSMUSP00000015800 ENSMUSP00000052020 ENSMUSP00000033671 ENSMUSP00000107609 ENSMUSP00000119328 ENSMUSP00000156154 ENSMUSP00000072859 ENSMUSP00000054634 ENSMUSP00000056669 ENSMUSP00000079306 ENSMUSP00000102106 ENSMUSP00000005606 ENSMUSP00000025523 ENSMUSP00000051619 ENSMUSP00000071040 ENSMUSP00000066238 ENSMUSP00000023467 ENSMUSP00000138788 ENSMUSP00000088174 ENSMUSP00000029445 …	over	0.145753	0.697533	0.130841
Organismal Systems	Immune system	mmu04622	RIG-I-like receptor signaling pathway	5	579	30	6012	0.008636	0.00499	ENSMUSP00000028259 ENSMUSP00000025263 ENSMUSP00000082548 ENSMUSP00000040307 ENSMUSP00000004949	ENSMUSP00000000804 ENSMUSP00000028259 ENSMUSP00000042433 ENSMUSP00000020316 ENSMUSP00000029812 ENSMUSP00000140546 ENSMUSP00000017974 ENSMUSP00000034621 ENSMUSP00000061958 ENSMUSP00000025867 ENSMUSP00000033939 ENSMUSP00000021844 ENSMUSP00000004330 ENSMUSP00000103528 ENSMUSP00000025263 ENSMUSP00000044769 ENSMUSP00000003284 ENSMUSP00000054126 ENSMUSP00000082548 ENSMUSP00000034359 ENSMUSP00000020634 …	over	0.156553	0.736074	0.166667
Organismal Systems	Excretory system	mmu04966	Collecting duct acid secretion	3	579	15	6012	0.005181	0.002495	ENSMUSP00000029900 ENSMUSP00000024932 ENSMUSP00000048770	ENSMUSP00000110314 ENSMUSP00000006435 ENSMUSP00000122474 ENSMUSP00000099399 ENSMUSP00000022904 ENSMUSP00000019354 ENSMUSP00000013304 ENSMUSP00000029900 ENSMUSP00000017900 ENSMUSP00000021536 ENSMUSP00000039737 ENSMUSP00000024932 ENSMUSP00000004396 ENSMUSP00000048770 ENSMUSP00000069482	over	0.169802	0.784603	0.2
Human Diseases	Neurodegenerative disease	mmu05010	Alzheimer disease	27	579	235	6012	0.046632	0.039088	ENSMUSP00000078429 ENSMUSP00000133302 ENSMUSP00000099907 ENSMUSP00000035065 ENSMUSP00000020312 ENSMUSP00000025263 ENSMUSP00000018610 ENSMUSP00000028881 ENSMUSP00000022419 ENSMUSP00000115419 ENSMUSP00000000175 ENSMUSP00000126067 ENSMUSP00000028882 ENSMUSP00000054856 ENSMUSP00000045201 ENSMUSP00000066303 ENSMUSP00000080998 ENSMUSP00000016396 ENSMUSP00000058629 ENSMUSP00000146675 ENSMUSP00000080993 …	ENSMUSP00000044004 ENSMUSP00000026495 ENSMUSP00000026459 ENSMUSP00000135935 ENSMUSP00000022062 ENSMUSP00000027111 ENSMUSP00000113942 ENSMUSP00000025083 ENSMUSP00000020673 ENSMUSP00000134023 ENSMUSP00000076777 ENSMUSP00000071054 ENSMUSP00000016463 ENSMUSP00000027432 ENSMUSP00000033176 ENSMUSP00000051033 ENSMUSP00000025891 ENSMUSP00000078429 ENSMUSP00000015484 ENSMUSP00000007212 ENSMUSP00000001566 …	over	0.189503	0.83011	0.114894
Human Diseases	Infectious disease: viral	mmu05162	Measles	10	579	76	6012	0.017271	0.012641	ENSMUSP00000028259 ENSMUSP00000027966 ENSMUSP00000019997 ENSMUSP00000028881 ENSMUSP00000074471 ENSMUSP00000023693 ENSMUSP00000028882 ENSMUSP00000040307 ENSMUSP00000120525 ENSMUSP00000004949	ENSMUSP00000113071 ENSMUSP00000015800 ENSMUSP00000141132 ENSMUSP00000071214 ENSMUSP00000099842 ENSMUSP00000020640 ENSMUSP00000107787 ENSMUSP00000028259 ENSMUSP00000056774 ENSMUSP00000079306 ENSMUSP00000079198 ENSMUSP00000125291 ENSMUSP00000042433 ENSMUSP00000022925 ENSMUSP00000102980 ENSMUSP00000020316 ENSMUSP00000102981 ENSMUSP00000100872 ENSMUSP00000029812 ENSMUSP00000029623 ENSMUSP00000096829 …	over	0.192391	0.83011	0.131579
Metabolism	Lipid metabolism	mmu01040	Biosynthesis of unsaturated fatty acids	3	579	16	6012	0.005181	0.002661	ENSMUSP00000060462 ENSMUSP00000006557 ENSMUSP00000026220	ENSMUSP00000042351 ENSMUSP00000025385 ENSMUSP00000030340 ENSMUSP00000063412 ENSMUSP00000019382 ENSMUSP00000063325 ENSMUSP00000028619 ENSMUSP00000021649 ENSMUSP00000126448 ENSMUSP00000044955 ENSMUSP00000129121 ENSMUSP00000060462 ENSMUSP00000010807 ENSMUSP00000034904 ENSMUSP00000006557 ENSMUSP00000026220	over	0.194957	0.83011	0.1875
Organismal Systems	Digestive system	mmu04974	Protein digestion and absorption	4	579	24	6012	0.006908	0.003992	ENSMUSP00000022787 ENSMUSP00000022576 ENSMUSP00000044050 ENSMUSP00000031931	ENSMUSP00000039657 ENSMUSP00000099922 ENSMUSP00000083077 ENSMUSP00000130194 ENSMUSP00000034983 ENSMUSP00000075429 ENSMUSP00000022787 ENSMUSP00000001547 ENSMUSP00000031668 ENSMUSP00000126373 ENSMUSP00000090227 ENSMUSP00000001147 ENSMUSP00000000984 ENSMUSP00000108553 ENSMUSP00000023099 ENSMUSP00000071976 ENSMUSP00000022576 ENSMUSP00000033899 ENSMUSP00000044050 ENSMUSP00000031931 ENSMUSP00000104136 …	over	0.195138	0.83011	0.166667
Organismal Systems	Digestive system	mmu04979	Cholesterol metabolism	4	579	24	6012	0.006908	0.003992	ENSMUSP00000133302 ENSMUSP00000080974 ENSMUSP00000034713 ENSMUSP00000000049	ENSMUSP00000044004 ENSMUSP00000020673 ENSMUSP00000134023 ENSMUSP00000030986 ENSMUSP00000009036 ENSMUSP00000133302 ENSMUSP00000045864 ENSMUSP00000025279 ENSMUSP00000030010 ENSMUSP00000024897 ENSMUSP00000080974 ENSMUSP00000064699 ENSMUSP00000140721 ENSMUSP00000021668 ENSMUSP00000136967 ENSMUSP00000027356 ENSMUSP00000036749 ENSMUSP00000018311 ENSMUSP00000015712 ENSMUSP00000034713 ENSMUSP00000036044 …	over	0.195138	0.83011	0.166667
Organismal Systems	Nervous system	mmu04721	Synaptic vesicle cycle	5	579	33	6012	0.008636	0.005489	ENSMUSP00000029900 ENSMUSP00000024932 ENSMUSP00000089051 ENSMUSP00000048770 ENSMUSP00000038502	ENSMUSP00000050220 ENSMUSP00000110314 ENSMUSP00000127842 ENSMUSP00000018875 ENSMUSP00000003038 ENSMUSP00000006435 ENSMUSP00000099364 ENSMUSP00000122474 ENSMUSP00000099399 ENSMUSP00000072199 ENSMUSP00000006181 ENSMUSP00000040756 ENSMUSP00000007216 ENSMUSP00000022904 ENSMUSP00000019354 ENSMUSP00000013304 ENSMUSP00000029900 ENSMUSP00000103478 ENSMUSP00000021536 ENSMUSP00000031378 ENSMUSP00000039737 …	over	0.20732	0.868153	0.151515
Organismal Systems	Immune system	mmu04612	Antigen processing and presentation	5	579	34	6012	0.008636	0.005655	ENSMUSP00000095171 ENSMUSP00000025263 ENSMUSP00000019470 ENSMUSP00000099534 ENSMUSP00000131297	ENSMUSP00000028222 ENSMUSP00000024739 ENSMUSP00000015800 ENSMUSP00000020630 ENSMUSP00000091921 ENSMUSP00000028683 ENSMUSP00000020637 ENSMUSP00000003912 ENSMUSP00000006235 ENSMUSP00000015667 ENSMUSP00000134735 ENSMUSP00000025161 ENSMUSP00000134004 ENSMUSP00000128401 ENSMUSP00000079306 ENSMUSP00000152169 ENSMUSP00000100564 ENSMUSP00000025197 ENSMUSP00000133815 ENSMUSP00000095171 ENSMUSP00000105647 …	over	0.225326	0.929034	0.147059
Organismal Systems	Immune system	mmu04625	C-type lectin receptor signaling pathway	8	579	62	6012	0.013817	0.010313	ENSMUSP00000035065 ENSMUSP00000027015 ENSMUSP00000025263 ENSMUSP00000028881 ENSMUSP00000032239 ENSMUSP00000120525 ENSMUSP00000104548 ENSMUSP00000129001	ENSMUSP00000079991 ENSMUSP00000107829 ENSMUSP00000019514 ENSMUSP00000141132 ENSMUSP00000113852 ENSMUSP00000156154 ENSMUSP00000072859 ENSMUSP00000056774 ENSMUSP00000007959 ENSMUSP00000049584 ENSMUSP00000051619 ENSMUSP00000071040 ENSMUSP00000038150 ENSMUSP00000029445 ENSMUSP00000100872 ENSMUSP00000101588 ENSMUSP00000035065 ENSMUSP00000029812 ENSMUSP00000140546 ENSMUSP00000027015 ENSMUSP00000058757 …	over	0.243782	0.986441	0.129032
Human Diseases	Cancer: specific types	mmu05217	Basal cell carcinoma	2	579	10	6012	0.003454	0.001663	ENSMUSP00000058629 ENSMUSP00000109884	ENSMUSP00000033093 ENSMUSP00000110398 ENSMUSP00000077757 ENSMUSP00000058629 ENSMUSP00000073974 ENSMUSP00000007130 ENSMUSP00000109884 ENSMUSP00000100996 ENSMUSP00000064333 ENSMUSP00000078337	over	0.249585	0.986441	0.2
Human Diseases	Infectious disease: viral	mmu05160	Hepatitis C	10	579	81	6012	0.017271	0.013473	ENSMUSP00000099888 ENSMUSP00000020970 ENSMUSP00000025263 ENSMUSP00000093816 ENSMUSP00000019470 ENSMUSP00000095329 ENSMUSP00000023693 ENSMUSP00000034713 ENSMUSP00000120525 ENSMUSP00000004949	ENSMUSP00000070993 ENSMUSP00000022894 ENSMUSP00000019109 ENSMUSP00000123605 ENSMUSP00000099888 ENSMUSP00000141132 ENSMUSP00000071214 ENSMUSP00000099842 ENSMUSP00000007708 ENSMUSP00000018470 ENSMUSP00000022960 ENSMUSP00000143631 ENSMUSP00000156154 ENSMUSP00000056774 ENSMUSP00000020608 ENSMUSP00000079198 ENSMUSP00000102106 ENSMUSP00000125291 ENSMUSP00000009774 ENSMUSP00000042433 ENSMUSP00000051619 …	over	0.250291	0.986441	0.123457
Metabolism	Lipid metabolism	mmu00564	Glycerophospholipid metabolism	6	579	45	6012	0.010363	0.007485	ENSMUSP00000067002 ENSMUSP00000070868 ENSMUSP00000022099 ENSMUSP00000065719 ENSMUSP00000021990 ENSMUSP00000064423	ENSMUSP00000028167 ENSMUSP00000067002 ENSMUSP00000044078 ENSMUSP00000113820 ENSMUSP00000034377 ENSMUSP00000106934 ENSMUSP00000037107 ENSMUSP00000049252 ENSMUSP00000117509 ENSMUSP00000001240 ENSMUSP00000078721 ENSMUSP00000121973 ENSMUSP00000099470 ENSMUSP00000024594 ENSMUSP00000068690 ENSMUSP00000070868 ENSMUSP00000118727 ENSMUSP00000004381 ENSMUSP00000034466 ENSMUSP00000023289 ENSMUSP00000101478 …	over	0.262539	0.997991	0.133333
Organismal Systems	Environmental adaptation	mmu04714	Thermogenesis	17	579	149	6012	0.029361	0.024784	ENSMUSP00000071486 ENSMUSP00000109211 ENSMUSP00000086094 ENSMUSP00000115419 ENSMUSP00000000175 ENSMUSP00000024887 ENSMUSP00000054856 ENSMUSP00000066303 ENSMUSP00000080998 ENSMUSP00000016396 ENSMUSP00000017332 ENSMUSP00000023761 ENSMUSP00000080993 ENSMUSP00000154338 ENSMUSP00000146960 ENSMUSP00000033582 ENSMUSP00000053727	ENSMUSP00000071486 ENSMUSP00000026495 ENSMUSP00000026459 ENSMUSP00000022062 ENSMUSP00000027111 ENSMUSP00000096547 ENSMUSP00000033176 ENSMUSP00000100868 ENSMUSP00000034046 ENSMUSP00000108528 ENSMUSP00000033671 ENSMUSP00000026743 ENSMUSP00000046585 ENSMUSP00000042967 ENSMUSP00000010007 ENSMUSP00000119328 ENSMUSP00000027478 ENSMUSP00000034276 ENSMUSP00000110547 ENSMUSP00000113022 ENSMUSP00000102147 …	over	0.265194	0.997991	0.114094
Metabolism	Glycan biosynthesis and metabolism	mmu00514	Other types of O-glycan biosynthesis	3	579	19	6012	0.005181	0.00316	ENSMUSP00000034458 ENSMUSP00000004968 ENSMUSP00000036240	ENSMUSP00000034021 ENSMUSP00000034458 ENSMUSP00000004968 ENSMUSP00000045409 ENSMUSP00000038166 ENSMUSP00000047923 ENSMUSP00000000430 ENSMUSP00000125315 ENSMUSP00000020493 ENSMUSP00000097972 ENSMUSP00000053122 ENSMUSP00000061610 ENSMUSP00000050246 ENSMUSP00000123848 ENSMUSP00000081947 ENSMUSP00000047931 ENSMUSP00000030121 ENSMUSP00000036240 ENSMUSP00000059224	over	0.274637	0.997991	0.157895
Organismal Systems	Sensory system	mmu04740	Olfactory transduction	3	579	19	6012	0.005181	0.00316	ENSMUSP00000149022 ENSMUSP00000150761 ENSMUSP00000143864	ENSMUSP00000019514 ENSMUSP00000101241 ENSMUSP00000005606 ENSMUSP00000099573 ENSMUSP00000136963 ENSMUSP00000086114 ENSMUSP00000129999 ENSMUSP00000104208 ENSMUSP00000126373 ENSMUSP00000081956 ENSMUSP00000073268 ENSMUSP00000149022 ENSMUSP00000150162 ENSMUSP00000150761 ENSMUSP00000149479 ENSMUSP00000149674 ENSMUSP00000151882 ENSMUSP00000150203 ENSMUSP00000143864	over	0.274637	0.997991	0.157895
Metabolism	Energy metabolism	mmu00190	Oxidative phosphorylation	12	579	102	6012	0.020725	0.016966	ENSMUSP00000029900 ENSMUSP00000024932 ENSMUSP00000048770 ENSMUSP00000115419 ENSMUSP00000000175 ENSMUSP00000054856 ENSMUSP00000066303 ENSMUSP00000080998 ENSMUSP00000016396 ENSMUSP00000080993 ENSMUSP00000146960 ENSMUSP00000033582	ENSMUSP00000026495 ENSMUSP00000026459 ENSMUSP00000110314 ENSMUSP00000022062 ENSMUSP00000027111 ENSMUSP00000006435 ENSMUSP00000122474 ENSMUSP00000099399 ENSMUSP00000033176 ENSMUSP00000040756 ENSMUSP00000026743 ENSMUSP00000042967 ENSMUSP00000010007 ENSMUSP00000027478 ENSMUSP00000022904 ENSMUSP00000034276 ENSMUSP00000110547 ENSMUSP00000113022 ENSMUSP00000019354 ENSMUSP00000013304 ENSMUSP00000102147 …	over	0.275148	0.997991	0.117647
Human Diseases	Cardiovascular disease	mmu05410	Hypertrophic cardiomyopathy	4	579	28	6012	0.006908	0.004657	ENSMUSP00000071486 ENSMUSP00000087736 ENSMUSP00000103546 ENSMUSP00000025263	ENSMUSP00000071486 ENSMUSP00000029699 ENSMUSP00000135935 ENSMUSP00000028499 ENSMUSP00000087736 ENSMUSP00000087457 ENSMUSP00000029549 ENSMUSP00000110680 ENSMUSP00000023128 ENSMUSP00000109325 ENSMUSP00000003575 ENSMUSP00000021142 ENSMUSP00000109326 ENSMUSP00000099718 ENSMUSP00000021028 ENSMUSP00000002678 ENSMUSP00000103546 ENSMUSP00000025263 ENSMUSP00000132499 ENSMUSP00000063166 ENSMUSP00000126373 …	over	0.281261	0.997991	0.142857
Cellular Processes	Transport and catabolism	mmu04145	Phagosome	11	579	93	6012	0.018998	0.015469	ENSMUSP00000071486 ENSMUSP00000078429 ENSMUSP00000056669 ENSMUSP00000080974 ENSMUSP00000029900 ENSMUSP00000024932 ENSMUSP00000027966 ENSMUSP00000048770 ENSMUSP00000027639 ENSMUSP00000131297 ENSMUSP00000099617	ENSMUSP00000018851 ENSMUSP00000061493 ENSMUSP00000071486 ENSMUSP00000000299 ENSMUSP00000028045 ENSMUSP00000110314 ENSMUSP00000028499 ENSMUSP00000068468 ENSMUSP00000020637 ENSMUSP00000003912 ENSMUSP00000006435 ENSMUSP00000122474 ENSMUSP00000087457 ENSMUSP00000076777 ENSMUSP00000023486 ENSMUSP00000099399 ENSMUSP00000140404 ENSMUSP00000101972 ENSMUSP00000051033 ENSMUSP00000109230 ENSMUSP00000078429 …	over	0.281289	0.997991	0.11828
Environmental Information Processing	Signal transduction	mmu04310	Wnt signaling pathway	6	579	47	6012	0.010363	0.007818	ENSMUSP00000058629 ENSMUSP00000040307 ENSMUSP00000000769 ENSMUSP00000109884 ENSMUSP00000129001 ENSMUSP00000105736	ENSMUSP00000152813 ENSMUSP00000031697 ENSMUSP00000032165 ENSMUSP00000025912 ENSMUSP00000142184 ENSMUSP00000085549 ENSMUSP00000005606 ENSMUSP00000007959 ENSMUSP00000071040 ENSMUSP00000138788 ENSMUSP00000098058 ENSMUSP00000099573 ENSMUSP00000096829 ENSMUSP00000078682 ENSMUSP00000129999 ENSMUSP00000130294 ENSMUSP00000055919 ENSMUSP00000110398 ENSMUSP00000038744 ENSMUSP00000048363 ENSMUSP00000125722 …	over	0.296819	0.997991	0.12766
Organismal Systems	Nervous system	mmu04723	Retrograde endocannabinoid signaling	8	579	66	6012	0.013817	0.010978	ENSMUSP00000043088 ENSMUSP00000035065 ENSMUSP00000109211 ENSMUSP00000121127 ENSMUSP00000087485 ENSMUSP00000066303 ENSMUSP00000080998 ENSMUSP00000105736	ENSMUSP00000027111 ENSMUSP00000142326 ENSMUSP00000101241 ENSMUSP00000106656 ENSMUSP00000042967 ENSMUSP00000027478 ENSMUSP00000000001 ENSMUSP00000156154 ENSMUSP00000043088 ENSMUSP00000130594 ENSMUSP00000025912 ENSMUSP00000144904 ENSMUSP00000025541 ENSMUSP00000005606 ENSMUSP00000013737 ENSMUSP00000049584 ENSMUSP00000051619 ENSMUSP00000038150 ENSMUSP00000138788 ENSMUSP00000035065 ENSMUSP00000099573 …	over	0.300778	0.997991	0.121212
Human Diseases	Cardiovascular disease	mmu05414	Dilated cardiomyopathy	4	579	29	6012	0.006908	0.004824	ENSMUSP00000071486 ENSMUSP00000087736 ENSMUSP00000103546 ENSMUSP00000025263	ENSMUSP00000071486 ENSMUSP00000029699 ENSMUSP00000135935 ENSMUSP00000028499 ENSMUSP00000087736 ENSMUSP00000087457 ENSMUSP00000029549 ENSMUSP00000110680 ENSMUSP00000023128 ENSMUSP00000109325 ENSMUSP00000003575 ENSMUSP00000021142 ENSMUSP00000109326 ENSMUSP00000099718 ENSMUSP00000130594 ENSMUSP00000085179 ENSMUSP00000005606 ENSMUSP00000021028 ENSMUSP00000099573 ENSMUSP00000002678 ENSMUSP00000103546 …	over	0.303718	0.997991	0.137931
Environmental Information Processing	Signaling molecules and interaction	mmu04514	Cell adhesion molecules	5	579	39	6012	0.008636	0.006487	ENSMUSP00000083587 ENSMUSP00000016640 ENSMUSP00000122787 ENSMUSP00000017153 ENSMUSP00000131297	ENSMUSP00000028794 ENSMUSP00000000299 ENSMUSP00000138350 ENSMUSP00000028499 ENSMUSP00000131355 ENSMUSP00000068468 ENSMUSP00000087457 ENSMUSP00000101913 ENSMUSP00000023312 ENSMUSP00000083587 ENSMUSP00000099718 ENSMUSP00000134004 ENSMUSP00000029574 ENSMUSP00000124119 ENSMUSP00000017799 ENSMUSP00000027165 ENSMUSP00000019248 ENSMUSP00000080159 ENSMUSP00000099739 ENSMUSP00000041008 ENSMUSP00000072942 …	over	0.320753	0.997991	0.128205
Metabolism	Amino acid metabolism	mmu00220	Arginine biosynthesis	2	579	12	6012	0.003454	0.001996	ENSMUSP00000018610 ENSMUSP00000099617	ENSMUSP00000022322 ENSMUSP00000034097 ENSMUSP00000026196 ENSMUSP00000110158 ENSMUSP00000110155 ENSMUSP00000021550 ENSMUSP00000124274 ENSMUSP00000018610 ENSMUSP00000083375 ENSMUSP00000099904 ENSMUSP00000020161 ENSMUSP00000099617	over	0.323995	0.997991	0.166667
Metabolism	Lipid metabolism	mmu00600	Sphingolipid metabolism	4	579	30	6012	0.006908	0.00499	ENSMUSP00000026262 ENSMUSP00000127646 ENSMUSP00000065719 ENSMUSP00000064423	ENSMUSP00000101105 ENSMUSP00000112975 ENSMUSP00000026262 ENSMUSP00000022169 ENSMUSP00000034000 ENSMUSP00000076589 ENSMUSP00000055803 ENSMUSP00000021424 ENSMUSP00000021390 ENSMUSP00000007253 ENSMUSP00000006053 ENSMUSP00000021920 ENSMUSP00000127646 ENSMUSP00000019965 ENSMUSP00000103366 ENSMUSP00000006914 ENSMUSP00000135604 ENSMUSP00000015858 ENSMUSP00000042187 ENSMUSP00000010049 ENSMUSP00000104844 …	over	0.326359	0.997991	0.133333
Organismal Systems	Endocrine system	mmu04916	Melanogenesis	4	579	30	6012	0.006908	0.00499	ENSMUSP00000122157 ENSMUSP00000058629 ENSMUSP00000109884 ENSMUSP00000105736	ENSMUSP00000142326 ENSMUSP00000019514 ENSMUSP00000000001 ENSMUSP00000156154 ENSMUSP00000130594 ENSMUSP00000085179 ENSMUSP00000025912 ENSMUSP00000025541 ENSMUSP00000005606 ENSMUSP00000051619 ENSMUSP00000138788 ENSMUSP00000029445 ENSMUSP00000099573 ENSMUSP00000129999 ENSMUSP00000107339 ENSMUSP00000026572 ENSMUSP00000110398 ENSMUSP00000023165 ENSMUSP00000005066 ENSMUSP00000066789 ENSMUSP00000108571 …	over	0.326359	0.997991	0.133333
Human Diseases	Drug resistance: antineoplastic	mmu01523	Antifolate resistance	3	579	21	6012	0.005181	0.003493	ENSMUSP00000025263 ENSMUSP00000091692 ENSMUSP00000028881	ENSMUSP00000027384 ENSMUSP00000097743 ENSMUSP00000136343 ENSMUSP00000023684 ENSMUSP00000026470 ENSMUSP00000029812 ENSMUSP00000042186 ENSMUSP00000025867 ENSMUSP00000033939 ENSMUSP00000004330 ENSMUSP00000025263 ENSMUSP00000091692 ENSMUSP00000022218 ENSMUSP00000018744 ENSMUSP00000028881 ENSMUSP00000095843 ENSMUSP00000069774 ENSMUSP00000031822 ENSMUSP00000078158 ENSMUSP00000026217 ENSMUSP00000026208	over	0.329451	0.997991	0.142857
Cellular Processes	Transport and catabolism	mmu04136	Autophagy - other	3	579	21	6012	0.005181	0.003493	ENSMUSP00000045201 ENSMUSP00000033570 ENSMUSP00000139608	ENSMUSP00000020608 ENSMUSP00000009774 ENSMUSP00000099510 ENSMUSP00000133215 ENSMUSP00000119369 ENSMUSP00000139427 ENSMUSP00000023343 ENSMUSP00000044769 ENSMUSP00000026671 ENSMUSP00000108815 ENSMUSP00000018711 ENSMUSP00000111479 ENSMUSP00000136287 ENSMUSP00000045201 ENSMUSP00000034428 ENSMUSP00000032264 ENSMUSP00000038489 ENSMUSP00000033570 ENSMUSP00000139608 ENSMUSP00000045474 ENSMUSP00000099349	over	0.329451	0.997991	0.142857
Metabolism	Glycan biosynthesis and metabolism	mmu00533	Glycosaminoglycan biosynthesis - keratan sulfate	1	579	4	6012	0.001727	0.000665	ENSMUSP00000154853	ENSMUSP00000136327 ENSMUSP00000060247 ENSMUSP00000154853 ENSMUSP00000030121	over	0.333137	0.997991	0.25
Organismal Systems	Immune system	mmu04062	Chemokine signaling pathway	10	579	88	6012	0.017271	0.014637	ENSMUSP00000121127 ENSMUSP00000031327 ENSMUSP00000019064 ENSMUSP00000039600 ENSMUSP00000087485 ENSMUSP00000021970 ENSMUSP00000074885 ENSMUSP00000019266 ENSMUSP00000001008 ENSMUSP00000105736	ENSMUSP00000090884 ENSMUSP00000079991 ENSMUSP00000152813 ENSMUSP00000022622 ENSMUSP00000142326 ENSMUSP00000100075 ENSMUSP00000072334 ENSMUSP00000107829 ENSMUSP00000101241 ENSMUSP00000141132 ENSMUSP00000003370 ENSMUSP00000106656 ENSMUSP00000005889 ENSMUSP00000016094 ENSMUSP00000037180 ENSMUSP00000000001 ENSMUSP00000156154 ENSMUSP00000069549 ENSMUSP00000130594 ENSMUSP00000025912 ENSMUSP00000056774 …	over	0.33951	0.997991	0.113636
Organismal Systems	Immune system	mmu04623	Cytosolic DNA-sensing pathway	4	579	31	6012	0.006908	0.005156	ENSMUSP00000027015 ENSMUSP00000028881 ENSMUSP00000022830 ENSMUSP00000039600	ENSMUSP00000042433 ENSMUSP00000020316 ENSMUSP00000029812 ENSMUSP00000027015 ENSMUSP00000050971 ENSMUSP00000025867 ENSMUSP00000033939 ENSMUSP00000021844 ENSMUSP00000004330 ENSMUSP00000003284 ENSMUSP00000054126 ENSMUSP00000021405 ENSMUSP00000103028 ENSMUSP00000004786 ENSMUSP00000028881 ENSMUSP00000084252 ENSMUSP00000000266 ENSMUSP00000022830 ENSMUSP00000033056 ENSMUSP00000063331 ENSMUSP00000029741 …	over	0.349097	0.997991	0.129032
Human Diseases	Cardiovascular disease	mmu05416	Viral myocarditis	4	579	31	6012	0.006908	0.005156	ENSMUSP00000071486 ENSMUSP00000083587 ENSMUSP00000007799 ENSMUSP00000131297	ENSMUSP00000071486 ENSMUSP00000000299 ENSMUSP00000047678 ENSMUSP00000101913 ENSMUSP00000124551 ENSMUSP00000083587 ENSMUSP00000134004 ENSMUSP00000145147 ENSMUSP00000098058 ENSMUSP00000140546 ENSMUSP00000017799 ENSMUSP00000057707 ENSMUSP00000027165 ENSMUSP00000080159 ENSMUSP00000099739 ENSMUSP00000041008 ENSMUSP00000036384 ENSMUSP00000072942 ENSMUSP00000134582 ENSMUSP00000147767 ENSMUSP00000046105 …	over	0.349097	0.997991	0.129032
Organismal Systems	Endocrine system	mmu04923	Regulation of lipolysis in adipocytes	3	579	22	6012	0.005181	0.003659	ENSMUSP00000035065 ENSMUSP00000109211 ENSMUSP00000059977	ENSMUSP00000142326 ENSMUSP00000000001 ENSMUSP00000130594 ENSMUSP00000085179 ENSMUSP00000056774 ENSMUSP00000005606 ENSMUSP00000035065 ENSMUSP00000099573 ENSMUSP00000029041 ENSMUSP00000035037 ENSMUSP00000109211 ENSMUSP00000088837 ENSMUSP00000059977 ENSMUSP00000101315 ENSMUSP00000103878 ENSMUSP00000073268 ENSMUSP00000103981 ENSMUSP00000123485 ENSMUSP00000001780 ENSMUSP00000127149 ENSMUSP00000119403 …	over	0.35689	0.997991	0.136364
Metabolism	Carbohydrate metabolism	mmu00040	Pentose and glucuronate interconversions	2	579	13	6012	0.003454	0.002162	ENSMUSP00000026613 ENSMUSP00000031103	ENSMUSP00000026613 ENSMUSP00000099939 ENSMUSP00000030455 ENSMUSP00000039114 ENSMUSP00000100045 ENSMUSP00000058683 ENSMUSP00000106180 ENSMUSP00000011526 ENSMUSP00000040244 ENSMUSP00000026144 ENSMUSP00000022517 ENSMUSP00000031103 ENSMUSP00000047254	over	0.360572	0.997991	0.153846
Human Diseases	Infectious disease: bacterial	mmu05135	Yersinia infection	10	579	90	6012	0.017271	0.01497	ENSMUSP00000071486 ENSMUSP00000054499 ENSMUSP00000145462 ENSMUSP00000027015 ENSMUSP00000025263 ENSMUSP00000028881 ENSMUSP00000074471 ENSMUSP00000040307 ENSMUSP00000004949 ENSMUSP00000129001	ENSMUSP00000071486 ENSMUSP00000054499 ENSMUSP00000000137 ENSMUSP00000109451 ENSMUSP00000087457 ENSMUSP00000152813 ENSMUSP00000137503 ENSMUSP00000096280 ENSMUSP00000022622 ENSMUSP00000072334 ENSMUSP00000076933 ENSMUSP00000023128 ENSMUSP00000033671 ENSMUSP00000005889 ENSMUSP00000119328 ENSMUSP00000143438 ENSMUSP00000099718 ENSMUSP00000156154 ENSMUSP00000069549 ENSMUSP00000116235 ENSMUSP00000081531 …	over	0.366072	0.997991	0.111111
Metabolism	Amino acid metabolism	mmu00330	Arginine and proline metabolism	4	579	32	6012	0.006908	0.005323	ENSMUSP00000001304 ENSMUSP00000018610 ENSMUSP00000121736 ENSMUSP00000099617	ENSMUSP00000031411 ENSMUSP00000025546 ENSMUSP00000034097 ENSMUSP00000028004 ENSMUSP00000001304 ENSMUSP00000026196 ENSMUSP00000040222 ENSMUSP00000026013 ENSMUSP00000027802 ENSMUSP00000021550 ENSMUSP00000067767 ENSMUSP00000025979 ENSMUSP00000043821 ENSMUSP00000041260 ENSMUSP00000081544 ENSMUSP00000028624 ENSMUSP00000009789 ENSMUSP00000101106 ENSMUSP00000018610 ENSMUSP00000049605 ENSMUSP00000108148 …	over	0.371852	0.997991	0.125
Organismal Systems	Endocrine system	mmu03320	PPAR signaling pathway	4	579	32	6012	0.006908	0.005323	ENSMUSP00000080974 ENSMUSP00000025500 ENSMUSP00000131415 ENSMUSP00000026220	ENSMUSP00000042351 ENSMUSP00000027153 ENSMUSP00000038555 ENSMUSP00000034046 ENSMUSP00000029046 ENSMUSP00000108528 ENSMUSP00000046585 ENSMUSP00000030340 ENSMUSP00000063412 ENSMUSP00000078971 ENSMUSP00000072483 ENSMUSP00000080974 ENSMUSP00000030345 ENSMUSP00000033182 ENSMUSP00000063325 ENSMUSP00000029041 ENSMUSP00000148768 ENSMUSP00000109611 ENSMUSP00000025835 ENSMUSP00000136944 ENSMUSP00000045291 …	over	0.371852	0.997991	0.125
Human Diseases	Infectious disease: viral	mmu05165	Human papillomavirus infection	15	579	141	6012	0.025907	0.023453	ENSMUSP00000054499 ENSMUSP00000029900 ENSMUSP00000035065 ENSMUSP00000024932 ENSMUSP00000025263 ENSMUSP00000048770 ENSMUSP00000082548 ENSMUSP00000023693 ENSMUSP00000058629 ENSMUSP00000031542 ENSMUSP00000120525 ENSMUSP00000104548 ENSMUSP00000154338 ENSMUSP00000109884 ENSMUSP00000131297	ENSMUSP00000034834 ENSMUSP00000128770 ENSMUSP00000110314 ENSMUSP00000028499 ENSMUSP00000095433 ENSMUSP00000108011 ENSMUSP00000006435 ENSMUSP00000054499 ENSMUSP00000122474 ENSMUSP00000087457 ENSMUSP00000099399 ENSMUSP00000002091 ENSMUSP00000110680 ENSMUSP00000040756 ENSMUSP00000023128 ENSMUSP00000141132 ENSMUSP00000099842 ENSMUSP00000007708 ENSMUSP00000150509 ENSMUSP00000022904 ENSMUSP00000099718 …	over	0.381994	0.997991	0.106383
Human Diseases	Immune disease	mmu05330	Allograft rejection	2	579	14	6012	0.003454	0.002329	ENSMUSP00000025263 ENSMUSP00000131297	ENSMUSP00000134004 ENSMUSP00000017799 ENSMUSP00000027165 ENSMUSP00000080159 ENSMUSP00000099739 ENSMUSP00000041008 ENSMUSP00000025263 ENSMUSP00000072942 ENSMUSP00000134582 ENSMUSP00000046105 ENSMUSP00000087047 ENSMUSP00000109389 ENSMUSP00000035687 ENSMUSP00000131297	over	0.396387	0.997991	0.142857
Metabolism	Lipid metabolism	mmu00120	Primary bile acid biosynthesis	1	579	5	6012	0.001727	0.000832	ENSMUSP00000036245	ENSMUSP00000025385 ENSMUSP00000030340 ENSMUSP00000027356 ENSMUSP00000099383 ENSMUSP00000036245	over	0.397403	0.997991	0.2
Metabolism	Lipid metabolism	mmu00592	alpha-Linolenic acid metabolism	1	579	5	6012	0.001727	0.000832	ENSMUSP00000070868	ENSMUSP00000042351 ENSMUSP00000063412 ENSMUSP00000063325 ENSMUSP00000070868 ENSMUSP00000119403	over	0.397403	0.997991	0.2
Organismal Systems	Endocrine system	mmu04926	Relaxin signaling pathway	6	579	53	6012	0.010363	0.008816	ENSMUSP00000121127 ENSMUSP00000018610 ENSMUSP00000087485 ENSMUSP00000049175 ENSMUSP00000099617 ENSMUSP00000105736	ENSMUSP00000142326 ENSMUSP00000101241 ENSMUSP00000106656 ENSMUSP00000000001 ENSMUSP00000156154 ENSMUSP00000130594 ENSMUSP00000085179 ENSMUSP00000025912 ENSMUSP00000056774 ENSMUSP00000102106 ENSMUSP00000005606 ENSMUSP00000051619 ENSMUSP00000029445 ENSMUSP00000029812 ENSMUSP00000099573 ENSMUSP00000136963 ENSMUSP00000002678 ENSMUSP00000104208 ENSMUSP00000035037 ENSMUSP00000061958 ENSMUSP00000025867 …	over	0.403141	0.997991	0.113208
Human Diseases	Endocrine and metabolic disease	mmu04932	Non-alcoholic fatty liver disease	10	579	93	6012	0.017271	0.015469	ENSMUSP00000025263 ENSMUSP00000028881 ENSMUSP00000115419 ENSMUSP00000000175 ENSMUSP00000028882 ENSMUSP00000054856 ENSMUSP00000066303 ENSMUSP00000080993 ENSMUSP00000146960 ENSMUSP00000033582	ENSMUSP00000022062 ENSMUSP00000027111 ENSMUSP00000033176 ENSMUSP00000071214 ENSMUSP00000026743 ENSMUSP00000042967 ENSMUSP00000010007 ENSMUSP00000027478 ENSMUSP00000034276 ENSMUSP00000144904 ENSMUSP00000056774 ENSMUSP00000054634 ENSMUSP00000013737 ENSMUSP00000098058 ENSMUSP00000029812 ENSMUSP00000020209 ENSMUSP00000140546 ENSMUSP00000039692 ENSMUSP00000075150 ENSMUSP00000033093 ENSMUSP00000002678 …	over	0.406308	0.997991	0.107527
Environmental Information Processing	Signaling molecules and interaction	mmu04512	ECM-receptor interaction	3	579	24	6012	0.005181	0.003992	ENSMUSP00000054499 ENSMUSP00000080974 ENSMUSP00000017153	ENSMUSP00000028499 ENSMUSP00000054499 ENSMUSP00000087457 ENSMUSP00000110680 ENSMUSP00000023128 ENSMUSP00000099718 ENSMUSP00000080974 ENSMUSP00000005218 ENSMUSP00000021028 ENSMUSP00000155289 ENSMUSP00000001547 ENSMUSP00000031668 ENSMUSP00000001147 ENSMUSP00000084043 ENSMUSP00000155856 ENSMUSP00000044903 ENSMUSP00000108553 ENSMUSP00000017153 ENSMUSP00000033899 ENSMUSP00000044227 ENSMUSP00000057131 …	over	0.411174	0.997991	0.125
Organismal Systems	Nervous system	mmu04724	Glutamatergic synapse	4	579	34	6012	0.006908	0.005655	ENSMUSP00000121127 ENSMUSP00000070868 ENSMUSP00000087485 ENSMUSP00000105736	ENSMUSP00000142326 ENSMUSP00000101241 ENSMUSP00000110158 ENSMUSP00000106656 ENSMUSP00000000001 ENSMUSP00000110155 ENSMUSP00000156154 ENSMUSP00000130594 ENSMUSP00000085179 ENSMUSP00000025912 ENSMUSP00000025541 ENSMUSP00000005606 ENSMUSP00000049584 ENSMUSP00000051619 ENSMUSP00000071040 ENSMUSP00000038150 ENSMUSP00000138788 ENSMUSP00000099573 ENSMUSP00000086114 ENSMUSP00000145346 ENSMUSP00000121127 …	over	0.417108	0.997991	0.117647
Human Diseases	Infectious disease: viral	mmu05163	Human cytomegalovirus infection	12	579	114	6012	0.020725	0.018962	ENSMUSP00000035065 ENSMUSP00000121127 ENSMUSP00000025263 ENSMUSP00000028881 ENSMUSP00000099534 ENSMUSP00000039600 ENSMUSP00000087485 ENSMUSP00000154338 ENSMUSP00000001008 ENSMUSP00000131297 ENSMUSP00000129001 ENSMUSP00000105736	ENSMUSP00000028499 ENSMUSP00000028683 ENSMUSP00000003912 ENSMUSP00000152813 ENSMUSP00000096280 ENSMUSP00000022622 ENSMUSP00000142326 ENSMUSP00000019514 ENSMUSP00000101241 ENSMUSP00000099842 ENSMUSP00000020930 ENSMUSP00000106656 ENSMUSP00000025161 ENSMUSP00000000001 ENSMUSP00000156154 ENSMUSP00000069549 ENSMUSP00000130594 ENSMUSP00000134004 ENSMUSP00000128401 ENSMUSP00000085179 ENSMUSP00000025912 …	over	0.417854	0.997991	0.105263
Organismal Systems	Immune system	mmu04613	Neutrophil extracellular trap formation	9	579	84	6012	0.015544	0.013972	ENSMUSP00000071486 ENSMUSP00000027015 ENSMUSP00000022419 ENSMUSP00000141648 ENSMUSP00000040307 ENSMUSP00000111412 ENSMUSP00000028233 ENSMUSP00000015596 ENSMUSP00000105736	ENSMUSP00000071486 ENSMUSP00000000299 ENSMUSP00000068468 ENSMUSP00000079991 ENSMUSP00000020673 ENSMUSP00000134023 ENSMUSP00000140404 ENSMUSP00000016463 ENSMUSP00000015484 ENSMUSP00000016081 ENSMUSP00000034049 ENSMUSP00000024988 ENSMUSP00000101913 ENSMUSP00000009036 ENSMUSP00000085006 ENSMUSP00000106099 ENSMUSP00000078239 ENSMUSP00000113852 ENSMUSP00000107787 ENSMUSP00000016094 ENSMUSP00000020779 …	over	0.420513	0.997991	0.107143
Organismal Systems	Endocrine system	mmu04921	Oxytocin signaling pathway	6	579	54	6012	0.010363	0.008982	ENSMUSP00000071486 ENSMUSP00000083474 ENSMUSP00000035065 ENSMUSP00000070868 ENSMUSP00000129001 ENSMUSP00000105736	ENSMUSP00000071486 ENSMUSP00000046101 ENSMUSP00000152813 ENSMUSP00000142326 ENSMUSP00000019514 ENSMUSP00000151915 ENSMUSP00000039109 ENSMUSP00000000001 ENSMUSP00000156154 ENSMUSP00000069549 ENSMUSP00000083474 ENSMUSP00000130594 ENSMUSP00000085179 ENSMUSP00000025912 ENSMUSP00000025541 ENSMUSP00000015100 ENSMUSP00000005606 ENSMUSP00000007959 ENSMUSP00000049584 ENSMUSP00000051619 ENSMUSP00000071040 …	over	0.420954	0.997991	0.111111
Human Diseases	Infectious disease: viral	mmu05169	Epstein-Barr virus infection	12	579	115	6012	0.020725	0.019128	ENSMUSP00000083587 ENSMUSP00000025263 ENSMUSP00000019997 ENSMUSP00000099534 ENSMUSP00000074471 ENSMUSP00000082548 ENSMUSP00000023693 ENSMUSP00000040307 ENSMUSP00000094225 ENSMUSP00000120525 ENSMUSP00000004949 ENSMUSP00000131297	ENSMUSP00000028062 ENSMUSP00000028683 ENSMUSP00000003912 ENSMUSP00000079991 ENSMUSP00000071054 ENSMUSP00000027432 ENSMUSP00000007212 ENSMUSP00000100075 ENSMUSP00000021049 ENSMUSP00000124382 ENSMUSP00000101913 ENSMUSP00000141132 ENSMUSP00000099842 ENSMUSP00000021063 ENSMUSP00000017365 ENSMUSP00000113852 ENSMUSP00000133571 ENSMUSP00000083587 ENSMUSP00000025161 ENSMUSP00000022380 ENSMUSP00000072859 …	over	0.430065	0.997991	0.104348
Genetic Information Processing	Replication and repair	mmu03440	Homologous recombination	2	579	15	6012	0.003454	0.002495	ENSMUSP00000156132 ENSMUSP00000018985	ENSMUSP00000020649 ENSMUSP00000000767 ENSMUSP00000110427 ENSMUSP00000110160 ENSMUSP00000033544 ENSMUSP00000039776 ENSMUSP00000156132 ENSMUSP00000002473 ENSMUSP00000029879 ENSMUSP00000099621 ENSMUSP00000012627 ENSMUSP00000034405 ENSMUSP00000099986 ENSMUSP00000035164 ENSMUSP00000018985	over	0.431246	0.997991	0.133333
Organismal Systems	Endocrine system	mmu04927	Cortisol synthesis and secretion	2	579	15	6012	0.003454	0.002495	ENSMUSP00000034713 ENSMUSP00000105736	ENSMUSP00000045864 ENSMUSP00000130594 ENSMUSP00000085179 ENSMUSP00000025912 ENSMUSP00000025541 ENSMUSP00000005606 ENSMUSP00000049584 ENSMUSP00000038150 ENSMUSP00000099573 ENSMUSP00000043190 ENSMUSP00000099583 ENSMUSP00000034713 ENSMUSP00000001326 ENSMUSP00000058521 ENSMUSP00000105736	over	0.431246	0.997991	0.133333
Organismal Systems	Endocrine system	mmu04925	Aldosterone synthesis and secretion	3	579	25	6012	0.005181	0.004158	ENSMUSP00000043088 ENSMUSP00000034713 ENSMUSP00000105736	ENSMUSP00000039657 ENSMUSP00000099922 ENSMUSP00000020107 ENSMUSP00000083077 ENSMUSP00000019514 ENSMUSP00000043088 ENSMUSP00000130594 ENSMUSP00000085179 ENSMUSP00000025912 ENSMUSP00000025541 ENSMUSP00000005606 ENSMUSP00000049584 ENSMUSP00000038150 ENSMUSP00000138788 ENSMUSP00000034983 ENSMUSP00000099573 ENSMUSP00000129999 ENSMUSP00000043190 ENSMUSP00000081956 ENSMUSP00000099583 ENSMUSP00000034713 …	over	0.4378	0.997991	0.12
Organismal Systems	Immune system	mmu04611	Platelet activation	7	579	66	6012	0.01209	0.010978	ENSMUSP00000071486 ENSMUSP00000119441 ENSMUSP00000083474 ENSMUSP00000059977 ENSMUSP00000070868 ENSMUSP00000141648 ENSMUSP00000105736	ENSMUSP00000030187 ENSMUSP00000071486 ENSMUSP00000079991 ENSMUSP00000087457 ENSMUSP00000037858 ENSMUSP00000152813 ENSMUSP00000096280 ENSMUSP00000142326 ENSMUSP00000100075 ENSMUSP00000020930 ENSMUSP00000113852 ENSMUSP00000119441 ENSMUSP00000039109 ENSMUSP00000000001 ENSMUSP00000156154 ENSMUSP00000069549 ENSMUSP00000083474 ENSMUSP00000130594 ENSMUSP00000085179 ENSMUSP00000025912 ENSMUSP00000032561 …	over	0.453781	0.997991	0.106061
Environmental Information Processing	Signal transduction	mmu04390	Hippo signaling pathway	5	579	46	6012	0.008636	0.007651	ENSMUSP00000071486 ENSMUSP00000083474 ENSMUSP00000058629 ENSMUSP00000109884 ENSMUSP00000113252	ENSMUSP00000071486 ENSMUSP00000000299 ENSMUSP00000070993 ENSMUSP00000022894 ENSMUSP00000019109 ENSMUSP00000123605 ENSMUSP00000007708 ENSMUSP00000018470 ENSMUSP00000143631 ENSMUSP00000039109 ENSMUSP00000083474 ENSMUSP00000020608 ENSMUSP00000015100 ENSMUSP00000009774 ENSMUSP00000064280 ENSMUSP00000002678 ENSMUSP00000002603 ENSMUSP00000018476 ENSMUSP00000086640 ENSMUSP00000060749 ENSMUSP00000110398 …	over	0.458962	0.997991	0.108696
Human Diseases	Cancer: specific types	mmu05219	Bladder cancer	2	579	16	6012	0.003454	0.002661	ENSMUSP00000042987 ENSMUSP00000113252	ENSMUSP00000156154 ENSMUSP00000051619 ENSMUSP00000029445 ENSMUSP00000107339 ENSMUSP00000026572 ENSMUSP00000005066 ENSMUSP00000105155 ENSMUSP00000001155 ENSMUSP00000108571 ENSMUSP00000153607 ENSMUSP00000137333 ENSMUSP00000044903 ENSMUSP00000121111 ENSMUSP00000006911 ENSMUSP00000042987 ENSMUSP00000113252	over	0.465002	0.997991	0.125
Human Diseases	Neurodegenerative disease	mmu05022	Pathways of neurodegeneration - multiple diseases	27	579	273	6012	0.046632	0.045409	ENSMUSP00000078429 ENSMUSP00000035065 ENSMUSP00000020312 ENSMUSP00000015981 ENSMUSP00000025263 ENSMUSP00000018610 ENSMUSP00000028881 ENSMUSP00000022419 ENSMUSP00000115419 ENSMUSP00000000175 ENSMUSP00000126067 ENSMUSP00000028882 ENSMUSP00000054856 ENSMUSP00000045201 ENSMUSP00000066303 ENSMUSP00000080998 ENSMUSP00000016396 ENSMUSP00000058629 ENSMUSP00000056715 ENSMUSP00000080993 ENSMUSP00000146960 …	ENSMUSP00000028222 ENSMUSP00000030164 ENSMUSP00000026495 ENSMUSP00000026459 ENSMUSP00000135935 ENSMUSP00000022062 ENSMUSP00000059033 ENSMUSP00000086626 ENSMUSP00000027111 ENSMUSP00000025083 ENSMUSP00000020673 ENSMUSP00000134023 ENSMUSP00000076777 ENSMUSP00000109552 ENSMUSP00000071054 ENSMUSP00000016463 ENSMUSP00000027432 ENSMUSP00000033176 ENSMUSP00000051033 ENSMUSP00000028610 ENSMUSP00000025891 …	over	0.472329	0.997991	0.0989011
Human Diseases	Neurodegenerative disease	mmu05020	Prion disease	18	579	182	6012	0.031088	0.030273	ENSMUSP00000078429 ENSMUSP00000020312 ENSMUSP00000025263 ENSMUSP00000028881 ENSMUSP00000022419 ENSMUSP00000115419 ENSMUSP00000000175 ENSMUSP00000039600 ENSMUSP00000028882 ENSMUSP00000054856 ENSMUSP00000066303 ENSMUSP00000080998 ENSMUSP00000016396 ENSMUSP00000007799 ENSMUSP00000080993 ENSMUSP00000028233 ENSMUSP00000146960 ENSMUSP00000033582	ENSMUSP00000028222 ENSMUSP00000015800 ENSMUSP00000026495 ENSMUSP00000026459 ENSMUSP00000022062 ENSMUSP00000027111 ENSMUSP00000025083 ENSMUSP00000020673 ENSMUSP00000134023 ENSMUSP00000076777 ENSMUSP00000140404 ENSMUSP00000071054 ENSMUSP00000016463 ENSMUSP00000027432 ENSMUSP00000033176 ENSMUSP00000051033 ENSMUSP00000078429 ENSMUSP00000025918 ENSMUSP00000015484 ENSMUSP00000007212 ENSMUSP00000001566 …	over	0.489878	0.997991	0.0989011
Human Diseases	Cardiovascular disease	mmu05415	Diabetic cardiomyopathy	14	579	141	6012	0.02418	0.023453	ENSMUSP00000083474 ENSMUSP00000080974 ENSMUSP00000022419 ENSMUSP00000115419 ENSMUSP00000000175 ENSMUSP00000054856 ENSMUSP00000066303 ENSMUSP00000080998 ENSMUSP00000016396 ENSMUSP00000080993 ENSMUSP00000146960 ENSMUSP00000033582 ENSMUSP00000015596 ENSMUSP00000105736	ENSMUSP00000026495 ENSMUSP00000026459 ENSMUSP00000135935 ENSMUSP00000022062 ENSMUSP00000027111 ENSMUSP00000113942 ENSMUSP00000020673 ENSMUSP00000121203 ENSMUSP00000134023 ENSMUSP00000004327 ENSMUSP00000140404 ENSMUSP00000027777 ENSMUSP00000016463 ENSMUSP00000033176 ENSMUSP00000015484 ENSMUSP00000034049 ENSMUSP00000033992 ENSMUSP00000107829 ENSMUSP00000009036 ENSMUSP00000026743 ENSMUSP00000033662 …	over	0.494211	0.997991	0.0992908
Metabolism	Lipid metabolism	mmu00062	Fatty acid elongation	2	579	17	6012	0.003454	0.002828	ENSMUSP00000060462 ENSMUSP00000006557	ENSMUSP00000120976 ENSMUSP00000026841 ENSMUSP00000026538 ENSMUSP00000037348 ENSMUSP00000019382 ENSMUSP00000029610 ENSMUSP00000028619 ENSMUSP00000021649 ENSMUSP00000030742 ENSMUSP00000030412 ENSMUSP00000126448 ENSMUSP00000044955 ENSMUSP00000129121 ENSMUSP00000127745 ENSMUSP00000060462 ENSMUSP00000034904 ENSMUSP00000006557	over	0.497543	0.997991	0.117647
Organismal Systems	Digestive system	mmu04978	Mineral absorption	2	579	17	6012	0.003454	0.002828	ENSMUSP00000104485 ENSMUSP00000034214	ENSMUSP00000039657 ENSMUSP00000099922 ENSMUSP00000020107 ENSMUSP00000083077 ENSMUSP00000058840 ENSMUSP00000108264 ENSMUSP00000004172 ENSMUSP00000034983 ENSMUSP00000005548 ENSMUSP00000104485 ENSMUSP00000126373 ENSMUSP00000042410 ENSMUSP00000081574 ENSMUSP00000023774 ENSMUSP00000148443 ENSMUSP00000034214 ENSMUSP00000037443	over	0.497543	0.997991	0.117647
Genetic Information Processing	Replication and repair	mmu03460	Fanconi anemia pathway	1	579	7	6012	0.001727	0.001164	ENSMUSP00000156132	ENSMUSP00000000767 ENSMUSP00000156132 ENSMUSP00000042509 ENSMUSP00000099621 ENSMUSP00000012627 ENSMUSP00000019986 ENSMUSP00000023206	over	0.507979	0.997991	0.142857
Human Diseases	Immune disease	mmu05310	Asthma	1	579	7	6012	0.001727	0.001164	ENSMUSP00000025263	ENSMUSP00000050497 ENSMUSP00000017799 ENSMUSP00000028467 ENSMUSP00000041008 ENSMUSP00000025263 ENSMUSP00000078875 ENSMUSP00000046105	over	0.507979	0.997991	0.142857
Human Diseases	Infectious disease: viral	mmu05167	Kaposi sarcoma-associated herpesvirus infection	10	579	101	6012	0.017271	0.0168	ENSMUSP00000083587 ENSMUSP00000035065 ENSMUSP00000121127 ENSMUSP00000031327 ENSMUSP00000023693 ENSMUSP00000087485 ENSMUSP00000120525 ENSMUSP00000074885 ENSMUSP00000131297 ENSMUSP00000129001	ENSMUSP00000079991 ENSMUSP00000100075 ENSMUSP00000019514 ENSMUSP00000024988 ENSMUSP00000101241 ENSMUSP00000141132 ENSMUSP00000099842 ENSMUSP00000003370 ENSMUSP00000106656 ENSMUSP00000113852 ENSMUSP00000083587 ENSMUSP00000037180 ENSMUSP00000156154 ENSMUSP00000134004 ENSMUSP00000056774 ENSMUSP00000049584 ENSMUSP00000051619 ENSMUSP00000071040 ENSMUSP00000038150 ENSMUSP00000020316 ENSMUSP00000029445 …	over	0.512939	0.997991	0.0990099
Metabolism	Lipid metabolism	mmu00561	Glycerolipid metabolism	3	579	28	6012	0.005181	0.004657	ENSMUSP00000109211 ENSMUSP00000065719 ENSMUSP00000064423	ENSMUSP00000031411 ENSMUSP00000028004 ENSMUSP00000030455 ENSMUSP00000039114 ENSMUSP00000100045 ENSMUSP00000067767 ENSMUSP00000041260 ENSMUSP00000109611 ENSMUSP00000106934 ENSMUSP00000040244 ENSMUSP00000031977 ENSMUSP00000109211 ENSMUSP00000001240 ENSMUSP00000024594 ENSMUSP00000068690 ENSMUSP00000117025 ENSMUSP00000065089 ENSMUSP00000015712 ENSMUSP00000048573 ENSMUSP00000065719 ENSMUSP00000023214 …	over	0.514563	0.997991	0.107143
Genetic Information Processing	Translation	mmu03010	Ribosome	11	579	113	6012	0.018998	0.018796	ENSMUSP00000003521 ENSMUSP00000106250 ENSMUSP00000117834 ENSMUSP00000069004 ENSMUSP00000112977 ENSMUSP00000131489 ENSMUSP00000102213 ENSMUSP00000044497 ENSMUSP00000066990 ENSMUSP00000078123 ENSMUSP00000001485	ENSMUSP00000080354 ENSMUSP00000034966 ENSMUSP00000032998 ENSMUSP00000029722 ENSMUSP00000099962 ENSMUSP00000092502 ENSMUSP00000031617 ENSMUSP00000033683 ENSMUSP00000071616 ENSMUSP00000083705 ENSMUSP00000080854 ENSMUSP00000104068 ENSMUSP00000117461 ENSMUSP00000006496 ENSMUSP00000035105 ENSMUSP00000099757 ENSMUSP00000109399 ENSMUSP00000048469 ENSMUSP00000032597 ENSMUSP00000008812 ENSMUSP00000081474 …	over	0.532408	0.997991	0.0973451
Genetic Information Processing	Folding, sorting and degradation	mmu04120	Ubiquitin mediated proteolysis	7	579	71	6012	0.01209	0.01181	ENSMUSP00000151886 ENSMUSP00000055714 ENSMUSP00000062277 ENSMUSP00000143606 ENSMUSP00000094225 ENSMUSP00000031072 ENSMUSP00000004949	ENSMUSP00000086626 ENSMUSP00000025649 ENSMUSP00000031697 ENSMUSP00000147409 ENSMUSP00000140224 ENSMUSP00000035328 ENSMUSP00000110771 ENSMUSP00000026292 ENSMUSP00000034529 ENSMUSP00000130738 ENSMUSP00000035216 ENSMUSP00000136858 ENSMUSP00000099909 ENSMUSP00000125403 ENSMUSP00000099807 ENSMUSP00000016680 ENSMUSP00000139480 ENSMUSP00000040431 ENSMUSP00000143859 ENSMUSP00000146244 ENSMUSP00000151886 …	over	0.533049	0.997991	0.0985915
Metabolism	Metabolism of cofactors and vitamins	mmu00730	Thiamine metabolism	1	579	8	6012	0.001727	0.001331	ENSMUSP00000030583	ENSMUSP00000029147 ENSMUSP00000030583 ENSMUSP00000106509 ENSMUSP00000073686 ENSMUSP00000034313 ENSMUSP00000065631 ENSMUSP00000056026 ENSMUSP00000099841	over	0.55542	0.997991	0.125
Organismal Systems	Sensory system	mmu04742	Taste transduction	1	579	8	6012	0.001727	0.001331	ENSMUSP00000105736	ENSMUSP00000025912 ENSMUSP00000005606 ENSMUSP00000038150 ENSMUSP00000099573 ENSMUSP00000099583 ENSMUSP00000122685 ENSMUSP00000054233 ENSMUSP00000105736	over	0.55542	0.997991	0.125
Organismal Systems	Nervous system	mmu04730	Long-term depression	3	579	30	6012	0.005181	0.00499	ENSMUSP00000070868 ENSMUSP00000099617 ENSMUSP00000105736	ENSMUSP00000142326 ENSMUSP00000100075 ENSMUSP00000020930 ENSMUSP00000007708 ENSMUSP00000000001 ENSMUSP00000156154 ENSMUSP00000085179 ENSMUSP00000025912 ENSMUSP00000020608 ENSMUSP00000025541 ENSMUSP00000009774 ENSMUSP00000049584 ENSMUSP00000051619 ENSMUSP00000038150 ENSMUSP00000138788 ENSMUSP00000029445 ENSMUSP00000000153 ENSMUSP00000043190 ENSMUSP00000107339 ENSMUSP00000026572 ENSMUSP00000070868 …	over	0.562506	0.997991	0.1
Organismal Systems	Endocrine system	mmu04912	GnRH signaling pathway	4	579	41	6012	0.006908	0.00682	ENSMUSP00000087119 ENSMUSP00000070868 ENSMUSP00000086459 ENSMUSP00000105736	ENSMUSP00000022622 ENSMUSP00000107829 ENSMUSP00000019514 ENSMUSP00000156154 ENSMUSP00000130594 ENSMUSP00000085179 ENSMUSP00000025912 ENSMUSP00000054634 ENSMUSP00000102106 ENSMUSP00000025541 ENSMUSP00000005606 ENSMUSP00000049584 ENSMUSP00000051619 ENSMUSP00000038150 ENSMUSP00000138788 ENSMUSP00000029445 ENSMUSP00000099573 ENSMUSP00000129999 ENSMUSP00000043190 ENSMUSP00000061958 ENSMUSP00000087119 …	over	0.566575	0.997991	0.097561
Organismal Systems	Digestive system	mmu04972	Pancreatic secretion	3	579	31	6012	0.005181	0.005156	ENSMUSP00000022576 ENSMUSP00000031931 ENSMUSP00000105736	ENSMUSP00000039657 ENSMUSP00000099922 ENSMUSP00000020107 ENSMUSP00000135935 ENSMUSP00000083077 ENSMUSP00000021142 ENSMUSP00000130594 ENSMUSP00000085179 ENSMUSP00000025912 ENSMUSP00000129163 ENSMUSP00000025541 ENSMUSP00000007959 ENSMUSP00000049584 ENSMUSP00000066238 ENSMUSP00000038150 ENSMUSP00000138788 ENSMUSP00000088174 ENSMUSP00000003121 ENSMUSP00000098058 ENSMUSP00000034983 ENSMUSP00000078972 …	over	0.585371	0.997991	0.0967742
Human Diseases	Cardiovascular disease	mmu05412	Arrhythmogenic right ventricular cardiomyopathy	2	579	20	6012	0.003454	0.003327	ENSMUSP00000071486 ENSMUSP00000064536	ENSMUSP00000071486 ENSMUSP00000029699 ENSMUSP00000135935 ENSMUSP00000028499 ENSMUSP00000087457 ENSMUSP00000110680 ENSMUSP00000023128 ENSMUSP00000021142 ENSMUSP00000099718 ENSMUSP00000115062 ENSMUSP00000021028 ENSMUSP00000001592 ENSMUSP00000049007 ENSMUSP00000126373 ENSMUSP00000002029 ENSMUSP00000064536 ENSMUSP00000044227 ENSMUSP00000007130 ENSMUSP00000142109 ENSMUSP00000022567	over	0.587213	0.997991	0.1
Organismal Systems	Environmental adaptation	mmu04710	Circadian rhythm	1	579	9	6012	0.001727	0.001497	ENSMUSP00000032194	ENSMUSP00000031697 ENSMUSP00000038744 ENSMUSP00000132499 ENSMUSP00000063166 ENSMUSP00000075721 ENSMUSP00000030784 ENSMUSP00000032194 ENSMUSP00000143939 ENSMUSP00000023036	over	0.598293	0.997991	0.111111
Environmental Information Processing	Signal transduction	mmu04392	Hippo signaling pathway - multiple species	1	579	10	6012	0.001727	0.001663	ENSMUSP00000113252	ENSMUSP00000018476 ENSMUSP00000146055 ENSMUSP00000108855 ENSMUSP00000048267 ENSMUSP00000028814 ENSMUSP00000105536 ENSMUSP00000150888 ENSMUSP00000026269 ENSMUSP00000113252 ENSMUSP00000006311	over	0.637039	0.997991	0.1
Human Diseases	Neurodegenerative disease	mmu05014	Amyotrophic lateral sclerosis	23	579	240	6012	0.039724	0.03992	ENSMUSP00000071486 ENSMUSP00000078429 ENSMUSP00000027015 ENSMUSP00000020312 ENSMUSP00000015981 ENSMUSP00000025263 ENSMUSP00000018610 ENSMUSP00000115419 ENSMUSP00000000175 ENSMUSP00000054856 ENSMUSP00000045201 ENSMUSP00000066303 ENSMUSP00000080998 ENSMUSP00000016396 ENSMUSP00000056715 ENSMUSP00000046732 ENSMUSP00000080993 ENSMUSP00000008748 ENSMUSP00000146960 ENSMUSP00000125647 ENSMUSP00000033582 …	ENSMUSP00000117616 ENSMUSP00000071486 ENSMUSP00000028222 ENSMUSP00000030164 ENSMUSP00000026495 ENSMUSP00000026459 ENSMUSP00000022062 ENSMUSP00000003310 ENSMUSP00000027111 ENSMUSP00000025083 ENSMUSP00000020673 ENSMUSP00000076777 ENSMUSP00000109552 ENSMUSP00000071054 ENSMUSP00000027432 ENSMUSP00000033176 ENSMUSP00000051033 ENSMUSP00000028610 ENSMUSP00000145028 ENSMUSP00000078429 ENSMUSP00000144126 …	under	0.543639	0.997991	0.0958333
Environmental Information Processing	Signal transduction	mmu04150	mTOR signaling pathway	7	579	73	6012	0.01209	0.012142	ENSMUSP00000025263 ENSMUSP00000048770 ENSMUSP00000053403 ENSMUSP00000058629 ENSMUSP00000094225 ENSMUSP00000154338 ENSMUSP00000109884	ENSMUSP00000110314 ENSMUSP00000006435 ENSMUSP00000107192 ENSMUSP00000031382 ENSMUSP00000040756 ENSMUSP00000033671 ENSMUSP00000130194 ENSMUSP00000119328 ENSMUSP00000022904 ENSMUSP00000019354 ENSMUSP00000156154 ENSMUSP00000108987 ENSMUSP00000056774 ENSMUSP00000102106 ENSMUSP00000030399 ENSMUSP00000007959 ENSMUSP00000051619 ENSMUSP00000138788 ENSMUSP00000029445 ENSMUSP00000099510 ENSMUSP00000099878 …	under	0.563496	0.997991	0.0958904
Environmental Information Processing	Signal transduction	mmu04152	AMPK signaling pathway	5	579	52	6012	0.008636	0.008649	ENSMUSP00000080974 ENSMUSP00000022176 ENSMUSP00000040307 ENSMUSP00000154338 ENSMUSP00000026220	ENSMUSP00000046101 ENSMUSP00000052872 ENSMUSP00000038555 ENSMUSP00000028238 ENSMUSP00000007708 ENSMUSP00000057664 ENSMUSP00000021001 ENSMUSP00000021614 ENSMUSP00000110021 ENSMUSP00000108987 ENSMUSP00000056774 ENSMUSP00000020608 ENSMUSP00000020522 ENSMUSP00000009774 ENSMUSP00000080974 ENSMUSP00000003121 ENSMUSP00000096549 ENSMUSP00000099510 ENSMUSP00000025835 ENSMUSP00000035037 ENSMUSP00000099490 …	under	0.570625	0.997991	0.0961538
Cellular Processes	Cell growth and death	mmu04110	Cell cycle	5	579	53	6012	0.008636	0.008816	ENSMUSP00000059192 ENSMUSP00000050374 ENSMUSP00000000505 ENSMUSP00000094225 ENSMUSP00000031072	ENSMUSP00000025930 ENSMUSP00000044645 ENSMUSP00000070993 ENSMUSP00000031697 ENSMUSP00000022894 ENSMUSP00000019109 ENSMUSP00000123605 ENSMUSP00000018470 ENSMUSP00000143631 ENSMUSP00000110725 ENSMUSP00000027601 ENSMUSP00000028817 ENSMUSP00000099657 ENSMUSP00000061923 ENSMUSP00000031534 ENSMUSP00000081547 ENSMUSP00000126135 ENSMUSP00000059192 ENSMUSP00000002678 ENSMUSP00000116205 ENSMUSP00000126024 …	under	0.588072	0.997991	0.0943396
Organismal Systems	Circulatory system	mmu04261	Adrenergic signaling in cardiomyocytes	5	579	53	6012	0.008636	0.008816	ENSMUSP00000087736 ENSMUSP00000083474 ENSMUSP00000103546 ENSMUSP00000042987 ENSMUSP00000105736	ENSMUSP00000039657 ENSMUSP00000099922 ENSMUSP00000020107 ENSMUSP00000135935 ENSMUSP00000087736 ENSMUSP00000083077 ENSMUSP00000029549 ENSMUSP00000142326 ENSMUSP00000019514 ENSMUSP00000007708 ENSMUSP00000109325 ENSMUSP00000003575 ENSMUSP00000021142 ENSMUSP00000109326 ENSMUSP00000039109 ENSMUSP00000000001 ENSMUSP00000156154 ENSMUSP00000083474 ENSMUSP00000130594 ENSMUSP00000085179 ENSMUSP00000025912 …	under	0.588072	0.997991	0.0943396
Genetic Information Processing	Translation	mmu03013	Nucleocytoplasmic transport	8	579	87	6012	0.013817	0.014471	ENSMUSP00000055714 ENSMUSP00000084257 ENSMUSP00000115044 ENSMUSP00000129789 ENSMUSP00000124450 ENSMUSP00000046732 ENSMUSP00000099879 ENSMUSP00000017384	ENSMUSP00000117616 ENSMUSP00000042457 ENSMUSP00000003310 ENSMUSP00000032898 ENSMUSP00000075089 ENSMUSP00000144126 ENSMUSP00000048084 ENSMUSP00000026667 ENSMUSP00000001479 ENSMUSP00000099933 ENSMUSP00000148115 ENSMUSP00000054556 ENSMUSP00000126849 ENSMUSP00000128819 ENSMUSP00000078878 ENSMUSP00000059289 ENSMUSP00000129504 ENSMUSP00000002790 ENSMUSP00000036093 ENSMUSP00000063590 ENSMUSP00000070682 …	under	0.609139	0.997991	0.091954
Environmental Information Processing	Signal transduction	mmu04072	Phospholipase D signaling pathway	6	579	66	6012	0.010363	0.010978	ENSMUSP00000070868 ENSMUSP00000097756 ENSMUSP00000065719 ENSMUSP00000064423 ENSMUSP00000154338 ENSMUSP00000105736	ENSMUSP00000079991 ENSMUSP00000072199 ENSMUSP00000022622 ENSMUSP00000020930 ENSMUSP00000113852 ENSMUSP00000156154 ENSMUSP00000130594 ENSMUSP00000085179 ENSMUSP00000025912 ENSMUSP00000056774 ENSMUSP00000102106 ENSMUSP00000007959 ENSMUSP00000051619 ENSMUSP00000051814 ENSMUSP00000029445 ENSMUSP00000099510 ENSMUSP00000058757 ENSMUSP00000106934 ENSMUSP00000000153 ENSMUSP00000038225 ENSMUSP00000035037 …	under	0.621195	0.997991	0.0909091
Cellular Processes	Cell growth and death	mmu04218	Cellular senescence	7	579	77	6012	0.01209	0.012808	ENSMUSP00000083474 ENSMUSP00000020312 ENSMUSP00000015981 ENSMUSP00000028882 ENSMUSP00000154338 ENSMUSP00000131297 ENSMUSP00000129001	ENSMUSP00000020673 ENSMUSP00000134023 ENSMUSP00000016463 ENSMUSP00000025891 ENSMUSP00000034049 ENSMUSP00000019514 ENSMUSP00000009036 ENSMUSP00000068895 ENSMUSP00000020649 ENSMUSP00000039109 ENSMUSP00000029382 ENSMUSP00000156154 ENSMUSP00000083474 ENSMUSP00000134004 ENSMUSP00000056774 ENSMUSP00000015100 ENSMUSP00000049584 ENSMUSP00000051619 ENSMUSP00000071040 ENSMUSP00000038150 ENSMUSP00000029445 …	under	0.621494	0.997991	0.0909091
Human Diseases	Cancer: overview	mmu05231	Choline metabolism in cancer	4	579	44	6012	0.006908	0.007319	ENSMUSP00000070868 ENSMUSP00000065719 ENSMUSP00000064423 ENSMUSP00000154338	ENSMUSP00000156154 ENSMUSP00000056774 ENSMUSP00000102106 ENSMUSP00000051619 ENSMUSP00000138788 ENSMUSP00000029445 ENSMUSP00000098058 ENSMUSP00000150147 ENSMUSP00000099510 ENSMUSP00000106934 ENSMUSP00000038225 ENSMUSP00000035037 ENSMUSP00000107339 ENSMUSP00000026572 ENSMUSP00000081263 ENSMUSP00000102852 ENSMUSP00000033505 ENSMUSP00000078721 ENSMUSP00000036384 ENSMUSP00000103274 ENSMUSP00000101315 …	under	0.623837	0.997991	0.0909091
Cellular Processes	Cellular community - eukaryotes	mmu04550	Signaling pathways regulating pluripotency of stem cells	3	579	33	6012	0.005181	0.005489	ENSMUSP00000058629 ENSMUSP00000028071 ENSMUSP00000109884	ENSMUSP00000099842 ENSMUSP00000156154 ENSMUSP00000056774 ENSMUSP00000102106 ENSMUSP00000051619 ENSMUSP00000029445 ENSMUSP00000035037 ENSMUSP00000061958 ENSMUSP00000107339 ENSMUSP00000026572 ENSMUSP00000110398 ENSMUSP00000101315 ENSMUSP00000120152 ENSMUSP00000005066 ENSMUSP00000025393 ENSMUSP00000108571 ENSMUSP00000103878 ENSMUSP00000121111 ENSMUSP00000103981 ENSMUSP00000058629 ENSMUSP00000001780 …	under	0.628751	0.997991	0.0909091
Cellular Processes	Transport and catabolism	mmu04140	Autophagy - animal	8	579	89	6012	0.013817	0.014804	ENSMUSP00000015981 ENSMUSP00000095329 ENSMUSP00000045201 ENSMUSP00000033570 ENSMUSP00000040307 ENSMUSP00000154338 ENSMUSP00000139608 ENSMUSP00000004949	ENSMUSP00000121203 ENSMUSP00000006235 ENSMUSP00000109230 ENSMUSP00000107829 ENSMUSP00000127330 ENSMUSP00000071214 ENSMUSP00000156154 ENSMUSP00000082682 ENSMUSP00000056774 ENSMUSP00000020608 ENSMUSP00000030399 ENSMUSP00000152169 ENSMUSP00000005606 ENSMUSP00000009774 ENSMUSP00000033824 ENSMUSP00000051619 ENSMUSP00000003121 ENSMUSP00000020316 ENSMUSP00000029445 ENSMUSP00000065456 ENSMUSP00000099573 …	under	0.635296	0.997991	0.0898876
Genetic Information Processing	Transcription	mmu03022	Basal transcription factors	2	579	22	6012	0.003454	0.003659	ENSMUSP00000138108 ENSMUSP00000126284	ENSMUSP00000049625 ENSMUSP00000029938 ENSMUSP00000002733 ENSMUSP00000021018 ENSMUSP00000054380 ENSMUSP00000086312 ENSMUSP00000001565 ENSMUSP00000113501 ENSMUSP00000090726 ENSMUSP00000131136 ENSMUSP00000025241 ENSMUSP00000031333 ENSMUSP00000021523 ENSMUSP00000109123 ENSMUSP00000048016 ENSMUSP00000138108 ENSMUSP00000038610 ENSMUSP00000026027 ENSMUSP00000098895 ENSMUSP00000118105 ENSMUSP00000126284 …	under	0.640091	0.997991	0.0909091
Cellular Processes	Cell growth and death	mmu04115	p53 signaling pathway	2	579	22	6012	0.003454	0.003659	ENSMUSP00000050374 ENSMUSP00000154338	ENSMUSP00000108262 ENSMUSP00000125291 ENSMUSP00000140546 ENSMUSP00000033093 ENSMUSP00000126024 ENSMUSP00000050374 ENSMUSP00000147767 ENSMUSP00000097287 ENSMUSP00000078998 ENSMUSP00000026416 ENSMUSP00000039586 ENSMUSP00000007803 ENSMUSP00000044903 ENSMUSP00000020099 ENSMUSP00000006911 ENSMUSP00000013807 ENSMUSP00000154338 ENSMUSP00000002152 ENSMUSP00000066679 ENSMUSP00000030747 ENSMUSP00000076160 …	under	0.640091	0.997991	0.0909091
Organismal Systems	Digestive system	mmu04976	Bile secretion	2	579	22	6012	0.003454	0.003659	ENSMUSP00000022176 ENSMUSP00000034713	ENSMUSP00000039657 ENSMUSP00000099922 ENSMUSP00000083077 ENSMUSP00000009058 ENSMUSP00000136343 ENSMUSP00000041204 ENSMUSP00000047551 ENSMUSP00000045864 ENSMUSP00000130594 ENSMUSP00000085179 ENSMUSP00000005606 ENSMUSP00000034983 ENSMUSP00000099573 ENSMUSP00000058683 ENSMUSP00000042186 ENSMUSP00000078972 ENSMUSP00000022176 ENSMUSP00000034713 ENSMUSP00000030669 ENSMUSP00000030398 ENSMUSP00000031822 …	under	0.640091	0.997991	0.0909091
Human Diseases	Substance dependence	mmu05032	Morphine addiction	2	579	22	6012	0.003454	0.003659	ENSMUSP00000121127 ENSMUSP00000087485	ENSMUSP00000142326 ENSMUSP00000101241 ENSMUSP00000106656 ENSMUSP00000000001 ENSMUSP00000130594 ENSMUSP00000085179 ENSMUSP00000005606 ENSMUSP00000138788 ENSMUSP00000099573 ENSMUSP00000136963 ENSMUSP00000086114 ENSMUSP00000104208 ENSMUSP00000145346 ENSMUSP00000121127 ENSMUSP00000125697 ENSMUSP00000081956 ENSMUSP00000087485 ENSMUSP00000001115 ENSMUSP00000103340 ENSMUSP00000003313 ENSMUSP00000114945 …	under	0.640091	0.997991	0.0909091
Human Diseases	Endocrine and metabolic disease	mmu04934	Cushing syndrome	4	579	45	6012	0.006908	0.007485	ENSMUSP00000034713 ENSMUSP00000058629 ENSMUSP00000109884 ENSMUSP00000105736	ENSMUSP00000142326 ENSMUSP00000027810 ENSMUSP00000045864 ENSMUSP00000000001 ENSMUSP00000156154 ENSMUSP00000130594 ENSMUSP00000085179 ENSMUSP00000025912 ENSMUSP00000025541 ENSMUSP00000005606 ENSMUSP00000049584 ENSMUSP00000051619 ENSMUSP00000066238 ENSMUSP00000038150 ENSMUSP00000088174 ENSMUSP00000099573 ENSMUSP00000129999 ENSMUSP00000043190 ENSMUSP00000126024 ENSMUSP00000113807 ENSMUSP00000110398 …	under	0.641825	0.997991	0.0888889
Organismal Systems	Immune system	mmu04666	Fc gamma R-mediated phagocytosis	6	579	68	6012	0.010363	0.011311	ENSMUSP00000055637 ENSMUSP00000027966 ENSMUSP00000070868 ENSMUSP00000106087 ENSMUSP00000065719 ENSMUSP00000064423	ENSMUSP00000138350 ENSMUSP00000144561 ENSMUSP00000079991 ENSMUSP00000000137 ENSMUSP00000109451 ENSMUSP00000090245 ENSMUSP00000137503 ENSMUSP00000127941 ENSMUSP00000072199 ENSMUSP00000100075 ENSMUSP00000107829 ENSMUSP00000147514 ENSMUSP00000076933 ENSMUSP00000003370 ENSMUSP00000005889 ENSMUSP00000113852 ENSMUSP00000016094 ENSMUSP00000143438 ENSMUSP00000048057 ENSMUSP00000156154 ENSMUSP00000081531 …	under	0.650605	0.997991	0.0882353
Metabolism	Carbohydrate metabolism	mmu00562	Inositol phosphate metabolism	4	579	46	6012	0.006908	0.007651	ENSMUSP00000081122 ENSMUSP00000069851 ENSMUSP00000111457 ENSMUSP00000105736	ENSMUSP00000079991 ENSMUSP00000127941 ENSMUSP00000036162 ENSMUSP00000082288 ENSMUSP00000048057 ENSMUSP00000025912 ENSMUSP00000113308 ENSMUSP00000068174 ENSMUSP00000006912 ENSMUSP00000018691 ENSMUSP00000038225 ENSMUSP00000035037 ENSMUSP00000123539 ENSMUSP00000102852 ENSMUSP00000126092 ENSMUSP00000101315 ENSMUSP00000013970 ENSMUSP00000019283 ENSMUSP00000095314 ENSMUSP00000153403 ENSMUSP00000033700 …	under	0.65924	0.997991	0.0869565
Human Diseases	Endocrine and metabolic disease	mmu04931	Insulin resistance	4	579	46	6012	0.006908	0.007651	ENSMUSP00000083474 ENSMUSP00000080974 ENSMUSP00000025263 ENSMUSP00000025500	ENSMUSP00000071231 ENSMUSP00000038555 ENSMUSP00000107829 ENSMUSP00000035743 ENSMUSP00000033671 ENSMUSP00000029053 ENSMUSP00000119328 ENSMUSP00000039109 ENSMUSP00000083474 ENSMUSP00000056774 ENSMUSP00000078971 ENSMUSP00000015100 ENSMUSP00000080974 ENSMUSP00000138788 ENSMUSP00000029812 ENSMUSP00000099510 ENSMUSP00000045409 ENSMUSP00000148768 ENSMUSP00000058757 ENSMUSP00000025835 ENSMUSP00000035037 …	under	0.65924	0.997991	0.0869565
Organismal Systems	Nervous system	mmu04727	GABAergic synapse	2	579	23	6012	0.003454	0.003826	ENSMUSP00000121127 ENSMUSP00000087485	ENSMUSP00000099364 ENSMUSP00000142326 ENSMUSP00000101241 ENSMUSP00000110158 ENSMUSP00000106656 ENSMUSP00000000001 ENSMUSP00000110155 ENSMUSP00000130594 ENSMUSP00000005606 ENSMUSP00000138788 ENSMUSP00000099573 ENSMUSP00000145346 ENSMUSP00000121127 ENSMUSP00000083375 ENSMUSP00000106018 ENSMUSP00000105155 ENSMUSP00000125697 ENSMUSP00000087485 ENSMUSP00000018711 ENSMUSP00000023099 ENSMUSP00000034428 …	under	0.664465	0.997991	0.0869565
Organismal Systems	Digestive system	mmu04971	Gastric acid secretion	2	579	23	6012	0.003454	0.003826	ENSMUSP00000071486 ENSMUSP00000105736	ENSMUSP00000039657 ENSMUSP00000071486 ENSMUSP00000099922 ENSMUSP00000083077 ENSMUSP00000063734 ENSMUSP00000142326 ENSMUSP00000019514 ENSMUSP00000000001 ENSMUSP00000130594 ENSMUSP00000085179 ENSMUSP00000025912 ENSMUSP00000025541 ENSMUSP00000005606 ENSMUSP00000049584 ENSMUSP00000038150 ENSMUSP00000138788 ENSMUSP00000034983 ENSMUSP00000099573 ENSMUSP00000129999 ENSMUSP00000078972 ENSMUSP00000099583 …	under	0.664465	0.997991	0.0869565
Environmental Information Processing	Signal transduction	mmu04630	JAK-STAT signaling pathway	3	579	35	6012	0.005181	0.005822	ENSMUSP00000023693 ENSMUSP00000112675 ENSMUSP00000120525	ENSMUSP00000004377 ENSMUSP00000141132 ENSMUSP00000099842 ENSMUSP00000056774 ENSMUSP00000102106 ENSMUSP00000102980 ENSMUSP00000102981 ENSMUSP00000100872 ENSMUSP00000099510 ENSMUSP00000058757 ENSMUSP00000035037 ENSMUSP00000089708 ENSMUSP00000026572 ENSMUSP00000044048 ENSMUSP00000101315 ENSMUSP00000023165 ENSMUSP00000120152 ENSMUSP00000150354 ENSMUSP00000066789 ENSMUSP00000108571 ENSMUSP00000036326 …	under	0.668897	0.997991	0.0857143
Environmental Information Processing	Signal transduction	mmu04371	Apelin signaling pathway	5	579	58	6012	0.008636	0.009647	ENSMUSP00000121127 ENSMUSP00000018610 ENSMUSP00000087485 ENSMUSP00000099617 ENSMUSP00000105736	ENSMUSP00000142326 ENSMUSP00000019514 ENSMUSP00000101241 ENSMUSP00000020930 ENSMUSP00000106656 ENSMUSP00000000001 ENSMUSP00000156154 ENSMUSP00000130594 ENSMUSP00000025912 ENSMUSP00000025541 ENSMUSP00000005606 ENSMUSP00000049584 ENSMUSP00000051619 ENSMUSP00000038150 ENSMUSP00000029445 ENSMUSP00000099573 ENSMUSP00000099510 ENSMUSP00000099878 ENSMUSP00000090086 ENSMUSP00000107339 ENSMUSP00000026572 …	under	0.669107	0.997991	0.0862069
Metabolism	Glycan biosynthesis and metabolism	mmu00563	Glycosylphosphatidylinositol (GPI)-anchor biosynthesis	1	579	11	6012	0.001727	0.00183	ENSMUSP00000138885	ENSMUSP00000095346 ENSMUSP00000044871 ENSMUSP00000023221 ENSMUSP00000099390 ENSMUSP00000139638 ENSMUSP00000076816 ENSMUSP00000113818 ENSMUSP00000052838 ENSMUSP00000138885 ENSMUSP00000045351 ENSMUSP00000095713	under	0.672053	0.997991	0.0909091
Human Diseases	Cancer: overview	mmu05205	Proteoglycans in cancer	8	579	92	6012	0.013817	0.015303	ENSMUSP00000071486 ENSMUSP00000054499 ENSMUSP00000083474 ENSMUSP00000025263 ENSMUSP00000017153 ENSMUSP00000058629 ENSMUSP00000007799 ENSMUSP00000109884	ENSMUSP00000109938 ENSMUSP00000128278 ENSMUSP00000071486 ENSMUSP00000113071 ENSMUSP00000052020 ENSMUSP00000028499 ENSMUSP00000128249 ENSMUSP00000021062 ENSMUSP00000079991 ENSMUSP00000054499 ENSMUSP00000087457 ENSMUSP00000152813 ENSMUSP00000063734 ENSMUSP00000004377 ENSMUSP00000096280 ENSMUSP00000110680 ENSMUSP00000023128 ENSMUSP00000005889 ENSMUSP00000039109 ENSMUSP00000156154 ENSMUSP00000069549 …	under	0.672643	0.997991	0.0869565
Organismal Systems	Immune system	mmu04659	Th17 cell differentiation	3	579	36	6012	0.005181	0.005988	ENSMUSP00000028881 ENSMUSP00000054637 ENSMUSP00000129001	ENSMUSP00000024739 ENSMUSP00000091921 ENSMUSP00000141132 ENSMUSP00000099842 ENSMUSP00000156154 ENSMUSP00000051619 ENSMUSP00000071040 ENSMUSP00000102980 ENSMUSP00000102981 ENSMUSP00000029812 ENSMUSP00000099510 ENSMUSP00000002678 ENSMUSP00000089708 ENSMUSP00000061958 ENSMUSP00000025867 ENSMUSP00000033939 ENSMUSP00000004330 ENSMUSP00000125722 ENSMUSP00000041008 ENSMUSP00000120152 ENSMUSP00000025393 …	under	0.687744	0.997991	0.0833333
Human Diseases	Immune disease	mmu05322	Systemic lupus erythematosus	3	579	36	6012	0.005181	0.005988	ENSMUSP00000025263 ENSMUSP00000033264 ENSMUSP00000028233	ENSMUSP00000066068 ENSMUSP00000021554 ENSMUSP00000016081 ENSMUSP00000024988 ENSMUSP00000088365 ENSMUSP00000085006 ENSMUSP00000106099 ENSMUSP00000078239 ENSMUSP00000088287 ENSMUSP00000115666 ENSMUSP00000020397 ENSMUSP00000029748 ENSMUSP00000017799 ENSMUSP00000151536 ENSMUSP00000124509 ENSMUSP00000051432 ENSMUSP00000074310 ENSMUSP00000027165 ENSMUSP00000041008 ENSMUSP00000025263 ENSMUSP00000036907 …	under	0.687744	0.997991	0.0833333
Human Diseases	Infectious disease: viral	mmu05170	Human immunodeficiency virus 1 infection	10	579	117	6012	0.017271	0.019461	ENSMUSP00000121127 ENSMUSP00000025263 ENSMUSP00000099534 ENSMUSP00000074471 ENSMUSP00000087485 ENSMUSP00000040307 ENSMUSP00000124599 ENSMUSP00000004949 ENSMUSP00000131297 ENSMUSP00000129001	ENSMUSP00000028683 ENSMUSP00000009234 ENSMUSP00000003912 ENSMUSP00000079991 ENSMUSP00000025649 ENSMUSP00000022622 ENSMUSP00000142326 ENSMUSP00000059717 ENSMUSP00000031697 ENSMUSP00000147514 ENSMUSP00000019514 ENSMUSP00000101241 ENSMUSP00000003117 ENSMUSP00000106656 ENSMUSP00000025161 ENSMUSP00000000001 ENSMUSP00000156154 ENSMUSP00000034171 ENSMUSP00000134004 ENSMUSP00000110771 ENSMUSP00000128401 …	under	0.702044	0.997991	0.0854701
Metabolism	Carbohydrate metabolism	mmu00650	Butanoate metabolism	1	579	12	6012	0.001727	0.001996	ENSMUSP00000087192	ENSMUSP00000106318 ENSMUSP00000120976 ENSMUSP00000034547 ENSMUSP00000026538 ENSMUSP00000031524 ENSMUSP00000030432 ENSMUSP00000029610 ENSMUSP00000136944 ENSMUSP00000007005 ENSMUSP00000031445 ENSMUSP00000087192 ENSMUSP00000021370	under	0.703694	0.997991	0.0833333
Human Diseases	Cancer: overview	mmu05206	MicroRNAs in cancer	6	579	72	6012	0.010363	0.011976	ENSMUSP00000035065 ENSMUSP00000030636 ENSMUSP00000055714 ENSMUSP00000028071 ENSMUSP00000042987 ENSMUSP00000113252	ENSMUSP00000028062 ENSMUSP00000128249 ENSMUSP00000079991 ENSMUSP00000063734 ENSMUSP00000090245 ENSMUSP00000009058 ENSMUSP00000135647 ENSMUSP00000097743 ENSMUSP00000023128 ENSMUSP00000004202 ENSMUSP00000109325 ENSMUSP00000110158 ENSMUSP00000041204 ENSMUSP00000020991 ENSMUSP00000109326 ENSMUSP00000110155 ENSMUSP00000156154 ENSMUSP00000069549 ENSMUSP00000056774 ENSMUSP00000102106 ENSMUSP00000078741 …	under	0.705073	0.997991	0.0833333
Cellular Processes	Cellular community - eukaryotes	mmu04540	Gap junction	3	579	37	6012	0.005181	0.006154	ENSMUSP00000078429 ENSMUSP00000064536 ENSMUSP00000105736	ENSMUSP00000076777 ENSMUSP00000051033 ENSMUSP00000078429 ENSMUSP00000001566 ENSMUSP00000142326 ENSMUSP00000060246 ENSMUSP00000042342 ENSMUSP00000000001 ENSMUSP00000156154 ENSMUSP00000130594 ENSMUSP00000085179 ENSMUSP00000025912 ENSMUSP00000102106 ENSMUSP00000025541 ENSMUSP00000005606 ENSMUSP00000049584 ENSMUSP00000051619 ENSMUSP00000038150 ENSMUSP00000138788 ENSMUSP00000029445 ENSMUSP00000099573 …	under	0.705776	0.997991	0.0810811
Human Diseases	Cancer: overview	mmu05200	Pathways in cancer	15	579	174	6012	0.025907	0.028942	ENSMUSP00000054499 ENSMUSP00000025523 ENSMUSP00000035065 ENSMUSP00000121127 ENSMUSP00000018610 ENSMUSP00000023693 ENSMUSP00000087485 ENSMUSP00000058629 ENSMUSP00000094225 ENSMUSP00000042987 ENSMUSP00000130759 ENSMUSP00000004949 ENSMUSP00000109884 ENSMUSP00000113252 ENSMUSP00000105736	ENSMUSP00000117616 ENSMUSP00000024739 ENSMUSP00000020238 ENSMUSP00000091921 ENSMUSP00000028499 ENSMUSP00000079991 ENSMUSP00000054499 ENSMUSP00000087457 ENSMUSP00000152813 ENSMUSP00000029549 ENSMUSP00000096280 ENSMUSP00000142326 ENSMUSP00000027810 ENSMUSP00000031697 ENSMUSP00000019514 ENSMUSP00000101241 ENSMUSP00000141132 ENSMUSP00000099842 ENSMUSP00000020930 ENSMUSP00000106656 ENSMUSP00000118874 …	under	0.714464	0.997991	0.0862069
Cellular Processes	Cellular community - eukaryotes	mmu04510	Focal adhesion	7	579	85	6012	0.01209	0.014138	ENSMUSP00000071486 ENSMUSP00000054499 ENSMUSP00000119441 ENSMUSP00000083474 ENSMUSP00000005611 ENSMUSP00000145451 ENSMUSP00000007799	ENSMUSP00000109938 ENSMUSP00000030187 ENSMUSP00000071486 ENSMUSP00000066068 ENSMUSP00000021554 ENSMUSP00000052020 ENSMUSP00000022369 ENSMUSP00000028499 ENSMUSP00000054499 ENSMUSP00000087457 ENSMUSP00000152813 ENSMUSP00000025337 ENSMUSP00000110680 ENSMUSP00000023128 ENSMUSP00000068895 ENSMUSP00000005889 ENSMUSP00000099718 ENSMUSP00000119441 ENSMUSP00000039109 ENSMUSP00000156154 ENSMUSP00000069549 …	under	0.723533	0.997991	0.0823529
Genetic Information Processing	Replication and repair	mmu03030	DNA replication	2	579	26	6012	0.003454	0.004325	ENSMUSP00000059192 ENSMUSP00000000505	ENSMUSP00000027601 ENSMUSP00000028817 ENSMUSP00000061923 ENSMUSP00000126135 ENSMUSP00000059192 ENSMUSP00000117246 ENSMUSP00000023867 ENSMUSP00000000767 ENSMUSP00000110427 ENSMUSP00000023353 ENSMUSP00000000505 ENSMUSP00000039776 ENSMUSP00000030091 ENSMUSP00000022499 ENSMUSP00000110995 ENSMUSP00000083652 ENSMUSP00000136556 ENSMUSP00000027312 ENSMUSP00000039621 ENSMUSP00000099621 ENSMUSP00000012627 …	under	0.729641	0.997991	0.0769231
Metabolism	Lipid metabolism	mmu00100	Steroid biosynthesis	1	579	13	6012	0.001727	0.002162	ENSMUSP00000027989	ENSMUSP00000140721 ENSMUSP00000005003 ENSMUSP00000001507 ENSMUSP00000046856 ENSMUSP00000136967 ENSMUSP00000146947 ENSMUSP00000033715 ENSMUSP00000034015 ENSMUSP00000027989 ENSMUSP00000033509 ENSMUSP00000038063 ENSMUSP00000057354 ENSMUSP00000127367	under	0.732288	0.997991	0.0769231
Human Diseases	Immune disease	mmu05320	Autoimmune thyroid disease	1	579	13	6012	0.001727	0.002162	ENSMUSP00000131297	ENSMUSP00000134004 ENSMUSP00000017799 ENSMUSP00000027165 ENSMUSP00000080159 ENSMUSP00000099739 ENSMUSP00000041008 ENSMUSP00000072942 ENSMUSP00000134582 ENSMUSP00000046105 ENSMUSP00000087047 ENSMUSP00000109389 ENSMUSP00000035687 ENSMUSP00000131297	under	0.732288	0.997991	0.0769231
Organismal Systems	Nervous system	mmu04728	Dopaminergic synapse	4	579	51	6012	0.006908	0.008483	ENSMUSP00000083474 ENSMUSP00000121127 ENSMUSP00000087485 ENSMUSP00000105736	ENSMUSP00000025083 ENSMUSP00000142326 ENSMUSP00000019514 ENSMUSP00000101241 ENSMUSP00000007708 ENSMUSP00000106656 ENSMUSP00000026013 ENSMUSP00000039109 ENSMUSP00000000001 ENSMUSP00000083474 ENSMUSP00000085179 ENSMUSP00000025912 ENSMUSP00000020608 ENSMUSP00000025541 ENSMUSP00000015100 ENSMUSP00000005606 ENSMUSP00000009774 ENSMUSP00000049584 ENSMUSP00000071040 ENSMUSP00000038150 ENSMUSP00000138788 …	under	0.73755	0.997991	0.0784314
Human Diseases	Substance dependence	mmu05034	Alcoholism	4	579	51	6012	0.006908	0.008483	ENSMUSP00000083474 ENSMUSP00000121127 ENSMUSP00000112685 ENSMUSP00000087485	ENSMUSP00000016081 ENSMUSP00000142326 ENSMUSP00000019514 ENSMUSP00000101241 ENSMUSP00000085006 ENSMUSP00000106099 ENSMUSP00000078239 ENSMUSP00000106656 ENSMUSP00000026013 ENSMUSP00000039109 ENSMUSP00000000001 ENSMUSP00000156154 ENSMUSP00000083474 ENSMUSP00000085179 ENSMUSP00000102106 ENSMUSP00000088287 ENSMUSP00000015100 ENSMUSP00000005606 ENSMUSP00000099657 ENSMUSP00000051619 ENSMUSP00000029445 …	under	0.73755	0.997991	0.0784314
Organismal Systems	Aging	mmu04211	Longevity regulating pathway	3	579	39	6012	0.005181	0.006487	ENSMUSP00000053403 ENSMUSP00000119057 ENSMUSP00000154338	ENSMUSP00000028610 ENSMUSP00000130594 ENSMUSP00000056774 ENSMUSP00000007012 ENSMUSP00000005606 ENSMUSP00000029445 ENSMUSP00000029812 ENSMUSP00000099573 ENSMUSP00000099510 ENSMUSP00000042875 ENSMUSP00000033093 ENSMUSP00000035037 ENSMUSP00000025867 ENSMUSP00000088837 ENSMUSP00000107339 ENSMUSP00000026572 ENSMUSP00000101315 ENSMUSP00000044769 ENSMUSP00000132499 ENSMUSP00000029803 ENSMUSP00000026671 …	under	0.739429	0.997991	0.0769231
Organismal Systems	Immune system	mmu04664	Fc epsilon RI signaling pathway	3	579	39	6012	0.005181	0.006487	ENSMUSP00000025263 ENSMUSP00000070868 ENSMUSP00000071130	ENSMUSP00000079991 ENSMUSP00000127941 ENSMUSP00000100075 ENSMUSP00000005889 ENSMUSP00000113852 ENSMUSP00000156154 ENSMUSP00000056774 ENSMUSP00000102106 ENSMUSP00000033617 ENSMUSP00000051619 ENSMUSP00000029445 ENSMUSP00000098058 ENSMUSP00000035037 ENSMUSP00000061958 ENSMUSP00000107339 ENSMUSP00000026572 ENSMUSP00000036270 ENSMUSP00000057707 ENSMUSP00000036384 ENSMUSP00000025263 ENSMUSP00000101315 …	under	0.739429	0.997991	0.0769231
Organismal Systems	Nervous system	mmu04725	Cholinergic synapse	3	579	39	6012	0.005181	0.006487	ENSMUSP00000121127 ENSMUSP00000087485 ENSMUSP00000105736	ENSMUSP00000142326 ENSMUSP00000101241 ENSMUSP00000106656 ENSMUSP00000000001 ENSMUSP00000156154 ENSMUSP00000130594 ENSMUSP00000025912 ENSMUSP00000056774 ENSMUSP00000025541 ENSMUSP00000005606 ENSMUSP00000049584 ENSMUSP00000051619 ENSMUSP00000038150 ENSMUSP00000138788 ENSMUSP00000029445 ENSMUSP00000099573 ENSMUSP00000129999 ENSMUSP00000043190 ENSMUSP00000035037 ENSMUSP00000107339 ENSMUSP00000026572 …	under	0.739429	0.997991	0.0769231
Human Diseases	Infectious disease: viral	mmu05166	Human T-cell leukemia virus 1 infection	8	579	98	6012	0.013817	0.016301	ENSMUSP00000083587 ENSMUSP00000119441 ENSMUSP00000111309 ENSMUSP00000025263 ENSMUSP00000099534 ENSMUSP00000031072 ENSMUSP00000131297 ENSMUSP00000129001	ENSMUSP00000030187 ENSMUSP00000000299 ENSMUSP00000020637 ENSMUSP00000003912 ENSMUSP00000020673 ENSMUSP00000134023 ENSMUSP00000016463 ENSMUSP00000034049 ENSMUSP00000101913 ENSMUSP00000099933 ENSMUSP00000009036 ENSMUSP00000099842 ENSMUSP00000083587 ENSMUSP00000119441 ENSMUSP00000156154 ENSMUSP00000072859 ENSMUSP00000148419 ENSMUSP00000130594 ENSMUSP00000134004 ENSMUSP00000056774 ENSMUSP00000005606 …	under	0.739994	0.997991	0.0816327
Cellular Processes	Cell growth and death	mmu04210	Apoptosis	6	579	75	6012	0.010363	0.012475	ENSMUSP00000071486 ENSMUSP00000078429 ENSMUSP00000025263 ENSMUSP00000124258 ENSMUSP00000095329 ENSMUSP00000130759	ENSMUSP00000071486 ENSMUSP00000092697 ENSMUSP00000029699 ENSMUSP00000025486 ENSMUSP00000057291 ENSMUSP00000121203 ENSMUSP00000076777 ENSMUSP00000027777 ENSMUSP00000006235 ENSMUSP00000051033 ENSMUSP00000025891 ENSMUSP00000078429 ENSMUSP00000041104 ENSMUSP00000015667 ENSMUSP00000071214 ENSMUSP00000068895 ENSMUSP00000016400 ENSMUSP00000156154 ENSMUSP00000032779 ENSMUSP00000056774 ENSMUSP00000125291 …	under	0.741966	0.997991	0.08
Metabolism	Glycan biosynthesis and metabolism	mmu00513	Various types of N-glycan biosynthesis	2	579	27	6012	0.003454	0.004491	ENSMUSP00000026262 ENSMUSP00000033643	ENSMUSP00000032143 ENSMUSP00000026262 ENSMUSP00000022169 ENSMUSP00000083928 ENSMUSP00000113116 ENSMUSP00000112081 ENSMUSP00000030538 ENSMUSP00000036996 ENSMUSP00000035010 ENSMUSP00000151568 ENSMUSP00000043580 ENSMUSP00000080484 ENSMUSP00000057905 ENSMUSP00000095949 ENSMUSP00000022781 ENSMUSP00000050979 ENSMUSP00000097770 ENSMUSP00000136327 ENSMUSP00000072382 ENSMUSP00000008907 ENSMUSP00000034561 …	under	0.748847	0.997991	0.0740741
Environmental Information Processing	Signal transduction	mmu04350	TGF-beta signaling pathway	2	579	27	6012	0.003454	0.004491	ENSMUSP00000025263 ENSMUSP00000023809	ENSMUSP00000031697 ENSMUSP00000007708 ENSMUSP00000156154 ENSMUSP00000069549 ENSMUSP00000028633 ENSMUSP00000020608 ENSMUSP00000009774 ENSMUSP00000007959 ENSMUSP00000051619 ENSMUSP00000002678 ENSMUSP00000038744 ENSMUSP00000025263 ENSMUSP00000023165 ENSMUSP00000025393 ENSMUSP00000007757 ENSMUSP00000066789 ENSMUSP00000044903 ENSMUSP00000001326 ENSMUSP00000022217 ENSMUSP00000015003 ENSMUSP00000065798 …	under	0.748847	0.997991	0.0740741
Metabolism	Glycan biosynthesis and metabolism	mmu00511	Other glycan degradation	1	579	14	6012	0.001727	0.002329	ENSMUSP00000026262	ENSMUSP00000034121 ENSMUSP00000026262 ENSMUSP00000022169 ENSMUSP00000029814 ENSMUSP00000031002 ENSMUSP00000076589 ENSMUSP00000055803 ENSMUSP00000033920 ENSMUSP00000007253 ENSMUSP00000117538 ENSMUSP00000125478 ENSMUSP00000030434 ENSMUSP00000055519 ENSMUSP00000045222	under	0.758126	0.997991	0.0714286
Metabolism	Metabolism of cofactors and vitamins	mmu00790	Folate biosynthesis	1	579	14	6012	0.001727	0.002329	ENSMUSP00000087405	ENSMUSP00000039114 ENSMUSP00000100045 ENSMUSP00000145412 ENSMUSP00000015950 ENSMUSP00000040244 ENSMUSP00000049394 ENSMUSP00000133694 ENSMUSP00000063609 ENSMUSP00000115392 ENSMUSP00000022218 ENSMUSP00000106018 ENSMUSP00000095843 ENSMUSP00000087405 ENSMUSP00000034570	under	0.758126	0.997991	0.0714286
Genetic Information Processing	Replication and repair	mmu03410	Base excision repair	1	579	14	6012	0.001727	0.002329	ENSMUSP00000124258	ENSMUSP00000027777 ENSMUSP00000082682 ENSMUSP00000028817 ENSMUSP00000042602 ENSMUSP00000117246 ENSMUSP00000124258 ENSMUSP00000039776 ENSMUSP00000030091 ENSMUSP00000108098 ENSMUSP00000033938 ENSMUSP00000021039 ENSMUSP00000136972 ENSMUSP00000121000 ENSMUSP00000099986	under	0.758126	0.997991	0.0714286
Organismal Systems	Immune system	mmu04650	Natural killer cell mediated cytotoxicity	4	579	53	6012	0.006908	0.008816	ENSMUSP00000083587 ENSMUSP00000025263 ENSMUSP00000023693 ENSMUSP00000129001	ENSMUSP00000000299 ENSMUSP00000079991 ENSMUSP00000004377 ENSMUSP00000022622 ENSMUSP00000101913 ENSMUSP00000005889 ENSMUSP00000113852 ENSMUSP00000083587 ENSMUSP00000156154 ENSMUSP00000134004 ENSMUSP00000056774 ENSMUSP00000102106 ENSMUSP00000051619 ENSMUSP00000071040 ENSMUSP00000138788 ENSMUSP00000029445 ENSMUSP00000098058 ENSMUSP00000064241 ENSMUSP00000058757 ENSMUSP00000035037 ENSMUSP00000107339 …	under	0.764798	0.997991	0.0754717
Organismal Systems	Circulatory system	mmu04270	Vascular smooth muscle contraction	3	579	41	6012	0.005181	0.00682	ENSMUSP00000083474 ENSMUSP00000070868 ENSMUSP00000105736	ENSMUSP00000016771 ENSMUSP00000152813 ENSMUSP00000096280 ENSMUSP00000107829 ENSMUSP00000019514 ENSMUSP00000020930 ENSMUSP00000151915 ENSMUSP00000039109 ENSMUSP00000156154 ENSMUSP00000069549 ENSMUSP00000083474 ENSMUSP00000130594 ENSMUSP00000085179 ENSMUSP00000025912 ENSMUSP00000025541 ENSMUSP00000015100 ENSMUSP00000005606 ENSMUSP00000007959 ENSMUSP00000049584 ENSMUSP00000051619 ENSMUSP00000038150 …	under	0.769958	0.997991	0.0731707
Organismal Systems	Excretory system	mmu04960	Aldosterone-regulated sodium reabsorption	1	579	15	6012	0.001727	0.002495	ENSMUSP00000050374	ENSMUSP00000039657 ENSMUSP00000099922 ENSMUSP00000083077 ENSMUSP00000156154 ENSMUSP00000056774 ENSMUSP00000051619 ENSMUSP00000138788 ENSMUSP00000034983 ENSMUSP00000035037 ENSMUSP00000088837 ENSMUSP00000107339 ENSMUSP00000050374 ENSMUSP00000101315 ENSMUSP00000103878 ENSMUSP00000099991	under	0.781475	0.997991	0.0666667
Metabolism	Amino acid metabolism	mmu00270	Cysteine and methionine metabolism	2	579	29	6012	0.003454	0.004824	ENSMUSP00000110897 ENSMUSP00000129704	ENSMUSP00000019323 ENSMUSP00000034097 ENSMUSP00000064755 ENSMUSP00000148107 ENSMUSP00000004202 ENSMUSP00000026196 ENSMUSP00000127198 ENSMUSP00000020991 ENSMUSP00000033098 ENSMUSP00000029490 ENSMUSP00000025542 ENSMUSP00000110897 ENSMUSP00000034905 ENSMUSP00000087118 ENSMUSP00000043061 ENSMUSP00000055743 ENSMUSP00000048222 ENSMUSP00000020957 ENSMUSP00000029769 ENSMUSP00000011055 ENSMUSP00000078630 …	under	0.783756	0.997991	0.0689655
Metabolism	Amino acid metabolism	mmu00310	Lysine degradation	2	579	29	6012	0.003454	0.004824	ENSMUSP00000004968 ENSMUSP00000119057	ENSMUSP00000031411 ENSMUSP00000120976 ENSMUSP00000028004 ENSMUSP00000034547 ENSMUSP00000026538 ENSMUSP00000106481 ENSMUSP00000004968 ENSMUSP00000067767 ENSMUSP00000029610 ENSMUSP00000060346 ENSMUSP00000041260 ENSMUSP00000019199 ENSMUSP00000047923 ENSMUSP00000007005 ENSMUSP00000065089 ENSMUSP00000013931 ENSMUSP00000092769 ENSMUSP00000003907 ENSMUSP00000119057 ENSMUSP00000047672 ENSMUSP00000102906 …	under	0.783756	0.997991	0.0689655
Organismal Systems	Digestive system	mmu04970	Salivary secretion	2	579	29	6012	0.003454	0.004824	ENSMUSP00000099617 ENSMUSP00000105736	ENSMUSP00000039657 ENSMUSP00000099922 ENSMUSP00000020107 ENSMUSP00000083077 ENSMUSP00000019514 ENSMUSP00000130594 ENSMUSP00000085179 ENSMUSP00000025912 ENSMUSP00000025541 ENSMUSP00000005606 ENSMUSP00000049584 ENSMUSP00000038150 ENSMUSP00000138788 ENSMUSP00000089801 ENSMUSP00000034983 ENSMUSP00000099573 ENSMUSP00000078972 ENSMUSP00000028938 ENSMUSP00000089800 ENSMUSP00000099583 ENSMUSP00000030669 …	under	0.783756	0.997991	0.0689655
Organismal Systems	Endocrine system	mmu04920	Adipocytokine signaling pathway	2	579	30	6012	0.003454	0.00499	ENSMUSP00000080974 ENSMUSP00000025263	ENSMUSP00000038555 ENSMUSP00000034046 ENSMUSP00000108528 ENSMUSP00000046585 ENSMUSP00000080974 ENSMUSP00000029812 ENSMUSP00000099510 ENSMUSP00000058757 ENSMUSP00000025835 ENSMUSP00000025867 ENSMUSP00000033939 ENSMUSP00000004330 ENSMUSP00000045291 ENSMUSP00000025263 ENSMUSP00000132499 ENSMUSP00000120152 ENSMUSP00000063166 ENSMUSP00000034359 ENSMUSP00000020634 ENSMUSP00000030336 ENSMUSP00000030784 …	under	0.799559	0.997991	0.0666667
Metabolism	Metabolism of terpenoids and polyketides	mmu00900	Terpenoid backbone biosynthesis	1	579	16	6012	0.001727	0.002661	ENSMUSP00000022176	ENSMUSP00000034547 ENSMUSP00000032065 ENSMUSP00000142770 ENSMUSP00000053900 ENSMUSP00000136944 ENSMUSP00000142393 ENSMUSP00000007005 ENSMUSP00000132780 ENSMUSP00000022176 ENSMUSP00000016138 ENSMUSP00000043390 ENSMUSP00000006692 ENSMUSP00000035498 ENSMUSP00000126603 ENSMUSP00000101511 ENSMUSP00000025823	under	0.802573	0.997991	0.0625
Organismal Systems	Endocrine system	mmu04924	Renin secretion	1	579	16	6012	0.001727	0.002661	ENSMUSP00000105736	ENSMUSP00000006235 ENSMUSP00000142326 ENSMUSP00000019514 ENSMUSP00000000001 ENSMUSP00000085179 ENSMUSP00000025912 ENSMUSP00000025541 ENSMUSP00000005606 ENSMUSP00000049584 ENSMUSP00000071040 ENSMUSP00000038150 ENSMUSP00000099573 ENSMUSP00000125722 ENSMUSP00000099944 ENSMUSP00000099583 ENSMUSP00000105736	under	0.802573	0.997991	0.0625
Cellular Processes	Transport and catabolism	mmu04142	Lysosome	8	579	105	6012	0.013817	0.017465	ENSMUSP00000026262 ENSMUSP00000026613 ENSMUSP00000029900 ENSMUSP00000024932 ENSMUSP00000127646 ENSMUSP00000033160 ENSMUSP00000005173 ENSMUSP00000002274	ENSMUSP00000050220 ENSMUSP00000101105 ENSMUSP00000009234 ENSMUSP00000034121 ENSMUSP00000022196 ENSMUSP00000121203 ENSMUSP00000122474 ENSMUSP00000026262 ENSMUSP00000026613 ENSMUSP00000099399 ENSMUSP00000006235 ENSMUSP00000001802 ENSMUSP00000099381 ENSMUSP00000015667 ENSMUSP00000022169 ENSMUSP00000034000 ENSMUSP00000029814 ENSMUSP00000040756 ENSMUSP00000003117 ENSMUSP00000043167 ENSMUSP00000016400 …	under	0.80571	0.997991	0.0761905
Environmental Information Processing	Signal transduction	mmu04151	PI3K-Akt signaling pathway	8	579	106	6012	0.013817	0.017631	ENSMUSP00000054499 ENSMUSP00000025523 ENSMUSP00000121127 ENSMUSP00000053403 ENSMUSP00000023693 ENSMUSP00000087485 ENSMUSP00000154338 ENSMUSP00000130078	ENSMUSP00000024739 ENSMUSP00000020238 ENSMUSP00000091921 ENSMUSP00000028499 ENSMUSP00000054499 ENSMUSP00000087457 ENSMUSP00000070993 ENSMUSP00000038555 ENSMUSP00000110680 ENSMUSP00000022894 ENSMUSP00000023128 ENSMUSP00000019109 ENSMUSP00000123605 ENSMUSP00000101241 ENSMUSP00000099842 ENSMUSP00000007708 ENSMUSP00000018470 ENSMUSP00000106656 ENSMUSP00000113852 ENSMUSP00000099718 ENSMUSP00000143631 …	under	0.813981	0.997991	0.0754717
Human Diseases	Infectious disease: viral	mmu05161	Hepatitis B	6	579	82	6012	0.010363	0.013639	ENSMUSP00000028259 ENSMUSP00000025263 ENSMUSP00000074471 ENSMUSP00000040307 ENSMUSP00000004949 ENSMUSP00000129001	ENSMUSP00000000804 ENSMUSP00000025649 ENSMUSP00000022622 ENSMUSP00000022894 ENSMUSP00000123605 ENSMUSP00000009036 ENSMUSP00000141132 ENSMUSP00000099842 ENSMUSP00000018470 ENSMUSP00000028259 ENSMUSP00000156154 ENSMUSP00000056774 ENSMUSP00000102106 ENSMUSP00000125291 ENSMUSP00000028817 ENSMUSP00000042433 ENSMUSP00000051619 ENSMUSP00000102980 ENSMUSP00000138788 ENSMUSP00000020316 ENSMUSP00000102981 …	under	0.814854	0.997991	0.0731707
Metabolism	Metabolism of cofactors and vitamins	mmu00860	Porphyrin metabolism	1	579	17	6012	0.001727	0.002828	ENSMUSP00000026613	ENSMUSP00000045841 ENSMUSP00000026613 ENSMUSP00000002064 ENSMUSP00000004172 ENSMUSP00000058683 ENSMUSP00000055455 ENSMUSP00000043092 ENSMUSP00000005548 ENSMUSP00000103068 ENSMUSP00000072863 ENSMUSP00000033717 ENSMUSP00000030446 ENSMUSP00000041820 ENSMUSP00000142979 ENSMUSP00000080081 ENSMUSP00000076575 ENSMUSP00000108143	under	0.821638	0.997991	0.0588235
Human Diseases	Infectious disease: bacterial	mmu05132	Salmonella infection	13	579	166	6012	0.022453	0.027611	ENSMUSP00000071486 ENSMUSP00000078429 ENSMUSP00000056669 ENSMUSP00000027015 ENSMUSP00000025263 ENSMUSP00000028881 ENSMUSP00000074471 ENSMUSP00000022830 ENSMUSP00000127990 ENSMUSP00000097756 ENSMUSP00000005611 ENSMUSP00000040307 ENSMUSP00000004949	ENSMUSP00000090633 ENSMUSP00000109938 ENSMUSP00000018851 ENSMUSP00000071486 ENSMUSP00000024739 ENSMUSP00000052020 ENSMUSP00000138350 ENSMUSP00000020238 ENSMUSP00000091921 ENSMUSP00000034756 ENSMUSP00000113942 ENSMUSP00000025083 ENSMUSP00000032629 ENSMUSP00000000137 ENSMUSP00000109451 ENSMUSP00000076777 ENSMUSP00000152813 ENSMUSP00000109552 ENSMUSP00000137503 ENSMUSP00000035400 ENSMUSP00000090854 …	under	0.822983	0.997991	0.0783133
Human Diseases	Neurodegenerative disease	mmu05017	Spinocerebellar ataxia	6	579	84	6012	0.010363	0.013972	ENSMUSP00000020312 ENSMUSP00000022419 ENSMUSP00000045201 ENSMUSP00000056715 ENSMUSP00000125647 ENSMUSP00000105736	ENSMUSP00000135935 ENSMUSP00000020673 ENSMUSP00000134023 ENSMUSP00000071054 ENSMUSP00000016463 ENSMUSP00000027432 ENSMUSP00000007212 ENSMUSP00000123880 ENSMUSP00000034049 ENSMUSP00000021049 ENSMUSP00000009036 ENSMUSP00000021063 ENSMUSP00000025408 ENSMUSP00000017365 ENSMUSP00000021142 ENSMUSP00000021412 ENSMUSP00000034848 ENSMUSP00000029082 ENSMUSP00000133571 ENSMUSP00000033008 ENSMUSP00000099487 …	under	0.832421	0.997991	0.0714286
Environmental Information Processing	Signal transduction	mmu04022	cGMP-PKG signaling pathway	4	579	59	6012	0.006908	0.009814	ENSMUSP00000083474 ENSMUSP00000022419 ENSMUSP00000129001 ENSMUSP00000105736	ENSMUSP00000039657 ENSMUSP00000099922 ENSMUSP00000020107 ENSMUSP00000135935 ENSMUSP00000083077 ENSMUSP00000020673 ENSMUSP00000134023 ENSMUSP00000152813 ENSMUSP00000016463 ENSMUSP00000142326 ENSMUSP00000034049 ENSMUSP00000019514 ENSMUSP00000009036 ENSMUSP00000020930 ENSMUSP00000021142 ENSMUSP00000039109 ENSMUSP00000000001 ENSMUSP00000156154 ENSMUSP00000069549 ENSMUSP00000083474 ENSMUSP00000130594 …	under	0.833375	0.997991	0.0677966
Human Diseases	Substance dependence	mmu05031	Amphetamine addiction	1	579	18	6012	0.001727	0.002994	ENSMUSP00000083474	ENSMUSP00000019514 ENSMUSP00000026013 ENSMUSP00000039109 ENSMUSP00000083474 ENSMUSP00000085179 ENSMUSP00000015100 ENSMUSP00000005606 ENSMUSP00000099657 ENSMUSP00000071040 ENSMUSP00000138788 ENSMUSP00000099573 ENSMUSP00000129999 ENSMUSP00000019911 ENSMUSP00000125722 ENSMUSP00000099944 ENSMUSP00000040550 ENSMUSP00000142623 ENSMUSP00000058521	under	0.838864	0.997991	0.0555556
		mmu03250	Viral life cycle - HIV-1	2	579	33	6012	0.003454	0.005489	ENSMUSP00000001583 ENSMUSP00000124599	ENSMUSP00000003310 ENSMUSP00000035086 ENSMUSP00000059717 ENSMUSP00000003527 ENSMUSP00000099933 ENSMUSP00000019405 ENSMUSP00000108356 ENSMUSP00000117987 ENSMUSP00000031383 ENSMUSP00000135150 ENSMUSP00000036206 ENSMUSP00000012679 ENSMUSP00000014546 ENSMUSP00000026434 ENSMUSP00000030207 ENSMUSP00000023165 ENSMUSP00000039394 ENSMUSP00000034388 ENSMUSP00000057731 ENSMUSP00000000925 ENSMUSP00000051921 …	under	0.840985	0.997991	0.0606061
Organismal Systems	Nervous system	mmu04720	Long-term potentiation	2	579	33	6012	0.003454	0.005489	ENSMUSP00000083474 ENSMUSP00000105736	ENSMUSP00000019514 ENSMUSP00000033671 ENSMUSP00000119328 ENSMUSP00000039109 ENSMUSP00000156154 ENSMUSP00000083474 ENSMUSP00000025912 ENSMUSP00000025541 ENSMUSP00000015100 ENSMUSP00000005606 ENSMUSP00000049584 ENSMUSP00000051619 ENSMUSP00000071040 ENSMUSP00000066238 ENSMUSP00000038150 ENSMUSP00000138788 ENSMUSP00000088174 ENSMUSP00000029445 ENSMUSP00000099573 ENSMUSP00000129999 ENSMUSP00000107339 …	under	0.840985	0.997991	0.0606061
Organismal Systems	Endocrine system	mmu04922	Glucagon signaling pathway	3	579	47	6012	0.005181	0.007818	ENSMUSP00000050788 ENSMUSP00000026617 ENSMUSP00000105736	ENSMUSP00000034834 ENSMUSP00000128770 ENSMUSP00000011896 ENSMUSP00000071231 ENSMUSP00000038555 ENSMUSP00000148107 ENSMUSP00000019514 ENSMUSP00000035743 ENSMUSP00000033662 ENSMUSP00000022268 ENSMUSP00000150509 ENSMUSP00000021614 ENSMUSP00000085179 ENSMUSP00000025912 ENSMUSP00000020522 ENSMUSP00000103474 ENSMUSP00000025541 ENSMUSP00000005606 ENSMUSP00000049584 ENSMUSP00000071040 ENSMUSP00000038150 …	under	0.844352	0.997991	0.0638298
Human Diseases	Cancer: overview	mmu05203	Viral carcinogenesis	8	579	111	6012	0.013817	0.018463	ENSMUSP00000029900 ENSMUSP00000111309 ENSMUSP00000094225 ENSMUSP00000120525 ENSMUSP00000138108 ENSMUSP00000130759 ENSMUSP00000126284 ENSMUSP00000131297	ENSMUSP00000066068 ENSMUSP00000021554 ENSMUSP00000034834 ENSMUSP00000128770 ENSMUSP00000001460 ENSMUSP00000144561 ENSMUSP00000095433 ENSMUSP00000000804 ENSMUSP00000108011 ENSMUSP00000070993 ENSMUSP00000025649 ENSMUSP00000135647 ENSMUSP00000100075 ENSMUSP00000022894 ENSMUSP00000019109 ENSMUSP00000123605 ENSMUSP00000124382 ENSMUSP00000024988 ENSMUSP00000009036 ENSMUSP00000099842 ENSMUSP00000018470 …	under	0.851342	0.997991	0.0720721
Environmental Information Processing	Signal transduction	mmu04370	VEGF signaling pathway	2	579	34	6012	0.003454	0.005655	ENSMUSP00000035065 ENSMUSP00000070868	ENSMUSP00000079991 ENSMUSP00000156154 ENSMUSP00000056774 ENSMUSP00000054634 ENSMUSP00000051619 ENSMUSP00000071040 ENSMUSP00000138788 ENSMUSP00000029445 ENSMUSP00000098058 ENSMUSP00000035065 ENSMUSP00000016672 ENSMUSP00000035037 ENSMUSP00000061958 ENSMUSP00000107339 ENSMUSP00000026572 ENSMUSP00000148843 ENSMUSP00000125722 ENSMUSP00000036384 ENSMUSP00000035194 ENSMUSP00000101315 ENSMUSP00000070868 …	under	0.85297	0.997991	0.0588235
Organismal Systems	Endocrine system	mmu04910	Insulin signaling pathway	5	579	74	6012	0.008636	0.012309	ENSMUSP00000083474 ENSMUSP00000053403 ENSMUSP00000050788 ENSMUSP00000154338 ENSMUSP00000026617	ENSMUSP00000052872 ENSMUSP00000097282 ENSMUSP00000000642 ENSMUSP00000051215 ENSMUSP00000071231 ENSMUSP00000038555 ENSMUSP00000019514 ENSMUSP00000035743 ENSMUSP00000029053 ENSMUSP00000048057 ENSMUSP00000039109 ENSMUSP00000156154 ENSMUSP00000083474 ENSMUSP00000056774 ENSMUSP00000102106 ENSMUSP00000015100 ENSMUSP00000005606 ENSMUSP00000102288 ENSMUSP00000051619 ENSMUSP00000072136 ENSMUSP00000029445 …	under	0.853321	0.997991	0.0675676
Metabolism	Amino acid metabolism	mmu00250	Alanine, aspartate and glutamate metabolism	1	579	19	6012	0.001727	0.00316	ENSMUSP00000111204	ENSMUSP00000022322 ENSMUSP00000034097 ENSMUSP00000026196 ENSMUSP00000110158 ENSMUSP00000110155 ENSMUSP00000013773 ENSMUSP00000043821 ENSMUSP00000124274 ENSMUSP00000016105 ENSMUSP00000023043 ENSMUSP00000032057 ENSMUSP00000083375 ENSMUSP00000099904 ENSMUSP00000111204 ENSMUSP00000120632 ENSMUSP00000051709 ENSMUSP00000023432 ENSMUSP00000136572 ENSMUSP00000059313	under	0.854429	0.997991	0.0526316
Genetic Information Processing	Transcription	mmu03020	RNA polymerase	1	579	19	6012	0.001727	0.00316	ENSMUSP00000019882	ENSMUSP00000050771 ENSMUSP00000031167 ENSMUSP00000021405 ENSMUSP00000004786 ENSMUSP00000099494 ENSMUSP00000084252 ENSMUSP00000148830 ENSMUSP00000029741 ENSMUSP00000093980 ENSMUSP00000026322 ENSMUSP00000058355 ENSMUSP00000076418 ENSMUSP00000038505 ENSMUSP00000060858 ENSMUSP00000019882 ENSMUSP00000023113 ENSMUSP00000020877 ENSMUSP00000025106 ENSMUSP00000029999	under	0.854429	0.997991	0.0526316
Human Diseases	Endocrine and metabolic disease	mmu04930	Type II diabetes mellitus	1	579	19	6012	0.001727	0.00316	ENSMUSP00000025263	ENSMUSP00000034834 ENSMUSP00000128770 ENSMUSP00000097282 ENSMUSP00000000642 ENSMUSP00000051215 ENSMUSP00000107829 ENSMUSP00000150509 ENSMUSP00000156154 ENSMUSP00000056774 ENSMUSP00000051619 ENSMUSP00000099510 ENSMUSP00000035037 ENSMUSP00000088837 ENSMUSP00000033939 ENSMUSP00000025263 ENSMUSP00000101315 ENSMUSP00000103878 ENSMUSP00000020634 ENSMUSP00000067085	under	0.854429	0.997991	0.0526316
Organismal Systems	Digestive system	mmu04973	Carbohydrate digestion and absorption	1	579	19	6012	0.001727	0.00316	ENSMUSP00000105736	ENSMUSP00000039657 ENSMUSP00000099922 ENSMUSP00000097282 ENSMUSP00000000642 ENSMUSP00000083077 ENSMUSP00000051215 ENSMUSP00000025912 ENSMUSP00000056774 ENSMUSP00000138788 ENSMUSP00000034983 ENSMUSP00000035037 ENSMUSP00000101315 ENSMUSP00000099583 ENSMUSP00000103878 ENSMUSP00000103981 ENSMUSP00000001780 ENSMUSP00000150753 ENSMUSP00000070368 ENSMUSP00000105736	under	0.854429	0.997991	0.0526316
Human Diseases	Cancer: overview	mmu05235	PD-L1 expression and PD-1 checkpoint pathway in cancer	3	579	48	6012	0.005181	0.007984	ENSMUSP00000016640 ENSMUSP00000004949 ENSMUSP00000129001	ENSMUSP00000004377 ENSMUSP00000141132 ENSMUSP00000099842 ENSMUSP00000156154 ENSMUSP00000056774 ENSMUSP00000051619 ENSMUSP00000071040 ENSMUSP00000029445 ENSMUSP00000029812 ENSMUSP00000029623 ENSMUSP00000096829 ENSMUSP00000099510 ENSMUSP00000058757 ENSMUSP00000035037 ENSMUSP00000061958 ENSMUSP00000025867 ENSMUSP00000107339 ENSMUSP00000033939 ENSMUSP00000026572 ENSMUSP00000055919 ENSMUSP00000004330 …	under	0.854487	0.997991	0.0625
Organismal Systems	Endocrine system	mmu04919	Thyroid hormone signaling pathway	4	579	62	6012	0.006908	0.010313	ENSMUSP00000071486 ENSMUSP00000154338 ENSMUSP00000018645 ENSMUSP00000105736	ENSMUSP00000039657 ENSMUSP00000071486 ENSMUSP00000099922 ENSMUSP00000135935 ENSMUSP00000028499 ENSMUSP00000083077 ENSMUSP00000079991 ENSMUSP00000141132 ENSMUSP00000021142 ENSMUSP00000021614 ENSMUSP00000156154 ENSMUSP00000025912 ENSMUSP00000056774 ENSMUSP00000020522 ENSMUSP00000078741 ENSMUSP00000005606 ENSMUSP00000099657 ENSMUSP00000051619 ENSMUSP00000138788 ENSMUSP00000029445 ENSMUSP00000021028 …	under	0.86089	0.997991	0.0645161
Organismal Systems	Immune system	mmu04670	Leukocyte transendothelial migration	3	579	49	6012	0.005181	0.00815	ENSMUSP00000071486 ENSMUSP00000083587 ENSMUSP00000005611	ENSMUSP00000071486 ENSMUSP00000066068 ENSMUSP00000113071 ENSMUSP00000021554 ENSMUSP00000000299 ENSMUSP00000022369 ENSMUSP00000068468 ENSMUSP00000079991 ENSMUSP00000087457 ENSMUSP00000152813 ENSMUSP00000063734 ENSMUSP00000140404 ENSMUSP00000015484 ENSMUSP00000022622 ENSMUSP00000142326 ENSMUSP00000101913 ENSMUSP00000005889 ENSMUSP00000016094 ENSMUSP00000083587 ENSMUSP00000099718 ENSMUSP00000000001 …	under	0.864041	0.997991	0.0612245
Human Diseases	Infectious disease: bacterial	mmu05100	Bacterial invasion of epithelial cells	3	579	49	6012	0.005181	0.00815	ENSMUSP00000071486 ENSMUSP00000054499 ENSMUSP00000007799	ENSMUSP00000050220 ENSMUSP00000071486 ENSMUSP00000022369 ENSMUSP00000054499 ENSMUSP00000000137 ENSMUSP00000109451 ENSMUSP00000087457 ENSMUSP00000137503 ENSMUSP00000072199 ENSMUSP00000072334 ENSMUSP00000076933 ENSMUSP00000023128 ENSMUSP00000143438 ENSMUSP00000144235 ENSMUSP00000127276 ENSMUSP00000081531 ENSMUSP00000056774 ENSMUSP00000054634 ENSMUSP00000073691 ENSMUSP00000007959 ENSMUSP00000102536 …	under	0.864041	0.997991	0.0612245
Metabolism	Carbohydrate metabolism	mmu00030	Pentose phosphate pathway	1	579	20	6012	0.001727	0.003327	ENSMUSP00000023832	ENSMUSP00000032934 ENSMUSP00000022529 ENSMUSP00000081141 ENSMUSP00000004327 ENSMUSP00000147332 ENSMUSP00000061227 ENSMUSP00000049355 ENSMUSP00000021614 ENSMUSP00000084582 ENSMUSP00000020522 ENSMUSP00000017534 ENSMUSP00000030830 ENSMUSP00000131163 ENSMUSP00000033809 ENSMUSP00000026839 ENSMUSP00000034264 ENSMUSP00000155809 ENSMUSP00000064158 ENSMUSP00000084959 ENSMUSP00000023832	under	0.868493	0.997991	0.05
Metabolism	Xenobiotics biodegradation and metabolism	mmu00980	Metabolism of xenobiotics by cytochrome P450	1	579	20	6012	0.001727	0.003327	ENSMUSP00000041175	ENSMUSP00000118874 ENSMUSP00000056276 ENSMUSP00000047551 ENSMUSP00000026050 ENSMUSP00000058683 ENSMUSP00000011526 ENSMUSP00000049394 ENSMUSP00000005964 ENSMUSP00000031897 ENSMUSP00000031982 ENSMUSP00000047712 ENSMUSP00000026148 ENSMUSP00000073459 ENSMUSP00000112923 ENSMUSP00000129565 ENSMUSP00000041175 ENSMUSP00000001715 ENSMUSP00000028005 ENSMUSP00000004134 ENSMUSP00000029489	under	0.868493	0.997991	0.05
Organismal Systems	Endocrine system	mmu04911	Insulin secretion	1	579	20	6012	0.001727	0.003327	ENSMUSP00000105736	ENSMUSP00000039657 ENSMUSP00000099922 ENSMUSP00000083077 ENSMUSP00000130594 ENSMUSP00000085179 ENSMUSP00000025912 ENSMUSP00000025541 ENSMUSP00000005606 ENSMUSP00000038150 ENSMUSP00000138788 ENSMUSP00000034983 ENSMUSP00000099573 ENSMUSP00000129999 ENSMUSP00000043190 ENSMUSP00000099583 ENSMUSP00000112611 ENSMUSP00000058521 ENSMUSP00000030398 ENSMUSP00000146012 ENSMUSP00000105736	under	0.868493	0.997991	0.05
Organismal Systems	Immune system	mmu04660	T cell receptor signaling pathway	3	579	50	6012	0.005181	0.008317	ENSMUSP00000025263 ENSMUSP00000040307 ENSMUSP00000129001	ENSMUSP00000138350 ENSMUSP00000004377 ENSMUSP00000005889 ENSMUSP00000156154 ENSMUSP00000056774 ENSMUSP00000054634 ENSMUSP00000102106 ENSMUSP00000007959 ENSMUSP00000051619 ENSMUSP00000071040 ENSMUSP00000023467 ENSMUSP00000064280 ENSMUSP00000029445 ENSMUSP00000029812 ENSMUSP00000035037 ENSMUSP00000061958 ENSMUSP00000025867 ENSMUSP00000107339 ENSMUSP00000033939 ENSMUSP00000026572 ENSMUSP00000004330 …	under	0.87304	0.997991	0.06
Human Diseases	Neurodegenerative disease	mmu05012	Parkinson disease	13	579	175	6012	0.022453	0.029108	ENSMUSP00000078429 ENSMUSP00000020312 ENSMUSP00000022419 ENSMUSP00000115419 ENSMUSP00000000175 ENSMUSP00000126067 ENSMUSP00000054856 ENSMUSP00000066303 ENSMUSP00000080998 ENSMUSP00000016396 ENSMUSP00000080993 ENSMUSP00000146960 ENSMUSP00000033582	ENSMUSP00000028222 ENSMUSP00000026495 ENSMUSP00000026459 ENSMUSP00000022062 ENSMUSP00000086626 ENSMUSP00000027111 ENSMUSP00000025083 ENSMUSP00000020673 ENSMUSP00000134023 ENSMUSP00000076777 ENSMUSP00000071054 ENSMUSP00000016463 ENSMUSP00000027432 ENSMUSP00000033176 ENSMUSP00000051033 ENSMUSP00000078429 ENSMUSP00000007212 ENSMUSP00000001566 ENSMUSP00000142326 ENSMUSP00000060246 ENSMUSP00000034049 …	under	0.873809	0.997991	0.0742857
Human Diseases	Cancer: specific types	mmu05221	Acute myeloid leukemia	2	579	36	6012	0.003454	0.005988	ENSMUSP00000056669 ENSMUSP00000025523	ENSMUSP00000068468 ENSMUSP00000020779 ENSMUSP00000156154 ENSMUSP00000056774 ENSMUSP00000056669 ENSMUSP00000102106 ENSMUSP00000025523 ENSMUSP00000051619 ENSMUSP00000102980 ENSMUSP00000102981 ENSMUSP00000029445 ENSMUSP00000029812 ENSMUSP00000099510 ENSMUSP00000029748 ENSMUSP00000035037 ENSMUSP00000025867 ENSMUSP00000001592 ENSMUSP00000107339 ENSMUSP00000033939 ENSMUSP00000026572 ENSMUSP00000004330 …	under	0.874501	0.997991	0.0555556
Environmental Information Processing	Signal transduction	mmu04014	Ras signaling pathway	5	579	77	6012	0.008636	0.012808	ENSMUSP00000025523 ENSMUSP00000121127 ENSMUSP00000070868 ENSMUSP00000087485 ENSMUSP00000113252	ENSMUSP00000079991 ENSMUSP00000037869 ENSMUSP00000019514 ENSMUSP00000101241 ENSMUSP00000106656 ENSMUSP00000100010 ENSMUSP00000112998 ENSMUSP00000156154 ENSMUSP00000102987 ENSMUSP00000056774 ENSMUSP00000054634 ENSMUSP00000102106 ENSMUSP00000005606 ENSMUSP00000025523 ENSMUSP00000007959 ENSMUSP00000051619 ENSMUSP00000066238 ENSMUSP00000023467 ENSMUSP00000138788 ENSMUSP00000088174 ENSMUSP00000020316 …	under	0.876101	0.997991	0.0649351
Environmental Information Processing	Signal transduction	mmu04330	Notch signaling pathway	1	579	21	6012	0.001727	0.003493	ENSMUSP00000146675	ENSMUSP00000078741 ENSMUSP00000099657 ENSMUSP00000099087 ENSMUSP00000078682 ENSMUSP00000080601 ENSMUSP00000119303 ENSMUSP00000130294 ENSMUSP00000003550 ENSMUSP00000019911 ENSMUSP00000048363 ENSMUSP00000023165 ENSMUSP00000136010 ENSMUSP00000028288 ENSMUSP00000021428 ENSMUSP00000066789 ENSMUSP00000040694 ENSMUSP00000058846 ENSMUSP00000130359 ENSMUSP00000107033 ENSMUSP00000146675 ENSMUSP00000136255	under	0.8812	0.997991	0.047619
Organismal Systems	Immune system	mmu04662	B cell receptor signaling pathway	3	579	51	6012	0.005181	0.008483	ENSMUSP00000070073 ENSMUSP00000027966 ENSMUSP00000129001	ENSMUSP00000079991 ENSMUSP00000004377 ENSMUSP00000127941 ENSMUSP00000100075 ENSMUSP00000005889 ENSMUSP00000113852 ENSMUSP00000048057 ENSMUSP00000156154 ENSMUSP00000056774 ENSMUSP00000102106 ENSMUSP00000033617 ENSMUSP00000104255 ENSMUSP00000051619 ENSMUSP00000071040 ENSMUSP00000138788 ENSMUSP00000029445 ENSMUSP00000098058 ENSMUSP00000029812 ENSMUSP00000070073 ENSMUSP00000052777 ENSMUSP00000035037 …	under	0.881508	0.997991	0.0588235
Metabolism	Carbohydrate metabolism	mmu00520	Amino sugar and nucleotide sugar metabolism	2	579	37	6012	0.003454	0.006154	ENSMUSP00000026262 ENSMUSP00000031103	ENSMUSP00000097282 ENSMUSP00000000642 ENSMUSP00000026262 ENSMUSP00000051215 ENSMUSP00000022169 ENSMUSP00000061227 ENSMUSP00000099989 ENSMUSP00000049355 ENSMUSP00000099939 ENSMUSP00000018186 ENSMUSP00000069081 ENSMUSP00000084582 ENSMUSP00000032419 ENSMUSP00000027726 ENSMUSP00000030018 ENSMUSP00000112277 ENSMUSP00000120520 ENSMUSP00000109482 ENSMUSP00000036696 ENSMUSP00000023396 ENSMUSP00000021114 …	under	0.884142	0.997991	0.0540541
Organismal Systems	Endocrine system	mmu04914	Progesterone-mediated oocyte maturation	2	579	37	6012	0.003454	0.006154	ENSMUSP00000020543 ENSMUSP00000031072	ENSMUSP00000024739 ENSMUSP00000091921 ENSMUSP00000142326 ENSMUSP00000033671 ENSMUSP00000119328 ENSMUSP00000000001 ENSMUSP00000156154 ENSMUSP00000130594 ENSMUSP00000056774 ENSMUSP00000005606 ENSMUSP00000099885 ENSMUSP00000051619 ENSMUSP00000031534 ENSMUSP00000099573 ENSMUSP00000035037 ENSMUSP00000061958 ENSMUSP00000107339 ENSMUSP00000101315 ENSMUSP00000005066 ENSMUSP00000001155 ENSMUSP00000122420 …	under	0.884142	0.997991	0.0540541
Genetic Information Processing	Translation	mmu03015	mRNA surveillance pathway	4	579	65	6012	0.006908	0.010812	ENSMUSP00000083474 ENSMUSP00000129789 ENSMUSP00000124450 ENSMUSP00000017384	ENSMUSP00000001809 ENSMUSP00000075089 ENSMUSP00000026667 ENSMUSP00000079070 ENSMUSP00000007708 ENSMUSP00000039109 ENSMUSP00000083474 ENSMUSP00000025218 ENSMUSP00000155308 ENSMUSP00000020608 ENSMUSP00000078940 ENSMUSP00000070682 ENSMUSP00000030014 ENSMUSP00000010241 ENSMUSP00000066806 ENSMUSP00000015100 ENSMUSP00000101858 ENSMUSP00000009774 ENSMUSP00000047797 ENSMUSP00000081142 ENSMUSP00000107109 …	under	0.884432	0.997991	0.0615385
Environmental Information Processing	Signal transduction	mmu04070	Phosphatidylinositol signaling system	3	579	52	6012	0.005181	0.008649	ENSMUSP00000069851 ENSMUSP00000111457 ENSMUSP00000105736	ENSMUSP00000079991 ENSMUSP00000127941 ENSMUSP00000019514 ENSMUSP00000036162 ENSMUSP00000048057 ENSMUSP00000025912 ENSMUSP00000056774 ENSMUSP00000113308 ENSMUSP00000049584 ENSMUSP00000068174 ENSMUSP00000038150 ENSMUSP00000138788 ENSMUSP00000006912 ENSMUSP00000018691 ENSMUSP00000106934 ENSMUSP00000038225 ENSMUSP00000035037 ENSMUSP00000102852 ENSMUSP00000099470 ENSMUSP00000126092 ENSMUSP00000101315 …	under	0.88947	0.997991	0.0576923
Cellular Processes	Cellular community - eukaryotes	mmu04520	Adherens junction	2	579	38	6012	0.003454	0.006321	ENSMUSP00000071486 ENSMUSP00000040307	ENSMUSP00000128278 ENSMUSP00000071486 ENSMUSP00000066068 ENSMUSP00000021554 ENSMUSP00000022369 ENSMUSP00000004377 ENSMUSP00000129592 ENSMUSP00000029053 ENSMUSP00000156154 ENSMUSP00000054634 ENSMUSP00000007959 ENSMUSP00000051619 ENSMUSP00000098058 ENSMUSP00000119153 ENSMUSP00000096829 ENSMUSP00000088837 ENSMUSP00000081263 ENSMUSP00000055919 ENSMUSP00000033505 ENSMUSP00000107323 ENSMUSP00000057707 …	under	0.893095	0.997991	0.0526316
Human Diseases	Cancer: specific types	mmu05224	Breast cancer	2	579	38	6012	0.003454	0.006321	ENSMUSP00000058629 ENSMUSP00000109884	ENSMUSP00000156154 ENSMUSP00000072859 ENSMUSP00000056774 ENSMUSP00000102106 ENSMUSP00000078741 ENSMUSP00000051619 ENSMUSP00000029445 ENSMUSP00000099510 ENSMUSP00000033093 ENSMUSP00000035037 ENSMUSP00000126024 ENSMUSP00000107339 ENSMUSP00000026572 ENSMUSP00000110398 ENSMUSP00000131687 ENSMUSP00000101315 ENSMUSP00000005066 ENSMUSP00000028288 ENSMUSP00000001155 ENSMUSP00000077757 ENSMUSP00000108571 …	under	0.893095	0.997991	0.0526316
Metabolism	Nucleotide metabolism	mmu00230	Purine metabolism	3	579	53	6012	0.005181	0.008816	ENSMUSP00000030583 ENSMUSP00000030154 ENSMUSP00000035179	ENSMUSP00000024866 ENSMUSP00000027384 ENSMUSP00000061227 ENSMUSP00000043926 ENSMUSP00000025696 ENSMUSP00000023684 ENSMUSP00000029405 ENSMUSP00000084582 ENSMUSP00000030583 ENSMUSP00000130594 ENSMUSP00000114273 ENSMUSP00000031160 ENSMUSP00000021282 ENSMUSP00000017841 ENSMUSP00000002397 ENSMUSP00000149655 ENSMUSP00000016105 ENSMUSP00000026723 ENSMUSP00000023043 ENSMUSP00000047665 ENSMUSP00000079888 …	under	0.89695	0.997991	0.0566038
Cellular Processes	Cell growth and death	mmu04114	Oocyte meiosis	3	579	53	6012	0.005181	0.008816	ENSMUSP00000083474 ENSMUSP00000020543 ENSMUSP00000031072	ENSMUSP00000025930 ENSMUSP00000044645 ENSMUSP00000070993 ENSMUSP00000049977 ENSMUSP00000031697 ENSMUSP00000022894 ENSMUSP00000019514 ENSMUSP00000019109 ENSMUSP00000123605 ENSMUSP00000033671 ENSMUSP00000007708 ENSMUSP00000018470 ENSMUSP00000119328 ENSMUSP00000143631 ENSMUSP00000039109 ENSMUSP00000156154 ENSMUSP00000083474 ENSMUSP00000130594 ENSMUSP00000020608 ENSMUSP00000015100 ENSMUSP00000005606 …	under	0.89695	0.997991	0.0566038
Human Diseases	Cancer: overview	mmu05208	Chemical carcinogenesis - reactive oxygen species	10	579	144	6012	0.017271	0.023952	ENSMUSP00000022419 ENSMUSP00000115419 ENSMUSP00000000175 ENSMUSP00000054856 ENSMUSP00000066303 ENSMUSP00000080998 ENSMUSP00000016396 ENSMUSP00000080993 ENSMUSP00000146960 ENSMUSP00000033582	ENSMUSP00000026495 ENSMUSP00000026459 ENSMUSP00000022062 ENSMUSP00000027111 ENSMUSP00000020673 ENSMUSP00000134023 ENSMUSP00000140404 ENSMUSP00000016463 ENSMUSP00000033176 ENSMUSP00000028610 ENSMUSP00000034049 ENSMUSP00000107829 ENSMUSP00000009036 ENSMUSP00000026743 ENSMUSP00000129592 ENSMUSP00000029053 ENSMUSP00000016094 ENSMUSP00000042967 ENSMUSP00000010007 ENSMUSP00000030455 ENSMUSP00000027478 …	under	0.898943	0.997991	0.0694444
Human Diseases	Neurodegenerative disease	mmu05016	Huntington disease	14	579	193	6012	0.02418	0.032102	ENSMUSP00000078429 ENSMUSP00000022419 ENSMUSP00000115419 ENSMUSP00000000175 ENSMUSP00000054856 ENSMUSP00000045201 ENSMUSP00000066303 ENSMUSP00000080998 ENSMUSP00000016396 ENSMUSP00000019882 ENSMUSP00000080993 ENSMUSP00000146960 ENSMUSP00000033582 ENSMUSP00000105736	ENSMUSP00000050220 ENSMUSP00000026495 ENSMUSP00000026459 ENSMUSP00000127842 ENSMUSP00000022062 ENSMUSP00000018875 ENSMUSP00000059033 ENSMUSP00000003038 ENSMUSP00000027111 ENSMUSP00000025083 ENSMUSP00000020673 ENSMUSP00000099411 ENSMUSP00000134023 ENSMUSP00000076777 ENSMUSP00000109552 ENSMUSP00000071054 ENSMUSP00000016463 ENSMUSP00000027432 ENSMUSP00000033176 ENSMUSP00000051033 ENSMUSP00000078429 …	under	0.900558	0.997991	0.0725389
Cellular Processes	Cell motility	mmu04810	Regulation of actin cytoskeleton	7	579	107	6012	0.01209	0.017798	ENSMUSP00000071486 ENSMUSP00000054499 ENSMUSP00000033053 ENSMUSP00000083474 ENSMUSP00000071715 ENSMUSP00000005611 ENSMUSP00000029711	ENSMUSP00000016771 ENSMUSP00000128278 ENSMUSP00000071486 ENSMUSP00000066068 ENSMUSP00000113071 ENSMUSP00000021554 ENSMUSP00000000299 ENSMUSP00000022369 ENSMUSP00000067685 ENSMUSP00000028499 ENSMUSP00000068468 ENSMUSP00000128249 ENSMUSP00000144561 ENSMUSP00000032629 ENSMUSP00000054499 ENSMUSP00000000137 ENSMUSP00000109451 ENSMUSP00000087457 ENSMUSP00000152813 ENSMUSP00000063734 ENSMUSP00000137503 …	under	0.901798	0.997991	0.0654206
Organismal Systems	Endocrine system	mmu04928	Parathyroid hormone synthesis, secretion and action	2	579	40	6012	0.003454	0.006653	ENSMUSP00000087119 ENSMUSP00000105736	ENSMUSP00000096280 ENSMUSP00000142326 ENSMUSP00000020930 ENSMUSP00000000001 ENSMUSP00000156154 ENSMUSP00000130594 ENSMUSP00000085179 ENSMUSP00000025912 ENSMUSP00000021077 ENSMUSP00000025541 ENSMUSP00000005606 ENSMUSP00000007959 ENSMUSP00000049584 ENSMUSP00000051619 ENSMUSP00000038150 ENSMUSP00000138788 ENSMUSP00000099573 ENSMUSP00000136963 ENSMUSP00000000153 ENSMUSP00000043190 ENSMUSP00000104208 …	under	0.909102	0.997991	0.05
Human Diseases	Cancer: specific types	mmu05226	Gastric cancer	2	579	40	6012	0.003454	0.006653	ENSMUSP00000058629 ENSMUSP00000109884	ENSMUSP00000009058 ENSMUSP00000041204 ENSMUSP00000156154 ENSMUSP00000056774 ENSMUSP00000102106 ENSMUSP00000051619 ENSMUSP00000029445 ENSMUSP00000099510 ENSMUSP00000033093 ENSMUSP00000002678 ENSMUSP00000035037 ENSMUSP00000001592 ENSMUSP00000107339 ENSMUSP00000026572 ENSMUSP00000110398 ENSMUSP00000131687 ENSMUSP00000049007 ENSMUSP00000101315 ENSMUSP00000005066 ENSMUSP00000025393 ENSMUSP00000001155 …	under	0.909102	0.997991	0.05
Metabolism	Nucleotide metabolism	mmu00240	Pyrimidine metabolism	1	579	24	6012	0.001727	0.003992	ENSMUSP00000030154	ENSMUSP00000020969 ENSMUSP00000013773 ENSMUSP00000114273 ENSMUSP00000115934 ENSMUSP00000030491 ENSMUSP00000031793 ENSMUSP00000107920 ENSMUSP00000023510 ENSMUSP00000116285 ENSMUSP00000024978 ENSMUSP00000080767 ENSMUSP00000130898 ENSMUSP00000030381 ENSMUSP00000027503 ENSMUSP00000050398 ENSMUSP00000021082 ENSMUSP00000030154 ENSMUSP00000053616 ENSMUSP00000033283 ENSMUSP00000090360 ENSMUSP00000035053 …	under	0.912428	0.997991	0.0416667
Genetic Information Processing	Folding, sorting and degradation	mmu04130	SNARE interactions in vesicular transport	1	579	24	6012	0.001727	0.003992	ENSMUSP00000044877	ENSMUSP00000112138 ENSMUSP00000029476 ENSMUSP00000020174 ENSMUSP00000033075 ENSMUSP00000031378 ENSMUSP00000002818 ENSMUSP00000057462 ENSMUSP00000069529 ENSMUSP00000134854 ENSMUSP00000023449 ENSMUSP00000153629 ENSMUSP00000059501 ENSMUSP00000015725 ENSMUSP00000021329 ENSMUSP00000010536 ENSMUSP00000027743 ENSMUSP00000021285 ENSMUSP00000039543 ENSMUSP00000116376 ENSMUSP00000046243 ENSMUSP00000112611 …	under	0.912428	0.997991	0.0416667
Organismal Systems	Endocrine system	mmu04918	Thyroid hormone synthesis	1	579	25	6012	0.001727	0.004158	ENSMUSP00000105736	ENSMUSP00000039657 ENSMUSP00000099922 ENSMUSP00000028222 ENSMUSP00000020238 ENSMUSP00000076521 ENSMUSP00000020637 ENSMUSP00000083077 ENSMUSP00000033992 ENSMUSP00000130594 ENSMUSP00000085179 ENSMUSP00000025912 ENSMUSP00000025541 ENSMUSP00000005606 ENSMUSP00000049584 ENSMUSP00000038150 ENSMUSP00000138788 ENSMUSP00000034983 ENSMUSP00000099573 ENSMUSP00000031314 ENSMUSP00000099583 ENSMUSP00000081010 …	under	0.920895	0.997991	0.04
Organismal Systems	Excretory system	mmu04961	Endocrine and other factor-regulated calcium reabsorption	1	579	25	6012	0.001727	0.004158	ENSMUSP00000105736	ENSMUSP00000050220 ENSMUSP00000039657 ENSMUSP00000099922 ENSMUSP00000020107 ENSMUSP00000127842 ENSMUSP00000018875 ENSMUSP00000003038 ENSMUSP00000083077 ENSMUSP00000072199 ENSMUSP00000007216 ENSMUSP00000085179 ENSMUSP00000025912 ENSMUSP00000129163 ENSMUSP00000025541 ENSMUSP00000005606 ENSMUSP00000138788 ENSMUSP00000034983 ENSMUSP00000099573 ENSMUSP00000103478 ENSMUSP00000089198 ENSMUSP00000083281 …	under	0.920895	0.997991	0.04
Environmental Information Processing	Signal transduction	mmu04015	Rap1 signaling pathway	4	579	71	6012	0.006908	0.01181	ENSMUSP00000071486 ENSMUSP00000119441 ENSMUSP00000025523 ENSMUSP00000105736	ENSMUSP00000030187 ENSMUSP00000071486 ENSMUSP00000000299 ENSMUSP00000068468 ENSMUSP00000087457 ENSMUSP00000142326 ENSMUSP00000019514 ENSMUSP00000101913 ENSMUSP00000018437 ENSMUSP00000005889 ENSMUSP00000119441 ENSMUSP00000000001 ENSMUSP00000156154 ENSMUSP00000047387 ENSMUSP00000021689 ENSMUSP00000130594 ENSMUSP00000085179 ENSMUSP00000025912 ENSMUSP00000032561 ENSMUSP00000056774 ENSMUSP00000054634 …	under	0.921305	0.997991	0.056338
Environmental Information Processing	Signal transduction	mmu04071	Sphingolipid signaling pathway	4	579	71	6012	0.006908	0.01181	ENSMUSP00000025263 ENSMUSP00000053394 ENSMUSP00000085293 ENSMUSP00000105736	ENSMUSP00000112975 ENSMUSP00000121203 ENSMUSP00000152813 ENSMUSP00000142326 ENSMUSP00000034000 ENSMUSP00000097743 ENSMUSP00000020930 ENSMUSP00000007708 ENSMUSP00000000001 ENSMUSP00000156154 ENSMUSP00000069549 ENSMUSP00000025912 ENSMUSP00000056774 ENSMUSP00000020608 ENSMUSP00000025541 ENSMUSP00000009774 ENSMUSP00000007959 ENSMUSP00000021424 ENSMUSP00000051619 ENSMUSP00000138788 ENSMUSP00000029445 …	under	0.921305	0.997991	0.056338
Cellular Processes	Transport and catabolism	mmu04144	Endocytosis	11	579	163	6012	0.018998	0.027112	ENSMUSP00000022429 ENSMUSP00000091692 ENSMUSP00000058042 ENSMUSP00000034713 ENSMUSP00000047700 ENSMUSP00000097756 ENSMUSP00000007799 ENSMUSP00000048901 ENSMUSP00000130684 ENSMUSP00000004949 ENSMUSP00000131297	ENSMUSP00000050220 ENSMUSP00000061493 ENSMUSP00000015800 ENSMUSP00000127842 ENSMUSP00000018875 ENSMUSP00000003038 ENSMUSP00000035086 ENSMUSP00000025083 ENSMUSP00000000137 ENSMUSP00000109451 ENSMUSP00000137503 ENSMUSP00000023486 ENSMUSP00000030518 ENSMUSP00000022976 ENSMUSP00000102381 ENSMUSP00000034131 ENSMUSP00000072199 ENSMUSP00000109230 ENSMUSP00000028755 ENSMUSP00000039243 ENSMUSP00000104173 …	under	0.925144	0.997991	0.0674847
Human Diseases	Cancer: specific types	mmu05225	Hepatocellular carcinoma	4	579	72	6012	0.006908	0.011976	ENSMUSP00000071486 ENSMUSP00000086094 ENSMUSP00000058629 ENSMUSP00000109884	ENSMUSP00000071486 ENSMUSP00000079991 ENSMUSP00000096547 ENSMUSP00000100868 ENSMUSP00000118874 ENSMUSP00000026050 ENSMUSP00000151629 ENSMUSP00000156154 ENSMUSP00000056774 ENSMUSP00000029214 ENSMUSP00000102106 ENSMUSP00000021052 ENSMUSP00000051619 ENSMUSP00000138788 ENSMUSP00000135784 ENSMUSP00000029445 ENSMUSP00000099510 ENSMUSP00000005548 ENSMUSP00000122354 ENSMUSP00000099422 ENSMUSP00000033093 …	under	0.926307	0.997991	0.0555556
Metabolism	Global and overview maps	mmu01240	Biosynthesis of cofactors	5	579	86	6012	0.008636	0.014305	ENSMUSP00000026613 ENSMUSP00000030583 ENSMUSP00000031103 ENSMUSP00000023832 ENSMUSP00000087405	ENSMUSP00000031411 ENSMUSP00000045841 ENSMUSP00000026613 ENSMUSP00000112870 ENSMUSP00000106481 ENSMUSP00000021443 ENSMUSP00000033098 ENSMUSP00000025696 ENSMUSP00000099939 ENSMUSP00000030455 ENSMUSP00000020969 ENSMUSP00000029147 ENSMUSP00000030583 ENSMUSP00000026470 ENSMUSP00000025542 ENSMUSP00000013773 ENSMUSP00000067767 ENSMUSP00000038540 ENSMUSP00000145412 ENSMUSP00000115934 ENSMUSP00000030491 …	under	0.927219	0.997991	0.0581395
Organismal Systems	Nervous system	mmu04722	Neurotrophin signaling pathway	3	579	58	6012	0.005181	0.009647	ENSMUSP00000074471 ENSMUSP00000042987 ENSMUSP00000004949	ENSMUSP00000079991 ENSMUSP00000070993 ENSMUSP00000107829 ENSMUSP00000019514 ENSMUSP00000033671 ENSMUSP00000119328 ENSMUSP00000156154 ENSMUSP00000101803 ENSMUSP00000056774 ENSMUSP00000054634 ENSMUSP00000102106 ENSMUSP00000007959 ENSMUSP00000051619 ENSMUSP00000066238 ENSMUSP00000088174 ENSMUSP00000029445 ENSMUSP00000098058 ENSMUSP00000107523 ENSMUSP00000029812 ENSMUSP00000017920 ENSMUSP00000058757 …	under	0.927934	0.997991	0.0517241
Metabolism	Carbohydrate metabolism	mmu00020	Citrate cycle (TCA cycle)	1	579	26	6012	0.001727	0.004325	ENSMUSP00000000175	ENSMUSP00000023116 ENSMUSP00000022062 ENSMUSP00000003461 ENSMUSP00000019323 ENSMUSP00000095316 ENSMUSP00000103007 ENSMUSP00000022706 ENSMUSP00000027810 ENSMUSP00000038555 ENSMUSP00000106481 ENSMUSP00000033662 ENSMUSP00000100038 ENSMUSP00000022268 ENSMUSP00000010007 ENSMUSP00000007131 ENSMUSP00000005826 ENSMUSP00000034567 ENSMUSP00000144827 ENSMUSP00000063825 ENSMUSP00000028892 ENSMUSP00000065113 …	under	0.928546	0.997991	0.0384615
Organismal Systems	Endocrine system	mmu04929	GnRH secretion	1	579	26	6012	0.001727	0.004325	ENSMUSP00000105736	ENSMUSP00000156154 ENSMUSP00000025912 ENSMUSP00000056774 ENSMUSP00000025541 ENSMUSP00000049584 ENSMUSP00000051619 ENSMUSP00000038150 ENSMUSP00000138788 ENSMUSP00000029445 ENSMUSP00000136963 ENSMUSP00000043190 ENSMUSP00000104208 ENSMUSP00000035037 ENSMUSP00000107339 ENSMUSP00000026572 ENSMUSP00000101315 ENSMUSP00000005066 ENSMUSP00000108571 ENSMUSP00000099583 ENSMUSP00000103878 ENSMUSP00000084043 …	under	0.928546	0.997991	0.0384615
		mmu01232	Nucleotide metabolism	2	579	44	6012	0.003454	0.007319	ENSMUSP00000030583 ENSMUSP00000035179	ENSMUSP00000024866 ENSMUSP00000043926 ENSMUSP00000025696 ENSMUSP00000020969 ENSMUSP00000029405 ENSMUSP00000030583 ENSMUSP00000114273 ENSMUSP00000030491 ENSMUSP00000031793 ENSMUSP00000017841 ENSMUSP00000002397 ENSMUSP00000149655 ENSMUSP00000016105 ENSMUSP00000026723 ENSMUSP00000107920 ENSMUSP00000023043 ENSMUSP00000047665 ENSMUSP00000079888 ENSMUSP00000116285 ENSMUSP00000024978 ENSMUSP00000006764 …	under	0.934614	0.997991	0.0454545
Cellular Processes	Transport and catabolism	mmu04137	Mitophagy - animal	2	579	44	6012	0.003454	0.007319	ENSMUSP00000015981 ENSMUSP00000139608	ENSMUSP00000109230 ENSMUSP00000020316 ENSMUSP00000029445 ENSMUSP00000099909 ENSMUSP00000065456 ENSMUSP00000096829 ENSMUSP00000108124 ENSMUSP00000057760 ENSMUSP00000020339 ENSMUSP00000151244 ENSMUSP00000019198 ENSMUSP00000025867 ENSMUSP00000107339 ENSMUSP00000009256 ENSMUSP00000076664 ENSMUSP00000026572 ENSMUSP00000055919 ENSMUSP00000099835 ENSMUSP00000119369 ENSMUSP00000015981 ENSMUSP00000048260 …	under	0.934614	0.997991	0.0454545
Metabolism	Xenobiotics biodegradation and metabolism	mmu00983	Drug metabolism - other enzymes	1	579	27	6012	0.001727	0.004491	ENSMUSP00000026613	ENSMUSP00000024866 ENSMUSP00000026613 ENSMUSP00000020779 ENSMUSP00000118874 ENSMUSP00000029405 ENSMUSP00000026050 ENSMUSP00000030491 ENSMUSP00000058683 ENSMUSP00000026723 ENSMUSP00000023510 ENSMUSP00000079888 ENSMUSP00000024978 ENSMUSP00000080767 ENSMUSP00000112923 ENSMUSP00000129565 ENSMUSP00000050398 ENSMUSP00000001715 ENSMUSP00000053616 ENSMUSP00000028005 ENSMUSP00000004134 ENSMUSP00000091181 …	under	0.935457	0.997991	0.037037
		mmu01250	Biosynthesis of nucleotide sugars	1	579	27	6012	0.001727	0.004491	ENSMUSP00000031103	ENSMUSP00000097282 ENSMUSP00000000642 ENSMUSP00000051215 ENSMUSP00000061227 ENSMUSP00000099989 ENSMUSP00000049355 ENSMUSP00000099939 ENSMUSP00000084582 ENSMUSP00000032419 ENSMUSP00000030018 ENSMUSP00000109482 ENSMUSP00000036696 ENSMUSP00000023396 ENSMUSP00000021114 ENSMUSP00000107914 ENSMUSP00000032057 ENSMUSP00000070871 ENSMUSP00000155711 ENSMUSP00000031103 ENSMUSP00000092186 ENSMUSP00000081745 …	under	0.935457	0.997991	0.037037
Genetic Information Processing	Replication and repair	mmu03420	Nucleotide excision repair	1	579	29	6012	0.001727	0.004824	ENSMUSP00000138108	ENSMUSP00000025649 ENSMUSP00000110771 ENSMUSP00000028817 ENSMUSP00000016680 ENSMUSP00000023867 ENSMUSP00000000767 ENSMUSP00000030134 ENSMUSP00000105383 ENSMUSP00000054380 ENSMUSP00000039776 ENSMUSP00000001565 ENSMUSP00000030091 ENSMUSP00000110995 ENSMUSP00000083652 ENSMUSP00000131136 ENSMUSP00000025241 ENSMUSP00000031333 ENSMUSP00000021523 ENSMUSP00000110198 ENSMUSP00000039621 ENSMUSP00000099621 …	under	0.947342	0.997991	0.0344828
Organismal Systems	Immune system	mmu04658	Th1 and Th2 cell differentiation	1	579	29	6012	0.001727	0.004824	ENSMUSP00000129001	ENSMUSP00000141132 ENSMUSP00000099842 ENSMUSP00000156154 ENSMUSP00000078741 ENSMUSP00000051619 ENSMUSP00000071040 ENSMUSP00000102980 ENSMUSP00000102981 ENSMUSP00000029812 ENSMUSP00000089708 ENSMUSP00000061958 ENSMUSP00000025867 ENSMUSP00000033939 ENSMUSP00000004330 ENSMUSP00000125722 ENSMUSP00000041008 ENSMUSP00000028288 ENSMUSP00000099944 ENSMUSP00000150354 ENSMUSP00000046105 ENSMUSP00000040694 …	under	0.947342	0.997991	0.0344828
Organismal Systems	Endocrine system	mmu04917	Prolactin signaling pathway	1	579	29	6012	0.001727	0.004824	ENSMUSP00000104548	ENSMUSP00000141132 ENSMUSP00000156154 ENSMUSP00000056774 ENSMUSP00000102106 ENSMUSP00000051619 ENSMUSP00000102980 ENSMUSP00000102981 ENSMUSP00000029445 ENSMUSP00000029812 ENSMUSP00000035037 ENSMUSP00000061958 ENSMUSP00000025867 ENSMUSP00000107339 ENSMUSP00000026572 ENSMUSP00000110398 ENSMUSP00000101315 ENSMUSP00000120152 ENSMUSP00000005066 ENSMUSP00000105155 ENSMUSP00000081745 ENSMUSP00000108571 …	under	0.947342	0.997991	0.0344828
Organismal Systems	Endocrine system	mmu04935	Growth hormone synthesis, secretion and action	2	579	50	6012	0.003454	0.008317	ENSMUSP00000064680 ENSMUSP00000105736	ENSMUSP00000079991 ENSMUSP00000142326 ENSMUSP00000141132 ENSMUSP00000000001 ENSMUSP00000156154 ENSMUSP00000130594 ENSMUSP00000085179 ENSMUSP00000025912 ENSMUSP00000056774 ENSMUSP00000102106 ENSMUSP00000025541 ENSMUSP00000005606 ENSMUSP00000049584 ENSMUSP00000051619 ENSMUSP00000038150 ENSMUSP00000102980 ENSMUSP00000138788 ENSMUSP00000102981 ENSMUSP00000029445 ENSMUSP00000017920 ENSMUSP00000099573 …	under	0.960539	0.997991	0.04
Environmental Information Processing	Signal transduction	mmu04068	FoxO signaling pathway	2	579	51	6012	0.003454	0.008483	ENSMUSP00000094225 ENSMUSP00000130078	ENSMUSP00000028610 ENSMUSP00000038555 ENSMUSP00000124382 ENSMUSP00000156154 ENSMUSP00000056774 ENSMUSP00000102106 ENSMUSP00000103474 ENSMUSP00000007012 ENSMUSP00000051619 ENSMUSP00000029445 ENSMUSP00000018353 ENSMUSP00000002678 ENSMUSP00000035037 ENSMUSP00000061958 ENSMUSP00000088837 ENSMUSP00000107339 ENSMUSP00000033939 ENSMUSP00000026572 ENSMUSP00000101315 ENSMUSP00000132499 ENSMUSP00000023165 …	under	0.963765	0.997991	0.0392157
Cellular Processes	Transport and catabolism	mmu04146	Peroxisome	2	579	52	6012	0.003454	0.008649	ENSMUSP00000018610 ENSMUSP00000019945	ENSMUSP00000095316 ENSMUSP00000024866 ENSMUSP00000042351 ENSMUSP00000103007 ENSMUSP00000028610 ENSMUSP00000114159 ENSMUSP00000034046 ENSMUSP00000030454 ENSMUSP00000108528 ENSMUSP00000025385 ENSMUSP00000046585 ENSMUSP00000030432 ENSMUSP00000041967 ENSMUSP00000030340 ENSMUSP00000025904 ENSMUSP00000063412 ENSMUSP00000007012 ENSMUSP00000023707 ENSMUSP00000099919 ENSMUSP00000066092 ENSMUSP00000063325 …	under	0.966736	0.997991	0.0384615
Metabolism	Glycan biosynthesis and metabolism	mmu00510	N-Glycan biosynthesis	1	579	34	6012	0.001727	0.005655	ENSMUSP00000033643	ENSMUSP00000032143 ENSMUSP00000093965 ENSMUSP00000083928 ENSMUSP00000113116 ENSMUSP00000112081 ENSMUSP00000030538 ENSMUSP00000035879 ENSMUSP00000032114 ENSMUSP00000036996 ENSMUSP00000035010 ENSMUSP00000151568 ENSMUSP00000043580 ENSMUSP00000080484 ENSMUSP00000057905 ENSMUSP00000095949 ENSMUSP00000022781 ENSMUSP00000050979 ENSMUSP00000103086 ENSMUSP00000097770 ENSMUSP00000038359 ENSMUSP00000136327 …	under	0.96835	0.997991	0.0294118
Human Diseases	Cancer: specific types	mmu05223	Non-small cell lung cancer	1	579	34	6012	0.001727	0.005655	ENSMUSP00000113252	ENSMUSP00000079991 ENSMUSP00000025083 ENSMUSP00000156154 ENSMUSP00000056774 ENSMUSP00000102106 ENSMUSP00000051619 ENSMUSP00000102980 ENSMUSP00000138788 ENSMUSP00000102981 ENSMUSP00000029445 ENSMUSP00000018353 ENSMUSP00000033093 ENSMUSP00000035037 ENSMUSP00000126024 ENSMUSP00000107339 ENSMUSP00000026572 ENSMUSP00000101315 ENSMUSP00000120152 ENSMUSP00000005066 ENSMUSP00000094528 ENSMUSP00000001155 …	under	0.96835	0.997991	0.0294118
Cellular Processes	Cellular community - eukaryotes	mmu04530	Tight junction	3	579	69	6012	0.005181	0.011477	ENSMUSP00000071486 ENSMUSP00000078429 ENSMUSP00000029717	ENSMUSP00000016771 ENSMUSP00000071486 ENSMUSP00000066068 ENSMUSP00000113071 ENSMUSP00000021554 ENSMUSP00000020630 ENSMUSP00000128249 ENSMUSP00000000137 ENSMUSP00000109451 ENSMUSP00000087457 ENSMUSP00000076777 ENSMUSP00000152813 ENSMUSP00000063734 ENSMUSP00000137503 ENSMUSP00000051033 ENSMUSP00000078429 ENSMUSP00000076933 ENSMUSP00000007708 ENSMUSP00000151915 ENSMUSP00000041857 ENSMUSP00000143438 …	under	0.968369	0.997991	0.0434783
Human Diseases	Drug resistance: antineoplastic	mmu01521	EGFR tyrosine kinase inhibitor resistance	1	579	35	6012	0.001727	0.005822	ENSMUSP00000053403	ENSMUSP00000079991 ENSMUSP00000099842 ENSMUSP00000156154 ENSMUSP00000056774 ENSMUSP00000102106 ENSMUSP00000051619 ENSMUSP00000138788 ENSMUSP00000029445 ENSMUSP00000099510 ENSMUSP00000099878 ENSMUSP00000033093 ENSMUSP00000035037 ENSMUSP00000107339 ENSMUSP00000026572 ENSMUSP00000110398 ENSMUSP00000101315 ENSMUSP00000029803 ENSMUSP00000120152 ENSMUSP00000005066 ENSMUSP00000071289 ENSMUSP00000105155 …	under	0.971416	0.997991	0.0285714
Genetic Information Processing	Transcription	mmu03040	Spliceosome	6	579	115	6012	0.010363	0.019128	ENSMUSP00000061474 ENSMUSP00000090059 ENSMUSP00000030622 ENSMUSP00000086987 ENSMUSP00000112213 ENSMUSP00000019803	ENSMUSP00000015800 ENSMUSP00000018449 ENSMUSP00000099509 ENSMUSP00000021062 ENSMUSP00000021306 ENSMUSP00000045073 ENSMUSP00000031061 ENSMUSP00000153328 ENSMUSP00000047571 ENSMUSP00000027127 ENSMUSP00000107595 ENSMUSP00000121340 ENSMUSP00000135647 ENSMUSP00000026667 ENSMUSP00000107237 ENSMUSP00000054863 ENSMUSP00000048470 ENSMUSP00000075655 ENSMUSP00000103553 ENSMUSP00000003450 ENSMUSP00000025774 …	under	0.971443	0.997991	0.0521739
Human Diseases	Drug resistance: antineoplastic	mmu01522	Endocrine resistance	1	579	36	6012	0.001727	0.005988	ENSMUSP00000018645	ENSMUSP00000156154 ENSMUSP00000130594 ENSMUSP00000085179 ENSMUSP00000056774 ENSMUSP00000102106 ENSMUSP00000078741 ENSMUSP00000005606 ENSMUSP00000051619 ENSMUSP00000029445 ENSMUSP00000099573 ENSMUSP00000099510 ENSMUSP00000033093 ENSMUSP00000035037 ENSMUSP00000061958 ENSMUSP00000107339 ENSMUSP00000026572 ENSMUSP00000101315 ENSMUSP00000005066 ENSMUSP00000105155 ENSMUSP00000028288 ENSMUSP00000001155 …	under	0.974185	0.997991	0.0277778
Environmental Information Processing	Signal transduction	mmu04066	HIF-1 signaling pathway	2	579	56	6012	0.003454	0.009315	ENSMUSP00000018610 ENSMUSP00000053403	ENSMUSP00000075513 ENSMUSP00000097282 ENSMUSP00000000642 ENSMUSP00000032934 ENSMUSP00000080302 ENSMUSP00000113942 ENSMUSP00000079991 ENSMUSP00000051215 ENSMUSP00000023486 ENSMUSP00000015484 ENSMUSP00000148107 ENSMUSP00000033662 ENSMUSP00000022268 ENSMUSP00000021614 ENSMUSP00000156154 ENSMUSP00000056774 ENSMUSP00000020522 ENSMUSP00000108264 ENSMUSP00000017534 ENSMUSP00000051619 ENSMUSP00000138788 …	under	0.976443	0.997991	0.0357143
Human Diseases	Cancer: specific types	mmu05215	Prostate cancer	1	579	39	6012	0.001727	0.006487	ENSMUSP00000029711	ENSMUSP00000024739 ENSMUSP00000020238 ENSMUSP00000091921 ENSMUSP00000156154 ENSMUSP00000056774 ENSMUSP00000102106 ENSMUSP00000051619 ENSMUSP00000029445 ENSMUSP00000029812 ENSMUSP00000099510 ENSMUSP00000035037 ENSMUSP00000025867 ENSMUSP00000107339 ENSMUSP00000033939 ENSMUSP00000026572 ENSMUSP00000004330 ENSMUSP00000110398 ENSMUSP00000101315 ENSMUSP00000023165 ENSMUSP00000005066 ENSMUSP00000001155 …	under	0.980986	0.997991	0.025641
Genetic Information Processing	Translation	mmu00970	Aminoacyl-tRNA biosynthesis	1	579	40	6012	0.001727	0.006653	ENSMUSP00000102393	ENSMUSP00000045841 ENSMUSP00000084572 ENSMUSP00000027921 ENSMUSP00000132082 ENSMUSP00000034441 ENSMUSP00000101669 ENSMUSP00000018992 ENSMUSP00000027602 ENSMUSP00000095197 ENSMUSP00000006838 ENSMUSP00000003572 ENSMUSP00000010899 ENSMUSP00000090808 ENSMUSP00000124625 ENSMUSP00000036710 ENSMUSP00000001416 ENSMUSP00000099685 ENSMUSP00000129828 ENSMUSP00000022849 ENSMUSP00000130666 ENSMUSP00000117231 …	under	0.982829	0.997991	0.025
Genetic Information Processing	Folding, sorting and degradation	mmu03050	Proteasome	1	579	41	6012	0.001727	0.00682	ENSMUSP00000019470	ENSMUSP00000071054 ENSMUSP00000027432 ENSMUSP00000007212 ENSMUSP00000021049 ENSMUSP00000021063 ENSMUSP00000017365 ENSMUSP00000021412 ENSMUSP00000134735 ENSMUSP00000034848 ENSMUSP00000029082 ENSMUSP00000133571 ENSMUSP00000033008 ENSMUSP00000022380 ENSMUSP00000022256 ENSMUSP00000021595 ENSMUSP00000025196 ENSMUSP00000125548 ENSMUSP00000026560 ENSMUSP00000030642 ENSMUSP00000014913 ENSMUSP00000088057 …	under	0.984494	0.997991	0.0243902
Environmental Information Processing	Signal transduction	mmu04024	cAMP signaling pathway	2	579	62	6012	0.003454	0.010313	ENSMUSP00000083474 ENSMUSP00000129001	ENSMUSP00000039657 ENSMUSP00000099922 ENSMUSP00000020107 ENSMUSP00000135935 ENSMUSP00000083077 ENSMUSP00000152813 ENSMUSP00000142326 ENSMUSP00000019514 ENSMUSP00000005889 ENSMUSP00000021142 ENSMUSP00000039109 ENSMUSP00000000001 ENSMUSP00000156154 ENSMUSP00000069549 ENSMUSP00000083474 ENSMUSP00000130594 ENSMUSP00000085179 ENSMUSP00000063412 ENSMUSP00000056774 ENSMUSP00000015100 ENSMUSP00000005606 …	under	0.986065	0.997991	0.0322581
Genetic Information Processing	Folding, sorting and degradation	mmu04141	Protein processing in endoplasmic reticulum	5	579	116	6012	0.008636	0.019295	ENSMUSP00000140443 ENSMUSP00000020653 ENSMUSP00000143606 ENSMUSP00000029414 ENSMUSP00000008748	ENSMUSP00000016072 ENSMUSP00000028222 ENSMUSP00000024739 ENSMUSP00000030164 ENSMUSP00000015800 ENSMUSP00000020238 ENSMUSP00000091921 ENSMUSP00000037930 ENSMUSP00000028683 ENSMUSP00000026122 ENSMUSP00000076521 ENSMUSP00000032143 ENSMUSP00000020637 ENSMUSP00000003912 ENSMUSP00000068594 ENSMUSP00000093965 ENSMUSP00000050336 ENSMUSP00000002091 ENSMUSP00000025891 ENSMUSP00000031697 ENSMUSP00000004574 …	under	0.990085	0.997991	0.0431034
Genetic Information Processing	Translation	mmu03008	Ribosome biogenesis in eukaryotes	1	579	52	6012	0.001727	0.008649	ENSMUSP00000052465	ENSMUSP00000099933 ENSMUSP00000140250 ENSMUSP00000099487 ENSMUSP00000037613 ENSMUSP00000028608 ENSMUSP00000028921 ENSMUSP00000010241 ENSMUSP00000054084 ENSMUSP00000034981 ENSMUSP00000031383 ENSMUSP00000096829 ENSMUSP00000033776 ENSMUSP00000135639 ENSMUSP00000026387 ENSMUSP00000055919 ENSMUSP00000034524 ENSMUSP00000091840 ENSMUSP00000047119 ENSMUSP00000048204 ENSMUSP00000068103 ENSMUSP00000071569 …	under	0.994956	0.997991	0.0192308
Genetic Information Processing	Folding, sorting and degradation	mmu03018	RNA degradation	1	579	54	6012	0.001727	0.008982	ENSMUSP00000035179	ENSMUSP00000025217 ENSMUSP00000075513 ENSMUSP00000027123 ENSMUSP00000001809 ENSMUSP00000096073 ENSMUSP00000149620 ENSMUSP00000079070 ENSMUSP00000022281 ENSMUSP00000021614 ENSMUSP00000020756 ENSMUSP00000028921 ENSMUSP00000020522 ENSMUSP00000034981 ENSMUSP00000039134 ENSMUSP00000072620 ENSMUSP00000041906 ENSMUSP00000036265 ENSMUSP00000034539 ENSMUSP00000004378 ENSMUSP00000153521 ENSMUSP00000026891 …	under	0.995888	0.997991	0.0185185
Human Diseases	Cancer: overview	mmu05207	Chemical carcinogenesis - receptor activation	1	579	61	6012	0.001727	0.010146	ENSMUSP00000031741	ENSMUSP00000024739 ENSMUSP00000020238 ENSMUSP00000091921 ENSMUSP00000142326 ENSMUSP00000001479 ENSMUSP00000033671 ENSMUSP00000119328 ENSMUSP00000118874 ENSMUSP00000047551 ENSMUSP00000026050 ENSMUSP00000000001 ENSMUSP00000156154 ENSMUSP00000130594 ENSMUSP00000085179 ENSMUSP00000056774 ENSMUSP00000102106 ENSMUSP00000078741 ENSMUSP00000005606 ENSMUSP00000051619 ENSMUSP00000102980 ENSMUSP00000138788 …	under	0.997991	0.997991	0.0163934

## Sheet: C_VS_A_Enrichment
Level1	Level2	Map_ID	Map_Name	Test	TestAll	Ref	RefAll	Test_per	Ref_per	Test_Seq	Ref_Seq	Over_Under	P value	FDR	richFactor
Human Diseases	Infectious disease: bacterial	mmu05150	Staphylococcus aureus infection	17	578	37	6012	0.029412	0.006154	ENSMUSP00000007272 ENSMUSP00000079699 ENSMUSP00000099420 ENSMUSP00000083587 ENSMUSP00000007280 ENSMUSP00000017270 ENSMUSP00000007318 ENSMUSP00000007317 ENSMUSP00000041008 ENSMUSP00000099416 ENSMUSP00000046105 ENSMUSP00000141648 ENSMUSP00000014578 ENSMUSP00000070925 ENSMUSP00000017741 ENSMUSP00000065799 ENSMUSP00000028233	ENSMUSP00000000299 ENSMUSP00000068468 ENSMUSP00000007272 ENSMUSP00000079699 ENSMUSP00000024988 ENSMUSP00000101913 ENSMUSP00000099420 ENSMUSP00000083587 ENSMUSP00000007280 ENSMUSP00000017270 ENSMUSP00000007275 ENSMUSP00000029748 ENSMUSP00000007318 ENSMUSP00000007317 ENSMUSP00000018399 ENSMUSP00000079882 ENSMUSP00000027966 ENSMUSP00000041008 ENSMUSP00000131938 ENSMUSP00000103039 ENSMUSP00000099416 …	over	1.0357e-08	3.07602e-06	0.459459
Environmental Information Processing	Signaling molecules and interaction	mmu04061	Viral protein interaction with cytokine and cytokine receptor	8	578	11	6012	0.013841	0.00183	ENSMUSP00000025523 ENSMUSP00000025263 ENSMUSP00000031327 ENSMUSP00000039600 ENSMUSP00000021970 ENSMUSP00000074885 ENSMUSP00000019266 ENSMUSP00000001008	ENSMUSP00000025523 ENSMUSP00000025263 ENSMUSP00000031327 ENSMUSP00000030336 ENSMUSP00000039600 ENSMUSP00000151575 ENSMUSP00000021970 ENSMUSP00000074885 ENSMUSP00000019266 ENSMUSP00000026911 ENSMUSP00000001008	over	8.84919e-07	0.000131411	0.727273
Organismal Systems	Immune system	mmu04640	Hematopoietic cell lineage	11	578	22	6012	0.019031	0.003659	ENSMUSP00000056669 ENSMUSP00000080974 ENSMUSP00000025523 ENSMUSP00000021028 ENSMUSP00000032492 ENSMUSP00000041008 ENSMUSP00000025263 ENSMUSP00000028881 ENSMUSP00000046105 ENSMUSP00000028882 ENSMUSP00000126422	ENSMUSP00000103015 ENSMUSP00000068468 ENSMUSP00000023486 ENSMUSP00000023128 ENSMUSP00000099718 ENSMUSP00000056669 ENSMUSP00000080974 ENSMUSP00000025523 ENSMUSP00000005218 ENSMUSP00000021028 ENSMUSP00000029748 ENSMUSP00000032492 ENSMUSP00000074902 ENSMUSP00000019248 ENSMUSP00000041008 ENSMUSP00000025263 ENSMUSP00000028881 ENSMUSP00000046105 ENSMUSP00000028882 ENSMUSP00000033063 ENSMUSP00000029717 …	over	1.5534e-06	0.000153786	0.5
Environmental Information Processing	Signaling molecules and interaction	mmu04060	Cytokine-cytokine receptor interaction	12	578	27	6012	0.020761	0.004491	ENSMUSP00000025523 ENSMUSP00000025263 ENSMUSP00000028881 ENSMUSP00000031327 ENSMUSP00000023693 ENSMUSP00000019064 ENSMUSP00000039600 ENSMUSP00000028882 ENSMUSP00000021970 ENSMUSP00000074885 ENSMUSP00000019266 ENSMUSP00000001008	ENSMUSP00000025523 ENSMUSP00000017799 ENSMUSP00000002678 ENSMUSP00000025263 ENSMUSP00000028881 ENSMUSP00000007757 ENSMUSP00000031327 ENSMUSP00000036326 ENSMUSP00000030336 ENSMUSP00000154836 ENSMUSP00000023693 ENSMUSP00000019064 ENSMUSP00000039600 ENSMUSP00000028882 ENSMUSP00000151575 ENSMUSP00000021970 ENSMUSP00000093843 ENSMUSP00000001792 ENSMUSP00000032211 ENSMUSP00000020188 ENSMUSP00000074885 …	over	2.50238e-06	0.000185802	0.444444
Human Diseases	Immune disease	mmu05323	Rheumatoid arthritis	13	578	36	6012	0.022491	0.005988	ENSMUSP00000083587 ENSMUSP00000029623 ENSMUSP00000024932 ENSMUSP00000041008 ENSMUSP00000025263 ENSMUSP00000028881 ENSMUSP00000046105 ENSMUSP00000031327 ENSMUSP00000039600 ENSMUSP00000028882 ENSMUSP00000087047 ENSMUSP00000074885 ENSMUSP00000001008	ENSMUSP00000000299 ENSMUSP00000110314 ENSMUSP00000006435 ENSMUSP00000122474 ENSMUSP00000099399 ENSMUSP00000040756 ENSMUSP00000101913 ENSMUSP00000022904 ENSMUSP00000083587 ENSMUSP00000019354 ENSMUSP00000013304 ENSMUSP00000152169 ENSMUSP00000029900 ENSMUSP00000029623 ENSMUSP00000002678 ENSMUSP00000021536 ENSMUSP00000039737 ENSMUSP00000024932 ENSMUSP00000027165 ENSMUSP00000019231 ENSMUSP00000041008 …	over	1.50673e-05	0.000894998	0.361111
Human Diseases	Infectious disease: parasitic	mmu05140	Leishmaniasis	14	578	42	6012	0.024221	0.006986	ENSMUSP00000042457 ENSMUSP00000004377 ENSMUSP00000141132 ENSMUSP00000035065 ENSMUSP00000029623 ENSMUSP00000061958 ENSMUSP00000055637 ENSMUSP00000041008 ENSMUSP00000025263 ENSMUSP00000018610 ENSMUSP00000028881 ENSMUSP00000046105 ENSMUSP00000028882 ENSMUSP00000040307	ENSMUSP00000000299 ENSMUSP00000068468 ENSMUSP00000042457 ENSMUSP00000087457 ENSMUSP00000004377 ENSMUSP00000140404 ENSMUSP00000015484 ENSMUSP00000024988 ENSMUSP00000141132 ENSMUSP00000099842 ENSMUSP00000016094 ENSMUSP00000054556 ENSMUSP00000099718 ENSMUSP00000156154 ENSMUSP00000094084 ENSMUSP00000051619 ENSMUSP00000138788 ENSMUSP00000035065 ENSMUSP00000029812 ENSMUSP00000029623 ENSMUSP00000029748 …	over	2.03982e-05	0.00100971	0.333333
Human Diseases	Infectious disease: parasitic	mmu05145	Toxoplasmosis	15	578	53	6012	0.025952	0.008816	ENSMUSP00000141132 ENSMUSP00000050446 ENSMUSP00000029623 ENSMUSP00000061958 ENSMUSP00000041008 ENSMUSP00000025263 ENSMUSP00000047356 ENSMUSP00000018610 ENSMUSP00000146805 ENSMUSP00000150354 ENSMUSP00000046105 ENSMUSP00000007803 ENSMUSP00000034713 ENSMUSP00000040307 ENSMUSP00000030747	ENSMUSP00000015800 ENSMUSP00000087457 ENSMUSP00000142326 ENSMUSP00000141132 ENSMUSP00000099842 ENSMUSP00000000001 ENSMUSP00000156154 ENSMUSP00000079306 ENSMUSP00000050446 ENSMUSP00000051619 ENSMUSP00000029812 ENSMUSP00000029623 ENSMUSP00000140546 ENSMUSP00000133815 ENSMUSP00000017799 ENSMUSP00000002678 ENSMUSP00000061958 ENSMUSP00000025867 ENSMUSP00000033939 ENSMUSP00000123539 ENSMUSP00000004330 …	over	9.02236e-05	0.00382806	0.283019
Human Diseases	Infectious disease: parasitic	mmu05144	Malaria	8	578	19	6012	0.013841	0.00316	ENSMUSP00000083587 ENSMUSP00000080974 ENSMUSP00000029623 ENSMUSP00000090897 ENSMUSP00000025263 ENSMUSP00000095794 ENSMUSP00000028881 ENSMUSP00000044903	ENSMUSP00000044004 ENSMUSP00000000299 ENSMUSP00000101913 ENSMUSP00000083587 ENSMUSP00000080974 ENSMUSP00000029623 ENSMUSP00000029574 ENSMUSP00000017799 ENSMUSP00000002678 ENSMUSP00000082207 ENSMUSP00000074902 ENSMUSP00000090897 ENSMUSP00000025263 ENSMUSP00000095794 ENSMUSP00000028881 ENSMUSP00000035092 ENSMUSP00000044903 ENSMUSP00000043768 ENSMUSP00000022213	over	0.000201251	0.00747143	0.421053
Human Diseases	Infectious disease: viral	mmu05164	Influenza A	20	578	90	6012	0.034602	0.01497	ENSMUSP00000071486 ENSMUSP00000141132 ENSMUSP00000083587 ENSMUSP00000028259 ENSMUSP00000042433 ENSMUSP00000027015 ENSMUSP00000126024 ENSMUSP00000020970 ENSMUSP00000041008 ENSMUSP00000025263 ENSMUSP00000028881 ENSMUSP00000150354 ENSMUSP00000046105 ENSMUSP00000023693 ENSMUSP00000039600 ENSMUSP00000014578 ENSMUSP00000028882 ENSMUSP00000031931 ENSMUSP00000030747 ENSMUSP00000125731	ENSMUSP00000071486 ENSMUSP00000020673 ENSMUSP00000016463 ENSMUSP00000034049 ENSMUSP00000099933 ENSMUSP00000148115 ENSMUSP00000141132 ENSMUSP00000071214 ENSMUSP00000099842 ENSMUSP00000107787 ENSMUSP00000083587 ENSMUSP00000028259 ENSMUSP00000156154 ENSMUSP00000022734 ENSMUSP00000110021 ENSMUSP00000056774 ENSMUSP00000129163 ENSMUSP00000079198 ENSMUSP00000010241 ENSMUSP00000125291 ENSMUSP00000042433 …	over	0.000265146	0.00809661	0.222222
Environmental Information Processing	Signal transduction	mmu04668	TNF signaling pathway	15	578	58	6012	0.025952	0.009647	ENSMUSP00000083587 ENSMUSP00000104825 ENSMUSP00000035065 ENSMUSP00000061958 ENSMUSP00000087119 ENSMUSP00000025263 ENSMUSP00000019997 ENSMUSP00000064680 ENSMUSP00000028881 ENSMUSP00000031327 ENSMUSP00000039600 ENSMUSP00000040307 ENSMUSP00000069850 ENSMUSP00000104548 ENSMUSP00000074885	ENSMUSP00000155155 ENSMUSP00000083587 ENSMUSP00000104825 ENSMUSP00000156154 ENSMUSP00000056774 ENSMUSP00000051619 ENSMUSP00000035065 ENSMUSP00000029812 ENSMUSP00000029574 ENSMUSP00000108124 ENSMUSP00000057760 ENSMUSP00000140546 ENSMUSP00000035037 ENSMUSP00000061958 ENSMUSP00000025867 ENSMUSP00000087119 ENSMUSP00000033939 ENSMUSP00000021844 ENSMUSP00000004330 ENSMUSP00000055521 ENSMUSP00000025263 …	over	0.000272613	0.00809661	0.258621
Human Diseases	Immune disease	mmu05321	Inflammatory bowel disease	7	578	16	6012	0.012111	0.002661	ENSMUSP00000141132 ENSMUSP00000029623 ENSMUSP00000041008 ENSMUSP00000025263 ENSMUSP00000028881 ENSMUSP00000046105 ENSMUSP00000028882	ENSMUSP00000141132 ENSMUSP00000029812 ENSMUSP00000029623 ENSMUSP00000002678 ENSMUSP00000089708 ENSMUSP00000025867 ENSMUSP00000041008 ENSMUSP00000025263 ENSMUSP00000120152 ENSMUSP00000028881 ENSMUSP00000046105 ENSMUSP00000028882 ENSMUSP00000067704 ENSMUSP00000020188 ENSMUSP00000130115 ENSMUSP00000129001	over	0.000386231	0.0104282	0.4375
Human Diseases	Cardiovascular disease	mmu05416	Viral myocarditis	10	578	31	6012	0.017301	0.005156	ENSMUSP00000071486 ENSMUSP00000083587 ENSMUSP00000041008 ENSMUSP00000046105 ENSMUSP00000087047 ENSMUSP00000007799 ENSMUSP00000142109 ENSMUSP00000030747 ENSMUSP00000080538 ENSMUSP00000125731	ENSMUSP00000071486 ENSMUSP00000000299 ENSMUSP00000047678 ENSMUSP00000101913 ENSMUSP00000124551 ENSMUSP00000083587 ENSMUSP00000134004 ENSMUSP00000145147 ENSMUSP00000098058 ENSMUSP00000140546 ENSMUSP00000017799 ENSMUSP00000057707 ENSMUSP00000027165 ENSMUSP00000080159 ENSMUSP00000099739 ENSMUSP00000041008 ENSMUSP00000036384 ENSMUSP00000072942 ENSMUSP00000134582 ENSMUSP00000147767 ENSMUSP00000046105 …	over	0.000427435	0.010579	0.322581
Human Diseases	Infectious disease: viral	mmu05168	Herpes simplex virus 1 infection	24	578	122	6012	0.041522	0.020293	ENSMUSP00000141132 ENSMUSP00000028259 ENSMUSP00000128401 ENSMUSP00000042433 ENSMUSP00000021028 ENSMUSP00000029623 ENSMUSP00000095171 ENSMUSP00000061474 ENSMUSP00000041008 ENSMUSP00000025263 ENSMUSP00000028881 ENSMUSP00000150354 ENSMUSP00000099534 ENSMUSP00000046105 ENSMUSP00000007803 ENSMUSP00000023693 ENSMUSP00000039600 ENSMUSP00000074898 ENSMUSP00000040307 ENSMUSP00000154338 ENSMUSP00000028233 …	ENSMUSP00000028683 ENSMUSP00000003912 ENSMUSP00000023128 ENSMUSP00000024988 ENSMUSP00000141132 ENSMUSP00000071214 ENSMUSP00000099842 ENSMUSP00000113852 ENSMUSP00000103553 ENSMUSP00000110012 ENSMUSP00000028259 ENSMUSP00000025161 ENSMUSP00000039109 ENSMUSP00000083474 ENSMUSP00000134004 ENSMUSP00000128401 ENSMUSP00000056774 ENSMUSP00000079198 ENSMUSP00000010241 ENSMUSP00000125291 ENSMUSP00000015100 …	over	0.000475966	0.010874	0.196721
Organismal Systems	Immune system	mmu04621	NOD-like receptor signaling pathway	21	578	102	6012	0.036332	0.016966	ENSMUSP00000070993 ENSMUSP00000020886 ENSMUSP00000141132 ENSMUSP00000106845 ENSMUSP00000132435 ENSMUSP00000027015 ENSMUSP00000061958 ENSMUSP00000087587 ENSMUSP00000025263 ENSMUSP00000019997 ENSMUSP00000030051 ENSMUSP00000028881 ENSMUSP00000150354 ENSMUSP00000031327 ENSMUSP00000101829 ENSMUSP00000007803 ENSMUSP00000023693 ENSMUSP00000039600 ENSMUSP00000040307 ENSMUSP00000074885 ENSMUSP00000105736	ENSMUSP00000024739 ENSMUSP00000091921 ENSMUSP00000020673 ENSMUSP00000134023 ENSMUSP00000006235 ENSMUSP00000070993 ENSMUSP00000015484 ENSMUSP00000018651 ENSMUSP00000107829 ENSMUSP00000009036 ENSMUSP00000020886 ENSMUSP00000141132 ENSMUSP00000099842 ENSMUSP00000155155 ENSMUSP00000106845 ENSMUSP00000156154 ENSMUSP00000116235 ENSMUSP00000098303 ENSMUSP00000025912 ENSMUSP00000079198 ENSMUSP00000140536 …	over	0.000565416	0.0119949	0.205882
Human Diseases	Infectious disease: viral	mmu05171	Coronavirus disease - COVID-19	26	578	140	6012	0.044983	0.023287	ENSMUSP00000034966 ENSMUSP00000141132 ENSMUSP00000092502 ENSMUSP00000028259 ENSMUSP00000080854 ENSMUSP00000042433 ENSMUSP00000029623 ENSMUSP00000151586 ENSMUSP00000115722 ENSMUSP00000027015 ENSMUSP00000041652 ENSMUSP00000061958 ENSMUSP00000079163 ENSMUSP00000025263 ENSMUSP00000080523 ENSMUSP00000079340 ENSMUSP00000028881 ENSMUSP00000150354 ENSMUSP00000117834 ENSMUSP00000069004 ENSMUSP00000082548 …	ENSMUSP00000079991 ENSMUSP00000080354 ENSMUSP00000034966 ENSMUSP00000015484 ENSMUSP00000032998 ENSMUSP00000024988 ENSMUSP00000141132 ENSMUSP00000099842 ENSMUSP00000029722 ENSMUSP00000113852 ENSMUSP00000099962 ENSMUSP00000107787 ENSMUSP00000092502 ENSMUSP00000048667 ENSMUSP00000028259 ENSMUSP00000156154 ENSMUSP00000031617 ENSMUSP00000033683 ENSMUSP00000071616 ENSMUSP00000083705 ENSMUSP00000080854 …	over	0.000709847	0.014055	0.185714
Environmental Information Processing	Signal transduction	mmu04064	NF-kappa B signaling pathway	12	578	45	6012	0.020761	0.007485	ENSMUSP00000083587 ENSMUSP00000056669 ENSMUSP00000042433 ENSMUSP00000035065 ENSMUSP00000025263 ENSMUSP00000019997 ENSMUSP00000055714 ENSMUSP00000028881 ENSMUSP00000031327 ENSMUSP00000007803 ENSMUSP00000040307 ENSMUSP00000074885	ENSMUSP00000079991 ENSMUSP00000027777 ENSMUSP00000100075 ENSMUSP00000113852 ENSMUSP00000083587 ENSMUSP00000072859 ENSMUSP00000056669 ENSMUSP00000033617 ENSMUSP00000042433 ENSMUSP00000138788 ENSMUSP00000035065 ENSMUSP00000029812 ENSMUSP00000029574 ENSMUSP00000096829 ENSMUSP00000017799 ENSMUSP00000025867 ENSMUSP00000033939 ENSMUSP00000021844 ENSMUSP00000055919 ENSMUSP00000004330 ENSMUSP00000103528 …	over	0.000819803	0.0152176	0.266667
Human Diseases	Infectious disease: parasitic	mmu05143	African trypanosomiasis	6	578	14	6012	0.010381	0.002329	ENSMUSP00000083587 ENSMUSP00000090897 ENSMUSP00000025263 ENSMUSP00000095794 ENSMUSP00000028881 ENSMUSP00000105736	ENSMUSP00000005057 ENSMUSP00000083587 ENSMUSP00000025912 ENSMUSP00000025541 ENSMUSP00000138788 ENSMUSP00000029574 ENSMUSP00000082207 ENSMUSP00000090897 ENSMUSP00000025263 ENSMUSP00000095794 ENSMUSP00000028881 ENSMUSP00000035092 ENSMUSP00000099583 ENSMUSP00000105736	over	0.00117715	0.0205655	0.428571
Environmental Information Processing	Signaling molecules and interaction	mmu04512	ECM-receptor interaction	8	578	24	6012	0.013841	0.003992	ENSMUSP00000054499 ENSMUSP00000080974 ENSMUSP00000021028 ENSMUSP00000031668 ENSMUSP00000001147 ENSMUSP00000044903 ENSMUSP00000017153 ENSMUSP00000142109	ENSMUSP00000028499 ENSMUSP00000054499 ENSMUSP00000087457 ENSMUSP00000110680 ENSMUSP00000023128 ENSMUSP00000099718 ENSMUSP00000080974 ENSMUSP00000005218 ENSMUSP00000021028 ENSMUSP00000155289 ENSMUSP00000001547 ENSMUSP00000031668 ENSMUSP00000001147 ENSMUSP00000084043 ENSMUSP00000155856 ENSMUSP00000044903 ENSMUSP00000108553 ENSMUSP00000017153 ENSMUSP00000033899 ENSMUSP00000044227 ENSMUSP00000057131 …	over	0.00126867	0.020933	0.333333
Human Diseases	Immune disease	mmu05332	Graft-versus-host disease	6	578	15	6012	0.010381	0.002495	ENSMUSP00000041008 ENSMUSP00000025263 ENSMUSP00000028881 ENSMUSP00000046105 ENSMUSP00000028882 ENSMUSP00000087047	ENSMUSP00000134004 ENSMUSP00000027165 ENSMUSP00000080159 ENSMUSP00000099739 ENSMUSP00000041008 ENSMUSP00000025263 ENSMUSP00000072942 ENSMUSP00000134582 ENSMUSP00000028881 ENSMUSP00000046105 ENSMUSP00000028882 ENSMUSP00000087047 ENSMUSP00000109389 ENSMUSP00000035687 ENSMUSP00000131297	over	0.0018041	0.0282009	0.4
Environmental Information Processing	Signal transduction	mmu04151	PI3K-Akt signaling pathway	20	578	106	6012	0.034602	0.017631	ENSMUSP00000054499 ENSMUSP00000070993 ENSMUSP00000022894 ENSMUSP00000143631 ENSMUSP00000025523 ENSMUSP00000021028 ENSMUSP00000029623 ENSMUSP00000052777 ENSMUSP00000126024 ENSMUSP00000070726 ENSMUSP00000031668 ENSMUSP00000156500 ENSMUSP00000001147 ENSMUSP00000007803 ENSMUSP00000023693 ENSMUSP00000087485 ENSMUSP00000044903 ENSMUSP00000136287 ENSMUSP00000154338 ENSMUSP00000030747	ENSMUSP00000024739 ENSMUSP00000020238 ENSMUSP00000091921 ENSMUSP00000028499 ENSMUSP00000054499 ENSMUSP00000087457 ENSMUSP00000070993 ENSMUSP00000038555 ENSMUSP00000110680 ENSMUSP00000022894 ENSMUSP00000023128 ENSMUSP00000019109 ENSMUSP00000123605 ENSMUSP00000101241 ENSMUSP00000099842 ENSMUSP00000007708 ENSMUSP00000018470 ENSMUSP00000106656 ENSMUSP00000113852 ENSMUSP00000099718 ENSMUSP00000143631 …	over	0.00233495	0.0327884	0.188679
Human Diseases	Immune disease	mmu05310	Asthma	4	578	7	6012	0.00692	0.001164	ENSMUSP00000050497 ENSMUSP00000041008 ENSMUSP00000025263 ENSMUSP00000046105	ENSMUSP00000050497 ENSMUSP00000017799 ENSMUSP00000028467 ENSMUSP00000041008 ENSMUSP00000025263 ENSMUSP00000078875 ENSMUSP00000046105	over	0.00233553	0.0327884	0.571429
Environmental Information Processing	Signaling molecules and interaction	mmu04080	Neuroactive ligand-receptor interaction	7	578	21	6012	0.012111	0.003493	ENSMUSP00000014578 ENSMUSP00000070925 ENSMUSP00000065799 ENSMUSP00000031931 ENSMUSP00000028233 ENSMUSP00000028515 ENSMUSP00000085293	ENSMUSP00000024988 ENSMUSP00000031429 ENSMUSP00000098303 ENSMUSP00000028681 ENSMUSP00000129972 ENSMUSP00000014578 ENSMUSP00000015583 ENSMUSP00000095199 ENSMUSP00000048092 ENSMUSP00000053394 ENSMUSP00000071976 ENSMUSP00000070925 ENSMUSP00000065799 ENSMUSP00000052894 ENSMUSP00000031931 ENSMUSP00000028233 ENSMUSP00000028515 ENSMUSP00000020278 ENSMUSP00000054233 ENSMUSP00000085293 ENSMUSP00000104479	over	0.00256076	0.0327884	0.333333
Human Diseases	Cardiovascular disease	mmu05417	Lipid and atherosclerosis	20	578	107	6012	0.034602	0.017798	ENSMUSP00000083587 ENSMUSP00000056669 ENSMUSP00000080974 ENSMUSP00000029623 ENSMUSP00000027015 ENSMUSP00000061958 ENSMUSP00000025263 ENSMUSP00000028881 ENSMUSP00000031327 ENSMUSP00000007803 ENSMUSP00000039600 ENSMUSP00000034713 ENSMUSP00000040307 ENSMUSP00000074885 ENSMUSP00000001008 ENSMUSP00000030747 ENSMUSP00000132180 ENSMUSP00000015596 ENSMUSP00000105736 ENSMUSP00000125731	ENSMUSP00000028222 ENSMUSP00000024739 ENSMUSP00000015800 ENSMUSP00000020238 ENSMUSP00000020630 ENSMUSP00000091921 ENSMUSP00000027123 ENSMUSP00000152813 ENSMUSP00000140404 ENSMUSP00000096280 ENSMUSP00000015484 ENSMUSP00000100075 ENSMUSP00000019514 ENSMUSP00000071214 ENSMUSP00000005889 ENSMUSP00000016094 ENSMUSP00000083587 ENSMUSP00000156154 ENSMUSP00000030010 ENSMUSP00000025912 ENSMUSP00000022378 …	over	0.002621	0.0327884	0.186916
Human Diseases	Infectious disease: parasitic	mmu05146	Amoebiasis	12	578	51	6012	0.020761	0.008483	ENSMUSP00000054499 ENSMUSP00000017188 ENSMUSP00000056669 ENSMUSP00000029623 ENSMUSP00000025263 ENSMUSP00000018610 ENSMUSP00000031668 ENSMUSP00000028881 ENSMUSP00000031327 ENSMUSP00000074885 ENSMUSP00000049175 ENSMUSP00000105736	ENSMUSP00000066068 ENSMUSP00000021554 ENSMUSP00000000299 ENSMUSP00000022369 ENSMUSP00000068468 ENSMUSP00000054499 ENSMUSP00000109230 ENSMUSP00000114159 ENSMUSP00000017188 ENSMUSP00000030454 ENSMUSP00000102987 ENSMUSP00000085179 ENSMUSP00000025912 ENSMUSP00000056774 ENSMUSP00000056669 ENSMUSP00000021550 ENSMUSP00000025541 ENSMUSP00000005606 ENSMUSP00000138788 ENSMUSP00000065456 ENSMUSP00000029812 …	over	0.00264957	0.0327884	0.235294
Metabolism	Carbohydrate metabolism	mmu00010	Glycolysis / Gluconeogenesis	10	578	40	6012	0.017301	0.006653	ENSMUSP00000034834 ENSMUSP00000075513 ENSMUSP00000080302 ENSMUSP00000113942 ENSMUSP00000011896 ENSMUSP00000148107 ENSMUSP00000030455 ENSMUSP00000017534 ENSMUSP00000033585 ENSMUSP00000005964	ENSMUSP00000034834 ENSMUSP00000128770 ENSMUSP00000075513 ENSMUSP00000097282 ENSMUSP00000000642 ENSMUSP00000032934 ENSMUSP00000031411 ENSMUSP00000080302 ENSMUSP00000113942 ENSMUSP00000051215 ENSMUSP00000011896 ENSMUSP00000028004 ENSMUSP00000038555 ENSMUSP00000148107 ENSMUSP00000106481 ENSMUSP00000061227 ENSMUSP00000033662 ENSMUSP00000022268 ENSMUSP00000049355 ENSMUSP00000150509 ENSMUSP00000021614 …	over	0.00369604	0.0409871	0.25
Organismal Systems	Immune system	mmu04657	IL-17 signaling pathway	10	578	40	6012	0.017301	0.006653	ENSMUSP00000035065 ENSMUSP00000061958 ENSMUSP00000025263 ENSMUSP00000019997 ENSMUSP00000028881 ENSMUSP00000031327 ENSMUSP00000015394 ENSMUSP00000040307 ENSMUSP00000069850 ENSMUSP00000074885	ENSMUSP00000024739 ENSMUSP00000020238 ENSMUSP00000091921 ENSMUSP00000103553 ENSMUSP00000156154 ENSMUSP00000051619 ENSMUSP00000020316 ENSMUSP00000035065 ENSMUSP00000029812 ENSMUSP00000096549 ENSMUSP00000140546 ENSMUSP00000061958 ENSMUSP00000025867 ENSMUSP00000033939 ENSMUSP00000004330 ENSMUSP00000110398 ENSMUSP00000025263 ENSMUSP00000019997 ENSMUSP00000054126 ENSMUSP00000147767 ENSMUSP00000070842 …	over	0.00369604	0.0409871	0.25
Human Diseases	Endocrine and metabolic disease	mmu04940	Type I diabetes mellitus	6	578	17	6012	0.010381	0.002828	ENSMUSP00000041008 ENSMUSP00000025263 ENSMUSP00000028881 ENSMUSP00000046105 ENSMUSP00000028882 ENSMUSP00000087047	ENSMUSP00000027123 ENSMUSP00000134004 ENSMUSP00000027165 ENSMUSP00000080159 ENSMUSP00000099739 ENSMUSP00000041008 ENSMUSP00000025263 ENSMUSP00000072942 ENSMUSP00000134582 ENSMUSP00000028881 ENSMUSP00000046105 ENSMUSP00000028882 ENSMUSP00000087047 ENSMUSP00000109389 ENSMUSP00000035687 ENSMUSP00000111182 ENSMUSP00000131297	over	0.00377418	0.0409871	0.352941
Human Diseases	Infectious disease: viral	mmu05160	Hepatitis C	16	578	81	6012	0.027682	0.013473	ENSMUSP00000070993 ENSMUSP00000022894 ENSMUSP00000099888 ENSMUSP00000141132 ENSMUSP00000143631 ENSMUSP00000042433 ENSMUSP00000126024 ENSMUSP00000020970 ENSMUSP00000025263 ENSMUSP00000093816 ENSMUSP00000019470 ENSMUSP00000150354 ENSMUSP00000023693 ENSMUSP00000034713 ENSMUSP00000030747 ENSMUSP00000125731	ENSMUSP00000070993 ENSMUSP00000022894 ENSMUSP00000019109 ENSMUSP00000123605 ENSMUSP00000099888 ENSMUSP00000141132 ENSMUSP00000071214 ENSMUSP00000099842 ENSMUSP00000007708 ENSMUSP00000018470 ENSMUSP00000022960 ENSMUSP00000143631 ENSMUSP00000156154 ENSMUSP00000056774 ENSMUSP00000020608 ENSMUSP00000079198 ENSMUSP00000102106 ENSMUSP00000125291 ENSMUSP00000009774 ENSMUSP00000042433 ENSMUSP00000051619 …	over	0.0038641	0.0409871	0.197531
Organismal Systems	Immune system	mmu04672	Intestinal immune network for IgA production	4	578	8	6012	0.00692	0.001331	ENSMUSP00000041008 ENSMUSP00000046105 ENSMUSP00000087047 ENSMUSP00000151346	ENSMUSP00000099718 ENSMUSP00000017799 ENSMUSP00000002678 ENSMUSP00000027165 ENSMUSP00000041008 ENSMUSP00000046105 ENSMUSP00000087047 ENSMUSP00000151346	over	0.00431767	0.0442189	0.5
Organismal Systems	Digestive system	mmu04974	Protein digestion and absorption	7	578	24	6012	0.012111	0.003992	ENSMUSP00000083077 ENSMUSP00000022787 ENSMUSP00000031668 ENSMUSP00000001147 ENSMUSP00000022576 ENSMUSP00000044050 ENSMUSP00000031931	ENSMUSP00000039657 ENSMUSP00000099922 ENSMUSP00000083077 ENSMUSP00000130194 ENSMUSP00000034983 ENSMUSP00000075429 ENSMUSP00000022787 ENSMUSP00000001547 ENSMUSP00000031668 ENSMUSP00000126373 ENSMUSP00000090227 ENSMUSP00000001147 ENSMUSP00000000984 ENSMUSP00000108553 ENSMUSP00000023099 ENSMUSP00000071976 ENSMUSP00000022576 ENSMUSP00000033899 ENSMUSP00000044050 ENSMUSP00000031931 ENSMUSP00000104136 …	over	0.00590874	0.0584965	0.291667
Metabolism	Lipid metabolism	mmu00591	Linoleic acid metabolism	3	578	5	6012	0.00519	0.000832	ENSMUSP00000132180 ENSMUSP00000026211 ENSMUSP00000031741	ENSMUSP00000070868 ENSMUSP00000119403 ENSMUSP00000132180 ENSMUSP00000026211 ENSMUSP00000031741	over	0.00762374	0.0730404	0.6
Human Diseases	Cardiovascular disease	mmu05418	Fluid shear stress and atherosclerosis	13	578	65	6012	0.022491	0.010812	ENSMUSP00000071486 ENSMUSP00000083587 ENSMUSP00000021028 ENSMUSP00000061958 ENSMUSP00000015981 ENSMUSP00000025263 ENSMUSP00000030051 ENSMUSP00000028881 ENSMUSP00000134416 ENSMUSP00000028882 ENSMUSP00000017153 ENSMUSP00000040307 ENSMUSP00000007799	ENSMUSP00000071486 ENSMUSP00000024739 ENSMUSP00000020238 ENSMUSP00000091921 ENSMUSP00000028499 ENSMUSP00000140404 ENSMUSP00000019514 ENSMUSP00000016094 ENSMUSP00000118874 ENSMUSP00000083587 ENSMUSP00000026050 ENSMUSP00000135168 ENSMUSP00000056774 ENSMUSP00000152169 ENSMUSP00000007959 ENSMUSP00000098058 ENSMUSP00000021028 ENSMUSP00000029812 ENSMUSP00000029574 ENSMUSP00000005548 ENSMUSP00000035037 …	over	0.00790776	0.0733939	0.2
Human Diseases	Infectious disease: bacterial	mmu05134	Legionellosis	9	578	38	6012	0.015571	0.006321	ENSMUSP00000042457 ENSMUSP00000056669 ENSMUSP00000029623 ENSMUSP00000027015 ENSMUSP00000025263 ENSMUSP00000028881 ENSMUSP00000031327 ENSMUSP00000074885 ENSMUSP00000030747	ENSMUSP00000030164 ENSMUSP00000000299 ENSMUSP00000015800 ENSMUSP00000027123 ENSMUSP00000068468 ENSMUSP00000042457 ENSMUSP00000024988 ENSMUSP00000127330 ENSMUSP00000054556 ENSMUSP00000093955 ENSMUSP00000072859 ENSMUSP00000056669 ENSMUSP00000079306 ENSMUSP00000125291 ENSMUSP00000051814 ENSMUSP00000029476 ENSMUSP00000029812 ENSMUSP00000029623 ENSMUSP00000140546 ENSMUSP00000133815 ENSMUSP00000027015 …	over	0.00843445	0.07591	0.236842
Organismal Systems	Immune system	mmu04620	Toll-like receptor signaling pathway	11	578	52	6012	0.019031	0.008649	ENSMUSP00000141132 ENSMUSP00000056669 ENSMUSP00000029623 ENSMUSP00000061958 ENSMUSP00000025263 ENSMUSP00000028881 ENSMUSP00000023693 ENSMUSP00000039600 ENSMUSP00000087047 ENSMUSP00000040307 ENSMUSP00000001008	ENSMUSP00000141132 ENSMUSP00000107787 ENSMUSP00000156154 ENSMUSP00000056774 ENSMUSP00000056669 ENSMUSP00000051619 ENSMUSP00000020316 ENSMUSP00000098058 ENSMUSP00000029812 ENSMUSP00000029623 ENSMUSP00000140546 ENSMUSP00000034056 ENSMUSP00000017799 ENSMUSP00000035037 ENSMUSP00000061958 ENSMUSP00000025867 ENSMUSP00000033939 ENSMUSP00000021844 ENSMUSP00000004330 ENSMUSP00000001950 ENSMUSP00000082207 …	over	0.00920429	0.0781607	0.211538
Human Diseases	Cardiovascular disease	mmu05412	Arrhythmogenic right ventricular cardiomyopathy	6	578	20	6012	0.010381	0.003327	ENSMUSP00000071486 ENSMUSP00000115062 ENSMUSP00000021028 ENSMUSP00000001592 ENSMUSP00000064536 ENSMUSP00000142109	ENSMUSP00000071486 ENSMUSP00000029699 ENSMUSP00000135935 ENSMUSP00000028499 ENSMUSP00000087457 ENSMUSP00000110680 ENSMUSP00000023128 ENSMUSP00000021142 ENSMUSP00000099718 ENSMUSP00000115062 ENSMUSP00000021028 ENSMUSP00000001592 ENSMUSP00000049007 ENSMUSP00000126373 ENSMUSP00000002029 ENSMUSP00000064536 ENSMUSP00000044227 ENSMUSP00000007130 ENSMUSP00000142109 ENSMUSP00000022567	over	0.00921086	0.0781607	0.3
Organismal Systems	Development and regeneration	mmu04380	Osteoclast differentiation	14	578	74	6012	0.024221	0.012309	ENSMUSP00000141132 ENSMUSP00000025523 ENSMUSP00000021028 ENSMUSP00000070073 ENSMUSP00000061958 ENSMUSP00000015981 ENSMUSP00000025263 ENSMUSP00000024791 ENSMUSP00000064680 ENSMUSP00000028881 ENSMUSP00000150354 ENSMUSP00000023693 ENSMUSP00000028882 ENSMUSP00000040307	ENSMUSP00000079991 ENSMUSP00000140404 ENSMUSP00000141132 ENSMUSP00000099842 ENSMUSP00000113852 ENSMUSP00000016094 ENSMUSP00000099492 ENSMUSP00000156154 ENSMUSP00000072859 ENSMUSP00000056774 ENSMUSP00000102106 ENSMUSP00000033617 ENSMUSP00000025523 ENSMUSP00000104255 ENSMUSP00000094084 ENSMUSP00000051619 ENSMUSP00000071040 ENSMUSP00000098058 ENSMUSP00000100872 ENSMUSP00000021028 ENSMUSP00000029812 …	over	0.00983196	0.0786026	0.189189
Environmental Information Processing	Signaling molecules and interaction	mmu04514	Cell adhesion molecules	9	578	39	6012	0.015571	0.006487	ENSMUSP00000083587 ENSMUSP00000041008 ENSMUSP00000046105 ENSMUSP00000016640 ENSMUSP00000087047 ENSMUSP00000020301 ENSMUSP00000017153 ENSMUSP00000074898 ENSMUSP00000151346	ENSMUSP00000028794 ENSMUSP00000000299 ENSMUSP00000138350 ENSMUSP00000028499 ENSMUSP00000131355 ENSMUSP00000068468 ENSMUSP00000087457 ENSMUSP00000101913 ENSMUSP00000023312 ENSMUSP00000083587 ENSMUSP00000099718 ENSMUSP00000134004 ENSMUSP00000029574 ENSMUSP00000124119 ENSMUSP00000017799 ENSMUSP00000027165 ENSMUSP00000019248 ENSMUSP00000080159 ENSMUSP00000099739 ENSMUSP00000041008 ENSMUSP00000072942 …	over	0.0100569	0.0786026	0.230769
Human Diseases	Infectious disease: bacterial	mmu05133	Pertussis	9	578	39	6012	0.015571	0.006487	ENSMUSP00000056669 ENSMUSP00000027015 ENSMUSP00000061958 ENSMUSP00000025263 ENSMUSP00000018610 ENSMUSP00000028881 ENSMUSP00000028882 ENSMUSP00000104548 ENSMUSP00000028233	ENSMUSP00000000299 ENSMUSP00000068468 ENSMUSP00000087457 ENSMUSP00000142326 ENSMUSP00000147514 ENSMUSP00000019514 ENSMUSP00000023128 ENSMUSP00000024988 ENSMUSP00000000001 ENSMUSP00000156154 ENSMUSP00000056669 ENSMUSP00000007959 ENSMUSP00000051619 ENSMUSP00000029812 ENSMUSP00000027015 ENSMUSP00000078440 ENSMUSP00000061958 ENSMUSP00000025867 ENSMUSP00000077262 ENSMUSP00000025263 ENSMUSP00000018610 …	over	0.0100569	0.0786026	0.230769
Human Diseases	Cancer: overview	mmu05202	Transcriptional misregulation in cancer	11	578	53	6012	0.019031	0.008816	ENSMUSP00000020779 ENSMUSP00000056669 ENSMUSP00000025523 ENSMUSP00000001592 ENSMUSP00000110102 ENSMUSP00000007803 ENSMUSP00000087047 ENSMUSP00000034026 ENSMUSP00000028071 ENSMUSP00000069850 ENSMUSP00000123743	ENSMUSP00000068468 ENSMUSP00000021062 ENSMUSP00000020779 ENSMUSP00000056669 ENSMUSP00000101858 ENSMUSP00000099657 ENSMUSP00000025523 ENSMUSP00000072556 ENSMUSP00000029812 ENSMUSP00000130221 ENSMUSP00000029748 ENSMUSP00000017799 ENSMUSP00000151536 ENSMUSP00000033093 ENSMUSP00000124509 ENSMUSP00000099928 ENSMUSP00000025867 ENSMUSP00000001592 ENSMUSP00000110102 ENSMUSP00000019911 ENSMUSP00000099994 …	over	0.0106388	0.0810185	0.207547
Human Diseases	Infectious disease: bacterial	mmu05152	Tuberculosis	16	578	90	6012	0.027682	0.01497	ENSMUSP00000141132 ENSMUSP00000056669 ENSMUSP00000029623 ENSMUSP00000095171 ENSMUSP00000061958 ENSMUSP00000024932 ENSMUSP00000041008 ENSMUSP00000025263 ENSMUSP00000018610 ENSMUSP00000028881 ENSMUSP00000046105 ENSMUSP00000032239 ENSMUSP00000028882 ENSMUSP00000069850 ENSMUSP00000030747 ENSMUSP00000125731	ENSMUSP00000061493 ENSMUSP00000000299 ENSMUSP00000025217 ENSMUSP00000028045 ENSMUSP00000027123 ENSMUSP00000068468 ENSMUSP00000121203 ENSMUSP00000122474 ENSMUSP00000099399 ENSMUSP00000101972 ENSMUSP00000109230 ENSMUSP00000033053 ENSMUSP00000015667 ENSMUSP00000040756 ENSMUSP00000019514 ENSMUSP00000024988 ENSMUSP00000141132 ENSMUSP00000099842 ENSMUSP00000113852 ENSMUSP00000013304 ENSMUSP00000156154 …	over	0.0109771	0.0815049	0.177778
Human Diseases	Infectious disease: viral	mmu05162	Measles	14	578	76	6012	0.024221	0.012641	ENSMUSP00000141132 ENSMUSP00000028259 ENSMUSP00000042433 ENSMUSP00000029623 ENSMUSP00000126024 ENSMUSP00000019997 ENSMUSP00000028881 ENSMUSP00000150354 ENSMUSP00000007803 ENSMUSP00000023693 ENSMUSP00000028882 ENSMUSP00000040307 ENSMUSP00000030747 ENSMUSP00000125731	ENSMUSP00000113071 ENSMUSP00000015800 ENSMUSP00000141132 ENSMUSP00000071214 ENSMUSP00000099842 ENSMUSP00000020640 ENSMUSP00000107787 ENSMUSP00000028259 ENSMUSP00000056774 ENSMUSP00000079306 ENSMUSP00000079198 ENSMUSP00000125291 ENSMUSP00000042433 ENSMUSP00000022925 ENSMUSP00000102980 ENSMUSP00000020316 ENSMUSP00000102981 ENSMUSP00000100872 ENSMUSP00000029812 ENSMUSP00000029623 ENSMUSP00000096829 …	over	0.0123985	0.0898133	0.184211
Organismal Systems	Immune system	mmu04612	Antigen processing and presentation	8	578	34	6012	0.013841	0.005655	ENSMUSP00000134735 ENSMUSP00000128401 ENSMUSP00000095171 ENSMUSP00000041008 ENSMUSP00000025263 ENSMUSP00000019470 ENSMUSP00000099534 ENSMUSP00000046105	ENSMUSP00000028222 ENSMUSP00000024739 ENSMUSP00000015800 ENSMUSP00000020630 ENSMUSP00000091921 ENSMUSP00000028683 ENSMUSP00000020637 ENSMUSP00000003912 ENSMUSP00000006235 ENSMUSP00000015667 ENSMUSP00000134735 ENSMUSP00000025161 ENSMUSP00000134004 ENSMUSP00000128401 ENSMUSP00000079306 ENSMUSP00000152169 ENSMUSP00000100564 ENSMUSP00000025197 ENSMUSP00000133815 ENSMUSP00000095171 ENSMUSP00000105647 …	over	0.0132661	0.0938104	0.235294
Human Diseases	Cardiovascular disease	mmu05410	Hypertrophic cardiomyopathy	7	578	28	6012	0.012111	0.004657	ENSMUSP00000071486 ENSMUSP00000087736 ENSMUSP00000021028 ENSMUSP00000103546 ENSMUSP00000025263 ENSMUSP00000142109 ENSMUSP00000080538	ENSMUSP00000071486 ENSMUSP00000029699 ENSMUSP00000135935 ENSMUSP00000028499 ENSMUSP00000087736 ENSMUSP00000087457 ENSMUSP00000029549 ENSMUSP00000110680 ENSMUSP00000023128 ENSMUSP00000109325 ENSMUSP00000003575 ENSMUSP00000021142 ENSMUSP00000109326 ENSMUSP00000099718 ENSMUSP00000021028 ENSMUSP00000002678 ENSMUSP00000103546 ENSMUSP00000025263 ENSMUSP00000132499 ENSMUSP00000063166 ENSMUSP00000126373 …	over	0.0144268	0.0996455	0.25
Cellular Processes	Cell growth and death	mmu04115	p53 signaling pathway	6	578	22	6012	0.010381	0.003659	ENSMUSP00000126024 ENSMUSP00000007803 ENSMUSP00000044903 ENSMUSP00000154338 ENSMUSP00000030747 ENSMUSP00000125731	ENSMUSP00000108262 ENSMUSP00000125291 ENSMUSP00000140546 ENSMUSP00000033093 ENSMUSP00000126024 ENSMUSP00000050374 ENSMUSP00000147767 ENSMUSP00000097287 ENSMUSP00000078998 ENSMUSP00000026416 ENSMUSP00000039586 ENSMUSP00000007803 ENSMUSP00000044903 ENSMUSP00000020099 ENSMUSP00000006911 ENSMUSP00000013807 ENSMUSP00000154338 ENSMUSP00000002152 ENSMUSP00000066679 ENSMUSP00000030747 ENSMUSP00000076160 …	over	0.0150289	0.101445	0.272727
Human Diseases	Cardiovascular disease	mmu05414	Dilated cardiomyopathy	7	578	29	6012	0.012111	0.004824	ENSMUSP00000071486 ENSMUSP00000087736 ENSMUSP00000021028 ENSMUSP00000103546 ENSMUSP00000025263 ENSMUSP00000142109 ENSMUSP00000080538	ENSMUSP00000071486 ENSMUSP00000029699 ENSMUSP00000135935 ENSMUSP00000028499 ENSMUSP00000087736 ENSMUSP00000087457 ENSMUSP00000029549 ENSMUSP00000110680 ENSMUSP00000023128 ENSMUSP00000109325 ENSMUSP00000003575 ENSMUSP00000021142 ENSMUSP00000109326 ENSMUSP00000099718 ENSMUSP00000130594 ENSMUSP00000085179 ENSMUSP00000005606 ENSMUSP00000021028 ENSMUSP00000099573 ENSMUSP00000002678 ENSMUSP00000103546 …	over	0.0174864	0.11541	0.241379
Human Diseases	Endocrine and metabolic disease	mmu04933	AGE-RAGE signaling pathway in diabetic complications	10	578	51	6012	0.017301	0.008483	ENSMUSP00000054499 ENSMUSP00000141132 ENSMUSP00000083587 ENSMUSP00000061958 ENSMUSP00000025263 ENSMUSP00000031668 ENSMUSP00000028881 ENSMUSP00000028882 ENSMUSP00000015596 ENSMUSP00000105736	ENSMUSP00000079991 ENSMUSP00000054499 ENSMUSP00000025337 ENSMUSP00000015484 ENSMUSP00000107829 ENSMUSP00000141132 ENSMUSP00000083587 ENSMUSP00000156154 ENSMUSP00000025912 ENSMUSP00000056774 ENSMUSP00000054634 ENSMUSP00000051619 ENSMUSP00000102980 ENSMUSP00000138788 ENSMUSP00000102981 ENSMUSP00000029445 ENSMUSP00000098058 ENSMUSP00000029812 ENSMUSP00000029574 ENSMUSP00000033093 ENSMUSP00000002678 …	over	0.0213618	0.137923	0.196078
Human Diseases	Infectious disease: viral	mmu05169	Epstein-Barr virus infection	18	578	115	6012	0.031142	0.019128	ENSMUSP00000141132 ENSMUSP00000083587 ENSMUSP00000128401 ENSMUSP00000042433 ENSMUSP00000029623 ENSMUSP00000061958 ENSMUSP00000126024 ENSMUSP00000041008 ENSMUSP00000025263 ENSMUSP00000019997 ENSMUSP00000150354 ENSMUSP00000099534 ENSMUSP00000046105 ENSMUSP00000082548 ENSMUSP00000023693 ENSMUSP00000040307 ENSMUSP00000030747 ENSMUSP00000125731	ENSMUSP00000028062 ENSMUSP00000028683 ENSMUSP00000003912 ENSMUSP00000079991 ENSMUSP00000071054 ENSMUSP00000027432 ENSMUSP00000007212 ENSMUSP00000100075 ENSMUSP00000021049 ENSMUSP00000124382 ENSMUSP00000101913 ENSMUSP00000141132 ENSMUSP00000099842 ENSMUSP00000021063 ENSMUSP00000017365 ENSMUSP00000113852 ENSMUSP00000133571 ENSMUSP00000083587 ENSMUSP00000025161 ENSMUSP00000022380 ENSMUSP00000072859 …	over	0.0253414	0.160136	0.156522
Human Diseases	Infectious disease: viral	mmu05165	Human papillomavirus infection	21	578	141	6012	0.036332	0.023453	ENSMUSP00000034834 ENSMUSP00000054499 ENSMUSP00000141132 ENSMUSP00000035065 ENSMUSP00000021028 ENSMUSP00000126024 ENSMUSP00000024932 ENSMUSP00000025263 ENSMUSP00000070726 ENSMUSP00000031668 ENSMUSP00000156500 ENSMUSP00000028288 ENSMUSP00000150354 ENSMUSP00000082548 ENSMUSP00000001147 ENSMUSP00000023693 ENSMUSP00000044903 ENSMUSP00000058629 ENSMUSP00000031542 ENSMUSP00000104548 ENSMUSP00000154338	ENSMUSP00000034834 ENSMUSP00000128770 ENSMUSP00000110314 ENSMUSP00000028499 ENSMUSP00000095433 ENSMUSP00000108011 ENSMUSP00000006435 ENSMUSP00000054499 ENSMUSP00000122474 ENSMUSP00000087457 ENSMUSP00000099399 ENSMUSP00000002091 ENSMUSP00000110680 ENSMUSP00000040756 ENSMUSP00000023128 ENSMUSP00000141132 ENSMUSP00000099842 ENSMUSP00000007708 ENSMUSP00000150509 ENSMUSP00000022904 ENSMUSP00000099718 …	over	0.0275574	0.170511	0.148936
Organismal Systems	Immune system	mmu04613	Neutrophil extracellular trap formation	14	578	84	6012	0.024221	0.013972	ENSMUSP00000071486 ENSMUSP00000020779 ENSMUSP00000082682 ENSMUSP00000021028 ENSMUSP00000029623 ENSMUSP00000027015 ENSMUSP00000061958 ENSMUSP00000141648 ENSMUSP00000039472 ENSMUSP00000040307 ENSMUSP00000065799 ENSMUSP00000028233 ENSMUSP00000015596 ENSMUSP00000105736	ENSMUSP00000071486 ENSMUSP00000000299 ENSMUSP00000068468 ENSMUSP00000079991 ENSMUSP00000020673 ENSMUSP00000134023 ENSMUSP00000140404 ENSMUSP00000016463 ENSMUSP00000015484 ENSMUSP00000016081 ENSMUSP00000034049 ENSMUSP00000024988 ENSMUSP00000101913 ENSMUSP00000009036 ENSMUSP00000085006 ENSMUSP00000106099 ENSMUSP00000078239 ENSMUSP00000113852 ENSMUSP00000107787 ENSMUSP00000016094 ENSMUSP00000020779 …	over	0.0281437	0.170585	0.166667
Cellular Processes	Transport and catabolism	mmu04145	Phagosome	15	578	93	6012	0.025952	0.015469	ENSMUSP00000071486 ENSMUSP00000060246 ENSMUSP00000020779 ENSMUSP00000128401 ENSMUSP00000056669 ENSMUSP00000080974 ENSMUSP00000021028 ENSMUSP00000029623 ENSMUSP00000001513 ENSMUSP00000024932 ENSMUSP00000041008 ENSMUSP00000046105 ENSMUSP00000044903 ENSMUSP00000027639 ENSMUSP00000099617	ENSMUSP00000018851 ENSMUSP00000061493 ENSMUSP00000071486 ENSMUSP00000000299 ENSMUSP00000028045 ENSMUSP00000110314 ENSMUSP00000028499 ENSMUSP00000068468 ENSMUSP00000020637 ENSMUSP00000003912 ENSMUSP00000006435 ENSMUSP00000122474 ENSMUSP00000087457 ENSMUSP00000076777 ENSMUSP00000023486 ENSMUSP00000099399 ENSMUSP00000140404 ENSMUSP00000101972 ENSMUSP00000051033 ENSMUSP00000109230 ENSMUSP00000078429 …	over	0.0308043	0.182978	0.16129
Organismal Systems	Endocrine system	mmu04915	Estrogen signaling pathway	10	578	55	6012	0.017301	0.009148	ENSMUSP00000007272 ENSMUSP00000079699 ENSMUSP00000099420 ENSMUSP00000007280 ENSMUSP00000017270 ENSMUSP00000007318 ENSMUSP00000007317 ENSMUSP00000099416 ENSMUSP00000017741 ENSMUSP00000105736	ENSMUSP00000024739 ENSMUSP00000015800 ENSMUSP00000020238 ENSMUSP00000091921 ENSMUSP00000121203 ENSMUSP00000142326 ENSMUSP00000007272 ENSMUSP00000079699 ENSMUSP00000107829 ENSMUSP00000019514 ENSMUSP00000099420 ENSMUSP00000032508 ENSMUSP00000000001 ENSMUSP00000156154 ENSMUSP00000130594 ENSMUSP00000085179 ENSMUSP00000025912 ENSMUSP00000056774 ENSMUSP00000079306 ENSMUSP00000102106 ENSMUSP00000025541 …	over	0.0346209	0.201616	0.181818
Human Diseases	Immune disease	mmu05330	Allograft rejection	4	578	14	6012	0.00692	0.002329	ENSMUSP00000041008 ENSMUSP00000025263 ENSMUSP00000046105 ENSMUSP00000087047	ENSMUSP00000134004 ENSMUSP00000017799 ENSMUSP00000027165 ENSMUSP00000080159 ENSMUSP00000099739 ENSMUSP00000041008 ENSMUSP00000025263 ENSMUSP00000072942 ENSMUSP00000134582 ENSMUSP00000046105 ENSMUSP00000087047 ENSMUSP00000109389 ENSMUSP00000035687 ENSMUSP00000131297	over	0.0387525	0.221336	0.285714
Cellular Processes	Cell growth and death	mmu04217	Necroptosis	13	578	81	6012	0.022491	0.013473	ENSMUSP00000141132 ENSMUSP00000082682 ENSMUSP00000117987 ENSMUSP00000027015 ENSMUSP00000015981 ENSMUSP00000025263 ENSMUSP00000019997 ENSMUSP00000028881 ENSMUSP00000150354 ENSMUSP00000023693 ENSMUSP00000028882 ENSMUSP00000029018 ENSMUSP00000125731	ENSMUSP00000024739 ENSMUSP00000091921 ENSMUSP00000022322 ENSMUSP00000020673 ENSMUSP00000134023 ENSMUSP00000027777 ENSMUSP00000016463 ENSMUSP00000025891 ENSMUSP00000041104 ENSMUSP00000071231 ENSMUSP00000015484 ENSMUSP00000016081 ENSMUSP00000034049 ENSMUSP00000035743 ENSMUSP00000009036 ENSMUSP00000141132 ENSMUSP00000099842 ENSMUSP00000068895 ENSMUSP00000155155 ENSMUSP00000108356 ENSMUSP00000029382 …	over	0.0440192	0.246674	0.160494
Metabolism	Glycan biosynthesis and metabolism	mmu00533	Glycosaminoglycan biosynthesis - keratan sulfate	2	578	4	6012	0.00346	0.000665	ENSMUSP00000154853 ENSMUSP00000030121	ENSMUSP00000136327 ENSMUSP00000060247 ENSMUSP00000154853 ENSMUSP00000030121	over	0.04855	0.267025	0.5
Metabolism	Amino acid metabolism	mmu00270	Cysteine and methionine metabolism	6	578	29	6012	0.010381	0.004824	ENSMUSP00000034097 ENSMUSP00000148107 ENSMUSP00000110897 ENSMUSP00000129704 ENSMUSP00000059173 ENSMUSP00000006611	ENSMUSP00000019323 ENSMUSP00000034097 ENSMUSP00000064755 ENSMUSP00000148107 ENSMUSP00000004202 ENSMUSP00000026196 ENSMUSP00000127198 ENSMUSP00000020991 ENSMUSP00000033098 ENSMUSP00000029490 ENSMUSP00000025542 ENSMUSP00000110897 ENSMUSP00000034905 ENSMUSP00000087118 ENSMUSP00000043061 ENSMUSP00000055743 ENSMUSP00000048222 ENSMUSP00000020957 ENSMUSP00000029769 ENSMUSP00000011055 ENSMUSP00000078630 …	over	0.0539871	0.286324	0.206897
Organismal Systems	Immune system	mmu04658	Th1 and Th2 cell differentiation	6	578	29	6012	0.010381	0.004824	ENSMUSP00000141132 ENSMUSP00000061958 ENSMUSP00000041008 ENSMUSP00000028288 ENSMUSP00000150354 ENSMUSP00000046105	ENSMUSP00000141132 ENSMUSP00000099842 ENSMUSP00000156154 ENSMUSP00000078741 ENSMUSP00000051619 ENSMUSP00000071040 ENSMUSP00000102980 ENSMUSP00000102981 ENSMUSP00000029812 ENSMUSP00000089708 ENSMUSP00000061958 ENSMUSP00000025867 ENSMUSP00000033939 ENSMUSP00000004330 ENSMUSP00000125722 ENSMUSP00000041008 ENSMUSP00000028288 ENSMUSP00000099944 ENSMUSP00000150354 ENSMUSP00000046105 ENSMUSP00000040694 …	over	0.0539871	0.286324	0.206897
Human Diseases	Infectious disease: viral	mmu05167	Kaposi sarcoma-associated herpesvirus infection	15	578	101	6012	0.025952	0.0168	ENSMUSP00000141132 ENSMUSP00000083587 ENSMUSP00000035065 ENSMUSP00000016672 ENSMUSP00000061958 ENSMUSP00000126024 ENSMUSP00000053822 ENSMUSP00000150354 ENSMUSP00000031327 ENSMUSP00000023693 ENSMUSP00000087485 ENSMUSP00000087047 ENSMUSP00000074885 ENSMUSP00000030747 ENSMUSP00000125731	ENSMUSP00000079991 ENSMUSP00000100075 ENSMUSP00000019514 ENSMUSP00000024988 ENSMUSP00000101241 ENSMUSP00000141132 ENSMUSP00000099842 ENSMUSP00000003370 ENSMUSP00000106656 ENSMUSP00000113852 ENSMUSP00000083587 ENSMUSP00000037180 ENSMUSP00000156154 ENSMUSP00000134004 ENSMUSP00000056774 ENSMUSP00000049584 ENSMUSP00000051619 ENSMUSP00000071040 ENSMUSP00000038150 ENSMUSP00000020316 ENSMUSP00000029445 …	over	0.0578137	0.30124	0.148515
Organismal Systems	Immune system	mmu04622	RIG-I-like receptor signaling pathway	6	578	30	6012	0.010381	0.00499	ENSMUSP00000028259 ENSMUSP00000042433 ENSMUSP00000061958 ENSMUSP00000025263 ENSMUSP00000082548 ENSMUSP00000040307	ENSMUSP00000000804 ENSMUSP00000028259 ENSMUSP00000042433 ENSMUSP00000020316 ENSMUSP00000029812 ENSMUSP00000140546 ENSMUSP00000017974 ENSMUSP00000034621 ENSMUSP00000061958 ENSMUSP00000025867 ENSMUSP00000033939 ENSMUSP00000021844 ENSMUSP00000004330 ENSMUSP00000103528 ENSMUSP00000025263 ENSMUSP00000044769 ENSMUSP00000003284 ENSMUSP00000054126 ENSMUSP00000082548 ENSMUSP00000034359 ENSMUSP00000020634 …	over	0.0622398	0.318711	0.2
Organismal Systems	Immune system	mmu04610	Complement and coagulation cascades	6	578	31	6012	0.010381	0.005156	ENSMUSP00000083204 ENSMUSP00000141648 ENSMUSP00000039472 ENSMUSP00000014578 ENSMUSP00000022576 ENSMUSP00000028233	ENSMUSP00000000299 ENSMUSP00000068468 ENSMUSP00000033053 ENSMUSP00000024988 ENSMUSP00000048667 ENSMUSP00000083204 ENSMUSP00000028681 ENSMUSP00000074902 ENSMUSP00000002284 ENSMUSP00000068971 ENSMUSP00000032203 ENSMUSP00000069418 ENSMUSP00000039586 ENSMUSP00000036747 ENSMUSP00000129972 ENSMUSP00000040246 ENSMUSP00000141648 ENSMUSP00000039472 ENSMUSP00000014578 ENSMUSP00000023629 ENSMUSP00000022368 …	over	0.0711962	0.352421	0.193548
Organismal Systems	Immune system	mmu04623	Cytosolic DNA-sensing pathway	6	578	31	6012	0.010381	0.005156	ENSMUSP00000042433 ENSMUSP00000027015 ENSMUSP00000028881 ENSMUSP00000000266 ENSMUSP00000039600 ENSMUSP00000029018	ENSMUSP00000042433 ENSMUSP00000020316 ENSMUSP00000029812 ENSMUSP00000027015 ENSMUSP00000050971 ENSMUSP00000025867 ENSMUSP00000033939 ENSMUSP00000021844 ENSMUSP00000004330 ENSMUSP00000003284 ENSMUSP00000054126 ENSMUSP00000021405 ENSMUSP00000103028 ENSMUSP00000004786 ENSMUSP00000028881 ENSMUSP00000084252 ENSMUSP00000000266 ENSMUSP00000022830 ENSMUSP00000033056 ENSMUSP00000063331 ENSMUSP00000029741 …	over	0.0711962	0.352421	0.193548
Human Diseases	Infectious disease: parasitic	mmu05142	Chagas disease	9	578	55	6012	0.015571	0.009148	ENSMUSP00000029623 ENSMUSP00000061958 ENSMUSP00000025263 ENSMUSP00000018610 ENSMUSP00000028881 ENSMUSP00000039600 ENSMUSP00000049175 ENSMUSP00000001008 ENSMUSP00000105736	ENSMUSP00000003912 ENSMUSP00000142326 ENSMUSP00000024988 ENSMUSP00000007708 ENSMUSP00000000001 ENSMUSP00000156154 ENSMUSP00000085179 ENSMUSP00000025912 ENSMUSP00000056774 ENSMUSP00000020608 ENSMUSP00000025541 ENSMUSP00000009774 ENSMUSP00000051619 ENSMUSP00000029812 ENSMUSP00000029623 ENSMUSP00000140546 ENSMUSP00000002678 ENSMUSP00000043190 ENSMUSP00000035037 ENSMUSP00000061958 ENSMUSP00000025867 …	over	0.077046	0.375126	0.163636
Organismal Systems	Endocrine system	mmu03320	PPAR signaling pathway	6	578	32	6012	0.010381	0.005323	ENSMUSP00000029046 ENSMUSP00000080974 ENSMUSP00000029041 ENSMUSP00000136944 ENSMUSP00000070709 ENSMUSP00000026220	ENSMUSP00000042351 ENSMUSP00000027153 ENSMUSP00000038555 ENSMUSP00000034046 ENSMUSP00000029046 ENSMUSP00000108528 ENSMUSP00000046585 ENSMUSP00000030340 ENSMUSP00000063412 ENSMUSP00000078971 ENSMUSP00000072483 ENSMUSP00000080974 ENSMUSP00000030345 ENSMUSP00000033182 ENSMUSP00000063325 ENSMUSP00000029041 ENSMUSP00000148768 ENSMUSP00000109611 ENSMUSP00000025835 ENSMUSP00000136944 ENSMUSP00000045291 …	over	0.0808536	0.387315	0.1875
		mmu04936	Alcoholic liver disease	10	578	64	6012	0.017301	0.010645	ENSMUSP00000056669 ENSMUSP00000005964 ENSMUSP00000061958 ENSMUSP00000025263 ENSMUSP00000028881 ENSMUSP00000031327 ENSMUSP00000040307 ENSMUSP00000074885 ENSMUSP00000028233 ENSMUSP00000026220	ENSMUSP00000052872 ENSMUSP00000031411 ENSMUSP00000099634 ENSMUSP00000028004 ENSMUSP00000024988 ENSMUSP00000063412 ENSMUSP00000056669 ENSMUSP00000067767 ENSMUSP00000072483 ENSMUSP00000020316 ENSMUSP00000029812 ENSMUSP00000063325 ENSMUSP00000041260 ENSMUSP00000140546 ENSMUSP00000124846 ENSMUSP00000025835 ENSMUSP00000005964 ENSMUSP00000061958 ENSMUSP00000025867 ENSMUSP00000099490 ENSMUSP00000033939 …	over	0.0830532	0.391536	0.15625
Metabolism	Lipid metabolism	mmu00590	Arachidonic acid metabolism	4	578	18	6012	0.00692	0.002994	ENSMUSP00000035065 ENSMUSP00000059977 ENSMUSP00000132180 ENSMUSP00000026211	ENSMUSP00000016033 ENSMUSP00000003017 ENSMUSP00000035065 ENSMUSP00000049394 ENSMUSP00000028162 ENSMUSP00000059977 ENSMUSP00000031982 ENSMUSP00000047712 ENSMUSP00000070868 ENSMUSP00000026148 ENSMUSP00000050292 ENSMUSP00000081010 ENSMUSP00000030935 ENSMUSP00000026795 ENSMUSP00000119403 ENSMUSP00000099916 ENSMUSP00000132180 ENSMUSP00000026211	over	0.0873946	0.399326	0.222222
Human Diseases	Cancer: overview	mmu05204	Chemical carcinogenesis - DNA adducts	4	578	18	6012	0.00692	0.002994	ENSMUSP00000035065 ENSMUSP00000101981 ENSMUSP00000026211 ENSMUSP00000031741	ENSMUSP00000118874 ENSMUSP00000047551 ENSMUSP00000026050 ENSMUSP00000035065 ENSMUSP00000058683 ENSMUSP00000049394 ENSMUSP00000031897 ENSMUSP00000031982 ENSMUSP00000112923 ENSMUSP00000129565 ENSMUSP00000001715 ENSMUSP00000028005 ENSMUSP00000004134 ENSMUSP00000091181 ENSMUSP00000029489 ENSMUSP00000101981 ENSMUSP00000026211 ENSMUSP00000031741	over	0.0873946	0.399326	0.222222
Metabolism	Amino acid metabolism	mmu00220	Arginine biosynthesis	3	578	12	6012	0.00519	0.001996	ENSMUSP00000034097 ENSMUSP00000018610 ENSMUSP00000099617	ENSMUSP00000022322 ENSMUSP00000034097 ENSMUSP00000026196 ENSMUSP00000110158 ENSMUSP00000110155 ENSMUSP00000021550 ENSMUSP00000124274 ENSMUSP00000018610 ENSMUSP00000083375 ENSMUSP00000099904 ENSMUSP00000020161 ENSMUSP00000099617	over	0.101003	0.448471	0.25
Human Diseases	Cancer: specific types	mmu05222	Small cell lung cancer	6	578	34	6012	0.010381	0.005655	ENSMUSP00000054499 ENSMUSP00000035065 ENSMUSP00000126024 ENSMUSP00000018610 ENSMUSP00000007803 ENSMUSP00000030747	ENSMUSP00000028499 ENSMUSP00000054499 ENSMUSP00000087457 ENSMUSP00000056774 ENSMUSP00000125291 ENSMUSP00000035065 ENSMUSP00000029812 ENSMUSP00000033093 ENSMUSP00000035037 ENSMUSP00000025867 ENSMUSP00000126024 ENSMUSP00000033939 ENSMUSP00000004330 ENSMUSP00000018610 ENSMUSP00000101315 ENSMUSP00000147767 ENSMUSP00000077757 ENSMUSP00000026416 ENSMUSP00000103878 ENSMUSP00000007803 ENSMUSP00000106025 …	over	0.102237	0.448471	0.176471
Organismal Systems	Sensory system	mmu04740	Olfactory transduction	4	578	19	6012	0.00692	0.00316	ENSMUSP00000081956 ENSMUSP00000149022 ENSMUSP00000150761 ENSMUSP00000143864	ENSMUSP00000019514 ENSMUSP00000101241 ENSMUSP00000005606 ENSMUSP00000099573 ENSMUSP00000136963 ENSMUSP00000086114 ENSMUSP00000129999 ENSMUSP00000104208 ENSMUSP00000126373 ENSMUSP00000081956 ENSMUSP00000073268 ENSMUSP00000149022 ENSMUSP00000150162 ENSMUSP00000150761 ENSMUSP00000149479 ENSMUSP00000149674 ENSMUSP00000151882 ENSMUSP00000150203 ENSMUSP00000143864	over	0.10268	0.448471	0.210526
Metabolism	Metabolism of cofactors and vitamins	mmu00830	Retinol metabolism	3	578	13	6012	0.00519	0.002162	ENSMUSP00000005964 ENSMUSP00000026211 ENSMUSP00000031741	ENSMUSP00000124066 ENSMUSP00000058683 ENSMUSP00000005964 ENSMUSP00000022821 ENSMUSP00000008579 ENSMUSP00000068568 ENSMUSP00000122552 ENSMUSP00000041175 ENSMUSP00000025656 ENSMUSP00000027053 ENSMUSP00000023214 ENSMUSP00000026211 ENSMUSP00000031741	over	0.122336	0.511745	0.230769
Organismal Systems	Endocrine system	mmu04913	Ovarian steroidogenesis	3	578	13	6012	0.00519	0.002162	ENSMUSP00000035065 ENSMUSP00000034713 ENSMUSP00000132180	ENSMUSP00000130594 ENSMUSP00000085179 ENSMUSP00000005606 ENSMUSP00000035065 ENSMUSP00000099573 ENSMUSP00000021649 ENSMUSP00000088837 ENSMUSP00000126448 ENSMUSP00000070868 ENSMUSP00000034713 ENSMUSP00000027989 ENSMUSP00000026795 ENSMUSP00000132180	over	0.122336	0.511745	0.230769
Human Diseases	Immune disease	mmu05320	Autoimmune thyroid disease	3	578	13	6012	0.00519	0.002162	ENSMUSP00000041008 ENSMUSP00000046105 ENSMUSP00000087047	ENSMUSP00000134004 ENSMUSP00000017799 ENSMUSP00000027165 ENSMUSP00000080159 ENSMUSP00000099739 ENSMUSP00000041008 ENSMUSP00000072942 ENSMUSP00000134582 ENSMUSP00000046105 ENSMUSP00000087047 ENSMUSP00000109389 ENSMUSP00000035687 ENSMUSP00000131297	over	0.122336	0.511745	0.230769
Organismal Systems	Immune system	mmu04659	Th17 cell differentiation	6	578	36	6012	0.010381	0.005988	ENSMUSP00000141132 ENSMUSP00000061958 ENSMUSP00000041008 ENSMUSP00000028881 ENSMUSP00000150354 ENSMUSP00000046105	ENSMUSP00000024739 ENSMUSP00000091921 ENSMUSP00000141132 ENSMUSP00000099842 ENSMUSP00000156154 ENSMUSP00000051619 ENSMUSP00000071040 ENSMUSP00000102980 ENSMUSP00000102981 ENSMUSP00000029812 ENSMUSP00000099510 ENSMUSP00000002678 ENSMUSP00000089708 ENSMUSP00000061958 ENSMUSP00000025867 ENSMUSP00000033939 ENSMUSP00000004330 ENSMUSP00000125722 ENSMUSP00000041008 ENSMUSP00000120152 ENSMUSP00000025393 …	over	0.126274	0.520881	0.166667
Human Diseases	Infectious disease: viral	mmu05163	Human cytomegalovirus infection	15	578	114	6012	0.025952	0.018962	ENSMUSP00000128401 ENSMUSP00000035065 ENSMUSP00000021028 ENSMUSP00000061958 ENSMUSP00000126024 ENSMUSP00000025263 ENSMUSP00000028881 ENSMUSP00000099534 ENSMUSP00000039600 ENSMUSP00000087485 ENSMUSP00000154338 ENSMUSP00000001008 ENSMUSP00000030747 ENSMUSP00000105736 ENSMUSP00000125731	ENSMUSP00000028499 ENSMUSP00000028683 ENSMUSP00000003912 ENSMUSP00000152813 ENSMUSP00000096280 ENSMUSP00000022622 ENSMUSP00000142326 ENSMUSP00000019514 ENSMUSP00000101241 ENSMUSP00000099842 ENSMUSP00000020930 ENSMUSP00000106656 ENSMUSP00000025161 ENSMUSP00000000001 ENSMUSP00000156154 ENSMUSP00000069549 ENSMUSP00000130594 ENSMUSP00000134004 ENSMUSP00000128401 ENSMUSP00000085179 ENSMUSP00000025912 …	over	0.129732	0.522398	0.131579
Organismal Systems	Circulatory system	mmu04261	Adrenergic signaling in cardiomyocytes	8	578	53	6012	0.013841	0.008816	ENSMUSP00000087736 ENSMUSP00000083077 ENSMUSP00000061958 ENSMUSP00000103546 ENSMUSP00000070726 ENSMUSP00000156500 ENSMUSP00000080538 ENSMUSP00000105736	ENSMUSP00000039657 ENSMUSP00000099922 ENSMUSP00000020107 ENSMUSP00000135935 ENSMUSP00000087736 ENSMUSP00000083077 ENSMUSP00000029549 ENSMUSP00000142326 ENSMUSP00000019514 ENSMUSP00000007708 ENSMUSP00000109325 ENSMUSP00000003575 ENSMUSP00000021142 ENSMUSP00000109326 ENSMUSP00000039109 ENSMUSP00000000001 ENSMUSP00000156154 ENSMUSP00000083474 ENSMUSP00000130594 ENSMUSP00000085179 ENSMUSP00000025912 …	over	0.131919	0.522398	0.150943
Organismal Systems	Endocrine system	mmu04926	Relaxin signaling pathway	8	578	53	6012	0.013841	0.008816	ENSMUSP00000061958 ENSMUSP00000018610 ENSMUSP00000031668 ENSMUSP00000087485 ENSMUSP00000015394 ENSMUSP00000049175 ENSMUSP00000099617 ENSMUSP00000105736	ENSMUSP00000142326 ENSMUSP00000101241 ENSMUSP00000106656 ENSMUSP00000000001 ENSMUSP00000156154 ENSMUSP00000130594 ENSMUSP00000085179 ENSMUSP00000025912 ENSMUSP00000056774 ENSMUSP00000102106 ENSMUSP00000005606 ENSMUSP00000051619 ENSMUSP00000029445 ENSMUSP00000029812 ENSMUSP00000099573 ENSMUSP00000136963 ENSMUSP00000002678 ENSMUSP00000104208 ENSMUSP00000035037 ENSMUSP00000061958 ENSMUSP00000025867 …	over	0.131919	0.522398	0.150943
Organismal Systems	Immune system	mmu04625	C-type lectin receptor signaling pathway	9	578	62	6012	0.015571	0.010313	ENSMUSP00000141132 ENSMUSP00000035065 ENSMUSP00000027015 ENSMUSP00000016672 ENSMUSP00000061958 ENSMUSP00000025263 ENSMUSP00000028881 ENSMUSP00000032239 ENSMUSP00000104548	ENSMUSP00000079991 ENSMUSP00000107829 ENSMUSP00000019514 ENSMUSP00000141132 ENSMUSP00000113852 ENSMUSP00000156154 ENSMUSP00000072859 ENSMUSP00000056774 ENSMUSP00000007959 ENSMUSP00000049584 ENSMUSP00000051619 ENSMUSP00000071040 ENSMUSP00000038150 ENSMUSP00000029445 ENSMUSP00000100872 ENSMUSP00000101588 ENSMUSP00000035065 ENSMUSP00000029812 ENSMUSP00000140546 ENSMUSP00000027015 ENSMUSP00000058757 …	over	0.13689	0.526925	0.145161
Organismal Systems	Endocrine system	mmu04919	Thyroid hormone signaling pathway	9	578	62	6012	0.015571	0.010313	ENSMUSP00000071486 ENSMUSP00000083077 ENSMUSP00000141132 ENSMUSP00000021028 ENSMUSP00000028288 ENSMUSP00000154338 ENSMUSP00000030747 ENSMUSP00000080538 ENSMUSP00000105736	ENSMUSP00000039657 ENSMUSP00000071486 ENSMUSP00000099922 ENSMUSP00000135935 ENSMUSP00000028499 ENSMUSP00000083077 ENSMUSP00000079991 ENSMUSP00000141132 ENSMUSP00000021142 ENSMUSP00000021614 ENSMUSP00000156154 ENSMUSP00000025912 ENSMUSP00000056774 ENSMUSP00000020522 ENSMUSP00000078741 ENSMUSP00000005606 ENSMUSP00000099657 ENSMUSP00000051619 ENSMUSP00000138788 ENSMUSP00000029445 ENSMUSP00000021028 …	over	0.13689	0.526925	0.145161
Organismal Systems	Nervous system	mmu04726	Serotonergic synapse	6	578	37	6012	0.010381	0.006154	ENSMUSP00000035065 ENSMUSP00000059977 ENSMUSP00000087485 ENSMUSP00000132180 ENSMUSP00000026211 ENSMUSP00000105736	ENSMUSP00000142326 ENSMUSP00000101241 ENSMUSP00000106656 ENSMUSP00000026013 ENSMUSP00000000001 ENSMUSP00000156154 ENSMUSP00000085179 ENSMUSP00000025912 ENSMUSP00000025541 ENSMUSP00000005606 ENSMUSP00000049584 ENSMUSP00000051619 ENSMUSP00000038150 ENSMUSP00000138788 ENSMUSP00000029445 ENSMUSP00000035065 ENSMUSP00000099573 ENSMUSP00000107339 ENSMUSP00000026572 ENSMUSP00000145346 ENSMUSP00000121127 …	over	0.139233	0.526925	0.162162
Organismal Systems	Digestive system	mmu04970	Salivary secretion	5	578	29	6012	0.008651	0.004824	ENSMUSP00000083077 ENSMUSP00000028938 ENSMUSP00000089800 ENSMUSP00000099617 ENSMUSP00000105736	ENSMUSP00000039657 ENSMUSP00000099922 ENSMUSP00000020107 ENSMUSP00000083077 ENSMUSP00000019514 ENSMUSP00000130594 ENSMUSP00000085179 ENSMUSP00000025912 ENSMUSP00000025541 ENSMUSP00000005606 ENSMUSP00000049584 ENSMUSP00000038150 ENSMUSP00000138788 ENSMUSP00000089801 ENSMUSP00000034983 ENSMUSP00000099573 ENSMUSP00000078972 ENSMUSP00000028938 ENSMUSP00000089800 ENSMUSP00000099583 ENSMUSP00000030669 …	over	0.140159	0.526925	0.172414
Organismal Systems	Digestive system	mmu04975	Fat digestion and absorption	3	578	14	6012	0.00519	0.002329	ENSMUSP00000034097 ENSMUSP00000080974 ENSMUSP00000064423	ENSMUSP00000034097 ENSMUSP00000034547 ENSMUSP00000030010 ENSMUSP00000078971 ENSMUSP00000080974 ENSMUSP00000148768 ENSMUSP00000007005 ENSMUSP00000036044 ENSMUSP00000048573 ENSMUSP00000065719 ENSMUSP00000023214 ENSMUSP00000069670 ENSMUSP00000064423 ENSMUSP00000028286	over	0.145132	0.538802	0.214286
Human Diseases	Infectious disease: viral	mmu05161	Hepatitis B	11	578	82	6012	0.019031	0.013639	ENSMUSP00000022894 ENSMUSP00000141132 ENSMUSP00000028259 ENSMUSP00000042433 ENSMUSP00000029623 ENSMUSP00000061958 ENSMUSP00000025263 ENSMUSP00000150354 ENSMUSP00000040307 ENSMUSP00000030747 ENSMUSP00000125731	ENSMUSP00000000804 ENSMUSP00000025649 ENSMUSP00000022622 ENSMUSP00000022894 ENSMUSP00000123605 ENSMUSP00000009036 ENSMUSP00000141132 ENSMUSP00000099842 ENSMUSP00000018470 ENSMUSP00000028259 ENSMUSP00000156154 ENSMUSP00000056774 ENSMUSP00000102106 ENSMUSP00000125291 ENSMUSP00000028817 ENSMUSP00000042433 ENSMUSP00000051619 ENSMUSP00000102980 ENSMUSP00000138788 ENSMUSP00000020316 ENSMUSP00000102981 …	over	0.160716	0.589291	0.134146
Human Diseases	Cancer: overview	mmu05205	Proteoglycans in cancer	12	578	92	6012	0.020761	0.015303	ENSMUSP00000071486 ENSMUSP00000054499 ENSMUSP00000004377 ENSMUSP00000021028 ENSMUSP00000029623 ENSMUSP00000061958 ENSMUSP00000025263 ENSMUSP00000031668 ENSMUSP00000044903 ENSMUSP00000017153 ENSMUSP00000058629 ENSMUSP00000007799	ENSMUSP00000109938 ENSMUSP00000128278 ENSMUSP00000071486 ENSMUSP00000113071 ENSMUSP00000052020 ENSMUSP00000028499 ENSMUSP00000128249 ENSMUSP00000021062 ENSMUSP00000079991 ENSMUSP00000054499 ENSMUSP00000087457 ENSMUSP00000152813 ENSMUSP00000063734 ENSMUSP00000004377 ENSMUSP00000096280 ENSMUSP00000110680 ENSMUSP00000023128 ENSMUSP00000005889 ENSMUSP00000039109 ENSMUSP00000156154 ENSMUSP00000069549 …	over	0.170141	0.616242	0.130435
Metabolism	Amino acid metabolism	mmu00400	Phenylalanine, tyrosine and tryptophan biosynthesis	1	578	2	6012	0.00173	0.000333	ENSMUSP00000034097	ENSMUSP00000034097 ENSMUSP00000026196	over	0.183053	0.63961	0.5
Metabolism	Glycan biosynthesis and metabolism	mmu00515	Mannose type O-glycan biosynthesis	1	578	2	6012	0.00173	0.000333	ENSMUSP00000030121	ENSMUSP00000030121 ENSMUSP00000112617	over	0.183053	0.63961	0.5
Metabolism	Metabolism of cofactors and vitamins	mmu00785	Lipoic acid metabolism	1	578	2	6012	0.00173	0.000333	ENSMUSP00000032967	ENSMUSP00000032967 ENSMUSP00000113228	over	0.183053	0.63961	0.5
Metabolism	Amino acid metabolism	mmu00330	Arginine and proline metabolism	5	578	32	6012	0.008651	0.005323	ENSMUSP00000034097 ENSMUSP00000001304 ENSMUSP00000018610 ENSMUSP00000006611 ENSMUSP00000099617	ENSMUSP00000031411 ENSMUSP00000025546 ENSMUSP00000034097 ENSMUSP00000028004 ENSMUSP00000001304 ENSMUSP00000026196 ENSMUSP00000040222 ENSMUSP00000026013 ENSMUSP00000027802 ENSMUSP00000021550 ENSMUSP00000067767 ENSMUSP00000025979 ENSMUSP00000043821 ENSMUSP00000041260 ENSMUSP00000081544 ENSMUSP00000028624 ENSMUSP00000009789 ENSMUSP00000101106 ENSMUSP00000018610 ENSMUSP00000049605 ENSMUSP00000108148 …	over	0.18888	0.652296	0.15625
Metabolism	Nucleotide metabolism	mmu00240	Pyrimidine metabolism	4	578	24	6012	0.00692	0.003992	ENSMUSP00000020969 ENSMUSP00000031793 ENSMUSP00000030154 ENSMUSP00000090360	ENSMUSP00000020969 ENSMUSP00000013773 ENSMUSP00000114273 ENSMUSP00000115934 ENSMUSP00000030491 ENSMUSP00000031793 ENSMUSP00000107920 ENSMUSP00000023510 ENSMUSP00000116285 ENSMUSP00000024978 ENSMUSP00000080767 ENSMUSP00000130898 ENSMUSP00000030381 ENSMUSP00000027503 ENSMUSP00000050398 ENSMUSP00000021082 ENSMUSP00000030154 ENSMUSP00000053616 ENSMUSP00000033283 ENSMUSP00000090360 ENSMUSP00000035053 …	over	0.194304	0.663314	0.166667
Metabolism	Lipid metabolism	mmu00140	Steroid hormone biosynthesis	2	578	9	6012	0.00346	0.001497	ENSMUSP00000026211 ENSMUSP00000031741	ENSMUSP00000058683 ENSMUSP00000028619 ENSMUSP00000130077 ENSMUSP00000031143 ENSMUSP00000027989 ENSMUSP00000043467 ENSMUSP00000026211 ENSMUSP00000102582 ENSMUSP00000031741	over	0.211865	0.715043	0.222222
Organismal Systems	Endocrine system	mmu04925	Aldosterone synthesis and secretion	4	578	25	6012	0.00692	0.004158	ENSMUSP00000083077 ENSMUSP00000081956 ENSMUSP00000034713 ENSMUSP00000105736	ENSMUSP00000039657 ENSMUSP00000099922 ENSMUSP00000020107 ENSMUSP00000083077 ENSMUSP00000019514 ENSMUSP00000043088 ENSMUSP00000130594 ENSMUSP00000085179 ENSMUSP00000025912 ENSMUSP00000025541 ENSMUSP00000005606 ENSMUSP00000049584 ENSMUSP00000038150 ENSMUSP00000138788 ENSMUSP00000034983 ENSMUSP00000099573 ENSMUSP00000129999 ENSMUSP00000043190 ENSMUSP00000081956 ENSMUSP00000099583 ENSMUSP00000034713 …	over	0.215022	0.717544	0.16
Cellular Processes	Cell growth and death	mmu04215	Apoptosis - multiple species	3	578	17	6012	0.00519	0.002828	ENSMUSP00000007803 ENSMUSP00000030747 ENSMUSP00000125731	ENSMUSP00000125291 ENSMUSP00000140546 ENSMUSP00000033093 ENSMUSP00000087073 ENSMUSP00000119369 ENSMUSP00000138333 ENSMUSP00000147767 ENSMUSP00000077757 ENSMUSP00000007803 ENSMUSP00000020634 ENSMUSP00000115045 ENSMUSP00000002152 ENSMUSP00000033394 ENSMUSP00000026062 ENSMUSP00000140049 ENSMUSP00000030747 ENSMUSP00000125731	over	0.220181	0.726596	0.176471
Environmental Information Processing	Signal transduction	mmu04152	AMPK signaling pathway	7	578	52	6012	0.012111	0.008649	ENSMUSP00000046101 ENSMUSP00000080974 ENSMUSP00000070726 ENSMUSP00000156500 ENSMUSP00000040307 ENSMUSP00000154338 ENSMUSP00000026220	ENSMUSP00000046101 ENSMUSP00000052872 ENSMUSP00000038555 ENSMUSP00000028238 ENSMUSP00000007708 ENSMUSP00000057664 ENSMUSP00000021001 ENSMUSP00000021614 ENSMUSP00000110021 ENSMUSP00000108987 ENSMUSP00000056774 ENSMUSP00000020608 ENSMUSP00000020522 ENSMUSP00000009774 ENSMUSP00000080974 ENSMUSP00000003121 ENSMUSP00000096549 ENSMUSP00000099510 ENSMUSP00000025835 ENSMUSP00000035037 ENSMUSP00000099490 …	over	0.229293	0.748351	0.134615
Environmental Information Processing	Signal transduction	mmu04630	JAK-STAT signaling pathway	5	578	35	6012	0.008651	0.005822	ENSMUSP00000004377 ENSMUSP00000141132 ENSMUSP00000150354 ENSMUSP00000007803 ENSMUSP00000023693	ENSMUSP00000004377 ENSMUSP00000141132 ENSMUSP00000099842 ENSMUSP00000056774 ENSMUSP00000102106 ENSMUSP00000102980 ENSMUSP00000102981 ENSMUSP00000100872 ENSMUSP00000099510 ENSMUSP00000058757 ENSMUSP00000035037 ENSMUSP00000089708 ENSMUSP00000026572 ENSMUSP00000044048 ENSMUSP00000101315 ENSMUSP00000023165 ENSMUSP00000120152 ENSMUSP00000150354 ENSMUSP00000066789 ENSMUSP00000108571 ENSMUSP00000036326 …	over	0.242657	0.771286	0.142857
Organismal Systems	Sensory system	mmu04750	Inflammatory mediator regulation of TRP channels	5	578	35	6012	0.008651	0.005822	ENSMUSP00000061958 ENSMUSP00000028881 ENSMUSP00000132180 ENSMUSP00000026211 ENSMUSP00000105736	ENSMUSP00000079991 ENSMUSP00000018651 ENSMUSP00000107829 ENSMUSP00000019514 ENSMUSP00000039109 ENSMUSP00000083474 ENSMUSP00000130594 ENSMUSP00000085179 ENSMUSP00000025912 ENSMUSP00000056774 ENSMUSP00000025541 ENSMUSP00000015100 ENSMUSP00000005606 ENSMUSP00000049584 ENSMUSP00000038150 ENSMUSP00000138788 ENSMUSP00000099573 ENSMUSP00000129999 ENSMUSP00000035037 ENSMUSP00000061958 ENSMUSP00000101315 …	over	0.242657	0.771286	0.142857
Cellular Processes	Cell growth and death	mmu04114	Oocyte meiosis	7	578	53	6012	0.012111	0.008816	ENSMUSP00000070993 ENSMUSP00000022894 ENSMUSP00000143631 ENSMUSP00000061958 ENSMUSP00000070726 ENSMUSP00000156500 ENSMUSP00000020543	ENSMUSP00000025930 ENSMUSP00000044645 ENSMUSP00000070993 ENSMUSP00000049977 ENSMUSP00000031697 ENSMUSP00000022894 ENSMUSP00000019514 ENSMUSP00000019109 ENSMUSP00000123605 ENSMUSP00000033671 ENSMUSP00000007708 ENSMUSP00000018470 ENSMUSP00000119328 ENSMUSP00000143631 ENSMUSP00000039109 ENSMUSP00000156154 ENSMUSP00000083474 ENSMUSP00000130594 ENSMUSP00000020608 ENSMUSP00000015100 ENSMUSP00000005606 …	over	0.244111	0.771286	0.132075
Metabolism	Carbohydrate metabolism	mmu00053	Ascorbate and aldarate metabolism	2	578	10	6012	0.00346	0.001663	ENSMUSP00000030455 ENSMUSP00000023832	ENSMUSP00000031411 ENSMUSP00000026613 ENSMUSP00000028004 ENSMUSP00000030455 ENSMUSP00000067767 ENSMUSP00000058683 ENSMUSP00000041260 ENSMUSP00000031103 ENSMUSP00000065089 ENSMUSP00000023832	over	0.248944	0.778276	0.2
Human Diseases	Immune disease	mmu05322	Systemic lupus erythematosus	5	578	36	6012	0.008651	0.005988	ENSMUSP00000041008 ENSMUSP00000025263 ENSMUSP00000046105 ENSMUSP00000087047 ENSMUSP00000028233	ENSMUSP00000066068 ENSMUSP00000021554 ENSMUSP00000016081 ENSMUSP00000024988 ENSMUSP00000088365 ENSMUSP00000085006 ENSMUSP00000106099 ENSMUSP00000078239 ENSMUSP00000088287 ENSMUSP00000115666 ENSMUSP00000020397 ENSMUSP00000029748 ENSMUSP00000017799 ENSMUSP00000151536 ENSMUSP00000124509 ENSMUSP00000051432 ENSMUSP00000074310 ENSMUSP00000027165 ENSMUSP00000041008 ENSMUSP00000025263 ENSMUSP00000036907 …	over	0.261429	0.808795	0.138889
Metabolism	Lipid metabolism	mmu00565	Ether lipid metabolism	3	578	19	6012	0.00519	0.00316	ENSMUSP00000024706 ENSMUSP00000118727 ENSMUSP00000064423	ENSMUSP00000021091 ENSMUSP00000067002 ENSMUSP00000041967 ENSMUSP00000113820 ENSMUSP00000024706 ENSMUSP00000049252 ENSMUSP00000020804 ENSMUSP00000070868 ENSMUSP00000118727 ENSMUSP00000005583 ENSMUSP00000104197 ENSMUSP00000022099 ENSMUSP00000037277 ENSMUSP00000101496 ENSMUSP00000065719 ENSMUSP00000069670 ENSMUSP00000064423 ENSMUSP00000127851 ENSMUSP00000119403	over	0.273748	0.838178	0.157895
Metabolism	Carbohydrate metabolism	mmu00620	Pyruvate metabolism	4	578	28	6012	0.00692	0.004657	ENSMUSP00000034834 ENSMUSP00000148107 ENSMUSP00000030455 ENSMUSP00000005964	ENSMUSP00000034834 ENSMUSP00000128770 ENSMUSP00000031411 ENSMUSP00000019323 ENSMUSP00000028004 ENSMUSP00000034547 ENSMUSP00000027810 ENSMUSP00000038555 ENSMUSP00000148107 ENSMUSP00000106481 ENSMUSP00000033662 ENSMUSP00000022268 ENSMUSP00000150509 ENSMUSP00000025439 ENSMUSP00000030455 ENSMUSP00000034567 ENSMUSP00000063825 ENSMUSP00000067767 ENSMUSP00000041260 ENSMUSP00000005964 ENSMUSP00000099490 …	over	0.280189	0.849143	0.142857
Environmental Information Processing	Signal transduction	mmu04066	HIF-1 signaling pathway	7	578	56	6012	0.012111	0.009315	ENSMUSP00000075513 ENSMUSP00000080302 ENSMUSP00000113942 ENSMUSP00000148107 ENSMUSP00000017534 ENSMUSP00000033585 ENSMUSP00000018610	ENSMUSP00000075513 ENSMUSP00000097282 ENSMUSP00000000642 ENSMUSP00000032934 ENSMUSP00000080302 ENSMUSP00000113942 ENSMUSP00000079991 ENSMUSP00000051215 ENSMUSP00000023486 ENSMUSP00000015484 ENSMUSP00000148107 ENSMUSP00000033662 ENSMUSP00000022268 ENSMUSP00000021614 ENSMUSP00000156154 ENSMUSP00000056774 ENSMUSP00000020522 ENSMUSP00000108264 ENSMUSP00000017534 ENSMUSP00000051619 ENSMUSP00000138788 …	over	0.290183	0.87055	0.125
Organismal Systems	Immune system	mmu04611	Platelet activation	8	578	66	6012	0.013841	0.010978	ENSMUSP00000071486 ENSMUSP00000021028 ENSMUSP00000061958 ENSMUSP00000059977 ENSMUSP00000031668 ENSMUSP00000141648 ENSMUSP00000039472 ENSMUSP00000105736	ENSMUSP00000030187 ENSMUSP00000071486 ENSMUSP00000079991 ENSMUSP00000087457 ENSMUSP00000037858 ENSMUSP00000152813 ENSMUSP00000096280 ENSMUSP00000142326 ENSMUSP00000100075 ENSMUSP00000020930 ENSMUSP00000113852 ENSMUSP00000119441 ENSMUSP00000039109 ENSMUSP00000000001 ENSMUSP00000156154 ENSMUSP00000069549 ENSMUSP00000083474 ENSMUSP00000130594 ENSMUSP00000085179 ENSMUSP00000025912 ENSMUSP00000032561 …	over	0.299118	0.881081	0.121212
Metabolism	Carbohydrate metabolism	mmu00030	Pentose phosphate pathway	3	578	20	6012	0.00519	0.003327	ENSMUSP00000004327 ENSMUSP00000017534 ENSMUSP00000023832	ENSMUSP00000032934 ENSMUSP00000022529 ENSMUSP00000081141 ENSMUSP00000004327 ENSMUSP00000147332 ENSMUSP00000061227 ENSMUSP00000049355 ENSMUSP00000021614 ENSMUSP00000084582 ENSMUSP00000020522 ENSMUSP00000017534 ENSMUSP00000030830 ENSMUSP00000131163 ENSMUSP00000033809 ENSMUSP00000026839 ENSMUSP00000034264 ENSMUSP00000155809 ENSMUSP00000064158 ENSMUSP00000084959 ENSMUSP00000023832	over	0.301041	0.881081	0.15
Metabolism	Metabolism of other amino acids	mmu00480	Glutathione metabolism	4	578	29	6012	0.00692	0.004824	ENSMUSP00000095316 ENSMUSP00000004327 ENSMUSP00000027149 ENSMUSP00000006611	ENSMUSP00000103015 ENSMUSP00000095316 ENSMUSP00000081141 ENSMUSP00000004327 ENSMUSP00000103007 ENSMUSP00000033992 ENSMUSP00000040222 ENSMUSP00000118874 ENSMUSP00000026050 ENSMUSP00000034905 ENSMUSP00000071636 ENSMUSP00000131163 ENSMUSP00000031897 ENSMUSP00000094863 ENSMUSP00000031982 ENSMUSP00000027149 ENSMUSP00000029769 ENSMUSP00000078630 ENSMUSP00000030296 ENSMUSP00000112923 ENSMUSP00000129565 …	over	0.302593	0.881081	0.137931
Organismal Systems	Circulatory system	mmu04260	Cardiac muscle contraction	5	578	39	6012	0.008651	0.006487	ENSMUSP00000087736 ENSMUSP00000083077 ENSMUSP00000103546 ENSMUSP00000115419 ENSMUSP00000080538	ENSMUSP00000039657 ENSMUSP00000099922 ENSMUSP00000135935 ENSMUSP00000087736 ENSMUSP00000083077 ENSMUSP00000033176 ENSMUSP00000029549 ENSMUSP00000026743 ENSMUSP00000109325 ENSMUSP00000003575 ENSMUSP00000021142 ENSMUSP00000077273 ENSMUSP00000109326 ENSMUSP00000034276 ENSMUSP00000034983 ENSMUSP00000075150 ENSMUSP00000045284 ENSMUSP00000103546 ENSMUSP00000021993 ENSMUSP00000053145 ENSMUSP00000023210 …	over	0.319433	0.914267	0.128205
Metabolism	Amino acid metabolism	mmu00340	Histidine metabolism	2	578	12	6012	0.00346	0.001996	ENSMUSP00000123336 ENSMUSP00000062747	ENSMUSP00000031411 ENSMUSP00000025546 ENSMUSP00000123336 ENSMUSP00000028004 ENSMUSP00000026013 ENSMUSP00000056276 ENSMUSP00000067767 ENSMUSP00000041260 ENSMUSP00000062747 ENSMUSP00000065089 ENSMUSP00000040550 ENSMUSP00000025632	over	0.323226	0.914267	0.166667
Metabolism	Carbohydrate metabolism	mmu00650	Butanoate metabolism	2	578	12	6012	0.00346	0.001996	ENSMUSP00000136944 ENSMUSP00000087192	ENSMUSP00000106318 ENSMUSP00000120976 ENSMUSP00000034547 ENSMUSP00000026538 ENSMUSP00000031524 ENSMUSP00000030432 ENSMUSP00000029610 ENSMUSP00000136944 ENSMUSP00000007005 ENSMUSP00000031445 ENSMUSP00000087192 ENSMUSP00000021370	over	0.323226	0.914267	0.166667
Human Diseases	Drug resistance: antineoplastic	mmu01523	Antifolate resistance	3	578	21	6012	0.00519	0.003493	ENSMUSP00000025263 ENSMUSP00000091692 ENSMUSP00000028881	ENSMUSP00000027384 ENSMUSP00000097743 ENSMUSP00000136343 ENSMUSP00000023684 ENSMUSP00000026470 ENSMUSP00000029812 ENSMUSP00000042186 ENSMUSP00000025867 ENSMUSP00000033939 ENSMUSP00000004330 ENSMUSP00000025263 ENSMUSP00000091692 ENSMUSP00000022218 ENSMUSP00000018744 ENSMUSP00000028881 ENSMUSP00000095843 ENSMUSP00000069774 ENSMUSP00000031822 ENSMUSP00000078158 ENSMUSP00000026217 ENSMUSP00000026208	over	0.328455	0.914775	0.142857
Metabolism	Glycan biosynthesis and metabolism	mmu00601	Glycosphingolipid biosynthesis - lacto and neolacto series	1	578	4	6012	0.00173	0.000665	ENSMUSP00000030121	ENSMUSP00000034537 ENSMUSP00000060247 ENSMUSP00000030121 ENSMUSP00000034260	over	0.332646	0.914775	0.25
Metabolism	Glycan biosynthesis and metabolism	mmu00603	Glycosphingolipid biosynthesis - globo and isoglobo series	1	578	4	6012	0.00173	0.000665	ENSMUSP00000154853	ENSMUSP00000026262 ENSMUSP00000022169 ENSMUSP00000023088 ENSMUSP00000154853	over	0.332646	0.914775	0.25
Organismal Systems	Immune system	mmu04062	Chemokine signaling pathway	10	578	88	6012	0.017301	0.014637	ENSMUSP00000141132 ENSMUSP00000031327 ENSMUSP00000019064 ENSMUSP00000039600 ENSMUSP00000087485 ENSMUSP00000021970 ENSMUSP00000074885 ENSMUSP00000019266 ENSMUSP00000001008 ENSMUSP00000105736	ENSMUSP00000090884 ENSMUSP00000079991 ENSMUSP00000152813 ENSMUSP00000022622 ENSMUSP00000142326 ENSMUSP00000100075 ENSMUSP00000072334 ENSMUSP00000107829 ENSMUSP00000101241 ENSMUSP00000141132 ENSMUSP00000003370 ENSMUSP00000106656 ENSMUSP00000005889 ENSMUSP00000016094 ENSMUSP00000037180 ENSMUSP00000000001 ENSMUSP00000156154 ENSMUSP00000069549 ENSMUSP00000130594 ENSMUSP00000025912 ENSMUSP00000056774 …	over	0.337511	0.915661	0.113636
Organismal Systems	Endocrine system	mmu04928	Parathyroid hormone synthesis, secretion and action	5	578	40	6012	0.008651	0.006653	ENSMUSP00000087119 ENSMUSP00000118727 ENSMUSP00000015394 ENSMUSP00000105736 ENSMUSP00000123743	ENSMUSP00000096280 ENSMUSP00000142326 ENSMUSP00000020930 ENSMUSP00000000001 ENSMUSP00000156154 ENSMUSP00000130594 ENSMUSP00000085179 ENSMUSP00000025912 ENSMUSP00000021077 ENSMUSP00000025541 ENSMUSP00000005606 ENSMUSP00000007959 ENSMUSP00000049584 ENSMUSP00000051619 ENSMUSP00000038150 ENSMUSP00000138788 ENSMUSP00000099573 ENSMUSP00000136963 ENSMUSP00000000153 ENSMUSP00000043190 ENSMUSP00000104208 …	over	0.339134	0.915661	0.125
Organismal Systems	Digestive system	mmu04972	Pancreatic secretion	4	578	31	6012	0.00692	0.005156	ENSMUSP00000083077 ENSMUSP00000022576 ENSMUSP00000031931 ENSMUSP00000105736	ENSMUSP00000039657 ENSMUSP00000099922 ENSMUSP00000020107 ENSMUSP00000135935 ENSMUSP00000083077 ENSMUSP00000021142 ENSMUSP00000130594 ENSMUSP00000085179 ENSMUSP00000025912 ENSMUSP00000129163 ENSMUSP00000025541 ENSMUSP00000007959 ENSMUSP00000049584 ENSMUSP00000066238 ENSMUSP00000038150 ENSMUSP00000138788 ENSMUSP00000088174 ENSMUSP00000003121 ENSMUSP00000098058 ENSMUSP00000034983 ENSMUSP00000078972 …	over	0.34788	0.930814	0.129032
Organismal Systems	Endocrine system	mmu04923	Regulation of lipolysis in adipocytes	3	578	22	6012	0.00519	0.003659	ENSMUSP00000035065 ENSMUSP00000029041 ENSMUSP00000059977	ENSMUSP00000142326 ENSMUSP00000000001 ENSMUSP00000130594 ENSMUSP00000085179 ENSMUSP00000056774 ENSMUSP00000005606 ENSMUSP00000035065 ENSMUSP00000099573 ENSMUSP00000029041 ENSMUSP00000035037 ENSMUSP00000109211 ENSMUSP00000088837 ENSMUSP00000059977 ENSMUSP00000101315 ENSMUSP00000103878 ENSMUSP00000073268 ENSMUSP00000103981 ENSMUSP00000123485 ENSMUSP00000001780 ENSMUSP00000127149 ENSMUSP00000119403 …	over	0.355847	0.937246	0.136364
Metabolism	Carbohydrate metabolism	mmu00040	Pentose and glucuronate interconversions	2	578	13	6012	0.00346	0.002162	ENSMUSP00000030455 ENSMUSP00000011526	ENSMUSP00000026613 ENSMUSP00000099939 ENSMUSP00000030455 ENSMUSP00000039114 ENSMUSP00000100045 ENSMUSP00000058683 ENSMUSP00000106180 ENSMUSP00000011526 ENSMUSP00000040244 ENSMUSP00000026144 ENSMUSP00000022517 ENSMUSP00000031103 ENSMUSP00000047254	over	0.359751	0.937246	0.153846
Metabolism	Amino acid metabolism	mmu00350	Tyrosine metabolism	2	578	13	6012	0.00346	0.002162	ENSMUSP00000034097 ENSMUSP00000005964	ENSMUSP00000034097 ENSMUSP00000026196 ENSMUSP00000026013 ENSMUSP00000056276 ENSMUSP00000005964 ENSMUSP00000032865 ENSMUSP00000130077 ENSMUSP00000041149 ENSMUSP00000053540 ENSMUSP00000040550 ENSMUSP00000055827 ENSMUSP00000125492 ENSMUSP00000102582	over	0.359751	0.937246	0.153846
Environmental Information Processing	Signal transduction	mmu04020	Calcium signaling pathway	6	578	51	6012	0.010381	0.008483	ENSMUSP00000018610 ENSMUSP00000070925 ENSMUSP00000049175 ENSMUSP00000099617 ENSMUSP00000026617 ENSMUSP00000105736	ENSMUSP00000020107 ENSMUSP00000135935 ENSMUSP00000079991 ENSMUSP00000020673 ENSMUSP00000134023 ENSMUSP00000016463 ENSMUSP00000022622 ENSMUSP00000034049 ENSMUSP00000019514 ENSMUSP00000009036 ENSMUSP00000021142 ENSMUSP00000077273 ENSMUSP00000031429 ENSMUSP00000130594 ENSMUSP00000098303 ENSMUSP00000085179 ENSMUSP00000025912 ENSMUSP00000025541 ENSMUSP00000005606 ENSMUSP00000049584 ENSMUSP00000071040 …	over	0.365874	0.944908	0.117647
Environmental Information Processing	Signal transduction	mmu04071	Sphingolipid signaling pathway	8	578	71	6012	0.013841	0.01181	ENSMUSP00000061958 ENSMUSP00000025263 ENSMUSP00000070726 ENSMUSP00000118727 ENSMUSP00000156500 ENSMUSP00000085293 ENSMUSP00000105736 ENSMUSP00000125731	ENSMUSP00000112975 ENSMUSP00000121203 ENSMUSP00000152813 ENSMUSP00000142326 ENSMUSP00000034000 ENSMUSP00000097743 ENSMUSP00000020930 ENSMUSP00000007708 ENSMUSP00000000001 ENSMUSP00000156154 ENSMUSP00000069549 ENSMUSP00000025912 ENSMUSP00000056774 ENSMUSP00000020608 ENSMUSP00000025541 ENSMUSP00000009774 ENSMUSP00000007959 ENSMUSP00000021424 ENSMUSP00000051619 ENSMUSP00000138788 ENSMUSP00000029445 …	over	0.373657	0.956106	0.112676
Human Diseases	Cancer: overview	mmu05230	Central carbon metabolism in cancer	5	578	42	6012	0.008651	0.006986	ENSMUSP00000034834 ENSMUSP00000095316 ENSMUSP00000004327 ENSMUSP00000011896 ENSMUSP00000148107	ENSMUSP00000034834 ENSMUSP00000128770 ENSMUSP00000097282 ENSMUSP00000000642 ENSMUSP00000095316 ENSMUSP00000051215 ENSMUSP00000004327 ENSMUSP00000011896 ENSMUSP00000103007 ENSMUSP00000148107 ENSMUSP00000033662 ENSMUSP00000110158 ENSMUSP00000022268 ENSMUSP00000150509 ENSMUSP00000021614 ENSMUSP00000110155 ENSMUSP00000156154 ENSMUSP00000056774 ENSMUSP00000020522 ENSMUSP00000051619 ENSMUSP00000029445 …	over	0.378748	0.956106	0.119048
Metabolism	Carbohydrate metabolism	mmu00640	Propanoate metabolism	3	578	23	6012	0.00519	0.003826	ENSMUSP00000148107 ENSMUSP00000045606 ENSMUSP00000139684	ENSMUSP00000120976 ENSMUSP00000038763 ENSMUSP00000022706 ENSMUSP00000148107 ENSMUSP00000026538 ENSMUSP00000106481 ENSMUSP00000031524 ENSMUSP00000035116 ENSMUSP00000082288 ENSMUSP00000144827 ENSMUSP00000063412 ENSMUSP00000065113 ENSMUSP00000130941 ENSMUSP00000063325 ENSMUSP00000045606 ENSMUSP00000071292 ENSMUSP00000099490 ENSMUSP00000000349 ENSMUSP00000028944 ENSMUSP00000047855 ENSMUSP00000139684 …	over	0.383086	0.956106	0.130435
Organismal Systems	Digestive system	mmu04971	Gastric acid secretion	3	578	23	6012	0.00519	0.003826	ENSMUSP00000071486 ENSMUSP00000083077 ENSMUSP00000105736	ENSMUSP00000039657 ENSMUSP00000071486 ENSMUSP00000099922 ENSMUSP00000083077 ENSMUSP00000063734 ENSMUSP00000142326 ENSMUSP00000019514 ENSMUSP00000000001 ENSMUSP00000130594 ENSMUSP00000085179 ENSMUSP00000025912 ENSMUSP00000025541 ENSMUSP00000005606 ENSMUSP00000049584 ENSMUSP00000038150 ENSMUSP00000138788 ENSMUSP00000034983 ENSMUSP00000099573 ENSMUSP00000129999 ENSMUSP00000078972 ENSMUSP00000099583 …	over	0.383086	0.956106	0.130435
Metabolism	Metabolism of cofactors and vitamins	mmu00790	Folate biosynthesis	2	578	14	6012	0.00346	0.002329	ENSMUSP00000087405 ENSMUSP00000034570	ENSMUSP00000039114 ENSMUSP00000100045 ENSMUSP00000145412 ENSMUSP00000015950 ENSMUSP00000040244 ENSMUSP00000049394 ENSMUSP00000133694 ENSMUSP00000063609 ENSMUSP00000115392 ENSMUSP00000022218 ENSMUSP00000106018 ENSMUSP00000095843 ENSMUSP00000087405 ENSMUSP00000034570	over	0.395521	0.962369	0.142857
Genetic Information Processing	Replication and repair	mmu03410	Base excision repair	2	578	14	6012	0.00346	0.002329	ENSMUSP00000082682 ENSMUSP00000136972	ENSMUSP00000027777 ENSMUSP00000082682 ENSMUSP00000028817 ENSMUSP00000042602 ENSMUSP00000117246 ENSMUSP00000124258 ENSMUSP00000039776 ENSMUSP00000030091 ENSMUSP00000108098 ENSMUSP00000033938 ENSMUSP00000021039 ENSMUSP00000136972 ENSMUSP00000121000 ENSMUSP00000099986	over	0.395521	0.962369	0.142857
Metabolism	Lipid metabolism	mmu00120	Primary bile acid biosynthesis	1	578	5	6012	0.00173	0.000832	ENSMUSP00000036245	ENSMUSP00000025385 ENSMUSP00000030340 ENSMUSP00000027356 ENSMUSP00000099383 ENSMUSP00000036245	over	0.396848	0.962369	0.2
Human Diseases	Cancer: specific types	mmu05212	Pancreatic cancer	5	578	43	6012	0.008651	0.007152	ENSMUSP00000141132 ENSMUSP00000126024 ENSMUSP00000118727 ENSMUSP00000007803 ENSMUSP00000030747	ENSMUSP00000141132 ENSMUSP00000099842 ENSMUSP00000033468 ENSMUSP00000156154 ENSMUSP00000056774 ENSMUSP00000054634 ENSMUSP00000051619 ENSMUSP00000098058 ENSMUSP00000029812 ENSMUSP00000099510 ENSMUSP00000033093 ENSMUSP00000002678 ENSMUSP00000035037 ENSMUSP00000025867 ENSMUSP00000126024 ENSMUSP00000107339 ENSMUSP00000033939 ENSMUSP00000004330 ENSMUSP00000036384 ENSMUSP00000004565 ENSMUSP00000101315 …	over	0.398557	0.962369	0.116279
Genetic Information Processing	Translation	mmu03010	Ribosome	12	578	113	6012	0.020761	0.018796	ENSMUSP00000034966 ENSMUSP00000092502 ENSMUSP00000080854 ENSMUSP00000151586 ENSMUSP00000115722 ENSMUSP00000041652 ENSMUSP00000079163 ENSMUSP00000080523 ENSMUSP00000079340 ENSMUSP00000117834 ENSMUSP00000069004 ENSMUSP00000003386	ENSMUSP00000080354 ENSMUSP00000034966 ENSMUSP00000032998 ENSMUSP00000029722 ENSMUSP00000099962 ENSMUSP00000092502 ENSMUSP00000031617 ENSMUSP00000033683 ENSMUSP00000071616 ENSMUSP00000083705 ENSMUSP00000080854 ENSMUSP00000104068 ENSMUSP00000117461 ENSMUSP00000006496 ENSMUSP00000035105 ENSMUSP00000099757 ENSMUSP00000109399 ENSMUSP00000048469 ENSMUSP00000032597 ENSMUSP00000008812 ENSMUSP00000081474 …	over	0.40327	0.965897	0.106195
Organismal Systems	Digestive system	mmu04979	Cholesterol metabolism	3	578	24	6012	0.00519	0.003992	ENSMUSP00000133302 ENSMUSP00000080974 ENSMUSP00000034713	ENSMUSP00000044004 ENSMUSP00000020673 ENSMUSP00000134023 ENSMUSP00000030986 ENSMUSP00000009036 ENSMUSP00000133302 ENSMUSP00000045864 ENSMUSP00000025279 ENSMUSP00000030010 ENSMUSP00000024897 ENSMUSP00000080974 ENSMUSP00000064699 ENSMUSP00000140721 ENSMUSP00000021668 ENSMUSP00000136967 ENSMUSP00000027356 ENSMUSP00000036749 ENSMUSP00000018311 ENSMUSP00000015712 ENSMUSP00000034713 ENSMUSP00000036044 …	over	0.410055	0.974291	0.125
Environmental Information Processing	Signal transduction	mmu04370	VEGF signaling pathway	4	578	34	6012	0.00692	0.005655	ENSMUSP00000035065 ENSMUSP00000016672 ENSMUSP00000061958 ENSMUSP00000030747	ENSMUSP00000079991 ENSMUSP00000156154 ENSMUSP00000056774 ENSMUSP00000054634 ENSMUSP00000051619 ENSMUSP00000071040 ENSMUSP00000138788 ENSMUSP00000029445 ENSMUSP00000098058 ENSMUSP00000035065 ENSMUSP00000016672 ENSMUSP00000035037 ENSMUSP00000061958 ENSMUSP00000107339 ENSMUSP00000026572 ENSMUSP00000148843 ENSMUSP00000125722 ENSMUSP00000036384 ENSMUSP00000035194 ENSMUSP00000101315 ENSMUSP00000070868 …	over	0.415783	0.97823	0.117647
		mmu01232	Nucleotide metabolism	5	578	44	6012	0.008651	0.007319	ENSMUSP00000020969 ENSMUSP00000031793 ENSMUSP00000059173 ENSMUSP00000090360 ENSMUSP00000035179	ENSMUSP00000024866 ENSMUSP00000043926 ENSMUSP00000025696 ENSMUSP00000020969 ENSMUSP00000029405 ENSMUSP00000030583 ENSMUSP00000114273 ENSMUSP00000030491 ENSMUSP00000031793 ENSMUSP00000017841 ENSMUSP00000002397 ENSMUSP00000149655 ENSMUSP00000016105 ENSMUSP00000026723 ENSMUSP00000107920 ENSMUSP00000023043 ENSMUSP00000047665 ENSMUSP00000079888 ENSMUSP00000116285 ENSMUSP00000024978 ENSMUSP00000006764 …	over	0.418301	0.97823	0.113636
Genetic Information Processing	Replication and repair	mmu03440	Homologous recombination	2	578	15	6012	0.00346	0.002495	ENSMUSP00000156132 ENSMUSP00000018985	ENSMUSP00000020649 ENSMUSP00000000767 ENSMUSP00000110427 ENSMUSP00000110160 ENSMUSP00000033544 ENSMUSP00000039776 ENSMUSP00000156132 ENSMUSP00000002473 ENSMUSP00000029879 ENSMUSP00000099621 ENSMUSP00000012627 ENSMUSP00000034405 ENSMUSP00000099986 ENSMUSP00000035164 ENSMUSP00000018985	over	0.430343	0.99079	0.133333
Organismal Systems	Endocrine system	mmu04927	Cortisol synthesis and secretion	2	578	15	6012	0.00346	0.002495	ENSMUSP00000034713 ENSMUSP00000105736	ENSMUSP00000045864 ENSMUSP00000130594 ENSMUSP00000085179 ENSMUSP00000025912 ENSMUSP00000025541 ENSMUSP00000005606 ENSMUSP00000049584 ENSMUSP00000038150 ENSMUSP00000099573 ENSMUSP00000043190 ENSMUSP00000099583 ENSMUSP00000034713 ENSMUSP00000001326 ENSMUSP00000058521 ENSMUSP00000105736	over	0.430343	0.99079	0.133333
Organismal Systems	Endocrine system	mmu04918	Thyroid hormone synthesis	3	578	25	6012	0.00519	0.004158	ENSMUSP00000083077 ENSMUSP00000031314 ENSMUSP00000105736	ENSMUSP00000039657 ENSMUSP00000099922 ENSMUSP00000028222 ENSMUSP00000020238 ENSMUSP00000076521 ENSMUSP00000020637 ENSMUSP00000083077 ENSMUSP00000033992 ENSMUSP00000130594 ENSMUSP00000085179 ENSMUSP00000025912 ENSMUSP00000025541 ENSMUSP00000005606 ENSMUSP00000049584 ENSMUSP00000038150 ENSMUSP00000138788 ENSMUSP00000034983 ENSMUSP00000099573 ENSMUSP00000031314 ENSMUSP00000099583 ENSMUSP00000081010 …	over	0.43665	0.997578	0.12
Metabolism	Amino acid metabolism	mmu00360	Phenylalanine metabolism	1	578	6	6012	0.00173	0.000998	ENSMUSP00000034097	ENSMUSP00000034097 ENSMUSP00000026196 ENSMUSP00000026013 ENSMUSP00000056276 ENSMUSP00000041149 ENSMUSP00000040550	over	0.454884	0.999893	0.166667
Metabolism	Glycan biosynthesis and metabolism	mmu00604	Glycosphingolipid biosynthesis - ganglio series	1	578	6	6012	0.00173	0.000998	ENSMUSP00000154853	ENSMUSP00000026262 ENSMUSP00000022169 ENSMUSP00000055803 ENSMUSP00000123986 ENSMUSP00000006914 ENSMUSP00000154853	over	0.454884	0.999893	0.166667
Genetic Information Processing	Folding, sorting and degradation	mmu04122	Sulfur relay system	1	578	6	6012	0.00173	0.000998	ENSMUSP00000096670	ENSMUSP00000029147 ENSMUSP00000043061 ENSMUSP00000055743 ENSMUSP00000096670 ENSMUSP00000088676 ENSMUSP00000112113	over	0.454884	0.999893	0.166667
Environmental Information Processing	Signal transduction	mmu04390	Hippo signaling pathway	5	578	46	6012	0.008651	0.007651	ENSMUSP00000071486 ENSMUSP00000070993 ENSMUSP00000022894 ENSMUSP00000143631 ENSMUSP00000058629	ENSMUSP00000071486 ENSMUSP00000000299 ENSMUSP00000070993 ENSMUSP00000022894 ENSMUSP00000019109 ENSMUSP00000123605 ENSMUSP00000007708 ENSMUSP00000018470 ENSMUSP00000143631 ENSMUSP00000039109 ENSMUSP00000083474 ENSMUSP00000020608 ENSMUSP00000015100 ENSMUSP00000009774 ENSMUSP00000064280 ENSMUSP00000002678 ENSMUSP00000002603 ENSMUSP00000018476 ENSMUSP00000086640 ENSMUSP00000060749 ENSMUSP00000110398 …	over	0.457412	0.999893	0.108696
Human Diseases	Cancer: specific types	mmu05221	Acute myeloid leukemia	4	578	36	6012	0.00692	0.005988	ENSMUSP00000020779 ENSMUSP00000056669 ENSMUSP00000025523 ENSMUSP00000001592	ENSMUSP00000068468 ENSMUSP00000020779 ENSMUSP00000156154 ENSMUSP00000056774 ENSMUSP00000056669 ENSMUSP00000102106 ENSMUSP00000025523 ENSMUSP00000051619 ENSMUSP00000102980 ENSMUSP00000102981 ENSMUSP00000029445 ENSMUSP00000029812 ENSMUSP00000099510 ENSMUSP00000029748 ENSMUSP00000035037 ENSMUSP00000025867 ENSMUSP00000001592 ENSMUSP00000107339 ENSMUSP00000033939 ENSMUSP00000026572 ENSMUSP00000004330 …	over	0.460209	0.999893	0.111111
Organismal Systems	Environmental adaptation	mmu04713	Circadian entrainment	3	578	26	6012	0.00519	0.004325	ENSMUSP00000087485 ENSMUSP00000099617 ENSMUSP00000105736	ENSMUSP00000142326 ENSMUSP00000019514 ENSMUSP00000101241 ENSMUSP00000106656 ENSMUSP00000000001 ENSMUSP00000156154 ENSMUSP00000130594 ENSMUSP00000085179 ENSMUSP00000025912 ENSMUSP00000025541 ENSMUSP00000005606 ENSMUSP00000051619 ENSMUSP00000038150 ENSMUSP00000138788 ENSMUSP00000099573 ENSMUSP00000129999 ENSMUSP00000145346 ENSMUSP00000121127 ENSMUSP00000125697 ENSMUSP00000099583 ENSMUSP00000087485 …	over	0.462782	0.999893	0.115385
Metabolism	Metabolism of terpenoids and polyketides	mmu00900	Terpenoid backbone biosynthesis	2	578	16	6012	0.00346	0.002661	ENSMUSP00000136944 ENSMUSP00000025823	ENSMUSP00000034547 ENSMUSP00000032065 ENSMUSP00000142770 ENSMUSP00000053900 ENSMUSP00000136944 ENSMUSP00000142393 ENSMUSP00000007005 ENSMUSP00000132780 ENSMUSP00000022176 ENSMUSP00000016138 ENSMUSP00000043390 ENSMUSP00000006692 ENSMUSP00000035498 ENSMUSP00000126603 ENSMUSP00000101511 ENSMUSP00000025823	over	0.464069	0.999893	0.125
Organismal Systems	Endocrine system	mmu04922	Glucagon signaling pathway	5	578	47	6012	0.008651	0.007818	ENSMUSP00000034834 ENSMUSP00000011896 ENSMUSP00000148107 ENSMUSP00000026617 ENSMUSP00000105736	ENSMUSP00000034834 ENSMUSP00000128770 ENSMUSP00000011896 ENSMUSP00000071231 ENSMUSP00000038555 ENSMUSP00000148107 ENSMUSP00000019514 ENSMUSP00000035743 ENSMUSP00000033662 ENSMUSP00000022268 ENSMUSP00000150509 ENSMUSP00000021614 ENSMUSP00000085179 ENSMUSP00000025912 ENSMUSP00000020522 ENSMUSP00000103474 ENSMUSP00000025541 ENSMUSP00000005606 ENSMUSP00000049584 ENSMUSP00000071040 ENSMUSP00000038150 …	over	0.476697	0.999893	0.106383
Cellular Processes	Cellular community - eukaryotes	mmu04540	Gap junction	4	578	37	6012	0.00692	0.006154	ENSMUSP00000060246 ENSMUSP00000001513 ENSMUSP00000064536 ENSMUSP00000105736	ENSMUSP00000076777 ENSMUSP00000051033 ENSMUSP00000078429 ENSMUSP00000001566 ENSMUSP00000142326 ENSMUSP00000060246 ENSMUSP00000042342 ENSMUSP00000000001 ENSMUSP00000156154 ENSMUSP00000130594 ENSMUSP00000085179 ENSMUSP00000025912 ENSMUSP00000102106 ENSMUSP00000025541 ENSMUSP00000005606 ENSMUSP00000049584 ENSMUSP00000051619 ENSMUSP00000038150 ENSMUSP00000138788 ENSMUSP00000029445 ENSMUSP00000099573 …	over	0.481989	0.999893	0.108108
Environmental Information Processing	Signal transduction	mmu04350	TGF-beta signaling pathway	3	578	27	6012	0.00519	0.004491	ENSMUSP00000025263 ENSMUSP00000044903 ENSMUSP00000015003	ENSMUSP00000031697 ENSMUSP00000007708 ENSMUSP00000156154 ENSMUSP00000069549 ENSMUSP00000028633 ENSMUSP00000020608 ENSMUSP00000009774 ENSMUSP00000007959 ENSMUSP00000051619 ENSMUSP00000002678 ENSMUSP00000038744 ENSMUSP00000025263 ENSMUSP00000023165 ENSMUSP00000025393 ENSMUSP00000007757 ENSMUSP00000066789 ENSMUSP00000044903 ENSMUSP00000001326 ENSMUSP00000022217 ENSMUSP00000015003 ENSMUSP00000065798 …	over	0.488372	0.999893	0.111111
Human Diseases	Cancer: overview	mmu05235	PD-L1 expression and PD-1 checkpoint pathway in cancer	5	578	48	6012	0.008651	0.007984	ENSMUSP00000004377 ENSMUSP00000141132 ENSMUSP00000029623 ENSMUSP00000061958 ENSMUSP00000016640	ENSMUSP00000004377 ENSMUSP00000141132 ENSMUSP00000099842 ENSMUSP00000156154 ENSMUSP00000056774 ENSMUSP00000051619 ENSMUSP00000071040 ENSMUSP00000029445 ENSMUSP00000029812 ENSMUSP00000029623 ENSMUSP00000096829 ENSMUSP00000099510 ENSMUSP00000058757 ENSMUSP00000035037 ENSMUSP00000061958 ENSMUSP00000025867 ENSMUSP00000107339 ENSMUSP00000033939 ENSMUSP00000026572 ENSMUSP00000055919 ENSMUSP00000004330 …	over	0.495752	0.999893	0.104167
Metabolism	Amino acid metabolism	mmu00260	Glycine, serine and threonine metabolism	2	578	17	6012	0.00346	0.002828	ENSMUSP00000011896 ENSMUSP00000065542	ENSMUSP00000011896 ENSMUSP00000064755 ENSMUSP00000106481 ENSMUSP00000026013 ENSMUSP00000026470 ENSMUSP00000025542 ENSMUSP00000028624 ENSMUSP00000006544 ENSMUSP00000033230 ENSMUSP00000018744 ENSMUSP00000065089 ENSMUSP00000040550 ENSMUSP00000031399 ENSMUSP00000037131 ENSMUSP00000108143 ENSMUSP00000020359 ENSMUSP00000065542	over	0.496587	0.999893	0.117647
Organismal Systems	Digestive system	mmu04978	Mineral absorption	2	578	17	6012	0.00346	0.002828	ENSMUSP00000083077 ENSMUSP00000034214	ENSMUSP00000039657 ENSMUSP00000099922 ENSMUSP00000020107 ENSMUSP00000083077 ENSMUSP00000058840 ENSMUSP00000108264 ENSMUSP00000004172 ENSMUSP00000034983 ENSMUSP00000005548 ENSMUSP00000104485 ENSMUSP00000126373 ENSMUSP00000042410 ENSMUSP00000081574 ENSMUSP00000023774 ENSMUSP00000148443 ENSMUSP00000034214 ENSMUSP00000037443	over	0.496587	0.999893	0.117647
Cellular Processes	Cellular community - eukaryotes	mmu04520	Adherens junction	4	578	38	6012	0.00692	0.006321	ENSMUSP00000071486 ENSMUSP00000004377 ENSMUSP00000074898 ENSMUSP00000040307	ENSMUSP00000128278 ENSMUSP00000071486 ENSMUSP00000066068 ENSMUSP00000021554 ENSMUSP00000022369 ENSMUSP00000004377 ENSMUSP00000129592 ENSMUSP00000029053 ENSMUSP00000156154 ENSMUSP00000054634 ENSMUSP00000007959 ENSMUSP00000051619 ENSMUSP00000098058 ENSMUSP00000119153 ENSMUSP00000096829 ENSMUSP00000088837 ENSMUSP00000081263 ENSMUSP00000055919 ENSMUSP00000033505 ENSMUSP00000107323 ENSMUSP00000057707 …	over	0.503414	0.999893	0.105263
Metabolism	Metabolism of cofactors and vitamins	mmu00740	Riboflavin metabolism	1	578	7	6012	0.00173	0.001164	ENSMUSP00000043092	ENSMUSP00000114273 ENSMUSP00000043092 ENSMUSP00000051366 ENSMUSP00000106509 ENSMUSP00000073686 ENSMUSP00000065425 ENSMUSP00000025617	over	0.507345	0.999893	0.142857
Genetic Information Processing	Replication and repair	mmu03460	Fanconi anemia pathway	1	578	7	6012	0.00173	0.001164	ENSMUSP00000156132	ENSMUSP00000000767 ENSMUSP00000156132 ENSMUSP00000042509 ENSMUSP00000099621 ENSMUSP00000012627 ENSMUSP00000019986 ENSMUSP00000023206	over	0.507345	0.999893	0.142857
Organismal Systems	Endocrine system	mmu04917	Prolactin signaling pathway	3	578	29	6012	0.00519	0.004824	ENSMUSP00000141132 ENSMUSP00000061958 ENSMUSP00000104548	ENSMUSP00000141132 ENSMUSP00000156154 ENSMUSP00000056774 ENSMUSP00000102106 ENSMUSP00000051619 ENSMUSP00000102980 ENSMUSP00000102981 ENSMUSP00000029445 ENSMUSP00000029812 ENSMUSP00000035037 ENSMUSP00000061958 ENSMUSP00000025867 ENSMUSP00000107339 ENSMUSP00000026572 ENSMUSP00000110398 ENSMUSP00000101315 ENSMUSP00000120152 ENSMUSP00000005066 ENSMUSP00000105155 ENSMUSP00000081745 ENSMUSP00000108571 …	over	0.537673	0.999893	0.103448
Human Diseases	Cancer: overview	mmu05206	MicroRNAs in cancer	7	578	72	6012	0.012111	0.011976	ENSMUSP00000035065 ENSMUSP00000021028 ENSMUSP00000126024 ENSMUSP00000055714 ENSMUSP00000028288 ENSMUSP00000044903 ENSMUSP00000028071	ENSMUSP00000028062 ENSMUSP00000128249 ENSMUSP00000079991 ENSMUSP00000063734 ENSMUSP00000090245 ENSMUSP00000009058 ENSMUSP00000135647 ENSMUSP00000097743 ENSMUSP00000023128 ENSMUSP00000004202 ENSMUSP00000109325 ENSMUSP00000110158 ENSMUSP00000041204 ENSMUSP00000020991 ENSMUSP00000109326 ENSMUSP00000110155 ENSMUSP00000156154 ENSMUSP00000069549 ENSMUSP00000056774 ENSMUSP00000102106 ENSMUSP00000078741 …	over	0.546474	0.999893	0.0972222
Organismal Systems	Nervous system	mmu04728	Dopaminergic synapse	5	578	51	6012	0.008651	0.008483	ENSMUSP00000061958 ENSMUSP00000070726 ENSMUSP00000156500 ENSMUSP00000087485 ENSMUSP00000105736	ENSMUSP00000025083 ENSMUSP00000142326 ENSMUSP00000019514 ENSMUSP00000101241 ENSMUSP00000007708 ENSMUSP00000106656 ENSMUSP00000026013 ENSMUSP00000039109 ENSMUSP00000000001 ENSMUSP00000083474 ENSMUSP00000085179 ENSMUSP00000025912 ENSMUSP00000020608 ENSMUSP00000025541 ENSMUSP00000015100 ENSMUSP00000005606 ENSMUSP00000009774 ENSMUSP00000049584 ENSMUSP00000071040 ENSMUSP00000038150 ENSMUSP00000138788 …	over	0.551204	0.999893	0.0980392
Metabolism	Metabolism of cofactors and vitamins	mmu00130	Ubiquinone and other terpenoid-quinone biosynthesis	1	578	8	6012	0.00173	0.001331	ENSMUSP00000095695	ENSMUSP00000048001 ENSMUSP00000105905 ENSMUSP00000029909 ENSMUSP00000033074 ENSMUSP00000059139 ENSMUSP00000095695 ENSMUSP00000003947 ENSMUSP00000070109	over	0.554764	0.999893	0.125
Organismal Systems	Sensory system	mmu04742	Taste transduction	1	578	8	6012	0.00173	0.001331	ENSMUSP00000105736	ENSMUSP00000025912 ENSMUSP00000005606 ENSMUSP00000038150 ENSMUSP00000099573 ENSMUSP00000099583 ENSMUSP00000122685 ENSMUSP00000054233 ENSMUSP00000105736	over	0.554764	0.999893	0.125
Human Diseases	Immune disease	mmu05340	Primary immunodeficiency	1	578	8	6012	0.00173	0.001331	ENSMUSP00000128401	ENSMUSP00000138350 ENSMUSP00000128401 ENSMUSP00000033617 ENSMUSP00000017841 ENSMUSP00000025197 ENSMUSP00000017799 ENSMUSP00000004330 ENSMUSP00000105640	over	0.554764	0.999893	0.125
Human Diseases	Endocrine and metabolic disease	mmu04930	Type II diabetes mellitus	2	578	19	6012	0.00346	0.00316	ENSMUSP00000034834 ENSMUSP00000025263	ENSMUSP00000034834 ENSMUSP00000128770 ENSMUSP00000097282 ENSMUSP00000000642 ENSMUSP00000051215 ENSMUSP00000107829 ENSMUSP00000150509 ENSMUSP00000156154 ENSMUSP00000056774 ENSMUSP00000051619 ENSMUSP00000099510 ENSMUSP00000035037 ENSMUSP00000088837 ENSMUSP00000033939 ENSMUSP00000025263 ENSMUSP00000101315 ENSMUSP00000103878 ENSMUSP00000020634 ENSMUSP00000067085	over	0.557709	0.999893	0.105263
Organismal Systems	Digestive system	mmu04973	Carbohydrate digestion and absorption	2	578	19	6012	0.00346	0.00316	ENSMUSP00000083077 ENSMUSP00000105736	ENSMUSP00000039657 ENSMUSP00000099922 ENSMUSP00000097282 ENSMUSP00000000642 ENSMUSP00000083077 ENSMUSP00000051215 ENSMUSP00000025912 ENSMUSP00000056774 ENSMUSP00000138788 ENSMUSP00000034983 ENSMUSP00000035037 ENSMUSP00000101315 ENSMUSP00000099583 ENSMUSP00000103878 ENSMUSP00000103981 ENSMUSP00000001780 ENSMUSP00000150753 ENSMUSP00000070368 ENSMUSP00000105736	over	0.557709	0.999893	0.105263
Organismal Systems	Endocrine system	mmu04912	GnRH signaling pathway	4	578	41	6012	0.00692	0.00682	ENSMUSP00000061958 ENSMUSP00000087119 ENSMUSP00000118727 ENSMUSP00000105736	ENSMUSP00000022622 ENSMUSP00000107829 ENSMUSP00000019514 ENSMUSP00000156154 ENSMUSP00000130594 ENSMUSP00000085179 ENSMUSP00000025912 ENSMUSP00000054634 ENSMUSP00000102106 ENSMUSP00000025541 ENSMUSP00000005606 ENSMUSP00000049584 ENSMUSP00000051619 ENSMUSP00000038150 ENSMUSP00000138788 ENSMUSP00000029445 ENSMUSP00000099573 ENSMUSP00000129999 ENSMUSP00000043190 ENSMUSP00000061958 ENSMUSP00000087119 …	over	0.56515	0.999893	0.097561
Metabolism	Xenobiotics biodegradation and metabolism	mmu00980	Metabolism of xenobiotics by cytochrome P450	2	578	20	6012	0.00346	0.003327	ENSMUSP00000011526 ENSMUSP00000005964	ENSMUSP00000118874 ENSMUSP00000056276 ENSMUSP00000047551 ENSMUSP00000026050 ENSMUSP00000058683 ENSMUSP00000011526 ENSMUSP00000049394 ENSMUSP00000005964 ENSMUSP00000031897 ENSMUSP00000031982 ENSMUSP00000047712 ENSMUSP00000026148 ENSMUSP00000073459 ENSMUSP00000112923 ENSMUSP00000129565 ENSMUSP00000041175 ENSMUSP00000001715 ENSMUSP00000028005 ENSMUSP00000004134 ENSMUSP00000029489	over	0.586228	0.999893	0.1
Organismal Systems	Endocrine system	mmu04911	Insulin secretion	2	578	20	6012	0.00346	0.003327	ENSMUSP00000083077 ENSMUSP00000105736	ENSMUSP00000039657 ENSMUSP00000099922 ENSMUSP00000083077 ENSMUSP00000130594 ENSMUSP00000085179 ENSMUSP00000025912 ENSMUSP00000025541 ENSMUSP00000005606 ENSMUSP00000038150 ENSMUSP00000138788 ENSMUSP00000034983 ENSMUSP00000099573 ENSMUSP00000129999 ENSMUSP00000043190 ENSMUSP00000099583 ENSMUSP00000112611 ENSMUSP00000058521 ENSMUSP00000030398 ENSMUSP00000146012 ENSMUSP00000105736	over	0.586228	0.999893	0.1
Organismal Systems	Excretory system	mmu04964	Proximal tubule bicarbonate reclamation	1	578	9	6012	0.00173	0.001497	ENSMUSP00000083077	ENSMUSP00000039657 ENSMUSP00000099922 ENSMUSP00000022322 ENSMUSP00000083077 ENSMUSP00000038555 ENSMUSP00000110158 ENSMUSP00000110155 ENSMUSP00000034983 ENSMUSP00000026899	over	0.597627	0.999893	0.111111
Metabolism	Glycan biosynthesis and metabolism	mmu00532	Glycosaminoglycan biosynthesis - chondroitin sulfate / dermatan sulfate	1	578	10	6012	0.00173	0.001663	ENSMUSP00000085633	ENSMUSP00000040074 ENSMUSP00000039819 ENSMUSP00000112052 ENSMUSP00000068532 ENSMUSP00000032892 ENSMUSP00000093962 ENSMUSP00000057521 ENSMUSP00000099579 ENSMUSP00000085633 ENSMUSP00000041663	over	0.636369	0.999893	0.1
Environmental Information Processing	Signal transduction	mmu04392	Hippo signaling pathway - multiple species	1	578	10	6012	0.00173	0.001663	ENSMUSP00000048267	ENSMUSP00000018476 ENSMUSP00000146055 ENSMUSP00000108855 ENSMUSP00000048267 ENSMUSP00000028814 ENSMUSP00000105536 ENSMUSP00000150888 ENSMUSP00000026269 ENSMUSP00000113252 ENSMUSP00000006311	over	0.636369	0.999893	0.1
Human Diseases	Cancer: specific types	mmu05217	Basal cell carcinoma	1	578	10	6012	0.00173	0.001663	ENSMUSP00000058629	ENSMUSP00000033093 ENSMUSP00000110398 ENSMUSP00000077757 ENSMUSP00000058629 ENSMUSP00000073974 ENSMUSP00000007130 ENSMUSP00000109884 ENSMUSP00000100996 ENSMUSP00000064333 ENSMUSP00000078337	over	0.636369	0.999893	0.1
Human Diseases	Infectious disease: viral	mmu05170	Human immunodeficiency virus 1 infection	11	578	117	6012	0.019031	0.019461	ENSMUSP00000128401 ENSMUSP00000029623 ENSMUSP00000061958 ENSMUSP00000025263 ENSMUSP00000099534 ENSMUSP00000007803 ENSMUSP00000087485 ENSMUSP00000040307 ENSMUSP00000124599 ENSMUSP00000030747 ENSMUSP00000125731	ENSMUSP00000028683 ENSMUSP00000009234 ENSMUSP00000003912 ENSMUSP00000079991 ENSMUSP00000025649 ENSMUSP00000022622 ENSMUSP00000142326 ENSMUSP00000059717 ENSMUSP00000031697 ENSMUSP00000147514 ENSMUSP00000019514 ENSMUSP00000101241 ENSMUSP00000003117 ENSMUSP00000106656 ENSMUSP00000025161 ENSMUSP00000000001 ENSMUSP00000156154 ENSMUSP00000034171 ENSMUSP00000134004 ENSMUSP00000110771 ENSMUSP00000128401 …	under	0.57822	0.999893	0.0940171
Cellular Processes	Cell growth and death	mmu04110	Cell cycle	5	578	53	6012	0.008651	0.008816	ENSMUSP00000070993 ENSMUSP00000022894 ENSMUSP00000143631 ENSMUSP00000126024 ENSMUSP00000015003	ENSMUSP00000025930 ENSMUSP00000044645 ENSMUSP00000070993 ENSMUSP00000031697 ENSMUSP00000022894 ENSMUSP00000019109 ENSMUSP00000123605 ENSMUSP00000018470 ENSMUSP00000143631 ENSMUSP00000110725 ENSMUSP00000027601 ENSMUSP00000028817 ENSMUSP00000099657 ENSMUSP00000061923 ENSMUSP00000031534 ENSMUSP00000081547 ENSMUSP00000126135 ENSMUSP00000059192 ENSMUSP00000002678 ENSMUSP00000116205 ENSMUSP00000126024 …	under	0.586475	0.999893	0.0943396
Organismal Systems	Immune system	mmu04650	Natural killer cell mediated cytotoxicity	5	578	53	6012	0.008651	0.008816	ENSMUSP00000004377 ENSMUSP00000083587 ENSMUSP00000025263 ENSMUSP00000023693 ENSMUSP00000125731	ENSMUSP00000000299 ENSMUSP00000079991 ENSMUSP00000004377 ENSMUSP00000022622 ENSMUSP00000101913 ENSMUSP00000005889 ENSMUSP00000113852 ENSMUSP00000083587 ENSMUSP00000156154 ENSMUSP00000134004 ENSMUSP00000056774 ENSMUSP00000102106 ENSMUSP00000051619 ENSMUSP00000071040 ENSMUSP00000138788 ENSMUSP00000029445 ENSMUSP00000098058 ENSMUSP00000064241 ENSMUSP00000058757 ENSMUSP00000035037 ENSMUSP00000107339 …	under	0.586475	0.999893	0.0943396
Metabolism	Global and overview maps	mmu01240	Biosynthesis of cofactors	8	578	86	6012	0.013841	0.014305	ENSMUSP00000030455 ENSMUSP00000020969 ENSMUSP00000032967 ENSMUSP00000023832 ENSMUSP00000001806 ENSMUSP00000087405 ENSMUSP00000095695 ENSMUSP00000034570	ENSMUSP00000031411 ENSMUSP00000045841 ENSMUSP00000026613 ENSMUSP00000112870 ENSMUSP00000106481 ENSMUSP00000021443 ENSMUSP00000033098 ENSMUSP00000025696 ENSMUSP00000099939 ENSMUSP00000030455 ENSMUSP00000020969 ENSMUSP00000029147 ENSMUSP00000030583 ENSMUSP00000026470 ENSMUSP00000025542 ENSMUSP00000013773 ENSMUSP00000067767 ENSMUSP00000038540 ENSMUSP00000145412 ENSMUSP00000115934 ENSMUSP00000030491 …	under	0.59368	0.999893	0.0930233
Genetic Information Processing	Translation	mmu03015	mRNA surveillance pathway	6	578	65	6012	0.010381	0.010812	ENSMUSP00000070726 ENSMUSP00000025264 ENSMUSP00000156500 ENSMUSP00000129789 ENSMUSP00000124450 ENSMUSP00000017384	ENSMUSP00000001809 ENSMUSP00000075089 ENSMUSP00000026667 ENSMUSP00000079070 ENSMUSP00000007708 ENSMUSP00000039109 ENSMUSP00000083474 ENSMUSP00000025218 ENSMUSP00000155308 ENSMUSP00000020608 ENSMUSP00000078940 ENSMUSP00000070682 ENSMUSP00000030014 ENSMUSP00000010241 ENSMUSP00000066806 ENSMUSP00000015100 ENSMUSP00000101858 ENSMUSP00000009774 ENSMUSP00000047797 ENSMUSP00000081142 ENSMUSP00000107109 …	under	0.60423	0.999893	0.0923077
Genetic Information Processing	Translation	mmu03013	Nucleocytoplasmic transport	8	578	87	6012	0.013841	0.014471	ENSMUSP00000042457 ENSMUSP00000055714 ENSMUSP00000084257 ENSMUSP00000134416 ENSMUSP00000129789 ENSMUSP00000124450 ENSMUSP00000099879 ENSMUSP00000017384	ENSMUSP00000117616 ENSMUSP00000042457 ENSMUSP00000003310 ENSMUSP00000032898 ENSMUSP00000075089 ENSMUSP00000144126 ENSMUSP00000048084 ENSMUSP00000026667 ENSMUSP00000001479 ENSMUSP00000099933 ENSMUSP00000148115 ENSMUSP00000054556 ENSMUSP00000126849 ENSMUSP00000128819 ENSMUSP00000078878 ENSMUSP00000059289 ENSMUSP00000129504 ENSMUSP00000002790 ENSMUSP00000036093 ENSMUSP00000063590 ENSMUSP00000070682 …	under	0.607121	0.999893	0.091954
Environmental Information Processing	Signal transduction	mmu04330	Notch signaling pathway	2	578	21	6012	0.00346	0.003493	ENSMUSP00000080601 ENSMUSP00000028288	ENSMUSP00000078741 ENSMUSP00000099657 ENSMUSP00000099087 ENSMUSP00000078682 ENSMUSP00000080601 ENSMUSP00000119303 ENSMUSP00000130294 ENSMUSP00000003550 ENSMUSP00000019911 ENSMUSP00000048363 ENSMUSP00000023165 ENSMUSP00000136010 ENSMUSP00000028288 ENSMUSP00000021428 ENSMUSP00000066789 ENSMUSP00000040694 ENSMUSP00000058846 ENSMUSP00000130359 ENSMUSP00000107033 ENSMUSP00000146675 ENSMUSP00000136255	under	0.613362	0.999893	0.0952381
Human Diseases	Cancer: overview	mmu05200	Pathways in cancer	16	578	174	6012	0.027682	0.028942	ENSMUSP00000054499 ENSMUSP00000141132 ENSMUSP00000025523 ENSMUSP00000035065 ENSMUSP00000001592 ENSMUSP00000126024 ENSMUSP00000018610 ENSMUSP00000118727 ENSMUSP00000028288 ENSMUSP00000007803 ENSMUSP00000023693 ENSMUSP00000087485 ENSMUSP00000058629 ENSMUSP00000030747 ENSMUSP00000105736 ENSMUSP00000125731	ENSMUSP00000117616 ENSMUSP00000024739 ENSMUSP00000020238 ENSMUSP00000091921 ENSMUSP00000028499 ENSMUSP00000079991 ENSMUSP00000054499 ENSMUSP00000087457 ENSMUSP00000152813 ENSMUSP00000029549 ENSMUSP00000096280 ENSMUSP00000142326 ENSMUSP00000027810 ENSMUSP00000031697 ENSMUSP00000019514 ENSMUSP00000101241 ENSMUSP00000141132 ENSMUSP00000099842 ENSMUSP00000020930 ENSMUSP00000106656 ENSMUSP00000118874 …	under	0.61417	0.999893	0.091954
Cellular Processes	Cell growth and death	mmu04218	Cellular senescence	7	578	77	6012	0.012111	0.012808	ENSMUSP00000016672 ENSMUSP00000061958 ENSMUSP00000126024 ENSMUSP00000015981 ENSMUSP00000028882 ENSMUSP00000015003 ENSMUSP00000154338	ENSMUSP00000020673 ENSMUSP00000134023 ENSMUSP00000016463 ENSMUSP00000025891 ENSMUSP00000034049 ENSMUSP00000019514 ENSMUSP00000009036 ENSMUSP00000068895 ENSMUSP00000020649 ENSMUSP00000039109 ENSMUSP00000029382 ENSMUSP00000156154 ENSMUSP00000083474 ENSMUSP00000134004 ENSMUSP00000056774 ENSMUSP00000015100 ENSMUSP00000049584 ENSMUSP00000051619 ENSMUSP00000071040 ENSMUSP00000038150 ENSMUSP00000029445 …	under	0.619619	0.999893	0.0909091
Cellular Processes	Cellular community - eukaryotes	mmu04550	Signaling pathways regulating pluripotency of stem cells	3	578	33	6012	0.00519	0.005489	ENSMUSP00000061958 ENSMUSP00000058629 ENSMUSP00000028071	ENSMUSP00000099842 ENSMUSP00000156154 ENSMUSP00000056774 ENSMUSP00000102106 ENSMUSP00000051619 ENSMUSP00000029445 ENSMUSP00000035037 ENSMUSP00000061958 ENSMUSP00000107339 ENSMUSP00000026572 ENSMUSP00000110398 ENSMUSP00000101315 ENSMUSP00000120152 ENSMUSP00000005066 ENSMUSP00000025393 ENSMUSP00000108571 ENSMUSP00000103878 ENSMUSP00000121111 ENSMUSP00000103981 ENSMUSP00000058629 ENSMUSP00000001780 …	under	0.627537	0.999893	0.0909091
Genetic Information Processing	Transcription	mmu03022	Basal transcription factors	2	578	22	6012	0.00346	0.003659	ENSMUSP00000138108 ENSMUSP00000038610	ENSMUSP00000049625 ENSMUSP00000029938 ENSMUSP00000002733 ENSMUSP00000021018 ENSMUSP00000054380 ENSMUSP00000086312 ENSMUSP00000001565 ENSMUSP00000113501 ENSMUSP00000090726 ENSMUSP00000131136 ENSMUSP00000025241 ENSMUSP00000031333 ENSMUSP00000021523 ENSMUSP00000109123 ENSMUSP00000048016 ENSMUSP00000138108 ENSMUSP00000038610 ENSMUSP00000026027 ENSMUSP00000098895 ENSMUSP00000118105 ENSMUSP00000126284 …	under	0.639113	0.999893	0.0909091
Organismal Systems	Digestive system	mmu04976	Bile secretion	2	578	22	6012	0.00346	0.003659	ENSMUSP00000083077 ENSMUSP00000034713	ENSMUSP00000039657 ENSMUSP00000099922 ENSMUSP00000083077 ENSMUSP00000009058 ENSMUSP00000136343 ENSMUSP00000041204 ENSMUSP00000047551 ENSMUSP00000045864 ENSMUSP00000130594 ENSMUSP00000085179 ENSMUSP00000005606 ENSMUSP00000034983 ENSMUSP00000099573 ENSMUSP00000058683 ENSMUSP00000042186 ENSMUSP00000078972 ENSMUSP00000022176 ENSMUSP00000034713 ENSMUSP00000030669 ENSMUSP00000030398 ENSMUSP00000031822 …	under	0.639113	0.999893	0.0909091
Human Diseases	Substance dependence	mmu05032	Morphine addiction	2	578	22	6012	0.00346	0.003659	ENSMUSP00000081956 ENSMUSP00000087485	ENSMUSP00000142326 ENSMUSP00000101241 ENSMUSP00000106656 ENSMUSP00000000001 ENSMUSP00000130594 ENSMUSP00000085179 ENSMUSP00000005606 ENSMUSP00000138788 ENSMUSP00000099573 ENSMUSP00000136963 ENSMUSP00000086114 ENSMUSP00000104208 ENSMUSP00000145346 ENSMUSP00000121127 ENSMUSP00000125697 ENSMUSP00000081956 ENSMUSP00000087485 ENSMUSP00000001115 ENSMUSP00000103340 ENSMUSP00000003313 ENSMUSP00000114945 …	under	0.639113	0.999893	0.0909091
Human Diseases	Endocrine and metabolic disease	mmu04934	Cushing syndrome	4	578	45	6012	0.00692	0.007485	ENSMUSP00000126024 ENSMUSP00000034713 ENSMUSP00000058629 ENSMUSP00000105736	ENSMUSP00000142326 ENSMUSP00000027810 ENSMUSP00000045864 ENSMUSP00000000001 ENSMUSP00000156154 ENSMUSP00000130594 ENSMUSP00000085179 ENSMUSP00000025912 ENSMUSP00000025541 ENSMUSP00000005606 ENSMUSP00000049584 ENSMUSP00000051619 ENSMUSP00000066238 ENSMUSP00000038150 ENSMUSP00000088174 ENSMUSP00000099573 ENSMUSP00000129999 ENSMUSP00000043190 ENSMUSP00000126024 ENSMUSP00000113807 ENSMUSP00000110398 …	under	0.640427	0.999893	0.0888889
Organismal Systems	Nervous system	mmu04724	Glutamatergic synapse	3	578	34	6012	0.00519	0.005655	ENSMUSP00000118727 ENSMUSP00000087485 ENSMUSP00000105736	ENSMUSP00000142326 ENSMUSP00000101241 ENSMUSP00000110158 ENSMUSP00000106656 ENSMUSP00000000001 ENSMUSP00000110155 ENSMUSP00000156154 ENSMUSP00000130594 ENSMUSP00000085179 ENSMUSP00000025912 ENSMUSP00000025541 ENSMUSP00000005606 ENSMUSP00000049584 ENSMUSP00000051619 ENSMUSP00000071040 ENSMUSP00000038150 ENSMUSP00000138788 ENSMUSP00000099573 ENSMUSP00000086114 ENSMUSP00000145346 ENSMUSP00000121127 …	under	0.64803	0.999893	0.0882353
Metabolism	Glycan biosynthesis and metabolism	mmu00512	Mucin type O-glycan biosynthesis	1	578	11	6012	0.00173	0.00183	ENSMUSP00000154853	ENSMUSP00000034021 ENSMUSP00000034458 ENSMUSP00000000430 ENSMUSP00000125315 ENSMUSP00000104844 ENSMUSP00000123848 ENSMUSP00000047931 ENSMUSP00000154853 ENSMUSP00000036240 ENSMUSP00000034260 ENSMUSP00000059224	under	0.671387	0.999893	0.0909091
Metabolism	Metabolism of cofactors and vitamins	mmu00770	Pantothenate and CoA biosynthesis	1	578	11	6012	0.00173	0.00183	ENSMUSP00000001806	ENSMUSP00000031411 ENSMUSP00000033098 ENSMUSP00000114273 ENSMUSP00000067767 ENSMUSP00000041260 ENSMUSP00000023805 ENSMUSP00000001806 ENSMUSP00000043562 ENSMUSP00000082856 ENSMUSP00000040599 ENSMUSP00000030385	under	0.671387	0.999893	0.0909091
Environmental Information Processing	Signal transduction	mmu04310	Wnt signaling pathway	4	578	47	6012	0.00692	0.007818	ENSMUSP00000058629 ENSMUSP00000040307 ENSMUSP00000000769 ENSMUSP00000105736	ENSMUSP00000152813 ENSMUSP00000031697 ENSMUSP00000032165 ENSMUSP00000025912 ENSMUSP00000142184 ENSMUSP00000085549 ENSMUSP00000005606 ENSMUSP00000007959 ENSMUSP00000071040 ENSMUSP00000138788 ENSMUSP00000098058 ENSMUSP00000099573 ENSMUSP00000096829 ENSMUSP00000078682 ENSMUSP00000129999 ENSMUSP00000130294 ENSMUSP00000055919 ENSMUSP00000110398 ENSMUSP00000038744 ENSMUSP00000048363 ENSMUSP00000125722 …	under	0.674708	0.999893	0.0851064
Genetic Information Processing	Folding, sorting and degradation	mmu04130	SNARE interactions in vesicular transport	2	578	24	6012	0.00346	0.003992	ENSMUSP00000116376 ENSMUSP00000044877	ENSMUSP00000112138 ENSMUSP00000029476 ENSMUSP00000020174 ENSMUSP00000033075 ENSMUSP00000031378 ENSMUSP00000002818 ENSMUSP00000057462 ENSMUSP00000069529 ENSMUSP00000134854 ENSMUSP00000023449 ENSMUSP00000153629 ENSMUSP00000059501 ENSMUSP00000015725 ENSMUSP00000021329 ENSMUSP00000010536 ENSMUSP00000027743 ENSMUSP00000021285 ENSMUSP00000039543 ENSMUSP00000116376 ENSMUSP00000046243 ENSMUSP00000112611 …	under	0.686537	0.999893	0.0833333
Environmental Information Processing	Signal transduction	mmu04015	Rap1 signaling pathway	6	578	71	6012	0.010381	0.01181	ENSMUSP00000071486 ENSMUSP00000025523 ENSMUSP00000021028 ENSMUSP00000061958 ENSMUSP00000044903 ENSMUSP00000105736	ENSMUSP00000030187 ENSMUSP00000071486 ENSMUSP00000000299 ENSMUSP00000068468 ENSMUSP00000087457 ENSMUSP00000142326 ENSMUSP00000019514 ENSMUSP00000101913 ENSMUSP00000018437 ENSMUSP00000005889 ENSMUSP00000119441 ENSMUSP00000000001 ENSMUSP00000156154 ENSMUSP00000047387 ENSMUSP00000021689 ENSMUSP00000130594 ENSMUSP00000085179 ENSMUSP00000025912 ENSMUSP00000032561 ENSMUSP00000056774 ENSMUSP00000054634 …	under	0.690368	0.999893	0.084507
Human Diseases	Drug resistance: antineoplastic	mmu01524	Platinum drug resistance	3	578	37	6012	0.00519	0.006154	ENSMUSP00000007803 ENSMUSP00000030747 ENSMUSP00000125731	ENSMUSP00000017629 ENSMUSP00000118874 ENSMUSP00000026050 ENSMUSP00000156154 ENSMUSP00000058840 ENSMUSP00000056774 ENSMUSP00000125291 ENSMUSP00000051619 ENSMUSP00000140546 ENSMUSP00000033093 ENSMUSP00000035037 ENSMUSP00000101315 ENSMUSP00000147767 ENSMUSP00000112923 ENSMUSP00000129565 ENSMUSP00000077757 ENSMUSP00000001715 ENSMUSP00000103878 ENSMUSP00000007803 ENSMUSP00000081574 ENSMUSP00000005503 …	under	0.704624	0.999893	0.0810811
Organismal Systems	Excretory system	mmu04961	Endocrine and other factor-regulated calcium reabsorption	2	578	25	6012	0.00346	0.004158	ENSMUSP00000083077 ENSMUSP00000105736	ENSMUSP00000050220 ENSMUSP00000039657 ENSMUSP00000099922 ENSMUSP00000020107 ENSMUSP00000127842 ENSMUSP00000018875 ENSMUSP00000003038 ENSMUSP00000083077 ENSMUSP00000072199 ENSMUSP00000007216 ENSMUSP00000085179 ENSMUSP00000025912 ENSMUSP00000129163 ENSMUSP00000025541 ENSMUSP00000005606 ENSMUSP00000138788 ENSMUSP00000034983 ENSMUSP00000099573 ENSMUSP00000103478 ENSMUSP00000089198 ENSMUSP00000083281 …	under	0.708266	0.999893	0.08
Environmental Information Processing	Signal transduction	mmu04010	MAPK signaling pathway	9	578	107	6012	0.015571	0.017798	ENSMUSP00000056669 ENSMUSP00000025523 ENSMUSP00000016672 ENSMUSP00000061958 ENSMUSP00000025263 ENSMUSP00000126961 ENSMUSP00000028881 ENSMUSP00000028882 ENSMUSP00000040307	ENSMUSP00000109938 ENSMUSP00000015800 ENSMUSP00000052020 ENSMUSP00000033671 ENSMUSP00000107609 ENSMUSP00000119328 ENSMUSP00000156154 ENSMUSP00000072859 ENSMUSP00000054634 ENSMUSP00000056669 ENSMUSP00000079306 ENSMUSP00000102106 ENSMUSP00000005606 ENSMUSP00000025523 ENSMUSP00000051619 ENSMUSP00000071040 ENSMUSP00000066238 ENSMUSP00000023467 ENSMUSP00000138788 ENSMUSP00000088174 ENSMUSP00000029445 …	under	0.71303	0.999893	0.0841121
Organismal Systems	Immune system	mmu04660	T cell receptor signaling pathway	4	578	50	6012	0.00692	0.008317	ENSMUSP00000004377 ENSMUSP00000061958 ENSMUSP00000025263 ENSMUSP00000040307	ENSMUSP00000138350 ENSMUSP00000004377 ENSMUSP00000005889 ENSMUSP00000156154 ENSMUSP00000056774 ENSMUSP00000054634 ENSMUSP00000102106 ENSMUSP00000007959 ENSMUSP00000051619 ENSMUSP00000071040 ENSMUSP00000023467 ENSMUSP00000064280 ENSMUSP00000029445 ENSMUSP00000029812 ENSMUSP00000035037 ENSMUSP00000061958 ENSMUSP00000025867 ENSMUSP00000107339 ENSMUSP00000033939 ENSMUSP00000026572 ENSMUSP00000004330 …	under	0.721758	0.999893	0.08
Organismal Systems	Endocrine system	mmu04935	Growth hormone synthesis, secretion and action	4	578	50	6012	0.00692	0.008317	ENSMUSP00000141132 ENSMUSP00000061958 ENSMUSP00000064680 ENSMUSP00000105736	ENSMUSP00000079991 ENSMUSP00000142326 ENSMUSP00000141132 ENSMUSP00000000001 ENSMUSP00000156154 ENSMUSP00000130594 ENSMUSP00000085179 ENSMUSP00000025912 ENSMUSP00000056774 ENSMUSP00000102106 ENSMUSP00000025541 ENSMUSP00000005606 ENSMUSP00000049584 ENSMUSP00000051619 ENSMUSP00000038150 ENSMUSP00000102980 ENSMUSP00000138788 ENSMUSP00000102981 ENSMUSP00000029445 ENSMUSP00000017920 ENSMUSP00000099573 …	under	0.721758	0.999893	0.08
Cellular Processes	Cellular community - eukaryotes	mmu04510	Focal adhesion	7	578	85	6012	0.012111	0.014138	ENSMUSP00000071486 ENSMUSP00000054499 ENSMUSP00000021028 ENSMUSP00000031668 ENSMUSP00000001147 ENSMUSP00000044903 ENSMUSP00000007799	ENSMUSP00000109938 ENSMUSP00000030187 ENSMUSP00000071486 ENSMUSP00000066068 ENSMUSP00000021554 ENSMUSP00000052020 ENSMUSP00000022369 ENSMUSP00000028499 ENSMUSP00000054499 ENSMUSP00000087457 ENSMUSP00000152813 ENSMUSP00000025337 ENSMUSP00000110680 ENSMUSP00000023128 ENSMUSP00000068895 ENSMUSP00000005889 ENSMUSP00000099718 ENSMUSP00000119441 ENSMUSP00000039109 ENSMUSP00000156154 ENSMUSP00000069549 …	under	0.721823	0.999893	0.0823529
Human Diseases	Cancer: specific types	mmu05224	Breast cancer	3	578	38	6012	0.00519	0.006321	ENSMUSP00000126024 ENSMUSP00000028288 ENSMUSP00000058629	ENSMUSP00000156154 ENSMUSP00000072859 ENSMUSP00000056774 ENSMUSP00000102106 ENSMUSP00000078741 ENSMUSP00000051619 ENSMUSP00000029445 ENSMUSP00000099510 ENSMUSP00000033093 ENSMUSP00000035037 ENSMUSP00000126024 ENSMUSP00000107339 ENSMUSP00000026572 ENSMUSP00000110398 ENSMUSP00000131687 ENSMUSP00000101315 ENSMUSP00000005066 ENSMUSP00000028288 ENSMUSP00000001155 ENSMUSP00000077757 ENSMUSP00000108571 …	under	0.72187	0.999893	0.0789474
Metabolism	Carbohydrate metabolism	mmu00020	Citrate cycle (TCA cycle)	2	578	26	6012	0.00346	0.004325	ENSMUSP00000095316 ENSMUSP00000000175	ENSMUSP00000023116 ENSMUSP00000022062 ENSMUSP00000003461 ENSMUSP00000019323 ENSMUSP00000095316 ENSMUSP00000103007 ENSMUSP00000022706 ENSMUSP00000027810 ENSMUSP00000038555 ENSMUSP00000106481 ENSMUSP00000033662 ENSMUSP00000100038 ENSMUSP00000022268 ENSMUSP00000010007 ENSMUSP00000007131 ENSMUSP00000005826 ENSMUSP00000034567 ENSMUSP00000144827 ENSMUSP00000063825 ENSMUSP00000028892 ENSMUSP00000065113 …	under	0.728723	0.999893	0.0769231
Genetic Information Processing	Replication and repair	mmu03030	DNA replication	2	578	26	6012	0.00346	0.004325	ENSMUSP00000136972 ENSMUSP00000105358	ENSMUSP00000027601 ENSMUSP00000028817 ENSMUSP00000061923 ENSMUSP00000126135 ENSMUSP00000059192 ENSMUSP00000117246 ENSMUSP00000023867 ENSMUSP00000000767 ENSMUSP00000110427 ENSMUSP00000023353 ENSMUSP00000000505 ENSMUSP00000039776 ENSMUSP00000030091 ENSMUSP00000022499 ENSMUSP00000110995 ENSMUSP00000083652 ENSMUSP00000136556 ENSMUSP00000027312 ENSMUSP00000039621 ENSMUSP00000099621 ENSMUSP00000012627 …	under	0.728723	0.999893	0.0769231
Metabolism	Amino acid metabolism	mmu00280	Valine, leucine and isoleucine degradation	3	578	39	6012	0.00519	0.006487	ENSMUSP00000045606 ENSMUSP00000136944 ENSMUSP00000139684	ENSMUSP00000031411 ENSMUSP00000106318 ENSMUSP00000042351 ENSMUSP00000120976 ENSMUSP00000028004 ENSMUSP00000038763 ENSMUSP00000034547 ENSMUSP00000026841 ENSMUSP00000026538 ENSMUSP00000106481 ENSMUSP00000031524 ENSMUSP00000037348 ENSMUSP00000033098 ENSMUSP00000030432 ENSMUSP00000035116 ENSMUSP00000029259 ENSMUSP00000028807 ENSMUSP00000054370 ENSMUSP00000082288 ENSMUSP00000108236 ENSMUSP00000022148 …	under	0.738323	0.999893	0.0769231
Organismal Systems	Immune system	mmu04664	Fc epsilon RI signaling pathway	3	578	39	6012	0.00519	0.006487	ENSMUSP00000061958 ENSMUSP00000025263 ENSMUSP00000071130	ENSMUSP00000079991 ENSMUSP00000127941 ENSMUSP00000100075 ENSMUSP00000005889 ENSMUSP00000113852 ENSMUSP00000156154 ENSMUSP00000056774 ENSMUSP00000102106 ENSMUSP00000033617 ENSMUSP00000051619 ENSMUSP00000029445 ENSMUSP00000098058 ENSMUSP00000035037 ENSMUSP00000061958 ENSMUSP00000107339 ENSMUSP00000026572 ENSMUSP00000036270 ENSMUSP00000057707 ENSMUSP00000036384 ENSMUSP00000025263 ENSMUSP00000101315 …	under	0.738323	0.999893	0.0769231
Metabolism	Glycan biosynthesis and metabolism	mmu00513	Various types of N-glycan biosynthesis	2	578	27	6012	0.00346	0.004491	ENSMUSP00000057905 ENSMUSP00000030121	ENSMUSP00000032143 ENSMUSP00000026262 ENSMUSP00000022169 ENSMUSP00000083928 ENSMUSP00000113116 ENSMUSP00000112081 ENSMUSP00000030538 ENSMUSP00000036996 ENSMUSP00000035010 ENSMUSP00000151568 ENSMUSP00000043580 ENSMUSP00000080484 ENSMUSP00000057905 ENSMUSP00000095949 ENSMUSP00000022781 ENSMUSP00000050979 ENSMUSP00000097770 ENSMUSP00000136327 ENSMUSP00000072382 ENSMUSP00000008907 ENSMUSP00000034561 …	under	0.747951	0.999893	0.0740741
Cellular Processes	Transport and catabolism	mmu04146	Peroxisome	4	578	52	6012	0.00692	0.008649	ENSMUSP00000095316 ENSMUSP00000018610 ENSMUSP00000028650 ENSMUSP00000113304	ENSMUSP00000095316 ENSMUSP00000024866 ENSMUSP00000042351 ENSMUSP00000103007 ENSMUSP00000028610 ENSMUSP00000114159 ENSMUSP00000034046 ENSMUSP00000030454 ENSMUSP00000108528 ENSMUSP00000025385 ENSMUSP00000046585 ENSMUSP00000030432 ENSMUSP00000041967 ENSMUSP00000030340 ENSMUSP00000025904 ENSMUSP00000063412 ENSMUSP00000007012 ENSMUSP00000023707 ENSMUSP00000099919 ENSMUSP00000066092 ENSMUSP00000063325 …	under	0.750211	0.999893	0.0769231
Genetic Information Processing	Translation	mmu00970	Aminoacyl-tRNA biosynthesis	3	578	40	6012	0.00519	0.006653	ENSMUSP00000099685 ENSMUSP00000147212 ENSMUSP00000102393	ENSMUSP00000045841 ENSMUSP00000084572 ENSMUSP00000027921 ENSMUSP00000132082 ENSMUSP00000034441 ENSMUSP00000101669 ENSMUSP00000018992 ENSMUSP00000027602 ENSMUSP00000095197 ENSMUSP00000006838 ENSMUSP00000003572 ENSMUSP00000010899 ENSMUSP00000090808 ENSMUSP00000124625 ENSMUSP00000036710 ENSMUSP00000001416 ENSMUSP00000099685 ENSMUSP00000129828 ENSMUSP00000022849 ENSMUSP00000130666 ENSMUSP00000117231 …	under	0.753995	0.999893	0.075
Metabolism	Nucleotide metabolism	mmu00230	Purine metabolism	4	578	53	6012	0.00692	0.008816	ENSMUSP00000081956 ENSMUSP00000059173 ENSMUSP00000030154 ENSMUSP00000035179	ENSMUSP00000024866 ENSMUSP00000027384 ENSMUSP00000061227 ENSMUSP00000043926 ENSMUSP00000025696 ENSMUSP00000023684 ENSMUSP00000029405 ENSMUSP00000084582 ENSMUSP00000030583 ENSMUSP00000130594 ENSMUSP00000114273 ENSMUSP00000031160 ENSMUSP00000021282 ENSMUSP00000017841 ENSMUSP00000002397 ENSMUSP00000149655 ENSMUSP00000016105 ENSMUSP00000026723 ENSMUSP00000023043 ENSMUSP00000047665 ENSMUSP00000079888 …	under	0.763577	0.999893	0.0754717
Metabolism	Lipid metabolism	mmu00561	Glycerolipid metabolism	2	578	28	6012	0.00346	0.004657	ENSMUSP00000030455 ENSMUSP00000064423	ENSMUSP00000031411 ENSMUSP00000028004 ENSMUSP00000030455 ENSMUSP00000039114 ENSMUSP00000100045 ENSMUSP00000067767 ENSMUSP00000041260 ENSMUSP00000109611 ENSMUSP00000106934 ENSMUSP00000040244 ENSMUSP00000031977 ENSMUSP00000109211 ENSMUSP00000001240 ENSMUSP00000024594 ENSMUSP00000068690 ENSMUSP00000117025 ENSMUSP00000065089 ENSMUSP00000015712 ENSMUSP00000048573 ENSMUSP00000065719 ENSMUSP00000023214 …	under	0.765997	0.999893	0.0714286
Genetic Information Processing	Folding, sorting and degradation	mmu03050	Proteasome	3	578	41	6012	0.00519	0.00682	ENSMUSP00000134735 ENSMUSP00000019470 ENSMUSP00000133499	ENSMUSP00000071054 ENSMUSP00000027432 ENSMUSP00000007212 ENSMUSP00000021049 ENSMUSP00000021063 ENSMUSP00000017365 ENSMUSP00000021412 ENSMUSP00000134735 ENSMUSP00000034848 ENSMUSP00000029082 ENSMUSP00000133571 ENSMUSP00000033008 ENSMUSP00000022380 ENSMUSP00000022256 ENSMUSP00000021595 ENSMUSP00000025196 ENSMUSP00000125548 ENSMUSP00000026560 ENSMUSP00000030642 ENSMUSP00000014913 ENSMUSP00000088057 …	under	0.768904	0.999893	0.0731707
Human Diseases	Infectious disease: bacterial	mmu05135	Yersinia infection	7	578	90	6012	0.012111	0.01497	ENSMUSP00000071486 ENSMUSP00000054499 ENSMUSP00000027015 ENSMUSP00000061958 ENSMUSP00000025263 ENSMUSP00000028881 ENSMUSP00000040307	ENSMUSP00000071486 ENSMUSP00000054499 ENSMUSP00000000137 ENSMUSP00000109451 ENSMUSP00000087457 ENSMUSP00000152813 ENSMUSP00000137503 ENSMUSP00000096280 ENSMUSP00000022622 ENSMUSP00000072334 ENSMUSP00000076933 ENSMUSP00000023128 ENSMUSP00000033671 ENSMUSP00000005889 ENSMUSP00000119328 ENSMUSP00000143438 ENSMUSP00000099718 ENSMUSP00000156154 ENSMUSP00000069549 ENSMUSP00000116235 ENSMUSP00000081531 …	under	0.775352	0.999893	0.0777778
Organismal Systems	Endocrine system	mmu04921	Oxytocin signaling pathway	4	578	54	6012	0.00692	0.008982	ENSMUSP00000071486 ENSMUSP00000046101 ENSMUSP00000035065 ENSMUSP00000105736	ENSMUSP00000071486 ENSMUSP00000046101 ENSMUSP00000152813 ENSMUSP00000142326 ENSMUSP00000019514 ENSMUSP00000151915 ENSMUSP00000039109 ENSMUSP00000000001 ENSMUSP00000156154 ENSMUSP00000069549 ENSMUSP00000083474 ENSMUSP00000130594 ENSMUSP00000085179 ENSMUSP00000025912 ENSMUSP00000025541 ENSMUSP00000015100 ENSMUSP00000005606 ENSMUSP00000007959 ENSMUSP00000049584 ENSMUSP00000051619 ENSMUSP00000071040 …	under	0.776381	0.999893	0.0740741
Metabolism	Metabolism of cofactors and vitamins	mmu00760	Nicotinate and nicotinamide metabolism	1	578	15	6012	0.00173	0.002495	ENSMUSP00000020886	ENSMUSP00000096753 ENSMUSP00000020886 ENSMUSP00000043926 ENSMUSP00000114273 ENSMUSP00000152796 ENSMUSP00000072732 ENSMUSP00000130898 ENSMUSP00000021082 ENSMUSP00000147716 ENSMUSP00000079093 ENSMUSP00000030939 ENSMUSP00000030845 ENSMUSP00000032912 ENSMUSP00000023237 ENSMUSP00000025065	under	0.78087	0.999893	0.0666667
Genetic Information Processing	Replication and repair	mmu03430	Mismatch repair	1	578	15	6012	0.00173	0.002495	ENSMUSP00000136972	ENSMUSP00000028817 ENSMUSP00000023867 ENSMUSP00000000767 ENSMUSP00000110427 ENSMUSP00000039776 ENSMUSP00000005503 ENSMUSP00000110995 ENSMUSP00000083652 ENSMUSP00000024967 ENSMUSP00000039621 ENSMUSP00000099621 ENSMUSP00000012627 ENSMUSP00000136972 ENSMUSP00000099986 ENSMUSP00000145385	under	0.78087	0.999893	0.0666667
Organismal Systems	Excretory system	mmu04960	Aldosterone-regulated sodium reabsorption	1	578	15	6012	0.00173	0.002495	ENSMUSP00000083077	ENSMUSP00000039657 ENSMUSP00000099922 ENSMUSP00000083077 ENSMUSP00000156154 ENSMUSP00000056774 ENSMUSP00000051619 ENSMUSP00000138788 ENSMUSP00000034983 ENSMUSP00000035037 ENSMUSP00000088837 ENSMUSP00000107339 ENSMUSP00000050374 ENSMUSP00000101315 ENSMUSP00000103878 ENSMUSP00000099991	under	0.78087	0.999893	0.0666667
Organismal Systems	Excretory system	mmu04966	Collecting duct acid secretion	1	578	15	6012	0.00173	0.002495	ENSMUSP00000024932	ENSMUSP00000110314 ENSMUSP00000006435 ENSMUSP00000122474 ENSMUSP00000099399 ENSMUSP00000022904 ENSMUSP00000019354 ENSMUSP00000013304 ENSMUSP00000029900 ENSMUSP00000017900 ENSMUSP00000021536 ENSMUSP00000039737 ENSMUSP00000024932 ENSMUSP00000004396 ENSMUSP00000048770 ENSMUSP00000069482	under	0.78087	0.999893	0.0666667
Metabolism	Lipid metabolism	mmu00071	Fatty acid degradation	2	578	29	6012	0.00346	0.004824	ENSMUSP00000005964 ENSMUSP00000003907	ENSMUSP00000031411 ENSMUSP00000042351 ENSMUSP00000120976 ENSMUSP00000027153 ENSMUSP00000099634 ENSMUSP00000028004 ENSMUSP00000034547 ENSMUSP00000026841 ENSMUSP00000034046 ENSMUSP00000026538 ENSMUSP00000031524 ENSMUSP00000037348 ENSMUSP00000108528 ENSMUSP00000046585 ENSMUSP00000063412 ENSMUSP00000067767 ENSMUSP00000072483 ENSMUSP00000029610 ENSMUSP00000030345 ENSMUSP00000113948 ENSMUSP00000063325 …	under	0.78291	0.999893	0.0689655
Genetic Information Processing	Replication and repair	mmu03420	Nucleotide excision repair	2	578	29	6012	0.00346	0.004824	ENSMUSP00000136972 ENSMUSP00000138108	ENSMUSP00000025649 ENSMUSP00000110771 ENSMUSP00000028817 ENSMUSP00000016680 ENSMUSP00000023867 ENSMUSP00000000767 ENSMUSP00000030134 ENSMUSP00000105383 ENSMUSP00000054380 ENSMUSP00000039776 ENSMUSP00000001565 ENSMUSP00000030091 ENSMUSP00000110995 ENSMUSP00000083652 ENSMUSP00000131136 ENSMUSP00000025241 ENSMUSP00000031333 ENSMUSP00000021523 ENSMUSP00000110198 ENSMUSP00000039621 ENSMUSP00000099621 …	under	0.78291	0.999893	0.0689655
Organismal Systems	Nervous system	mmu04730	Long-term depression	2	578	30	6012	0.00346	0.00499	ENSMUSP00000099617 ENSMUSP00000105736	ENSMUSP00000142326 ENSMUSP00000100075 ENSMUSP00000020930 ENSMUSP00000007708 ENSMUSP00000000001 ENSMUSP00000156154 ENSMUSP00000085179 ENSMUSP00000025912 ENSMUSP00000020608 ENSMUSP00000025541 ENSMUSP00000009774 ENSMUSP00000049584 ENSMUSP00000051619 ENSMUSP00000038150 ENSMUSP00000138788 ENSMUSP00000029445 ENSMUSP00000000153 ENSMUSP00000043190 ENSMUSP00000107339 ENSMUSP00000026572 ENSMUSP00000070868 …	under	0.798741	0.999893	0.0666667
Organismal Systems	Endocrine system	mmu04916	Melanogenesis	2	578	30	6012	0.00346	0.00499	ENSMUSP00000058629 ENSMUSP00000105736	ENSMUSP00000142326 ENSMUSP00000019514 ENSMUSP00000000001 ENSMUSP00000156154 ENSMUSP00000130594 ENSMUSP00000085179 ENSMUSP00000025912 ENSMUSP00000025541 ENSMUSP00000005606 ENSMUSP00000051619 ENSMUSP00000138788 ENSMUSP00000029445 ENSMUSP00000099573 ENSMUSP00000129999 ENSMUSP00000107339 ENSMUSP00000026572 ENSMUSP00000110398 ENSMUSP00000023165 ENSMUSP00000005066 ENSMUSP00000066789 ENSMUSP00000108571 …	under	0.798741	0.999893	0.0666667
Organismal Systems	Endocrine system	mmu04920	Adipocytokine signaling pathway	2	578	30	6012	0.00346	0.00499	ENSMUSP00000080974 ENSMUSP00000025263	ENSMUSP00000038555 ENSMUSP00000034046 ENSMUSP00000108528 ENSMUSP00000046585 ENSMUSP00000080974 ENSMUSP00000029812 ENSMUSP00000099510 ENSMUSP00000058757 ENSMUSP00000025835 ENSMUSP00000025867 ENSMUSP00000033939 ENSMUSP00000004330 ENSMUSP00000045291 ENSMUSP00000025263 ENSMUSP00000132499 ENSMUSP00000120152 ENSMUSP00000063166 ENSMUSP00000034359 ENSMUSP00000020634 ENSMUSP00000030336 ENSMUSP00000030784 …	under	0.798741	0.999893	0.0666667
Metabolism	Metabolism of other amino acids	mmu00410	beta-Alanine metabolism	1	578	16	6012	0.00173	0.002661	ENSMUSP00000045606	ENSMUSP00000031411 ENSMUSP00000025546 ENSMUSP00000120976 ENSMUSP00000028004 ENSMUSP00000026538 ENSMUSP00000031524 ENSMUSP00000056276 ENSMUSP00000082288 ENSMUSP00000063412 ENSMUSP00000067767 ENSMUSP00000063325 ENSMUSP00000041260 ENSMUSP00000045606 ENSMUSP00000065089 ENSMUSP00000023805 ENSMUSP00000095970	under	0.80199	0.999893	0.0625
Metabolism	Xenobiotics biodegradation and metabolism	mmu00982	Drug metabolism - cytochrome P450	1	578	16	6012	0.00173	0.002661	ENSMUSP00000005964	ENSMUSP00000118874 ENSMUSP00000026013 ENSMUSP00000056276 ENSMUSP00000026050 ENSMUSP00000058683 ENSMUSP00000005964 ENSMUSP00000031897 ENSMUSP00000031982 ENSMUSP00000102665 ENSMUSP00000112923 ENSMUSP00000129565 ENSMUSP00000001715 ENSMUSP00000040550 ENSMUSP00000028005 ENSMUSP00000004134 ENSMUSP00000029489	under	0.80199	0.999893	0.0625
Metabolism	Lipid metabolism	mmu01040	Biosynthesis of unsaturated fatty acids	1	578	16	6012	0.00173	0.002661	ENSMUSP00000026220	ENSMUSP00000042351 ENSMUSP00000025385 ENSMUSP00000030340 ENSMUSP00000063412 ENSMUSP00000019382 ENSMUSP00000063325 ENSMUSP00000028619 ENSMUSP00000021649 ENSMUSP00000126448 ENSMUSP00000044955 ENSMUSP00000129121 ENSMUSP00000060462 ENSMUSP00000010807 ENSMUSP00000034904 ENSMUSP00000006557 ENSMUSP00000026220	under	0.80199	0.999893	0.0625
Organismal Systems	Endocrine system	mmu04924	Renin secretion	1	578	16	6012	0.00173	0.002661	ENSMUSP00000105736	ENSMUSP00000006235 ENSMUSP00000142326 ENSMUSP00000019514 ENSMUSP00000000001 ENSMUSP00000085179 ENSMUSP00000025912 ENSMUSP00000025541 ENSMUSP00000005606 ENSMUSP00000049584 ENSMUSP00000071040 ENSMUSP00000038150 ENSMUSP00000099573 ENSMUSP00000125722 ENSMUSP00000099944 ENSMUSP00000099583 ENSMUSP00000105736	under	0.80199	0.999893	0.0625
Human Diseases	Cancer: specific types	mmu05219	Bladder cancer	1	578	16	6012	0.00173	0.002661	ENSMUSP00000044903	ENSMUSP00000156154 ENSMUSP00000051619 ENSMUSP00000029445 ENSMUSP00000107339 ENSMUSP00000026572 ENSMUSP00000005066 ENSMUSP00000105155 ENSMUSP00000001155 ENSMUSP00000108571 ENSMUSP00000153607 ENSMUSP00000137333 ENSMUSP00000044903 ENSMUSP00000121111 ENSMUSP00000006911 ENSMUSP00000042987 ENSMUSP00000113252	under	0.80199	0.999893	0.0625
Human Diseases	Endocrine and metabolic disease	mmu04932	Non-alcoholic fatty liver disease	7	578	93	6012	0.012111	0.015469	ENSMUSP00000061958 ENSMUSP00000025263 ENSMUSP00000028881 ENSMUSP00000115419 ENSMUSP00000000175 ENSMUSP00000028882 ENSMUSP00000125731	ENSMUSP00000022062 ENSMUSP00000027111 ENSMUSP00000033176 ENSMUSP00000071214 ENSMUSP00000026743 ENSMUSP00000042967 ENSMUSP00000010007 ENSMUSP00000027478 ENSMUSP00000034276 ENSMUSP00000144904 ENSMUSP00000056774 ENSMUSP00000054634 ENSMUSP00000013737 ENSMUSP00000098058 ENSMUSP00000029812 ENSMUSP00000020209 ENSMUSP00000140546 ENSMUSP00000039692 ENSMUSP00000075150 ENSMUSP00000033093 ENSMUSP00000002678 …	under	0.803615	0.999893	0.0752688
Human Diseases	Cancer: overview	mmu05231	Choline metabolism in cancer	3	578	44	6012	0.00519	0.007319	ENSMUSP00000118727 ENSMUSP00000064423 ENSMUSP00000154338	ENSMUSP00000156154 ENSMUSP00000056774 ENSMUSP00000102106 ENSMUSP00000051619 ENSMUSP00000138788 ENSMUSP00000029445 ENSMUSP00000098058 ENSMUSP00000150147 ENSMUSP00000099510 ENSMUSP00000106934 ENSMUSP00000038225 ENSMUSP00000035037 ENSMUSP00000107339 ENSMUSP00000026572 ENSMUSP00000081263 ENSMUSP00000102852 ENSMUSP00000033505 ENSMUSP00000078721 ENSMUSP00000036384 ENSMUSP00000103274 ENSMUSP00000101315 …	under	0.809245	0.999893	0.0681818
Metabolism	Metabolism of cofactors and vitamins	mmu00860	Porphyrin metabolism	1	578	17	6012	0.00173	0.002828	ENSMUSP00000043092	ENSMUSP00000045841 ENSMUSP00000026613 ENSMUSP00000002064 ENSMUSP00000004172 ENSMUSP00000058683 ENSMUSP00000055455 ENSMUSP00000043092 ENSMUSP00000005548 ENSMUSP00000103068 ENSMUSP00000072863 ENSMUSP00000033717 ENSMUSP00000030446 ENSMUSP00000041820 ENSMUSP00000142979 ENSMUSP00000080081 ENSMUSP00000076575 ENSMUSP00000108143	under	0.821078	0.999893	0.0588235
Metabolism	Lipid metabolism	mmu00564	Glycerophospholipid metabolism	3	578	45	6012	0.00519	0.007485	ENSMUSP00000118727 ENSMUSP00000064423 ENSMUSP00000145041	ENSMUSP00000028167 ENSMUSP00000067002 ENSMUSP00000044078 ENSMUSP00000113820 ENSMUSP00000034377 ENSMUSP00000106934 ENSMUSP00000037107 ENSMUSP00000049252 ENSMUSP00000117509 ENSMUSP00000001240 ENSMUSP00000078721 ENSMUSP00000121973 ENSMUSP00000099470 ENSMUSP00000024594 ENSMUSP00000068690 ENSMUSP00000070868 ENSMUSP00000118727 ENSMUSP00000004381 ENSMUSP00000034466 ENSMUSP00000023289 ENSMUSP00000101478 …	under	0.821304	0.999893	0.0666667
Environmental Information Processing	Signal transduction	mmu04371	Apelin signaling pathway	4	578	58	6012	0.00692	0.009647	ENSMUSP00000018610 ENSMUSP00000087485 ENSMUSP00000099617 ENSMUSP00000105736	ENSMUSP00000142326 ENSMUSP00000019514 ENSMUSP00000101241 ENSMUSP00000020930 ENSMUSP00000106656 ENSMUSP00000000001 ENSMUSP00000156154 ENSMUSP00000130594 ENSMUSP00000025912 ENSMUSP00000025541 ENSMUSP00000005606 ENSMUSP00000049584 ENSMUSP00000051619 ENSMUSP00000038150 ENSMUSP00000029445 ENSMUSP00000099573 ENSMUSP00000099510 ENSMUSP00000099878 ENSMUSP00000090086 ENSMUSP00000107339 ENSMUSP00000026572 …	under	0.822182	0.999893	0.0689655
Organismal Systems	Nervous system	mmu04722	Neurotrophin signaling pathway	4	578	58	6012	0.00692	0.009647	ENSMUSP00000070993 ENSMUSP00000101803 ENSMUSP00000016672 ENSMUSP00000061958	ENSMUSP00000079991 ENSMUSP00000070993 ENSMUSP00000107829 ENSMUSP00000019514 ENSMUSP00000033671 ENSMUSP00000119328 ENSMUSP00000156154 ENSMUSP00000101803 ENSMUSP00000056774 ENSMUSP00000054634 ENSMUSP00000102106 ENSMUSP00000007959 ENSMUSP00000051619 ENSMUSP00000066238 ENSMUSP00000088174 ENSMUSP00000029445 ENSMUSP00000098058 ENSMUSP00000107523 ENSMUSP00000029812 ENSMUSP00000017920 ENSMUSP00000058757 …	under	0.822182	0.999893	0.0689655
Environmental Information Processing	Signal transduction	mmu04022	cGMP-PKG signaling pathway	4	578	59	6012	0.00692	0.009814	ENSMUSP00000083077 ENSMUSP00000081956 ENSMUSP00000080538 ENSMUSP00000105736	ENSMUSP00000039657 ENSMUSP00000099922 ENSMUSP00000020107 ENSMUSP00000135935 ENSMUSP00000083077 ENSMUSP00000020673 ENSMUSP00000134023 ENSMUSP00000152813 ENSMUSP00000016463 ENSMUSP00000142326 ENSMUSP00000034049 ENSMUSP00000019514 ENSMUSP00000009036 ENSMUSP00000020930 ENSMUSP00000021142 ENSMUSP00000039109 ENSMUSP00000000001 ENSMUSP00000156154 ENSMUSP00000069549 ENSMUSP00000083474 ENSMUSP00000130594 …	under	0.832343	0.999893	0.0677966
Metabolism	Carbohydrate metabolism	mmu00562	Inositol phosphate metabolism	3	578	46	6012	0.00519	0.007651	ENSMUSP00000081122 ENSMUSP00000111457 ENSMUSP00000105736	ENSMUSP00000079991 ENSMUSP00000127941 ENSMUSP00000036162 ENSMUSP00000082288 ENSMUSP00000048057 ENSMUSP00000025912 ENSMUSP00000113308 ENSMUSP00000068174 ENSMUSP00000006912 ENSMUSP00000018691 ENSMUSP00000038225 ENSMUSP00000035037 ENSMUSP00000123539 ENSMUSP00000102852 ENSMUSP00000126092 ENSMUSP00000101315 ENSMUSP00000013970 ENSMUSP00000019283 ENSMUSP00000095314 ENSMUSP00000153403 ENSMUSP00000033700 …	under	0.832707	0.999893	0.0652174
Metabolism	Amino acid metabolism	mmu00380	Tryptophan metabolism	1	578	18	6012	0.00173	0.002994	ENSMUSP00000003907	ENSMUSP00000031411 ENSMUSP00000120976 ENSMUSP00000028610 ENSMUSP00000028004 ENSMUSP00000034547 ENSMUSP00000026538 ENSMUSP00000106481 ENSMUSP00000026013 ENSMUSP00000067767 ENSMUSP00000029610 ENSMUSP00000060346 ENSMUSP00000041260 ENSMUSP00000007005 ENSMUSP00000065089 ENSMUSP00000101825 ENSMUSP00000040550 ENSMUSP00000092769 ENSMUSP00000003907	under	0.838328	0.999893	0.0555556
Metabolism	Carbohydrate metabolism	mmu00500	Starch and sucrose metabolism	1	578	18	6012	0.00173	0.002994	ENSMUSP00000114019	ENSMUSP00000097282 ENSMUSP00000000642 ENSMUSP00000051215 ENSMUSP00000071231 ENSMUSP00000035743 ENSMUSP00000061227 ENSMUSP00000049355 ENSMUSP00000099939 ENSMUSP00000084582 ENSMUSP00000101866 ENSMUSP00000114273 ENSMUSP00000047564 ENSMUSP00000081998 ENSMUSP00000124149 ENSMUSP00000114019 ENSMUSP00000003964 ENSMUSP00000023393 ENSMUSP00000070368	under	0.838328	0.999893	0.0555556
		mmu03250	Viral life cycle - HIV-1	2	578	33	6012	0.00346	0.005489	ENSMUSP00000117987 ENSMUSP00000124599	ENSMUSP00000003310 ENSMUSP00000035086 ENSMUSP00000059717 ENSMUSP00000003527 ENSMUSP00000099933 ENSMUSP00000019405 ENSMUSP00000108356 ENSMUSP00000117987 ENSMUSP00000031383 ENSMUSP00000135150 ENSMUSP00000036206 ENSMUSP00000012679 ENSMUSP00000014546 ENSMUSP00000026434 ENSMUSP00000030207 ENSMUSP00000023165 ENSMUSP00000039394 ENSMUSP00000034388 ENSMUSP00000057731 ENSMUSP00000000925 ENSMUSP00000051921 …	under	0.840252	0.999893	0.0606061
Metabolism	Glycan biosynthesis and metabolism	mmu00510	N-Glycan biosynthesis	2	578	34	6012	0.00346	0.005655	ENSMUSP00000057905 ENSMUSP00000030121	ENSMUSP00000032143 ENSMUSP00000093965 ENSMUSP00000083928 ENSMUSP00000113116 ENSMUSP00000112081 ENSMUSP00000030538 ENSMUSP00000035879 ENSMUSP00000032114 ENSMUSP00000036996 ENSMUSP00000035010 ENSMUSP00000151568 ENSMUSP00000043580 ENSMUSP00000080484 ENSMUSP00000057905 ENSMUSP00000095949 ENSMUSP00000022781 ENSMUSP00000050979 ENSMUSP00000103086 ENSMUSP00000097770 ENSMUSP00000038359 ENSMUSP00000136327 …	under	0.852266	0.999893	0.0588235
Human Diseases	Cancer: specific types	mmu05223	Non-small cell lung cancer	2	578	34	6012	0.00346	0.005655	ENSMUSP00000126024 ENSMUSP00000030747	ENSMUSP00000079991 ENSMUSP00000025083 ENSMUSP00000156154 ENSMUSP00000056774 ENSMUSP00000102106 ENSMUSP00000051619 ENSMUSP00000102980 ENSMUSP00000138788 ENSMUSP00000102981 ENSMUSP00000029445 ENSMUSP00000018353 ENSMUSP00000033093 ENSMUSP00000035037 ENSMUSP00000126024 ENSMUSP00000107339 ENSMUSP00000026572 ENSMUSP00000101315 ENSMUSP00000120152 ENSMUSP00000005066 ENSMUSP00000094528 ENSMUSP00000001155 …	under	0.852266	0.999893	0.0588235
Metabolism	Carbohydrate metabolism	mmu00052	Galactose metabolism	1	578	19	6012	0.00173	0.00316	ENSMUSP00000030121	ENSMUSP00000097282 ENSMUSP00000000642 ENSMUSP00000051215 ENSMUSP00000061227 ENSMUSP00000099939 ENSMUSP00000021614 ENSMUSP00000084582 ENSMUSP00000101866 ENSMUSP00000039114 ENSMUSP00000100045 ENSMUSP00000055803 ENSMUSP00000020522 ENSMUSP00000040244 ENSMUSP00000021114 ENSMUSP00000040580 ENSMUSP00000081745 ENSMUSP00000155809 ENSMUSP00000099600 ENSMUSP00000030121	under	0.853918	0.999893	0.0526316
Metabolism	Amino acid metabolism	mmu00250	Alanine, aspartate and glutamate metabolism	1	578	19	6012	0.00173	0.00316	ENSMUSP00000034097	ENSMUSP00000022322 ENSMUSP00000034097 ENSMUSP00000026196 ENSMUSP00000110158 ENSMUSP00000110155 ENSMUSP00000013773 ENSMUSP00000043821 ENSMUSP00000124274 ENSMUSP00000016105 ENSMUSP00000023043 ENSMUSP00000032057 ENSMUSP00000083375 ENSMUSP00000099904 ENSMUSP00000111204 ENSMUSP00000120632 ENSMUSP00000051709 ENSMUSP00000023432 ENSMUSP00000136572 ENSMUSP00000059313	under	0.853918	0.999893	0.0526316
Metabolism	Glycan biosynthesis and metabolism	mmu00514	Other types of O-glycan biosynthesis	1	578	19	6012	0.00173	0.00316	ENSMUSP00000030121	ENSMUSP00000034021 ENSMUSP00000034458 ENSMUSP00000004968 ENSMUSP00000045409 ENSMUSP00000038166 ENSMUSP00000047923 ENSMUSP00000000430 ENSMUSP00000125315 ENSMUSP00000020493 ENSMUSP00000097972 ENSMUSP00000053122 ENSMUSP00000061610 ENSMUSP00000050246 ENSMUSP00000123848 ENSMUSP00000081947 ENSMUSP00000047931 ENSMUSP00000030121 ENSMUSP00000036240 ENSMUSP00000059224	under	0.853918	0.999893	0.0526316
Genetic Information Processing	Transcription	mmu03020	RNA polymerase	1	578	19	6012	0.00173	0.00316	ENSMUSP00000019882	ENSMUSP00000050771 ENSMUSP00000031167 ENSMUSP00000021405 ENSMUSP00000004786 ENSMUSP00000099494 ENSMUSP00000084252 ENSMUSP00000148830 ENSMUSP00000029741 ENSMUSP00000093980 ENSMUSP00000026322 ENSMUSP00000058355 ENSMUSP00000076418 ENSMUSP00000038505 ENSMUSP00000060858 ENSMUSP00000019882 ENSMUSP00000023113 ENSMUSP00000020877 ENSMUSP00000025106 ENSMUSP00000029999	under	0.853918	0.999893	0.0526316
Cellular Processes	Cell growth and death	mmu04210	Apoptosis	5	578	75	6012	0.008651	0.012475	ENSMUSP00000071486 ENSMUSP00000025263 ENSMUSP00000007803 ENSMUSP00000030747 ENSMUSP00000125731	ENSMUSP00000071486 ENSMUSP00000092697 ENSMUSP00000029699 ENSMUSP00000025486 ENSMUSP00000057291 ENSMUSP00000121203 ENSMUSP00000076777 ENSMUSP00000027777 ENSMUSP00000006235 ENSMUSP00000051033 ENSMUSP00000025891 ENSMUSP00000078429 ENSMUSP00000041104 ENSMUSP00000015667 ENSMUSP00000071214 ENSMUSP00000068895 ENSMUSP00000016400 ENSMUSP00000156154 ENSMUSP00000032779 ENSMUSP00000056774 ENSMUSP00000125291 …	under	0.860244	0.999893	0.0666667
Organismal Systems	Immune system	mmu04670	Leukocyte transendothelial migration	3	578	49	6012	0.00519	0.00815	ENSMUSP00000071486 ENSMUSP00000083587 ENSMUSP00000061958	ENSMUSP00000071486 ENSMUSP00000066068 ENSMUSP00000113071 ENSMUSP00000021554 ENSMUSP00000000299 ENSMUSP00000022369 ENSMUSP00000068468 ENSMUSP00000079991 ENSMUSP00000087457 ENSMUSP00000152813 ENSMUSP00000063734 ENSMUSP00000140404 ENSMUSP00000015484 ENSMUSP00000022622 ENSMUSP00000142326 ENSMUSP00000101913 ENSMUSP00000005889 ENSMUSP00000016094 ENSMUSP00000083587 ENSMUSP00000099718 ENSMUSP00000000001 …	under	0.863232	0.999893	0.0612245
Human Diseases	Infectious disease: bacterial	mmu05100	Bacterial invasion of epithelial cells	3	578	49	6012	0.00519	0.00815	ENSMUSP00000071486 ENSMUSP00000054499 ENSMUSP00000007799	ENSMUSP00000050220 ENSMUSP00000071486 ENSMUSP00000022369 ENSMUSP00000054499 ENSMUSP00000000137 ENSMUSP00000109451 ENSMUSP00000087457 ENSMUSP00000137503 ENSMUSP00000072199 ENSMUSP00000072334 ENSMUSP00000076933 ENSMUSP00000023128 ENSMUSP00000143438 ENSMUSP00000144235 ENSMUSP00000127276 ENSMUSP00000081531 ENSMUSP00000056774 ENSMUSP00000054634 ENSMUSP00000073691 ENSMUSP00000007959 ENSMUSP00000102536 …	under	0.863232	0.999893	0.0612245
Cellular Processes	Transport and catabolism	mmu04140	Autophagy - animal	6	578	89	6012	0.010381	0.014804	ENSMUSP00000082682 ENSMUSP00000015981 ENSMUSP00000007803 ENSMUSP00000136287 ENSMUSP00000040307 ENSMUSP00000154338	ENSMUSP00000121203 ENSMUSP00000006235 ENSMUSP00000109230 ENSMUSP00000107829 ENSMUSP00000127330 ENSMUSP00000071214 ENSMUSP00000156154 ENSMUSP00000082682 ENSMUSP00000056774 ENSMUSP00000020608 ENSMUSP00000030399 ENSMUSP00000152169 ENSMUSP00000005606 ENSMUSP00000009774 ENSMUSP00000033824 ENSMUSP00000051619 ENSMUSP00000003121 ENSMUSP00000020316 ENSMUSP00000029445 ENSMUSP00000065456 ENSMUSP00000099573 …	under	0.869448	0.999893	0.0674157
Human Diseases	Drug resistance: antineoplastic	mmu01522	Endocrine resistance	2	578	36	6012	0.00346	0.005988	ENSMUSP00000061958 ENSMUSP00000028288	ENSMUSP00000156154 ENSMUSP00000130594 ENSMUSP00000085179 ENSMUSP00000056774 ENSMUSP00000102106 ENSMUSP00000078741 ENSMUSP00000005606 ENSMUSP00000051619 ENSMUSP00000029445 ENSMUSP00000099573 ENSMUSP00000099510 ENSMUSP00000033093 ENSMUSP00000035037 ENSMUSP00000061958 ENSMUSP00000107339 ENSMUSP00000026572 ENSMUSP00000101315 ENSMUSP00000005066 ENSMUSP00000105155 ENSMUSP00000028288 ENSMUSP00000001155 …	under	0.873856	0.999893	0.0555556
Human Diseases	Neurodegenerative disease	mmu05010	Alzheimer disease	18	578	235	6012	0.031142	0.039088	ENSMUSP00000113942 ENSMUSP00000060246 ENSMUSP00000133302 ENSMUSP00000035065 ENSMUSP00000001513 ENSMUSP00000025263 ENSMUSP00000018610 ENSMUSP00000028881 ENSMUSP00000115419 ENSMUSP00000000175 ENSMUSP00000126067 ENSMUSP00000028882 ENSMUSP00000058629 ENSMUSP00000099617 ENSMUSP00000030747 ENSMUSP00000015596 ENSMUSP00000105736 ENSMUSP00000125731	ENSMUSP00000044004 ENSMUSP00000026495 ENSMUSP00000026459 ENSMUSP00000135935 ENSMUSP00000022062 ENSMUSP00000027111 ENSMUSP00000113942 ENSMUSP00000025083 ENSMUSP00000020673 ENSMUSP00000134023 ENSMUSP00000076777 ENSMUSP00000071054 ENSMUSP00000016463 ENSMUSP00000027432 ENSMUSP00000033176 ENSMUSP00000051033 ENSMUSP00000025891 ENSMUSP00000078429 ENSMUSP00000015484 ENSMUSP00000007212 ENSMUSP00000001566 …	under	0.877213	0.999893	0.0765957
Metabolism	Carbohydrate metabolism	mmu00051	Fructose and mannose metabolism	1	578	21	6012	0.00173	0.003493	ENSMUSP00000017534	ENSMUSP00000097282 ENSMUSP00000000642 ENSMUSP00000032934 ENSMUSP00000051215 ENSMUSP00000021614 ENSMUSP00000039114 ENSMUSP00000100045 ENSMUSP00000020522 ENSMUSP00000017534 ENSMUSP00000106180 ENSMUSP00000040244 ENSMUSP00000036696 ENSMUSP00000142079 ENSMUSP00000023396 ENSMUSP00000107914 ENSMUSP00000155711 ENSMUSP00000155809 ENSMUSP00000035564 ENSMUSP00000034856 ENSMUSP00000068939 ENSMUSP00000048643	under	0.88074	0.999893	0.047619
Cellular Processes	Transport and catabolism	mmu04136	Autophagy - other	1	578	21	6012	0.00173	0.003493	ENSMUSP00000136287	ENSMUSP00000020608 ENSMUSP00000009774 ENSMUSP00000099510 ENSMUSP00000133215 ENSMUSP00000119369 ENSMUSP00000139427 ENSMUSP00000023343 ENSMUSP00000044769 ENSMUSP00000026671 ENSMUSP00000108815 ENSMUSP00000018711 ENSMUSP00000111479 ENSMUSP00000136287 ENSMUSP00000045201 ENSMUSP00000034428 ENSMUSP00000032264 ENSMUSP00000038489 ENSMUSP00000033570 ENSMUSP00000139608 ENSMUSP00000045474 ENSMUSP00000099349	under	0.88074	0.999893	0.047619
Organismal Systems	Immune system	mmu04662	B cell receptor signaling pathway	3	578	51	6012	0.00519	0.008483	ENSMUSP00000004377 ENSMUSP00000070073 ENSMUSP00000052777	ENSMUSP00000079991 ENSMUSP00000004377 ENSMUSP00000127941 ENSMUSP00000100075 ENSMUSP00000005889 ENSMUSP00000113852 ENSMUSP00000048057 ENSMUSP00000156154 ENSMUSP00000056774 ENSMUSP00000102106 ENSMUSP00000033617 ENSMUSP00000104255 ENSMUSP00000051619 ENSMUSP00000071040 ENSMUSP00000138788 ENSMUSP00000029445 ENSMUSP00000098058 ENSMUSP00000029812 ENSMUSP00000070073 ENSMUSP00000052777 ENSMUSP00000035037 …	under	0.880762	0.999893	0.0588235
Organismal Systems	Endocrine system	mmu04914	Progesterone-mediated oocyte maturation	2	578	37	6012	0.00346	0.006154	ENSMUSP00000061958 ENSMUSP00000020543	ENSMUSP00000024739 ENSMUSP00000091921 ENSMUSP00000142326 ENSMUSP00000033671 ENSMUSP00000119328 ENSMUSP00000000001 ENSMUSP00000156154 ENSMUSP00000130594 ENSMUSP00000056774 ENSMUSP00000005606 ENSMUSP00000099885 ENSMUSP00000051619 ENSMUSP00000031534 ENSMUSP00000099573 ENSMUSP00000035037 ENSMUSP00000061958 ENSMUSP00000107339 ENSMUSP00000101315 ENSMUSP00000005066 ENSMUSP00000001155 ENSMUSP00000122420 …	under	0.883526	0.999893	0.0540541
Human Diseases	Infectious disease: bacterial	mmu05132	Salmonella infection	12	578	166	6012	0.020761	0.027611	ENSMUSP00000071486 ENSMUSP00000113942 ENSMUSP00000060246 ENSMUSP00000056669 ENSMUSP00000029623 ENSMUSP00000027015 ENSMUSP00000001513 ENSMUSP00000061958 ENSMUSP00000025263 ENSMUSP00000030051 ENSMUSP00000028881 ENSMUSP00000040307	ENSMUSP00000090633 ENSMUSP00000109938 ENSMUSP00000018851 ENSMUSP00000071486 ENSMUSP00000024739 ENSMUSP00000052020 ENSMUSP00000138350 ENSMUSP00000020238 ENSMUSP00000091921 ENSMUSP00000034756 ENSMUSP00000113942 ENSMUSP00000025083 ENSMUSP00000032629 ENSMUSP00000000137 ENSMUSP00000109451 ENSMUSP00000076777 ENSMUSP00000152813 ENSMUSP00000109552 ENSMUSP00000137503 ENSMUSP00000035400 ENSMUSP00000090854 …	under	0.886679	0.999893	0.0722892
Human Diseases	Neurodegenerative disease	mmu05022	Pathways of neurodegeneration - multiple diseases	21	578	273	6012	0.036332	0.045409	ENSMUSP00000060246 ENSMUSP00000035065 ENSMUSP00000001513 ENSMUSP00000061958 ENSMUSP00000015981 ENSMUSP00000025263 ENSMUSP00000018610 ENSMUSP00000028881 ENSMUSP00000115419 ENSMUSP00000007803 ENSMUSP00000000175 ENSMUSP00000126067 ENSMUSP00000028882 ENSMUSP00000058629 ENSMUSP00000125647 ENSMUSP00000099702 ENSMUSP00000099617 ENSMUSP00000030747 ENSMUSP00000015596 ENSMUSP00000105736 ENSMUSP00000125731	ENSMUSP00000028222 ENSMUSP00000030164 ENSMUSP00000026495 ENSMUSP00000026459 ENSMUSP00000135935 ENSMUSP00000022062 ENSMUSP00000059033 ENSMUSP00000086626 ENSMUSP00000027111 ENSMUSP00000025083 ENSMUSP00000020673 ENSMUSP00000134023 ENSMUSP00000076777 ENSMUSP00000109552 ENSMUSP00000071054 ENSMUSP00000016463 ENSMUSP00000027432 ENSMUSP00000033176 ENSMUSP00000051033 ENSMUSP00000028610 ENSMUSP00000025891 …	under	0.889121	0.999893	0.0769231
Environmental Information Processing	Signal transduction	mmu04072	Phospholipase D signaling pathway	4	578	66	6012	0.00692	0.010978	ENSMUSP00000118727 ENSMUSP00000064423 ENSMUSP00000154338 ENSMUSP00000105736	ENSMUSP00000079991 ENSMUSP00000072199 ENSMUSP00000022622 ENSMUSP00000020930 ENSMUSP00000113852 ENSMUSP00000156154 ENSMUSP00000130594 ENSMUSP00000085179 ENSMUSP00000025912 ENSMUSP00000056774 ENSMUSP00000102106 ENSMUSP00000007959 ENSMUSP00000051619 ENSMUSP00000051814 ENSMUSP00000029445 ENSMUSP00000099510 ENSMUSP00000058757 ENSMUSP00000106934 ENSMUSP00000000153 ENSMUSP00000038225 ENSMUSP00000035037 …	under	0.890668	0.999893	0.0606061
Organismal Systems	Nervous system	mmu04723	Retrograde endocannabinoid signaling	4	578	66	6012	0.00692	0.010978	ENSMUSP00000035065 ENSMUSP00000061958 ENSMUSP00000087485 ENSMUSP00000105736	ENSMUSP00000027111 ENSMUSP00000142326 ENSMUSP00000101241 ENSMUSP00000106656 ENSMUSP00000042967 ENSMUSP00000027478 ENSMUSP00000000001 ENSMUSP00000156154 ENSMUSP00000043088 ENSMUSP00000130594 ENSMUSP00000025912 ENSMUSP00000144904 ENSMUSP00000025541 ENSMUSP00000005606 ENSMUSP00000013737 ENSMUSP00000049584 ENSMUSP00000051619 ENSMUSP00000038150 ENSMUSP00000138788 ENSMUSP00000035065 ENSMUSP00000099573 …	under	0.890668	0.999893	0.0606061
Human Diseases	Cancer: specific types	mmu05218	Melanoma	1	578	22	6012	0.00173	0.003659	ENSMUSP00000126024	ENSMUSP00000156154 ENSMUSP00000056774 ENSMUSP00000051619 ENSMUSP00000029445 ENSMUSP00000033093 ENSMUSP00000035037 ENSMUSP00000126024 ENSMUSP00000107339 ENSMUSP00000026572 ENSMUSP00000101315 ENSMUSP00000005066 ENSMUSP00000001155 ENSMUSP00000077757 ENSMUSP00000108571 ENSMUSP00000103878 ENSMUSP00000044938 ENSMUSP00000121111 ENSMUSP00000006911 ENSMUSP00000103981 ENSMUSP00000013807 ENSMUSP00000001780 …	under	0.892246	0.999893	0.0454545
Organismal Systems	Nervous system	mmu04725	Cholinergic synapse	2	578	39	6012	0.00346	0.006487	ENSMUSP00000087485 ENSMUSP00000105736	ENSMUSP00000142326 ENSMUSP00000101241 ENSMUSP00000106656 ENSMUSP00000000001 ENSMUSP00000156154 ENSMUSP00000130594 ENSMUSP00000025912 ENSMUSP00000056774 ENSMUSP00000025541 ENSMUSP00000005606 ENSMUSP00000049584 ENSMUSP00000051619 ENSMUSP00000038150 ENSMUSP00000138788 ENSMUSP00000029445 ENSMUSP00000099573 ENSMUSP00000129999 ENSMUSP00000043190 ENSMUSP00000035037 ENSMUSP00000107339 ENSMUSP00000026572 …	under	0.900842	0.999893	0.0512821
Human Diseases	Cancer: specific types	mmu05215	Prostate cancer	2	578	39	6012	0.00346	0.006487	ENSMUSP00000029711 ENSMUSP00000030747	ENSMUSP00000024739 ENSMUSP00000020238 ENSMUSP00000091921 ENSMUSP00000156154 ENSMUSP00000056774 ENSMUSP00000102106 ENSMUSP00000051619 ENSMUSP00000029445 ENSMUSP00000029812 ENSMUSP00000099510 ENSMUSP00000035037 ENSMUSP00000025867 ENSMUSP00000107339 ENSMUSP00000033939 ENSMUSP00000026572 ENSMUSP00000004330 ENSMUSP00000110398 ENSMUSP00000101315 ENSMUSP00000023165 ENSMUSP00000005066 ENSMUSP00000001155 …	under	0.900842	0.999893	0.0512821
Organismal Systems	Nervous system	mmu04727	GABAergic synapse	1	578	23	6012	0.00173	0.003826	ENSMUSP00000087485	ENSMUSP00000099364 ENSMUSP00000142326 ENSMUSP00000101241 ENSMUSP00000110158 ENSMUSP00000106656 ENSMUSP00000000001 ENSMUSP00000110155 ENSMUSP00000130594 ENSMUSP00000005606 ENSMUSP00000138788 ENSMUSP00000099573 ENSMUSP00000145346 ENSMUSP00000121127 ENSMUSP00000083375 ENSMUSP00000106018 ENSMUSP00000105155 ENSMUSP00000125697 ENSMUSP00000087485 ENSMUSP00000018711 ENSMUSP00000023099 ENSMUSP00000034428 …	under	0.902643	0.999893	0.0434783
Human Diseases	Neurodegenerative disease	mmu05020	Prion disease	13	578	182	6012	0.022491	0.030273	ENSMUSP00000060246 ENSMUSP00000001513 ENSMUSP00000061958 ENSMUSP00000025263 ENSMUSP00000028288 ENSMUSP00000028881 ENSMUSP00000115419 ENSMUSP00000000175 ENSMUSP00000039600 ENSMUSP00000028882 ENSMUSP00000007799 ENSMUSP00000028233 ENSMUSP00000030747	ENSMUSP00000028222 ENSMUSP00000015800 ENSMUSP00000026495 ENSMUSP00000026459 ENSMUSP00000022062 ENSMUSP00000027111 ENSMUSP00000025083 ENSMUSP00000020673 ENSMUSP00000134023 ENSMUSP00000076777 ENSMUSP00000140404 ENSMUSP00000071054 ENSMUSP00000016463 ENSMUSP00000027432 ENSMUSP00000033176 ENSMUSP00000051033 ENSMUSP00000078429 ENSMUSP00000025918 ENSMUSP00000015484 ENSMUSP00000007212 ENSMUSP00000001566 …	under	0.903469	0.999893	0.0714286
Human Diseases	Cancer: specific types	mmu05226	Gastric cancer	2	578	40	6012	0.00346	0.006653	ENSMUSP00000001592 ENSMUSP00000058629	ENSMUSP00000009058 ENSMUSP00000041204 ENSMUSP00000156154 ENSMUSP00000056774 ENSMUSP00000102106 ENSMUSP00000051619 ENSMUSP00000029445 ENSMUSP00000099510 ENSMUSP00000033093 ENSMUSP00000002678 ENSMUSP00000035037 ENSMUSP00000001592 ENSMUSP00000107339 ENSMUSP00000026572 ENSMUSP00000110398 ENSMUSP00000131687 ENSMUSP00000049007 ENSMUSP00000101315 ENSMUSP00000005066 ENSMUSP00000025393 ENSMUSP00000001155 …	under	0.90857	0.999893	0.05
Environmental Information Processing	Membrane transport	mmu02010	ABC transporters	1	578	24	6012	0.00173	0.003992	ENSMUSP00000128401	ENSMUSP00000009058 ENSMUSP00000097743 ENSMUSP00000136343 ENSMUSP00000041204 ENSMUSP00000030010 ENSMUSP00000128401 ENSMUSP00000033695 ENSMUSP00000110729 ENSMUSP00000025197 ENSMUSP00000042186 ENSMUSP00000075011 ENSMUSP00000002084 ENSMUSP00000027396 ENSMUSP00000036338 ENSMUSP00000029770 ENSMUSP00000045285 ENSMUSP00000024829 ENSMUSP00000068940 ENSMUSP00000128121 ENSMUSP00000084805 ENSMUSP00000021666 …	under	0.912039	0.999893	0.0416667
Organismal Systems	Excretory system	mmu04962	Vasopressin-regulated water reabsorption	1	578	24	6012	0.00173	0.003992	ENSMUSP00000101803	ENSMUSP00000018851 ENSMUSP00000099364 ENSMUSP00000109552 ENSMUSP00000107768 ENSMUSP00000102987 ENSMUSP00000110021 ENSMUSP00000026479 ENSMUSP00000085179 ENSMUSP00000101803 ENSMUSP00000129163 ENSMUSP00000035366 ENSMUSP00000005606 ENSMUSP00000107523 ENSMUSP00000099573 ENSMUSP00000000727 ENSMUSP00000033075 ENSMUSP00000017975 ENSMUSP00000045480 ENSMUSP00000153008 ENSMUSP00000020775 ENSMUSP00000009157 …	under	0.912039	0.999893	0.0416667
Human Diseases	Cancer: overview	mmu05203	Viral carcinogenesis	7	578	111	6012	0.012111	0.018463	ENSMUSP00000034834 ENSMUSP00000070993 ENSMUSP00000022894 ENSMUSP00000143631 ENSMUSP00000016672 ENSMUSP00000126024 ENSMUSP00000138108	ENSMUSP00000066068 ENSMUSP00000021554 ENSMUSP00000034834 ENSMUSP00000128770 ENSMUSP00000001460 ENSMUSP00000144561 ENSMUSP00000095433 ENSMUSP00000000804 ENSMUSP00000108011 ENSMUSP00000070993 ENSMUSP00000025649 ENSMUSP00000135647 ENSMUSP00000100075 ENSMUSP00000022894 ENSMUSP00000019109 ENSMUSP00000123605 ENSMUSP00000124382 ENSMUSP00000024988 ENSMUSP00000009036 ENSMUSP00000099842 ENSMUSP00000018470 …	under	0.919663	0.999893	0.0630631
Human Diseases	Infectious disease: viral	mmu05166	Human T-cell leukemia virus 1 infection	6	578	98	6012	0.010381	0.016301	ENSMUSP00000083587 ENSMUSP00000041008 ENSMUSP00000025263 ENSMUSP00000099534 ENSMUSP00000046105 ENSMUSP00000007803	ENSMUSP00000030187 ENSMUSP00000000299 ENSMUSP00000020637 ENSMUSP00000003912 ENSMUSP00000020673 ENSMUSP00000134023 ENSMUSP00000016463 ENSMUSP00000034049 ENSMUSP00000101913 ENSMUSP00000099933 ENSMUSP00000009036 ENSMUSP00000099842 ENSMUSP00000083587 ENSMUSP00000119441 ENSMUSP00000156154 ENSMUSP00000072859 ENSMUSP00000148419 ENSMUSP00000130594 ENSMUSP00000134004 ENSMUSP00000056774 ENSMUSP00000005606 …	under	0.920154	0.999893	0.0612245
Genetic Information Processing	Folding, sorting and degradation	mmu04120	Ubiquitin mediated proteolysis	4	578	71	6012	0.00692	0.01181	ENSMUSP00000055714 ENSMUSP00000112632 ENSMUSP00000054303 ENSMUSP00000099702	ENSMUSP00000086626 ENSMUSP00000025649 ENSMUSP00000031697 ENSMUSP00000147409 ENSMUSP00000140224 ENSMUSP00000035328 ENSMUSP00000110771 ENSMUSP00000026292 ENSMUSP00000034529 ENSMUSP00000130738 ENSMUSP00000035216 ENSMUSP00000136858 ENSMUSP00000099909 ENSMUSP00000125403 ENSMUSP00000099807 ENSMUSP00000016680 ENSMUSP00000139480 ENSMUSP00000040431 ENSMUSP00000143859 ENSMUSP00000146244 ENSMUSP00000151886 …	under	0.920655	0.999893	0.056338
Human Diseases	Cancer: specific types	mmu05225	Hepatocellular carcinoma	4	578	72	6012	0.00692	0.011976	ENSMUSP00000071486 ENSMUSP00000126024 ENSMUSP00000007803 ENSMUSP00000058629	ENSMUSP00000071486 ENSMUSP00000079991 ENSMUSP00000096547 ENSMUSP00000100868 ENSMUSP00000118874 ENSMUSP00000026050 ENSMUSP00000151629 ENSMUSP00000156154 ENSMUSP00000056774 ENSMUSP00000029214 ENSMUSP00000102106 ENSMUSP00000021052 ENSMUSP00000051619 ENSMUSP00000138788 ENSMUSP00000135784 ENSMUSP00000029445 ENSMUSP00000099510 ENSMUSP00000005548 ENSMUSP00000122354 ENSMUSP00000099422 ENSMUSP00000033093 …	under	0.925685	0.999893	0.0555556
Organismal Systems	Endocrine system	mmu04929	GnRH secretion	1	578	26	6012	0.00173	0.004325	ENSMUSP00000105736	ENSMUSP00000156154 ENSMUSP00000025912 ENSMUSP00000056774 ENSMUSP00000025541 ENSMUSP00000049584 ENSMUSP00000051619 ENSMUSP00000038150 ENSMUSP00000138788 ENSMUSP00000029445 ENSMUSP00000136963 ENSMUSP00000043190 ENSMUSP00000104208 ENSMUSP00000035037 ENSMUSP00000107339 ENSMUSP00000026572 ENSMUSP00000101315 ENSMUSP00000005066 ENSMUSP00000108571 ENSMUSP00000099583 ENSMUSP00000103878 ENSMUSP00000084043 …	under	0.928202	0.999893	0.0384615
Environmental Information Processing	Signal transduction	mmu04150	mTOR signaling pathway	4	578	73	6012	0.00692	0.012142	ENSMUSP00000025263 ENSMUSP00000136287 ENSMUSP00000058629 ENSMUSP00000154338	ENSMUSP00000110314 ENSMUSP00000006435 ENSMUSP00000107192 ENSMUSP00000031382 ENSMUSP00000040756 ENSMUSP00000033671 ENSMUSP00000130194 ENSMUSP00000119328 ENSMUSP00000022904 ENSMUSP00000019354 ENSMUSP00000156154 ENSMUSP00000108987 ENSMUSP00000056774 ENSMUSP00000102106 ENSMUSP00000030399 ENSMUSP00000007959 ENSMUSP00000051619 ENSMUSP00000138788 ENSMUSP00000029445 ENSMUSP00000099510 ENSMUSP00000099878 …	under	0.930426	0.999893	0.0547945
Cellular Processes	Transport and catabolism	mmu04137	Mitophagy - animal	2	578	44	6012	0.00346	0.007319	ENSMUSP00000015981 ENSMUSP00000007803	ENSMUSP00000109230 ENSMUSP00000020316 ENSMUSP00000029445 ENSMUSP00000099909 ENSMUSP00000065456 ENSMUSP00000096829 ENSMUSP00000108124 ENSMUSP00000057760 ENSMUSP00000020339 ENSMUSP00000151244 ENSMUSP00000019198 ENSMUSP00000025867 ENSMUSP00000107339 ENSMUSP00000009256 ENSMUSP00000076664 ENSMUSP00000026572 ENSMUSP00000055919 ENSMUSP00000099835 ENSMUSP00000119369 ENSMUSP00000015981 ENSMUSP00000048260 …	under	0.934184	0.999893	0.0454545
Human Diseases	Cancer: specific types	mmu05220	Chronic myeloid leukemia	2	578	44	6012	0.00346	0.007319	ENSMUSP00000126024 ENSMUSP00000007803	ENSMUSP00000156154 ENSMUSP00000056774 ENSMUSP00000102106 ENSMUSP00000099657 ENSMUSP00000051619 ENSMUSP00000102980 ENSMUSP00000102981 ENSMUSP00000029445 ENSMUSP00000029812 ENSMUSP00000017920 ENSMUSP00000078682 ENSMUSP00000058757 ENSMUSP00000033093 ENSMUSP00000146244 ENSMUSP00000002678 ENSMUSP00000130294 ENSMUSP00000035037 ENSMUSP00000025867 ENSMUSP00000126024 ENSMUSP00000107339 ENSMUSP00000033939 …	under	0.934184	0.999893	0.0454545
Human Diseases	Neurodegenerative disease	mmu05014	Amyotrophic lateral sclerosis	17	578	240	6012	0.029412	0.03992	ENSMUSP00000071486 ENSMUSP00000060246 ENSMUSP00000027015 ENSMUSP00000001513 ENSMUSP00000061958 ENSMUSP00000015981 ENSMUSP00000025263 ENSMUSP00000018610 ENSMUSP00000115419 ENSMUSP00000007803 ENSMUSP00000000175 ENSMUSP00000008748 ENSMUSP00000125647 ENSMUSP00000056888 ENSMUSP00000099617 ENSMUSP00000030747 ENSMUSP00000125731	ENSMUSP00000117616 ENSMUSP00000071486 ENSMUSP00000028222 ENSMUSP00000030164 ENSMUSP00000026495 ENSMUSP00000026459 ENSMUSP00000022062 ENSMUSP00000003310 ENSMUSP00000027111 ENSMUSP00000025083 ENSMUSP00000020673 ENSMUSP00000076777 ENSMUSP00000109552 ENSMUSP00000071054 ENSMUSP00000027432 ENSMUSP00000033176 ENSMUSP00000051033 ENSMUSP00000028610 ENSMUSP00000145028 ENSMUSP00000078429 ENSMUSP00000144126 …	under	0.934196	0.999893	0.0708333
Metabolism	Xenobiotics biodegradation and metabolism	mmu00983	Drug metabolism - other enzymes	1	578	27	6012	0.00173	0.004491	ENSMUSP00000020779	ENSMUSP00000024866 ENSMUSP00000026613 ENSMUSP00000020779 ENSMUSP00000118874 ENSMUSP00000029405 ENSMUSP00000026050 ENSMUSP00000030491 ENSMUSP00000058683 ENSMUSP00000026723 ENSMUSP00000023510 ENSMUSP00000079888 ENSMUSP00000024978 ENSMUSP00000080767 ENSMUSP00000112923 ENSMUSP00000129565 ENSMUSP00000050398 ENSMUSP00000001715 ENSMUSP00000053616 ENSMUSP00000028005 ENSMUSP00000004134 ENSMUSP00000091181 …	under	0.935135	0.999893	0.037037
Human Diseases	Cardiovascular disease	mmu05415	Diabetic cardiomyopathy	9	578	141	6012	0.015571	0.023453	ENSMUSP00000113942 ENSMUSP00000004327 ENSMUSP00000080974 ENSMUSP00000061958 ENSMUSP00000031668 ENSMUSP00000115419 ENSMUSP00000000175 ENSMUSP00000015596 ENSMUSP00000105736	ENSMUSP00000026495 ENSMUSP00000026459 ENSMUSP00000135935 ENSMUSP00000022062 ENSMUSP00000027111 ENSMUSP00000113942 ENSMUSP00000020673 ENSMUSP00000121203 ENSMUSP00000134023 ENSMUSP00000004327 ENSMUSP00000140404 ENSMUSP00000027777 ENSMUSP00000016463 ENSMUSP00000033176 ENSMUSP00000015484 ENSMUSP00000034049 ENSMUSP00000033992 ENSMUSP00000107829 ENSMUSP00000009036 ENSMUSP00000026743 ENSMUSP00000033662 …	under	0.935225	0.999893	0.0638298
Human Diseases	Endocrine and metabolic disease	mmu04931	Insulin resistance	2	578	46	6012	0.00346	0.007651	ENSMUSP00000080974 ENSMUSP00000025263	ENSMUSP00000071231 ENSMUSP00000038555 ENSMUSP00000107829 ENSMUSP00000035743 ENSMUSP00000033671 ENSMUSP00000029053 ENSMUSP00000119328 ENSMUSP00000039109 ENSMUSP00000083474 ENSMUSP00000056774 ENSMUSP00000078971 ENSMUSP00000015100 ENSMUSP00000080974 ENSMUSP00000138788 ENSMUSP00000029812 ENSMUSP00000099510 ENSMUSP00000045409 ENSMUSP00000148768 ENSMUSP00000058757 ENSMUSP00000025835 ENSMUSP00000035037 …	under	0.944286	0.999893	0.0434783
Environmental Information Processing	Signal transduction	mmu04014	Ras signaling pathway	4	578	77	6012	0.00692	0.012808	ENSMUSP00000025523 ENSMUSP00000118727 ENSMUSP00000007803 ENSMUSP00000087485	ENSMUSP00000079991 ENSMUSP00000037869 ENSMUSP00000019514 ENSMUSP00000101241 ENSMUSP00000106656 ENSMUSP00000100010 ENSMUSP00000112998 ENSMUSP00000156154 ENSMUSP00000102987 ENSMUSP00000056774 ENSMUSP00000054634 ENSMUSP00000102106 ENSMUSP00000005606 ENSMUSP00000025523 ENSMUSP00000007959 ENSMUSP00000051619 ENSMUSP00000066238 ENSMUSP00000023467 ENSMUSP00000138788 ENSMUSP00000088174 ENSMUSP00000020316 …	under	0.946777	0.999893	0.0519481
Metabolism	Amino acid metabolism	mmu00310	Lysine degradation	1	578	29	6012	0.00173	0.004824	ENSMUSP00000003907	ENSMUSP00000031411 ENSMUSP00000120976 ENSMUSP00000028004 ENSMUSP00000034547 ENSMUSP00000026538 ENSMUSP00000106481 ENSMUSP00000004968 ENSMUSP00000067767 ENSMUSP00000029610 ENSMUSP00000060346 ENSMUSP00000041260 ENSMUSP00000019199 ENSMUSP00000047923 ENSMUSP00000007005 ENSMUSP00000065089 ENSMUSP00000013931 ENSMUSP00000092769 ENSMUSP00000003907 ENSMUSP00000119057 ENSMUSP00000047672 ENSMUSP00000102906 …	under	0.947059	0.999893	0.0344828
Human Diseases	Cancer: specific types	mmu05214	Glioma	1	578	29	6012	0.00173	0.004824	ENSMUSP00000126024	ENSMUSP00000079991 ENSMUSP00000019514 ENSMUSP00000156154 ENSMUSP00000056774 ENSMUSP00000102106 ENSMUSP00000051619 ENSMUSP00000138788 ENSMUSP00000029445 ENSMUSP00000099510 ENSMUSP00000129999 ENSMUSP00000033093 ENSMUSP00000035037 ENSMUSP00000126024 ENSMUSP00000107339 ENSMUSP00000026572 ENSMUSP00000101315 ENSMUSP00000005066 ENSMUSP00000001155 ENSMUSP00000077757 ENSMUSP00000108571 ENSMUSP00000103878 …	under	0.947059	0.999893	0.0344828
Metabolism	Lipid metabolism	mmu00600	Sphingolipid metabolism	1	578	30	6012	0.00173	0.00499	ENSMUSP00000064423	ENSMUSP00000101105 ENSMUSP00000112975 ENSMUSP00000026262 ENSMUSP00000022169 ENSMUSP00000034000 ENSMUSP00000076589 ENSMUSP00000055803 ENSMUSP00000021424 ENSMUSP00000021390 ENSMUSP00000007253 ENSMUSP00000006053 ENSMUSP00000021920 ENSMUSP00000127646 ENSMUSP00000019965 ENSMUSP00000103366 ENSMUSP00000006914 ENSMUSP00000135604 ENSMUSP00000015858 ENSMUSP00000042187 ENSMUSP00000010049 ENSMUSP00000104844 …	under	0.952174	0.999893	0.0333333
Human Diseases	Cancer: specific types	mmu05213	Endometrial cancer	1	578	30	6012	0.00173	0.00499	ENSMUSP00000030747	ENSMUSP00000156154 ENSMUSP00000056774 ENSMUSP00000102106 ENSMUSP00000033182 ENSMUSP00000051619 ENSMUSP00000029445 ENSMUSP00000033093 ENSMUSP00000035037 ENSMUSP00000107339 ENSMUSP00000026572 ENSMUSP00000110398 ENSMUSP00000049007 ENSMUSP00000101315 ENSMUSP00000005066 ENSMUSP00000001155 ENSMUSP00000077757 ENSMUSP00000108571 ENSMUSP00000103878 ENSMUSP00000099991 ENSMUSP00000121111 ENSMUSP00000103981 …	under	0.952174	0.999893	0.0333333
Organismal Systems	Environmental adaptation	mmu04714	Thermogenesis	9	578	149	6012	0.015571	0.024784	ENSMUSP00000071486 ENSMUSP00000061958 ENSMUSP00000115419 ENSMUSP00000000175 ENSMUSP00000136287 ENSMUSP00000017332 ENSMUSP00000023761 ENSMUSP00000154338 ENSMUSP00000053727	ENSMUSP00000071486 ENSMUSP00000026495 ENSMUSP00000026459 ENSMUSP00000022062 ENSMUSP00000027111 ENSMUSP00000096547 ENSMUSP00000033176 ENSMUSP00000100868 ENSMUSP00000034046 ENSMUSP00000108528 ENSMUSP00000033671 ENSMUSP00000026743 ENSMUSP00000046585 ENSMUSP00000042967 ENSMUSP00000010007 ENSMUSP00000119328 ENSMUSP00000027478 ENSMUSP00000034276 ENSMUSP00000110547 ENSMUSP00000113022 ENSMUSP00000102147 …	under	0.957087	0.999893	0.0604027
Organismal Systems	Nervous system	mmu04720	Long-term potentiation	1	578	33	6012	0.00173	0.005489	ENSMUSP00000105736	ENSMUSP00000019514 ENSMUSP00000033671 ENSMUSP00000119328 ENSMUSP00000039109 ENSMUSP00000156154 ENSMUSP00000083474 ENSMUSP00000025912 ENSMUSP00000025541 ENSMUSP00000015100 ENSMUSP00000005606 ENSMUSP00000049584 ENSMUSP00000051619 ENSMUSP00000071040 ENSMUSP00000066238 ENSMUSP00000038150 ENSMUSP00000138788 ENSMUSP00000088174 ENSMUSP00000029445 ENSMUSP00000099573 ENSMUSP00000129999 ENSMUSP00000107339 …	under	0.964743	0.999893	0.030303
Organismal Systems	Nervous system	mmu04721	Synaptic vesicle cycle	1	578	33	6012	0.00173	0.005489	ENSMUSP00000024932	ENSMUSP00000050220 ENSMUSP00000110314 ENSMUSP00000127842 ENSMUSP00000018875 ENSMUSP00000003038 ENSMUSP00000006435 ENSMUSP00000099364 ENSMUSP00000122474 ENSMUSP00000099399 ENSMUSP00000072199 ENSMUSP00000006181 ENSMUSP00000040756 ENSMUSP00000007216 ENSMUSP00000022904 ENSMUSP00000019354 ENSMUSP00000013304 ENSMUSP00000029900 ENSMUSP00000103478 ENSMUSP00000021536 ENSMUSP00000031378 ENSMUSP00000039737 …	under	0.964743	0.999893	0.030303
Organismal Systems	Immune system	mmu04666	Fc gamma R-mediated phagocytosis	3	578	68	6012	0.00519	0.011311	ENSMUSP00000055637 ENSMUSP00000118727 ENSMUSP00000064423	ENSMUSP00000138350 ENSMUSP00000144561 ENSMUSP00000079991 ENSMUSP00000000137 ENSMUSP00000109451 ENSMUSP00000090245 ENSMUSP00000137503 ENSMUSP00000127941 ENSMUSP00000072199 ENSMUSP00000100075 ENSMUSP00000107829 ENSMUSP00000147514 ENSMUSP00000076933 ENSMUSP00000003370 ENSMUSP00000005889 ENSMUSP00000113852 ENSMUSP00000016094 ENSMUSP00000143438 ENSMUSP00000048057 ENSMUSP00000156154 ENSMUSP00000081531 …	under	0.965529	0.999893	0.0441176
Environmental Information Processing	Signal transduction	mmu04070	Phosphatidylinositol signaling system	2	578	52	6012	0.00346	0.008649	ENSMUSP00000111457 ENSMUSP00000105736	ENSMUSP00000079991 ENSMUSP00000127941 ENSMUSP00000019514 ENSMUSP00000036162 ENSMUSP00000048057 ENSMUSP00000025912 ENSMUSP00000056774 ENSMUSP00000113308 ENSMUSP00000049584 ENSMUSP00000068174 ENSMUSP00000038150 ENSMUSP00000138788 ENSMUSP00000006912 ENSMUSP00000018691 ENSMUSP00000106934 ENSMUSP00000038225 ENSMUSP00000035037 ENSMUSP00000102852 ENSMUSP00000099470 ENSMUSP00000126092 ENSMUSP00000101315 …	under	0.966469	0.999893	0.0384615
Human Diseases	Drug resistance: antineoplastic	mmu01521	EGFR tyrosine kinase inhibitor resistance	1	578	35	6012	0.00173	0.005822	ENSMUSP00000007803	ENSMUSP00000079991 ENSMUSP00000099842 ENSMUSP00000156154 ENSMUSP00000056774 ENSMUSP00000102106 ENSMUSP00000051619 ENSMUSP00000138788 ENSMUSP00000029445 ENSMUSP00000099510 ENSMUSP00000099878 ENSMUSP00000033093 ENSMUSP00000035037 ENSMUSP00000107339 ENSMUSP00000026572 ENSMUSP00000110398 ENSMUSP00000101315 ENSMUSP00000029803 ENSMUSP00000120152 ENSMUSP00000005066 ENSMUSP00000071289 ENSMUSP00000105155 …	under	0.97123	0.999893	0.0285714
Genetic Information Processing	Folding, sorting and degradation	mmu03018	RNA degradation	2	578	54	6012	0.00346	0.008982	ENSMUSP00000075513 ENSMUSP00000035179	ENSMUSP00000025217 ENSMUSP00000075513 ENSMUSP00000027123 ENSMUSP00000001809 ENSMUSP00000096073 ENSMUSP00000149620 ENSMUSP00000079070 ENSMUSP00000022281 ENSMUSP00000021614 ENSMUSP00000020756 ENSMUSP00000028921 ENSMUSP00000020522 ENSMUSP00000034981 ENSMUSP00000039134 ENSMUSP00000072620 ENSMUSP00000041906 ENSMUSP00000036265 ENSMUSP00000034539 ENSMUSP00000004378 ENSMUSP00000153521 ENSMUSP00000026891 …	under	0.971757	0.999893	0.037037
Genetic Information Processing	Folding, sorting and degradation	mmu04141	Protein processing in endoplasmic reticulum	6	578	116	6012	0.010381	0.019295	ENSMUSP00000072175 ENSMUSP00000052258 ENSMUSP00000029414 ENSMUSP00000008748 ENSMUSP00000056888 ENSMUSP00000092992	ENSMUSP00000016072 ENSMUSP00000028222 ENSMUSP00000024739 ENSMUSP00000030164 ENSMUSP00000015800 ENSMUSP00000020238 ENSMUSP00000091921 ENSMUSP00000037930 ENSMUSP00000028683 ENSMUSP00000026122 ENSMUSP00000076521 ENSMUSP00000032143 ENSMUSP00000020637 ENSMUSP00000003912 ENSMUSP00000068594 ENSMUSP00000093965 ENSMUSP00000050336 ENSMUSP00000002091 ENSMUSP00000025891 ENSMUSP00000031697 ENSMUSP00000004574 …	under	0.972837	0.999893	0.0517241
Organismal Systems	Aging	mmu04211	Longevity regulating pathway	1	578	39	6012	0.00173	0.006487	ENSMUSP00000154338	ENSMUSP00000028610 ENSMUSP00000130594 ENSMUSP00000056774 ENSMUSP00000007012 ENSMUSP00000005606 ENSMUSP00000029445 ENSMUSP00000029812 ENSMUSP00000099573 ENSMUSP00000099510 ENSMUSP00000042875 ENSMUSP00000033093 ENSMUSP00000035037 ENSMUSP00000025867 ENSMUSP00000088837 ENSMUSP00000107339 ENSMUSP00000026572 ENSMUSP00000101315 ENSMUSP00000044769 ENSMUSP00000132499 ENSMUSP00000029803 ENSMUSP00000026671 …	under	0.980848	0.999893	0.025641
Cellular Processes	Cell motility	mmu04810	Regulation of actin cytoskeleton	5	578	107	6012	0.008651	0.017798	ENSMUSP00000071486 ENSMUSP00000054499 ENSMUSP00000021028 ENSMUSP00000071715 ENSMUSP00000029711	ENSMUSP00000016771 ENSMUSP00000128278 ENSMUSP00000071486 ENSMUSP00000066068 ENSMUSP00000113071 ENSMUSP00000021554 ENSMUSP00000000299 ENSMUSP00000022369 ENSMUSP00000067685 ENSMUSP00000028499 ENSMUSP00000068468 ENSMUSP00000128249 ENSMUSP00000144561 ENSMUSP00000032629 ENSMUSP00000054499 ENSMUSP00000000137 ENSMUSP00000109451 ENSMUSP00000087457 ENSMUSP00000152813 ENSMUSP00000063734 ENSMUSP00000137503 …	under	0.981175	0.999893	0.046729
Organismal Systems	Circulatory system	mmu04270	Vascular smooth muscle contraction	1	578	41	6012	0.00173	0.00682	ENSMUSP00000105736	ENSMUSP00000016771 ENSMUSP00000152813 ENSMUSP00000096280 ENSMUSP00000107829 ENSMUSP00000019514 ENSMUSP00000020930 ENSMUSP00000151915 ENSMUSP00000039109 ENSMUSP00000156154 ENSMUSP00000069549 ENSMUSP00000083474 ENSMUSP00000130594 ENSMUSP00000085179 ENSMUSP00000025912 ENSMUSP00000025541 ENSMUSP00000015100 ENSMUSP00000005606 ENSMUSP00000007959 ENSMUSP00000049584 ENSMUSP00000051619 ENSMUSP00000038150 …	under	0.984376	0.999893	0.0243902
Environmental Information Processing	Signal transduction	mmu04024	cAMP signaling pathway	2	578	62	6012	0.00346	0.010313	ENSMUSP00000083077 ENSMUSP00000118727	ENSMUSP00000039657 ENSMUSP00000099922 ENSMUSP00000020107 ENSMUSP00000135935 ENSMUSP00000083077 ENSMUSP00000152813 ENSMUSP00000142326 ENSMUSP00000019514 ENSMUSP00000005889 ENSMUSP00000021142 ENSMUSP00000039109 ENSMUSP00000000001 ENSMUSP00000156154 ENSMUSP00000069549 ENSMUSP00000083474 ENSMUSP00000130594 ENSMUSP00000085179 ENSMUSP00000063412 ENSMUSP00000056774 ENSMUSP00000015100 ENSMUSP00000005606 …	under	0.985927	0.999893	0.0322581
Human Diseases	Cancer: specific types	mmu05210	Colorectal cancer	1	578	43	6012	0.00173	0.007152	ENSMUSP00000030747	ENSMUSP00000156154 ENSMUSP00000056774 ENSMUSP00000102106 ENSMUSP00000007959 ENSMUSP00000051619 ENSMUSP00000029445 ENSMUSP00000098058 ENSMUSP00000099510 ENSMUSP00000042875 ENSMUSP00000033093 ENSMUSP00000002678 ENSMUSP00000035037 ENSMUSP00000107339 ENSMUSP00000026572 ENSMUSP00000110398 ENSMUSP00000036384 ENSMUSP00000004565 ENSMUSP00000101315 ENSMUSP00000009003 ENSMUSP00000005066 ENSMUSP00000025393 …	under	0.987255	0.999893	0.0232558
Human Diseases	Neurodegenerative disease	mmu05012	Parkinson disease	9	578	175	6012	0.015571	0.029108	ENSMUSP00000060246 ENSMUSP00000001513 ENSMUSP00000030051 ENSMUSP00000115419 ENSMUSP00000007803 ENSMUSP00000000175 ENSMUSP00000126067 ENSMUSP00000099702 ENSMUSP00000030747	ENSMUSP00000028222 ENSMUSP00000026495 ENSMUSP00000026459 ENSMUSP00000022062 ENSMUSP00000086626 ENSMUSP00000027111 ENSMUSP00000025083 ENSMUSP00000020673 ENSMUSP00000134023 ENSMUSP00000076777 ENSMUSP00000071054 ENSMUSP00000016463 ENSMUSP00000027432 ENSMUSP00000033176 ENSMUSP00000051033 ENSMUSP00000078429 ENSMUSP00000007212 ENSMUSP00000001566 ENSMUSP00000142326 ENSMUSP00000060246 ENSMUSP00000034049 …	under	0.990099	0.999893	0.0514286
Metabolism	Energy metabolism	mmu00190	Oxidative phosphorylation	4	578	102	6012	0.00692	0.016966	ENSMUSP00000024932 ENSMUSP00000115419 ENSMUSP00000033241 ENSMUSP00000000175	ENSMUSP00000026495 ENSMUSP00000026459 ENSMUSP00000110314 ENSMUSP00000022062 ENSMUSP00000027111 ENSMUSP00000006435 ENSMUSP00000122474 ENSMUSP00000099399 ENSMUSP00000033176 ENSMUSP00000040756 ENSMUSP00000026743 ENSMUSP00000042967 ENSMUSP00000010007 ENSMUSP00000027478 ENSMUSP00000022904 ENSMUSP00000034276 ENSMUSP00000110547 ENSMUSP00000113022 ENSMUSP00000019354 ENSMUSP00000013304 ENSMUSP00000102147 …	under	0.991204	0.999893	0.0392157
Environmental Information Processing	Signal transduction	mmu04068	FoxO signaling pathway	1	578	51	6012	0.00173	0.008483	ENSMUSP00000061958	ENSMUSP00000028610 ENSMUSP00000038555 ENSMUSP00000124382 ENSMUSP00000156154 ENSMUSP00000056774 ENSMUSP00000102106 ENSMUSP00000103474 ENSMUSP00000007012 ENSMUSP00000051619 ENSMUSP00000029445 ENSMUSP00000018353 ENSMUSP00000002678 ENSMUSP00000035037 ENSMUSP00000061958 ENSMUSP00000088837 ENSMUSP00000107339 ENSMUSP00000033939 ENSMUSP00000026572 ENSMUSP00000101315 ENSMUSP00000132499 ENSMUSP00000023165 …	under	0.99436	0.999893	0.0196078
Human Diseases	Substance dependence	mmu05034	Alcoholism	1	578	51	6012	0.00173	0.008483	ENSMUSP00000087485	ENSMUSP00000016081 ENSMUSP00000142326 ENSMUSP00000019514 ENSMUSP00000101241 ENSMUSP00000085006 ENSMUSP00000106099 ENSMUSP00000078239 ENSMUSP00000106656 ENSMUSP00000026013 ENSMUSP00000039109 ENSMUSP00000000001 ENSMUSP00000156154 ENSMUSP00000083474 ENSMUSP00000085179 ENSMUSP00000102106 ENSMUSP00000088287 ENSMUSP00000015100 ENSMUSP00000005606 ENSMUSP00000099657 ENSMUSP00000051619 ENSMUSP00000029445 …	under	0.99436	0.999893	0.0196078
Genetic Information Processing	Translation	mmu03008	Ribosome biogenesis in eukaryotes	1	578	52	6012	0.00173	0.008649	ENSMUSP00000025714	ENSMUSP00000099933 ENSMUSP00000140250 ENSMUSP00000099487 ENSMUSP00000037613 ENSMUSP00000028608 ENSMUSP00000028921 ENSMUSP00000010241 ENSMUSP00000054084 ENSMUSP00000034981 ENSMUSP00000031383 ENSMUSP00000096829 ENSMUSP00000033776 ENSMUSP00000135639 ENSMUSP00000026387 ENSMUSP00000055919 ENSMUSP00000034524 ENSMUSP00000091840 ENSMUSP00000047119 ENSMUSP00000048204 ENSMUSP00000068103 ENSMUSP00000071569 …	under	0.994907	0.999893	0.0192308
Organismal Systems	Endocrine system	mmu04910	Insulin signaling pathway	2	578	74	6012	0.00346	0.012309	ENSMUSP00000154338 ENSMUSP00000026617	ENSMUSP00000052872 ENSMUSP00000097282 ENSMUSP00000000642 ENSMUSP00000051215 ENSMUSP00000071231 ENSMUSP00000038555 ENSMUSP00000019514 ENSMUSP00000035743 ENSMUSP00000029053 ENSMUSP00000048057 ENSMUSP00000039109 ENSMUSP00000156154 ENSMUSP00000083474 ENSMUSP00000056774 ENSMUSP00000102106 ENSMUSP00000015100 ENSMUSP00000005606 ENSMUSP00000102288 ENSMUSP00000051619 ENSMUSP00000072136 ENSMUSP00000029445 …	under	0.995173	0.999893	0.027027
Human Diseases	Neurodegenerative disease	mmu05016	Huntington disease	9	578	193	6012	0.015571	0.032102	ENSMUSP00000099411 ENSMUSP00000060246 ENSMUSP00000001513 ENSMUSP00000115419 ENSMUSP00000000175 ENSMUSP00000019882 ENSMUSP00000038610 ENSMUSP00000030747 ENSMUSP00000105736	ENSMUSP00000050220 ENSMUSP00000026495 ENSMUSP00000026459 ENSMUSP00000127842 ENSMUSP00000022062 ENSMUSP00000018875 ENSMUSP00000059033 ENSMUSP00000003038 ENSMUSP00000027111 ENSMUSP00000025083 ENSMUSP00000020673 ENSMUSP00000099411 ENSMUSP00000134023 ENSMUSP00000076777 ENSMUSP00000109552 ENSMUSP00000071054 ENSMUSP00000016463 ENSMUSP00000027432 ENSMUSP00000033176 ENSMUSP00000051033 ENSMUSP00000078429 …	under	0.996747	0.999893	0.0466321
Human Diseases	Cancer: overview	mmu05207	Chemical carcinogenesis - receptor activation	1	578	61	6012	0.00173	0.010146	ENSMUSP00000031741	ENSMUSP00000024739 ENSMUSP00000020238 ENSMUSP00000091921 ENSMUSP00000142326 ENSMUSP00000001479 ENSMUSP00000033671 ENSMUSP00000119328 ENSMUSP00000118874 ENSMUSP00000047551 ENSMUSP00000026050 ENSMUSP00000000001 ENSMUSP00000156154 ENSMUSP00000130594 ENSMUSP00000085179 ENSMUSP00000056774 ENSMUSP00000102106 ENSMUSP00000078741 ENSMUSP00000005606 ENSMUSP00000051619 ENSMUSP00000102980 ENSMUSP00000138788 …	under	0.997968	0.999893	0.0163934
Human Diseases	Neurodegenerative disease	mmu05017	Spinocerebellar ataxia	2	578	84	6012	0.00346	0.013972	ENSMUSP00000125647 ENSMUSP00000105736	ENSMUSP00000135935 ENSMUSP00000020673 ENSMUSP00000134023 ENSMUSP00000071054 ENSMUSP00000016463 ENSMUSP00000027432 ENSMUSP00000007212 ENSMUSP00000123880 ENSMUSP00000034049 ENSMUSP00000021049 ENSMUSP00000009036 ENSMUSP00000021063 ENSMUSP00000025408 ENSMUSP00000017365 ENSMUSP00000021142 ENSMUSP00000021412 ENSMUSP00000034848 ENSMUSP00000029082 ENSMUSP00000133571 ENSMUSP00000033008 ENSMUSP00000099487 …	under	0.998057	0.999893	0.0238095
Human Diseases	Cancer: overview	mmu05208	Chemical carcinogenesis - reactive oxygen species	5	578	144	6012	0.008651	0.023952	ENSMUSP00000030455 ENSMUSP00000061958 ENSMUSP00000118727 ENSMUSP00000115419 ENSMUSP00000000175	ENSMUSP00000026495 ENSMUSP00000026459 ENSMUSP00000022062 ENSMUSP00000027111 ENSMUSP00000020673 ENSMUSP00000134023 ENSMUSP00000140404 ENSMUSP00000016463 ENSMUSP00000033176 ENSMUSP00000028610 ENSMUSP00000034049 ENSMUSP00000107829 ENSMUSP00000009036 ENSMUSP00000026743 ENSMUSP00000129592 ENSMUSP00000029053 ENSMUSP00000016094 ENSMUSP00000042967 ENSMUSP00000010007 ENSMUSP00000030455 ENSMUSP00000027478 …	under	0.998736	0.999893	0.0347222
Cellular Processes	Transport and catabolism	mmu04144	Endocytosis	6	578	163	6012	0.010381	0.027112	ENSMUSP00000091692 ENSMUSP00000118727 ENSMUSP00000119829 ENSMUSP00000034713 ENSMUSP00000007799 ENSMUSP00000034272	ENSMUSP00000050220 ENSMUSP00000061493 ENSMUSP00000015800 ENSMUSP00000127842 ENSMUSP00000018875 ENSMUSP00000003038 ENSMUSP00000035086 ENSMUSP00000025083 ENSMUSP00000000137 ENSMUSP00000109451 ENSMUSP00000137503 ENSMUSP00000023486 ENSMUSP00000030518 ENSMUSP00000022976 ENSMUSP00000102381 ENSMUSP00000034131 ENSMUSP00000072199 ENSMUSP00000109230 ENSMUSP00000028755 ENSMUSP00000039243 ENSMUSP00000104173 …	under	0.998945	0.999893	0.0368098
Cellular Processes	Cellular community - eukaryotes	mmu04530	Tight junction	1	578	69	6012	0.00173	0.011477	ENSMUSP00000071486	ENSMUSP00000016771 ENSMUSP00000071486 ENSMUSP00000066068 ENSMUSP00000113071 ENSMUSP00000021554 ENSMUSP00000020630 ENSMUSP00000128249 ENSMUSP00000000137 ENSMUSP00000109451 ENSMUSP00000087457 ENSMUSP00000076777 ENSMUSP00000152813 ENSMUSP00000063734 ENSMUSP00000137503 ENSMUSP00000051033 ENSMUSP00000078429 ENSMUSP00000076933 ENSMUSP00000007708 ENSMUSP00000151915 ENSMUSP00000041857 ENSMUSP00000143438 …	under	0.999103	0.999893	0.0144928
Cellular Processes	Transport and catabolism	mmu04142	Lysosome	2	578	105	6012	0.00346	0.017465	ENSMUSP00000024932 ENSMUSP00000021338	ENSMUSP00000050220 ENSMUSP00000101105 ENSMUSP00000009234 ENSMUSP00000034121 ENSMUSP00000022196 ENSMUSP00000121203 ENSMUSP00000122474 ENSMUSP00000026262 ENSMUSP00000026613 ENSMUSP00000099399 ENSMUSP00000006235 ENSMUSP00000001802 ENSMUSP00000099381 ENSMUSP00000015667 ENSMUSP00000022169 ENSMUSP00000034000 ENSMUSP00000029814 ENSMUSP00000040756 ENSMUSP00000003117 ENSMUSP00000043167 ENSMUSP00000016400 …	under	0.999724	0.999893	0.0190476
Genetic Information Processing	Transcription	mmu03040	Spliceosome	2	578	115	6012	0.00346	0.019128	ENSMUSP00000061474 ENSMUSP00000086987	ENSMUSP00000015800 ENSMUSP00000018449 ENSMUSP00000099509 ENSMUSP00000021062 ENSMUSP00000021306 ENSMUSP00000045073 ENSMUSP00000031061 ENSMUSP00000153328 ENSMUSP00000047571 ENSMUSP00000027127 ENSMUSP00000107595 ENSMUSP00000121340 ENSMUSP00000135647 ENSMUSP00000026667 ENSMUSP00000107237 ENSMUSP00000054863 ENSMUSP00000048470 ENSMUSP00000075655 ENSMUSP00000103553 ENSMUSP00000003450 ENSMUSP00000025774 …	under	0.999893	0.999893	0.0173913

## Sheet: C_VS_B_Enrichment
Level1	Level2	Map_ID	Map_Name	Test	TestAll	Ref	RefAll	Test_per	Ref_per	Test_Seq	Ref_Seq	Over_Under	P value	FDR	richFactor
Human Diseases	Infectious disease: viral	mmu05171	Coronavirus disease - COVID-19	25	445	140	6012	0.05618	0.023287	ENSMUSP00000141132 ENSMUSP00000080854 ENSMUSP00000042433 ENSMUSP00000099909 ENSMUSP00000151586 ENSMUSP00000099878 ENSMUSP00000099541 ENSMUSP00000003521 ENSMUSP00000000756 ENSMUSP00000147816 ENSMUSP00000123410 ENSMUSP00000152944 ENSMUSP00000079163 ENSMUSP00000017548 ENSMUSP00000083722 ENSMUSP00000106250 ENSMUSP00000134615 ENSMUSP00000079340 ENSMUSP00000150354 ENSMUSP00000082548 ENSMUSP00000141648 …	ENSMUSP00000079991 ENSMUSP00000080354 ENSMUSP00000034966 ENSMUSP00000015484 ENSMUSP00000032998 ENSMUSP00000024988 ENSMUSP00000141132 ENSMUSP00000099842 ENSMUSP00000029722 ENSMUSP00000113852 ENSMUSP00000099962 ENSMUSP00000107787 ENSMUSP00000092502 ENSMUSP00000048667 ENSMUSP00000028259 ENSMUSP00000156154 ENSMUSP00000031617 ENSMUSP00000033683 ENSMUSP00000071616 ENSMUSP00000083705 ENSMUSP00000080854 …	over	2.72995e-05	0.00728897	0.178571
Genetic Information Processing	Translation	mmu03010	Ribosome	20	445	113	6012	0.044944	0.018796	ENSMUSP00000080854 ENSMUSP00000099909 ENSMUSP00000151586 ENSMUSP00000099878 ENSMUSP00000099541 ENSMUSP00000003521 ENSMUSP00000000756 ENSMUSP00000147816 ENSMUSP00000123410 ENSMUSP00000152944 ENSMUSP00000079163 ENSMUSP00000017548 ENSMUSP00000083722 ENSMUSP00000106250 ENSMUSP00000134615 ENSMUSP00000079340 ENSMUSP00000102213 ENSMUSP00000079672 ENSMUSP00000027256 ENSMUSP00000001485	ENSMUSP00000080354 ENSMUSP00000034966 ENSMUSP00000032998 ENSMUSP00000029722 ENSMUSP00000099962 ENSMUSP00000092502 ENSMUSP00000031617 ENSMUSP00000033683 ENSMUSP00000071616 ENSMUSP00000083705 ENSMUSP00000080854 ENSMUSP00000104068 ENSMUSP00000117461 ENSMUSP00000006496 ENSMUSP00000035105 ENSMUSP00000099757 ENSMUSP00000109399 ENSMUSP00000048469 ENSMUSP00000032597 ENSMUSP00000008812 ENSMUSP00000081474 …	over	0.000196344	0.0223808	0.176991
Human Diseases	Infectious disease: bacterial	mmu05150	Staphylococcus aureus infection	10	445	37	6012	0.022472	0.006154	ENSMUSP00000007275 ENSMUSP00000007318 ENSMUSP00000018399 ENSMUSP00000041008 ENSMUSP00000099416 ENSMUSP00000046105 ENSMUSP00000141648 ENSMUSP00000048836 ENSMUSP00000017741 ENSMUSP00000076026	ENSMUSP00000000299 ENSMUSP00000068468 ENSMUSP00000007272 ENSMUSP00000079699 ENSMUSP00000024988 ENSMUSP00000101913 ENSMUSP00000099420 ENSMUSP00000083587 ENSMUSP00000007280 ENSMUSP00000017270 ENSMUSP00000007275 ENSMUSP00000029748 ENSMUSP00000007318 ENSMUSP00000007317 ENSMUSP00000018399 ENSMUSP00000079882 ENSMUSP00000027966 ENSMUSP00000041008 ENSMUSP00000131938 ENSMUSP00000103039 ENSMUSP00000099416 …	over	0.00025147	0.0223808	0.27027
Human Diseases	Immune disease	mmu05310	Asthma	4	445	7	6012	0.008989	0.001164	ENSMUSP00000050497 ENSMUSP00000028467 ENSMUSP00000041008 ENSMUSP00000046105	ENSMUSP00000050497 ENSMUSP00000017799 ENSMUSP00000028467 ENSMUSP00000041008 ENSMUSP00000025263 ENSMUSP00000078875 ENSMUSP00000046105	over	0.000865665	0.0577831	0.571429
Human Diseases	Infectious disease: parasitic	mmu05146	Amoebiasis	10	445	51	6012	0.022472	0.008483	ENSMUSP00000114159 ENSMUSP00000017188 ENSMUSP00000000727 ENSMUSP00000001547 ENSMUSP00000031668 ENSMUSP00000031327 ENSMUSP00000025602 ENSMUSP00000015583 ENSMUSP00000049175 ENSMUSP00000105736	ENSMUSP00000066068 ENSMUSP00000021554 ENSMUSP00000000299 ENSMUSP00000022369 ENSMUSP00000068468 ENSMUSP00000054499 ENSMUSP00000109230 ENSMUSP00000114159 ENSMUSP00000017188 ENSMUSP00000030454 ENSMUSP00000102987 ENSMUSP00000085179 ENSMUSP00000025912 ENSMUSP00000056774 ENSMUSP00000056669 ENSMUSP00000021550 ENSMUSP00000025541 ENSMUSP00000005606 ENSMUSP00000138788 ENSMUSP00000065456 ENSMUSP00000029812 …	over	0.00361801	0.193202	0.196078
Organismal Systems	Immune system	mmu04621	NOD-like receptor signaling pathway	14	445	102	6012	0.031461	0.016966	ENSMUSP00000070993 ENSMUSP00000020886 ENSMUSP00000141132 ENSMUSP00000106845 ENSMUSP00000132435 ENSMUSP00000020312 ENSMUSP00000030051 ENSMUSP00000150354 ENSMUSP00000031327 ENSMUSP00000101829 ENSMUSP00000022830 ENSMUSP00000033394 ENSMUSP00000026571 ENSMUSP00000105736	ENSMUSP00000024739 ENSMUSP00000091921 ENSMUSP00000020673 ENSMUSP00000134023 ENSMUSP00000006235 ENSMUSP00000070993 ENSMUSP00000015484 ENSMUSP00000018651 ENSMUSP00000107829 ENSMUSP00000009036 ENSMUSP00000020886 ENSMUSP00000141132 ENSMUSP00000099842 ENSMUSP00000155155 ENSMUSP00000106845 ENSMUSP00000156154 ENSMUSP00000116235 ENSMUSP00000098303 ENSMUSP00000025912 ENSMUSP00000079198 ENSMUSP00000140536 …	over	0.0173986	0.774237	0.137255
Human Diseases	Immune disease	mmu05321	Inflammatory bowel disease	4	445	16	6012	0.008989	0.002661	ENSMUSP00000141132 ENSMUSP00000041008 ENSMUSP00000046105 ENSMUSP00000028882	ENSMUSP00000141132 ENSMUSP00000029812 ENSMUSP00000029623 ENSMUSP00000002678 ENSMUSP00000089708 ENSMUSP00000025867 ENSMUSP00000041008 ENSMUSP00000025263 ENSMUSP00000120152 ENSMUSP00000028881 ENSMUSP00000046105 ENSMUSP00000028882 ENSMUSP00000067704 ENSMUSP00000020188 ENSMUSP00000130115 ENSMUSP00000129001	over	0.0263774	0.780237	0.25
Environmental Information Processing	Signal transduction	mmu04020	Calcium signaling pathway	8	445	51	6012	0.017978	0.008483	ENSMUSP00000020312 ENSMUSP00000022419 ENSMUSP00000025602 ENSMUSP00000004683 ENSMUSP00000042188 ENSMUSP00000049175 ENSMUSP00000069851 ENSMUSP00000105736	ENSMUSP00000020107 ENSMUSP00000135935 ENSMUSP00000079991 ENSMUSP00000020673 ENSMUSP00000134023 ENSMUSP00000016463 ENSMUSP00000022622 ENSMUSP00000034049 ENSMUSP00000019514 ENSMUSP00000009036 ENSMUSP00000021142 ENSMUSP00000077273 ENSMUSP00000031429 ENSMUSP00000130594 ENSMUSP00000098303 ENSMUSP00000085179 ENSMUSP00000025912 ENSMUSP00000025541 ENSMUSP00000005606 ENSMUSP00000049584 ENSMUSP00000071040 …	over	0.0321989	0.780237	0.156863
Human Diseases	Infectious disease: bacterial	mmu05152	Tuberculosis	12	445	90	6012	0.026966	0.01497	ENSMUSP00000033053 ENSMUSP00000141132 ENSMUSP00000029900 ENSMUSP00000000727 ENSMUSP00000095171 ENSMUSP00000041008 ENSMUSP00000066789 ENSMUSP00000046105 ENSMUSP00000028882 ENSMUSP00000033394 ENSMUSP00000030747 ENSMUSP00000125731	ENSMUSP00000061493 ENSMUSP00000000299 ENSMUSP00000025217 ENSMUSP00000028045 ENSMUSP00000027123 ENSMUSP00000068468 ENSMUSP00000121203 ENSMUSP00000122474 ENSMUSP00000099399 ENSMUSP00000101972 ENSMUSP00000109230 ENSMUSP00000033053 ENSMUSP00000015667 ENSMUSP00000040756 ENSMUSP00000019514 ENSMUSP00000024988 ENSMUSP00000141132 ENSMUSP00000099842 ENSMUSP00000113852 ENSMUSP00000013304 ENSMUSP00000156154 …	over	0.0324563	0.780237	0.133333
Human Diseases	Infectious disease: viral	mmu05164	Influenza A	12	445	90	6012	0.026966	0.01497	ENSMUSP00000141132 ENSMUSP00000042433 ENSMUSP00000142770 ENSMUSP00000041008 ENSMUSP00000150354 ENSMUSP00000066789 ENSMUSP00000046105 ENSMUSP00000028882 ENSMUSP00000033394 ENSMUSP00000026571 ENSMUSP00000030747 ENSMUSP00000125731	ENSMUSP00000071486 ENSMUSP00000020673 ENSMUSP00000016463 ENSMUSP00000034049 ENSMUSP00000099933 ENSMUSP00000148115 ENSMUSP00000141132 ENSMUSP00000071214 ENSMUSP00000099842 ENSMUSP00000107787 ENSMUSP00000083587 ENSMUSP00000028259 ENSMUSP00000156154 ENSMUSP00000022734 ENSMUSP00000110021 ENSMUSP00000056774 ENSMUSP00000129163 ENSMUSP00000079198 ENSMUSP00000010241 ENSMUSP00000125291 ENSMUSP00000042433 …	over	0.0324563	0.780237	0.133333
Cellular Processes	Cell growth and death	mmu04217	Necroptosis	11	445	81	6012	0.024719	0.013473	ENSMUSP00000141132 ENSMUSP00000117987 ENSMUSP00000147285 ENSMUSP00000150354 ENSMUSP00000004965 ENSMUSP00000022830 ENSMUSP00000028882 ENSMUSP00000047700 ENSMUSP00000029018 ENSMUSP00000033394 ENSMUSP00000125731	ENSMUSP00000024739 ENSMUSP00000091921 ENSMUSP00000022322 ENSMUSP00000020673 ENSMUSP00000134023 ENSMUSP00000027777 ENSMUSP00000016463 ENSMUSP00000025891 ENSMUSP00000041104 ENSMUSP00000071231 ENSMUSP00000015484 ENSMUSP00000016081 ENSMUSP00000034049 ENSMUSP00000035743 ENSMUSP00000009036 ENSMUSP00000141132 ENSMUSP00000099842 ENSMUSP00000068895 ENSMUSP00000155155 ENSMUSP00000108356 ENSMUSP00000029382 …	over	0.0352204	0.780237	0.135802
Human Diseases	Infectious disease: viral	mmu05160	Hepatitis C	11	445	81	6012	0.024719	0.013473	ENSMUSP00000070993 ENSMUSP00000022894 ENSMUSP00000019109 ENSMUSP00000141132 ENSMUSP00000042433 ENSMUSP00000093816 ENSMUSP00000150354 ENSMUSP00000033394 ENSMUSP00000026571 ENSMUSP00000030747 ENSMUSP00000125731	ENSMUSP00000070993 ENSMUSP00000022894 ENSMUSP00000019109 ENSMUSP00000123605 ENSMUSP00000099888 ENSMUSP00000141132 ENSMUSP00000071214 ENSMUSP00000099842 ENSMUSP00000007708 ENSMUSP00000018470 ENSMUSP00000022960 ENSMUSP00000143631 ENSMUSP00000156154 ENSMUSP00000056774 ENSMUSP00000020608 ENSMUSP00000079198 ENSMUSP00000102106 ENSMUSP00000125291 ENSMUSP00000009774 ENSMUSP00000042433 ENSMUSP00000051619 …	over	0.0352204	0.780237	0.135802
Cellular Processes	Transport and catabolism	mmu04145	Phagosome	12	445	93	6012	0.026966	0.015469	ENSMUSP00000076777 ENSMUSP00000060246 ENSMUSP00000042342 ENSMUSP00000020779 ENSMUSP00000029900 ENSMUSP00000021028 ENSMUSP00000000727 ENSMUSP00000001513 ENSMUSP00000041008 ENSMUSP00000048770 ENSMUSP00000046105 ENSMUSP00000044903	ENSMUSP00000018851 ENSMUSP00000061493 ENSMUSP00000071486 ENSMUSP00000000299 ENSMUSP00000028045 ENSMUSP00000110314 ENSMUSP00000028499 ENSMUSP00000068468 ENSMUSP00000020637 ENSMUSP00000003912 ENSMUSP00000006435 ENSMUSP00000122474 ENSMUSP00000087457 ENSMUSP00000076777 ENSMUSP00000023486 ENSMUSP00000099399 ENSMUSP00000140404 ENSMUSP00000101972 ENSMUSP00000051033 ENSMUSP00000109230 ENSMUSP00000078429 …	over	0.0404716	0.780237	0.129032
		mmu01232	Nucleotide metabolism	7	445	44	6012	0.01573	0.007319	ENSMUSP00000043926 ENSMUSP00000020969 ENSMUSP00000030491 ENSMUSP00000084882 ENSMUSP00000059173 ENSMUSP00000090360 ENSMUSP00000035179	ENSMUSP00000024866 ENSMUSP00000043926 ENSMUSP00000025696 ENSMUSP00000020969 ENSMUSP00000029405 ENSMUSP00000030583 ENSMUSP00000114273 ENSMUSP00000030491 ENSMUSP00000031793 ENSMUSP00000017841 ENSMUSP00000002397 ENSMUSP00000149655 ENSMUSP00000016105 ENSMUSP00000026723 ENSMUSP00000107920 ENSMUSP00000023043 ENSMUSP00000047665 ENSMUSP00000079888 ENSMUSP00000116285 ENSMUSP00000024978 ENSMUSP00000006764 …	over	0.0409113	0.780237	0.159091
Human Diseases	Immune disease	mmu05323	Rheumatoid arthritis	6	445	36	6012	0.013483	0.005988	ENSMUSP00000029900 ENSMUSP00000041008 ENSMUSP00000048770 ENSMUSP00000046105 ENSMUSP00000031327 ENSMUSP00000028882	ENSMUSP00000000299 ENSMUSP00000110314 ENSMUSP00000006435 ENSMUSP00000122474 ENSMUSP00000099399 ENSMUSP00000040756 ENSMUSP00000101913 ENSMUSP00000022904 ENSMUSP00000083587 ENSMUSP00000019354 ENSMUSP00000013304 ENSMUSP00000152169 ENSMUSP00000029900 ENSMUSP00000029623 ENSMUSP00000002678 ENSMUSP00000021536 ENSMUSP00000039737 ENSMUSP00000024932 ENSMUSP00000027165 ENSMUSP00000019231 ENSMUSP00000041008 …	over	0.0464572	0.786895	0.166667
Metabolism	Glycan biosynthesis and metabolism	mmu00514	Other types of O-glycan biosynthesis	4	445	19	6012	0.008989	0.00316	ENSMUSP00000004968 ENSMUSP00000030121 ENSMUSP00000036240 ENSMUSP00000059224	ENSMUSP00000034021 ENSMUSP00000034458 ENSMUSP00000004968 ENSMUSP00000045409 ENSMUSP00000038166 ENSMUSP00000047923 ENSMUSP00000000430 ENSMUSP00000125315 ENSMUSP00000020493 ENSMUSP00000097972 ENSMUSP00000053122 ENSMUSP00000061610 ENSMUSP00000050246 ENSMUSP00000123848 ENSMUSP00000081947 ENSMUSP00000047931 ENSMUSP00000030121 ENSMUSP00000036240 ENSMUSP00000059224	over	0.0471555	0.786895	0.210526
Metabolism	Amino acid metabolism	mmu00340	Histidine metabolism	3	445	12	6012	0.006742	0.001996	ENSMUSP00000025546 ENSMUSP00000123336 ENSMUSP00000040550	ENSMUSP00000031411 ENSMUSP00000025546 ENSMUSP00000123336 ENSMUSP00000028004 ENSMUSP00000026013 ENSMUSP00000056276 ENSMUSP00000067767 ENSMUSP00000041260 ENSMUSP00000062747 ENSMUSP00000065089 ENSMUSP00000040550 ENSMUSP00000025632	over	0.0536371	0.786895	0.25
Organismal Systems	Immune system	mmu04658	Th1 and Th2 cell differentiation	5	445	29	6012	0.011236	0.004824	ENSMUSP00000141132 ENSMUSP00000041008 ENSMUSP00000150354 ENSMUSP00000046105 ENSMUSP00000074198	ENSMUSP00000141132 ENSMUSP00000099842 ENSMUSP00000156154 ENSMUSP00000078741 ENSMUSP00000051619 ENSMUSP00000071040 ENSMUSP00000102980 ENSMUSP00000102981 ENSMUSP00000029812 ENSMUSP00000089708 ENSMUSP00000061958 ENSMUSP00000025867 ENSMUSP00000033939 ENSMUSP00000004330 ENSMUSP00000125722 ENSMUSP00000041008 ENSMUSP00000028288 ENSMUSP00000099944 ENSMUSP00000150354 ENSMUSP00000046105 ENSMUSP00000040694 …	over	0.0589783	0.786895	0.172414
Human Diseases	Infectious disease: viral	mmu05167	Kaposi sarcoma-associated herpesvirus infection	12	445	101	6012	0.026966	0.0168	ENSMUSP00000141132 ENSMUSP00000099909 ENSMUSP00000121127 ENSMUSP00000053822 ENSMUSP00000150354 ENSMUSP00000066789 ENSMUSP00000031327 ENSMUSP00000074198 ENSMUSP00000033394 ENSMUSP00000026571 ENSMUSP00000030747 ENSMUSP00000125731	ENSMUSP00000079991 ENSMUSP00000100075 ENSMUSP00000019514 ENSMUSP00000024988 ENSMUSP00000101241 ENSMUSP00000141132 ENSMUSP00000099842 ENSMUSP00000003370 ENSMUSP00000106656 ENSMUSP00000113852 ENSMUSP00000083587 ENSMUSP00000037180 ENSMUSP00000156154 ENSMUSP00000134004 ENSMUSP00000056774 ENSMUSP00000049584 ENSMUSP00000051619 ENSMUSP00000071040 ENSMUSP00000038150 ENSMUSP00000020316 ENSMUSP00000029445 …	over	0.0683625	0.786895	0.118812
Cellular Processes	Cell growth and death	mmu04115	p53 signaling pathway	4	445	22	6012	0.008989	0.003659	ENSMUSP00000050374 ENSMUSP00000044903 ENSMUSP00000030747 ENSMUSP00000125731	ENSMUSP00000108262 ENSMUSP00000125291 ENSMUSP00000140546 ENSMUSP00000033093 ENSMUSP00000126024 ENSMUSP00000050374 ENSMUSP00000147767 ENSMUSP00000097287 ENSMUSP00000078998 ENSMUSP00000026416 ENSMUSP00000039586 ENSMUSP00000007803 ENSMUSP00000044903 ENSMUSP00000020099 ENSMUSP00000006911 ENSMUSP00000013807 ENSMUSP00000154338 ENSMUSP00000002152 ENSMUSP00000066679 ENSMUSP00000030747 ENSMUSP00000076160 …	over	0.07483	0.786895	0.181818
Organismal Systems	Immune system	mmu04640	Hematopoietic cell lineage	4	445	22	6012	0.008989	0.003659	ENSMUSP00000021028 ENSMUSP00000041008 ENSMUSP00000046105 ENSMUSP00000028882	ENSMUSP00000103015 ENSMUSP00000068468 ENSMUSP00000023486 ENSMUSP00000023128 ENSMUSP00000099718 ENSMUSP00000056669 ENSMUSP00000080974 ENSMUSP00000025523 ENSMUSP00000005218 ENSMUSP00000021028 ENSMUSP00000029748 ENSMUSP00000032492 ENSMUSP00000074902 ENSMUSP00000019248 ENSMUSP00000041008 ENSMUSP00000025263 ENSMUSP00000028881 ENSMUSP00000046105 ENSMUSP00000028882 ENSMUSP00000033063 ENSMUSP00000029717 …	over	0.07483	0.786895	0.181818
Organismal Systems	Immune system	mmu04610	Complement and coagulation cascades	5	445	31	6012	0.011236	0.005156	ENSMUSP00000033053 ENSMUSP00000002284 ENSMUSP00000141648 ENSMUSP00000039472 ENSMUSP00000048836	ENSMUSP00000000299 ENSMUSP00000068468 ENSMUSP00000033053 ENSMUSP00000024988 ENSMUSP00000048667 ENSMUSP00000083204 ENSMUSP00000028681 ENSMUSP00000074902 ENSMUSP00000002284 ENSMUSP00000068971 ENSMUSP00000032203 ENSMUSP00000069418 ENSMUSP00000039586 ENSMUSP00000036747 ENSMUSP00000129972 ENSMUSP00000040246 ENSMUSP00000141648 ENSMUSP00000039472 ENSMUSP00000014578 ENSMUSP00000023629 ENSMUSP00000022368 …	over	0.07488	0.786895	0.16129
Organismal Systems	Immune system	mmu04623	Cytosolic DNA-sensing pathway	5	445	31	6012	0.011236	0.005156	ENSMUSP00000042433 ENSMUSP00000000266 ENSMUSP00000022830 ENSMUSP00000029018 ENSMUSP00000026571	ENSMUSP00000042433 ENSMUSP00000020316 ENSMUSP00000029812 ENSMUSP00000027015 ENSMUSP00000050971 ENSMUSP00000025867 ENSMUSP00000033939 ENSMUSP00000021844 ENSMUSP00000004330 ENSMUSP00000003284 ENSMUSP00000054126 ENSMUSP00000021405 ENSMUSP00000103028 ENSMUSP00000004786 ENSMUSP00000028881 ENSMUSP00000084252 ENSMUSP00000000266 ENSMUSP00000022830 ENSMUSP00000033056 ENSMUSP00000063331 ENSMUSP00000029741 …	over	0.07488	0.786895	0.16129
Human Diseases	Cardiovascular disease	mmu05416	Viral myocarditis	5	445	31	6012	0.011236	0.005156	ENSMUSP00000041008 ENSMUSP00000046105 ENSMUSP00000030747 ENSMUSP00000080538 ENSMUSP00000125731	ENSMUSP00000071486 ENSMUSP00000000299 ENSMUSP00000047678 ENSMUSP00000101913 ENSMUSP00000124551 ENSMUSP00000083587 ENSMUSP00000134004 ENSMUSP00000145147 ENSMUSP00000098058 ENSMUSP00000140546 ENSMUSP00000017799 ENSMUSP00000057707 ENSMUSP00000027165 ENSMUSP00000080159 ENSMUSP00000099739 ENSMUSP00000041008 ENSMUSP00000036384 ENSMUSP00000072942 ENSMUSP00000134582 ENSMUSP00000147767 ENSMUSP00000046105 …	over	0.07488	0.786895	0.16129
Human Diseases	Infectious disease: viral	mmu05161	Hepatitis B	10	445	82	6012	0.022472	0.013639	ENSMUSP00000022894 ENSMUSP00000141132 ENSMUSP00000042433 ENSMUSP00000150354 ENSMUSP00000066789 ENSMUSP00000074198 ENSMUSP00000033394 ENSMUSP00000026571 ENSMUSP00000030747 ENSMUSP00000125731	ENSMUSP00000000804 ENSMUSP00000025649 ENSMUSP00000022622 ENSMUSP00000022894 ENSMUSP00000123605 ENSMUSP00000009036 ENSMUSP00000141132 ENSMUSP00000099842 ENSMUSP00000018470 ENSMUSP00000028259 ENSMUSP00000156154 ENSMUSP00000056774 ENSMUSP00000102106 ENSMUSP00000125291 ENSMUSP00000028817 ENSMUSP00000042433 ENSMUSP00000051619 ENSMUSP00000102980 ENSMUSP00000138788 ENSMUSP00000020316 ENSMUSP00000102981 …	over	0.0793491	0.786895	0.121951
Organismal Systems	Digestive system	mmu04975	Fat digestion and absorption	3	445	14	6012	0.006742	0.002329	ENSMUSP00000007005 ENSMUSP00000065719 ENSMUSP00000023214	ENSMUSP00000034097 ENSMUSP00000034547 ENSMUSP00000030010 ENSMUSP00000078971 ENSMUSP00000080974 ENSMUSP00000148768 ENSMUSP00000007005 ENSMUSP00000036044 ENSMUSP00000048573 ENSMUSP00000065719 ENSMUSP00000023214 ENSMUSP00000069670 ENSMUSP00000064423 ENSMUSP00000028286	over	0.0795737	0.786895	0.214286
Human Diseases	Infectious disease: parasitic	mmu05143	African trypanosomiasis	3	445	14	6012	0.006742	0.002329	ENSMUSP00000090897 ENSMUSP00000095794 ENSMUSP00000105736	ENSMUSP00000005057 ENSMUSP00000083587 ENSMUSP00000025912 ENSMUSP00000025541 ENSMUSP00000138788 ENSMUSP00000029574 ENSMUSP00000082207 ENSMUSP00000090897 ENSMUSP00000025263 ENSMUSP00000095794 ENSMUSP00000028881 ENSMUSP00000035092 ENSMUSP00000099583 ENSMUSP00000105736	over	0.0795737	0.786895	0.214286
Genetic Information Processing	Replication and repair	mmu03460	Fanconi anemia pathway	2	445	7	6012	0.004494	0.001164	ENSMUSP00000156132 ENSMUSP00000023206	ENSMUSP00000000767 ENSMUSP00000156132 ENSMUSP00000042509 ENSMUSP00000099621 ENSMUSP00000012627 ENSMUSP00000019986 ENSMUSP00000023206	over	0.0895396	0.819235	0.285714
Environmental Information Processing	Signal transduction	mmu04151	PI3K-Akt signaling pathway	12	445	106	6012	0.026966	0.017631	ENSMUSP00000070993 ENSMUSP00000022894 ENSMUSP00000019109 ENSMUSP00000021028 ENSMUSP00000099878 ENSMUSP00000121127 ENSMUSP00000001547 ENSMUSP00000031668 ENSMUSP00000053403 ENSMUSP00000044903 ENSMUSP00000130078 ENSMUSP00000030747	ENSMUSP00000024739 ENSMUSP00000020238 ENSMUSP00000091921 ENSMUSP00000028499 ENSMUSP00000054499 ENSMUSP00000087457 ENSMUSP00000070993 ENSMUSP00000038555 ENSMUSP00000110680 ENSMUSP00000022894 ENSMUSP00000023128 ENSMUSP00000019109 ENSMUSP00000123605 ENSMUSP00000101241 ENSMUSP00000099842 ENSMUSP00000007708 ENSMUSP00000018470 ENSMUSP00000106656 ENSMUSP00000113852 ENSMUSP00000099718 ENSMUSP00000143631 …	over	0.0909665	0.819235	0.113208
Human Diseases	Immune disease	mmu05332	Graft-versus-host disease	3	445	15	6012	0.006742	0.002495	ENSMUSP00000041008 ENSMUSP00000046105 ENSMUSP00000028882	ENSMUSP00000134004 ENSMUSP00000027165 ENSMUSP00000080159 ENSMUSP00000099739 ENSMUSP00000041008 ENSMUSP00000025263 ENSMUSP00000072942 ENSMUSP00000134582 ENSMUSP00000028881 ENSMUSP00000046105 ENSMUSP00000028882 ENSMUSP00000087047 ENSMUSP00000109389 ENSMUSP00000035687 ENSMUSP00000131297	over	0.0942223	0.819235	0.2
Environmental Information Processing	Signaling molecules and interaction	mmu04512	ECM-receptor interaction	4	445	24	6012	0.008989	0.003992	ENSMUSP00000021028 ENSMUSP00000001547 ENSMUSP00000031668 ENSMUSP00000044903	ENSMUSP00000028499 ENSMUSP00000054499 ENSMUSP00000087457 ENSMUSP00000110680 ENSMUSP00000023128 ENSMUSP00000099718 ENSMUSP00000080974 ENSMUSP00000005218 ENSMUSP00000021028 ENSMUSP00000155289 ENSMUSP00000001547 ENSMUSP00000031668 ENSMUSP00000001147 ENSMUSP00000084043 ENSMUSP00000155856 ENSMUSP00000044903 ENSMUSP00000108553 ENSMUSP00000017153 ENSMUSP00000033899 ENSMUSP00000044227 ENSMUSP00000057131 …	over	0.0969298	0.819235	0.166667
Human Diseases	Neurodegenerative disease	mmu05010	Alzheimer disease	23	445	235	6012	0.051685	0.039088	ENSMUSP00000113942 ENSMUSP00000076777 ENSMUSP00000060246 ENSMUSP00000042342 ENSMUSP00000099907 ENSMUSP00000020312 ENSMUSP00000001513 ENSMUSP00000022419 ENSMUSP00000058846 ENSMUSP00000028882 ENSMUSP00000054856 ENSMUSP00000080998 ENSMUSP00000016396 ENSMUSP00000112320 ENSMUSP00000146675 ENSMUSP00000033394 ENSMUSP00000146960 ENSMUSP00000138403 ENSMUSP00000033582 ENSMUSP00000030747 ENSMUSP00000015596 …	ENSMUSP00000044004 ENSMUSP00000026495 ENSMUSP00000026459 ENSMUSP00000135935 ENSMUSP00000022062 ENSMUSP00000027111 ENSMUSP00000113942 ENSMUSP00000025083 ENSMUSP00000020673 ENSMUSP00000134023 ENSMUSP00000076777 ENSMUSP00000071054 ENSMUSP00000016463 ENSMUSP00000027432 ENSMUSP00000033176 ENSMUSP00000051033 ENSMUSP00000025891 ENSMUSP00000078429 ENSMUSP00000015484 ENSMUSP00000007212 ENSMUSP00000001566 …	over	0.100366	0.819235	0.0978723
Organismal Systems	Immune system	mmu04612	Antigen processing and presentation	5	445	34	6012	0.011236	0.005655	ENSMUSP00000134735 ENSMUSP00000100564 ENSMUSP00000095171 ENSMUSP00000041008 ENSMUSP00000046105	ENSMUSP00000028222 ENSMUSP00000024739 ENSMUSP00000015800 ENSMUSP00000020630 ENSMUSP00000091921 ENSMUSP00000028683 ENSMUSP00000020637 ENSMUSP00000003912 ENSMUSP00000006235 ENSMUSP00000015667 ENSMUSP00000134735 ENSMUSP00000025161 ENSMUSP00000134004 ENSMUSP00000128401 ENSMUSP00000079306 ENSMUSP00000152169 ENSMUSP00000100564 ENSMUSP00000025197 ENSMUSP00000133815 ENSMUSP00000095171 ENSMUSP00000105647 …	over	0.102626	0.819235	0.147059
Human Diseases	Cancer: specific types	mmu05219	Bladder cancer	3	445	16	6012	0.006742	0.002661	ENSMUSP00000137333 ENSMUSP00000044903 ENSMUSP00000113252	ENSMUSP00000156154 ENSMUSP00000051619 ENSMUSP00000029445 ENSMUSP00000107339 ENSMUSP00000026572 ENSMUSP00000005066 ENSMUSP00000105155 ENSMUSP00000001155 ENSMUSP00000108571 ENSMUSP00000153607 ENSMUSP00000137333 ENSMUSP00000044903 ENSMUSP00000121111 ENSMUSP00000006911 ENSMUSP00000042987 ENSMUSP00000113252	over	0.109879	0.819235	0.1875
Metabolism	Metabolism of cofactors and vitamins	mmu00130	Ubiquinone and other terpenoid-quinone biosynthesis	2	445	8	6012	0.004494	0.001331	ENSMUSP00000033074 ENSMUSP00000095695	ENSMUSP00000048001 ENSMUSP00000105905 ENSMUSP00000029909 ENSMUSP00000033074 ENSMUSP00000059139 ENSMUSP00000095695 ENSMUSP00000003947 ENSMUSP00000070109	over	0.113709	0.819235	0.25
Organismal Systems	Immune system	mmu04672	Intestinal immune network for IgA production	2	445	8	6012	0.004494	0.001331	ENSMUSP00000041008 ENSMUSP00000046105	ENSMUSP00000099718 ENSMUSP00000017799 ENSMUSP00000002678 ENSMUSP00000027165 ENSMUSP00000041008 ENSMUSP00000046105 ENSMUSP00000087047 ENSMUSP00000151346	over	0.113709	0.819235	0.25
Human Diseases	Infectious disease: viral	mmu05168	Herpes simplex virus 1 infection	13	445	122	6012	0.029213	0.020293	ENSMUSP00000141132 ENSMUSP00000042433 ENSMUSP00000021028 ENSMUSP00000095171 ENSMUSP00000041008 ENSMUSP00000150354 ENSMUSP00000046105 ENSMUSP00000004910 ENSMUSP00000033394 ENSMUSP00000026571 ENSMUSP00000030747 ENSMUSP00000113244 ENSMUSP00000125731	ENSMUSP00000028683 ENSMUSP00000003912 ENSMUSP00000023128 ENSMUSP00000024988 ENSMUSP00000141132 ENSMUSP00000071214 ENSMUSP00000099842 ENSMUSP00000113852 ENSMUSP00000103553 ENSMUSP00000110012 ENSMUSP00000028259 ENSMUSP00000025161 ENSMUSP00000039109 ENSMUSP00000083474 ENSMUSP00000134004 ENSMUSP00000128401 ENSMUSP00000056774 ENSMUSP00000079198 ENSMUSP00000010241 ENSMUSP00000125291 ENSMUSP00000015100 …	over	0.11572	0.819235	0.106557
Environmental Information Processing	Signal transduction	mmu04066	HIF-1 signaling pathway	7	445	56	6012	0.01573	0.009315	ENSMUSP00000075513 ENSMUSP00000113942 ENSMUSP00000148107 ENSMUSP00000099878 ENSMUSP00000066789 ENSMUSP00000053403 ENSMUSP00000138403	ENSMUSP00000075513 ENSMUSP00000097282 ENSMUSP00000000642 ENSMUSP00000032934 ENSMUSP00000080302 ENSMUSP00000113942 ENSMUSP00000079991 ENSMUSP00000051215 ENSMUSP00000023486 ENSMUSP00000015484 ENSMUSP00000148107 ENSMUSP00000033662 ENSMUSP00000022268 ENSMUSP00000021614 ENSMUSP00000156154 ENSMUSP00000056774 ENSMUSP00000020522 ENSMUSP00000108264 ENSMUSP00000017534 ENSMUSP00000051619 ENSMUSP00000138788 …	over	0.117248	0.819235	0.125
Organismal Systems	Immune system	mmu04659	Th17 cell differentiation	5	445	36	6012	0.011236	0.005988	ENSMUSP00000141132 ENSMUSP00000041008 ENSMUSP00000150354 ENSMUSP00000046105 ENSMUSP00000074198	ENSMUSP00000024739 ENSMUSP00000091921 ENSMUSP00000141132 ENSMUSP00000099842 ENSMUSP00000156154 ENSMUSP00000051619 ENSMUSP00000071040 ENSMUSP00000102980 ENSMUSP00000102981 ENSMUSP00000029812 ENSMUSP00000099510 ENSMUSP00000002678 ENSMUSP00000089708 ENSMUSP00000061958 ENSMUSP00000025867 ENSMUSP00000033939 ENSMUSP00000004330 ENSMUSP00000125722 ENSMUSP00000041008 ENSMUSP00000120152 ENSMUSP00000025393 …	over	0.123578	0.819235	0.138889
Cellular Processes	Cell growth and death	mmu04215	Apoptosis - multiple species	3	445	17	6012	0.006742	0.002828	ENSMUSP00000033394 ENSMUSP00000030747 ENSMUSP00000125731	ENSMUSP00000125291 ENSMUSP00000140546 ENSMUSP00000033093 ENSMUSP00000087073 ENSMUSP00000119369 ENSMUSP00000138333 ENSMUSP00000147767 ENSMUSP00000077757 ENSMUSP00000007803 ENSMUSP00000020634 ENSMUSP00000115045 ENSMUSP00000002152 ENSMUSP00000033394 ENSMUSP00000026062 ENSMUSP00000140049 ENSMUSP00000030747 ENSMUSP00000125731	over	0.126453	0.819235	0.176471
Human Diseases	Endocrine and metabolic disease	mmu04940	Type I diabetes mellitus	3	445	17	6012	0.006742	0.002828	ENSMUSP00000041008 ENSMUSP00000046105 ENSMUSP00000028882	ENSMUSP00000027123 ENSMUSP00000134004 ENSMUSP00000027165 ENSMUSP00000080159 ENSMUSP00000099739 ENSMUSP00000041008 ENSMUSP00000025263 ENSMUSP00000072942 ENSMUSP00000134582 ENSMUSP00000028881 ENSMUSP00000046105 ENSMUSP00000028882 ENSMUSP00000087047 ENSMUSP00000109389 ENSMUSP00000035687 ENSMUSP00000111182 ENSMUSP00000131297	over	0.126453	0.819235	0.176471
Cellular Processes	Cellular community - eukaryotes	mmu04540	Gap junction	5	445	37	6012	0.011236	0.006154	ENSMUSP00000076777 ENSMUSP00000060246 ENSMUSP00000042342 ENSMUSP00000001513 ENSMUSP00000105736	ENSMUSP00000076777 ENSMUSP00000051033 ENSMUSP00000078429 ENSMUSP00000001566 ENSMUSP00000142326 ENSMUSP00000060246 ENSMUSP00000042342 ENSMUSP00000000001 ENSMUSP00000156154 ENSMUSP00000130594 ENSMUSP00000085179 ENSMUSP00000025912 ENSMUSP00000102106 ENSMUSP00000025541 ENSMUSP00000005606 ENSMUSP00000049584 ENSMUSP00000051619 ENSMUSP00000038150 ENSMUSP00000138788 ENSMUSP00000029445 ENSMUSP00000099573 …	over	0.134741	0.819235	0.135135
Metabolism	Glycan biosynthesis and metabolism	mmu00513	Various types of N-glycan biosynthesis	4	445	27	6012	0.008989	0.004491	ENSMUSP00000038387 ENSMUSP00000030121 ENSMUSP00000033643 ENSMUSP00000116802	ENSMUSP00000032143 ENSMUSP00000026262 ENSMUSP00000022169 ENSMUSP00000083928 ENSMUSP00000113116 ENSMUSP00000112081 ENSMUSP00000030538 ENSMUSP00000036996 ENSMUSP00000035010 ENSMUSP00000151568 ENSMUSP00000043580 ENSMUSP00000080484 ENSMUSP00000057905 ENSMUSP00000095949 ENSMUSP00000022781 ENSMUSP00000050979 ENSMUSP00000097770 ENSMUSP00000136327 ENSMUSP00000072382 ENSMUSP00000008907 ENSMUSP00000034561 …	over	0.135005	0.819235	0.148148
Environmental Information Processing	Signal transduction	mmu04350	TGF-beta signaling pathway	4	445	27	6012	0.008989	0.004491	ENSMUSP00000028633 ENSMUSP00000066789 ENSMUSP00000044903 ENSMUSP00000023809	ENSMUSP00000031697 ENSMUSP00000007708 ENSMUSP00000156154 ENSMUSP00000069549 ENSMUSP00000028633 ENSMUSP00000020608 ENSMUSP00000009774 ENSMUSP00000007959 ENSMUSP00000051619 ENSMUSP00000002678 ENSMUSP00000038744 ENSMUSP00000025263 ENSMUSP00000023165 ENSMUSP00000025393 ENSMUSP00000007757 ENSMUSP00000066789 ENSMUSP00000044903 ENSMUSP00000001326 ENSMUSP00000022217 ENSMUSP00000015003 ENSMUSP00000065798 …	over	0.135005	0.819235	0.148148
Metabolism	Glycan biosynthesis and metabolism	mmu00515	Mannose type O-glycan biosynthesis	1	445	2	6012	0.002247	0.000333	ENSMUSP00000030121	ENSMUSP00000030121 ENSMUSP00000112617	over	0.14257	0.827525	0.5
Metabolism	Metabolism of cofactors and vitamins	mmu00785	Lipoic acid metabolism	1	445	2	6012	0.002247	0.000333	ENSMUSP00000113228	ENSMUSP00000032967 ENSMUSP00000113228	over	0.14257	0.827525	0.5
Human Diseases	Infectious disease: parasitic	mmu05144	Malaria	3	445	19	6012	0.006742	0.00316	ENSMUSP00000090897 ENSMUSP00000095794 ENSMUSP00000044903	ENSMUSP00000044004 ENSMUSP00000000299 ENSMUSP00000101913 ENSMUSP00000083587 ENSMUSP00000080974 ENSMUSP00000029623 ENSMUSP00000029574 ENSMUSP00000017799 ENSMUSP00000002678 ENSMUSP00000082207 ENSMUSP00000074902 ENSMUSP00000090897 ENSMUSP00000025263 ENSMUSP00000095794 ENSMUSP00000028881 ENSMUSP00000035092 ENSMUSP00000044903 ENSMUSP00000043768 ENSMUSP00000022213	over	0.161983	0.870752	0.157895
Organismal Systems	Digestive system	mmu04970	Salivary secretion	4	445	29	6012	0.008989	0.004824	ENSMUSP00000028938 ENSMUSP00000070368 ENSMUSP00000105736 ENSMUSP00000128276	ENSMUSP00000039657 ENSMUSP00000099922 ENSMUSP00000020107 ENSMUSP00000083077 ENSMUSP00000019514 ENSMUSP00000130594 ENSMUSP00000085179 ENSMUSP00000025912 ENSMUSP00000025541 ENSMUSP00000005606 ENSMUSP00000049584 ENSMUSP00000038150 ENSMUSP00000138788 ENSMUSP00000089801 ENSMUSP00000034983 ENSMUSP00000099573 ENSMUSP00000078972 ENSMUSP00000028938 ENSMUSP00000089800 ENSMUSP00000099583 ENSMUSP00000030669 …	over	0.16325	0.870752	0.137931
Environmental Information Processing	Signal transduction	mmu04392	Hippo signaling pathway - multiple species	2	445	10	6012	0.004494	0.001663	ENSMUSP00000026269 ENSMUSP00000113252	ENSMUSP00000018476 ENSMUSP00000146055 ENSMUSP00000108855 ENSMUSP00000048267 ENSMUSP00000028814 ENSMUSP00000105536 ENSMUSP00000150888 ENSMUSP00000026269 ENSMUSP00000113252 ENSMUSP00000006311	over	0.165952	0.870752	0.2
Organismal Systems	Immune system	mmu04613	Neutrophil extracellular trap formation	9	445	84	6012	0.020225	0.013972	ENSMUSP00000020779 ENSMUSP00000021028 ENSMUSP00000022419 ENSMUSP00000141648 ENSMUSP00000039472 ENSMUSP00000015583 ENSMUSP00000111412 ENSMUSP00000015596 ENSMUSP00000105736	ENSMUSP00000071486 ENSMUSP00000000299 ENSMUSP00000068468 ENSMUSP00000079991 ENSMUSP00000020673 ENSMUSP00000134023 ENSMUSP00000140404 ENSMUSP00000016463 ENSMUSP00000015484 ENSMUSP00000016081 ENSMUSP00000034049 ENSMUSP00000024988 ENSMUSP00000101913 ENSMUSP00000009036 ENSMUSP00000085006 ENSMUSP00000106099 ENSMUSP00000078239 ENSMUSP00000113852 ENSMUSP00000107787 ENSMUSP00000016094 ENSMUSP00000020779 …	over	0.166842	0.870752	0.107143
Metabolism	Carbohydrate metabolism	mmu00010	Glycolysis / Gluconeogenesis	5	445	40	6012	0.011236	0.006653	ENSMUSP00000128770 ENSMUSP00000075513 ENSMUSP00000113942 ENSMUSP00000148107 ENSMUSP00000138403	ENSMUSP00000034834 ENSMUSP00000128770 ENSMUSP00000075513 ENSMUSP00000097282 ENSMUSP00000000642 ENSMUSP00000032934 ENSMUSP00000031411 ENSMUSP00000080302 ENSMUSP00000113942 ENSMUSP00000051215 ENSMUSP00000011896 ENSMUSP00000028004 ENSMUSP00000038555 ENSMUSP00000148107 ENSMUSP00000106481 ENSMUSP00000061227 ENSMUSP00000033662 ENSMUSP00000022268 ENSMUSP00000049355 ENSMUSP00000150509 ENSMUSP00000021614 …	over	0.17073	0.870752	0.125
Organismal Systems	Endocrine system	mmu04919	Thyroid hormone signaling pathway	7	445	62	6012	0.01573	0.010313	ENSMUSP00000141132 ENSMUSP00000021028 ENSMUSP00000066789 ENSMUSP00000129375 ENSMUSP00000030747 ENSMUSP00000080538 ENSMUSP00000105736	ENSMUSP00000039657 ENSMUSP00000071486 ENSMUSP00000099922 ENSMUSP00000135935 ENSMUSP00000028499 ENSMUSP00000083077 ENSMUSP00000079991 ENSMUSP00000141132 ENSMUSP00000021142 ENSMUSP00000021614 ENSMUSP00000156154 ENSMUSP00000025912 ENSMUSP00000056774 ENSMUSP00000020522 ENSMUSP00000078741 ENSMUSP00000005606 ENSMUSP00000099657 ENSMUSP00000051619 ENSMUSP00000138788 ENSMUSP00000029445 ENSMUSP00000021028 …	over	0.172185	0.870752	0.112903
Human Diseases	Endocrine and metabolic disease	mmu04933	AGE-RAGE signaling pathway in diabetic complications	6	445	51	6012	0.013483	0.008483	ENSMUSP00000141132 ENSMUSP00000001547 ENSMUSP00000031668 ENSMUSP00000028882 ENSMUSP00000015596 ENSMUSP00000105736	ENSMUSP00000079991 ENSMUSP00000054499 ENSMUSP00000025337 ENSMUSP00000015484 ENSMUSP00000107829 ENSMUSP00000141132 ENSMUSP00000083587 ENSMUSP00000156154 ENSMUSP00000025912 ENSMUSP00000056774 ENSMUSP00000054634 ENSMUSP00000051619 ENSMUSP00000102980 ENSMUSP00000138788 ENSMUSP00000102981 ENSMUSP00000029445 ENSMUSP00000098058 ENSMUSP00000029812 ENSMUSP00000029574 ENSMUSP00000033093 ENSMUSP00000002678 …	over	0.172846	0.870752	0.117647
Organismal Systems	Immune system	mmu04622	RIG-I-like receptor signaling pathway	4	445	30	6012	0.008989	0.00499	ENSMUSP00000042433 ENSMUSP00000082548 ENSMUSP00000033394 ENSMUSP00000026571	ENSMUSP00000000804 ENSMUSP00000028259 ENSMUSP00000042433 ENSMUSP00000020316 ENSMUSP00000029812 ENSMUSP00000140546 ENSMUSP00000017974 ENSMUSP00000034621 ENSMUSP00000061958 ENSMUSP00000025867 ENSMUSP00000033939 ENSMUSP00000021844 ENSMUSP00000004330 ENSMUSP00000103528 ENSMUSP00000025263 ENSMUSP00000044769 ENSMUSP00000003284 ENSMUSP00000054126 ENSMUSP00000082548 ENSMUSP00000034359 ENSMUSP00000020634 …	over	0.17811	0.880654	0.133333
Metabolism	Glycan biosynthesis and metabolism	mmu00512	Mucin type O-glycan biosynthesis	2	445	11	6012	0.004494	0.00183	ENSMUSP00000036240 ENSMUSP00000059224	ENSMUSP00000034021 ENSMUSP00000034458 ENSMUSP00000000430 ENSMUSP00000125315 ENSMUSP00000104844 ENSMUSP00000123848 ENSMUSP00000047931 ENSMUSP00000154853 ENSMUSP00000036240 ENSMUSP00000034260 ENSMUSP00000059224	over	0.193386	0.890303	0.181818
Metabolism	Nucleotide metabolism	mmu00230	Purine metabolism	6	445	53	6012	0.013483	0.008816	ENSMUSP00000043926 ENSMUSP00000084882 ENSMUSP00000059173 ENSMUSP00000035179 ENSMUSP00000114945 ENSMUSP00000112064	ENSMUSP00000024866 ENSMUSP00000027384 ENSMUSP00000061227 ENSMUSP00000043926 ENSMUSP00000025696 ENSMUSP00000023684 ENSMUSP00000029405 ENSMUSP00000084582 ENSMUSP00000030583 ENSMUSP00000130594 ENSMUSP00000114273 ENSMUSP00000031160 ENSMUSP00000021282 ENSMUSP00000017841 ENSMUSP00000002397 ENSMUSP00000149655 ENSMUSP00000016105 ENSMUSP00000026723 ENSMUSP00000023043 ENSMUSP00000047665 ENSMUSP00000079888 …	over	0.19562	0.890303	0.113208
Human Diseases	Infectious disease: parasitic	mmu05145	Toxoplasmosis	6	445	53	6012	0.013483	0.008816	ENSMUSP00000141132 ENSMUSP00000041008 ENSMUSP00000150354 ENSMUSP00000046105 ENSMUSP00000022419 ENSMUSP00000030747	ENSMUSP00000015800 ENSMUSP00000087457 ENSMUSP00000142326 ENSMUSP00000141132 ENSMUSP00000099842 ENSMUSP00000000001 ENSMUSP00000156154 ENSMUSP00000079306 ENSMUSP00000050446 ENSMUSP00000051619 ENSMUSP00000029812 ENSMUSP00000029623 ENSMUSP00000140546 ENSMUSP00000133815 ENSMUSP00000017799 ENSMUSP00000002678 ENSMUSP00000061958 ENSMUSP00000025867 ENSMUSP00000033939 ENSMUSP00000123539 ENSMUSP00000004330 …	over	0.19562	0.890303	0.113208
Human Diseases	Infectious disease: parasitic	mmu05140	Leishmaniasis	5	445	42	6012	0.011236	0.006986	ENSMUSP00000042457 ENSMUSP00000141132 ENSMUSP00000041008 ENSMUSP00000046105 ENSMUSP00000028882	ENSMUSP00000000299 ENSMUSP00000068468 ENSMUSP00000042457 ENSMUSP00000087457 ENSMUSP00000004377 ENSMUSP00000140404 ENSMUSP00000015484 ENSMUSP00000024988 ENSMUSP00000141132 ENSMUSP00000099842 ENSMUSP00000016094 ENSMUSP00000054556 ENSMUSP00000099718 ENSMUSP00000156154 ENSMUSP00000094084 ENSMUSP00000051619 ENSMUSP00000138788 ENSMUSP00000035065 ENSMUSP00000029812 ENSMUSP00000029623 ENSMUSP00000029748 …	over	0.196573	0.890303	0.119048
Human Diseases	Infectious disease: viral	mmu05162	Measles	8	445	76	6012	0.017978	0.012641	ENSMUSP00000141132 ENSMUSP00000042433 ENSMUSP00000150354 ENSMUSP00000028882 ENSMUSP00000033394 ENSMUSP00000026571 ENSMUSP00000030747 ENSMUSP00000125731	ENSMUSP00000113071 ENSMUSP00000015800 ENSMUSP00000141132 ENSMUSP00000071214 ENSMUSP00000099842 ENSMUSP00000020640 ENSMUSP00000107787 ENSMUSP00000028259 ENSMUSP00000056774 ENSMUSP00000079306 ENSMUSP00000079198 ENSMUSP00000125291 ENSMUSP00000042433 ENSMUSP00000022925 ENSMUSP00000102980 ENSMUSP00000020316 ENSMUSP00000102981 ENSMUSP00000100872 ENSMUSP00000029812 ENSMUSP00000029623 ENSMUSP00000096829 …	over	0.198144	0.890303	0.105263
Environmental Information Processing	Signal transduction	mmu04330	Notch signaling pathway	3	445	21	6012	0.006742	0.003493	ENSMUSP00000066789 ENSMUSP00000058846 ENSMUSP00000146675	ENSMUSP00000078741 ENSMUSP00000099657 ENSMUSP00000099087 ENSMUSP00000078682 ENSMUSP00000080601 ENSMUSP00000119303 ENSMUSP00000130294 ENSMUSP00000003550 ENSMUSP00000019911 ENSMUSP00000048363 ENSMUSP00000023165 ENSMUSP00000136010 ENSMUSP00000028288 ENSMUSP00000021428 ENSMUSP00000066789 ENSMUSP00000040694 ENSMUSP00000058846 ENSMUSP00000130359 ENSMUSP00000107033 ENSMUSP00000146675 ENSMUSP00000136255	over	0.200068	0.890303	0.142857
Organismal Systems	Endocrine system	mmu03320	PPAR signaling pathway	4	445	32	6012	0.008989	0.005323	ENSMUSP00000025500 ENSMUSP00000131415 ENSMUSP00000070709 ENSMUSP00000026220	ENSMUSP00000042351 ENSMUSP00000027153 ENSMUSP00000038555 ENSMUSP00000034046 ENSMUSP00000029046 ENSMUSP00000108528 ENSMUSP00000046585 ENSMUSP00000030340 ENSMUSP00000063412 ENSMUSP00000078971 ENSMUSP00000072483 ENSMUSP00000080974 ENSMUSP00000030345 ENSMUSP00000033182 ENSMUSP00000063325 ENSMUSP00000029041 ENSMUSP00000148768 ENSMUSP00000109611 ENSMUSP00000025835 ENSMUSP00000136944 ENSMUSP00000045291 …	over	0.209087	0.915182	0.125
Organismal Systems	Endocrine system	mmu04915	Estrogen signaling pathway	6	445	55	6012	0.013483	0.009148	ENSMUSP00000007275 ENSMUSP00000007318 ENSMUSP00000018399 ENSMUSP00000099416 ENSMUSP00000017741 ENSMUSP00000105736	ENSMUSP00000024739 ENSMUSP00000015800 ENSMUSP00000020238 ENSMUSP00000091921 ENSMUSP00000121203 ENSMUSP00000142326 ENSMUSP00000007272 ENSMUSP00000079699 ENSMUSP00000107829 ENSMUSP00000019514 ENSMUSP00000099420 ENSMUSP00000032508 ENSMUSP00000000001 ENSMUSP00000156154 ENSMUSP00000130594 ENSMUSP00000085179 ENSMUSP00000025912 ENSMUSP00000056774 ENSMUSP00000079306 ENSMUSP00000102106 ENSMUSP00000025541 …	over	0.219446	0.942507	0.109091
Human Diseases	Neurodegenerative disease	mmu05012	Parkinson disease	16	445	175	6012	0.035955	0.029108	ENSMUSP00000076777 ENSMUSP00000060246 ENSMUSP00000042342 ENSMUSP00000099909 ENSMUSP00000020312 ENSMUSP00000001513 ENSMUSP00000030051 ENSMUSP00000022419 ENSMUSP00000040550 ENSMUSP00000054856 ENSMUSP00000080998 ENSMUSP00000016396 ENSMUSP00000112320 ENSMUSP00000146960 ENSMUSP00000033582 ENSMUSP00000030747	ENSMUSP00000028222 ENSMUSP00000026495 ENSMUSP00000026459 ENSMUSP00000022062 ENSMUSP00000086626 ENSMUSP00000027111 ENSMUSP00000025083 ENSMUSP00000020673 ENSMUSP00000134023 ENSMUSP00000076777 ENSMUSP00000071054 ENSMUSP00000016463 ENSMUSP00000027432 ENSMUSP00000033176 ENSMUSP00000051033 ENSMUSP00000078429 ENSMUSP00000007212 ENSMUSP00000001566 ENSMUSP00000142326 ENSMUSP00000060246 ENSMUSP00000034049 …	over	0.222389	0.942507	0.0914286
Metabolism	Glycan biosynthesis and metabolism	mmu00510	N-Glycan biosynthesis	4	445	34	6012	0.008989	0.005655	ENSMUSP00000038387 ENSMUSP00000030121 ENSMUSP00000033643 ENSMUSP00000116802	ENSMUSP00000032143 ENSMUSP00000093965 ENSMUSP00000083928 ENSMUSP00000113116 ENSMUSP00000112081 ENSMUSP00000030538 ENSMUSP00000035879 ENSMUSP00000032114 ENSMUSP00000036996 ENSMUSP00000035010 ENSMUSP00000151568 ENSMUSP00000043580 ENSMUSP00000080484 ENSMUSP00000057905 ENSMUSP00000095949 ENSMUSP00000022781 ENSMUSP00000050979 ENSMUSP00000103086 ENSMUSP00000097770 ENSMUSP00000038359 ENSMUSP00000136327 …	over	0.241448	0.947559	0.117647
Human Diseases	Cardiovascular disease	mmu05415	Diabetic cardiomyopathy	13	445	141	6012	0.029213	0.023453	ENSMUSP00000113942 ENSMUSP00000001547 ENSMUSP00000031668 ENSMUSP00000022419 ENSMUSP00000054856 ENSMUSP00000080998 ENSMUSP00000016396 ENSMUSP00000112320 ENSMUSP00000146960 ENSMUSP00000138403 ENSMUSP00000033582 ENSMUSP00000015596 ENSMUSP00000105736	ENSMUSP00000026495 ENSMUSP00000026459 ENSMUSP00000135935 ENSMUSP00000022062 ENSMUSP00000027111 ENSMUSP00000113942 ENSMUSP00000020673 ENSMUSP00000121203 ENSMUSP00000134023 ENSMUSP00000004327 ENSMUSP00000140404 ENSMUSP00000027777 ENSMUSP00000016463 ENSMUSP00000033176 ENSMUSP00000015484 ENSMUSP00000034049 ENSMUSP00000033992 ENSMUSP00000107829 ENSMUSP00000009036 ENSMUSP00000026743 ENSMUSP00000033662 …	over	0.243173	0.947559	0.0921986
Metabolism	Metabolism of cofactors and vitamins	mmu00830	Retinol metabolism	2	445	13	6012	0.004494	0.002162	ENSMUSP00000027053 ENSMUSP00000023214	ENSMUSP00000124066 ENSMUSP00000058683 ENSMUSP00000005964 ENSMUSP00000022821 ENSMUSP00000008579 ENSMUSP00000068568 ENSMUSP00000122552 ENSMUSP00000041175 ENSMUSP00000025656 ENSMUSP00000027053 ENSMUSP00000023214 ENSMUSP00000026211 ENSMUSP00000031741	over	0.249575	0.947559	0.153846
Human Diseases	Immune disease	mmu05320	Autoimmune thyroid disease	2	445	13	6012	0.004494	0.002162	ENSMUSP00000041008 ENSMUSP00000046105	ENSMUSP00000134004 ENSMUSP00000017799 ENSMUSP00000027165 ENSMUSP00000080159 ENSMUSP00000099739 ENSMUSP00000041008 ENSMUSP00000072942 ENSMUSP00000134582 ENSMUSP00000046105 ENSMUSP00000087047 ENSMUSP00000109389 ENSMUSP00000035687 ENSMUSP00000131297	over	0.249575	0.947559	0.153846
Environmental Information Processing	Signal transduction	mmu04390	Hippo signaling pathway	5	445	46	6012	0.011236	0.007651	ENSMUSP00000070993 ENSMUSP00000022894 ENSMUSP00000019109 ENSMUSP00000026269 ENSMUSP00000113252	ENSMUSP00000071486 ENSMUSP00000000299 ENSMUSP00000070993 ENSMUSP00000022894 ENSMUSP00000019109 ENSMUSP00000123605 ENSMUSP00000007708 ENSMUSP00000018470 ENSMUSP00000143631 ENSMUSP00000039109 ENSMUSP00000083474 ENSMUSP00000020608 ENSMUSP00000015100 ENSMUSP00000009774 ENSMUSP00000064280 ENSMUSP00000002678 ENSMUSP00000002603 ENSMUSP00000018476 ENSMUSP00000086640 ENSMUSP00000060749 ENSMUSP00000110398 …	over	0.251785	0.947559	0.108696
Environmental Information Processing	Signal transduction	mmu04630	JAK-STAT signaling pathway	4	445	35	6012	0.008989	0.005822	ENSMUSP00000141132 ENSMUSP00000150354 ENSMUSP00000066789 ENSMUSP00000112675	ENSMUSP00000004377 ENSMUSP00000141132 ENSMUSP00000099842 ENSMUSP00000056774 ENSMUSP00000102106 ENSMUSP00000102980 ENSMUSP00000102981 ENSMUSP00000100872 ENSMUSP00000099510 ENSMUSP00000058757 ENSMUSP00000035037 ENSMUSP00000089708 ENSMUSP00000026572 ENSMUSP00000044048 ENSMUSP00000101315 ENSMUSP00000023165 ENSMUSP00000120152 ENSMUSP00000150354 ENSMUSP00000066789 ENSMUSP00000108571 ENSMUSP00000036326 …	over	0.258039	0.947559	0.114286
Metabolism	Nucleotide metabolism	mmu00240	Pyrimidine metabolism	3	445	24	6012	0.006742	0.003992	ENSMUSP00000020969 ENSMUSP00000030491 ENSMUSP00000090360	ENSMUSP00000020969 ENSMUSP00000013773 ENSMUSP00000114273 ENSMUSP00000115934 ENSMUSP00000030491 ENSMUSP00000031793 ENSMUSP00000107920 ENSMUSP00000023510 ENSMUSP00000116285 ENSMUSP00000024978 ENSMUSP00000080767 ENSMUSP00000130898 ENSMUSP00000030381 ENSMUSP00000027503 ENSMUSP00000050398 ENSMUSP00000021082 ENSMUSP00000030154 ENSMUSP00000053616 ENSMUSP00000033283 ENSMUSP00000090360 ENSMUSP00000035053 …	over	0.260426	0.947559	0.125
Organismal Systems	Excretory system	mmu04962	Vasopressin-regulated water reabsorption	3	445	24	6012	0.006742	0.003992	ENSMUSP00000101803 ENSMUSP00000107523 ENSMUSP00000000727	ENSMUSP00000018851 ENSMUSP00000099364 ENSMUSP00000109552 ENSMUSP00000107768 ENSMUSP00000102987 ENSMUSP00000110021 ENSMUSP00000026479 ENSMUSP00000085179 ENSMUSP00000101803 ENSMUSP00000129163 ENSMUSP00000035366 ENSMUSP00000005606 ENSMUSP00000107523 ENSMUSP00000099573 ENSMUSP00000000727 ENSMUSP00000033075 ENSMUSP00000017975 ENSMUSP00000045480 ENSMUSP00000153008 ENSMUSP00000020775 ENSMUSP00000009157 …	over	0.260426	0.947559	0.125
Organismal Systems	Digestive system	mmu04974	Protein digestion and absorption	3	445	24	6012	0.006742	0.003992	ENSMUSP00000001547 ENSMUSP00000031668 ENSMUSP00000029848	ENSMUSP00000039657 ENSMUSP00000099922 ENSMUSP00000083077 ENSMUSP00000130194 ENSMUSP00000034983 ENSMUSP00000075429 ENSMUSP00000022787 ENSMUSP00000001547 ENSMUSP00000031668 ENSMUSP00000126373 ENSMUSP00000090227 ENSMUSP00000001147 ENSMUSP00000000984 ENSMUSP00000108553 ENSMUSP00000023099 ENSMUSP00000071976 ENSMUSP00000022576 ENSMUSP00000033899 ENSMUSP00000044050 ENSMUSP00000031931 ENSMUSP00000104136 …	over	0.260426	0.947559	0.125
Metabolism	Glycan biosynthesis and metabolism	mmu00533	Glycosaminoglycan biosynthesis - keratan sulfate	1	445	4	6012	0.002247	0.000665	ENSMUSP00000030121	ENSMUSP00000136327 ENSMUSP00000060247 ENSMUSP00000154853 ENSMUSP00000030121	over	0.264853	0.947559	0.25
Metabolism	Glycan biosynthesis and metabolism	mmu00601	Glycosphingolipid biosynthesis - lacto and neolacto series	1	445	4	6012	0.002247	0.000665	ENSMUSP00000030121	ENSMUSP00000034537 ENSMUSP00000060247 ENSMUSP00000030121 ENSMUSP00000034260	over	0.264853	0.947559	0.25
Organismal Systems	Endocrine system	mmu04922	Glucagon signaling pathway	5	445	47	6012	0.011236	0.007818	ENSMUSP00000128770 ENSMUSP00000148107 ENSMUSP00000020755 ENSMUSP00000066789 ENSMUSP00000105736	ENSMUSP00000034834 ENSMUSP00000128770 ENSMUSP00000011896 ENSMUSP00000071231 ENSMUSP00000038555 ENSMUSP00000148107 ENSMUSP00000019514 ENSMUSP00000035743 ENSMUSP00000033662 ENSMUSP00000022268 ENSMUSP00000150509 ENSMUSP00000021614 ENSMUSP00000085179 ENSMUSP00000025912 ENSMUSP00000020522 ENSMUSP00000103474 ENSMUSP00000025541 ENSMUSP00000005606 ENSMUSP00000049584 ENSMUSP00000071040 ENSMUSP00000038150 …	over	0.266168	0.947559	0.106383
Human Diseases	Neurodegenerative disease	mmu05020	Prion disease	16	445	182	6012	0.035955	0.030273	ENSMUSP00000076777 ENSMUSP00000060246 ENSMUSP00000042342 ENSMUSP00000020312 ENSMUSP00000001513 ENSMUSP00000022419 ENSMUSP00000028882 ENSMUSP00000048836 ENSMUSP00000054856 ENSMUSP00000080998 ENSMUSP00000016396 ENSMUSP00000112320 ENSMUSP00000142331 ENSMUSP00000146960 ENSMUSP00000033582 ENSMUSP00000030747	ENSMUSP00000028222 ENSMUSP00000015800 ENSMUSP00000026495 ENSMUSP00000026459 ENSMUSP00000022062 ENSMUSP00000027111 ENSMUSP00000025083 ENSMUSP00000020673 ENSMUSP00000134023 ENSMUSP00000076777 ENSMUSP00000140404 ENSMUSP00000071054 ENSMUSP00000016463 ENSMUSP00000027432 ENSMUSP00000033176 ENSMUSP00000051033 ENSMUSP00000078429 ENSMUSP00000025918 ENSMUSP00000015484 ENSMUSP00000007212 ENSMUSP00000001566 …	over	0.271419	0.951303	0.0879121
Human Diseases	Immune disease	mmu05322	Systemic lupus erythematosus	4	445	36	6012	0.008989	0.005988	ENSMUSP00000041008 ENSMUSP00000046105 ENSMUSP00000015583 ENSMUSP00000048836	ENSMUSP00000066068 ENSMUSP00000021554 ENSMUSP00000016081 ENSMUSP00000024988 ENSMUSP00000088365 ENSMUSP00000085006 ENSMUSP00000106099 ENSMUSP00000078239 ENSMUSP00000088287 ENSMUSP00000115666 ENSMUSP00000020397 ENSMUSP00000029748 ENSMUSP00000017799 ENSMUSP00000151536 ENSMUSP00000124509 ENSMUSP00000051432 ENSMUSP00000074310 ENSMUSP00000027165 ENSMUSP00000041008 ENSMUSP00000025263 ENSMUSP00000036907 …	over	0.274847	0.951303	0.111111
Human Diseases	Immune disease	mmu05330	Allograft rejection	2	445	14	6012	0.004494	0.002329	ENSMUSP00000041008 ENSMUSP00000046105	ENSMUSP00000134004 ENSMUSP00000017799 ENSMUSP00000027165 ENSMUSP00000080159 ENSMUSP00000099739 ENSMUSP00000041008 ENSMUSP00000025263 ENSMUSP00000072942 ENSMUSP00000134582 ENSMUSP00000046105 ENSMUSP00000087047 ENSMUSP00000109389 ENSMUSP00000035687 ENSMUSP00000131297	over	0.277909	0.951303	0.142857
Metabolism	Metabolism of cofactors and vitamins	mmu00760	Nicotinate and nicotinamide metabolism	2	445	15	6012	0.004494	0.002495	ENSMUSP00000020886 ENSMUSP00000043926	ENSMUSP00000096753 ENSMUSP00000020886 ENSMUSP00000043926 ENSMUSP00000114273 ENSMUSP00000152796 ENSMUSP00000072732 ENSMUSP00000130898 ENSMUSP00000021082 ENSMUSP00000147716 ENSMUSP00000079093 ENSMUSP00000030939 ENSMUSP00000030845 ENSMUSP00000032912 ENSMUSP00000023237 ENSMUSP00000025065	over	0.306168	0.999065	0.133333
Organismal Systems	Excretory system	mmu04966	Collecting duct acid secretion	2	445	15	6012	0.004494	0.002495	ENSMUSP00000029900 ENSMUSP00000048770	ENSMUSP00000110314 ENSMUSP00000006435 ENSMUSP00000122474 ENSMUSP00000099399 ENSMUSP00000022904 ENSMUSP00000019354 ENSMUSP00000013304 ENSMUSP00000029900 ENSMUSP00000017900 ENSMUSP00000021536 ENSMUSP00000039737 ENSMUSP00000024932 ENSMUSP00000004396 ENSMUSP00000048770 ENSMUSP00000069482	over	0.306168	0.999065	0.133333
Human Diseases	Infectious disease: bacterial	mmu05134	Legionellosis	4	445	38	6012	0.008989	0.006321	ENSMUSP00000042457 ENSMUSP00000031327 ENSMUSP00000020653 ENSMUSP00000030747	ENSMUSP00000030164 ENSMUSP00000000299 ENSMUSP00000015800 ENSMUSP00000027123 ENSMUSP00000068468 ENSMUSP00000042457 ENSMUSP00000024988 ENSMUSP00000127330 ENSMUSP00000054556 ENSMUSP00000093955 ENSMUSP00000072859 ENSMUSP00000056669 ENSMUSP00000079306 ENSMUSP00000125291 ENSMUSP00000051814 ENSMUSP00000029476 ENSMUSP00000029812 ENSMUSP00000029623 ENSMUSP00000140546 ENSMUSP00000133815 ENSMUSP00000027015 …	over	0.308947	0.999065	0.105263
Environmental Information Processing	Signaling molecules and interaction	mmu04060	Cytokine-cytokine receptor interaction	3	445	27	6012	0.006742	0.004491	ENSMUSP00000031327 ENSMUSP00000028882 ENSMUSP00000023809	ENSMUSP00000025523 ENSMUSP00000017799 ENSMUSP00000002678 ENSMUSP00000025263 ENSMUSP00000028881 ENSMUSP00000007757 ENSMUSP00000031327 ENSMUSP00000036326 ENSMUSP00000030336 ENSMUSP00000154836 ENSMUSP00000023693 ENSMUSP00000019064 ENSMUSP00000039600 ENSMUSP00000028882 ENSMUSP00000151575 ENSMUSP00000021970 ENSMUSP00000093843 ENSMUSP00000001792 ENSMUSP00000032211 ENSMUSP00000020188 ENSMUSP00000074885 …	over	0.322721	0.999065	0.111111
Organismal Systems	Circulatory system	mmu04260	Cardiac muscle contraction	4	445	39	6012	0.008989	0.006487	ENSMUSP00000054856 ENSMUSP00000146960 ENSMUSP00000033582 ENSMUSP00000080538	ENSMUSP00000039657 ENSMUSP00000099922 ENSMUSP00000135935 ENSMUSP00000087736 ENSMUSP00000083077 ENSMUSP00000033176 ENSMUSP00000029549 ENSMUSP00000026743 ENSMUSP00000109325 ENSMUSP00000003575 ENSMUSP00000021142 ENSMUSP00000077273 ENSMUSP00000109326 ENSMUSP00000034276 ENSMUSP00000034983 ENSMUSP00000075150 ENSMUSP00000045284 ENSMUSP00000103546 ENSMUSP00000021993 ENSMUSP00000053145 ENSMUSP00000023210 …	over	0.326159	0.999065	0.102564
Metabolism	Metabolism of terpenoids and polyketides	mmu00900	Terpenoid backbone biosynthesis	2	445	16	6012	0.004494	0.002661	ENSMUSP00000142770 ENSMUSP00000007005	ENSMUSP00000034547 ENSMUSP00000032065 ENSMUSP00000142770 ENSMUSP00000053900 ENSMUSP00000136944 ENSMUSP00000142393 ENSMUSP00000007005 ENSMUSP00000132780 ENSMUSP00000022176 ENSMUSP00000016138 ENSMUSP00000043390 ENSMUSP00000006692 ENSMUSP00000035498 ENSMUSP00000126603 ENSMUSP00000101511 ENSMUSP00000025823	over	0.33421	0.999065	0.125
Metabolism	Energy metabolism	mmu00190	Oxidative phosphorylation	9	445	102	6012	0.020225	0.016966	ENSMUSP00000029900 ENSMUSP00000048770 ENSMUSP00000054856 ENSMUSP00000047960 ENSMUSP00000080998 ENSMUSP00000016396 ENSMUSP00000112320 ENSMUSP00000146960 ENSMUSP00000033582	ENSMUSP00000026495 ENSMUSP00000026459 ENSMUSP00000110314 ENSMUSP00000022062 ENSMUSP00000027111 ENSMUSP00000006435 ENSMUSP00000122474 ENSMUSP00000099399 ENSMUSP00000033176 ENSMUSP00000040756 ENSMUSP00000026743 ENSMUSP00000042967 ENSMUSP00000010007 ENSMUSP00000027478 ENSMUSP00000022904 ENSMUSP00000034276 ENSMUSP00000110547 ENSMUSP00000113022 ENSMUSP00000019354 ENSMUSP00000013304 ENSMUSP00000102147 …	over	0.341749	0.999065	0.0882353
Metabolism	Lipid metabolism	mmu00561	Glycerolipid metabolism	3	445	28	6012	0.006742	0.004657	ENSMUSP00000109211 ENSMUSP00000065719 ENSMUSP00000023214	ENSMUSP00000031411 ENSMUSP00000028004 ENSMUSP00000030455 ENSMUSP00000039114 ENSMUSP00000100045 ENSMUSP00000067767 ENSMUSP00000041260 ENSMUSP00000109611 ENSMUSP00000106934 ENSMUSP00000040244 ENSMUSP00000031977 ENSMUSP00000109211 ENSMUSP00000001240 ENSMUSP00000024594 ENSMUSP00000068690 ENSMUSP00000117025 ENSMUSP00000065089 ENSMUSP00000015712 ENSMUSP00000048573 ENSMUSP00000065719 ENSMUSP00000023214 …	over	0.343583	0.999065	0.107143
Metabolism	Carbohydrate metabolism	mmu00620	Pyruvate metabolism	3	445	28	6012	0.006742	0.004657	ENSMUSP00000128770 ENSMUSP00000148107 ENSMUSP00000007005	ENSMUSP00000034834 ENSMUSP00000128770 ENSMUSP00000031411 ENSMUSP00000019323 ENSMUSP00000028004 ENSMUSP00000034547 ENSMUSP00000027810 ENSMUSP00000038555 ENSMUSP00000148107 ENSMUSP00000106481 ENSMUSP00000033662 ENSMUSP00000022268 ENSMUSP00000150509 ENSMUSP00000025439 ENSMUSP00000030455 ENSMUSP00000034567 ENSMUSP00000063825 ENSMUSP00000067767 ENSMUSP00000041260 ENSMUSP00000005964 ENSMUSP00000099490 …	over	0.343583	0.999065	0.107143
Human Diseases	Infectious disease: viral	mmu05169	Epstein-Barr virus infection	10	445	115	6012	0.022472	0.019128	ENSMUSP00000141132 ENSMUSP00000042433 ENSMUSP00000041008 ENSMUSP00000150354 ENSMUSP00000046105 ENSMUSP00000082548 ENSMUSP00000033394 ENSMUSP00000026571 ENSMUSP00000030747 ENSMUSP00000125731	ENSMUSP00000028062 ENSMUSP00000028683 ENSMUSP00000003912 ENSMUSP00000079991 ENSMUSP00000071054 ENSMUSP00000027432 ENSMUSP00000007212 ENSMUSP00000100075 ENSMUSP00000021049 ENSMUSP00000124382 ENSMUSP00000101913 ENSMUSP00000141132 ENSMUSP00000099842 ENSMUSP00000021063 ENSMUSP00000017365 ENSMUSP00000113852 ENSMUSP00000133571 ENSMUSP00000083587 ENSMUSP00000025161 ENSMUSP00000022380 ENSMUSP00000072859 …	over	0.345314	0.999065	0.0869565
[truncated: 179 more rows]
